# Supplementary material for: Integrated Molecular Profiling of Preclinical and Clinical Cardiac Xenotransplants
Source: Research Square preprint supplement (doi:10.21203/rs.3.rs-8406985/v1), 2026-02-04
Supplement: Supplementary file 1 [file 0f5e2792103a57ca722e303c.xlsx]

## Sheet: Sheet1
Comparison_Type	Condition_Group	Median_Score_Pro_inflammatory	Median_Score_Anti_inflammatory	Mann_Whitney_U_p_value_Raw	FDR_Adjusted_p_value	Significance_Code
Pro-inflammatory vs Anti-inflammatory	Control	0.114778	0.631439	0.0285714	0.0428571	*
Pro-inflammatory vs Anti-inflammatory	3-month protocol	0.221985	0.310407	0.002331	0.00699301	**
Pro-inflammatory vs Anti-inflammatory	Rejection	0.375854	0.265349	0.342857	0.342857	ns
