# Supplementary material for: Integrated Molecular Profiling of Preclinical and Clinical Cardiac Xenotransplants
Source: Research Square preprint supplement (doi:10.21203/rs.3.rs-8406985/v1), 2026-02-04
Supplement: Supplementary file 2 [file 0f9e8eded15d878b9d3fa969.xlsx]

## Sheet: CADM
pathway_name	ligand	receptor	source	target	prob	pval	group
CADM	CADM1	CADM1	Mast cells (baboon)	Neuronal cells	2.17013e-06	0	3-month protocol
CADM	CADM1	CADM1	Mast cells (baboon)	Resident Immune	2.17013e-06	0.01	3-month protocol
CADM	CADM1	CADM1	Neuronal cells	Mast cells (baboon)	2.17013e-06	0	3-month protocol
CADM	CADM1	CADM1	Neuronal cells	Neuronal cells	8.68048e-06	0	3-month protocol
CADM	CADM1	CADM1	Neuronal cells	Neuronal cells	7.99994e-06	0	6-month protocol
CADM	CADM1	CADM1	Neuronal cells	Resident Immune	8.68048e-06	0	3-month protocol
CADM	CADM1	CADM1	Resident Immune	Mast cells (baboon)	2.17013e-06	0.01	3-month protocol
CADM	CADM1	CADM1	Resident Immune	Neuronal cells	8.68048e-06	0	3-month protocol
CADM	CADM1	CADM1	Resident Immune	Resident Immune	8.68048e-06	0	3-month protocol

## Sheet: NEGR
pathway_name	ligand	receptor	source	target	prob	pval	group
NEGR	NEGR1	NEGR1	Fibroblasts	Fibroblasts	8.68048e-06	0	3-month protocol

## Sheet: FN1
pathway_name	ligand	receptor	source	target	prob	pval	group
FN1	FN1	CD44	Endothelial cells (baboon)	CM	7.99994e-06	0	6-month protocol
FN1	FN1	CD44	Endothelial cells (baboon)	Lymphoids (baboon)	7.99994e-06	0	6-month protocol
FN1	FN1	CD44	Endothelial cells (baboon)	Mast cells (baboon)	2.39994e-05	0	6-month protocol
FN1	FN1	CD44	Endothelial cells (baboon)	Myeloids (baboon)	1.59997e-05	0	6-month protocol
FN1	FN1	CD44	Fibroblasts	CM	2.39994e-05	0	6-month protocol
FN1	FN1	CD44	Fibroblasts	Lymphoids (baboon)	8.68048e-06	0	3-month protocol
FN1	FN1	CD44	Fibroblasts	Lymphoids (baboon)	2.39994e-05	0	6-month protocol
FN1	FN1	CD44	Fibroblasts	Mast cells (baboon)	2.17013e-06	0	3-month protocol
FN1	FN1	CD44	Fibroblasts	Mast cells (baboon)	7.19948e-05	0	6-month protocol
FN1	FN1	CD44	Fibroblasts	Myeloids (baboon)	8.68048e-06	0	3-month protocol
FN1	FN1	CD44	Fibroblasts	Myeloids (baboon)	4.79977e-05	0	6-month protocol
FN1	FN1	CD44	Resident Immune	CM	3.99998e-06	0.03	6-month protocol
FN1	FN1	CD44	Resident Immune	Lymphoids (baboon)	3.99998e-06	0.03	6-month protocol
FN1	FN1	CD44	Resident Immune	Mast cells (baboon)	1.19999e-05	0.01	6-month protocol
FN1	FN1	CD44	Resident Immune	Myeloids (baboon)	7.99994e-06	0.02	6-month protocol
FN1	FN1	ITGA3_ITGB1	Endothelial cells (baboon)	Resident Immune	5.65682e-06	0	6-month protocol
FN1	FN1	ITGA3_ITGB1	Fibroblasts	Resident Immune	1.69703e-05	0	6-month protocol
FN1	FN1	ITGA3_ITGB1	Resident Immune	Resident Immune	2.82842e-06	0	6-month protocol
FN1	FN1	ITGA5_ITGB1	Endothelial cells (baboon)	CM	7.99994e-06	0	6-month protocol
FN1	FN1	ITGA5_ITGB1	Fibroblasts	CM	8.68048e-06	0	3-month protocol
FN1	FN1	ITGA5_ITGB1	Fibroblasts	CM	2.39994e-05	0	6-month protocol
FN1	FN1	ITGA5_ITGB1	Resident Immune	CM	3.99998e-06	0	6-month protocol
FN1	FN1	ITGAV_ITGB1	Endothelial cells (baboon)	CM	1.59997e-05	0	6-month protocol
FN1	FN1	ITGAV_ITGB1	Endothelial cells (baboon)	Vascular EC	7.99994e-06	0	6-month protocol
FN1	FN1	ITGAV_ITGB1	Fibroblasts	CM	1.73608e-05	0	3-month protocol
FN1	FN1	ITGAV_ITGB1	Fibroblasts	CM	4.79977e-05	0	6-month protocol
FN1	FN1	ITGAV_ITGB1	Fibroblasts	Vascular EC	2.39994e-05	0	6-month protocol
FN1	FN1	ITGAV_ITGB1	Resident Immune	CM	7.99994e-06	0.02	6-month protocol
FN1	FN1	ITGAV_ITGB1	Resident Immune	Vascular EC	3.99998e-06	0.03	6-month protocol
FN1	FN1	ITGAV_ITGB6	Endothelial cells (baboon)	CM	1.59997e-05	0	6-month protocol
FN1	FN1	ITGAV_ITGB6	Fibroblasts	CM	1.73608e-05	0	3-month protocol
FN1	FN1	ITGAV_ITGB6	Fibroblasts	CM	4.79977e-05	0	6-month protocol
FN1	FN1	ITGAV_ITGB6	Resident Immune	CM	7.99994e-06	0	6-month protocol
FN1	FN1	ITGAV_ITGB8	Endothelial cells (baboon)	CM	1.59997e-05	0	6-month protocol
FN1	FN1	ITGAV_ITGB8	Fibroblasts	CM	1.73608e-05	0	3-month protocol
FN1	FN1	ITGAV_ITGB8	Fibroblasts	CM	4.79977e-05	0	6-month protocol
FN1	FN1	ITGAV_ITGB8	Resident Immune	CM	7.99994e-06	0.02	6-month protocol

## Sheet: NRXN
pathway_name	ligand	receptor	source	target	prob	pval	group
NRXN	NRXN1	NLGN1	Neuronal cells	Neuronal cells	0.000104156	0	3-month protocol

## Sheet: EPHA
pathway_name	ligand	receptor	source	target	prob	pval	group
EPHA	EFNA5	EPHA4	CM	Endocardial/lymphatic EC	0.000173581	0	3-month protocol
EPHA	EFNA5	EPHA4	CM	Endocardial/lymphatic EC	7.99936e-05	0	6-month protocol
EPHA	EFNA5	EPHA4	Endocardial/lymphatic EC	Endocardial/lymphatic EC	1.73608e-05	0	3-month protocol
EPHA	EFNA5	EPHA4	Endocardial/lymphatic EC	Endocardial/lymphatic EC	7.99994e-06	0	6-month protocol
EPHA	EFNA5	EPHA4	Fibroblasts	Endocardial/lymphatic EC	7.99994e-06	0	6-month protocol
EPHA	EFNA5	EPHA4	Resident Immune	Endocardial/lymphatic EC	2.39994e-05	0	6-month protocol
EPHA	EFNA5	EPHA5	CM	Neuronal cells	8.6798e-05	0	3-month protocol
EPHA	EFNA5	EPHA5	Endocardial/lymphatic EC	Neuronal cells	8.68048e-06	0	3-month protocol

## Sheet: SEMA6
pathway_name	ligand	receptor	source	target	prob	pval	group
SEMA6	SEMA6A	PLXNA2	Endocardial/lymphatic EC	CM	3.1999e-05	0	6-month protocol
SEMA6	SEMA6A	PLXNA2	Endocardial/lymphatic EC	Endocardial/lymphatic EC	4.34009e-05	0	3-month protocol
SEMA6	SEMA6A	PLXNA2	Endocardial/lymphatic EC	Endocardial/lymphatic EC	3.1999e-05	0	6-month protocol
SEMA6	SEMA6A	PLXNA2	Endocardial/lymphatic EC	Endothelial cells (baboon)	4.34009e-05	0	3-month protocol
SEMA6	SEMA6A	PLXNA2	Endocardial/lymphatic EC	Endothelial cells (baboon)	0.000127984	0	6-month protocol
SEMA6	SEMA6A	PLXNA2	Endocardial/lymphatic EC	Vascular EC	4.34009e-05	0	3-month protocol
SEMA6	SEMA6A	PLXNA2	Endocardial/lymphatic EC	Vascular EC	0.000127984	0	6-month protocol
SEMA6	SEMA6A	PLXNA2	Vascular EC	Endocardial/lymphatic EC	8.68048e-06	0	3-month protocol
SEMA6	SEMA6A	PLXNA2	Vascular EC	Endothelial cells (baboon)	8.68048e-06	0	3-month protocol
SEMA6	SEMA6A	PLXNA2	Vascular EC	Vascular EC	8.68048e-06	0	3-month protocol
SEMA6	SEMA6A	PLXNA4	Endocardial/lymphatic EC	CM	4.34009e-05	0	3-month protocol
SEMA6	SEMA6A	PLXNA4	Endocardial/lymphatic EC	CM	3.1999e-05	0	6-month protocol
SEMA6	SEMA6A	PLXNA4	Endocardial/lymphatic EC	Endocardial/lymphatic EC	4.34009e-05	0	3-month protocol
SEMA6	SEMA6A	PLXNA4	Endocardial/lymphatic EC	Fibroblasts	0.000216967	0	3-month protocol
SEMA6	SEMA6A	PLXNA4	Endocardial/lymphatic EC	Fibroblasts	6.39959e-05	0	6-month protocol
SEMA6	SEMA6A	PLXNA4	Vascular EC	CM	8.68048e-06	0	3-month protocol
SEMA6	SEMA6A	PLXNA4	Vascular EC	Endocardial/lymphatic EC	8.68048e-06	0	3-month protocol
SEMA6	SEMA6A	PLXNA4	Vascular EC	Fibroblasts	4.34009e-05	0	3-month protocol

## Sheet: ESAM
pathway_name	ligand	receptor	source	target	prob	pval	group
ESAM	ESAM	ESAM	Vascular EC	Vascular EC	8.68048e-06	0	3-month protocol
ESAM	ESAM	ESAM	Vascular EC	Vascular EC	7.99994e-06	0	6-month protocol

## Sheet: CDH
pathway_name	ligand	receptor	source	target	prob	pval	group
CDH	CDH2	CDH2	CM	CM	0.0117441	0	3-month protocol
CDH	CDH2	CDH2	CM	CM	0.00385707	0	6-month protocol

## Sheet: CDH5
pathway_name	ligand	receptor	source	target	prob	pval	group
CDH5	CDH5	CDH5	Vascular EC	Vascular EC	8.68048e-06	0	3-month protocol
CDH5	CDH5	CDH5	Vascular EC	Vascular EC	7.99994e-06	0	6-month protocol

## Sheet: APP
pathway_name	ligand	receptor	source	target	prob	pval	group
APP	APP	CD74	CM	Endothelial cells (baboon)	1.73608e-05	0	3-month protocol
APP	APP	CD74	CM	Endothelial cells (baboon)	2.39994e-05	0	6-month protocol
APP	APP	CD74	CM	Myeloids (baboon)	0.00013887	0	3-month protocol
APP	APP	CD74	CM	Myeloids (baboon)	3.1999e-05	0	6-month protocol
APP	APP	CD74	Endocardial/lymphatic EC	Endothelial cells (baboon)	1.73608e-05	0	3-month protocol
APP	APP	CD74	Endocardial/lymphatic EC	Endothelial cells (baboon)	2.39994e-05	0	6-month protocol
APP	APP	CD74	Endocardial/lymphatic EC	Myeloids (baboon)	0.00013887	0	3-month protocol
APP	APP	CD74	Endocardial/lymphatic EC	Myeloids (baboon)	3.1999e-05	0	6-month protocol
APP	APP	CD74	Endothelial cells (baboon)	Endothelial cells (baboon)	2.17013e-06	0.01	3-month protocol
APP	APP	CD74	Endothelial cells (baboon)	Endothelial cells (baboon)	1.19999e-05	0	6-month protocol
APP	APP	CD74	Endothelial cells (baboon)	Myeloids (baboon)	1.73608e-05	0	3-month protocol
APP	APP	CD74	Endothelial cells (baboon)	Myeloids (baboon)	1.59997e-05	0	6-month protocol
APP	APP	CD74	Fibroblasts	Endothelial cells (baboon)	4.34026e-06	0.01	3-month protocol
APP	APP	CD74	Fibroblasts	Endothelial cells (baboon)	5.99996e-06	0	6-month protocol
APP	APP	CD74	Fibroblasts	Myeloids (baboon)	3.4721e-05	0	3-month protocol
APP	APP	CD74	Fibroblasts	Myeloids (baboon)	7.99994e-06	0	6-month protocol
APP	APP	CD74	Mural cells	Endothelial cells (baboon)	4.34026e-06	0.01	3-month protocol
APP	APP	CD74	Mural cells	Endothelial cells (baboon)	5.99996e-06	0	6-month protocol
APP	APP	CD74	Mural cells	Myeloids (baboon)	3.4721e-05	0	3-month protocol
APP	APP	CD74	Mural cells	Myeloids (baboon)	7.99994e-06	0	6-month protocol
APP	APP	CD74	Neuronal cells	Endothelial cells (baboon)	4.34026e-06	0.01	3-month protocol
APP	APP	CD74	Neuronal cells	Endothelial cells (baboon)	2.39994e-05	0	6-month protocol
APP	APP	CD74	Neuronal cells	Myeloids (baboon)	3.4721e-05	0	3-month protocol
APP	APP	CD74	Neuronal cells	Myeloids (baboon)	3.1999e-05	0	6-month protocol
APP	APP	CD74	Resident Immune	Endothelial cells (baboon)	4.34026e-06	0.01	3-month protocol
APP	APP	CD74	Resident Immune	Endothelial cells (baboon)	5.99996e-06	0	6-month protocol
APP	APP	CD74	Resident Immune	Myeloids (baboon)	3.4721e-05	0	3-month protocol
APP	APP	CD74	Resident Immune	Myeloids (baboon)	7.99994e-06	0	6-month protocol
APP	APP	CD74	Vascular EC	Endothelial cells (baboon)	2.17009e-05	0	3-month protocol
APP	APP	CD74	Vascular EC	Endothelial cells (baboon)	4.19982e-05	0	6-month protocol
APP	APP	CD74	Vascular EC	Myeloids (baboon)	0.000173581	0	3-month protocol
APP	APP	CD74	Vascular EC	Myeloids (baboon)	5.59969e-05	0	6-month protocol

[truncated: 31 more sheets: FGF, ANGPT, CD99, VEGF, CSF, THBS, NOTCH, PTPRM, GHRELIN, EPHB, KIT, NCAM, VISFATIN, TENASCIN, LAMININ, RELN, SEMA4, BMP, JAM, MPZ …]
