# Supplementary material for: Integrated Molecular Profiling of Preclinical and Clinical Cardiac Xenotransplants
Source: Research Square preprint supplement (doi:10.21203/rs.3.rs-8406985/v1), 2026-02-04
Supplement: Supplementary file 3 [file 19d8f132e101308dbbfc6d2b.xlsx]

## Sheet: Sheet1
sample	cell_state	count	proportion	percentage
xHTx patient 1	Angiogenic_art	3	0.0131004	1.31004
xHTx patient 1	Angiogenic_cap	2	0.00873362	0.873362
xHTx patient 1	Antiinf_EC	15	0.0655022	6.55022
xHTx patient 1	Arterial_EC	37	0.161572	16.1572
xHTx patient 1	Cap_EC	51	0.222707	22.2707
xHTx patient 1	Cap_EC_ISG	68	0.296943	29.6943
xHTx patient 1	Meso_EC	0	0	0
xHTx patient 1	NFkB_EC	48	0.209607	20.9607
xHTx patient 1	Prolif_PCMV/PRV_sus	5	0.0218341	2.18341
xHTx patient 1	Angiogenic_art	62	0.0651261	6.51261
xHTx patient 2	Angiogenic_cap	188	0.197479	19.7479
xHTx patient 2	Antiinf_EC	140	0.147059	14.7059
xHTx patient 2	Arterial_EC	95	0.0997899	9.97899
xHTx patient 2	Cap_EC	278	0.292017	29.2017
xHTx patient 2	Cap_EC_ISG	73	0.0766807	7.66807
xHTx patient 2	Meso_EC	12	0.012605	1.2605
xHTx patient 2	NFkB_EC	47	0.0493697	4.93697
xHTx patient 2	Prolif_PCMV/PRV_sus	57	0.0598739	5.98739
Control	Angiogenic_art	15	0.0903614	9.03614
Control	Angiogenic_cap	11	0.0662651	6.62651
Control	Antiinf_EC	2	0.0120482	1.20482
Control	Arterial_EC	27	0.162651	16.2651
Control	Cap_EC	84	0.506024	50.6024
Control	Cap_EC_ISG	9	0.0542169	5.42169
Control	Meso_EC	7	0.0421687	4.21687
Control	NFkB_EC	9	0.0542169	5.42169
Control	Prolif_PCMV/PRV_sus	2	0.0120482	1.20482
