# Supplementary material for: Integrated Molecular Profiling of Preclinical and Clinical Cardiac Xenotransplants
Source: Research Square preprint supplement (doi:10.21203/rs.3.rs-8406985/v1), 2026-02-04
Supplement: Supplementary file 4 [file 2111bac4bbffff2f8e9e5c7e.xlsx]

## Sheet: Sheet1
Condition	CellType	PValue	EffectSize	FoldChange	MeanPropControl	FDR
3-month protocol	CM	0.0114751	-0.896482	0.408002	0.788101	0.0180322
3-month protocol	Endocardial/lymphatic EC	0.0424774	-1.06313	0.345372	0.0106984	0.0519168
3-month protocol	Endothelial cells (baboon)	0.075637	2.06798	7.90884	3.6935e-06	0.075637
3-month protocol	Fibroblasts	0.034791	-0.907735	0.403437	0.0743539	0.0478377
3-month protocol	Lymphoids (baboon)	1.33184e-07	4.14727	63.2609	0.00014425	7.32509e-07
3-month protocol	Mast cells (baboon)	0.0655801	2.29751	9.9494	2.96339e-06	0.0721381
3-month protocol	Mural cells	3.29791e-05	-1.44955	0.234676	0.0318076	7.25539e-05
3-month protocol	Myeloids (baboon)	8.92793e-09	4.61872	101.364	0.000233645	9.82073e-08
3-month protocol	Neuronal cells	1.23818e-05	-1.73765	0.175933	0.00740177	3.40501e-05
3-month protocol	Resident Immune	4.45876e-06	-5.96771	0.00256009	0.0493487	1.63488e-05
3-month protocol	Vascular EC	0.00113532	-1.10921	0.329819	0.0379037	0.00208142
PCMV/PRV	CM	0.855586	-0.126513	0.881163	0.788101	0.855586
PCMV/PRV	Endocardial/lymphatic EC	0.0375693	-0.986652	0.372823	0.0106984	0.068877
PCMV/PRV	Endothelial cells (baboon)	0.500789	0.382858	1.46647	3.6935e-06	0.616988
PCMV/PRV	Fibroblasts	0.522775	-0.230722	0.793961	0.0743539	0.616988
PCMV/PRV	Lymphoids (baboon)	0.000554431	1.9562	7.07242	0.00014425	0.00609874
PCMV/PRV	Mast cells (baboon)	0.500789	0.382858	1.46647	2.96339e-06	0.616988
PCMV/PRV	Mural cells	0.00737851	-0.556774	0.573055	0.0318076	0.0162327
PCMV/PRV	Myeloids (baboon)	0.00131801	2.58738	13.2949	0.000233645	0.00724903
PCMV/PRV	Neuronal cells	0.00513978	-1.31349	0.268881	0.00740177	0.0141344
PCMV/PRV	Resident Immune	0.00408234	-1.84294	0.158351	0.0493487	0.0141344
PCMV/PRV	Vascular EC	0.560898	-0.252209	0.777082	0.0379037	0.616988
6-month protocol	CM	0.000412104	-1.47505	0.228768	0.788101	0.000755523
6-month protocol	Endocardial/lymphatic EC	0.00413872	-1.94469	0.143031	0.0106984	0.0056592
6-month protocol	Endothelial cells (baboon)	0.000749891	4.54527	94.1857	3.6935e-06	0.0011784
6-month protocol	Fibroblasts	0.00463026	-1.48377	0.226782	0.0743539	0.0056592
6-month protocol	Lymphoids (baboon)	4.16496e-05	3.75831	42.876	0.00014425	0.000152715
6-month protocol	Mast cells (baboon)	0.000243328	3.6249	37.5211	2.96339e-06	0.000535321
6-month protocol	Mural cells	0.0126023	-1.427	0.240028	0.0318076	0.0126023
6-month protocol	Myeloids (baboon)	4.4025e-06	4.72944	113.232	0.000233645	2.42138e-05
6-month protocol	Neuronal cells	0.000176666	-2.22424	0.10815	0.00740177	0.000485832
6-month protocol	Resident Immune	1.91232e-06	-6.31615	0.00180689	0.0493487	2.10355e-05
6-month protocol	Vascular EC	0.00862782	-1.78703	0.167456	0.0379037	0.00949061
Rejection	CM	0.00885347	-1.51429	0.219965	0.788101	0.0162314
Rejection	Endocardial/lymphatic EC	0.016306	-1.92552	0.1458	0.0106984	0.0228953
Rejection	Endothelial cells (baboon)	0.0501188	2.32327	10.209	3.6935e-06	0.0551307
Rejection	Fibroblasts	0.147526	-0.742449	0.475947	0.0743539	0.147526
Rejection	Lymphoids (baboon)	0.000161757	4.14866	63.3489	0.00014425	0.000444833
Rejection	Mast cells (baboon)	0.0464083	3.31699	27.5773	2.96339e-06	0.0551307
Rejection	Mural cells	8.06687e-05	-1.6858	0.185297	0.0318076	0.00035479
Rejection	Myeloids (baboon)	9.51081e-07	4.68217	108.005	0.000233645	1.04619e-05
Rejection	Neuronal cells	9.67609e-05	-2.49785	0.0822619	0.00740177	0.00035479
Rejection	Resident Immune	0.0166511	-5.02677	0.00655998	0.0493487	0.0228953
Rejection	Vascular EC	0.00109862	-1.07843	0.340129	0.0379037	0.00241697
Prematurely terminated	CM	0.0264295	-1.05235	0.349118	0.788101	0.0726812
Prematurely terminated	Endocardial/lymphatic EC	0.0102386	-0.969146	0.379407	0.0106984	0.0563122
Prematurely terminated	Endothelial cells (baboon)	0.282247	1.71971	5.58292	3.6935e-06	0.38809
Prematurely terminated	Fibroblasts	0.585109	-0.318766	0.727046	0.0743539	0.64362
Prematurely terminated	Lymphoids (baboon)	0.00320395	2.19384	8.96962	0.00014425	0.0352434
Prematurely terminated	Mast cells (baboon)	0.0245099	-0.896868	0.407845	2.96339e-06	0.0726812
Prematurely terminated	Mural cells	0.441489	-0.314458	0.730184	0.0318076	0.539597
Prematurely terminated	Myeloids (baboon)	0.0736565	1.08469	2.95851	0.000233645	0.162044
Prematurely terminated	Neuronal cells	0.206471	-0.766291	0.464734	0.00740177	0.324454
Prematurely terminated	Resident Immune	0.187978	-0.605543	0.545778	0.0493487	0.324454
Prematurely terminated	Vascular EC	0.79705	-0.0748236	0.927907	0.0379037	0.79705
