# Supplementary material for: Integrated Molecular Profiling of Preclinical and Clinical Cardiac Xenotransplants
Source: Research Square preprint supplement (doi:10.21203/rs.3.rs-8406985/v1), 2026-02-04
Supplement: Supplementary file 5 [file 263aef10339482c8b78ac406.xlsx]

## Sheet: vFB4
Gene	logFC	logCPM	F	PValue	FDR	Observations_PCMV/PRV	Observations_3month_protocol	level
Sus_scrofa___KANK1	4.64008	6.50584	68.6986	5.63744e-10	9.06827e-06	3	6	Up-regulated
Sus_scrofa___ITPR1	2.0412	9.18088	73.2898	1.04696e-09	9.06827e-06	3	6	Up-regulated
Sus_scrofa___ENSSSCG00000038187	2.52387	7.04954	47.1747	1.02228e-07	0.000394295	3	6	Up-regulated
Sus_scrofa___FRMPD4	5.08147	5.98813	42.3671	1.13807e-07	0.000394295	3	6	Up-regulated
Sus_scrofa___THSD7B	4.72558	5.14232	38.0784	2.26901e-07	0.000655101	3	6	Up-regulated
Sus_scrofa___VAV3	2.7866	8.65415	41.1214	3.66795e-07	0.000907714	3	6	Up-regulated
Sus_scrofa___NTF3	6.3686	5.03856	39.5444	5.08567e-07	0.00110124	3	6	Up-regulated
Sus_scrofa___ENSSSCG00000016263	3.35761	6.74208	37.5531	5.79386e-07	0.00111519	3	6	Up-regulated
Sus_scrofa___SPOCK3	2.45484	7.41503	35.5319	1.31263e-06	0.00227387	3	6	Up-regulated
Sus_scrofa___ENSSSCG00000049691	1.9731	8.92391	35.1186	1.45838e-06	0.00229668	3	6	Up-regulated
Sus_scrofa___CCN4	5.4715	6.16408	31.2114	1.77412e-06	0.0025611	3	6	Up-regulated
Sus_scrofa___ENSSSCG00000013260	4.93061	4.0769	31.7086	2.04375e-06	0.00272338	3	6	Up-regulated
Sus_scrofa___OSBPL11	2.12921	6.71316	33.3956	2.21767e-06	0.00274405	3	6	Up-regulated
Sus_scrofa___PI15	4.52358	7.36362	30.4526	3.18428e-06	0.00344758	3	6	Up-regulated
Sus_scrofa___PTN	3.91454	5.68368	28.7831	3.86861e-06	0.00394212	3	6	Up-regulated
Sus_scrofa___ENSSSCG00000009633	1.81178	7.73635	30.1116	5.20261e-06	0.00450624	3	6	Up-regulated
Sus_scrofa___PAPPA	2.69349	8.89209	29.3445	6.35385e-06	0.00464401	3	6	Up-regulated
Sus_scrofa___CXCL10	5.62691	4.42889	27.3891	7.22625e-06	0.00464401	3	6	Up-regulated
Sus_scrofa___TP53INP1	2.40781	6.28152	28.3012	7.30495e-06	0.00464401	3	6	Up-regulated
Sus_scrofa___KCNN3	3.04572	6.24209	27.4816	7.37228e-06	0.00464401	3	6	Up-regulated
Sus_scrofa___MGMT	1.85699	7.48495	28.795	7.37669e-06	0.00464401	3	6	Up-regulated
Sus_scrofa___ENSSSCG00000004081	2.11223	6.66943	28.5213	7.52249e-06	0.00464401	3	6	Up-regulated
Sus_scrofa___HOMER1	4.6836	4.87139	27.6432	7.59009e-06	0.00464401	3	6	Up-regulated
Sus_scrofa___FBXO21	1.82367	7.16433	28.608	7.78091e-06	0.00464401	3	6	Up-regulated
Sus_scrofa___PALMD	3.73155	5.27127	26.1634	7.99711e-06	0.00464401	3	6	Up-regulated
Sus_scrofa___ENSSSCG00000007001	2.79442	5.48501	26.7027	9.04705e-06	0.00505555	3	6	Up-regulated
Sus_scrofa___SHISA9	6.22672	5.78933	27.2602	9.53473e-06	0.00516156	3	6	Up-regulated
Sus_scrofa___GTF2A1L	1.72785	7.64366	27.1217	1.16503e-05	0.0056776	3	6	Up-regulated
Sus_scrofa___CYYR1	2.58769	5.25989	24.9091	1.1799e-05	0.0056776	3	6	Up-regulated
Sus_scrofa___CDCA7L	5.97212	4.14019	29.3205	1.2605e-05	0.00580539	3	6	Up-regulated
Sus_scrofa___RGS2	5.52365	5.83318	25.3795	1.30191e-05	0.00580539	3	6	Up-regulated
Sus_scrofa___APP	1.47744	8.94379	26.5879	1.33355e-05	0.00580539	3	6	Up-regulated
Sus_scrofa___DDIT4	3.56304	6.50222	25.2581	1.34306e-05	0.00580539	3	6	Up-regulated
Sus_scrofa___MAGI1	2.15758	9.56709	26.4815	1.37402e-05	0.00580539	3	6	Up-regulated
Sus_scrofa___IRS2	3.73865	6.2317	24.0418	1.70267e-05	0.00702272	3	6	Up-regulated
Sus_scrofa___NMNAT2	2.24887	5.94283	25.1703	1.74515e-05	0.00703053	3	6	Up-regulated
Sus_scrofa___AKAP6	2.1399	6.25164	24.6244	2.09158e-05	0.00823466	3	6	Up-regulated
Sus_scrofa___ACOT11	4.81248	4.56117	24.3841	2.28444e-05	0.00879408	3	6	Up-regulated
Sus_scrofa___ENSSSCG00000017754	2.53967	5.20314	22.7718	2.34317e-05	0.00882407	3	6	Up-regulated
Sus_scrofa___CPNE3	1.75193	5.90358	23.4602	2.48913e-05	0.00901762	3	6	Up-regulated
Sus_scrofa___ROR2	2.78885	7.48333	24.2598	2.58047e-05	0.00901762	3	6	Up-regulated
Sus_scrofa___PRICKLE2	1.41062	9.88547	24.2438	2.60279e-05	0.00901762	3	6	Up-regulated
Sus_scrofa___ZFHX4	2.31611	7.46516	23.8406	2.97129e-05	0.0100925	3	6	Up-regulated
Sus_scrofa___RPL35	2.16841	6.38907	23.3718	3.2078e-05	0.0106863	3	6	Up-regulated
Sus_scrofa___SLC9B2	3.00614	4.56667	22.3877	3.32144e-05	0.0107728	3	6	Up-regulated
Sus_scrofa___OGDH	1.79289	6.42736	22.8453	3.39218e-05	0.0107728	3	6	Up-regulated
Sus_scrofa___EVL	1.91814	5.84488	22.8461	3.42035e-05	0.0107728	3	6	Up-regulated
Sus_scrofa___SLITRK6	5.71916	3.77774	22.6486	3.7671e-05	0.0116531	3	6	Up-regulated
Sus_scrofa___TUT7	1.2669	8.61532	22.7331	4.08276e-05	0.0119318	3	6	Up-regulated
Sus_scrofa___DDX60	2.88378	6.53538	22.5186	4.11244e-05	0.0119318	3	6	Up-regulated
Sus_scrofa___ADCY2	2.08573	7.15401	22.6867	4.13269e-05	0.0119318	3	6	Up-regulated
Sus_scrofa___MDGA2	3.00075	5.12804	21.0037	4.35421e-05	0.0123652	3	6	Up-regulated
Sus_scrofa___TMSB10	1.90205	5.84451	22.0329	4.43739e-05	0.0123982	3	6	Up-regulated
Sus_scrofa___ENSSSCG00000006418	3.16107	4.77344	20.6514	4.55467e-05	0.0125239	3	6	Up-regulated
Sus_scrofa___RCSD1	2.30706	6.6172	21.9497	5.11248e-05	0.0138075	3	6	Up-regulated
Sus_scrofa___ENC1	2.58266	4.8139	20.2544	5.1809e-05	0.0138075	3	6	Up-regulated
Sus_scrofa___RSAD2	4.06972	6.05092	21.4992	5.47416e-05	0.014368	3	6	Up-regulated
Sus_scrofa___FOXS1	3.11695	4.76792	19.8498	6.65681e-05	0.0172113	3	6	Up-regulated
Sus_scrofa___AUTS2	1.14788	11.2936	20.9655	7.00088e-05	0.0178347	3	6	Up-regulated
Sus_scrofa___ZMAT3	2.25111	4.93543	19.8795	7.71894e-05	0.019379	3	6	Up-regulated
Sus_scrofa___BMP6	1.45907	9.17574	20.3847	8.40912e-05	0.0205171	3	6	Up-regulated
Sus_scrofa___ADAMTS3	2.95103	6.79274	19.6391	8.69621e-05	0.0205178	3	6	Up-regulated
Sus_scrofa___LGALS3BP	3.24987	5.15976	18.8123	8.7566e-05	0.0205178	3	6	Up-regulated
Sus_scrofa___ENSSSCG00000001229	2.16723	7.5331	20.2852	8.76475e-05	0.0205178	3	6	Up-regulated
Sus_scrofa___MLXIP	1.12149	8.59244	19.9346	9.71446e-05	0.021855	3	6	Up-regulated
Sus_scrofa___CTSC	2.59704	6.24348	19.1756	0.000100912	0.0219171	3	6	Up-regulated
Sus_scrofa___IFIT1	2.6085	6.45773	19.379	0.000102178	0.0219171	3	6	Up-regulated
Sus_scrofa___USP18	2.24436	6.82261	19.4612	0.000103097	0.0219171	3	6	Up-regulated
Sus_scrofa___ENSSSCG00000033262	2.00481	7.02103	19.7674	0.00010322	0.0219171	3	6	Up-regulated
Sus_scrofa___MMP11	5.43277	4.03123	19.8635	0.00010609	0.0221422	3	6	Up-regulated
Sus_scrofa___CPEB2	2.07318	6.76335	19.4525	0.000112097	0.0231174	3	6	Up-regulated
Sus_scrofa___TOX	3.13983	4.43624	17.5872	0.000115517	0.0235423	3	6	Up-regulated
Sus_scrofa___TMCC3	2.18376	6.05493	19.0241	0.000122889	0.0240887	3	6	Up-regulated
Sus_scrofa___C2CD3	1.44701	6.86575	19.2242	0.000123085	0.0240887	3	6	Up-regulated
Sus_scrofa___LRRFIP1	1.29723	8.59434	19.158	0.000124916	0.0240887	3	6	Up-regulated
Sus_scrofa___CRLF1	2.53891	5.88748	19.3517	0.000126213	0.0240887	3	6	Up-regulated
Sus_scrofa___CFAP20DC	1.32454	6.37775	19.0436	0.000127379	0.0240887	3	6	Up-regulated
Sus_scrofa___LRRC32	3.25949	4.20723	17.8444	0.000127932	0.0240887	3	6	Up-regulated
Sus_scrofa___LUM	1.88111	7.19607	18.794	0.000141667	0.0261492	3	6	Up-regulated
Sus_scrofa___ENSSSCG00000010954	2.08546	5.2392	17.8278	0.000141894	0.0261492	3	6	Up-regulated
Sus_scrofa___MX2	3.32605	7.95559	18.0975	0.000152791	0.027861	3	6	Up-regulated
Sus_scrofa___ENSSSCG00000009293	1.93471	7.25058	18.3523	0.000161451	0.0291334	3	6	Up-regulated
Sus_scrofa___ENSSSCG00000009240	2.44906	5.79121	17.5953	0.000167789	0.0296894	3	6	Up-regulated
Sus_scrofa___BANK1	2.62522	4.37892	16.9025	0.000167959	0.0296894	3	6	Up-regulated
Sus_scrofa___TSC22D1	1.3921	7.64748	18.1434	0.000175083	0.0300038	3	6	Up-regulated
Sus_scrofa___RESF1	1.55681	6.70542	18.0634	0.000176666	0.0300038	3	6	Up-regulated
Sus_scrofa___DPYSL3	1.64372	8.16734	17.7801	0.000196766	0.0324626	3	6	Up-regulated
Sus_scrofa___ENSSSCG00000029441	3.51764	4.0139	16.421	0.000206658	0.0333441	3	6	Up-regulated
Sus_scrofa___RAI14	1.34834	8.81107	17.5954	0.000209023	0.0333441	3	6	Up-regulated
Sus_scrofa___SLC35B4	4.34178	4.62152	18.3231	0.000211733	0.0333441	3	6	Up-regulated
Sus_scrofa___PLEKHM3	2.66705	5.25347	16.5222	0.000217601	0.0336777	3	6	Up-regulated
Sus_scrofa___H3-5	1.49323	7.19482	17.496	0.000217739	0.0336777	3	6	Up-regulated
Sus_scrofa___ENSSSCG00000013366	2.15334	5.26634	16.289	0.000237484	0.0362008	3	6	Up-regulated
Sus_scrofa___FBN2	1.78308	8.49348	17.1846	0.000240214	0.0362008	3	6	Up-regulated
Sus_scrofa___PARP14	2.70499	6.08252	16.4554	0.00024219	0.0362008	3	6	Up-regulated
Sus_scrofa___TXNIP	2.21155	8.31054	17.1447	0.00024386	0.0362008	3	6	Up-regulated
Sus_scrofa___GPC1	5.25525	4.04126	17.7715	0.000246591	0.0362008	3	6	Up-regulated
Sus_scrofa___TIMP1	2.02882	5.66135	16.0543	0.00027453	0.0396218	3	6	Up-regulated
Sus_scrofa___COLEC12	1.33421	9.72335	16.7604	0.000276756	0.0396218	3	6	Up-regulated
Sus_scrofa___CMPK2	2.45136	5.70328	16.0915	0.000284799	0.0401104	3	6	Up-regulated
Sus_scrofa___HSD11B1L	2.18058	6.13997	16.3367	0.000299893	0.0415604	3	6	Up-regulated
Sus_scrofa___CD109	1.55707	6.22186	16.3259	0.000317046	0.0432861	3	6	Up-regulated
Sus_scrofa___PEAK1	1.26766	10.026	16.3604	0.000317593	0.0432861	3	6	Up-regulated
Sus_scrofa___SPEF2	1.95802	6.54916	16.305	0.000319842	0.0432861	3	6	Up-regulated
Sus_scrofa___CCND3	1.51382	9.60882	16.2014	0.000335666	0.0447288	3	6	Up-regulated
Sus_scrofa___SMAD7	1.7039	6.7077	15.926	0.000364216	0.0470844	3	6	Up-regulated
Sus_scrofa___UBE2H	1.16131	8.78931	15.9409	0.000367777	0.0471926	3	6	Up-regulated
Sus_scrofa___ECM1	1.98038	5.4937	15.4844	0.000374537	0.0473266	3	6	Up-regulated
Sus_scrofa___ENSSSCG00000013889	2.58974	5.90634	15.3914	0.000390742	0.0486966	3	6	Up-regulated
Sus_scrofa___HADHB	3.03222	4.5645	15.2149	0.000398782	0.0492368	3	6	Up-regulated
Sus_scrofa___RAD51B	1.13156	8.94388	15.6946	0.000400761	0.0492368	3	6	Up-regulated
Sus_scrofa___GPC5	-5.53393	8.54526	62.6753	2.60337e-09	1.50327e-05	3	6	Down-regulated
Sus_scrofa___TMEFF2	-3.37066	8.04116	32.284	2.78303e-06	0.00321403	3	6	Down-regulated
Sus_scrofa___CA10	-2.39854	7.7121	30.7156	4.21943e-06	0.00406073	3	6	Down-regulated
Sus_scrofa___CD34	-2.08059	7.17793	30.1514	5.15844e-06	0.00450624	3	6	Down-regulated
Sus_scrofa___ITGB3	-3.12269	6.35877	28.1882	8.0425e-06	0.00464401	3	6	Down-regulated
Sus_scrofa___ELN	-2.50301	7.10884	27.3123	1.10673e-05	0.0056776	3	6	Down-regulated
Sus_scrofa___LTBP1	-2.05951	9.81631	27.1635	1.13492e-05	0.0056776	3	6	Down-regulated
Sus_scrofa___SLC29A1	-3.76446	4.65829	22.6312	2.51287e-05	0.00901762	3	6	Down-regulated
Sus_scrofa___ISM1	-3.21362	7.93913	22.6689	4.0468e-05	0.0119318	3	6	Down-regulated
Sus_scrofa___PCDH7	-4.89207	6.08018	20.1362	7.95933e-05	0.0196971	3	6	Down-regulated
Sus_scrofa___GAP43	-2.00707	6.15139	20.1514	9.05614e-05	0.0209173	3	6	Down-regulated
Sus_scrofa___OSM	-4.71403	3.90601	18.482	9.53779e-05	0.0217399	3	6	Down-regulated
Sus_scrofa___GPS2	-1.7747	5.5528	19.3536	0.000103746	0.0219171	3	6	Down-regulated
Sus_scrofa___SMOC1	-1.6537	8.01627	19.1321	0.000125897	0.0240887	3	6	Down-regulated
Sus_scrofa___MEOX2	-2.01728	7.55796	18.1664	0.000173384	0.0300038	3	6	Down-regulated
Sus_scrofa___MITF	-2.40139	8.87582	18.101	0.000176206	0.0300038	3	6	Down-regulated
Sus_scrofa___NRXN1	-4.55734	7.64759	18.0291	0.000178412	0.0300062	3	6	Down-regulated
Sus_scrofa___PRRX1	-2.04737	6.8642	17.9512	0.000187086	0.0311623	3	6	Down-regulated
Sus_scrofa___CD302	-1.85688	5.86738	17.7199	0.000199646	0.0326271	3	6	Down-regulated
Sus_scrofa___DMD	-1.72642	9.10526	17.5589	0.000211149	0.0333441	3	6	Down-regulated
Sus_scrofa___RUNDC3B	-4.08201	4.66452	16.6482	0.000244511	0.0362008	3	6	Down-regulated
Sus_scrofa___NXPH2	-3.07265	5.69771	16.2164	0.000273472	0.0396218	3	6	Down-regulated
Sus_scrofa___SDC2	-1.60305	8.33462	16.6896	0.000283851	0.0401104	3	6	Down-regulated
Sus_scrofa___ABI3BP	-2.7027	8.31503	16.6257	0.000290885	0.0406371	3	6	Down-regulated
Sus_scrofa___RSPO2	-4.74616	4.8465	16.4395	0.000333508	0.0447288	3	6	Down-regulated
Sus_scrofa___SLC25A29	-1.49565	6.81418	16.1767	0.000341389	0.0450534	3	6	Down-regulated
Sus_scrofa___TNIP3	-3.4718	4.54167	15.3067	0.000343304	0.0450534	3	6	Down-regulated
Sus_scrofa___TTN	-2.5105	8.86955	16.0223	0.000357672	0.0465861	3	6	Down-regulated
Sus_scrofa___ADAMTS15	-2.25285	5.09478	15.3481	0.000373421	0.0473266	3	6	Down-regulated
Sus_scrofa___TNXB	-2.03865	8.68639	15.8701	0.000377017	0.0473266	3	6	Down-regulated
Sus_scrofa___RBPJ	-1.2952	8.88184	15.6564	0.000406109	0.0495424	3	6	Down-regulated
Sus_scrofa___SNED1	-2.32277	8.47233	15.6298	0.000411206	0.0498135	3	6	Down-regulated

## Sheet: vCM2_ISG
Gene	logFC	logCPM	F	PValue	FDR	Observations_PCMV/PRV	Observations_3month_protocol	level
Sus_scrofa___ETV7	5.49218	2.38522	77.5854	8.85727e-11	2.1641e-06	3	7	Up-regulated
Sus_scrofa___ISG20	6.27158	2.28956	69.6079	4.52793e-10	5.00204e-06	3	7	Up-regulated
Sus_scrofa___UBE2L6	6.19575	3.81273	74.7832	6.14174e-10	5.00204e-06	3	7	Up-regulated
Sus_scrofa___LGALS1	5.25415	1.73028	65.0847	1.78845e-09	8.53381e-06	3	7	Up-regulated
Sus_scrofa___FOXS1	6.98081	5.38418	73.893	2.06233e-09	8.53381e-06	3	7	Up-regulated
Sus_scrofa___ARMC12	2.77249	2.95973	79.9861	2.40827e-09	8.53381e-06	3	7	Up-regulated
Sus_scrofa___TEP1	1.83906	5.07	79.6237	2.4685e-09	8.53381e-06	3	7	Up-regulated
Sus_scrofa___BST2	7.34261	4.15903	72.9553	2.8733e-09	8.53381e-06	3	7	Up-regulated
Sus_scrofa___ENSSSCG00000014672	4.47607	2.33157	58.9701	3.14346e-09	8.53381e-06	3	7	Up-regulated
Sus_scrofa___ENSSSCG00000016263	4.91038	3.83373	64.9162	6.63317e-09	1.62068e-05	3	7	Up-regulated
Sus_scrofa___MX2	7.68076	6.86638	66.3268	9.04973e-09	1.90688e-05	3	7	Up-regulated
Sus_scrofa___HTATIP2	2.07907	3.9876	69.4241	9.36545e-09	1.90688e-05	3	7	Up-regulated
Sus_scrofa___SETX	2.74392	6.59272	68.4214	1.05898e-08	1.99032e-05	3	7	Up-regulated
Sus_scrofa___PARP3	2.2445	4.82906	67.3298	1.23691e-08	2.15867e-05	3	7	Up-regulated
Sus_scrofa___C20orf96	3.77037	2.27846	62.3491	1.60136e-08	2.6084e-05	3	7	Up-regulated
Sus_scrofa___ANO6	5.36587	6.81635	63.4938	2.15693e-08	3.11219e-05	3	7	Up-regulated
Sus_scrofa___C1orf115	3.68705	2.45876	56.3558	2.1654e-08	3.11219e-05	3	7	Up-regulated
Sus_scrofa___H1-0	2.55513	2.87038	60.9868	3.23581e-08	4.36158e-05	3	7	Up-regulated
Sus_scrofa___HERC5	5.13992	6.903	59.8247	3.78633e-08	4.62556e-05	3	7	Up-regulated
Sus_scrofa___EDN1	5.97401	2.51434	46.9212	4.34138e-08	5.05109e-05	3	7	Up-regulated
Sus_scrofa___CCDC194	3.99133	1.48297	45.7749	7.39706e-08	7.85793e-05	3	7	Up-regulated
Sus_scrofa___INSIG1	3.73573	1.72787	51.2072	8.90161e-08	8.69972e-05	3	7	Up-regulated
Sus_scrofa___MX1	5.79567	6.83013	51.0692	9.57445e-08	8.99741e-05	3	7	Up-regulated
Sus_scrofa___ENSSSCG00000028691	3.16532	3.27519	53.4966	1.03898e-07	9.40198e-05	3	7	Up-regulated
Sus_scrofa___HLA-DOB	6.05692	1.34957	48.6368	1.17903e-07	0.000102883	3	7	Up-regulated
Sus_scrofa___SCNN1A	3.28462	1.91958	49.4218	1.68654e-07	0.000142094	3	7	Up-regulated
Sus_scrofa___OAS2	4.88372	7.37728	49.6475	1.92159e-07	0.000156501	3	7	Up-regulated
Sus_scrofa___GK5	2.19462	5.57586	49.2693	2.04752e-07	0.000161377	3	7	Up-regulated
Sus_scrofa___HES4	5.57948	1.904	46.0177	2.28194e-07	0.000165023	3	7	Up-regulated
Sus_scrofa___PIR	2.21606	3.55407	48.6948	2.29639e-07	0.000165023	3	7	Up-regulated
Sus_scrofa___IFI35	3.69455	0.737355	37.6059	2.91259e-07	0.000202421	3	7	Up-regulated
Sus_scrofa___SREBF2	1.4092	5.34019	46.6254	3.27107e-07	0.000206263	3	7	Up-regulated
Sus_scrofa___ENSSSCG00000039582	1.9509	5.56272	46.5193	3.33457e-07	0.000206263	3	7	Up-regulated
Sus_scrofa___AFF2	3.6454	3.61278	46.474	3.44353e-07	0.000206263	3	7	Up-regulated
Sus_scrofa___ZBP1	6.21771	1.367	42.4787	3.44898e-07	0.000206263	3	7	Up-regulated
Sus_scrofa___ENSSSCG00000032436	6.92637	2.8065	40.4442	3.46122e-07	0.000206263	3	7	Up-regulated
Sus_scrofa___TSPAN5	5.31719	4.86803	46.3439	3.56278e-07	0.00020726	3	7	Up-regulated
Sus_scrofa___ENSSSCG00000008898	3.74297	1.38932	41.7859	3.72899e-07	0.000211885	3	7	Up-regulated
Sus_scrofa___GM2A	3.10191	2.87733	45.8481	3.8795e-07	0.000212064	3	7	Up-regulated
Sus_scrofa___ENO1	1.48218	6.58115	45.5319	3.98903e-07	0.000212064	3	7	Up-regulated
Sus_scrofa___NOL3	2.0745	2.90101	45.7239	3.99252e-07	0.000212064	3	7	Up-regulated
Sus_scrofa___IFIT2	4.8292	5.65226	44.9271	4.53689e-07	0.000226224	3	7	Up-regulated
Sus_scrofa___MOSPD1	1.4542	5.5931	44.4455	4.87861e-07	0.000233592	3	7	Up-regulated
Sus_scrofa___FAM155B	3.51153	1.14358	39.3876	4.90301e-07	0.000233592	3	7	Up-regulated
Sus_scrofa___ERAP1	1.85359	3.58772	44.4247	4.97147e-07	0.000233592	3	7	Up-regulated
Sus_scrofa___IFIT1	4.87614	6.79602	44.3601	5.07405e-07	0.000233914	3	7	Up-regulated
Sus_scrofa___ENSSSCG00000025593	4.76213	2.50371	37.0396	5.3238e-07	0.000240882	3	7	Up-regulated
Sus_scrofa___LAT2	2.40298	2.7894	43.2449	6.32014e-07	0.000277795	3	7	Up-regulated
Sus_scrofa___RNF19B	2.50793	5.7641	43.0374	6.36702e-07	0.000277795	3	7	Up-regulated
Sus_scrofa___H1-3	3.43384	3.30099	42.4061	7.38366e-07	0.000305771	3	7	Up-regulated
Sus_scrofa___ENSSSCG00000017754	3.325	4.14751	42.105	7.85838e-07	0.000320006	3	7	Up-regulated
Sus_scrofa___FBXO39	2.34341	6.84103	41.5187	8.51833e-07	0.000341194	3	7	Up-regulated
Sus_scrofa___XPO6	1.24729	6.5114	41.3544	8.79538e-07	0.000346609	3	7	Up-regulated
Sus_scrofa___DNAJB9	1.9757	3.82079	40.8736	9.75986e-07	0.00037557	3	7	Up-regulated
Sus_scrofa___ENSSSCG00000001229	5.155	5.54181	41.4702	9.83771e-07	0.00037557	3	7	Up-regulated
Sus_scrofa___PARP14	4.57845	5.07503	38.5783	1.01258e-06	0.000378149	3	7	Up-regulated
Sus_scrofa___B2M	2.37153	6.85374	40.5931	1.02148e-06	0.000378149	3	7	Up-regulated
Sus_scrofa___STX11	1.94388	3.82655	40.1101	1.14398e-06	0.000417177	3	7	Up-regulated
Sus_scrofa___NMI	4.88334	2.15209	34.872	1.16149e-06	0.000417333	3	7	Up-regulated
Sus_scrofa___GSR	2.1736	5.88095	39.6652	1.22928e-06	0.000432435	3	7	Up-regulated
Sus_scrofa___ENSSSCG00000001398	4.06079	2.16228	34.6141	1.23892e-06	0.000432435	3	7	Up-regulated
Sus_scrofa___AKAP7	2.25984	6.53571	39.2142	1.3455e-06	0.000463024	3	7	Up-regulated
Sus_scrofa___EZR	1.88707	6.45881	38.9948	1.40661e-06	0.000468882	3	7	Up-regulated
Sus_scrofa___IFIT5	2.96552	5.04117	38.9015	1.43929e-06	0.000468882	3	7	Up-regulated
Sus_scrofa___AGPAT4	2.01433	4.01494	38.7331	1.49672e-06	0.000481175	3	7	Up-regulated
Sus_scrofa___ENSSSCG00000045769	3.86591	3.61291	38.6975	1.55703e-06	0.000494064	3	7	Up-regulated
Sus_scrofa___MLLT11	2.16464	4.44463	37.8549	1.78322e-06	0.000558583	3	7	Up-regulated
Sus_scrofa___MSN	2.00213	5.12807	37.6082	1.87267e-06	0.000572776	3	7	Up-regulated
Sus_scrofa___GHSR	4.47408	3.71147	37.6714	1.87542e-06	0.000572776	3	7	Up-regulated
Sus_scrofa___PLAAT3	1.50727	5.57988	37.4048	1.95041e-06	0.000587814	3	7	Up-regulated
Sus_scrofa___TRIM56	2.81022	2.76435	37.4556	1.98135e-06	0.000587814	3	7	Up-regulated
Sus_scrofa___POC1B	1.45379	3.86663	37.3203	1.99683e-06	0.000587814	3	7	Up-regulated
Sus_scrofa___TRIM22	4.93271	1.64448	34.4073	2.14671e-06	0.000617064	3	7	Up-regulated
Sus_scrofa___RSAD2	6.45028	7.23214	38.7468	2.58599e-06	0.000724054	3	7	Up-regulated
Papio_anubis_CAPZA2	5.93107	-0.240322	43.0705	2.61237e-06	0.000724054	3	7	Up-regulated
Sus_scrofa___MYORG	1.33092	6.16335	35.9546	2.64585e-06	0.000724054	3	7	Up-regulated
Sus_scrofa___CMPK2	5.47925	4.75544	38.2916	2.66708e-06	0.000724054	3	7	Up-regulated
Sus_scrofa___MTPN	1.67862	7.36497	35.5336	2.89451e-06	0.000777161	3	7	Up-regulated
Sus_scrofa___DDHD1	1.24247	6.59104	35.4778	2.92962e-06	0.000778037	3	7	Up-regulated
Sus_scrofa___CCL5	4.8563	4.77513	33.8554	3.07254e-06	0.000798631	3	7	Up-regulated
Sus_scrofa___HLCS	1.41305	6.27244	35.1689	3.13149e-06	0.000805385	3	7	Up-regulated
Sus_scrofa___ENSSSCG00000033010	2.4592	3.82939	34.9869	3.3039e-06	0.000840878	3	7	Up-regulated
Sus_scrofa___CDC14A	1.74492	8.2113	34.87	3.34011e-06	0.000841329	3	7	Up-regulated
Sus_scrofa___HPCAL1	1.51204	4.69573	34.7851	3.4094e-06	0.00085002	3	7	Up-regulated
Sus_scrofa___UCHL1	5.33916	0.202041	31.6409	3.62985e-06	0.000892144	3	7	Up-regulated
Sus_scrofa___ENSSSCG00000005768	1.18366	4.93306	34.4344	3.67651e-06	0.000892144	3	7	Up-regulated
Sus_scrofa___SPSB1	2.79803	5.04234	34.4297	3.6879e-06	0.000892144	3	7	Up-regulated
Sus_scrofa___AKR1D1	1.82516	4.7101	34.2356	3.84379e-06	0.000903033	3	7	Up-regulated
Sus_scrofa___SLC10A7	1.16551	6.8761	34.0292	4.01452e-06	0.000934161	3	7	Up-regulated
Papio_anubis_CDC14A	4.96473	0.336165	32.1082	4.20013e-06	0.000968131	3	7	Up-regulated
Sus_scrofa___H2BC21	2.72364	3.02826	33.8436	4.27094e-06	0.000975251	3	7	Up-regulated
Sus_scrofa___ZNFX1	2.6883	6.43372	33.6379	4.37984e-06	0.000990858	3	7	Up-regulated
Sus_scrofa___PSMB8	5.17109	2.4629	31.3343	4.65396e-06	0.00103373	3	7	Up-regulated
Sus_scrofa___DENND5B	0.981145	10.0743	33.2514	4.77e-06	0.00104528	3	7	Up-regulated
Sus_scrofa___LIMK1	1.63021	3.85947	33.2666	4.79299e-06	0.00104528	3	7	Up-regulated
Sus_scrofa___ENSSSCG00000036669	2.00039	6.86259	33.192	4.83429e-06	0.00104528	3	7	Up-regulated
Sus_scrofa___H2AC6	3.58522	3.31046	33.0575	5.10153e-06	0.00109338	3	7	Up-regulated
Sus_scrofa___ENSSSCG00000034610	3.02666	4.51683	32.6145	5.52598e-06	0.0011708	3	7	Up-regulated
Sus_scrofa___CCL4	4.51004	2.72086	28.995	5.61329e-06	0.0011708	3	7	Up-regulated
Sus_scrofa___ACBD3	1.08906	5.54612	32.5027	5.64691e-06	0.0011708	3	7	Up-regulated
Sus_scrofa___TIGD4	2.65392	0.789456	29.6637	5.65442e-06	0.0011708	3	7	Up-regulated
Sus_scrofa___H3-5	3.10425	7.10001	32.3985	5.78011e-06	0.00118677	3	7	Up-regulated
Sus_scrofa___MAP1A	2.80389	1.98733	30.7354	6.33267e-06	0.00126825	3	7	Up-regulated
Sus_scrofa___CDIN1	1.07451	7.33624	31.8654	6.52572e-06	0.00129628	3	7	Up-regulated
Sus_scrofa___UBD	5.29957	1.86151	27.2331	6.58468e-06	0.00129745	3	7	Up-regulated
Sus_scrofa___SCARB2	1.3975	6.30674	31.7651	6.6785e-06	0.00130541	3	7	Up-regulated
Sus_scrofa___KIF3C	1.44389	4.54596	31.7409	6.7342e-06	0.00130585	3	7	Up-regulated
Sus_scrofa___MOB3B	1.88303	5.12377	31.4478	7.2333e-06	0.00139158	3	7	Up-regulated
Sus_scrofa___APOBEC3B	2.42883	3.36838	31.3695	7.45609e-06	0.0014189	3	7	Up-regulated
Sus_scrofa___SP110	3.54841	3.74506	31.2726	7.60726e-06	0.00142975	3	7	Up-regulated
Sus_scrofa___OSGIN1	1.91984	4.4913	31.0939	7.8163e-06	0.00145016	3	7	Up-regulated
Sus_scrofa___PSMA6	1.01988	6.42384	31.0732	7.83455e-06	0.00145016	3	7	Up-regulated
Sus_scrofa___PLOD1	1.52194	4.05098	30.6906	8.60345e-06	0.00154874	3	7	Up-regulated
Sus_scrofa___SERGEF	1.37885	5.67512	30.6531	8.6433e-06	0.00154874	3	7	Up-regulated
Sus_scrofa___TFG	1.00956	5.68501	30.6446	8.66007e-06	0.00154874	3	7	Up-regulated
Sus_scrofa___SHFL	5.83993	1.02064	29.1053	8.84988e-06	0.00154874	3	7	Up-regulated
Sus_scrofa___RSRC1	0.967615	7.0602	30.5391	8.87422e-06	0.00154874	3	7	Up-regulated
Sus_scrofa___ZMAT3	2.083	3.90797	30.5339	8.95027e-06	0.00154875	3	7	Up-regulated
Papio_anubis_ARID1B	3.91481	0.462541	30.157	9.00103e-06	0.00154875	3	7	Up-regulated
Sus_scrofa___ENSSSCG00000005453	2.23267	3.73161	30.0281	1.01288e-05	0.00173061	3	7	Up-regulated
Sus_scrofa___TERF2IP	1.15696	5.09728	29.9126	1.02959e-05	0.00174255	3	7	Up-regulated
Sus_scrofa___OASL	3.39977	2.98803	28.436	1.04868e-05	0.00174255	3	7	Up-regulated
Sus_scrofa___VPS37C	1.30571	4.42577	29.8317	1.05083e-05	0.00174255	3	7	Up-regulated
Sus_scrofa___TRANK1	2.74051	6.26271	29.7554	1.06844e-05	0.00174255	3	7	Up-regulated
Sus_scrofa___NFATC2	1.65596	3.98533	29.7478	1.07512e-05	0.00174255	3	7	Up-regulated
Sus_scrofa___ISG12(A)	5.25552	6.20937	28.1321	1.08405e-05	0.00174255	3	7	Up-regulated
Sus_scrofa___ENSSSCG00000031661	2.5614	4.68135	29.5813	1.11644e-05	0.0017713	3	7	Up-regulated
Sus_scrofa___CDK2AP2	2.36606	0.604242	27.2598	1.12923e-05	0.00178003	3	7	Up-regulated
Sus_scrofa___PLEKHA4	2.75134	4.88896	29.5015	1.14315e-05	0.00178011	3	7	Up-regulated
Sus_scrofa___TKT	1.12695	4.86993	29.4732	1.14385e-05	0.00178011	3	7	Up-regulated
Sus_scrofa___BATF2	3.62624	1.07231	24.9261	1.2324e-05	0.00190577	3	7	Up-regulated
Sus_scrofa___NTN1	2.82396	3.00185	29.0866	1.28682e-05	0.00196732	3	7	Up-regulated
Sus_scrofa___NEMP2	1.6434	4.94461	28.9774	1.2883e-05	0.00196732	3	7	Up-regulated
Sus_scrofa___PROCA1	2.36185	2.44452	28.899	1.33433e-05	0.00202495	3	7	Up-regulated
Sus_scrofa___CCDC180	1.93184	6.30383	28.4009	1.48101e-05	0.00219307	3	7	Up-regulated
Sus_scrofa___TRAF3IP2	1.26851	6.95616	28.2734	1.52766e-05	0.00223505	3	7	Up-regulated
Sus_scrofa___ENSSSCG00000051689	3.00298	0.755134	25.8139	1.55634e-05	0.00226345	3	7	Up-regulated
Sus_scrofa___PLSCR1	2.19844	5.06535	28.0005	1.63621e-05	0.00231584	3	7	Up-regulated
Sus_scrofa___XKR9	2.67986	3.43285	28.04	1.63975e-05	0.00231584	3	7	Up-regulated
Sus_scrofa___MAGI1	1.77169	9.20658	27.9318	1.66134e-05	0.00233285	3	7	Up-regulated
Sus_scrofa___ABCG2	1.63992	5.13722	27.7503	1.73872e-05	0.00241375	3	7	Up-regulated
Sus_scrofa___SLC24A3	2.24203	4.21678	27.7035	1.76598e-05	0.00241572	3	7	Up-regulated
Sus_scrofa___CAMTA1	0.927746	7.68352	27.3726	1.90853e-05	0.00256215	3	7	Up-regulated
Sus_scrofa___SH3RF2	2.37206	5.46776	27.2137	1.98774e-05	0.00263765	3	7	Up-regulated
Sus_scrofa___GDAP2	1.37284	6.10775	27.2009	1.99258e-05	0.00263765	3	7	Up-regulated
Sus_scrofa___LRP2	2.51103	4.61211	27.1678	2.01418e-05	0.00263765	3	7	Up-regulated
Sus_scrofa___SDR42E1	2.0115	1.40971	26.6677	2.02236e-05	0.00263765	3	7	Up-regulated
Sus_scrofa___STAMBP	1.06102	5.25312	27.1288	2.02954e-05	0.00263765	3	7	Up-regulated
Sus_scrofa___SESN2	2.74486	2.8348	26.8533	2.05366e-05	0.00265488	3	7	Up-regulated
Sus_scrofa___LGALS3BP	4.16844	2.9613	25.3333	2.07275e-05	0.00266545	3	7	Up-regulated
Sus_scrofa___KHNYN	1.78995	3.13041	26.6793	2.30654e-05	0.00293519	3	7	Up-regulated
Sus_scrofa___VPS26C	1.06281	5.97932	26.4694	2.39604e-05	0.00301765	3	7	Up-regulated
Sus_scrofa___ENSSSCG00000042730	3.26644	-0.0247992	23.0024	2.41262e-05	0.00301788	3	7	Up-regulated
Sus_scrofa___ENSSSCG00000025631	1.70392	2.83967	26.4962	2.42092e-05	0.00301788	3	7	Up-regulated
Sus_scrofa___ASAP1	0.950116	8.01054	26.2764	2.51618e-05	0.00309785	3	7	Up-regulated
Sus_scrofa___SLC37A2	2.28185	2.54411	26.2889	2.54823e-05	0.00311304	3	7	Up-regulated
Sus_scrofa___DUSP4	3.16703	2.4218	24.6846	2.58104e-05	0.00312191	3	7	Up-regulated
Sus_scrofa___ENSSSCG00000035669	3.03131	1.48813	23.6005	2.69521e-05	0.00324395	3	7	Up-regulated
Sus_scrofa___ALAD	1.51243	4.0179	25.9702	2.73185e-05	0.00327193	3	7	Up-regulated
Sus_scrofa___DHDH	1.45578	3.83213	25.8783	2.80042e-05	0.00332149	3	7	Up-regulated
Sus_scrofa___EPN3	3.07007	-0.0430842	21.9471	2.86199e-05	0.00337812	3	7	Up-regulated
Sus_scrofa___RHBDD1	1.42854	5.49235	25.738	2.88982e-05	0.00339456	3	7	Up-regulated
Sus_scrofa___SH3PXD2A	1.37621	6.89562	25.6064	2.98865e-05	0.00349157	3	7	Up-regulated
Sus_scrofa___MOV10	2.6484	4.3581	25.5811	3.02463e-05	0.0035024	3	7	Up-regulated
Sus_scrofa___IGF2BP2	1.37251	7.18838	25.5208	3.05556e-05	0.00352154	3	7	Up-regulated
Sus_scrofa___ARPC2	1.12656	5.93888	25.3393	3.20343e-05	0.00365643	3	7	Up-regulated
Sus_scrofa___GCLM	1.46458	4.28154	25.3317	3.2175e-05	0.00365643	3	7	Up-regulated
Sus_scrofa___S100Z	4.9753	-0.299986	26.4394	3.3128e-05	0.00371918	3	7	Up-regulated
Sus_scrofa___CHMP4B	1.18208	6.6574	25.2034	3.31839e-05	0.00371918	3	7	Up-regulated
Papio_anubis_PAPOLA	3.87117	-0.134979	26.2013	3.46375e-05	0.00382946	3	7	Up-regulated
Sus_scrofa___UVRAG	1.01558	8.54126	25.0388	3.4638e-05	0.00382946	3	7	Up-regulated
Sus_scrofa___C3orf38	1.3101	5.26081	24.9828	3.51684e-05	0.00387058	3	7	Up-regulated
Sus_scrofa___HMGCR	1.34761	2.98015	24.9968	3.53765e-05	0.00387603	3	7	Up-regulated
Papio_anubis_ARID4B	3.43293	0.246962	21.6499	3.72722e-05	0.00401375	3	7	Up-regulated
Sus_scrofa___LIG4	1.6405	1.99034	24.6854	3.81878e-05	0.00409229	3	7	Up-regulated
Sus_scrofa___ENSSSCG00000039071	2.89906	1.26317	22.7444	3.96334e-05	0.00419204	3	7	Up-regulated
Sus_scrofa___UHMK1	1.2695	3.97131	24.5215	3.98098e-05	0.00419256	3	7	Up-regulated
Sus_scrofa___IRF7	3.27974	2.65149	23.4803	4.10584e-05	0.00430549	3	7	Up-regulated
Sus_scrofa___ENSSSCG00000011559	1.1022	4.75977	24.3358	4.17271e-05	0.00435691	3	7	Up-regulated
Sus_scrofa___MTX3	1.13786	4.04672	24.3243	4.19397e-05	0.00436048	3	7	Up-regulated
Sus_scrofa___ENSSSCG00000017146	3.03674	7.50971	24.268	4.24538e-05	0.00439523	3	7	Up-regulated
Sus_scrofa___SNX21	1.74185	4.24933	24.2276	4.30222e-05	0.00441258	3	7	Up-regulated
Sus_scrofa___ZNF710	1.0079	5.41419	24.2122	4.30982e-05	0.00441258	3	7	Up-regulated
Sus_scrofa___GRINA	2.72105	0.269622	21.4692	4.31632e-05	0.00441258	3	7	Up-regulated
Sus_scrofa___TRIM26	2.27238	4.33993	24.0482	4.52567e-05	0.00458821	3	7	Up-regulated
Sus_scrofa___ENSSSCG00000007554	1.77691	3.03412	23.9481	4.68136e-05	0.00469932	3	7	Up-regulated
Sus_scrofa___LZTS1	1.60068	5.42189	23.894	4.69297e-05	0.00469932	3	7	Up-regulated
Sus_scrofa___ZC3HAV1	2.88916	6.12927	23.7992	4.81368e-05	0.00480052	3	7	Up-regulated
Sus_scrofa___HIVEP1	0.946072	6.53439	23.743	4.88495e-05	0.00485178	3	7	Up-regulated
Sus_scrofa___PHC3	1.05685	8.27469	23.688	4.95742e-05	0.0048877	3	7	Up-regulated
Sus_scrofa___RIN3	1.63582	5.64338	23.6867	4.96111e-05	0.0048877	3	7	Up-regulated
Sus_scrofa___CREB3L2	1.1629	6.60849	23.65	5.00892e-05	0.00491057	3	7	Up-regulated
Sus_scrofa___MSMO1	1.97907	2.60909	23.6923	5.02453e-05	0.00491057	3	7	Up-regulated
Sus_scrofa___IFFO2	2.15765	1.78519	23.2866	5.15151e-05	0.00501462	3	7	Up-regulated
Sus_scrofa___S100A11	3.50271	1.3938	20.9714	5.2462e-05	0.0050643	3	7	Up-regulated
Sus_scrofa___ENSSSCG00000031163	4.13767	1.19941	20.5349	5.26974e-05	0.0050643	3	7	Up-regulated
Sus_scrofa___PFKP	1.40212	3.956	23.456	5.29639e-05	0.0050643	3	7	Up-regulated
Sus_scrofa___MGMT	1.65276	7.12488	23.4363	5.30618e-05	0.0050643	3	7	Up-regulated
Sus_scrofa___ACCSL	0.9481	5.88185	23.3941	5.36798e-05	0.00510334	3	7	Up-regulated
Sus_scrofa___S100A6	4.13061	0.57772	20.7334	5.6332e-05	0.00533472	3	7	Up-regulated
Sus_scrofa___NPC2	1.88808	1.84128	23.1463	5.66975e-05	0.00534861	3	7	Up-regulated
Sus_scrofa___PSMD4	0.876534	5.13774	22.9491	6.0614e-05	0.00563111	3	7	Up-regulated
Sus_scrofa___ETV5	2.8676	2.59532	22.6644	6.36894e-05	0.00589441	3	7	Up-regulated
Sus_scrofa___CEP112	1.25108	6.33711	22.6485	6.5803e-05	0.00604765	3	7	Up-regulated
Sus_scrofa___ETV3	1.76069	3.77456	22.656	6.59803e-05	0.00604765	3	7	Up-regulated
Sus_scrofa___CTSD	1.41459	4.38609	22.6313	6.62022e-05	0.00604765	3	7	Up-regulated
Sus_scrofa___DDX60	4.03846	6.656	22.6428	6.63353e-05	0.00604765	3	7	Up-regulated
Sus_scrofa___ABL2	1.02109	7.49246	22.503	6.8494e-05	0.00615833	3	7	Up-regulated
Sus_scrofa___ICAM1	4.19587	0.904548	19.6245	6.93809e-05	0.00618719	3	7	Up-regulated
Sus_scrofa___SRRM3	1.75375	2.73981	22.5122	6.93853e-05	0.00618719	3	7	Up-regulated
Sus_scrofa___SQLE	1.62669	5.00136	22.3901	7.07152e-05	0.00627208	3	7	Up-regulated
Sus_scrofa___ENSSSCG00000013366	1.40447	4.27011	22.4128	7.08507e-05	0.00627208	3	7	Up-regulated
Sus_scrofa___NIBAN2	1.82808	3.62448	22.3826	7.12749e-05	0.00628686	3	7	Up-regulated
Sus_scrofa___RGS1	3.94755	-0.1238	19.7678	7.1898e-05	0.00631901	3	7	Up-regulated
Sus_scrofa___PTP4A1	1.48674	5.13793	22.0191	7.83863e-05	0.00670897	3	7	Up-regulated
Sus_scrofa___RESF1	1.2482	5.79324	21.9706	7.94397e-05	0.00676289	3	7	Up-regulated
Sus_scrofa___ADCY9	0.959798	6.72694	21.9201	8.05544e-05	0.00683398	3	7	Up-regulated
Sus_scrofa___SLC33A1	0.858151	5.88686	21.8779	8.15219e-05	0.00684291	3	7	Up-regulated
Papio_anubis_U5-10	3.09404	0.0377282	19.4186	8.17824e-05	0.00684291	3	7	Up-regulated
Sus_scrofa___IGF2BP3	1.0466	6.85255	21.854	8.206e-05	0.00684291	3	7	Up-regulated
Sus_scrofa___TLL2	1.72801	4.66485	21.8079	8.32646e-05	0.00691974	3	7	Up-regulated
Sus_scrofa___FKBP5	1.52303	8.84837	21.7717	8.39742e-05	0.00693838	3	7	Up-regulated
Papio_anubis_ENSPANG00000025744	3.49804	-0.195418	21.4777	8.40568e-05	0.00693838	3	7	Up-regulated
Sus_scrofa___CXCL11	4.24833	1.51703	19.7173	8.43814e-05	0.00694172	3	7	Up-regulated
Sus_scrofa___LIN54	0.86846	5.7051	21.7367	8.48232e-05	0.00695465	3	7	Up-regulated
Sus_scrofa___ADM	3.05043	1.58674	19.8008	9.02503e-05	0.00721286	3	7	Up-regulated
Sus_scrofa___PARP9	3.16001	4.34702	21.5394	9.09199e-05	0.00721286	3	7	Up-regulated
Sus_scrofa___TUFT1	2.08306	2.41164	21.5126	9.12284e-05	0.00721286	3	7	Up-regulated
Sus_scrofa___IRF2	1.37896	6.96156	21.4676	9.1495e-05	0.00721286	3	7	Up-regulated
Sus_scrofa___CMAS	1.59093	4.64582	21.4594	9.18201e-05	0.00721286	3	7	Up-regulated
Sus_scrofa___PSMD14	0.985482	6.79389	21.4483	9.19996e-05	0.00721286	3	7	Up-regulated
Sus_scrofa___DNASE1L1	1.48554	2.91174	21.4912	9.20534e-05	0.00721286	3	7	Up-regulated
Sus_scrofa___CYBRD1	2.92562	2.07092	21.3302	9.21055e-05	0.00721286	3	7	Up-regulated
Sus_scrofa___SOGA1	1.09189	4.31543	21.4371	9.24205e-05	0.00721441	3	7	Up-regulated
Sus_scrofa___DTX3L	3.51861	4.00683	21.4504	9.33139e-05	0.00726095	3	7	Up-regulated
Sus_scrofa___TMEM181	1.0201	3.91143	21.3802	9.40273e-05	0.00729324	3	7	Up-regulated
Sus_scrofa___MDM2	1.18658	6.42047	21.2862	9.63289e-05	0.00744812	3	7	Up-regulated
Papio_anubis_NFIA	2.75231	-0.17095	19.4801	9.83782e-05	0.00755872	3	7	Up-regulated
Sus_scrofa___POPDC2	1.20425	6.18681	21.1954	9.88546e-05	0.00757152	3	7	Up-regulated
Sus_scrofa___ISG15	4.57492	6.7941	20.9934	0.000100284	0.00760946	3	7	Up-regulated
Sus_scrofa___G6PD	1.85019	2.49841	21.0891	0.000103335	0.0077686	3	7	Up-regulated
Sus_scrofa___COPZ2	1.48197	2.77368	20.7695	0.000112956	0.00835477	3	7	Up-regulated
Sus_scrofa___PRXL2A	4.1556	-0.411956	19.3732	0.000113767	0.00837247	3	7	Up-regulated
Sus_scrofa___ANKRD37	2.10566	2.50658	20.4535	0.000115388	0.00839406	3	7	Up-regulated
Sus_scrofa___UBA7	3.57715	0.687228	19.3054	0.000115525	0.00839406	3	7	Up-regulated
Sus_scrofa___ENSSSCG00000049674	2.83775	2.28706	19.3996	0.000115684	0.00839406	3	7	Up-regulated
Sus_scrofa___BLVRB	1.86252	2.75205	20.6617	0.000115778	0.00839406	3	7	Up-regulated
Sus_scrofa___PXDN	2.00871	4.08296	20.6408	0.000116238	0.00839603	3	7	Up-regulated
Papio_anubis_MED13	3.19282	0.0724755	18.899	0.000119375	0.00850228	3	7	Up-regulated
Sus_scrofa___PRRG3	2.87223	0.134476	18.383	0.000119522	0.00850228	3	7	Up-regulated
Sus_scrofa___PSMF1	1.20663	7.16845	20.528	0.000119706	0.00850228	3	7	Up-regulated
Sus_scrofa___COL16A1	2.5895	2.43319	20.5048	0.000121088	0.00854599	3	7	Up-regulated
Sus_scrofa___PSMD3	0.997322	4.8137	20.423	0.000123475	0.0086443	3	7	Up-regulated
Sus_scrofa___NCK2	0.805138	5.97017	20.3209	0.000127127	0.00884929	3	7	Up-regulated
Sus_scrofa___DYNC1H1	0.929736	6.12685	20.3071	0.000127638	0.00885958	3	7	Up-regulated
Sus_scrofa___TRIM21	2.66603	4.147	20.3107	0.000128174	0.00887161	3	7	Up-regulated
Sus_scrofa___ENSSSCG00000014280	1.53318	7.96774	20.2774	0.000128728	0.00888477	3	7	Up-regulated
Sus_scrofa___CCDC3	2.0702	3.24245	20.2405	0.000131594	0.009057	3	7	Up-regulated
Sus_scrofa___SPG21	1.17302	3.39518	20.083	0.000137041	0.0093731	3	7	Up-regulated
Sus_scrofa___ADAR	1.79217	5.68207	19.9602	0.000141254	0.00951317	3	7	Up-regulated
Sus_scrofa___ATF5	2.30525	2.66799	20.0054	0.000141337	0.00951317	3	7	Up-regulated
Sus_scrofa___PSMD11	0.969906	5.6189	19.935	0.0001423	0.00955171	3	7	Up-regulated
Sus_scrofa___FBN2	2.59325	7.21865	19.8149	0.000147386	0.00986599	3	7	Up-regulated
Sus_scrofa___ENSSSCG00000006324	1.39585	3.57296	19.8201	0.000148113	0.00988755	3	7	Up-regulated
Sus_scrofa___SLC16A3	2.3216	1.85949	19.3733	0.000148799	0.00990625	3	7	Up-regulated
Sus_scrofa___TRIM38	4.63074	-0.0232641	20.913	0.000152969	0.0100741	3	7	Up-regulated
Sus_scrofa___EIF2AK3	0.810153	6.74917	19.6719	0.000153721	0.0100964	3	7	Up-regulated
Papio_anubis_PPP4R2	4.78698	-0.583181	22.1113	0.000156428	0.0102466	3	7	Up-regulated
Sus_scrofa___SSR3	1.21269	5.65548	19.5171	0.000160954	0.010459	3	7	Up-regulated
Sus_scrofa___TM2D3	0.845386	5.36126	19.4025	0.000166525	0.0106837	3	7	Up-regulated
Sus_scrofa___C9orf40	1.38158	2.82971	19.4415	0.000166598	0.0106837	3	7	Up-regulated
Sus_scrofa___HEBP1	1.94704	2.37238	19.3774	0.000169065	0.0108135	3	7	Up-regulated
Sus_scrofa___F2RL1	2.70453	1.82289	18.888	0.000169678	0.0108244	3	7	Up-regulated
Sus_scrofa___CCDC15	0.94867	5.17786	19.2992	0.000171736	0.0109272	3	7	Up-regulated
Sus_scrofa___ENSSSCG00000022322	1.32061	6.08443	19.2838	0.000172482	0.0109461	3	7	Up-regulated
Sus_scrofa___FUT11	1.3547	2.69349	19.2601	0.00017586	0.0110742	3	7	Up-regulated
Sus_scrofa___MAPRE3	1.0886	5.45855	19.1746	0.000178221	0.011194	3	7	Up-regulated
Sus_scrofa___MMP25	2.82177	3.06708	19.0866	0.000181156	0.0113492	3	7	Up-regulated
Sus_scrofa___BNIP3	1.21033	5.54019	18.948	0.000190756	0.0117642	3	7	Up-regulated
Papio_anubis_NIPBL	2.45292	1.2356	17.9686	0.000191151	0.0117642	3	7	Up-regulated
Papio_anubis_USP34	4.40764	-0.154523	21.7295	0.000193719	0.0118673	3	7	Up-regulated
Sus_scrofa___SAP30L	1.30493	4.16375	18.8978	0.000193998	0.0118673	3	7	Up-regulated
Sus_scrofa___PARVA	0.839936	7.53737	18.8859	0.000194282	0.0118673	3	7	Up-regulated
Sus_scrofa___F2	2.24799	2.90594	18.8792	0.000197085	0.0120084	3	7	Up-regulated
Sus_scrofa___TOR1AIP2	1.1336	3.33151	18.7814	0.000201665	0.0121908	3	7	Up-regulated
Sus_scrofa___PSMA5	0.97987	4.53525	18.6491	0.000208865	0.0125011	3	7	Up-regulated
Sus_scrofa___RUSF1	0.995844	3.55837	18.6527	0.000209264	0.0125011	3	7	Up-regulated
Sus_scrofa___MOSPD2	0.960263	4.62733	18.6071	0.000211486	0.012603	3	7	Up-regulated
Sus_scrofa___GOLGB1	0.710148	7.11442	18.5896	0.00021247	0.0126308	3	7	Up-regulated
Sus_scrofa___RBM25	0.82036	7.67053	18.5663	0.000213969	0.0126367	3	7	Up-regulated
Sus_scrofa___LRIG2	0.78304	7.22584	18.5499	0.000215038	0.0126367	3	7	Up-regulated
Sus_scrofa___PCYOX1	1.35164	5.28763	18.5492	0.000215155	0.0126367	3	7	Up-regulated
Sus_scrofa___RNF152	1.69144	5.5612	18.4175	0.000223913	0.0130121	3	7	Up-regulated
Sus_scrofa___PEA15	1.08229	4.45492	18.4201	0.000223928	0.0130121	3	7	Up-regulated
Sus_scrofa___PYGO1	1.492	2.52203	18.4223	0.000226414	0.0130471	3	7	Up-regulated
Sus_scrofa___EIF4EBP1	1.50748	3.76277	18.3861	0.000226997	0.0130499	3	7	Up-regulated
Sus_scrofa___ENSSSCG00000036469	2.55412	0.623464	17.0025	0.000229319	0.013108	3	7	Up-regulated
Sus_scrofa___ACTG2	2.12609	0.779091	17.4113	0.000229617	0.013108	3	7	Up-regulated
Sus_scrofa___TMEM203	1.6635	0.619351	17.4572	0.000230254	0.013109	3	7	Up-regulated
Sus_scrofa___TSKU	2.06037	0.259378	16.7716	0.000235787	0.0132799	3	7	Up-regulated
Sus_scrofa___STAT1	2.57969	7.86295	18.2437	0.000236058	0.0132799	3	7	Up-regulated
Sus_scrofa___H2AC20	2.12631	1.31228	17.9562	0.000236432	0.0132799	3	7	Up-regulated
Sus_scrofa___TNNC2	2.35486	0.144766	16.7101	0.000237354	0.0132992	3	7	Up-regulated
Sus_scrofa___ZNHIT2	3.37574	-0.391028	16.6228	0.000237865	0.0132992	3	7	Up-regulated
Sus_scrofa___HMOX2	1.16515	6.90756	18.203	0.000239017	0.0133226	3	7	Up-regulated
Sus_scrofa___UFM1	0.806745	5.23931	18.1845	0.000240444	0.0133226	3	7	Up-regulated
Sus_scrofa___SLC39A11	0.787514	6.10327	18.1835	0.000240465	0.0133226	3	7	Up-regulated
Sus_scrofa___PSMB9	2.61574	2.8528	17.8009	0.000243711	0.0134164	3	7	Up-regulated
Sus_scrofa___ENSSSCG00000010401	0.972312	4.80597	18.1375	0.000243999	0.0134164	3	7	Up-regulated
Sus_scrofa___ENSSSCG00000043893	1.91036	4.02139	18.1396	0.000244353	0.0134164	3	7	Up-regulated
Sus_scrofa___ENSSSCG00000033720	1.906	2.37222	18.0352	0.000250053	0.0136932	3	7	Up-regulated
Sus_scrofa___CSF1	1.76285	2.41516	18.0985	0.000250516	0.0136932	3	7	Up-regulated
Sus_scrofa___ENDOV	1.45067	4.83123	18.0239	0.000252747	0.0137843	3	7	Up-regulated
Sus_scrofa___C16orf72	0.707309	6.1867	17.999	0.000254462	0.0138329	3	7	Up-regulated
Sus_scrofa___SGK1	2.70606	1.80758	17.4828	0.00025477	0.0138329	3	7	Up-regulated
Papio_anubis_MYL2	3.34753	-0.173162	15.8548	0.000258272	0.0139302	3	7	Up-regulated
Sus_scrofa___RAD23B	0.852744	6.90803	17.9388	0.000259213	0.0139501	3	7	Up-regulated
Sus_scrofa___TTC39C	1.65891	1.65321	17.7604	0.000262776	0.0140799	3	7	Up-regulated
Sus_scrofa___SERP2	1.01365	4.18315	17.8704	0.000265117	0.0141742	3	7	Up-regulated
Sus_scrofa___HECTD4	1.01879	8.86193	17.7647	0.000273517	0.0144544	3	7	Up-regulated
Sus_scrofa___RILPL2	1.01609	4.31684	17.7644	0.000273907	0.0144544	3	7	Up-regulated
Sus_scrofa___ENSSSCG00000015390	2.15457	0.117715	16.0746	0.000277287	0.0145539	3	7	Up-regulated
Sus_scrofa___DDC	2.05581	1.54658	17.6017	0.000278518	0.0145539	3	7	Up-regulated
Sus_scrofa___ZNF22	1.10764	3.1975	17.7246	0.000278609	0.0145539	3	7	Up-regulated
Sus_scrofa___ZNF664	0.656499	7.67163	17.575	0.000290095	0.0150044	3	7	Up-regulated
Sus_scrofa___ENSSSCG00000022794	2.09382	1.32998	17.1645	0.000290471	0.0150044	3	7	Up-regulated
Sus_scrofa___SOCS6	0.918586	4.66097	17.562	0.000291451	0.0150123	3	7	Up-regulated
Sus_scrofa___LRP3	1.949	1.32908	17.3649	0.000292447	0.0150123	3	7	Up-regulated
Sus_scrofa___SHISA5	2.27301	3.04884	17.5905	0.000292468	0.0150123	3	7	Up-regulated
Sus_scrofa___LYN	1.42361	2.59907	17.5717	0.000294464	0.0150279	3	7	Up-regulated
Sus_scrofa___ARAP2	2.72032	2.55544	17.3912	0.000294616	0.0150279	3	7	Up-regulated
Sus_scrofa___MAFG	1.30461	3.04399	17.5349	0.0002959	0.0150306	3	7	Up-regulated
Sus_scrofa___PANX1	2.6916	2.28944	17.1177	0.000297184	0.0150645	3	7	Up-regulated
Sus_scrofa___ITPR2	0.803419	8.98507	17.4574	0.000300907	0.0152204	3	7	Up-regulated
Sus_scrofa___ARRDC2	2.05501	2.64251	17.4245	0.000303915	0.0153104	3	7	Up-regulated
Sus_scrofa___NLRC5	2.58502	6.79825	17.3862	0.000307883	0.0154165	3	7	Up-regulated
Sus_scrofa___ATP6V1G1	0.939333	3.82326	17.3863	0.000308338	0.0154165	3	7	Up-regulated
Sus_scrofa___NANS	0.759242	5.81328	17.3489	0.000311319	0.0154831	3	7	Up-regulated
Sus_scrofa___ENSSSCG00000006777	3.01153	1.33825	16.6656	0.000311958	0.0154831	3	7	Up-regulated
Sus_scrofa___YWHAB	1.04352	4.97044	17.3388	0.000312413	0.0154831	3	7	Up-regulated
Sus_scrofa___CTSH	1.50275	4.06835	17.3224	0.000315129	0.0155861	3	7	Up-regulated
Sus_scrofa___TTC39A	1.63661	4.16453	17.2881	0.000317982	0.0156955	3	7	Up-regulated
Sus_scrofa___ZDHHC18	0.888834	4.18865	17.2463	0.00032187	0.0157434	3	7	Up-regulated
Papio_anubis_EEA1	2.01405	1.63028	16.9495	0.000322575	0.0157434	3	7	Up-regulated
Sus_scrofa___KHDRBS1	0.710614	6.83716	17.2299	0.000323105	0.0157434	3	7	Up-regulated
Sus_scrofa___GCA	2.06296	1.46046	16.4304	0.000324929	0.0157434	3	7	Up-regulated
Sus_scrofa___CNN3	2.93516	2.43428	17.058	0.000326379	0.0157434	3	7	Up-regulated
Papio_anubis_UBR5	3.77717	-0.511171	17.7822	0.000327529	0.0157434	3	7	Up-regulated
Sus_scrofa___ENSSSCG00000001396	3.04813	0.42714	15.4629	0.000328225	0.0157434	3	7	Up-regulated
Sus_scrofa___ABHD4	1.37684	6.15838	17.1739	0.000328863	0.0157434	3	7	Up-regulated
Sus_scrofa___STN1	1.09136	5.14557	17.1645	0.00032991	0.0157434	3	7	Up-regulated
Sus_scrofa___EIF4E3	0.775141	5.97363	17.1612	0.000330175	0.0157434	3	7	Up-regulated
Sus_scrofa___GPATCH2	0.762047	6.85747	17.155	0.000330796	0.0157434	3	7	Up-regulated
Sus_scrofa___XKRX	1.91109	3.69005	17.1674	0.000331032	0.0157434	3	7	Up-regulated
Sus_scrofa___PML	2.51042	6.19082	17.1395	0.000332484	0.0157434	3	7	Up-regulated
Sus_scrofa___ARL8A	1.17255	3.78185	17.0942	0.000338176	0.015894	3	7	Up-regulated
Sus_scrofa___ENSSSCG00000010448	1.1324	4.92503	17.084	0.000338412	0.015894	3	7	Up-regulated
Sus_scrofa___CEBPG	1.07258	4.05951	17.0823	0.000338918	0.015894	3	7	Up-regulated
Sus_scrofa___MORC3	1.23126	6.0409	17.0289	0.00034422	0.0161118	3	7	Up-regulated
Sus_scrofa___PSMD7	0.900832	4.85964	17.015	0.000345871	0.0161351	3	7	Up-regulated
Sus_scrofa___B3GNT5	1.42354	2.71069	17.0456	0.000346039	0.0161351	3	7	Up-regulated
Sus_scrofa___AHR	1.12872	5.73102	17.0026	0.000347109	0.0161541	3	7	Up-regulated
Papio_anubis_DDX17	2.84683	-0.144503	15.6618	0.000354983	0.0164267	3	7	Up-regulated
Sus_scrofa___SLC5A4	1.68685	3.27013	16.9111	0.000359517	0.016564	3	7	Up-regulated
Papio_anubis_FOXJ3	2.74966	2.44951	16.8297	0.000359983	0.016564	3	7	Up-regulated
Sus_scrofa___TTC9	3.01923	1.49634	15.8075	0.000362435	0.0166454	3	7	Up-regulated
Sus_scrofa___ARPC5	1.39601	4.32553	16.8336	0.000366605	0.0167425	3	7	Up-regulated
Sus_scrofa___GOLT1B	1.45205	2.51475	16.804	0.00037373	0.0169413	3	7	Up-regulated
Sus_scrofa___HMGA1	1.98796	1.98841	16.7104	0.000376789	0.0169759	3	7	Up-regulated
Sus_scrofa___ZNF697	1.10997	5.08732	16.7407	0.000377193	0.0169759	3	7	Up-regulated
Sus_scrofa___DAD1	0.921161	4.26945	16.7231	0.00037957	0.0170064	3	7	Up-regulated
Sus_scrofa___PACSIN3	1.20476	5.13971	16.7153	0.000380242	0.0170064	3	7	Up-regulated
Sus_scrofa___PSMA4	0.944107	4.24099	16.7114	0.000381088	0.0170064	3	7	Up-regulated
Sus_scrofa___PAFAH2	1.07771	5.18293	16.7054	0.000381432	0.0170064	3	7	Up-regulated
Sus_scrofa___ENSSSCG00000012566	0.780371	5.2146	16.6404	0.000389389	0.0172981	3	7	Up-regulated
Sus_scrofa___ZFP36L2	2.95999	3.22947	16.626	0.000391352	0.0173537	3	7	Up-regulated
Sus_scrofa___RIPOR1	0.797445	4.72495	16.6032	0.000394154	0.0173861	3	7	Up-regulated
Sus_scrofa___STX18	0.788345	6.24517	16.5941	0.000395096	0.0173935	3	7	Up-regulated
Sus_scrofa___MEGF9	1.04665	4.00751	16.5914	0.000396077	0.0174053	3	7	Up-regulated
Sus_scrofa___SLC31A2	1.80319	1.71934	16.5034	0.000400138	0.0174894	3	7	Up-regulated
Sus_scrofa___ENSSSCG00000016791	2.68088	0.753043	15.6242	0.000403244	0.0175449	3	7	Up-regulated
Sus_scrofa___ENSSSCG00000023324	0.769277	7.40121	16.5275	0.000403562	0.0175449	3	7	Up-regulated
Sus_scrofa___YBX2	2.17604	1.53011	16.1441	0.000419524	0.018078	3	7	Up-regulated
Papio_anubis_PPP2R5E	2.79274	0.356044	14.8478	0.000426193	0.0183008	3	7	Up-regulated
Sus_scrofa___SAMD9	3.25628	1.53035	14.9877	0.000430714	0.018398	3	7	Up-regulated
Sus_scrofa___ADGRB1	1.64572	2.89223	16.3361	0.000432426	0.0184067	3	7	Up-regulated
Sus_scrofa___EGFR	2.32893	0.901235	15.4881	0.00043621	0.0185011	3	7	Up-regulated
Papio_anubis_ENSPANG00000011173	4.91211	-0.814263	16.7018	0.000438994	0.0185405	3	7	Up-regulated
Sus_scrofa___PSMB2	0.8687	7.14447	16.2449	0.000441853	0.0186134	3	7	Up-regulated
Sus_scrofa___PROM1	2.66578	1.80079	15.7521	0.000454966	0.0190311	3	7	Up-regulated
Sus_scrofa___ENSSSCG00000007735	0.853259	6.7695	16.1476	0.00045593	0.0190311	3	7	Up-regulated
Sus_scrofa___ARHGAP31	1.08343	6.40315	16.139	0.000457219	0.0190311	3	7	Up-regulated
Sus_scrofa___ZDHHC14	2.58784	5.78735	16.0926	0.000464696	0.0192918	3	7	Up-regulated
Sus_scrofa___TRIOBP	1.22633	4.39504	16.0583	0.000469876	0.0193591	3	7	Up-regulated
Papio_anubis_ENSPANG00000008041	3.06765	0.770188	14.5937	0.000475446	0.0194257	3	7	Up-regulated
Sus_scrofa___ENSSSCG00000014997	3.30026	2.81269	15.7071	0.000476957	0.0194286	3	7	Up-regulated
Sus_scrofa___NFE2L1	1.04249	5.43901	15.9923	0.000479493	0.0194286	3	7	Up-regulated
Sus_scrofa___GPNMB	1.34895	4.40529	15.9835	0.00048126	0.0194629	3	7	Up-regulated
Sus_scrofa___SGSH	3.58715	-0.356914	15.4904	0.00048419	0.0194629	3	7	Up-regulated
Sus_scrofa___CEP44	1.31718	3.64147	15.9685	0.000484644	0.0194629	3	7	Up-regulated
Sus_scrofa___LIPA	1.82309	6.70648	15.959	0.000484645	0.0194629	3	7	Up-regulated
Sus_scrofa___LSM6	0.974847	4.62603	15.9577	0.00048512	0.0194629	3	7	Up-regulated
Sus_scrofa___KDM4C	0.690493	8.39931	15.9447	0.000486855	0.0194648	3	7	Up-regulated
Sus_scrofa___DDB1	0.792086	5.30164	15.941	0.000487557	0.0194648	3	7	Up-regulated
Sus_scrofa___ENSSSCG00000045560	1.24481	4.92943	15.9066	0.000493121	0.0196228	3	7	Up-regulated
Sus_scrofa___CCDC167	1.19017	2.7035	15.868	0.000503308	0.0198427	3	7	Up-regulated
Sus_scrofa___ATL3	1.04821	4.76465	15.8405	0.000503904	0.0198427	3	7	Up-regulated
Sus_scrofa___FUNDC1	1.6685	3.86958	15.8432	0.000504331	0.0198427	3	7	Up-regulated
Sus_scrofa___HHAT	1.3076	4.06163	15.8118	0.000509185	0.0199949	3	7	Up-regulated
Sus_scrofa___ATP6V0D1	0.863223	4.20859	15.8061	0.000509836	0.0199949	3	7	Up-regulated
Sus_scrofa___KLHL42	1.3075	3.86658	15.7224	0.000524595	0.0204661	3	7	Up-regulated
Sus_scrofa___SLC12A6	0.911671	7.06417	15.6977	0.00052765	0.0204998	3	7	Up-regulated
Sus_scrofa___DCAF7	0.826922	4.28767	15.6746	0.00053214	0.020605	3	7	Up-regulated
Papio_anubis_HNRNPU	2.36385	0.212355	14.3876	0.000544999	0.0210031	3	7	Up-regulated
Sus_scrofa___CASK	0.996549	6.14971	15.5773	0.000548871	0.0210122	3	7	Up-regulated
Sus_scrofa___SLC25A13	0.687684	8.01315	15.5558	0.000552719	0.0210461	3	7	Up-regulated
Sus_scrofa___RNPEP	1.38031	3.00797	15.5693	0.000554105	0.0210551	3	7	Up-regulated
Sus_scrofa___ENSSSCG00000004578	2.1208	5.26868	15.5281	0.000558153	0.021176	3	7	Up-regulated
Sus_scrofa___SCARF2	2.61733	-0.205883	14.0882	0.000560031	0.0212067	3	7	Up-regulated
Sus_scrofa___PDE6D	0.926611	5.36509	15.5065	0.000561878	0.0212185	3	7	Up-regulated
Sus_scrofa___TUT7	0.600908	6.50083	15.48	0.000566671	0.0213665	3	7	Up-regulated
Sus_scrofa___ARL2BP	1.1463	2.3582	15.4661	0.000575051	0.0215631	3	7	Up-regulated
Sus_scrofa___TNNT1	1.51648	5.11033	15.4299	0.000576298	0.0215631	3	7	Up-regulated
Papio_anubis_WDR26	4.78698	-0.926108	16.5107	0.000578001	0.0215937	3	7	Up-regulated
Papio_anubis_EXOC6B	2.84232	0.0525907	14.8901	0.000587222	0.0218555	3	7	Up-regulated
Sus_scrofa___CASP10	1.49838	5.07949	15.3125	0.000599085	0.0221227	3	7	Up-regulated
Sus_scrofa___RILPL1	0.937397	7.5245	15.3094	0.000599404	0.0221227	3	7	Up-regulated
Sus_scrofa___PRR14L	0.660738	5.75802	15.303	0.000600742	0.0221387	3	7	Up-regulated
Sus_scrofa___FAM171B	1.89583	4.28513	15.2837	0.00060786	0.0223673	3	7	Up-regulated
Papio_anubis_ELOA	2.89198	1.35262	14.5206	0.000609362	0.0223888	3	7	Up-regulated
Sus_scrofa___SEMA3B	1.93406	0.333739	14.3934	0.000612711	0.0224356	3	7	Up-regulated
Sus_scrofa___MFRP	2.09382	1.07466	14.5301	0.000613261	0.0224356	3	7	Up-regulated
Sus_scrofa___MFSD2B	0.997707	3.6368	15.2474	0.000613481	0.0224356	3	7	Up-regulated
Sus_scrofa___SRXN1	2.46924	3.41975	15.2618	0.000614309	0.0224356	3	7	Up-regulated
Sus_scrofa___ALPK2	0.835431	9.10259	15.229	0.000615536	0.0224468	3	7	Up-regulated
Sus_scrofa___PTP4A2	0.758767	8.32715	15.2071	0.000620016	0.0225765	3	7	Up-regulated
Sus_scrofa___PHF11	1.2731	6.94439	15.2016	0.000621175	0.0225851	3	7	Up-regulated
Sus_scrofa___WBP1L	0.871562	5.69084	15.1717	0.000627425	0.0227109	3	7	Up-regulated
Sus_scrofa___ENSSSCG00000002950	0.844686	6.58249	15.1296	0.000636193	0.0228926	3	7	Up-regulated
Sus_scrofa___UBE2QL1	1.68738	2.91217	15.068	0.000653001	0.0233344	3	7	Up-regulated
Sus_scrofa___CHMP5	1.0347	3.34075	15.0572	0.000654325	0.0233389	3	7	Up-regulated
Sus_scrofa___ZBTB22	1.19404	3.22559	15.0156	0.000663971	0.023614	3	7	Up-regulated
Papio_anubis_PTP4A2	5.22014	-0.789505	16.1309	0.000669306	0.0237346	3	7	Up-regulated
Sus_scrofa___EEA1	0.871131	7.5403	14.9553	0.000674136	0.0238616	3	7	Up-regulated
Sus_scrofa___ATP8A2	1.6889	3.69448	14.9129	0.000686066	0.0241885	3	7	Up-regulated
Sus_scrofa___DPP3	1.1909	3.60035	14.8984	0.000689727	0.0242638	3	7	Up-regulated
Sus_scrofa___UBE2Z	0.927308	5.0496	14.8631	0.000695458	0.024379	3	7	Up-regulated
Sus_scrofa___MID2	0.82139	4.76269	14.8415	0.000700555	0.0245225	3	7	Up-regulated
Sus_scrofa___DENND3	1.47985	3.66677	14.7821	0.000716242	0.0249725	3	7	Up-regulated
Sus_scrofa___CSNK1G1	0.717649	7.27146	14.7688	0.000717502	0.0249725	3	7	Up-regulated
Papio_anubis_SOS2	4.69443	-0.673583	17.1266	0.00072992	0.0252357	3	7	Up-regulated
Papio_anubis_UBE3A	2.32635	0.325214	13.7585	0.000730228	0.0252357	3	7	Up-regulated
Sus_scrofa___TTF2	1.15836	3.5017	14.716	0.000733102	0.0252993	3	7	Up-regulated
Sus_scrofa___GNA12	0.721944	6.6373	14.6788	0.000739524	0.0253064	3	7	Up-regulated
Sus_scrofa___CDKN1A	1.67086	3.84026	14.6688	0.000743516	0.0253544	3	7	Up-regulated
Sus_scrofa___EPS15	0.664239	7.26231	14.6607	0.000744039	0.0253544	3	7	Up-regulated
Sus_scrofa___GFOD2	1.0191	4.7226	14.6064	0.000758182	0.025693	3	7	Up-regulated
Sus_scrofa___BCL2L1	1.38332	5.9334	14.5795	0.000764753	0.0258135	3	7	Up-regulated
Sus_scrofa___MBOAT1	1.13216	5.74336	14.5406	0.000774841	0.0261127	3	7	Up-regulated
Sus_scrofa___STAC2	2.49613	6.48798	14.4333	0.000806073	0.0267956	3	7	Up-regulated
Sus_scrofa___NQO1	1.76146	2.70495	14.3785	0.000820443	0.0271257	3	7	Up-regulated
Sus_scrofa___ENSSSCG00000014094	0.682785	6.19031	14.3597	0.000823657	0.0271552	3	7	Up-regulated
Sus_scrofa___ENSSSCG00000015823	1.83872	1.70304	14.2934	0.000824976	0.0271552	3	7	Up-regulated
Sus_scrofa___TXNIP	1.70029	8.4181	14.352	0.000825782	0.0271552	3	7	Up-regulated
Sus_scrofa___ZMYND8	0.61215	7.35081	14.3476	0.000827016	0.0271593	3	7	Up-regulated
Sus_scrofa___ENSSSCG00000037142	3.12442	-0.14708	13.1738	0.000829319	0.0271983	3	7	Up-regulated
Sus_scrofa___CAB39	0.892521	7.3512	14.3229	0.000833972	0.0272412	3	7	Up-regulated
Sus_scrofa___ZFP36L1	2.37032	3.953	14.3188	0.000838926	0.0272993	3	7	Up-regulated
Papio_anubis_ITSN2	4.14747	-0.723129	15.2875	0.000839102	0.0272993	3	7	Up-regulated
Papio_anubis_DNAJC13	4.96538	-0.767089	15.7244	0.000844475	0.0273239	3	7	Up-regulated
Sus_scrofa___CD276	0.97106	3.70753	14.2912	0.000845226	0.0273239	3	7	Up-regulated
Sus_scrofa___SNX25	0.845277	5.41055	14.2832	0.00084545	0.0273239	3	7	Up-regulated
Sus_scrofa___POLI	0.953043	4.39874	14.2417	0.000857868	0.0276521	3	7	Up-regulated
Sus_scrofa___PRR5	2.00732	1.20129	13.9821	0.000863846	0.0277657	3	7	Up-regulated
Sus_scrofa___NCAM1	1.30349	10.3485	14.2161	0.000864802	0.0277657	3	7	Up-regulated
Sus_scrofa___LRRC41	0.618012	5.94797	14.1771	0.000876452	0.0280038	3	7	Up-regulated
Sus_scrofa___MIF	2.12218	1.74341	14.0946	0.000876801	0.0280038	3	7	Up-regulated
Sus_scrofa___FLNB	1.75004	4.4645	14.1757	0.000878037	0.0280066	3	7	Up-regulated
Papio_anubis_MTDH	3.86519	-0.699996	14.7571	0.000885647	0.0282125	3	7	Up-regulated
Sus_scrofa___PTPRJ	1.2685	5.93987	14.1221	0.00089307	0.0282315	3	7	Up-regulated
Sus_scrofa___CNDP2	1.2724	2.67703	14.1412	0.000893176	0.0282315	3	7	Up-regulated
Papio_anubis_RABEP1	5.22914	-0.643137	14.9102	0.00089609	0.0282505	3	7	Up-regulated
Sus_scrofa___NFKB1	0.606931	7.58523	14.0682	0.000909568	0.0286016	3	7	Up-regulated
Sus_scrofa___OSTC	1.14057	2.75857	14.0149	0.000933206	0.0290996	3	7	Up-regulated
Sus_scrofa___NETO2	1.43082	3.19635	14.0129	0.000933742	0.0290996	3	7	Up-regulated
Sus_scrofa___KDM3A	0.718963	6.32945	13.9746	0.000939235	0.0291964	3	7	Up-regulated
Papio_anubis_TTC3	3.6634	-0.674114	13.8801	0.000945036	0.0293021	3	7	Up-regulated
Sus_scrofa___ACER2	1.90381	2.70198	13.9635	0.000949551	0.0293854	3	7	Up-regulated
Sus_scrofa___SQSTM1	1.07721	6.36112	13.936	0.000951757	0.0293854	3	7	Up-regulated
Sus_scrofa___SH3PXD2B	1.33414	7.08491	13.9336	0.000952533	0.0293854	3	7	Up-regulated
Sus_scrofa___SETD7	1.26361	6.98174	13.9084	0.000960798	0.0295657	3	7	Up-regulated
Sus_scrofa___TMEM140	1.74554	3.60571	13.8778	0.00097479	0.0299586	3	7	Up-regulated
Sus_scrofa___CLMN	1.60057	3.292	13.837	0.000986022	0.0300931	3	7	Up-regulated
Sus_scrofa___TCTN2	1.22594	5.22733	13.8285	0.00098779	0.0300931	3	7	Up-regulated
Sus_scrofa___FADS3	1.47259	5.37924	13.7918	0.00100033	0.0303557	3	7	Up-regulated
Sus_scrofa___WTIP	1.15697	4.82484	13.7892	0.00100138	0.0303557	3	7	Up-regulated
Papio_anubis_RBM25	3.33566	-0.698014	13.0618	0.00101484	0.0306877	3	7	Up-regulated
Sus_scrofa___CANX	0.758448	6.52601	13.7437	0.00101688	0.030688	3	7	Up-regulated
Sus_scrofa___ZNF197	1.0946	2.88922	13.7292	0.0010284	0.0308529	3	7	Up-regulated
Sus_scrofa___RBBP6	0.650528	6.62791	13.7086	0.00102928	0.0308529	3	7	Up-regulated
Sus_scrofa___SUSD1	0.993583	4.75648	13.7092	0.00102945	0.0308529	3	7	Up-regulated
Sus_scrofa___PPP1CA	2.19383	0.70881	13.1936	0.00103041	0.0308529	3	7	Up-regulated
Sus_scrofa___DZIP1L	0.786756	6.2965	13.6986	0.00103286	0.0308616	3	7	Up-regulated
Sus_scrofa___ENSSSCG00000005738	1.76541	2.12928	13.6734	0.00103327	0.0308616	3	7	Up-regulated
Sus_scrofa___SETDB2	0.901554	5.82763	13.6942	0.00103449	0.0308616	3	7	Up-regulated
Sus_scrofa___ENSSSCG00000022246	3.78116	0.0490278	12.7519	0.00103731	0.0309079	3	7	Up-regulated
Sus_scrofa___YIPF1	0.814343	5.40244	13.6762	0.001041	0.0309803	3	7	Up-regulated
Sus_scrofa___ENSSSCG00000003990	0.865601	3.41452	13.6225	0.0010639	0.0314701	3	7	Up-regulated
Papio_anubis_SOS1	4.41219	-0.7632	15.1692	0.00106909	0.0315855	3	7	Up-regulated
Sus_scrofa___CHCHD6	0.902225	4.8446	13.5868	0.00107399	0.0316635	3	7	Up-regulated
Papio_anubis_FNIP1	4.29902	-0.73669	13.7766	0.00107433	0.0316635	3	7	Up-regulated
Papio_anubis_XPO1	2.37817	-0.261988	13.1348	0.00107995	0.0317908	3	7	Up-regulated
Sus_scrofa___ENSSSCG00000035836	2.29882	0.848234	13.107	0.00108444	0.0318463	3	7	Up-regulated
Sus_scrofa___NFYA	0.819439	4.1133	13.5126	0.0011026	0.0321552	3	7	Up-regulated
Sus_scrofa___RECQL	0.962946	3.72066	13.5153	0.00110285	0.0321552	3	7	Up-regulated
Sus_scrofa___TM9SF2	0.743763	6.29447	13.497	0.00110761	0.0322436	3	7	Up-regulated
Sus_scrofa___ADRM1	1.30047	2.9986	13.4846	0.00111773	0.0324728	3	7	Up-regulated
Sus_scrofa___IFIH1	3.07407	6.8013	13.4545	0.00112806	0.0327337	3	7	Up-regulated
Sus_scrofa___FUT10	1.07614	5.57211	13.428	0.00113463	0.0328856	3	7	Up-regulated
Sus_scrofa___MAP1LC3B	0.736809	5.24926	13.4229	0.0011367	0.0329065	3	7	Up-regulated
Sus_scrofa___SH3GLB1	0.702572	7.24124	13.4096	0.0011418	0.0329758	3	7	Up-regulated
Sus_scrofa___ZNF891	0.888134	4.44202	13.3853	0.00115224	0.0331989	3	7	Up-regulated
Sus_scrofa___ZBTB37	0.6352	5.32391	13.3543	0.00116425	0.0335055	3	7	Up-regulated
Sus_scrofa___MAMLD1	1.24302	4.9159	13.3458	0.0011679	0.0335315	3	7	Up-regulated
Sus_scrofa___ANO10	0.872935	6.53986	13.3008	0.00118604	0.0339759	3	7	Up-regulated
Sus_scrofa___CHCHD5	1.62074	1.37079	13.2208	0.00118616	0.0339759	3	7	Up-regulated
Sus_scrofa___SLC16A12	2.26105	3.04947	13.2603	0.00121347	0.0344154	3	7	Up-regulated
Sus_scrofa___SLC25A24	2.17807	3.63333	13.2456	0.00121416	0.0344154	3	7	Up-regulated
Sus_scrofa___ITGA5	1.12187	7.80261	13.2183	0.00122078	0.0344426	3	7	Up-regulated
Papio_anubis_NFAT5	3.10097	-0.302091	13.3398	0.00123123	0.0346975	3	7	Up-regulated
Sus_scrofa___ZNF292	0.595778	7.72884	13.17	0.00124163	0.0349501	3	7	Up-regulated
Sus_scrofa___PARP12	2.90923	6.1588	13.171	0.00124509	0.0349731	3	7	Up-regulated
Sus_scrofa___TSPAN14	2.28976	0.711975	12.3737	0.00124731	0.0349731	3	7	Up-regulated
Sus_scrofa___YPEL5	0.957394	5.70341	13.1482	0.0012513	0.0349842	3	7	Up-regulated
Papio_anubis_FAF2	4.13973	-1.00639	14.1827	0.00126339	0.0352378	3	7	Up-regulated
Sus_scrofa___CDKL3	1.15586	3.70284	13.1087	0.00127153	0.0353795	3	7	Up-regulated
Sus_scrofa___SNX4	0.594233	6.25314	13.0883	0.00127785	0.0353975	3	7	Up-regulated
Sus_scrofa___ARRDC4	1.41172	3.53943	13.0717	0.00128824	0.0355254	3	7	Up-regulated
Sus_scrofa___ENSSSCG00000007525	1.01023	2.28902	13.0622	0.00129762	0.0357034	3	7	Up-regulated
Sus_scrofa___ATMIN	0.849631	4.44434	13.0377	0.00130152	0.0357219	3	7	Up-regulated
Sus_scrofa___CBLC	1.89115	0.807672	12.5814	0.00131271	0.0359568	3	7	Up-regulated
Sus_scrofa___TLNRD1	2.12298	0.198435	12.0296	0.00131427	0.0359593	3	7	Up-regulated
Sus_scrofa___MXD1	1.23867	5.58011	12.9705	0.00133224	0.0362863	3	7	Up-regulated
Sus_scrofa___TMEM231	0.991018	2.74349	12.9842	0.00133324	0.0362863	3	7	Up-regulated
Sus_scrofa___ENSSSCG00000002935	0.830665	4.36087	12.9514	0.00134203	0.0364525	3	7	Up-regulated
Sus_scrofa___ENSSSCG00000030801	1.36063	4.47868	12.9252	0.00135474	0.0365939	3	7	Up-regulated
Sus_scrofa___PRR16	0.969857	9.70107	12.8993	0.00136595	0.0368369	3	7	Up-regulated
Sus_scrofa___ANXA4	0.824126	5.83446	12.876	0.0013774	0.037064	3	7	Up-regulated
Sus_scrofa___LAMTOR1	1.40986	2.28256	12.8826	0.00138445	0.0371717	3	7	Up-regulated
Sus_scrofa___FAM76A	0.644968	6.41923	12.8279	0.00140102	0.0372967	3	7	Up-regulated
Sus_scrofa___ENSSSCG00000002023.5	1.09916	2.55943	12.848	0.00140128	0.0372967	3	7	Up-regulated
Sus_scrofa___ALG14	0.907953	5.69986	12.8266	0.00140175	0.0372967	3	7	Up-regulated
Sus_scrofa___ANKRD2	2.16798	5.10742	12.7759	0.00142987	0.037794	3	7	Up-regulated
Sus_scrofa___KIAA1614	0.855552	4.34371	12.7594	0.00143686	0.0379123	3	7	Up-regulated
Sus_scrofa___HPGD	2.37061	2.00206	12.7224	0.00145062	0.0381275	3	7	Up-regulated
Sus_scrofa___RBCK1	0.918831	3.91857	12.7237	0.00145585	0.0381661	3	7	Up-regulated
Sus_scrofa___SLCO3A1	0.854702	9.82409	12.7083	0.0014618	0.038281	3	7	Up-regulated
Sus_scrofa___HM13	0.722121	5.26892	12.7021	0.00146525	0.0383302	3	7	Up-regulated
Sus_scrofa___ENSSSCG00000024660	2.58625	1.67403	12.3132	0.00146924	0.0383935	3	7	Up-regulated
Sus_scrofa___TOR3A	1.07099	3.53727	12.6763	0.00148203	0.0385628	3	7	Up-regulated
Sus_scrofa___KCNMB3	1.18477	1.41059	12.6028	0.00148747	0.0385811	3	7	Up-regulated
Sus_scrofa___FARP1	0.775328	7.11075	12.6417	0.00149695	0.0387858	3	7	Up-regulated
Sus_scrofa___MOB1A	0.770096	4.35493	12.6378	0.00149984	0.0388195	3	7	Up-regulated
Sus_scrofa___CADPS2	2.29066	4.28483	12.6355	0.0015039	0.0388833	3	7	Up-regulated
Sus_scrofa___ENSSSCG00000043413	4.47629	-0.654033	13.6008	0.00150729	0.0389299	3	7	Up-regulated
Sus_scrofa___ME1	1.02315	5.68258	12.6072	0.00151565	0.0391041	3	7	Up-regulated
Sus_scrofa___ZNF274	0.701079	5.92307	12.5892	0.00152535	0.0391425	3	7	Up-regulated
Sus_scrofa___SLC37A3	0.805605	4.45999	12.558	0.00154334	0.0394004	3	7	Up-regulated
Sus_scrofa___PSMC6	0.691328	7.49253	12.5426	0.00155085	0.0394707	3	7	Up-regulated
Sus_scrofa___RAB18	0.577119	6.88952	12.5256	0.00156035	0.0396153	3	7	Up-regulated
Papio_anubis_SNX14	4.80733	-0.75774	13.4298	0.00156139	0.0396153	3	7	Up-regulated
Sus_scrofa___SPRYD3	0.970314	3.13014	12.5233	0.00156803	0.0397322	3	7	Up-regulated
Sus_scrofa___MBNL3	0.800735	6.16044	12.5098	0.00156926	0.0397322	3	7	Up-regulated
Sus_scrofa___NSFL1C	0.700535	5.55	12.501	0.00157432	0.0397781	3	7	Up-regulated
Papio_anubis_BLTP1	4.88012	-0.675623	13.8198	0.00157879	0.0398498	3	7	Up-regulated
Sus_scrofa___PSMB3	0.991767	3.07829	12.4953	0.00158343	0.0398569	3	7	Up-regulated
Sus_scrofa___UCK2	1.40088	7.65371	12.4821	0.00158482	0.0398569	3	7	Up-regulated
Papio_anubis_CYFIP1	3.93309	-0.902482	13.3117	0.00158493	0.0398569	3	7	Up-regulated
Sus_scrofa___OSBPL1A	0.599736	7.74781	12.4507	0.0016028	0.0400832	3	7	Up-regulated
Sus_scrofa___MAPK6	0.704317	5.85648	12.4433	0.00160715	0.0401097	3	7	Up-regulated
Sus_scrofa___VANGL1	0.800182	4.26513	12.4269	0.00161778	0.0402929	3	7	Up-regulated
Sus_scrofa___SND1	0.816589	6.71419	12.4108	0.00162594	0.0403794	3	7	Up-regulated
Sus_scrofa___ANKMY2	1.0346	5.06942	12.4097	0.00162697	0.0403794	3	7	Up-regulated
Sus_scrofa___ENSSSCG00000043164	2.02105	1.05784	11.9124	0.00162787	0.0403794	3	7	Up-regulated
Sus_scrofa___TXNRD1	0.873587	6.81125	12.3978	0.00163359	0.0404107	3	7	Up-regulated
Sus_scrofa___TREX1	2.14642	1.19594	12.0904	0.00163925	0.0404974	3	7	Up-regulated
Sus_scrofa___ENSSSCG00000012006	1.75462	5.34517	12.3721	0.00164969	0.0406729	3	7	Up-regulated
Sus_scrofa___RAD51B	0.813	7.95704	12.3459	0.0016643	0.0409093	3	7	Up-regulated
Papio_anubis_UNC50	4.13587	-0.79836	11.8958	0.00166714	0.040938	3	7	Up-regulated
Sus_scrofa___ABCB6	1.46547	2.51445	12.3236	0.00168474	0.0412045	3	7	Up-regulated
Sus_scrofa___KIAA0319L	0.513022	7.6121	12.308	0.00168719	0.041223	3	7	Up-regulated
Sus_scrofa___TRIM14	2.21484	1.08131	11.8489	0.00169318	0.0413281	3	7	Up-regulated
Sus_scrofa___ZNF358	1.22819	2.21512	12.3092	0.00169925	0.0413867	3	7	Up-regulated
Sus_scrofa___ENSSSCG00000032552	0.924942	4.42503	12.2637	0.00171555	0.0414405	3	7	Up-regulated
Sus_scrofa___ETS1	1.50955	4.50499	12.2571	0.00172123	0.0414741	3	7	Up-regulated
Sus_scrofa___C8orf48	2.1334	0.613662	11.6263	0.001723	0.0414758	3	7	Up-regulated
Sus_scrofa___PSMB7	0.7196	5.79582	12.2212	0.00174107	0.0417464	3	7	Up-regulated
Sus_scrofa___LDLR	2.64838	1.79618	11.8529	0.00174392	0.0417736	3	7	Up-regulated
Sus_scrofa___TRAM1	0.725409	5.41404	12.2095	0.00174853	0.041843	3	7	Up-regulated
Sus_scrofa___CTTN	1.01449	4.4483	12.17	0.00177451	0.0422843	3	7	Up-regulated
Sus_scrofa___DDX11	1.23447	4.09453	12.1643	0.00177894	0.0422843	3	7	Up-regulated
Sus_scrofa___ENSSSCG00000011121	0.756154	10.6417	12.1612	0.00177908	0.0422843	3	7	Up-regulated
Sus_scrofa___DCLRE1B	1.45351	1.67946	12.1238	0.00178709	0.0424139	3	7	Up-regulated
Sus_scrofa___LRP8	1.64214	4.87875	12.1492	0.00178801	0.0424139	3	7	Up-regulated
Sus_scrofa___MNT	1.32586	2.3659	12.1618	0.00179118	0.0424481	3	7	Up-regulated
Sus_scrofa___RNASEL	1.48807	2.52077	12.1325	0.00179541	0.0424658	3	7	Up-regulated
Sus_scrofa___DDO	0.674182	5.75299	12.1208	0.0018055	0.0426044	3	7	Up-regulated
Sus_scrofa___TMED10	0.760218	5.70529	12.1192	0.0018065	0.0426044	3	7	Up-regulated
Sus_scrofa___GOLGA5	0.706195	4.81504	12.1144	0.00181007	0.0426475	3	7	Up-regulated
Sus_scrofa___AMN1	0.596836	6.77151	12.1065	0.00181476	0.0426774	3	7	Up-regulated
Sus_scrofa___TRERF1	0.940468	4.86905	12.1072	0.00181483	0.0426774	3	7	Up-regulated
Sus_scrofa___PARD6B	1.27717	2.99473	12.0977	0.0018294	0.042865	3	7	Up-regulated
Sus_scrofa___DDIT4	2.10059	3.6171	12.0957	0.00183104	0.042865	3	7	Up-regulated
Sus_scrofa___PRKCE	0.808049	9.82677	12.0813	0.0018314	0.042865	3	7	Up-regulated
Sus_scrofa___THNSL2	0.805735	5.17542	12.0755	0.0018356	0.042865	3	7	Up-regulated
Sus_scrofa___VPS53	0.584804	6.67264	12.0622	0.00184419	0.0428852	3	7	Up-regulated
Sus_scrofa___ERAP2	2.35491	2.4537	11.9951	0.00184473	0.0428852	3	7	Up-regulated
Sus_scrofa___ZNF800	0.704903	5.74821	11.9994	0.00188685	0.0436097	3	7	Up-regulated
Papio_anubis_USP9X	4.1436	-0.831729	13.1656	0.00188839	0.0436097	3	7	Up-regulated
Sus_scrofa___ENSSSCG00000016186	1.65324	3.1857	11.9882	0.00190326	0.0438288	3	7	Up-regulated
Sus_scrofa___TENT4A	0.807737	4.92674	11.9643	0.00191145	0.0439342	3	7	Up-regulated
Papio_anubis_PSMC3	3.59709	-0.904586	12.7593	0.00191345	0.0439342	3	7	Up-regulated
Sus_scrofa___PPP1R3C	0.998291	5.90231	11.9589	0.00191499	0.0439342	3	7	Up-regulated
Sus_scrofa___SUMO3	1.14613	1.49754	11.9231	0.00191503	0.0439342	3	7	Up-regulated
Sus_scrofa___ENSSSCG00000016119	0.987246	6.90839	11.9522	0.0019195	0.0439954	3	7	Up-regulated
Sus_scrofa___FJX1	2.42598	0.508525	11.1323	0.00192705	0.0440858	3	7	Up-regulated
Sus_scrofa___SNX24	0.82511	7.1432	11.9379	0.00192946	0.0440997	3	7	Up-regulated
Sus_scrofa___FOXO1	0.986497	7.67367	11.885	0.00196708	0.0446256	3	7	Up-regulated
Sus_scrofa___RRAGA	1.51681	1.17916	11.7004	0.0019897	0.0450551	3	7	Up-regulated
Sus_scrofa___MTSS1	0.881615	7.66893	11.8417	0.00199846	0.0451696	3	7	Up-regulated
Sus_scrofa___VAV2	1.33321	3.88909	11.8402	0.00200213	0.0452069	3	7	Up-regulated
Sus_scrofa___ENSSSCG00000014910	2.2124	1.89009	11.6324	0.00200381	0.0452069	3	7	Up-regulated
Sus_scrofa___CHD3	1.16041	3.96336	11.8215	0.00201616	0.0454436	3	7	Up-regulated
Sus_scrofa___SDCCAG8	0.743508	8.09998	11.814	0.00201882	0.0454592	3	7	Up-regulated
Sus_scrofa___TMEM238	3.82506	-0.693087	11.7653	0.00202057	0.0454592	3	7	Up-regulated
Sus_scrofa___WASHC1	0.936942	2.91925	11.8026	0.00203685	0.0456992	3	7	Up-regulated
Sus_scrofa___SH3BGRL2	2.18115	1.2673	11.4122	0.00203924	0.0457107	3	7	Up-regulated
Sus_scrofa___ENSSSCG00000003621	1.01085	3.04294	11.7937	0.00204202	0.0457311	3	7	Up-regulated
Sus_scrofa___GIPC1	1.27963	2.41977	11.7957	0.00204597	0.0457669	3	7	Up-regulated
Sus_scrofa___AGO4	0.795073	6.57624	11.7757	0.00204736	0.0457669	3	7	Up-regulated
Sus_scrofa___PEX7	0.72127	5.83359	11.7626	0.00205737	0.0459067	3	7	Up-regulated
Sus_scrofa___IER5	1.37738	3.89698	11.7579	0.00206396	0.0460117	3	7	Up-regulated
Papio_anubis_CDK14	3.27314	-0.493418	12.0672	0.00208035	0.046323	3	7	Up-regulated
Sus_scrofa___SLC20A2	1.13576	9.41304	11.7278	0.00208362	0.046323	3	7	Up-regulated
Sus_scrofa___ENSSSCG00000017971	1.32271	2.33506	11.7411	0.00208651	0.0463451	3	7	Up-regulated
Sus_scrofa___TMEM127	0.709436	5.28615	11.7162	0.0020928	0.0464039	3	7	Up-regulated
Sus_scrofa___CPNE1	0.782082	6.85994	11.6862	0.00211575	0.0467734	3	7	Up-regulated
Sus_scrofa___SCAMP4	1.12014	2.57364	11.7008	0.00211727	0.0467734	3	7	Up-regulated
Sus_scrofa___ZNF45	0.616589	4.784	11.6705	0.00212864	0.0469396	3	7	Up-regulated
Sus_scrofa___CSE1L	0.798211	6.32598	11.6605	0.00213587	0.0470565	3	7	Up-regulated
Sus_scrofa___TMEM192	0.882672	3.50088	11.659	0.00214139	0.0471294	3	7	Up-regulated
Sus_scrofa___TMOD3	0.731431	6.15962	11.6515	0.00214303	0.0471294	3	7	Up-regulated
Sus_scrofa___HSPBAP1	0.855659	5.00111	11.6166	0.00217109	0.0475405	3	7	Up-regulated
Sus_scrofa___SNX6	0.641331	6.33879	11.6132	0.0021734	0.0475405	3	7	Up-regulated
Sus_scrofa___ARFIP1	0.533169	7.16807	11.6096	0.00217624	0.04756	3	7	Up-regulated
Sus_scrofa___CDC42EP4	2.36375	0.880016	11.001	0.00217888	0.0475752	3	7	Up-regulated
Papio_anubis_CCNT2	3.73127	-1.03793	11.8894	0.00218171	0.0475762	3	7	Up-regulated
Papio_anubis_MYCBP2	4.67202	-0.948123	12.1439	0.00219584	0.0478173	3	7	Up-regulated
Sus_scrofa___phTBM	1.65594	2.05767	11.911	0.00220862	0.0480101	3	7	Up-regulated
Papio_anubis_ENSPANG00000017987	5.15042	-0.769397	12.2332	0.00221929	0.048199	3	7	Up-regulated
Sus_scrofa___ENSSSCG00000034802	4.51755	-0.0525369	11.9906	0.00223394	0.0484742	3	7	Up-regulated
Sus_scrofa___MAP1B	0.957462	6.90434	11.5304	0.00224081	0.0485713	3	7	Up-regulated
Sus_scrofa___CDKN2AIP	1.31408	1.50667	11.4889	0.00226265	0.0487507	3	7	Up-regulated
Papio_anubis_HNRNPD	2.46906	-0.433123	10.6528	0.0022682	0.0488273	3	7	Up-regulated
Papio_anubis_ENSPANG00000005380	3.38104	-0.744151	11.9463	0.00227864	0.0490089	3	7	Up-regulated
Sus_scrofa___KLF6	1.44411	6.47175	11.4343	0.0023219	0.0498077	3	7	Up-regulated
Sus_scrofa___PGAM2	1.64918	3.14792	11.4394	0.00232705	0.0498563	3	7	Up-regulated
Sus_scrofa___JMJD4	0.8877	2.60123	11.4416	0.00232825	0.0498563	3	7	Up-regulated
Sus_scrofa___ZDHHC20	0.783781	6.46908	11.4124	0.00234082	0.0499592	3	7	Up-regulated
Sus_scrofa___DAPL1	-4.62517	4.75991	60.2545	3.39173e-08	4.36158e-05	3	7	Down-regulated
Sus_scrofa___ENSSSCG00000038605	-5.93538	3.30781	55.3798	4.63242e-08	5.14472e-05	3	7	Down-regulated
Sus_scrofa___MYLIP	-2.79177	4.7442	54.7028	8.25815e-08	8.40714e-05	3	7	Down-regulated
Sus_scrofa___PTN	-3.83434	2.75438	48.3203	2.13288e-07	0.000162852	3	7	Down-regulated
Sus_scrofa___JADE1	-2.00813	8.165	47.1335	2.98251e-07	0.000202421	3	7	Down-regulated
Sus_scrofa___ADAMTSL1	-2.74044	7.7016	45.3877	4.09563e-07	0.000212912	3	7	Down-regulated
Sus_scrofa___ENSSSCG00000048752	-2.72471	4.04967	45.2468	4.25569e-07	0.000216623	3	7	Down-regulated
Sus_scrofa___ACOT11	-2.69844	7.73243	42.4186	7.15572e-07	0.000305771	3	7	Down-regulated
Sus_scrofa___ENOX1	-2.92684	9.026	42.2824	7.34542e-07	0.000305771	3	7	Down-regulated
Sus_scrofa___ENSSSCG00000036052	-2.00028	9.18541	39.0438	1.39236e-06	0.000468882	3	7	Down-regulated
Sus_scrofa___RNF207	-2.19995	6.24275	38.937	1.42349e-06	0.000468882	3	7	Down-regulated
Sus_scrofa___ZBTB7C	-3.38528	5.53783	37.0824	2.09099e-06	0.000608204	3	7	Down-regulated
Sus_scrofa___ACTC1	-4.28408	7.93328	36.5742	2.31977e-06	0.000659056	3	7	Down-regulated
Sus_scrofa___ENSSSCG00000051591	-4.2475	4.87802	35.2599	3.05458e-06	0.000798631	3	7	Down-regulated
Sus_scrofa___NASP	-1.28204	5.01753	34.362	3.73478e-06	0.000894627	3	7	Down-regulated
Sus_scrofa___RIBC1	-2.49697	2.60257	34.2514	3.80985e-06	0.000903033	3	7	Down-regulated
Sus_scrofa___CACNA1D	-1.81304	5.29535	33.4183	4.59867e-06	0.00103082	3	7	Down-regulated
Sus_scrofa___ENSSSCG00000037140	-1.94522	4.69645	32.343	5.86558e-06	0.00119428	3	7	Down-regulated
Sus_scrofa___MYLK3	-1.4847	8.52571	32.0742	6.22157e-06	0.00125629	3	7	Down-regulated
Sus_scrofa___PRKCG	-4.74493	3.50701	30.3761	7.49141e-06	0.0014189	3	7	Down-regulated
Sus_scrofa___ENSSSCG00000045296	-2.96278	3.19022	30.6622	8.64631e-06	0.00154874	3	7	Down-regulated
Sus_scrofa___AIF1	-5.7003	0.554212	30.1782	8.70233e-06	0.00154874	3	7	Down-regulated
Sus_scrofa___ADRA1A	-4.15631	6.44651	30.5729	8.82617e-06	0.00154874	3	7	Down-regulated
Papio_anubis_ENSPANG00000029693	-2.31861	1.60165	29.2633	1.05548e-05	0.00174255	3	7	Down-regulated
Sus_scrofa___ENSSSCG00000049978	-3.44282	1.72833	28.9621	1.06336e-05	0.00174255	3	7	Down-regulated
Sus_scrofa___ENSSSCG00000012700	-1.76028	6.97887	29.7153	1.07825e-05	0.00174255	3	7	Down-regulated
Sus_scrofa___ITGA1	-3.46242	3.82941	29.6544	1.10058e-05	0.00175755	3	7	Down-regulated
Sus_scrofa___ISM1	-3.76431	4.69118	28.7562	1.36486e-05	0.00205849	3	7	Down-regulated
Sus_scrofa___ENSSSCG00000039552	-3.53377	3.86232	28.6414	1.40155e-05	0.00210086	3	7	Down-regulated
Sus_scrofa___TMEM52B	-2.66434	4.71974	28.5635	1.42631e-05	0.00212494	3	7	Down-regulated
Sus_scrofa___ENSSSCG00000011344	-3.07488	0.965788	27.2713	1.4938e-05	0.00219867	3	7	Down-regulated
Sus_scrofa___ENSSSCG00000049530	-3.24786	3.5913	28.1696	1.56756e-05	0.00226629	3	7	Down-regulated
Sus_scrofa___RGS7BP	-1.43671	6.90466	28.0322	1.62083e-05	0.00231584	3	7	Down-regulated
Sus_scrofa___ENSSSCG00000006213	-1.44765	4.58182	28.0285	1.62456e-05	0.00231584	3	7	Down-regulated
Sus_scrofa___MYBPC3	-1.80976	10.251	27.8456	1.69709e-05	0.00236943	3	7	Down-regulated
Sus_scrofa___ENSSSCG00000011676	-2.09127	6.66824	27.6926	1.76272e-05	0.00241572	3	7	Down-regulated
Sus_scrofa___SLC66A2	-1.28177	6.2537	27.6766	1.76979e-05	0.00241572	3	7	Down-regulated
Sus_scrofa___ENSSSCG00000050174	-4.23317	4.82481	27.5929	1.81155e-05	0.00245898	3	7	Down-regulated
Sus_scrofa___CDH9	-4.40447	4.9789	27.4517	1.82957e-05	0.00246972	3	7	Down-regulated
Sus_scrofa___NAALADL2	-1.48632	7.25043	27.181	2.00218e-05	0.00263765	3	7	Down-regulated
Sus_scrofa___ROS1	-3.74358	3.71766	26.775	2.18754e-05	0.00279833	3	7	Down-regulated
Sus_scrofa___GPR137C	-2.2751	8.00077	26.4753	2.39204e-05	0.00301765	3	7	Down-regulated
Sus_scrofa___ADAMTS6	-2.28417	8.43386	26.2802	2.51378e-05	0.00309785	3	7	Down-regulated
Sus_scrofa___CRYBG3	-2.01581	10.0607	26.2656	2.52311e-05	0.00309785	3	7	Down-regulated
Sus_scrofa___ENSSSCG00000044253	-3.20912	2.39339	26.0344	2.57567e-05	0.00312191	3	7	Down-regulated
Sus_scrofa___SMTN	-1.92336	5.39128	25.9202	2.75944e-05	0.00328885	3	7	Down-regulated
Sus_scrofa___CEP126	-1.21695	7.80261	25.5903	3.00098e-05	0.00349157	3	7	Down-regulated
Sus_scrofa___ENSSSCG00000047013	-3.80516	0.406374	23.8064	3.15877e-05	0.00362339	3	7	Down-regulated
Sus_scrofa___RASAL2	-1.08992	7.83497	25.2511	3.27714e-05	0.00370697	3	7	Down-regulated
Sus_scrofa___ENSSSCG00000033405	-3.30421	3.89396	25.1568	3.37256e-05	0.00376264	3	7	Down-regulated
Sus_scrofa___KCND3	-2.25358	5.08185	24.8861	3.61262e-05	0.00394049	3	7	Down-regulated
Sus_scrofa___GRM5	-3.63348	5.84693	24.7767	3.71302e-05	0.00401375	3	7	Down-regulated
Sus_scrofa___ENSSSCG00000044774	-3.56928	3.64917	24.7285	3.72906e-05	0.00401375	3	7	Down-regulated
Sus_scrofa___PREX2	-3.11691	3.82151	24.6333	3.88549e-05	0.00413558	3	7	Down-regulated
Sus_scrofa___CD302	-2.26836	2.94319	24.6235	3.89303e-05	0.00413558	3	7	Down-regulated
Sus_scrofa___ENSSSCG00000044453	-2.86121	3.38689	24.2148	4.34063e-05	0.00441895	3	7	Down-regulated
Sus_scrofa___ZDHHC8	-2.39624	2.88319	23.9503	4.62026e-05	0.00466475	3	7	Down-regulated
Sus_scrofa___PAICS	-1.98583	2.21676	23.441	5.27627e-05	0.0050643	3	7	Down-regulated
Sus_scrofa___ENSSSCG00000031608	-1.73853	8.26814	23.094	5.82329e-05	0.00547232	3	7	Down-regulated
Sus_scrofa___ENSSSCG00000047475	-2.51545	3.53116	23.0932	5.85792e-05	0.00548378	3	7	Down-regulated
Sus_scrofa___LRCH2	-1.46329	5.53749	23.0169	5.94882e-05	0.00554762	3	7	Down-regulated
Sus_scrofa___ENSSSCG00000035525	-1.93553	2.88036	22.6212	6.67523e-05	0.00605539	3	7	Down-regulated
Sus_scrofa___ENSSSCG00000045986	-4.45338	2.25304	22.1281	6.69159e-05	0.00605539	3	7	Down-regulated
Sus_scrofa___MMP11	-2.58456	6.11148	22.5006	6.85575e-05	0.00615833	3	7	Down-regulated
Sus_scrofa___DNAH11	-1.78958	3.23375	22.321	7.25663e-05	0.00633605	3	7	Down-regulated
Sus_scrofa___ZNF483	-1.63005	3.04073	22.3267	7.26106e-05	0.00633605	3	7	Down-regulated
Sus_scrofa___TPST2	-1.38461	4.76135	22.2433	7.36746e-05	0.00640602	3	7	Down-regulated
Sus_scrofa___ENSSSCG00000012049	-1.55067	5.95308	22.1801	7.49225e-05	0.00649143	3	7	Down-regulated
Sus_scrofa___SLC25A29	-1.51273	6.59765	22.1368	7.58227e-05	0.00653225	3	7	Down-regulated
Sus_scrofa___GRIN2A	-2.29477	4.94105	22.1355	7.59284e-05	0.00653225	3	7	Down-regulated
Sus_scrofa___FAM166B	-4.44947	0.414624	21.0652	7.85317e-05	0.00670897	3	7	Down-regulated
Sus_scrofa___ENSSSCG00000035617	-2.07049	6.21664	21.8761	8.15713e-05	0.00684291	3	7	Down-regulated
Sus_scrofa___EPHA7	-1.71314	7.05806	21.8658	8.17889e-05	0.00684291	3	7	Down-regulated
Sus_scrofa___ENSSSCG00000047384	-3.46015	1.78261	21.0421	8.63096e-05	0.00705285	3	7	Down-regulated
Sus_scrofa___MYO1H	-1.59235	3.99634	21.642	8.73383e-05	0.00711312	3	7	Down-regulated
Sus_scrofa___WSCD1	-5.02773	-0.0870439	20.4192	8.80641e-05	0.0071484	3	7	Down-regulated
Sus_scrofa___ABCA1	-2.28381	6.8572	21.5191	9.01751e-05	0.00721286	3	7	Down-regulated
Sus_scrofa___TENM2	-2.44376	10.2146	21.461	9.16642e-05	0.00721286	3	7	Down-regulated
Sus_scrofa___ERICH4	-3.9178	1.32936	20.6852	9.17774e-05	0.00721286	3	7	Down-regulated
Sus_scrofa___ADAM9	-0.949535	5.67883	21.2336	9.77897e-05	0.00753721	3	7	Down-regulated
Sus_scrofa___ASB15	-2.30278	7.63078	21.1487	0.000100167	0.00760946	3	7	Down-regulated
Sus_scrofa___ENSSSCG00000031075	-3.61737	3.2018	21.0467	0.000100257	0.00760946	3	7	Down-regulated
Sus_scrofa___ENSSSCG00000041499	-3.41045	4.56699	21.13	0.000101202	0.00765531	3	7	Down-regulated
Sus_scrofa___PRL	-3.73337	0.892912	20.2574	0.000103165	0.0077686	3	7	Down-regulated
Sus_scrofa___ADAMTS18	-1.8854	4.80974	21.017	0.00010408	0.00780057	3	7	Down-regulated
Sus_scrofa___WSCD2	-2.70929	5.22703	20.8631	0.000108778	0.00812776	3	7	Down-regulated
Sus_scrofa___ASB14	-2.41081	3.56216	20.8676	0.000109262	0.00813899	3	7	Down-regulated
Sus_scrofa___PEX5L	-2.45822	5.95814	20.818	0.000110132	0.00817891	3	7	Down-regulated
Sus_scrofa___HS3ST5	-3.75261	6.65907	20.7231	0.000113184	0.00835477	3	7	Down-regulated
Sus_scrofa___ENSSSCG00000043205	-3.00818	2.87224	20.6642	0.000115212	0.00839406	3	7	Down-regulated
Sus_scrofa___GDF11	-2.53611	1.47068	20.25	0.000116645	0.00839603	3	7	Down-regulated
Sus_scrofa___CMTM5	-3.16083	6.53554	20.6031	0.00011715	0.00839603	3	7	Down-regulated
Sus_scrofa___FBLIM1	-1.17217	5.65888	20.6025	0.00011718	0.00839603	3	7	Down-regulated
Sus_scrofa___ENSSSCG00000049945	-3.57203	0.659853	19.9846	0.000121072	0.00854599	3	7	Down-regulated
Sus_scrofa___FCGR1A	-2.47079	3.08343	20.4918	0.000121371	0.00854599	3	7	Down-regulated
Sus_scrofa___RORA	-1.04261	9.48672	20.4501	0.000122432	0.00859591	3	7	Down-regulated
Sus_scrofa___GFRA1	-2.20645	2.19024	20.2595	0.000126723	0.00884637	3	7	Down-regulated
Sus_scrofa___INSC	-2.12232	4.08158	20.1582	0.000133844	0.00918601	3	7	Down-regulated
Sus_scrofa___CXCR6	-3.62053	0.758841	19.1622	0.000137669	0.0093731	3	7	Down-regulated
Sus_scrofa___DNAAF1	-2.28401	1.44278	19.8833	0.000137721	0.0093731	3	7	Down-regulated
Sus_scrofa___HJV	-6.73668	1.36747	20.0332	0.000138749	0.00941684	3	7	Down-regulated
Sus_scrofa___ENSSSCG00000041764	-1.09459	7.88571	19.9713	0.000140761	0.00951317	3	7	Down-regulated
Sus_scrofa___AASS	-2.37316	5.19058	19.7705	0.000149408	0.00991981	3	7	Down-regulated
Sus_scrofa___ENSSSCG00000026345	-1.69707	2.32831	19.7149	0.000152072	0.0100471	3	7	Down-regulated
Sus_scrofa___FAM160A2	-1.57847	4.02414	19.714	0.000152147	0.0100471	3	7	Down-regulated
Sus_scrofa___ENSSSCG00000038903	-1.51939	2.8027	19.6193	0.00015748	0.010288	3	7	Down-regulated
Sus_scrofa___ENSSSCG00000047064	-2.20443	1.42714	19.3586	0.000160897	0.010459	3	7	Down-regulated
Sus_scrofa___HSD17B10	-2.22961	0.908208	18.8236	0.000164675	0.0106724	3	7	Down-regulated
Sus_scrofa___FER1L6	-1.87748	5.18578	19.4174	0.000165808	0.0106837	3	7	Down-regulated
Sus_scrofa___HOMER1	-1.34211	9.2565	19.4024	0.000166483	0.0106837	3	7	Down-regulated
Sus_scrofa___SH3KBP1	-1.47435	5.70164	19.2546	0.000174003	0.011014	3	7	Down-regulated
Sus_scrofa___ENSSSCG00000043872	-2.17725	4.16691	19.2451	0.000174859	0.0110396	3	7	Down-regulated
Sus_scrofa___ENPP1	-1.46912	7.8135	19.0885	0.000182825	0.0114245	3	7	Down-regulated
Sus_scrofa___SIPA1L2	-1.2254	8.75637	19.0753	0.000183545	0.0114402	3	7	Down-regulated
Sus_scrofa___ENSSSCG00000031307	-1.77166	2.50677	19.0627	0.000185369	0.0115245	3	7	Down-regulated
Sus_scrofa___FOSB	-4.08922	1.55165	17.7468	0.000186029	0.0115362	3	7	Down-regulated
Sus_scrofa___ENSSSCG00000015036	-1.46199	4.21598	18.9662	0.000189947	0.0117493	3	7	Down-regulated
Sus_scrofa___NCF1	-2.0983	2.24275	18.8018	0.0002001	0.0121584	3	7	Down-regulated
Sus_scrofa___IRF8	-1.47986	2.92606	18.8086	0.000200542	0.0121584	3	7	Down-regulated
Sus_scrofa___CFAP221	-2.49414	0.687048	17.9788	0.000202074	0.0121908	3	7	Down-regulated
Sus_scrofa___MAML3	-1.53103	7.60316	18.6732	0.000207153	0.0124587	3	7	Down-regulated
Sus_scrofa___BAAT	-2.16086	1.96232	18.618	0.000207535	0.0124587	3	7	Down-regulated
Sus_scrofa___ENSSSCG00000008421	-3.59807	1.88666	18.2123	0.000213698	0.0126367	3	7	Down-regulated
Sus_scrofa___LPCAT3	-1.12255	5.01123	18.5548	0.000214798	0.0126367	3	7	Down-regulated
Sus_scrofa___ELL3	-3.75153	0.884374	17.4844	0.000220762	0.012935	3	7	Down-regulated
Sus_scrofa___ENSSSCG00000034665	-5.5796	0.23891	18.1575	0.000222657	0.0130121	3	7	Down-regulated
Sus_scrofa___ENSSSCG00000042614	-2.00249	1.96269	18.3601	0.000224662	0.0130121	3	7	Down-regulated
Sus_scrofa___GNPDA2	-1.00222	7.17708	18.4047	0.000224742	0.0130121	3	7	Down-regulated
Sus_scrofa___ENSSSCG00000039326	-3.60601	0.583174	17.5873	0.000226051	0.0130471	3	7	Down-regulated
Sus_scrofa___KLHL8	-1.1159	4.65916	18.3561	0.000228229	0.01309	3	7	Down-regulated
Sus_scrofa___ENSSSCG00000051032	-2.43702	0.92152	17.6435	0.000230707	0.013109	3	7	Down-regulated
Sus_scrofa___SLC9B2	-1.47695	9.03312	18.2913	0.000232644	0.0131884	3	7	Down-regulated
Sus_scrofa___MTSS2	-1.13334	5.45535	18.2716	0.000234103	0.0132404	3	7	Down-regulated
Sus_scrofa___CERS6	-1.35281	4.93378	18.1953	0.000239661	0.0133226	3	7	Down-regulated
Sus_scrofa___RBMS2	-1.08417	5.92769	18.1315	0.000244327	0.0134164	3	7	Down-regulated
Sus_scrofa___ASPN	-2.11128	6.26401	17.9811	0.000255873	0.013862	3	7	Down-regulated
Sus_scrofa___ENSSSCG00000014368	-2.29096	1.3154	17.7107	0.000257787	0.0139302	3	7	Down-regulated
Sus_scrofa___ENSSSCG00000050585	-1.971	3.14513	17.9349	0.000261041	0.0140176	3	7	Down-regulated
Sus_scrofa___SLC47A1	-1.0632	5.54831	17.8578	0.00026581	0.0141802	3	7	Down-regulated
Sus_scrofa___HLTF	-1.3203	6.56354	17.8288	0.000268158	0.0142743	3	7	Down-regulated
Sus_scrofa___ENSSSCG00000038786	-2.02711	1.48915	17.7235	0.000271185	0.014404	3	7	Down-regulated
Sus_scrofa___ENSSSCG00000015747	-2.33154	9.51641	17.7661	0.0002734	0.0144544	3	7	Down-regulated
Sus_scrofa___TUBB1	-2.6494	0.355745	16.8838	0.000276843	0.0145539	3	7	Down-regulated
Sus_scrofa___MCCC2	-1.4908	6.86766	17.7033	0.000278771	0.0145539	3	7	Down-regulated
Sus_scrofa___CCK	-2.93896	5.33996	17.6688	0.000282055	0.0146939	3	7	Down-regulated
Sus_scrofa___COQ8A	-1.15559	7.4612	17.6496	0.000283452	0.0147353	3	7	Down-regulated
Sus_scrofa___MRPL46	-1.09291	3.99346	17.6428	0.000284725	0.0147701	3	7	Down-regulated
Sus_scrofa___GABRG2	-2.64829	1.6249	17.3819	0.000293659	0.0150279	3	7	Down-regulated
Sus_scrofa___UCP2	-1.56822	3.09386	17.5334	0.000295603	0.0150306	3	7	Down-regulated
Sus_scrofa___STXBP6	-1.44848	8.22436	17.4511	0.000301505	0.0152204	3	7	Down-regulated
Sus_scrofa___TRIP6	-1.48676	2.31166	17.4271	0.000304818	0.0153243	3	7	Down-regulated
Sus_scrofa___ENSSSCG00000043152	-2.42361	1.34149	17.1324	0.000308545	0.0154165	3	7	Down-regulated
Sus_scrofa___MYBL1	-1.85345	3.06738	17.3884	0.000310092	0.0154622	3	7	Down-regulated
Sus_scrofa___CCDC152	-2.15899	2.02294	17.2777	0.000318684	0.0156984	3	7	Down-regulated
Sus_scrofa___ENSSSCG00000040651	-3.13972	0.5043	16.2999	0.000322078	0.0157434	3	7	Down-regulated
Sus_scrofa___ENSSSCG00000042688	-3.30431	2.46069	17.1317	0.000323526	0.0157434	3	7	Down-regulated
Sus_scrofa___HR	-1.8732	2.1759	17.2078	0.000326207	0.0157434	3	7	Down-regulated
Sus_scrofa___ENSSSCG00000048278	-1.6971	3.20097	17.2152	0.000326351	0.0157434	3	7	Down-regulated
Sus_scrofa___ALX4	-2.46957	-0.0224291	16.0534	0.00032709	0.0157434	3	7	Down-regulated
Sus_scrofa___ASB2	-1.42269	8.08076	17.1438	0.000331954	0.0157434	3	7	Down-regulated
Sus_scrofa___ATP2B1	-1.17761	5.71229	17.1442	0.00033196	0.0157434	3	7	Down-regulated
Sus_scrofa___LRRC49	-1.26916	4.30803	17.1087	0.000335938	0.0158762	3	7	Down-regulated
Sus_scrofa___GASK1B	-1.93527	5.92862	17.0802	0.000338734	0.015894	3	7	Down-regulated
Sus_scrofa___MRAS	-1.07388	7.46991	16.9764	0.000349931	0.0162545	3	7	Down-regulated
Sus_scrofa___ANKRD50	-1.45971	6.1437	16.9679	0.000350903	0.0162687	3	7	Down-regulated
Sus_scrofa___PLXNC1	-1.15329	3.87327	16.916	0.000357231	0.0164995	3	7	Down-regulated
Sus_scrofa___KCNIP2	-2.65114	5.24002	16.8537	0.000364542	0.0167108	3	7	Down-regulated
Sus_scrofa___ENSSSCG00000018046	-1.92622	3.39576	16.8493	0.000365976	0.0167425	3	7	Down-regulated
Sus_scrofa___TTC29	-1.94815	3.49236	16.819	0.000369419	0.0168396	3	7	Down-regulated
Sus_scrofa___ENSSSCG00000050245	-2.15031	3.06939	16.805	0.000371537	0.0168873	3	7	Down-regulated
Sus_scrofa___ENSSSCG00000044539	-2.33888	4.44126	16.789	0.000371849	0.0168873	3	7	Down-regulated
Sus_scrofa___TPGS2	-1.4709	5.1113	16.7591	0.000374993	0.016967	3	7	Down-regulated
Sus_scrofa___PLEKHA6	-1.57082	6.31823	16.7391	0.000377273	0.0169759	3	7	Down-regulated
Sus_scrofa___ENSSSCG00000003781	-3.05349	2.63436	16.6817	0.000378379	0.0169944	3	7	Down-regulated
Sus_scrofa___FYCO1	-1.04392	7.57532	16.6812	0.000384256	0.0171011	3	7	Down-regulated
Sus_scrofa___ENSSSCG00000046350	-2.24954	1.35635	16.4362	0.000392311	0.0173647	3	7	Down-regulated
Sus_scrofa___ENSSSCG00000045634	-2.65717	0.0636763	15.5786	0.000394217	0.0173861	3	7	Down-regulated
Sus_scrofa___VXN	-2.10813	3.15775	16.5959	0.000397031	0.0174159	3	7	Down-regulated
Sus_scrofa___OAZ3	-4.9529	1.71548	15.7264	0.000399751	0.0174894	3	7	Down-regulated
Sus_scrofa___ENSSSCG00000005529	-2.04067	1.03405	16.1413	0.000402785	0.0175449	3	7	Down-regulated
Sus_scrofa___SLC2A4	-1.47173	5.5438	16.4923	0.000408204	0.0177152	3	7	Down-regulated
Sus_scrofa___ENSSSCG00000048078	-2.12249	3.77787	16.4818	0.00041079	0.0177958	3	7	Down-regulated
Sus_scrofa___ENSSSCG00000040986	-2.21007	0.684458	15.9662	0.000411582	0.0177986	3	7	Down-regulated
Papio_anubis_SF3B1	-2.00269	3.84105	16.4488	0.000415538	0.0179379	3	7	Down-regulated
Sus_scrofa___HDAC6	-0.904501	5.08788	16.3966	0.000420957	0.0181078	3	7	Down-regulated
Sus_scrofa___TPM2	-1.43711	9.6394	16.3456	0.000427768	0.0183362	3	7	Down-regulated
Sus_scrofa___EFNB2	-3.71498	1.32431	15.7544	0.00042899	0.0183564	3	7	Down-regulated
Sus_scrofa___ADH1C	-2.54074	3.04007	16.3223	0.000432303	0.0184067	3	7	Down-regulated
Sus_scrofa___ENSSSCG00000051377	-4.69563	-0.599585	14.9118	0.000435154	0.0184906	3	7	Down-regulated
Sus_scrofa___ENSSSCG00000045597	-2.39604	0.225312	15.4286	0.000436914	0.0185011	3	7	Down-regulated
Sus_scrofa___UBXN11	-1.67511	3.5267	16.2768	0.000439362	0.0185405	3	7	Down-regulated
Sus_scrofa___B3GALT2	-1.76968	4.83878	16.1947	0.00044934	0.0188892	3	7	Down-regulated
Sus_scrofa___ENSSSCG00000005519	-2.6459	0.590508	15.5792	0.000449946	0.0188892	3	7	Down-regulated
Sus_scrofa___GRB14	-1.07004	6.93181	16.1672	0.00045306	0.0189873	3	7	Down-regulated
Sus_scrofa___CSTA	-1.89756	1.66745	16.0532	0.000456809	0.0190311	3	7	Down-regulated
Sus_scrofa___ENSSSCG00000051705	-2.44467	3.5329	16.0973	0.000465063	0.0192918	3	7	Down-regulated
Sus_scrofa___WEE2	-2.02522	2.43974	16.0554	0.000469375	0.0193591	3	7	Down-regulated
Sus_scrofa___MYLK	-2.67149	3.5246	16.0714	0.000469468	0.0193591	3	7	Down-regulated
Sus_scrofa___PCSK1	-2.82716	2.18937	15.9605	0.000470361	0.0193591	3	7	Down-regulated
Sus_scrofa___ASPDH	-2.0166	10.8745	16.046	0.000471133	0.0193591	3	7	Down-regulated
Sus_scrofa___ENSSSCG00000045756	-2.33969	0.246185	15.2117	0.000471438	0.0193591	3	7	Down-regulated
Sus_scrofa___ENSSSCG00000051373	-4.31625	-0.550048	14.6893	0.000473528	0.0194123	3	7	Down-regulated
Sus_scrofa___ENSSSCG00000034228	-3.02591	-0.363763	14.7405	0.000474506	0.0194198	3	7	Down-regulated
Sus_scrofa___FSHB	-3.40683	0.569024	15.4569	0.000477688	0.0194286	3	7	Down-regulated
Sus_scrofa___PRKAG3	-1.72616	4.10582	16.0061	0.000478205	0.0194286	3	7	Down-regulated
Sus_scrofa___NLGN1	-2.27421	5.43298	15.9966	0.000478906	0.0194286	3	7	Down-regulated
Sus_scrofa___ENSSSCG00000012047	-6.07787	-0.167912	16.1155	0.000483659	0.0194629	3	7	Down-regulated
Sus_scrofa___ENSSSCG00000036346	-5.92337	-0.00232653	15.2727	0.000487451	0.0194648	3	7	Down-regulated
Sus_scrofa___DCBLD2	-1.03746	5.23012	15.9214	0.000490671	0.0195572	3	7	Down-regulated
Sus_scrofa___LMCD1	-3.60209	6.86644	15.8841	0.00049659	0.0197288	3	7	Down-regulated
Sus_scrofa___DGKB	-1.53528	4.76241	15.8797	0.000497453	0.019731	3	7	Down-regulated
Sus_scrofa___ENSSSCG00000044211	-2.53686	2.16874	15.8473	0.000502062	0.0198427	3	7	Down-regulated
Sus_scrofa___SLC4A11	-2.69863	0.135711	14.9861	0.000503351	0.0198427	3	7	Down-regulated
Sus_scrofa___MARCHF11	-3.21934	0.636677	15.256	0.000515348	0.0201787	3	7	Down-regulated
Sus_scrofa___GABRA4	-1.2939	7.22563	15.7328	0.000521624	0.0203918	3	7	Down-regulated
Sus_scrofa___OIP5	-2.36003	3.6836	15.7225	0.000525202	0.0204661	3	7	Down-regulated
Sus_scrofa___LSR	-1.90217	1.81129	15.6766	0.000527744	0.0204998	3	7	Down-regulated
Sus_scrofa___HTR1F	-2.05829	0.630639	15.172	0.000531845	0.020605	3	7	Down-regulated
Sus_scrofa___SMYD3	-2.23598	9.69207	15.6456	0.000536698	0.0207487	3	7	Down-regulated
Sus_scrofa___ENSSSCG00000045412	-2.51037	4.35486	15.6073	0.000544201	0.0210031	3	7	Down-regulated
Sus_scrofa___ENSSSCG00000043111	-2.25425	1.02582	15.3081	0.000548096	0.0210122	3	7	Down-regulated
Sus_scrofa___ADH4	-2.12927	1.2876	15.2992	0.000549587	0.0210122	3	7	Down-regulated
Sus_scrofa___ENSSSCG00000035105	-2.37616	2.35092	15.5992	0.000549982	0.0210122	3	7	Down-regulated
Sus_scrofa___SERTAD2	-1.16514	7.50062	15.5709	0.000549987	0.0210122	3	7	Down-regulated
Sus_scrofa___NHSL2	-1.56088	3.03022	15.5858	0.000550396	0.0210122	3	7	Down-regulated
Sus_scrofa___LRRTM3	-2.15321	10.0261	15.5542	0.000553006	0.0210461	3	7	Down-regulated
Sus_scrofa___GAS7	-2.46267	1.68966	15.3794	0.000560699	0.0212067	3	7	Down-regulated
Sus_scrofa___LNP1	-2.62533	3.34021	15.445	0.000573989	0.0215631	3	7	Down-regulated
Sus_scrofa___SLC9A5	-1.84196	1.70039	15.3873	0.000574435	0.0215631	3	7	Down-regulated
Sus_scrofa___RGS2	-4.41451	1.26369	14.5098	0.000575539	0.0215631	3	7	Down-regulated
Sus_scrofa___RBFOX1	-1.13052	9.32465	15.3715	0.000587237	0.0218555	3	7	Down-regulated
Sus_scrofa___BMP5	-1.59338	6.29613	15.3695	0.00058769	0.0218555	3	7	Down-regulated
Sus_scrofa___TXNDC16	-1.10207	7.20443	15.3466	0.000592102	0.0219861	3	7	Down-regulated
Sus_scrofa___GJB1	-2.20204	1.61753	15.2776	0.000595002	0.0220602	3	7	Down-regulated
Sus_scrofa___AUTS2	-1.53311	8.88494	15.3267	0.000595983	0.0220631	3	7	Down-regulated
Sus_scrofa___PAPLN	-2.59607	0.0315346	14.1567	0.00062485	0.0226849	3	7	Down-regulated
Sus_scrofa___HCLS1	-2.17103	6.51144	15.1791	0.000625847	0.0226874	3	7	Down-regulated
Sus_scrofa___IFN-ALPHA-8	-2.28488	1.06391	14.8581	0.000630367	0.0227531	3	7	Down-regulated
Sus_scrofa___ENSSSCG00000048970	-3.27653	0.20127	14.0471	0.000630453	0.0227531	3	7	Down-regulated
Sus_scrofa___RNF11	-0.799433	6.74679	15.1339	0.000635257	0.0228926	3	7	Down-regulated
Sus_scrofa___ADAMTSL4	-2.01774	3.19186	15.103	0.000645247	0.0231739	3	7	Down-regulated
Sus_scrofa___ENSSSCG00000044095	-2.89294	-0.126053	14.1088	0.000645907	0.0231739	3	7	Down-regulated
Sus_scrofa___IGSF1	-2.48763	1.26619	14.6808	0.000650548	0.0233062	3	7	Down-regulated
Sus_scrofa___ASTN2	-1.49661	3.58417	15.058	0.000653245	0.0233344	3	7	Down-regulated
Sus_scrofa___ENSSSCG00000050070	-3.4331	0.191964	14.2919	0.000656614	0.0233864	3	7	Down-regulated
Sus_scrofa___KIFC2	-3.13983	0.261956	14.3153	0.000667201	0.0236944	3	7	Down-regulated
Sus_scrofa___SEMA3C	-1.30567	9.22605	14.9521	0.00067484	0.0238616	3	7	Down-regulated
Sus_scrofa___ENSSSCG00000035826	-3.73126	0.520128	14.1629	0.000682919	0.0241124	3	7	Down-regulated
Sus_scrofa___HABP2	-2.21263	2.26294	14.9026	0.000690188	0.0242638	3	7	Down-regulated
Sus_scrofa___ENSSSCG00000023691	-4.87302	-0.27783	14.3231	0.000693317	0.0243388	3	7	Down-regulated
Sus_scrofa___TBX20	-1.16878	7.86162	14.7981	0.000710502	0.024835	3	7	Down-regulated
Sus_scrofa___SAXO1	-2.39006	1.66786	14.7143	0.000717052	0.0249725	3	7	Down-regulated
Sus_scrofa___GLS	-0.890918	8.78779	14.7548	0.000720869	0.0250527	3	7	Down-regulated
Sus_scrofa___MYOCD	-1.19221	10.4514	14.7507	0.000721856	0.0250527	3	7	Down-regulated
Sus_scrofa___ASB11	-2.13897	4.7444	14.7522	0.000723045	0.0250584	3	7	Down-regulated
Sus_scrofa___ENSSSCG00000042694	-1.97904	4.69091	14.6912	0.000737057	0.0253064	3	7	Down-regulated
Sus_scrofa___GRIP2	-2.53363	5.60217	14.6891	0.000737191	0.0253064	3	7	Down-regulated
Sus_scrofa___ENSSSCG00000046361	-3.12344	0.213461	13.8549	0.00073776	0.0253064	3	7	Down-regulated
Sus_scrofa___PTPN4	-1.03613	9.19107	14.6809	0.000738977	0.0253064	3	7	Down-regulated
Sus_scrofa___TINAG	-4.30465	4.24599	14.6036	0.00073914	0.0253064	3	7	Down-regulated
Sus_scrofa___SYNM	-1.28507	6.63304	14.6629	0.000743486	0.0253544	3	7	Down-regulated
Sus_scrofa___SMC1B	-1.91811	4.39808	14.6486	0.000747927	0.0254514	3	7	Down-regulated
Sus_scrofa___GFM1	-1.06014	8.25718	14.615	0.000755541	0.0256747	3	7	Down-regulated
Sus_scrofa___FHL2	-1.51752	11.172	14.6104	0.000756712	0.0256788	3	7	Down-regulated
Sus_scrofa___SLC38A3	-2.11147	2.25232	14.5529	0.000763038	0.0258135	3	7	Down-regulated
Sus_scrofa___METTL11B	-2.41559	1.3659	14.315	0.000764906	0.0258135	3	7	Down-regulated
Sus_scrofa___DDI1	-3.38866	3.24532	14.4894	0.000782426	0.0262999	3	7	Down-regulated
Sus_scrofa___FAM135B	-1.37497	2.30994	14.5223	0.000782549	0.0262999	3	7	Down-regulated
Sus_scrofa___CAMKV	-4.82953	-0.212176	13.8076	0.000789481	0.0264964	3	7	Down-regulated
Sus_scrofa___TRPC4	-1.72197	3.75219	14.4803	0.000792672	0.0265117	3	7	Down-regulated
Sus_scrofa___NPY2R	-4.43327	-0.565491	13.3912	0.000793013	0.0265117	3	7	Down-regulated
Sus_scrofa___ENSSSCG00000047860	-1.33296	4.52539	14.4725	0.00079319	0.0265117	3	7	Down-regulated
Sus_scrofa___LRRN1	-5.31202	-0.313306	13.9684	0.000800513	0.0267199	3	7	Down-regulated
Sus_scrofa___LRRC9	-1.98254	6.84061	14.4366	0.00080247	0.0267373	3	7	Down-regulated
Sus_scrofa___CPNE3	-1.08733	9.30203	14.4337	0.000803224	0.0267373	3	7	Down-regulated
Sus_scrofa___ENSSSCG00000050759	-3.16352	2.68664	14.3976	0.000807759	0.0268152	3	7	Down-regulated
Sus_scrofa___TP63	-2.30926	5.94413	14.3835	0.00081714	0.0270898	3	7	Down-regulated
Sus_scrofa___MMRN2	-2.80678	0.843595	13.716	0.000818431	0.0270958	3	7	Down-regulated
Sus_scrofa___IQCH	-1.21434	4.717	14.354	0.000825547	0.0271552	3	7	Down-regulated
Sus_scrofa___ENSSSCG00000035477	-1.78139	3.1003	14.3372	0.000833773	0.0272412	3	7	Down-regulated
Sus_scrofa___ENSSSCG00000043191	-2.9065	0.617312	13.7122	0.000833962	0.0272412	3	7	Down-regulated
Sus_scrofa___MCTP2	-1.24661	2.59371	14.3257	0.000838618	0.0272993	3	7	Down-regulated
Sus_scrofa___ENSSSCG00000039961	-3.06335	0.191093	13.6426	0.000842239	0.0273239	3	7	Down-regulated
Sus_scrofa___DEPDC4	-4.59895	-0.131587	13.6372	0.000845136	0.0273239	3	7	Down-regulated
Sus_scrofa___EDIL3	-1.92756	6.83021	14.2566	0.000852997	0.0275314	3	7	Down-regulated
Sus_scrofa___SMPD4	-0.855938	4.48359	14.2192	0.000864542	0.0277657	3	7	Down-regulated
Sus_scrofa___RPL22	-1.21169	6.44009	14.2008	0.000869368	0.0278757	3	7	Down-regulated
Sus_scrofa___TNFRSF12A	-3.05876	0.318781	13.2502	0.000873887	0.0279839	3	7	Down-regulated
Sus_scrofa___VIPR2	-1.18532	3.39967	14.1452	0.000888737	0.0282315	3	7	Down-regulated
Sus_scrofa___PLSCR3	-1.73097	2.06564	14.1305	0.000889626	0.0282315	3	7	Down-regulated
Sus_scrofa___DLG2	-2.31923	6.57005	14.1321	0.000889979	0.0282315	3	7	Down-regulated
Papio_anubis_ENSPANG00000005105	-3.30294	0.205719	13.263	0.000892479	0.0282315	3	7	Down-regulated
Sus_scrofa___ENSSSCG00000010968	-1.20935	4.46857	14.1173	0.000895116	0.0282505	3	7	Down-regulated
Sus_scrofa___ENSSSCG00000046535	-1.94946	1.17921	13.9468	0.000907644	0.0285779	3	7	Down-regulated
Sus_scrofa___SORCS1	-1.38696	2.81888	14.0789	0.000912104	0.0286445	3	7	Down-regulated
Sus_scrofa___SP4	-0.719236	5.22182	14.0519	0.000914809	0.0286926	3	7	Down-regulated
Sus_scrofa___ZNF804B	-2.04106	8.9128	14.0238	0.000923502	0.0289281	3	7	Down-regulated
Sus_scrofa___SRSF5	-1.00522	7.31054	14.0011	0.000930714	0.0290857	3	7	Down-regulated
Sus_scrofa___FSD2	-2.00408	6.34247	14.0007	0.000930914	0.0290857	3	7	Down-regulated
Sus_scrofa___TVP23A	-1.48209	3.17592	13.9997	0.00093493	0.0290996	3	7	Down-regulated
Sus_scrofa___C21orf91	-1.33303	6.14315	13.9651	0.000942302	0.0292545	3	7	Down-regulated
Sus_scrofa___ENSSSCG00000037566	-3.66493	-0.186459	13.0044	0.000952393	0.0293854	3	7	Down-regulated
Sus_scrofa___KLHL32	-1.17264	7.30412	13.9296	0.000953804	0.0293875	3	7	Down-regulated
Sus_scrofa___EPHA1	-2.58188	0.784736	13.4927	0.000981592	0.0300931	3	7	Down-regulated
Sus_scrofa___ENSSSCG00000048533	-2.31259	2.39036	13.8513	0.000982482	0.0300931	3	7	Down-regulated
Papio_anubis_ACTC1	-2.66996	0.0223774	12.9953	0.000984865	0.0300931	3	7	Down-regulated
Sus_scrofa___ENSSSCG00000033896	-4.62308	-0.353303	13.1123	0.00098707	0.0300931	3	7	Down-regulated
Sus_scrofa___PAXBP1	-0.804488	7.4438	13.8287	0.000987471	0.0300931	3	7	Down-regulated
Sus_scrofa___FAM184B	-1.44968	4.56861	13.7969	0.000998879	0.0303557	3	7	Down-regulated
Sus_scrofa___MYL1	-3.85166	2.07773	13.5916	0.00100065	0.0303557	3	7	Down-regulated
Sus_scrofa___ENSSSCG00000044044	-2.61038	1.26419	13.5467	0.00100961	0.0305672	3	7	Down-regulated
Sus_scrofa___WNK2	-0.91236	7.86671	13.7422	0.00101736	0.030688	3	7	Down-regulated
Sus_scrofa___AP3B2	-1.41481	2.45698	13.755	0.00102	0.0307294	3	7	Down-regulated
Sus_scrofa___OGN	-1.69833	3.13675	13.7425	0.00102147	0.030736	3	7	Down-regulated
Sus_scrofa___C3orf49	-2.5838	1.0122	13.1663	0.00104659	0.0311087	3	7	Down-regulated
Sus_scrofa___CSKMT	-1.73342	1.32011	13.5206	0.00105043	0.0311847	3	7	Down-regulated
Sus_scrofa___ENSSSCG00000049009	-3.55954	-0.11492	12.8683	0.00105761	0.0313361	3	7	Down-regulated
Sus_scrofa___KCNA4	-2.1177	3.43916	13.6383	0.00105809	0.0313361	3	7	Down-regulated
Sus_scrofa___ENSSSCG00000046959	-3.85693	2.20419	13.3166	0.0010818	0.031807	3	7	Down-regulated
Sus_scrofa___CPXM2	-1.63296	3.32456	13.564	0.00108615	0.0318583	3	7	Down-regulated
Sus_scrofa___LMOD1	-1.48194	2.99931	13.551	0.0010922	0.0319972	3	7	Down-regulated
Sus_scrofa___LAMB2	-1.4133	4.05614	13.5348	0.0010951	0.032037	3	7	Down-regulated
Sus_scrofa___ENSSSCG00000017061	-3.9275	-0.177299	12.6944	0.00109618	0.032037	3	7	Down-regulated
Papio_anubis_TPM2	-2.25292	3.17555	13.5048	0.00110853	0.0322436	3	7	Down-regulated
Sus_scrofa___OSBPL6	-1.79565	2.80219	13.421	0.00114178	0.0329758	3	7	Down-regulated
Sus_scrofa___CA14	-2.23099	4.08303	13.4096	0.00114458	0.0330173	3	7	Down-regulated
Sus_scrofa___DYNC2I2	-1.37909	3.90377	13.3527	0.00116654	0.0335315	3	7	Down-regulated
Sus_scrofa___CHN1	-1.01242	8.26372	13.2874	0.00119159	0.0340586	3	7	Down-regulated
Sus_scrofa___SLC7A7	-1.44061	3.499	13.2951	0.00119183	0.0340586	3	7	Down-regulated
Sus_scrofa___ENSSSCG00000041316	-2.5341	1.44188	13.1722	0.00119409	0.0340833	3	7	Down-regulated
Sus_scrofa___CDH1	-2.08908	1.82866	13.167	0.00120238	0.0342799	3	7	Down-regulated
Sus_scrofa___NAV2	-1.26238	9.71516	13.2535	0.00120579	0.0343368	3	7	Down-regulated
Sus_scrofa___SNX7	-1.67378	3.56497	13.255	0.00120826	0.0343673	3	7	Down-regulated
Sus_scrofa___GGCX	-2.10752	6.55051	13.2339	0.00121418	0.0344154	3	7	Down-regulated
Sus_scrofa___PHYHIPL	-2.61848	1.88177	13.1643	0.00121787	0.0344426	3	7	Down-regulated
Sus_scrofa___TRDN	-1.55403	10.2526	13.2237	0.00121846	0.0344426	3	7	Down-regulated
Sus_scrofa___PDE4D	-0.96108	13.3306	13.2191	0.00122044	0.0344426	3	7	Down-regulated
Sus_scrofa___RYR2	-0.97515	13.6892	13.1613	0.00124543	0.0349731	3	7	Down-regulated
Papio_anubis_SRSF5	-1.65629	1.91306	13.0768	0.00124817	0.0349731	3	7	Down-regulated
Sus_scrofa___CPNE4	-1.23733	2.9101	13.1603	0.00125143	0.0349842	3	7	Down-regulated
Sus_scrofa___SLC24A4	-1.20395	4.36221	13.1285	0.00126129	0.0352194	3	7	Down-regulated
Sus_scrofa___CCDC173	-1.43046	3.15974	13.1257	0.00126577	0.0352639	3	7	Down-regulated
Sus_scrofa___BEST2	-2.15183	2.51674	13.1091	0.00127449	0.0353795	3	7	Down-regulated
Sus_scrofa___GDPD2	-2.5755	3.02433	13.0711	0.00127538	0.0353795	3	7	Down-regulated
Sus_scrofa___ENSSSCG00000013530	-1.64989	3.20838	13.1046	0.00127571	0.0353795	3	7	Down-regulated
Sus_scrofa___UQCRQ	-1.28606	6.32684	13.0845	0.00127959	0.0353975	3	7	Down-regulated
Sus_scrofa___PDLIM7	-0.872809	6.83778	13.0797	0.00128171	0.0353975	3	7	Down-regulated
Sus_scrofa___SEMA4C	-1.93935	1.74953	13.0126	0.00128215	0.0353975	3	7	Down-regulated
Sus_scrofa___APOBEC1	-2.80739	0.117606	12.4786	0.00129265	0.0356069	3	7	Down-regulated
Sus_scrofa___CYP2C42	-1.1744	4.13565	13.0373	0.00130212	0.0357219	3	7	Down-regulated
Sus_scrofa___SCARF1	-1.20575	5.13503	13.0343	0.00130267	0.0357219	3	7	Down-regulated
Sus_scrofa___ENSSSCG00000040897	-1.83251	1.91025	12.9743	0.00131948	0.0360615	3	7	Down-regulated
Sus_scrofa___ENSSSCG00000041634	-2.46742	1.05373	12.7726	0.00132767	0.0362445	3	7	Down-regulated
Sus_scrofa___ENSSSCG00000044266	-1.93129	2.5401	12.975	0.00133365	0.0362863	3	7	Down-regulated
Sus_scrofa___NSUN6	-1.21261	6.73962	12.9478	0.00134274	0.0364525	3	7	Down-regulated
Sus_scrofa___FGF2	-1.02213	4.59404	12.9426	0.00134578	0.0364943	3	7	Down-regulated
Sus_scrofa___NOVA1	-1.36556	6.24551	12.9379	0.00134751	0.0365008	3	7	Down-regulated
Sus_scrofa___EGFL8	-4.01323	-0.537977	11.9527	0.00135071	0.0365468	3	7	Down-regulated
Sus_scrofa___TECRL	-1.082	10.7163	12.9211	0.00135544	0.0365939	3	7	Down-regulated
Sus_scrofa___IMMP2L	-0.808938	8.76146	12.8857	0.00137257	0.0369745	3	7	Down-regulated
Sus_scrofa___NDUFB3	-0.78745	5.82511	12.8713	0.0013797	0.0370849	3	7	Down-regulated
Sus_scrofa___ENSSSCG00000010310	-1.23539	3.29979	12.8517	0.00139373	0.0372967	3	7	Down-regulated
Sus_scrofa___HADHA	-1.23948	8.02814	12.8404	0.00139475	0.0372967	3	7	Down-regulated
Sus_scrofa___CIDEC	-2.0591	1.31801	12.7465	0.00139676	0.0372967	3	7	Down-regulated
Sus_scrofa___DSTN	-1.52045	7.53817	12.8356	0.00139716	0.0372967	3	7	Down-regulated
Sus_scrofa___PHEX	-1.08006	7.04028	12.834	0.00139794	0.0372967	3	7	Down-regulated
Sus_scrofa___ENSSSCG00000046452	-1.20027	5.67641	12.8244	0.00140284	0.0372967	3	7	Down-regulated
Sus_scrofa___ENSSSCG00000048864	-2.4711	2.89909	12.8169	0.00140653	0.037354	3	7	Down-regulated
Sus_scrofa___ENSSSCG00000042409	-1.61603	2.08694	12.8085	0.00141161	0.0374483	3	7	Down-regulated
Sus_scrofa___ENSSSCG00000043232	-3.68074	1.23807	12.5296	0.00142584	0.0377847	3	7	Down-regulated
Sus_scrofa___NDUFB2	-0.761411	5.36757	12.7728	0.00142887	0.037794	3	7	Down-regulated
Sus_scrofa___ARMC2	-1.41834	7.61378	12.7685	0.00143083	0.037794	3	7	Down-regulated
Sus_scrofa___OCIAD2	-1.73552	5.86204	12.7431	0.00144394	0.038058	3	7	Down-regulated
Sus_scrofa___ENSSSCG00000015806	-1.68447	0.595894	12.4301	0.00144803	0.0381248	3	7	Down-regulated
Sus_scrofa___ENSSSCG00000047631	-3.98245	-0.780366	11.8772	0.00145126	0.0381275	3	7	Down-regulated
Sus_scrofa___ENSSSCG00000044214	-4.45374	-0.298911	12.044	0.00145454	0.0381661	3	7	Down-regulated
Papio_anubis_GRIA1	-4.30787	-0.730339	11.7346	0.00147545	0.0385147	3	7	Down-regulated
Sus_scrofa___ENSSSCG00000033328	-2.72245	1.53433	12.5676	0.00147936	0.0385537	3	7	Down-regulated
Sus_scrofa___SLC51A	-2.36831	1.21329	12.5044	0.0014801	0.0385537	3	7	Down-regulated
Sus_scrofa___SRARP	-3.52608	-0.307693	11.8074	0.00148457	0.0385811	3	7	Down-regulated
Sus_scrofa___ENSSSCG00000032625	-1.96594	0.696416	12.3745	0.00148716	0.0385811	3	7	Down-regulated
Sus_scrofa___CCDC141	-0.961435	10.1597	12.6039	0.00151724	0.0391041	3	7	Down-regulated
Sus_scrofa___TLCD3B	-1.60953	2.16756	12.6039	0.00152349	0.0391425	3	7	Down-regulated
Sus_scrofa___STRIP2	-0.866187	6.65319	12.5895	0.00152511	0.0391425	3	7	Down-regulated
Sus_scrofa___ELP1	-0.621734	5.32042	12.5875	0.00152639	0.0391425	3	7	Down-regulated
Sus_scrofa___TACR3	-2.72689	0.559906	12.1594	0.00152781	0.0391425	3	7	Down-regulated
Sus_scrofa___ENSSSCG00000046012	-3.20308	-0.0375188	11.9449	0.00152834	0.0391425	3	7	Down-regulated
Sus_scrofa___TRIM9	-1.33567	1.95377	12.5584	0.00153912	0.0393774	3	7	Down-regulated
Sus_scrofa___KCNJ3	-0.850199	9.82396	12.5593	0.0015416	0.0393995	3	7	Down-regulated
Papio_anubis_PNISR	-1.25327	4.05246	12.557	0.00154486	0.0394004	3	7	Down-regulated
Sus_scrofa___C12orf56	-1.40036	2.31182	12.5502	0.00154697	0.039413	3	7	Down-regulated
Sus_scrofa___SETD9	-1.05017	4.25702	12.5356	0.0015557	0.039553	3	7	Down-regulated
Sus_scrofa___PIF1	-2.74673	-0.132668	11.7683	0.00157281	0.0397781	3	7	Down-regulated
Sus_scrofa___LXN	-2.42489	1.54178	12.412	0.0015856	0.0398569	3	7	Down-regulated
Sus_scrofa___MTARC2	-0.874834	6.67387	12.4711	0.00159112	0.0399546	3	7	Down-regulated
Sus_scrofa___TMEM71	-3.64252	1.21337	11.8171	0.00159336	0.0399697	3	7	Down-regulated
Sus_scrofa___SRF	-1.10176	4.27257	12.4632	0.00159695	0.0400187	3	7	Down-regulated
Sus_scrofa___ENSSSCG00000040109	-0.982734	10.665	12.4538	0.00160102	0.0400797	3	7	Down-regulated
Sus_scrofa___ENSSSCG00000042899	-4.13409	-0.743069	11.6453	0.00160672	0.0401097	3	7	Down-regulated
Sus_scrofa___HACD1	-1.054	7.49111	12.4313	0.00161402	0.0402402	3	7	Down-regulated
Sus_scrofa___SPINK8	-1.76738	4.99461	12.4216	0.00162007	0.0403087	3	7	Down-regulated
Sus_scrofa___CPED1	-1.96065	9.19282	12.4027	0.00163065	0.0404074	3	7	Down-regulated
Sus_scrofa___AMPH	-2.65441	3.1703	12.4089	0.00163409	0.0404107	3	7	Down-regulated
Sus_scrofa___TMPRSS12	-1.69488	2.10805	12.372	0.00164712	0.0406505	3	7	Down-regulated
Sus_scrofa___IRX2	-4.37271	0.624155	11.8382	0.00166037	0.040895	3	7	Down-regulated
Sus_scrofa___NELL1	-1.31227	4.42712	12.349	0.00166348	0.0409093	3	7	Down-regulated
Sus_scrofa___MICU1	-0.603688	7.50237	12.3326	0.00167231	0.0410235	3	7	Down-regulated
Sus_scrofa___NT5C1A	-1.22873	4.04463	12.3317	0.00167528	0.0410552	3	7	Down-regulated
Sus_scrofa___CYCS	-0.849246	5.12064	12.3249	0.00167738	0.0410654	3	7	Down-regulated
Sus_scrofa___STYXL2	-1.36454	7.28474	12.2952	0.00169504	0.0413321	3	7	Down-regulated
Sus_scrofa___SEMA5A	-1.18706	9.02957	12.2859	0.00170066	0.0413867	3	7	Down-regulated
Sus_scrofa___TMEM120B	-1.1287	6.76338	12.2815	0.00170343	0.0414128	3	7	Down-regulated
Sus_scrofa___NLRP4	-2.31201	1.23309	11.9324	0.00170874	0.0414163	3	7	Down-regulated
Sus_scrofa___ENSSSCG00000039519	-3.18275	0.156135	11.7037	0.00170925	0.0414163	3	7	Down-regulated
Sus_scrofa___DPP6	-1.00762	3.70636	12.2753	0.00170972	0.0414163	3	7	Down-regulated
Sus_scrofa___SWT1	-1.17643	7.69052	12.2702	0.00171035	0.0414163	3	7	Down-regulated
Sus_scrofa___ENSSSCG00000043628	-1.7259	3.71944	12.2664	0.00171627	0.0414405	3	7	Down-regulated
Sus_scrofa___SDHD	-0.682448	5.15609	12.2608	0.00171644	0.0414405	3	7	Down-regulated
Sus_scrofa___AKAP3	-1.094	5.14699	12.2534	0.00172104	0.0414741	3	7	Down-regulated
Sus_scrofa___ENSSSCG00000051445	-2.03115	1.19547	12.1354	0.00172608	0.0415092	3	7	Down-regulated
Sus_scrofa___ACSM3	-1.53592	2.79665	12.2515	0.00172961	0.0415532	3	7	Down-regulated
Sus_scrofa___SAMSN1	-2.59854	1.30129	12.0326	0.00173982	0.0417464	3	7	Down-regulated
Sus_scrofa___ENSSSCG00000033189	-1.00686	4.78388	12.2061	0.00175109	0.0418635	3	7	Down-regulated
Sus_scrofa___PROS1	-1.11701	7.50799	12.2	0.00175427	0.0418984	3	7	Down-regulated
Sus_scrofa___ANGPTL5	-3.7001	-0.80606	11.6587	0.00175755	0.0419356	3	7	Down-regulated
Sus_scrofa___CCBE1	-1.19423	8.55952	12.1615	0.00177889	0.0422843	3	7	Down-regulated
Sus_scrofa___ENSSSCG00000027921	-2.16339	0.891426	11.9223	0.00179403	0.0424658	3	7	Down-regulated
Sus_scrofa___CYTIP	-2.3778	4.78758	12.1307	0.00180081	0.0425524	3	7	Down-regulated
Sus_scrofa___FAM151A	-2.29594	1.91316	11.9882	0.00182684	0.042865	3	7	Down-regulated
Sus_scrofa___PANK4	-1.42558	4.31	12.0786	0.00183562	0.042865	3	7	Down-regulated
Sus_scrofa___KLHL35	-3.08497	-0.492857	11.1582	0.00183809	0.042865	3	7	Down-regulated
Sus_scrofa___ENSSSCG00000032383	-1.51598	5.70333	12.0712	0.00183829	0.042865	3	7	Down-regulated
Sus_scrofa___CD36	-1.34603	9.61164	12.0681	0.00184019	0.042865	3	7	Down-regulated
Sus_scrofa___RAB27A	-1.62349	2.27271	12.0847	0.00184036	0.042865	3	7	Down-regulated
Sus_scrofa___ATP10D	-1.33676	5.86516	12.0538	0.00184994	0.0429654	3	7	Down-regulated
Sus_scrofa___ADGRL4	-4.94679	-0.531134	11.3715	0.00185918	0.043139	3	7	Down-regulated
Sus_scrofa___TP53INP2	-1.29666	3.77323	12.0406	0.0018612	0.0431449	3	7	Down-regulated
Sus_scrofa___ENSSSCG00000040091	-4.52487	-0.311081	11.4257	0.00188277	0.0436035	3	7	Down-regulated
Sus_scrofa___CLASP2	-0.830411	7.54128	11.998	0.00188772	0.0436097	3	7	Down-regulated
Sus_scrofa___CD320	-1.6243	1.04748	11.7305	0.00189083	0.0436248	3	7	Down-regulated
Sus_scrofa___RAMP1	-0.992562	7.80443	11.9858	0.00189611	0.0437053	3	7	Down-regulated
Sus_scrofa___CDH18	-1.91975	6.11786	11.9436	0.00192564	0.0440858	3	7	Down-regulated
Sus_scrofa___ENSSSCG00000034597	-1.76469	1.56552	11.922	0.00193207	0.044118	3	7	Down-regulated
Sus_scrofa___CMKLR1	-5.39911	-0.0961202	12.0871	0.00193763	0.0442035	3	7	Down-regulated
Sus_scrofa___ENSSSCG00000044745	-2.75651	2.0755	11.8326	0.00194302	0.0442852	3	7	Down-regulated
Sus_scrofa___WNT9B	-1.98015	1.76968	11.8725	0.00194776	0.044322	3	7	Down-regulated
Sus_scrofa___ENSSSCG00000040615	-0.950676	3.22025	11.9191	0.00194826	0.044322	3	7	Down-regulated
Sus_scrofa___ENTPD5	-1.0537	3.90092	11.9094	0.00195221	0.0443705	3	7	Down-regulated
Sus_scrofa___TMEM178A	-2.25423	2.83998	11.8963	0.00196689	0.0446256	3	7	Down-regulated
Sus_scrofa___MAPRE2	-1.43801	8.58012	11.8678	0.00197947	0.0448648	3	7	Down-regulated
Sus_scrofa___SLC4A5	-1.5053	2.21351	11.8632	0.00199157	0.0450557	3	7	Down-regulated
Sus_scrofa___RGS5	-3.21633	0.0832402	11.2538	0.00202354	0.0454839	3	7	Down-regulated
Sus_scrofa___EYA4	-2.89944	5.7922	11.8037	0.00202696	0.045519	3	7	Down-regulated
Sus_scrofa___NEBL	-0.95781	12.5272	11.7699	0.00205168	0.0458216	3	7	Down-regulated
Sus_scrofa___PIK3C2G	-1.19997	2.74658	11.7416	0.00208205	0.046323	3	7	Down-regulated
Sus_scrofa___KCNRG	-1.88331	2.13004	11.7267	0.00209295	0.0464039	3	7	Down-regulated
Sus_scrofa___C7	-2.79977	0.333214	11.183	0.0021053	0.0466354	3	7	Down-regulated
Sus_scrofa___CNGA3	-2.71228	1.33067	11.5547	0.00211	0.0466971	3	7	Down-regulated
Sus_scrofa___PIGQ	-0.872456	5.01926	11.6745	0.00212533	0.0469088	3	7	Down-regulated
Sus_scrofa___SCUBE3	-1.55345	3.80751	11.6405	0.00215428	0.0473341	3	7	Down-regulated
Sus_scrofa___ENSSSCG00000022044	-0.809418	6.38117	11.6259	0.00216323	0.047488	3	7	Down-regulated
Sus_scrofa___ENSSSCG00000034367	-1.94048	2.36012	11.6267	0.00216865	0.0475405	3	7	Down-regulated
Sus_scrofa___ING5	-0.732055	4.0952	11.6162	0.00217275	0.0475405	3	7	Down-regulated
Sus_scrofa___SOX10	-1.52641	4.14582	11.6038	0.00218282	0.0475762	3	7	Down-regulated
Sus_scrofa___CDH8	-1.42237	6.82505	11.5717	0.00220695	0.0480101	3	7	Down-regulated
Sus_scrofa___PLEK	-1.19395	3.24882	11.5351	0.00224288	0.0485713	3	7	Down-regulated
Sus_scrofa___IFN-DELTA-1	-3.51852	0.344696	11.0442	0.00224438	0.0485713	3	7	Down-regulated
Sus_scrofa___ENSSSCG00000037370	-3.24758	1.19116	11.2942	0.00225484	0.048712	3	7	Down-regulated
Sus_scrofa___LRRTM2	-1.86546	1.00061	11.3482	0.00225523	0.048712	3	7	Down-regulated
Sus_scrofa___SORCS3	-1.30014	2.1443	11.5225	0.00225687	0.048712	3	7	Down-regulated
Sus_scrofa___OSTN	-1.60588	1.23195	11.4108	0.00226229	0.0487507	3	7	Down-regulated
Sus_scrofa___MYO7A	-1.08026	2.97384	11.4834	0.00228819	0.049171	3	7	Down-regulated
Sus_scrofa___ENSSSCG00000044974	-4.22218	-0.610521	10.6768	0.00232017	0.0498077	3	7	Down-regulated
Sus_scrofa___PDZRN4	-2.90541	5.04209	11.4233	0.0023327	0.049908	3	7	Down-regulated
Sus_scrofa___PRKRA	-1.17737	3.02081	11.4256	0.00233825	0.0499592	3	7	Down-regulated
Sus_scrofa___ATOH8	-1.85851	3.92869	11.415	0.00234123	0.0499592	3	7	Down-regulated

## Sheet: Hypoxia_vCM
Gene	logFC	logCPM	F	PValue	FDR	Observations_PCMV/PRV	Observations_3month_protocol	level
Sus_scrofa___MX2	7.59408	4.97917	81.4931	4.82361e-11	1.18679e-06	3	7	Up-regulated
Sus_scrofa___FOXS1	6.87138	3.92787	75.0256	8.72483e-10	6.04963e-06	3	7	Up-regulated
Sus_scrofa___SETX	2.41311	6.31903	82.9116	9.69919e-10	6.04963e-06	3	7	Up-regulated
Sus_scrofa___ENSSSCG00000011559	1.98131	5.37868	79.6035	1.47663e-09	7.3681e-06	3	7	Up-regulated
Sus_scrofa___MOSPD1	1.81483	5.73659	71.436	4.4021e-09	1.83047e-05	3	7	Up-regulated
Sus_scrofa___MMP25	4.10228	3.49905	62.7162	5.2441e-09	1.86907e-05	3	7	Up-regulated
Sus_scrofa___ENSSSCG00000016263	4.21691	3.50347	58.047	9.38133e-09	2.72892e-05	3	7	Up-regulated
Sus_scrofa___TRAF3IP2	1.80293	6.65571	65.8289	9.84421e-09	2.72892e-05	3	7	Up-regulated
Sus_scrofa___PARP3	2.02895	4.72034	60.8566	2.10642e-08	4.61812e-05	3	7	Up-regulated
Sus_scrofa___MTPN	2.11326	7.41818	60.5875	2.18792e-08	4.61812e-05	3	7	Up-regulated
Sus_scrofa___LGALS1	4.50822	1.90828	58.1627	2.34824e-08	4.61812e-05	3	7	Up-regulated
Sus_scrofa___ANO6	4.57234	6.19854	60.1905	2.40633e-08	4.61812e-05	3	7	Up-regulated
Sus_scrofa___RSAD2	7.97108	5.82815	60.8093	2.90485e-08	4.95525e-05	3	7	Up-regulated
Sus_scrofa___UBE2L6	4.80485	2.71248	49.2722	3.03731e-08	4.95525e-05	3	7	Up-regulated
Sus_scrofa___CCDC194	4.22755	0.978802	44.2005	3.44445e-08	5.05503e-05	3	7	Up-regulated
Sus_scrofa___IFIT1	4.80319	5.60426	52.5719	5.31251e-08	7.23209e-05	3	7	Up-regulated
Sus_scrofa___ZDHHC14	3.71758	5.78038	55.0046	5.50762e-08	7.23209e-05	3	7	Up-regulated
Sus_scrofa___GK5	2.27318	5.28863	51.5313	9.85884e-08	0.000122984	3	7	Up-regulated
Sus_scrofa___MYORG	1.5986	6.27957	49.8912	1.31578e-07	0.000144321	3	7	Up-regulated
Sus_scrofa___MX1	5.8336	5.75558	45.5723	1.33047e-07	0.000144321	3	7	Up-regulated
Sus_scrofa___TEP1	1.88157	4.81235	48.9879	1.55241e-07	0.000154925	3	7	Up-regulated
Sus_scrofa___RNF152	2.33876	5.37284	48.3802	1.73212e-07	0.00016621	3	7	Up-regulated
Sus_scrofa___MAP1A	3.18869	1.33908	40.5783	1.92496e-07	0.000177873	3	7	Up-regulated
Sus_scrofa___HERC5	4.89851	5.57937	47.3776	2.14385e-07	0.000184438	3	7	Up-regulated
Sus_scrofa___BST2	5.7544	3.34152	45.7909	2.77647e-07	0.000230901	3	7	Up-regulated
Sus_scrofa___H2BC21	2.57725	3.44559	45.4205	3.12442e-07	0.000251456	3	7	Up-regulated
Sus_scrofa___NPC2	2.35658	2.38254	45.0109	3.34313e-07	0.000254914	3	7	Up-regulated
Sus_scrofa___OAS2	4.4953	6.64316	44.8818	3.37174e-07	0.000254914	3	7	Up-regulated
Sus_scrofa___MDM2	1.75139	6.65552	44.5978	3.5217e-07	0.000255483	3	7	Up-regulated
Sus_scrofa___PEA15	1.65299	4.02917	44.3975	3.69537e-07	0.000255483	3	7	Up-regulated
Sus_scrofa___ENSSSCG00000036669	1.85332	7.3305	44.2856	3.74043e-07	0.000255483	3	7	Up-regulated
Sus_scrofa___SCNN1A	2.87214	2.50853	43.3492	4.32228e-07	0.000269591	3	7	Up-regulated
Sus_scrofa___ENSSSCG00000008898	3.177	1.4992	40.0964	4.62371e-07	0.000281358	3	7	Up-regulated
Sus_scrofa___IFIT2	4.76977	4.02146	41.8693	5.18846e-07	0.000308207	3	7	Up-regulated
Sus_scrofa___HTATIP2	1.69783	3.87168	42.0641	5.8565e-07	0.000332077	3	7	Up-regulated
Sus_scrofa___NMI	3.82435	1.24716	34.7735	7.29269e-07	0.000397333	3	7	Up-regulated
Sus_scrofa___ZMAT3	2.27691	3.97919	40.9551	7.32588e-07	0.000397333	3	7	Up-regulated
Sus_scrofa___CDC14A	1.87143	7.13703	40.2149	8.43708e-07	0.000424818	3	7	Up-regulated
Sus_scrofa___DNAJB9	2.08213	5.10359	40.1867	8.51373e-07	0.000424818	3	7	Up-regulated
Sus_scrofa___YBX2	2.74214	2.11192	39.4574	9.52781e-07	0.000457133	3	7	Up-regulated
Sus_scrofa___ENSSSCG00000034610	3.06836	4.52031	38.6403	1.17941e-06	0.000552483	3	7	Up-regulated
Sus_scrofa___IGF2BP2	2.20122	7.3673	38.5436	1.1958e-06	0.000552483	3	7	Up-regulated
Sus_scrofa___PARP14	4.10878	3.41298	35.0941	1.27703e-06	0.000573813	3	7	Up-regulated
Sus_scrofa___F2	2.81633	2.53115	38.26	1.28797e-06	0.000573813	3	7	Up-regulated
Sus_scrofa___MOB3B	2.1388	4.65369	37.9776	1.34889e-06	0.000590414	3	7	Up-regulated
Sus_scrofa___ENSSSCG00000017754	2.78476	3.79274	37.7572	1.38047e-06	0.000593817	3	7	Up-regulated
Sus_scrofa___SLC20A2	1.70404	9.16787	37.1848	1.59852e-06	0.000675959	3	7	Up-regulated
Sus_scrofa___SH3RF2	2.62605	4.63892	37.134	1.63923e-06	0.000676123	3	7	Up-regulated
Sus_scrofa___CMAS	1.62059	4.69582	37.043	1.65311e-06	0.000676123	3	7	Up-regulated
Sus_scrofa___RIMKLA	2.42368	1.92885	33.4552	1.82051e-06	0.000718398	3	7	Up-regulated
Sus_scrofa___AKAP7	1.94726	5.93118	36.5106	1.85161e-06	0.000718398	3	7	Up-regulated
Sus_scrofa___MLLT11	1.97057	3.89791	36.0584	2.06429e-06	0.000757071	3	7	Up-regulated
Sus_scrofa___NFATC2	2.21122	4.27015	36.0041	2.07905e-06	0.000757071	3	7	Up-regulated
Sus_scrofa___GAN	1.71683	6.64442	35.9468	2.09486e-06	0.000757071	3	7	Up-regulated
Sus_scrofa___HLA-DOB	4.17327	0.70827	30.2781	2.12413e-06	0.000757071	3	7	Up-regulated
Sus_scrofa___H1-3	3.43867	4.23552	35.4822	2.37625e-06	0.000835001	3	7	Up-regulated
Sus_scrofa___LIMK1	1.75993	3.79788	34.7798	2.75334e-06	0.000897484	3	7	Up-regulated
Sus_scrofa___DHDH	1.43261	3.99947	34.7147	2.77134e-06	0.000897484	3	7	Up-regulated
Sus_scrofa___CDIN1	1.06388	7.28023	34.3713	2.97806e-06	0.0009405	3	7	Up-regulated
Sus_scrofa___ENSSSCG00000051689	3.33922	1.39637	29.7714	3.04429e-06	0.0009494	3	7	Up-regulated
Sus_scrofa___LZTS1	1.92726	5.63072	34.0186	3.22846e-06	0.000994405	3	7	Up-regulated
Sus_scrofa___CMPK2	5.62355	4.20544	36.1143	3.48087e-06	0.00104632	3	7	Up-regulated
Sus_scrofa___SCARB2	1.24129	6.13083	33.3133	3.793e-06	0.00111331	3	7	Up-regulated
Sus_scrofa___ETV7	3.82809	1.10044	28.1025	3.84985e-06	0.00111679	3	7	Up-regulated
Sus_scrofa___STX3	2.02643	2.85161	31.7214	3.89437e-06	0.00111679	3	7	Up-regulated
Sus_scrofa___TRIM56	2.84528	2.60993	32.7472	4.38391e-06	0.00122049	3	7	Up-regulated
Sus_scrofa___MOV10	2.53536	3.74064	32.7714	4.40274e-06	0.00122049	3	7	Up-regulated
Sus_scrofa___TMEM231	1.8135	3.16719	32.5831	4.61089e-06	0.0012504	3	7	Up-regulated
Sus_scrofa___DENND3	2.34785	3.28266	32.3882	4.81338e-06	0.00129128	3	7	Up-regulated
Sus_scrofa___SNX21	1.84853	4.18388	31.992	5.18501e-06	0.0013517	3	7	Up-regulated
Sus_scrofa___ISG20	5.32846	0.863535	28.8185	5.22786e-06	0.0013517	3	7	Up-regulated
Sus_scrofa___RPL37A	1.89641	4.43164	31.9316	5.3095e-06	0.0013517	3	7	Up-regulated
Sus_scrofa___AFF2	2.98674	3.07797	31.8458	5.53097e-06	0.00137992	3	7	Up-regulated
Sus_scrofa___PSMA6	0.925656	6.20722	31.3457	6.01665e-06	0.00148623	3	7	Up-regulated
Sus_scrofa___CHMP4B	1.61091	6.98293	30.6635	7.08698e-06	0.00168393	3	7	Up-regulated
Sus_scrofa___ADAR	1.97684	5.60494	30.5444	7.29775e-06	0.0017016	3	7	Up-regulated
Sus_scrofa___ZNFX1	2.14929	5.52294	30.4605	7.45524e-06	0.00172223	3	7	Up-regulated
Sus_scrofa___ENSSSCG00000001398	3.21081	1.57026	26.9626	8.68706e-06	0.00193512	3	7	Up-regulated
Sus_scrofa___ASAP1	1.06192	7.92247	29.7511	8.84966e-06	0.0019539	3	7	Up-regulated
Sus_scrofa___ENSSSCG00000025593	3.82471	1.44306	26.506	8.96908e-06	0.00196289	3	7	Up-regulated
Sus_scrofa___SH3PXD2A	1.73015	7.15519	29.6109	9.16081e-06	0.00198742	3	7	Up-regulated
Sus_scrofa___TRANK1	2.25184	5.08903	29.4661	9.51136e-06	0.00204568	3	7	Up-regulated
Sus_scrofa___VPS26C	1.08641	6.25239	29.2695	9.96805e-06	0.00210757	3	7	Up-regulated
Sus_scrofa___ENSSSCG00000001229	3.54946	5.10759	28.4755	1.01403e-05	0.00210995	3	7	Up-regulated
Sus_scrofa___XPO6	1.22968	6.58593	29.197	1.01484e-05	0.00210995	3	7	Up-regulated
Sus_scrofa___CCDC180	1.96235	5.46843	29.1277	1.03338e-05	0.00213072	3	7	Up-regulated
Sus_scrofa___PRKCE	1.35718	10.4975	29.0451	1.05375e-05	0.00215491	3	7	Up-regulated
Sus_scrofa___HELB	1.63674	5.46578	28.9587	1.07811e-05	0.00218681	3	7	Up-regulated
Sus_scrofa___DTX3L	3.88626	3.13277	28.06	1.10409e-05	0.00222144	3	7	Up-regulated
Sus_scrofa___DDHD1	1.15952	6.3371	28.6068	1.17598e-05	0.0023102	3	7	Up-regulated
Sus_scrofa___MGMT	1.73533	7.39375	28.4156	1.23371e-05	0.00240467	3	7	Up-regulated
Sus_scrofa___PLEKHO1	1.90126	2.9485	27.6063	1.5044e-05	0.00280099	3	7	Up-regulated
Sus_scrofa___SLCO1A2	3.028	0.555555	23.8523	1.53699e-05	0.00283002	3	7	Up-regulated
Sus_scrofa___B2M	2.19214	6.53006	27.459	1.57369e-05	0.0028614	3	7	Up-regulated
Sus_scrofa___ISG12(A)	4.8455	5.78971	25.942	1.58272e-05	0.0028614	3	7	Up-regulated
Sus_scrofa___NFKB1	1.00061	7.43603	27.0626	1.74245e-05	0.0030284	3	7	Up-regulated
Sus_scrofa___AEBP2	1.1731	7.90622	27.0095	1.76648e-05	0.0030284	3	7	Up-regulated
Sus_scrofa___SP110	3.37248	3.1002	26.8765	1.76674e-05	0.0030284	3	7	Up-regulated
Sus_scrofa___GSR	1.64486	5.58133	26.999	1.7722e-05	0.0030284	3	7	Up-regulated
Sus_scrofa___ENSSSCG00000039582	1.34509	5.35367	26.8801	1.82779e-05	0.00308118	3	7	Up-regulated
Sus_scrofa___ENSSSCG00000015823	1.95876	1.94557	26.1706	1.879e-05	0.00314626	3	7	Up-regulated
Sus_scrofa___RNF19B	1.61302	5.22698	26.7339	1.89999e-05	0.00316019	3	7	Up-regulated
Sus_scrofa___LSM6	1.34499	4.74569	26.5902	1.97261e-05	0.00325088	3	7	Up-regulated
Sus_scrofa___ELF4	2.3239	1.82972	25.3314	1.98058e-05	0.00325088	3	7	Up-regulated
Sus_scrofa___DDX60	4.3845	5.76245	25.8472	2.13576e-05	0.0033602	3	7	Up-regulated
Sus_scrofa___CEMIP2	1.866	4.03211	26.2617	2.15884e-05	0.0033602	3	7	Up-regulated
Sus_scrofa___IER5	1.90904	3.34293	26.2859	2.16081e-05	0.0033602	3	7	Up-regulated
Sus_scrofa___IFIT5	2.74049	4.38701	26.2513	2.17621e-05	0.0033602	3	7	Up-regulated
Sus_scrofa___UVRAG	1.16864	8.84982	26.1946	2.18493e-05	0.0033602	3	7	Up-regulated
Sus_scrofa___DDC	2.64776	1.66713	24.7915	2.23562e-05	0.00338821	3	7	Up-regulated
Sus_scrofa___ENSSSCG00000004404	2.73346	1.19728	23.5502	2.24079e-05	0.00338821	3	7	Up-regulated
Sus_scrofa___LAT2	1.95779	2.81338	26.0629	2.32783e-05	0.00346706	3	7	Up-regulated
Sus_scrofa___NCAM1	1.73186	10.2984	25.9378	2.33801e-05	0.00346706	3	7	Up-regulated
Sus_scrofa___ENSSSCG00000031661	2.29841	3.67164	25.9614	2.35534e-05	0.00346706	3	7	Up-regulated
Sus_scrofa___DUSP4	2.95899	2.8577	24.2543	2.40461e-05	0.00350833	3	7	Up-regulated
Sus_scrofa___RABIF	1.85894	2.97616	25.8462	2.44442e-05	0.0035252	3	7	Up-regulated
Sus_scrofa___LIG4	1.53759	2.32279	25.7874	2.50082e-05	0.00355131	3	7	Up-regulated
Sus_scrofa___ENSSSCG00000014672	3.58345	1.24065	22.3715	2.50523e-05	0.00355131	3	7	Up-regulated
Sus_scrofa___PLSCR1	1.98365	4.42527	25.6728	2.52152e-05	0.0035542	3	7	Up-regulated
Sus_scrofa___GDAP2	1.12014	6.11634	25.5387	2.59981e-05	0.00360347	3	7	Up-regulated
Sus_scrofa___SOGA1	1.4275	4.74753	25.3623	2.728e-05	0.00372066	3	7	Up-regulated
Sus_scrofa___MOSPD2	1.22638	4.93332	25.3591	2.72909e-05	0.00372066	3	7	Up-regulated
Sus_scrofa___CHD3	1.44363	4.22205	25.286	2.79025e-05	0.00376292	3	7	Up-regulated
Sus_scrofa___FAM171B	2.11236	3.87305	25.2265	2.87612e-05	0.00381352	3	7	Up-regulated
Sus_scrofa___MFSD2B	1.28209	3.92998	25.0705	2.95899e-05	0.00386883	3	7	Up-regulated
Sus_scrofa___ENC1	2.79221	2.22707	24.3924	2.97334e-05	0.00386883	3	7	Up-regulated
Sus_scrofa___ENSSSCG00000037142	3.98174	0.548505	21.8999	2.97733e-05	0.00386883	3	7	Up-regulated
Sus_scrofa___ADCY9	1.06174	7.14855	24.9909	3.01042e-05	0.00389155	3	7	Up-regulated
Sus_scrofa___ENSSSCG00000021977	1.28596	7.306	24.8984	3.08643e-05	0.00394888	3	7	Up-regulated
Sus_scrofa___H2AC6	3.24834	3.63037	24.9263	3.13246e-05	0.00396838	3	7	Up-regulated
Sus_scrofa___ENSSSCG00000045769	3.80025	3.9375	24.9109	3.14507e-05	0.00396838	3	7	Up-regulated
Sus_scrofa___VPS37C	1.10935	4.61746	24.8285	3.14938e-05	0.00396838	3	7	Up-regulated
Sus_scrofa___ZDHHC20	1.01987	6.73574	24.7524	3.21083e-05	0.00402547	3	7	Up-regulated
Sus_scrofa___LMOD2	1.18244	8.2999	24.6941	3.26174e-05	0.00404668	3	7	Up-regulated
Sus_scrofa___FBXO39	1.78064	7.31067	24.678	3.2764e-05	0.00404668	3	7	Up-regulated
Sus_scrofa___WDR54	2.78768	0.876708	22.5717	3.30907e-05	0.0040669	3	7	Up-regulated
Sus_scrofa___ENSSSCG00000012006	2.0889	4.60155	24.51	3.46543e-05	0.00421752	3	7	Up-regulated
Sus_scrofa___ARRDC2	2.40584	3.54949	24.4881	3.50049e-05	0.00423951	3	7	Up-regulated
Sus_scrofa___ENSSSCG00000003079	2.27433	4.04087	24.4215	3.56855e-05	0.00430106	3	7	Up-regulated
Sus_scrofa___ENSSSCG00000007525	1.54029	2.86561	24.3967	3.60388e-05	0.00432275	3	7	Up-regulated
Sus_scrofa___C20orf96	2.22093	2.06009	23.8797	4.00767e-05	0.00467231	3	7	Up-regulated
Sus_scrofa___BMP4	1.53161	3.85867	23.8351	4.14702e-05	0.00478185	3	7	Up-regulated
Sus_scrofa___PLAAT3	1.52258	5.38612	23.8167	4.14888e-05	0.00478185	3	7	Up-regulated
Sus_scrofa___APAF1	1.45005	5.293	23.8082	4.15913e-05	0.00478185	3	7	Up-regulated
Sus_scrofa___ENSSSCG00000005768	1.22039	5.24498	23.7458	4.23106e-05	0.00484224	3	7	Up-regulated
Sus_scrofa___INHBA	2.86314	1.75819	23.237	4.37714e-05	0.00498654	3	7	Up-regulated
Sus_scrofa___STAC2	3.02102	7.14636	23.2081	4.40135e-05	0.00499133	3	7	Up-regulated
Sus_scrofa___RIN3	1.50152	5.68842	23.5767	4.43317e-05	0.00500467	3	7	Up-regulated
Sus_scrofa___SEPTIN11	1.59603	5.81913	23.5163	4.50824e-05	0.00502125	3	7	Up-regulated
Sus_scrofa___ADM	2.75835	3.04579	23.1709	4.73369e-05	0.00524892	3	7	Up-regulated
Sus_scrofa___ENSSSCG00000025631	1.49272	3.26178	23.2634	4.8965e-05	0.00535802	3	7	Up-regulated
Sus_scrofa___MTX3	1.29146	4.27234	23.1849	4.95238e-05	0.00536241	3	7	Up-regulated
Sus_scrofa___H1-0	1.89904	3.33037	23.1771	5.01382e-05	0.00537568	3	7	Up-regulated
Sus_scrofa___SH3PXD2B	1.82405	7.31759	23.1196	5.03439e-05	0.00537568	3	7	Up-regulated
Sus_scrofa___LAX1	2.55559	1.22074	21.3581	5.0489e-05	0.00537568	3	7	Up-regulated
Sus_scrofa___ENSSSCG00000028691	2.13352	2.54352	23.1422	5.06842e-05	0.00537568	3	7	Up-regulated
Sus_scrofa___ABHD4	1.52013	6.07143	23.0146	5.1856e-05	0.00539065	3	7	Up-regulated
Sus_scrofa___PACSIN3	1.32944	5.76195	22.9955	5.21369e-05	0.00539736	3	7	Up-regulated
Papio_anubis_ELOA	2.70057	1.34746	20.5399	5.33757e-05	0.00546507	3	7	Up-regulated
Sus_scrofa___H3-5	2.36509	6.81271	22.811	5.49094e-05	0.00547974	3	7	Up-regulated
Sus_scrofa___NCK2	1.09547	6.07271	22.7335	5.61284e-05	0.00553497	3	7	Up-regulated
Sus_scrofa___ANKRD35	2.29143	0.96451	21.5224	5.69614e-05	0.00557306	3	7	Up-regulated
Sus_scrofa___TRIOBP	1.65912	4.84003	22.6564	5.7443e-05	0.00558203	3	7	Up-regulated
Sus_scrofa___TERF2IP	0.919388	5.51435	22.5514	5.91059e-05	0.0056767	3	7	Up-regulated
Sus_scrofa___PIR	1.94784	3.30972	22.5966	5.91583e-05	0.0056767	3	7	Up-regulated
Sus_scrofa___EEA1	1.07666	7.66589	22.5311	5.94285e-05	0.00568078	3	7	Up-regulated
Sus_scrofa___SERPINB2	2.40022	5.91959	22.4197	6.1374e-05	0.00580007	3	7	Up-regulated
Sus_scrofa___PGGT1B	1.17659	7.11376	22.356	6.24648e-05	0.00587631	3	7	Up-regulated
Sus_scrofa___EGLN3	1.48771	7.46719	22.2917	6.36214e-05	0.00594491	3	7	Up-regulated
Sus_scrofa___CHIC2	1.06577	6.81692	22.2048	6.52208e-05	0.00602665	3	7	Up-regulated
Sus_scrofa___TM2D3	0.993221	5.62423	22.1629	6.60204e-05	0.00607802	3	7	Up-regulated
Sus_scrofa___SLC37A2	1.95267	2.19685	22.1793	6.65135e-05	0.00607825	3	7	Up-regulated
Sus_scrofa___CLMN	1.85254	3.20606	22.1682	6.6806e-05	0.00607825	3	7	Up-regulated
Sus_scrofa___ZC3HAV1	2.69135	5.1692	22.0972	6.73636e-05	0.00607825	3	7	Up-regulated
Sus_scrofa___MRPS30	1.09971	5.93762	22.0922	6.73656e-05	0.00607825	3	7	Up-regulated
Sus_scrofa___UBA7	6.18191	0.177579	24.5058	6.74847e-05	0.00607825	3	7	Up-regulated
Sus_scrofa___CSNK1G1	0.954768	7.28621	21.9579	6.99992e-05	0.00623333	3	7	Up-regulated
Sus_scrofa___ZNF395	1.05084	7.6616	21.9273	7.06181e-05	0.00623333	3	7	Up-regulated
Sus_scrofa___ENSSSCG00000012566	1.17615	5.44897	21.9168	7.08599e-05	0.00623333	3	7	Up-regulated
Sus_scrofa___PARP9	3.32696	3.52302	21.8263	7.09474e-05	0.00623333	3	7	Up-regulated
Sus_scrofa___CSTB	1.80964	2.60523	21.979	7.09554e-05	0.00623333	3	7	Up-regulated
Sus_scrofa___ZDHHC18	0.952306	4.37811	21.8474	7.23642e-05	0.00633479	3	7	Up-regulated
Sus_scrofa___MRPS9	0.956796	6.41367	21.8159	7.2926e-05	0.00636165	3	7	Up-regulated
Sus_scrofa___GHSR	2.69428	2.5865	21.4543	7.41458e-05	0.00642314	3	7	Up-regulated
Sus_scrofa___GM2A	2.2822	2.02422	21.7266	7.47832e-05	0.00643368	3	7	Up-regulated
Sus_scrofa___ANKRD2	2.97282	4.2929	21.7029	7.59576e-05	0.00648995	3	7	Up-regulated
Sus_scrofa___C1orf115	2.3088	1.57017	20.3703	7.74326e-05	0.0065934	3	7	Up-regulated
Sus_scrofa___ENSSSCG00000032436	4.8661	2.13026	20.1158	8.29299e-05	0.00694301	3	7	Up-regulated
Sus_scrofa___ENSSSCG00000006777	2.65298	1.26923	19.8977	8.34564e-05	0.00696373	3	7	Up-regulated
Sus_scrofa___YPEL5	1.04172	5.71477	21.2275	8.65137e-05	0.00719477	3	7	Up-regulated
pCMV_____gp45	9.18556	1.3817	33.0156	8.81909e-05	0.00730988	3	7	Up-regulated
Sus_scrofa___YBX3	1.42504	8.09908	21.1386	8.87712e-05	0.00733362	3	7	Up-regulated
Sus_scrofa___HLCS	1.00033	5.95488	21.1202	8.92662e-05	0.00735017	3	7	Up-regulated
Sus_scrofa___SRRM3	1.74401	2.63571	21.1105	9.14113e-05	0.00750204	3	7	Up-regulated
Sus_scrofa___OSGIN1	1.354	4.63106	20.9457	9.40477e-05	0.0076054	3	7	Up-regulated
Sus_scrofa___ENSSSCG00000022032	1.16436	7.36664	20.9197	9.46634e-05	0.0076054	3	7	Up-regulated
Sus_scrofa___EIF4E3	0.920287	6.00236	20.8515	9.65952e-05	0.00767501	3	7	Up-regulated
Sus_scrofa___JCHAIN	1.07258	5.01399	20.791	9.83721e-05	0.00775283	3	7	Up-regulated
Sus_scrofa___UBE2Z	1.13565	5.53041	20.6751	0.00010177	0.00795887	3	7	Up-regulated
Sus_scrofa___ENSSSCG00000049384	2.51358	0.634494	18.8858	0.000103854	0.00804672	3	7	Up-regulated
Sus_scrofa___PURG	0.928071	5.91289	20.5522	0.000105533	0.00812636	3	7	Up-regulated
Sus_scrofa___CAMTA1	1.01044	7.97981	20.5301	0.000106204	0.00815287	3	7	Up-regulated
Sus_scrofa___GPATCH2	0.860901	6.89946	20.5057	0.000106981	0.00816228	3	7	Up-regulated
Sus_scrofa___PRR16	1.09064	9.34717	20.4828	0.000107706	0.00819258	3	7	Up-regulated
Sus_scrofa___MFRP	2.34236	1.74197	19.83	0.000108591	0.00823476	3	7	Up-regulated
pCMV_____gp46	7.24482	0.136542	26.7519	0.000109142	0.00825147	3	7	Up-regulated
Sus_scrofa___ANKRD37	2.0645	3.94431	20.2384	0.000116955	0.00863288	3	7	Up-regulated
Sus_scrofa___SLC10A7	0.970192	6.75895	20.1778	0.000117965	0.00865644	3	7	Up-regulated
Sus_scrofa___ENSSSCG00000017146	2.88514	6.70401	20.169	0.000118307	0.00865644	3	7	Up-regulated
Sus_scrofa___GPR137B	1.66794	3.06521	20.2241	0.000118315	0.00865644	3	7	Up-regulated
Sus_scrofa___ENSSSCG00000004387	1.00539	9.4286	20.1357	0.000119455	0.00869132	3	7	Up-regulated
Papio_anubis_NIPBL	2.39943	1.76982	19.2603	0.000119512	0.00869132	3	7	Up-regulated
Sus_scrofa___TLL2	2.14701	4.22733	20.1622	0.000119837	0.00869132	3	7	Up-regulated
Papio_anubis_ERO1A	4.25653	0.0668224	18.8232	0.00012065	0.00872492	3	7	Up-regulated
Sus_scrofa___TRIM21	2.56223	3.76639	20.1143	0.000121689	0.00877466	3	7	Up-regulated
Sus_scrofa___RBM25	0.811424	7.8136	20.0616	0.000122135	0.00878142	3	7	Up-regulated
Sus_scrofa___ENSSSCG00000015027	1.514	2.79294	20.0121	0.000125762	0.00899037	3	7	Up-regulated
Sus_scrofa___CYP2E1	1.24721	3.69794	19.8905	0.000129131	0.00917861	3	7	Up-regulated
Sus_scrofa___MAGI1	1.31931	8.37661	19.8206	0.000131318	0.00930756	3	7	Up-regulated
Sus_scrofa___PI4K2B	0.947804	5.51371	19.8073	0.00013188	0.0093093	3	7	Up-regulated
Sus_scrofa___BMPR2	0.875907	8.36193	19.8012	0.000132089	0.0093093	3	7	Up-regulated
Sus_scrofa___ENSSSCG00000014280	1.18028	7.71923	19.6803	0.000137005	0.00961379	3	7	Up-regulated
Sus_scrofa___ENSSSCG00000035669	2.64044	2.34587	19.5414	0.00013718	0.00961379	3	7	Up-regulated
Sus_scrofa___SLC37A3	1.14015	4.85837	19.6626	0.000137827	0.00963205	3	7	Up-regulated
pCMV_____gp73	7.67066	0.352264	29.8309	0.000140146	0.00972301	3	7	Up-regulated
Sus_scrofa___ITGA10	1.19864	4.05893	19.5774	0.000141637	0.00978862	3	7	Up-regulated
Sus_scrofa___ENSSSCG00000011553	1.07065	6.39693	19.5205	0.00014382	0.00984759	3	7	Up-regulated
Sus_scrofa___H2AC20	2.24912	1.61289	19.3558	0.000144905	0.00984759	3	7	Up-regulated
Sus_scrofa___GPNMB	1.5361	5.30376	19.481	0.000145622	0.00984759	3	7	Up-regulated
Sus_scrofa___ENSSSCG00000033010	2.11253	4.24783	19.4961	0.000145648	0.00984759	3	7	Up-regulated
Sus_scrofa___C9orf72	1.365	4.50915	19.3673	0.000150877	0.0101462	3	7	Up-regulated
Sus_scrofa___TSEN2	1.76714	5.8495	19.3253	0.000152644	0.0101827	3	7	Up-regulated
Sus_scrofa___PDE6D	1.1381	5.45938	19.272	0.00015517	0.0103236	3	7	Up-regulated
Sus_scrofa___ARFIP1	0.802215	7.49509	19.1536	0.000160836	0.010532	3	7	Up-regulated
Sus_scrofa___ENSSSCG00000032311	1.19571	3.90171	19.0598	0.000165983	0.0106832	3	7	Up-regulated
Sus_scrofa___BRMS1	1.23843	3.2803	19.0685	0.000166455	0.0106832	3	7	Up-regulated
Sus_scrofa___COPZ2	1.52622	2.77694	19.088	0.00016657	0.0106832	3	7	Up-regulated
Sus_scrofa___STAT1	2.52201	7.54227	19.0276	0.000167182	0.0106949	3	7	Up-regulated
Sus_scrofa___FAM155B	2.11159	1.77441	18.9213	0.000168731	0.0107664	3	7	Up-regulated
Sus_scrofa___UBE2R2	0.856798	8.94927	18.9776	0.000169764	0.0108047	3	7	Up-regulated
Sus_scrofa___ACBD3	0.999348	5.82182	18.7273	0.00018343	0.0115274	3	7	Up-regulated
Sus_scrofa___ROCK2	1.24317	9.50291	18.6822	0.000185974	0.0116579	3	7	Up-regulated
Sus_scrofa___XKR6	0.885809	8.20861	18.5913	0.000191293	0.0118721	3	7	Up-regulated
Sus_scrofa___SPIDR	1.48639	6.47053	18.5752	0.000192308	0.0119028	3	7	Up-regulated
Sus_scrofa___MAPRE3	0.93111	5.66106	18.5677	0.000192742	0.0119028	3	7	Up-regulated
Sus_scrofa___CDKN1A	1.58946	3.77565	18.5696	0.000193737	0.0119077	3	7	Up-regulated
Sus_scrofa___ALAD	1.14326	3.82975	18.5537	0.000194286	0.0119077	3	7	Up-regulated
Sus_scrofa___HSPBAP1	1.18619	4.96577	18.4604	0.000199348	0.0121602	3	7	Up-regulated
Sus_scrofa___ENSSSCG00000031163	3.61177	0.510849	16.769	0.000205392	0.0124076	3	7	Up-regulated
Sus_scrofa___PROCA1	2.05367	3.42687	18.2884	0.000212077	0.0126474	3	7	Up-regulated
Sus_scrofa___RSRC1	0.897567	7.20572	18.2579	0.000212252	0.0126474	3	7	Up-regulated
Sus_scrofa___MED15	1.22554	5.62537	18.2504	0.000212799	0.0126474	3	7	Up-regulated
Sus_scrofa___PLEKHA4	2.3482	4.20093	18.2817	0.000213078	0.0126474	3	7	Up-regulated
Sus_scrofa___PML	2.52223	6.03394	18.0686	0.000225351	0.0132289	3	7	Up-regulated
Sus_scrofa___SLC31A2	1.70631	1.58286	17.8658	0.00023226	0.0134674	3	7	Up-regulated
Sus_scrofa___DYNC1H1	0.878006	6.29263	17.9569	0.000233322	0.0134674	3	7	Up-regulated
Sus_scrofa___STAMBP	0.889695	5.53217	17.9354	0.000234941	0.0135059	3	7	Up-regulated
Sus_scrofa___EIF4EBP1	1.6036	4.5782	17.856	0.000241571	0.0137115	3	7	Up-regulated
Sus_scrofa___CCDC50	1.03813	5.56526	17.8472	0.000241574	0.0137115	3	7	Up-regulated
Sus_scrofa___ENSSSCG00000002875	0.871139	4.87643	17.8451	0.000241815	0.0137115	3	7	Up-regulated
Sus_scrofa___MEGF9	1.07077	4.10147	17.7695	0.000248066	0.0139233	3	7	Up-regulated
Papio_anubis_NF1	5.01664	-0.53519	17.6728	0.000252079	0.0140655	3	7	Up-regulated
Sus_scrofa___MYOT	1.01578	8.54102	17.7104	0.000252212	0.0140655	3	7	Up-regulated
Sus_scrofa___HECTD4	0.858468	9.05234	17.706	0.000252568	0.0140655	3	7	Up-regulated
Sus_scrofa___SSR3	1.26228	6.4456	17.6944	0.00025353	0.0140876	3	7	Up-regulated
Sus_scrofa___ENSSSCG00000006324	1.45241	3.90216	17.6587	0.000257392	0.0142704	3	7	Up-regulated
Sus_scrofa___KAZN	0.919271	4.99706	17.6318	0.000258727	0.0142809	3	7	Up-regulated
Sus_scrofa___MORC3	1.0638	5.79255	17.6147	0.000260041	0.0142902	3	7	Up-regulated
Sus_scrofa___MARCHF8	1.10582	7.5594	17.587	0.0002623	0.0143827	3	7	Up-regulated
pCMV_____gp25	7.54761	0.310873	25.7735	0.000264286	0.0144598	3	7	Up-regulated
Papio_anubis_ENSPANG00000008041	2.47623	0.74385	16.0696	0.000266331	0.0145398	3	7	Up-regulated
Sus_scrofa___NDN	2.53882	-0.105362	15.5856	0.000270409	0.0147302	3	7	Up-regulated
Papio_anubis_BCLAF1	2.46587	0.418586	16.1928	0.000271339	0.0147371	3	7	Up-regulated
Sus_scrofa___LDHC	1.77775	3.75135	17.4953	0.000271717	0.0147371	3	7	Up-regulated
Sus_scrofa___UCHL1	4.62391	-0.0314622	17.0058	0.000275301	0.0148347	3	7	Up-regulated
Sus_scrofa___C3orf38	1.19785	5.13981	17.4228	0.000276507	0.0148495	3	7	Up-regulated
Sus_scrofa___VTI1A	0.805852	7.96815	17.3981	0.000278594	0.0149155	3	7	Up-regulated
Sus_scrofa___TRIM26	1.96058	3.81589	17.3821	0.000281586	0.0150113	3	7	Up-regulated
Sus_scrofa___SNX24	1.01183	6.71387	17.3174	0.0002859	0.0151764	3	7	Up-regulated
Sus_scrofa___ACCSL	0.871582	5.97844	17.2548	0.000291716	0.0154523	3	7	Up-regulated
Sus_scrofa___IFI44	3.60371	6.25502	16.945	0.000293808	0.0154958	3	7	Up-regulated
pCMV_____gp48	6.55638	-0.198034	24.952	0.000294922	0.0154958	3	7	Up-regulated
Sus_scrofa___ENSSSCG00000002950	0.93002	6.78961	17.2194	0.000295021	0.0154958	3	7	Up-regulated
Sus_scrofa___APOBEC3B	2.09198	2.19483	17.1692	0.000295966	0.0155013	3	7	Up-regulated
Sus_scrofa___ENSSSCG00000003990	0.986092	3.59633	17.2112	0.000296952	0.0155013	3	7	Up-regulated
Sus_scrofa___NTSR2	2.19945	2.25083	17.1622	0.000298069	0.0155013	3	7	Up-regulated
Sus_scrofa___UCK2	1.51473	8.59166	17.1856	0.000298234	0.0155013	3	7	Up-regulated
Sus_scrofa___CRYAB	1.57026	7.97711	17.0986	0.000306694	0.0159079	3	7	Up-regulated
Sus_scrofa___EIF4EBP2	1.04814	5.7036	17.0835	0.000308245	0.0159552	3	7	Up-regulated
Sus_scrofa___IRF7	2.80782	2.07476	16.4648	0.000312849	0.0161223	3	7	Up-regulated
Sus_scrofa___HPCAL1	1.21128	4.83922	17.0191	0.000314921	0.0161666	3	7	Up-regulated
Sus_scrofa___FYTTD1	0.875915	7.3207	16.9723	0.000319459	0.016339	3	7	Up-regulated
Sus_scrofa___NTN1	1.72855	2.63382	16.9971	0.00032243	0.016417	3	7	Up-regulated
Sus_scrofa___FAM180A	2.09863	3.56481	16.9655	0.000323752	0.0164507	3	7	Up-regulated
Sus_scrofa___STIM2	1.04061	5.95101	16.9104	0.000325962	0.0165293	3	7	Up-regulated
Sus_scrofa___NIBAN2	1.87385	4.00963	16.8991	0.000328426	0.0166205	3	7	Up-regulated
Sus_scrofa___ITGA5	1.38064	7.81668	16.8326	0.000334232	0.0167843	3	7	Up-regulated
Sus_scrofa___C4orf46	2.06378	2.59368	16.8414	0.000334318	0.0167843	3	7	Up-regulated
Sus_scrofa___FADS1	1.5801	3.03555	16.8643	0.000334354	0.0167843	3	7	Up-regulated
Sus_scrofa___EPSTI1	3.50378	6.13405	16.7785	0.000341589	0.0169916	3	7	Up-regulated
Sus_scrofa___EIF2AK3	1.0244	7.26936	16.7633	0.000341849	0.0169916	3	7	Up-regulated
Papio_anubis_RPS12	3.92159	0.143062	16.717	0.000342526	0.0169916	3	7	Up-regulated
pCMV_____gp49	7.38535	0.243186	24.2193	0.000343198	0.0169916	3	7	Up-regulated
Sus_scrofa___SLC26A2	1.53231	2.7121	16.7861	0.000344086	0.0169916	3	7	Up-regulated
Sus_scrofa___ENSSSCG00000015795	2.37122	3.24112	16.7681	0.00034544	0.0169916	3	7	Up-regulated
Sus_scrofa___PSMD14	0.88389	6.48084	16.648	0.00035493	0.0172849	3	7	Up-regulated
Sus_scrofa___POLI	0.899871	4.6146	16.6427	0.000355778	0.0172849	3	7	Up-regulated
Sus_scrofa___ARL2BP	1.23878	3.11668	16.6458	0.000358125	0.0173156	3	7	Up-regulated
Sus_scrofa___PARVA	0.892846	7.30856	16.6001	0.000360498	0.0173966	3	7	Up-regulated
Sus_scrofa___AGPAT4	1.29331	3.94332	16.5228	0.000370502	0.0177421	3	7	Up-regulated
Sus_scrofa___RNF144B	1.61465	6.55555	16.4978	0.000372781	0.0178171	3	7	Up-regulated
Sus_scrofa___CLCN5	1.09668	5.45344	16.451	0.000378929	0.0180763	3	7	Up-regulated
Sus_scrofa___COMMD6	1.32894	10.2079	16.4233	0.000381946	0.0181253	3	7	Up-regulated
Sus_scrofa___MSN	1.58417	4.83943	16.4248	0.00038222	0.0181253	3	7	Up-regulated
Sus_scrofa___ADAMTS2	2.26167	2.36453	16.4445	0.000382861	0.0181253	3	7	Up-regulated
Sus_scrofa___ENSSSCG00000014094	0.670733	6.40847	16.3963	0.000385363	0.0181565	3	7	Up-regulated
Sus_scrofa___CDC42EP3	1.45265	5.40175	16.3886	0.000386433	0.0181565	3	7	Up-regulated
Sus_scrofa___YIPF1	0.930552	5.3948	16.3479	0.0003916	0.0182149	3	7	Up-regulated
Sus_scrofa___ENSSSCG00000047841	2.90655	0.0552363	14.8	0.000392055	0.0182149	3	7	Up-regulated
Papio_anubis_RALGAPA1	5.30393	-0.313148	17.4227	0.000395328	0.0183328	3	7	Up-regulated
Sus_scrofa___SAP30L	1.05558	4.12024	16.2935	0.00039936	0.0184777	3	7	Up-regulated
Sus_scrofa___C9orf40	1.55182	3.01252	16.2981	0.000401566	0.0184777	3	7	Up-regulated
pCMV_____gp32	7.03931	0.0328602	23.2822	0.000402157	0.0184777	3	7	Up-regulated
Sus_scrofa___FAM43B	2.36252	0.48252	14.9695	0.000405547	0.0185311	3	7	Up-regulated
Sus_scrofa___ITIH4	2.39236	0.725486	15.1341	0.000410158	0.0186734	3	7	Up-regulated
pCMV_____gp61	7.189	0.131171	23.151	0.000412855	0.0186981	3	7	Up-regulated
Sus_scrofa___PSMD7	0.886444	4.85128	16.1631	0.000416284	0.0187471	3	7	Up-regulated
Sus_scrofa___NSD2	1.21919	5.97831	16.139	0.000419445	0.0188215	3	7	Up-regulated
pCMV_____gp50	7.03094	0.00866257	22.9735	0.000424799	0.0189594	3	7	Up-regulated
Sus_scrofa___PARP12	3.14311	5.58477	16.0766	0.000429211	0.0191221	3	7	Up-regulated
Sus_scrofa___ZNF800	0.88426	6.03521	15.9439	0.000447409	0.0198201	3	7	Up-regulated
Sus_scrofa___CPQ	1.47364	3.32036	15.9329	0.000451788	0.0198861	3	7	Up-regulated
Sus_scrofa___ANKRD13A	0.955268	4.76877	15.9149	0.000451939	0.0198861	3	7	Up-regulated
Sus_scrofa___HS3ST1	2.58461	1.09966	14.9448	0.000458316	0.0200785	3	7	Up-regulated
Sus_scrofa___ENSSSCG00000049262	3.8627	-0.161259	15.9395	0.000460335	0.0200785	3	7	Up-regulated
Sus_scrofa___XKRX	1.53972	2.78441	15.844	0.000467889	0.0203393	3	7	Up-regulated
Sus_scrofa___CEBPG	1.10611	4.51786	15.7891	0.000471713	0.0204674	3	7	Up-regulated
Sus_scrofa___MAP2K1	0.977997	6.8347	15.778	0.000472763	0.0204675	3	7	Up-regulated
Sus_scrofa___PEX7	0.864116	5.70483	15.7633	0.000475129	0.0204932	3	7	Up-regulated
Sus_scrofa___SNAP23	0.770823	6.44566	15.7601	0.000475593	0.0204932	3	7	Up-regulated
Sus_scrofa___SPSB1	1.77951	4.54145	15.7286	0.000481234	0.0207005	3	7	Up-regulated
Sus_scrofa___PRKCA	1.04693	7.12057	15.7075	0.000484003	0.0207378	3	7	Up-regulated
Sus_scrofa___ENSSSCG00000013889	2.23397	3.01493	15.6658	0.00048406	0.0207378	3	7	Up-regulated
Sus_scrofa___LRP2	2.12718	3.92917	15.7084	0.000485656	0.0207476	3	7	Up-regulated
Sus_scrofa___SLC33A1	0.922068	6.25566	15.5337	0.000513017	0.0217675	3	7	Up-regulated
Sus_scrofa___APLP2	0.868497	6.6524	15.4569	0.00052639	0.0222969	3	7	Up-regulated
Sus_scrofa___ENSSSCG00000003080	2.36871	0.741152	14.43	0.000528987	0.0223127	3	7	Up-regulated
Sus_scrofa___ISG15	4.10243	5.85411	15.7016	0.000529387	0.0223127	3	7	Up-regulated
Sus_scrofa___DENND5B	0.82949	10.0002	15.4396	0.000529444	0.0223127	3	7	Up-regulated
Sus_scrofa___TGFBRAP1	0.845583	5.08683	15.4198	0.000533137	0.022355	3	7	Up-regulated
Sus_scrofa___CST3	2.6383	0.682795	14.9513	0.000539288	0.0225372	3	7	Up-regulated
Sus_scrofa___LIN54	1.0011	5.904	15.3693	0.000542177	0.0225446	3	7	Up-regulated
Sus_scrofa___STMN1	2.70557	0.367378	14.0639	0.000543979	0.0225789	3	7	Up-regulated
Sus_scrofa___KCTD13	1.17894	3.46503	15.3624	0.000545669	0.0225789	3	7	Up-regulated
Sus_scrofa___ABHD2	1.10392	9.31258	15.3402	0.000547449	0.0226131	3	7	Up-regulated
Sus_scrofa___ZNF536	1.72992	3.96278	15.3382	0.000549318	0.0226528	3	7	Up-regulated
Sus_scrofa___ENSSSCG00000007735	0.889278	6.7315	15.308	0.00055347	0.0227863	3	7	Up-regulated
Sus_scrofa___ENSSSCG00000035836	2.57506	1.15582	14.733	0.000558145	0.0229032	3	7	Up-regulated
Sus_scrofa___AHR	1.10245	5.34956	15.2642	0.000561847	0.0230126	3	7	Up-regulated
Sus_scrofa___NEMP2	1.03383	4.46616	15.2517	0.000564499	0.0230126	3	7	Up-regulated
Sus_scrofa___HERC6	3.40216	6.36576	15.226	0.000571063	0.0231398	3	7	Up-regulated
Sus_scrofa___ENSSSCG00000023324	0.691445	7.30245	15.1995	0.000574124	0.0231398	3	7	Up-regulated
Sus_scrofa___XKR9	2.12756	2.54817	15.228	0.000575165	0.0231398	3	7	Up-regulated
Sus_scrofa___MAP1LC3B	0.842835	5.60371	15.1894	0.000576175	0.0231398	3	7	Up-regulated
Sus_scrofa___MBNL1	0.794537	9.52111	15.1868	0.000576581	0.0231398	3	7	Up-regulated
pCMV_____gp09	6.74546	-0.104858	21.2182	0.000581429	0.0231869	3	7	Up-regulated
Papio_anubis_MYL2	3.634	-0.0965691	14.0567	0.000583476	0.0231869	3	7	Up-regulated
Sus_scrofa___ENSSSCG00000012235	0.998619	5.18005	15.1492	0.000584153	0.0231869	3	7	Up-regulated
Papio_anubis_XPO1	3.22262	0.0339921	14.6959	0.000584574	0.0231869	3	7	Up-regulated
Sus_scrofa___ENSSSCG00000000097	0.968545	4.13827	15.1414	0.000586256	0.0232084	3	7	Up-regulated
Sus_scrofa___ENSSSCG00000012071	2.48396	0.715584	14.1243	0.00059354	0.0233937	3	7	Up-regulated
Sus_scrofa___ATXN3L	0.879172	5.51743	15.074	0.000599152	0.0234679	3	7	Up-regulated
pCMV_____gp33	6.6918	-0.131634	21.0429	0.000599751	0.0234679	3	7	Up-regulated
pCMV_____gp56	6.6918	-0.131634	21.0429	0.000599751	0.0234679	3	7	Up-regulated
Sus_scrofa___FBXO38	0.832572	5.75983	15.0656	0.000600845	0.0234679	3	7	Up-regulated
Sus_scrofa___PSMF1	0.884451	7.03763	15.0642	0.000601066	0.0234679	3	7	Up-regulated
Papio_anubis_EIF4G3	3.61132	-0.284123	14.9728	0.000602807	0.0234991	3	7	Up-regulated
Sus_scrofa___HPS5	0.916295	4.02561	15.0522	0.000604476	0.0235274	3	7	Up-regulated
Sus_scrofa___SCAMP4	1.01861	3.19901	15.0564	0.000606103	0.023554	3	7	Up-regulated
Sus_scrofa___KCNMA1	1.14254	8.01816	15.0347	0.000607101	0.0235561	3	7	Up-regulated
Sus_scrofa___ENO1	1.22124	8.29075	15.0285	0.000608392	0.0235695	3	7	Up-regulated
Sus_scrofa___ND1	2.02223	2.99567	15.0457	0.000612076	0.023666	3	7	Up-regulated
Sus_scrofa___ENSSSCG00000011729	1.19796	7.20273	15.0074	0.000612781	0.023666	3	7	Up-regulated
Sus_scrofa___LRP3	1.50858	1.66507	14.9676	0.000617353	0.023802	3	7	Up-regulated
Sus_scrofa___TNNT1	1.46359	5.9849	14.9771	0.000619217	0.0238041	3	7	Up-regulated
Sus_scrofa___KLF6	1.66048	6.16785	14.9683	0.000621047	0.0238377	3	7	Up-regulated
Sus_scrofa___HP1BP3	0.666231	7.27167	14.9526	0.000624314	0.0238896	3	7	Up-regulated
Sus_scrofa___SRXN1	2.06414	3.19523	14.9052	0.000626475	0.0239356	3	7	Up-regulated
Sus_scrofa___ENSSSCG00000024660	2.10834	1.59378	14.2212	0.000631688	0.0240244	3	7	Up-regulated
Sus_scrofa___ZBP1	3.52314	0.194593	14.2087	0.000638315	0.0242026	3	7	Up-regulated
Sus_scrofa___ENSSSCG00000005453	1.67676	3.6973	14.8259	0.000655349	0.0246034	3	7	Up-regulated
Sus_scrofa___PHC3	0.679459	8.10353	14.7922	0.000659451	0.0247037	3	7	Up-regulated
Sus_scrofa___FBN2	2.27404	6.26837	14.7788	0.000662646	0.0247862	3	7	Up-regulated
Sus_scrofa___TMEM192	1.11219	3.37136	14.735	0.000675391	0.0250749	3	7	Up-regulated
Sus_scrofa___KATNBL1	1.54939	7.85556	14.702	0.000680148	0.025214	3	7	Up-regulated
Sus_scrofa___CAMK1	1.3413	3.61327	14.7126	0.000681451	0.0252248	3	7	Up-regulated
Sus_scrofa___SGK1	2.29116	1.74494	14.5396	0.000690897	0.0254988	3	7	Up-regulated
Sus_scrofa___MARCHF3	1.20433	8.18581	14.6187	0.000699884	0.0257923	3	7	Up-regulated
Sus_scrofa___SLCO3A1	1.05899	10.0534	14.5955	0.000705501	0.0259179	3	7	Up-regulated
Sus_scrofa___ENSSSCG00000036469	2.28874	0.962712	13.8441	0.000706409	0.0259179	3	7	Up-regulated
Sus_scrofa___TMOD3	0.831019	6.00653	14.5631	0.00071348	0.0261389	3	7	Up-regulated
Sus_scrofa___SYAP1	1.07644	5.43086	14.5587	0.000714653	0.0261435	3	7	Up-regulated
Sus_scrofa___PHF11	1.18903	6.76961	14.5453	0.000717814	0.0261824	3	7	Up-regulated
pCMV_____gp06	6.37622	-0.282113	20.0002	0.000721555	0.0262804	3	7	Up-regulated
Sus_scrofa___TMED7	0.990886	4.41981	14.4398	0.000745066	0.0269673	3	7	Up-regulated
Sus_scrofa___UTRN	0.865389	9.07193	14.3497	0.000767949	0.0275677	3	7	Up-regulated
Sus_scrofa___ENSSSCG00000003072	0.787627	4.81184	14.3076	0.000779594	0.0279054	3	7	Up-regulated
Sus_scrofa___TTC39A	1.80698	3.59729	14.3139	0.000782294	0.0279136	3	7	Up-regulated
Sus_scrofa___ZMYND8	0.832412	7.74729	14.2936	0.000783038	0.0279136	3	7	Up-regulated
Sus_scrofa___TMEM181	0.884559	4.34891	14.2953	0.000783178	0.0279136	3	7	Up-regulated
Sus_scrofa___ARPC5	1.32367	4.22901	14.2821	0.000787142	0.0279762	3	7	Up-regulated
Sus_scrofa___IGF2BP3	0.889555	6.95762	14.2693	0.000789698	0.0280225	3	7	Up-regulated
Sus_scrofa___MYO5A	0.687463	7.47076	14.2655	0.000790728	0.0280225	3	7	Up-regulated
Sus_scrofa___ATP6V0D1	0.852498	4.59112	14.259	0.000792932	0.0280608	3	7	Up-regulated
Sus_scrofa___ENSSSCG00000012101	2.49442	0.227072	12.9583	0.000795548	0.0281135	3	7	Up-regulated
Sus_scrofa___TCTN2	1.54314	5.46107	14.1797	0.000814817	0.028724	3	7	Up-regulated
Sus_scrofa___ZNF280B	1.32196	2.27847	14.212	0.000815126	0.028724	3	7	Up-regulated
Sus_scrofa___ENSSSCG00000004578	1.85931	4.73887	14.1547	0.000822956	0.0288775	3	7	Up-regulated
Sus_scrofa___NOL3	1.52911	2.61625	14.1813	0.000824304	0.0288842	3	7	Up-regulated
Sus_scrofa___ZNF197	1.16471	3.2309	14.1437	0.000829084	0.0289607	3	7	Up-regulated
Sus_scrofa___PSMD4	0.75075	5.2524	14.1269	0.000829971	0.0289607	3	7	Up-regulated
Sus_scrofa___FAM162A	0.823202	7.60834	14.0946	0.000839185	0.0292414	3	7	Up-regulated
pCMV_____gp60	6.38739	-0.268685	19.2387	0.000841131	0.0292683	3	7	Up-regulated
Sus_scrofa___IRF2	0.901017	6.73705	14.0203	0.000861261	0.029616	3	7	Up-regulated
pCMV_____gp39	6.35245	-0.283888	19.1082	0.000861807	0.029616	3	7	Up-regulated
Sus_scrofa___GABARAPL2	0.737074	5.13502	13.9933	0.000869622	0.0298435	3	7	Up-regulated
pCMV_____gp26	6.47196	-0.223185	19.081	0.000872963	0.0298759	3	7	Up-regulated
Sus_scrofa___RBAK	0.811088	4.29009	13.9453	0.00088481	0.0301573	3	7	Up-regulated
Sus_scrofa___FSTL3	1.58103	4.56949	13.9317	0.000889391	0.0302721	3	7	Up-regulated
Sus_scrofa___COX2	1.86073	4.79089	13.9053	0.000897092	0.0304511	3	7	Up-regulated
Papio_anubis_YTHDF2	4.84475	-0.610059	13.9022	0.000899912	0.0305053	3	7	Up-regulated
Sus_scrofa___LGALS3BP	3.56731	2.43705	14.3313	0.000906244	0.0306783	3	7	Up-regulated
pCMV_____gp43	6.15038	-0.370677	18.7672	0.00091047	0.0307598	3	7	Up-regulated
Sus_scrofa___HSPB1	1.7083	6.26894	13.8559	0.000912352	0.0307598	3	7	Up-regulated
Sus_scrofa___SNIP1	1.10051	2.95818	13.8672	0.00091546	0.030823	3	7	Up-regulated
Sus_scrofa___LAMTOR1	1.31861	2.57315	13.8592	0.000920707	0.0309579	3	7	Up-regulated
Sus_scrofa___ENSSSCG00000033786	1.66716	7.1212	13.8216	0.000923372	0.0310057	3	7	Up-regulated
Sus_scrofa___SQSTM1	0.94108	6.7026	13.7633	0.000942499	0.0313944	3	7	Up-regulated
Sus_scrofa___KDM4B	0.702019	7.50633	13.7543	0.000945466	0.0314203	3	7	Up-regulated
Sus_scrofa___GJA1	0.933513	7.56411	13.7531	0.000945866	0.0314203	3	7	Up-regulated
pCMV_____gp59	6.10722	-0.387331	18.558	0.000947448	0.0314203	3	7	Up-regulated
pCMV_____gp41	6.55103	-0.189634	18.6972	0.000948315	0.0314203	3	7	Up-regulated
Sus_scrofa___TTC28	0.773446	9.4757	13.7137	0.000959081	0.0317349	3	7	Up-regulated
Sus_scrofa___ENSSSCG00000029035	0.840491	4.70082	13.6976	0.000965037	0.0318897	3	7	Up-regulated
Sus_scrofa___FAM172A	0.766976	8.1635	13.6917	0.00096656	0.0318963	3	7	Up-regulated
Sus_scrofa___PSMB4	1.14584	3.20099	13.6792	0.000975734	0.0320777	3	7	Up-regulated
Sus_scrofa___ARHGEF3	1.36756	6.5552	13.6609	0.000977155	0.0320777	3	7	Up-regulated
Sus_scrofa___SNX19	0.983431	5.08228	13.6502	0.000981122	0.0321234	3	7	Up-regulated
Sus_scrofa___SREBF2	0.862478	5.4017	13.59	0.00100211	0.0327246	3	7	Up-regulated
Sus_scrofa___PPP1R3C	1.41542	6.79337	13.5632	0.0010115	0.032988	3	7	Up-regulated
Sus_scrofa___INSIG1	1.64203	1.72051	13.5376	0.00101311	0.0329974	3	7	Up-regulated
Papio_anubis_ITPR2	4.74875	-0.492876	14.0138	0.00102444	0.0333214	3	7	Up-regulated
Sus_scrofa___MCPH1	0.901085	5.39389	13.5244	0.00102573	0.0333214	3	7	Up-regulated
Sus_scrofa___XIRP2	1.89644	6.76853	13.5057	0.00103234	0.0334926	3	7	Up-regulated
Sus_scrofa___HMGA1	1.6519	2.51807	13.4973	0.00104773	0.0338218	3	7	Up-regulated
Sus_scrofa___PRRG3	2.2307	0.358782	12.528	0.00104877	0.0338218	3	7	Up-regulated
Sus_scrofa___FAM199X	0.979363	4.39399	13.4582	0.00105062	0.0338218	3	7	Up-regulated
Sus_scrofa___TPR	0.609831	6.41915	13.4387	0.00105719	0.0339458	3	7	Up-regulated
Sus_scrofa___RHBDD1	0.977213	5.47002	13.4265	0.00106194	0.0340543	3	7	Up-regulated
Sus_scrofa___HK3	1.06637	4.65851	13.4095	0.00106876	0.034229	3	7	Up-regulated
Sus_scrofa___EPN3	1.74289	0.208573	12.3906	0.00107238	0.0343012	3	7	Up-regulated
Sus_scrofa___G6PD	1.39969	2.68221	13.4214	0.00107627	0.0343814	3	7	Up-regulated
Sus_scrofa___TBC1D16	0.821216	5.79745	13.3794	0.00107979	0.0343927	3	7	Up-regulated
Papio_anubis_BIRC6	4.08911	-0.0752691	13.8931	0.00108066	0.0343927	3	7	Up-regulated
Papio_anubis_ENSPANG00000022123	4.53433	-0.642686	13.179	0.00108454	0.0344078	3	7	Up-regulated
Sus_scrofa___EIF2AK2	2.63224	8.31287	13.3639	0.00108574	0.0344078	3	7	Up-regulated
Sus_scrofa___PTPN14	0.819534	7.69016	13.361	0.00108675	0.0344078	3	7	Up-regulated
Sus_scrofa___NHLRC3	0.802047	8.59897	13.3264	0.00110023	0.0347396	3	7	Up-regulated
Sus_scrofa___ENSSSCG00000034570	3.52734	5.87584	13.5171	0.00110321	0.0347396	3	7	Up-regulated
Sus_scrofa___FJX1	2.51535	0.74304	12.6982	0.00110419	0.0347396	3	7	Up-regulated
Papio_anubis_EEA1	1.88118	1.84647	12.9909	0.00111842	0.0350987	3	7	Up-regulated
Sus_scrofa___TNFAIP3	1.48623	2.77846	13.2317	0.00113035	0.0353889	3	7	Up-regulated
Sus_scrofa___CMTM8	1.94982	3.41786	13.2585	0.00113396	0.0354083	3	7	Up-regulated
pCMV_____gp57	5.98429	-0.430169	17.6451	0.00113752	0.0354418	3	7	Up-regulated
Sus_scrofa___USP18	2.61638	5.88	13.2408	0.0011382	0.0354418	3	7	Up-regulated
pCMV_____gp03	5.72078	-0.49614	16.0035	0.0011393	0.0354418	3	7	Up-regulated
Sus_scrofa___UBXN1	1.4635	2.18603	13.2427	0.00114602	0.0355269	3	7	Up-regulated
Sus_scrofa___SERP2	1.11205	4.42183	13.1629	0.00116761	0.0360082	3	7	Up-regulated
Sus_scrofa___DHX58	2.52559	2.66444	12.5863	0.00117721	0.0362596	3	7	Up-regulated
Sus_scrofa___TMEM135	1.09285	8.89598	13.1332	0.00117891	0.0362671	3	7	Up-regulated
Sus_scrofa___CD44	1.29817	7.24777	13.0982	0.00119383	0.0365672	3	7	Up-regulated
Sus_scrofa___AVL9	0.746194	6.59491	13.0966	0.00119453	0.0365672	3	7	Up-regulated
Sus_scrofa___ORAI3	1.7637	1.6533	12.9452	0.00120642	0.036751	3	7	Up-regulated
Sus_scrofa___SOCS6	0.866414	4.65212	13.0427	0.00121839	0.0370176	3	7	Up-regulated
Sus_scrofa___GMFB	1.05075	2.90613	13.0605	0.00121963	0.0370176	3	7	Up-regulated
pCMV_____gp52	6.17188	-0.355341	17.3729	0.00122607	0.0371679	3	7	Up-regulated
Sus_scrofa___CDK7	0.806547	5.01268	13.0185	0.00122886	0.0372074	3	7	Up-regulated
Sus_scrofa___PSMC6	0.669425	7.55029	13.0046	0.00123465	0.0372541	3	7	Up-regulated
Sus_scrofa___C5orf51	0.765515	4.77276	12.9732	0.00124913	0.0375023	3	7	Up-regulated
Sus_scrofa___EARS2	0.971088	3.91237	12.9585	0.00125783	0.0375829	3	7	Up-regulated
Sus_scrofa___ENSSSCG00000015645	0.939931	6.29908	12.9042	0.00128023	0.0380696	3	7	Up-regulated
Sus_scrofa___ZFP30	0.885367	4.67933	12.8663	0.00129832	0.0384244	3	7	Up-regulated
Sus_scrofa___SPTLC2	1.0996	4.44741	12.8429	0.00131014	0.0387008	3	7	Up-regulated
Sus_scrofa___JPT2	1.21727	1.96672	12.8634	0.00131168	0.0387008	3	7	Up-regulated
Sus_scrofa___ENSSSCG00000038144	1.30877	8.3249	12.8355	0.00131231	0.0387008	3	7	Up-regulated
Sus_scrofa___TRIM54	1.08246	7.72504	12.8172	0.00132101	0.0388655	3	7	Up-regulated
Sus_scrofa___WIPI1	0.959673	7.24403	12.7879	0.00133512	0.0391678	3	7	Up-regulated
Sus_scrofa___PRXL2A	2.34583	0.0449735	11.9723	0.00133969	0.0391687	3	7	Up-regulated
pCMV_____gp17	6.04506	-0.404808	16.9086	0.00134396	0.0391687	3	7	Up-regulated
Sus_scrofa___RBCK1	0.884133	4.09862	12.7725	0.001344	0.0391687	3	7	Up-regulated
Sus_scrofa___TSKU	2.13833	0.354968	11.8404	0.00135557	0.0393006	3	7	Up-regulated
Sus_scrofa___MGST3	1.05592	4.55627	12.7464	0.00135628	0.0393006	3	7	Up-regulated
Sus_scrofa___TNFRSF1B	3.61132	0.0999288	12.0395	0.00136504	0.0394183	3	7	Up-regulated
Sus_scrofa___ENSSSCG00000008892	0.665544	6.26225	12.7196	0.00136866	0.0394427	3	7	Up-regulated
Sus_scrofa___BAMBI	2.47146	0.348438	11.7087	0.00137039	0.0394427	3	7	Up-regulated
Sus_scrofa___VPS53	0.67788	6.82817	12.683	0.00138692	0.0396772	3	7	Up-regulated
pCMV_____gp34	5.75426	-0.510882	16.6379	0.00138749	0.0396772	3	7	Up-regulated
Papio_anubis_USP34	2.99346	0.326921	12.0843	0.00138828	0.0396772	3	7	Up-regulated
Sus_scrofa___IFI44L	2.64454	6.24865	12.6859	0.00138836	0.0396772	3	7	Up-regulated
Sus_scrofa___ABHD17C	0.977217	5.1444	12.6772	0.00139019	0.039684	3	7	Up-regulated
Sus_scrofa___ENSSSCG00000037602	1.46074	2.36962	12.6928	0.00139636	0.0397971	3	7	Up-regulated
Sus_scrofa___SPECC1	1.41503	6.71243	12.6552	0.00140101	0.0398562	3	7	Up-regulated
Sus_scrofa___S100A11	2.52109	1.12058	11.7813	0.00143757	0.0408495	3	7	Up-regulated
Sus_scrofa___BLOC1S2	1.26442	2.53356	12.6056	0.00144031	0.0408809	3	7	Up-regulated
Sus_scrofa___LRIG2	0.675782	7.45108	12.5634	0.00144854	0.0409284	3	7	Up-regulated
Sus_scrofa___ENSSSCG00000045560	1.12794	5.28154	12.5252	0.0014692	0.0411923	3	7	Up-regulated
Sus_scrofa___FHDC1	1.53511	3.66449	12.5274	0.00147193	0.0411923	3	7	Up-regulated
Sus_scrofa___POC1B	1.06152	3.94417	12.5119	0.00147798	0.0411923	3	7	Up-regulated
Sus_scrofa___JMJD4	1.05539	2.62028	12.5299	0.00147908	0.0411923	3	7	Up-regulated
pCMV_____gp47	5.78824	-0.501864	16.3617	0.00148263	0.041212	3	7	Up-regulated
pCMV_____gp40	5.90407	-0.456398	16.3783	0.00149465	0.041212	3	7	Up-regulated
Sus_scrofa___PDK1	1.00344	6.90638	12.475	0.00149612	0.041212	3	7	Up-regulated
Sus_scrofa___SUSD6	1.02276	5.62533	12.4744	0.00149658	0.041212	3	7	Up-regulated
Sus_scrofa___ENSSSCG00000012046	0.897057	4.69314	12.4515	0.00150959	0.0414252	3	7	Up-regulated
Sus_scrofa___TOR1AIP2	1.00175	3.74773	12.4496	0.00151262	0.0414252	3	7	Up-regulated
Sus_scrofa___COP1	0.70332	7.40842	12.438	0.00151647	0.0414852	3	7	Up-regulated
Sus_scrofa___MTPAP	0.621147	7.31725	12.4213	0.00152577	0.0416803	3	7	Up-regulated
Sus_scrofa___C4orf51	0.761791	4.96946	12.4199	0.00152695	0.0416803	3	7	Up-regulated
Sus_scrofa___SLC25A13	0.611005	7.95723	12.4017	0.00153674	0.0418366	3	7	Up-regulated
Sus_scrofa___TASOR	0.696272	6.55749	12.4001	0.0015377	0.0418366	3	7	Up-regulated
Sus_scrofa___KDM4C	0.895616	9.18697	12.3732	0.00155286	0.0421256	3	7	Up-regulated
Sus_scrofa___TUBGCP3	0.738267	4.96677	12.3708	0.00155464	0.0421256	3	7	Up-regulated
Sus_scrofa___SERGEF	1.13191	5.85399	12.3697	0.00155508	0.0421256	3	7	Up-regulated
Sus_scrofa___WDFY3	0.616549	8.1838	12.3571	0.00156207	0.042269	3	7	Up-regulated
Sus_scrofa___OTUD1	2.23354	3.67128	12.3495	0.0015708	0.0424592	3	7	Up-regulated
Sus_scrofa___PTP4A2	0.738764	8.22454	12.3286	0.00157846	0.0426202	3	7	Up-regulated
Sus_scrofa___NPPB	2.86035	7.46233	12.317	0.00158743	0.0427237	3	7	Up-regulated
Sus_scrofa___ENSSSCG00000011237	0.719026	6.72183	12.2979	0.00159643	0.0428389	3	7	Up-regulated
Sus_scrofa___DLG5	0.965681	6.69755	12.2904	0.00160083	0.0428389	3	7	Up-regulated
Sus_scrofa___DES	1.73749	8.7491	12.2885	0.00160188	0.0428389	3	7	Up-regulated
Sus_scrofa___C12orf66	1.17301	3.02711	12.2913	0.00161036	0.04297	3	7	Up-regulated
Sus_scrofa___FGFR1	0.658393	8.91513	12.2656	0.00161545	0.0430596	3	7	Up-regulated
Sus_scrofa___KIF3B	0.8689	5.08234	12.2565	0.00162128	0.0431229	3	7	Up-regulated
Sus_scrofa___MYO1A	2.23953	-0.0667498	11.5053	0.00163164	0.0433062	3	7	Up-regulated
Papio_anubis_FOXJ3	2.10341	2.49464	12.2271	0.00165561	0.043741	3	7	Up-regulated
Papio_anubis_RNF19A	5.09923	-0.453417	12.1184	0.00165992	0.043741	3	7	Up-regulated
Sus_scrofa___PJA1	1.3942	2.80386	12.2139	0.00166008	0.043741	3	7	Up-regulated
Sus_scrofa___NLRC5	2.25686	6.0725	12.1947	0.00166124	0.043741	3	7	Up-regulated
Sus_scrofa___NANS	0.892273	6.0448	12.1714	0.00167257	0.0439253	3	7	Up-regulated
Sus_scrofa___SS18	0.791093	8.02207	12.1618	0.00167839	0.0439855	3	7	Up-regulated
Papio_anubis_KMT2A	3.1643	0.213213	11.6211	0.00168456	0.0440545	3	7	Up-regulated
Sus_scrofa___PRR14L	0.71402	5.85574	12.1478	0.00168722	0.0440778	3	7	Up-regulated
Sus_scrofa___TM2D1	0.701388	6.00334	12.1308	0.00169781	0.0443083	3	7	Up-regulated
Sus_scrofa___FUT11	1.24591	3.94083	12.1084	0.00171637	0.0447457	3	7	Up-regulated
Sus_scrofa___SDR42E1	1.86641	1.94516	12.0261	0.00172411	0.0447795	3	7	Up-regulated
Sus_scrofa___RAP1B	0.814546	6.97827	12.088	0.00172484	0.0447795	3	7	Up-regulated
Sus_scrofa___ETS2	1.62055	6.38308	12.0821	0.00172865	0.0447852	3	7	Up-regulated
Sus_scrofa___RPUSD3	1.30503	3.13197	12.0934	0.00173138	0.0448094	3	7	Up-regulated
Sus_scrofa___EZR	1.24114	6.68076	12.0722	0.00173494	0.044855	3	7	Up-regulated
Sus_scrofa___RNF115	0.721586	7.61658	12.0633	0.00174062	0.0449553	3	7	Up-regulated
Sus_scrofa___CASP7	1.01611	4.64257	12.0366	0.00175888	0.0452862	3	7	Up-regulated
Sus_scrofa___RAB3B	2.26188	3.08162	12.0292	0.00177316	0.0455598	3	7	Up-regulated
Sus_scrofa___ADGRB1	1.42541	3.32989	12.0137	0.00178072	0.0457071	3	7	Up-regulated
Sus_scrofa___AEN	1.08736	3.20276	11.9741	0.00180597	0.0461784	3	7	Up-regulated
Sus_scrofa___IFIH1	2.83053	6.40279	11.9646	0.00181291	0.0462478	3	7	Up-regulated
pCMV_____gp24	6.00142	-0.438268	15.5547	0.00182188	0.046429	3	7	Up-regulated
Sus_scrofa___NPPA	2.94909	5.45109	11.9321	0.00183021	0.0464989	3	7	Up-regulated
Sus_scrofa___NYX	1.37954	3.5061	11.9063	0.00185259	0.0470033	3	7	Up-regulated
Sus_scrofa___ENSSSCG00000002935	0.892588	4.77716	11.8938	0.00185428	0.0470033	3	7	Up-regulated
Sus_scrofa___ENSSSCG00000010448	1.02044	4.44658	11.8897	0.0018576	0.0470033	3	7	Up-regulated
Sus_scrofa___STX8	0.709772	7.03634	11.8777	0.00186471	0.0470939	3	7	Up-regulated
pCMV_____gp62	5.62741	-0.547621	15.2926	0.00186904	0.0471018	3	7	Up-regulated
Sus_scrofa___DOCK1	0.676232	8.96931	11.86	0.00187703	0.0472093	3	7	Up-regulated
Sus_scrofa___TPH2	1.23101	2.52667	11.8716	0.00188604	0.0473388	3	7	Up-regulated
pCMV_____gp04	5.46146	-0.596773	15.1412	0.00189922	0.0475738	3	7	Up-regulated
Sus_scrofa___NFYA	1.01488	4.29317	11.8262	0.00190228	0.0476029	3	7	Up-regulated
Sus_scrofa___CTSH	1.62812	4.94875	11.8179	0.00190859	0.0477129	3	7	Up-regulated
Sus_scrofa___ENSSSCG00000009303	1.91785	3.15718	11.7457	0.00191243	0.047761	3	7	Up-regulated
Sus_scrofa___H2BC11	4.5385	-0.571337	11.9931	0.00194126	0.0482876	3	7	Up-regulated
Sus_scrofa___MMAA	0.69176	4.66416	11.7615	0.00194803	0.0483022	3	7	Up-regulated
Sus_scrofa___TENT4A	0.952148	5.14208	11.7588	0.00194959	0.0483022	3	7	Up-regulated
Sus_scrofa___CNN3	2.25518	2.49138	12.0885	0.00195236	0.0483228	3	7	Up-regulated
Sus_scrofa___ZNF12	0.789636	4.36905	11.7237	0.00197617	0.0487804	3	7	Up-regulated
Sus_scrofa___YAE1	1.12159	4.04505	11.7189	0.00198059	0.0488278	3	7	Up-regulated
Sus_scrofa___ZBTB37	0.755161	5.63254	11.6735	0.00201266	0.0493745	3	7	Up-regulated
Sus_scrofa___LYN	1.14989	2.73467	11.6491	0.00201606	0.0494094	3	7	Up-regulated
Sus_scrofa___SLC25A17	0.630175	5.82377	11.6554	0.0020263	0.049563	3	7	Up-regulated
Sus_scrofa___WWC2	0.758971	7.70813	11.6464	0.00203299	0.0496778	3	7	Up-regulated
Sus_scrofa___C7orf25	1.29641	1.78823	11.621	0.00204228	0.0497586	3	7	Up-regulated
Sus_scrofa___HSD11B1L	2.10711	3.74983	11.6435	0.00204785	0.0498456	3	7	Up-regulated
Sus_scrofa___ADAMTSL1	-3.30868	7.83679	103.225	9.51373e-11	1.18679e-06	3	7	Down-regulated
Sus_scrofa___ZBTB7C	-3.07487	5.35863	58.2978	3.17785e-08	4.95525e-05	3	7	Down-regulated
Sus_scrofa___RNF207	-2.37508	6.57863	50.0086	1.2893e-07	0.000144321	3	7	Down-regulated
Sus_scrofa___SMTN	-2.72368	5.75773	49.4817	1.42203e-07	0.000147826	3	7	Down-regulated
Sus_scrofa___ADAMTS6	-2.84748	7.75776	47.5946	1.99881e-07	0.000178101	3	7	Down-regulated
Sus_scrofa___ENSSSCG00000036052	-1.78387	9.47952	44.2188	3.78888e-07	0.000255483	3	7	Down-regulated
Papio_anubis_TPM2	-2.65812	3.33808	43.5332	4.17978e-07	0.000267636	3	7	Down-regulated
Sus_scrofa___ENOX1	-3.33537	9.20164	43.7101	4.18365e-07	0.000267636	3	7	Down-regulated
Sus_scrofa___MYLK3	-2.00625	8.20453	42.4988	5.31271e-07	0.000308248	3	7	Down-regulated
Sus_scrofa___GRM5	-4.09268	6.05398	40.8037	7.5124e-07	0.000398781	3	7	Down-regulated
Sus_scrofa___ENSSSCG00000039552	-5.50395	3.61259	38.8851	8.35501e-07	0.000424818	3	7	Down-regulated
Sus_scrofa___ENSSSCG00000003839	-2.16364	7.3186	39.6469	9.48933e-07	0.000457133	3	7	Down-regulated
Sus_scrofa___DAPL1	-4.58742	4.02863	35.5945	1.82148e-06	0.000718398	3	7	Down-regulated
Sus_scrofa___RUNX1T1	-1.23372	8.2871	36.459	1.87165e-06	0.000718398	3	7	Down-regulated
Sus_scrofa___ACOT11	-2.32328	8.4409	36.1856	1.98725e-06	0.000751209	3	7	Down-regulated
Sus_scrofa___ENSSSCG00000048752	-2.83802	4.27813	35.2721	2.42905e-06	0.000841698	3	7	Down-regulated
Sus_scrofa___GRB14	-2.40313	6.55346	35.0899	2.5357e-06	0.000866618	3	7	Down-regulated
Sus_scrofa___CRYBG3	-2.18565	10.1608	34.8091	2.69793e-06	0.000897484	3	7	Down-regulated
Sus_scrofa___CORIN	-3.09131	9.13863	34.6607	2.78964e-06	0.000897484	3	7	Down-regulated
Sus_scrofa___TBX20	-1.75873	7.20561	34.635	2.80587e-06	0.000897484	3	7	Down-regulated
Sus_scrofa___PLEKHM3	-1.71482	8.13613	33.9207	3.29906e-06	0.00100376	3	7	Down-regulated
Sus_scrofa___SH3KBP1	-1.69378	5.83892	33.5356	3.60499e-06	0.00107072	3	7	Down-regulated
Sus_scrofa___CPED1	-1.8316	8.66814	33.0777	4.00409e-06	0.0011352	3	7	Down-regulated
Sus_scrofa___ENSSSCG00000033405	-3.80247	3.69145	32.3077	4.49308e-06	0.00123185	3	7	Down-regulated
Sus_scrofa___ASB11	-2.74177	4.87062	32.2575	4.87594e-06	0.00129415	3	7	Down-regulated
Sus_scrofa___OSBPL3	-1.23523	8.22409	31.898	5.27613e-06	0.0013517	3	7	Down-regulated
Sus_scrofa___ISM1	-4.34549	4.69998	31.7187	5.3976e-06	0.00136025	3	7	Down-regulated
Sus_scrofa___KCNJ3	-1.33509	9.50929	31.0413	6.46973e-06	0.00158248	3	7	Down-regulated
Sus_scrofa___DCLRE1A	-1.38379	6.06028	30.7997	6.85948e-06	0.00166153	3	7	Down-regulated
Sus_scrofa___ASB12	-5.46536	0.550635	29.2559	6.96438e-06	0.00167072	3	7	Down-regulated
Sus_scrofa___ENSSSCG00000038605	-6.31613	2.77411	29.702	7.25629e-06	0.0017016	3	7	Down-regulated
Sus_scrofa___ENSSSCG00000045296	-2.98269	3.27319	29.8848	8.14411e-06	0.00186411	3	7	Down-regulated
Sus_scrofa___ENSSSCG00000049530	-4.51843	3.20654	29.1386	8.41913e-06	0.00189673	3	7	Down-regulated
Sus_scrofa___PDE4D	-1.40416	13.1716	29.945	8.4387e-06	0.00189673	3	7	Down-regulated
Sus_scrofa___ADRA1A	-3.72944	6.23607	29.3736	9.74831e-06	0.00207872	3	7	Down-regulated
Sus_scrofa___MMP11	-3.0555	6.69218	28.7219	1.14318e-05	0.0022794	3	7	Down-regulated
Sus_scrofa___CCK	-3.60048	5.18615	28.7048	1.15116e-05	0.0022794	3	7	Down-regulated
Sus_scrofa___CHCHD3	-3.05075	2.44518	27.7375	1.27194e-05	0.00245997	3	7	Down-regulated
Sus_scrofa___SLC9B2	-1.62653	8.43441	28.1216	1.32877e-05	0.00255012	3	7	Down-regulated
Sus_scrofa___ACTC1	-4.57462	7.1299	28.0168	1.36609e-05	0.00260172	3	7	Down-regulated
Sus_scrofa___MYOCD	-1.51804	10.1466	27.9049	1.4039e-05	0.00265011	3	7	Down-regulated
Sus_scrofa___GBA2	-1.20353	5.74211	27.8819	1.41274e-05	0.00265011	3	7	Down-regulated
Sus_scrofa___ENSSSCG00000015036	-1.67471	4.14792	27.5546	1.54268e-05	0.00283002	3	7	Down-regulated
Sus_scrofa___ENSSSCG00000044539	-3.42237	4.05853	27.3186	1.60886e-05	0.00287835	3	7	Down-regulated
Sus_scrofa___STXBP6	-2.24515	7.67123	27.3569	1.61517e-05	0.00287835	3	7	Down-regulated
Sus_scrofa___ENSSSCG00000003781	-3.83427	3.68788	27.008	1.65997e-05	0.0029372	3	7	Down-regulated
Sus_scrofa___PREX2	-2.60109	3.56197	27.0593	1.75061e-05	0.0030284	3	7	Down-regulated
Sus_scrofa___ROS1	-4.57394	3.60706	26.2037	1.81081e-05	0.00307333	3	7	Down-regulated
Papio_anubis_ENSPANG00000029693	-2.28744	1.95674	26.0129	2.08389e-05	0.0033602	3	7	Down-regulated
Sus_scrofa___STUM	-3.75784	0.898882	24.117	2.10084e-05	0.0033602	3	7	Down-regulated
Sus_scrofa___JADE1	-1.70891	8.48381	26.3278	2.10982e-05	0.0033602	3	7	Down-regulated
Sus_scrofa___CHN1	-1.48452	7.52033	26.2082	2.17715e-05	0.0033602	3	7	Down-regulated
Sus_scrofa___HOMER1	-1.19099	8.72058	26.2057	2.17857e-05	0.0033602	3	7	Down-regulated
Sus_scrofa___GASK1B	-2.30389	5.45634	26.1857	2.19533e-05	0.0033602	3	7	Down-regulated
Sus_scrofa___PIGQ	-1.32277	5.34532	26.0045	2.29886e-05	0.00345507	3	7	Down-regulated
Sus_scrofa___PCDH17	-6.42158	0.725747	24.7163	2.36242e-05	0.00346706	3	7	Down-regulated
Sus_scrofa___ENSSSCG00000031075	-3.22169	3.04101	25.4096	2.44236e-05	0.0035252	3	7	Down-regulated
Sus_scrofa___KLHL31	-1.72314	6.83423	25.7035	2.48804e-05	0.00355131	3	7	Down-regulated
Sus_scrofa___ENSSSCG00000001001	-2.29323	1.37953	24.9661	2.5588e-05	0.00358648	3	7	Down-regulated
Sus_scrofa___EPHA7	-1.35397	6.53112	25.554	2.58906e-05	0.00360347	3	7	Down-regulated
Sus_scrofa___RAMP1	-1.29278	7.8617	25.4984	2.6274e-05	0.0036216	3	7	Down-regulated
Sus_scrofa___PDE3B	-1.28998	9.46983	25.2838	2.78244e-05	0.00376292	3	7	Down-regulated
Sus_scrofa___CA14	-2.88892	4.88529	25.2609	2.81142e-05	0.00377108	3	7	Down-regulated
Sus_scrofa___PDZRN4	-2.55949	4.45783	25.1764	2.87247e-05	0.00381352	3	7	Down-regulated
Sus_scrofa___CMTM5	-3.58986	6.99492	25.1458	2.88891e-05	0.00381352	3	7	Down-regulated
Sus_scrofa___TPST2	-1.60178	5.28003	24.9522	3.0445e-05	0.00391532	3	7	Down-regulated
Sus_scrofa___IL2RA	-2.6616	1.5291	24.1085	3.25224e-05	0.00404668	3	7	Down-regulated
Sus_scrofa___SCARF1	-1.43848	5.44536	24.5735	3.37242e-05	0.00412444	3	7	Down-regulated
Sus_scrofa___TMEM52B	-2.06941	4.09346	24.3276	3.62337e-05	0.00432534	3	7	Down-regulated
Sus_scrofa___ENSSSCG00000047475	-2.72861	3.3644	24.0984	3.7718e-05	0.00448108	3	7	Down-regulated
Sus_scrofa___SEMA4C	-2.52996	1.8623	23.5666	3.84125e-05	0.00454196	3	7	Down-regulated
Sus_scrofa___SLC38A3	-2.16843	3.18115	24.0505	3.86606e-05	0.00454973	3	7	Down-regulated
Sus_scrofa___ENSSSCG00000041764	-1.25871	8.27933	24.0527	3.88571e-05	0.00455138	3	7	Down-regulated
Sus_scrofa___ENSSSCG00000012700	-1.50697	6.49102	23.5347	4.48409e-05	0.00502125	3	7	Down-regulated
Sus_scrofa___WSCD2	-3.39132	4.78652	23.5344	4.5002e-05	0.00502125	3	7	Down-regulated
Sus_scrofa___GNAO1	-2.59892	5.15167	23.3006	4.81003e-05	0.00530997	3	7	Down-regulated
Sus_scrofa___FHL2	-2.0875	10.9015	23.2657	4.8323e-05	0.00531105	3	7	Down-regulated
Papio_anubis_RBFOX1	-5.34808	0.694903	21.8809	4.93141e-05	0.00536241	3	7	Down-regulated
Sus_scrofa___ENSSSCG00000043759	-3.17766	2.85783	22.7372	4.96499e-05	0.00536241	3	7	Down-regulated
Sus_scrofa___CDH9	-3.68858	4.34739	22.7141	5.09653e-05	0.00537568	3	7	Down-regulated
Sus_scrofa___PLEKHA6	-1.82116	6.28587	23.0696	5.10656e-05	0.00537568	3	7	Down-regulated
Sus_scrofa___CCDC141	-1.17779	9.96359	23.0276	5.16565e-05	0.00539065	3	7	Down-regulated
Sus_scrofa___ZNF804B	-2.25917	9.37352	23.0199	5.17675e-05	0.00539065	3	7	Down-regulated
Sus_scrofa___PEX5L	-2.19734	5.4037	22.8918	5.37313e-05	0.00546507	3	7	Down-regulated
Sus_scrofa___KCNIP2	-2.72026	5.55065	22.896	5.37732e-05	0.00546507	3	7	Down-regulated
Sus_scrofa___ENSSSCG00000049101	-2.3887	2.64372	22.6868	5.39991e-05	0.00546507	3	7	Down-regulated
Sus_scrofa___GDPD2	-3.91469	3.1112	22.3466	5.40131e-05	0.00546507	3	7	Down-regulated
Sus_scrofa___ENSSSCG00000050759	-3.44622	1.78527	22.1428	5.41138e-05	0.00546507	3	7	Down-regulated
Sus_scrofa___DACH1	-1.50966	9.77118	22.8463	5.43597e-05	0.00546507	3	7	Down-regulated
Sus_scrofa___ENSSSCG00000034367	-3.18349	2.20892	22.3503	5.45434e-05	0.00546507	3	7	Down-regulated
Sus_scrofa___ENSSSCG00000048278	-2.2713	3.17783	22.761	5.52073e-05	0.00548752	3	7	Down-regulated
Sus_scrofa___GABRA4	-1.87731	6.16334	22.7614	5.56995e-05	0.00551448	3	7	Down-regulated
Sus_scrofa___MTSS2	-1.47889	5.5256	22.7154	5.64347e-05	0.00554327	3	7	Down-regulated
Sus_scrofa___ENSSSCG00000042688	-3.49545	2.5586	22.3063	5.75102e-05	0.00558203	3	7	Down-regulated
Sus_scrofa___BMP5	-1.75179	5.50746	22.6378	5.77243e-05	0.00558203	3	7	Down-regulated
Sus_scrofa___ENSSSCG00000039326	-5.95988	0.824596	22.8397	5.96981e-05	0.00568476	3	7	Down-regulated
Sus_scrofa___ASB14	-2.3139	4.15023	22.491	6.02816e-05	0.0057185	3	7	Down-regulated
Sus_scrofa___TMEM120B	-1.35971	7.11114	22.3456	6.26517e-05	0.00587631	3	7	Down-regulated
Sus_scrofa___WNK2	-1.33858	8.19246	22.2358	6.46418e-05	0.00601771	3	7	Down-regulated
Sus_scrofa___ADAMTS9	-1.56016	7.8276	22.209	6.51392e-05	0.00602665	3	7	Down-regulated
Sus_scrofa___ATP2A2	-1.48325	11.1281	22.1006	6.71893e-05	0.00607825	3	7	Down-regulated
Sus_scrofa___SLC2A4	-1.527	6.66688	22.0354	6.8464e-05	0.00614427	3	7	Down-regulated
Sus_scrofa___CYTIP	-3.62851	3.93559	21.7165	7.0607e-05	0.00623333	3	7	Down-regulated
Sus_scrofa___DPT	-4.13844	3.37867	21.1341	7.35425e-05	0.00639307	3	7	Down-regulated
Sus_scrofa___PRKCG	-3.15472	4.04688	21.5955	7.47112e-05	0.00643368	3	7	Down-regulated
Sus_scrofa___SLC28A3	-2.00735	2.28287	21.5951	7.50874e-05	0.00643764	3	7	Down-regulated
Sus_scrofa___KANK2	-1.32431	6.77088	21.5754	7.81736e-05	0.00663386	3	7	Down-regulated
Sus_scrofa___BARD1	-1.17173	5.49249	21.5447	7.88971e-05	0.00667256	3	7	Down-regulated
Sus_scrofa___ENSSSCG00000047384	-5.10363	1.81439	21.3123	8.13834e-05	0.00685958	3	7	Down-regulated
Sus_scrofa___TPGS2	-1.68008	5.30453	21.4237	8.17582e-05	0.00686797	3	7	Down-regulated
Sus_scrofa___AASS	-2.9737	5.5426	20.9879	9.2924e-05	0.00760118	3	7	Down-regulated
Sus_scrofa___PIK3C2G	-1.85482	2.81635	20.9132	9.35939e-05	0.0076054	3	7	Down-regulated
Sus_scrofa___DLG2	-1.65217	5.87338	20.9305	9.43881e-05	0.0076054	3	7	Down-regulated
Sus_scrofa___KCND3	-1.97288	5.51686	20.931	9.45516e-05	0.0076054	3	7	Down-regulated
Sus_scrofa___CPXM2	-2.61303	3.61596	20.8855	9.48487e-05	0.0076054	3	7	Down-regulated
Sus_scrofa___SLC25A35	-3.75423	0.855179	20.1116	9.51094e-05	0.0076054	3	7	Down-regulated
Sus_scrofa___MAML3	-1.6476	7.40705	20.8515	9.65803e-05	0.00767501	3	7	Down-regulated
Sus_scrofa___ENSSSCG00000043683	-1.96494	7.39416	20.8208	9.74603e-05	0.00771917	3	7	Down-regulated
Sus_scrofa___MRAS	-1.49321	7.59706	20.7845	9.85069e-05	0.00775283	3	7	Down-regulated
Sus_scrofa___ENSSSCG00000044453	-2.97752	3.52309	20.7148	9.92561e-05	0.00778723	3	7	Down-regulated
Sus_scrofa___PXYLP1	-1.63769	6.69911	20.6641	0.000102082	0.00795887	3	7	Down-regulated
Sus_scrofa___ENSSSCG00000048357	-2.78852	3.50684	20.5914	0.00010313	0.00801557	3	7	Down-regulated
Sus_scrofa___ENSSSCG00000048829	-5.67308	0.587929	20.3354	0.000104679	0.00808555	3	7	Down-regulated
Sus_scrofa___ZDHHC8	-2.07235	3.22357	20.4895	0.000106593	0.00815764	3	7	Down-regulated
Sus_scrofa___ENSSSCG00000044732	-3.71006	1.8843	19.9368	0.000109628	0.00826316	3	7	Down-regulated
Sus_scrofa___INSC	-1.94885	3.72162	20.4116	0.000110294	0.00828834	3	7	Down-regulated
Sus_scrofa___FGF1	-1.29409	8.10933	20.3493	0.000112072	0.0083721	3	7	Down-regulated
Sus_scrofa___ATP10D	-2.2283	5.44931	20.3543	0.00011208	0.0083721	3	7	Down-regulated
Sus_scrofa___TSPAN11	-2.5403	2.19323	19.7721	0.000114229	0.00848954	3	7	Down-regulated
Sus_scrofa___ESRRG	-1.07675	9.33451	20.2823	0.000114333	0.00848954	3	7	Down-regulated
Sus_scrofa___ENSSSCG00000048533	-3.06461	1.92209	19.8638	0.000114689	0.00849074	3	7	Down-regulated
Sus_scrofa___TTC7A	-1.63334	4.70324	20.0258	0.00012386	0.00887981	3	7	Down-regulated
Sus_scrofa___RGS7BP	-1.50295	6.08413	19.9388	0.000126756	0.00903553	3	7	Down-regulated
Sus_scrofa___ENSSSCG00000010310	-1.31414	3.5542	19.6501	0.000139008	0.00968749	3	7	Down-regulated
Sus_scrofa___COQ8A	-1.23237	7.86757	19.6019	0.000140297	0.00972301	3	7	Down-regulated
Sus_scrofa___FER1L6	-1.70268	5.15511	19.5225	0.000143813	0.00984759	3	7	Down-regulated
Sus_scrofa___ENSSSCG00000047860	-1.42448	4.74645	19.518	0.000144084	0.00984759	3	7	Down-regulated
Sus_scrofa___B3GALT2	-2.33679	4.6564	19.5079	0.000144863	0.00984759	3	7	Down-regulated
Sus_scrofa___ENSSSCG00000050585	-2.36881	3.35587	19.4452	0.000144879	0.00984759	3	7	Down-regulated
Sus_scrofa___ENSSSCG00000012049	-2.452	5.41099	19.4307	0.000147979	0.00997822	3	7	Down-regulated
Sus_scrofa___ENSSSCG00000036306	-3.74429	2.89901	18.4875	0.000151518	0.0101619	3	7	Down-regulated
Sus_scrofa___CDH18	-2.78023	5.21922	19.3456	0.00015199	0.0101662	3	7	Down-regulated
Sus_scrofa___CACNA1D	-1.33591	4.99862	19.251	0.000156247	0.0103676	3	7	Down-regulated
Sus_scrofa___ENSSSCG00000044774	-3.7377	3.30871	18.8898	0.000158124	0.0104495	3	7	Down-regulated
Sus_scrofa___HLTF	-1.19533	6.12471	19.2055	0.00015832	0.0104495	3	7	Down-regulated
Sus_scrofa___VWF	-1.50479	5.5766	19.1979	0.000158743	0.0104498	3	7	Down-regulated
Sus_scrofa___FLRT1	-2.40872	3.39812	19.1141	0.000160665	0.010532	3	7	Down-regulated
Sus_scrofa___ALAS2	-3.9639	0.659481	18.4074	0.000162174	0.0105478	3	7	Down-regulated
Sus_scrofa___MYBPC3	-1.22318	11.2506	19.1219	0.000162402	0.0105478	3	7	Down-regulated
Sus_scrofa___ENSSSCG00000042409	-1.97466	2.03439	18.9937	0.000162712	0.0105478	3	7	Down-regulated
Sus_scrofa___ENSSSCG00000032383	-2.11958	5.98883	19.116	0.000162768	0.0105478	3	7	Down-regulated
Sus_scrofa___SLC51A	-2.79422	1.50927	18.6062	0.000165647	0.0106832	3	7	Down-regulated
Sus_scrofa___ENSSSCG00000045412	-2.80613	4.317	18.9571	0.000171195	0.0108681	3	7	Down-regulated
Sus_scrofa___ZNF232	-2.34272	2.79559	18.7255	0.000180692	0.0114277	3	7	Down-regulated
Sus_scrofa___ASPN	-1.73329	5.22445	18.7737	0.000180927	0.0114277	3	7	Down-regulated
Sus_scrofa___PRKAG3	-2.30698	3.97127	18.753	0.00018252	0.0114992	3	7	Down-regulated
Sus_scrofa___TPM2	-1.65139	9.71168	18.631	0.00018895	0.0117905	3	7	Down-regulated
Sus_scrofa___ENSSSCG00000040109	-1.30133	10.2915	18.6296	0.000189033	0.0117905	3	7	Down-regulated
Sus_scrofa___ENSSSCG00000043205	-2.97573	2.44649	18.4776	0.000190059	0.0118249	3	7	Down-regulated
Sus_scrofa___TXNDC16	-1.25494	7.02533	18.5385	0.000194464	0.0119077	3	7	Down-regulated
Sus_scrofa___ENSSSCG00000049978	-4.096	1.51581	18.0754	0.000194731	0.0119077	3	7	Down-regulated
Sus_scrofa___PLA2G4A	-1.59338	5.61641	18.4215	0.000201787	0.012279	3	7	Down-regulated
Sus_scrofa___MYH6	-3.2127	9.62391	18.4039	0.000202783	0.0123096	3	7	Down-regulated
Sus_scrofa___GAS2L3	-2.64015	2.37472	18.2137	0.000203697	0.0123351	3	7	Down-regulated
Sus_scrofa___RPL22	-1.34403	6.57354	18.3219	0.000208062	0.0125354	3	7	Down-regulated
Sus_scrofa___SEMA3C	-1.32042	8.37926	18.3145	0.000208522	0.0125354	3	7	Down-regulated
Sus_scrofa___GFRA1	-2.63452	2.15825	18.0478	0.000209016	0.0125354	3	7	Down-regulated
Sus_scrofa___CLASP2	-0.877578	7.32315	18.2346	0.000213807	0.0126474	3	7	Down-regulated
Sus_scrofa___STRIP2	-1.20763	6.27779	18.2333	0.000213924	0.0126474	3	7	Down-regulated
Sus_scrofa___HSD17B10	-2.41466	1.56533	17.8167	0.000217559	0.0128319	3	7	Down-regulated
Sus_scrofa___LRCH2	-1.55138	4.77235	18.0937	0.000223698	0.0131628	3	7	Down-regulated
Sus_scrofa___PDE4A	-1.41986	5.17567	18.0479	0.000226855	0.0132859	3	7	Down-regulated
Sus_scrofa___ENSSSCG00000035617	-1.64757	5.95281	18.0183	0.000228959	0.0133777	3	7	Down-regulated
Sus_scrofa___ENSSSCG00000039961	-4.57724	1.22626	17.3046	0.000229967	0.0133837	3	7	Down-regulated
Sus_scrofa___ENSSSCG00000033328	-3.73643	1.43542	17.5082	0.000230133	0.0133837	3	7	Down-regulated
Sus_scrofa___CD302	-2.20858	2.87698	17.9253	0.000233679	0.0134674	3	7	Down-regulated
Sus_scrofa___ENSSSCG00000047958	-5.81709	0.546113	17.4533	0.000233732	0.0134674	3	7	Down-regulated
Sus_scrofa___ADH1C	-2.68012	3.16316	17.8579	0.000237222	0.0136056	3	7	Down-regulated
Sus_scrofa___ADAMTS18	-1.78989	4.4589	17.901	0.000237913	0.013614	3	7	Down-regulated
Sus_scrofa___CFTR	-1.75248	5.72871	17.8841	0.000238809	0.013634	3	7	Down-regulated
Sus_scrofa___ENSSSCG00000046704	-2.42195	4.17689	17.8364	0.000242715	0.0137313	3	7	Down-regulated
Sus_scrofa___ENSSSCG00000014368	-2.19648	1.76463	17.4431	0.000244916	0.0138244	3	7	Down-regulated
Sus_scrofa___CCR9	-2.15397	2.03361	17.6326	0.000247857	0.0139233	3	7	Down-regulated
Sus_scrofa___ENSSSCG00000049221	-2.28662	1.89101	17.5809	0.000248341	0.0139233	3	7	Down-regulated
Sus_scrofa___COBLL1	-1.41967	6.11808	17.6395	0.000257989	0.0142718	3	7	Down-regulated
Sus_scrofa___MYLIP	-1.59753	4.83301	17.6236	0.000259582	0.0142902	3	7	Down-regulated
Sus_scrofa___KCNRG	-2.387	2.19144	17.3377	0.0002731	0.01478	3	7	Down-regulated
Sus_scrofa___OBSL1	-1.19739	5.28433	17.4391	0.00027509	0.0148347	3	7	Down-regulated
Sus_scrofa___FAM160A2	-1.34079	4.20395	17.4242	0.000276764	0.0148495	3	7	Down-regulated
Sus_scrofa___ENSSSCG00000049359	-3.73133	0.531618	16.7275	0.000280092	0.0149636	3	7	Down-regulated
Sus_scrofa___RIPOR3	-1.83296	2.85107	17.295	0.000284537	0.0151363	3	7	Down-regulated
Sus_scrofa___ENSSSCG00000006213	-1.51223	5.11061	17.2373	0.000293572	0.0154958	3	7	Down-regulated
Sus_scrofa___ENSSSCG00000044559	-5.40629	-0.0525436	16.3606	0.000297799	0.0155013	3	7	Down-regulated
Sus_scrofa___TBX5	-1.30477	6.8887	17.0758	0.000308971	0.0159597	3	7	Down-regulated
Sus_scrofa___TINAG	-4.03021	4.17525	16.8588	0.000313411	0.0161223	3	7	Down-regulated
Sus_scrofa___SOX10	-1.9931	4.53014	16.9766	0.00031959	0.016339	3	7	Down-regulated
Sus_scrofa___ENSSSCG00000035477	-2.16812	3.36902	16.9444	0.000321411	0.0163985	3	7	Down-regulated
Sus_scrofa___CLRN1	-3.08589	0.912228	16.2984	0.000330105	0.0166716	3	7	Down-regulated
Sus_scrofa___ITGA1	-2.56224	3.75169	16.7659	0.000342758	0.0169916	3	7	Down-regulated
Sus_scrofa___ENSSSCG00000018046	-1.66965	4.04628	16.7571	0.000343404	0.0169916	3	7	Down-regulated
Sus_scrofa___RUFY1	-0.8809	7.08017	16.7397	0.000344477	0.0169916	3	7	Down-regulated
Sus_scrofa___ENPEP	-3.58812	4.3309	16.7131	0.000345351	0.0169916	3	7	Down-regulated
Sus_scrofa___OXTR	-2.34876	3.7058	16.727	0.000345976	0.0169916	3	7	Down-regulated
Sus_scrofa___ALDH2	-2.08907	2.61729	16.6685	0.000346902	0.0170037	3	7	Down-regulated
Sus_scrofa___ENSSSCG00000047842	-5.22091	-0.172351	15.5716	0.000354082	0.0172849	3	7	Down-regulated
Sus_scrofa___PDLIM7	-1.36424	6.95362	16.6523	0.000354425	0.0172849	3	7	Down-regulated
Sus_scrofa___AUTS2	-1.30918	8.5893	16.6377	0.000356103	0.0172849	3	7	Down-regulated
Sus_scrofa___SMC1B	-2.69765	5.38109	16.6286	0.000357581	0.0173156	3	7	Down-regulated
Sus_scrofa___CFAP43	-2.7593	1.89863	16.337	0.000364395	0.0175508	3	7	Down-regulated
Sus_scrofa___PTN	-2.54306	2.3044	16.4019	0.000368679	0.0177229	3	7	Down-regulated
Sus_scrofa___TRPC4	-1.73562	3.99707	16.5284	0.000370316	0.0177421	3	7	Down-regulated
Sus_scrofa___ASPDH	-1.77051	11.0379	16.4304	0.000381052	0.0181253	3	7	Down-regulated
Sus_scrofa___LRFN2	-2.06601	6.69434	16.3974	0.000385245	0.0181565	3	7	Down-regulated
Sus_scrofa___LRRTM3	-2.19937	9.66625	16.3886	0.000386309	0.0181565	3	7	Down-regulated
Sus_scrofa___PPFIBP2	-1.14019	7.2776	16.3642	0.000389439	0.0182149	3	7	Down-regulated
Sus_scrofa___SMCO1	-4.20177	1.28936	15.6868	0.000390005	0.0182149	3	7	Down-regulated
Sus_scrofa___CEP85	-0.978905	6.91264	16.3558	0.000390517	0.0182149	3	7	Down-regulated
Sus_scrofa___ENSSSCG00000038786	-2.5138	2.55145	16.3144	0.000390708	0.0182149	3	7	Down-regulated
Sus_scrofa___SLC24A4	-1.12589	4.56742	16.2826	0.000400471	0.0184777	3	7	Down-regulated
Sus_scrofa___ENSSSCG00000041248	-2.0971	2.03668	16.1389	0.000401908	0.0184777	3	7	Down-regulated
Sus_scrofa___ITPRID1	-2.22456	3.46892	16.234	0.000404431	0.0185311	3	7	Down-regulated
Sus_scrofa___SLC2A4RG	-2.05253	2.82149	16.1762	0.0004051	0.0185311	3	7	Down-regulated
Sus_scrofa___SRF	-1.2702	4.41883	16.2244	0.000408264	0.0186212	3	7	Down-regulated
Sus_scrofa___FIGN	-1.20606	6.56894	16.2002	0.000411028	0.018679	3	7	Down-regulated
Sus_scrofa___ENSSSCG00000047749	-1.05602	5.15051	16.187	0.000412957	0.0186981	3	7	Down-regulated
Sus_scrofa___SLC66A2	-1.15742	6.09948	16.1777	0.000414117	0.0186981	3	7	Down-regulated
Sus_scrofa___RIOX2	-1.70318	5.21497	16.1765	0.000414447	0.0186981	3	7	Down-regulated
Papio_anubis_PTPN4	-3.26647	1.49533	15.6234	0.000417597	0.0187723	3	7	Down-regulated
Sus_scrofa___ENSSSCG00000011676	-1.42153	6.51632	16.1162	0.00042258	0.0189281	3	7	Down-regulated
Sus_scrofa___NAALADL2	-1.2864	7.36072	16.1009	0.000424703	0.0189594	3	7	Down-regulated
Sus_scrofa___USP35	-1.66831	2.35863	16.0166	0.000431998	0.019212	3	7	Down-regulated
Sus_scrofa___ENSSSCG00000042694	-2.28635	4.9119	16.037	0.00043455	0.0192911	3	7	Down-regulated
Sus_scrofa___TRDN	-1.60401	9.8857	15.9392	0.000448055	0.0198201	3	7	Down-regulated
Sus_scrofa___PHF19	-1.83482	3.88989	15.9279	0.00045152	0.0198861	3	7	Down-regulated
Sus_scrofa___FCGR1A	-2.05974	3.17885	15.8707	0.000457981	0.0200785	3	7	Down-regulated
Sus_scrofa___ENSSSCG00000037140	-1.87398	5.14165	15.8675	0.000459245	0.0200785	3	7	Down-regulated
Sus_scrofa___DOCK3	-1.09315	8.93464	15.8611	0.000459834	0.0200785	3	7	Down-regulated
Sus_scrofa___FSD2	-1.81334	6.85719	15.8088	0.000467946	0.0203393	3	7	Down-regulated
Sus_scrofa___MICALL1	-1.68093	6.41938	15.7743	0.000473357	0.0204675	3	7	Down-regulated
Sus_scrofa___GPR137C	-1.40953	7.84554	15.7037	0.000484595	0.0207378	3	7	Down-regulated
Sus_scrofa___KLHL23	-1.17954	5.18178	15.6796	0.000488711	0.0208425	3	7	Down-regulated
Sus_scrofa___CYP2C42	-1.48146	4.269	15.6471	0.000494712	0.0210624	3	7	Down-regulated
Sus_scrofa___TLCD3B	-2.4699	2.85374	15.5324	0.00049643	0.0210995	3	7	Down-regulated
Papio_anubis_SF3B1	-1.89216	4.01945	15.4352	0.000532179	0.022355	3	7	Down-regulated
Sus_scrofa___FAM151A	-3.31083	3.28597	15.3186	0.000532822	0.022355	3	7	Down-regulated
Sus_scrofa___ENSSSCG00000051591	-3.19244	4.78998	15.3651	0.00053847	0.0225372	3	7	Down-regulated
Sus_scrofa___LRRC39	-2.39803	6.93885	15.3779	0.00054058	0.0225446	3	7	Down-regulated
Sus_scrofa___RYR2	-0.915707	13.7694	15.3707	0.000541866	0.0225446	3	7	Down-regulated
Sus_scrofa___ENSSSCG00000042614	-2.13782	2.2128	15.2414	0.000545716	0.0225789	3	7	Down-regulated
Sus_scrofa___TENM2	-2.13317	10.1833	15.296	0.00055568	0.0228396	3	7	Down-regulated
Sus_scrofa___MYOM1	-0.929413	9.86293	15.2589	0.000562679	0.0230126	3	7	Down-regulated
Sus_scrofa___CDC20B	-2.3446	3.30272	15.2431	0.000564491	0.0230126	3	7	Down-regulated
Sus_scrofa___LSR	-2.09905	2.36519	15.1335	0.00057386	0.0231398	3	7	Down-regulated
Sus_scrofa___CES5A	-2.62447	1.6529	14.8977	0.000574986	0.0231398	3	7	Down-regulated
Sus_scrofa___ATOH8	-2.17381	3.98672	15.2022	0.000575149	0.0231398	3	7	Down-regulated
Sus_scrofa___FCGRT	-1.18758	3.77129	15.1989	0.000575838	0.0231398	3	7	Down-regulated
Sus_scrofa___CPNE3	-0.992261	9.13014	15.1852	0.000576896	0.0231398	3	7	Down-regulated
Sus_scrofa___HCLS1	-1.89031	6.93901	15.1679	0.000580328	0.0231869	3	7	Down-regulated
Sus_scrofa___PLCB4	-1.04174	8.76749	15.1514	0.000583526	0.0231869	3	7	Down-regulated
Sus_scrofa___ENSSSCG00000001441	-5.4644	0.160841	14.461	0.000584206	0.0231869	3	7	Down-regulated
Sus_scrofa___SRARP	-3.25095	0.399863	14.2212	0.000586977	0.0232084	3	7	Down-regulated
Sus_scrofa___OCIAD2	-1.75759	5.88329	15.1144	0.000591028	0.0233316	3	7	Down-regulated
Sus_scrofa___SYCP3	-3.28007	1.59024	14.8251	0.000598687	0.0234679	3	7	Down-regulated
Sus_scrofa___EFEMP1	-1.84637	4.26896	14.988	0.000618208	0.023802	3	7	Down-regulated
Sus_scrofa___ENSSSCG00000047293	-2.27336	0.958822	14.6602	0.000623611	0.0238896	3	7	Down-regulated
Sus_scrofa___ENSSSCG00000046959	-4.32284	2.00593	14.5409	0.00062977	0.0240214	3	7	Down-regulated
Sus_scrofa___RXFP4	-2.92395	2.45546	14.723	0.000630646	0.0240214	3	7	Down-regulated
Sus_scrofa___RXRG	-2.00692	5.57457	14.9129	0.000633672	0.0240631	3	7	Down-regulated
Sus_scrofa___HIPK3	-0.839752	8.60204	14.8779	0.000640412	0.0242453	3	7	Down-regulated
Sus_scrofa___ENSSSCG00000015747	-2.45075	10.0303	14.8498	0.000646605	0.0244426	3	7	Down-regulated
Sus_scrofa___AMIGO1	-1.85197	2.35477	14.7483	0.000649452	0.0245131	3	7	Down-regulated
Sus_scrofa___ARMC2	-1.47643	7.4076	14.8242	0.00065228	0.0245716	3	7	Down-regulated
Sus_scrofa___PDHA1	-0.92326	6.27898	14.8213	0.00065297	0.0245716	3	7	Down-regulated
Sus_scrofa___ENSSSCG00000033787	-2.30391	1.16022	14.4262	0.000655789	0.0246034	3	7	Down-regulated
Sus_scrofa___RAB20	-1.47346	5.88753	14.7724	0.000664095	0.0248031	3	7	Down-regulated
Sus_scrofa___ZNF483	-2.34643	3.66297	14.749	0.000666005	0.0248373	3	7	Down-regulated
Sus_scrofa___ENSSSCG00000010074	-4.61868	-0.281449	13.6905	0.000668306	0.0248859	3	7	Down-regulated
Sus_scrofa___IL17B	-1.03159	8.12723	14.748	0.000669511	0.0248936	3	7	Down-regulated
Sus_scrofa___TP63	-2.55154	4.59955	14.7016	0.000682562	0.0252285	3	7	Down-regulated
Sus_scrofa___TMEM53	-1.69609	3.45237	14.6233	0.000701012	0.0257958	3	7	Down-regulated
Sus_scrofa___KIF21A	-0.833849	6.23089	14.5499	0.000716708	0.0261803	3	7	Down-regulated
Sus_scrofa___IRS1	-1.20649	6.22926	14.454	0.000740819	0.0269427	3	7	Down-regulated
Sus_scrofa___TLN2	-1.04695	9.16986	14.4433	0.000743506	0.0269673	3	7	Down-regulated
Sus_scrofa___MAPRE2	-1.65193	8.20831	14.4408	0.000744141	0.0269673	3	7	Down-regulated
Sus_scrofa___CAST	-0.945313	9.17618	14.4321	0.000746368	0.0269673	3	7	Down-regulated
Sus_scrofa___ENSSSCG00000051705	-2.34962	3.65541	14.4309	0.000746901	0.0269673	3	7	Down-regulated
Sus_scrofa___CEP126	-1.02267	7.50568	14.4107	0.000751919	0.0271093	3	7	Down-regulated
Sus_scrofa___DHRS7C	-3.34322	3.39764	14.2204	0.000764175	0.0275114	3	7	Down-regulated
Sus_scrofa___TSHR	-1.32861	2.22941	14.355	0.000765568	0.0275218	3	7	Down-regulated
Sus_scrofa___ACSBG1	-2.03441	2.05095	14.2427	0.00077741	0.0278672	3	7	Down-regulated
Sus_scrofa___YPEL3	-1.76497	2.44492	14.2532	0.000787176	0.0279762	3	7	Down-regulated
Sus_scrofa___ENSSSCG00000049081	-2.9473	1.18444	13.685	0.000819976	0.0288541	3	7	Down-regulated
Sus_scrofa___PARM1	-1.26803	8.30574	14.1519	0.000822567	0.0288775	3	7	Down-regulated
Sus_scrofa___GPR139	-2.32284	2.90877	14.0917	0.000827839	0.0289607	3	7	Down-regulated
Sus_scrofa___CMYA5	-1.73302	5.00405	14.0806	0.000844692	0.0293513	3	7	Down-regulated
Sus_scrofa___THRB	-0.921557	10.116	14.0711	0.000846087	0.0293589	3	7	Down-regulated
Sus_scrofa___PACC1	-1.17558	5.48095	14.0657	0.000847914	0.0293814	3	7	Down-regulated
Sus_scrofa___LMOD1	-1.77122	2.93381	14.0597	0.000849213	0.0293856	3	7	Down-regulated
Sus_scrofa___ENSSSCG00000035215	-2.63833	0.660112	13.6228	0.000852914	0.0294728	3	7	Down-regulated
Sus_scrofa___MTARC2	-1.0316	7.28772	14.0432	0.000854382	0.0294827	3	7	Down-regulated
Sus_scrofa___IQCG	-1.83865	5.27187	14.0369	0.000856679	0.0295211	3	7	Down-regulated
Sus_scrofa___PTPN4	-0.793639	9.25616	13.9868	0.000871353	0.0298618	3	7	Down-regulated
Sus_scrofa___TLE2	-1.31103	4.60137	13.9741	0.000876075	0.0299413	3	7	Down-regulated
Sus_scrofa___ENPP1	-1.52211	7.00117	13.9525	0.000881944	0.0301007	3	7	Down-regulated
Sus_scrofa___CYSLTR1	-1.60442	3.58677	13.9218	0.000893622	0.0303746	3	7	Down-regulated
Sus_scrofa___CUX2	-2.49238	6.25047	13.858	0.000911778	0.0307598	3	7	Down-regulated
Sus_scrofa___TIMM44	-1.00353	5.19816	13.8131	0.000926408	0.0310658	3	7	Down-regulated
Sus_scrofa___PANK4	-1.65899	4.7263	13.7915	0.0009344	0.0312917	3	7	Down-regulated
Sus_scrofa___UQCRQ	-1.35991	6.59836	13.7804	0.000936876	0.0313035	3	7	Down-regulated
Sus_scrofa___STAP2	-4.33254	-0.130773	12.8944	0.000937261	0.0313035	3	7	Down-regulated
Sus_scrofa___ENSSSCG00000034352	-2.66583	3.42269	13.7456	0.000941721	0.0313944	3	7	Down-regulated
Sus_scrofa___ENSSSCG00000043232	-4.55399	1.48784	13.6168	0.000967793	0.0318963	3	7	Down-regulated
Sus_scrofa___ENSSSCG00000032625	-3.11691	0.527703	13.109	0.000976602	0.0320777	3	7	Down-regulated
Sus_scrofa___MSRB2	-0.980085	5.27411	13.6578	0.000978471	0.0320787	3	7	Down-regulated
Sus_scrofa___ENSSSCG00000040897	-1.87376	2.59443	13.5732	0.000999342	0.0326771	3	7	Down-regulated
Sus_scrofa___SLC25A29	-1.22805	7.06609	13.4906	0.00103784	0.0336272	3	7	Down-regulated
Sus_scrofa___EPHA1	-3.05496	1.05832	13.1509	0.00103924	0.0336291	3	7	Down-regulated
Sus_scrofa___STON2	-1.87087	4.45353	13.4622	0.00104992	0.0338218	3	7	Down-regulated
Sus_scrofa___HACD1	-1.51495	7.25676	13.4403	0.00105654	0.0339458	3	7	Down-regulated
Sus_scrofa___PDGFD	-2.16886	6.59538	13.3744	0.00108181	0.0343927	3	7	Down-regulated
Sus_scrofa___SRSF5	-0.835068	7.53936	13.373	0.00108214	0.0343927	3	7	Down-regulated
Sus_scrofa___DNAH11	-1.39557	3.29802	13.3648	0.00108944	0.0344491	3	7	Down-regulated
Sus_scrofa___NSUN7	-1.68396	2.09449	13.2924	0.00110243	0.0347396	3	7	Down-regulated
Sus_scrofa___TRPC7	-1.30405	2.21314	13.3148	0.00110779	0.0348088	3	7	Down-regulated
Sus_scrofa___ZRANB2	-0.718703	8.57036	13.2491	0.00113101	0.0353889	3	7	Down-regulated
Sus_scrofa___CNGA3	-2.69725	1.12067	12.8674	0.00113192	0.0353889	3	7	Down-regulated
Sus_scrofa___ENSSSCG00000043152	-2.10185	1.63445	13.0855	0.00114124	0.035458	3	7	Down-regulated
Sus_scrofa___FKBP1B	-1.58256	2.53062	13.2241	0.00114724	0.0355269	3	7	Down-regulated
Sus_scrofa___PON1	-2.17664	4.44412	13.2133	0.00114773	0.0355269	3	7	Down-regulated
Sus_scrofa___SNRNP70	-0.775837	8.87899	13.1811	0.00115887	0.0358272	3	7	Down-regulated
Sus_scrofa___PLEK	-1.13931	3.22394	13.1749	0.00116529	0.0359812	3	7	Down-regulated
Sus_scrofa___LRRC9	-2.03869	6.07542	13.1189	0.00118526	0.0364176	3	7	Down-regulated
Sus_scrofa___B3GNT8	-2.30792	2.47256	12.9684	0.00119196	0.0365672	3	7	Down-regulated
Sus_scrofa___EYA4	-2.52715	5.34618	13.096	0.00119622	0.0365743	3	7	Down-regulated
Sus_scrofa___ELP1	-0.879345	5.61293	13.0831	0.00120051	0.0366513	3	7	Down-regulated
Sus_scrofa___SLC41A3	-1.24122	3.99456	13.0844	0.00120168	0.0366513	3	7	Down-regulated
Sus_scrofa___PSD3	-1.34608	7.625	13.06	0.00121032	0.0368248	3	7	Down-regulated
Sus_scrofa___ENSSSCG00000043295	-3.91369	0.36677	12.4652	0.00123093	0.0372249	3	7	Down-regulated
Sus_scrofa___TVP23A	-1.82935	3.28933	13.0134	0.00123488	0.0372541	3	7	Down-regulated
Sus_scrofa___PRRX1	-3.79197	2.90343	12.7959	0.00124058	0.0372949	3	7	Down-regulated
Sus_scrofa___ENSSSCG00000009667	-1.74646	2.05961	12.8684	0.00124065	0.0372949	3	7	Down-regulated
Sus_scrofa___AKAP3	-1.15797	5.38817	12.9916	0.00124072	0.0372949	3	7	Down-regulated
Sus_scrofa___CROCC2	-1.77271	3.75257	12.9793	0.00125101	0.0375138	3	7	Down-regulated
Sus_scrofa___GRAMD1C	-1.15862	6.03154	12.9582	0.00125573	0.0375774	3	7	Down-regulated
Sus_scrofa___UPK3A	-4.61632	0.175253	12.4527	0.00125615	0.0375774	3	7	Down-regulated
Sus_scrofa___ENSSSCG00000042387	-2.51293	1.13306	12.6891	0.00125936	0.0375834	3	7	Down-regulated
Sus_scrofa___CDCA7L	-1.39223	6.12351	12.9227	0.00127176	0.0379075	3	7	Down-regulated
Sus_scrofa___PAQR9	-1.32581	4.36774	12.924	0.00127326	0.0379075	3	7	Down-regulated
Sus_scrofa___ENSSSCG00000050005	-3.78002	1.06605	12.4475	0.00128439	0.0381389	3	7	Down-regulated
Sus_scrofa___ADCYAP1R1	-1.4534	5.38716	12.8932	0.00128561	0.0381389	3	7	Down-regulated
Sus_scrofa___ENSSSCG00000044896	-2.63697	3.36864	12.851	0.00129516	0.0383764	3	7	Down-regulated
Sus_scrofa___GGCX	-1.80555	6.56642	12.8206	0.00131948	0.0388655	3	7	Down-regulated
Sus_scrofa___OAZ3	-3.42219	1.74415	12.3131	0.00132769	0.039016	3	7	Down-regulated
Sus_scrofa___ENSSSCG00000013530	-1.97468	3.87382	12.7907	0.001336	0.0391678	3	7	Down-regulated
Sus_scrofa___ENSSSCG00000011344	-2.6284	1.01857	12.5406	0.00133918	0.0391687	3	7	Down-regulated
Sus_scrofa___FBLIM1	-1.2613	6.18407	12.7721	0.00134285	0.0391687	3	7	Down-regulated
Sus_scrofa___SPINK8	-1.8892	5.03872	12.7653	0.0013469	0.0391687	3	7	Down-regulated
Sus_scrofa___HNRNPA2B1	-0.816004	7.92604	12.7634	0.00134702	0.0391687	3	7	Down-regulated
Sus_scrofa___SRRT	-0.758139	5.81415	12.7586	0.00134946	0.0391941	3	7	Down-regulated
Sus_scrofa___CCDC28B	-2.54399	1.65176	12.5785	0.00136223	0.0394183	3	7	Down-regulated
Sus_scrofa___CAMTA2	-0.91108	6.0565	12.7269	0.00136508	0.0394183	3	7	Down-regulated
Sus_scrofa___ENSSSCG00000046137	-3.29585	0.373178	12.2576	0.00137067	0.0394427	3	7	Down-regulated
Sus_scrofa___ALX4	-3.55998	0.506768	12.3085	0.00137235	0.0394457	3	7	Down-regulated
Sus_scrofa___TNS3	-1.77396	4.84612	12.7026	0.00137846	0.0395757	3	7	Down-regulated
Sus_scrofa___ENSSSCG00000013434	-6.16921	0.702959	12.7245	0.00139734	0.0397971	3	7	Down-regulated
Sus_scrofa___LMO7	-1.17522	9.55048	12.5724	0.00144382	0.0409284	3	7	Down-regulated
Sus_scrofa___ENSSSCG00000041499	-2.88818	4.33159	12.5412	0.00144816	0.0409284	3	7	Down-regulated
Sus_scrofa___GRM7	-1.37338	2.98291	12.5729	0.00144847	0.0409284	3	7	Down-regulated
Sus_scrofa___ECI2	-0.822123	6.73522	12.5602	0.0014503	0.0409316	3	7	Down-regulated
Sus_scrofa___SPOUT1	-1.22716	3.34779	12.5581	0.00145581	0.0410407	3	7	Down-regulated
Sus_scrofa___ZBED1	-3.58189	0.207247	11.9354	0.00146119	0.0411459	3	7	Down-regulated
Sus_scrofa___GRIP2	-2.38391	5.46257	12.5299	0.00146735	0.0411923	3	7	Down-regulated
Sus_scrofa___NEBL	-0.853648	12.3387	12.5266	0.00146815	0.0411923	3	7	Down-regulated
Sus_scrofa___DDI1	-3.55793	1.89812	12.3761	0.00147572	0.0411923	3	7	Down-regulated
Sus_scrofa___CCBE1	-1.10603	8.50989	12.5099	0.00147711	0.0411923	3	7	Down-regulated
Sus_scrofa___MRTFB	-0.609758	8.44916	12.5075	0.00147838	0.0411923	3	7	Down-regulated
Sus_scrofa___TRIP6	-1.70991	2.40545	12.4863	0.00147935	0.0411923	3	7	Down-regulated
Sus_scrofa___BAIAP2L2	-1.51914	2.07122	12.4642	0.00148608	0.041212	3	7	Down-regulated
Sus_scrofa___GCNT2	-0.98976	8.24733	12.4918	0.00148692	0.041212	3	7	Down-regulated
Sus_scrofa___ENSSSCG00000050174	-3.06281	4.37521	12.4856	0.00148894	0.041212	3	7	Down-regulated
Sus_scrofa___ENSSSCG00000051776	-2.43552	1.98949	12.2548	0.00149063	0.041212	3	7	Down-regulated
Sus_scrofa___NASP	-0.902118	5.21346	12.4809	0.00149319	0.041212	3	7	Down-regulated
Sus_scrofa___PBX1	-1.15686	9.82058	12.4757	0.00149568	0.041212	3	7	Down-regulated
Sus_scrofa___ENSSSCG00000046452	-1.08219	6.01658	12.4557	0.00150681	0.0414252	3	7	Down-regulated
Sus_scrofa___ENSSSCG00000044044	-2.2949	1.29523	12.2272	0.00151099	0.0414252	3	7	Down-regulated
Sus_scrofa___TAL2	-4.34793	-0.353024	11.5189	0.00151196	0.0414252	3	7	Down-regulated
Sus_scrofa___PGM2L1	-1.05132	4.81421	12.4065	0.00153492	0.0418366	3	7	Down-regulated
Sus_scrofa___SLC18A2	-2.67794	0.890497	12.123	0.00154153	0.0418951	3	7	Down-regulated
Sus_scrofa___SOSTDC1	-5.06044	0.00339603	11.7319	0.00158194	0.0426406	3	7	Down-regulated
Sus_scrofa___SYNM	-1.08813	6.36099	12.3216	0.00158264	0.0426406	3	7	Down-regulated
Sus_scrofa___ENSSSCG00000031608	-1.19451	8.79717	12.3025	0.00159364	0.0428389	3	7	Down-regulated
Sus_scrofa___FAM166B	-3.43026	0.400705	11.8824	0.00159978	0.0428389	3	7	Down-regulated
Sus_scrofa___TRIM9	-1.8173	2.04592	12.2436	0.00160202	0.0428389	3	7	Down-regulated
Sus_scrofa___WNT2B	-1.38723	4.1907	12.2795	0.00160968	0.04297	3	7	Down-regulated
Sus_scrofa___KANK3	-3.43296	0.196468	11.5529	0.00161789	0.0430788	3	7	Down-regulated
Sus_scrofa___ENSSSCG00000049158	-1.08695	6.95273	12.2416	0.00162982	0.0433039	3	7	Down-regulated
Sus_scrofa___PEBP4	-1.78495	3.02243	12.2052	0.00164568	0.0436324	3	7	Down-regulated
Sus_scrofa___ENSSSCG00000042169	-1.02267	4.72031	12.2036	0.0016535	0.043741	3	7	Down-regulated
Sus_scrofa___ARHGEF6	-0.767471	8.23085	12.1906	0.00166067	0.043741	3	7	Down-regulated
Sus_scrofa___PRRG2	-1.12085	4.09961	12.1927	0.00166205	0.043741	3	7	Down-regulated
Sus_scrofa___NDUFB3	-0.819801	6.04372	12.1769	0.00166918	0.0438822	3	7	Down-regulated
Sus_scrofa___SMAD6	-1.41022	6.40906	12.1625	0.00167812	0.0439855	3	7	Down-regulated
Sus_scrofa___ASB15	-1.53502	8.01575	12.1539	0.00168333	0.0440545	3	7	Down-regulated
Sus_scrofa___NCF1	-2.13634	2.64837	12.0775	0.00172163	0.0447795	3	7	Down-regulated
Sus_scrofa___IRX1	-5.71092	0.000905232	11.3875	0.00172353	0.0447795	3	7	Down-regulated
Sus_scrofa___PLXNC1	-1.09094	3.89876	12.0883	0.00172719	0.0447852	3	7	Down-regulated
Sus_scrofa___UBXN6	-0.928534	4.45213	12.0604	0.00174399	0.0449957	3	7	Down-regulated
Sus_scrofa___STOX1	-1.52355	5.13433	12.0405	0.00175699	0.0452843	3	7	Down-regulated
Sus_scrofa___LNP1	-2.05541	3.36433	12.0216	0.00176322	0.0453512	3	7	Down-regulated
Sus_scrofa___ITGB1BP2	-1.28945	6.39135	11.9873	0.00179044	0.0459093	3	7	Down-regulated
Sus_scrofa___ENSSSCG00000043191	-2.97803	1.07408	11.8537	0.0018035	0.0461784	3	7	Down-regulated
Sus_scrofa___CLCN2	-1.86102	2.14263	11.9187	0.00180649	0.0461784	3	7	Down-regulated
Sus_scrofa___AMMECR1	-1.38709	7.25524	11.9598	0.00180867	0.0461867	3	7	Down-regulated
Sus_scrofa___ENSSSCG00000017734	-1.97987	1.55314	11.7774	0.00182844	0.0464989	3	7	Down-regulated
Sus_scrofa___CIBAR1	-1.20244	6.32584	11.9306	0.0018285	0.0464989	3	7	Down-regulated
Sus_scrofa___JDP2	-1.4938	4.24056	11.8946	0.00185578	0.0470033	3	7	Down-regulated
Sus_scrofa___ENSSSCG00000050791	-2.24581	3.06849	11.87	0.00186496	0.0470939	3	7	Down-regulated
Sus_scrofa___HS3ST5	-2.49388	6.0538	11.8744	0.00186771	0.0471018	3	7	Down-regulated
Sus_scrofa___PADI1	-4.08464	-0.391631	10.9973	0.0018771	0.0472093	3	7	Down-regulated
Sus_scrofa___HVCN1	-1.60781	4.25374	11.8576	0.00188196	0.0472839	3	7	Down-regulated
Sus_scrofa___TMEM178A	-2.01336	2.65523	11.8367	0.00188988	0.0473877	3	7	Down-regulated
Sus_scrofa___RPS6KB2	-0.998444	4.63086	11.7749	0.00193867	0.0482876	3	7	Down-regulated
Sus_scrofa___DDN	-2.99175	0.667612	11.3149	0.00193974	0.0482876	3	7	Down-regulated
Sus_scrofa___ENSSSCG00000049121	-2.41626	1.34455	11.5941	0.00194047	0.0482876	3	7	Down-regulated
Sus_scrofa___LXN	-2.14515	1.71163	11.65	0.00194854	0.0483022	3	7	Down-regulated
Sus_scrofa___WEE2	-1.69643	2.23704	11.726	0.001949	0.0483022	3	7	Down-regulated
Sus_scrofa___KRT23	-2.97954	0.518158	11.2814	0.00196479	0.0485823	3	7	Down-regulated
Sus_scrofa___TMEM71	-5.34162	1.22456	11.3597	0.00197671	0.0487804	3	7	Down-regulated
Sus_scrofa___FNDC1	-1.97937	4.66374	11.7037	0.00198894	0.0489852	3	7	Down-regulated
Sus_scrofa___ENSSSCG00000025271	-2.84256	1.19036	11.4321	0.0020014	0.0492381	3	7	Down-regulated
Sus_scrofa___GLS2	-1.59675	2.34081	11.6628	0.00200315	0.0492381	3	7	Down-regulated
Sus_scrofa___ENSSSCG00000042008	-2.65107	1.86975	11.5559	0.00201228	0.0493745	3	7	Down-regulated
Sus_scrofa___SLC9A5	-1.95283	2.22509	11.5656	0.00202426	0.0495616	3	7	Down-regulated
Sus_scrofa___SOAT1	-1.267	3.10113	11.6519	0.00203824	0.0497575	3	7	Down-regulated
Sus_scrofa___PRSS12	-2.17364	3.10712	11.641	0.00204133	0.0497586	3	7	Down-regulated

## Sheet: vFB_ISG
Gene	logFC	logCPM	F	PValue	FDR	Observations_PCMV/PRV	Observations_3month_protocol	level
Sus_scrofa___PAPPA	3.14692	9.19265	38.643	5.03419e-08	0.000351839	3	5	Up-regulated
Sus_scrofa___KANK1	7.01235	6.4942	36.3246	9.76627e-08	0.000455043	3	5	Up-regulated
Sus_scrofa___ENSSSCG00000016263	3.03808	8.11027	30.7479	6.32977e-07	0.00176955	3	5	Up-regulated
Sus_scrofa___CCND3	2.31793	10.0492	29.043	1.21899e-06	0.00254482	3	5	Up-regulated
Sus_scrofa___PTN	4.03744	6.78233	27.4559	1.67643e-06	0.00282192	3	5	Up-regulated
Sus_scrofa___LRRFIP1	2.60409	8.77644	27.8735	1.81695e-06	0.00282192	3	5	Up-regulated
Sus_scrofa___PTX3	3.91996	7.45998	26.7795	2.25046e-06	0.0031457	3	5	Up-regulated
Sus_scrofa___CRLF1	4.04118	6.73182	25.1082	3.81566e-06	0.00451877	3	5	Up-regulated
Sus_scrofa___RGS2	5.55004	6.74505	25.7343	3.87932e-06	0.00451877	3	5	Up-regulated
Sus_scrofa___PRICKLE2	2.10112	9.79073	25.1773	4.85562e-06	0.00522091	3	5	Up-regulated
Sus_scrofa___DDIT4	4.10569	7.24284	23.9844	6.5183e-06	0.00650806	3	5	Up-regulated
Sus_scrofa___DPYSL3	2.42867	8.18526	24.0554	7.2146e-06	0.00672305	3	5	Up-regulated
Sus_scrofa___ENSSSCG00000038187	2.59981	7.74138	23.6092	8.34281e-06	0.00707448	3	5	Up-regulated
Sus_scrofa___TPM1	3.04043	7.60276	23.2553	9.11007e-06	0.00707448	3	5	Up-regulated
Sus_scrofa___ADAMTS3	3.93549	7.00125	22.7959	9.96851e-06	0.00733367	3	5	Up-regulated
Sus_scrofa___ENSSSCG00000016629	2.5788	8.73202	22.8369	1.14949e-05	0.00793776	3	5	Up-regulated
Sus_scrofa___OSBPL11	3.07553	6.92989	22.2607	1.24275e-05	0.00793776	3	5	Up-regulated
Sus_scrofa___MGMT	2.33106	8.02625	21.1899	2.10298e-05	0.0117582	3	5	Up-regulated
Sus_scrofa___LAMB1	1.91434	9.53156	20.8234	2.50698e-05	0.0122769	3	5	Up-regulated
Sus_scrofa___SPOCK3	2.37966	7.60866	20.59	2.6164e-05	0.0122769	3	5	Up-regulated
Sus_scrofa___PI15	4.24246	7.41171	20.3511	2.64764e-05	0.0122769	3	5	Up-regulated
Sus_scrofa___STC2	3.59064	6.4383	20.1357	2.72273e-05	0.0122769	3	5	Up-regulated
Sus_scrofa___MYLK	3.74565	7.37462	19.9619	3.13885e-05	0.0133521	3	5	Up-regulated
Sus_scrofa___APP	1.97458	8.87918	20.2201	3.17415e-05	0.0133521	3	5	Up-regulated
Sus_scrofa___FBN2	2.42821	8.31436	20.1044	3.28625e-05	0.0133521	3	5	Up-regulated
Sus_scrofa___FKBP5	2.02994	9.91987	20.084	3.34327e-05	0.0133521	3	5	Up-regulated
Sus_scrofa___CCN4	6.43191	6.13621	20.0046	3.61125e-05	0.013725	3	5	Up-regulated
Sus_scrofa___FBXO21	2.46386	7.35746	19.7161	3.63303e-05	0.013725	3	5	Up-regulated
pCMV_____gp45	6.82749	6.11288	20.1991	3.85779e-05	0.0141906	3	5	Up-regulated
Sus_scrofa___IRS2	4.64632	6.31508	19.3998	3.99765e-05	0.0143158	3	5	Up-regulated
Sus_scrofa___LUM	2.33951	7.68146	19.4872	4.09667e-05	0.0143158	3	5	Up-regulated
Sus_scrofa___NMNAT2	3.28333	6.61342	18.9877	4.56971e-05	0.0155794	3	5	Up-regulated
Sus_scrofa___THSD4	2.4804	8.99619	19.0286	5.06263e-05	0.0168489	3	5	Up-regulated
Sus_scrofa___ENSSSCG00000024974	2.63928	7.44397	18.5439	5.76002e-05	0.0187241	3	5	Up-regulated
Sus_scrofa___TPK1	5.5606	6.09272	18.4303	6.51515e-05	0.0206156	3	5	Up-regulated
Sus_scrofa___SMAD7	2.64781	7.086	18.1371	6.63688e-05	0.0206156	3	5	Up-regulated
Sus_scrofa___ENSSSCG00000021200	2.07748	7.81904	18.2399	6.84573e-05	0.0208021	3	5	Up-regulated
Sus_scrofa___LCORL	3.22123	6.58435	17.8997	7.11019e-05	0.021146	3	5	Up-regulated
Sus_scrofa___ENSSSCG00000004387	1.91682	9.98573	18.0144	7.62489e-05	0.0217512	3	5	Up-regulated
Sus_scrofa___BMP6	1.87603	9.2956	17.9362	7.87962e-05	0.0220283	3	5	Up-regulated
Sus_scrofa___UBE2H	1.92611	8.7498	17.6967	8.6773e-05	0.0237826	3	5	Up-regulated
Sus_scrofa___AAK1	2.28488	7.90397	17.3682	9.72844e-05	0.0256574	3	5	Up-regulated
Sus_scrofa___VAV3	1.87883	8.6906	17.0357	0.000113724	0.0289025	3	5	Up-regulated
Sus_scrofa___METAP1D	5.46894	6.00977	16.8979	0.000119854	0.0299164	3	5	Up-regulated
Sus_scrofa___ENSSSCG00000002260	2.28268	7.82693	16.4904	0.000137	0.0324574	3	5	Up-regulated
Sus_scrofa___ROR2	2.33916	8.20005	16.3719	0.000146268	0.0340756	3	5	Up-regulated
Sus_scrofa___YPEL2	3.00253	7.0993	15.7991	0.000175673	0.0396058	3	5	Up-regulated
Sus_scrofa___PDE3B	2.55509	8.07154	15.7314	0.000191369	0.0424596	3	5	Up-regulated
Sus_scrofa___ENSSSCG00000049691	1.76978	8.93981	15.7188	0.000196308	0.042875	3	5	Up-regulated
Sus_scrofa___TMCC3	2.85287	6.53431	15.3727	0.000201305	0.042929	3	5	Up-regulated
Sus_scrofa___TIMP1	2.55808	7.02886	15.418	0.000207326	0.042929	3	5	Up-regulated
Sus_scrofa___ZBTB16	1.92239	10.8673	15.5854	0.000207442	0.042929	3	5	Up-regulated
Sus_scrofa___FIGN	2.47206	7.22062	15.4696	0.000208841	0.042929	3	5	Up-regulated
Sus_scrofa___GPC5	-4.54356	8.57337	41.3276	2.19619e-08	0.000306984	3	5	Down-regulated
Sus_scrofa___COL6A6	-3.15734	7.92163	32.1699	4.0628e-07	0.00141975	3	5	Down-regulated
Sus_scrofa___MITF	-2.87841	8.7389	28.9168	1.27441e-06	0.00254482	3	5	Down-regulated
Sus_scrofa___NRXN1	-4.43097	7.44061	23.3403	8.64287e-06	0.00707448	3	5	Down-regulated
Sus_scrofa___HMCN2	-3.21977	7.67154	22.4267	1.24932e-05	0.00793776	3	5	Down-regulated
Sus_scrofa___RASSF5	-3.74977	6.65361	21.835	1.43583e-05	0.00872611	3	5	Down-regulated
Sus_scrofa___GALNT16	-4.03487	6.06086	21.6295	1.65867e-05	0.00966036	3	5	Down-regulated
Sus_scrofa___VEGFC	-2.61348	7.69253	21.0895	2.23034e-05	0.0119906	3	5	Down-regulated
Sus_scrofa___TMEFF2	-3.48541	6.83527	20.625	2.47839e-05	0.0122769	3	5	Down-regulated
Sus_scrofa___RSPO2	-5.38793	5.53037	17.9863	7.48197e-05	0.0217512	3	5	Down-regulated
Sus_scrofa___MEOX2	-2.29896	7.48574	17.6149	8.88217e-05	0.0238759	3	5	Down-regulated
Sus_scrofa___MME	-3.63962	6.69492	16.9672	0.000104994	0.0271778	3	5	Down-regulated
Sus_scrofa___PPARG	-3.35999	6.32142	16.7078	0.000123384	0.0302573	3	5	Down-regulated
Sus_scrofa___COL21A1	-2.20384	8.0258	16.7449	0.000125841	0.0303276	3	5	Down-regulated
Sus_scrofa___ADM	-2.58746	7.12995	15.8827	0.000175082	0.0396058	3	5	Down-regulated

## Sheet: Homeostatic_vFB
Gene	logFC	logCPM	F	PValue	FDR	Observations_PCMV/PRV	Observations_3month_protocol	level
Sus_scrofa___RGS2	5.82483	5.25206	54.8376	1.96161e-09	3.98874e-05	3	7	Up-regulated
Sus_scrofa___ENSSSCG00000016263	3.66681	5.92168	50.4248	2.48048e-08	0.00020542	3	7	Up-regulated
Sus_scrofa___ENSSSCG00000031462	2.16511	7.8015	43.1537	1.37595e-07	0.000622676	3	7	Up-regulated
Sus_scrofa___ENSSSCG00000016687	2.83306	5.7718	39.2963	2.54448e-07	0.0007432	3	7	Up-regulated
Sus_scrofa___CCN4	5.77861	5.00703	36.8115	2.55847e-07	0.0007432	3	7	Up-regulated
Sus_scrofa___PI15	3.88184	6.86914	34.15	1.05664e-06	0.00214857	3	7	Up-regulated
Sus_scrofa___ENSSSCG00000006418	3.92886	4.18223	29.5948	1.95488e-06	0.00318764	3	7	Up-regulated
Sus_scrofa___PAPPA	2.75815	8.81795	32.2553	2.03793e-06	0.00318764	3	7	Up-regulated
Sus_scrofa___SERTAD4	4.19255	3.72738	27.3132	3.40195e-06	0.00494109	3	7	Up-regulated
Sus_scrofa___FRMPD4	3.4681	5.89692	27.5694	7.08046e-06	0.00899838	3	7	Up-regulated
Sus_scrofa___ENSSSCG00000009240	3.23088	4.97142	26.1282	7.5916e-06	0.00908045	3	7	Up-regulated
Sus_scrofa___BMP6	1.83119	9.13252	27.2791	8.13514e-06	0.00919	3	7	Up-regulated
Sus_scrofa___MX2	3.95826	7.40044	26.2716	9.09945e-06	0.00945527	3	7	Up-regulated
Sus_scrofa___GPM6B	1.71908	8.62597	26.536	1.01257e-05	0.00945527	3	7	Up-regulated
Sus_scrofa___AMPD3	5.29201	4.56095	25.369	1.023e-05	0.00945527	3	7	Up-regulated
Sus_scrofa___ENSSSCG00000004081	1.84869	6.50571	25.2771	1.29846e-05	0.0105611	3	7	Up-regulated
Sus_scrofa___DPYSL3	2.88207	6.94359	22.7168	2.93913e-05	0.0221349	3	7	Up-regulated
Sus_scrofa___KANK1	3.87021	4.87468	20.2661	4.77825e-05	0.0335037	3	7	Up-regulated
Sus_scrofa___MYLK	2.50077	7.11867	21.3415	5.01591e-05	0.0339945	3	7	Up-regulated
Sus_scrofa___ISYNA1	4.94296	3.17454	20.2099	5.78844e-05	0.0355316	3	7	Up-regulated
Sus_scrofa___ENSSSCG00000033786	3.30132	5.61283	20.3978	5.92511e-05	0.0355316	3	7	Up-regulated
Sus_scrofa___RCSD1	2.44283	6.13451	20.5763	6.11753e-05	0.0355316	3	7	Up-regulated
Sus_scrofa___OSBPL11	2.94546	5.54808	20.3419	6.28571e-05	0.0355316	3	7	Up-regulated
Sus_scrofa___ITPR1	1.36919	9.1309	20.6468	6.29063e-05	0.0355316	3	7	Up-regulated
Sus_scrofa___ENSSSCG00000016629	2.12448	8.27267	20.3713	6.90342e-05	0.0369405	3	7	Up-regulated
Sus_scrofa___GPC5	-8.11415	8.95566	47.6039	3.03069e-08	0.00020542	3	7	Down-regulated
Sus_scrofa___TMEFF2	-4.4914	8.61344	41.3343	1.53112e-07	0.000622676	3	7	Down-regulated
Sus_scrofa___CA10	-3.62653	8.24129	36.8799	4.92157e-07	0.00125094	3	7	Down-regulated
Sus_scrofa___TNXB	-3.07095	8.99154	35.2697	9.03806e-07	0.002042	3	7	Down-regulated
Sus_scrofa___COL6A6	-5.17379	8.43404	31.7989	1.82029e-06	0.00318764	3	7	Down-regulated
Sus_scrofa___ITGB3	-3.79082	7.32206	27.3122	6.93083e-06	0.00899838	3	7	Down-regulated
Sus_scrofa___CREB5	-1.86634	9.56158	26.7438	9.52567e-06	0.00945527	3	7	Down-regulated
Sus_scrofa___HMCN2	-5.04958	9.37345	25.4694	1.1879e-05	0.0105021	3	7	Down-regulated
Sus_scrofa___MITF	-4.00373	9.03394	25.7732	1.24006e-05	0.0105064	3	7	Down-regulated
Sus_scrofa___GALNT17	-3.71404	7.2096	24.8299	1.42088e-05	0.0111123	3	7	Down-regulated
Sus_scrofa___NRXN1	-10.518	8.37439	23.2597	3.10426e-05	0.0225436	3	7	Down-regulated
Sus_scrofa___PRDM6	-3.39134	6.81221	20.764	5.1826e-05	0.0339945	3	7	Down-regulated
Sus_scrofa___LTBP1	-1.96612	10.4534	20.3742	6.87826e-05	0.0369405	3	7	Down-regulated

## Sheet: Unassigned_Resident_immune
Gene	logFC	logCPM	F	PValue	FDR	Observations_PCMV/PRV	Observations_3month_protocol	level
Sus_scrofa___TENT2	4.75322	9.1349	39.981	1.43514e-08	0.000126591	3	6	Up-regulated
Sus_scrofa___SDC2	5.09431	9.97086	38.6168	2.37344e-08	0.000126591	3	6	Up-regulated
Sus_scrofa___HERC6	6.20768	9.30758	38.3964	2.87488e-08	0.000126591	3	6	Up-regulated
Sus_scrofa___APP	3.94276	10.6844	35.2172	9.34617e-08	0.000308657	3	6	Up-regulated
Sus_scrofa___NRP2	4.74014	8.51125	31.9012	2.39696e-07	0.000390888	3	6	Up-regulated
Sus_scrofa___ENSSSCG00000026043	9.7455	8.58357	33.7558	2.43684e-07	0.000390888	3	6	Up-regulated
Sus_scrofa___ITSN1	4.43499	9.99381	31.8712	2.64326e-07	0.000390888	3	6	Up-regulated
Sus_scrofa___SAMSN1	6.38005	8.72274	32.2704	2.66313e-07	0.000390888	3	6	Up-regulated
Sus_scrofa___SPP1	9.0432	7.06449	31.4197	3.68156e-07	0.000486334	3	6	Up-regulated
Sus_scrofa___RESF1	4.99566	8.59089	30.1683	5.19082e-07	0.000574751	3	6	Up-regulated
Sus_scrofa___MERTK	5.12645	9.01761	30.0444	5.22106e-07	0.000574751	3	6	Up-regulated
Sus_scrofa___VAV3	4.16819	10.6121	29.0352	7.94048e-07	0.000749241	3	6	Up-regulated
Sus_scrofa___CPQ	4.66504	8.99553	27.5354	1.24468e-06	0.00104453	3	6	Up-regulated
Sus_scrofa___TUT7	3.99756	10.1204	27.8105	1.26513e-06	0.00104453	3	6	Up-regulated
Sus_scrofa___PTK2B	8.84873	8.05293	28.0258	1.46792e-06	0.0011249	3	6	Up-regulated
Sus_scrofa___MACROH2A1	8.19157	7.97863	27.8408	1.57362e-06	0.0011249	3	6	Up-regulated
Sus_scrofa___WDFY2	4.15533	8.8128	26.8882	1.61795e-06	0.0011249	3	6	Up-regulated
Sus_scrofa___MX2	6.22617	9.37121	26.8397	1.80946e-06	0.00119515	3	6	Up-regulated
Sus_scrofa___HERC5	5.94308	8.39914	25.994	2.7565e-06	0.00167478	3	6	Up-regulated
Sus_scrofa___PDGFC	3.87963	9.46703	25.6274	2.78919e-06	0.00167478	3	6	Up-regulated
Sus_scrofa___ENSSSCG00000040016	4.81569	8.26453	25.4513	2.99565e-06	0.00171007	3	6	Up-regulated
Sus_scrofa___ENSSSCG00000017146	4.01634	9.27091	25.2323	3.22456e-06	0.00171007	3	6	Up-regulated
Sus_scrofa___NAGK	5.09259	7.37359	25.5274	3.23632e-06	0.00171007	3	6	Up-regulated
Sus_scrofa___SLC11A1	4.47719	9.06547	24.8809	3.39741e-06	0.00172615	3	6	Up-regulated
Sus_scrofa___FBXW11	4.34559	8.26511	24.816	3.95255e-06	0.00188994	3	6	Up-regulated
Sus_scrofa___KCNK13	8.28791	7.88752	25.0799	4.14221e-06	0.00188994	3	6	Up-regulated
Sus_scrofa___BACH1	4.39695	7.94585	24.6324	4.24064e-06	0.00188994	3	6	Up-regulated
Sus_scrofa___ACSL5	8.31559	7.33016	24.9701	4.29207e-06	0.00188994	3	6	Up-regulated
Sus_scrofa___ADGRL2	3.14954	9.43949	24.3511	4.91655e-06	0.00209508	3	6	Up-regulated
Sus_scrofa___ENSSSCG00000005959	4.22681	8.83052	23.903	5.34292e-06	0.00214837	3	6	Up-regulated
Sus_scrofa___PREX1	4.98382	9.09568	23.8231	5.5903e-06	0.00214837	3	6	Up-regulated
Sus_scrofa___ZEB2	3.4211	10.893	23.977	5.82151e-06	0.00214837	3	6	Up-regulated
Sus_scrofa___ATP8B4	8.31233	7.44095	24.1603	5.86446e-06	0.00214837	3	6	Up-regulated
Sus_scrofa___SLC23A2	3.66675	8.39698	23.5942	5.91363e-06	0.00214837	3	6	Up-regulated
Sus_scrofa___BNIP3L	7.85548	7.03043	24.1458	6.06441e-06	0.00214837	3	6	Up-regulated
Sus_scrofa___LCP1	3.84861	8.64001	23.4302	6.18003e-06	0.00214837	3	6	Up-regulated
Sus_scrofa___GPCPD1	4.51405	8.23944	23.5148	6.54037e-06	0.00221534	3	6	Up-regulated
Sus_scrofa___DRAM1	5.14436	7.23142	23.5143	6.87451e-06	0.00221889	3	6	Up-regulated
Sus_scrofa___F13A1	4.57447	10.546	23.3258	6.8868e-06	0.00221889	3	6	Up-regulated
Sus_scrofa___ENSSSCG00000034570	4.87147	7.96604	23.0865	7.49536e-06	0.00235665	3	6	Up-regulated
Sus_scrofa___TMEM156	5.17306	7.43254	23.2677	7.67114e-06	0.00235665	3	6	Up-regulated
Sus_scrofa___SMURF1	3.38861	9.12741	22.7172	8.61657e-06	0.00255764	3	6	Up-regulated
Sus_scrofa___EPSTI1	4.37185	8.48543	22.5725	8.90624e-06	0.00255764	3	6	Up-regulated
Sus_scrofa___VSIG4	8.73113	8.31986	23.1472	9.52496e-06	0.00266086	3	6	Up-regulated
Sus_scrofa___OAS2	4.39151	8.64284	22.3005	9.95493e-06	0.00266086	3	6	Up-regulated
Sus_scrofa___SAT1	3.26517	9.63228	22.4396	9.96354e-06	0.00266086	3	6	Up-regulated
Sus_scrofa___DOCK4	3.44765	10.4912	22.468	1.0296e-05	0.00266086	3	6	Up-regulated
Sus_scrofa___FAM126B	4.42273	7.98634	22.3836	1.03069e-05	0.00266086	3	6	Up-regulated
Sus_scrofa___FAM13A	3.25188	9.48541	22.2759	1.05089e-05	0.00266086	3	6	Up-regulated
Sus_scrofa___USP15	3.13412	9.1047	22.2264	1.08385e-05	0.00266086	3	6	Up-regulated
Sus_scrofa___OGFRL1	4.10069	8.35034	21.957	1.12234e-05	0.00266086	3	6	Up-regulated
Sus_scrofa___PPARG	3.94419	8.84182	21.9653	1.13296e-05	0.00266086	3	6	Up-regulated
Sus_scrofa___ETV6	3.43036	9.5327	22.061	1.1424e-05	0.00266086	3	6	Up-regulated
Sus_scrofa___PHF11	3.53081	8.74856	21.9661	1.15375e-05	0.00266086	3	6	Up-regulated
Sus_scrofa___VAPB	4.84237	7.95975	22.2901	1.16828e-05	0.00266086	3	6	Up-regulated
Sus_scrofa___FKBP5	3.25658	10.9711	22.0645	1.23596e-05	0.00272131	3	6	Up-regulated
Sus_scrofa___CCDC88A	3.78857	8.73444	21.7	1.27088e-05	0.00272131	3	6	Up-regulated
Sus_scrofa___ENSSSCG00000009240	8.6046	7.22567	22.1089	1.27645e-05	0.00272131	3	6	Up-regulated
Sus_scrofa___CDK6	3.04346	9.13857	21.8046	1.27722e-05	0.00272131	3	6	Up-regulated
Sus_scrofa___LCP2	5.34681	8.21876	22.1267	1.30129e-05	0.00272857	3	6	Up-regulated
Sus_scrofa___SLC49A4	7.80863	7.22568	22.147	1.32466e-05	0.00273418	3	6	Up-regulated
Sus_scrofa___PLXNC1	3.88927	8.51917	21.4929	1.34852e-05	0.00274061	3	6	Up-regulated
Sus_scrofa___PPM1H	5.26643	8.24269	21.7802	1.3995e-05	0.00280112	3	6	Up-regulated
Sus_scrofa___IL1A	8.27099	6.28472	21.755	1.46176e-05	0.00287314	3	6	Up-regulated
Sus_scrofa___PPP3CA	3.00639	9.63219	21.5404	1.47898e-05	0.00287314	3	6	Up-regulated
Sus_scrofa___TFEC	5.40876	8.21312	21.4993	1.55423e-05	0.00297557	3	6	Up-regulated
Sus_scrofa___ENSSSCG00000014540	4.21507	8.2483	21.2516	1.61895e-05	0.00302293	3	6	Up-regulated
Sus_scrofa___RASGEF1B	3.81859	7.95485	21.1222	1.62474e-05	0.00302293	3	6	Up-regulated
Sus_scrofa___ABCG2	3.18246	8.4618	21.0235	1.70804e-05	0.00311878	3	6	Up-regulated
Sus_scrofa___ENSSSCG00000036556	3.2936	8.61286	20.9627	1.72347e-05	0.00311878	3	6	Up-regulated
Sus_scrofa___DOCK8	3.89547	8.737	20.7639	1.84062e-05	0.00328575	3	6	Up-regulated
Sus_scrofa___IFIH1	8.19053	7.74772	21.2021	1.92022e-05	0.00333498	3	6	Up-regulated
Sus_scrofa___MX1	4.96847	8.03608	20.7745	1.94393e-05	0.00333498	3	6	Up-regulated
Sus_scrofa___STAT1	3.28755	8.67548	20.5936	2.04347e-05	0.00346081	3	6	Up-regulated
Sus_scrofa___LCORL	4.018	8.09158	20.6467	2.08775e-05	0.00349104	3	6	Up-regulated
Sus_scrofa___SYK	3.78187	8.21619	20.4004	2.11687e-05	0.00349548	3	6	Up-regulated
Sus_scrofa___PTPRJ	3.3371	9.6193	20.4338	2.27555e-05	0.00369254	3	6	Up-regulated
Sus_scrofa___RBPJ	3.51166	11.6248	20.5462	2.29263e-05	0.00369254	3	6	Up-regulated
Sus_scrofa___PELI1	3.35024	8.66598	20.2612	2.32006e-05	0.00369254	3	6	Up-regulated
Sus_scrofa___TSEN2	3.56843	8.21701	20.1162	2.44499e-05	0.0037998	3	6	Up-regulated
Sus_scrofa___PDE7B	3.39596	10.7394	20.3105	2.48637e-05	0.00381918	3	6	Up-regulated
Sus_scrofa___SNX9	2.89228	9.45964	20.2225	2.52283e-05	0.00383064	3	6	Up-regulated
Sus_scrofa___IGF2BP3	3.33424	8.45484	19.9606	2.61527e-05	0.00392588	3	6	Up-regulated
Sus_scrofa___GRB2	3.35369	8.80421	19.9096	2.7087e-05	0.00399129	3	6	Up-regulated
Sus_scrofa___PIK3AP1	3.25546	8.71093	19.9558	2.71927e-05	0.00399129	3	6	Up-regulated
Sus_scrofa___SETX	3.59635	8.56602	19.7486	2.85667e-05	0.00408212	3	6	Up-regulated
Sus_scrofa___TNFAIP8	4.09165	8.77999	19.7352	2.90077e-05	0.00408212	3	6	Up-regulated
Sus_scrofa___RNF114	7.95593	7.15087	20.1449	2.90671e-05	0.00408212	3	6	Up-regulated
Sus_scrofa___CARMIL1	3.35346	8.85522	19.7039	2.91475e-05	0.00408212	3	6	Up-regulated
Sus_scrofa___TNFAIP6	8.02476	6.20844	19.9586	2.93566e-05	0.00408212	3	6	Up-regulated
Sus_scrofa___ENSSSCG00000001229	2.94926	9.02006	19.7065	3.07958e-05	0.00423763	3	6	Up-regulated
Sus_scrofa___IFI44L	4.49471	7.79457	19.5699	3.24009e-05	0.00441254	3	6	Up-regulated
Sus_scrofa___BST2	4.91318	6.99318	19.5839	3.33764e-05	0.00445788	3	6	Up-regulated
Sus_scrofa___FRMD4A	2.90063	9.09539	19.4852	3.35613e-05	0.00445788	3	6	Up-regulated
Sus_scrofa___PSD3	3.0739	10.3207	19.5631	3.37463e-05	0.00445788	3	6	Up-regulated
Sus_scrofa___ZNF618	4.34218	7.89087	19.4522	3.409e-05	0.0044587	3	6	Up-regulated
Sus_scrofa___CD86	4.94615	7.51353	19.4134	3.61583e-05	0.00468286	3	6	Up-regulated
Sus_scrofa___CD80	4.77897	7.24534	19.3847	3.65262e-05	0.00468457	3	6	Up-regulated
Sus_scrofa___ADAM28	7.81396	6.95162	19.4682	3.7325e-05	0.00474099	3	6	Up-regulated
Sus_scrofa___NF1	2.72878	9.30854	19.2267	3.80088e-05	0.00478187	3	6	Up-regulated
Sus_scrofa___DENND4C	3.03401	8.54189	19.0804	3.86675e-05	0.00481885	3	6	Up-regulated
Sus_scrofa___SLC38A6	7.54991	7.26821	19.3026	4.0582e-05	0.00501017	3	6	Up-regulated
Sus_scrofa___NCF2	3.49225	7.98292	18.8618	4.11051e-05	0.00502776	3	6	Up-regulated
Sus_scrofa___SYNJ1	3.28763	8.38907	18.7664	4.30781e-05	0.00522074	3	6	Up-regulated
Sus_scrofa___ZNFX1	3.47549	8.29838	18.667	4.48634e-05	0.00538136	3	6	Up-regulated
Sus_scrofa___ENSSSCG00000004441	3.49843	8.47552	18.6425	4.52181e-05	0.00538136	3	6	Up-regulated
Sus_scrofa___FGGY	3.24154	8.26329	18.6267	4.57157e-05	0.005392	3	6	Up-regulated
Sus_scrofa___EEPD1	4.22562	8.34158	18.6931	4.62571e-05	0.00540758	3	6	Up-regulated
Sus_scrofa___ENSSSCG00000020967	7.90015	7.34446	18.8991	4.76078e-05	0.0055081	3	6	Up-regulated
Sus_scrofa___NUP98	3.49011	8.09526	18.5061	4.8826e-05	0.0055081	3	6	Up-regulated
Sus_scrofa___TCF12	2.71721	10.8863	18.7075	4.88386e-05	0.0055081	3	6	Up-regulated
Sus_scrofa___ATXN7L1	3.13332	8.77556	18.4566	4.92018e-05	0.0055081	3	6	Up-regulated
Sus_scrofa___ASXL1	7.47951	7.37554	18.847	4.967e-05	0.00551378	3	6	Up-regulated
Sus_scrofa___BCAS3	2.89928	9.29388	18.3743	5.21524e-05	0.00574111	3	6	Up-regulated
Sus_scrofa___RUNX1	2.97787	9.96005	18.4187	5.25978e-05	0.00574229	3	6	Up-regulated
Sus_scrofa___GNA13	3.81555	7.95151	18.3494	5.4139e-05	0.0058621	3	6	Up-regulated
Sus_scrofa___BMP2K	3.44305	8.70588	18.1922	5.49434e-05	0.00590083	3	6	Up-regulated
Sus_scrofa___IRAK2	3.49237	8.57074	18.1173	5.65358e-05	0.00602289	3	6	Up-regulated
Sus_scrofa___ISG15	8.22866	7.94548	18.3609	5.74023e-05	0.00602555	3	6	Up-regulated
Sus_scrofa___PFDN1	4.53362	7.56022	18.3112	5.83853e-05	0.00602555	3	6	Up-regulated
Sus_scrofa___SLC18A1	4.14689	7.41045	18.1681	5.97349e-05	0.00611704	3	6	Up-regulated
Sus_scrofa___ENSSSCG00000026996	7.69262	7.08277	18.2933	6.02729e-05	0.00612465	3	6	Up-regulated
Sus_scrofa___SAMD9	4.19336	7.47779	18.0258	6.1629e-05	0.00616807	3	6	Up-regulated
Sus_scrofa___ENSSSCG00000039144	7.47358	6.81457	18.2351	6.1634e-05	0.00616807	3	6	Up-regulated
Sus_scrofa___GAB2	2.79712	10.2789	18.0237	6.44043e-05	0.0062585	3	6	Up-regulated
Sus_scrofa___RIOK3	7.312	7.16265	18.1634	6.55714e-05	0.0062585	3	6	Up-regulated
Sus_scrofa___BCAT1	3.28104	8.99999	17.7773	6.61339e-05	0.0062585	3	6	Up-regulated
Sus_scrofa___CFLAR	3.04953	8.83831	17.8098	6.63215e-05	0.0062585	3	6	Up-regulated
Sus_scrofa___JAK1	2.78919	8.91188	17.8071	6.63928e-05	0.0062585	3	6	Up-regulated
Sus_scrofa___ADAR	4.45167	7.08301	17.9471	6.76459e-05	0.0062585	3	6	Up-regulated
Sus_scrofa___SH3KBP1	3.51337	8.40406	17.6914	6.76849e-05	0.0062585	3	6	Up-regulated
Sus_scrofa___RAB1A	4.56503	7.9245	17.9433	6.83097e-05	0.0062585	3	6	Up-regulated
Sus_scrofa___USP6NL	7.56696	7.26631	18.0416	6.86422e-05	0.0062585	3	6	Up-regulated
Sus_scrofa___ENSSSCG00000005949	7.85188	7.24022	17.9271	6.86966e-05	0.0062585	3	6	Up-regulated
Sus_scrofa___SCFD2	3.51996	8.58751	17.6539	6.92605e-05	0.00626666	3	6	Up-regulated
Sus_scrofa___RBM47	3.36645	9.75667	17.6444	7.23549e-05	0.00650209	3	6	Up-regulated
Sus_scrofa___IL1RAP	3.96734	7.70812	17.5005	7.5266e-05	0.00670552	3	6	Up-regulated
Sus_scrofa___SPRED1	3.10746	8.48231	17.459	7.56338e-05	0.00670552	3	6	Up-regulated
Sus_scrofa___EIF2AK2	3.31607	8.54649	17.4285	7.68394e-05	0.00676699	3	6	Up-regulated
Sus_scrofa___WDFY3	2.74243	9.78661	17.4828	7.94346e-05	0.00692279	3	6	Up-regulated
Sus_scrofa___SH3PXD2A	3.576	8.37466	17.3459	7.96567e-05	0.00692279	3	6	Up-regulated
Sus_scrofa___KYNU	3.63845	8.37254	17.2392	8.12445e-05	0.00693336	3	6	Up-regulated
Sus_scrofa___MAP4K3	3.24802	8.49814	17.2774	8.14445e-05	0.00693336	3	6	Up-regulated
Sus_scrofa___RNF38	2.96512	8.43133	17.2818	8.19934e-05	0.00693336	3	6	Up-regulated
Sus_scrofa___ARAP3	7.46129	7.17558	17.6085	8.21802e-05	0.00693336	3	6	Up-regulated
Sus_scrofa___HSD17B12	7.24456	7.19268	17.6074	8.24025e-05	0.00693336	3	6	Up-regulated
Sus_scrofa___IRF2	3.07222	8.46054	17.2081	8.39524e-05	0.00701097	3	6	Up-regulated
Sus_scrofa___ENSSSCG00000033909	4.20383	7.91075	17.2938	8.44067e-05	0.00701097	3	6	Up-regulated
Sus_scrofa___RAD51B	2.78187	9.32251	17.3078	8.49549e-05	0.00701097	3	6	Up-regulated
Sus_scrofa___IFNAR1	7.58927	7.55246	17.4984	8.63409e-05	0.00701097	3	6	Up-regulated
Sus_scrofa___NRP1	2.94032	10.1553	17.2975	8.65093e-05	0.00701097	3	6	Up-regulated
Sus_scrofa___P2RY12	3.55265	8.27553	17.0693	8.88445e-05	0.00711869	3	6	Up-regulated
Sus_scrofa___FYB1	4.75316	7.90229	17.3046	8.89162e-05	0.00711869	3	6	Up-regulated
Sus_scrofa___ABR	2.94693	8.98521	17.1488	8.95969e-05	0.00712997	3	6	Up-regulated
Sus_scrofa___RNF216	3.459	8.5136	16.9811	9.35516e-05	0.0074001	3	6	Up-regulated
Sus_scrofa___EPB41L2	2.86467	9.15698	16.904	9.91493e-05	0.00772104	3	6	Up-regulated
Sus_scrofa___ASAP1	2.69423	9.87726	16.9585	9.99097e-05	0.00772104	3	6	Up-regulated
Sus_scrofa___XPO6	3.33783	7.98175	16.8159	0.000100387	0.00772104	3	6	Up-regulated
Sus_scrofa___RCOR1	2.75787	8.61257	16.8429	0.000100411	0.00772104	3	6	Up-regulated
Sus_scrofa___RAP1B	3.00475	8.72874	16.8204	0.000100531	0.00772104	3	6	Up-regulated
Sus_scrofa___SCARB2	3.07653	8.25553	16.7451	0.000102506	0.00781771	3	6	Up-regulated
Sus_scrofa___SMAP2	4.0228	8.27573	16.7936	0.000103562	0.00781771	3	6	Up-regulated
Sus_scrofa___CD44	3.11068	8.68546	16.7233	0.000103565	0.00781771	3	6	Up-regulated
Sus_scrofa___FBXO11	3.00151	8.88335	16.707	0.000104719	0.0078599	3	6	Up-regulated
Sus_scrofa___VMP1	3.02491	8.60171	16.6304	0.000108438	0.00809301	3	6	Up-regulated
Sus_scrofa___BLVRB	7.21246	6.32913	16.6904	0.000112489	0.00830159	3	6	Up-regulated
Sus_scrofa___PIK3R1	2.94888	9.09201	16.5208	0.000116842	0.00857492	3	6	Up-regulated
Sus_scrofa___ANKRD44	3.00787	9.01031	16.4214	0.000118633	0.0085774	3	6	Up-regulated
Sus_scrofa___DEPTOR	4.80486	8.7986	16.6285	0.000118726	0.0085774	3	6	Up-regulated
Sus_scrofa___C1QB	7.84242	7.57464	16.8117	0.000118824	0.0085774	3	6	Up-regulated
Sus_scrofa___CLEC2B	3.83411	7.32912	16.4201	0.000120333	0.0086391	3	6	Up-regulated
Sus_scrofa___LRRC8D	3.83506	8.74813	16.3028	0.000123158	0.00879413	3	6	Up-regulated
Sus_scrofa___CLCN5	3.48586	8.71029	16.2518	0.000126729	0.00900049	3	6	Up-regulated
Sus_scrofa___TRIM33	4.42096	7.97261	16.4234	0.00012993	0.00917847	3	6	Up-regulated
Sus_scrofa___ENSSSCG00000028674	8.07177	8.02872	16.5188	0.000132303	0.00929639	3	6	Up-regulated
Sus_scrofa___PARP14	5.03876	7.55726	16.321	0.000135437	0.00941641	3	6	Up-regulated
Sus_scrofa___SRGN	4.68206	7.60914	16.2081	0.000139214	0.00962839	3	6	Up-regulated
Sus_scrofa___CYLD	4.18977	7.44847	16.2366	0.000140514	0.00966765	3	6	Up-regulated
Sus_scrofa___ARPC5	7.41036	6.83526	16.246	0.000142063	0.00972359	3	6	Up-regulated
Sus_scrofa___ATP2B1	2.91195	9.11398	16.0507	0.000143333	0.00975995	3	6	Up-regulated
Sus_scrofa___DOCK2	3.69439	8.80307	15.8979	0.000145834	0.00984288	3	6	Up-regulated
Sus_scrofa___RGS2	7.51823	7.23396	16.2351	0.000146041	0.00984288	3	6	Up-regulated
Sus_scrofa___MSR1	3.3234	8.91089	15.9605	0.000147491	0.00989012	3	6	Up-regulated
Sus_scrofa___MARCHF1	3.40044	10.0309	15.9705	0.000149824	0.00999582	3	6	Up-regulated
Sus_scrofa___ENSSSCG00000010954	4.33565	7.03593	16.0355	0.000151735	0.0100456	3	6	Up-regulated
Sus_scrofa___MYO1E	2.63095	9.08531	15.9507	0.000152092	0.0100456	3	6	Up-regulated
Sus_scrofa___KLHL5	3.61541	7.68798	15.9141	0.00015306	0.0100593	3	6	Up-regulated
Sus_scrofa___ENSSSCG00000033422	7.41743	7.28437	16.0629	0.00015407	0.0100755	3	6	Up-regulated
Sus_scrofa___SCPEP1	4.60277	7.39026	15.9164	0.000157982	0.0102683	3	6	Up-regulated
Sus_scrofa___PLEKHA2	3.14987	8.52679	15.7399	0.000158572	0.0102683	3	6	Up-regulated
Sus_scrofa___NIPBL	2.65263	9.28473	15.769	0.000162972	0.0105017	3	6	Up-regulated
Sus_scrofa___OLA1	3.78209	7.68239	15.7282	0.000165663	0.0105475	3	6	Up-regulated
Sus_scrofa___ERC1	2.80684	9.07444	15.6938	0.000165806	0.0105475	3	6	Up-regulated
Sus_scrofa___TRA2A	3.61304	7.98762	15.7289	0.000166078	0.0105475	3	6	Up-regulated
Sus_scrofa___SGMS1	2.5951	10.2013	15.7341	0.000169948	0.0107417	3	6	Up-regulated
Sus_scrofa___AFF1	2.80159	9.79083	15.6736	0.000172722	0.0107614	3	6	Up-regulated
Sus_scrofa___ENSSSCG00000015645	2.62858	10.0009	15.7	0.000172955	0.0107614	3	6	Up-regulated
Sus_scrofa___RAB7B	7.41267	6.26462	15.659	0.000173042	0.0107614	3	6	Up-regulated
Sus_scrofa___ZMYND8	2.87489	8.3524	15.5541	0.000173733	0.0107614	3	6	Up-regulated
Sus_scrofa___HEATR3	2.99055	8.61313	15.533	0.000174332	0.0107614	3	6	Up-regulated
Sus_scrofa___ROCK1	2.68311	9.0766	15.5518	0.000176912	0.0108284	3	6	Up-regulated
Sus_scrofa___KMT2E	2.61079	9.50155	15.5904	0.0001775	0.0108284	3	6	Up-regulated
Sus_scrofa___RAD23B	3.52113	7.50351	15.5712	0.000177877	0.0108284	3	6	Up-regulated
Sus_scrofa___ENSSSCG00000017791	4.56509	7.81423	15.6014	0.00018173	0.0109644	3	6	Up-regulated
Sus_scrofa___ENSSSCG00000039476	3.36878	7.70451	15.4368	0.000181771	0.0109644	3	6	Up-regulated
Sus_scrofa___ENSSSCG00000033457	3.94671	7.66392	15.4753	0.00018332	0.0110075	3	6	Up-regulated
Sus_scrofa___CMSS1	2.56978	9.04131	15.4588	0.000186441	0.0110901	3	6	Up-regulated
Sus_scrofa___IFIT5	7.74833	6.96072	15.5836	0.000188114	0.0110901	3	6	Up-regulated
Sus_scrofa___MAML2	2.5199	10.1842	15.5159	0.000188349	0.0110901	3	6	Up-regulated
Sus_scrofa___RIN2	2.77725	9.32081	15.4087	0.000188893	0.0110901	3	6	Up-regulated
Sus_scrofa___MTSS1	2.64807	10.3828	15.4961	0.000190022	0.011107	3	6	Up-regulated
Sus_scrofa___RAB10	2.94667	8.59706	15.312	0.000193043	0.0111248	3	6	Up-regulated
Sus_scrofa___OSBPL11	3.12976	9.17755	15.3546	0.000193613	0.0111248	3	6	Up-regulated
Sus_scrofa___NDFIP1	2.89218	8.16066	15.2888	0.000194134	0.0111248	3	6	Up-regulated
Sus_scrofa___FMNL3	3.0497	7.66423	15.2842	0.00019427	0.0111248	3	6	Up-regulated
Sus_scrofa___SMG1	2.8842	8.18396	15.2854	0.000194537	0.0111248	3	6	Up-regulated
Sus_scrofa___LRCH1	2.55702	9.53681	15.3637	0.0001983	0.0112779	3	6	Up-regulated
Sus_scrofa___SOAT1	3.5667	7.63124	15.2238	0.000198921	0.0112779	3	6	Up-regulated
Sus_scrofa___ENSSSCG00000050398	7.30163	6.56052	15.3656	0.000201861	0.0113957	3	6	Up-regulated
Sus_scrofa___PIK3CB	3.07045	8.45299	15.1816	0.000203666	0.0114486	3	6	Up-regulated
Sus_scrofa___VPS13C	2.79874	8.86032	15.2043	0.000205957	0.0115284	3	6	Up-regulated
Sus_scrofa___PRSS55	3.01955	8.62343	15.0626	0.000214512	0.011934	3	6	Up-regulated
Sus_scrofa___PTPRC	2.98002	9.24461	15.1125	0.000215011	0.011934	3	6	Up-regulated
Sus_scrofa___MYCBP2	2.63404	9.35694	15.1086	0.000217825	0.0120396	3	6	Up-regulated
Sus_scrofa___PTPN1	2.75579	8.21425	15.0283	0.000218997	0.012054	3	6	Up-regulated
Sus_scrofa___TBC1D2B	3.28945	7.61013	14.9922	0.00022067	0.0120905	3	6	Up-regulated
Sus_scrofa___IFIT1	4.86418	7.77684	15.1369	0.000221491	0.0120905	3	6	Up-regulated
Sus_scrofa___SNX10	3.29018	7.44686	14.9372	0.000224499	0.0121745	3	6	Up-regulated
Sus_scrofa___ZC3H12C	4.43462	7.47527	15.1281	0.000224874	0.0121745	3	6	Up-regulated
Sus_scrofa___CYP20A1	2.27362	9.38978	15.0683	0.000226814	0.0121897	3	6	Up-regulated
Sus_scrofa___CMAH	4.31865	6.91182	15.0822	0.000227	0.0121897	3	6	Up-regulated
Sus_scrofa___SMCHD1	2.71724	9.15069	14.9554	0.000232734	0.0124372	3	6	Up-regulated
Sus_scrofa___CTTNBP2NL	2.96808	8.22422	14.8799	0.000233492	0.0124372	3	6	Up-regulated
Sus_scrofa___ZNF407	3.04075	8.3692	14.8307	0.000238095	0.0125573	3	6	Up-regulated
Sus_scrofa___POLR1F	6.93606	6.93535	15.0832	0.000238957	0.0125573	3	6	Up-regulated
Sus_scrofa___ENO1	3.08714	8.19165	14.8115	0.000239512	0.0125573	3	6	Up-regulated
Sus_scrofa___EPS8	2.81612	9.19912	14.8489	0.000239639	0.0125573	3	6	Up-regulated
Sus_scrofa___GGNBP2	4.17823	7.66166	14.9857	0.000240799	0.0125573	3	6	Up-regulated
Sus_scrofa___ENSSSCG00000012202	4.33425	7.504	14.948	0.000242006	0.0125573	3	6	Up-regulated
Sus_scrofa___MLXIP	3.47199	8.45561	14.8053	0.000242401	0.0125573	3	6	Up-regulated
Sus_scrofa___APBB1IP	3.28314	8.6777	14.7182	0.00024645	0.0127172	3	6	Up-regulated
Sus_scrofa___DOCK10	2.93629	9.55381	14.8005	0.000249992	0.0128381	3	6	Up-regulated
Sus_scrofa___ATP6V1B2	4.25506	7.10365	14.8572	0.000250736	0.0128381	3	6	Up-regulated
Sus_scrofa___B2M	2.4515	8.79188	14.7565	0.000256786	0.0130612	3	6	Up-regulated
Sus_scrofa___TNFSF4	3.2126	7.61679	14.6773	0.000257147	0.0130612	3	6	Up-regulated
Sus_scrofa___RNF217	4.2777	7.90359	14.8286	0.00025806	0.0130612	3	6	Up-regulated
Sus_scrofa___ENSSSCG00000014997	4.64746	7.61371	14.7491	0.000265069	0.0133647	3	6	Up-regulated
Sus_scrofa___RBMS1	2.46777	9.36746	14.6877	0.000266087	0.0133651	3	6	Up-regulated
Sus_scrofa___PARP12	3.91285	7.56678	14.5504	0.000278223	0.0139217	3	6	Up-regulated
Sus_scrofa___HPRT1	7.14098	6.32987	14.6234	0.000282898	0.0141022	3	6	Up-regulated
Sus_scrofa___STK17A	3.49267	7.92299	14.4332	0.000286491	0.0141743	3	6	Up-regulated
Sus_scrofa___ARHGAP35	2.69438	8.6657	14.427	0.000289198	0.0142549	3	6	Up-regulated
Sus_scrofa___IFI44	3.59015	7.56491	14.3768	0.000291136	0.0142971	3	6	Up-regulated
Sus_scrofa___TRAPPC8	4.11494	7.7978	14.5413	0.000292973	0.014334	3	6	Up-regulated
Sus_scrofa___LUC7L	3.4294	7.82672	14.4	0.000298018	0.0145234	3	6	Up-regulated
Sus_scrofa___TNIP1	3.40709	7.69301	14.3385	0.000299043	0.0145234	3	6	Up-regulated
Sus_scrofa___ARHGEF11	2.93544	8.36411	14.3112	0.000300296	0.0145308	3	6	Up-regulated
Sus_scrofa___PLCG2	4.3213	7.72188	14.4312	0.00030303	0.01459	3	6	Up-regulated
Sus_scrofa___HLCS	7.09949	6.93619	14.5322	0.000303728	0.01459	3	6	Up-regulated
Sus_scrofa___GNA12	3.37822	8.23751	14.2661	0.000308406	0.014761	3	6	Up-regulated
Sus_scrofa___ZSWIM6	2.50518	9.84676	14.3469	0.000310635	0.0148097	3	6	Up-regulated
Sus_scrofa___CSE1L	4.05499	7.35962	14.3911	0.00031217	0.0148097	3	6	Up-regulated
Sus_scrofa___VTI1A	2.62769	8.72664	14.2506	0.00031366	0.0148097	3	6	Up-regulated
Sus_scrofa___SNX24	2.81369	9.33008	14.2814	0.000313907	0.0148097	3	6	Up-regulated
Sus_scrofa___LRMDA	2.57909	10.614	14.3244	0.000316863	0.0148959	3	6	Up-regulated
Sus_scrofa___RUFY3	2.90064	7.89673	14.1573	0.000321664	0.015068	3	6	Up-regulated
Sus_scrofa___PALD1	7.37242	7.29812	14.3414	0.000324967	0.0151425	3	6	Up-regulated
Sus_scrofa___ADAM9	2.77936	8.24882	14.1267	0.000326064	0.0151425	3	6	Up-regulated
Sus_scrofa___AASDH	7.03412	6.92147	14.3659	0.000326693	0.0151425	3	6	Up-regulated
Sus_scrofa___FAM76A	3.56272	7.54309	14.173	0.000330279	0.0152095	3	6	Up-regulated
Sus_scrofa___RASSF3	2.60641	8.9652	14.1655	0.000330441	0.0152095	3	6	Up-regulated
Sus_scrofa___ISG12(A)	4.59034	6.87077	14.1628	0.000332363	0.0152448	3	6	Up-regulated
Sus_scrofa___ENSSSCG00000016263	3.43647	8.64323	14.0525	0.000338885	0.015482	3	6	Up-regulated
Sus_scrofa___RAP1A	2.58958	8.69235	14.0843	0.000340896	0.015482	3	6	Up-regulated
Sus_scrofa___MED27	3.55812	7.86452	14.0987	0.00034105	0.015482	3	6	Up-regulated
Sus_scrofa___FMN1	3.94462	8.30083	14.0285	0.000344767	0.0155972	3	6	Up-regulated
Sus_scrofa___TBC1D2	7.04343	6.67246	14.1367	0.000347352	0.0156376	3	6	Up-regulated
Sus_scrofa___RPAP2	4.09452	7.63338	14.1456	0.000348029	0.0156376	3	6	Up-regulated
Sus_scrofa___ENSSSCG00000005738	7.20016	7.11668	14.191	0.000351626	0.0156978	3	6	Up-regulated
Sus_scrofa___CCDC180	4.2078	6.99345	14.1074	0.000351746	0.0156978	3	6	Up-regulated
Sus_scrofa___FTL	7.39524	7.44908	14.1241	0.000354253	0.0157565	3	6	Up-regulated
Sus_scrofa___SLC30A9	6.92882	6.99591	14.1448	0.000360462	0.0159421	3	6	Up-regulated
Sus_scrofa___UBASH3B	3.0082	9.72821	13.9183	0.000365568	0.0160862	3	6	Up-regulated
Sus_scrofa___ENSSSCG00000028461	4.18501	7.30496	14.0154	0.000366537	0.0160862	3	6	Up-regulated
Sus_scrofa___ENSSSCG00000005518	2.57149	9.04233	13.9298	0.000368037	0.0160986	3	6	Up-regulated
Sus_scrofa___DPYD	2.36812	9.65105	13.9528	0.000370837	0.0161675	3	6	Up-regulated
Sus_scrofa___ELF1	2.52328	9.09092	13.8875	0.000374225	0.0162616	3	6	Up-regulated
Sus_scrofa___ANKFY1	2.41953	9.01721	13.8953	0.000376421	0.0162774	3	6	Up-regulated
Sus_scrofa___EHD4	2.91787	8.59812	13.829	0.000377054	0.0162774	3	6	Up-regulated
Sus_scrofa___ENSSSCG00000036618	4.43514	7.10185	13.9158	0.000378787	0.0162989	3	6	Up-regulated
Sus_scrofa___PFKFB3	3.0146	8.30778	13.7727	0.000383028	0.0164279	3	6	Up-regulated
Sus_scrofa___ENSSSCG00000005725	3.35251	7.53969	13.8323	0.000384424	0.0164344	3	6	Up-regulated
Sus_scrofa___FAM172A	2.4186	9.00335	13.8125	0.000389565	0.0166005	3	6	Up-regulated
Sus_scrofa___UNC93B1	4.38302	7.2143	13.8263	0.000393771	0.0167258	3	6	Up-regulated
Sus_scrofa___NOTCH2	2.804	8.65575	13.6921	0.000398724	0.0168819	3	6	Up-regulated
Sus_scrofa___ENSSSCG00000015313	6.90368	7.10113	13.886	0.000403831	0.0170435	3	6	Up-regulated
Sus_scrofa___HDAC9	2.55232	10.1319	13.7541	0.000407499	0.0171435	3	6	Up-regulated
Sus_scrofa___CTSS	3.4878	7.9145	13.652	0.000412761	0.0172006	3	6	Up-regulated
Sus_scrofa___TTC13	2.85993	7.97219	13.593	0.000414349	0.0172124	3	6	Up-regulated
Sus_scrofa___ENSSSCG00000000657	3.81403	8.15939	13.5972	0.000421065	0.0173889	3	6	Up-regulated
Sus_scrofa___C3orf70	7.20708	6.53929	13.7477	0.00042123	0.0173889	3	6	Up-regulated
Sus_scrofa___TM9SF3	3.4716	7.79191	13.5936	0.000427935	0.0176107	3	6	Up-regulated
Sus_scrofa___KLHL8	7.13591	6.78799	13.7151	0.00043202	0.0177236	3	6	Up-regulated
Sus_scrofa___LRP6	2.59332	8.34686	13.4966	0.00043595	0.0177504	3	6	Up-regulated
Sus_scrofa___DTNBP1	2.9316	7.69598	13.4818	0.00043626	0.0177504	3	6	Up-regulated
Sus_scrofa___BABAM2	2.34247	9.03691	13.56	0.000436705	0.0177504	3	6	Up-regulated
Sus_scrofa___ENSSSCG00000028679	6.888	6.96058	13.6416	0.000448774	0.0181274	3	6	Up-regulated
Sus_scrofa___ANKRD11	2.42387	9.45263	13.4955	0.000448936	0.0181274	3	6	Up-regulated
Sus_scrofa___NOL11	2.62304	9.35833	13.4776	0.000450097	0.0181274	3	6	Up-regulated
Sus_scrofa___ARPC2	2.6242	8.36687	13.4089	0.000455057	0.0182715	3	6	Up-regulated
Sus_scrofa___PRDX1	6.76036	6.38953	13.5168	0.000460921	0.0184508	3	6	Up-regulated
Sus_scrofa___NLRP3	3.2966	8.17202	13.3685	0.000466033	0.0185991	3	6	Up-regulated
Sus_scrofa___EIF3H	4.09141	7.60484	13.4751	0.000469242	0.0186054	3	6	Up-regulated
Sus_scrofa___IRS2	7.21798	7.57246	13.5527	0.000469297	0.0186054	3	6	Up-regulated
Sus_scrofa___MGMT	2.44495	8.35264	13.3549	0.000470417	0.0186054	3	6	Up-regulated
Sus_scrofa___MGAT4A	2.40934	9.309	13.3914	0.000471928	0.0186094	3	6	Up-regulated
Sus_scrofa___NOL4L	3.18258	8.10297	13.3005	0.000477142	0.018759	3	6	Up-regulated
Sus_scrofa___SLC16A7	2.57692	9.39852	13.3499	0.000478915	0.0187729	3	6	Up-regulated
Sus_scrofa___LAT2	6.97339	6.73325	13.4436	0.000481878	0.0188332	3	6	Up-regulated
Sus_scrofa___ARID1B	2.22906	9.95257	13.3617	0.000485475	0.0189178	3	6	Up-regulated
Sus_scrofa___CAPZA1	2.75269	8.29352	13.2428	0.000488577	0.0189775	3	6	Up-regulated
Sus_scrofa___MARF1	6.94245	6.79505	13.4395	0.00048988	0.0189775	3	6	Up-regulated
Sus_scrofa___DENND4A	3.01786	8.08267	13.2337	0.000492518	0.0189961	3	6	Up-regulated
Sus_scrofa___RAC1	3.11219	7.67213	13.2302	0.000493237	0.0189961	3	6	Up-regulated
Sus_scrofa___JDP2	6.94245	6.66532	13.3733	0.000494962	0.0190071	3	6	Up-regulated
Sus_scrofa___MAPKAP1	2.75935	8.24752	13.186	0.000499918	0.0191418	3	6	Up-regulated
Sus_scrofa___CHSY1	3.0729	7.80259	13.1732	0.000502008	0.0191663	3	6	Up-regulated
Sus_scrofa___ZNF609	2.33322	9.46273	13.2396	0.000507788	0.0193108	3	6	Up-regulated
Sus_scrofa___CNBP	6.86786	7.04002	13.3623	0.000508717	0.0193108	3	6	Up-regulated
Sus_scrofa___ENSSSCG00000007719	6.88855	6.56422	13.3209	0.000511827	0.0193732	3	6	Up-regulated
Sus_scrofa___SLC39A11	3.02276	8.49321	13.0993	0.000520448	0.0196432	3	6	Up-regulated
Sus_scrofa___CMIP	2.39789	9.23331	13.1686	0.000521947	0.0196437	3	6	Up-regulated
Sus_scrofa___GRK3	3.01896	8.90537	13.0478	0.0005366	0.0201377	3	6	Up-regulated
Sus_scrofa___VPS54	2.48663	9.113	13.1029	0.000539706	0.0201969	3	6	Up-regulated
Sus_scrofa___LY96	6.91545	6.50235	13.1539	0.000543771	0.0202916	3	6	Up-regulated
Sus_scrofa___SH3BP5	3.08131	8.32121	12.9551	0.000554018	0.0206157	3	6	Up-regulated
Sus_scrofa___MXD1	7.1428	6.85645	13.1262	0.000558725	0.0207325	3	6	Up-regulated
Sus_scrofa___AFF4	2.24303	8.64533	12.9722	0.000564341	0.0208822	3	6	Up-regulated
Sus_scrofa___ENSSSCG00000027349	6.97423	6.94045	13.0753	0.000567383	0.020884	3	6	Up-regulated
Sus_scrofa___TAF15	2.8131	7.92041	12.9064	0.000567896	0.020884	3	6	Up-regulated
Sus_scrofa___PAMR1	4.17798	6.94883	13.0309	0.000569131	0.020884	3	6	Up-regulated
Sus_scrofa___GNAQ	2.39234	9.89203	12.9697	0.000578275	0.0209941	3	6	Up-regulated
Sus_scrofa___MCUB	2.81298	8.33079	12.8639	0.00057918	0.0209941	3	6	Up-regulated
Sus_scrofa___CASP10	3.24707	7.5825	12.8764	0.000580062	0.0209941	3	6	Up-regulated
Sus_scrofa___BTBD9	2.20324	9.2657	12.9362	0.000581287	0.0209941	3	6	Up-regulated
pCMV_____gp45	7.49054	5.56315	13.2733	0.000583105	0.0209941	3	6	Up-regulated
Sus_scrofa___SNX14	2.77136	7.71043	12.841	0.000584815	0.0209941	3	6	Up-regulated
Sus_scrofa___PSPC1	2.36098	9.12543	12.9053	0.000584846	0.0209941	3	6	Up-regulated
Sus_scrofa___GPATCH2	2.94038	7.90948	12.8112	0.000592985	0.0211351	3	6	Up-regulated
Sus_scrofa___RGL1	2.6499	10.2348	12.9157	0.00059327	0.0211351	3	6	Up-regulated
Sus_scrofa___ZC3HAV1	2.77087	8.33481	12.8268	0.000594193	0.0211351	3	6	Up-regulated
Sus_scrofa___MYORG	2.93571	7.50382	12.8138	0.000595176	0.0211351	3	6	Up-regulated
Sus_scrofa___MARK3	2.43463	8.93007	12.8476	0.000600175	0.0212555	3	6	Up-regulated
Sus_scrofa___AMBRA1	2.52254	8.70688	12.8074	0.000605353	0.0213209	3	6	Up-regulated
Sus_scrofa___NBN	2.47939	8.63986	12.8045	0.000606861	0.0213209	3	6	Up-regulated
Sus_scrofa___TXNIP	2.93985	8.73711	12.7468	0.000611176	0.0214082	3	6	Up-regulated
Sus_scrofa___FOXP1	2.235	10.5074	12.8517	0.000612588	0.0214082	3	6	Up-regulated
Sus_scrofa___HMOX1	3.71976	7.51797	12.7306	0.000615155	0.0214412	3	6	Up-regulated
Sus_scrofa___SLTM	3.39902	7.67223	12.7826	0.00061837	0.0214965	3	6	Up-regulated
Sus_scrofa___ENSSSCG00000010531	6.81774	6.9728	12.9121	0.000620381	0.0215098	3	6	Up-regulated
Sus_scrofa___ANO6	2.67849	8.6814	12.7172	0.000624686	0.0216023	3	6	Up-regulated
Sus_scrofa___TPR	3.85109	7.58175	12.8272	0.000627908	0.0216571	3	6	Up-regulated
Sus_scrofa___CD163	3.19311	11.5092	12.7768	0.000643842	0.0221488	3	6	Up-regulated
Sus_scrofa___FBXO39	2.88974	8.22819	12.6219	0.000647928	0.0222315	3	6	Up-regulated
Sus_scrofa___ENSSSCG00000014280	2.48112	8.91406	12.6379	0.00065691	0.0224813	3	6	Up-regulated
Sus_scrofa___CD53	4.29448	7.15551	12.6688	0.000664397	0.0226788	3	6	Up-regulated
Sus_scrofa___SP110	7.17227	6.77172	12.7122	0.000672736	0.0228453	3	6	Up-regulated
Sus_scrofa___CTSB	3.2155	8.25235	12.4893	0.000680103	0.0229534	3	6	Up-regulated
Sus_scrofa___CASP8	7.06897	6.50111	12.6605	0.000680415	0.0229534	3	6	Up-regulated
Sus_scrofa___TET2	2.48332	8.91544	12.5635	0.000681129	0.0229534	3	6	Up-regulated
Sus_scrofa___PIP4K2A	2.21642	9.66273	12.586	0.000688419	0.02314	3	6	Up-regulated
Sus_scrofa___ARHGAP18	2.3287	8.52633	12.5125	0.000692338	0.0232126	3	6	Up-regulated
Sus_scrofa___RAP2A	4.03423	6.94729	12.5645	0.000700229	0.0234065	3	6	Up-regulated
Sus_scrofa___ARHGAP12	2.37853	8.43777	12.4895	0.000703139	0.0234065	3	6	Up-regulated
Sus_scrofa___ZDHHC18	6.94024	6.63677	12.6019	0.000705188	0.0234065	3	6	Up-regulated
Sus_scrofa___FLI1	2.78162	9.55537	12.4681	0.000705206	0.0234065	3	6	Up-regulated
Sus_scrofa___SKAP2	2.90495	8.49088	12.424	0.000709321	0.0234247	3	6	Up-regulated
Sus_scrofa___ESCO1	3.88131	7.78057	12.5573	0.000709583	0.0234247	3	6	Up-regulated
Sus_scrofa___PSMD14	2.98132	7.45035	12.4264	0.000711076	0.0234247	3	6	Up-regulated
Sus_scrofa___RNF169	2.18126	9.03189	12.4537	0.000723607	0.0237782	3	6	Up-regulated
Sus_scrofa___TMEM50B	3.99783	7.39664	12.4948	0.000726995	0.0238224	3	6	Up-regulated
Sus_scrofa___SNX2	2.794	8.30087	12.3623	0.00072967	0.0238224	3	6	Up-regulated
Sus_scrofa___LYST	3.29312	7.99927	12.4113	0.0007325	0.0238333	3	6	Up-regulated
Sus_scrofa___EVI5	2.51677	8.60883	12.3727	0.000734959	0.0238508	3	6	Up-regulated
Sus_scrofa___PAFAH1B1	2.31509	8.92648	12.3851	0.000736649	0.0238508	3	6	Up-regulated
Sus_scrofa___LSAMP	3.71228	9.37965	12.3032	0.000740478	0.0238921	3	6	Up-regulated
Sus_scrofa___GLCE	2.78078	7.80142	12.3223	0.000741542	0.0238921	3	6	Up-regulated
Sus_scrofa___MORC3	2.86391	7.77836	12.3125	0.000746036	0.0239784	3	6	Up-regulated
Sus_scrofa___PLXDC2	2.72139	9.10747	12.3251	0.000751929	0.0240038	3	6	Up-regulated
Sus_scrofa___CEBPD	6.70377	5.88494	12.3849	0.000752937	0.0240038	3	6	Up-regulated
Sus_scrofa___LYN	2.69158	7.86737	12.2927	0.000754033	0.0240038	3	6	Up-regulated
Sus_scrofa___SUSD6	2.86504	7.96926	12.2828	0.000755911	0.0240038	3	6	Up-regulated
Sus_scrofa___ENSSSCG00000017754	3.39504	7.17274	12.2461	0.000764452	0.0242168	3	6	Up-regulated
Sus_scrofa___NIBAN1	2.45421	8.22699	12.2665	0.000770863	0.0243615	3	6	Up-regulated
Sus_scrofa___TBC1D22B	6.73337	6.52478	12.3937	0.000777354	0.0244545	3	6	Up-regulated
Sus_scrofa___CTDSPL2	3.29949	7.77449	12.2798	0.000777507	0.0244545	3	6	Up-regulated
Sus_scrofa___AP2A2	3.06606	8.18449	12.2142	0.000785675	0.02465	3	6	Up-regulated
Sus_scrofa___SPEN	2.54017	8.88579	12.2253	0.000788135	0.02465	3	6	Up-regulated
Sus_scrofa___TAOK1	2.59149	8.43821	12.1995	0.000789323	0.02465	3	6	Up-regulated
Sus_scrofa___KMT2C	2.10876	9.63971	12.2536	0.000796825	0.0248256	3	6	Up-regulated
Sus_scrofa___SLC2A13	2.75316	8.17487	12.1458	0.000805843	0.0249482	3	6	Up-regulated
Sus_scrofa___PAN3	2.50086	8.81513	12.182	0.000805985	0.0249482	3	6	Up-regulated
Sus_scrofa___EXOC4	2.09478	10.2628	12.236	0.000810685	0.0249482	3	6	Up-regulated
Sus_scrofa___CBL	2.99106	8.2821	12.1235	0.000814494	0.0249482	3	6	Up-regulated
Sus_scrofa___ARRB1	3.00268	8.23175	12.1028	0.000815961	0.0249482	3	6	Up-regulated
Sus_scrofa___NSD3	2.16595	8.80826	12.1643	0.000817085	0.0249482	3	6	Up-regulated
Sus_scrofa___SOGA1	3.02501	7.30925	12.118	0.000818016	0.0249482	3	6	Up-regulated
Sus_scrofa___STX12	3.43392	7.64351	12.1696	0.000818297	0.0249482	3	6	Up-regulated
Sus_scrofa___IRAG2	6.92538	6.81252	12.265	0.00081846	0.0249482	3	6	Up-regulated
Sus_scrofa___MTDH	2.54514	8.17351	12.1186	0.000819645	0.0249482	3	6	Up-regulated
Sus_scrofa___SWAP70	3.87199	7.36874	12.2266	0.000822308	0.0249717	3	6	Up-regulated
Sus_scrofa___TFE3	6.54728	6.21949	12.211	0.000832117	0.025147	3	6	Up-regulated
Sus_scrofa___SNTB2	3.21633	7.82861	12.1295	0.00083379	0.025147	3	6	Up-regulated
Sus_scrofa___SOCS6	6.68047	6.35809	12.1817	0.000850478	0.0255913	3	6	Up-regulated
Sus_scrofa___ITGAL	6.71891	6.76631	12.1681	0.000853406	0.0255913	3	6	Up-regulated
Sus_scrofa___ABHD12	4.09831	7.41554	12.143	0.000854336	0.0255913	3	6	Up-regulated
Sus_scrofa___VPS35L	2.70146	7.75568	11.9992	0.000862834	0.0257874	3	6	Up-regulated
Sus_scrofa___FRMD4B	2.36243	10.4563	12.0846	0.0008676	0.0258713	3	6	Up-regulated
Sus_scrofa___PSMB7	6.57783	6.65416	12.1353	0.000870937	0.0259123	3	6	Up-regulated
Sus_scrofa___SLC9A8	3.2524	7.45086	12.0244	0.000873734	0.0259283	3	6	Up-regulated
Sus_scrofa___ABCA1	2.49814	8.49562	12.0104	0.000875617	0.0259283	3	6	Up-regulated
Sus_scrofa___RASSF2	7.01398	6.84745	12.1321	0.000879337	0.0259283	3	6	Up-regulated
Sus_scrofa___MAP4K4	2.28287	8.49049	12.0008	0.000880591	0.0259283	3	6	Up-regulated
Sus_scrofa___RAB31	2.61519	8.16037	11.9534	0.000881889	0.0259283	3	6	Up-regulated
Sus_scrofa___PCMT1	3.82238	7.46905	12.0712	0.00088325	0.0259283	3	6	Up-regulated
Sus_scrofa___IFIT2	7.43358	7.11329	12.072	0.00088682	0.0259294	3	6	Up-regulated
Sus_scrofa___INPP4A	2.89862	7.92922	11.9169	0.000888496	0.0259294	3	6	Up-regulated
Sus_scrofa___GTDC1	2.43532	8.63616	11.9671	0.000889178	0.0259294	3	6	Up-regulated
Sus_scrofa___VKORC1L1	3.85708	7.64428	12.0482	0.00089341	0.0259955	3	6	Up-regulated
Sus_scrofa___DPP8	3.33339	7.84558	11.966	0.000896721	0.0260345	3	6	Up-regulated
Sus_scrofa___UGCG	6.85334	6.74039	12.0694	0.000900692	0.0260924	3	6	Up-regulated
Sus_scrofa___SDCBP	3.0513	7.67435	11.8979	0.000908875	0.0261574	3	6	Up-regulated
Sus_scrofa___SGPL1	6.677	6.74697	12.0358	0.000911156	0.026166	3	6	Up-regulated
Sus_scrofa___IRF5	7.13226	7.22295	12.0889	0.000916769	0.0262498	3	6	Up-regulated
Sus_scrofa___CEPT1	7.24927	7.2254	12.0313	0.000918753	0.0262498	3	6	Up-regulated
Sus_scrofa___TXNRD1	2.58314	7.97142	11.8415	0.000932633	0.0265114	3	6	Up-regulated
Sus_scrofa___N4BP1	2.55011	8.06966	11.8381	0.00093386	0.0265114	3	6	Up-regulated
Sus_scrofa___ENSSSCG00000007098	3.31489	7.11492	11.8636	0.000936501	0.0265114	3	6	Up-regulated
Sus_scrofa___ZFP36L1	2.74759	7.82322	11.8096	0.000942587	0.0265114	3	6	Up-regulated
Sus_scrofa___ARHGAP6	2.43991	9.0164	11.8647	0.000942738	0.0265114	3	6	Up-regulated
Sus_scrofa___RC3H1	2.489	8.5265	11.8375	0.000943238	0.0265114	3	6	Up-regulated
Sus_scrofa___NUP58	6.49754	6.71298	11.9759	0.000943252	0.0265114	3	6	Up-regulated
Sus_scrofa___PLEK	2.92457	7.23711	11.7823	0.00094931	0.026537	3	6	Up-regulated
Sus_scrofa___ENSSSCG00000013556	7.29406	7.14565	11.9232	0.000950188	0.026537	3	6	Up-regulated
Sus_scrofa___G3BP2	3.93	7.26025	11.883	0.000960094	0.026757	3	6	Up-regulated
Sus_scrofa___STAT6	6.68145	6.52158	11.8871	0.000968424	0.0269324	3	6	Up-regulated
Sus_scrofa___FAM120A	2.65998	7.9389	11.7405	0.000974198	0.0270081	3	6	Up-regulated
Sus_scrofa___COX2	2.95321	8.37529	11.7362	0.000978153	0.0270081	3	6	Up-regulated
Sus_scrofa___ARID1A	3.17324	8.00265	11.738	0.000981203	0.0270081	3	6	Up-regulated
Sus_scrofa___CPEB2	3.41757	7.77943	11.7672	0.000982892	0.0270081	3	6	Up-regulated
Sus_scrofa___EIF4G3	2.00417	9.84946	11.8082	0.000984775	0.0270081	3	6	Up-regulated
Sus_scrofa___TRIM22	7.24215	6.43281	11.8284	0.000986983	0.0270081	3	6	Up-regulated
Sus_scrofa___VWA8	2.52259	7.99281	11.7119	0.000987217	0.0270081	3	6	Up-regulated
Sus_scrofa___SUPT3H	2.57401	8.00257	11.718	0.000987503	0.0270081	3	6	Up-regulated
Sus_scrofa___NCKAP1L	3.46815	7.61897	11.7319	0.000992186	0.0270801	3	6	Up-regulated
Sus_scrofa___ANKIB1	2.79729	8.06151	11.6947	0.00099495	0.0270996	3	6	Up-regulated
Sus_scrofa___STX7	3.00423	7.50526	11.6756	0.00100321	0.0272684	3	6	Up-regulated
Sus_scrofa___DENND1A	2.29913	9.30336	11.7269	0.00101204	0.0273957	3	6	Up-regulated
Sus_scrofa___ITM2B	3.02554	7.93046	11.6245	0.00101785	0.0274426	3	6	Up-regulated
Sus_scrofa___ABL2	2.55691	7.9422	11.646	0.00102085	0.0274651	3	6	Up-regulated
Sus_scrofa___XPO1	2.70778	8.08536	11.6287	0.0010264	0.0275315	3	6	Up-regulated
Sus_scrofa___ACTR3	2.35521	8.39132	11.6489	0.00102832	0.0275315	3	6	Up-regulated
Sus_scrofa___TNFAIP3	4.12136	7.29559	11.7217	0.00102957	0.0275315	3	6	Up-regulated
Sus_scrofa___TEC	6.69662	6.63469	11.7477	0.0010344	0.027605	3	6	Up-regulated
Sus_scrofa___BANK1	2.81287	9.04964	11.6011	0.0010413	0.0277331	3	6	Up-regulated
Sus_scrofa___PML	2.81124	7.91846	11.5875	0.001049	0.0278109	3	6	Up-regulated
Sus_scrofa___CALCRL	2.72801	8.11936	11.5641	0.00104969	0.0278109	3	6	Up-regulated
Sus_scrofa___STX11	2.81462	7.33508	11.542	0.00105054	0.0278109	3	6	Up-regulated
Sus_scrofa___SH3PXD2B	2.54782	8.29537	11.5609	0.00106234	0.028067	3	6	Up-regulated
Sus_scrofa___HMGN3	6.64376	6.51977	11.6858	0.00106555	0.0280957	3	6	Up-regulated
Sus_scrofa___RLIM	6.62498	6.54431	11.6693	0.00107827	0.0283381	3	6	Up-regulated
Sus_scrofa___SLC35A5	6.58371	6.57361	11.6567	0.00107904	0.0283381	3	6	Up-regulated
Sus_scrofa___PTAFR	7.03078	6.64055	11.6178	0.00109508	0.0286456	3	6	Up-regulated
Sus_scrofa___ENSSSCG00000007617	3.39475	7.2254	11.5216	0.00110145	0.0287553	3	6	Up-regulated
Sus_scrofa___TRANK1	3.21307	7.82639	11.4823	0.00110504	0.0287921	3	6	Up-regulated
Sus_scrofa___DHX9	2.62359	8.25992	11.4665	0.00110781	0.0288073	3	6	Up-regulated
Sus_scrofa___NAV3	3.45628	8.10735	11.4527	0.00112756	0.0292633	3	6	Up-regulated
Sus_scrofa___ZFP64	6.5688	6.34625	11.5494	0.00113249	0.0293337	3	6	Up-regulated
Sus_scrofa___EXOC6B	2.03303	9.92862	11.496	0.00113671	0.0293855	3	6	Up-regulated
Sus_scrofa___FAM168B	3.78834	7.40961	11.5121	0.00114158	0.0294536	3	6	Up-regulated
Sus_scrofa___ENSSSCG00000010440	2.64809	8.38718	11.3845	0.001151	0.0296388	3	6	Up-regulated
Sus_scrofa___ORC4	2.69193	7.7498	11.378	0.0011544	0.0296685	3	6	Up-regulated
Sus_scrofa___VSIR	6.89598	6.2382	11.4854	0.00116525	0.0298891	3	6	Up-regulated
Sus_scrofa___SNX30	3.43752	8.27734	11.3828	0.00117563	0.0300171	3	6	Up-regulated
Sus_scrofa___PDZD8	3.76653	7.66779	11.4421	0.00118092	0.0300171	3	6	Up-regulated
Sus_scrofa___FCHO2	2.34092	9.26877	11.385	0.00118161	0.0300171	3	6	Up-regulated
Sus_scrofa___CHPT1	6.81169	7.13471	11.4539	0.00118342	0.0300171	3	6	Up-regulated
Sus_scrofa___MKLN1	2.1388	8.99765	11.3841	0.00118487	0.0300171	3	6	Up-regulated
Sus_scrofa___UBE3A	2.36262	8.58729	11.3463	0.00118764	0.0300171	3	6	Up-regulated
Sus_scrofa___ENSSSCG00000001341	2.8558	8.11388	11.3134	0.00118987	0.0300171	3	6	Up-regulated
Sus_scrofa___PTPDC1	6.64428	7.04245	11.473	0.00119069	0.0300171	3	6	Up-regulated
Sus_scrofa___LRRK1	3.16474	7.65954	11.2901	0.00119797	0.0300449	3	6	Up-regulated
Sus_scrofa___MBOAT1	4.0526	7.86911	11.4083	0.00119822	0.0300449	3	6	Up-regulated
Sus_scrofa___SEC11A	3.8141	7.09907	11.4012	0.00119861	0.0300449	3	6	Up-regulated
Sus_scrofa___VAV1	3.14006	7.94757	11.2821	0.00120173	0.030066	3	6	Up-regulated
Sus_scrofa___GABPA	6.48202	6.75438	11.4328	0.00121015	0.0302195	3	6	Up-regulated
Sus_scrofa___KPNB1	4.08615	7.39777	11.3742	0.00121587	0.0302307	3	6	Up-regulated
Sus_scrofa___CSGALNACT2	3.92333	7.19538	11.3544	0.00121695	0.0302307	3	6	Up-regulated
Sus_scrofa___RB1	2.66333	7.9467	11.2648	0.00121746	0.0302307	3	6	Up-regulated
Sus_scrofa___GNB4	4.16893	7.53405	11.3439	0.00122306	0.0302839	3	6	Up-regulated
Sus_scrofa___USP10	3.83788	7.43538	11.3502	0.00123043	0.0303727	3	6	Up-regulated
Sus_scrofa___TRIM14	6.89568	6.53758	11.3764	0.00123238	0.0303727	3	6	Up-regulated
Sus_scrofa___NRBF2	6.47094	6.31811	11.3429	0.00125039	0.030759	3	6	Up-regulated
Sus_scrofa___MRC1	2.8273	10.374	11.2565	0.0012674	0.03102	3	6	Up-regulated
Sus_scrofa___SZRD1	3.76293	6.72375	11.2672	0.00126914	0.03102	3	6	Up-regulated
Sus_scrofa___OSBPL1A	2.23153	8.68645	11.2085	0.00127226	0.03102	3	6	Up-regulated
Sus_scrofa___MFSD8	3.88306	6.98482	11.2673	0.00127424	0.03102	3	6	Up-regulated
Sus_scrofa___CMPK2	7.16171	6.43619	11.2471	0.00127847	0.03102	3	6	Up-regulated
Sus_scrofa___MTMR3	2.46095	8.28506	11.1667	0.00127899	0.03102	3	6	Up-regulated
Sus_scrofa___ARSL	6.65697	6.47973	11.2986	0.00127924	0.03102	3	6	Up-regulated
Sus_scrofa___CGAS	4.08537	6.46218	11.2212	0.00127978	0.03102	3	6	Up-regulated
Sus_scrofa___GAK	6.44012	6.35961	11.2646	0.00129353	0.0312167	3	6	Up-regulated
Sus_scrofa___VCAN	2.37795	9.09114	11.1776	0.00129613	0.0312167	3	6	Up-regulated
Sus_scrofa___MFSD11	6.80586	6.79231	11.2727	0.00129745	0.0312167	3	6	Up-regulated
Sus_scrofa___NCOA3	2.29659	9.34196	11.1959	0.00129971	0.0312167	3	6	Up-regulated
Sus_scrofa___CSTB	6.62498	6.38157	11.2394	0.00130238	0.0312241	3	6	Up-regulated
Sus_scrofa___ZDHHC20	2.70638	8.09292	11.1076	0.00131147	0.0313849	3	6	Up-regulated
Sus_scrofa___IKBKB	2.3986	8.34319	11.1094	0.00131824	0.03149	3	6	Up-regulated
Sus_scrofa___MBP	6.80471	6.92966	11.2144	0.00132578	0.031563	3	6	Up-regulated
Sus_scrofa___ZNF644	2.18576	8.80935	11.1304	0.00132608	0.031563	3	6	Up-regulated
Sus_scrofa___BRD7	3.707	7.22426	11.1732	0.00133479	0.0316563	3	6	Up-regulated
Sus_scrofa___DARS1	2.60187	7.72574	11.0609	0.00134024	0.0317286	3	6	Up-regulated
Sus_scrofa___RGS1	7.01016	7.18695	11.2214	0.0013491	0.0318812	3	6	Up-regulated
Sus_scrofa___PSMA6	2.50239	7.93152	11.0394	0.00135772	0.0319833	3	6	Up-regulated
Sus_scrofa___ENSSSCG00000013100	2.9026	8.1678	11.0174	0.00135826	0.0319833	3	6	Up-regulated
Sus_scrofa___YWHAB	3.16982	7.07134	11.064	0.00136165	0.032006	3	6	Up-regulated
Sus_scrofa___ENSSSCG00000001769	3.76446	7.14484	11.1181	0.00136936	0.0320731	3	6	Up-regulated
Sus_scrofa___DPP7	6.71265	6.50387	11.1169	0.00137468	0.0321408	3	6	Up-regulated
Sus_scrofa___IDE	3.18209	7.40337	11.0348	0.00138364	0.032293	3	6	Up-regulated
Sus_scrofa___ARHGAP17	2.3207	9.0983	11.0139	0.00140538	0.0326851	3	6	Up-regulated
Sus_scrofa___TLR2	6.868	7.2861	11.123	0.00142028	0.0329734	3	6	Up-regulated
Sus_scrofa___MED13	2.45952	8.40372	10.9	0.00144728	0.0334825	3	6	Up-regulated
Sus_scrofa___PIK3C2A	2.12326	9.38931	10.9519	0.00145638	0.0336341	3	6	Up-regulated
Sus_scrofa___ARHGAP25	3.15189	7.85029	10.8645	0.0014646	0.0337651	3	6	Up-regulated
Sus_scrofa___RANBP2	2.5574	8.33107	10.8652	0.00147139	0.0338624	3	6	Up-regulated
Sus_scrofa___DERA	3.87813	7.16697	10.9492	0.00147933	0.0338913	3	6	Up-regulated
Sus_scrofa___ENSSSCG00000007080	2.2495	8.15777	10.8728	0.00148027	0.0338913	3	6	Up-regulated
Sus_scrofa___SLC37A1	6.48322	5.94107	10.9348	0.00148034	0.0338913	3	6	Up-regulated
Sus_scrofa___WASHC4	2.45436	8.44423	10.8581	0.00148947	0.0339915	3	6	Up-regulated
Sus_scrofa___TAOK3	3.16229	7.68735	10.879	0.00149152	0.0339915	3	6	Up-regulated
Sus_scrofa___PLIN2	6.50544	6.85391	10.9605	0.00149243	0.0339915	3	6	Up-regulated
Sus_scrofa___PLAUR	3.1948	6.95016	10.8197	0.00152258	0.0345886	3	6	Up-regulated
Sus_scrofa___CEMIP2	2.56776	7.99512	10.7819	0.00152389	0.0345886	3	6	Up-regulated
Sus_scrofa___STK17B	2.80777	7.87175	10.7635	0.00152929	0.0346516	3	6	Up-regulated
Sus_scrofa___CUL1	2.50146	8.01488	10.7664	0.00154146	0.0348676	3	6	Up-regulated
Sus_scrofa___MLLT10	2.05807	9.07596	10.8082	0.00155101	0.0350237	3	6	Up-regulated
Sus_scrofa___ENSSSCG00000030801	6.64667	6.43371	10.8539	0.00157127	0.0354207	3	6	Up-regulated
Sus_scrofa___H3-5	2.68162	8.10132	10.7167	0.00157818	0.0355159	3	6	Up-regulated
Sus_scrofa___NFX1	2.78449	7.6468	10.7131	0.00158851	0.0356874	3	6	Up-regulated
Sus_scrofa___DIP2B	2.0835	9.61049	10.7477	0.00160403	0.0359655	3	6	Up-regulated
Sus_scrofa___KDM2A	2.04121	9.36575	10.7449	0.00160633	0.0359655	3	6	Up-regulated
Sus_scrofa___CCT4	6.42278	6.46026	10.7991	0.0016097	0.03598	3	6	Up-regulated
Sus_scrofa___ARNTL	2.68192	8.27782	10.665	0.00161716	0.0360248	3	6	Up-regulated
Sus_scrofa___MAPK1	2.77814	7.89078	10.6745	0.00161716	0.0360248	3	6	Up-regulated
Sus_scrofa___GNG10	3.69827	6.67243	10.7267	0.0016248	0.0360993	3	6	Up-regulated
Sus_scrofa___FUT8	2.42594	8.65581	10.6658	0.00162871	0.0360993	3	6	Up-regulated
Sus_scrofa___PRKDC	3.63634	7.25496	10.7386	0.0016343	0.0360993	3	6	Up-regulated
Sus_scrofa___ENSSSCG00000037466	6.78369	6.45335	10.7505	0.00163582	0.0360993	3	6	Up-regulated
Sus_scrofa___GSR	2.98665	7.38041	10.645	0.0016369	0.0360993	3	6	Up-regulated
Sus_scrofa___RNGTT	2.60766	8.08235	10.6265	0.00164729	0.0362679	3	6	Up-regulated
Sus_scrofa___NCOR2	2.0904	8.81668	10.6379	0.00166479	0.0365922	3	6	Up-regulated
Sus_scrofa___UST	2.33964	8.35601	10.5971	0.00167593	0.0367687	3	6	Up-regulated
Sus_scrofa___ENSSSCG00000022236	6.78185	6.72854	10.7081	0.00167839	0.0367687	3	6	Up-regulated
Sus_scrofa___GSTCD	6.68034	6.24738	10.6938	0.00168144	0.0367746	3	6	Up-regulated
Sus_scrofa___UBTD2	2.77868	7.3839	10.5828	0.00168487	0.0367879	3	6	Up-regulated
Sus_scrofa___LAP3	6.49142	6.85285	10.7106	0.00168906	0.0367879	3	6	Up-regulated
Sus_scrofa___SLC38A9	3.20932	7.70142	10.6113	0.00169285	0.0367879	3	6	Up-regulated
Sus_scrofa___RHOA	2.21726	9.43058	10.6207	0.00169319	0.0367879	3	6	Up-regulated
Sus_scrofa___TTF2	6.67368	6.64781	10.6922	0.00169732	0.0368172	3	6	Up-regulated
Sus_scrofa___RFC1	6.50772	7.11768	10.698	0.00170026	0.0368205	3	6	Up-regulated
Sus_scrofa___BTF3	6.41582	6.02641	10.6352	0.00170785	0.0369079	3	6	Up-regulated
Sus_scrofa___TCF7L2	2.25712	8.74515	10.5898	0.00170989	0.0369079	3	6	Up-regulated
Sus_scrofa___MGA	2.63368	7.98504	10.5426	0.00171456	0.0369465	3	6	Up-regulated
Sus_scrofa___SAFB	2.58589	7.89168	10.5368	0.00171815	0.0369465	3	6	Up-regulated
Sus_scrofa___DAGLB	2.55614	7.41293	10.5252	0.00172354	0.0369465	3	6	Up-regulated
Sus_scrofa___PHKB	2.24626	8.23288	10.549	0.00172395	0.0369465	3	6	Up-regulated
Sus_scrofa___NEK6	2.82334	7.3484	10.5277	0.00172566	0.0369465	3	6	Up-regulated
Sus_scrofa___MTAP	6.64976	6.22008	10.5869	0.00175677	0.0375517	3	6	Up-regulated
Sus_scrofa___GNB1	2.24041	8.38596	10.5038	0.00176371	0.0376392	3	6	Up-regulated
Sus_scrofa___SEC24B	3.029	7.63399	10.5151	0.00177173	0.0377054	3	6	Up-regulated
Sus_scrofa___XPC	3.65683	7.05365	10.5649	0.00177252	0.0377054	3	6	Up-regulated
Sus_scrofa___KLHL36	6.33323	6.06953	10.5476	0.00179208	0.0379993	3	6	Up-regulated
Sus_scrofa___UBE2D3	3.62027	7.46359	10.5424	0.00179371	0.0379993	3	6	Up-regulated
Sus_scrofa___USP3	2.18217	8.51764	10.4718	0.00179497	0.0379993	3	6	Up-regulated
Sus_scrofa___RHOQ	2.26838	8.19758	10.4559	0.00180724	0.0381915	3	6	Up-regulated
Sus_scrofa___VRK3	2.45491	7.7305	10.4256	0.00181219	0.0381915	3	6	Up-regulated
Sus_scrofa___SLC43A2	3.78013	7.1601	10.5047	0.00181755	0.0381915	3	6	Up-regulated
Sus_scrofa___RHOH	6.97943	7.18328	10.5577	0.00181781	0.0381915	3	6	Up-regulated
Sus_scrofa___HSD11B1	6.52204	6.91224	10.5294	0.00181851	0.0381915	3	6	Up-regulated
Sus_scrofa___DROSHA	6.43275	6.72043	10.5286	0.00183676	0.0384785	3	6	Up-regulated
Sus_scrofa___LRRK2	2.68606	8.03093	10.3915	0.00183799	0.0384785	3	6	Up-regulated
Sus_scrofa___ACAP2	2.10951	9.13881	10.4319	0.00185029	0.0386746	3	6	Up-regulated
Sus_scrofa___ENSSSCG00000038960	6.3809	6.52528	10.4976	0.00185682	0.0387399	3	6	Up-regulated
Sus_scrofa___IQGAP1	2.37506	9.06995	10.3994	0.00186163	0.0387399	3	6	Up-regulated
Sus_scrofa___INTS8	6.30397	6.86301	10.5011	0.00186221	0.0387399	3	6	Up-regulated
Sus_scrofa___TLK2	2.19499	8.47592	10.3834	0.00187305	0.0387494	3	6	Up-regulated
Sus_scrofa___UBE3D	6.54773	6.27801	10.4464	0.00187534	0.0387494	3	6	Up-regulated
Sus_scrofa___DNAJC13	2.24672	8.25923	10.3782	0.00187747	0.0387494	3	6	Up-regulated
Sus_scrofa___ACSL4	2.94372	7.85137	10.3588	0.00187886	0.0387494	3	6	Up-regulated
Sus_scrofa___RASA2	2.15285	9.06023	10.4001	0.00188027	0.0387494	3	6	Up-regulated
Sus_scrofa___RPL6	6.33902	6.56541	10.4449	0.00189396	0.0389679	3	6	Up-regulated
Sus_scrofa___MACROD2	2.25863	8.54687	10.3557	0.00190283	0.0389679	3	6	Up-regulated
Sus_scrofa___SLC46A3	6.45669	6.89584	10.4342	0.00190369	0.0389679	3	6	Up-regulated
Sus_scrofa___ENSSSCG00000005453	6.6382	6.29889	10.407	0.00190571	0.0389679	3	6	Up-regulated
Sus_scrofa___UBR5	2.05177	8.97591	10.3583	0.00190857	0.0389679	3	6	Up-regulated
Sus_scrofa___ENSSSCG00000006206	2.76299	8.44767	10.3135	0.00191253	0.0389884	3	6	Up-regulated
Sus_scrofa___BIN3	6.45669	6.71767	10.4334	0.00191811	0.0390142	3	6	Up-regulated
Sus_scrofa___SND1	2.18927	8.71502	10.3246	0.0019225	0.0390142	3	6	Up-regulated
Sus_scrofa___VCAM1	6.78023	6.35312	10.3916	0.00192265	0.0390142	3	6	Up-regulated
Sus_scrofa___TICAM1	6.40888	5.71983	10.3588	0.00192935	0.0390901	3	6	Up-regulated
Sus_scrofa___FNIP2	2.52711	7.99906	10.2535	0.00196752	0.0397635	3	6	Up-regulated
Sus_scrofa___MAPRE1	6.49142	6.60597	10.3746	0.00196861	0.0397635	3	6	Up-regulated
Sus_scrofa___PRKD3	2.45538	8.37093	10.2493	0.00197888	0.0398519	3	6	Up-regulated
Sus_scrofa___NARS1	6.38713	6.53612	10.3548	0.00197902	0.0398519	3	6	Up-regulated
Sus_scrofa___DCTN4	2.46388	7.85384	10.2318	0.00198834	0.0399561	3	6	Up-regulated
Sus_scrofa___PIKFYVE	3.69654	7.61266	10.3175	0.00199149	0.0399561	3	6	Up-regulated
Sus_scrofa___PKD2	2.65552	7.01887	10.2258	0.00199721	0.0399561	3	6	Up-regulated
Sus_scrofa___PXK	2.5919	8.13667	10.2264	0.00199737	0.0399561	3	6	Up-regulated
Sus_scrofa___PTPN23	6.34594	6.7411	10.3469	0.00199932	0.0399561	3	6	Up-regulated
Sus_scrofa___FOXS1	3.95169	6.53722	10.2679	0.00200676	0.0400442	3	6	Up-regulated
Sus_scrofa___PLBD2	6.4426	6.21265	10.2941	0.0020141	0.0401007	3	6	Up-regulated
Sus_scrofa___ICE2	3.03265	7.0838	10.2318	0.00202336	0.0401119	3	6	Up-regulated
Sus_scrofa___ENSSSCG00000011162	2.08623	8.6197	10.2233	0.00202882	0.0401119	3	6	Up-regulated
Sus_scrofa___CD47	2.80552	7.87079	10.1986	0.00202947	0.0401119	3	6	Up-regulated
Sus_scrofa___ENSSSCG00000044127	3.07828	7.36634	10.2184	0.00203398	0.0401119	3	6	Up-regulated
Sus_scrofa___TMEM260	2.73663	7.33981	10.1925	0.00203444	0.0401119	3	6	Up-regulated
Sus_scrofa___LRBA	2.56977	8.49305	10.1736	0.0020455	0.0402699	3	6	Up-regulated
Sus_scrofa___PKD1	6.33323	6.73811	10.2812	0.00205698	0.0404356	3	6	Up-regulated
Sus_scrofa___IPO7	2.77469	7.68306	10.1597	0.00206847	0.0405983	3	6	Up-regulated
Sus_scrofa___LCOR	2.17625	8.76507	10.1907	0.00207141	0.0405983	3	6	Up-regulated
Sus_scrofa___MYO9B	2.26973	8.50603	10.1676	0.0020778	0.0406633	3	6	Up-regulated
Sus_scrofa___DNAJC16	6.41565	6.48877	10.236	0.00209303	0.0409008	3	6	Up-regulated
Sus_scrofa___UBE2D2	2.2599	8.39963	10.1133	0.00211796	0.0411512	3	6	Up-regulated
Sus_scrofa___LMBRD1	3.63022	6.98102	10.1773	0.00211922	0.0411512	3	6	Up-regulated
Sus_scrofa___XIAP	2.84498	7.61012	10.1075	0.00211979	0.0411512	3	6	Up-regulated
pCMV_____gp50	6.83199	5.18787	10.3658	0.00212039	0.0411512	3	6	Up-regulated
Sus_scrofa___ASXL2	2.40174	8.39037	10.102	0.00212142	0.0411512	3	6	Up-regulated
Sus_scrofa___HTR7	2.73838	8.42081	10.1299	0.00212754	0.0411909	3	6	Up-regulated
Sus_scrofa___PSMD1	2.5056	8.12315	10.0872	0.00213235	0.0411909	3	6	Up-regulated
Sus_scrofa___LARP4	2.13336	8.16567	10.1095	0.00213585	0.0411909	3	6	Up-regulated
Sus_scrofa___LGMN	2.59039	7.97245	10.0694	0.0021369	0.0411909	3	6	Up-regulated
Sus_scrofa___C1QC	6.99868	7.00198	10.2346	0.00213906	0.0411909	3	6	Up-regulated
Sus_scrofa___ENSSSCG00000003520	2.03884	8.50808	10.106	0.00214402	0.0412264	3	6	Up-regulated
Sus_scrofa___ENSSSCG00000021815	6.49036	6.05648	10.1464	0.00214771	0.0412373	3	6	Up-regulated
Sus_scrofa___ARHGAP15	2.58656	9.90441	10.086	0.00217108	0.0416255	3	6	Up-regulated
Sus_scrofa___NSD1	2.21804	8.63444	10.0735	0.00217735	0.0416851	3	6	Up-regulated
Sus_scrofa___TBC1D1	2.11362	9.44832	10.0777	0.00220348	0.0421244	3	6	Up-regulated
Sus_scrofa___OGDH	1.96782	8.48411	10.0475	0.00221821	0.0423448	3	6	Up-regulated
Sus_scrofa___RYBP	2.59158	7.91383	9.98597	0.00223814	0.0425568	3	6	Up-regulated
Sus_scrofa___C1QA	6.926	6.98084	10.106	0.00223896	0.0425568	3	6	Up-regulated
Sus_scrofa___GMDS	3.77116	7.62388	10.0699	0.00223898	0.0425568	3	6	Up-regulated
Sus_scrofa___QRICH1	3.02081	7.62088	10.0164	0.00224343	0.04258	3	6	Up-regulated
Sus_scrofa___ETNK1	2.73149	7.68574	9.93706	0.00228743	0.0433529	3	6	Up-regulated
Sus_scrofa___RCSD1	2.69254	8.77947	9.93342	0.00230657	0.0435905	3	6	Up-regulated
Sus_scrofa___PHF8	6.29004	7.00786	10.0441	0.00231152	0.0436216	3	6	Up-regulated
Sus_scrofa___PGD	3.0485	6.97034	9.9389	0.00231519	0.0436285	3	6	Up-regulated
Sus_scrofa___PDS5B	2.3819	8.34363	9.90738	0.00233137	0.043871	3	6	Up-regulated
Sus_scrofa___SLC6A6	3.65754	6.72945	9.93241	0.00235065	0.0441709	3	6	Up-regulated
Sus_scrofa___CDS2	3.59435	7.31318	9.95202	0.00236878	0.0442513	3	6	Up-regulated
Sus_scrofa___ENSSSCG00000014565	3.80041	6.73279	9.93535	0.00237625	0.0442513	3	6	Up-regulated
Sus_scrofa___LMBRD2	6.42983	6.3254	9.96532	0.00237761	0.0442513	3	6	Up-regulated
Sus_scrofa___SNAP47	6.41971	6.87048	9.97199	0.00238563	0.0442513	3	6	Up-regulated
Sus_scrofa___ARL8B	2.94452	7.833	9.88515	0.00239144	0.0442513	3	6	Up-regulated
Sus_scrofa___AXL	6.49036	6.44517	9.94108	0.00239243	0.0442513	3	6	Up-regulated
Sus_scrofa___ADGRA3	2.81904	7.32315	9.85257	0.00239423	0.0442513	3	6	Up-regulated
Sus_scrofa___PSMB8	6.62726	6.09718	9.92898	0.00239542	0.0442513	3	6	Up-regulated
Sus_scrofa___SEPTIN2	6.32615	6.78701	9.96256	0.00239682	0.0442513	3	6	Up-regulated
Sus_scrofa___FUS	2.78845	7.98307	9.85267	0.00239692	0.0442513	3	6	Up-regulated
Sus_scrofa___CLIP1	2.02915	8.60963	9.88143	0.00240575	0.0442513	3	6	Up-regulated
Sus_scrofa___PUM2	1.94885	9.48221	9.89669	0.00240598	0.0442513	3	6	Up-regulated
Sus_scrofa___DPH6	2.5163	7.55526	9.8346	0.00240654	0.0442513	3	6	Up-regulated
Sus_scrofa___TIMD4	6.7029	5.66511	9.87931	0.00241683	0.0442513	3	6	Up-regulated
Sus_scrofa___FBXL5	3.5159	7.19384	9.90694	0.00241868	0.0442513	3	6	Up-regulated
Sus_scrofa___TLN1	3.55257	7.05445	9.90173	0.00242094	0.0442513	3	6	Up-regulated
Sus_scrofa___RAB32	2.45201	8.01937	9.82276	0.00242181	0.0442513	3	6	Up-regulated
Sus_scrofa___CCDC170	3.71782	7.21623	9.88571	0.00242513	0.0442513	3	6	Up-regulated
Sus_scrofa___RPL28	3.86529	6.79097	9.88387	0.00242521	0.0442513	3	6	Up-regulated
Sus_scrofa___MARCKS	4.10839	7.04413	9.92113	0.00242989	0.0442743	3	6	Up-regulated
Sus_scrofa___BLNK	2.65863	8.34902	9.79707	0.00243666	0.0443188	3	6	Up-regulated
Sus_scrofa___TRPS1	2.23016	9.89598	9.86391	0.00243904	0.0443188	3	6	Up-regulated
Sus_scrofa___UBE2K	2.164	8.42712	9.82729	0.00244545	0.0443489	3	6	Up-regulated
Sus_scrofa___NCF4	3.85965	7.63179	9.88405	0.00244742	0.0443489	3	6	Up-regulated
Sus_scrofa___TIAL1	2.63194	7.58511	9.80079	0.00245611	0.0444162	3	6	Up-regulated
Sus_scrofa___DPY19L1	2.15132	8.634	9.81111	0.00246837	0.0445452	3	6	Up-regulated
Sus_scrofa___DDX55	6.36816	6.54071	9.87848	0.00248271	0.0446287	3	6	Up-regulated
Sus_scrofa___NCK2	2.59408	7.82063	9.76661	0.00248622	0.0446287	3	6	Up-regulated
Sus_scrofa___GP91-PHOX	6.83347	7.41703	9.87238	0.00248976	0.0446287	3	6	Up-regulated
Sus_scrofa___LUC7L3	2.20585	8.84193	9.76471	0.00250211	0.0447331	3	6	Up-regulated
Sus_scrofa___NCOA2	2.01788	9.58917	9.78773	0.00252487	0.0450723	3	6	Up-regulated
Sus_scrofa___ENSSSCG00000034976	6.47195	5.94526	9.80417	0.00253053	0.0451044	3	6	Up-regulated
Sus_scrofa___TMEM241	6.30397	6.5397	9.8286	0.00253349	0.0451044	3	6	Up-regulated
Sus_scrofa___ARHGAP24	2.32222	10.4576	9.76728	0.00256239	0.0455522	3	6	Up-regulated
Sus_scrofa___TENT5A	3.42121	7.30357	9.73414	0.00256881	0.0455522	3	6	Up-regulated
Sus_scrofa___MYL12A	3.01715	7.21455	9.73059	0.00256899	0.0455522	3	6	Up-regulated
Sus_scrofa___SLF1	6.30115	6.74555	9.80011	0.00257593	0.045614	3	6	Up-regulated
Sus_scrofa___ARHGAP30	6.43514	6.71299	9.78199	0.00258521	0.045717	3	6	Up-regulated
Sus_scrofa___SLC8B1	3.7043	6.99226	9.73529	0.00259183	0.0457729	3	6	Up-regulated
Sus_scrofa___ZNF710	2.21146	8.97552	9.71276	0.00260333	0.0459146	3	6	Up-regulated
Sus_scrofa___ANKS1A	2.01277	9.15576	9.70096	0.00263154	0.0463502	3	6	Up-regulated
Sus_scrofa___SOCS4	6.26362	6.13979	9.71406	0.00265863	0.046765	3	6	Up-regulated
Sus_scrofa___CABIN1	6.52381	6.53135	9.72841	0.00266381	0.0467937	3	6	Up-regulated
Sus_scrofa___KDM7A	2.27155	8.20462	9.62149	0.0026745	0.0468512	3	6	Up-regulated
Sus_scrofa___PATL1	3.49044	6.85068	9.68941	0.00267629	0.0468512	3	6	Up-regulated
Sus_scrofa___EED	6.15517	6.56659	9.71882	0.0026785	0.0468512	3	6	Up-regulated
Sus_scrofa___RPS9	3.73335	7.2899	9.69092	0.00268195	0.0468512	3	6	Up-regulated
Sus_scrofa___ZMYND11	2.2153	8.19047	9.62458	0.00268481	0.0468512	3	6	Up-regulated
Sus_scrofa___CHIC2	2.56271	7.88994	9.59661	0.00270028	0.0469552	3	6	Up-regulated
Sus_scrofa___USP42	6.12873	6.34392	9.69515	0.00270144	0.0469552	3	6	Up-regulated
Sus_scrofa___UBE2H	1.88057	9.36378	9.64823	0.00271313	0.0470965	3	6	Up-regulated
Sus_scrofa___ATP6V1H	3.51031	6.83097	9.65478	0.00271947	0.0471446	3	6	Up-regulated
Sus_scrofa___ADGRG6	2.3548	7.62416	9.57769	0.00272644	0.04715	3	6	Up-regulated
Sus_scrofa___KCTD20	2.7356	7.52389	9.58481	0.00272692	0.04715	3	6	Up-regulated
Sus_scrofa___ENSSSCG00000039894	2.42191	8.03281	9.56943	0.0027338	0.0472072	3	6	Up-regulated
Sus_scrofa___PKN2	2.16229	8.57936	9.57445	0.00275329	0.0474817	3	6	Up-regulated
Sus_scrofa___ADORA3	6.61325	6.13502	9.6586	0.0027603	0.04749	3	6	Up-regulated
Sus_scrofa___TENT5C	6.55894	6.2748	9.64199	0.00276096	0.04749	3	6	Up-regulated
Sus_scrofa___ACTR2	2.85335	7.50864	9.55544	0.00276472	0.0474929	3	6	Up-regulated
Sus_scrofa___GHSR	2.57583	7.83191	9.54504	0.00276926	0.0475089	3	6	Up-regulated
Sus_scrofa___PBRM1	2.11054	8.50232	9.56911	0.00277968	0.047626	3	6	Up-regulated
Sus_scrofa___XPO5	6.24691	6.46441	9.62202	0.00278746	0.0476406	3	6	Up-regulated
Sus_scrofa___LAPTM5	6.8069	7.01235	9.67411	0.00278775	0.0476406	3	6	Up-regulated
Sus_scrofa___BZW1	2.41653	7.9428	9.50285	0.00282675	0.0481689	3	6	Up-regulated
Sus_scrofa___MINDY2	2.63168	7.27013	9.50765	0.0028296	0.0481689	3	6	Up-regulated
Sus_scrofa___CAPRIN1	2.5031	7.8997	9.4917	0.00284222	0.0483214	3	6	Up-regulated
Sus_scrofa___SPPL3	2.01275	8.75921	9.525	0.00285197	0.0484248	3	6	Up-regulated
Sus_scrofa___USP37	2.97637	7.69511	9.50931	0.00286384	0.0485463	3	6	Up-regulated
Sus_scrofa___NFKB1	2.19174	8.11565	9.47953	0.00286648	0.0485463	3	6	Up-regulated
Sus_scrofa___ZFAND3	1.85096	9.93346	9.52561	0.00288202	0.0486125	3	6	Up-regulated
Sus_scrofa___BRAF	1.9638	8.63012	9.49129	0.00288639	0.0486125	3	6	Up-regulated
Sus_scrofa___TBCA	3.54888	7.32462	9.53729	0.00288674	0.0486125	3	6	Up-regulated
Sus_scrofa___MALT1	2.32305	7.7395	9.45303	0.00289208	0.0486125	3	6	Up-regulated
Sus_scrofa___ABCG1	6.39195	5.94847	9.53357	0.00289702	0.0486125	3	6	Up-regulated
Sus_scrofa___CCND3	2.66758	9.06421	9.46283	0.00289808	0.0486125	3	6	Up-regulated
Sus_scrofa___DEGS1	3.69759	6.61044	9.4929	0.00289929	0.0486125	3	6	Up-regulated
Sus_scrofa___CREBZF	2.95606	7.38189	9.48144	0.00289982	0.0486125	3	6	Up-regulated
Sus_scrofa___USP8	2.28462	7.84212	9.44186	0.00291804	0.0488559	3	6	Up-regulated
Sus_scrofa___ATXN3L	3.51133	6.88525	9.49602	0.00293607	0.0490955	3	6	Up-regulated
Sus_scrofa___SHC3	2.91608	7.46739	9.4141	0.00294407	0.0491671	3	6	Up-regulated
Sus_scrofa___ID2	6.41565	5.95148	9.47903	0.00294933	0.0491928	3	6	Up-regulated
Sus_scrofa___RBM39	2.12926	8.76574	9.42968	0.00295914	0.0492942	3	6	Up-regulated
Sus_scrofa___STXBP1	3.20394	7.59419	9.42706	0.0029727	0.0493954	3	6	Up-regulated
Sus_scrofa___NLRC5	2.56772	8.10666	9.3988	0.00297919	0.0494411	3	6	Up-regulated
Sus_scrofa___GALK2	2.32384	7.9077	9.3899	0.00298617	0.0494947	3	6	Up-regulated
Sus_scrofa___BCL2A1	6.45179	5.51207	9.45425	0.00299008	0.0494975	3	6	Up-regulated
Sus_scrofa___TPCN1	3.60706	6.85039	9.44356	0.00300436	0.049624	3	6	Up-regulated
Sus_scrofa___AP1B1	2.66289	7.93759	9.37552	0.00300524	0.049624	3	6	Up-regulated
Sus_scrofa___ZFAND6	2.51314	7.78836	9.3701	0.00301511	0.0497248	3	6	Up-regulated
Sus_scrofa___QKI	1.85353	10.4258	9.43098	0.00302249	0.0497379	3	6	Up-regulated
Sus_scrofa___ARRDC3	2.77625	7.38614	9.3703	0.00302343	0.0497379	3	6	Up-regulated
Sus_scrofa___IP6K1	2.34253	8.21413	9.36351	0.00303184	0.0498142	3	6	Up-regulated
Sus_scrofa___MYH6	-6.66344	7.58861	33.1412	1.69658e-07	0.000390888	3	6	Down-regulated
Sus_scrofa___GALNT13	-8.51056	6.40605	29.2179	7.35055e-07	0.000746929	3	6	Down-regulated
Sus_scrofa___ACTC1	-8.06634	6.77917	22.7501	8.74264e-06	0.00255764	3	6	Down-regulated
Sus_scrofa___COL23A1	-8.06324	6.45409	20.9208	1.86683e-05	0.00328811	3	6	Down-regulated
Sus_scrofa___ENSSSCG00000035789	-9.36105	8.30611	20.4723	2.36459e-05	0.00371859	3	6	Down-regulated
Sus_scrofa___RGS6	-5.21174	7.97679	18.5784	4.91697e-05	0.0055081	3	6	Down-regulated
Sus_scrofa___KIAA1549L	-5.49275	6.16767	18.0136	5.80186e-05	0.00602555	3	6	Down-regulated
Sus_scrofa___ENSSSCG00000015795	-7.46397	5.51055	18.1815	5.81437e-05	0.00602555	3	6	Down-regulated
Sus_scrofa___CMTM5	-7.18058	5.84222	17.9409	6.30742e-05	0.0062585	3	6	Down-regulated
Sus_scrofa___ENSSSCG00000010626	-3.63229	9.99195	18.0499	6.42818e-05	0.0062585	3	6	Down-regulated
Sus_scrofa___TENM2	-4.75319	8.37567	17.791	6.86378e-05	0.0062585	3	6	Down-regulated
Sus_scrofa___GADL1	-7.62976	5.70815	17.2753	8.5761e-05	0.00701097	3	6	Down-regulated
Sus_scrofa___RNF180	-4.2811	7.63302	16.6269	0.000111839	0.00829994	3	6	Down-regulated
Sus_scrofa___ENSSSCG00000012700	-6.71847	5.9569	16.1121	0.000134286	0.00938581	3	6	Down-regulated
Sus_scrofa___SMOC1	-7.01539	6.07419	15.447	0.000184286	0.0110155	3	6	Down-regulated
Sus_scrofa___FHL2	-3.18537	9.73408	14.5799	0.00028432	0.0141198	3	6	Down-regulated
Sus_scrofa___C2CD6	-4.56297	6.59679	13.9468	0.00036084	0.0159421	3	6	Down-regulated
Sus_scrofa___SLCO6A1	-4.03162	7.13497	13.7381	0.000409367	0.0171674	3	6	Down-regulated
Sus_scrofa___PCP4	-4.08848	7.38476	13.5992	0.000412414	0.0172006	3	6	Down-regulated
Sus_scrofa___STXBP5L	-5.03518	6.62019	12.8883	0.000572121	0.0209355	3	6	Down-regulated
Sus_scrofa___CUBN	-4.61046	5.8049	12.7124	0.000605375	0.0213209	3	6	Down-regulated
Sus_scrofa___CFAP300	-6.90258	5.72541	12.5881	0.000668213	0.0227503	3	6	Down-regulated
Sus_scrofa___SLC4A10	-6.79765	5.15396	12.4139	0.000730362	0.0238224	3	6	Down-regulated
Sus_scrofa___ENSSSCG00000036052	-3.81865	8.30793	12.338	0.000755209	0.0240038	3	6	Down-regulated
Sus_scrofa___NEB	-3.62521	6.6256	12.0901	0.000830873	0.025147	3	6	Down-regulated
Sus_scrofa___ELOVL2	-4.47521	5.50759	11.9177	0.000902779	0.0260956	3	6	Down-regulated
Sus_scrofa___LDHC	-7.3816	6.51333	11.9687	0.000906247	0.0261387	3	6	Down-regulated
Sus_scrofa___KIF27	-6.29976	5.76847	11.8374	0.000920034	0.0262498	3	6	Down-regulated
Sus_scrofa___FAM174A	-4.35806	5.86021	11.7779	0.000945795	0.0265264	3	6	Down-regulated
Sus_scrofa___DIO2	-4.45332	5.48075	11.6376	0.00101103	0.0273957	3	6	Down-regulated
Sus_scrofa___DLG2	-3.03115	7.7516	11.7134	0.00101793	0.0274426	3	6	Down-regulated
Sus_scrofa___EFS	-6.58424	5.17603	11.5349	0.00109081	0.0285905	3	6	Down-regulated
Sus_scrofa___CDH18	-4.16056	5.80914	11.2847	0.00118802	0.0300171	3	6	Down-regulated
Sus_scrofa___PKD2L2	-3.89104	5.85525	11.1985	0.0012242	0.0302839	3	6	Down-regulated
Sus_scrofa___NAV2	-2.60137	9.38102	11.2271	0.0012944	0.0312167	3	6	Down-regulated
Sus_scrofa___FRZB	-6.28958	4.96265	11.0599	0.00133341	0.0316563	3	6	Down-regulated
Sus_scrofa___KLHL3	-3.31014	7.01202	11.0648	0.0013666	0.0320653	3	6	Down-regulated
Sus_scrofa___FAM13C	-4.07016	6.24603	10.9633	0.00138826	0.0323438	3	6	Down-regulated
Sus_scrofa___KIAA0319	-6.60047	5.9138	10.9273	0.0014298	0.0331362	3	6	Down-regulated
Sus_scrofa___PDE1A	-3.22717	7.00433	10.6765	0.00162759	0.0360993	3	6	Down-regulated
Sus_scrofa___LRRC9	-6.14212	5.93693	10.3395	0.00187669	0.0387494	3	6	Down-regulated
Sus_scrofa___CAMK2A	-4.30239	7.58283	10.3385	0.00190007	0.0389679	3	6	Down-regulated
Sus_scrofa___MACC1	-4.44968	5.63031	10.1929	0.00201566	0.0401007	3	6	Down-regulated
Sus_scrofa___SLC16A9	-6.18607	5.0509	10.1816	0.00202368	0.0401119	3	6	Down-regulated
Sus_scrofa___AGBL4	-2.93297	7.27773	9.9764	0.00230612	0.0435905	3	6	Down-regulated
Sus_scrofa___GIPC2	-3.08886	7.88791	9.86962	0.00242062	0.0442513	3	6	Down-regulated
Sus_scrofa___ADAMTS19	-5.9328	4.89013	9.81581	0.00242528	0.0442513	3	6	Down-regulated
Sus_scrofa___ENSSSCG00000040253	-6.13241	4.69877	9.88546	0.00245785	0.0444162	3	6	Down-regulated
Sus_scrofa___PPP1R36	-5.88118	5.24273	9.72792	0.0024828	0.0446287	3	6	Down-regulated
Sus_scrofa___GRIA4	-3.55969	5.88254	9.72678	0.00248989	0.0446287	3	6	Down-regulated
Sus_scrofa___MARCHF11	-6.38412	4.83529	9.82207	0.00250248	0.0447331	3	6	Down-regulated
Sus_scrofa___MPPED2	-3.72546	6.66871	9.59956	0.00270074	0.0469552	3	6	Down-regulated
Sus_scrofa___RNF212B	-6.30075	4.81823	9.56732	0.00280333	0.047845	3	6	Down-regulated
Sus_scrofa___MYO1H	-6.38062	5.34617	9.40722	0.00297137	0.0493954	3	6	Down-regulated

## Sheet: vCM1
Gene	logFC	logCPM	F	PValue	FDR	Observations_PCMV/PRV	Observations_3month_protocol	level
Sus_scrofa___UBE2L6	6.11328	1.29915	115.597	4.10436e-13	1.0414e-08	3	7	Up-regulated
Sus_scrofa___FOXS1	8.82387	3.88664	108.094	7.82414e-12	9.92609e-08	3	7	Up-regulated
Sus_scrofa___LGALS1	7.055	0.953824	90.1671	1.70223e-11	1.43969e-07	3	7	Up-regulated
Sus_scrofa___NMI	5.81333	0.259693	79.9203	2.64096e-11	1.67522e-07	3	7	Up-regulated
Sus_scrofa___MX2	10.8895	3.92397	112.292	3.8456e-11	1.95149e-07	3	7	Up-regulated
Sus_scrofa___RSAD2	8.86899	4.435	94.5164	1.35802e-10	5.74286e-07	3	7	Up-regulated
Sus_scrofa___BST2	9.22765	2.15503	90.3703	8.91934e-10	3.23301e-06	3	7	Up-regulated
Sus_scrofa___HLA-DOB	4.89399	-0.211541	58.0241	1.74002e-09	5.51868e-06	3	7	Up-regulated
Sus_scrofa___HERC5	5.83942	4.3708	73.0162	5.81778e-09	1.64016e-05	3	7	Up-regulated
Sus_scrofa___ANO6	6.06015	4.64136	69.178	1.04521e-08	2.5914e-05	3	7	Up-regulated
Sus_scrofa___MX1	7.27591	4.98914	64.0262	1.217e-08	2.5914e-05	3	7	Up-regulated
Sus_scrofa___ENSSSCG00000001229	5.29415	4.12198	59.207	1.22559e-08	2.5914e-05	3	7	Up-regulated
Sus_scrofa___SETX	2.7102	5.88413	65.3839	1.62895e-08	3.17933e-05	3	7	Up-regulated
Sus_scrofa___ENSSSCG00000025593	5.13919	0.479897	49.4724	1.97817e-08	3.58515e-05	3	7	Up-regulated
Sus_scrofa___ENSSSCG00000045769	4.92021	2.37406	61.353	2.7928e-08	4.72412e-05	3	7	Up-regulated
Sus_scrofa___ETV7	4.69412	-0.244681	49.6218	3.29418e-08	5.22395e-05	3	7	Up-regulated
Sus_scrofa___TSPAN14	3.92357	-0.523126	47.0621	3.74388e-08	5.58786e-05	3	7	Up-regulated
Sus_scrofa___PARP3	2.37193	4.31263	58.2127	4.76125e-08	6.52815e-05	3	7	Up-regulated
Sus_scrofa___H2BC21	3.11356	2.14925	58.1064	4.88846e-08	6.52815e-05	3	7	Up-regulated
Sus_scrofa___IFIT1	5.89839	5.01484	55.0967	6.08435e-08	7.71891e-05	3	7	Up-regulated
Sus_scrofa___AFF2	3.39364	2.80985	52.5102	1.10491e-07	0.0001335	3	7	Up-regulated
Sus_scrofa___LIMK1	2.01886	3.47605	52.2301	1.25456e-07	0.000140924	3	7	Up-regulated
Sus_scrofa___FBXO39	2.68134	6.30414	52.0444	1.27744e-07	0.000140924	3	7	Up-regulated
Sus_scrofa___F2RL1	3.37363	0.47878	47.0111	1.43445e-07	0.000151651	3	7	Up-regulated
Sus_scrofa___HTATIP2	2.00425	3.63998	50.6752	1.62301e-07	0.000160766	3	7	Up-regulated
Sus_scrofa___OAS2	5.28835	5.95107	50.524	1.66737e-07	0.000160766	3	7	Up-regulated
Sus_scrofa___IFIT2	5.22719	3.23025	49.0852	1.71074e-07	0.000160766	3	7	Up-regulated
Sus_scrofa___SCNN1A	3.0299	1.33884	49.9675	1.78258e-07	0.000161534	3	7	Up-regulated
Sus_scrofa___PIR	2.52414	3.66528	48.5871	2.31956e-07	0.000199547	3	7	Up-regulated
Sus_scrofa___DDHD1	1.4183	6.05643	48.4716	2.35936e-07	0.000199547	3	7	Up-regulated
Sus_scrofa___H1-3	3.8403	2.70512	48.4432	2.49572e-07	0.000204271	3	7	Up-regulated
Sus_scrofa___MOSPD1	1.54014	5.1753	47.4294	2.83985e-07	0.00021835	3	7	Up-regulated
Sus_scrofa___ENSSSCG00000016263	4.66887	1.46259	47.416	3.49618e-07	0.000260908	3	7	Up-regulated
Sus_scrofa___ENO1	1.42786	6.33334	45.1181	4.31704e-07	0.000312961	3	7	Up-regulated
Papio_anubis_HNRNPU	4.71298	0.312406	35.7983	5.22544e-07	0.000361015	3	7	Up-regulated
Sus_scrofa___HLCS	1.37742	5.7832	43.9861	5.33013e-07	0.000361015	3	7	Up-regulated
Sus_scrofa___GHSR	4.68442	1.61606	41.5673	5.43566e-07	0.000361015	3	7	Up-regulated
Sus_scrofa___CNN3	3.50607	0.364045	40.8594	5.5632e-07	0.000361015	3	7	Up-regulated
Sus_scrofa___ENSSSCG00000032436	7.86386	0.639884	51.315	5.73418e-07	0.000361015	3	7	Up-regulated
Sus_scrofa___MLLT11	2.11052	3.70231	43.4546	5.94054e-07	0.000361015	3	7	Up-regulated
Sus_scrofa___CMPK2	6.61562	3.65256	44.8858	5.97589e-07	0.000361015	3	7	Up-regulated
Sus_scrofa___TRIM22	7.46751	-0.675564	62.3547	6.65055e-07	0.000392429	3	7	Up-regulated
Sus_scrofa___TEP1	1.83787	4.38314	42.4283	7.18493e-07	0.000414326	3	7	Up-regulated
Sus_scrofa___GSR	2.49039	5.54951	42.0665	7.68746e-07	0.000430375	3	7	Up-regulated
Sus_scrofa___H2AC6	3.82315	1.98886	40.9246	9.14323e-07	0.000493598	3	7	Up-regulated
Sus_scrofa___MMP25	4.03846	0.440633	37.0773	9.58001e-07	0.000499064	3	7	Up-regulated
Sus_scrofa___TRAF3IP2	1.53941	6.52255	40.901	9.63785e-07	0.000499064	3	7	Up-regulated
Papio_anubis_XRN1	4.34676	0.0112106	34.727	1.0849e-06	0.000550544	3	7	Up-regulated
Sus_scrofa___CDC14A	1.95627	7.21217	39.9344	1.1671e-06	0.000580644	3	7	Up-regulated
Sus_scrofa___MYORG	1.54261	5.91847	39.747	1.21194e-06	0.000591357	3	7	Up-regulated
Sus_scrofa___ENSSSCG00000008898	3.94887	0.114739	36.3838	1.24348e-06	0.000595299	3	7	Up-regulated
Sus_scrofa___DENND5B	1.02957	9.97402	39.3481	1.31267e-06	0.000616784	3	7	Up-regulated
Sus_scrofa___ENSSSCG00000005453	2.64206	2.82603	38.3692	1.60265e-06	0.000725665	3	7	Up-regulated
Sus_scrofa___GM2A	3.01265	2.12892	38.4443	1.64142e-06	0.000725665	3	7	Up-regulated
Sus_scrofa___ENSSSCG00000034610	3.07707	3.12754	38.2581	1.66297e-06	0.000725665	3	7	Up-regulated
Sus_scrofa___PARP14	4.42411	2.32062	34.577	1.6933e-06	0.000725665	3	7	Up-regulated
Sus_scrofa___SRXN1	3.62279	1.77496	37.798	1.72427e-06	0.000725665	3	7	Up-regulated
Papio_anubis_NIPBL	3.82524	1.20934	33.7983	1.74267e-06	0.000725665	3	7	Up-regulated
Sus_scrofa___CCDC180	2.3842	5.45196	37.9039	1.76298e-06	0.000725665	3	7	Up-regulated
Sus_scrofa___ENSSSCG00000017754	3.59679	3.06784	37.8924	1.80179e-06	0.000725665	3	7	Up-regulated
Sus_scrofa___MOB3B	2.34918	4.32419	37.72	1.86626e-06	0.000739884	3	7	Up-regulated
Sus_scrofa___ENSSSCG00000017146	3.31145	6.00142	36.9438	2.15244e-06	0.000840211	3	7	Up-regulated
Sus_scrofa___ISG12(A)	6.17125	5.5562	34.5088	2.43418e-06	0.000935793	3	7	Up-regulated
Sus_scrofa___APOBEC3B	3.05986	2.31262	36.3282	2.50473e-06	0.000948546	3	7	Up-regulated
Sus_scrofa___ENSSSCG00000006777	3.96253	0.622368	31.286	3.25727e-06	0.00121384	3	7	Up-regulated
Sus_scrofa___ENSSSCG00000028691	2.9601	1.76325	34.4653	3.30095e-06	0.00121384	3	7	Up-regulated
Papio_anubis_FOXJ3	3.23524	2.23263	34.3172	3.42512e-06	0.00124151	3	7	Up-regulated
Sus_scrofa___LIN54	1.04112	5.65619	34.3382	3.76023e-06	0.00134378	3	7	Up-regulated
Sus_scrofa___LGALS3BP	4.88016	1.63858	32.2348	3.90347e-06	0.00137559	3	7	Up-regulated
Sus_scrofa___LRP2	2.01763	3.59802	34.0038	4.07185e-06	0.00141528	3	7	Up-regulated
Sus_scrofa___ARMC12	2.30547	2.18774	34.0056	4.15979e-06	0.0014263	3	7	Up-regulated
Sus_scrofa___LAT2	1.74897	2.22049	33.6401	4.3864e-06	0.00148299	3	7	Up-regulated
Sus_scrofa___ABCG2	2.23369	4.41133	33.5889	4.442e-06	0.00148299	3	7	Up-regulated
Sus_scrofa___PSMB8	5.0554	-0.565062	31.3207	4.6449e-06	0.00153058	3	7	Up-regulated
Sus_scrofa___ISG15	5.80594	4.35237	34.429	5.01094e-06	0.00163003	3	7	Up-regulated
Sus_scrofa___DYSF	1.51905	7.92754	32.926	5.14136e-06	0.00165129	3	7	Up-regulated
Sus_scrofa___AKAP7	2.07067	5.94711	32.5999	5.53424e-06	0.00175525	3	7	Up-regulated
Sus_scrofa___GRINA	3.77941	-0.396105	27.4863	6.17409e-06	0.00191043	3	7	Up-regulated
Sus_scrofa___CDIN1	0.955403	7.15392	31.9269	6.44742e-06	0.001961	3	7	Up-regulated
Sus_scrofa___ZDHHC14	3.52123	3.28833	31.9925	6.4921e-06	0.001961	3	7	Up-regulated
Sus_scrofa___MAGI1	1.83813	8.61961	31.8087	6.62415e-06	0.00197735	3	7	Up-regulated
Sus_scrofa___SH3RF2	3.08218	3.98705	31.6452	6.91088e-06	0.00203895	3	7	Up-regulated
Sus_scrofa___OSGIN1	1.74808	4.18521	31.3843	7.32248e-06	0.00213556	3	7	Up-regulated
Sus_scrofa___ASAP1	1.0272	7.56947	31.0082	7.96846e-06	0.00227173	3	7	Up-regulated
Sus_scrofa___C20orf96	2.32925	0.993537	29.9261	8.17684e-06	0.00230523	3	7	Up-regulated
Sus_scrofa___ZBP1	5.34982	-1.06483	32.4155	8.99916e-06	0.0024914	3	7	Up-regulated
Sus_scrofa___ENSSSCG00000014280	1.43056	7.51311	30.4426	9.09451e-06	0.0024914	3	7	Up-regulated
Sus_scrofa___ENSSSCG00000039582	1.5555	4.97266	30.4287	9.13174e-06	0.0024914	3	7	Up-regulated
Sus_scrofa___TRANK1	2.92531	5.05756	30.3833	9.23081e-06	0.00249163	3	7	Up-regulated
Sus_scrofa___ISG20	5.00523	-0.791641	28.3081	1.00664e-05	0.00268857	3	7	Up-regulated
Sus_scrofa___MAP1B	1.60289	6.41489	29.9611	1.01903e-05	0.00269331	3	7	Up-regulated
Sus_scrofa___MTX3	1.52281	3.85478	29.8637	1.04679e-05	0.00273817	3	7	Up-regulated
Sus_scrofa___MOV10	2.82547	3.22528	29.7994	1.06877e-05	0.00275819	3	7	Up-regulated
Sus_scrofa___MTPN	1.56403	6.54427	29.7312	1.07619e-05	0.00275819	3	7	Up-regulated
Sus_scrofa___ENSSSCG00000037142	3.92134	-0.783036	24.1834	1.08795e-05	0.00276046	3	7	Up-regulated
Sus_scrofa___PRXL2A	4.22572	-0.955993	26.2673	1.13425e-05	0.0028215	3	7	Up-regulated
Sus_scrofa___H1-0	2.66142	2.69491	29.1012	1.2829e-05	0.00316028	3	7	Up-regulated
Sus_scrofa___PRKCE	1.05424	9.9085	28.7578	1.35978e-05	0.00328588	3	7	Up-regulated
Papio_anubis_TAOK3	5.00141	-0.715405	33.9913	1.38502e-05	0.0033153	3	7	Up-regulated
Sus_scrofa___FAM171B	2.52803	2.41785	28.6384	1.42906e-05	0.00335735	3	7	Up-regulated
Sus_scrofa___FBN2	3.37744	6.2108	28.4923	1.45081e-05	0.0033772	3	7	Up-regulated
Sus_scrofa___TRIM56	2.85163	1.70628	28.5369	1.47873e-05	0.00341089	3	7	Up-regulated
Sus_scrofa___S100A11	5.15431	-0.110565	24.3336	1.51345e-05	0.00345639	3	7	Up-regulated
Papio_anubis_ATRX	4.51235	-0.947057	27.2073	1.5257e-05	0.00345639	3	7	Up-regulated
Sus_scrofa___UCHL1	6.18933	-1.13835	27.8656	1.62214e-05	0.00362885	3	7	Up-regulated
Sus_scrofa___SCARB2	1.27734	6.03253	28.0157	1.63043e-05	0.00362885	3	7	Up-regulated
Sus_scrofa___UCK2	1.84347	7.18713	27.977	1.64581e-05	0.00363124	3	7	Up-regulated
Sus_scrofa___XPO6	1.06271	6.04088	27.8824	1.68485e-05	0.00367977	3	7	Up-regulated
Sus_scrofa___H3-5	3.04174	6.64241	27.8539	1.69682e-05	0.00367977	3	7	Up-regulated
Sus_scrofa___WTIP	1.46526	4.56424	27.749	1.74284e-05	0.00374755	3	7	Up-regulated
Sus_scrofa___ATF5	2.52408	2.47522	27.6475	1.82363e-05	0.00388831	3	7	Up-regulated
Sus_scrofa___IFIT5	2.75612	3.65972	27.3082	1.95223e-05	0.00412784	3	7	Up-regulated
Sus_scrofa___EZR	1.7931	6.66402	27.2068	1.99272e-05	0.00417863	3	7	Up-regulated
Sus_scrofa___CCDC194	3.37066	-0.175185	24.3331	2.03411e-05	0.00423044	3	7	Up-regulated
Sus_scrofa___ENSSSCG00000016791	3.98738	0.392259	24.5063	2.0567e-05	0.00424265	3	7	Up-regulated
Sus_scrofa___VPS26C	1.08866	5.83412	26.807	2.20338e-05	0.00447251	3	7	Up-regulated
Sus_scrofa___ERAP1	1.74656	3.22752	26.7747	2.22997e-05	0.00449055	3	7	Up-regulated
Sus_scrofa___ABHD4	1.63392	6.16536	26.5817	2.33238e-05	0.00461494	3	7	Up-regulated
Sus_scrofa___ENSSSCG00000014672	3.62781	-0.44848	25.3632	2.34986e-05	0.00461494	3	7	Up-regulated
Sus_scrofa___SLC10A7	1.05953	6.54145	26.5305	2.36272e-05	0.00461494	3	7	Up-regulated
Sus_scrofa___PLSCR1	2.17885	3.83091	26.5428	2.36449e-05	0.00461494	3	7	Up-regulated
Sus_scrofa___DDX60	4.83973	5.47709	26.4468	2.43789e-05	0.00472188	3	7	Up-regulated
Sus_scrofa___PLOD1	1.46692	3.61609	26.3007	2.51399e-05	0.00483239	3	7	Up-regulated
Papio_anubis_ARID1B	4.7192	0.142871	27.6953	2.5741e-05	0.00488541	3	7	Up-regulated
Papio_anubis_MYL2	4.21826	-0.543883	22.0923	2.61086e-05	0.00488541	3	7	Up-regulated
Sus_scrofa___FAM43B	3.09103	-0.198664	22.7269	2.61757e-05	0.00488541	3	7	Up-regulated
Sus_scrofa___DNAJB9	1.72949	3.17644	26.1387	2.62666e-05	0.00488541	3	7	Up-regulated
Papio_anubis_WSB1	5.81325	-0.693511	28.819	2.63785e-05	0.00488541	3	7	Up-regulated
Sus_scrofa___CHMP4B	1.21928	5.97333	26.002	2.70375e-05	0.00493541	3	7	Up-regulated
Sus_scrofa___MEGF9	1.41004	3.6242	25.5515	3.04806e-05	0.00544636	3	7	Up-regulated
Sus_scrofa___ENSSSCG00000007554	1.43604	2.3474	25.3607	3.19189e-05	0.00562416	3	7	Up-regulated
Papio_anubis_HUWE1	3.48409	0.0904701	22.0633	3.25424e-05	0.00569447	3	7	Up-regulated
Sus_scrofa___GCNT4	2.41609	-0.227559	23.6003	3.27789e-05	0.00569657	3	7	Up-regulated
Sus_scrofa___ZNFX1	2.25636	4.83042	25.0722	3.44208e-05	0.00594122	3	7	Up-regulated
Sus_scrofa___IRF7	3.12967	1.09219	23.5867	3.56801e-05	0.00611696	3	7	Up-regulated
Sus_scrofa___SP110	3.52234	2.31846	24.2741	4.1416e-05	0.00700565	3	7	Up-regulated
Sus_scrofa___XKRX	1.94405	2.6068	24.3046	4.2495e-05	0.00710371	3	7	Up-regulated
Sus_scrofa___B2M	2.21605	6.05112	24.2519	4.26977e-05	0.00710371	3	7	Up-regulated
Sus_scrofa___SLC12A6	1.01839	7.08463	24.2393	4.28356e-05	0.00710371	3	7	Up-regulated
Papio_anubis_USP34	6.18729	-0.40652	31.443	4.41406e-05	0.00722567	3	7	Up-regulated
Sus_scrofa___ADAR	1.85038	5.3383	24.0292	4.53158e-05	0.00725293	3	7	Up-regulated
Sus_scrofa___IRF2	1.16093	6.63272	24.0139	4.5491e-05	0.00725293	3	7	Up-regulated
Sus_scrofa___PLEKHA4	2.75798	2.80824	24.0248	4.56008e-05	0.00725293	3	7	Up-regulated
Sus_scrofa___ENSSSCG00000035836	3.19326	0.44675	22.1501	4.56865e-05	0.00725293	3	7	Up-regulated
Sus_scrofa___PARVA	0.997571	7.05165	23.9885	4.5799e-05	0.00725293	3	7	Up-regulated
Sus_scrofa___MAP1A	3.18345	0.52669	22.2069	4.60222e-05	0.00725293	3	7	Up-regulated
Papio_anubis_TUT4	3.8082	0.0568433	21.0149	4.67754e-05	0.00732612	3	7	Up-regulated
Sus_scrofa___SNX21	1.48477	4.15787	23.8937	4.70728e-05	0.00732747	3	7	Up-regulated
Sus_scrofa___ZMAT3	1.92715	3.21377	23.8674	4.75821e-05	0.00734092	3	7	Up-regulated
Sus_scrofa___DYNC1H1	0.974514	5.87871	23.8343	4.77378e-05	0.00734092	3	7	Up-regulated
Sus_scrofa___ENSSSCG00000036669	1.75208	6.64837	23.7099	4.93558e-05	0.00749883	3	7	Up-regulated
Papio_anubis_UBR5	4.785	-0.907973	26.8412	5.08744e-05	0.00768355	3	7	Up-regulated
Papio_anubis_GPATCH8	3.95232	-0.249637	21.4766	5.11847e-05	0.00768467	3	7	Up-regulated
Sus_scrofa___CDC42EP4	3.56727	-0.450756	20.367	5.30663e-05	0.00792031	3	7	Up-regulated
Sus_scrofa___ENSSSCG00000035669	4.1106	0.559462	22.3097	5.69552e-05	0.00840188	3	7	Up-regulated
Sus_scrofa___ACCSL	0.978919	5.83022	22.9855	6.00745e-05	0.00881082	3	7	Up-regulated
Sus_scrofa___LRIG2	0.719432	7.34841	22.9199	6.11537e-05	0.00891317	3	7	Up-regulated
Sus_scrofa___SREBF2	1.38058	5.22644	22.8726	6.19774e-05	0.00891317	3	7	Up-regulated
Sus_scrofa___PROCA1	2.19197	1.99652	22.6584	6.42708e-05	0.00916148	3	7	Up-regulated
Sus_scrofa___ALAD	1.58611	3.7492	22.6959	6.52503e-05	0.00924914	3	7	Up-regulated
Sus_scrofa___NQO1	2.02194	2.09881	22.5223	6.60035e-05	0.00926593	3	7	Up-regulated
Papio_anubis_GOLGA4	3.93375	-0.248252	20.9413	6.60991e-05	0.00926593	3	7	Up-regulated
Sus_scrofa___RNPEP	1.8921	2.18049	22.5603	6.74669e-05	0.0093199	3	7	Up-regulated
Sus_scrofa___NEMP2	1.35643	4.49346	22.5596	6.75861e-05	0.0093199	3	7	Up-regulated
Papio_anubis_PPP4R3B	6.18115	-0.80488	28.5268	6.935e-05	0.00951145	3	7	Up-regulated
Sus_scrofa___H2AC20	3.20207	0.962584	21.8609	7.20388e-05	0.00982711	3	7	Up-regulated
Sus_scrofa___MSMO1	2.20824	2.26248	22.294	7.31977e-05	0.00988805	3	7	Up-regulated
Sus_scrofa___ZC3HAV1	2.98494	4.94328	22.267	7.3265e-05	0.00988805	3	7	Up-regulated
Sus_scrofa___ENSSSCG00000001398	3.46435	-0.097209	21.1032	7.55445e-05	0.0100724	3	7	Up-regulated
Papio_anubis_ENSPANG00000034481	3.9513	-0.405714	19.1157	7.58218e-05	0.0100724	3	7	Up-regulated
Papio_anubis_ARID4B	4.05895	-0.301085	20.0691	7.63153e-05	0.0100851	3	7	Up-regulated
Sus_scrofa___BCAS4	1.41263	2.33456	22.0248	7.88119e-05	0.0101973	3	7	Up-regulated
Papio_anubis_CHD9	3.53023	-0.272939	19.4382	7.88732e-05	0.0101973	3	7	Up-regulated
Sus_scrofa___ENSSSCG00000031163	5.98493	-1.03315	22.9371	7.93329e-05	0.0101973	3	7	Up-regulated
Sus_scrofa___CEP112	1.3514	5.89129	21.9608	7.97504e-05	0.0101973	3	7	Up-regulated
Papio_anubis_ENSPANG00000008041	4.02757	0.313242	18.8621	7.98857e-05	0.0101973	3	7	Up-regulated
Papio_anubis_XPO1	5.23447	-0.525376	25.3579	8.17744e-05	0.0102971	3	7	Up-regulated
Sus_scrofa___TLL2	2.18648	3.49479	21.8619	8.24541e-05	0.0102971	3	7	Up-regulated
Sus_scrofa___PRR16	1.17562	9.53578	21.8238	8.2859e-05	0.0102971	3	7	Up-regulated
Sus_scrofa___NOL3	2.14473	2.5173	21.867	8.31327e-05	0.0102971	3	7	Up-regulated
Sus_scrofa___SERGEF	1.52124	5.14005	21.7801	8.39169e-05	0.010336	3	7	Up-regulated
Sus_scrofa___HPCAL1	1.68626	3.91237	21.6475	8.73416e-05	0.0107059	3	7	Up-regulated
Sus_scrofa___INSIG1	2.56479	1.52554	21.4141	8.84903e-05	0.0107945	3	7	Up-regulated
Sus_scrofa___ABCB6	1.5516	2.73218	21.5565	8.97341e-05	0.0108939	3	7	Up-regulated
Sus_scrofa___TRIM21	2.92102	3.47992	21.464	9.22458e-05	0.0111455	3	7	Up-regulated
Sus_scrofa___CMAS	1.56909	3.64137	21.3917	9.39007e-05	0.0112369	3	7	Up-regulated
Papio_anubis_MATR3	3.49395	-0.575205	20.3346	9.43311e-05	0.0112369	3	7	Up-regulated
Sus_scrofa___PHTF1	1.01487	5.79786	21.3463	9.48249e-05	0.011243	3	7	Up-regulated
Sus_scrofa___EIF2AK3	0.802504	6.47993	21.302	9.60127e-05	0.0112784	3	7	Up-regulated
Sus_scrofa___KCNMA1	1.69567	8.06721	21.2715	9.68443e-05	0.0113106	3	7	Up-regulated
Sus_scrofa___IGF2BP2	1.24862	6.28475	21.2596	9.71784e-05	0.0113106	3	7	Up-regulated
Sus_scrofa___UVRAG	0.910014	8.30802	21.2363	9.78169e-05	0.0113329	3	7	Up-regulated
Sus_scrofa___PARP9	3.5685	3.25426	21.2201	9.9545e-05	0.0114326	3	7	Up-regulated
Sus_scrofa___UBA7	4.94647	-0.958076	21.5105	9.95786e-05	0.0114326	3	7	Up-regulated
Sus_scrofa___HES4	3.75168	-0.954581	19.4085	0.00010099	0.0115424	3	7	Up-regulated
Sus_scrofa___ENSSSCG00000031661	2.85071	3.70248	21.1066	0.000101896	0.0115938	3	7	Up-regulated
Sus_scrofa___EPN3	2.77105	-0.724179	18.1829	0.000104627	0.0117987	3	7	Up-regulated
Sus_scrofa___PSMA6	0.870477	6.05268	20.9214	0.000107026	0.0119629	3	7	Up-regulated
Papio_anubis_UBE3A	2.72904	0.293438	19.511	0.000109368	0.012171	3	7	Up-regulated
Papio_anubis_SPTBN1	2.86033	1.50996	20.4469	0.000111966	0.0122512	3	7	Up-regulated
Sus_scrofa___TSKU	2.68725	-0.911	18.3968	0.000112	0.0122512	3	7	Up-regulated
Sus_scrofa___SH3PXD2A	1.57264	6.47465	20.7623	0.00011202	0.0122512	3	7	Up-regulated
Sus_scrofa___ENSSSCG00000006324	1.70421	2.98941	20.6483	0.000116597	0.0124951	3	7	Up-regulated
Sus_scrofa___CCDC3	2.50966	2.377	20.5712	0.000116712	0.0124951	3	7	Up-regulated
Sus_scrofa___CST3	3.54025	-0.285651	18.3372	0.000118751	0.01266	3	7	Up-regulated
Sus_scrofa___ENSSSCG00000024660	3.46259	1.44716	19.3184	0.000119627	0.0127	3	7	Up-regulated
Sus_scrofa___DTX3L	3.67122	2.63235	20.5566	0.000120524	0.0127419	3	7	Up-regulated
Papio_anubis_EEA1	2.21247	1.21216	19.9141	0.000123146	0.0129651	3	7	Up-regulated
Sus_scrofa___SPSB1	2.29219	3.99201	20.3213	0.000127562	0.0132649	3	7	Up-regulated
Sus_scrofa___C1orf115	2.07469	1.03769	19.2158	0.00012946	0.0133528	3	7	Up-regulated
Sus_scrofa___ENSSSCG00000015027	1.52876	2.51079	20.2695	0.000130497	0.0134052	3	7	Up-regulated
Sus_scrofa___DHDH	1.05596	3.45711	20.2273	0.000131265	0.0134298	3	7	Up-regulated
Sus_scrofa___NCAM1	1.28041	9.66845	19.9173	0.000143166	0.0145302	3	7	Up-regulated
Sus_scrofa___DDC	1.79009	1.03001	19.6504	0.000148257	0.014987	3	7	Up-regulated
Sus_scrofa___HMGA1	2.06677	1.48387	19.7355	0.000151119	0.0152119	3	7	Up-regulated
Sus_scrofa___ENSSSCG00000022322	1.6053	5.59652	19.7192	0.00015178	0.0152119	3	7	Up-regulated
Papio_anubis_RAB2A	3.50902	-0.757626	17.6233	0.000152967	0.0152119	3	7	Up-regulated
Sus_scrofa___SLC25A23	1.4331	3.11366	19.6974	0.00015348	0.0152119	3	7	Up-regulated
Sus_scrofa___C9orf40	1.4913	2.51233	19.633	0.000157329	0.0154725	3	7	Up-regulated
Sus_scrofa___GDAP2	0.920249	5.63034	19.4885	0.000162487	0.0159036	3	7	Up-regulated
Papio_anubis_SUZ12	3.00457	-0.380535	17.6316	0.000164257	0.0159682	3	7	Up-regulated
Sus_scrofa___CLMN	2.66715	2.50718	19.2354	0.000169518	0.0163543	3	7	Up-regulated
Sus_scrofa___SNX24	1.04643	6.87693	19.2983	0.000171909	0.0165221	3	7	Up-regulated
Sus_scrofa___ADCY9	0.986816	6.75652	19.2614	0.000173812	0.016642	3	7	Up-regulated
Sus_scrofa___THNSL2	1.08336	5.16756	19.1928	0.00017745	0.0168631	3	7	Up-regulated
Sus_scrofa___AKR1D1	1.71084	4.37274	19.1666	0.000178944	0.0169416	3	7	Up-regulated
Sus_scrofa___ENSSSCG00000002950	0.814873	6.47988	19.1144	0.000181615	0.0170743	3	7	Up-regulated
Sus_scrofa___ZMYND8	0.72333	7.1622	19.1058	0.000182077	0.0170743	3	7	Up-regulated
Sus_scrofa___TERF2IP	0.973222	4.99331	19.1018	0.000182364	0.0170743	3	7	Up-regulated
Sus_scrofa___SPIDR	2.30662	6.4457	19.0222	0.000186706	0.0173527	3	7	Up-regulated
Sus_scrofa___ENSSSCG00000008767	3.0432	-0.351822	16.841	0.000188056	0.0174144	3	7	Up-regulated
Papio_anubis_RPS12	6.18933	-0.160816	18.926	0.000192396	0.0177515	3	7	Up-regulated
Sus_scrofa___DNASE1L1	1.67576	2.27203	18.898	0.000194635	0.017893	3	7	Up-regulated
Sus_scrofa___NFKB1	0.66971	7.23221	18.8695	0.000195447	0.0178944	3	7	Up-regulated
Papio_anubis_TTC3	3.93302	-0.95031	17.9043	0.000202497	0.0182846	3	7	Up-regulated
Sus_scrofa___STOX2	2.70433	1.38219	18.3296	0.000205556	0.0184296	3	7	Up-regulated
Sus_scrofa___ENSSSCG00000013889	3.652	2.87374	18.7187	0.000207425	0.0185317	3	7	Up-regulated
Sus_scrofa___TLR3	2.72213	0.157161	17.1249	0.00020885	0.0185935	3	7	Up-regulated
Sus_scrofa___PSMF1	0.95901	7.0072	18.6008	0.000211963	0.0187392	3	7	Up-regulated
Sus_scrofa___ENSSSCG00000033720	2.76418	1.04193	18.1206	0.00021411	0.0188632	3	7	Up-regulated
Sus_scrofa___ARL8A	1.35846	3.45209	18.4479	0.000222819	0.0192785	3	7	Up-regulated
Sus_scrofa___TTC39C	2.11241	0.442634	17.1877	0.000223661	0.0192785	3	7	Up-regulated
Sus_scrofa___TFG	0.895341	5.48896	18.4134	0.000224417	0.0192785	3	7	Up-regulated
Sus_scrofa___KCNJ2	1.18886	5.82368	18.3072	0.000231786	0.0195692	3	7	Up-regulated
Papio_anubis_SMG1	3.40799	-0.377099	17.3876	0.000232389	0.0195692	3	7	Up-regulated
Sus_scrofa___RAB36	2.50091	-0.92056	15.8088	0.000243765	0.0202789	3	7	Up-regulated
Sus_scrofa___RESF1	1.30137	5.4951	18.0885	0.000247832	0.0205498	3	7	Up-regulated
Papio_anubis_CUL3	4.18889	-0.616126	17.7491	0.000257897	0.0211767	3	7	Up-regulated
Sus_scrofa___CCDC167	1.4448	2.20747	17.8499	0.000267099	0.0217913	3	7	Up-regulated
Sus_scrofa___ENSSSCG00000003621	1.15134	2.86807	17.835	0.000269459	0.0218806	3	7	Up-regulated
Sus_scrofa___LRP3	2.12152	1.16109	17.741	0.000269918	0.0218806	3	7	Up-regulated
Sus_scrofa___PML	2.61111	5.22571	17.7635	0.000273973	0.022133	3	7	Up-regulated
Sus_scrofa___SUSD6	1.18211	5.3931	17.7535	0.000274777	0.022133	3	7	Up-regulated
Sus_scrofa___ENSSSCG00000016969	2.02314	2.12518	17.7576	0.00027671	0.022175	3	7	Up-regulated
Sus_scrofa___RIN3	1.70048	5.47373	17.7275	0.000277046	0.022175	3	7	Up-regulated
Sus_scrofa___ENSSSCG00000002935	0.929455	4.36521	17.6994	0.000279666	0.0222444	3	7	Up-regulated
Papio_anubis_PPIG	4.95355	-1.34162	19.1498	0.000285528	0.022618	3	7	Up-regulated
Sus_scrofa___SLCO3A1	0.990535	9.57196	17.5782	0.000290074	0.022618	3	7	Up-regulated
Sus_scrofa___DDX11	1.32496	3.30694	17.5561	0.000292983	0.022618	3	7	Up-regulated
Sus_scrofa___INHBA	2.88451	1.77867	16.6225	0.000293278	0.022618	3	7	Up-regulated
Sus_scrofa___ENSSSCG00000042730	2.87709	-0.783621	15.6782	0.000293718	0.022618	3	7	Up-regulated
Sus_scrofa___PSMD3	0.973042	4.84462	17.5375	0.000293905	0.022618	3	7	Up-regulated
Sus_scrofa___ENSSSCG00000012427	2.77238	2.36675	17.1237	0.00030232	0.0231047	3	7	Up-regulated
Sus_scrofa___KHNYN	1.55806	2.22523	17.4529	0.000303375	0.0231157	3	7	Up-regulated
Sus_scrofa___FKBP5	1.56872	8.61188	17.4149	0.000305209	0.0231669	3	7	Up-regulated
Sus_scrofa___SLC37A1	1.22731	3.2722	17.407	0.000307091	0.0231669	3	7	Up-regulated
Sus_scrofa___ADGRB1	1.67117	3.26316	17.3815	0.000309661	0.0232456	3	7	Up-regulated
Sus_scrofa___MAPRE3	1.08831	5.41907	17.3103	0.000315409	0.0236073	3	7	Up-regulated
Sus_scrofa___PGAM2	2.06709	3.20573	17.2988	0.000317829	0.0237133	3	7	Up-regulated
Sus_scrofa___PLAAT3	1.21466	5.12467	17.2777	0.000318694	0.0237133	3	7	Up-regulated
Sus_scrofa___FAM155B	2.74476	0.389048	16.4856	0.000326173	0.0240988	3	7	Up-regulated
Sus_scrofa___STAC2	3.09105	6.01904	17.2166	0.000326725	0.0240988	3	7	Up-regulated
Sus_scrofa___CAMTA1	0.72308	7.61197	17.0825	0.00033873	0.0247683	3	7	Up-regulated
Sus_scrofa___LDLR	3.05682	-0.282134	16.2716	0.000341695	0.0249092	3	7	Up-regulated
Sus_scrofa___RAB18	0.655675	6.74468	17.0223	0.000345228	0.0249092	3	7	Up-regulated
Sus_scrofa___RAB11FIP5	1.55798	2.81308	17.0119	0.00034831	0.0249092	3	7	Up-regulated
Sus_scrofa___SLC25A13	0.769466	7.95039	16.9903	0.000348721	0.0249092	3	7	Up-regulated
Papio_anubis_WASHC4	2.62393	-0.346182	15.762	0.000349237	0.0249092	3	7	Up-regulated
Papio_anubis_PSME4	5.44641	-0.888928	20.2019	0.000349492	0.0249092	3	7	Up-regulated
Sus_scrofa___S100Z	5.45123	-1.40587	19.0261	0.000363753	0.0256225	3	7	Up-regulated
Sus_scrofa___SLC37A2	1.95657	1.42234	16.8203	0.000365475	0.0256225	3	7	Up-regulated
Papio_anubis_SETD2	5.44641	-1.00829	19.4973	0.000375405	0.026025	3	7	Up-regulated
Sus_scrofa___JCHAIN	1.01203	4.86255	16.7172	0.00038037	0.0262974	3	7	Up-regulated
Sus_scrofa___SHISA5	2.36872	1.79597	16.6825	0.000382306	0.0263594	3	7	Up-regulated
Papio_anubis_KMT2A	3.29337	-0.156191	14.9634	0.000386344	0.0265656	3	7	Up-regulated
Sus_scrofa___LIPA	1.67739	5.7079	16.6488	0.000388628	0.0265786	3	7	Up-regulated
Sus_scrofa___TMEM140	2.05583	2.91057	16.5655	0.000401332	0.0273736	3	7	Up-regulated
Sus_scrofa___STAT1	2.61245	7.1606	16.4993	0.000407577	0.027725	3	7	Up-regulated
Sus_scrofa___ENSSSCG00000004578	2.19686	3.40247	16.5002	0.00040886	0.027738	3	7	Up-regulated
Papio_anubis_PHTF2	4.98828	-1.13692	19.0122	0.000418079	0.0282878	3	7	Up-regulated
Sus_scrofa___ENSSSCG00000035738	3.56922	1.18459	15.1854	0.000425962	0.0287084	3	7	Up-regulated
Sus_scrofa___MAMLD1	1.53515	4.62448	16.359	0.000426558	0.0287084	3	7	Up-regulated
Sus_scrofa___TFAP4	2.107	0.679559	15.7022	0.000433682	0.0291062	3	7	Up-regulated
Sus_scrofa___NCK2	0.848817	5.4734	16.2922	0.00043561	0.0291062	3	7	Up-regulated
Sus_scrofa___VPS53	0.679876	6.60951	16.2604	0.00044003	0.0291062	3	7	Up-regulated
Sus_scrofa___EIF4EBP1	1.48003	3.14751	16.2715	0.000440338	0.0291062	3	7	Up-regulated
Sus_scrofa___BACE2	1.12114	6.7681	16.23	0.000444353	0.0292846	3	7	Up-regulated
Papio_anubis_PICALM	4.3194	-1.17231	16.942	0.000462528	0.0299568	3	7	Up-regulated
Papio_anubis_BIRC6	4.56294	-0.680775	17.7286	0.000471455	0.0300357	3	7	Up-regulated
Papio_anubis_PIAS1	3.63989	0.371218	15.116	0.00047194	0.0300357	3	7	Up-regulated
Sus_scrofa___GK5	1.53278	3.83054	16.0467	0.000472297	0.0300357	3	7	Up-regulated
Sus_scrofa___CALR3	1.48759	2.40016	16.0671	0.000472544	0.0300357	3	7	Up-regulated
Sus_scrofa___HSPBAP1	0.963992	4.61058	16.0347	0.000473506	0.0300357	3	7	Up-regulated
Papio_anubis_HNRNPD	4.01048	-0.98636	16.6791	0.000477295	0.0301102	3	7	Up-regulated
Sus_scrofa___UTRN	0.906253	8.92556	16.008	0.000477376	0.0301102	3	7	Up-regulated
Papio_anubis_ERBIN	5.45243	-1.08581	18.1239	0.000492329	0.0309087	3	7	Up-regulated
Sus_scrofa___RBM25	0.732907	7.57009	15.9064	0.00049336	0.0309087	3	7	Up-regulated
Sus_scrofa___ENSSSCG00000015823	1.77002	0.991387	15.8225	0.000496168	0.0310081	3	7	Up-regulated
Sus_scrofa___UBE2Z	0.972059	4.94556	15.8297	0.000506017	0.0315459	3	7	Up-regulated
Sus_scrofa___EIF4E3	0.848217	5.84014	15.8017	0.000510501	0.0317474	3	7	Up-regulated
Sus_scrofa___MTHFD2L	0.663641	7.18624	15.7603	0.000517384	0.0320603	3	7	Up-regulated
Papio_anubis_MED13	3.37813	-0.141044	14.5096	0.00052209	0.0321529	3	7	Up-regulated
Sus_scrofa___RHBDD1	0.979	4.79874	15.6342	0.000539325	0.0326523	3	7	Up-regulated
Papio_anubis_ELF2	5.14116	-1.18747	17.6202	0.000540258	0.0326523	3	7	Up-regulated
Papio_anubis_CHCHD10	5.69706	-1.32267	17.945	0.000551409	0.0330435	3	7	Up-regulated
Sus_scrofa___TUFT1	1.4513	0.889675	15.4062	0.000555834	0.033106	3	7	Up-regulated
Sus_scrofa___AHR	1.19031	5.13565	15.5049	0.000562633	0.0333701	3	7	Up-regulated
Sus_scrofa___UBB	2.41255	3.12282	15.4865	0.000569432	0.0335225	3	7	Up-regulated
Sus_scrofa___IGF2BP3	0.900427	6.48764	15.459	0.000571057	0.0335372	3	7	Up-regulated
Sus_scrofa___NLRC5	2.67452	6.07336	15.4558	0.000572325	0.0335372	3	7	Up-regulated
Papio_anubis_HECTD1	5.44881	-0.657356	16.3064	0.000576672	0.033714	3	7	Up-regulated
Sus_scrofa___ENSSSCG00000033010	1.96857	3.71387	15.3429	0.000595203	0.0346378	3	7	Up-regulated
Sus_scrofa___TTC39A	2.31042	3.46227	15.334	0.000597084	0.0346678	3	7	Up-regulated
Sus_scrofa___H2AW	4.32836	-1.38691	16.1417	0.00060732	0.0348778	3	7	Up-regulated
Sus_scrofa___BLVRB	1.37248	2.67907	15.2764	0.000608322	0.0348778	3	7	Up-regulated
Sus_scrofa___HMOX2	1.04697	7.08868	15.2594	0.000609864	0.0348778	3	7	Up-regulated
Papio_anubis_HERC1	3.51863	-0.168711	14.0154	0.000609872	0.0348778	3	7	Up-regulated
Sus_scrofa___WDFY3	0.649918	8.02934	15.2543	0.000610897	0.0348778	3	7	Up-regulated
Sus_scrofa___MSN	1.8647	3.63975	15.2451	0.000614295	0.0349473	3	7	Up-regulated
Sus_scrofa___SLC33A1	0.818686	5.77896	15.1955	0.00062295	0.0351385	3	7	Up-regulated
Sus_scrofa___PSMA5	0.934739	4.11629	15.1965	0.00062339	0.0351385	3	7	Up-regulated
Sus_scrofa___TMEM238	4.31589	-1.12057	14.1777	0.000625872	0.0351385	3	7	Up-regulated
Sus_scrofa___HIF3A	1.17957	6.5883	15.1808	0.000625964	0.0351385	3	7	Up-regulated
Sus_scrofa___TRAF3	1.27831	4.02172	15.1106	0.000641582	0.0359357	3	7	Up-regulated
Papio_anubis_ENSPANG00000000627	4.74463	-1.31933	15.4727	0.000652094	0.0364243	3	7	Up-regulated
Sus_scrofa___WDR54	3.06083	-0.961158	13.45	0.000653178	0.0364243	3	7	Up-regulated
Sus_scrofa___DENND3	1.93354	2.71224	15.0566	0.000655878	0.0364947	3	7	Up-regulated
Sus_scrofa___MGMT	1.35027	6.83151	15.0164	0.000661065	0.0365934	3	7	Up-regulated
Sus_scrofa___PARP12	3.46869	5.48223	15.0237	0.000661947	0.0365934	3	7	Up-regulated
Sus_scrofa___CCDC15	0.907479	5.08559	15.0129	0.000661978	0.0365934	3	7	Up-regulated
Sus_scrofa___ENSSSCG00000025631	1.27612	2.92671	14.9961	0.000668378	0.0368431	3	7	Up-regulated
Papio_anubis_ARHGEF12	5.33387	-1.00732	15.5868	0.000669399	0.0368431	3	7	Up-regulated
Sus_scrofa___CYP2E1	1.02046	3.1363	14.9413	0.00068017	0.0373549	3	7	Up-regulated
Sus_scrofa___APLP2	0.674043	6.33274	14.8806	0.000691699	0.0378651	3	7	Up-regulated
Sus_scrofa___HECTD4	0.877009	8.92241	14.8773	0.000692445	0.0378651	3	7	Up-regulated
Sus_scrofa___RNF19B	1.33284	4.03255	14.8602	0.000697993	0.0379737	3	7	Up-regulated
Sus_scrofa___KSR1	1.03553	6.35291	14.8371	0.000701842	0.0379737	3	7	Up-regulated
Papio_anubis_NSD1	5.44761	-1.09646	16.945	0.000702857	0.0379737	3	7	Up-regulated
Sus_scrofa___ENSSSCG00000039365	5.14116	-1.21716	14.105	0.000703411	0.0379737	3	7	Up-regulated
Papio_anubis_HSPA4	3.40387	-1.16832	13.561	0.000709386	0.038215	3	7	Up-regulated
Sus_scrofa___RUNDC3B	0.994094	5.20177	14.7478	0.000723272	0.0386745	3	7	Up-regulated
Papio_anubis_UBE2W	4.32312	-0.881207	16.0836	0.000727166	0.0387613	3	7	Up-regulated
Papio_anubis_ENSPANG00000017841	4.32928	-0.429191	14.645	0.000734116	0.0390497	3	7	Up-regulated
Sus_scrofa___PSMD14	0.914187	6.54865	14.687	0.000738037	0.0391762	3	7	Up-regulated
Sus_scrofa___COL16A1	2.25519	1.2165	14.5474	0.000742112	0.0393103	3	7	Up-regulated
Sus_scrofa___EEA1	0.740628	7.25376	14.6487	0.000747589	0.039394	3	7	Up-regulated
Sus_scrofa___PEX7	0.73594	5.56768	14.6485	0.000747716	0.039394	3	7	Up-regulated
Papio_anubis_DMXL1	4.74329	-1.2111	15.3948	0.000756146	0.0395669	3	7	Up-regulated
Sus_scrofa___YBX3	1.19188	8.1304	14.6113	0.000757046	0.0395669	3	7	Up-regulated
Sus_scrofa___PFKP	1.36525	3.65869	14.5287	0.000779697	0.0404087	3	7	Up-regulated
Papio_anubis_PTP4A2	3.69196	-1.23618	14.0334	0.000783552	0.0404087	3	7	Up-regulated
Sus_scrofa___SPHK1	2.59557	-0.265878	13.4737	0.000788332	0.0405727	3	7	Up-regulated
Sus_scrofa___PPP2R2C	1.69866	0.808309	14.2935	0.000794419	0.0407799	3	7	Up-regulated
Sus_scrofa___S100A6	3.82568	-1.11993	15.4562	0.000795573	0.0407799	3	7	Up-regulated
Sus_scrofa___KIAA1614	0.960485	4.21919	14.4571	0.000798594	0.0408523	3	7	Up-regulated
Sus_scrofa___SUSD1	1.18604	4.17141	14.4205	0.000807961	0.041071	3	7	Up-regulated
Sus_scrofa___NDUFB7	2.38282	2.31988	14.4494	0.000808555	0.041071	3	7	Up-regulated
Sus_scrofa___EIF4EBP2	1.21782	5.7018	14.4164	0.00080862	0.041071	3	7	Up-regulated
Sus_scrofa___MFSD5	2.36687	-0.544998	13.3016	0.000815937	0.0413229	3	7	Up-regulated
Papio_anubis_PHF14	5.80654	-1.10782	15.4385	0.000827576	0.0417457	3	7	Up-regulated
Papio_anubis_PPP1R12A	2.05235	0.765044	13.8471	0.000831373	0.0417828	3	7	Up-regulated
Sus_scrofa___ENSSSCG00000015645	1.14327	5.79651	14.3243	0.000834256	0.0417828	3	7	Up-regulated
Sus_scrofa___STN1	0.951997	4.80092	14.299	0.000841627	0.0417828	3	7	Up-regulated
Sus_scrofa___SLIT2	2.96361	4.95101	14.2934	0.000843717	0.0417828	3	7	Up-regulated
Sus_scrofa___DLG5	1.51035	6.8465	14.285	0.000845386	0.0417828	3	7	Up-regulated
Sus_scrofa___NANS	0.808714	5.55071	14.2636	0.000851658	0.0417828	3	7	Up-regulated
Sus_scrofa___AIF1L	2.15064	2.52541	14.2846	0.000852039	0.0417828	3	7	Up-regulated
Papio_anubis_CSNK1A1	5.13862	-0.76002	16.5508	0.000868138	0.0422335	3	7	Up-regulated
Papio_anubis_U5-10	2.82699	-0.629595	12.8349	0.000869866	0.0422335	3	7	Up-regulated
Sus_scrofa___HEBP1	1.90324	1.86876	14.2337	0.000871267	0.0422335	3	7	Up-regulated
Sus_scrofa___MRPS9	0.609491	6.01912	14.1546	0.000883806	0.0424704	3	7	Up-regulated
Sus_scrofa___SERP2	1.19172	3.55013	14.1595	0.000883854	0.0424704	3	7	Up-regulated
Sus_scrofa___SQLE	1.76754	4.46883	14.1352	0.000890006	0.0424704	3	7	Up-regulated
Papio_anubis_MAP4K5	4.777	-1.04126	16.3206	0.00089054	0.0424704	3	7	Up-regulated
Papio_anubis_PSMC3	5.69821	-1.35794	17.2102	0.00089225	0.0424704	3	7	Up-regulated
Sus_scrofa___ENSSSCG00000022794	2.06157	0.686546	13.8562	0.00089537	0.0424704	3	7	Up-regulated
Sus_scrofa___TXNIP	1.85649	8.2021	14.1145	0.000895912	0.0424704	3	7	Up-regulated
Sus_scrofa___ME1	1.32301	5.22308	14.1121	0.000896857	0.0424704	3	7	Up-regulated
Sus_scrofa___ENSSSCG00000043778	1.06607	5.01402	14.1028	0.000899716	0.0424704	3	7	Up-regulated
Sus_scrofa___TM2D3	0.861825	5.2866	14.0974	0.000901311	0.0424704	3	7	Up-regulated
Sus_scrofa___FAM151B	1.00638	3.31542	14.1035	0.000901865	0.0424704	3	7	Up-regulated
Sus_scrofa___IDI1	1.79895	1.39613	13.8625	0.00091129	0.0427397	3	7	Up-regulated
Sus_scrofa___VPS37C	0.892992	3.87617	14.0058	0.000931139	0.0433501	3	7	Up-regulated
Papio_anubis_ENSPANG00000018446	3.39717	-0.983674	12.6343	0.000936758	0.0434956	3	7	Up-regulated
Papio_anubis_CERT1	5.14243	-1.31975	15.1479	0.00095026	0.0439981	3	7	Up-regulated
Papio_anubis_CDC14A	3.92123	-0.587119	12.7768	0.000966737	0.0444366	3	7	Up-regulated
Papio_anubis_LUC7L3	2.41516	0.0202499	13.1734	0.000970855	0.0444642	3	7	Up-regulated
Papio_anubis_UBE2D2	5.58155	-0.79933	13.7169	0.00097428	0.0444642	3	7	Up-regulated
Papio_anubis_AKAP9	2.65069	0.0465312	12.8425	0.000989565	0.0445835	3	7	Up-regulated
Sus_scrofa___SOGA1	1.15313	3.93545	13.8252	0.0009904	0.0445835	3	7	Up-regulated
Papio_anubis_OSBPL9	5.4452	-1.0287	15.7382	0.00100598	0.0450173	3	7	Up-regulated
Papio_anubis_YWHAE	3.68487	-0.654244	13.6142	0.00101957	0.045385	3	7	Up-regulated
Papio_anubis_U4-51	3.93984	-0.995542	12.9677	0.00102248	0.0454349	3	7	Up-regulated
Sus_scrofa___LSM11	1.3864	1.73552	13.6482	0.00106009	0.0465643	3	7	Up-regulated
Sus_scrofa___COPZ2	1.44851	2.41257	13.6303	0.00106217	0.0465643	3	7	Up-regulated
Sus_scrofa___RAB11FIP2	0.963292	5.097	13.6175	0.00106313	0.0465643	3	7	Up-regulated
Sus_scrofa___VCP	0.769552	7.07624	13.6135	0.00106441	0.0465643	3	7	Up-regulated
Sus_scrofa___TARM1	2.41202	-0.470165	12.579	0.00107003	0.0467297	3	7	Up-regulated
Sus_scrofa___LEPROT	1.41783	2.77152	13.6058	0.00107219	0.0467346	3	7	Up-regulated
Sus_scrofa___ENSSSCG00000031922	3.71934	-0.162456	12.6608	0.00107383	0.0467346	3	7	Up-regulated
Sus_scrofa___ANKRD2	2.84206	2.80953	13.5843	0.00108538	0.04714	3	7	Up-regulated
Sus_scrofa___SND1	0.954168	6.50223	13.5534	0.00108686	0.04714	3	7	Up-regulated
Sus_scrofa___ENSSSCG00000002953	2.46839	0.307215	13.0654	0.00108984	0.0471884	3	7	Up-regulated
Papio_anubis_ATP5MC1	3.91031	-0.581468	12.6839	0.00111002	0.047899	3	7	Up-regulated
Sus_scrofa___C16orf72	0.63013	6.14928	13.4718	0.00111813	0.048167	3	7	Up-regulated
Sus_scrofa___BAMBI	2.68338	-0.619805	12.1387	0.00113084	0.0484674	3	7	Up-regulated
Sus_scrofa___IFI35	2.63897	-0.893365	12.6591	0.0011397	0.0487279	3	7	Up-regulated
Papio_anubis_UBR3	2.99386	-0.1193	12.9426	0.00114076	0.0487279	3	7	Up-regulated
Sus_scrofa___GAN	1.15824	6.01263	13.3885	0.00115107	0.0490034	3	7	Up-regulated
Papio_anubis_SAMD4A	4.49275	-1.29211	14.8864	0.00115407	0.0490489	3	7	Up-regulated
Sus_scrofa___CHCHD5	1.8905	1.03034	13.3045	0.00116181	0.0492188	3	7	Up-regulated
Sus_scrofa___TSPAN2	1.69105	3.47727	13.3605	0.0011652	0.0492188	3	7	Up-regulated
Sus_scrofa___HSD11B1L	3.1334	3.47565	13.3414	0.00117475	0.0493186	3	7	Up-regulated
Sus_scrofa___SPRYD3	1.32217	2.49229	13.341	0.00117596	0.0493186	3	7	Up-regulated
Sus_scrofa___NFATC2	1.38961	3.80787	13.3141	0.00118332	0.0494067	3	7	Up-regulated
Papio_anubis_NF1	3.93756	-0.900221	13.5599	0.00118585	0.0494067	3	7	Up-regulated
Sus_scrofa___RSRC1	0.751976	6.72705	13.2959	0.00118884	0.0494498	3	7	Up-regulated
Sus_scrofa___CRACD	1.36569	6.21457	13.2688	0.00120021	0.0496784	3	7	Up-regulated
Sus_scrofa___ABHD17C	1.15012	5.0445	13.2562	0.00120595	0.0497539	3	7	Up-regulated
Papio_anubis_ENSPANG00000017987	5.13608	-1.31861	14.1157	0.00121541	0.049826	3	7	Up-regulated
Sus_scrofa___ENSSSCG00000033786	1.11038	6.51081	13.2149	0.00122303	0.0499022	3	7	Up-regulated
Sus_scrofa___ENSSSCG00000036052	-1.75679	9.40151	47.6647	2.72085e-07	0.000215738	3	7	Down-regulated
Sus_scrofa___ADAMTSL1	-2.51413	7.94265	41.9851	7.80249e-07	0.000430375	3	7	Down-regulated
Sus_scrofa___ACTC1	-4.67336	7.95784	37.8651	1.77889e-06	0.000725665	3	7	Down-regulated
Sus_scrofa___MYBPC3	-1.46599	10.8372	32.2272	6.02073e-06	0.00188597	3	7	Down-regulated
Sus_scrofa___PDLIM7	-1.56116	6.98302	31.2423	7.54805e-06	0.00217632	3	7	Down-regulated
Sus_scrofa___DAPL1	-2.65022	4.86158	29.6386	1.10043e-05	0.00276448	3	7	Down-regulated
Sus_scrofa___PLXNC1	-1.9266	3.83705	28.9552	1.30119e-05	0.00317452	3	7	Down-regulated
Sus_scrofa___MYLIP	-2.28324	4.83554	28.6466	1.40235e-05	0.00332541	3	7	Down-regulated
Sus_scrofa___ENSSSCG00000038605	-3.55489	3.6051	26.3719	2.18861e-05	0.00447251	3	7	Down-regulated
Sus_scrofa___ADRA1A	-3.56126	6.84624	26.0413	2.684e-05	0.00493486	3	7	Down-regulated
Sus_scrofa___RNF207	-1.65162	6.79311	25.7612	2.87663e-05	0.00521348	3	7	Down-regulated
Sus_scrofa___ASB14	-2.80624	3.9844	25.4559	3.03822e-05	0.00544636	3	7	Down-regulated
Sus_scrofa___CCDC141	-1.22029	10.3146	25.435	3.12894e-05	0.00555179	3	7	Down-regulated
Sus_scrofa___AASS	-2.76227	5.34128	24.8024	3.70163e-05	0.00630345	3	7	Down-regulated
Papio_anubis_TPM2	-2.73422	3.68567	24.0023	4.38726e-05	0.00722567	3	7	Down-regulated
Sus_scrofa___ZBTB7C	-3.04186	5.37876	23.8198	4.80807e-05	0.00734911	3	7	Down-regulated
Sus_scrofa___CRYBG3	-1.8368	10.4765	23.3646	5.41764e-05	0.0080387	3	7	Down-regulated
Sus_scrofa___ENSSSCG00000043840	-6.21241	0.444947	23.0228	6.17795e-05	0.00891317	3	7	Down-regulated
Sus_scrofa___ENSSSCG00000039552	-3.46077	4.33407	22.7561	6.21776e-05	0.00891317	3	7	Down-regulated
Sus_scrofa___CACNA1D	-1.28395	5.09136	22.6056	6.67554e-05	0.0093065	3	7	Down-regulated
Sus_scrofa___ENSSSCG00000037140	-2.21322	5.15331	22.1929	7.49484e-05	0.0100617	3	7	Down-regulated
Sus_scrofa___SRSF1	-0.922081	5.90663	21.9981	7.8934e-05	0.0101973	3	7	Down-regulated
Sus_scrofa___CYP2C42	-1.8194	4.16286	21.9632	7.99776e-05	0.0101973	3	7	Down-regulated
Sus_scrofa___ACOT11	-2.23013	8.36109	21.9052	8.09926e-05	0.0102751	3	7	Down-regulated
Sus_scrofa___MMP11	-2.91594	6.7532	21.8124	8.31947e-05	0.0102971	3	7	Down-regulated
Sus_scrofa___ZDHHC8	-2.15583	3.25712	21.2459	9.37862e-05	0.0112369	3	7	Down-regulated
Sus_scrofa___WNK3	-2.57399	3.38685	21.1655	9.56413e-05	0.0112784	3	7	Down-regulated
Sus_scrofa___JADE1	-1.64561	8.48694	21.0321	0.00010368	0.0117441	3	7	Down-regulated
Sus_scrofa___GBA2	-1.04593	5.74537	20.9763	0.000105385	0.0118315	3	7	Down-regulated
Sus_scrofa___SRSF5	-1.26727	7.43093	20.7799	0.000111452	0.0122512	3	7	Down-regulated
Sus_scrofa___SLC2A4	-1.67161	6.16096	20.6993	0.000114099	0.0124066	3	7	Down-regulated
Sus_scrofa___ADAM9	-1.23763	5.50838	20.6756	0.000114898	0.0124066	3	7	Down-regulated
Sus_scrofa___RPL22	-1.54546	6.75383	20.6743	0.000114908	0.0124066	3	7	Down-regulated
Sus_scrofa___FCGR1A	-2.8486	3.08386	20.1081	0.000125604	0.0131692	3	7	Down-regulated
Sus_scrofa___GRM5	-3.31908	6.15002	20.355	0.000126186	0.0131758	3	7	Down-regulated
Sus_scrofa___NAALADL2	-1.38136	7.48505	20.2877	0.000128491	0.013307	3	7	Down-regulated
Sus_scrofa___ENSSSCG00000041764	-0.927603	8.20082	19.9435	0.000142076	0.0144774	3	7	Down-regulated
Sus_scrofa___NAV2	-1.41834	9.83699	19.6983	0.000152693	0.0152119	3	7	Down-regulated
Sus_scrofa___ENSSSCG00000048278	-2.14043	3.29385	19.553	0.000157187	0.0154725	3	7	Down-regulated
Sus_scrofa___LRRN3	-2.82388	3.58672	19.3783	0.000162966	0.0159036	3	7	Down-regulated
Sus_scrofa___NASP	-1.10503	5.20683	19.4407	0.000164911	0.0159705	3	7	Down-regulated
Sus_scrofa___LDHD	-2.57997	2.1568	18.8521	0.000175129	0.0167051	3	7	Down-regulated
Sus_scrofa___ENSSSCG00000045296	-2.79736	3.30388	18.9299	0.000183826	0.0171478	3	7	Down-regulated
Sus_scrofa___ENSSSCG00000043628	-2.46396	3.93125	18.8494	0.00019606	0.0178944	3	7	Down-regulated
Sus_scrofa___NDUFB3	-1.00872	6.05544	18.7671	0.000201605	0.0182846	3	7	Down-regulated
Sus_scrofa___HNRNPH1	-0.773102	7.31991	18.7628	0.000201838	0.0182846	3	7	Down-regulated
Sus_scrofa___ENOX1	-1.94404	9.6451	18.7388	0.000203302	0.0182922	3	7	Down-regulated
Sus_scrofa___PTN	-3.64818	2.47775	18.2714	0.000210875	0.0187081	3	7	Down-regulated
Sus_scrofa___SLC24A4	-1.23513	4.5345	18.548	0.000215887	0.018954	3	7	Down-regulated
Sus_scrofa___ATP10D	-1.89769	5.7165	18.49	0.000219422	0.0191979	3	7	Down-regulated
Sus_scrofa___ENSSSCG00000049978	-3.28354	1.9584	18.0095	0.000221254	0.0192785	3	7	Down-regulated
Sus_scrofa___SMPD4	-0.881544	4.76821	18.4427	0.000222638	0.0192785	3	7	Down-regulated
Sus_scrofa___CLRN1	-4.49115	1.05134	17.8314	0.000224902	0.0192785	3	7	Down-regulated
Sus_scrofa___ENSSSCG00000041499	-3.54647	4.82299	18.2903	0.000228685	0.0195368	3	7	Down-regulated
Sus_scrofa___ITGAM	-2.2644	3.18335	18.2428	0.000231914	0.0195692	3	7	Down-regulated
Sus_scrofa___SLC51A	-3.12964	1.38888	18.0123	0.000232524	0.0195692	3	7	Down-regulated
Sus_scrofa___FER1L6	-1.94535	5.32734	18.2947	0.000232921	0.0195692	3	7	Down-regulated
Sus_scrofa___MAML3	-1.50127	7.62197	18.2399	0.000236567	0.0198099	3	7	Down-regulated
Sus_scrofa___ENSSSCG00000045412	-3.16842	4.42011	18.2098	0.000237386	0.0198131	3	7	Down-regulated
Sus_scrofa___FAM160A2	-1.48886	3.89242	18.0698	0.00025014	0.0206736	3	7	Down-regulated
Sus_scrofa___MYLK3	-1.1433	8.91384	17.9935	0.000255125	0.0210171	3	7	Down-regulated
Sus_scrofa___ENSSSCG00000047860	-1.5241	4.70958	17.8904	0.00026385	0.0215957	3	7	Down-regulated
Sus_scrofa___ISM1	-3.45736	5.02687	17.717	0.000278362	0.0222103	3	7	Down-regulated
Sus_scrofa___ENSSSCG00000013530	-1.84374	3.80846	17.5932	0.000288794	0.022618	3	7	Down-regulated
Sus_scrofa___ENSSSCG00000043872	-2.54422	4.39446	17.541	0.000292634	0.022618	3	7	Down-regulated
Sus_scrofa___CHCHD3	-3.41886	2.24468	17.2057	0.000292864	0.022618	3	7	Down-regulated
Sus_scrofa___ENSSSCG00000043698	-3.69061	0.0448954	16.8075	0.000293261	0.022618	3	7	Down-regulated
Sus_scrofa___RPS6KB2	-1.12304	4.62255	17.5379	0.000294168	0.022618	3	7	Down-regulated
Sus_scrofa___ENSSSCG00000049101	-2.69409	2.53414	17.2817	0.000295674	0.0226651	3	7	Down-regulated
Sus_scrofa___ASPN	-2.02719	6.01134	17.3992	0.000306811	0.0231669	3	7	Down-regulated
Sus_scrofa___SLC66A2	-0.962871	6.20789	17.3893	0.000307699	0.0231669	3	7	Down-regulated
Sus_scrofa___ENSSSCG00000031608	-1.31503	8.90571	17.261	0.000320267	0.0237607	3	7	Down-regulated
Sus_scrofa___TMEM52B	-1.68236	4.7368	17.159	0.000331246	0.0243615	3	7	Down-regulated
Sus_scrofa___ASB15	-2.08563	8.19603	17.0916	0.000337768	0.0247683	3	7	Down-regulated
Sus_scrofa___PRRG2	-1.55981	3.93968	17.0329	0.000345094	0.0249092	3	7	Down-regulated
Sus_scrofa___MTARC2	-0.930357	7.151	16.9962	0.000348081	0.0249092	3	7	Down-regulated
Sus_scrofa___CDH9	-3.9304	5.54152	16.88	0.000349384	0.0249092	3	7	Down-regulated
Sus_scrofa___TRIP6	-1.77524	2.50584	16.8624	0.000352275	0.0250372	3	7	Down-regulated
Sus_scrofa___GNPDA2	-1.04059	7.18286	16.9234	0.000356179	0.025244	3	7	Down-regulated
Sus_scrofa___SLC7A7	-2.06021	3.53227	16.8482	0.000362668	0.0256225	3	7	Down-regulated
Sus_scrofa___ZRANB2	-0.986685	8.27315	16.8383	0.000365889	0.0256225	3	7	Down-regulated
Sus_scrofa___ACKR4	-3.81849	2.42166	16.5911	0.000367075	0.0256225	3	7	Down-regulated
Sus_scrofa___PRKCG	-3.52831	3.77053	16.5898	0.000368397	0.0256225	3	7	Down-regulated
Sus_scrofa___ENSSSCG00000043054	-5.10184	-0.629481	15.9658	0.000368589	0.0256225	3	7	Down-regulated
Sus_scrofa___GNAL	-1.20641	3.53078	16.6646	0.000387813	0.0265786	3	7	Down-regulated
Sus_scrofa___RXFP4	-3.25194	2.42665	15.9454	0.000437317	0.0291062	3	7	Down-regulated
Sus_scrofa___ENSSSCG00000011676	-1.83203	6.39204	16.2645	0.000439503	0.0291062	3	7	Down-regulated
Sus_scrofa___HNRNPA1	-0.971107	5.07813	16.259	0.0004405	0.0291062	3	7	Down-regulated
Sus_scrofa___EFHC2	-1.71568	2.96486	16.1277	0.000453058	0.0297809	3	7	Down-regulated
Sus_scrofa___ENSSSCG00000050174	-3.72069	4.9093	16.0681	0.000458379	0.0299568	3	7	Down-regulated
Sus_scrofa___TPGS2	-1.38886	5.33198	16.1302	0.000459274	0.0299568	3	7	Down-regulated
Sus_scrofa___PRKAG3	-1.60098	4.429	16.1235	0.000460936	0.0299568	3	7	Down-regulated
Sus_scrofa___LAMB2	-1.57366	4.5617	16.1202	0.000461479	0.0299568	3	7	Down-regulated
Sus_scrofa___EMC1	-0.953161	3.81928	16.1063	0.000463964	0.0299568	3	7	Down-regulated
Sus_scrofa___CA14	-1.98261	4.86566	16.0983	0.000464623	0.0299568	3	7	Down-regulated
Sus_scrofa___PRKAG1	-0.959214	4.35001	16.0941	0.000465178	0.0299568	3	7	Down-regulated
Sus_scrofa___ADAMTS6	-1.55151	8.90745	16.0695	0.000467957	0.0300357	3	7	Down-regulated
Sus_scrofa___TMEM53	-1.4822	3.51941	16.009	0.000478241	0.0301102	3	7	Down-regulated
Sus_scrofa___CMTM5	-2.84196	7.20603	15.7501	0.000519169	0.0320603	3	7	Down-regulated
Sus_scrofa___EEPD1	-1.1787	5.99135	15.7493	0.000519324	0.0320603	3	7	Down-regulated
Sus_scrofa___USP11	-0.866772	4.49852	15.7288	0.000523392	0.032155	3	7	Down-regulated
Sus_scrofa___MARCHF1	-2.18346	3.43501	15.6322	0.000536883	0.0326523	3	7	Down-regulated
Sus_scrofa___ILF2	-1.44025	3.04145	15.6301	0.00053752	0.0326523	3	7	Down-regulated
Sus_scrofa___GRIP2	-2.86903	5.65216	15.6463	0.000537938	0.0326523	3	7	Down-regulated
Sus_scrofa___ENSSSCG00000041108	-2.97923	1.0852	15.2934	0.000538736	0.0326523	3	7	Down-regulated
Sus_scrofa___FRMD7	-2.31797	1.38799	15.2846	0.000540495	0.0326523	3	7	Down-regulated
Sus_scrofa___TPM2	-1.29128	10.0691	15.574	0.000549877	0.0330435	3	7	Down-regulated
Sus_scrofa___ENSSSCG00000045986	-4.81563	2.19033	15.3366	0.000552016	0.0330435	3	7	Down-regulated
Sus_scrofa___OBSL1	-1.0241	5.38784	15.5624	0.000552179	0.0330435	3	7	Down-regulated
Sus_scrofa___ENSSSCG00000003781	-4.47815	3.32908	15.3021	0.000555511	0.033106	3	7	Down-regulated
Sus_scrofa___ENSSSCG00000033241	-1.55868	3.92269	15.5025	0.000564469	0.0333701	3	7	Down-regulated
Sus_scrofa___ELP1	-0.778134	5.59944	15.4928	0.000564868	0.0333701	3	7	Down-regulated
Sus_scrofa___ENSSSCG00000006213	-1.27232	4.76679	15.4928	0.000565528	0.0333701	3	7	Down-regulated
Sus_scrofa___ENSSSCG00000015036	-1.49208	4.24917	15.3693	0.000589326	0.0343746	3	7	Down-regulated
Sus_scrofa___AP4M1	-1.22275	3.3425	15.2874	0.000604373	0.0348778	3	7	Down-regulated
Sus_scrofa___UQCRQ	-1.4803	6.6072	15.2537	0.000611079	0.0348778	3	7	Down-regulated
Sus_scrofa___ITGA1	-4.81947	3.04859	14.9504	0.000611699	0.0348778	3	7	Down-regulated
Sus_scrofa___ESF1	-0.945073	6.76968	15.2065	0.000620661	0.0351385	3	7	Down-regulated
Sus_scrofa___HABP2	-2.74505	1.87631	14.9355	0.000623493	0.0351385	3	7	Down-regulated
Sus_scrofa___CDK9	-1.04795	4.77398	14.8404	0.000701628	0.0379737	3	7	Down-regulated
Sus_scrofa___MRAS	-1.05538	7.96551	14.8303	0.000703403	0.0379737	3	7	Down-regulated
Sus_scrofa___SLC9A5	-2.30334	1.57767	14.5442	0.000717149	0.0385513	3	7	Down-regulated
Sus_scrofa___CCK	-2.29955	5.83555	14.7617	0.000720482	0.0386486	3	7	Down-regulated
Sus_scrofa___COBLL1	-1.32118	5.98099	14.7446	0.000724013	0.0386745	3	7	Down-regulated
Sus_scrofa___SLC25A29	-1.43393	7.06155	14.6458	0.00074835	0.039394	3	7	Down-regulated
Sus_scrofa___ENSSSCG00000050245	-2.16024	3.31438	14.5819	0.000750284	0.039414	3	7	Down-regulated
Sus_scrofa___NELL1	-1.5239	4.35774	14.6138	0.000757874	0.0395669	3	7	Down-regulated
Sus_scrofa___HPF1	-1.26234	3.61112	14.5859	0.000764906	0.0398521	3	7	Down-regulated
Sus_scrofa___EYA4	-2.40301	6.12295	14.5152	0.000782391	0.0404087	3	7	Down-regulated
Sus_scrofa___ENSSSCG00000051776	-3.28089	1.67891	14.3398	0.000782919	0.0404087	3	7	Down-regulated
Sus_scrofa___NR1I2	-4.48543	2.07041	14.2992	0.000783536	0.0404087	3	7	Down-regulated
Sus_scrofa___RIBC1	-1.7385	2.95195	14.3754	0.000809344	0.041071	3	7	Down-regulated
Sus_scrofa___PANK4	-1.6101	4.66018	14.3778	0.000821035	0.0414983	3	7	Down-regulated
Sus_scrofa___CACNG8	-5.92508	0.0473513	14.1964	0.000832949	0.0417828	3	7	Down-regulated
Sus_scrofa___RIOX2	-1.7637	5.1538	14.2984	0.000842355	0.0417828	3	7	Down-regulated
Sus_scrofa___LMO7	-0.939766	9.8639	14.2699	0.000849722	0.0417828	3	7	Down-regulated
Sus_scrofa___PCSK1N	-2.87973	0.644031	13.8837	0.000850172	0.0417828	3	7	Down-regulated
Sus_scrofa___KCND3	-2.08924	5.66155	14.2687	0.000851237	0.0417828	3	7	Down-regulated
Sus_scrofa___COMMD3	-1.12937	5.2602	14.2648	0.000851741	0.0417828	3	7	Down-regulated
Sus_scrofa___SMTN	-1.34216	5.75049	14.2608	0.000852776	0.0417828	3	7	Down-regulated
Sus_scrofa___ATP2B1	-1.47761	5.47988	14.2596	0.000853013	0.0417828	3	7	Down-regulated
Sus_scrofa___STAP2	-5.07096	-0.0673182	14.1049	0.000865582	0.0422335	3	7	Down-regulated
Sus_scrofa___HOMER1	-0.998678	9.25583	14.2134	0.000866222	0.0422335	3	7	Down-regulated
Sus_scrofa___ENSSSCG00000044774	-3.69705	3.77162	14.0125	0.000872202	0.0422335	3	7	Down-regulated
Sus_scrofa___ALDH2	-2.6754	2.29148	13.9208	0.000886296	0.0424704	3	7	Down-regulated
Sus_scrofa___HAS1	-3.50273	0.825151	13.8118	0.000892397	0.0424704	3	7	Down-regulated
Sus_scrofa___PAICS	-2.19313	2.13501	13.91	0.000894164	0.0424704	3	7	Down-regulated
Sus_scrofa___ENSSSCG00000049530	-2.84671	3.64008	14.0193	0.000902202	0.0424704	3	7	Down-regulated
Sus_scrofa___MUS81	-1.23306	3.50313	14.0831	0.000907632	0.0426469	3	7	Down-regulated
Sus_scrofa___ESYT1	-1.23006	3.45638	14.0573	0.000914771	0.0428238	3	7	Down-regulated
Sus_scrofa___CEP126	-1.01331	7.76451	14.0306	0.000922004	0.0430829	3	7	Down-regulated
Sus_scrofa___ENSSSCG00000038215	-1.51026	2.03079	13.9079	0.000926334	0.0432056	3	7	Down-regulated
Sus_scrofa___ENSSSCG00000048752	-2.2798	4.46031	13.9849	0.000937693	0.0434956	3	7	Down-regulated
Sus_scrofa___SH3KBP1	-1.23659	6.12573	13.9318	0.000953861	0.044049	3	7	Down-regulated
Sus_scrofa___SEMA4C	-1.83529	1.68982	13.6927	0.000954832	0.044049	3	7	Down-regulated
Sus_scrofa___ENSSSCG00000051591	-2.84113	5.09569	13.8857	0.000963482	0.0443674	3	7	Down-regulated
Sus_scrofa___RASGRP2	-2.94636	2.25312	13.6063	0.000973463	0.0444642	3	7	Down-regulated
Sus_scrofa___GPR137C	-1.56538	8.24176	13.8646	0.000976029	0.0444642	3	7	Down-regulated
Sus_scrofa___RNF11	-0.828009	6.8217	13.8644	0.000976098	0.0444642	3	7	Down-regulated
Sus_scrofa___LRCH2	-1.06264	5.26973	13.8581	0.000978528	0.044495	3	7	Down-regulated
Sus_scrofa___TLCD3B	-2.45617	2.35605	13.6435	0.000981585	0.0445541	3	7	Down-regulated
Sus_scrofa___ENSSSCG00000046704	-2.60675	4.23904	13.8197	0.000987656	0.0445835	3	7	Down-regulated
Sus_scrofa___CCL21	-1.97667	3.68339	13.8067	0.000990838	0.0445835	3	7	Down-regulated
Sus_scrofa___ENSSSCG00000046085	-2.26704	2.08211	13.6545	0.000991018	0.0445835	3	7	Down-regulated
Sus_scrofa___CPXM2	-1.95538	3.38299	13.7792	0.000996	0.0447283	3	7	Down-regulated
Sus_scrofa___RYR2	-0.771362	13.9969	13.8005	0.000997812	0.0447305	3	7	Down-regulated
Sus_scrofa___DGKK	-1.809	1.61487	13.5925	0.00100966	0.0451021	3	7	Down-regulated
Sus_scrofa___ENSSSCG00000042419	-6.52955	0.50296	13.8128	0.00101654	0.0453298	3	7	Down-regulated
Sus_scrofa___ENSSSCG00000010310	-1.23396	3.36623	13.7142	0.00102934	0.04566	3	7	Down-regulated
Sus_scrofa___NCF1	-2.79732	2.50102	13.5307	0.00103336	0.0457164	3	7	Down-regulated
Sus_scrofa___PLEKHM3	-0.956143	8.46905	13.6966	0.00103422	0.0457164	3	7	Down-regulated
Sus_scrofa___RAMP1	-0.820529	8.19969	13.6895	0.00103676	0.0457492	3	7	Down-regulated
Sus_scrofa___SLC38A3	-2.05639	3.02502	13.6156	0.00104561	0.0460595	3	7	Down-regulated
Sus_scrofa___ABCA1	-1.68501	7.13793	13.5369	0.0010931	0.0472492	3	7	Down-regulated
Sus_scrofa___ENSSSCG00000012700	-0.99482	7.0771	13.4519	0.00112585	0.0484172	3	7	Down-regulated
Sus_scrofa___DCBLD2	-0.936344	4.49815	13.4447	0.00112983	0.0484674	3	7	Down-regulated
Sus_scrofa___ENSSSCG00000038786	-2.01691	2.31935	13.307	0.00114463	0.0488114	3	7	Down-regulated
Sus_scrofa___NR4A2	-1.74924	5.62501	13.3571	0.00116401	0.0492188	3	7	Down-regulated
Sus_scrofa___MTSS2	-1.00516	5.82056	13.3522	0.00116583	0.0492188	3	7	Down-regulated
Sus_scrofa___ALDOB	-1.73004	2.77003	13.3093	0.00117157	0.0493186	3	7	Down-regulated
Sus_scrofa___ENSSSCG00000043205	-2.99394	2.78718	13.2074	0.00117504	0.0493186	3	7	Down-regulated
Sus_scrofa___ENSSSCG00000050759	-3.68582	2.45548	13.1123	0.00117827	0.0493338	3	7	Down-regulated
Sus_scrofa___SIRT1	-0.759098	5.9264	13.3078	0.001184	0.0494067	3	7	Down-regulated
Sus_scrofa___PNISR	-0.591677	8.77663	13.2869	0.00119255	0.0495232	3	7	Down-regulated
Sus_scrofa___RUFY1	-0.815097	7.05453	13.275	0.00119755	0.0496495	3	7	Down-regulated
Sus_scrofa___ENSSSCG00000051054	-1.5805	3.74939	13.2664	0.00120444	0.0497539	3	7	Down-regulated
Sus_scrofa___SLFN11	-5.73916	-0.266501	12.964	0.00121504	0.049826	3	7	Down-regulated
Sus_scrofa___ROS1	-2.93087	3.90589	13.1736	0.00121552	0.049826	3	7	Down-regulated
Sus_scrofa___CNOT1	-0.690389	6.71486	13.2297	0.00121674	0.049826	3	7	Down-regulated
Sus_scrofa___CNTN1	-1.73197	3.21617	13.2093	0.00121752	0.049826	3	7	Down-regulated
Sus_scrofa___ENSSSCG00000044453	-2.78304	3.72664	13.1786	0.00122331	0.0499022	3	7	Down-regulated
Sus_scrofa___IRGC	-2.58044	0.134815	12.7985	0.0012268	0.0499641	3	7	Down-regulated

## Sheet: Hypoxia_EC
Gene	logFC	logCPM	F	PValue	FDR	Observations_PCMV/PRV	Observations_3month_protocol	level
Sus_scrofa___RGMB	3.98099	8.47353	72.5977	2.22624e-12	3.6693e-08	3	7	Up-regulated
Sus_scrofa___WFDC1	3.98946	7.68425	61.0181	4.93866e-11	4.06995e-07	3	7	Up-regulated
Sus_scrofa___DDIT4	3.0289	8.53169	42.6509	9.8894e-09	5.43324e-05	3	7	Up-regulated
Sus_scrofa___ENSSSCG00000017103	4.19168	6.21948	40.297	1.65099e-08	5.83464e-05	3	7	Up-regulated
Sus_scrofa___GALNT15	3.42957	7.11661	39.7177	2.07764e-08	5.83464e-05	3	7	Up-regulated
Sus_scrofa___RGS2	3.43739	7.77248	40.2579	2.124e-08	5.83464e-05	3	7	Up-regulated
Sus_scrofa___CXCL10	3.86456	6.98606	39.3789	2.88803e-08	6.80006e-05	3	7	Up-regulated
Sus_scrofa___STC1	2.9875	8.70101	38.6929	4.16621e-08	8.58343e-05	3	7	Up-regulated
Sus_scrofa___PLSCR4	3.11292	7.75705	37.3288	5.90879e-08	0.00010821	3	7	Up-regulated
Sus_scrofa___UBE2V2	2.47663	7.89769	33.3333	2.03953e-07	0.000305595	3	7	Up-regulated
Sus_scrofa___TXNIP	2.66125	7.92046	33.0247	2.36877e-07	0.000325351	3	7	Up-regulated
Sus_scrofa___ACKR3	3.28661	7.86273	31.3971	3.50526e-07	0.000385158	3	7	Up-regulated
Sus_scrofa___NETO2	4.41399	6.15244	30.5154	4.98192e-07	0.000483012	3	7	Up-regulated
Sus_scrofa___ENSSSCG00000032436	2.92842	7.18828	30.4397	5.40662e-07	0.000495066	3	7	Up-regulated
Sus_scrofa___SNAPC1	2.7668	7.21095	29.9647	7.10241e-07	0.00058531	3	7	Up-regulated
Sus_scrofa___HACD1	4.11397	5.86018	28.3676	1.11356e-06	0.000873984	3	7	Up-regulated
Sus_scrofa___MAP3K8	2.78185	6.76366	25.2896	3.4922e-06	0.0018194	3	7	Up-regulated
Sus_scrofa___MRC1	2.87449	6.50472	25.0083	3.87527e-06	0.00190145	3	7	Up-regulated
Sus_scrofa___FMO1	2.27813	8.30933	24.6795	5.06289e-06	0.00238419	3	7	Up-regulated
Sus_scrofa___SERPINE1	2.32711	9.73789	24.4934	5.71568e-06	0.00261683	3	7	Up-regulated
Sus_scrofa___FKBP5	1.84512	10.2369	23.9097	6.79283e-06	0.0029463	3	7	Up-regulated
Sus_scrofa___AGMO	2.15442	8.44301	23.4001	7.96469e-06	0.00328185	3	7	Up-regulated
Sus_scrofa___CNNM4	3.83421	5.25098	22.7756	9.19598e-06	0.00352484	3	7	Up-regulated
Sus_scrofa___OGDH	2.72852	7.02501	22.7344	1.02175e-05	0.00381195	3	7	Up-regulated
Sus_scrofa___ZFP36L2	2.33441	7.67682	22.6689	1.04076e-05	0.00381195	3	7	Up-regulated
Sus_scrofa___MPC2	3.11837	5.74774	22.3945	1.0822e-05	0.00387757	3	7	Up-regulated
Sus_scrofa___CDA	2.86859	6.764	21.6849	1.36625e-05	0.00453836	3	7	Up-regulated
Sus_scrofa___PLOD2	2.26634	7.83006	21.8561	1.37676e-05	0.00453836	3	7	Up-regulated
Sus_scrofa___ISG15	2.72518	8.30463	21.8519	1.4441e-05	0.00462084	3	7	Up-regulated
Sus_scrofa___ENSSSCG00000014565	2.51016	7.22249	21.5602	1.53078e-05	0.00470396	3	7	Up-regulated
Sus_scrofa___CCN4	5.92382	4.83241	21.7146	1.80119e-05	0.00520828	3	7	Up-regulated
Sus_scrofa___ENSSSCG00000000231	5.90644	4.98027	21.2336	2.10875e-05	0.005851	3	7	Up-regulated
Sus_scrofa___ISG20	6.00292	5.49539	20.3204	3.22373e-05	0.00805053	3	7	Up-regulated
Sus_scrofa___USP43	2.15658	7.4186	19.4697	3.72195e-05	0.00889062	3	7	Up-regulated
Sus_scrofa___PARD3	1.51643	9.08882	19.2403	4.09904e-05	0.00951555	3	7	Up-regulated
Sus_scrofa___IGF2BP2	1.86524	9.21374	19.2081	4.45197e-05	0.0101913	3	7	Up-regulated
Sus_scrofa___OASL	4.69424	5.38579	18.9998	4.7768e-05	0.0107851	3	7	Up-regulated
Sus_scrofa___ENSSSCG00000039658	2.11979	7.51444	18.2082	6.04768e-05	0.0129452	3	7	Up-regulated
Sus_scrofa___TMCC3	1.6642	8.90915	17.9965	7.05283e-05	0.0149032	3	7	Up-regulated
Sus_scrofa___CCSER2	1.89982	7.83938	17.1538	0.000102124	0.0189404	3	7	Up-regulated
Sus_scrofa___ABHD17B	1.7363	7.61819	17.0267	0.000107698	0.0191378	3	7	Up-regulated
Sus_scrofa___RSAD2	2.39461	8.219	16.4444	0.000130221	0.0216798	3	7	Up-regulated
Sus_scrofa___PTN	3.1076	5.30326	16.1697	0.000137592	0.0224535	3	7	Up-regulated
Sus_scrofa___IFIH1	1.99998	8.32698	16.2368	0.000146217	0.0232266	3	7	Up-regulated
Sus_scrofa___MCFD2	5.18638	5.04368	16.3242	0.000147559	0.0232266	3	7	Up-regulated
Sus_scrofa___LIX1L	3.87775	4.89275	15.7766	0.000174981	0.0259823	3	7	Up-regulated
Sus_scrofa___ENSSSCG00000014672	2.2964	6.80142	15.6683	0.000178324	0.0260066	3	7	Up-regulated
Sus_scrofa___TES	2.4099	6.38136	15.5629	0.000178942	0.0260066	3	7	Up-regulated
Sus_scrofa___TINAGL1	2.28062	6.96329	15.7415	0.000179878	0.0260066	3	7	Up-regulated
Sus_scrofa___ENSSSCG00000035037	2.07228	7.8364	15.611	0.000186586	0.026413	3	7	Up-regulated
Sus_scrofa___PLSCR1	1.70836	7.70279	15.6372	0.000187497	0.026413	3	7	Up-regulated
Sus_scrofa___RAB3GAP1	2.63556	6.14448	15.3843	0.000198269	0.0272323	3	7	Up-regulated
Sus_scrofa___MGMT	1.81641	8.81004	15.5087	0.00020043	0.0273015	3	7	Up-regulated
Sus_scrofa___DTX3L	2.14161	6.87277	15.3384	0.000205416	0.0275804	3	7	Up-regulated
Sus_scrofa___TPI1	2.61753	5.68331	15.1869	0.000213438	0.0282051	3	7	Up-regulated
Sus_scrofa___ENSSSCG00000032591	2.55397	6.20045	15.0738	0.000221601	0.0287843	3	7	Up-regulated
Sus_scrofa___ARRDC2	2.30664	6.49575	14.7934	0.000250702	0.0313036	3	7	Up-regulated
Sus_scrofa___ENSSSCG00000034570	1.98565	8.64754	14.8844	0.000260784	0.0323176	3	7	Up-regulated
Sus_scrofa___CLIP1	1.78706	7.70418	14.7854	0.000267681	0.0328898	3	7	Up-regulated
Sus_scrofa___HSPB1	3.26656	5.67833	14.6511	0.000269393	0.0328898	3	7	Up-regulated
Sus_scrofa___ENSSSCG00000020830	3.72168	5.29683	14.4552	0.000298983	0.035801	3	7	Up-regulated
Sus_scrofa___DCAF6	1.53133	8.29586	14.5221	0.000301926	0.035801	3	7	Up-regulated
Sus_scrofa___ENSSSCG00000017754	1.73282	7.57769	14.3817	0.000317007	0.0365379	3	7	Up-regulated
Sus_scrofa___BTG1	2.1754	6.1542	14.1914	0.000323333	0.0370081	3	7	Up-regulated
Sus_scrofa___ZBTB16	1.67317	10.7322	14.2318	0.000348197	0.0385166	3	7	Up-regulated
Sus_scrofa___RESF1	1.47134	9.35881	14.1423	0.000362343	0.0393519	3	7	Up-regulated
Sus_scrofa___HERC5	2.0224	8.78568	14.1261	0.000362991	0.0393519	3	7	Up-regulated
Sus_scrofa___ENSSSCG00000006395	2.01416	6.60511	13.9278	0.000374996	0.0401343	3	7	Up-regulated
Sus_scrofa___ETV7	2.9014	5.99865	13.7938	0.000387164	0.0411693	3	7	Up-regulated
Sus_scrofa___TRANK1	1.87243	7.29099	13.8139	0.000402079	0.0422107	3	7	Up-regulated
Sus_scrofa___TPT1	1.72947	6.78307	13.8168	0.000405881	0.0422172	3	7	Up-regulated
Sus_scrofa___ACOT11	3.40922	5.37	13.7161	0.000407264	0.0422172	3	7	Up-regulated
Sus_scrofa___FAM13A	1.50522	8.6008	13.7415	0.000419761	0.0427806	3	7	Up-regulated
Sus_scrofa___ENPP1	1.52498	8.81024	13.7247	0.000421966	0.0427806	3	7	Up-regulated
Sus_scrofa___SPCS1	4.95786	4.82501	13.8496	0.000423082	0.0427806	3	7	Up-regulated
Sus_scrofa___SLC9A1	2.37477	6.08445	13.5823	0.000434718	0.0432222	3	7	Up-regulated
Sus_scrofa___PDGFRA	2.37384	5.92155	13.567	0.000435317	0.0432222	3	7	Up-regulated
Sus_scrofa___PSMB4	2.98581	5.32774	13.5463	0.000442801	0.0433683	3	7	Up-regulated
Sus_scrofa___MAML3	1.64382	8.00197	13.6709	0.000443455	0.0433683	3	7	Up-regulated
Sus_scrofa___AGPAT5	1.88577	6.6675	13.5891	0.000444682	0.0433683	3	7	Up-regulated
Sus_scrofa___BNIP3	1.95496	7.32429	13.6342	0.000450757	0.0434466	3	7	Up-regulated
Sus_scrofa___PML	1.6579	8.10993	13.5433	0.000466924	0.0447432	3	7	Up-regulated
Sus_scrofa___PRKAR1A	1.93531	6.3984	13.4958	0.000472416	0.0450078	3	7	Up-regulated
Sus_scrofa___MX1	1.94729	8.12135	13.4847	0.000476822	0.0451666	3	7	Up-regulated
Sus_scrofa___NABP1	2.15596	6.43965	13.3158	0.00049173	0.0460494	3	7	Up-regulated
Sus_scrofa___GABARAPL1	3.27775	5.45745	13.172	0.000524126	0.0487573	3	7	Up-regulated
Sus_scrofa___SFR1	3.04974	5.34803	13.1656	0.000526562	0.0487573	3	7	Up-regulated
Sus_scrofa___LDB2	-3.22967	10.6239	34.8158	1.37721e-07	0.000226991	3	7	Down-regulated
Sus_scrofa___PLXDC2	-2.46983	10.2374	32.7784	2.75198e-07	0.000348908	3	7	Down-regulated
Sus_scrofa___DMD	-3.88713	8.70161	32.4297	2.9675e-07	0.00034936	3	7	Down-regulated
Sus_scrofa___LIMCH1	-4.12421	7.75039	31.3751	3.90166e-07	0.00040192	3	7	Down-regulated
Sus_scrofa___SEMA6A	-3.43089	8.93019	30.3863	5.99083e-07	0.000519689	3	7	Down-regulated
Sus_scrofa___GPR137C	-6.87175	6.16816	27.9563	1.62679e-06	0.00121876	3	7	Down-regulated
Sus_scrofa___LRFN5	-3.68888	6.78636	26.4403	2.40188e-06	0.00166326	3	7	Down-regulated
Sus_scrofa___UCK2	-4.02007	8.18967	26.5895	2.53293e-06	0.00166326	3	7	Down-regulated
Sus_scrofa___AUTS2	-2.39375	10.9416	26.4909	2.57738e-06	0.00166326	3	7	Down-regulated
Sus_scrofa___CDH13	-2.29052	10.7136	26.4415	2.62376e-06	0.00166326	3	7	Down-regulated
Sus_scrofa___SEMA6D	-3.35527	7.5727	26.1679	2.76596e-06	0.00168846	3	7	Down-regulated
Sus_scrofa___FHOD3	-7.11176	6.38123	26.1555	2.98647e-06	0.00175796	3	7	Down-regulated
Sus_scrofa___DACH1	-2.67981	9.54698	25.8913	3.1992e-06	0.00177201	3	7	Down-regulated
Sus_scrofa___ADAM12	-3.06892	8.02211	25.7121	3.22535e-06	0.00177201	3	7	Down-regulated
Sus_scrofa___PCDH7	-4.23771	7.37794	25.7922	3.53239e-06	0.0018194	3	7	Down-regulated
Sus_scrofa___PAMR1	-3.1967	7.33933	25.3848	3.92241e-06	0.00190145	3	7	Down-regulated
Sus_scrofa___TM4SF18	-4.25364	6.26519	23.7919	6.32278e-06	0.00281654	3	7	Down-regulated
Sus_scrofa___CMAH	-2.86873	8.23277	23.6281	7.33758e-06	0.00310098	3	7	Down-regulated
Sus_scrofa___CREB5	-2.69112	8.58449	23.3729	8.19925e-06	0.0032961	3	7	Down-regulated
Sus_scrofa___ADAM19	-4.65514	5.61108	22.8431	8.75827e-06	0.00343699	3	7	Down-regulated
Sus_scrofa___ZNF704	-3.41092	7.13364	22.1118	1.22495e-05	0.00423524	3	7	Down-regulated
Sus_scrofa___HGF	-3.41929	7.09717	22.2849	1.23342e-05	0.00423524	3	7	Down-regulated
Sus_scrofa___MSRB3	-2.94771	8.00399	21.9703	1.45786e-05	0.00462084	3	7	Down-regulated
Sus_scrofa___RYR2	-3.79047	7.95839	21.7518	1.54116e-05	0.00470396	3	7	Down-regulated
Sus_scrofa___RETREG1	-6.64113	6.71091	21.6797	1.68638e-05	0.00505361	3	7	Down-regulated
Sus_scrofa___HSPG2	-2.19537	10.2374	21.4351	1.76891e-05	0.00520627	3	7	Down-regulated
Sus_scrofa___IGF1	-4.62074	6.35116	20.9534	1.92135e-05	0.00545994	3	7	Down-regulated
Sus_scrofa___FHIT	-3.20995	6.78451	20.7134	2.12996e-05	0.005851	3	7	Down-regulated
Sus_scrofa___ENSSSCG00000003909	-2.13722	9.26646	20.8089	2.26259e-05	0.00611344	3	7	Down-regulated
Sus_scrofa___ARHGEF3	-2.10783	9.1446	20.2311	2.84446e-05	0.00756168	3	7	Down-regulated
Sus_scrofa___ENSSSCG00000010626	-6.47854	5.97648	20.1593	2.93349e-05	0.00757629	3	7	Down-regulated
Sus_scrofa___NAALADL2	-3.33392	6.95692	19.9786	2.94868e-05	0.00757629	3	7	Down-regulated
Sus_scrofa___MMP16	-3.28772	6.9399	19.9244	2.98786e-05	0.00757629	3	7	Down-regulated
Sus_scrofa___MEIS2	-4.14111	7.4228	19.7369	3.29366e-05	0.0081024	3	7	Down-regulated
Sus_scrofa___TSPAN5	-2.98159	7.73757	19.5114	3.52002e-05	0.00853191	3	7	Down-regulated
Sus_scrofa___ACTN2	-5.34757	5.94959	19.2457	3.92343e-05	0.00923799	3	7	Down-regulated
Sus_scrofa___ADAMTS7	-5.93885	5.68725	18.7472	5.27529e-05	0.0117496	3	7	Down-regulated
Sus_scrofa___ZNF462	-2.26694	7.46266	18.4909	5.39804e-05	0.0118627	3	7	Down-regulated
Sus_scrofa___ZBTB7C	-4.03362	5.94576	18.3646	5.6371e-05	0.0122251	3	7	Down-regulated
Sus_scrofa___PDE4D	-2.05837	10.2936	17.906	7.31787e-05	0.0152675	3	7	Down-regulated
Sus_scrofa___PARVA	-1.9082	8.73299	17.8454	7.50462e-05	0.0153259	3	7	Down-regulated
Sus_scrofa___ATP1B1	-5.96111	6.23408	17.9565	7.53183e-05	0.0153259	3	7	Down-regulated
Sus_scrofa___SMTN	-2.47522	7.26576	17.6113	8.06839e-05	0.0162175	3	7	Down-regulated
Sus_scrofa___CORO2B	-2.26805	7.32377	17.5898	8.1832e-05	0.0162501	3	7	Down-regulated
Sus_scrofa___P3H2	-3.43929	6.66153	17.3576	8.91765e-05	0.0173422	3	7	Down-regulated
Sus_scrofa___CDH2	-6.04181	5.53753	17.4354	8.94359e-05	0.0173422	3	7	Down-regulated
Sus_scrofa___ENSSSCG00000023479	-3.98016	5.98561	17.1976	9.05605e-05	0.017356	3	7	Down-regulated
Sus_scrofa___RCAN2	-5.00136	6.09505	17.2648	9.32654e-05	0.017669	3	7	Down-regulated
Sus_scrofa___MARCHF8	-5.40141	5.53898	17.0288	0.000102639	0.0189404	3	7	Down-regulated
Sus_scrofa___CTNNA3	-3.69994	6.56837	16.9821	0.000103424	0.0189404	3	7	Down-regulated
Sus_scrofa___FLT4	-3.91991	5.97048	16.9303	0.000107575	0.0191378	3	7	Down-regulated
Sus_scrofa___SLC8A1	-2.59142	9.05194	16.9592	0.000107985	0.0191378	3	7	Down-regulated
Sus_scrofa___LNX1	-3.01963	7.6335	16.7615	0.000114719	0.0200551	3	7	Down-regulated
Sus_scrofa___DLC1	-1.70429	9.37089	16.7882	0.000116707	0.0200551	3	7	Down-regulated
Sus_scrofa___DENND2A	-3.88676	6.13648	16.623	0.000116812	0.0200551	3	7	Down-regulated
Sus_scrofa___ITGA9	-1.93073	8.38638	16.7446	0.000118405	0.0201191	3	7	Down-regulated
Sus_scrofa___SEMA3D	-5.58793	5.23846	16.6209	0.000121077	0.0203632	3	7	Down-regulated
Sus_scrofa___PARD3B	-1.85672	8.95507	16.4017	0.000136598	0.0224535	3	7	Down-regulated
Sus_scrofa___ATRNL1	-3.32858	6.41108	16.1582	0.000146507	0.0232266	3	7	Down-regulated
Sus_scrofa___AK5	-3.29746	6.68093	16.2073	0.000147967	0.0232266	3	7	Down-regulated
Sus_scrofa___ENSSSCG00000014575	-2.99559	6.40146	16.0221	0.000151584	0.0235699	3	7	Down-regulated
Sus_scrofa___SNED1	-2.75246	6.68418	16.0415	0.000154359	0.0237771	3	7	Down-regulated
Sus_scrofa___LURAP1L	-4.4358	5.93169	15.9373	0.000157978	0.0239118	3	7	Down-regulated
Sus_scrofa___SLCO3A1	-4.16544	5.5073	15.9839	0.000158135	0.0239118	3	7	Down-regulated
Sus_scrofa___GRB10	-1.7663	9.62043	15.8515	0.000173103	0.0259371	3	7	Down-regulated
Sus_scrofa___COMMD6	-2.01247	8.78035	15.6627	0.000182552	0.0261637	3	7	Down-regulated
Sus_scrofa___PIEZO2	-3.7166	6.28931	15.4897	0.00019049	0.0266073	3	7	Down-regulated
Sus_scrofa___PDE3A	-2.2654	8.29412	15.527	0.000193911	0.0268575	3	7	Down-regulated
Sus_scrofa___ROBO4	-1.68072	9.48223	15.4488	0.000205824	0.0275804	3	7	Down-regulated
Sus_scrofa___RUNX1T1	-2.00734	8.72408	15.3032	0.000213908	0.0282051	3	7	Down-regulated
Sus_scrofa___THRB	-2.81481	6.44736	15.1763	0.000221794	0.0287843	3	7	Down-regulated
Sus_scrofa___NEXN	-5.20049	5.04619	15.0418	0.000236631	0.0304699	3	7	Down-regulated
Sus_scrofa___SH3PXD2B	-2.79972	7.33843	15.0077	0.000243094	0.0310595	3	7	Down-regulated
Sus_scrofa___CACNA2D1	-2.42977	7.51093	14.9384	0.000247181	0.0313036	3	7	Down-regulated
Sus_scrofa___GASK1B	-1.97998	9.22233	15.0042	0.000248868	0.0313036	3	7	Down-regulated
Sus_scrofa___PREX1	-3.93705	5.95044	14.4825	0.000292271	0.0354207	3	7	Down-regulated
Sus_scrofa___LAMC2	-5.37945	4.89902	14.4278	0.000300175	0.035801	3	7	Down-regulated
Sus_scrofa___GLIS3	-2.79612	6.94264	14.5052	0.000310508	0.0365379	3	7	Down-regulated
Sus_scrofa___INPP4B	-1.88515	8.54774	14.4643	0.000313492	0.0365379	3	7	Down-regulated
Sus_scrofa___ZNF423	-1.72695	8.37205	14.4574	0.000315078	0.0365379	3	7	Down-regulated
Sus_scrofa___PPARGC1A	-5.94718	5.00596	14.476	0.000333038	0.0376671	3	7	Down-regulated
Sus_scrofa___ACSS1	-5.21144	5.18696	14.2787	0.000333661	0.0376671	3	7	Down-regulated
Sus_scrofa___DNAH11	-3.87915	5.19016	14.0711	0.000340623	0.0381914	3	7	Down-regulated
Sus_scrofa___FHL2	-5.48325	4.97012	14.1794	0.000343668	0.0382725	3	7	Down-regulated
Sus_scrofa___COL15A1	-3.08376	7.83759	14.1623	0.000353096	0.0387982	3	7	Down-regulated
Sus_scrofa___SNTB1	-2.5949	7.25873	14.0767	0.000365298	0.0393519	3	7	Down-regulated
Sus_scrofa___ITIH5	-3.61085	5.9123	13.8543	0.000393928	0.04162	3	7	Down-regulated
Sus_scrofa___TRAF1	-3.97044	5.52974	13.7858	0.00041465	0.0427141	3	7	Down-regulated
Sus_scrofa___FILIP1	-1.99217	9.17133	13.7399	0.000431895	0.0432222	3	7	Down-regulated
Sus_scrofa___LDLRAD3	-2.41986	7.9822	13.6081	0.000449023	0.0434466	3	7	Down-regulated
Sus_scrofa___MID1	-2.40911	6.62773	13.466	0.000487743	0.045937	3	7	Down-regulated

## Sheet: Cap_EC_ISG
Gene	logFC	logCPM	F	PValue	FDR	Observations_PCMV/PRV	Observations_3month_protocol	level
Sus_scrofa___WFDC1	4.713	8.4046	57.1897	6.96875e-13	9.87751e-09	3	6	Up-regulated
Sus_scrofa___RGMB	3.43301	9.10824	51.5585	8.21939e-12	4.71223e-08	3	6	Up-regulated
Sus_scrofa___STC1	3.89024	8.94375	50.9495	9.97368e-12	4.71223e-08	3	6	Up-regulated
Sus_scrofa___TINAGL1	5.65439	7.66437	44.4231	1.74365e-10	6.17861e-07	3	6	Up-regulated
Sus_scrofa___PLSCR4	3.40384	8.26412	40.6697	8.42086e-10	2.38715e-06	3	6	Up-regulated
Sus_scrofa___FMO1	3.12067	9.12221	38.6384	2.13523e-09	5.04413e-06	3	6	Up-regulated
Sus_scrofa___MRC1	5.27328	7.13713	36.249	6.07663e-09	1.07663e-05	3	6	Up-regulated
Sus_scrofa___ADAMTS6	3.12432	8.91991	35.7898	7.67146e-09	1.20817e-05	3	6	Up-regulated
Sus_scrofa___ZBTB16	2.63244	10.7479	35.4329	8.97735e-09	1.27245e-05	3	6	Up-regulated
Sus_scrofa___FKBP5	2.4698	10.1642	35.121	1.03263e-08	1.30356e-05	3	6	Up-regulated
Sus_scrofa___UBE2V2	3.24874	8.12523	34.5624	1.29661e-08	1.4137e-05	3	6	Up-regulated
Sus_scrofa___TMCC3	2.73815	9.11009	33.6743	1.96959e-08	1.99407e-05	3	6	Up-regulated
Sus_scrofa___DCAF6	2.82501	8.49818	32.1928	3.79719e-08	3.58809e-05	3	6	Up-regulated
Sus_scrofa___CCSER2	3.11349	8.19474	31.8438	4.40328e-08	3.6713e-05	3	6	Up-regulated
Sus_scrofa___CHRM2	4.47916	7.28556	30.8023	7.35276e-08	5.78989e-05	3	6	Up-regulated
Sus_scrofa___KIT	2.43375	9.69718	28.3125	2.30704e-07	0.000172105	3	6	Up-regulated
Sus_scrofa___CXCL10	2.52025	9.02502	28.0176	2.64626e-07	0.00017477	3	6	Up-regulated
Sus_scrofa___DDIT4	3.05641	8.38989	27.9271	2.71266e-07	0.00017477	3	6	Up-regulated
Sus_scrofa___ENSSSCG00000039658	3.86256	7.06815	26.758	4.60753e-07	0.000246727	3	6	Up-regulated
Sus_scrofa___GALNT15	4.20018	7.04627	26.7738	4.6999e-07	0.000246727	3	6	Up-regulated
Sus_scrofa___PLVAP	2.26231	9.39877	26.3186	5.82533e-07	0.000294886	3	6	Up-regulated
Sus_scrofa___MPC2	4.18479	6.87767	25.965	6.86228e-07	0.0003354	3	6	Up-regulated
Sus_scrofa___TXNIP	2.19773	9.0072	23.5334	2.16182e-06	0.000988441	3	6	Up-regulated
Sus_scrofa___CNKSR3	2.11302	9.32996	23.2048	2.53443e-06	0.00105656	3	6	Up-regulated
Sus_scrofa___DENND5B	2.45744	8.6983	22.735	3.14752e-06	0.00127466	3	6	Up-regulated
Sus_scrofa___ENSSSCG00000017103	5.83442	6.33109	22.6478	3.39151e-06	0.00133531	3	6	Up-regulated
Sus_scrofa___ZFAND5	5.85965	6.60062	22.5098	3.55227e-06	0.00133867	3	6	Up-regulated
Sus_scrofa___PLPP1	1.84356	11.1124	22.4773	3.58893e-06	0.00133867	3	6	Up-regulated
Sus_scrofa___MGMT	2.21601	8.68248	21.9142	4.68871e-06	0.00170405	3	6	Up-regulated
Sus_scrofa___TRNP1	5.79524	6.69328	21.8628	4.87649e-06	0.00172798	3	6	Up-regulated
Sus_scrofa___SLC16A1	4.32069	6.65036	20.9913	7.35187e-06	0.00248108	3	6	Up-regulated
Sus_scrofa___SLC38A2	2.46639	7.97665	20.6422	8.56689e-06	0.00276655	3	6	Up-regulated
Sus_scrofa___HACD1	5.66382	6.30437	20.6843	8.58814e-06	0.00276655	3	6	Up-regulated
Sus_scrofa___PRR16	4.5228	6.50254	20.5654	9.00114e-06	0.00281028	3	6	Up-regulated
Sus_scrofa___AGMO	2.10198	8.74489	20.4849	9.28095e-06	0.00281028	3	6	Up-regulated
Sus_scrofa___SLC9A1	5.64295	6.43029	20.502	9.31868e-06	0.00281028	3	6	Up-regulated
Sus_scrofa___CEMIP2	2.01273	9.50554	20.4012	9.71937e-06	0.00287005	3	6	Up-regulated
Sus_scrofa___GPR161	2.41493	8.10625	19.4222	1.55376e-05	0.0044945	3	6	Up-regulated
Sus_scrofa___ENSSSCG00000014565	1.96991	8.81695	19.3163	1.63833e-05	0.00464434	3	6	Up-regulated
Sus_scrofa___CLIP1	2.68642	7.58524	19.197	1.71476e-05	0.00467405	3	6	Up-regulated
Sus_scrofa___MCC	1.67302	11.0256	19.1012	1.82489e-05	0.00488038	3	6	Up-regulated
Sus_scrofa___ENSSSCG00000010893	2.27354	8.44946	19.0239	1.889e-05	0.00495828	3	6	Up-regulated
Sus_scrofa___ITGAV	2.71188	7.92181	18.9033	2.00478e-05	0.0051665	3	6	Up-regulated
Sus_scrofa___ABHD17B	2.20234	7.99219	18.8307	2.06273e-05	0.00517339	3	6	Up-regulated
Sus_scrofa___CCN4	5.46578	6.10549	18.8065	2.12639e-05	0.00517339	3	6	Up-regulated
Sus_scrofa___ZFP36L2	2.40171	8.09869	18.7498	2.15345e-05	0.00517339	3	6	Up-regulated
Sus_scrofa___MPZL1	3.07918	7.10892	18.6303	2.25507e-05	0.00532722	3	6	Up-regulated
Sus_scrofa___OAZ1	5.45837	6.21184	18.5406	2.4141e-05	0.00560942	3	6	Up-regulated
Sus_scrofa___ST3GAL6	2.22331	7.97432	18.0546	3.02112e-05	0.00673917	3	6	Up-regulated
Sus_scrofa___SORBS2	2.05716	9.36515	18.0495	3.04294e-05	0.00673917	3	6	Up-regulated
Sus_scrofa___ENAH	2.55209	7.72511	17.8604	3.30047e-05	0.00719705	3	6	Up-regulated
Sus_scrofa___RGS2	5.37373	6.44839	17.8327	3.37688e-05	0.0072521	3	6	Up-regulated
Sus_scrofa___ENSSSCG00000038187	2.90335	7.13545	17.4573	4.02746e-05	0.00849049	3	6	Up-regulated
Sus_scrofa___ENSSSCG00000006231	2.11825	8.42641	17.4482	4.07332e-05	0.00849049	3	6	Up-regulated
Sus_scrofa___RESF1	1.72285	9.74188	17.2524	4.50779e-05	0.00925991	3	6	Up-regulated
Sus_scrofa___RUNX2	2.86357	7.27683	16.7592	5.69557e-05	0.0113703	3	6	Up-regulated
Sus_scrofa___PNPLA8	4.01421	6.80882	16.7088	5.85603e-05	0.0114227	3	6	Up-regulated
Sus_scrofa___GAPDH	2.50393	7.31036	16.6909	5.88386e-05	0.0114227	3	6	Up-regulated
Sus_scrofa___ARHGEF26	1.89565	8.7042	16.6816	5.96357e-05	0.0114227	3	6	Up-regulated
Sus_scrofa___HCLS1	5.23131	6.36971	16.5923	6.26805e-05	0.0116899	3	6	Up-regulated
Sus_scrofa___OGDH	3.162	6.94402	16.3877	6.83851e-05	0.0124268	3	6	Up-regulated
Sus_scrofa___ACKR2	2.96123	6.93352	16.3448	6.95103e-05	0.0124714	3	6	Up-regulated
Sus_scrofa___EMP1	1.87761	8.68882	16.2017	7.54122e-05	0.0132548	3	6	Up-regulated
Sus_scrofa___USP15	1.78332	9.09444	16.1996	7.5747e-05	0.0132548	3	6	Up-regulated
Sus_scrofa___ENSSSCG00000035037	2.79112	7.5746	15.9614	8.4362e-05	0.0145213	3	6	Up-regulated
Sus_scrofa___CLIC5	1.62555	10.1119	15.9676	8.50335e-05	0.0145213	3	6	Up-regulated
Sus_scrofa___ITGA5	3.46869	6.8045	15.7596	9.40702e-05	0.0158732	3	6	Up-regulated
Sus_scrofa___ATP13A3	2.58737	7.34012	15.6201	0.000100079	0.016384	3	6	Up-regulated
Sus_scrofa___TMTC2	1.66146	9.73816	15.6298	0.000100565	0.016384	3	6	Up-regulated
Sus_scrofa___ZNF410	3.90644	6.83895	15.5909	0.000101984	0.0164264	3	6	Up-regulated
Sus_scrofa___JAG1	1.84739	8.71611	15.4814	0.000108181	0.0169145	3	6	Up-regulated
Sus_scrofa___RPL28	2.35175	7.41931	15.466	0.000108254	0.0169145	3	6	Up-regulated
Sus_scrofa___HDAC5	5.13632	6.31737	15.4879	0.000108595	0.0169145	3	6	Up-regulated
Sus_scrofa___AHI1	2.61351	7.04696	15.4084	0.000110998	0.0171009	3	6	Up-regulated
Sus_scrofa___CD9	2.66105	7.21921	15.3427	0.000115427	0.017592	3	6	Up-regulated
Sus_scrofa___SNAPC1	2.60189	7.06876	15.2819	0.000119029	0.017948	3	6	Up-regulated
Sus_scrofa___ENSSSCG00000027046	3.46821	7.22808	15.0267	0.000135063	0.0200122	3	6	Up-regulated
Sus_scrofa___ZFY	3.95348	7.05482	15.017	0.00013618	0.0200122	3	6	Up-regulated
Sus_scrofa___PLOD2	2.24394	7.62848	14.9825	0.000137759	0.0200122	3	6	Up-regulated
Sus_scrofa___OASL	2.97398	7.10312	14.9766	0.000138859	0.0200122	3	6	Up-regulated
Sus_scrofa___DGKI	2.63956	7.39373	14.9042	0.000143576	0.0200122	3	6	Up-regulated
Sus_scrofa___TBC1D32	2.9096	6.83647	14.9045	0.000143765	0.0200122	3	6	Up-regulated
Sus_scrofa___PTN	3.34006	6.40245	14.8986	0.000144014	0.0200122	3	6	Up-regulated
Sus_scrofa___RAB3GAP1	3.86189	6.68733	14.8661	0.000147717	0.0200373	3	6	Up-regulated
Sus_scrofa___TNFSF4	5.0563	6.4393	14.8459	0.000149721	0.0200373	3	6	Up-regulated
Sus_scrofa___IVNS1ABP	3.06457	7.34884	14.8047	0.000151205	0.0200373	3	6	Up-regulated
Sus_scrofa___DES	3.55296	6.47679	14.7944	0.000151459	0.0200373	3	6	Up-regulated
Sus_scrofa___KLHL36	5.03681	6.15989	14.8016	0.000151755	0.0200373	3	6	Up-regulated
Sus_scrofa___NOL11	1.41084	11.3559	14.7924	0.000152676	0.0200373	3	6	Up-regulated
Sus_scrofa___SERPINE1	2.43912	7.76555	14.6971	0.000159696	0.0207664	3	6	Up-regulated
Sus_scrofa___ISG15	1.61678	9.44796	14.6523	0.000163717	0.0210957	3	6	Up-regulated
Sus_scrofa___SIK3	1.90299	8.51214	14.5942	0.000168188	0.0214765	3	6	Up-regulated
Sus_scrofa___ENSSSCG00000035904	1.96897	7.94753	14.5638	0.000170269	0.0215481	3	6	Up-regulated
Sus_scrofa___TPI1	3.75787	6.38791	14.3034	0.0001954	0.0242947	3	6	Up-regulated
Sus_scrofa___MAP3K8	2.30832	7.53449	14.2647	0.00019771	0.0243681	3	6	Up-regulated
Sus_scrofa___TMEM165	3.22086	6.61086	14.1613	0.000208223	0.0254427	3	6	Up-regulated
Sus_scrofa___ERC1	1.68247	9.07446	14.0515	0.000220849	0.0265281	3	6	Up-regulated
Sus_scrofa___CD80	4.98357	6.02362	13.8776	0.000242582	0.0288219	3	6	Up-regulated
Sus_scrofa___SELENOF	2.76077	6.87565	13.8481	0.000244012	0.0288219	3	6	Up-regulated
Sus_scrofa___OSBPL3	5.01373	6.27928	13.7347	0.000260981	0.0305715	3	6	Up-regulated
Sus_scrofa___SERTAD1	3.27516	6.40183	13.6715	0.000267591	0.0307612	3	6	Up-regulated
Sus_scrofa___DPH5	4.9077	6.11884	13.6686	0.000269663	0.0307612	3	6	Up-regulated
Sus_scrofa___MTCH1	3.01194	6.92366	13.6317	0.000271282	0.0307612	3	6	Up-regulated
Sus_scrofa___EHD4	1.97075	8.38352	13.4191	0.000303848	0.0339113	3	6	Up-regulated
Sus_scrofa___ENSSSCG00000033310	2.09627	7.63189	13.2859	0.000324678	0.035953	3	6	Up-regulated
Sus_scrofa___CNNM4	4.86358	6.2217	13.2646	0.000329738	0.0362303	3	6	Up-regulated
Sus_scrofa___CPNE3	3.16707	6.34519	13.0526	0.000364788	0.0391705	3	6	Up-regulated
Sus_scrofa___UBAP1	2.36329	7.21904	13.0335	0.00036878	0.0393014	3	6	Up-regulated
Sus_scrofa___RSAD2	1.5683	9.71873	12.9717	0.000381892	0.0403951	3	6	Up-regulated
Sus_scrofa___MAFF	3.58768	6.38451	12.728	0.000430717	0.0448895	3	6	Up-regulated
Sus_scrofa___FBXL17	1.59123	8.75397	12.6917	0.000439183	0.0454378	3	6	Up-regulated
Sus_scrofa___IGF2BP2	1.58838	8.92614	12.6498	0.000449359	0.0461537	3	6	Up-regulated
Sus_scrofa___PPP2R5A	1.63489	8.69618	12.5609	0.000470484	0.0479758	3	6	Up-regulated
Sus_scrofa___TEX10	1.97718	7.51555	12.4825	0.000487948	0.0494012	3	6	Up-regulated
Sus_scrofa___PCDH7	-5.42386	7.04743	37.5175	3.43175e-09	6.94881e-06	3	6	Down-regulated
Sus_scrofa___DMD	-3.62474	8.25108	34.9651	1.10362e-08	1.30356e-05	3	6	Down-regulated
Sus_scrofa___LNX1	-3.69096	7.96747	31.9559	4.27207e-08	3.6713e-05	3	6	Down-regulated
Sus_scrofa___LRP1B	-5.7848	7.51926	28.2109	2.45476e-07	0.000173969	3	6	Down-regulated
Sus_scrofa___IL33	-5.07493	6.92755	27.784	2.96957e-07	0.000183003	3	6	Down-regulated
Sus_scrofa___TSPAN18	-2.98072	8.85434	27.6058	3.20345e-07	0.00018919	3	6	Down-regulated
Sus_scrofa___VWF	-2.48783	9.69863	27.1727	3.92426e-07	0.00022249	3	6	Down-regulated
Sus_scrofa___FLRT2	-2.96212	8.57567	25.1085	1.03031e-06	0.000486789	3	6	Down-regulated
Sus_scrofa___VCAM1	-3.76607	6.80078	23.3056	2.40536e-06	0.00105656	3	6	Down-regulated
Sus_scrofa___MEOX1	-4.56704	6.54216	23.1961	2.53014e-06	0.00105656	3	6	Down-regulated
Sus_scrofa___TTN	-2.21444	10.0033	21.6769	5.27345e-06	0.00182307	3	6	Down-regulated
Sus_scrofa___HMCN1	-2.00904	10.8748	19.2424	1.70379e-05	0.00467405	3	6	Down-regulated
Sus_scrofa___SEMA6A	-2.33077	9.44084	18.7837	2.13039e-05	0.00517339	3	6	Down-regulated
Sus_scrofa___DNAH11	-3.80084	6.37627	18.0299	3.03815e-05	0.00673917	3	6	Down-regulated
Sus_scrofa___ZNF704	-4.12855	7.09827	16.8602	5.44284e-05	0.011021	3	6	Down-regulated
Sus_scrofa___CDH13	-1.79269	10.5598	16.6375	6.10324e-05	0.0115343	3	6	Down-regulated
Sus_scrofa___ADAMTSL3	-2.98435	6.72988	16.4347	6.66851e-05	0.0122753	3	6	Down-regulated
Sus_scrofa___AUTS2	-1.66923	10.9802	15.6704	9.85434e-05	0.016384	3	6	Down-regulated
Sus_scrofa___ADGRG6	-2.59612	7.38771	14.9471	0.000140837	0.0200122	3	6	Down-regulated
Sus_scrofa___ADAMTS12	-2.81446	6.79456	14.3523	0.000188833	0.023686	3	6	Down-regulated
Sus_scrofa___PAMR1	-2.45577	7.36281	14.14	0.000210978	0.0255589	3	6	Down-regulated
Sus_scrofa___ENSSSCG00000029771	-2.91147	6.64764	13.6721	0.000265869	0.0307612	3	6	Down-regulated
Sus_scrofa___TM4SF18	-3.75545	6.4461	13.5611	0.00028158	0.0316755	3	6	Down-regulated
Sus_scrofa___LRFN5	-2.20339	7.56491	13.2075	0.000338516	0.0369087	3	6	Down-regulated
Sus_scrofa___CMAH	-1.95351	8.64966	13.159	0.000347421	0.0375905	3	6	Down-regulated
Sus_scrofa___SLC8A1	-1.96206	8.95408	12.8836	0.000399531	0.0419478	3	6	Down-regulated
Sus_scrofa___CYP26B1	-2.67189	6.53216	12.459	0.000495189	0.0497788	3	6	Down-regulated

## Sheet: vCM4
Gene	logFC	logCPM	F	PValue	FDR	Observations_PCMV/PRV	Observations_3month_protocol	level
Sus_scrofa___OAS2	5.07465	6.3942	102.582	2.47524e-14	1.90187e-10	3	7	Up-regulated
Sus_scrofa___ISG12(A)	6.26371	6.47396	95.7784	2.50377e-14	1.90187e-10	3	7	Up-regulated
Sus_scrofa___ANO6	5.14032	5.7363	87.863	9.36061e-14	4.74021e-10	3	7	Up-regulated
Sus_scrofa___SETX	3.42243	6.29337	82.5777	2.9797e-12	1.03371e-08	3	7	Up-regulated
Sus_scrofa___ENSSSCG00000001229	4.40568	5.67838	74.9044	3.49156e-12	1.03371e-08	3	7	Up-regulated
Sus_scrofa___ZDHHC14	5.76427	4.84158	75.5462	4.08259e-12	1.03371e-08	3	7	Up-regulated
Sus_scrofa___IFIT1	4.96785	5.41018	71.6763	5.9192e-12	1.28463e-08	3	7	Up-regulated
Sus_scrofa___RSAD2	5.66929	5.09454	70.8179	1.87047e-11	3.55202e-08	3	7	Up-regulated
Sus_scrofa___MX1	5.13946	5.61665	58.998	1.16057e-10	1.95904e-07	3	7	Up-regulated
Sus_scrofa___ISG15	4.79256	5.79612	51.8373	1.95802e-09	2.97463e-06	3	7	Up-regulated
Sus_scrofa___FOXS1	7.54008	4.31574	53.5927	4.52131e-09	6.24434e-06	3	7	Up-regulated
Sus_scrofa___HERC5	4.89555	4.83314	44.7009	5.6079e-09	7.0996e-06	3	7	Up-regulated
Sus_scrofa___IFI44	3.6336	6.01816	44.6002	1.44808e-08	1.57137e-05	3	7	Up-regulated
Sus_scrofa___ENSSSCG00000017146	3.25862	6.3152	45.2232	1.59482e-08	1.61315e-05	3	7	Up-regulated
Sus_scrofa___STAC2	3.48462	6.37101	45.8494	1.69895e-08	1.61315e-05	3	7	Up-regulated
Sus_scrofa___MX2	8.16742	4.64258	48.4126	2.74731e-08	2.45513e-05	3	7	Up-regulated
Sus_scrofa___DDX60	4.24553	5.65108	41.101	3.71981e-08	3.13952e-05	3	7	Up-regulated
Sus_scrofa___B2M	2.43119	6.83257	38.5273	1.09124e-07	6.90758e-05	3	7	Up-regulated
Sus_scrofa___ENSSSCG00000032436	7.00905	4.00476	38.9805	1.16314e-07	7.06816e-05	3	7	Up-regulated
Sus_scrofa___PARP12	3.49686	5.65309	36.3269	1.34867e-07	7.6083e-05	3	7	Up-regulated
Sus_scrofa___SH3RF2	5.28635	4.89768	37.4315	1.35219e-07	7.6083e-05	3	7	Up-regulated
Sus_scrofa___ENO1	2.08717	6.77395	35.9636	2.29401e-07	0.000120174	3	7	Up-regulated
Sus_scrofa___ENSSSCG00000034610	4.21488	4.54495	33.1173	2.61764e-07	0.000132557	3	7	Up-regulated
Sus_scrofa___CMPK2	4.83387	4.55889	33.2115	4.28621e-07	0.000203488	3	7	Up-regulated
Sus_scrofa___FBXO39	2.09581	6.58826	31.9966	7.70616e-07	0.000354764	3	7	Up-regulated
Sus_scrofa___MTPN	1.62292	6.94001	31.3048	9.52223e-07	0.000425102	3	7	Up-regulated
Sus_scrofa___STAT1	2.53413	7.38931	31.2251	9.79368e-07	0.000425102	3	7	Up-regulated
Sus_scrofa___H3-5	2.43134	6.81635	30.9145	1.07896e-06	0.000445236	3	7	Up-regulated
Sus_scrofa___NLRC5	2.81792	6.43114	30.0959	1.19029e-06	0.000475865	3	7	Up-regulated
Sus_scrofa___TRANK1	2.56582	5.45287	29.9358	1.29811e-06	0.000505665	3	7	Up-regulated
Sus_scrofa___ENSSSCG00000034570	3.3218	6.76334	30.265	1.63788e-06	0.000622068	3	7	Up-regulated
Sus_scrofa___ENSSSCG00000045769	6.58151	3.85312	28.9486	2.10368e-06	0.000756179	3	7	Up-regulated
Sus_scrofa___NCAM1	1.60884	9.89261	28.7557	2.14032e-06	0.000756179	3	7	Up-regulated
Sus_scrofa___CDC14A	1.86137	7.39904	27.5055	3.25846e-06	0.00112506	3	7	Up-regulated
Sus_scrofa___FBN2	2.85429	6.48777	26.6558	4.17444e-06	0.00134932	3	7	Up-regulated
Sus_scrofa___IFIH1	3.05115	5.94417	25.6391	4.84991e-06	0.001535	3	7	Up-regulated
Sus_scrofa___PARP14	4.89594	4.08461	25.1932	6.18407e-06	0.00187897	3	7	Up-regulated
Sus_scrofa___USP18	2.89883	6.05932	24.9284	6.70926e-06	0.00194523	3	7	Up-regulated
Sus_scrofa___EIF4EBP1	4.00764	4.44003	24.5522	6.75467e-06	0.00194523	3	7	Up-regulated
Sus_scrofa___NPPB	3.12861	7.20407	24.8729	7.04237e-06	0.00194523	3	7	Up-regulated
Sus_scrofa___BST2	6.19203	3.60812	26.5902	7.56044e-06	0.00201506	3	7	Up-regulated
Sus_scrofa___TXNIP	1.89712	8.29659	24.7371	8.27088e-06	0.0021664	3	7	Up-regulated
Sus_scrofa___GSR	2.34299	5.87197	24.2384	8.92549e-06	0.00225993	3	7	Up-regulated
Sus_scrofa___AKAP7	2.23885	6.17897	24.1312	1.01616e-05	0.00245039	3	7	Up-regulated
Sus_scrofa___IFI44L	2.88504	6.42922	23.5018	1.17429e-05	0.002703	3	7	Up-regulated
Sus_scrofa___NPPA	3.83261	5.08243	22.5367	1.2377e-05	0.00280643	3	7	Up-regulated
Sus_scrofa___IFIT5	3.2213	4.61071	22.3772	1.33216e-05	0.00297621	3	7	Up-regulated
Papio_anubis_HBB	6.47325	3.78266	23.8188	1.59842e-05	0.00337266	3	7	Up-regulated
Sus_scrofa___SERPINE1	2.82567	5.94948	22.0243	1.74477e-05	0.00363104	3	7	Up-regulated
Sus_scrofa___IGF2BP2	1.57725	6.67534	22.4698	1.84519e-05	0.00378813	3	7	Up-regulated
Sus_scrofa___MYL7	2.99901	6.26786	21.954	2.05207e-05	0.0040487	3	7	Up-regulated
Sus_scrofa___ABCG2	2.25388	5.06789	21.0974	2.56127e-05	0.00482588	3	7	Up-regulated
Sus_scrofa___MOB3B	2.68035	4.9295	20.4937	2.57304e-05	0.00482588	3	7	Up-regulated
Sus_scrofa___NXN	2.38634	5.92838	21.0646	2.96634e-05	0.00542948	3	7	Up-regulated
Sus_scrofa___EZR	1.6753	6.82548	20.637	3.57933e-05	0.00639732	3	7	Up-regulated
Sus_scrofa___EPSTI1	2.66618	5.89634	20.1843	3.93859e-05	0.00664834	3	7	Up-regulated
Sus_scrofa___ZNF536	2.44591	4.41752	19.4793	4.0773e-05	0.00680686	3	7	Up-regulated
Sus_scrofa___SLC12A6	1.59395	7.1662	20.1131	4.35774e-05	0.00711858	3	7	Up-regulated
Sus_scrofa___ENSSSCG00000015645	1.8456	6.26141	20.0102	4.46987e-05	0.00715708	3	7	Up-regulated
Sus_scrofa___ENSSSCG00000036669	1.55615	7.14185	20.0258	4.49891e-05	0.00715708	3	7	Up-regulated
Sus_scrofa___LGALS1	5.94567	3.72241	20.4355	4.68644e-05	0.00733984	3	7	Up-regulated
Sus_scrofa___ENSSSCG00000002950	1.38764	6.82371	19.5524	5.36809e-05	0.00823758	3	7	Up-regulated
Sus_scrofa___SP110	4.52569	3.8487	19.0588	5.52659e-05	0.008396	3	7	Up-regulated
Sus_scrofa___LIN54	1.73585	5.99978	19.3187	5.72895e-05	0.00861725	3	7	Up-regulated
Sus_scrofa___TRAF3IP2	1.43872	6.85206	19.1667	6.20838e-05	0.00915706	3	7	Up-regulated
Sus_scrofa___IFIT2	4.37783	4.03606	18.226	7.01661e-05	0.010152	3	7	Up-regulated
Sus_scrofa___HERC6	2.64355	6.47736	18.5418	7.08443e-05	0.0101535	3	7	Up-regulated
Sus_scrofa___PIR	3.60309	3.9912	17.8875	8.27202e-05	0.0114244	3	7	Up-regulated
Sus_scrofa___SLC20A2	1.33708	8.99907	18.1807	8.98406e-05	0.0120041	3	7	Up-regulated
Sus_scrofa___MGMT	1.56915	7.19845	17.8778	0.000101327	0.013157	3	7	Up-regulated
Sus_scrofa___ASAP1	1.1951	7.87579	17.7548	0.000106008	0.0135518	3	7	Up-regulated
Sus_scrofa___ZNFX1	2.08314	5.34895	17.6171	0.000106152	0.0135518	3	7	Up-regulated
Sus_scrofa___FLNB	3.09063	4.09164	16.8976	0.000110418	0.0137929	3	7	Up-regulated
Sus_scrofa___EIF2AK3	1.4417	6.64158	17.6515	0.000110764	0.0137929	3	7	Up-regulated
Sus_scrofa___ENSSSCG00000022322	1.85738	5.88391	17.582	0.00011263	0.0138393	3	7	Up-regulated
Sus_scrofa___TRIM26	2.3762	4.40498	16.9094	0.000113857	0.0138393	3	7	Up-regulated
Sus_scrofa___DES	1.51055	9.57004	17.5519	0.000114474	0.0138393	3	7	Up-regulated
Sus_scrofa___MOSPD1	1.73045	5.6222	17.4789	0.000114781	0.0138393	3	7	Up-regulated
Sus_scrofa___WWC1	1.85723	5.80631	17.4246	0.000117672	0.0139736	3	7	Up-regulated
Sus_scrofa___PLSCR1	2.89134	4.47779	16.5946	0.00013227	0.0152329	3	7	Up-regulated
Sus_scrofa___KCNMA1	1.25988	8.20864	17.018	0.000141112	0.0159301	3	7	Up-regulated
Sus_scrofa___MLLT11	2.45259	4.62661	16.474	0.000141559	0.0159301	3	7	Up-regulated
Sus_scrofa___DTX3L	4.08132	3.95742	16.4384	0.000150768	0.0167187	3	7	Up-regulated
Sus_scrofa___EIF2AK2	2.40789	7.81807	16.7833	0.00015489	0.0170514	3	7	Up-regulated
Sus_scrofa___ZC3HAV1	2.37452	5.4881	16.6221	0.000156918	0.0171503	3	7	Up-regulated
Sus_scrofa___SH3PXD2A	1.67987	6.69495	16.566	0.00016898	0.0183367	3	7	Up-regulated
Sus_scrofa___MAGI1	1.39017	8.62739	16.4634	0.000175406	0.018766	3	7	Up-regulated
Sus_scrofa___PSMB7	1.52662	6.0569	16.3866	0.000178347	0.0188156	3	7	Up-regulated
Sus_scrofa___DENND3	2.99083	4.15469	15.6641	0.000185586	0.0194443	3	7	Up-regulated
Sus_scrofa___ROBO1	2.03307	6.85476	16.2054	0.000194514	0.0201024	3	7	Up-regulated
Sus_scrofa___IRF7	3.33572	3.71588	15.601	0.000206032	0.0208669	3	7	Up-regulated
Sus_scrofa___CEP112	1.57932	6.18553	16.0065	0.000209871	0.0209761	3	7	Up-regulated
Sus_scrofa___ADAR	1.76032	5.6556	15.9111	0.000215567	0.0212655	3	7	Up-regulated
Sus_scrofa___UVRAG	1.1068	8.43142	15.8809	0.000221118	0.0216724	3	7	Up-regulated
Sus_scrofa___H1-3	5.46557	3.75659	15.7877	0.000229158	0.0221743	3	7	Up-regulated
Sus_scrofa___ENSSSCG00000005453	2.66589	4.24657	15.2164	0.000239564	0.0230345	3	7	Up-regulated
Sus_scrofa___SND1	1.5019	6.74427	15.5278	0.000255566	0.0241153	3	7	Up-regulated
Sus_scrofa___PARP9	4.26785	4.1414	15.5315	0.000259033	0.0242916	3	7	Up-regulated
Sus_scrofa___RAD51B	1.31584	7.801	15.4575	0.000262377	0.0244325	3	7	Up-regulated
Sus_scrofa___AFF2	3.64356	3.80273	14.9825	0.000301051	0.0268405	3	7	Up-regulated
Sus_scrofa___ENSSSCG00000014280	1.24473	7.73557	15.1079	0.000302115	0.0268405	3	7	Up-regulated
Sus_scrofa___CPNE5	1.95659	5.21267	15.0281	0.00030719	0.0269759	3	7	Up-regulated
Sus_scrofa___SNX24	1.29153	7.10171	15.0266	0.000312843	0.0270642	3	7	Up-regulated
Sus_scrofa___DENND5B	1.05851	9.96152	14.9209	0.000325451	0.0276817	3	7	Up-regulated
Sus_scrofa___LOXL2	1.8478	5.7573	14.8154	0.00032616	0.0276817	3	7	Up-regulated
Sus_scrofa___PSMD14	1.39354	6.65303	14.8975	0.000329216	0.0277858	3	7	Up-regulated
Sus_scrofa___IMPA1	2.49333	4.79192	14.2864	0.000355597	0.0295204	3	7	Up-regulated
Sus_scrofa___FKBP5	1.55844	8.70839	14.6535	0.000363113	0.0298184	3	7	Up-regulated
Sus_scrofa___PML	2.35299	5.65675	14.5637	0.000366513	0.0299359	3	7	Up-regulated
Sus_scrofa___ENSSSCG00000016263	5.07211	3.31927	14.8895	0.000378958	0.0307868	3	7	Up-regulated
Sus_scrofa___HMOX2	1.25643	7.19345	14.3906	0.000405396	0.0327134	3	7	Up-regulated
Sus_scrofa___AMOTL1	1.8653	5.63904	14.2967	0.00040698	0.0327134	3	7	Up-regulated
Sus_scrofa___UCK2	1.4866	7.35849	14.2167	0.000435172	0.034433	3	7	Up-regulated
Sus_scrofa___WBP1L	1.50029	5.92454	14.173	0.000438644	0.0345279	3	7	Up-regulated
Sus_scrofa___CHD3	2.33439	4.47775	13.6314	0.00046742	0.0362298	3	7	Up-regulated
Sus_scrofa___SERGEF	1.79986	5.70485	13.7166	0.000522505	0.0394811	3	7	Up-regulated
Sus_scrofa___PTP4A1	1.84634	5.26894	13.675	0.000524092	0.0394811	3	7	Up-regulated
Sus_scrofa___RANBP17	1.65448	5.6011	13.712	0.000524959	0.0394811	3	7	Up-regulated
Sus_scrofa___NUDCD1	2.29387	5.76257	13.5736	0.000542972	0.0404354	3	7	Up-regulated
Sus_scrofa___TERF2IP	1.9159	5.53333	13.4092	0.000572807	0.0422431	3	7	Up-regulated
Sus_scrofa___ENSSSCG00000023324	1.09125	7.40446	13.5116	0.000583154	0.0427984	3	7	Up-regulated
Sus_scrofa___BNIP3L	1.87789	5.29348	13.2883	0.000614693	0.0444686	3	7	Up-regulated
Sus_scrofa___IRF2	1.30743	6.98059	13.3411	0.000626892	0.0449233	3	7	Up-regulated
Sus_scrofa___PMM1	3.78443	3.78801	13.1311	0.000656936	0.0466363	3	7	Up-regulated
Sus_scrofa___PTGER4	4.76202	3.57015	13.34	0.000663842	0.0469074	3	7	Up-regulated
Sus_scrofa___ANKRD2	2.67602	4.06811	12.782	0.000673489	0.0473687	3	7	Up-regulated
Sus_scrofa___JCHAIN	1.75969	5.23673	13.0118	0.000678568	0.047506	3	7	Up-regulated
Sus_scrofa___TEP1	1.64688	5.20669	12.9855	0.00068843	0.0477589	3	7	Up-regulated
Sus_scrofa___ENSSSCG00000013366	2.06817	4.50846	12.6839	0.000721708	0.0496117	3	7	Up-regulated
Sus_scrofa___ENOX1	-3.02072	9.48206	46.9238	1.06915e-08	1.24943e-05	3	7	Down-regulated
Sus_scrofa___ENSSSCG00000036052	-2.14998	9.69895	41.6077	4.48045e-08	3.58247e-05	3	7	Down-regulated
Sus_scrofa___ACTC1	-3.99959	8.05422	40.0798	6.73276e-08	5.11421e-05	3	7	Down-regulated
Sus_scrofa___ZNF804B	-2.58564	9.21081	39.7622	7.54009e-08	5.45472e-05	3	7	Down-regulated
Sus_scrofa___ACOT11	-2.77028	8.26495	39.2817	8.66629e-08	5.98447e-05	3	7	Down-regulated
Sus_scrofa___CMTM5	-4.35882	7.02519	38.4442	9.41024e-08	6.21567e-05	3	7	Down-regulated
Sus_scrofa___TENM2	-3.20193	10.2232	37.1674	1.59112e-07	8.63294e-05	3	7	Down-regulated
Sus_scrofa___CRYBG3	-2.20027	10.2501	34.0166	4.07378e-07	0.000199642	3	7	Down-regulated
Sus_scrofa___ENSSSCG00000015747	-2.79356	10.1104	30.871	1.08437e-06	0.000445236	3	7	Down-regulated
Sus_scrofa___NAALADL2	-1.90504	7.65647	29.1232	1.91032e-06	0.000707844	3	7	Down-regulated
Sus_scrofa___ADAMTS6	-2.38742	8.56947	27.193	3.59392e-06	0.00121331	3	7	Down-regulated
Sus_scrofa___GPR137C	-2.15925	8.15111	26.7958	4.10628e-06	0.00134932	3	7	Down-regulated
Sus_scrofa___ASB15	-2.67767	8.13467	25.9801	5.39181e-06	0.00167168	3	7	Down-regulated
Sus_scrofa___FHL2	-1.92635	11.567	25.295	6.81356e-06	0.00194523	3	7	Down-regulated
Sus_scrofa___JADE1	-2.01091	8.40594	25.2189	7.01314e-06	0.00194523	3	7	Down-regulated
Sus_scrofa___AASS	-4.55748	5.50818	24.7993	7.26565e-06	0.00197107	3	7	Down-regulated
Sus_scrofa___AUTS2	-1.92131	8.96181	24.5627	8.79022e-06	0.00225993	3	7	Down-regulated
Sus_scrofa___MYH6	-3.23161	9.7858	24.453	9.12442e-06	0.00227243	3	7	Down-regulated
Sus_scrofa___ADAMTSL1	-2.54064	7.83817	24.341	9.40455e-06	0.00230442	3	7	Down-regulated
Sus_scrofa___ZBTB7C	-4.84199	5.80635	23.6993	1.03326e-05	0.00245271	3	7	Down-regulated
Sus_scrofa___MYLK3	-1.7553	8.67128	23.9527	1.0863e-05	0.00253894	3	7	Down-regulated
Sus_scrofa___STXBP6	-2.14092	8.20806	23.3054	1.36415e-05	0.00300351	3	7	Down-regulated
Sus_scrofa___ADRA1A	-4.06046	6.8655	22.9415	1.43205e-05	0.00307213	3	7	Down-regulated
Sus_scrofa___ISM1	-4.76995	5.12427	22.7637	1.43576e-05	0.00307213	3	7	Down-regulated
Sus_scrofa___FYB2	-2.78329	6.05652	22.199	1.89018e-05	0.00382874	3	7	Down-regulated
Sus_scrofa___MYBPC3	-1.53766	10.8995	22.2485	1.98474e-05	0.0039674	3	7	Down-regulated
Sus_scrofa___ENSSSCG00000012700	-1.80308	7.18084	21.9663	2.20046e-05	0.00428582	3	7	Down-regulated
Sus_scrofa___NAV2	-1.71101	9.78543	21.6576	2.45694e-05	0.0047248	3	7	Down-regulated
Sus_scrofa___MYOCD	-1.47105	10.7216	21.2218	2.87829e-05	0.00533255	3	7	Down-regulated
Sus_scrofa___EYA4	-3.38964	6.07835	20.8024	3.0233e-05	0.00546785	3	7	Down-regulated
Sus_scrofa___TPM2	-1.53117	10.1166	20.5677	3.65929e-05	0.00646418	3	7	Down-regulated
Sus_scrofa___LRRTM3	-2.22164	9.81024	20.5142	3.73282e-05	0.00651828	3	7	Down-regulated
Sus_scrofa___LMCD1	-3.65978	6.41798	20.2556	3.80612e-05	0.00657074	3	7	Down-regulated
Sus_scrofa___RAMP1	-1.51332	8.25033	20.3859	3.91963e-05	0.00664834	3	7	Down-regulated
Sus_scrofa___KLHL31	-1.65077	7.55924	20.1144	4.33929e-05	0.00711858	3	7	Down-regulated
Sus_scrofa___NOL7	-3.24476	5.40985	19.737	4.52264e-05	0.00715708	3	7	Down-regulated
Sus_scrofa___CORIN	-1.75249	9.80298	19.6101	5.2244e-05	0.00809889	3	7	Down-regulated
Sus_scrofa___MMP11	-3.16685	6.83389	19.0841	6.17027e-05	0.00915706	3	7	Down-regulated
Sus_scrofa___FSD2	-2.10724	6.94803	18.8585	6.89565e-05	0.010073	3	7	Down-regulated
Sus_scrofa___ENSSSCG00000031608	-1.57964	8.87085	18.7279	7.29184e-05	0.010353	3	7	Down-regulated
Sus_scrofa___MAML3	-1.81979	7.42328	18.4796	8.02665e-05	0.0112908	3	7	Down-regulated
Sus_scrofa___CCDC141	-1.36494	10.2123	18.4144	8.21215e-05	0.0114244	3	7	Down-regulated
Sus_scrofa___RNF207	-1.97688	7.00825	18.3298	8.41893e-05	0.0115226	3	7	Down-regulated
Sus_scrofa___ASPN	-1.94209	6.18942	18.1687	8.82697e-05	0.0119732	3	7	Down-regulated
Sus_scrofa___ABCA1	-2.28082	7.21868	18.1734	9.00782e-05	0.0120041	3	7	Down-regulated
Sus_scrofa___KCND3	-2.86951	6.07347	17.801	9.26621e-05	0.0122411	3	7	Down-regulated
Sus_scrofa___SMYD3	-1.92088	9.59288	18.0134	9.5784e-05	0.0125444	3	7	Down-regulated
Sus_scrofa___GFM1	-1.35892	8.4672	17.6703	0.000109439	0.0137929	3	7	Down-regulated
Sus_scrofa___GRB14	-1.56752	7.12243	17.4785	0.000117734	0.0139736	3	7	Down-regulated
Sus_scrofa___PLEKHM3	-1.40241	8.27892	17.2199	0.000130479	0.0152329	3	7	Down-regulated
Sus_scrofa___IHO1	-2.83429	5.08974	16.9218	0.000130596	0.0152329	3	7	Down-regulated
Sus_scrofa___ENSSSCG00000011676	-2.12189	6.47156	17.1628	0.000132356	0.0152329	3	7	Down-regulated
Sus_scrofa___CCK	-2.76433	6.32848	16.9838	0.000138141	0.0157792	3	7	Down-regulated
Sus_scrofa___LMO7	-1.2543	9.81085	16.9854	0.000142764	0.0159476	3	7	Down-regulated
Sus_scrofa___TXNDC16	-1.62349	7.41451	16.5262	0.000171342	0.0184611	3	7	Down-regulated
Sus_scrofa___CEP85L	-1.96459	6.47514	16.4048	0.000178341	0.0188156	3	7	Down-regulated
Sus_scrofa___TPGS2	-3.02688	5.54809	16.1019	0.000189174	0.0196844	3	7	Down-regulated
Sus_scrofa___RORA	-1.31269	9.42443	16.1581	0.000197907	0.0203149	3	7	Down-regulated
Sus_scrofa___ENSSSCG00000039331	-3.17749	5.29571	15.9073	0.000200617	0.0204548	3	7	Down-regulated
Sus_scrofa___ENSSSCG00000051591	-6.04105	5.42894	15.9736	0.000209026	0.0209761	3	7	Down-regulated
Sus_scrofa___ENPEP	-4.04782	4.81894	15.7324	0.000213077	0.0211572	3	7	Down-regulated
Sus_scrofa___LRRC9	-2.38137	6.53349	15.7665	0.000226696	0.0220767	3	7	Down-regulated
Sus_scrofa___MYLIP	-2.70406	5.42348	15.4736	0.000246216	0.0234632	3	7	Down-regulated
Sus_scrofa___SRSF5	-1.42933	7.42838	15.605	0.000247111	0.0234632	3	7	Down-regulated
Sus_scrofa___TMEM120B	-1.4267	7.23992	15.4395	0.000263753	0.0244325	3	7	Down-regulated
Sus_scrofa___SELENOP	-2.49413	5.47126	15.2912	0.000266514	0.0245386	3	7	Down-regulated
Sus_scrofa___MTSS2	-1.92232	5.94565	15.2996	0.000270761	0.0247796	3	7	Down-regulated
Sus_scrofa___CA14	-3.2706	5.32564	15.1104	0.000276558	0.0251585	3	7	Down-regulated
Sus_scrofa___PXYLP1	-1.77156	6.85618	15.2108	0.000288608	0.0260984	3	7	Down-regulated
Sus_scrofa___ENPP1	-1.68997	7.6842	15.1705	0.000294546	0.0264778	3	7	Down-regulated
Sus_scrofa___GRM5	-2.69381	5.80283	14.9494	0.000305376	0.0269725	3	7	Down-regulated
Sus_scrofa___ENSSSCG00000003839	-1.63887	7.62366	15.0511	0.000309141	0.0269912	3	7	Down-regulated
Sus_scrofa___SYN3	-2.35098	6.77608	15.0019	0.000313539	0.0270642	3	7	Down-regulated
Sus_scrofa___ENSSSCG00000050174	-5.49324	4.75845	14.7938	0.000320152	0.0274788	3	7	Down-regulated
Sus_scrofa___PLXNA4	-1.25532	8.15708	14.8135	0.000340381	0.0285695	3	7	Down-regulated
Sus_scrofa___TRDN	-1.64002	10.1437	14.734	0.000351215	0.0293168	3	7	Down-regulated
Sus_scrofa___ENSSSCG00000010626	-1.84252	11.5349	14.6703	0.000360446	0.0297603	3	7	Down-regulated
Sus_scrofa___ADAMTS3	-2.28433	6.06233	14.2264	0.000414563	0.0331476	3	7	Down-regulated
Sus_scrofa___MAPRE2	-1.49166	8.55355	14.2657	0.000425836	0.0338706	3	7	Down-regulated
Sus_scrofa___NR4A3	-3.11968	8.35172	14.1008	0.000456441	0.0357415	3	7	Down-regulated
Sus_scrofa___BMP5	-2.37052	6.47205	14.028	0.000458767	0.0357415	3	7	Down-regulated
Sus_scrofa___GGCX	-2.05461	6.52461	14.0027	0.00047165	0.0363722	3	7	Down-regulated
Sus_scrofa___MAP3K3	-2.26454	5.32849	13.8769	0.000474496	0.0364068	3	7	Down-regulated
Sus_scrofa___DOCK3	-1.21161	8.95972	13.9348	0.000488085	0.0372612	3	7	Down-regulated
Sus_scrofa___ITGB6	-2.00117	8.46483	13.6814	0.00054276	0.0404354	3	7	Down-regulated
Sus_scrofa___SLC9B2	-1.2973	9.06356	13.6043	0.000559929	0.0414948	3	7	Down-regulated
Sus_scrofa___PRRG2	-3.51895	4.53925	13.2817	0.000594669	0.0434337	3	7	Down-regulated
Sus_scrofa___MCCC2	-1.56722	7.14018	13.4479	0.00059829	0.0434891	3	7	Down-regulated
Sus_scrofa___SH3KBP1	-1.75924	6.16049	13.3198	0.000621767	0.0447672	3	7	Down-regulated
Sus_scrofa___ASPDH	-1.54738	11.1336	13.2462	0.00065039	0.0463884	3	7	Down-regulated
Sus_scrofa___PNISR	-1.00563	8.76293	13.1122	0.000688467	0.0477589	3	7	Down-regulated
Sus_scrofa___RBFOX1	-1.11957	9.62308	13.0765	0.000698629	0.0482435	3	7	Down-regulated

[truncated: 7 more sheets: vCM3, Unassigned_CM, vCM5, Prolif_vCM, Myo_vFB, Mural_cells, Hypoxia_vFB]
