# Supplementary material for: Integrated Molecular Profiling of Preclinical and Clinical Cardiac Xenotransplants
Source: Research Square preprint supplement (doi:10.21203/rs.3.rs-8406985/v1), 2026-02-04
Supplement: Supplementary file 6 [file 32a86446e335f56c8f16f864.xlsx]

## Sheet: Sheet1
Condition	cell_states	N_cells	S_score_median	G2M_score_median	Proportion_G1	Proportion_S	Proportion_G2M
Control	Angiogenic_EC	94	-0.00583608	-0.0304295	0.5	0.37234	0.12766
Control	Hypoxia_EC	69	-0.00609319	-0.0268669	0.463768	0.376812	0.15942
Control	Arterial_EC	104	-0.00893585	-0.0359109	0.576923	0.336538	0.0865385
Control	Cap_EC	523	-0.00565822	-0.0332326	0.499044	0.40153	0.0994264
Control	Cap_EC_ISG	88	-0.00604729	-0.0289218	0.431818	0.454545	0.113636
Control	Meso_EC	85	-0.00648089	-0.0405542	0.529412	0.376471	0.0941176
Control	NFkB_EC	10	-0.0106681	-0.0351428	0.5	0.4	0.1
Control	Antiinflamm_EC	300	-0.00684847	-0.0335698	0.526667	0.39	0.0833333
Control	Prolif_EC	24	0.137897	0.0945961	0.0833333	0.583333	0.333333
PCMV/PRV	Angiogenic_EC	58	0.00307393	-0.0270392	0.362069	0.5	0.137931
PCMV/PRV	Hypoxia_EC	379	-0.000205385	-0.0337121	0.459103	0.467018	0.0738786
PCMV/PRV	Arterial_EC	38	-0.00500968	-0.0478812	0.526316	0.473684	0
PCMV/PRV	Cap_EC	96	-0.00277629	-0.0312273	0.510417	0.427083	0.0625
PCMV/PRV	Cap_EC_ISG	266	-0.00596228	-0.0397066	0.526316	0.43609	0.037594
PCMV/PRV	EC_PCMV/PRV_sus	39	0.0759601	-0.0026261	0.128205	0.74359	0.128205
PCMV/PRV	Meso_EC	44	-0.00438163	-0.042064	0.545455	0.363636	0.0909091
PCMV/PRV	NFkB_EC	10	-0.0195363	-0.0324736	0.8	0.2	0
PCMV/PRV	Antiinflamm_EC	62	-0.00907552	-0.0425752	0.532258	0.387097	0.0806452
PCMV/PRV	Prolif_EC	6	0.0787443	-0.0249805	0.166667	0.833333	0
Prematurely terminated	Angiogenic_EC	143	-0.00686389	-0.0302681	0.559441	0.363636	0.0769231
Prematurely terminated	Hypoxia_EC	386	-0.00616404	-0.0282576	0.556995	0.354922	0.0880829
Prematurely terminated	Arterial_EC	75	-0.00935314	-0.0286574	0.68	0.306667	0.0133333
Prematurely terminated	Cap_EC	387	-0.00785148	-0.0297682	0.630491	0.320413	0.0490956
Prematurely terminated	Cap_EC_ISG	79	-0.00513613	-0.0265318	0.455696	0.367089	0.177215
Prematurely terminated	Meso_EC	38	-0.00820284	-0.0367181	0.631579	0.263158	0.105263
Prematurely terminated	NFkB_EC	4	0.00196196	-0.0395158	0.5	0.5	0
Prematurely terminated	Antiinflamm_EC	310	-0.006082	-0.0336426	0.529032	0.377419	0.0935484
Prematurely terminated	Prolif_EC	46	0.0426868	0.168533	0	0.195652	0.804348
Rejection	Angiogenic_EC	152	-0.00435051	-0.028472	0.427632	0.453947	0.118421
Rejection	Hypoxia_EC	685	-0.00594356	-0.0339951	0.557664	0.378102	0.0642336
Rejection	Arterial_EC	140	-0.0111357	-0.0373228	0.635714	0.314286	0.05
Rejection	Cap_EC	180	-4.37787e-05	-0.0331121	0.433333	0.466667	0.1
Rejection	Cap_EC_ISG	210	-0.00192078	-0.0366011	0.504762	0.442857	0.052381
Rejection	EC_PCMV/PRV_sus	1	0.077062	-0.0278714	0	1	0
Rejection	Meso_EC	50	-0.00659065	-0.0448547	0.66	0.24	0.1
Rejection	NFkB_EC	14	-0.00206536	-0.028415	0.428571	0.5	0.0714286
Rejection	Antiinflamm_EC	203	-0.00774372	-0.0432496	0.605911	0.344828	0.0492611
Rejection	Prolif_EC	84	0.105177	0.131213	0.0119048	0.464286	0.52381
6-month protocol	Angiogenic_EC	65	0	-0.0280533	0.369231	0.507692	0.123077
6-month protocol	Hypoxia_EC	364	-0.000599253	-0.0352839	0.414835	0.467033	0.118132
6-month protocol	Arterial_EC	27	-0.0131144	-0.0241267	0.481481	0.407407	0.111111
6-month protocol	Cap_EC	37	-0.00509192	-0.0424724	0.486486	0.432432	0.0810811
6-month protocol	Cap_EC_ISG	99	0.0035979	-0.0380182	0.484848	0.484848	0.030303
6-month protocol	Meso_EC	31	-0.00381774	-0.0265184	0.483871	0.387097	0.129032
6-month protocol	NFkB_EC	10	-0.0108407	-0.0415751	0.6	0.3	0.1
6-month protocol	Antiinflamm_EC	106	-0.00315747	-0.0355672	0.433962	0.471698	0.0943396
6-month protocol	Prolif_EC	44	0.150425	0.106322	0	0.659091	0.340909
3-month protocol	Angiogenic_EC	196	-0.00975809	-0.0295862	0.484694	0.362245	0.153061
3-month protocol	Hypoxia_EC	416	-0.00593249	-0.0303572	0.490385	0.389423	0.120192
3-month protocol	Arterial_EC	149	-0.00460692	-0.0364279	0.463087	0.463087	0.0738255
3-month protocol	Cap_EC	336	-0.00658873	-0.0310737	0.482143	0.416667	0.10119
3-month protocol	Cap_EC_ISG	167	-0.00464918	-0.0370184	0.491018	0.431138	0.0778443
3-month protocol	Meso_EC	136	-0.0110952	-0.0419458	0.610294	375	0.0147059
3-month protocol	NFkB_EC	31	-0.0204759	-0.0289834	0.645161	0.290323	0.0645161
3-month protocol	Antiinflamm_EC	408	-0.00725442	-0.0375487	0.551471	0.384804	0.0637255
3-month protocol	Prolif_EC	116	0.0951503	0.119429	0	0.456897	0.543103
