# Supplementary material for: Integrated Molecular Profiling of Preclinical and Clinical Cardiac Xenotransplants
Source: Research Square preprint supplement (doi:10.21203/rs.3.rs-8406985/v1), 2026-02-04
Supplement: Supplementary file 8 [file 3e9455b30dbdaab02fe21622.xlsx]

## Sheet: NK_CD16hi_papio
Gene	logFC	logCPM	F	PValue	FDR	Observations_6month_protocol	Observations_3month_protocol	level
Papio_anubis_CD226	2.747	7.77086	20.3405	6.57207e-06	0.0449289	3	6	Up-regulated
Papio_anubis_CD83	-5.33114	7.53503	20.2523	6.88143e-06	0.0449289	3	6	Down-regulated

## Sheet: Unassigned_FB
Gene	logFC	logCPM	F	PValue	FDR	Observations_6month_protocol	Observations_3month_protocol	level
Sus_scrofa___GRIK2	4.69742	5.23611	45.9056	1.53694e-08	0.000295493	3	7	Up-regulated
Sus_scrofa___MAP7	4.41932	5.39244	34.8797	3.49471e-07	0.00335947	3	7	Up-regulated
Sus_scrofa___TBC1D8	2.26259	6.43042	34.4085	7.97709e-07	0.00511225	3	7	Up-regulated
Sus_scrofa___RIMS1	3.58271	4.80873	25.746	5.96244e-06	0.0270441	3	7	Up-regulated
Sus_scrofa___KLHL32	3.87293	4.49241	25.4957	7.03321e-06	0.0270441	3	7	Up-regulated

## Sheet: vFB4
Gene	logFC	logCPM	F	PValue	FDR	Observations_6month_protocol	Observations_3month_protocol	level
Sus_scrofa___THSD7B	4.69799	5.14334	29.6269	2.53223e-06	0.0218379	3	6	Up-regulated
Sus_scrofa___SHISA9	6.70183	5.78443	29.5567	5.09844e-06	0.0293126	3	6	Up-regulated
Sus_scrofa___CA10	-3.56888	7.71503	37.194	8.53954e-07	0.014729	3	6	Down-regulated

## Sheet: vFB3
Gene	logFC	logCPM	F	PValue	FDR	Observations_6month_protocol	Observations_3month_protocol	level
Sus_scrofa___DLGAP1	2.51606	6.72439	33.1582	1.24989e-06	0.0206845	3	6	Up-regulated
Sus_scrofa___DDX60	5.14507	6.35124	28.9621	2.99949e-06	0.0236938	3	6	Up-regulated
Sus_scrofa___MX2	4.69648	7.5746	27.7021	4.29521e-06	0.0236938	3	6	Up-regulated

## Sheet: vCM2_ISG
Gene	logFC	logCPM	F	PValue	FDR	Observations_6month_protocol	Observations_3month_protocol	level
Sus_scrofa___ENSSSCG00000014672	5.22372	2.33141	88.5407	1.96835e-11	2.42361e-07	3	7	Up-regulated
Sus_scrofa___ANKRD37	4.44084	2.50679	122.54	2.18593e-11	2.42361e-07	3	7	Up-regulated
Sus_scrofa___ISG20	6.71171	2.28936	86.2831	3.00795e-11	2.42361e-07	3	7	Up-regulated
Sus_scrofa___ETV7	5.53025	2.3851	80.7491	5.36647e-11	3.24296e-07	3	7	Up-regulated
Sus_scrofa___ENSSSCG00000016263	5.71277	3.83301	89.5805	2.20379e-10	1.0654e-06	3	7	Up-regulated
Sus_scrofa___ENSSSCG00000049674	4.91966	2.28719	79.4155	4.44637e-10	1.78046e-06	3	7	Up-regulated
Sus_scrofa___HES4	6.84848	1.90405	85.9838	5.15605e-10	1.78046e-06	3	7	Up-regulated
Sus_scrofa___ENO1	1.98614	6.58113	83.3463	1.63222e-09	4.93174e-06	3	7	Up-regulated
Sus_scrofa___ENSSSCG00000031163	5.82131	1.19937	58.3903	2.61804e-09	6.02384e-06	3	7	Up-regulated
Sus_scrofa___UBE2L6	5.815	3.81283	65.4368	2.81151e-09	6.02384e-06	3	7	Up-regulated
Sus_scrofa___TRIM22	6.32432	1.64423	69.8939	2.89246e-09	6.02384e-06	3	7	Up-regulated
Sus_scrofa___MX2	8.20255	6.86673	74.2254	3.06721e-09	6.02384e-06	3	7	Up-regulated
Sus_scrofa___BNIP3	2.38325	5.54044	77.719	3.23969e-09	6.02384e-06	3	7	Up-regulated
Sus_scrofa___BST2	7.24148	4.15937	71.4932	3.63409e-09	6.27452e-06	3	7	Up-regulated
Sus_scrofa___CTSH	2.99226	4.06855	76.1585	4.01892e-09	6.47636e-06	3	7	Up-regulated
Sus_scrofa___OASL	4.89862	2.98803	67.7941	5.07257e-09	7.66339e-06	3	7	Up-regulated
Sus_scrofa___FOXS1	6.61459	5.38425	66.765	6.00678e-09	8.54093e-06	3	7	Up-regulated
Sus_scrofa___SNAPC1	1.49193	6.59841	70.1258	8.67225e-09	1.16459e-05	3	7	Up-regulated
Sus_scrofa___ENSSSCG00000028691	3.50911	3.27511	68.3543	1.15843e-08	1.47376e-05	3	7	Up-regulated
Sus_scrofa___SAMD9	5.15979	1.53022	51.8674	1.66231e-08	2.00907e-05	3	7	Up-regulated
Sus_scrofa___CXCL11	5.96867	1.51678	52.4056	1.80792e-08	2.081e-05	3	7	Up-regulated
Sus_scrofa___ADM	4.50543	1.58671	53.3602	2.06666e-08	2.25815e-05	3	7	Up-regulated
Sus_scrofa___HERC5	5.33763	6.90318	63.8596	2.14866e-08	2.25815e-05	3	7	Up-regulated
Sus_scrofa___CCDC194	4.11538	1.48272	50.3128	2.81768e-08	2.83788e-05	3	7	Up-regulated
Sus_scrofa___HIF1A	1.50417	6.67974	61.0331	3.1545e-08	2.88467e-05	3	7	Up-regulated
Sus_scrofa___C20orf96	3.65448	2.27817	58.0601	3.2379e-08	2.88467e-05	3	7	Up-regulated
Sus_scrofa___HLA-DOB	6.30152	1.34944	55.8727	3.27065e-08	2.88467e-05	3	7	Up-regulated
Sus_scrofa___EDN1	5.97573	2.51412	48.163	3.3415e-08	2.88467e-05	3	7	Up-regulated
Sus_scrofa___UBD	6.3714	1.86125	46.9977	3.79315e-08	3.1455e-05	3	7	Up-regulated
Sus_scrofa___RNF19B	2.93539	5.76384	59.6329	3.9039e-08	3.1455e-05	3	7	Up-regulated
Sus_scrofa___SHFL	6.9722	1.02053	54.6509	4.28556e-08	3.34163e-05	3	7	Up-regulated
Sus_scrofa___ENSSSCG00000025593	5.22239	2.50372	47.3966	4.70438e-08	3.55357e-05	3	7	Up-regulated
Sus_scrofa___IFI35	3.9198	0.73709	43.5763	6.40796e-08	4.63804e-05	3	7	Up-regulated
Sus_scrofa___CD109	2.04847	3.78823	56.4039	6.5238e-08	4.63804e-05	3	7	Up-regulated
Sus_scrofa___PLEKHA4	3.74493	4.8893	56.0836	6.86184e-08	4.73898e-05	3	7	Up-regulated
Sus_scrofa___ENSSSCG00000016868	4.43265	0.501497	42.2321	7.63889e-08	5.12819e-05	3	7	Up-regulated
Sus_scrofa___PSMB8	6.12286	2.46288	50.425	7.8497e-08	5.12819e-05	3	7	Up-regulated
Sus_scrofa___GCA	3.21559	1.46038	48.3387	9.70548e-08	6.17371e-05	3	7	Up-regulated
Sus_scrofa___MX1	5.60206	6.83017	48.0589	1.69126e-07	0.000104824	3	7	Up-regulated
Sus_scrofa___OAS2	4.92145	7.37753	50.2068	1.7882e-07	0.000108061	3	7	Up-regulated
Sus_scrofa___ENSSSCG00000001398	4.39143	2.16227	42.6301	1.84693e-07	0.000108888	3	7	Up-regulated
Sus_scrofa___BATF2	4.24563	1.07229	39.5519	1.93421e-07	0.000111318	3	7	Up-regulated
Sus_scrofa___ENSSSCG00000036618	4.34706	0.18879	37.9	2.03536e-07	0.000114416	3	7	Up-regulated
Sus_scrofa___TTC9	4.33691	1.49616	41.8662	2.51895e-07	0.000138382	3	7	Up-regulated
Sus_scrofa___ZBP1	6.28754	1.36644	43.8966	2.62202e-07	0.000140843	3	7	Up-regulated
Sus_scrofa___ENSSSCG00000032436	6.95019	2.80634	41.5728	2.72565e-07	0.000143227	3	7	Up-regulated
Sus_scrofa___TRIB3	3.92218	1.36516	41.7831	2.88125e-07	0.000148182	3	7	Up-regulated
Sus_scrofa___ETV5	3.88913	2.5953	46.8128	3.02709e-07	0.000152439	3	7	Up-regulated
Sus_scrofa___UPP1	3.56574	2.42028	44.8611	3.22463e-07	0.000159073	3	7	Up-regulated
Sus_scrofa___ENSSSCG00000039706	3.41153	0.22351	36.8259	3.39932e-07	0.000164337	3	7	Up-regulated
Sus_scrofa___AK4	3.41206	2.66067	46.5303	3.50838e-07	0.000166283	3	7	Up-regulated
Sus_scrofa___ENSSSCG00000043164	3.28915	1.0578	40.5234	4.35895e-07	0.000199033	3	7	Up-regulated
Sus_scrofa___PARP14	4.80535	5.07514	42.6018	4.43539e-07	0.000199033	3	7	Up-regulated
Sus_scrofa___CCL5	5.44925	4.77521	42.9203	4.44638e-07	0.000199033	3	7	Up-regulated
Sus_scrofa___TUFT1	2.85302	2.41155	44.1863	5.34767e-07	0.000235025	3	7	Up-regulated
Sus_scrofa___ENDOV	2.19868	4.83137	43.6393	5.80922e-07	0.000250751	3	7	Up-regulated
Sus_scrofa___FAM180A	2.96055	2.74573	43.2831	6.36973e-07	0.000270121	3	7	Up-regulated
Sus_scrofa___IFIT2	4.71053	5.65235	42.983	6.66837e-07	0.00027791	3	7	Up-regulated
Sus_scrofa___ERO1A	1.51627	6.6642	42.3648	7.38124e-07	0.00030008	3	7	Up-regulated
Sus_scrofa___CCL4	4.90852	2.72088	36.7064	7.64056e-07	0.00030008	3	7	Up-regulated
Sus_scrofa___GBP2	1.61634	5.60943	42.1573	7.68492e-07	0.00030008	3	7	Up-regulated
Sus_scrofa___PMAIP1	3.94074	0.208898	34.0176	7.69692e-07	0.00030008	3	7	Up-regulated
Sus_scrofa___PLOD1	1.76682	4.05101	41.8298	8.23421e-07	0.000314631	3	7	Up-regulated
Sus_scrofa___FAM83B	4.23896	1.63346	38.0204	8.33045e-07	0.000314631	3	7	Up-regulated
Sus_scrofa___KHNYN	2.18899	3.13031	41.7096	8.59062e-07	0.000318633	3	7	Up-regulated
Sus_scrofa___COL1A1	3.43945	0.764538	35.4113	8.70006e-07	0.000318633	3	7	Up-regulated
Sus_scrofa___SIGLEC1	3.83453	1.33972	36.4975	9.63024e-07	0.000347436	3	7	Up-regulated
Sus_scrofa___ENSSSCG00000014997	4.76121	2.81265	38.642	1.13647e-06	0.000403902	3	7	Up-regulated
Sus_scrofa___PFKFB3	3.21112	4.49581	40.1121	1.16838e-06	0.000403902	3	7	Up-regulated
Sus_scrofa___CRACDL	2.24936	4.67243	40.0321	1.16985e-06	0.000403902	3	7	Up-regulated
Sus_scrofa___ENSSSCG00000017754	3.23396	4.14756	40.0961	1.18637e-06	0.000403902	3	7	Up-regulated
Sus_scrofa___RSAD2	6.82069	7.23201	42.4418	1.34868e-06	0.000452783	3	7	Up-regulated
Sus_scrofa___DUSP4	3.64587	2.42191	36.1574	1.39043e-06	0.000460402	3	7	Up-regulated
Sus_scrofa___DDIT4	3.51362	3.61722	39.101	1.43437e-06	0.000465212	3	7	Up-regulated
Sus_scrofa___NMI	4.82067	2.15166	34.023	1.45498e-06	0.000465212	3	7	Up-regulated
Sus_scrofa___CNP	2.8634	0.576544	34.5456	1.46269e-06	0.000465212	3	7	Up-regulated
Sus_scrofa___KIF3C	1.59527	4.54593	38.6492	1.5427e-06	0.000484288	3	7	Up-regulated
Sus_scrofa___IFIT1	4.52204	6.79603	38.6364	1.5733e-06	0.000487563	3	7	Up-regulated
Sus_scrofa___MFSD12	2.03196	2.41946	38.4764	1.6276e-06	0.000493416	3	7	Up-regulated
Sus_scrofa___TRIOBP	1.85724	4.39508	38.3708	1.63302e-06	0.000493416	3	7	Up-regulated
Sus_scrofa___STX11	1.89912	3.82636	38.2168	1.70738e-06	0.000509516	3	7	Up-regulated
Sus_scrofa___ENSSSCG00000013366	1.81071	4.27027	38.0547	1.76472e-06	0.000519201	3	7	Up-regulated
Sus_scrofa___NINJ1	1.71472	3.96891	37.9584	1.78279e-06	0.000519201	3	7	Up-regulated
Sus_scrofa___ERAP2	3.82648	2.45367	37.2091	1.8626e-06	0.000535986	3	7	Up-regulated
Sus_scrofa___FBXO39	2.21314	6.84111	36.8537	2.22663e-06	0.0006332	3	7	Up-regulated
Sus_scrofa___ENSSSCG00000028892	2.14738	3.09134	36.6669	2.36915e-06	0.000665895	3	7	Up-regulated
Sus_scrofa___C1RL	2.27747	1.89114	36.2399	2.55375e-06	0.00070953	3	7	Up-regulated
Sus_scrofa___PSMB9	3.45669	2.85291	34.5566	2.85928e-06	0.000785392	3	7	Up-regulated
Sus_scrofa___HMOX1	3.23311	0.658812	31.4653	2.90597e-06	0.000788984	3	7	Up-regulated
Sus_scrofa___IRF1	2.92435	2.16009	35.5287	2.93764e-06	0.000788984	3	7	Up-regulated
Sus_scrofa___IFIT5	2.82392	5.04124	35.4025	3.03976e-06	0.000804237	3	7	Up-regulated
Sus_scrofa___NUPR1	2.11092	3.29773	35.4284	3.06097e-06	0.000804237	3	7	Up-regulated
Sus_scrofa___TTC21A	1.80743	2.41	35.362	3.11879e-06	0.000810617	3	7	Up-regulated
Sus_scrofa___SLC37A2	2.60994	2.54409	35.3042	3.16241e-06	0.000813211	3	7	Up-regulated
Sus_scrofa___PSME2	1.74607	3.58855	35.1067	3.25857e-06	0.000823849	3	7	Up-regulated
Sus_scrofa___ENSSSCG00000030801	2.16638	4.4789	35.0576	3.27195e-06	0.000823849	3	7	Up-regulated
Sus_scrofa___ZNFX1	2.73934	6.43385	34.9723	3.32418e-06	0.000828372	3	7	Up-regulated
Sus_scrofa___GDAP2	1.54551	6.10764	34.8866	3.38496e-06	0.00083491	3	7	Up-regulated
Sus_scrofa___LURAP1L	3.99712	2.20711	33.2893	3.45493e-06	0.000843562	3	7	Up-regulated
Sus_scrofa___ENSSSCG00000006324	1.82343	3.57276	34.7072	3.56419e-06	0.000861535	3	7	Up-regulated
Sus_scrofa___MED12L	1.72258	4.58009	34.5984	3.60909e-06	0.000863753	3	7	Up-regulated
Sus_scrofa___TYRP1	4.01903	0.452555	29.4531	3.68359e-06	0.000872939	3	7	Up-regulated
Sus_scrofa___B3GNT5	1.96983	2.71054	34.1629	4.06357e-06	0.000953638	3	7	Up-regulated
Sus_scrofa___ANO6	3.84603	6.8153	33.7905	4.33051e-06	0.00100651	3	7	Up-regulated
Sus_scrofa___ENSSSCG00000013880	3.53273	5.05632	33.6976	4.42797e-06	0.00101936	3	7	Up-regulated
Sus_scrofa___SESN2	3.01955	2.83476	33.1403	4.6131e-06	0.00105196	3	7	Up-regulated
Sus_scrofa___LAT2	2.12147	2.78942	33.2762	4.94334e-06	0.00111673	3	7	Up-regulated
Sus_scrofa___UNC93B1	2.79803	1.50229	32.5137	5.01535e-06	0.00112251	3	7	Up-regulated
Sus_scrofa___GK5	1.81132	5.57575	32.829	5.33039e-06	0.00117431	3	7	Up-regulated
Sus_scrofa___MCF2L2	1.64336	4.70306	32.821	5.34396e-06	0.00117431	3	7	Up-regulated
Sus_scrofa___TTF2	1.6746	3.50176	32.6893	5.55398e-06	0.00120606	3	7	Up-regulated
Sus_scrofa___MFSD14B	1.70119	5.34356	32.6183	5.58823e-06	0.00120606	3	7	Up-regulated
Sus_scrofa___ENSSSCG00000045077	5.04105	-0.45553	31.4886	5.70392e-06	0.00122013	3	7	Up-regulated
Sus_scrofa___UBA7	4.18469	0.687014	29.4521	5.88332e-06	0.0012395	3	7	Up-regulated
Sus_scrofa___ENSSSCG00000017146	3.52454	7.50993	32.3446	5.94162e-06	0.0012395	3	7	Up-regulated
Sus_scrofa___GHSR	4.15495	3.7114	32.3626	5.99957e-06	0.0012395	3	7	Up-regulated
Sus_scrofa___MYD88	3.17194	0.540522	28.2508	6.13587e-06	0.00125692	3	7	Up-regulated
Sus_scrofa___P2RY12	2.62721	2.14539	32.1773	6.33506e-06	0.00128682	3	7	Up-regulated
Sus_scrofa___ODC1	1.98159	3.75122	32.048	6.39946e-06	0.00128906	3	7	Up-regulated
Sus_scrofa___ERAP1	1.59366	3.58756	31.9991	6.49634e-06	0.00128927	3	7	Up-regulated
Sus_scrofa___ENSSSCG00000014996	3.685	0.0288957	26.4929	6.52001e-06	0.00128927	3	7	Up-regulated
Sus_scrofa___RNASEL	2.26146	2.52087	31.8874	6.56051e-06	0.00128927	3	7	Up-regulated
Sus_scrofa___LIPA	2.55147	6.70683	31.8332	6.67472e-06	0.00130114	3	7	Up-regulated
Sus_scrofa___FLT1	2.66232	3.37834	31.8102	6.82809e-06	0.00132039	3	7	Up-regulated
Sus_scrofa___TSPAN5	4.38327	4.86708	31.6851	7.06764e-06	0.00135587	3	7	Up-regulated
Sus_scrofa___NDRG1	2.62084	0.0767847	26.4806	7.36602e-06	0.00140198	3	7	Up-regulated
Sus_scrofa___SP110	3.53886	3.74516	31.3313	7.61557e-06	0.00143815	3	7	Up-regulated
Sus_scrofa___PLSCR1	2.30795	5.06535	31.163	7.80011e-06	0.00146158	3	7	Up-regulated
Sus_scrofa___MSN	1.82676	5.12763	30.9534	8.18734e-06	0.00151107	3	7	Up-regulated
Sus_scrofa___MECOM	3.07586	3.00105	31.0208	8.18923e-06	0.00151107	3	7	Up-regulated
Sus_scrofa___C1orf115	2.76716	2.45831	28.7347	8.31417e-06	0.0015225	3	7	Up-regulated
Sus_scrofa___PANX1	3.37493	2.28906	29.7558	8.49091e-06	0.00154318	3	7	Up-regulated
Sus_scrofa___LGALS3	2.84587	-0.105495	25.5836	8.57769e-06	0.00154731	3	7	Up-regulated
Sus_scrofa___TGM1	3.3772	0.0133887	25.5031	8.75558e-06	0.0015677	3	7	Up-regulated
Sus_scrofa___phTBM	2.55472	2.05778	32.4149	9.18739e-06	0.00163292	3	7	Up-regulated
Sus_scrofa___ENSSSCG00000007578	2.5246	1.00308	28.8336	9.66753e-06	0.00170572	3	7	Up-regulated
Sus_scrofa___RNPEP	1.87789	3.00788	30.2589	9.77145e-06	0.00171156	3	7	Up-regulated
Sus_scrofa___ENSSSCG00000039582	1.58086	5.56256	30.1573	9.8521e-06	0.00171327	3	7	Up-regulated
Sus_scrofa___SEMA3D	2.97458	0.99672	27.7613	1.089e-05	0.0018669	3	7	Up-regulated
Sus_scrofa___ENSSSCG00000034049	3.29912	0.85652	26.1744	1.15366e-05	0.00194447	3	7	Up-regulated
Sus_scrofa___DIO1	2.24012	0.952854	28.2845	1.15697e-05	0.00194447	3	7	Up-regulated
Sus_scrofa___SETX	1.81361	6.59243	29.4398	1.16773e-05	0.00194447	3	7	Up-regulated
Sus_scrofa___TRIM38	5.3281	-0.0236909	31.9724	1.1716e-05	0.00194447	3	7	Up-regulated
Sus_scrofa___APOBEC3B	2.34705	3.36844	29.4902	1.17447e-05	0.00194447	3	7	Up-regulated
Sus_scrofa___LIPH	3.27576	0.0795198	25.4854	1.18283e-05	0.001945	3	7	Up-regulated
Sus_scrofa___XKR9	2.7326	3.43254	29.3708	1.20409e-05	0.00196658	3	7	Up-regulated
Sus_scrofa___RAB3B	4.02966	3.0225	29.2163	1.22786e-05	0.00198496	3	7	Up-regulated
Sus_scrofa___H1-3	2.87495	3.30124	29.2962	1.23177e-05	0.00198496	3	7	Up-regulated
Sus_scrofa___ITGB3	3.94825	1.36861	26.5128	1.28446e-05	0.00205615	3	7	Up-regulated
Sus_scrofa___IFNAR1	1.32909	5.00913	28.9097	1.32709e-05	0.00210554	3	7	Up-regulated
Sus_scrofa___B2M	2.01006	6.8538	28.8893	1.33273e-05	0.00210554	3	7	Up-regulated
Sus_scrofa___ENSSSCG00000032552	1.38445	4.42499	28.7292	1.38812e-05	0.00217882	3	7	Up-regulated
Sus_scrofa___KDM3A	1.01777	6.32942	28.6724	1.40453e-05	0.0021809	3	7	Up-regulated
Sus_scrofa___TRIM14	3.0701	1.08124	26.6372	1.41736e-05	0.0021809	3	7	Up-regulated
Sus_scrofa___KLF5	2.26578	2.35276	26.6093	1.42453e-05	0.0021809	3	7	Up-regulated
Sus_scrofa___DHRS13	2.31031	1.40327	27.9953	1.42554e-05	0.0021809	3	7	Up-regulated
Sus_scrofa___TRANK1	2.68338	6.26267	28.5173	1.45888e-05	0.00221787	3	7	Up-regulated
Sus_scrofa___MXD1	1.80656	5.5799	28.474	1.4744e-05	0.00222745	3	7	Up-regulated
Sus_scrofa___TLR3	2.82295	2.15406	28.3879	1.49943e-05	0.0022512	3	7	Up-regulated
Sus_scrofa___HTATIP2	1.37352	3.98728	28.2196	1.57763e-05	0.00235397	3	7	Up-regulated
Sus_scrofa___ADORA2A	2.81845	0.855789	25.7839	1.77734e-05	0.00262204	3	7	Up-regulated
Sus_scrofa___DNAJB9	1.65593	3.82074	27.7329	1.77898e-05	0.00262204	3	7	Up-regulated
Sus_scrofa___ENSSSCG00000001229	4.1889	5.54116	28.0241	1.79441e-05	0.00262876	3	7	Up-regulated
Sus_scrofa___UCHL1	5.09654	0.20144	25.6553	1.82084e-05	0.00265141	3	7	Up-regulated
Sus_scrofa___ARAP2	3.3158	2.55511	27.2623	1.84253e-05	0.00266693	3	7	Up-regulated
Sus_scrofa___MOV10	2.74505	4.35805	27.5433	1.86367e-05	0.00268147	3	7	Up-regulated
Sus_scrofa___PPP2R2C	2.09914	1.65755	27.2027	1.90085e-05	0.00270466	3	7	Up-regulated
Sus_scrofa___EMB	2.20087	2.70056	27.4547	1.90217e-05	0.00270466	3	7	Up-regulated
Sus_scrofa___CMPK2	4.71195	4.75548	28.2842	2.2028e-05	0.00311381	3	7	Up-regulated
Sus_scrofa___BLVRB	2.08848	2.75178	26.7211	2.29182e-05	0.00318356	3	7	Up-regulated
Sus_scrofa___ETS1	2.18701	4.50481	26.665	2.31831e-05	0.00318356	3	7	Up-regulated
Sus_scrofa___PARP8	3.7963	2.30958	26.0662	2.32813e-05	0.00318356	3	7	Up-regulated
Sus_scrofa___MTURN	2.8443	2.45489	26.5376	2.33117e-05	0.00318356	3	7	Up-regulated
Sus_scrofa___SH3BGRL2	3.02726	1.26703	24.9546	2.38619e-05	0.00323296	3	7	Up-regulated
Sus_scrofa___ENSSSCG00000045769	3.26074	3.61228	26.6268	2.39409e-05	0.00323296	3	7	Up-regulated
Sus_scrofa___ENSSSCG00000005738	2.34175	2.12911	26.3162	2.47139e-05	0.00331881	3	7	Up-regulated
Sus_scrofa___ICAM1	4.43852	0.903832	22.531	2.57051e-05	0.00342525	3	7	Up-regulated
Sus_scrofa___ENSSSCG00000033720	2.26516	2.37193	26.186	2.579e-05	0.00342525	3	7	Up-regulated
Sus_scrofa___CASP10	1.92607	5.07945	26.1194	2.65319e-05	0.00349537	3	7	Up-regulated
Sus_scrofa___MCHR2	7.94109	0.352153	28.4184	2.66831e-05	0.00349537	3	7	Up-regulated
Sus_scrofa___TMEM45A	2.46751	1.43894	25.7145	2.67518e-05	0.00349537	3	7	Up-regulated
Sus_scrofa___BHLHE41	3.59225	-0.193918	23.4445	2.71314e-05	0.00352592	3	7	Up-regulated
Sus_scrofa___IFFO2	2.29398	1.78482	25.6422	2.76536e-05	0.00355919	3	7	Up-regulated
Sus_scrofa___HK2	2.16093	5.74587	25.9542	2.76819e-05	0.00355919	3	7	Up-regulated
Sus_scrofa___ENSSSCG00000049813	1.90052	1.91349	25.8163	2.79599e-05	0.00357345	3	7	Up-regulated
Sus_scrofa___CSF1	2.06992	2.41526	25.9652	2.82364e-05	0.00357345	3	7	Up-regulated
Sus_scrofa___SLC16A12	2.99261	3.04964	25.8514	2.89937e-05	0.00364831	3	7	Up-regulated
Sus_scrofa___HFE	4.24927	-0.600539	23.4758	2.91297e-05	0.00364831	3	7	Up-regulated
Sus_scrofa___PFKP	1.47759	3.95596	25.6057	3.03587e-05	0.00376753	3	7	Up-regulated
Sus_scrofa___EMCN	3.32231	1.73832	24.9589	3.03934e-05	0.00376753	3	7	Up-regulated
Sus_scrofa___SLC44A1	1.04573	5.628	25.5028	3.10628e-05	0.00383087	3	7	Up-regulated
Sus_scrofa___MAP1A	2.56245	1.98707	24.4494	3.27343e-05	0.00401652	3	7	Up-regulated
Sus_scrofa___NXPE3	1.96539	3.03545	25.1975	3.41019e-05	0.00414227	3	7	Up-regulated
Sus_scrofa___SEMA4B	1.36074	5.99864	25.0818	3.46479e-05	0.00418754	3	7	Up-regulated
Sus_scrofa___PNPT1	1.43992	5.83225	25.0028	3.53709e-05	0.00425366	3	7	Up-regulated
Sus_scrofa___GM2A	2.38452	2.87707	24.9472	3.64323e-05	0.00435961	3	7	Up-regulated
Sus_scrofa___ENSSSCG00000022246	4.59866	0.0488608	22.1624	3.72682e-05	0.00441592	3	7	Up-regulated
Sus_scrofa___OSMR	1.95017	5.51565	24.7549	3.77667e-05	0.00445316	3	7	Up-regulated
Sus_scrofa___ENSSSCG00000009211	1.66525	3.63612	24.6399	3.92033e-05	0.00458263	3	7	Up-regulated
Sus_scrofa___TBXAS1	2.07372	3.17719	24.5786	4.01793e-05	0.0046693	3	7	Up-regulated
Sus_scrofa___DNASE1L1	1.58487	2.91169	24.5286	4.06652e-05	0.00470316	3	7	Up-regulated
Sus_scrofa___EBI3	2.61967	0.145341	21.6103	4.11023e-05	0.00473107	3	7	Up-regulated
Sus_scrofa___PXK	0.866248	7.0482	24.3879	4.157e-05	0.00473977	3	7	Up-regulated
Sus_scrofa___SPSB1	2.36733	5.04225	24.27	4.29774e-05	0.00487723	3	7	Up-regulated
Sus_scrofa___G6PD	1.96675	2.4982	24.2314	4.40702e-05	0.00497788	3	7	Up-regulated
Sus_scrofa___ENSSSCG00000039071	2.96573	1.26291	22.3446	4.50208e-05	0.0050616	3	7	Up-regulated
Sus_scrofa___GDAP1	2.10506	1.37234	23.3818	4.83805e-05	0.00538919	3	7	Up-regulated
Sus_scrofa___KLF2	3.35857	1.85378	23.195	4.8767e-05	0.00540732	3	7	Up-regulated
Sus_scrofa___ISG15	4.86752	6.79425	23.4839	5.03799e-05	0.00555495	3	7	Up-regulated
Sus_scrofa___H2AC6	3.06567	3.31022	23.7139	5.05581e-05	0.00555495	3	7	Up-regulated
Sus_scrofa___ENSSSCG00000007719	2.29761	1.27766	23.158	5.13203e-05	0.00560555	3	7	Up-regulated
Sus_scrofa___ENSSSCG00000000703	2.73393	0.0140146	20.5662	5.14824e-05	0.00560555	3	7	Up-regulated
Sus_scrofa___ENSSSCG00000035669	2.95413	1.48785	21.5239	5.17219e-05	0.00560637	3	7	Up-regulated
Sus_scrofa___ACOXL	2.33418	3.35255	23.5204	5.33256e-05	0.0057544	3	7	Up-regulated
Sus_scrofa___FAM171B	2.32386	4.28496	23.4551	5.3868e-05	0.0057871	3	7	Up-regulated
Sus_scrofa___ENSSSCG00000003421	1.43958	3.70062	23.2233	5.70661e-05	0.00605472	3	7	Up-regulated
Sus_scrofa___GPRC5B	2.37645	-0.0495166	21.4036	5.71106e-05	0.00605472	3	7	Up-regulated
Sus_scrofa___ISG12(A)	4.61609	6.20939	22.1371	5.77724e-05	0.00608184	3	7	Up-regulated
Sus_scrofa___C3orf14	3.9853	0.172248	20.3409	5.79019e-05	0.00608184	3	7	Up-regulated
Sus_scrofa___ENSSSCG00000021815	1.91097	2.25826	23.0659	5.88003e-05	0.00608184	3	7	Up-regulated
Sus_scrofa___SLC22A18	2.29767	2.24323	23.1341	5.88259e-05	0.00608184	3	7	Up-regulated
Sus_scrofa___PARP9	3.25878	4.34703	23.1357	5.90679e-05	0.00608184	3	7	Up-regulated
Sus_scrofa___TMEM140	2.19556	3.60571	23.1076	5.90766e-05	0.00608184	3	7	Up-regulated
Sus_scrofa___CCDC180	1.74623	6.30385	23.0763	5.91276e-05	0.00608184	3	7	Up-regulated
Sus_scrofa___TEP1	1.01823	5.06982	23.0532	5.95365e-05	0.00609795	3	7	Up-regulated
Sus_scrofa___HELB	1.32937	4.33216	23.0038	6.04124e-05	0.00615731	3	7	Up-regulated
Sus_scrofa___TRIM26	2.21819	4.33996	23.003	6.06255e-05	0.00615731	3	7	Up-regulated
Sus_scrofa___PLXDC2	4.13625	3.23283	22.7369	6.10175e-05	0.00616135	3	7	Up-regulated
Sus_scrofa___SLC16A3	2.50148	1.85957	22.4128	6.11751e-05	0.00616135	3	7	Up-regulated
Sus_scrofa___LDLR	3.39791	1.79575	21.7815	6.2076e-05	0.00622615	3	7	Up-regulated
Sus_scrofa___AGPAT4	1.56855	4.01454	22.8391	6.33836e-05	0.00633102	3	7	Up-regulated
Sus_scrofa___ENSSSCG00000001396	3.43175	0.426752	19.9737	6.40848e-05	0.00637472	3	7	Up-regulated
Sus_scrofa___TKT	0.996224	4.86975	22.7001	6.55812e-05	0.00649684	3	7	Up-regulated
Sus_scrofa___FAM155B	2.79379	1.14296	21.0413	6.61455e-05	0.00652599	3	7	Up-regulated
Sus_scrofa___ACER2	2.38563	2.70161	22.6171	6.79547e-05	0.00667724	3	7	Up-regulated
Sus_scrofa___CHST3	2.96844	-0.225039	19.1706	7.21715e-05	0.00703439	3	7	Up-regulated
Sus_scrofa___WNT6	2.45357	-0.139736	19.6538	7.28646e-05	0.00707342	3	7	Up-regulated
Sus_scrofa___ENSSSCG00000022674	1.87957	2.59499	22.3204	7.37535e-05	0.00713108	3	7	Up-regulated
Sus_scrofa___SERP2	1.12669	4.18318	22.0756	7.80214e-05	0.00751368	3	7	Up-regulated
Sus_scrofa___PGK1	0.882816	4.8178	22.0076	7.94156e-05	0.00759449	3	7	Up-regulated
Sus_scrofa___ZFP36L1	2.89091	3.95288	22.031	7.94889e-05	0.00759449	3	7	Up-regulated
Sus_scrofa___LIG4	1.56529	1.99011	21.8432	8.34253e-05	0.0079392	3	7	Up-regulated
Sus_scrofa___EIF5A2	2.29032	0.841055	20.6113	8.48608e-05	0.00804414	3	7	Up-regulated
Sus_scrofa___LIMK1	1.34406	3.85929	21.7139	8.65874e-05	0.00817574	3	7	Up-regulated
Sus_scrofa___TLL2	1.72267	4.66476	21.6605	8.76105e-05	0.00824016	3	7	Up-regulated
Sus_scrofa___ENSSSCG00000038183	3.63576	-0.445812	19.2988	8.98639e-05	0.0084097	3	7	Up-regulated
Sus_scrofa___PRRG4	2.65681	1.03275	20.0545	9.01089e-05	0.0084097	3	7	Up-regulated
Sus_scrofa___COL16A1	2.63933	2.43303	21.4411	9.35027e-05	0.00865957	3	7	Up-regulated
Sus_scrofa___CHD3	1.53877	3.96345	21.4085	9.42051e-05	0.00869132	3	7	Up-regulated
Sus_scrofa___RILPL2	1.11056	4.31668	21.1646	0.000100797	0.00926412	3	7	Up-regulated
Sus_scrofa___STOX2	2.4446	2.20192	21.1282	0.000101562	0.00929909	3	7	Up-regulated
Sus_scrofa___TSPO	1.88977	3.13135	21.1427	0.000102333	0.00933428	3	7	Up-regulated
Sus_scrofa___EIF4EBP1	1.62857	3.76264	21.002	0.000105947	0.00962764	3	7	Up-regulated
Sus_scrofa___CEP44	1.4823	3.64143	20.9765	0.000106654	0.00965562	3	7	Up-regulated
Sus_scrofa___NETO1	1.70413	1.24624	20.622	0.000109195	0.00984871	3	7	Up-regulated
Sus_scrofa___GPR171	2.7336	0.608732	18.6033	0.000116759	0.0103713	3	7	Up-regulated
Sus_scrofa___TLDC2	2.002	1.56344	20.4025	0.000117128	0.0103713	3	7	Up-regulated
Sus_scrofa___PSMA6	0.835415	6.42382	20.634	0.000117134	0.0103713	3	7	Up-regulated
Sus_scrofa___LGALS3BP	3.68974	2.96132	19.4632	0.00012075	0.0106137	3	7	Up-regulated
Sus_scrofa___SPAG6	1.81686	2.17002	20.4546	0.000122652	0.0106995	3	7	Up-regulated
Sus_scrofa___ENSSSCG00000016548	1.92523	3.55097	20.3588	0.000127496	0.0110065	3	7	Up-regulated
Sus_scrofa___HMCN1	2.28979	6.33145	20.3074	0.000129093	0.0110986	3	7	Up-regulated
Sus_scrofa___P2RY14	2.44357	1.53937	19.8081	0.00012948	0.0110986	3	7	Up-regulated
Sus_scrofa___ZFP36L2	3.2406	3.22948	20.2365	0.000131512	0.0111933	3	7	Up-regulated
Sus_scrofa___STAMBP	0.919458	5.25302	20.1983	0.000132913	0.0112561	3	7	Up-regulated
Sus_scrofa___PRDM8	5.47183	-0.75912	19.6098	0.00013318	0.0112561	3	7	Up-regulated
Sus_scrofa___EHF	2.03589	1.94013	20.1262	0.000136509	0.0114573	3	7	Up-regulated
Sus_scrofa___TMEM150C	2.54559	0.96436	19.2217	0.000137669	0.0115147	3	7	Up-regulated
Sus_scrofa___TNMD	2.32762	-0.105852	17.7583	0.000139358	0.0115437	3	7	Up-regulated
Sus_scrofa___GPRC5A	2.66833	0.653311	18.7896	0.000139377	0.0115437	3	7	Up-regulated
Sus_scrofa___SH3BP4	2.20128	1.71462	19.8588	0.000139858	0.0115437	3	7	Up-regulated
Sus_scrofa___ZC3HAV1	2.65312	6.12924	20.0155	0.000140189	0.0115437	3	7	Up-regulated
Sus_scrofa___ENSSSCG00000036469	2.67069	0.623095	18.3806	0.00014331	0.0117314	3	7	Up-regulated
Sus_scrofa___PARP3	1.25569	4.82898	19.8901	0.000145542	0.0118453	3	7	Up-regulated
Sus_scrofa___C3orf38	1.17074	5.26076	19.8407	0.000147555	0.0119688	3	7	Up-regulated
Sus_scrofa___LIF	5.42973	-0.760132	20.5743	0.000148137	0.0119758	3	7	Up-regulated
Sus_scrofa___VMP1	1.13039	7.57379	19.7752	0.00015036	0.0120339	3	7	Up-regulated
Sus_scrofa___CD86	2.44658	0.538408	18.4087	0.000150828	0.0120339	3	7	Up-regulated
Sus_scrofa___MVP	1.19154	5.6033	19.765	0.000150847	0.0120339	3	7	Up-regulated
Sus_scrofa___IL15	3.64292	3.92732	19.5999	0.000160125	0.0126076	3	7	Up-regulated
Sus_scrofa___AANAT	2.6812	0.100744	17.5411	0.000162737	0.0127303	3	7	Up-regulated
Sus_scrofa___ENSSSCG00000034802	5.32469	-0.0528749	20.6643	0.00016413	0.0127979	3	7	Up-regulated
Sus_scrofa___PALD1	3.02752	0.19332	17.533	0.000166341	0.0128872	3	7	Up-regulated
Sus_scrofa___ENSSSCG00000032422	1.73493	2.78599	19.3937	0.000170366	0.0130121	3	7	Up-regulated
Sus_scrofa___ACBD3	0.845855	5.54601	19.3468	0.00017068	0.0130121	3	7	Up-regulated
Sus_scrofa___DDX60	3.72054	6.6559	19.3544	0.000171183	0.0130121	3	7	Up-regulated
Sus_scrofa___ZBTB22	1.35096	3.22553	19.3046	0.000173991	0.0131841	3	7	Up-regulated
Sus_scrofa___RUNX1	2.19552	0.994307	18.8204	0.000174644	0.0131873	3	7	Up-regulated
Sus_scrofa___SCARB2	1.09795	6.30668	19.2599	0.000175125	0.0131873	3	7	Up-regulated
Sus_scrofa___TREX1	2.53477	1.19591	18.5861	0.000175902	0.0132047	3	7	Up-regulated
Sus_scrofa___LRRC6	1.57645	2.51278	19.2926	0.000176646	0.0132195	3	7	Up-regulated
Sus_scrofa___MPPED1	3.52201	-0.6127	17.9245	0.000178311	0.013262	3	7	Up-regulated
Sus_scrofa___BID	0.939066	4.12747	19.1938	0.000178893	0.0132644	3	7	Up-regulated
Sus_scrofa___SSR3	1.20352	5.65527	19.1227	0.000182456	0.0134872	3	7	Up-regulated
Sus_scrofa___SSUH2	2.13211	0.663693	18.158	0.000186012	0.0136075	3	7	Up-regulated
Sus_scrofa___SDR42E1	1.7683	1.40937	18.7951	0.000186306	0.0136075	3	7	Up-regulated
Sus_scrofa___PAFAH1B3	1.81286	1.41611	18.8774	0.000186334	0.0136075	3	7	Up-regulated
Sus_scrofa___NFKBIZ	3.09648	0.386775	17.165	0.000187013	0.0136159	3	7	Up-regulated
Sus_scrofa___PLPP5	1.62878	1.63109	18.8907	0.000193003	0.0139679	3	7	Up-regulated
Sus_scrofa___ENSSSCG00000011559	0.979177	4.75967	18.9138	0.000194316	0.0140209	3	7	Up-regulated
Sus_scrofa___TNNT1	1.6863	5.11067	18.8917	0.000195585	0.0140288	3	7	Up-regulated
Sus_scrofa___RFTN2	2.12937	1.63688	18.631	0.000198541	0.0141343	3	7	Up-regulated
Sus_scrofa___POLR1G	1.34668	2.29215	18.8701	0.000198812	0.0141343	3	7	Up-regulated
Sus_scrofa___CASP8	1.82897	2.24399	18.8277	0.000200328	0.0142004	3	7	Up-regulated
Sus_scrofa___CPNE8	1.43583	3.07684	18.7834	0.000203054	0.0143139	3	7	Up-regulated
Sus_scrofa___ZMAT3	1.6602	3.90758	18.7777	0.000203114	0.0143139	3	7	Up-regulated
Sus_scrofa___ANKLE2	1.07568	4.3876	18.7371	0.000205018	0.0144061	3	7	Up-regulated
Sus_scrofa___UNC5A	2.91323	-0.0321373	16.7894	0.000206139	0.0144429	3	7	Up-regulated
Sus_scrofa___ARMC12	1.45824	2.95913	18.6179	0.000213259	0.0148986	3	7	Up-regulated
Sus_scrofa___BCL3	1.35826	3.30433	18.6141	0.000214134	0.0149166	3	7	Up-regulated
Sus_scrofa___P4HB	1.22058	3.3775	18.5611	0.000217095	0.0150794	3	7	Up-regulated
Sus_scrofa___ENSSSCG00000034866	3.54137	-0.66081	16.5987	0.000218612	0.0151412	3	7	Up-regulated
Sus_scrofa___ENSSSCG00000024973	1.84243	5.45279	18.4998	0.00022007	0.0151987	3	7	Up-regulated
Sus_scrofa___PRKCZ	1.39225	2.10945	18.4839	0.00022364	0.0154012	3	7	Up-regulated
Sus_scrofa___TRIM56	2.06873	2.76412	18.4548	0.000225606	0.0154925	3	7	Up-regulated
Sus_scrofa___CMAS	1.47752	4.64573	18.3757	0.000228693	0.0155629	3	7	Up-regulated
Sus_scrofa___CSTB	2.38546	2.13125	18.2953	0.000229613	0.0155629	3	7	Up-regulated
Sus_scrofa___CADPS2	2.72169	4.28477	18.3668	0.000230031	0.0155629	3	7	Up-regulated
Sus_scrofa___LYN	1.47218	2.59881	18.3956	0.000230494	0.0155629	3	7	Up-regulated
Sus_scrofa___BSCL2	0.895811	4.06763	18.3221	0.000232657	0.0156651	3	7	Up-regulated
Sus_scrofa___PAQR7	3.10673	-0.614406	16.2937	0.000238871	0.0160388	3	7	Up-regulated
Sus_scrofa___IRF7	2.8764	2.65156	17.59	0.000245607	0.0163731	3	7	Up-regulated
Sus_scrofa___ENSSSCG00000036595	1.27141	4.40295	18.1382	0.000245881	0.0163731	3	7	Up-regulated
Sus_scrofa___CCL2	4.21674	-0.0392561	16.3623	0.000248746	0.0164883	3	7	Up-regulated
Sus_scrofa___ZMYND8	0.684289	7.35073	18.094	0.000248975	0.0164883	3	7	Up-regulated
Sus_scrofa___TRAF3IP2	1.02203	6.95604	18.0803	0.00025003	0.0165129	3	7	Up-regulated
Sus_scrofa___RFC2	1.58575	3.00882	18.0347	0.000255551	0.0168315	3	7	Up-regulated
Sus_scrofa___ARL2BP	1.2452	2.358	18.0076	0.000258887	0.0169629	3	7	Up-regulated
Sus_scrofa___ERICH6	2.50586	2.30154	17.8998	0.000266327	0.0173991	3	7	Up-regulated
Sus_scrofa___MCUB	1.32666	2.71131	17.7562	0.000277663	0.0179937	3	7	Up-regulated
Sus_scrofa___SLC39A11	0.775694	6.1032	17.6667	0.000284014	0.018333	3	7	Up-regulated
Sus_scrofa___BAALC	3.09659	2.93499	17.5416	0.000287039	0.018453	3	7	Up-regulated
Sus_scrofa___TRIQK	2.07404	1.70623	17.5426	0.000288469	0.0184957	3	7	Up-regulated
Sus_scrofa___S100A11	3.24124	1.39327	15.9955	0.000297474	0.0190226	3	7	Up-regulated
Sus_scrofa___LRRC69	1.73315	1.18784	17.1782	0.000301491	0.019178	3	7	Up-regulated
Sus_scrofa___ENSSSCG00000009633	1.84639	4.33577	17.4567	0.000303649	0.0192646	3	7	Up-regulated
Sus_scrofa___ADAM17	1.05053	5.07519	17.3522	0.000313284	0.0196693	3	7	Up-regulated
Sus_scrofa___UFM1	0.786021	5.23922	17.2555	0.000322864	0.0201661	3	7	Up-regulated
Sus_scrofa___NEDD4	1.97276	2.44083	17.2698	0.000326367	0.0202966	3	7	Up-regulated
Sus_scrofa___DAXX	1.61326	2.99627	17.2206	0.000328811	0.0203274	3	7	Up-regulated
Sus_scrofa___TRIM21	2.4504	4.14706	17.147	0.000335382	0.0206675	3	7	Up-regulated
Sus_scrofa___ENSSSCG00000039731	1.77835	3.48561	17.1413	0.000336508	0.0206675	3	7	Up-regulated
Sus_scrofa___TMEM145	1.96173	1.32534	16.7901	0.000337044	0.0206675	3	7	Up-regulated
Sus_scrofa___JAK2	0.979587	7.13284	17.111	0.000337733	0.0206675	3	7	Up-regulated
Sus_scrofa___ENSSSCG00000024009	3.09485	-0.288795	15.6766	0.000347071	0.0211853	3	7	Up-regulated
Sus_scrofa___GRM2	1.79288	1.04608	16.5809	0.000348604	0.0212253	3	7	Up-regulated
Sus_scrofa___PDE12	1.69675	2.33698	17.027	0.000350945	0.0212951	3	7	Up-regulated
Sus_scrofa___ARNTL2	1.55969	5.15215	16.9876	0.000351512	0.0212951	3	7	Up-regulated
Sus_scrofa___RABIF	1.6775	2.49841	16.9926	0.000354695	0.0214342	3	7	Up-regulated
Sus_scrofa___GTPBP2	1.15526	4.81484	16.9173	0.000359126	0.0215992	3	7	Up-regulated
Sus_scrofa___ENSSSCG00000004578	2.21663	5.26822	16.915	0.000359499	0.0215992	3	7	Up-regulated
Sus_scrofa___TECTB	2.38419	0.116307	15.3649	0.000360106	0.0215992	3	7	Up-regulated
Sus_scrofa___DTX3L	3.13122	4.00692	16.9059	0.000364194	0.0217903	3	7	Up-regulated
Sus_scrofa___TOR3A	1.22181	3.53747	16.8547	0.000367428	0.021919	3	7	Up-regulated
Sus_scrofa___ENSSSCG00000008898	2.5969	1.38844	16.095	0.000368196	0.021919	3	7	Up-regulated
Sus_scrofa___RBFOX3	1.7428	1.55482	16.7176	0.000369065	0.021919	3	7	Up-regulated
Sus_scrofa___ZBTB14	1.82497	0.82463	16.2051	0.0003709	0.0219661	3	7	Up-regulated
Sus_scrofa___NFKBIA	1.61245	3.95078	16.8151	0.000371675	0.0219661	3	7	Up-regulated
Sus_scrofa___ENSSSCG00000048793	2.21142	0.0211598	15.3555	0.000375237	0.0221225	3	7	Up-regulated
Sus_scrofa___GPNMB	1.38876	4.40519	16.7102	0.000383702	0.0225665	3	7	Up-regulated
Sus_scrofa___REC8	2.32415	1.0097	15.5759	0.000385558	0.0226207	3	7	Up-regulated
Sus_scrofa___PKM	0.763942	6.70258	16.6757	0.000387517	0.0226806	3	7	Up-regulated
Sus_scrofa___CAVIN3	3.40389	-0.65854	16.057	0.00039279	0.0229319	3	7	Up-regulated
Sus_scrofa___NFKBIE	2.6075	0.168899	15.013	0.000393727	0.0229319	3	7	Up-regulated
Sus_scrofa___TNFRSF1B	3.20176	-0.562677	16.0759	0.000394657	0.0229319	3	7	Up-regulated
Sus_scrofa___LETM2	1.14696	3.32485	16.6189	0.00039629	0.0229715	3	7	Up-regulated
Sus_scrofa___ETV3	1.50341	3.77464	16.5337	0.000406738	0.0235208	3	7	Up-regulated
Sus_scrofa___LRRC55	2.63274	0.418891	15.313	0.000411562	0.0237429	3	7	Up-regulated
Sus_scrofa___SRPX2	2.17915	-0.0826415	14.8784	0.000421425	0.0242503	3	7	Up-regulated
Sus_scrofa___NMU	3.07864	-0.271416	14.6509	0.000429511	0.0246023	3	7	Up-regulated
Sus_scrofa___RANBP17	1.18962	5.75995	16.3385	0.000431597	0.0246633	3	7	Up-regulated
Sus_scrofa___KCNC3	1.85477	0.267308	15.2912	0.00043411	0.024719	3	7	Up-regulated
Sus_scrofa___FUT11	1.27726	2.69348	16.261	0.000446849	0.0251027	3	7	Up-regulated
Sus_scrofa___EGFR	2.38347	0.90077	15.4067	0.000450695	0.025218	3	7	Up-regulated
Sus_scrofa___ENSSSCG00000016527	1.62386	3.75185	16.099	0.000467186	0.0259688	3	7	Up-regulated
Sus_scrofa___KRBA1	1.58516	2.61484	16.1221	0.000467406	0.0259688	3	7	Up-regulated
Sus_scrofa___ENSSSCG00000001394	4.07293	-0.541941	15.0518	0.000471485	0.0259688	3	7	Up-regulated
Sus_scrofa___ZNF484	1.51339	2.77007	16.09	0.000472	0.0259688	3	7	Up-regulated
Sus_scrofa___ENSSSCG00000001456	2.21783	0.513674	15.3663	0.000481961	0.0264172	3	7	Up-regulated
Sus_scrofa___DHDH	1.16304	3.83207	15.9799	0.000485702	0.026562	3	7	Up-regulated
Sus_scrofa___ENSSSCG00000004404	1.91745	1.01398	15.496	0.000490398	0.0267382	3	7	Up-regulated
Sus_scrofa___ENSSSCG00000014565	1.42844	4.54336	15.9392	0.000491137	0.0267382	3	7	Up-regulated
Sus_scrofa___MEIS3	3.26064	-0.429296	14.7288	0.000494512	0.0268115	3	7	Up-regulated
Sus_scrofa___TMEM51	1.73211	0.82279	14.9789	0.00049581	0.0268115	3	7	Up-regulated
Sus_scrofa___EFCAB3	1.59135	1.65028	15.8805	0.000499099	0.0269291	3	7	Up-regulated
Sus_scrofa___ENSSSCG00000010448	1.08938	4.92504	15.8349	0.000507903	0.0273392	3	7	Up-regulated
Sus_scrofa___SH3PXD2B	1.42117	7.08455	15.8134	0.000511269	0.0274022	3	7	Up-regulated
Sus_scrofa___MROH5	1.72932	3.22841	15.7594	0.000523191	0.0279174	3	7	Up-regulated
Sus_scrofa___ITGA3	1.64658	2.94942	15.7255	0.000529795	0.0281541	3	7	Up-regulated
Sus_scrofa___ENSSSCG00000043413	4.92246	-0.654353	17.1469	0.000534348	0.0283251	3	7	Up-regulated
Sus_scrofa___CNN3	2.83966	2.43381	15.5453	0.000536831	0.0283945	3	7	Up-regulated
Sus_scrofa___DDX11	1.39324	4.09469	15.6563	0.000538896	0.0284375	3	7	Up-regulated
Sus_scrofa___ENSSSCG00000017507	1.93897	0.485416	14.8961	0.000540124	0.0284375	3	7	Up-regulated
Sus_scrofa___PNOC	1.63092	1.51114	15.634	0.000541174	0.0284375	3	7	Up-regulated
Sus_scrofa___ENSSSCG00000044997	2.66153	0.84896	14.903	0.000543503	0.0284681	3	7	Up-regulated
Sus_scrofa___NEGR1	1.47642	3.68672	15.6318	0.000544112	0.0284681	3	7	Up-regulated
Sus_scrofa___MTPN	1.12641	7.36496	15.5854	0.00055073	0.0286285	3	7	Up-regulated
Sus_scrofa___ENSSSCG00000006350	2.22613	3.24378	15.5869	0.00055659	0.0288092	3	7	Up-regulated
Sus_scrofa___ENSSSCG00000014280	1.34688	7.96784	15.5047	0.000565472	0.0292064	3	7	Up-regulated
Sus_scrofa___HPCAL1	1.03519	4.69556	15.4975	0.000567237	0.0292351	3	7	Up-regulated
Sus_scrofa___CD9	2.34155	2.06012	15.4243	0.000572217	0.0292732	3	7	Up-regulated
Sus_scrofa___APAF1	1.09702	5.06169	15.4689	0.000572345	0.0292732	3	7	Up-regulated
Sus_scrofa___RAB27B	2.70984	2.94311	15.4883	0.000572821	0.0292732	3	7	Up-regulated
Sus_scrofa___RASSF1	1.56661	4.32303	15.4473	0.000576892	0.0293587	3	7	Up-regulated
Sus_scrofa___GTF2B	0.75445	5.44039	15.4441	0.000576932	0.0293587	3	7	Up-regulated
Sus_scrofa___LGALS1	3.0532	1.73	14.3574	0.000578138	0.0293587	3	7	Up-regulated
Sus_scrofa___ASIC4	1.60809	0.736858	14.9275	0.000585604	0.0295516	3	7	Up-regulated
Sus_scrofa___ENSSSCG00000010546	1.52811	1.02713	15.1636	0.000591713	0.029697	3	7	Up-regulated
Sus_scrofa___SHISA5	2.15951	3.04853	15.3996	0.000591744	0.029697	3	7	Up-regulated
Sus_scrofa___CPA1	1.56039	1.8347	15.3462	0.000596927	0.0298736	3	7	Up-regulated
Sus_scrofa___ENSSSCG00000001341	2.70431	4.44118	15.2928	0.000607454	0.0301835	3	7	Up-regulated
Sus_scrofa___ENSSSCG00000012006	1.93529	5.34477	15.2861	0.000608116	0.0301835	3	7	Up-regulated
Sus_scrofa___PML	2.36867	6.191	15.2332	0.000618441	0.0305705	3	7	Up-regulated
Sus_scrofa___ZNF274	0.767681	5.92311	15.1998	0.00062524	0.0308435	3	7	Up-regulated
Sus_scrofa___AKR1D1	1.24562	4.70998	15.1907	0.000627528	0.0308933	3	7	Up-regulated
Sus_scrofa___VAMP5	1.48275	2.52032	15.172	0.000636013	0.031184	3	7	Up-regulated
Sus_scrofa___XPO6	0.765586	6.51128	15.1238	0.00064116	0.0312216	3	7	Up-regulated
Sus_scrofa___IRF2	1.16395	6.96148	15.1167	0.000642653	0.0312216	3	7	Up-regulated
Sus_scrofa___AKAP7	1.42359	6.53543	15.1154	0.000642953	0.0312216	3	7	Up-regulated
Sus_scrofa___IGFBP2	2.67032	3.34762	14.819	0.00064307	0.0312216	3	7	Up-regulated
Sus_scrofa___DUSP2	2.80684	0.18054	13.7473	0.000643238	0.0312216	3	7	Up-regulated
Sus_scrofa___CELSR3	4.5958	-0.813525	15.1342	0.000650362	0.0315041	3	7	Up-regulated
Sus_scrofa___C4A	2.11575	1.14976	14.8091	0.000659212	0.0318053	3	7	Up-regulated
Sus_scrofa___PIK3IP1	1.33794	2.57599	15.0361	0.000665971	0.0320674	3	7	Up-regulated
Sus_scrofa___MAP1B	1.09099	6.90413	14.9893	0.000670414	0.0322172	3	7	Up-regulated
Sus_scrofa___TAGLN	2.89548	-0.436728	13.9253	0.000678663	0.0324844	3	7	Up-regulated
Sus_scrofa___ENSSSCG00000036274	2.38254	0.704579	14.1993	0.000680675	0.0325164	3	7	Up-regulated
Sus_scrofa___ENSSSCG00000047841	2.67849	-0.404193	13.4556	0.000685579	0.032686	3	7	Up-regulated
Sus_scrofa___CBR3	3.14929	0.697981	13.8458	0.000687234	0.0327004	3	7	Up-regulated
Sus_scrofa___GFOD2	1.03062	4.72245	14.8932	0.000692622	0.0328921	3	7	Up-regulated
Sus_scrofa___ENSSSCG00000010401	0.883597	4.80587	14.876	0.000696515	0.0330121	3	7	Up-regulated
Sus_scrofa___ENSSSCG00000005453	1.61459	3.73098	14.8832	0.000697881	0.0330121	3	7	Up-regulated
Sus_scrofa___PRICKLE3	1.12676	3.31048	14.8597	0.00070279	0.0331362	3	7	Up-regulated
Sus_scrofa___TNN	2.15276	-0.162094	13.4698	0.00070888	0.0333367	3	7	Up-regulated
Sus_scrofa___CLHC1	1.30861	2.23308	14.8375	0.000710927	0.033368	3	7	Up-regulated
Sus_scrofa___EDEM1	1.06133	3.185	14.7755	0.00072326	0.0337118	3	7	Up-regulated
Sus_scrofa___MMP25	2.56402	3.06718	14.7379	0.000723952	0.0337118	3	7	Up-regulated
Sus_scrofa___NARF	0.991147	4.92269	14.7548	0.000725225	0.0337118	3	7	Up-regulated
Sus_scrofa___ARHGEF39	1.73397	2.87774	14.6907	0.000744707	0.0344912	3	7	Up-regulated
Sus_scrofa___FAM76A	0.687253	6.41923	14.6647	0.000747217	0.0345349	3	7	Up-regulated
Sus_scrofa___SAP30L	1.17053	4.16355	14.6565	0.000750393	0.0345705	3	7	Up-regulated
Sus_scrofa___MLLT11	1.38633	4.44455	14.6497	0.000751964	0.0345705	3	7	Up-regulated
Sus_scrofa___MYO1D	1.76678	4.09678	14.6484	0.000752279	0.0345705	3	7	Up-regulated
Sus_scrofa___YBX2	2.07233	1.52996	14.4009	0.000759302	0.0347062	3	7	Up-regulated
Sus_scrofa___ZNF395	0.932577	6.21663	14.6162	0.000759513	0.0347062	3	7	Up-regulated
Sus_scrofa___ENSSSCG00000012950	2.8113	-0.0477209	13.1832	0.000759539	0.0347062	3	7	Up-regulated
Sus_scrofa___PSMB10	1.83925	1.99671	14.5431	0.000769774	0.0349333	3	7	Up-regulated
Sus_scrofa___PLEKHS1	2.24436	1.78791	14.5437	0.000770289	0.0349333	3	7	Up-regulated
Sus_scrofa___CGNL1	3.07678	2.80968	14.4419	0.000784229	0.0354325	3	7	Up-regulated
Sus_scrofa___ENSSSCG00000012566	0.731133	5.21438	14.5128	0.000786559	0.0354715	3	7	Up-regulated
Sus_scrofa___PIEZO1	2.65498	0.449181	13.5166	0.000799131	0.0359045	3	7	Up-regulated
Sus_scrofa___ENSSSCG00000038594	0.986923	5.76633	14.4498	0.000803346	0.0360269	3	7	Up-regulated
Sus_scrofa___PLAT	3.70549	1.46338	13.2661	0.0008222	0.0366764	3	7	Up-regulated
Sus_scrofa___SLC2A6	2.0076	0.162862	13.4217	0.0008332	0.0368192	3	7	Up-regulated
Sus_scrofa___HAP1	2.06432	0.252278	13.3302	0.000839639	0.036973	3	7	Up-regulated
Sus_scrofa___GRM3	1.79615	2.05518	14.3508	0.00083974	0.036973	3	7	Up-regulated
Sus_scrofa___HSPA5	1.53408	4.30142	14.2692	0.000854753	0.0375408	3	7	Up-regulated
Sus_scrofa___ENSSSCG00000051689	2.37107	0.75473	13.5275	0.000856852	0.0375408	3	7	Up-regulated
Sus_scrofa___CBARP	1.9454	1.46076	14.2064	0.000857294	0.0375408	3	7	Up-regulated
Sus_scrofa___ENSSSCG00000047274	1.76895	1.62208	14.2084	0.000859612	0.0375742	3	7	Up-regulated
Sus_scrofa___S100A6	3.63665	0.577087	13.1714	0.000863041	0.0376354	3	7	Up-regulated
Sus_scrofa___SBNO2	1.1603	4.84528	14.2222	0.000868011	0.0377366	3	7	Up-regulated
Sus_scrofa___VAX2	2.40729	-0.398744	12.9548	0.000894196	0.0387355	3	7	Up-regulated
Sus_scrofa___ELF4	1.87561	1.70011	13.9969	0.000897397	0.0387355	3	7	Up-regulated
Sus_scrofa___CENPJ	1.03491	2.82028	14.1151	0.000905104	0.0389292	3	7	Up-regulated
Sus_scrofa___MIF	2.17103	1.7433	13.9987	0.00091074	0.0390327	3	7	Up-regulated
Sus_scrofa___SH3D19	1.64373	5.19451	13.9789	0.00094352	0.0401806	3	7	Up-regulated
Sus_scrofa___RNF181	1.59765	1.94535	13.9711	0.000944174	0.0401806	3	7	Up-regulated
Sus_scrofa___GRIK3	1.58626	1.21214	13.8228	0.000948231	0.0402823	3	7	Up-regulated
Sus_scrofa___RHBDD1	1.06063	5.49226	13.9154	0.000963623	0.0407215	3	7	Up-regulated
Sus_scrofa___KCTD8	1.49578	2.71938	13.9311	0.000965782	0.0407415	3	7	Up-regulated
Sus_scrofa___STAT1	2.25647	7.86284	13.898	0.000969271	0.0408174	3	7	Up-regulated
Sus_scrofa___ENSSSCG00000021579	2.09318	-0.322861	12.6191	0.000980353	0.0411408	3	7	Up-regulated
Sus_scrofa___DEPDC1B	1.1188	3.02394	13.7774	0.00101502	0.0423017	3	7	Up-regulated
Sus_scrofa___TRAIP	1.28085	3.16746	13.7686	0.00101849	0.0423265	3	7	Up-regulated
Sus_scrofa___ENSSSCG00000048994	1.58537	2.59228	13.7616	0.00102433	0.04247	3	7	Up-regulated
Sus_scrofa___ENSSSCG00000050501	1.81374	0.312849	12.9476	0.00104184	0.0428141	3	7	Up-regulated
Sus_scrofa___NEMP2	1.14819	4.94455	13.6853	0.00104325	0.0428141	3	7	Up-regulated
Sus_scrofa___PDCD1LG2	1.55193	1.57338	13.6569	0.00104592	0.0428508	3	7	Up-regulated
Sus_scrofa___ENSSSCG00000002941	2.3303	0.481215	12.6906	0.00105474	0.043028	3	7	Up-regulated
Sus_scrofa___TMTC1	1.88847	1.81781	13.4417	0.00107269	0.043555	3	7	Up-regulated
Sus_scrofa___LAP3	0.919569	5.60542	13.6007	0.00107392	0.043555	3	7	Up-regulated
Sus_scrofa___ENSSSCG00000017971	1.43592	2.33494	13.6115	0.00107815	0.0436532	3	7	Up-regulated
Sus_scrofa___KCNAB1	1.38218	4.77426	13.5783	0.00108258	0.0437595	3	7	Up-regulated
Sus_scrofa___ENSSSCG00000007944	1.45867	0.8988	13.2829	0.0010871	0.0438686	3	7	Up-regulated
Sus_scrofa___VCAM1	2.86487	0.0946059	12.3557	0.00109228	0.0440042	3	7	Up-regulated
Sus_scrofa___NIPAL2	2.14054	3.86755	13.5532	0.0010962	0.0440886	3	7	Up-regulated
Sus_scrofa___PLOD2	1.74013	5.3204	13.5373	0.0010981	0.0440919	3	7	Up-regulated
Sus_scrofa___ENSSSCG00000042730	2.69614	-0.0252322	12.4387	0.00110233	0.0441702	3	7	Up-regulated
Sus_scrofa___CASK	0.926736	6.14956	13.454	0.00112995	0.0450712	3	7	Up-regulated
Sus_scrofa___CDC42BPG	2.85483	-0.635911	12.2156	0.0011374	0.0452571	3	7	Up-regulated
Sus_scrofa___ENSSSCG00000022794	1.91319	1.32974	13.1692	0.00114197	0.0453262	3	7	Up-regulated
Sus_scrofa___THNSL1	1.05438	3.14063	13.4318	0.00114392	0.0453293	3	7	Up-regulated
Sus_scrofa___SGK1	2.44493	1.80672	13.1001	0.0011489	0.0454522	3	7	Up-regulated
Sus_scrofa___ECM1	3.56519	-0.612031	12.9851	0.00115257	0.0454874	3	7	Up-regulated
Sus_scrofa___VSIG10	1.10462	3.44955	13.3969	0.00115544	0.0454874	3	7	Up-regulated
Sus_scrofa___MFRP	2.02066	1.07458	12.8144	0.00115788	0.0455095	3	7	Up-regulated
Sus_scrofa___CGAS	4.05321	-0.629587	13.7002	0.00117202	0.0459902	3	7	Up-regulated
Sus_scrofa___WDR54	3.08195	-0.27781	12.383	0.00118003	0.0462297	3	7	Up-regulated
Sus_scrofa___PGM2	0.973643	3.75757	13.3044	0.00119272	0.0464559	3	7	Up-regulated
Sus_scrofa___NUAK2	1.68298	2.4207	13.3257	0.00119349	0.0464559	3	7	Up-regulated
Sus_scrofa___ACTG2	1.92664	0.778598	12.7584	0.00119834	0.0465695	3	7	Up-regulated
Sus_scrofa___FBXL20	0.699786	7.68696	13.2797	0.00120066	0.0465847	3	7	Up-regulated
Sus_scrofa___APH1A	1.00904	3.38089	13.2667	0.00120949	0.0468521	3	7	Up-regulated
Sus_scrofa___CBLC	1.89828	0.807407	12.7932	0.00121674	0.0468776	3	7	Up-regulated
Sus_scrofa___PHLDA2	2.44659	3.44199	13.2664	0.00121692	0.0468776	3	7	Up-regulated
Sus_scrofa___XBP1	1.07542	3.64507	13.2396	0.00121981	0.0468776	3	7	Up-regulated
Sus_scrofa___TMEM108	1.0117	3.74025	13.2288	0.0012244	0.0468776	3	7	Up-regulated
Sus_scrofa___CHMP5	0.969529	3.34069	13.2306	0.00122566	0.0468776	3	7	Up-regulated
Sus_scrofa___IL23A	2.01852	-0.220971	12.1015	0.0012446	0.047377	3	7	Up-regulated
Sus_scrofa___ENSSSCG00000027741	0.776605	4.35065	13.1556	0.00125473	0.0476878	3	7	Up-regulated
Sus_scrofa___TICAM1	3.79109	-0.744158	12.9009	0.00126194	0.0478864	3	7	Up-regulated
Sus_scrofa___TAGLN3	2.87996	-0.522329	11.9605	0.00128183	0.0484891	3	7	Up-regulated
Sus_scrofa___SCAMP4	1.2185	2.57346	13.104	0.00128611	0.0485748	3	7	Up-regulated
Sus_scrofa___DPYS	1.62332	0.655725	12.7021	0.00129877	0.0489	3	7	Up-regulated
Sus_scrofa___RABEP2	1.52091	1.62815	12.9746	0.00130689	0.0491291	3	7	Up-regulated
Sus_scrofa___RARA	1.37364	4.025	13.032	0.00131148	0.0492252	3	7	Up-regulated
Sus_scrofa___S100A2	2.51191	0.0797998	12.0369	0.00133355	0.049668	3	7	Up-regulated
Sus_scrofa___OCEL1	1.60439	1.22714	12.7657	0.00133932	0.0497316	3	7	Up-regulated
Sus_scrofa___RND1	2.51553	-0.110574	11.9167	0.00133937	0.0497316	3	7	Up-regulated
Sus_scrofa___GRINA	2.23081	0.269402	12.021	0.00134837	0.0499153	3	7	Up-regulated
Sus_scrofa___TRDMT1	-0.952365	5.67999	32.3196	5.97651e-06	0.0012395	3	7	Down-regulated
Sus_scrofa___KCNJ3	-1.35321	9.82378	30.0024	1.0213e-05	0.00176335	3	7	Down-regulated
Sus_scrofa___RNF180	-1.32392	8.81795	26.803	2.22876e-05	0.00313218	3	7	Down-regulated
Sus_scrofa___PDE3B	-1.22745	9.86961	26.7681	2.24845e-05	0.00314159	3	7	Down-regulated
Sus_scrofa___CHN1	-1.45625	8.2639	25.8848	2.81441e-05	0.00357345	3	7	Down-regulated
Sus_scrofa___FIGN	-1.10662	7.05641	25.1842	3.37298e-05	0.00411777	3	7	Down-regulated
Sus_scrofa___CYCS	-1.24833	5.12059	24.8631	3.67015e-05	0.00437019	3	7	Down-regulated
Papio_anubis_ENSPANG00000017547	-2.57787	1.50862	23.4471	3.92439e-05	0.00458263	3	7	Down-regulated
Sus_scrofa___PDE4D	-1.33531	13.3305	24.3951	4.14895e-05	0.00473977	3	7	Down-regulated
Sus_scrofa___HOMER2	-1.58202	8.81921	24.0668	4.52687e-05	0.0050659	3	7	Down-regulated
Sus_scrofa___KIF26B	-2.36751	10.2456	23.2316	5.667e-05	0.00605472	3	7	Down-regulated
Sus_scrofa___CXADR	-1.16645	6.31589	22.4683	6.98451e-05	0.00683521	3	7	Down-regulated
Sus_scrofa___SEMA3C	-1.59523	9.22613	21.4598	9.25518e-05	0.00860447	3	7	Down-regulated
Sus_scrofa___ENSSSCG00000045606	-5.20798	-0.150044	19.8276	0.000109652	0.00984972	3	7	Down-regulated
Sus_scrofa___RNF11	-0.947273	6.74672	20.852	0.000110021	0.00984972	3	7	Down-regulated
Sus_scrofa___METAP1D	-0.834569	6.28928	20.5603	0.000119648	0.0105552	3	7	Down-regulated
Sus_scrofa___CPNE3	-1.31495	9.30208	20.4784	0.000122499	0.0106995	3	7	Down-regulated
Sus_scrofa___RGS7BP	-1.21615	6.90469	20.4629	0.000123054	0.0106995	3	7	Down-regulated
Sus_scrofa___COQ8A	-1.25131	7.46122	20.3659	0.000126556	0.0109646	3	7	Down-regulated
Sus_scrofa___DAPL1	-2.27063	4.76016	20.2526	0.000130187	0.0111197	3	7	Down-regulated
Sus_scrofa___ROS1	-3.1396	3.71734	20.0904	0.000135794	0.011437	3	7	Down-regulated
Sus_scrofa___GFM1	-1.25866	8.25725	20.009	0.000140404	0.0115437	3	7	Down-regulated
Sus_scrofa___BARD1	-1.50069	6.21495	19.9309	0.000143658	0.0117314	3	7	Down-regulated
Papio_anubis_QKI	-3.48405	1.74136	18.9431	0.000150177	0.0120339	3	7	Down-regulated
Sus_scrofa___CDH2	-1.20199	11.6792	19.7482	0.000151555	0.0120506	3	7	Down-regulated
Papio_anubis_ACTC1	-4.30967	0.0221763	18.0766	0.000156354	0.0123618	3	7	Down-regulated
Sus_scrofa___HIPK3	-1.08631	8.79017	19.6394	0.000156491	0.0123618	3	7	Down-regulated
Sus_scrofa___USP28	-1.44974	8.49137	19.5342	0.000161428	0.012669	3	7	Down-regulated
Sus_scrofa___EPC2	-0.829804	7.04056	19.4432	0.000165833	0.0128872	3	7	Down-regulated
Sus_scrofa___SLC8A1	-1.20083	13.5125	19.3979	0.000168074	0.0129798	3	7	Down-regulated
Sus_scrofa___JADE1	-1.22762	8.16508	19.374	0.000169271	0.0129953	3	7	Down-regulated
Sus_scrofa___SOX6	-1.01394	10.3127	19.3724	0.00016935	0.0129953	3	7	Down-regulated
Sus_scrofa___HACD1	-1.33766	7.49109	19.2193	0.000177235	0.0132226	3	7	Down-regulated
Sus_scrofa___MYOM1	-1.41122	10.0791	19.0907	0.000184168	0.0135723	3	7	Down-regulated
Sus_scrofa___ENSSSCG00000041764	-1.06846	7.88573	18.9972	0.000189394	0.0137478	3	7	Down-regulated
Sus_scrofa___NDUFA13	-1.00303	4.69842	18.8975	0.000195265	0.0140288	3	7	Down-regulated
Sus_scrofa___PAXBP1	-0.949019	7.44385	18.859	0.00019741	0.0141178	3	7	Down-regulated
Sus_scrofa___PTPN4	-1.17053	9.19109	18.3754	0.00022848	0.0155629	3	7	Down-regulated
Sus_scrofa___ZNF236	-0.880774	5.86026	18.3538	0.000230019	0.0155629	3	7	Down-regulated
Sus_scrofa___MYOZ2	-1.2829	11.6964	18.1709	0.000243181	0.016283	3	7	Down-regulated
Sus_scrofa___AGL	-0.931817	8.1778	17.9659	0.000258949	0.0169629	3	7	Down-regulated
Sus_scrofa___EPC1	-0.77691	8.67061	17.8271	0.000270253	0.017608	3	7	Down-regulated
Sus_scrofa___ENSSSCG00000038605	-2.37837	3.30802	17.3677	0.000276535	0.0179688	3	7	Down-regulated
Sus_scrofa___KLHL31	-1.65781	7.38589	17.6619	0.000284415	0.018333	3	7	Down-regulated
Sus_scrofa___PCDH7	-0.911671	12.3195	17.4889	0.000300099	0.0191398	3	7	Down-regulated
Sus_scrofa___RYR2	-1.1322	13.6892	17.3913	0.000309359	0.0195755	3	7	Down-regulated
Sus_scrofa___ENSSSCG00000004082	-1.1414	8.50592	17.3621	0.000312193	0.0196693	3	7	Down-regulated
Sus_scrofa___DLC1	-1.13606	11.3491	17.3556	0.00031282	0.0196693	3	7	Down-regulated
Sus_scrofa___MRTFB	-0.940175	8.61002	17.3111	0.000317204	0.0198639	3	7	Down-regulated
Sus_scrofa___PLEKHH1	-0.829599	5.05009	17.2116	0.000327364	0.0202966	3	7	Down-regulated
Sus_scrofa___FBXO40	-1.13917	7.70652	17.2093	0.000327473	0.0202966	3	7	Down-regulated
Sus_scrofa___KIF18A	-1.65053	3.15184	16.4213	0.000422364	0.0242503	3	7	Down-regulated
Sus_scrofa___PPP1R3A	-1.79442	7.14936	16.3133	0.000435041	0.024719	3	7	Down-regulated
Sus_scrofa___DLD	-0.731646	6.0898	16.3092	0.000435641	0.024719	3	7	Down-regulated
Sus_scrofa___ADAMTS6	-1.7426	8.43411	16.2943	0.000437701	0.0247778	3	7	Down-regulated
Sus_scrofa___SIPA1L2	-1.12758	8.75653	16.2637	0.000442018	0.0249637	3	7	Down-regulated
Sus_scrofa___ASB11	-2.33724	4.7446	16.2417	0.000446257	0.0251027	3	7	Down-regulated
Sus_scrofa___CDH8	-1.7342	6.82467	16.2249	0.000447595	0.0251027	3	7	Down-regulated
Sus_scrofa___PDE7A	-1.8781	9.83661	16.0998	0.000465957	0.0259688	3	7	Down-regulated
Sus_scrofa___IRX3	-1.25942	4.28105	16.069	0.000471149	0.0259688	3	7	Down-regulated
Sus_scrofa___GALNT7	-0.841635	7.25882	16.0639	0.000471407	0.0259688	3	7	Down-regulated
Sus_scrofa___EPHA7	-1.4488	7.05809	16.0554	0.000472707	0.0259688	3	7	Down-regulated
Sus_scrofa___SPATS2L	-0.87483	8.07179	15.9108	0.000495345	0.0268115	3	7	Down-regulated
Sus_scrofa___TNNC1	-1.35039	7.30175	15.8273	0.000508962	0.0273392	3	7	Down-regulated
Sus_scrofa___UQCRC2	-0.618283	7.24709	15.7639	0.000519563	0.0277851	3	7	Down-regulated
Sus_scrofa___SMPD4	-0.914876	4.48358	15.7058	0.000529956	0.0281541	3	7	Down-regulated
Sus_scrofa___TANC1	-1.14546	10.3765	15.6079	0.000546678	0.0285225	3	7	Down-regulated
Papio_anubis_CLINT1	-3.07281	0.836723	14.9095	0.000547512	0.0285225	3	7	Down-regulated
Sus_scrofa___PRKAA2	-0.917435	9.00416	15.5718	0.000553173	0.0286938	3	7	Down-regulated
Sus_scrofa___SLMAP	-1.15214	10.2389	15.4765	0.000570719	0.0292732	3	7	Down-regulated
Sus_scrofa___ITGB1BP2	-1.52526	6.74957	15.4105	0.000583246	0.0295516	3	7	Down-regulated
Sus_scrofa___TMEM182	-1.05176	9.01673	15.4025	0.000584759	0.0295516	3	7	Down-regulated
Sus_scrofa___MITF	-0.890907	10.3743	15.3643	0.000592171	0.029697	3	7	Down-regulated
Sus_scrofa___TMEM168	-0.650875	6.45929	15.3236	0.000600174	0.029974	3	7	Down-regulated
Sus_scrofa___RAB3GAP1	-0.772389	7.30563	15.2844	0.000607981	0.0301835	3	7	Down-regulated
Sus_scrofa___PMS1	-0.938222	7.94275	15.2699	0.000610888	0.030259	3	7	Down-regulated
Sus_scrofa___LGI1	-4.87105	-0.345798	14.33	0.000633775	0.0311374	3	7	Down-regulated
Sus_scrofa___LRRC24	-1.60098	2.71	15.0758	0.00065503	0.0316668	3	7	Down-regulated
Sus_scrofa___MRPS28	-0.857365	5.76729	14.9755	0.000673572	0.0323047	3	7	Down-regulated
Sus_scrofa___NDUFB2	-0.827669	5.36761	14.8463	0.000703246	0.0331362	3	7	Down-regulated
Sus_scrofa___SYNM	-1.29362	6.63315	14.7724	0.000720727	0.0337118	3	7	Down-regulated
Sus_scrofa___SVIL	-1.0931	10.4999	14.7627	0.000723045	0.0337118	3	7	Down-regulated
Sus_scrofa___STYXL2	-1.51458	7.28497	14.6741	0.000744846	0.0344912	3	7	Down-regulated
Sus_scrofa___DACH1	-1.79736	10.6199	14.6094	0.000761206	0.0347167	3	7	Down-regulated
Sus_scrofa___ENSSSCG00000035655	-2.77009	1.83914	14.2486	0.000762838	0.0347257	3	7	Down-regulated
Sus_scrofa___ZMYM1	-0.676172	6.70936	14.5568	0.000774811	0.0350726	3	7	Down-regulated
Sus_scrofa___ABRA	-1.75478	8.03538	14.4849	0.00079381	0.0357318	3	7	Down-regulated
Sus_scrofa___ENSSSCG00000021374	-1.06404	5.81257	14.4174	0.000812183	0.0363557	3	7	Down-regulated
Sus_scrofa___ENSSSCG00000033987	-0.87558	6.68749	14.3777	0.000823088	0.0366764	3	7	Down-regulated
Sus_scrofa___CRYBG3	-1.44176	10.0609	14.3744	0.000824002	0.0366764	3	7	Down-regulated
Sus_scrofa___NAALADL2	-1.05639	7.25066	14.3693	0.000825416	0.0366764	3	7	Down-regulated
Sus_scrofa___QRSL1	-0.839074	5.19357	14.3515	0.000830603	0.0368192	3	7	Down-regulated
Papio_anubis_RHOT1	-5.22534	0.295771	13.9988	0.000832437	0.0368192	3	7	Down-regulated
Sus_scrofa___ARGLU1	-0.799407	7.75231	14.2342	0.000864126	0.0376354	3	7	Down-regulated
Sus_scrofa___ZNF804B	-2.06519	8.91291	14.1684	0.000883672	0.0383485	3	7	Down-regulated
Sus_scrofa___VPS50	-0.680565	7.34639	14.1234	0.000897351	0.0387355	3	7	Down-regulated
Papio_anubis_ATP2A2	-2.1312	3.05751	14.122	0.000901544	0.0388451	3	7	Down-regulated
Sus_scrofa___BDH1	-1.61601	5.72801	14.0844	0.000909471	0.0390327	3	7	Down-regulated
Sus_scrofa___TRIP13	-0.923095	3.6111	14.0337	0.000927924	0.0396987	3	7	Down-regulated
Sus_scrofa___ESRRG	-0.981171	9.33183	13.9958	0.000937287	0.0400284	3	7	Down-regulated
Sus_scrofa___CD320	-1.92344	1.0473	13.6046	0.000951142	0.0403351	3	7	Down-regulated
Sus_scrofa___GCNT2	-1.13271	8.56197	13.9297	0.000958755	0.0405867	3	7	Down-regulated
Sus_scrofa___RCAN2	-0.944986	11.7611	13.8791	0.000975548	0.0410103	3	7	Down-regulated
Sus_scrofa___HOMER1	-1.12174	9.25669	13.8523	0.000984563	0.0412458	3	7	Down-regulated
Sus_scrofa___PDSS1	-0.813587	4.73982	13.8124	0.000998588	0.0417576	3	7	Down-regulated
Sus_scrofa___GYG1	-1.50079	7.44708	13.8064	0.00100023	0.0417576	3	7	Down-regulated
Sus_scrofa___PHLDB2	-0.967187	9.79543	13.7521	0.00101911	0.0423265	3	7	Down-regulated
Sus_scrofa___C6	-3.74783	0.941078	13.0871	0.00103275	0.042682	3	7	Down-regulated
Sus_scrofa___SFPQ	-0.762098	7.58672	13.7129	0.00103297	0.042682	3	7	Down-regulated
Sus_scrofa___RBFOX1	-1.06523	9.3247	13.6988	0.00103803	0.0428141	3	7	Down-regulated
Sus_scrofa___TECRL	-1.11815	10.7164	13.6891	0.00104151	0.0428141	3	7	Down-regulated
Sus_scrofa___ENSSSCG00000021322	-1.03571	6.85678	13.6614	0.00105152	0.0430075	3	7	Down-regulated
Sus_scrofa___RNF207	-1.23815	6.24282	13.6506	0.00105558	0.043028	3	7	Down-regulated
Sus_scrofa___OBSCN	-0.854177	9.92744	13.6428	0.00105828	0.0430654	3	7	Down-regulated
Sus_scrofa___SLC9B2	-1.25723	9.03343	13.5214	0.00110371	0.0441702	3	7	Down-regulated
Sus_scrofa___SP4	-0.707772	5.22182	13.4922	0.00111517	0.044555	3	7	Down-regulated
Sus_scrofa___ENSSSCG00000022044	-0.8781	6.38124	13.4326	0.00113835	0.0452571	3	7	Down-regulated
Sus_scrofa___ENSSSCG00000049158	-1.25692	7.06019	13.392	0.00115452	0.0454874	3	7	Down-regulated
Papio_anubis_ENSPANG00000017966	-2.89279	1.45556	12.8977	0.00118406	0.0462499	3	7	Down-regulated
Sus_scrofa___NIPSNAP2	-0.742719	7.27577	13.3188	0.00118437	0.0462499	3	7	Down-regulated
Sus_scrofa___ASXL3	-1.07157	6.9578	13.236	0.00121914	0.0468776	3	7	Down-regulated
Sus_scrofa___CNKSR3	-0.987986	7.30252	13.2315	0.00122103	0.0468776	3	7	Down-regulated
Sus_scrofa___GLMN	-0.828226	5.6889	13.2297	0.00122192	0.0468776	3	7	Down-regulated
Sus_scrofa___MYO18B	-1.07507	10.0261	13.1797	0.00124337	0.047377	3	7	Down-regulated
Sus_scrofa___MYOCD	-1.12442	10.4516	13.1796	0.00124345	0.047377	3	7	Down-regulated
Sus_scrofa___KAT6B	-0.817856	9.12403	13.0951	0.00128086	0.0484891	3	7	Down-regulated
Sus_scrofa___DTWD2	-0.859054	5.61253	13.0636	0.00129527	0.0488445	3	7	Down-regulated
Sus_scrofa___ENSSSCG00000044126	-5.37072	-0.213847	12.4771	0.00131397	0.0492345	3	7	Down-regulated
Sus_scrofa___ACTN2	-1.68013	11.8715	13.0186	0.0013158	0.0492345	3	7	Down-regulated
Sus_scrofa___CAMK2D	-0.960628	11.7323	13.0068	0.0013213	0.049364	3	7	Down-regulated
Sus_scrofa___ASPH	-0.681164	7.46139	12.9975	0.00132562	0.049449	3	7	Down-regulated
Sus_scrofa___ENSSSCG00000028635	-0.756851	6.458	12.9492	0.00134845	0.0499153	3	7	Down-regulated

## Sheet: Hypoxia_vCM
Gene	logFC	logCPM	F	PValue	FDR	Observations_6month_protocol	Observations_3month_protocol	level
Sus_scrofa___MX2	7.28366	4.97972	76.7543	9.77423e-11	2.57375e-06	3	7	Up-regulated
Sus_scrofa___ENSSSCG00000016263	4.75127	3.50419	79.0945	2.66993e-10	3.51523e-06	3	7	Up-regulated
Sus_scrofa___FOXS1	5.91505	3.92826	55.4754	2.00735e-08	0.000147039	3	7	Up-regulated
Sus_scrofa___SEMA4B	1.5699	6.81728	59.9328	2.23362e-08	0.000147039	3	7	Up-regulated
Sus_scrofa___RSAD2	7.56127	5.82893	55.855	5.78241e-08	0.000304525	3	7	Up-regulated
Sus_scrofa___ETV5	3.16564	1.90651	48.6421	8.42069e-08	0.000369556	3	7	Up-regulated
Sus_scrofa___HELB	2.08774	5.46611	50.4644	1.10996e-07	0.000417537	3	7	Up-regulated
Sus_scrofa___HERC5	4.85392	5.57997	48.1472	1.74034e-07	0.00052598	3	7	Up-regulated
Sus_scrofa___ENSSSCG00000014672	4.20793	1.24124	38.6852	1.79775e-07	0.00052598	3	7	Up-regulated
Sus_scrofa___NDRG1	2.94488	1.78251	40.3953	2.42379e-07	0.000638233	3	7	Up-regulated
Sus_scrofa___MX1	5.49622	5.75625	41.748	2.87654e-07	0.000688592	3	7	Up-regulated
Sus_scrofa___OAS2	4.40098	6.64398	44.0813	3.70397e-07	0.000812775	3	7	Up-regulated
Sus_scrofa___ANKRD37	2.80072	3.94488	43.4241	4.26735e-07	0.000864368	3	7	Up-regulated
Sus_scrofa___ENSSSCG00000031307	2.22249	3.22222	42.8357	4.63737e-07	0.000872223	3	7	Up-regulated
Sus_scrofa___IFIT1	4.08742	5.60467	39.6966	6.46458e-07	0.00113484	3	7	Up-regulated
Sus_scrofa___PNOC	2.41911	3.27264	41.0374	6.92602e-07	0.00113985	3	7	Up-regulated
Sus_scrofa___ENSSSCG00000016868	3.51908	0.67879	32.3961	1.00912e-06	0.00153683	3	7	Up-regulated
Sus_scrofa___LURAP1L	3.8058	3.32599	36.1954	1.148e-06	0.00156539	3	7	Up-regulated
Sus_scrofa___CTSH	2.77509	4.94945	38.3454	1.18897e-06	0.00156539	3	7	Up-regulated
Sus_scrofa___ENSSSCG00000045077	6.92993	0.311567	42.4599	1.37186e-06	0.00165903	3	7	Up-regulated
Sus_scrofa___MOV10	2.62972	3.74119	37.7394	1.38609e-06	0.00165903	3	7	Up-regulated
Sus_scrofa___KLK8	3.20574	1.01655	32.7964	1.56226e-06	0.00173579	3	7	Up-regulated
Sus_scrofa___CCDC83	2.69828	2.11624	34.9553	1.61748e-06	0.00173579	3	7	Up-regulated
Sus_scrofa___ADM	3.28343	3.04643	36.4543	1.64798e-06	0.00173579	3	7	Up-regulated
Sus_scrofa___SSUH2	2.58841	1.01599	32.7119	1.94726e-06	0.00189908	3	7	Up-regulated
Sus_scrofa___BST2	4.97094	3.34187	35.3235	2.26885e-06	0.00206815	3	7	Up-regulated
Sus_scrofa___TYRP1	4.18542	1.42054	30.5633	2.4853e-06	0.00216844	3	7	Up-regulated
Sus_scrofa___UBE2L6	3.84353	2.71299	30.9426	2.56625e-06	0.00216844	3	7	Up-regulated
Sus_scrofa___ENSSSCG00000051689	3.21973	1.39675	30.1746	2.6352e-06	0.00216844	3	7	Up-regulated
Sus_scrofa___TUFT1	2.51734	2.89315	34.6491	2.75889e-06	0.00220143	3	7	Up-regulated
Sus_scrofa___NXPE3	2.18521	2.63855	33.6132	3.46547e-06	0.00256707	3	7	Up-regulated
Sus_scrofa___SLC22A18	2.75196	2.41155	33.0704	3.53034e-06	0.00256707	3	7	Up-regulated
Sus_scrofa___ENSSSCG00000031163	4.15044	0.511268	28.9911	3.60707e-06	0.00256707	3	7	Up-regulated
Sus_scrofa___OPALIN	3.3993	0.639375	27.93	4.23694e-06	0.00279778	3	7	Up-regulated
Sus_scrofa___TMEM45A	2.49425	3.07578	32.1647	4.31326e-06	0.00279778	3	7	Up-regulated
Sus_scrofa___TECTB	3.02424	1.06237	28.2984	4.35625e-06	0.00279778	3	7	Up-regulated
Sus_scrofa___CCDC194	3.34521	0.979219	27.0733	4.61554e-06	0.00285664	3	7	Up-regulated
Sus_scrofa___LHFPL4	2.21879	1.27948	30.898	4.66488e-06	0.00285664	3	7	Up-regulated
Sus_scrofa___SP110	3.46246	3.10079	31.7444	5.02953e-06	0.00293845	3	7	Up-regulated
Sus_scrofa___ODC1	2.34151	4.44892	31.8829	5.10213e-06	0.00293845	3	7	Up-regulated
Sus_scrofa___PLEKHA4	2.90911	4.20176	31.9319	5.13324e-06	0.00293845	3	7	Up-regulated
Sus_scrofa___ENSSSCG00000017754	2.47189	3.79327	31.6335	5.28539e-06	0.00296117	3	7	Up-regulated
Sus_scrofa___RAB3B	3.28774	3.08268	31.5465	5.61492e-06	0.00307209	3	7	Up-regulated
Sus_scrofa___FLT1	2.36915	4.76063	31.4199	5.71671e-06	0.00307209	3	7	Up-regulated
Sus_scrofa___OASL	2.40826	1.55766	29.1442	5.9754e-06	0.00314688	3	7	Up-regulated
Sus_scrofa___IFIT2	3.9763	4.02173	30.5825	6.25587e-06	0.00322999	3	7	Up-regulated
Sus_scrofa___FRMD4A	2.1607	5.68497	30.6982	6.75673e-06	0.0034215	3	7	Up-regulated
Sus_scrofa___DUSP4	2.99919	2.85804	28.5337	6.89708e-06	0.00342668	3	7	Up-regulated
Sus_scrofa___CAMK1	1.79511	3.61364	30.3755	7.40605e-06	0.00360236	3	7	Up-regulated
Sus_scrofa___PSMB9	2.35554	2.2816	27.8891	7.5873e-06	0.00360236	3	7	Up-regulated
Sus_scrofa___KDM5B	1.13463	7.80195	30.1704	7.67818e-06	0.00360236	3	7	Up-regulated
Sus_scrofa___ENSSSCG00000025593	3.69878	1.44355	26.8963	7.7979e-06	0.00360236	3	7	Up-regulated
Sus_scrofa___FBXO39	1.93871	7.31114	29.928	8.15097e-06	0.00370054	3	7	Up-regulated
Sus_scrofa___PARP14	3.55604	3.41344	27.6495	8.72887e-06	0.00383081	3	7	Up-regulated
Sus_scrofa___LONP1	1.35732	4.6034	28.8863	1.05814e-05	0.00437896	3	7	Up-regulated
Sus_scrofa___SIGLEC1	3.1108	1.22178	25.9806	1.06431e-05	0.00437896	3	7	Up-regulated
Sus_scrofa___LRRC69	2.29662	2.0168	28.2239	1.19009e-05	0.00454132	3	7	Up-regulated
Sus_scrofa___MYO7B	2.09131	3.23711	28.4977	1.19339e-05	0.00454132	3	7	Up-regulated
Sus_scrofa___UPP1	2.66484	4.08923	26.8153	1.20069e-05	0.00454132	3	7	Up-regulated
Sus_scrofa___SERP2	1.56431	4.42217	28.3674	1.20725e-05	0.00454132	3	7	Up-regulated
Sus_scrofa___TLL2	2.40816	4.22772	28.2925	1.24794e-05	0.00461457	3	7	Up-regulated
Sus_scrofa___MROH5	2.44003	4.91649	28.1893	1.26315e-05	0.00461457	3	7	Up-regulated
Sus_scrofa___ZNF395	1.17132	7.6618	27.6474	1.44701e-05	0.00501352	3	7	Up-regulated
Sus_scrofa___CD109	1.6332	3.87815	27.5642	1.48676e-05	0.00508435	3	7	Up-regulated
Sus_scrofa___TBXAS1	2.55667	3.31696	27.5751	1.51521e-05	0.00511519	3	7	Up-regulated
Sus_scrofa___PAFAH1B3	2.21978	2.32532	27.4163	1.55357e-05	0.00517829	3	7	Up-regulated
Sus_scrofa___P4HB	1.59706	4.90858	26.814	1.79876e-05	0.00589918	3	7	Up-regulated
Sus_scrofa___ADCY3	1.62073	2.24924	26.7506	1.86152e-05	0.00592207	3	7	Up-regulated
Sus_scrofa___BAALC	2.98655	2.49563	26.1693	1.86787e-05	0.00592207	3	7	Up-regulated
Sus_scrofa___PLSCR1	1.95238	4.42561	26.5416	1.93954e-05	0.00593859	3	7	Up-regulated
Sus_scrofa___SRGN	2.71942	0.846864	23.909	1.98291e-05	0.00600162	3	7	Up-regulated
Sus_scrofa___ENSSSCG00000023228	1.42594	3.95629	26.2271	2.10854e-05	0.00623844	3	7	Up-regulated
Sus_scrofa___TMEM51	3.09371	1.97558	24.6164	2.39001e-05	0.00684062	3	7	Up-regulated
Sus_scrofa___UNC5D	1.65922	3.84069	25.5001	2.56136e-05	0.00725224	3	7	Up-regulated
Sus_scrofa___ISG20	4.80987	0.863837	23.0881	2.82673e-05	0.00787222	3	7	Up-regulated
Sus_scrofa___ENO1	1.55543	8.29102	25.0436	2.87626e-05	0.00788826	3	7	Up-regulated
Sus_scrofa___RNF165	2.15044	4.39003	25.0235	2.90582e-05	0.00788826	3	7	Up-regulated
Sus_scrofa___ZNFX1	1.90928	5.52337	24.8168	3.06282e-05	0.00822962	3	7	Up-regulated
Sus_scrofa___ABCC11	1.64876	1.37893	24.099	3.22534e-05	0.00857875	3	7	Up-regulated
Sus_scrofa___ACAP1	2.82192	0.897816	21.9937	3.27409e-05	0.00858839	3	7	Up-regulated
Sus_scrofa___PARP9	3.35215	3.52362	24.4416	3.29419e-05	0.00858839	3	7	Up-regulated
Sus_scrofa___ENSSSCG00000004404	2.5443	1.19774	22.0028	3.61219e-05	0.00932512	3	7	Up-regulated
Sus_scrofa___BICDL2	2.19478	2.34774	23.2149	3.76142e-05	0.00952362	3	7	Up-regulated
Sus_scrofa___CSDC2	2.4095	3.02479	23.9074	3.96701e-05	0.0099485	3	7	Up-regulated
Sus_scrofa___PMM1	1.62202	3.61456	23.8209	4.05899e-05	0.0100529	3	7	Up-regulated
Sus_scrofa___EIF4EBP1	1.78232	4.57847	23.7803	4.08499e-05	0.0100529	3	7	Up-regulated
Sus_scrofa___OSBPL10	1.75255	4.2234	23.6907	4.19551e-05	0.0102293	3	7	Up-regulated
Sus_scrofa___TMEM108	1.7721	4.35045	23.4767	4.4378e-05	0.0105979	3	7	Up-regulated
Sus_scrofa___ENSSSCG00000028691	2.03343	2.54391	23.5106	4.44208e-05	0.0105979	3	7	Up-regulated
Sus_scrofa___IDH2	1.00061	7.8818	23.408	4.51266e-05	0.0105979	3	7	Up-regulated
Sus_scrofa___BNIP3	1.8711	7.7589	23.3398	4.59994e-05	0.0105979	3	7	Up-regulated
Sus_scrofa___DYTN	1.9553	1.5261	22.9908	4.67146e-05	0.0105979	3	7	Up-regulated
Sus_scrofa___TOP2A	2.73097	0.494038	20.5931	4.68338e-05	0.0105979	3	7	Up-regulated
Sus_scrofa___NETO1	2.75898	1.89041	22.5847	4.70894e-05	0.0105979	3	7	Up-regulated
Sus_scrofa___UFM1	1.21856	6.1391	23.1322	4.87706e-05	0.0107918	3	7	Up-regulated
Sus_scrofa___FAM180A	2.25389	3.56506	22.9938	5.1545e-05	0.0110389	3	7	Up-regulated
Sus_scrofa___IFIT5	2.48005	4.38735	22.9157	5.23082e-05	0.0110389	3	7	Up-regulated
Sus_scrofa___H1-3	2.69609	4.23588	22.8986	5.28007e-05	0.0110389	3	7	Up-regulated
Sus_scrofa___MED12L	1.52234	5.00734	22.8228	5.3286e-05	0.0110389	3	7	Up-regulated
Sus_scrofa___PLEKHO1	1.67607	2.94883	22.7895	5.34147e-05	0.0110389	3	7	Up-regulated
Sus_scrofa___GRM2	1.94172	2.1174	22.8097	5.34373e-05	0.0110389	3	7	Up-regulated
Sus_scrofa___TRIM72	1.97497	2.61586	22.7583	5.37359e-05	0.0110389	3	7	Up-regulated
Sus_scrofa___G6PD	1.67343	2.68257	22.8651	5.38524e-05	0.0110389	3	7	Up-regulated
Sus_scrofa___MAP1B	1.09665	7.20369	22.7663	5.40796e-05	0.0110389	3	7	Up-regulated
Sus_scrofa___CMPK2	4.55195	4.20595	23.8773	5.49803e-05	0.0110515	3	7	Up-regulated
Sus_scrofa___SLC39A12	2.38091	1.88393	21.8739	5.61727e-05	0.0111055	3	7	Up-regulated
Sus_scrofa___BRSK2	2.81551	0.615577	19.9719	5.65144e-05	0.0111055	3	7	Up-regulated
Sus_scrofa___ENSSSCG00000007944	1.97574	1.6719	21.5062	5.69881e-05	0.0111156	3	7	Up-regulated
Sus_scrofa___DNAJB9	1.55423	5.10379	22.4253	5.96969e-05	0.0113618	3	7	Up-regulated
Sus_scrofa___FAM162A	1.02746	7.60853	22.4032	5.99759e-05	0.0113618	3	7	Up-regulated
Sus_scrofa___KAZN	1.01248	4.99726	22.313	6.15888e-05	0.0115239	3	7	Up-regulated
Sus_scrofa___ENSSSCG00000011859	1.8596	3.17001	22.3608	6.18763e-05	0.0115239	3	7	Up-regulated
Sus_scrofa___CCL5	3.12828	1.74836	21.5731	6.21447e-05	0.0115239	3	7	Up-regulated
Sus_scrofa___ZNF367	2.5493	0.697595	20.1507	6.3457e-05	0.011685	3	7	Up-regulated
Sus_scrofa___MECOM	2.4635	3.70681	22.04	6.73415e-05	0.0122292	3	7	Up-regulated
Sus_scrofa___DTX3L	3.31669	3.13318	21.4564	6.84443e-05	0.0122604	3	7	Up-regulated
Sus_scrofa___ENSSSCG00000027907	1.03231	5.83276	21.9179	6.89753e-05	0.012272	3	7	Up-regulated
Sus_scrofa___LONRF2	2.64676	1.75851	21.3905	7.13785e-05	0.0126144	3	7	Up-regulated
Sus_scrofa___ENSSSCG00000013717	1.84978	2.16246	21.7	7.2394e-05	0.0127085	3	7	Up-regulated
Sus_scrofa___OCEL1	1.72743	1.65519	21.2878	7.81118e-05	0.0136215	3	7	Up-regulated
Sus_scrofa___CAVIN2	2.31517	5.97117	21.4643	7.8706e-05	0.0136348	3	7	Up-regulated
Sus_scrofa___LAT2	1.68887	2.81374	21.4392	8.10238e-05	0.0138852	3	7	Up-regulated
Sus_scrofa___UBA7	5.89214	0.178039	23.5384	8.18239e-05	0.0138852	3	7	Up-regulated
Sus_scrofa___ERBB3	1.49852	4.34381	21.3374	8.20108e-05	0.0138852	3	7	Up-regulated
Sus_scrofa___DDX60	3.88088	5.76303	21.0164	8.22608e-05	0.0138852	3	7	Up-regulated
Sus_scrofa___AANAT	1.94255	0.900655	19.4783	8.31236e-05	0.0139415	3	7	Up-regulated
Sus_scrofa___HS3ST1	2.8085	1.1	19.6123	8.70266e-05	0.0142437	3	7	Up-regulated
Sus_scrofa___ENSSSCG00000006350	1.96464	2.70769	21.132	8.80991e-05	0.0142437	3	7	Up-regulated
Sus_scrofa___ENSSSCG00000044640	2.67775	0.641277	18.6983	9.20874e-05	0.0146075	3	7	Up-regulated
Sus_scrofa___TRIOBP	1.56497	4.84051	20.8391	9.46907e-05	0.0149305	3	7	Up-regulated
Sus_scrofa___CHD3	1.27812	4.22225	20.778	9.65407e-05	0.0150421	3	7	Up-regulated
Sus_scrofa___TMEM254	2.19222	1.78801	20.4603	9.90624e-05	0.0153442	3	7	Up-regulated
Sus_scrofa___TACR2	1.79142	5.26171	20.4452	0.000106429	0.0162053	3	7	Up-regulated
Sus_scrofa___SYNE3	1.0292	4.85187	20.3464	0.000109611	0.0165878	3	7	Up-regulated
Sus_scrofa___CDH16	2.53868	0.650938	18.5534	0.00011335	0.016914	3	7	Up-regulated
Sus_scrofa___SLC37A2	1.77762	2.1973	20.2565	0.000113694	0.016914	3	7	Up-regulated
Sus_scrofa___ENSSSCG00000049674	2.50522	1.04759	18.6701	0.000116124	0.0171786	3	7	Up-regulated
Sus_scrofa___CD86	2.51108	0.218709	17.9162	0.000118481	0.0173646	3	7	Up-regulated
Sus_scrofa___KLF2	2.42093	1.52436	19.3088	0.0001187	0.0173646	3	7	Up-regulated
Sus_scrofa___ENSSSCG00000049813	1.85621	2.41049	20.086	0.000119814	0.0174306	3	7	Up-regulated
Sus_scrofa___TRIM22	3.46036	0.944328	18.4093	0.000120834	0.0174758	3	7	Up-regulated
Sus_scrofa___ZNF484	1.49956	3.18482	20.0504	0.000121452	0.0174758	3	7	Up-regulated
Sus_scrofa___LIN7A	2.09188	2.90665	19.4768	0.000123431	0.0175164	3	7	Up-regulated
Sus_scrofa___ERICH6	2.49493	3.69352	19.9629	0.000124524	0.0175164	3	7	Up-regulated
Sus_scrofa___ZMYND8	0.973383	7.74741	19.8894	0.000125665	0.0175164	3	7	Up-regulated
Sus_scrofa___ELAPOR2	1.90904	6.647	19.7055	0.000132889	0.0183206	3	7	Up-regulated
Sus_scrofa___BLNK	1.60207	1.37677	18.7301	0.00013814	0.0187324	3	7	Up-regulated
Sus_scrofa___ETV7	3.04614	1.1008	17.4899	0.000139767	0.0187324	3	7	Up-regulated
Sus_scrofa___TLR3	2.47307	1.39363	18.6939	0.000139947	0.0187324	3	7	Up-regulated
Sus_scrofa___TNNT1	1.64319	5.98542	19.5313	0.000140144	0.0187324	3	7	Up-regulated
Sus_scrofa___TRAF3IP2	0.992093	6.65571	19.4609	0.000143174	0.0189553	3	7	Up-regulated
Sus_scrofa___ENSSSCG00000045769	3.32119	3.938	19.4941	0.000143972	0.0189553	3	7	Up-regulated
Sus_scrofa___TMEFF2	2.17708	1.9691	19.3129	0.000146062	0.0189673	3	7	Up-regulated
Sus_scrofa___CPLX4	1.86461	1.84578	19.1816	0.000146224	0.0189673	3	7	Up-regulated
Sus_scrofa___TRANK1	1.79951	5.08937	19.2592	0.000152453	0.0195825	3	7	Up-regulated
Sus_scrofa___HMCN1	2.16378	6.50583	19.2022	0.000155166	0.0197412	3	7	Up-regulated
Sus_scrofa___ENSSSCG00000013880	2.70558	4.38005	19.2435	0.000155329	0.0197412	3	7	Up-regulated
Sus_scrofa___ENSSSCG00000011559	0.99039	5.37885	19.1376	0.000158159	0.0198316	3	7	Up-regulated
Sus_scrofa___ENSSSCG00000028892	1.7487	2.85201	19.1177	0.000161384	0.0198534	3	7	Up-regulated
Sus_scrofa___OSMR	1.87573	5.94656	19.0654	0.000161776	0.0198534	3	7	Up-regulated
Sus_scrofa___PAX6	5.00165	-0.384976	18.9222	0.000164937	0.0198534	3	7	Up-regulated
Sus_scrofa___ISG12(A)	3.99001	5.79065	18.2266	0.000165103	0.0198534	3	7	Up-regulated
Sus_scrofa___RASGRF1	1.60998	2.82958	19.0559	0.000165118	0.0198534	3	7	Up-regulated
Sus_scrofa___MDH1B	2.28296	0.852348	17.689	0.000170236	0.0202032	3	7	Up-regulated
Sus_scrofa___ENSSSCG00000014186	1.66245	1.85362	18.8727	0.000170329	0.0202032	3	7	Up-regulated
Sus_scrofa___ARNTL2	1.77483	4.96857	18.8044	0.000175726	0.0206573	3	7	Up-regulated
Sus_scrofa___COL16A1	2.36452	2.73379	18.6443	0.000185427	0.021665	3	7	Up-regulated
Sus_scrofa___TNMD	2.80819	0.224553	16.5183	0.000187964	0.0217126	3	7	Up-regulated
Sus_scrofa___MGAT4A	1.44399	6.82457	18.5706	0.000188492	0.0217126	3	7	Up-regulated
Sus_scrofa___KCTD8	1.8135	3.97834	18.5733	0.000189651	0.0217126	3	7	Up-regulated
Sus_scrofa___ENSSSCG00000017146	2.72684	6.70446	18.528	0.000191056	0.0217221	3	7	Up-regulated
Sus_scrofa___IFFO2	2.15029	2.19421	18.4195	0.000194437	0.0219738	3	7	Up-regulated
Sus_scrofa___GSTT4	2.89592	1.59195	17.2535	0.000196898	0.022157	3	7	Up-regulated
Sus_scrofa___RAB27B	3.01805	3.10786	18.4297	0.000200541	0.0223211	3	7	Up-regulated
Sus_scrofa___CCDC180	1.54206	5.4687	18.3488	0.000202143	0.0223211	3	7	Up-regulated
Sus_scrofa___GTPBP2	1.35125	5.74269	18.344	0.000202389	0.0223211	3	7	Up-regulated
Sus_scrofa___ENSSSCG00000035371	2.59086	1.76209	17.6994	0.000203578	0.0223211	3	7	Up-regulated
Sus_scrofa___PRRT3	2.39645	0.395549	16.7061	0.000204813	0.0223211	3	7	Up-regulated
Sus_scrofa___AK4	2.18462	4.83255	18.1914	0.000205634	0.0223211	3	7	Up-regulated
Sus_scrofa___GRM3	2.51795	3.59185	18.3378	0.000205987	0.0223211	3	7	Up-regulated
Sus_scrofa___PRKCE	1.07533	10.4976	18.0576	0.000221439	0.0235122	3	7	Up-regulated
Sus_scrofa___ARRDC3	1.80429	3.94846	18.0429	0.000223454	0.0235122	3	7	Up-regulated
Sus_scrofa___MYORG	0.972253	6.27975	17.9887	0.000226343	0.0235576	3	7	Up-regulated
Sus_scrofa___SEMA5B	1.90615	1.85309	17.4892	0.000228601	0.0236989	3	7	Up-regulated
Sus_scrofa___HAP1	1.75099	0.698605	16.6895	0.000229515	0.0237003	3	7	Up-regulated
Sus_scrofa___LRRC55	1.88414	0.347242	16.2946	0.000230622	0.0237216	3	7	Up-regulated
Sus_scrofa___SEPTIN11	1.37891	5.81948	17.8791	0.000234383	0.0239216	3	7	Up-regulated
Sus_scrofa___MCF2L2	1.36321	4.86505	17.7954	0.000240822	0.0243897	3	7	Up-regulated
Sus_scrofa___AKAP7	1.35691	5.93129	17.7455	0.000244537	0.0244441	3	7	Up-regulated
Sus_scrofa___SNAPC1	1.39144	8.59796	17.7375	0.000245115	0.0244441	3	7	Up-regulated
Sus_scrofa___HMOX1	2.34784	1.59933	16.716	0.000246	0.0244441	3	7	Up-regulated
Sus_scrofa___NOA1	0.88523	5.94323	17.6941	0.000248562	0.0246058	3	7	Up-regulated
Sus_scrofa___ENSSSCG00000009208	1.03071	7.16248	17.6799	0.000249668	0.0246227	3	7	Up-regulated
Sus_scrofa___OLFML2B	3.73794	-0.328295	16.444	0.000255183	0.0247873	3	7	Up-regulated
Sus_scrofa___TMEM145	1.54408	3.23472	17.6384	0.000255557	0.0247873	3	7	Up-regulated
Sus_scrofa___ENSSSCG00000014997	2.58139	1.5335	16.712	0.000258794	0.0247977	3	7	Up-regulated
Sus_scrofa___ENSSSCG00000049426	3.13473	0.253151	16.8248	0.000259605	0.0247977	3	7	Up-regulated
Sus_scrofa___MKNK2	1.08378	5.19344	17.5488	0.000260436	0.0247977	3	7	Up-regulated
Sus_scrofa___SHFL	3.74152	-0.00563966	17.6108	0.00026086	0.0247977	3	7	Up-regulated
Sus_scrofa___TRIM21	2.31533	3.76689	17.5281	0.000264694	0.0249818	3	7	Up-regulated
Sus_scrofa___ENSSSCG00000044305	4.23283	0.197587	16.7841	0.000265731	0.0249901	3	7	Up-regulated
Sus_scrofa___HES4	3.10064	0.999323	16.5882	0.00026731	0.0250491	3	7	Up-regulated
Sus_scrofa___TRIB3	2.62576	3.74162	17.4551	0.000272677	0.0252889	3	7	Up-regulated
Sus_scrofa___MMP25	2.22562	3.49972	16.715	0.000272749	0.0252889	3	7	Up-regulated
Sus_scrofa___ENSSSCG00000043076	3.58462	0.207718	16.0148	0.000278991	0.025702	3	7	Up-regulated
Sus_scrofa___EMB	1.75368	3.06406	17.3513	0.000279157	0.025702	3	7	Up-regulated
Sus_scrofa___TSPAN5	2.00092	2.82643	17.3364	0.00028052	0.0257375	3	7	Up-regulated
Sus_scrofa___PES1	1.02514	3.77172	17.303	0.000282607	0.025839	3	7	Up-regulated
Sus_scrofa___ENSSSCG00000031798	2.10058	1.6753	16.8261	0.000286542	0.0260934	3	7	Up-regulated
Sus_scrofa___LIPH	2.37874	0.183495	15.3686	0.000287372	0.0260934	3	7	Up-regulated
Sus_scrofa___ZNF510	1.38967	2.74637	17.2545	0.000289508	0.0261063	3	7	Up-regulated
Sus_scrofa___GEMIN8	1.19062	3.0627	17.1209	0.000302048	0.0268024	3	7	Up-regulated
Sus_scrofa___PFKFB3	2.14395	6.14211	17.087	0.000302306	0.0268024	3	7	Up-regulated
Sus_scrofa___GK5	1.3268	5.28888	17.0465	0.000306272	0.0270629	3	7	Up-regulated
Sus_scrofa___ELF4	1.84886	1.83015	16.4111	0.000314286	0.0276782	3	7	Up-regulated
Sus_scrofa___GDAP1	2.10913	1.55292	16.4645	0.000317147	0.027837	3	7	Up-regulated
Sus_scrofa___ENSSSCG00000001931	3.20144	3.50795	16.9592	0.000319271	0.0279055	3	7	Up-regulated
Sus_scrofa___ENSSSCG00000006324	1.37359	3.90225	16.8432	0.000328138	0.0285166	3	7	Up-regulated
Sus_scrofa___LOXL2	1.67026	6.07106	16.7386	0.000338542	0.0291323	3	7	Up-regulated
Sus_scrofa___ENSSSCG00000003079	1.8469	4.04117	16.75	0.000340236	0.0291827	3	7	Up-regulated
Sus_scrofa___ENSSSCG00000032436	4.31357	2.13059	15.8889	0.000344058	0.0294147	3	7	Up-regulated
Sus_scrofa___SLC6A6	2.20667	5.70611	16.6531	0.000348185	0.0296713	3	7	Up-regulated
Sus_scrofa___LINGO1	1.50595	1.98017	16.6366	0.00035137	0.0298461	3	7	Up-regulated
Sus_scrofa___EARS2	1.05227	3.9126	16.6079	0.000354075	0.0299791	3	7	Up-regulated
Sus_scrofa___GPR171	2.42117	1.02386	15.6769	0.000357513	0.030021	3	7	Up-regulated
Sus_scrofa___PRR19	1.8531	1.96801	16.3393	0.00035799	0.030021	3	7	Up-regulated
Sus_scrofa___ACOXL	2.31822	3.61129	16.5307	0.000364985	0.0303305	3	7	Up-regulated
Sus_scrofa___ENSSSCG00000029160	2.96889	4.72734	16.5238	0.000365137	0.0303305	3	7	Up-regulated
Sus_scrofa___SLC22A17	2.98375	0.239897	14.8162	0.000370964	0.0305378	3	7	Up-regulated
Sus_scrofa___TEX33	2.18418	0.0977857	14.8374	0.000371111	0.0305378	3	7	Up-regulated
Sus_scrofa___TNNT3	1.29766	3.79626	16.4568	0.000372338	0.0305433	3	7	Up-regulated
Sus_scrofa___ENSSSCG00000049976	2.21087	1.5082	15.9815	0.000375429	0.0305773	3	7	Up-regulated
Sus_scrofa___DNAJB13	1.49182	2.27298	16.4366	0.00037664	0.0305773	3	7	Up-regulated
Sus_scrofa___ENSSSCG00000038575	1.81551	2.00719	16.3681	0.000377397	0.0305773	3	7	Up-regulated
Sus_scrofa___PPP2R2C	1.84302	2.19988	16.3799	0.000381624	0.0307306	3	7	Up-regulated
Sus_scrofa___ENSSSCG00000033553	2.81871	-0.0610772	14.8271	0.000384087	0.0308347	3	7	Up-regulated
Sus_scrofa___AKR1D1	1.64338	5.74007	16.3077	0.000389846	0.0311446	3	7	Up-regulated
Sus_scrofa___IMPDH1	2.91174	0.552545	14.9959	0.000390313	0.0311446	3	7	Up-regulated
Sus_scrofa___GSTA4	1.84409	2.28196	16.2773	0.000396617	0.0314569	3	7	Up-regulated
Sus_scrofa___NARF	0.999296	6.17213	16.218	0.000401485	0.0316211	3	7	Up-regulated
Sus_scrofa___CADPS2	2.0502	4.03244	16.2259	0.000401651	0.0316211	3	7	Up-regulated
Sus_scrofa___ENSSSCG00000001398	2.4187	1.57063	15.1977	0.000408133	0.0317958	3	7	Up-regulated
Sus_scrofa___RNF19B	1.24285	5.22697	16.1174	0.000415335	0.0321664	3	7	Up-regulated
Sus_scrofa___MPI	1.18837	3.29387	16.046	0.000427478	0.0329716	3	7	Up-regulated
Sus_scrofa___ENSSSCG00000040820	1.62825	1.07708	15.5407	0.000429438	0.0329716	3	7	Up-regulated
Sus_scrofa___CLCA1	2.04305	3.22484	16.045	0.000429487	0.0329716	3	7	Up-regulated
Sus_scrofa___CAMK4	1.02683	2.80934	15.9896	0.00043771	0.0335052	3	7	Up-regulated
Sus_scrofa___TSPO	1.68433	3.28207	15.9575	0.000441318	0.033553	3	7	Up-regulated
Sus_scrofa___KLF5	1.9142	1.7478	15.2179	0.000442158	0.033553	3	7	Up-regulated
Sus_scrofa___ENSSSCG00000009211	1.80169	3.86372	15.9257	0.000444169	0.0336088	3	7	Up-regulated
Sus_scrofa___TTC24	2.56327	0.103536	14.4091	0.000445807	0.0336361	3	7	Up-regulated
Sus_scrofa___TRIM7	1.86979	1.08401	15.236	0.000453783	0.033946	3	7	Up-regulated
Sus_scrofa___EGLN3	1.2484	7.46738	15.7361	0.000471348	0.0350608	3	7	Up-regulated
Sus_scrofa___RAD1	1.54085	3.44601	15.6977	0.000481048	0.0355813	3	7	Up-regulated
Sus_scrofa___SRRM3	1.46295	2.6361	15.679	0.000487164	0.0358324	3	7	Up-regulated
Sus_scrofa___LIMK1	1.17844	3.79809	15.6357	0.000489889	0.0358564	3	7	Up-regulated
Sus_scrofa___P3H1	0.82258	6.91814	15.6035	0.000492806	0.0359462	3	7	Up-regulated
Sus_scrofa___PML	2.30617	6.03443	15.5667	0.000499124	0.0363065	3	7	Up-regulated
Sus_scrofa___P2RY14	2.07742	2.00774	14.9791	0.000507084	0.0366828	3	7	Up-regulated
Sus_scrofa___ADAR	1.40672	5.60524	15.5036	0.000509779	0.0367767	3	7	Up-regulated
Sus_scrofa___COL1A1	2.05888	2.69032	14.8812	0.000515271	0.0370714	3	7	Up-regulated
Sus_scrofa___CDK7	0.862864	5.01284	15.4594	0.00051752	0.0371317	3	7	Up-regulated
Sus_scrofa___TMEM245	0.95078	9.00527	15.4428	0.000520213	0.0371996	3	7	Up-regulated
Sus_scrofa___KCNAB1	1.47582	5.66224	15.4075	0.000526596	0.0371996	3	7	Up-regulated
Sus_scrofa___CMAS	1.04381	4.69612	15.4058	0.000527257	0.0371996	3	7	Up-regulated
Sus_scrofa___RABIF	1.40049	2.97644	15.4147	0.000530499	0.0371996	3	7	Up-regulated
Sus_scrofa___CTBS	1.52811	1.78286	15.1665	0.000530737	0.0371996	3	7	Up-regulated
Sus_scrofa___ARHGEF39	1.66221	3.17662	15.3961	0.000530991	0.0371996	3	7	Up-regulated
Sus_scrofa___NINJ1	0.982586	4.38337	15.3781	0.000532513	0.0371996	3	7	Up-regulated
Sus_scrofa___ENSSSCG00000036595	1.11124	5.18828	15.3288	0.000540858	0.0375716	3	7	Up-regulated
Sus_scrofa___ENSSSCG00000009530	1.40391	3.73489	15.3313	0.000541961	0.0375716	3	7	Up-regulated
Sus_scrofa___ZBP1	3.4478	0.194844	14.5807	0.000551099	0.0380294	3	7	Up-regulated
Sus_scrofa___HGS	0.982196	5.15088	15.2701	0.000551696	0.0380294	3	7	Up-regulated
Sus_scrofa___RUNX1	1.72163	1.76318	15.0038	0.00055674	0.0382769	3	7	Up-regulated
Sus_scrofa___LIPA	1.81664	5.83969	15.1079	0.000582916	0.0396624	3	7	Up-regulated
Sus_scrofa___CATSPERD	2.01179	1.60281	14.9255	0.000588525	0.0397246	3	7	Up-regulated
Sus_scrofa___SRXN1	1.97736	3.19548	15.0408	0.0005887	0.0397246	3	7	Up-regulated
Sus_scrofa___ENSSSCG00000040253	2.06737	1.01274	14.2223	0.000596165	0.0400465	3	7	Up-regulated
Sus_scrofa___WTIP	1.28902	5.7029	15.004	0.000603947	0.040466	3	7	Up-regulated
Sus_scrofa___ENSSSCG00000035799	1.99053	1.52204	14.372	0.000616084	0.0409073	3	7	Up-regulated
Sus_scrofa___REST	0.782449	6.36213	14.9405	0.000617124	0.0409073	3	7	Up-regulated
Sus_scrofa___ENSSSCG00000033720	1.75303	2.85001	14.9617	0.000619671	0.0409073	3	7	Up-regulated
Sus_scrofa___ENSSSCG00000016527	1.43381	4.08891	14.8786	0.000631661	0.041426	3	7	Up-regulated
Sus_scrofa___CHRNB1	1.35046	2.88185	14.8949	0.000632434	0.041426	3	7	Up-regulated
Sus_scrofa___SSR3	1.14986	6.44575	14.8345	0.000639963	0.0417116	3	7	Up-regulated
Sus_scrofa___ENSSSCG00000022794	2.13492	1.29578	14.4128	0.000642038	0.0417436	3	7	Up-regulated
Sus_scrofa___ENSSSCG00000012566	0.959163	5.44907	14.8142	0.000644549	0.0418036	3	7	Up-regulated
Sus_scrofa___ERO1A	1.62497	8.87757	14.7834	0.000651248	0.0421343	3	7	Up-regulated
Sus_scrofa___KIF3A	0.958275	5.97568	14.7684	0.000654696	0.0422536	3	7	Up-regulated
Sus_scrofa___SH3BP4	1.8645	1.92195	14.6803	0.000661636	0.0424385	3	7	Up-regulated
Sus_scrofa___FAIM2	1.987	2.57389	14.6904	0.000662397	0.0424385	3	7	Up-regulated
Sus_scrofa___LTBP3	1.59286	2.62149	14.711	0.000669081	0.0427269	3	7	Up-regulated
Sus_scrofa___SH3GLB2	1.09438	3.56072	14.7016	0.000672721	0.0427269	3	7	Up-regulated
Sus_scrofa___SLCO4C1	1.77942	4.3549	14.6992	0.000673386	0.0427269	3	7	Up-regulated
Sus_scrofa___SETX	1.03595	6.31924	14.671	0.00067702	0.0427801	3	7	Up-regulated
Sus_scrofa___ENSSSCG00000044997	2.08118	1.78318	14.5267	0.000677477	0.0427801	3	7	Up-regulated
Sus_scrofa___ECM1	2.52702	0.408211	14.0698	0.000679246	0.0427834	3	7	Up-regulated
Sus_scrofa___SHCBP1L	1.31833	3.46196	14.6687	0.000680778	0.0427834	3	7	Up-regulated
Sus_scrofa___ENSSSCG00000043778	1.09151	5.30617	14.6263	0.000687634	0.043009	3	7	Up-regulated
Sus_scrofa___FAM171B	1.586	3.87325	14.5471	0.0007125	0.0443535	3	7	Up-regulated
Sus_scrofa___CSTB	1.46126	2.60551	14.5394	0.000716275	0.0444834	3	7	Up-regulated
Sus_scrofa___HCN2	1.56738	1.36781	14.2493	0.000725071	0.0449219	3	7	Up-regulated
Sus_scrofa___LAP3	0.979159	5.71094	14.465	0.000727025	0.0449219	3	7	Up-regulated
Sus_scrofa___BCL6	0.901132	5.161	14.4599	0.000728454	0.0449219	3	7	Up-regulated
Sus_scrofa___KLF7	1.18451	6.34408	14.4504	0.000730689	0.0449544	3	7	Up-regulated
Sus_scrofa___NEDD4	1.74855	3.69288	14.4242	0.000739041	0.0451518	3	7	Up-regulated
Sus_scrofa___FADS6	1.78331	0.682719	13.654	0.000741302	0.045166	3	7	Up-regulated
Sus_scrofa___DEGS2	1.61106	0.100827	13.1775	0.000742705	0.045166	3	7	Up-regulated
Sus_scrofa___ENSSSCG00000002941	2.23091	1.6041	13.9124	0.000748059	0.0452887	3	7	Up-regulated
Sus_scrofa___EDEM1	1.43335	4.5379	14.3852	0.000748493	0.0452887	3	7	Up-regulated
Sus_scrofa___RSPO2	1.4408	1.93502	14.2963	0.000761126	0.0456537	3	7	Up-regulated
Sus_scrofa___ENSSSCG00000033566	2.03964	2.19308	14.1175	0.000767334	0.0459215	3	7	Up-regulated
Sus_scrofa___ENSSSCG00000047417	3.68346	-0.0704855	13.7297	0.00077741	0.046419	3	7	Up-regulated
Sus_scrofa___LRRC57	1.12646	3.19414	14.2754	0.000781183	0.0465338	3	7	Up-regulated
Sus_scrofa___TTF2	1.25638	3.49699	14.2646	0.000782868	0.0465338	3	7	Up-regulated
Sus_scrofa___ACOT7	1.32657	1.79119	14.0916	0.000791026	0.0469128	3	7	Up-regulated
Sus_scrofa___WSB1	1.21859	8.2691	14.2073	0.000795108	0.047049	3	7	Up-regulated
Sus_scrofa___SERGEF	1.18999	5.85417	14.2008	0.000797041	0.0470576	3	7	Up-regulated
Sus_scrofa___DNAH9	1.08668	3.10135	14.2071	0.000800188	0.0471369	3	7	Up-regulated
Sus_scrofa___PODXL2	1.35408	2.5059	14.2193	0.000801965	0.0471369	3	7	Up-regulated
Sus_scrofa___HPCAL1	1.08325	4.83935	14.1507	0.00081148	0.0473148	3	7	Up-regulated
Sus_scrofa___ENSSSCG00000032422	1.51635	3.60897	14.1626	0.000812178	0.0473148	3	7	Up-regulated
Sus_scrofa___ARMC12	1.8915	2.92452	14.154	0.000817624	0.0474222	3	7	Up-regulated
Sus_scrofa___MTURN	1.94477	2.41138	14.0476	0.000829955	0.0478797	3	7	Up-regulated
Sus_scrofa___CLIP4	1.69644	1.42727	13.86	0.000830967	0.0478797	3	7	Up-regulated
Sus_scrofa___KDM3A	1.08632	7.75304	14.0615	0.000836725	0.0480557	3	7	Up-regulated
Sus_scrofa___EFS	2.27469	1.57624	13.7479	0.000837671	0.0480557	3	7	Up-regulated
Sus_scrofa___NCAPH	2.23163	1.19	13.5506	0.000839807	0.0480735	3	7	Up-regulated
Sus_scrofa___ENSSSCG00000046656	2.02764	0.279648	12.8678	0.000847009	0.0482609	3	7	Up-regulated
Sus_scrofa___LDHC	1.56306	3.75181	14.034	0.00084858	0.0482609	3	7	Up-regulated
Sus_scrofa___EPSTI1	3.15307	6.13455	14.0161	0.000852889	0.0482683	3	7	Up-regulated
Sus_scrofa___ENSSSCG00000023041	1.82301	6.28828	13.9588	0.000867722	0.0488223	3	7	Up-regulated
Sus_scrofa___C4A	1.53698	1.26349	13.6161	0.000872203	0.0489698	3	7	Up-regulated
Sus_scrofa___HTATIP2	0.983247	3.87181	13.9232	0.000880668	0.0492792	3	7	Up-regulated
Sus_scrofa___PKP1	2.20811	0.682421	13.0495	0.000881457	0.0492792	3	7	Up-regulated
Sus_scrofa___ENSSSCG00000036469	2.15808	0.963061	13.1864	0.000898699	0.0499252	3	7	Up-regulated
Sus_scrofa___DACH1	-2.02421	9.77088	38.9066	1.05054e-06	0.00153683	3	7	Down-regulated
Sus_scrofa___PDE3B	-1.57131	9.46962	36.4129	1.80016e-06	0.00182314	3	7	Down-regulated
Sus_scrofa___PPP1R3A	-1.77936	6.48796	35.3552	2.2777e-06	0.00206815	3	7	Down-regulated
Sus_scrofa___HACD1	-2.53475	7.25657	33.5141	3.4631e-06	0.00256707	3	7	Down-regulated
Sus_scrofa___RNF207	-1.82194	6.57827	33.003	3.90215e-06	0.00270398	3	7	Down-regulated
Sus_scrofa___USP28	-1.4506	7.88958	29.8396	8.32935e-06	0.00371743	3	7	Down-regulated
Sus_scrofa___ITGB1BP2	-2.09462	6.39115	29.3341	9.44432e-06	0.00407685	3	7	Down-regulated
Sus_scrofa___STRIP2	-1.52081	6.2775	28.8855	1.0566e-05	0.00437896	3	7	Down-regulated
Sus_scrofa___AGL	-1.26243	8.15241	28.7754	1.08595e-05	0.00439927	3	7	Down-regulated
Sus_scrofa___MYOCD	-1.53623	10.1464	28.6808	1.11213e-05	0.00443706	3	7	Down-regulated
Sus_scrofa___ENSSSCG00000004082	-1.25501	8.41341	28.1285	1.27929e-05	0.00461457	3	7	Down-regulated
Sus_scrofa___SIPA1L2	-1.50957	8.19785	27.6999	1.42757e-05	0.00501352	3	7	Down-regulated
Sus_scrofa___CHN1	-1.51844	7.52018	27.6713	1.43813e-05	0.00501352	3	7	Down-regulated
Sus_scrofa___KLHL31	-1.73618	6.83406	26.7748	1.81465e-05	0.00589918	3	7	Down-regulated
Sus_scrofa___ADAMTS6	-1.97542	7.75745	26.6211	1.88916e-05	0.00592207	3	7	Down-regulated
Sus_scrofa___TCTEX1D1	-2.33401	4.82269	26.5526	1.92764e-05	0.00593859	3	7	Down-regulated
Sus_scrofa___FIGN	-1.54874	6.56876	26.2126	2.10392e-05	0.00623844	3	7	Down-regulated
Sus_scrofa___SATB1	-1.0893	6.28625	25.9782	2.23878e-05	0.00655017	3	7	Down-regulated
Sus_scrofa___BMP5	-1.77737	5.50714	25.8119	2.34301e-05	0.00677979	3	7	Down-regulated
Sus_scrofa___CNKSR3	-1.42701	7.29509	25.0904	2.84012e-05	0.00787222	3	7	Down-regulated
Sus_scrofa___LGR4	-1.54948	6.74112	24.1586	3.66338e-05	0.00936546	3	7	Down-regulated
Sus_scrofa___SESN1	-1.0554	8.8885	23.2865	4.66898e-05	0.0105979	3	7	Down-regulated
Sus_scrofa___TBX20	-1.39612	7.20549	23.2734	4.68631e-05	0.0105979	3	7	Down-regulated
Sus_scrofa___KIF26B	-1.79225	10.7411	23.144	4.85984e-05	0.0107918	3	7	Down-regulated
Sus_scrofa___GRAMD1C	-1.5372	6.0312	22.8769	5.2434e-05	0.0110389	3	7	Down-regulated
Sus_scrofa___RYR2	-1.12695	13.7693	22.7185	5.48163e-05	0.0110515	3	7	Down-regulated
Sus_scrofa___MRTFB	-0.83382	8.44904	22.6681	5.56071e-05	0.0110928	3	7	Down-regulated
Sus_scrofa___STYXL2	-1.23795	6.48425	22.4846	5.85997e-05	0.0113459	3	7	Down-regulated
Sus_scrofa___GFM1	-1.21838	7.84397	22.4129	5.98085e-05	0.0113618	3	7	Down-regulated
Sus_scrofa___HIPK3	-1.03482	8.60188	22.1513	6.44702e-05	0.0117891	3	7	Down-regulated
Sus_scrofa___TBX5	-1.47295	6.88851	21.9707	6.79197e-05	0.0122497	3	7	Down-regulated
Sus_scrofa___RAMP1	-1.15952	7.86152	21.2046	8.48967e-05	0.0141487	3	7	Down-regulated
Sus_scrofa___CPNE3	-1.18128	9.13001	21.114	8.7189e-05	0.0142437	3	7	Down-regulated
Sus_scrofa___PLEKHM3	-1.30891	8.13594	21.093	8.77309e-05	0.0142437	3	7	Down-regulated
Sus_scrofa___ACTC1	-3.63549	7.12966	21.0509	8.88931e-05	0.0142437	3	7	Down-regulated
Sus_scrofa___MRPS28	-1.12503	5.83318	21.0389	8.91573e-05	0.0142437	3	7	Down-regulated
Sus_scrofa___MYOM1	-1.10076	9.86276	21.0346	8.92529e-05	0.0142437	3	7	Down-regulated
Sus_scrofa___ARHGEF6	-1.01499	8.23071	20.7858	9.60684e-05	0.0150421	3	7	Down-regulated
Sus_scrofa___GCNT2	-1.28688	8.24716	20.6343	0.00010049	0.0154744	3	7	Down-regulated
Sus_scrofa___CEP85	-1.08951	6.91243	20.4408	0.000106468	0.0162053	3	7	Down-regulated
Sus_scrofa___SMTN	-1.54035	5.7575	20.2504	0.00011288	0.016914	3	7	Down-regulated
Sus_scrofa___GRB14	-1.6803	6.55317	19.9635	0.000122933	0.0175164	3	7	Down-regulated
Sus_scrofa___ENSSSCG00000035617	-1.70069	5.95243	19.9335	0.000124082	0.0175164	3	7	Down-regulated
Sus_scrofa___MRPL33	-1.17852	5.12533	19.8893	0.000125725	0.0175164	3	7	Down-regulated
Sus_scrofa___COQ8A	-1.22798	7.86738	19.7755	0.000130076	0.0180271	3	7	Down-regulated
Sus_scrofa___PLCL2	-1.11064	8.27965	19.6461	0.000135294	0.0184757	3	7	Down-regulated
Sus_scrofa___LRRC24	-2.22603	2.80007	19.6799	0.000135417	0.0184757	3	7	Down-regulated
Sus_scrofa___BARD1	-1.08146	5.49232	19.4503	0.000143672	0.0189553	3	7	Down-regulated
Sus_scrofa___IRS1	-1.38828	6.2291	19.4221	0.00014489	0.0189673	3	7	Down-regulated
Sus_scrofa___PTPN4	-0.940872	9.25602	19.3199	0.000149473	0.0192938	3	7	Down-regulated
Sus_scrofa___ENSSSCG00000033987	-1.27738	6.3185	19.1673	0.000156668	0.0197412	3	7	Down-regulated
Sus_scrofa___DAPL1	-2.40816	4.02827	18.8531	0.000156688	0.0197412	3	7	Down-regulated
Sus_scrofa___CORIN	-2.1404	9.13831	19.1089	0.000159495	0.0198534	3	7	Down-regulated
Papio_anubis_FBXW7	-6.21819	0.672607	20.1288	0.000161524	0.0198534	3	7	Down-regulated
Sus_scrofa___KLHL23	-1.28089	5.18161	19.0534	0.00016233	0.0198534	3	7	Down-regulated
Sus_scrofa___ASXL3	-1.4044	6.41146	19.0124	0.000164334	0.0198534	3	7	Down-regulated
Sus_scrofa___KLHL41	-2.02657	6.40054	18.9491	0.000167581	0.0200579	3	7	Down-regulated
Sus_scrofa___SYNPO2	-1.36105	8.77924	18.8371	0.000173476	0.0204842	3	7	Down-regulated
Sus_scrofa___THRB	-1.06754	10.1158	18.614	0.000185945	0.021665	3	7	Down-regulated
Sus_scrofa___TMEM182	-1.24294	8.89511	18.5592	0.000189147	0.0217126	3	7	Down-regulated
Sus_scrofa___ASB11	-1.79412	4.87039	18.5307	0.000191384	0.0217221	3	7	Down-regulated
Sus_scrofa___ADAMTSL1	-1.18942	7.8365	18.3807	0.000200043	0.0223211	3	7	Down-regulated
Sus_scrofa___ASPN	-1.65247	5.22431	18.3084	0.00020477	0.0223211	3	7	Down-regulated
Sus_scrofa___MSI1	-1.66927	3.86959	18.231	0.000210498	0.0227165	3	7	Down-regulated
Sus_scrofa___EPHA7	-1.11055	6.53095	18.2001	0.000211719	0.0227551	3	7	Down-regulated
Sus_scrofa___KCNJ3	-0.998743	9.50916	18.1239	0.00021685	0.0232118	3	7	Down-regulated
Sus_scrofa___HOMER1	-0.973863	8.72044	18.0358	0.000222968	0.0235122	3	7	Down-regulated
Sus_scrofa___TNNC1	-1.33632	7.11912	18.0319	0.000223249	0.0235122	3	7	Down-regulated
Sus_scrofa___RUNX1T1	-0.84693	8.28699	18.0195	0.000224121	0.0235122	3	7	Down-regulated
Sus_scrofa___MTSS2	-1.25531	5.52546	18.0064	0.000225136	0.0235249	3	7	Down-regulated
Sus_scrofa___DRC1	-1.69705	4.21347	17.9004	0.000233633	0.0239216	3	7	Down-regulated
Sus_scrofa___TANC1	-1.0814	9.98724	17.8188	0.00023885	0.0242833	3	7	Down-regulated
Sus_scrofa___MYPN	-1.54647	8.80635	17.7794	0.000241867	0.0244017	3	7	Down-regulated
Sus_scrofa___SLC9B2	-1.25552	8.43428	17.7358	0.000245243	0.0244441	3	7	Down-regulated
Sus_scrofa___SVEP1	-1.73793	7.61604	17.6638	0.000250944	0.0246562	3	7	Down-regulated
Sus_scrofa___GABRB1	-1.39679	8.06556	17.6097	0.000255317	0.0247873	3	7	Down-regulated
Sus_scrofa___DUSP16	-1.13682	7.83501	17.5959	0.000256445	0.0247873	3	7	Down-regulated
Sus_scrofa___METAP1D	-0.812192	6.33091	17.5895	0.000256985	0.0247873	3	7	Down-regulated
Sus_scrofa___LRRC10	-2.44547	0.842806	16.7231	0.000262624	0.0248756	3	7	Down-regulated
Sus_scrofa___ENSSSCG00000049158	-1.29725	6.95254	17.4159	0.000271675	0.0252889	3	7	Down-regulated
Papio_anubis_ACTA1	-1.9102	1.77996	16.7808	0.000288453	0.0261016	3	7	Down-regulated
Sus_scrofa___ENSSSCG00000040109	-1.24233	10.2913	17.2078	0.000290489	0.0261063	3	7	Down-regulated
Sus_scrofa___OSBPL3	-0.884388	8.22393	17.1822	0.000292901	0.0262336	3	7	Down-regulated
Papio_anubis_KALRN	-3.83556	0.61236	16.2127	0.000300538	0.0268024	3	7	Down-regulated
Sus_scrofa___SEMA3C	-1.2568	8.37913	16.9087	0.000320046	0.0279055	3	7	Down-regulated
Sus_scrofa___CXADR	-1.19485	6.12479	16.8191	0.000329565	0.0285464	3	7	Down-regulated
Sus_scrofa___PPM1E	-1.01882	10.7652	16.7632	0.000335583	0.0289724	3	7	Down-regulated
Sus_scrofa___GBA2	-0.890235	5.74197	16.5835	0.000355981	0.030021	3	7	Down-regulated
Sus_scrofa___TRIB2	-1.43034	6.47913	16.5476	0.000360139	0.0301054	3	7	Down-regulated
Sus_scrofa___TRPM7	-0.73937	9.67069	16.4672	0.000369755	0.0305378	3	7	Down-regulated
Sus_scrofa___SLC8A1	-1.13108	13.295	16.4223	0.000375263	0.0305773	3	7	Down-regulated
Papio_anubis_ENSPANG00000017966	-3.51694	1.10778	15.4149	0.000379351	0.0306413	3	7	Down-regulated
Sus_scrofa___MYOZ2	-1.05384	11.0446	16.2912	0.000391848	0.0311726	3	7	Down-regulated
Sus_scrofa___QRSL1	-1.2468	5.30038	16.2039	0.000403424	0.0316211	3	7	Down-regulated
Sus_scrofa___GABRA4	-1.50473	6.16313	16.2034	0.00040349	0.0316211	3	7	Down-regulated
Sus_scrofa___SYNM	-1.23635	6.36089	16.1888	0.000405371	0.0316743	3	7	Down-regulated
Sus_scrofa___CWC27	-0.782727	7.5812	16.1455	0.000411201	0.0319403	3	7	Down-regulated
Sus_scrofa___ZNF704	-1.2551	7.52892	15.9356	0.000440926	0.033553	3	7	Down-regulated
Sus_scrofa___ENSSSCG00000037246	-7.99911	2.64376	15.9335	0.000448453	0.0337391	3	7	Down-regulated
Sus_scrofa___HOMER2	-1.2012	8.34235	15.8669	0.000451153	0.0338455	3	7	Down-regulated
Sus_scrofa___CCK	-2.16977	5.18576	15.7627	0.000467865	0.0349004	3	7	Down-regulated
Sus_scrofa___ENSSSCG00000000500	-0.870262	5.89233	15.7177	0.000474306	0.0351815	3	7	Down-regulated
Sus_scrofa___ATP2A2	-1.2241	11.1279	15.6472	0.000485596	0.0358171	3	7	Down-regulated
Papio_anubis_DACH1	-3.30767	0.450404	14.6287	0.000490213	0.0358564	3	7	Down-regulated
Sus_scrofa___ESRRG	-0.932967	9.33435	15.536	0.000504103	0.0365676	3	7	Down-regulated
Sus_scrofa___ENSSSCG00000031462	-0.911298	8.51775	15.4357	0.00052146	0.0371996	3	7	Down-regulated
Sus_scrofa___MYLK3	-1.13453	8.20434	15.399	0.000527969	0.0371996	3	7	Down-regulated
Sus_scrofa___ADAMTSL5	-1.03254	5.68616	15.3736	0.000532594	0.0371996	3	7	Down-regulated
Sus_scrofa___TRIM55	-1.2167	9.22624	15.3204	0.0005422	0.0375716	3	7	Down-regulated
Sus_scrofa___TRDMT1	-0.802644	5.68859	15.135	0.000577515	0.0394909	3	7	Down-regulated
Sus_scrofa___CCDC69	-1.8235	7.39923	15.1296	0.000578524	0.0394909	3	7	Down-regulated
Sus_scrofa___PRKAG3	-1.81498	3.97107	15.1344	0.000578895	0.0394909	3	7	Down-regulated
Sus_scrofa___SOX6	-0.926634	10.0657	15.0815	0.000588071	0.0397246	3	7	Down-regulated
Sus_scrofa___LMO7	-1.28828	9.55024	15.0725	0.000589864	0.0397246	3	7	Down-regulated
Sus_scrofa___RBPMS	-1.03769	11.1069	14.9913	0.000606452	0.0405307	3	7	Down-regulated
Sus_scrofa___GPR137C	-1.3614	7.8454	14.979	0.00060901	0.0405986	3	7	Down-regulated
Sus_scrofa___EMILIN2	-1.64606	5.66843	14.9284	0.000619855	0.0409073	3	7	Down-regulated
Sus_scrofa___FHL1	-1.85691	8.75361	14.9066	0.000624295	0.0410973	3	7	Down-regulated
Sus_scrofa___RAB20	-1.42649	5.88733	14.8516	0.000636318	0.041577	3	7	Down-regulated
Sus_scrofa___TRIP6	-1.69849	2.40535	14.7165	0.000660504	0.0424385	3	7	Down-regulated
Sus_scrofa___ENSSSCG00000021656	-1.66863	7.81389	14.6863	0.000673389	0.0427269	3	7	Down-regulated
Sus_scrofa___EPC1	-0.714489	8.56127	14.6399	0.000684247	0.042899	3	7	Down-regulated
Sus_scrofa___PRKRA	-1.17838	3.04016	14.6026	0.000696951	0.0434884	3	7	Down-regulated
Sus_scrofa___TPM1	-1.49425	9.92986	14.4393	0.000733413	0.0449906	3	7	Down-regulated
Sus_scrofa___CDH2	-0.869097	11.4247	14.4343	0.000734694	0.0449906	3	7	Down-regulated
Sus_scrofa___TRRAP	-0.688484	7.05894	14.3754	0.000749882	0.0452887	3	7	Down-regulated
Sus_scrofa___WNK2	-1.05031	8.19228	14.3651	0.000752571	0.0453471	3	7	Down-regulated
Sus_scrofa___ITGB6	-2.57556	7.91797	14.3511	0.000756264	0.0454656	3	7	Down-regulated
Sus_scrofa___SVIL	-1.05263	10.3714	14.157	0.000809207	0.0473148	3	7	Down-regulated
Sus_scrofa___CPED1	-1.14147	8.6679	14.1566	0.000809321	0.0473148	3	7	Down-regulated
Sus_scrofa___ZNF521	-1.0313	8.45715	14.1363	0.000815088	0.0473795	3	7	Down-regulated
Sus_scrofa___TXNDC16	-1.0665	7.02515	14.0962	0.000826615	0.0478383	3	7	Down-regulated
Sus_scrofa___PGM5	-1.26816	7.1905	14.0217	0.000848494	0.0482609	3	7	Down-regulated
Sus_scrofa___ENSSSCG00000039368	-0.985509	6.12437	14.003	0.000854151	0.0482683	3	7	Down-regulated
Sus_scrofa___WSCD2	-2.23871	4.78621	14.0075	0.000854208	0.0482683	3	7	Down-regulated
Sus_scrofa___ENSSSCG00000012700	-1.11686	6.49096	13.9879	0.000858649	0.0484153	3	7	Down-regulated
Sus_scrofa___EPC2	-0.690565	6.94918	13.8907	0.000888494	0.0495175	3	7	Down-regulated
Sus_scrofa___PABPN1	-0.968179	6.84682	13.8876	0.00088948	0.0495175	3	7	Down-regulated

## Sheet: vFB_ISG
Gene	logFC	logCPM	F	PValue	FDR	Observations_6month_protocol	Observations_3month_protocol	level
Sus_scrofa___ZBTB7C	3.60504	8.44088	30.5486	6.88018e-07	0.00782408	3	5	Up-regulated
Sus_scrofa___CHST9	7.11255	6.39622	29.1747	1.1617e-06	0.00782408	3	5	Up-regulated
Sus_scrofa___ROR2	3.02326	8.1947	26.7274	2.6397e-06	0.0118523	3	5	Up-regulated
Sus_scrofa___KCNMA1	3.96042	8.77429	25.4315	4.00457e-06	0.0125359	3	5	Up-regulated
Sus_scrofa___PAPPA	2.73355	9.20663	25.2624	4.65326e-06	0.0125359	3	5	Up-regulated
Sus_scrofa___PDLIM5	3.07677	7.54944	24.0317	6.85224e-06	0.0132441	3	5	Up-regulated
Sus_scrofa___ENSSSCG00000006418	4.40242	6.6036	23.7272	6.88262e-06	0.0132441	3	5	Up-regulated
Sus_scrofa___ENSSSCG00000016263	2.79369	8.1216	23.6708	8.09764e-06	0.0136344	3	5	Up-regulated
Sus_scrofa___PDE4B	2.77918	8.53176	23.1377	1.02577e-05	0.0153523	3	5	Up-regulated
Sus_scrofa___MAP1B	2.71913	7.70622	22.7285	1.16774e-05	0.0157295	3	5	Up-regulated
Sus_scrofa___GPR39	5.61353	6.56975	19.6597	3.70813e-05	0.0454078	3	5	Up-regulated
Sus_scrofa___ADAMTS3	3.87611	6.99724	19.1322	4.29422e-05	0.0482027	3	5	Up-regulated

## Sheet: Homeostatic_vFB
Gene	logFC	logCPM	F	PValue	FDR	Observations_6month_protocol	Observations_3month_protocol	level
Sus_scrofa___CA10	-3.19501	8.25377	32.7977	1.46139e-06	0.0305167	3	7	Down-regulated

## Sheet: Unassigned_Resident_immune
Gene	logFC	logCPM	F	PValue	FDR	Observations_6month_protocol	Observations_3month_protocol	level
Sus_scrofa___ENSSSCG00000029160	11.2131	9.01173	53.2269	1.70331e-10	2.82954e-06	3	6	Up-regulated
Sus_scrofa___SLC3A1	4.57341	8.72844	37.9753	2.06036e-08	0.000127751	3	6	Up-regulated
Sus_scrofa___BRD2	5.28282	8.35138	37.435	2.52091e-08	0.000127751	3	6	Up-regulated
Sus_scrofa___FAM227B	5.74123	8.22587	37.1247	3.07611e-08	0.000127751	3	6	Up-regulated
Sus_scrofa___RFC2	5.8755	8.05035	34.5852	6.97844e-08	0.000228141	3	6	Up-regulated
Sus_scrofa___ISG15	9.57285	7.92078	34.8586	8.2401e-08	0.000228141	3	6	Up-regulated
Sus_scrofa___NFKBIA	5.50475	8.30029	33.8423	1.01695e-07	0.000241336	3	6	Up-regulated
Sus_scrofa___HSPA8	5.40064	7.60536	30.0777	4.57808e-07	0.000920626	3	6	Up-regulated
Sus_scrofa___GADD45B	9.04702	7.15695	29.5887	4.98774e-07	0.000920626	3	6	Up-regulated
Sus_scrofa___GTF2IRD1	4.43169	7.65075	26.4775	1.46473e-06	0.00243321	3	6	Up-regulated
Sus_scrofa___ENSSSCG00000037274	3.9875	8.39794	26.1633	1.80064e-06	0.00268464	3	6	Up-regulated
Sus_scrofa___SERP2	8.65899	6.64144	26.136	1.9393e-06	0.00268464	3	6	Up-regulated
Sus_scrofa___GNA12	4.27477	8.22507	25.3163	2.54249e-06	0.00324891	3	6	Up-regulated
Sus_scrofa___CCL5	8.8463	6.95527	25.1564	2.8349e-06	0.00336381	3	6	Up-regulated
Sus_scrofa___DNAJB1	8.45735	6.85458	25.036	3.23993e-06	0.00340384	3	6	Up-regulated
Sus_scrofa___CACYBP	4.71817	7.79407	24.8025	3.27843e-06	0.00340384	3	6	Up-regulated
Sus_scrofa___STAT5A	4.6947	7.33063	24.3436	3.86399e-06	0.00370829	3	6	Up-regulated
Sus_scrofa___AMD1	4.18321	7.78662	24.0022	4.31341e-06	0.00377128	3	6	Up-regulated
Sus_scrofa___ARID4B	3.16161	9.32319	23.7576	5.11715e-06	0.00399743	3	6	Up-regulated
Sus_scrofa___IFIH1	8.36963	7.73693	24.0404	5.18815e-06	0.00399743	3	6	Up-regulated
Sus_scrofa___HERC5	5.64779	8.39156	23.7951	5.29397e-06	0.00399743	3	6	Up-regulated
Sus_scrofa___HSPH1	8.38609	7.23758	23.6914	5.66448e-06	0.00409123	3	6	Up-regulated
Sus_scrofa___IRS2	8.11811	7.55196	22.9587	8.03412e-06	0.00556095	3	6	Up-regulated
Sus_scrofa___LHX4	9.27997	6.82855	22.7395	9.96306e-06	0.00662025	3	6	Up-regulated
Sus_scrofa___ZNF367	8.61673	6.74383	21.5735	1.53543e-05	0.00981025	3	6	Up-regulated
Sus_scrofa___SLC31A1	8.04967	6.59575	20.8607	1.74314e-05	0.0105914	3	6	Up-regulated
Sus_scrofa___DIAPH3	8.18189	6.63343	20.6914	1.80691e-05	0.0105914	3	6	Up-regulated
Sus_scrofa___IFIT1	5.31569	7.7638	20.6387	1.8939e-05	0.0105914	3	6	Up-regulated
Sus_scrofa___HSP90AA1	3.10351	8.23239	20.4733	1.91273e-05	0.0105914	3	6	Up-regulated
Sus_scrofa___RSAD2	5.62462	7.79581	20.4953	2.02459e-05	0.0108492	3	6	Up-regulated
Sus_scrofa___RPL3L	8.67725	6.46849	20.5754	2.17626e-05	0.0112975	3	6	Up-regulated
Sus_scrofa___TOP2A	8.36854	6.58669	19.6966	3.12313e-05	0.0152592	3	6	Up-regulated
Sus_scrofa___RRM1	7.83892	6.97737	19.395	3.39499e-05	0.0161136	3	6	Up-regulated
Sus_scrofa___TCP1	7.73846	6.6913	19.1785	3.65807e-05	0.01688	3	6	Up-regulated
Sus_scrofa___HES1	7.59594	6.20919	18.6086	4.35867e-05	0.0190543	3	6	Up-regulated
Sus_scrofa___SPEN	3.02521	8.87335	18.407	4.64432e-05	0.0193008	3	6	Up-regulated
Sus_scrofa___ATAD2	4.81746	7.22794	18.5095	4.68048e-05	0.0193008	3	6	Up-regulated
Sus_scrofa___H3-5	3.32103	8.08333	18.2706	4.80512e-05	0.0193008	3	6	Up-regulated
Sus_scrofa___DHX15	4.49294	7.46159	18.4145	4.93372e-05	0.0193008	3	6	Up-regulated
Sus_scrofa___RFC1	7.43098	7.10329	18.4019	5.17224e-05	0.0193477	3	6	Up-regulated
Sus_scrofa___APOBEC2	4.43052	7.21494	18.0545	5.24106e-05	0.0193477	3	6	Up-regulated
Sus_scrofa___TRIM33	4.50338	7.96255	17.9652	5.98982e-05	0.0216311	3	6	Up-regulated
Sus_scrofa___ENSSSCG00000010525	7.42295	6.72262	17.9379	6.19778e-05	0.0219059	3	6	Up-regulated
Sus_scrofa___IFIT2	8.06939	7.09943	17.8376	6.3799e-05	0.0220798	3	6	Up-regulated
Sus_scrofa___NOCT	7.49056	6.43686	17.6456	6.85954e-05	0.0228809	3	6	Up-regulated
Sus_scrofa___ENO1	3.27512	8.177	17.4429	6.88687e-05	0.0228809	3	6	Up-regulated
Sus_scrofa___TRA2B	2.79084	8.70906	17.4379	7.22049e-05	0.0233175	3	6	Up-regulated
Sus_scrofa___USP37	3.71282	7.67957	17.3878	7.299e-05	0.0233175	3	6	Up-regulated
Sus_scrofa___SLIT2	3.08299	7.39485	17.0951	7.84169e-05	0.0245652	3	6	Up-regulated
Sus_scrofa___CSRP1	8.23329	6.19892	17.165	8.03819e-05	0.0245652	3	6	Up-regulated
Sus_scrofa___RRAD	3.68929	7.94501	17.0004	8.13318e-05	0.0245652	3	6	Up-regulated
Sus_scrofa___MXD1	7.53746	6.84227	17.0825	8.99252e-05	0.0257507	3	6	Up-regulated
Sus_scrofa___AGPAT2	7.3003	6.76123	17.0816	9.03259e-05	0.0257507	3	6	Up-regulated
Sus_scrofa___TUBB	4.61821	6.94852	16.929	9.12966e-05	0.0257507	3	6	Up-regulated
Sus_scrofa___LCORL	3.67692	8.0829	16.8758	9.14573e-05	0.0257507	3	6	Up-regulated
Sus_scrofa___SRSF2	3.51704	7.5815	16.4896	0.000105664	0.0286811	3	6	Up-regulated
Sus_scrofa___GTF2F1	7.44655	6.27437	16.5785	0.000107045	0.0286811	3	6	Up-regulated
Sus_scrofa___GLIS3	2.89693	9.5853	16.4438	0.000112114	0.0295624	3	6	Up-regulated
Sus_scrofa___LIPA	3.3074	8.03297	16.2941	0.000114726	0.0297786	3	6	Up-regulated
Sus_scrofa___HSPD1	3.68006	7.06204	16.1959	0.000121918	0.0306865	3	6	Up-regulated
Sus_scrofa___TXNIP	3.2051	8.72572	16.122	0.000123975	0.0307385	3	6	Up-regulated
Sus_scrofa___HK2	3.25574	7.52031	16.0132	0.000127014	0.0310288	3	6	Up-regulated
Sus_scrofa___HSP90AB1	4.27787	6.96443	16.0295	0.000137248	0.0330429	3	6	Up-regulated
Sus_scrofa___NCL	3.6852	7.29916	15.7719	0.000143572	0.0339783	3	6	Up-regulated
Sus_scrofa___LRRFIP2	2.67677	8.52736	15.8079	0.000146317	0.0339783	3	6	Up-regulated
Sus_scrofa___TNFAIP3	4.49454	7.2814	15.8705	0.000147269	0.0339783	3	6	Up-regulated
Sus_scrofa___TOB2	4.38825	6.86193	15.7916	0.000151886	0.0340198	3	6	Up-regulated
Sus_scrofa___CNBP	7.11117	7.02696	15.8581	0.00015472	0.0340198	3	6	Up-regulated
Sus_scrofa___PDZD8	4.21027	7.65532	15.7567	0.000156389	0.0340198	3	6	Up-regulated
Sus_scrofa___NOP58	2.65817	7.8142	15.5889	0.000158202	0.0340198	3	6	Up-regulated
Sus_scrofa___ATF4	3.76521	7.26329	15.5852	0.000161067	0.0340198	3	6	Up-regulated
Sus_scrofa___RSRP1	7.10004	7.04008	15.754	0.000161784	0.0340198	3	6	Up-regulated
Sus_scrofa___ENSSSCG00000032196	7.03677	6.65135	15.5741	0.00017327	0.0356762	3	6	Up-regulated
Sus_scrofa___ENSSSCG00000013366	3.60766	7.0291	15.3727	0.000173957	0.0356762	3	6	Up-regulated
Sus_scrofa___FTL	7.43382	7.44211	15.426	0.000182708	0.036568	3	6	Up-regulated
Sus_scrofa___PIAS1	2.6221	9.41079	15.269	0.000190695	0.0367371	3	6	Up-regulated
Sus_scrofa___PPP1R15B	7.04115	6.05055	15.2462	0.000192034	0.0367371	3	6	Up-regulated
Sus_scrofa___DNAJB13	5.12551	6.52341	15.3017	0.000192399	0.0367371	3	6	Up-regulated
Sus_scrofa___FBXL20	2.70509	8.52913	15.1107	0.000197272	0.0368326	3	6	Up-regulated
Sus_scrofa___NCAPD3	7.16548	6.27033	15.1989	0.000197333	0.0368326	3	6	Up-regulated
Sus_scrofa___FAM168B	4.12917	7.39719	15.0554	0.000213012	0.0386651	3	6	Up-regulated
Sus_scrofa___ARAP2	7.34406	6.52114	15.0102	0.000213205	0.0386651	3	6	Up-regulated
Sus_scrofa___PHF12	3.66589	7.38412	14.9604	0.000214134	0.0386651	3	6	Up-regulated
Sus_scrofa___HSPA5	3.04297	7.98571	14.7888	0.000221232	0.0388198	3	6	Up-regulated
Sus_scrofa___TFAM	6.99259	6.58094	15.01	0.000221447	0.0388198	3	6	Up-regulated
Sus_scrofa___NAF1	7.0836	6.7991	15.0126	0.000223062	0.0388198	3	6	Up-regulated
Sus_scrofa___PHC3	2.72446	8.61698	14.8146	0.000226528	0.0388198	3	6	Up-regulated
Sus_scrofa___SYCP2	3.30103	7.32949	14.7639	0.000228178	0.0388198	3	6	Up-regulated
Sus_scrofa___ESCO1	4.08073	7.76662	14.8798	0.000230857	0.0388198	3	6	Up-regulated
Sus_scrofa___EZH2	3.54486	7.00431	14.7682	0.000231349	0.0388198	3	6	Up-regulated
Sus_scrofa___SPAG16	4.35506	6.6567	14.7509	0.000236165	0.0392318	3	6	Up-regulated
Sus_scrofa___NUDC	4.43576	6.57037	14.6889	0.000239336	0.0392356	3	6	Up-regulated
Sus_scrofa___BNIP3	2.85106	7.85133	14.6689	0.000240912	0.0392356	3	6	Up-regulated
Sus_scrofa___NOP56	4.21258	6.71502	14.6004	0.0002531	0.0408203	3	6	Up-regulated
Sus_scrofa___IPO9	4.14782	7.16209	14.611	0.000259518	0.0411937	3	6	Up-regulated
Sus_scrofa___PPP1R10	3.63783	7.1237	14.506	0.000261613	0.0411937	3	6	Up-regulated
Sus_scrofa___RBM15	4.13597	6.67154	14.5505	0.000262854	0.0411937	3	6	Up-regulated
Sus_scrofa___HIVEP2	2.53442	8.9488	14.4808	0.000268143	0.0415449	3	6	Up-regulated
Sus_scrofa___GMNN	3.27766	6.81696	14.3352	0.000271771	0.0415449	3	6	Up-regulated
Sus_scrofa___WDHD1	7.3501	6.3176	14.3776	0.000285606	0.0431317	3	6	Up-regulated
Sus_scrofa___OAS2	3.5407	8.63957	14.1058	0.000308052	0.0455674	3	6	Up-regulated
Sus_scrofa___ASXL1	6.91008	7.36643	14.2882	0.000309964	0.0455674	3	6	Up-regulated
Sus_scrofa___HERC6	4.10059	9.31027	14.1194	0.000313212	0.045619	3	6	Up-regulated
Sus_scrofa___CEP83	2.97883	8.07839	14.0736	0.000315807	0.045619	3	6	Up-regulated
Sus_scrofa___XPO1	2.90058	8.07219	14.0301	0.000319124	0.0457008	3	6	Up-regulated
Sus_scrofa___NUPR1	6.99386	6.09488	14.0579	0.000331308	0.04704	3	6	Up-regulated
Sus_scrofa___CCT3	7.08066	6.60376	14.0242	0.00034478	0.0484189	3	6	Up-regulated
Sus_scrofa___HSPE1	7.60365	6.00933	13.9359	0.000346849	0.0484189	3	6	Up-regulated
Sus_scrofa___PRPF3	4.01753	7.2198	13.8954	0.000358167	0.0489721	3	6	Up-regulated
Sus_scrofa___BRIX1	4.1062	6.39263	13.82	0.000358383	0.0489721	3	6	Up-regulated
Sus_scrofa___PCMT1	3.97617	7.45841	13.8741	0.000362209	0.0489721	3	6	Up-regulated
Sus_scrofa___WDR74	6.89564	5.98529	13.8326	0.000362603	0.0489721	3	6	Up-regulated
Sus_scrofa___TBC1D32	3.1669	7.02846	13.6949	0.000372091	0.0491392	3	6	Up-regulated
Sus_scrofa___POLR1F	6.77417	6.92569	13.8693	0.000372715	0.0491392	3	6	Up-regulated
Sus_scrofa___ENSSSCG00000015313	6.851	7.09028	13.8537	0.000376201	0.0492083	3	6	Up-regulated
Sus_scrofa___HSPB1	7.19649	6.3586	13.7732	0.000381044	0.0494524	3	6	Up-regulated
Sus_scrofa___GALNT13	-4.54166	6.41141	24.2949	4.01813e-06	0.00370829	3	6	Down-regulated
Sus_scrofa___HACD1	-4.64634	6.61906	19.8163	2.53126e-05	0.0127422	3	6	Down-regulated
Sus_scrofa___ACTC1	-4.1663	6.77535	18.8358	3.88348e-05	0.0174358	3	6	Down-regulated
Sus_scrofa___CD163	-8.32395	11.5125	18.4057	4.996e-05	0.0193008	3	6	Down-regulated
Sus_scrofa___NEB	-3.94781	6.6286	16.4755	0.00010641	0.0286811	3	6	Down-regulated
Sus_scrofa___MYH6	-3.09029	7.59417	16.279	0.000117923	0.0301375	3	6	Down-regulated
Sus_scrofa___MS4A7	-6.63179	8.10114	15.7373	0.000153395	0.0340198	3	6	Down-regulated
Sus_scrofa___ENSSSCG00000040109	-3.09293	8.74086	15.4378	0.000178033	0.0360668	3	6	Down-regulated
Sus_scrofa___ENSSSCG00000015795	-4.0712	5.50907	15.257	0.000187869	0.0367371	3	6	Down-regulated
Sus_scrofa___LPL	-3.05209	7.62232	14.4572	0.000272598	0.0415449	3	6	Down-regulated
Sus_scrofa___ABLIM3	-3.87582	7.45424	14.2853	0.000290654	0.0434986	3	6	Down-regulated
Sus_scrofa___LMNTD1	-3.47966	9.48424	13.8166	0.000370052	0.0491392	3	6	Down-regulated

## Sheet: vCM1
Gene	logFC	logCPM	F	PValue	FDR	Observations_6month_protocol	Observations_3month_protocol	level
Sus_scrofa___FOXS1	6.77948	3.88758	59.5807	7.99948e-09	0.000204043	3	7	Up-regulated
Sus_scrofa___RSAD2	6.58758	4.43654	49.9021	9.48893e-08	0.000622076	3	7	Up-regulated
Sus_scrofa___MX2	8.10462	3.92498	51.602	9.66646e-08	0.000622076	3	7	Up-regulated
Sus_scrofa___ENO1	1.53375	6.33344	53.6452	9.75538e-08	0.000622076	3	7	Up-regulated
Sus_scrofa___SNAPC1	1.54237	6.66571	49.9375	1.82074e-07	0.000928835	3	7	Up-regulated
Sus_scrofa___HIF1A	1.6024	6.52324	47.6752	2.70667e-07	0.00115065	3	7	Up-regulated
Sus_scrofa___ENSSSCG00000040253	3.17687	-0.779544	33.9843	9.04319e-07	0.00278302	3	7	Up-regulated
Sus_scrofa___MCHR2	7.98628	0.569625	43.8437	9.13318e-07	0.00278302	3	7	Up-regulated
Sus_scrofa___MX1	5.60185	4.99023	39.3184	9.81972e-07	0.00278302	3	7	Up-regulated
Sus_scrofa___BST2	6.70636	2.15553	35.4572	3.22539e-06	0.00772633	3	7	Up-regulated
Sus_scrofa___MMP25	3.81046	0.440987	31.9552	3.33201e-06	0.00772633	3	7	Up-regulated
Sus_scrofa___PLEKHA4	2.9656	2.8081	33.3878	4.66281e-06	0.0099112	3	7	Up-regulated
Sus_scrofa___CSDC2	3.14525	1.02634	30.5397	6.89124e-06	0.0135211	3	7	Up-regulated
Sus_scrofa___GBX1	2.48366	1.69103	30.4663	7.52536e-06	0.0135529	3	7	Up-regulated
Sus_scrofa___MROH5	2.81023	3.78435	31.0258	7.97012e-06	0.0135529	3	7	Up-regulated
Sus_scrofa___NINJ1	1.4627	3.80713	29.9261	1.03208e-05	0.0164532	3	7	Up-regulated
Sus_scrofa___IGFBP2	3.87405	3.11408	26.2307	1.55158e-05	0.0219867	3	7	Up-regulated
Sus_scrofa___ENSSSCG00000025593	4.0192	0.480297	23.6031	1.97273e-05	0.0258326	3	7	Up-regulated
Sus_scrofa___FBXO39	1.92822	6.30475	26.9994	2.09525e-05	0.0258326	3	7	Up-regulated
Sus_scrofa___DDIT4	2.86117	2.33801	26.3345	2.12681e-05	0.0258326	3	7	Up-regulated
Sus_scrofa___PFKFB3	2.36058	3.13856	23.8874	3.73856e-05	0.0398814	3	7	Up-regulated
Sus_scrofa___HERC5	3.38622	4.37197	24.7124	3.7927e-05	0.0398814	3	7	Up-regulated
Sus_scrofa___ISG12(A)	4.99637	5.55818	23.5408	4.02343e-05	0.0398814	3	7	Up-regulated
Sus_scrofa___FRZB	3.93337	1.87198	24.2948	4.1772e-05	0.0398814	3	7	Up-regulated
Sus_scrofa___ENSSSCG00000013880	2.80072	3.23512	24.2316	4.30063e-05	0.0398814	3	7	Up-regulated
Sus_scrofa___PLOD1	1.36618	3.61629	24.2127	4.32109e-05	0.0398814	3	7	Up-regulated
Sus_scrofa___PRICKLE3	1.49211	3.10799	24.154	4.40877e-05	0.0398814	3	7	Up-regulated
Sus_scrofa___AK4	2.88911	1.7956	23.8639	4.53429e-05	0.0398814	3	7	Up-regulated
Sus_scrofa___ARHGEF39	2.15595	2.69272	23.751	4.72641e-05	0.0400959	3	7	Up-regulated
Sus_scrofa___BICDL2	2.67016	0.14145	22.1778	4.87306e-05	0.0400959	3	7	Up-regulated
Sus_scrofa___ALCAM	-1.436	8.48167	28.7319	1.36559e-05	0.0204895	3	7	Down-regulated

[truncated: 29 more sheets: DC_papio, Endocarial_lymphatic_EC, MP_LYVE1hi_papio, Prolif_lymphoids_papio, Hypoxia_EC, CD4T_naive_papio, vCM4, MP_TREM2_papio, vFB6, Neuronal_cells, vFB8, Monocytes_papio, vCM3, Unassigned_CM, Angiogenic_EC, MP_LYVE1lo_papio, NK_CD56hi_papio, Prolif_Myeloids_papio, Prolif_vCM, MP_GBE1_papio …]
