# Supplementary material for: Integrated Molecular Profiling of Preclinical and Clinical Cardiac Xenotransplants
Source: Research Square preprint supplement (doi:10.21203/rs.3.rs-8406985/v1), 2026-02-04
Supplement: Supplementary file 9 [file 4321eb4f54a3b710a878f290.xlsx]

## Sheet: Rejection
source	target	ligand	receptor	prob	pval	interaction_name	interaction_name_2	pathway_name	annotation	evidence
Endocardial/lymphatic EC	Endothelial cells (baboon)	TGFB2	TGFbR1_R2	4.64954e-06	0	TGFB2_TGFBR1_TGFBR2	TGFB2 - (TGFBR1+TGFBR2)	TGFb	Secreted Signaling	KEGG: hsa04350
Fibroblasts	Endothelial cells (baboon)	TGFB2	TGFbR1_R2	4.76257e-06	0	TGFB2_TGFBR1_TGFBR2	TGFB2 - (TGFBR1+TGFBR2)	TGFb	Secreted Signaling	KEGG: hsa04350
Endocardial/lymphatic EC	CM	BMP6	ACVR1_ACVR2A	4.33992e-05	0	BMP6_ACVR1_ACVR2A	BMP6 - (ACVR1+ACVR2A)	BMP	Secreted Signaling	KEGG: hsa04350; PMID:26893264
Fibroblasts	CM	BMP6	ACVR1_ACVR2A	4.82232e-06	0	BMP6_ACVR1_ACVR2A	BMP6 - (ACVR1+ACVR2A)	BMP	Secreted Signaling	KEGG: hsa04350; PMID:26893264
Vascular EC	CM	BMP6	ACVR1_ACVR2A	1.9289e-05	0	BMP6_ACVR1_ACVR2A	BMP6 - (ACVR1+ACVR2A)	BMP	Secreted Signaling	KEGG: hsa04350; PMID:26893264
Endocardial/lymphatic EC	Fibroblasts	BMP6	ACVR1_ACVR2A	4.33992e-05	0	BMP6_ACVR1_ACVR2A	BMP6 - (ACVR1+ACVR2A)	BMP	Secreted Signaling	KEGG: hsa04350; PMID:26893264
Fibroblasts	Fibroblasts	BMP6	ACVR1_ACVR2A	4.82232e-06	0	BMP6_ACVR1_ACVR2A	BMP6 - (ACVR1+ACVR2A)	BMP	Secreted Signaling	KEGG: hsa04350; PMID:26893264
Vascular EC	Fibroblasts	BMP6	ACVR1_ACVR2A	1.9289e-05	0	BMP6_ACVR1_ACVR2A	BMP6 - (ACVR1+ACVR2A)	BMP	Secreted Signaling	KEGG: hsa04350; PMID:26893264
Endocardial/lymphatic EC	CM	BMP6	ACVR1_BMPR2	8.67947e-05	0	BMP6_ACVR1_BMPR2	BMP6 - (ACVR1+BMPR2)	BMP	Secreted Signaling	KEGG: hsa04350; PMID:26893264
Fibroblasts	CM	BMP6	ACVR1_BMPR2	9.6446e-06	0	BMP6_ACVR1_BMPR2	BMP6 - (ACVR1+BMPR2)	BMP	Secreted Signaling	KEGG: hsa04350; PMID:26893264
Vascular EC	CM	BMP6	ACVR1_BMPR2	3.85773e-05	0	BMP6_ACVR1_BMPR2	BMP6 - (ACVR1+BMPR2)	BMP	Secreted Signaling	KEGG: hsa04350; PMID:26893264
Endocardial/lymphatic EC	Fibroblasts	BMP6	ACVR1_BMPR2	8.67947e-05	0	BMP6_ACVR1_BMPR2	BMP6 - (ACVR1+BMPR2)	BMP	Secreted Signaling	KEGG: hsa04350; PMID:26893264
Fibroblasts	Fibroblasts	BMP6	ACVR1_BMPR2	9.6446e-06	0	BMP6_ACVR1_BMPR2	BMP6 - (ACVR1+BMPR2)	BMP	Secreted Signaling	KEGG: hsa04350; PMID:26893264
Vascular EC	Fibroblasts	BMP6	ACVR1_BMPR2	3.85773e-05	0	BMP6_ACVR1_BMPR2	BMP6 - (ACVR1+BMPR2)	BMP	Secreted Signaling	KEGG: hsa04350; PMID:26893264
Endocardial/lymphatic EC	Neuronal cells	BMP6	ACVR1_BMPR2	4.33992e-05	0	BMP6_ACVR1_BMPR2	BMP6 - (ACVR1+BMPR2)	BMP	Secreted Signaling	KEGG: hsa04350; PMID:26893264
Fibroblasts	Neuronal cells	BMP6	ACVR1_BMPR2	4.82232e-06	0	BMP6_ACVR1_BMPR2	BMP6 - (ACVR1+BMPR2)	BMP	Secreted Signaling	KEGG: hsa04350; PMID:26893264
Vascular EC	Neuronal cells	BMP6	ACVR1_BMPR2	1.9289e-05	0	BMP6_ACVR1_BMPR2	BMP6 - (ACVR1+BMPR2)	BMP	Secreted Signaling	KEGG: hsa04350; PMID:26893264
Endocardial/lymphatic EC	CM	BMP6	BMPR1A_ACVR2A	8.67947e-05	0	BMP6_BMPR1A_ACVR2A	BMP6 - (BMPR1A+ACVR2A)	BMP	Secreted Signaling	KEGG: hsa04350; PMID:26893264
Fibroblasts	CM	BMP6	BMPR1A_ACVR2A	9.6446e-06	0	BMP6_BMPR1A_ACVR2A	BMP6 - (BMPR1A+ACVR2A)	BMP	Secreted Signaling	KEGG: hsa04350; PMID:26893264
Vascular EC	CM	BMP6	BMPR1A_ACVR2A	3.85773e-05	0	BMP6_BMPR1A_ACVR2A	BMP6 - (BMPR1A+ACVR2A)	BMP	Secreted Signaling	KEGG: hsa04350; PMID:26893264
Endocardial/lymphatic EC	Fibroblasts	BMP6	BMPR1A_ACVR2A	7.51673e-05	0	BMP6_BMPR1A_ACVR2A	BMP6 - (BMPR1A+ACVR2A)	BMP	Secreted Signaling	KEGG: hsa04350; PMID:26893264
Fibroblasts	Fibroblasts	BMP6	BMPR1A_ACVR2A	8.35248e-06	0	BMP6_BMPR1A_ACVR2A	BMP6 - (BMPR1A+ACVR2A)	BMP	Secreted Signaling	KEGG: hsa04350; PMID:26893264
Vascular EC	Fibroblasts	BMP6	BMPR1A_ACVR2A	3.34091e-05	0	BMP6_BMPR1A_ACVR2A	BMP6 - (BMPR1A+ACVR2A)	BMP	Secreted Signaling	KEGG: hsa04350; PMID:26893264
Endocardial/lymphatic EC	CM	BMP6	BMPR1A_BMPR2	0.000173574	0	BMP6_BMPR1A_BMPR2	BMP6 - (BMPR1A+BMPR2)	BMP	Secreted Signaling	KEGG: hsa04350; PMID:26893264
Fibroblasts	CM	BMP6	BMPR1A_BMPR2	1.9289e-05	0	BMP6_BMPR1A_BMPR2	BMP6 - (BMPR1A+BMPR2)	BMP	Secreted Signaling	KEGG: hsa04350; PMID:26893264
Vascular EC	CM	BMP6	BMPR1A_BMPR2	7.71516e-05	0	BMP6_BMPR1A_BMPR2	BMP6 - (BMPR1A+BMPR2)	BMP	Secreted Signaling	KEGG: hsa04350; PMID:26893264
Endocardial/lymphatic EC	Fibroblasts	BMP6	BMPR1A_BMPR2	0.000150323	0	BMP6_BMPR1A_BMPR2	BMP6 - (BMPR1A+BMPR2)	BMP	Secreted Signaling	KEGG: hsa04350; PMID:26893264
Fibroblasts	Fibroblasts	BMP6	BMPR1A_BMPR2	1.67048e-05	0	BMP6_BMPR1A_BMPR2	BMP6 - (BMPR1A+BMPR2)	BMP	Secreted Signaling	KEGG: hsa04350; PMID:26893264
Vascular EC	Fibroblasts	BMP6	BMPR1A_BMPR2	6.68159e-05	0	BMP6_BMPR1A_BMPR2	BMP6 - (BMPR1A+BMPR2)	BMP	Secreted Signaling	KEGG: hsa04350; PMID:26893264
Endocardial/lymphatic EC	Mural cells	BMP6	BMPR1A_BMPR2	4.33992e-05	0	BMP6_BMPR1A_BMPR2	BMP6 - (BMPR1A+BMPR2)	BMP	Secreted Signaling	KEGG: hsa04350; PMID:26893264
Fibroblasts	Mural cells	BMP6	BMPR1A_BMPR2	4.82232e-06	0	BMP6_BMPR1A_BMPR2	BMP6 - (BMPR1A+BMPR2)	BMP	Secreted Signaling	KEGG: hsa04350; PMID:26893264
Vascular EC	Mural cells	BMP6	BMPR1A_BMPR2	1.9289e-05	0	BMP6_BMPR1A_BMPR2	BMP6 - (BMPR1A+BMPR2)	BMP	Secreted Signaling	KEGG: hsa04350; PMID:26893264
Endocardial/lymphatic EC	Neuronal cells	BMP6	BMPR1A_BMPR2	4.33992e-05	0	BMP6_BMPR1A_BMPR2	BMP6 - (BMPR1A+BMPR2)	BMP	Secreted Signaling	KEGG: hsa04350; PMID:26893264
Fibroblasts	Neuronal cells	BMP6	BMPR1A_BMPR2	4.82232e-06	0	BMP6_BMPR1A_BMPR2	BMP6 - (BMPR1A+BMPR2)	BMP	Secreted Signaling	KEGG: hsa04350; PMID:26893264
Vascular EC	Neuronal cells	BMP6	BMPR1A_BMPR2	1.9289e-05	0	BMP6_BMPR1A_BMPR2	BMP6 - (BMPR1A+BMPR2)	BMP	Secreted Signaling	KEGG: hsa04350; PMID:26893264
Mast cells (baboon)	CM	NRG1	ERBB4	0.000409731	0	NRG1_ERBB4	NRG1 - ERBB4	NRG	Secreted Signaling	KEGG: hsa04012
CM	CM	FGF1	FGFR1	2.41111e-05	0	FGF1_FGFR1	FGF1 - FGFR1	FGF	Secreted Signaling	PMC: 4393358
CM	Fibroblasts	FGF1	FGFR1	4.82232e-06	0	FGF1_FGFR1	FGF1 - FGFR1	FGF	Secreted Signaling	PMC: 4393358
CM	Fibroblasts	FGF1	FGFR2	4.82232e-06	0	FGF1_FGFR2	FGF1 - FGFR2	FGF	Secreted Signaling	PMC: 4393358
Fibroblasts	CM	FGF2	FGFR1	2.41111e-05	0	FGF2_FGFR1	FGF2 - FGFR1	FGF	Secreted Signaling	PMC: 4393358
Neuronal cells	CM	FGF2	FGFR1	2.41111e-05	0	FGF2_FGFR1	FGF2 - FGFR1	FGF	Secreted Signaling	PMC: 4393358
Vascular EC	CM	FGF2	FGFR1	2.41111e-05	0	FGF2_FGFR1	FGF2 - FGFR1	FGF	Secreted Signaling	PMC: 4393358
Fibroblasts	Fibroblasts	FGF2	FGFR1	4.82232e-06	0	FGF2_FGFR1	FGF2 - FGFR1	FGF	Secreted Signaling	PMC: 4393358
Neuronal cells	Fibroblasts	FGF2	FGFR1	4.82232e-06	0	FGF2_FGFR1	FGF2 - FGFR1	FGF	Secreted Signaling	PMC: 4393358
Vascular EC	Fibroblasts	FGF2	FGFR1	4.82232e-06	0	FGF2_FGFR1	FGF2 - FGFR1	FGF	Secreted Signaling	PMC: 4393358
Fibroblasts	Fibroblasts	FGF2	FGFR2	4.82232e-06	0	FGF2_FGFR2	FGF2 - FGFR2	FGF	Secreted Signaling	PMC: 4393358
Neuronal cells	Fibroblasts	FGF2	FGFR2	4.82232e-06	0	FGF2_FGFR2	FGF2 - FGFR2	FGF	Secreted Signaling	PMC: 4393358
Vascular EC	Fibroblasts	FGF2	FGFR2	4.82232e-06	0	FGF2_FGFR2	FGF2 - FGFR2	FGF	Secreted Signaling	PMC: 4393358
Vascular EC	Fibroblasts	PDGFB	PDGFRA	2.40365e-05	0	PDGFB_PDGFRA	PDGFB - PDGFRA	PDGF	Secreted Signaling	PMID: 15207812
Vascular EC	Mural cells	PDGFB	PDGFRB	1.9289e-05	0	PDGFB_PDGFRB	PDGFB - PDGFRB	PDGF	Secreted Signaling	PMID: 15207812
CM	Fibroblasts	PDGFC	PDGFRA	4.80718e-05	0	PDGFC_PDGFRA	PDGFC - PDGFRA	PDGF	Secreted Signaling	PMID: 15207812
Resident Immune	Fibroblasts	PDGFC	PDGFRA	9.6139e-05	0	PDGFC_PDGFRA	PDGFC - PDGFRA	PDGF	Secreted Signaling	PMID: 15207812
CM	Mural cells	PDGFD	PDGFRB	1.9289e-05	0	PDGFD_PDGFRB	PDGFD - PDGFRB	PDGF	Secreted Signaling	PMID: 15207812
Endocardial/lymphatic EC	Mural cells	PDGFD	PDGFRB	3.85773e-05	0	PDGFD_PDGFRB	PDGFD - PDGFRB	PDGF	Secreted Signaling	PMID: 15207812
Fibroblasts	Mural cells	PDGFD	PDGFRB	0.00019226	0	PDGFD_PDGFRB	PDGFD - PDGFRB	PDGF	Secreted Signaling	PMID: 15207812
Neuronal cells	Mural cells	PDGFD	PDGFRB	8.67947e-05	0	PDGFD_PDGFRB	PDGFD - PDGFRB	PDGF	Secreted Signaling	PMID: 15207812
Vascular EC	Mural cells	PDGFD	PDGFRB	0.000289257	0	PDGFD_PDGFRB	PDGFD - PDGFRB	PDGF	Secreted Signaling	PMID: 15207812
CM	Endothelial cells (baboon)	VEGFA	FLT1	2.41117e-06	0.01	VEGFA_VEGFR1	VEGFA - VEGFR1	VEGF	Secreted Signaling	KEGG: hsa04370; PMID: 16633338
CM	Vascular EC	VEGFA	FLT1	3.85773e-05	0	VEGFA_VEGFR1	VEGFA - VEGFR1	VEGF	Secreted Signaling	KEGG: hsa04370; PMID: 16633338
CM	Endocardial/lymphatic EC	VEGFA	KDR	4.88223e-06	0	VEGFA_VEGFR2	VEGFA - VEGFR2	VEGF	Secreted Signaling	KEGG: hsa04370; PMID: 16633338
CM	Vascular EC	VEGFA	KDR	9.82505e-06	0	VEGFA_VEGFR2	VEGFA - VEGFR2	VEGF	Secreted Signaling	KEGG: hsa04370; PMID: 16633338
Vascular EC	Endocardial/lymphatic EC	VEGFC	FLT4	1.9289e-05	0	VEGFC_VEGFR3	VEGFC - VEGFR3	VEGF	Secreted Signaling	KEGG: hsa04370; PMID: 16633338
Vascular EC	Endocardial/lymphatic EC	VEGFC	KDR	4.88223e-06	0	VEGFC_VEGFR2	VEGFC - VEGFR2	VEGF	Secreted Signaling	KEGG: hsa04370; PMID: 16633338
Vascular EC	Vascular EC	VEGFC	KDR	9.82505e-06	0	VEGFC_VEGFR2	VEGFC - VEGFR2	VEGF	Secreted Signaling	KEGG: hsa04370; PMID: 16633338
CM	Vascular EC	VEGFA	FLT1_KDR	1.96499e-05	0	VEGFA_VEGFR1R2	VEGFA - VEGFR1R2	VEGF	Secreted Signaling	PMID: 16633338
Vascular EC	Endocardial/lymphatic EC	VEGFC	FLT4_KDR	9.7644e-06	0	VEGFC_VEGFR2R3	VEGFC - VEGFR2R3	VEGF	Secreted Signaling	PMID: 16633338
Fibroblasts	CM	IGF1	IGF1R	0.000504523	0	IGF1_IGF1R	IGF1 - IGF1R	IGF	Secreted Signaling	PMID: 14604834
Fibroblasts	Endocardial/lymphatic EC	IGF1	IGF1R	0.000114651	0	IGF1_IGF1R	IGF1 - IGF1R	IGF	Secreted Signaling	PMID: 14604834
Fibroblasts	Endothelial cells (baboon)	IGF1	IGF1R	1.4422e-05	0	IGF1_IGF1R	IGF1 - IGF1R	IGF	Secreted Signaling	PMID: 14604834
Fibroblasts	Fibroblasts	IGF1	IGF1R	5.7507e-05	0	IGF1_IGF1R	IGF1 - IGF1R	IGF	Secreted Signaling	PMID: 14604834
Fibroblasts	Mural cells	IGF1	IGF1R	1.4422e-05	0	IGF1_IGF1R	IGF1 - IGF1R	IGF	Secreted Signaling	PMID: 14604834
Fibroblasts	Neuronal cells	IGF1	IGF1R	2.16329e-05	0	IGF1_IGF1R	IGF1 - IGF1R	IGF	Secreted Signaling	PMID: 14604834
Fibroblasts	Resident Immune	IGF1	IGF1R	1.4422e-05	0	IGF1_IGF1R	IGF1 - IGF1R	IGF	Secreted Signaling	PMID: 14604834
Fibroblasts	Vascular EC	IGF1	IGF1R	2.88437e-05	0	IGF1_IGF1R	IGF1 - IGF1R	IGF	Secreted Signaling	PMID: 14604834
Fibroblasts	Endocardial/lymphatic EC	CCL2	ACKR2	4.82232e-06	0	CCL2_ACKR2	CCL2 - ACKR2	CCL	Secreted Signaling	PMID: 26740381
Fibroblasts	Fibroblasts	CCL2	ACKR2	4.82232e-06	0	CCL2_ACKR2	CCL2 - ACKR2	CCL	Secreted Signaling	PMID: 26740381
Resident Immune	Endocardial/lymphatic EC	CCL14	ACKR2	4.82232e-06	0	CCL14_ACKR2	CCL14 - ACKR2	CCL	Secreted Signaling	PMID: 26740381
Resident Immune	Fibroblasts	CCL14	ACKR2	4.82232e-06	0	CCL14_ACKR2	CCL14 - ACKR2	CCL	Secreted Signaling	PMID: 26740381
CM	Endothelial cells (baboon)	IL34	CSF1R	2.41117e-06	0	IL34_CSF1R	IL34 - CSF1R	CSF	Secreted Signaling	KEGG: hsa04060
Neuronal cells	Endothelial cells (baboon)	IL34	CSF1R	2.41117e-06	0	IL34_CSF1R	IL34 - CSF1R	CSF	Secreted Signaling	KEGG: hsa04060
CM	Myeloids (baboon)	IL34	CSF1R	4.82232e-06	0	IL34_CSF1R	IL34 - CSF1R	CSF	Secreted Signaling	KEGG: hsa04060
Neuronal cells	Myeloids (baboon)	IL34	CSF1R	4.82232e-06	0	IL34_CSF1R	IL34 - CSF1R	CSF	Secreted Signaling	KEGG: hsa04060
CM	Resident Immune	IL34	CSF1R	1.9289e-05	0	IL34_CSF1R	IL34 - CSF1R	CSF	Secreted Signaling	KEGG: hsa04060
Neuronal cells	Resident Immune	IL34	CSF1R	1.9289e-05	0	IL34_CSF1R	IL34 - CSF1R	CSF	Secreted Signaling	KEGG: hsa04060
CM	CM	NAMPT	INSR	4.33992e-05	0	NAMPT_INSR	NAMPT - INSR	VISFATIN	Secreted Signaling	PMID: 28490838
CM	Endothelial cells (baboon)	NAMPT	INSR	2.41117e-06	0	NAMPT_INSR	NAMPT - INSR	VISFATIN	Secreted Signaling	PMID: 28490838
CM	CM	NAMPT	ITGA5_ITGB1	4.82232e-06	0	NAMPT_ITGA5_ITGB1	NAMPT - (ITGA5+ITGB1)	VISFATIN	Secreted Signaling	PMID: 28490838
CM	Endocardial/lymphatic EC	NAMPT	ITGA5_ITGB1	9.6446e-06	0	NAMPT_ITGA5_ITGB1	NAMPT - (ITGA5+ITGB1)	VISFATIN	Secreted Signaling	PMID: 28490838
Endothelial cells (baboon)	Endocardial/lymphatic EC	NAMPT	ITGA5_ITGB1	4.82232e-06	0.02	NAMPT_ITGA5_ITGB1	NAMPT - (ITGA5+ITGB1)	VISFATIN	Secreted Signaling	PMID: 28490838
Endocardial/lymphatic EC	Endocardial/lymphatic EC	ANGPT2	TEK	9.6446e-06	0	ANGPT2_TEK	ANGPT2 - TEK	ANGPT	Secreted Signaling	PMID: 20651738
Endothelial cells (baboon)	Endocardial/lymphatic EC	ANGPT2	TEK	4.82232e-06	0	ANGPT2_TEK	ANGPT2 - TEK	ANGPT	Secreted Signaling	PMID: 20651738
Vascular EC	Endocardial/lymphatic EC	ANGPT2	TEK	4.82232e-06	0	ANGPT2_TEK	ANGPT2 - TEK	ANGPT	Secreted Signaling	PMID: 20651738
Endocardial/lymphatic EC	Vascular EC	ANGPT2	TEK	9.6446e-06	0	ANGPT2_TEK	ANGPT2 - TEK	ANGPT	Secreted Signaling	PMID: 20651738
Endothelial cells (baboon)	Vascular EC	ANGPT2	TEK	4.82232e-06	0	ANGPT2_TEK	ANGPT2 - TEK	ANGPT	Secreted Signaling	PMID: 20651738
Vascular EC	Vascular EC	ANGPT2	TEK	4.82232e-06	0	ANGPT2_TEK	ANGPT2 - TEK	ANGPT	Secreted Signaling	PMID: 20651738
Endocardial/lymphatic EC	CM	ANGPT2	ITGA5_ITGB1	9.6446e-06	0	ANGPT2_ITGA5_ITGB1	ANGPT2 - (ITGA5+ITGB1)	ANGPT	Secreted Signaling	PMID: 20651738; PMID: 25635707
Endothelial cells (baboon)	CM	ANGPT2	ITGA5_ITGB1	4.82232e-06	0	ANGPT2_ITGA5_ITGB1	ANGPT2 - (ITGA5+ITGB1)	ANGPT	Secreted Signaling	PMID: 20651738; PMID: 25635707
Vascular EC	CM	ANGPT2	ITGA5_ITGB1	4.82232e-06	0	ANGPT2_ITGA5_ITGB1	ANGPT2 - (ITGA5+ITGB1)	ANGPT	Secreted Signaling	PMID: 20651738; PMID: 25635707
Endocardial/lymphatic EC	Endocardial/lymphatic EC	ANGPT2	ITGA5_ITGB1	1.91699e-05	0	ANGPT2_ITGA5_ITGB1	ANGPT2 - (ITGA5+ITGB1)	ANGPT	Secreted Signaling	PMID: 20651738; PMID: 25635707
Endothelial cells (baboon)	Endocardial/lymphatic EC	ANGPT2	ITGA5_ITGB1	9.58506e-06	0	ANGPT2_ITGA5_ITGB1	ANGPT2 - (ITGA5+ITGB1)	ANGPT	Secreted Signaling	PMID: 20651738; PMID: 25635707
Vascular EC	Endocardial/lymphatic EC	ANGPT2	ITGA5_ITGB1	9.58506e-06	0	ANGPT2_ITGA5_ITGB1	ANGPT2 - (ITGA5+ITGB1)	ANGPT	Secreted Signaling	PMID: 20651738; PMID: 25635707
Vascular EC	Endocardial/lymphatic EC	GHRL	GHSR	4.82232e-06	0	GHRL_GHSR	GHRL - GHSR	GHRELIN	Secreted Signaling	KEGG: hsa04080; PMID: 29233536
Vascular EC	Fibroblasts	GHRL	GHSR	4.82232e-06	0	GHRL_GHSR	GHRL - GHSR	GHRELIN	Secreted Signaling	KEGG: hsa04080; PMID: 29233536
Vascular EC	Resident Immune	GHRL	GHSR	1.9289e-05	0	GHRL_GHSR	GHRL - GHSR	GHRELIN	Secreted Signaling	KEGG: hsa04080; PMID: 29233536
Fibroblasts	Endocardial/lymphatic EC	KITLG	KIT	9.6446e-06	0	KITL_KIT	KITL - KIT	KIT	Secreted Signaling	KEGG: hsa04080
Vascular EC	Endocardial/lymphatic EC	KITLG	KIT	1.9289e-05	0	KITL_KIT	KITL - KIT	KIT	Secreted Signaling	KEGG: hsa04080
Fibroblasts	Mast cells (baboon)	KITLG	KIT	1.9289e-05	0	KITL_KIT	KITL - KIT	KIT	Secreted Signaling	KEGG: hsa04080
Vascular EC	Mast cells (baboon)	KITLG	KIT	3.85773e-05	0	KITL_KIT	KITL - KIT	KIT	Secreted Signaling	KEGG: hsa04080
Fibroblasts	Vascular EC	KITLG	KIT	2.41111e-05	0	KITL_KIT	KITL - KIT	KIT	Secreted Signaling	KEGG: hsa04080
Vascular EC	Vascular EC	KITLG	KIT	4.82211e-05	0	KITL_KIT	KITL - KIT	KIT	Secreted Signaling	KEGG: hsa04080
Endocardial/lymphatic EC	CM	SEMA3A	NRP1_PLXNA2	5.3043e-05	0	SEMA3A_NRP1_PLXNA2	SEMA3A - (NRP1+PLXNA2)	SEMA3	Secreted Signaling	PMID: 27533782
Endocardial/lymphatic EC	Vascular EC	SEMA3A	NRP1_PLXNA2	0.000299982	0	SEMA3A_NRP1_PLXNA2	SEMA3A - (NRP1+PLXNA2)	SEMA3	Secreted Signaling	PMID: 27533782
Endocardial/lymphatic EC	CM	SEMA3A	NRP1_PLXNA4	5.3043e-05	0	SEMA3A_NRP1_PLXNA4	SEMA3A - (NRP1+PLXNA4)	SEMA3	Secreted Signaling	PMID: 27533782
Endocardial/lymphatic EC	Fibroblasts	SEMA3A	NRP1_PLXNA4	0.000140326	0	SEMA3A_NRP1_PLXNA4	SEMA3A - (NRP1+PLXNA4)	SEMA3	Secreted Signaling	PMID: 27533782
CM	CM	SEMA3C	NRP1_PLXNA2	1.9289e-05	0	SEMA3C_NRP1_PLXNA2	SEMA3C - (NRP1+PLXNA2)	SEMA3	Secreted Signaling	PMID: 27533782
Fibroblasts	CM	SEMA3C	NRP1_PLXNA2	4.82232e-06	0	SEMA3C_NRP1_PLXNA2	SEMA3C - (NRP1+PLXNA2)	SEMA3	Secreted Signaling	PMID: 27533782
Neuronal cells	CM	SEMA3C	NRP1_PLXNA2	4.82232e-06	0	SEMA3C_NRP1_PLXNA2	SEMA3C - (NRP1+PLXNA2)	SEMA3	Secreted Signaling	PMID: 27533782
CM	Vascular EC	SEMA3C	NRP1_PLXNA2	0.000109105	0	SEMA3C_NRP1_PLXNA2	SEMA3C - (NRP1+PLXNA2)	SEMA3	Secreted Signaling	PMID: 27533782
Fibroblasts	Vascular EC	SEMA3C	NRP1_PLXNA2	2.72786e-05	0	SEMA3C_NRP1_PLXNA2	SEMA3C - (NRP1+PLXNA2)	SEMA3	Secreted Signaling	PMID: 27533782
Neuronal cells	Vascular EC	SEMA3C	NRP1_PLXNA2	2.72786e-05	0	SEMA3C_NRP1_PLXNA2	SEMA3C - (NRP1+PLXNA2)	SEMA3	Secreted Signaling	PMID: 27533782
CM	CM	SEMA3C	NRP1_PLXNA4	1.9289e-05	0	SEMA3C_NRP1_PLXNA4	SEMA3C - (NRP1+PLXNA4)	SEMA3	Secreted Signaling	PMID: 27533782
Fibroblasts	CM	SEMA3C	NRP1_PLXNA4	4.82232e-06	0	SEMA3C_NRP1_PLXNA4	SEMA3C - (NRP1+PLXNA4)	SEMA3	Secreted Signaling	PMID: 27533782
CM	Fibroblasts	SEMA3C	NRP1_PLXNA4	5.10323e-05	0	SEMA3C_NRP1_PLXNA4	SEMA3C - (NRP1+PLXNA4)	SEMA3	Secreted Signaling	PMID: 27533782
Fibroblasts	Fibroblasts	SEMA3C	NRP1_PLXNA4	1.27586e-05	0	SEMA3C_NRP1_PLXNA4	SEMA3C - (NRP1+PLXNA4)	SEMA3	Secreted Signaling	PMID: 27533782
Neuronal cells	Fibroblasts	SEMA3C	NRP1_PLXNA4	1.27586e-05	0.02	SEMA3C_NRP1_PLXNA4	SEMA3C - (NRP1+PLXNA4)	SEMA3	Secreted Signaling	PMID: 27533782
Endocardial/lymphatic EC	CM	SEMA3D	NRP1_PLXNA2	1.9289e-05	0	SEMA3D_NRP1_PLXNA2	SEMA3D - (NRP1+PLXNA2)	SEMA3	Secreted Signaling	PMID: 27533782
Endocardial/lymphatic EC	Vascular EC	SEMA3D	NRP1_PLXNA2	0.000109105	0	SEMA3D_NRP1_PLXNA2	SEMA3D - (NRP1+PLXNA2)	SEMA3	Secreted Signaling	PMID: 27533782
Endocardial/lymphatic EC	CM	SEMA3D	NRP1_PLXNA4	1.9289e-05	0	SEMA3D_NRP1_PLXNA4	SEMA3D - (NRP1+PLXNA4)	SEMA3	Secreted Signaling	PMID: 27533782
Endocardial/lymphatic EC	Fibroblasts	SEMA3D	NRP1_PLXNA4	5.10323e-05	0	SEMA3D_NRP1_PLXNA4	SEMA3D - (NRP1+PLXNA4)	SEMA3	Secreted Signaling	PMID: 27533782
CM	Endocardial/lymphatic EC	SEMA3C	NRP2_PLXNA2	5.45556e-05	0	SEMA3C_NRP2_PLXNA2	SEMA3C - (NRP2+PLXNA2)	SEMA3	Secreted Signaling	PMID: 27533782
Fibroblasts	Endocardial/lymphatic EC	SEMA3C	NRP2_PLXNA2	1.36395e-05	0	SEMA3C_NRP2_PLXNA2	SEMA3C - (NRP2+PLXNA2)	SEMA3	Secreted Signaling	PMID: 27533782
Neuronal cells	Endocardial/lymphatic EC	SEMA3C	NRP2_PLXNA2	1.36395e-05	0	SEMA3C_NRP2_PLXNA2	SEMA3C - (NRP2+PLXNA2)	SEMA3	Secreted Signaling	PMID: 27533782
CM	Vascular EC	SEMA3C	NRP2_PLXNA2	7.71516e-05	0	SEMA3C_NRP2_PLXNA2	SEMA3C - (NRP2+PLXNA2)	SEMA3	Secreted Signaling	PMID: 27533782
Fibroblasts	Vascular EC	SEMA3C	NRP2_PLXNA2	1.9289e-05	0	SEMA3C_NRP2_PLXNA2	SEMA3C - (NRP2+PLXNA2)	SEMA3	Secreted Signaling	PMID: 27533782
Neuronal cells	Vascular EC	SEMA3C	NRP2_PLXNA2	1.9289e-05	0	SEMA3C_NRP2_PLXNA2	SEMA3C - (NRP2+PLXNA2)	SEMA3	Secreted Signaling	PMID: 27533782
CM	Endocardial/lymphatic EC	SEMA3C	NRP2_PLXNA4	5.45556e-05	0	SEMA3C_NRP2_PLXNA4	SEMA3C - (NRP2+PLXNA4)	SEMA3	Secreted Signaling	PMID: 27533782
Fibroblasts	Endocardial/lymphatic EC	SEMA3C	NRP2_PLXNA4	1.36395e-05	0	SEMA3C_NRP2_PLXNA4	SEMA3C - (NRP2+PLXNA4)	SEMA3	Secreted Signaling	PMID: 27533782
Neuronal cells	Endocardial/lymphatic EC	SEMA3C	NRP2_PLXNA4	1.36395e-05	0	SEMA3C_NRP2_PLXNA4	SEMA3C - (NRP2+PLXNA4)	SEMA3	Secreted Signaling	PMID: 27533782
Endocardial/lymphatic EC	Endocardial/lymphatic EC	SEMA3D	NRP2_PLXNA2	5.45556e-05	0	SEMA3D_NRP2_PLXNA2	SEMA3D - (NRP2+PLXNA2)	SEMA3	Secreted Signaling	PMID: 27533782
Endocardial/lymphatic EC	Vascular EC	SEMA3D	NRP2_PLXNA2	7.71516e-05	0	SEMA3D_NRP2_PLXNA2	SEMA3D - (NRP2+PLXNA2)	SEMA3	Secreted Signaling	PMID: 27533782
Endocardial/lymphatic EC	Endocardial/lymphatic EC	SEMA3D	NRP2_PLXNA4	5.45556e-05	0	SEMA3D_NRP2_PLXNA4	SEMA3D - (NRP2+PLXNA4)	SEMA3	Secreted Signaling	PMID: 27533782
CM	Resident Immune	PROS1	AXL	4.82232e-06	0	PROS1_AXL	PROS1 - AXL	PROS	Secreted Signaling	PMID: 29531161
Fibroblasts	Endocardial/lymphatic EC	COL1A1	ITGA1_ITGB1	8.62573e-05	0	COL1A1_ITGA1_ITGB1	COL1A1 - (ITGA1+ITGB1)	COLLAGEN	ECM-Receptor	KEGG: hsa04512
Fibroblasts	Mural cells	COL1A1	ITGA1_ITGB1	5.45556e-05	0	COL1A1_ITGA1_ITGB1	COL1A1 - (ITGA1+ITGB1)	COLLAGEN	ECM-Receptor	KEGG: hsa04512
Fibroblasts	Neuronal cells	COL1A1	ITGA1_ITGB1	2.72786e-05	0	COL1A1_ITGA1_ITGB1	COL1A1 - (ITGA1+ITGB1)	COLLAGEN	ECM-Receptor	KEGG: hsa04512
Fibroblasts	Vascular EC	COL1A1	ITGA1_ITGB1	4.31305e-05	0	COL1A1_ITGA1_ITGB1	COL1A1 - (ITGA1+ITGB1)	COLLAGEN	ECM-Receptor	KEGG: hsa04512
Fibroblasts	Endocardial/lymphatic EC	COL1A2	ITGA1_ITGB1	0.000107819	0	COL1A2_ITGA1_ITGB1	COL1A2 - (ITGA1+ITGB1)	COLLAGEN	ECM-Receptor	KEGG: hsa04512
Mural cells	Endocardial/lymphatic EC	COL1A2	ITGA1_ITGB1	2.15657e-05	0	COL1A2_ITGA1_ITGB1	COL1A2 - (ITGA1+ITGB1)	COLLAGEN	ECM-Receptor	KEGG: hsa04512
Fibroblasts	Mural cells	COL1A2	ITGA1_ITGB1	6.81936e-05	0	COL1A2_ITGA1_ITGB1	COL1A2 - (ITGA1+ITGB1)	COLLAGEN	ECM-Receptor	KEGG: hsa04512
Mural cells	Mural cells	COL1A2	ITGA1_ITGB1	1.36395e-05	0	COL1A2_ITGA1_ITGB1	COL1A2 - (ITGA1+ITGB1)	COLLAGEN	ECM-Receptor	KEGG: hsa04512
Fibroblasts	Neuronal cells	COL1A2	ITGA1_ITGB1	3.4098e-05	0	COL1A2_ITGA1_ITGB1	COL1A2 - (ITGA1+ITGB1)	COLLAGEN	ECM-Receptor	KEGG: hsa04512
Mural cells	Neuronal cells	COL1A2	ITGA1_ITGB1	6.81978e-06	0	COL1A2_ITGA1_ITGB1	COL1A2 - (ITGA1+ITGB1)	COLLAGEN	ECM-Receptor	KEGG: hsa04512
Fibroblasts	Vascular EC	COL1A2	ITGA1_ITGB1	5.39125e-05	0	COL1A2_ITGA1_ITGB1	COL1A2 - (ITGA1+ITGB1)	COLLAGEN	ECM-Receptor	KEGG: hsa04512
Mural cells	Vascular EC	COL1A2	ITGA1_ITGB1	1.0783e-05	0	COL1A2_ITGA1_ITGB1	COL1A2 - (ITGA1+ITGB1)	COLLAGEN	ECM-Receptor	KEGG: hsa04512
Endothelial cells (baboon)	Endocardial/lymphatic EC	COL4A1	ITGA1_ITGB1	2.15657e-05	0	COL4A1_ITGA1_ITGB1	COL4A1 - (ITGA1+ITGB1)	COLLAGEN	ECM-Receptor	KEGG: hsa04512
Endothelial cells (baboon)	Mural cells	COL4A1	ITGA1_ITGB1	1.36395e-05	0	COL4A1_ITGA1_ITGB1	COL4A1 - (ITGA1+ITGB1)	COLLAGEN	ECM-Receptor	KEGG: hsa04512
Endothelial cells (baboon)	Neuronal cells	COL4A1	ITGA1_ITGB1	6.81978e-06	0	COL4A1_ITGA1_ITGB1	COL4A1 - (ITGA1+ITGB1)	COLLAGEN	ECM-Receptor	KEGG: hsa04512
Endothelial cells (baboon)	Vascular EC	COL4A1	ITGA1_ITGB1	1.0783e-05	0	COL4A1_ITGA1_ITGB1	COL4A1 - (ITGA1+ITGB1)	COLLAGEN	ECM-Receptor	KEGG: hsa04512
CM	Endocardial/lymphatic EC	COL4A2	ITGA1_ITGB1	8.62573e-05	0	COL4A2_ITGA1_ITGB1	COL4A2 - (ITGA1+ITGB1)	COLLAGEN	ECM-Receptor	KEGG: hsa04512
Endocardial/lymphatic EC	Endocardial/lymphatic EC	COL4A2	ITGA1_ITGB1	0.000107819	0	COL4A2_ITGA1_ITGB1	COL4A2 - (ITGA1+ITGB1)	COLLAGEN	ECM-Receptor	KEGG: hsa04512
Endothelial cells (baboon)	Endocardial/lymphatic EC	COL4A2	ITGA1_ITGB1	6.46944e-05	0	COL4A2_ITGA1_ITGB1	COL4A2 - (ITGA1+ITGB1)	COLLAGEN	ECM-Receptor	KEGG: hsa04512
Fibroblasts	Endocardial/lymphatic EC	COL4A2	ITGA1_ITGB1	0.000215615	0	COL4A2_ITGA1_ITGB1	COL4A2 - (ITGA1+ITGB1)	COLLAGEN	ECM-Receptor	KEGG: hsa04512
Mural cells	Endocardial/lymphatic EC	COL4A2	ITGA1_ITGB1	0.000194058	0	COL4A2_ITGA1_ITGB1	COL4A2 - (ITGA1+ITGB1)	COLLAGEN	ECM-Receptor	KEGG: hsa04512
Neuronal cells	Endocardial/lymphatic EC	COL4A2	ITGA1_ITGB1	6.46944e-05	0	COL4A2_ITGA1_ITGB1	COL4A2 - (ITGA1+ITGB1)	COLLAGEN	ECM-Receptor	KEGG: hsa04512
Vascular EC	Endocardial/lymphatic EC	COL4A2	ITGA1_ITGB1	0.000107819	0	COL4A2_ITGA1_ITGB1	COL4A2 - (ITGA1+ITGB1)	COLLAGEN	ECM-Receptor	KEGG: hsa04512
CM	Mural cells	COL4A2	ITGA1_ITGB1	5.45556e-05	0	COL4A2_ITGA1_ITGB1	COL4A2 - (ITGA1+ITGB1)	COLLAGEN	ECM-Receptor	KEGG: hsa04512
Endocardial/lymphatic EC	Mural cells	COL4A2	ITGA1_ITGB1	6.81936e-05	0	COL4A2_ITGA1_ITGB1	COL4A2 - (ITGA1+ITGB1)	COLLAGEN	ECM-Receptor	KEGG: hsa04512
Endothelial cells (baboon)	Mural cells	COL4A2	ITGA1_ITGB1	4.09173e-05	0	COL4A2_ITGA1_ITGB1	COL4A2 - (ITGA1+ITGB1)	COLLAGEN	ECM-Receptor	KEGG: hsa04512
Fibroblasts	Mural cells	COL4A2	ITGA1_ITGB1	0.000136378	0	COL4A2_ITGA1_ITGB1	COL4A2 - (ITGA1+ITGB1)	COLLAGEN	ECM-Receptor	KEGG: hsa04512
Mural cells	Mural cells	COL4A2	ITGA1_ITGB1	0.000122742	0	COL4A2_ITGA1_ITGB1	COL4A2 - (ITGA1+ITGB1)	COLLAGEN	ECM-Receptor	KEGG: hsa04512
Neuronal cells	Mural cells	COL4A2	ITGA1_ITGB1	4.09173e-05	0	COL4A2_ITGA1_ITGB1	COL4A2 - (ITGA1+ITGB1)	COLLAGEN	ECM-Receptor	KEGG: hsa04512
Vascular EC	Mural cells	COL4A2	ITGA1_ITGB1	6.81936e-05	0	COL4A2_ITGA1_ITGB1	COL4A2 - (ITGA1+ITGB1)	COLLAGEN	ECM-Receptor	KEGG: hsa04512
CM	Neuronal cells	COL4A2	ITGA1_ITGB1	2.72786e-05	0	COL4A2_ITGA1_ITGB1	COL4A2 - (ITGA1+ITGB1)	COLLAGEN	ECM-Receptor	KEGG: hsa04512
Endocardial/lymphatic EC	Neuronal cells	COL4A2	ITGA1_ITGB1	3.4098e-05	0	COL4A2_ITGA1_ITGB1	COL4A2 - (ITGA1+ITGB1)	COLLAGEN	ECM-Receptor	KEGG: hsa04512
Endothelial cells (baboon)	Neuronal cells	COL4A2	ITGA1_ITGB1	2.04591e-05	0	COL4A2_ITGA1_ITGB1	COL4A2 - (ITGA1+ITGB1)	COLLAGEN	ECM-Receptor	KEGG: hsa04512
Fibroblasts	Neuronal cells	COL4A2	ITGA1_ITGB1	6.81936e-05	0	COL4A2_ITGA1_ITGB1	COL4A2 - (ITGA1+ITGB1)	COLLAGEN	ECM-Receptor	KEGG: hsa04512
Mural cells	Neuronal cells	COL4A2	ITGA1_ITGB1	6.13747e-05	0	COL4A2_ITGA1_ITGB1	COL4A2 - (ITGA1+ITGB1)	COLLAGEN	ECM-Receptor	KEGG: hsa04512
Neuronal cells	Neuronal cells	COL4A2	ITGA1_ITGB1	2.04591e-05	0	COL4A2_ITGA1_ITGB1	COL4A2 - (ITGA1+ITGB1)	COLLAGEN	ECM-Receptor	KEGG: hsa04512
Vascular EC	Neuronal cells	COL4A2	ITGA1_ITGB1	3.4098e-05	0	COL4A2_ITGA1_ITGB1	COL4A2 - (ITGA1+ITGB1)	COLLAGEN	ECM-Receptor	KEGG: hsa04512
CM	Vascular EC	COL4A2	ITGA1_ITGB1	4.31305e-05	0	COL4A2_ITGA1_ITGB1	COL4A2 - (ITGA1+ITGB1)	COLLAGEN	ECM-Receptor	KEGG: hsa04512
Endocardial/lymphatic EC	Vascular EC	COL4A2	ITGA1_ITGB1	5.39125e-05	0	COL4A2_ITGA1_ITGB1	COL4A2 - (ITGA1+ITGB1)	COLLAGEN	ECM-Receptor	KEGG: hsa04512
Endothelial cells (baboon)	Vascular EC	COL4A2	ITGA1_ITGB1	3.23482e-05	0	COL4A2_ITGA1_ITGB1	COL4A2 - (ITGA1+ITGB1)	COLLAGEN	ECM-Receptor	KEGG: hsa04512
Fibroblasts	Vascular EC	COL4A2	ITGA1_ITGB1	0.000107819	0	COL4A2_ITGA1_ITGB1	COL4A2 - (ITGA1+ITGB1)	COLLAGEN	ECM-Receptor	KEGG: hsa04512
Mural cells	Vascular EC	COL4A2	ITGA1_ITGB1	9.70384e-05	0	COL4A2_ITGA1_ITGB1	COL4A2 - (ITGA1+ITGB1)	COLLAGEN	ECM-Receptor	KEGG: hsa04512
Neuronal cells	Vascular EC	COL4A2	ITGA1_ITGB1	3.23482e-05	0	COL4A2_ITGA1_ITGB1	COL4A2 - (ITGA1+ITGB1)	COLLAGEN	ECM-Receptor	KEGG: hsa04512
Vascular EC	Vascular EC	COL4A2	ITGA1_ITGB1	5.39125e-05	0	COL4A2_ITGA1_ITGB1	COL4A2 - (ITGA1+ITGB1)	COLLAGEN	ECM-Receptor	KEGG: hsa04512
CM	Endocardial/lymphatic EC	COL4A5	ITGA1_ITGB1	2.15657e-05	0	COL4A5_ITGA1_ITGB1	COL4A5 - (ITGA1+ITGB1)	COLLAGEN	ECM-Receptor	KEGG: hsa04512
CM	Mural cells	COL4A5	ITGA1_ITGB1	1.36395e-05	0	COL4A5_ITGA1_ITGB1	COL4A5 - (ITGA1+ITGB1)	COLLAGEN	ECM-Receptor	KEGG: hsa04512
CM	Neuronal cells	COL4A5	ITGA1_ITGB1	6.81978e-06	0	COL4A5_ITGA1_ITGB1	COL4A5 - (ITGA1+ITGB1)	COLLAGEN	ECM-Receptor	KEGG: hsa04512
CM	Vascular EC	COL4A5	ITGA1_ITGB1	1.0783e-05	0	COL4A5_ITGA1_ITGB1	COL4A5 - (ITGA1+ITGB1)	COLLAGEN	ECM-Receptor	KEGG: hsa04512
Fibroblasts	Endocardial/lymphatic EC	COL6A1	ITGA1_ITGB1	2.15657e-05	0	COL6A1_ITGA1_ITGB1	COL6A1 - (ITGA1+ITGB1)	COLLAGEN	ECM-Receptor	KEGG: hsa04512
Fibroblasts	Mural cells	COL6A1	ITGA1_ITGB1	1.36395e-05	0	COL6A1_ITGA1_ITGB1	COL6A1 - (ITGA1+ITGB1)	COLLAGEN	ECM-Receptor	KEGG: hsa04512
Fibroblasts	Neuronal cells	COL6A1	ITGA1_ITGB1	6.81978e-06	0	COL6A1_ITGA1_ITGB1	COL6A1 - (ITGA1+ITGB1)	COLLAGEN	ECM-Receptor	KEGG: hsa04512
Fibroblasts	Vascular EC	COL6A1	ITGA1_ITGB1	1.0783e-05	0	COL6A1_ITGA1_ITGB1	COL6A1 - (ITGA1+ITGB1)	COLLAGEN	ECM-Receptor	KEGG: hsa04512
Fibroblasts	Endocardial/lymphatic EC	COL6A2	ITGA1_ITGB1	2.15657e-05	0	COL6A2_ITGA1_ITGB1	COL6A2 - (ITGA1+ITGB1)	COLLAGEN	ECM-Receptor	KEGG: hsa04512
Fibroblasts	Mural cells	COL6A2	ITGA1_ITGB1	1.36395e-05	0	COL6A2_ITGA1_ITGB1	COL6A2 - (ITGA1+ITGB1)	COLLAGEN	ECM-Receptor	KEGG: hsa04512
Fibroblasts	Neuronal cells	COL6A2	ITGA1_ITGB1	6.81978e-06	0	COL6A2_ITGA1_ITGB1	COL6A2 - (ITGA1+ITGB1)	COLLAGEN	ECM-Receptor	KEGG: hsa04512
Fibroblasts	Vascular EC	COL6A2	ITGA1_ITGB1	1.0783e-05	0	COL6A2_ITGA1_ITGB1	COL6A2 - (ITGA1+ITGB1)	COLLAGEN	ECM-Receptor	KEGG: hsa04512
Fibroblasts	Endocardial/lymphatic EC	COL6A3	ITGA1_ITGB1	0.0001725	0	COL6A3_ITGA1_ITGB1	COL6A3 - (ITGA1+ITGB1)	COLLAGEN	ECM-Receptor	KEGG: hsa04512
Mural cells	Endocardial/lymphatic EC	COL6A3	ITGA1_ITGB1	2.15657e-05	0	COL6A3_ITGA1_ITGB1	COL6A3 - (ITGA1+ITGB1)	COLLAGEN	ECM-Receptor	KEGG: hsa04512
Fibroblasts	Mural cells	COL6A3	ITGA1_ITGB1	0.000109105	0	COL6A3_ITGA1_ITGB1	COL6A3 - (ITGA1+ITGB1)	COLLAGEN	ECM-Receptor	KEGG: hsa04512
Mural cells	Mural cells	COL6A3	ITGA1_ITGB1	1.36395e-05	0	COL6A3_ITGA1_ITGB1	COL6A3 - (ITGA1+ITGB1)	COLLAGEN	ECM-Receptor	KEGG: hsa04512
Fibroblasts	Neuronal cells	COL6A3	ITGA1_ITGB1	5.45556e-05	0	COL6A3_ITGA1_ITGB1	COL6A3 - (ITGA1+ITGB1)	COLLAGEN	ECM-Receptor	KEGG: hsa04512
Mural cells	Neuronal cells	COL6A3	ITGA1_ITGB1	6.81978e-06	0	COL6A3_ITGA1_ITGB1	COL6A3 - (ITGA1+ITGB1)	COLLAGEN	ECM-Receptor	KEGG: hsa04512
Fibroblasts	Vascular EC	COL6A3	ITGA1_ITGB1	8.62573e-05	0	COL6A3_ITGA1_ITGB1	COL6A3 - (ITGA1+ITGB1)	COLLAGEN	ECM-Receptor	KEGG: hsa04512
Mural cells	Vascular EC	COL6A3	ITGA1_ITGB1	1.0783e-05	0	COL6A3_ITGA1_ITGB1	COL6A3 - (ITGA1+ITGB1)	COLLAGEN	ECM-Receptor	KEGG: hsa04512
Fibroblasts	Vascular EC	COL1A1	ITGA2_ITGB1	1.9289e-05	0	COL1A1_ITGA2_ITGB1	COL1A1 - (ITGA2+ITGB1)	COLLAGEN	ECM-Receptor	KEGG: hsa04512
Fibroblasts	Vascular EC	COL1A2	ITGA2_ITGB1	2.41111e-05	0	COL1A2_ITGA2_ITGB1	COL1A2 - (ITGA2+ITGB1)	COLLAGEN	ECM-Receptor	KEGG: hsa04512
Mural cells	Vascular EC	COL1A2	ITGA2_ITGB1	4.82232e-06	0	COL1A2_ITGA2_ITGB1	COL1A2 - (ITGA2+ITGB1)	COLLAGEN	ECM-Receptor	KEGG: hsa04512
Endothelial cells (baboon)	Vascular EC	COL4A1	ITGA2_ITGB1	4.82232e-06	0	COL4A1_ITGA2_ITGB1	COL4A1 - (ITGA2+ITGB1)	COLLAGEN	ECM-Receptor	KEGG: hsa04512
CM	Vascular EC	COL4A2	ITGA2_ITGB1	1.9289e-05	0	COL4A2_ITGA2_ITGB1	COL4A2 - (ITGA2+ITGB1)	COLLAGEN	ECM-Receptor	KEGG: hsa04512
Endocardial/lymphatic EC	Vascular EC	COL4A2	ITGA2_ITGB1	2.41111e-05	0	COL4A2_ITGA2_ITGB1	COL4A2 - (ITGA2+ITGB1)	COLLAGEN	ECM-Receptor	KEGG: hsa04512
Endothelial cells (baboon)	Vascular EC	COL4A2	ITGA2_ITGB1	1.44668e-05	0	COL4A2_ITGA2_ITGB1	COL4A2 - (ITGA2+ITGB1)	COLLAGEN	ECM-Receptor	KEGG: hsa04512
Fibroblasts	Vascular EC	COL4A2	ITGA2_ITGB1	4.82211e-05	0	COL4A2_ITGA2_ITGB1	COL4A2 - (ITGA2+ITGB1)	COLLAGEN	ECM-Receptor	KEGG: hsa04512
Mural cells	Vascular EC	COL4A2	ITGA2_ITGB1	4.33992e-05	0	COL4A2_ITGA2_ITGB1	COL4A2 - (ITGA2+ITGB1)	COLLAGEN	ECM-Receptor	KEGG: hsa04512
Neuronal cells	Vascular EC	COL4A2	ITGA2_ITGB1	1.44668e-05	0	COL4A2_ITGA2_ITGB1	COL4A2 - (ITGA2+ITGB1)	COLLAGEN	ECM-Receptor	KEGG: hsa04512
Vascular EC	Vascular EC	COL4A2	ITGA2_ITGB1	2.41111e-05	0	COL4A2_ITGA2_ITGB1	COL4A2 - (ITGA2+ITGB1)	COLLAGEN	ECM-Receptor	KEGG: hsa04512
CM	Vascular EC	COL4A5	ITGA2_ITGB1	4.82232e-06	0	COL4A5_ITGA2_ITGB1	COL4A5 - (ITGA2+ITGB1)	COLLAGEN	ECM-Receptor	KEGG: hsa04512
Fibroblasts	Vascular EC	COL6A1	ITGA2_ITGB1	4.82232e-06	0	COL6A1_ITGA2_ITGB1	COL6A1 - (ITGA2+ITGB1)	COLLAGEN	ECM-Receptor	KEGG: hsa04512
Fibroblasts	Vascular EC	COL6A2	ITGA2_ITGB1	4.82232e-06	0	COL6A2_ITGA2_ITGB1	COL6A2 - (ITGA2+ITGB1)	COLLAGEN	ECM-Receptor	KEGG: hsa04512
Fibroblasts	Vascular EC	COL6A3	ITGA2_ITGB1	3.85773e-05	0	COL6A3_ITGA2_ITGB1	COL6A3 - (ITGA2+ITGB1)	COLLAGEN	ECM-Receptor	KEGG: hsa04512
Mural cells	Vascular EC	COL6A3	ITGA2_ITGB1	4.82232e-06	0	COL6A3_ITGA2_ITGB1	COL6A3 - (ITGA2+ITGB1)	COLLAGEN	ECM-Receptor	KEGG: hsa04512
Endocardial/lymphatic EC	CM	FN1	ITGA5_ITGB1	4.82232e-06	0	FN1_ITGA5_ITGB1	FN1 - (ITGA5+ITGB1)	FN1	ECM-Receptor	KEGG: hsa04512
Endothelial cells (baboon)	CM	FN1	ITGA5_ITGB1	4.82232e-06	0.03	FN1_ITGA5_ITGB1	FN1 - (ITGA5+ITGB1)	FN1	ECM-Receptor	KEGG: hsa04512
Fibroblasts	CM	FN1	ITGA5_ITGB1	4.82211e-05	0	FN1_ITGA5_ITGB1	FN1 - (ITGA5+ITGB1)	FN1	ECM-Receptor	KEGG: hsa04512
Mural cells	CM	FN1	ITGA5_ITGB1	4.82232e-06	0	FN1_ITGA5_ITGB1	FN1 - (ITGA5+ITGB1)	FN1	ECM-Receptor	KEGG: hsa04512
Endocardial/lymphatic EC	Endocardial/lymphatic EC	FN1	ITGA5_ITGB1	9.6446e-06	0	FN1_ITGA5_ITGB1	FN1 - (ITGA5+ITGB1)	FN1	ECM-Receptor	KEGG: hsa04512
Endothelial cells (baboon)	Endocardial/lymphatic EC	FN1	ITGA5_ITGB1	9.6446e-06	0.02	FN1_ITGA5_ITGB1	FN1 - (ITGA5+ITGB1)	FN1	ECM-Receptor	KEGG: hsa04512
Fibroblasts	Endocardial/lymphatic EC	FN1	ITGA5_ITGB1	9.64376e-05	0	FN1_ITGA5_ITGB1	FN1 - (ITGA5+ITGB1)	FN1	ECM-Receptor	KEGG: hsa04512
Mural cells	Endocardial/lymphatic EC	FN1	ITGA5_ITGB1	9.6446e-06	0	FN1_ITGA5_ITGB1	FN1 - (ITGA5+ITGB1)	FN1	ECM-Receptor	KEGG: hsa04512
CM	Endocardial/lymphatic EC	LAMA4	ITGA1_ITGB1	8.62573e-05	0	LAMA4_ITGA1_ITGB1	LAMA4 - (ITGA1+ITGB1)	LAMININ	ECM-Receptor	KEGG: hsa04512
Endocardial/lymphatic EC	Endocardial/lymphatic EC	LAMA4	ITGA1_ITGB1	0.000215615	0	LAMA4_ITGA1_ITGB1	LAMA4 - (ITGA1+ITGB1)	LAMININ	ECM-Receptor	KEGG: hsa04512
Fibroblasts	Endocardial/lymphatic EC	LAMA4	ITGA1_ITGB1	8.62573e-05	0	LAMA4_ITGA1_ITGB1	LAMA4 - (ITGA1+ITGB1)	LAMININ	ECM-Receptor	KEGG: hsa04512
Mural cells	Endocardial/lymphatic EC	LAMA4	ITGA1_ITGB1	2.15657e-05	0	LAMA4_ITGA1_ITGB1	LAMA4 - (ITGA1+ITGB1)	LAMININ	ECM-Receptor	KEGG: hsa04512
Neuronal cells	Endocardial/lymphatic EC	LAMA4	ITGA1_ITGB1	2.15657e-05	0	LAMA4_ITGA1_ITGB1	LAMA4 - (ITGA1+ITGB1)	LAMININ	ECM-Receptor	KEGG: hsa04512
Vascular EC	Endocardial/lymphatic EC	LAMA4	ITGA1_ITGB1	8.62573e-05	0	LAMA4_ITGA1_ITGB1	LAMA4 - (ITGA1+ITGB1)	LAMININ	ECM-Receptor	KEGG: hsa04512
CM	Mural cells	LAMA4	ITGA1_ITGB1	5.45556e-05	0	LAMA4_ITGA1_ITGB1	LAMA4 - (ITGA1+ITGB1)	LAMININ	ECM-Receptor	KEGG: hsa04512
Endocardial/lymphatic EC	Mural cells	LAMA4	ITGA1_ITGB1	0.000136378	0	LAMA4_ITGA1_ITGB1	LAMA4 - (ITGA1+ITGB1)	LAMININ	ECM-Receptor	KEGG: hsa04512
Fibroblasts	Mural cells	LAMA4	ITGA1_ITGB1	5.45556e-05	0	LAMA4_ITGA1_ITGB1	LAMA4 - (ITGA1+ITGB1)	LAMININ	ECM-Receptor	KEGG: hsa04512
Mural cells	Mural cells	LAMA4	ITGA1_ITGB1	1.36395e-05	0	LAMA4_ITGA1_ITGB1	LAMA4 - (ITGA1+ITGB1)	LAMININ	ECM-Receptor	KEGG: hsa04512
Neuronal cells	Mural cells	LAMA4	ITGA1_ITGB1	1.36395e-05	0	LAMA4_ITGA1_ITGB1	LAMA4 - (ITGA1+ITGB1)	LAMININ	ECM-Receptor	KEGG: hsa04512
Vascular EC	Mural cells	LAMA4	ITGA1_ITGB1	5.45556e-05	0	LAMA4_ITGA1_ITGB1	LAMA4 - (ITGA1+ITGB1)	LAMININ	ECM-Receptor	KEGG: hsa04512
CM	Neuronal cells	LAMA4	ITGA1_ITGB1	2.72786e-05	0	LAMA4_ITGA1_ITGB1	LAMA4 - (ITGA1+ITGB1)	LAMININ	ECM-Receptor	KEGG: hsa04512
Endocardial/lymphatic EC	Neuronal cells	LAMA4	ITGA1_ITGB1	6.81936e-05	0	LAMA4_ITGA1_ITGB1	LAMA4 - (ITGA1+ITGB1)	LAMININ	ECM-Receptor	KEGG: hsa04512
Fibroblasts	Neuronal cells	LAMA4	ITGA1_ITGB1	2.72786e-05	0	LAMA4_ITGA1_ITGB1	LAMA4 - (ITGA1+ITGB1)	LAMININ	ECM-Receptor	KEGG: hsa04512
Mural cells	Neuronal cells	LAMA4	ITGA1_ITGB1	6.81978e-06	0	LAMA4_ITGA1_ITGB1	LAMA4 - (ITGA1+ITGB1)	LAMININ	ECM-Receptor	KEGG: hsa04512
Neuronal cells	Neuronal cells	LAMA4	ITGA1_ITGB1	6.81978e-06	0	LAMA4_ITGA1_ITGB1	LAMA4 - (ITGA1+ITGB1)	LAMININ	ECM-Receptor	KEGG: hsa04512
Vascular EC	Neuronal cells	LAMA4	ITGA1_ITGB1	2.72786e-05	0	LAMA4_ITGA1_ITGB1	LAMA4 - (ITGA1+ITGB1)	LAMININ	ECM-Receptor	KEGG: hsa04512
CM	Vascular EC	LAMA4	ITGA1_ITGB1	4.31305e-05	0	LAMA4_ITGA1_ITGB1	LAMA4 - (ITGA1+ITGB1)	LAMININ	ECM-Receptor	KEGG: hsa04512
Endocardial/lymphatic EC	Vascular EC	LAMA4	ITGA1_ITGB1	0.000107819	0	LAMA4_ITGA1_ITGB1	LAMA4 - (ITGA1+ITGB1)	LAMININ	ECM-Receptor	KEGG: hsa04512
Fibroblasts	Vascular EC	LAMA4	ITGA1_ITGB1	4.31305e-05	0	LAMA4_ITGA1_ITGB1	LAMA4 - (ITGA1+ITGB1)	LAMININ	ECM-Receptor	KEGG: hsa04512
Mural cells	Vascular EC	LAMA4	ITGA1_ITGB1	1.0783e-05	0	LAMA4_ITGA1_ITGB1	LAMA4 - (ITGA1+ITGB1)	LAMININ	ECM-Receptor	KEGG: hsa04512
Neuronal cells	Vascular EC	LAMA4	ITGA1_ITGB1	1.0783e-05	0	LAMA4_ITGA1_ITGB1	LAMA4 - (ITGA1+ITGB1)	LAMININ	ECM-Receptor	KEGG: hsa04512
Vascular EC	Vascular EC	LAMA4	ITGA1_ITGB1	4.31305e-05	0	LAMA4_ITGA1_ITGB1	LAMA4 - (ITGA1+ITGB1)	LAMININ	ECM-Receptor	KEGG: hsa04512
Endocardial/lymphatic EC	Endocardial/lymphatic EC	LAMB1	ITGA1_ITGB1	2.15657e-05	0	LAMB1_ITGA1_ITGB1	LAMB1 - (ITGA1+ITGB1)	LAMININ	ECM-Receptor	KEGG: hsa04512
Fibroblasts	Endocardial/lymphatic EC	LAMB1	ITGA1_ITGB1	0.000107819	0	LAMB1_ITGA1_ITGB1	LAMB1 - (ITGA1+ITGB1)	LAMININ	ECM-Receptor	KEGG: hsa04512
Mural cells	Endocardial/lymphatic EC	LAMB1	ITGA1_ITGB1	2.15657e-05	0	LAMB1_ITGA1_ITGB1	LAMB1 - (ITGA1+ITGB1)	LAMININ	ECM-Receptor	KEGG: hsa04512
Neuronal cells	Endocardial/lymphatic EC	LAMB1	ITGA1_ITGB1	2.15657e-05	0	LAMB1_ITGA1_ITGB1	LAMB1 - (ITGA1+ITGB1)	LAMININ	ECM-Receptor	KEGG: hsa04512
Vascular EC	Endocardial/lymphatic EC	LAMB1	ITGA1_ITGB1	2.15657e-05	0	LAMB1_ITGA1_ITGB1	LAMB1 - (ITGA1+ITGB1)	LAMININ	ECM-Receptor	KEGG: hsa04512
Endocardial/lymphatic EC	Mural cells	LAMB1	ITGA1_ITGB1	1.36395e-05	0	LAMB1_ITGA1_ITGB1	LAMB1 - (ITGA1+ITGB1)	LAMININ	ECM-Receptor	KEGG: hsa04512
Fibroblasts	Mural cells	LAMB1	ITGA1_ITGB1	6.81936e-05	0	LAMB1_ITGA1_ITGB1	LAMB1 - (ITGA1+ITGB1)	LAMININ	ECM-Receptor	KEGG: hsa04512
Mural cells	Mural cells	LAMB1	ITGA1_ITGB1	1.36395e-05	0	LAMB1_ITGA1_ITGB1	LAMB1 - (ITGA1+ITGB1)	LAMININ	ECM-Receptor	KEGG: hsa04512
Neuronal cells	Mural cells	LAMB1	ITGA1_ITGB1	1.36395e-05	0	LAMB1_ITGA1_ITGB1	LAMB1 - (ITGA1+ITGB1)	LAMININ	ECM-Receptor	KEGG: hsa04512
Vascular EC	Mural cells	LAMB1	ITGA1_ITGB1	1.36395e-05	0	LAMB1_ITGA1_ITGB1	LAMB1 - (ITGA1+ITGB1)	LAMININ	ECM-Receptor	KEGG: hsa04512
Endocardial/lymphatic EC	Neuronal cells	LAMB1	ITGA1_ITGB1	6.81978e-06	0	LAMB1_ITGA1_ITGB1	LAMB1 - (ITGA1+ITGB1)	LAMININ	ECM-Receptor	KEGG: hsa04512
Fibroblasts	Neuronal cells	LAMB1	ITGA1_ITGB1	3.4098e-05	0	LAMB1_ITGA1_ITGB1	LAMB1 - (ITGA1+ITGB1)	LAMININ	ECM-Receptor	KEGG: hsa04512
Mural cells	Neuronal cells	LAMB1	ITGA1_ITGB1	6.81978e-06	0	LAMB1_ITGA1_ITGB1	LAMB1 - (ITGA1+ITGB1)	LAMININ	ECM-Receptor	KEGG: hsa04512
Neuronal cells	Neuronal cells	LAMB1	ITGA1_ITGB1	6.81978e-06	0	LAMB1_ITGA1_ITGB1	LAMB1 - (ITGA1+ITGB1)	LAMININ	ECM-Receptor	KEGG: hsa04512
Vascular EC	Neuronal cells	LAMB1	ITGA1_ITGB1	6.81978e-06	0	LAMB1_ITGA1_ITGB1	LAMB1 - (ITGA1+ITGB1)	LAMININ	ECM-Receptor	KEGG: hsa04512
Endocardial/lymphatic EC	Vascular EC	LAMB1	ITGA1_ITGB1	1.0783e-05	0	LAMB1_ITGA1_ITGB1	LAMB1 - (ITGA1+ITGB1)	LAMININ	ECM-Receptor	KEGG: hsa04512
Fibroblasts	Vascular EC	LAMB1	ITGA1_ITGB1	5.39125e-05	0	LAMB1_ITGA1_ITGB1	LAMB1 - (ITGA1+ITGB1)	LAMININ	ECM-Receptor	KEGG: hsa04512
Mural cells	Vascular EC	LAMB1	ITGA1_ITGB1	1.0783e-05	0	LAMB1_ITGA1_ITGB1	LAMB1 - (ITGA1+ITGB1)	LAMININ	ECM-Receptor	KEGG: hsa04512
Neuronal cells	Vascular EC	LAMB1	ITGA1_ITGB1	1.0783e-05	0	LAMB1_ITGA1_ITGB1	LAMB1 - (ITGA1+ITGB1)	LAMININ	ECM-Receptor	KEGG: hsa04512
Vascular EC	Vascular EC	LAMB1	ITGA1_ITGB1	1.0783e-05	0	LAMB1_ITGA1_ITGB1	LAMB1 - (ITGA1+ITGB1)	LAMININ	ECM-Receptor	KEGG: hsa04512
CM	Endocardial/lymphatic EC	LAMC1	ITGA1_ITGB1	8.62573e-05	0	LAMC1_ITGA1_ITGB1	LAMC1 - (ITGA1+ITGB1)	LAMININ	ECM-Receptor	KEGG: hsa04512
Endocardial/lymphatic EC	Endocardial/lymphatic EC	LAMC1	ITGA1_ITGB1	0.000107819	0	LAMC1_ITGA1_ITGB1	LAMC1 - (ITGA1+ITGB1)	LAMININ	ECM-Receptor	KEGG: hsa04512
Endothelial cells (baboon)	Endocardial/lymphatic EC	LAMC1	ITGA1_ITGB1	1.0783e-05	0	LAMC1_ITGA1_ITGB1	LAMC1 - (ITGA1+ITGB1)	LAMININ	ECM-Receptor	KEGG: hsa04512
Fibroblasts	Endocardial/lymphatic EC	LAMC1	ITGA1_ITGB1	0.000215615	0	LAMC1_ITGA1_ITGB1	LAMC1 - (ITGA1+ITGB1)	LAMININ	ECM-Receptor	KEGG: hsa04512
Mural cells	Endocardial/lymphatic EC	LAMC1	ITGA1_ITGB1	8.62573e-05	0	LAMC1_ITGA1_ITGB1	LAMC1 - (ITGA1+ITGB1)	LAMININ	ECM-Receptor	KEGG: hsa04512
Neuronal cells	Endocardial/lymphatic EC	LAMC1	ITGA1_ITGB1	8.62573e-05	0	LAMC1_ITGA1_ITGB1	LAMC1 - (ITGA1+ITGB1)	LAMININ	ECM-Receptor	KEGG: hsa04512
Vascular EC	Endocardial/lymphatic EC	LAMC1	ITGA1_ITGB1	2.15657e-05	0	LAMC1_ITGA1_ITGB1	LAMC1 - (ITGA1+ITGB1)	LAMININ	ECM-Receptor	KEGG: hsa04512
CM	Mural cells	LAMC1	ITGA1_ITGB1	5.45556e-05	0	LAMC1_ITGA1_ITGB1	LAMC1 - (ITGA1+ITGB1)	LAMININ	ECM-Receptor	KEGG: hsa04512
Endocardial/lymphatic EC	Mural cells	LAMC1	ITGA1_ITGB1	6.81936e-05	0	LAMC1_ITGA1_ITGB1	LAMC1 - (ITGA1+ITGB1)	LAMININ	ECM-Receptor	KEGG: hsa04512
Endothelial cells (baboon)	Mural cells	LAMC1	ITGA1_ITGB1	6.81978e-06	0	LAMC1_ITGA1_ITGB1	LAMC1 - (ITGA1+ITGB1)	LAMININ	ECM-Receptor	KEGG: hsa04512
Fibroblasts	Mural cells	LAMC1	ITGA1_ITGB1	0.000136378	0	LAMC1_ITGA1_ITGB1	LAMC1 - (ITGA1+ITGB1)	LAMININ	ECM-Receptor	KEGG: hsa04512
Mural cells	Mural cells	LAMC1	ITGA1_ITGB1	5.45556e-05	0	LAMC1_ITGA1_ITGB1	LAMC1 - (ITGA1+ITGB1)	LAMININ	ECM-Receptor	KEGG: hsa04512
Neuronal cells	Mural cells	LAMC1	ITGA1_ITGB1	5.45556e-05	0	LAMC1_ITGA1_ITGB1	LAMC1 - (ITGA1+ITGB1)	LAMININ	ECM-Receptor	KEGG: hsa04512
Vascular EC	Mural cells	LAMC1	ITGA1_ITGB1	1.36395e-05	0	LAMC1_ITGA1_ITGB1	LAMC1 - (ITGA1+ITGB1)	LAMININ	ECM-Receptor	KEGG: hsa04512
CM	Neuronal cells	LAMC1	ITGA1_ITGB1	2.72786e-05	0	LAMC1_ITGA1_ITGB1	LAMC1 - (ITGA1+ITGB1)	LAMININ	ECM-Receptor	KEGG: hsa04512
Endocardial/lymphatic EC	Neuronal cells	LAMC1	ITGA1_ITGB1	3.4098e-05	0	LAMC1_ITGA1_ITGB1	LAMC1 - (ITGA1+ITGB1)	LAMININ	ECM-Receptor	KEGG: hsa04512
Endothelial cells (baboon)	Neuronal cells	LAMC1	ITGA1_ITGB1	3.4099e-06	0	LAMC1_ITGA1_ITGB1	LAMC1 - (ITGA1+ITGB1)	LAMININ	ECM-Receptor	KEGG: hsa04512
Fibroblasts	Neuronal cells	LAMC1	ITGA1_ITGB1	6.81936e-05	0	LAMC1_ITGA1_ITGB1	LAMC1 - (ITGA1+ITGB1)	LAMININ	ECM-Receptor	KEGG: hsa04512
Mural cells	Neuronal cells	LAMC1	ITGA1_ITGB1	2.72786e-05	0	LAMC1_ITGA1_ITGB1	LAMC1 - (ITGA1+ITGB1)	LAMININ	ECM-Receptor	KEGG: hsa04512
Neuronal cells	Neuronal cells	LAMC1	ITGA1_ITGB1	2.72786e-05	0	LAMC1_ITGA1_ITGB1	LAMC1 - (ITGA1+ITGB1)	LAMININ	ECM-Receptor	KEGG: hsa04512
Vascular EC	Neuronal cells	LAMC1	ITGA1_ITGB1	6.81978e-06	0	LAMC1_ITGA1_ITGB1	LAMC1 - (ITGA1+ITGB1)	LAMININ	ECM-Receptor	KEGG: hsa04512
CM	Vascular EC	LAMC1	ITGA1_ITGB1	4.31305e-05	0	LAMC1_ITGA1_ITGB1	LAMC1 - (ITGA1+ITGB1)	LAMININ	ECM-Receptor	KEGG: hsa04512
Endocardial/lymphatic EC	Vascular EC	LAMC1	ITGA1_ITGB1	5.39125e-05	0	LAMC1_ITGA1_ITGB1	LAMC1 - (ITGA1+ITGB1)	LAMININ	ECM-Receptor	KEGG: hsa04512
Endothelial cells (baboon)	Vascular EC	LAMC1	ITGA1_ITGB1	5.39152e-06	0	LAMC1_ITGA1_ITGB1	LAMC1 - (ITGA1+ITGB1)	LAMININ	ECM-Receptor	KEGG: hsa04512
Fibroblasts	Vascular EC	LAMC1	ITGA1_ITGB1	0.000107819	0	LAMC1_ITGA1_ITGB1	LAMC1 - (ITGA1+ITGB1)	LAMININ	ECM-Receptor	KEGG: hsa04512
Mural cells	Vascular EC	LAMC1	ITGA1_ITGB1	4.31305e-05	0	LAMC1_ITGA1_ITGB1	LAMC1 - (ITGA1+ITGB1)	LAMININ	ECM-Receptor	KEGG: hsa04512
Neuronal cells	Vascular EC	LAMC1	ITGA1_ITGB1	4.31305e-05	0	LAMC1_ITGA1_ITGB1	LAMC1 - (ITGA1+ITGB1)	LAMININ	ECM-Receptor	KEGG: hsa04512
Vascular EC	Vascular EC	LAMC1	ITGA1_ITGB1	1.0783e-05	0	LAMC1_ITGA1_ITGB1	LAMC1 - (ITGA1+ITGB1)	LAMININ	ECM-Receptor	KEGG: hsa04512
CM	Vascular EC	LAMA4	ITGA2_ITGB1	1.9289e-05	0	LAMA4_ITGA2_ITGB1	LAMA4 - (ITGA2+ITGB1)	LAMININ	ECM-Receptor	KEGG: hsa04512
Endocardial/lymphatic EC	Vascular EC	LAMA4	ITGA2_ITGB1	4.82211e-05	0	LAMA4_ITGA2_ITGB1	LAMA4 - (ITGA2+ITGB1)	LAMININ	ECM-Receptor	KEGG: hsa04512
Fibroblasts	Vascular EC	LAMA4	ITGA2_ITGB1	1.9289e-05	0	LAMA4_ITGA2_ITGB1	LAMA4 - (ITGA2+ITGB1)	LAMININ	ECM-Receptor	KEGG: hsa04512
Mural cells	Vascular EC	LAMA4	ITGA2_ITGB1	4.82232e-06	0	LAMA4_ITGA2_ITGB1	LAMA4 - (ITGA2+ITGB1)	LAMININ	ECM-Receptor	KEGG: hsa04512
Neuronal cells	Vascular EC	LAMA4	ITGA2_ITGB1	4.82232e-06	0	LAMA4_ITGA2_ITGB1	LAMA4 - (ITGA2+ITGB1)	LAMININ	ECM-Receptor	KEGG: hsa04512
Vascular EC	Vascular EC	LAMA4	ITGA2_ITGB1	1.9289e-05	0	LAMA4_ITGA2_ITGB1	LAMA4 - (ITGA2+ITGB1)	LAMININ	ECM-Receptor	KEGG: hsa04512
Endocardial/lymphatic EC	Vascular EC	LAMB1	ITGA2_ITGB1	4.82232e-06	0	LAMB1_ITGA2_ITGB1	LAMB1 - (ITGA2+ITGB1)	LAMININ	ECM-Receptor	KEGG: hsa04512
Fibroblasts	Vascular EC	LAMB1	ITGA2_ITGB1	2.41111e-05	0	LAMB1_ITGA2_ITGB1	LAMB1 - (ITGA2+ITGB1)	LAMININ	ECM-Receptor	KEGG: hsa04512
Mural cells	Vascular EC	LAMB1	ITGA2_ITGB1	4.82232e-06	0	LAMB1_ITGA2_ITGB1	LAMB1 - (ITGA2+ITGB1)	LAMININ	ECM-Receptor	KEGG: hsa04512
Neuronal cells	Vascular EC	LAMB1	ITGA2_ITGB1	4.82232e-06	0	LAMB1_ITGA2_ITGB1	LAMB1 - (ITGA2+ITGB1)	LAMININ	ECM-Receptor	KEGG: hsa04512
Vascular EC	Vascular EC	LAMB1	ITGA2_ITGB1	4.82232e-06	0	LAMB1_ITGA2_ITGB1	LAMB1 - (ITGA2+ITGB1)	LAMININ	ECM-Receptor	KEGG: hsa04512
CM	Vascular EC	LAMC1	ITGA2_ITGB1	1.9289e-05	0	LAMC1_ITGA2_ITGB1	LAMC1 - (ITGA2+ITGB1)	LAMININ	ECM-Receptor	KEGG: hsa04512
Endocardial/lymphatic EC	Vascular EC	LAMC1	ITGA2_ITGB1	2.41111e-05	0	LAMC1_ITGA2_ITGB1	LAMC1 - (ITGA2+ITGB1)	LAMININ	ECM-Receptor	KEGG: hsa04512
Endothelial cells (baboon)	Vascular EC	LAMC1	ITGA2_ITGB1	2.41117e-06	0	LAMC1_ITGA2_ITGB1	LAMC1 - (ITGA2+ITGB1)	LAMININ	ECM-Receptor	KEGG: hsa04512
Fibroblasts	Vascular EC	LAMC1	ITGA2_ITGB1	4.82211e-05	0	LAMC1_ITGA2_ITGB1	LAMC1 - (ITGA2+ITGB1)	LAMININ	ECM-Receptor	KEGG: hsa04512
Mural cells	Vascular EC	LAMC1	ITGA2_ITGB1	1.9289e-05	0	LAMC1_ITGA2_ITGB1	LAMC1 - (ITGA2+ITGB1)	LAMININ	ECM-Receptor	KEGG: hsa04512
Neuronal cells	Vascular EC	LAMC1	ITGA2_ITGB1	1.9289e-05	0	LAMC1_ITGA2_ITGB1	LAMC1 - (ITGA2+ITGB1)	LAMININ	ECM-Receptor	KEGG: hsa04512
Vascular EC	Vascular EC	LAMC1	ITGA2_ITGB1	4.82232e-06	0	LAMC1_ITGA2_ITGB1	LAMC1 - (ITGA2+ITGB1)	LAMININ	ECM-Receptor	KEGG: hsa04512
CM	Endocardial/lymphatic EC	LAMA4	ITGA6_ITGB1	3.85773e-05	0	LAMA4_ITGA6_ITGB1	LAMA4 - (ITGA6+ITGB1)	LAMININ	ECM-Receptor	KEGG: hsa04512
Endocardial/lymphatic EC	Endocardial/lymphatic EC	LAMA4	ITGA6_ITGB1	9.64376e-05	0	LAMA4_ITGA6_ITGB1	LAMA4 - (ITGA6+ITGB1)	LAMININ	ECM-Receptor	KEGG: hsa04512
Fibroblasts	Endocardial/lymphatic EC	LAMA4	ITGA6_ITGB1	3.85773e-05	0	LAMA4_ITGA6_ITGB1	LAMA4 - (ITGA6+ITGB1)	LAMININ	ECM-Receptor	KEGG: hsa04512
Mural cells	Endocardial/lymphatic EC	LAMA4	ITGA6_ITGB1	9.6446e-06	0	LAMA4_ITGA6_ITGB1	LAMA4 - (ITGA6+ITGB1)	LAMININ	ECM-Receptor	KEGG: hsa04512
Neuronal cells	Endocardial/lymphatic EC	LAMA4	ITGA6_ITGB1	9.6446e-06	0	LAMA4_ITGA6_ITGB1	LAMA4 - (ITGA6+ITGB1)	LAMININ	ECM-Receptor	KEGG: hsa04512
Vascular EC	Endocardial/lymphatic EC	LAMA4	ITGA6_ITGB1	3.85773e-05	0	LAMA4_ITGA6_ITGB1	LAMA4 - (ITGA6+ITGB1)	LAMININ	ECM-Receptor	KEGG: hsa04512
CM	Vascular EC	LAMA4	ITGA6_ITGB1	4.31305e-05	0	LAMA4_ITGA6_ITGB1	LAMA4 - (ITGA6+ITGB1)	LAMININ	ECM-Receptor	KEGG: hsa04512
Endocardial/lymphatic EC	Vascular EC	LAMA4	ITGA6_ITGB1	0.000107819	0	LAMA4_ITGA6_ITGB1	LAMA4 - (ITGA6+ITGB1)	LAMININ	ECM-Receptor	KEGG: hsa04512
Fibroblasts	Vascular EC	LAMA4	ITGA6_ITGB1	4.31305e-05	0	LAMA4_ITGA6_ITGB1	LAMA4 - (ITGA6+ITGB1)	LAMININ	ECM-Receptor	KEGG: hsa04512
Mural cells	Vascular EC	LAMA4	ITGA6_ITGB1	1.0783e-05	0	LAMA4_ITGA6_ITGB1	LAMA4 - (ITGA6+ITGB1)	LAMININ	ECM-Receptor	KEGG: hsa04512
Neuronal cells	Vascular EC	LAMA4	ITGA6_ITGB1	1.0783e-05	0	LAMA4_ITGA6_ITGB1	LAMA4 - (ITGA6+ITGB1)	LAMININ	ECM-Receptor	KEGG: hsa04512
Vascular EC	Vascular EC	LAMA4	ITGA6_ITGB1	4.31305e-05	0	LAMA4_ITGA6_ITGB1	LAMA4 - (ITGA6+ITGB1)	LAMININ	ECM-Receptor	KEGG: hsa04512
Endocardial/lymphatic EC	Endocardial/lymphatic EC	LAMB1	ITGA6_ITGB1	9.6446e-06	0	LAMB1_ITGA6_ITGB1	LAMB1 - (ITGA6+ITGB1)	LAMININ	ECM-Receptor	KEGG: hsa04512
Fibroblasts	Endocardial/lymphatic EC	LAMB1	ITGA6_ITGB1	4.82211e-05	0	LAMB1_ITGA6_ITGB1	LAMB1 - (ITGA6+ITGB1)	LAMININ	ECM-Receptor	KEGG: hsa04512
Mural cells	Endocardial/lymphatic EC	LAMB1	ITGA6_ITGB1	9.6446e-06	0	LAMB1_ITGA6_ITGB1	LAMB1 - (ITGA6+ITGB1)	LAMININ	ECM-Receptor	KEGG: hsa04512
Neuronal cells	Endocardial/lymphatic EC	LAMB1	ITGA6_ITGB1	9.6446e-06	0	LAMB1_ITGA6_ITGB1	LAMB1 - (ITGA6+ITGB1)	LAMININ	ECM-Receptor	KEGG: hsa04512
Vascular EC	Endocardial/lymphatic EC	LAMB1	ITGA6_ITGB1	9.6446e-06	0	LAMB1_ITGA6_ITGB1	LAMB1 - (ITGA6+ITGB1)	LAMININ	ECM-Receptor	KEGG: hsa04512
Endocardial/lymphatic EC	Vascular EC	LAMB1	ITGA6_ITGB1	1.0783e-05	0	LAMB1_ITGA6_ITGB1	LAMB1 - (ITGA6+ITGB1)	LAMININ	ECM-Receptor	KEGG: hsa04512
Fibroblasts	Vascular EC	LAMB1	ITGA6_ITGB1	5.39125e-05	0	LAMB1_ITGA6_ITGB1	LAMB1 - (ITGA6+ITGB1)	LAMININ	ECM-Receptor	KEGG: hsa04512
Mural cells	Vascular EC	LAMB1	ITGA6_ITGB1	1.0783e-05	0	LAMB1_ITGA6_ITGB1	LAMB1 - (ITGA6+ITGB1)	LAMININ	ECM-Receptor	KEGG: hsa04512
Neuronal cells	Vascular EC	LAMB1	ITGA6_ITGB1	1.0783e-05	0	LAMB1_ITGA6_ITGB1	LAMB1 - (ITGA6+ITGB1)	LAMININ	ECM-Receptor	KEGG: hsa04512
Vascular EC	Vascular EC	LAMB1	ITGA6_ITGB1	1.0783e-05	0	LAMB1_ITGA6_ITGB1	LAMB1 - (ITGA6+ITGB1)	LAMININ	ECM-Receptor	KEGG: hsa04512
CM	Endocardial/lymphatic EC	LAMC1	ITGA6_ITGB1	3.85773e-05	0	LAMC1_ITGA6_ITGB1	LAMC1 - (ITGA6+ITGB1)	LAMININ	ECM-Receptor	KEGG: hsa04512
Endocardial/lymphatic EC	Endocardial/lymphatic EC	LAMC1	ITGA6_ITGB1	4.82211e-05	0	LAMC1_ITGA6_ITGB1	LAMC1 - (ITGA6+ITGB1)	LAMININ	ECM-Receptor	KEGG: hsa04512
Endothelial cells (baboon)	Endocardial/lymphatic EC	LAMC1	ITGA6_ITGB1	4.82232e-06	0	LAMC1_ITGA6_ITGB1	LAMC1 - (ITGA6+ITGB1)	LAMININ	ECM-Receptor	KEGG: hsa04512
Fibroblasts	Endocardial/lymphatic EC	LAMC1	ITGA6_ITGB1	9.64376e-05	0	LAMC1_ITGA6_ITGB1	LAMC1 - (ITGA6+ITGB1)	LAMININ	ECM-Receptor	KEGG: hsa04512
Mural cells	Endocardial/lymphatic EC	LAMC1	ITGA6_ITGB1	3.85773e-05	0	LAMC1_ITGA6_ITGB1	LAMC1 - (ITGA6+ITGB1)	LAMININ	ECM-Receptor	KEGG: hsa04512
Neuronal cells	Endocardial/lymphatic EC	LAMC1	ITGA6_ITGB1	3.85773e-05	0	LAMC1_ITGA6_ITGB1	LAMC1 - (ITGA6+ITGB1)	LAMININ	ECM-Receptor	KEGG: hsa04512
Vascular EC	Endocardial/lymphatic EC	LAMC1	ITGA6_ITGB1	9.6446e-06	0	LAMC1_ITGA6_ITGB1	LAMC1 - (ITGA6+ITGB1)	LAMININ	ECM-Receptor	KEGG: hsa04512
CM	Vascular EC	LAMC1	ITGA6_ITGB1	4.31305e-05	0	LAMC1_ITGA6_ITGB1	LAMC1 - (ITGA6+ITGB1)	LAMININ	ECM-Receptor	KEGG: hsa04512
Endocardial/lymphatic EC	Vascular EC	LAMC1	ITGA6_ITGB1	5.39125e-05	0	LAMC1_ITGA6_ITGB1	LAMC1 - (ITGA6+ITGB1)	LAMININ	ECM-Receptor	KEGG: hsa04512
Endothelial cells (baboon)	Vascular EC	LAMC1	ITGA6_ITGB1	5.39152e-06	0	LAMC1_ITGA6_ITGB1	LAMC1 - (ITGA6+ITGB1)	LAMININ	ECM-Receptor	KEGG: hsa04512
Fibroblasts	Vascular EC	LAMC1	ITGA6_ITGB1	0.000107819	0	LAMC1_ITGA6_ITGB1	LAMC1 - (ITGA6+ITGB1)	LAMININ	ECM-Receptor	KEGG: hsa04512
Mural cells	Vascular EC	LAMC1	ITGA6_ITGB1	4.31305e-05	0	LAMC1_ITGA6_ITGB1	LAMC1 - (ITGA6+ITGB1)	LAMININ	ECM-Receptor	KEGG: hsa04512
Neuronal cells	Vascular EC	LAMC1	ITGA6_ITGB1	4.31305e-05	0	LAMC1_ITGA6_ITGB1	LAMC1 - (ITGA6+ITGB1)	LAMININ	ECM-Receptor	KEGG: hsa04512
Vascular EC	Vascular EC	LAMC1	ITGA6_ITGB1	1.0783e-05	0	LAMC1_ITGA6_ITGB1	LAMC1 - (ITGA6+ITGB1)	LAMININ	ECM-Receptor	KEGG: hsa04512
Fibroblasts	CM	TNC	ITGA9_ITGB1	9.6446e-06	0	TNC_ITGA9_ITGB1	TNC - (ITGA9+ITGB1)	TENASCIN	ECM-Receptor	KEGG: hsa04512
Fibroblasts	Endocardial/lymphatic EC	TNC	ITGA9_ITGB1	5.78648e-05	0	TNC_ITGA9_ITGB1	TNC - (ITGA9+ITGB1)	TENASCIN	ECM-Receptor	KEGG: hsa04512
Fibroblasts	Vascular EC	TNC	ITGA9_ITGB1	9.6446e-06	0	TNC_ITGA9_ITGB1	TNC - (ITGA9+ITGB1)	TENASCIN	ECM-Receptor	KEGG: hsa04512
Fibroblasts	CM	COL1A1	ITGA9_ITGB1	1.9289e-05	0	COL1A1_ITGA9_ITGB1	COL1A1 - (ITGA9+ITGB1)	COLLAGEN	ECM-Receptor	KEGG: hsa04512
Fibroblasts	Endocardial/lymphatic EC	COL1A1	ITGA9_ITGB1	0.000115723	0	COL1A1_ITGA9_ITGB1	COL1A1 - (ITGA9+ITGB1)	COLLAGEN	ECM-Receptor	KEGG: hsa04512
Fibroblasts	Vascular EC	COL1A1	ITGA9_ITGB1	1.9289e-05	0	COL1A1_ITGA9_ITGB1	COL1A1 - (ITGA9+ITGB1)	COLLAGEN	ECM-Receptor	KEGG: hsa04512
Fibroblasts	CM	COL1A2	ITGA9_ITGB1	2.41111e-05	0	COL1A2_ITGA9_ITGB1	COL1A2 - (ITGA9+ITGB1)	COLLAGEN	ECM-Receptor	KEGG: hsa04512
Mural cells	CM	COL1A2	ITGA9_ITGB1	4.82232e-06	0	COL1A2_ITGA9_ITGB1	COL1A2 - (ITGA9+ITGB1)	COLLAGEN	ECM-Receptor	KEGG: hsa04512
Fibroblasts	Endocardial/lymphatic EC	COL1A2	ITGA9_ITGB1	0.000144649	0	COL1A2_ITGA9_ITGB1	COL1A2 - (ITGA9+ITGB1)	COLLAGEN	ECM-Receptor	KEGG: hsa04512
Mural cells	Endocardial/lymphatic EC	COL1A2	ITGA9_ITGB1	2.89332e-05	0	COL1A2_ITGA9_ITGB1	COL1A2 - (ITGA9+ITGB1)	COLLAGEN	ECM-Receptor	KEGG: hsa04512
Fibroblasts	Vascular EC	COL1A2	ITGA9_ITGB1	2.41111e-05	0	COL1A2_ITGA9_ITGB1	COL1A2 - (ITGA9+ITGB1)	COLLAGEN	ECM-Receptor	KEGG: hsa04512
Mural cells	Vascular EC	COL1A2	ITGA9_ITGB1	4.82232e-06	0	COL1A2_ITGA9_ITGB1	COL1A2 - (ITGA9+ITGB1)	COLLAGEN	ECM-Receptor	KEGG: hsa04512
Endothelial cells (baboon)	CM	COL4A1	ITGA9_ITGB1	4.82232e-06	0	COL4A1_ITGA9_ITGB1	COL4A1 - (ITGA9+ITGB1)	COLLAGEN	ECM-Receptor	KEGG: hsa04512
Endothelial cells (baboon)	Endocardial/lymphatic EC	COL4A1	ITGA9_ITGB1	2.89332e-05	0	COL4A1_ITGA9_ITGB1	COL4A1 - (ITGA9+ITGB1)	COLLAGEN	ECM-Receptor	KEGG: hsa04512
Endothelial cells (baboon)	Vascular EC	COL4A1	ITGA9_ITGB1	4.82232e-06	0	COL4A1_ITGA9_ITGB1	COL4A1 - (ITGA9+ITGB1)	COLLAGEN	ECM-Receptor	KEGG: hsa04512
CM	CM	COL4A2	ITGA9_ITGB1	1.9289e-05	0	COL4A2_ITGA9_ITGB1	COL4A2 - (ITGA9+ITGB1)	COLLAGEN	ECM-Receptor	KEGG: hsa04512
Endocardial/lymphatic EC	CM	COL4A2	ITGA9_ITGB1	2.41111e-05	0	COL4A2_ITGA9_ITGB1	COL4A2 - (ITGA9+ITGB1)	COLLAGEN	ECM-Receptor	KEGG: hsa04512
Endothelial cells (baboon)	CM	COL4A2	ITGA9_ITGB1	1.44668e-05	0	COL4A2_ITGA9_ITGB1	COL4A2 - (ITGA9+ITGB1)	COLLAGEN	ECM-Receptor	KEGG: hsa04512
Fibroblasts	CM	COL4A2	ITGA9_ITGB1	4.82211e-05	0	COL4A2_ITGA9_ITGB1	COL4A2 - (ITGA9+ITGB1)	COLLAGEN	ECM-Receptor	KEGG: hsa04512
Mural cells	CM	COL4A2	ITGA9_ITGB1	4.33992e-05	0	COL4A2_ITGA9_ITGB1	COL4A2 - (ITGA9+ITGB1)	COLLAGEN	ECM-Receptor	KEGG: hsa04512
Neuronal cells	CM	COL4A2	ITGA9_ITGB1	1.44668e-05	0	COL4A2_ITGA9_ITGB1	COL4A2 - (ITGA9+ITGB1)	COLLAGEN	ECM-Receptor	KEGG: hsa04512
Vascular EC	CM	COL4A2	ITGA9_ITGB1	2.41111e-05	0	COL4A2_ITGA9_ITGB1	COL4A2 - (ITGA9+ITGB1)	COLLAGEN	ECM-Receptor	KEGG: hsa04512
CM	Endocardial/lymphatic EC	COL4A2	ITGA9_ITGB1	0.000115723	0	COL4A2_ITGA9_ITGB1	COL4A2 - (ITGA9+ITGB1)	COLLAGEN	ECM-Receptor	KEGG: hsa04512
Endocardial/lymphatic EC	Endocardial/lymphatic EC	COL4A2	ITGA9_ITGB1	0.000144649	0	COL4A2_ITGA9_ITGB1	COL4A2 - (ITGA9+ITGB1)	COLLAGEN	ECM-Receptor	KEGG: hsa04512
Endothelial cells (baboon)	Endocardial/lymphatic EC	COL4A2	ITGA9_ITGB1	8.67947e-05	0	COL4A2_ITGA9_ITGB1	COL4A2 - (ITGA9+ITGB1)	COLLAGEN	ECM-Receptor	KEGG: hsa04512
Fibroblasts	Endocardial/lymphatic EC	COL4A2	ITGA9_ITGB1	0.000289257	0	COL4A2_ITGA9_ITGB1	COL4A2 - (ITGA9+ITGB1)	COLLAGEN	ECM-Receptor	KEGG: hsa04512
Mural cells	Endocardial/lymphatic EC	COL4A2	ITGA9_ITGB1	0.000260339	0	COL4A2_ITGA9_ITGB1	COL4A2 - (ITGA9+ITGB1)	COLLAGEN	ECM-Receptor	KEGG: hsa04512
Neuronal cells	Endocardial/lymphatic EC	COL4A2	ITGA9_ITGB1	8.67947e-05	0	COL4A2_ITGA9_ITGB1	COL4A2 - (ITGA9+ITGB1)	COLLAGEN	ECM-Receptor	KEGG: hsa04512
Vascular EC	Endocardial/lymphatic EC	COL4A2	ITGA9_ITGB1	0.000144649	0	COL4A2_ITGA9_ITGB1	COL4A2 - (ITGA9+ITGB1)	COLLAGEN	ECM-Receptor	KEGG: hsa04512
CM	Vascular EC	COL4A2	ITGA9_ITGB1	1.9289e-05	0	COL4A2_ITGA9_ITGB1	COL4A2 - (ITGA9+ITGB1)	COLLAGEN	ECM-Receptor	KEGG: hsa04512
Endocardial/lymphatic EC	Vascular EC	COL4A2	ITGA9_ITGB1	2.41111e-05	0	COL4A2_ITGA9_ITGB1	COL4A2 - (ITGA9+ITGB1)	COLLAGEN	ECM-Receptor	KEGG: hsa04512
Endothelial cells (baboon)	Vascular EC	COL4A2	ITGA9_ITGB1	1.44668e-05	0.01	COL4A2_ITGA9_ITGB1	COL4A2 - (ITGA9+ITGB1)	COLLAGEN	ECM-Receptor	KEGG: hsa04512
Fibroblasts	Vascular EC	COL4A2	ITGA9_ITGB1	4.82211e-05	0	COL4A2_ITGA9_ITGB1	COL4A2 - (ITGA9+ITGB1)	COLLAGEN	ECM-Receptor	KEGG: hsa04512
Mural cells	Vascular EC	COL4A2	ITGA9_ITGB1	4.33992e-05	0	COL4A2_ITGA9_ITGB1	COL4A2 - (ITGA9+ITGB1)	COLLAGEN	ECM-Receptor	KEGG: hsa04512
Neuronal cells	Vascular EC	COL4A2	ITGA9_ITGB1	1.44668e-05	0.02	COL4A2_ITGA9_ITGB1	COL4A2 - (ITGA9+ITGB1)	COLLAGEN	ECM-Receptor	KEGG: hsa04512
Vascular EC	Vascular EC	COL4A2	ITGA9_ITGB1	2.41111e-05	0	COL4A2_ITGA9_ITGB1	COL4A2 - (ITGA9+ITGB1)	COLLAGEN	ECM-Receptor	KEGG: hsa04512
CM	CM	COL4A5	ITGA9_ITGB1	4.82232e-06	0	COL4A5_ITGA9_ITGB1	COL4A5 - (ITGA9+ITGB1)	COLLAGEN	ECM-Receptor	KEGG: hsa04512
CM	Endocardial/lymphatic EC	COL4A5	ITGA9_ITGB1	2.89332e-05	0	COL4A5_ITGA9_ITGB1	COL4A5 - (ITGA9+ITGB1)	COLLAGEN	ECM-Receptor	KEGG: hsa04512
CM	Vascular EC	COL4A5	ITGA9_ITGB1	4.82232e-06	0	COL4A5_ITGA9_ITGB1	COL4A5 - (ITGA9+ITGB1)	COLLAGEN	ECM-Receptor	KEGG: hsa04512
Fibroblasts	CM	COL6A1	ITGA9_ITGB1	4.82232e-06	0	COL6A1_ITGA9_ITGB1	COL6A1 - (ITGA9+ITGB1)	COLLAGEN	ECM-Receptor	KEGG: hsa04512
Fibroblasts	Endocardial/lymphatic EC	COL6A1	ITGA9_ITGB1	2.89332e-05	0	COL6A1_ITGA9_ITGB1	COL6A1 - (ITGA9+ITGB1)	COLLAGEN	ECM-Receptor	KEGG: hsa04512
Fibroblasts	Vascular EC	COL6A1	ITGA9_ITGB1	4.82232e-06	0	COL6A1_ITGA9_ITGB1	COL6A1 - (ITGA9+ITGB1)	COLLAGEN	ECM-Receptor	KEGG: hsa04512
Fibroblasts	CM	COL6A2	ITGA9_ITGB1	4.82232e-06	0	COL6A2_ITGA9_ITGB1	COL6A2 - (ITGA9+ITGB1)	COLLAGEN	ECM-Receptor	KEGG: hsa04512
Fibroblasts	Endocardial/lymphatic EC	COL6A2	ITGA9_ITGB1	2.89332e-05	0	COL6A2_ITGA9_ITGB1	COL6A2 - (ITGA9+ITGB1)	COLLAGEN	ECM-Receptor	KEGG: hsa04512
Fibroblasts	Vascular EC	COL6A2	ITGA9_ITGB1	4.82232e-06	0	COL6A2_ITGA9_ITGB1	COL6A2 - (ITGA9+ITGB1)	COLLAGEN	ECM-Receptor	KEGG: hsa04512
Fibroblasts	CM	COL6A3	ITGA9_ITGB1	3.85773e-05	0	COL6A3_ITGA9_ITGB1	COL6A3 - (ITGA9+ITGB1)	COLLAGEN	ECM-Receptor	KEGG: hsa04512
Mural cells	CM	COL6A3	ITGA9_ITGB1	4.82232e-06	0	COL6A3_ITGA9_ITGB1	COL6A3 - (ITGA9+ITGB1)	COLLAGEN	ECM-Receptor	KEGG: hsa04512
Fibroblasts	Endocardial/lymphatic EC	COL6A3	ITGA9_ITGB1	0.000231419	0	COL6A3_ITGA9_ITGB1	COL6A3 - (ITGA9+ITGB1)	COLLAGEN	ECM-Receptor	KEGG: hsa04512
Mural cells	Endocardial/lymphatic EC	COL6A3	ITGA9_ITGB1	2.89332e-05	0	COL6A3_ITGA9_ITGB1	COL6A3 - (ITGA9+ITGB1)	COLLAGEN	ECM-Receptor	KEGG: hsa04512
Fibroblasts	Vascular EC	COL6A3	ITGA9_ITGB1	3.85773e-05	0	COL6A3_ITGA9_ITGB1	COL6A3 - (ITGA9+ITGB1)	COLLAGEN	ECM-Receptor	KEGG: hsa04512
Mural cells	Vascular EC	COL6A3	ITGA9_ITGB1	4.82232e-06	0	COL6A3_ITGA9_ITGB1	COL6A3 - (ITGA9+ITGB1)	COLLAGEN	ECM-Receptor	KEGG: hsa04512
CM	CM	LAMA4	ITGA9_ITGB1	1.9289e-05	0	LAMA4_ITGA9_ITGB1	LAMA4 - (ITGA9+ITGB1)	LAMININ	ECM-Receptor	KEGG: hsa04512
Endocardial/lymphatic EC	CM	LAMA4	ITGA9_ITGB1	4.82211e-05	0	LAMA4_ITGA9_ITGB1	LAMA4 - (ITGA9+ITGB1)	LAMININ	ECM-Receptor	KEGG: hsa04512
Fibroblasts	CM	LAMA4	ITGA9_ITGB1	1.9289e-05	0	LAMA4_ITGA9_ITGB1	LAMA4 - (ITGA9+ITGB1)	LAMININ	ECM-Receptor	KEGG: hsa04512
Mural cells	CM	LAMA4	ITGA9_ITGB1	4.82232e-06	0	LAMA4_ITGA9_ITGB1	LAMA4 - (ITGA9+ITGB1)	LAMININ	ECM-Receptor	KEGG: hsa04512
Neuronal cells	CM	LAMA4	ITGA9_ITGB1	4.82232e-06	0	LAMA4_ITGA9_ITGB1	LAMA4 - (ITGA9+ITGB1)	LAMININ	ECM-Receptor	KEGG: hsa04512
Vascular EC	CM	LAMA4	ITGA9_ITGB1	1.9289e-05	0	LAMA4_ITGA9_ITGB1	LAMA4 - (ITGA9+ITGB1)	LAMININ	ECM-Receptor	KEGG: hsa04512
CM	Endocardial/lymphatic EC	LAMA4	ITGA9_ITGB1	0.000115723	0	LAMA4_ITGA9_ITGB1	LAMA4 - (ITGA9+ITGB1)	LAMININ	ECM-Receptor	KEGG: hsa04512
Endocardial/lymphatic EC	Endocardial/lymphatic EC	LAMA4	ITGA9_ITGB1	0.000289257	0	LAMA4_ITGA9_ITGB1	LAMA4 - (ITGA9+ITGB1)	LAMININ	ECM-Receptor	KEGG: hsa04512
Fibroblasts	Endocardial/lymphatic EC	LAMA4	ITGA9_ITGB1	0.000115723	0	LAMA4_ITGA9_ITGB1	LAMA4 - (ITGA9+ITGB1)	LAMININ	ECM-Receptor	KEGG: hsa04512
Mural cells	Endocardial/lymphatic EC	LAMA4	ITGA9_ITGB1	2.89332e-05	0	LAMA4_ITGA9_ITGB1	LAMA4 - (ITGA9+ITGB1)	LAMININ	ECM-Receptor	KEGG: hsa04512
Neuronal cells	Endocardial/lymphatic EC	LAMA4	ITGA9_ITGB1	2.89332e-05	0	LAMA4_ITGA9_ITGB1	LAMA4 - (ITGA9+ITGB1)	LAMININ	ECM-Receptor	KEGG: hsa04512
Vascular EC	Endocardial/lymphatic EC	LAMA4	ITGA9_ITGB1	0.000115723	0	LAMA4_ITGA9_ITGB1	LAMA4 - (ITGA9+ITGB1)	LAMININ	ECM-Receptor	KEGG: hsa04512
CM	Vascular EC	LAMA4	ITGA9_ITGB1	1.9289e-05	0	LAMA4_ITGA9_ITGB1	LAMA4 - (ITGA9+ITGB1)	LAMININ	ECM-Receptor	KEGG: hsa04512
Endocardial/lymphatic EC	Vascular EC	LAMA4	ITGA9_ITGB1	4.82211e-05	0	LAMA4_ITGA9_ITGB1	LAMA4 - (ITGA9+ITGB1)	LAMININ	ECM-Receptor	KEGG: hsa04512
Fibroblasts	Vascular EC	LAMA4	ITGA9_ITGB1	1.9289e-05	0	LAMA4_ITGA9_ITGB1	LAMA4 - (ITGA9+ITGB1)	LAMININ	ECM-Receptor	KEGG: hsa04512
Vascular EC	Vascular EC	LAMA4	ITGA9_ITGB1	1.9289e-05	0	LAMA4_ITGA9_ITGB1	LAMA4 - (ITGA9+ITGB1)	LAMININ	ECM-Receptor	KEGG: hsa04512
Endocardial/lymphatic EC	CM	LAMB1	ITGA9_ITGB1	4.82232e-06	0	LAMB1_ITGA9_ITGB1	LAMB1 - (ITGA9+ITGB1)	LAMININ	ECM-Receptor	KEGG: hsa04512
Fibroblasts	CM	LAMB1	ITGA9_ITGB1	2.41111e-05	0	LAMB1_ITGA9_ITGB1	LAMB1 - (ITGA9+ITGB1)	LAMININ	ECM-Receptor	KEGG: hsa04512
Mural cells	CM	LAMB1	ITGA9_ITGB1	4.82232e-06	0	LAMB1_ITGA9_ITGB1	LAMB1 - (ITGA9+ITGB1)	LAMININ	ECM-Receptor	KEGG: hsa04512
Neuronal cells	CM	LAMB1	ITGA9_ITGB1	4.82232e-06	0	LAMB1_ITGA9_ITGB1	LAMB1 - (ITGA9+ITGB1)	LAMININ	ECM-Receptor	KEGG: hsa04512
Vascular EC	CM	LAMB1	ITGA9_ITGB1	4.82232e-06	0	LAMB1_ITGA9_ITGB1	LAMB1 - (ITGA9+ITGB1)	LAMININ	ECM-Receptor	KEGG: hsa04512
Endocardial/lymphatic EC	Endocardial/lymphatic EC	LAMB1	ITGA9_ITGB1	2.89332e-05	0	LAMB1_ITGA9_ITGB1	LAMB1 - (ITGA9+ITGB1)	LAMININ	ECM-Receptor	KEGG: hsa04512
Fibroblasts	Endocardial/lymphatic EC	LAMB1	ITGA9_ITGB1	0.000144649	0	LAMB1_ITGA9_ITGB1	LAMB1 - (ITGA9+ITGB1)	LAMININ	ECM-Receptor	KEGG: hsa04512
Mural cells	Endocardial/lymphatic EC	LAMB1	ITGA9_ITGB1	2.89332e-05	0	LAMB1_ITGA9_ITGB1	LAMB1 - (ITGA9+ITGB1)	LAMININ	ECM-Receptor	KEGG: hsa04512
Neuronal cells	Endocardial/lymphatic EC	LAMB1	ITGA9_ITGB1	2.89332e-05	0	LAMB1_ITGA9_ITGB1	LAMB1 - (ITGA9+ITGB1)	LAMININ	ECM-Receptor	KEGG: hsa04512
Vascular EC	Endocardial/lymphatic EC	LAMB1	ITGA9_ITGB1	2.89332e-05	0	LAMB1_ITGA9_ITGB1	LAMB1 - (ITGA9+ITGB1)	LAMININ	ECM-Receptor	KEGG: hsa04512
Endocardial/lymphatic EC	Vascular EC	LAMB1	ITGA9_ITGB1	4.82232e-06	0	LAMB1_ITGA9_ITGB1	LAMB1 - (ITGA9+ITGB1)	LAMININ	ECM-Receptor	KEGG: hsa04512
Fibroblasts	Vascular EC	LAMB1	ITGA9_ITGB1	2.41111e-05	0	LAMB1_ITGA9_ITGB1	LAMB1 - (ITGA9+ITGB1)	LAMININ	ECM-Receptor	KEGG: hsa04512
Mural cells	Vascular EC	LAMB1	ITGA9_ITGB1	4.82232e-06	0	LAMB1_ITGA9_ITGB1	LAMB1 - (ITGA9+ITGB1)	LAMININ	ECM-Receptor	KEGG: hsa04512
Neuronal cells	Vascular EC	LAMB1	ITGA9_ITGB1	4.82232e-06	0	LAMB1_ITGA9_ITGB1	LAMB1 - (ITGA9+ITGB1)	LAMININ	ECM-Receptor	KEGG: hsa04512
Vascular EC	Vascular EC	LAMB1	ITGA9_ITGB1	4.82232e-06	0	LAMB1_ITGA9_ITGB1	LAMB1 - (ITGA9+ITGB1)	LAMININ	ECM-Receptor	KEGG: hsa04512
CM	CM	LAMC1	ITGA9_ITGB1	1.9289e-05	0	LAMC1_ITGA9_ITGB1	LAMC1 - (ITGA9+ITGB1)	LAMININ	ECM-Receptor	KEGG: hsa04512
Endocardial/lymphatic EC	CM	LAMC1	ITGA9_ITGB1	2.41111e-05	0	LAMC1_ITGA9_ITGB1	LAMC1 - (ITGA9+ITGB1)	LAMININ	ECM-Receptor	KEGG: hsa04512
Endothelial cells (baboon)	CM	LAMC1	ITGA9_ITGB1	2.41117e-06	0	LAMC1_ITGA9_ITGB1	LAMC1 - (ITGA9+ITGB1)	LAMININ	ECM-Receptor	KEGG: hsa04512
Fibroblasts	CM	LAMC1	ITGA9_ITGB1	4.82211e-05	0	LAMC1_ITGA9_ITGB1	LAMC1 - (ITGA9+ITGB1)	LAMININ	ECM-Receptor	KEGG: hsa04512
Mural cells	CM	LAMC1	ITGA9_ITGB1	1.9289e-05	0	LAMC1_ITGA9_ITGB1	LAMC1 - (ITGA9+ITGB1)	LAMININ	ECM-Receptor	KEGG: hsa04512
Neuronal cells	CM	LAMC1	ITGA9_ITGB1	1.9289e-05	0	LAMC1_ITGA9_ITGB1	LAMC1 - (ITGA9+ITGB1)	LAMININ	ECM-Receptor	KEGG: hsa04512
Vascular EC	CM	LAMC1	ITGA9_ITGB1	4.82232e-06	0	LAMC1_ITGA9_ITGB1	LAMC1 - (ITGA9+ITGB1)	LAMININ	ECM-Receptor	KEGG: hsa04512
CM	Endocardial/lymphatic EC	LAMC1	ITGA9_ITGB1	0.000115723	0	LAMC1_ITGA9_ITGB1	LAMC1 - (ITGA9+ITGB1)	LAMININ	ECM-Receptor	KEGG: hsa04512
Endocardial/lymphatic EC	Endocardial/lymphatic EC	LAMC1	ITGA9_ITGB1	0.000144649	0	LAMC1_ITGA9_ITGB1	LAMC1 - (ITGA9+ITGB1)	LAMININ	ECM-Receptor	KEGG: hsa04512
Fibroblasts	Endocardial/lymphatic EC	LAMC1	ITGA9_ITGB1	0.000289257	0	LAMC1_ITGA9_ITGB1	LAMC1 - (ITGA9+ITGB1)	LAMININ	ECM-Receptor	KEGG: hsa04512
Mural cells	Endocardial/lymphatic EC	LAMC1	ITGA9_ITGB1	0.000115723	0	LAMC1_ITGA9_ITGB1	LAMC1 - (ITGA9+ITGB1)	LAMININ	ECM-Receptor	KEGG: hsa04512
Neuronal cells	Endocardial/lymphatic EC	LAMC1	ITGA9_ITGB1	0.000115723	0	LAMC1_ITGA9_ITGB1	LAMC1 - (ITGA9+ITGB1)	LAMININ	ECM-Receptor	KEGG: hsa04512
Vascular EC	Endocardial/lymphatic EC	LAMC1	ITGA9_ITGB1	2.89332e-05	0	LAMC1_ITGA9_ITGB1	LAMC1 - (ITGA9+ITGB1)	LAMININ	ECM-Receptor	KEGG: hsa04512
CM	Vascular EC	LAMC1	ITGA9_ITGB1	1.9289e-05	0	LAMC1_ITGA9_ITGB1	LAMC1 - (ITGA9+ITGB1)	LAMININ	ECM-Receptor	KEGG: hsa04512
Endocardial/lymphatic EC	Vascular EC	LAMC1	ITGA9_ITGB1	2.41111e-05	0	LAMC1_ITGA9_ITGB1	LAMC1 - (ITGA9+ITGB1)	LAMININ	ECM-Receptor	KEGG: hsa04512
Endothelial cells (baboon)	Vascular EC	LAMC1	ITGA9_ITGB1	2.41117e-06	0.04	LAMC1_ITGA9_ITGB1	LAMC1 - (ITGA9+ITGB1)	LAMININ	ECM-Receptor	KEGG: hsa04512
Fibroblasts	Vascular EC	LAMC1	ITGA9_ITGB1	4.82211e-05	0	LAMC1_ITGA9_ITGB1	LAMC1 - (ITGA9+ITGB1)	LAMININ	ECM-Receptor	KEGG: hsa04512
Mural cells	Vascular EC	LAMC1	ITGA9_ITGB1	1.9289e-05	0	LAMC1_ITGA9_ITGB1	LAMC1 - (ITGA9+ITGB1)	LAMININ	ECM-Receptor	KEGG: hsa04512
Neuronal cells	Vascular EC	LAMC1	ITGA9_ITGB1	1.9289e-05	0	LAMC1_ITGA9_ITGB1	LAMC1 - (ITGA9+ITGB1)	LAMININ	ECM-Receptor	KEGG: hsa04512
Fibroblasts	Fibroblasts	COL1A1	ITGA11_ITGB1	3.85773e-05	0	COL1A1_ITGA11_ITGB1	COL1A1 - (ITGA11+ITGB1)	COLLAGEN	ECM-Receptor	KEGG: hsa04512
Fibroblasts	Fibroblasts	COL1A2	ITGA11_ITGB1	4.82211e-05	0	COL1A2_ITGA11_ITGB1	COL1A2 - (ITGA11+ITGB1)	COLLAGEN	ECM-Receptor	KEGG: hsa04512
Mural cells	Fibroblasts	COL1A2	ITGA11_ITGB1	9.6446e-06	0	COL1A2_ITGA11_ITGB1	COL1A2 - (ITGA11+ITGB1)	COLLAGEN	ECM-Receptor	KEGG: hsa04512
Endothelial cells (baboon)	Fibroblasts	COL4A1	ITGA11_ITGB1	9.6446e-06	0	COL4A1_ITGA11_ITGB1	COL4A1 - (ITGA11+ITGB1)	COLLAGEN	ECM-Receptor	KEGG: hsa04512
CM	Fibroblasts	COL4A2	ITGA11_ITGB1	3.85773e-05	0	COL4A2_ITGA11_ITGB1	COL4A2 - (ITGA11+ITGB1)	COLLAGEN	ECM-Receptor	KEGG: hsa04512
Endocardial/lymphatic EC	Fibroblasts	COL4A2	ITGA11_ITGB1	4.82211e-05	0	COL4A2_ITGA11_ITGB1	COL4A2 - (ITGA11+ITGB1)	COLLAGEN	ECM-Receptor	KEGG: hsa04512
Endothelial cells (baboon)	Fibroblasts	COL4A2	ITGA11_ITGB1	2.89332e-05	0	COL4A2_ITGA11_ITGB1	COL4A2 - (ITGA11+ITGB1)	COLLAGEN	ECM-Receptor	KEGG: hsa04512
Fibroblasts	Fibroblasts	COL4A2	ITGA11_ITGB1	9.64376e-05	0	COL4A2_ITGA11_ITGB1	COL4A2 - (ITGA11+ITGB1)	COLLAGEN	ECM-Receptor	KEGG: hsa04512
Mural cells	Fibroblasts	COL4A2	ITGA11_ITGB1	8.67947e-05	0	COL4A2_ITGA11_ITGB1	COL4A2 - (ITGA11+ITGB1)	COLLAGEN	ECM-Receptor	KEGG: hsa04512
Neuronal cells	Fibroblasts	COL4A2	ITGA11_ITGB1	2.89332e-05	0	COL4A2_ITGA11_ITGB1	COL4A2 - (ITGA11+ITGB1)	COLLAGEN	ECM-Receptor	KEGG: hsa04512
Vascular EC	Fibroblasts	COL4A2	ITGA11_ITGB1	4.82211e-05	0	COL4A2_ITGA11_ITGB1	COL4A2 - (ITGA11+ITGB1)	COLLAGEN	ECM-Receptor	KEGG: hsa04512
CM	Fibroblasts	COL4A5	ITGA11_ITGB1	9.6446e-06	0	COL4A5_ITGA11_ITGB1	COL4A5 - (ITGA11+ITGB1)	COLLAGEN	ECM-Receptor	KEGG: hsa04512
Fibroblasts	Fibroblasts	COL6A1	ITGA11_ITGB1	9.6446e-06	0	COL6A1_ITGA11_ITGB1	COL6A1 - (ITGA11+ITGB1)	COLLAGEN	ECM-Receptor	KEGG: hsa04512
Fibroblasts	Fibroblasts	COL6A2	ITGA11_ITGB1	9.6446e-06	0	COL6A2_ITGA11_ITGB1	COL6A2 - (ITGA11+ITGB1)	COLLAGEN	ECM-Receptor	KEGG: hsa04512
Fibroblasts	Fibroblasts	COL6A3	ITGA11_ITGB1	7.71516e-05	0	COL6A3_ITGA11_ITGB1	COL6A3 - (ITGA11+ITGB1)	COLLAGEN	ECM-Receptor	KEGG: hsa04512
Mural cells	Fibroblasts	COL6A3	ITGA11_ITGB1	9.6446e-06	0	COL6A3_ITGA11_ITGB1	COL6A3 - (ITGA11+ITGB1)	COLLAGEN	ECM-Receptor	KEGG: hsa04512
Endocardial/lymphatic EC	CM	FN1	ITGAV_ITGB1	1.0783e-05	0	FN1_ITGAV_ITGB1	FN1 - (ITGAV+ITGB1)	FN1	ECM-Receptor	KEGG: hsa04512
Endothelial cells (baboon)	CM	FN1	ITGAV_ITGB1	1.0783e-05	0.02	FN1_ITGAV_ITGB1	FN1 - (ITGAV+ITGB1)	FN1	ECM-Receptor	KEGG: hsa04512
Fibroblasts	CM	FN1	ITGAV_ITGB1	0.000107819	0	FN1_ITGAV_ITGB1	FN1 - (ITGAV+ITGB1)	FN1	ECM-Receptor	KEGG: hsa04512
Mural cells	CM	FN1	ITGAV_ITGB1	1.0783e-05	0	FN1_ITGAV_ITGB1	FN1 - (ITGAV+ITGB1)	FN1	ECM-Receptor	KEGG: hsa04512
Endocardial/lymphatic EC	Endocardial/lymphatic EC	FN1	ITGAV_ITGB1	9.6446e-06	0	FN1_ITGAV_ITGB1	FN1 - (ITGAV+ITGB1)	FN1	ECM-Receptor	KEGG: hsa04512
Endothelial cells (baboon)	Endocardial/lymphatic EC	FN1	ITGAV_ITGB1	9.6446e-06	0.03	FN1_ITGAV_ITGB1	FN1 - (ITGAV+ITGB1)	FN1	ECM-Receptor	KEGG: hsa04512
Fibroblasts	Endocardial/lymphatic EC	FN1	ITGAV_ITGB1	9.64376e-05	0	FN1_ITGAV_ITGB1	FN1 - (ITGAV+ITGB1)	FN1	ECM-Receptor	KEGG: hsa04512
Mural cells	Endocardial/lymphatic EC	FN1	ITGAV_ITGB1	9.6446e-06	0	FN1_ITGAV_ITGB1	FN1 - (ITGAV+ITGB1)	FN1	ECM-Receptor	KEGG: hsa04512
Endocardial/lymphatic EC	Neuronal cells	FN1	ITGAV_ITGB1	3.4099e-06	0	FN1_ITGAV_ITGB1	FN1 - (ITGAV+ITGB1)	FN1	ECM-Receptor	KEGG: hsa04512
Fibroblasts	Neuronal cells	FN1	ITGAV_ITGB1	3.4098e-05	0	FN1_ITGAV_ITGB1	FN1 - (ITGAV+ITGB1)	FN1	ECM-Receptor	KEGG: hsa04512
Mural cells	Neuronal cells	FN1	ITGAV_ITGB1	3.4099e-06	0	FN1_ITGAV_ITGB1	FN1 - (ITGAV+ITGB1)	FN1	ECM-Receptor	KEGG: hsa04512
Endocardial/lymphatic EC	Vascular EC	FN1	ITGAV_ITGB1	4.82232e-06	0	FN1_ITGAV_ITGB1	FN1 - (ITGAV+ITGB1)	FN1	ECM-Receptor	KEGG: hsa04512
Fibroblasts	Vascular EC	FN1	ITGAV_ITGB1	4.82211e-05	0	FN1_ITGAV_ITGB1	FN1 - (ITGAV+ITGB1)	FN1	ECM-Receptor	KEGG: hsa04512
Mural cells	Vascular EC	FN1	ITGAV_ITGB1	4.82232e-06	0	FN1_ITGAV_ITGB1	FN1 - (ITGAV+ITGB1)	FN1	ECM-Receptor	KEGG: hsa04512
Fibroblasts	CM	TNC	ITGAV_ITGB6	2.15657e-05	0	TNC_ITGAV_ITGB6	TNC - (ITGAV+ITGB6)	TENASCIN	ECM-Receptor	KEGG: hsa04512
Endocardial/lymphatic EC	CM	FN1	ITGAV_ITGB6	1.0783e-05	0	FN1_ITGAV_ITGB6	FN1 - (ITGAV+ITGB6)	FN1	ECM-Receptor	KEGG: hsa04512
Endothelial cells (baboon)	CM	FN1	ITGAV_ITGB6	1.0783e-05	0	FN1_ITGAV_ITGB6	FN1 - (ITGAV+ITGB6)	FN1	ECM-Receptor	KEGG: hsa04512
Fibroblasts	CM	FN1	ITGAV_ITGB6	0.000107819	0	FN1_ITGAV_ITGB6	FN1 - (ITGAV+ITGB6)	FN1	ECM-Receptor	KEGG: hsa04512
Mural cells	CM	FN1	ITGAV_ITGB6	1.0783e-05	0	FN1_ITGAV_ITGB6	FN1 - (ITGAV+ITGB6)	FN1	ECM-Receptor	KEGG: hsa04512
Endocardial/lymphatic EC	CM	FN1	ITGAV_ITGB8	1.0783e-05	0	FN1_ITGAV_ITGB8	FN1 - (ITGAV+ITGB8)	FN1	ECM-Receptor	KEGG: hsa04512
Endothelial cells (baboon)	CM	FN1	ITGAV_ITGB8	1.0783e-05	0.02	FN1_ITGAV_ITGB8	FN1 - (ITGAV+ITGB8)	FN1	ECM-Receptor	KEGG: hsa04512
Fibroblasts	CM	FN1	ITGAV_ITGB8	0.000107819	0	FN1_ITGAV_ITGB8	FN1 - (ITGAV+ITGB8)	FN1	ECM-Receptor	KEGG: hsa04512
Mural cells	CM	FN1	ITGAV_ITGB8	1.0783e-05	0	FN1_ITGAV_ITGB8	FN1 - (ITGAV+ITGB8)	FN1	ECM-Receptor	KEGG: hsa04512
Endocardial/lymphatic EC	Neuronal cells	FN1	ITGAV_ITGB8	6.37932e-06	0	FN1_ITGAV_ITGB8	FN1 - (ITGAV+ITGB8)	FN1	ECM-Receptor	KEGG: hsa04512
Endothelial cells (baboon)	Neuronal cells	FN1	ITGAV_ITGB8	6.37932e-06	0.03	FN1_ITGAV_ITGB8	FN1 - (ITGAV+ITGB8)	FN1	ECM-Receptor	KEGG: hsa04512
Fibroblasts	Neuronal cells	FN1	ITGAV_ITGB8	6.37896e-05	0	FN1_ITGAV_ITGB8	FN1 - (ITGAV+ITGB8)	FN1	ECM-Receptor	KEGG: hsa04512
Mural cells	Neuronal cells	FN1	ITGAV_ITGB8	6.37932e-06	0	FN1_ITGAV_ITGB8	FN1 - (ITGAV+ITGB8)	FN1	ECM-Receptor	KEGG: hsa04512
CM	CM	LAMA4	ITGAV_ITGB8	4.31305e-05	0	LAMA4_ITGAV_ITGB8	LAMA4 - (ITGAV+ITGB8)	LAMININ	ECM-Receptor	KEGG: hsa04512
Endocardial/lymphatic EC	CM	LAMA4	ITGAV_ITGB8	0.000107819	0	LAMA4_ITGAV_ITGB8	LAMA4 - (ITGAV+ITGB8)	LAMININ	ECM-Receptor	KEGG: hsa04512
Fibroblasts	CM	LAMA4	ITGAV_ITGB8	4.31305e-05	0	LAMA4_ITGAV_ITGB8	LAMA4 - (ITGAV+ITGB8)	LAMININ	ECM-Receptor	KEGG: hsa04512
Vascular EC	CM	LAMA4	ITGAV_ITGB8	4.31305e-05	0	LAMA4_ITGAV_ITGB8	LAMA4 - (ITGAV+ITGB8)	LAMININ	ECM-Receptor	KEGG: hsa04512
Endocardial/lymphatic EC	Neuronal cells	LAMA4	ITGAV_ITGB8	6.37896e-05	0	LAMA4_ITGAV_ITGB8	LAMA4 - (ITGAV+ITGB8)	LAMININ	ECM-Receptor	KEGG: hsa04512
Endocardial/lymphatic EC	CM	LAMB1	ITGAV_ITGB8	1.0783e-05	0	LAMB1_ITGAV_ITGB8	LAMB1 - (ITGAV+ITGB8)	LAMININ	ECM-Receptor	KEGG: hsa04512
Fibroblasts	CM	LAMB1	ITGAV_ITGB8	5.39125e-05	0	LAMB1_ITGAV_ITGB8	LAMB1 - (ITGAV+ITGB8)	LAMININ	ECM-Receptor	KEGG: hsa04512
Mural cells	CM	LAMB1	ITGAV_ITGB8	1.0783e-05	0	LAMB1_ITGAV_ITGB8	LAMB1 - (ITGAV+ITGB8)	LAMININ	ECM-Receptor	KEGG: hsa04512
Neuronal cells	CM	LAMB1	ITGAV_ITGB8	1.0783e-05	0	LAMB1_ITGAV_ITGB8	LAMB1 - (ITGAV+ITGB8)	LAMININ	ECM-Receptor	KEGG: hsa04512
Vascular EC	CM	LAMB1	ITGAV_ITGB8	1.0783e-05	0	LAMB1_ITGAV_ITGB8	LAMB1 - (ITGAV+ITGB8)	LAMININ	ECM-Receptor	KEGG: hsa04512
Endocardial/lymphatic EC	Neuronal cells	LAMB1	ITGAV_ITGB8	6.37932e-06	0	LAMB1_ITGAV_ITGB8	LAMB1 - (ITGAV+ITGB8)	LAMININ	ECM-Receptor	KEGG: hsa04512
Fibroblasts	Neuronal cells	LAMB1	ITGAV_ITGB8	3.18958e-05	0	LAMB1_ITGAV_ITGB8	LAMB1 - (ITGAV+ITGB8)	LAMININ	ECM-Receptor	KEGG: hsa04512
Mural cells	Neuronal cells	LAMB1	ITGAV_ITGB8	6.37932e-06	0	LAMB1_ITGAV_ITGB8	LAMB1 - (ITGAV+ITGB8)	LAMININ	ECM-Receptor	KEGG: hsa04512
Neuronal cells	Neuronal cells	LAMB1	ITGAV_ITGB8	6.37932e-06	0	LAMB1_ITGAV_ITGB8	LAMB1 - (ITGAV+ITGB8)	LAMININ	ECM-Receptor	KEGG: hsa04512
Vascular EC	Neuronal cells	LAMB1	ITGAV_ITGB8	6.37932e-06	0	LAMB1_ITGAV_ITGB8	LAMB1 - (ITGAV+ITGB8)	LAMININ	ECM-Receptor	KEGG: hsa04512
CM	CM	LAMC1	ITGAV_ITGB8	4.31305e-05	0	LAMC1_ITGAV_ITGB8	LAMC1 - (ITGAV+ITGB8)	LAMININ	ECM-Receptor	KEGG: hsa04512
Endocardial/lymphatic EC	CM	LAMC1	ITGAV_ITGB8	5.39125e-05	0	LAMC1_ITGAV_ITGB8	LAMC1 - (ITGAV+ITGB8)	LAMININ	ECM-Receptor	KEGG: hsa04512
Fibroblasts	CM	LAMC1	ITGAV_ITGB8	0.000107819	0	LAMC1_ITGAV_ITGB8	LAMC1 - (ITGAV+ITGB8)	LAMININ	ECM-Receptor	KEGG: hsa04512
Mural cells	CM	LAMC1	ITGAV_ITGB8	4.31305e-05	0	LAMC1_ITGAV_ITGB8	LAMC1 - (ITGAV+ITGB8)	LAMININ	ECM-Receptor	KEGG: hsa04512
Neuronal cells	CM	LAMC1	ITGAV_ITGB8	4.31305e-05	0	LAMC1_ITGAV_ITGB8	LAMC1 - (ITGAV+ITGB8)	LAMININ	ECM-Receptor	KEGG: hsa04512
Fibroblasts	Neuronal cells	LAMC1	ITGAV_ITGB8	6.37896e-05	0	LAMC1_ITGAV_ITGB8	LAMC1 - (ITGAV+ITGB8)	LAMININ	ECM-Receptor	KEGG: hsa04512
Fibroblasts	CM	COL1A1	ITGAV_ITGB8	4.31305e-05	0	COL1A1_ITGAV_ITGB8	COL1A1 - (ITGAV+ITGB8)	COLLAGEN	ECM-Receptor	KEGG: hsa04512
Fibroblasts	Neuronal cells	COL1A1	ITGAV_ITGB8	2.55168e-05	0	COL1A1_ITGAV_ITGB8	COL1A1 - (ITGAV+ITGB8)	COLLAGEN	ECM-Receptor	KEGG: hsa04512
Fibroblasts	CM	COL1A2	ITGAV_ITGB8	5.39125e-05	0	COL1A2_ITGAV_ITGB8	COL1A2 - (ITGAV+ITGB8)	COLLAGEN	ECM-Receptor	KEGG: hsa04512
Mural cells	CM	COL1A2	ITGAV_ITGB8	1.0783e-05	0	COL1A2_ITGAV_ITGB8	COL1A2 - (ITGAV+ITGB8)	COLLAGEN	ECM-Receptor	KEGG: hsa04512
Fibroblasts	Neuronal cells	COL1A2	ITGAV_ITGB8	3.18958e-05	0	COL1A2_ITGAV_ITGB8	COL1A2 - (ITGAV+ITGB8)	COLLAGEN	ECM-Receptor	KEGG: hsa04512
Mural cells	Neuronal cells	COL1A2	ITGAV_ITGB8	6.37932e-06	0	COL1A2_ITGAV_ITGB8	COL1A2 - (ITGAV+ITGB8)	COLLAGEN	ECM-Receptor	KEGG: hsa04512
Endothelial cells (baboon)	CM	COL4A1	ITGAV_ITGB8	1.0783e-05	0	COL4A1_ITGAV_ITGB8	COL4A1 - (ITGAV+ITGB8)	COLLAGEN	ECM-Receptor	KEGG: hsa04512
Endothelial cells (baboon)	Neuronal cells	COL4A1	ITGAV_ITGB8	6.37932e-06	0	COL4A1_ITGAV_ITGB8	COL4A1 - (ITGAV+ITGB8)	COLLAGEN	ECM-Receptor	KEGG: hsa04512
CM	CM	COL4A2	ITGAV_ITGB8	4.31305e-05	0	COL4A2_ITGAV_ITGB8	COL4A2 - (ITGAV+ITGB8)	COLLAGEN	ECM-Receptor	KEGG: hsa04512
Endocardial/lymphatic EC	CM	COL4A2	ITGAV_ITGB8	5.39125e-05	0	COL4A2_ITGAV_ITGB8	COL4A2 - (ITGAV+ITGB8)	COLLAGEN	ECM-Receptor	KEGG: hsa04512
Fibroblasts	CM	COL4A2	ITGAV_ITGB8	0.000107819	0	COL4A2_ITGAV_ITGB8	COL4A2 - (ITGAV+ITGB8)	COLLAGEN	ECM-Receptor	KEGG: hsa04512
Mural cells	CM	COL4A2	ITGAV_ITGB8	9.70384e-05	0	COL4A2_ITGAV_ITGB8	COL4A2 - (ITGAV+ITGB8)	COLLAGEN	ECM-Receptor	KEGG: hsa04512
Neuronal cells	CM	COL4A2	ITGAV_ITGB8	3.23482e-05	0	COL4A2_ITGAV_ITGB8	COL4A2 - (ITGAV+ITGB8)	COLLAGEN	ECM-Receptor	KEGG: hsa04512
Vascular EC	CM	COL4A2	ITGAV_ITGB8	5.39125e-05	0	COL4A2_ITGAV_ITGB8	COL4A2 - (ITGAV+ITGB8)	COLLAGEN	ECM-Receptor	KEGG: hsa04512
Fibroblasts	Neuronal cells	COL4A2	ITGAV_ITGB8	6.37896e-05	0	COL4A2_ITGAV_ITGB8	COL4A2 - (ITGAV+ITGB8)	COLLAGEN	ECM-Receptor	KEGG: hsa04512
Mural cells	Neuronal cells	COL4A2	ITGAV_ITGB8	5.7411e-05	0	COL4A2_ITGAV_ITGB8	COL4A2 - (ITGAV+ITGB8)	COLLAGEN	ECM-Receptor	KEGG: hsa04512
CM	CM	COL4A5	ITGAV_ITGB8	1.0783e-05	0	COL4A5_ITGAV_ITGB8	COL4A5 - (ITGAV+ITGB8)	COLLAGEN	ECM-Receptor	KEGG: hsa04512
CM	Neuronal cells	COL4A5	ITGAV_ITGB8	6.37932e-06	0	COL4A5_ITGAV_ITGB8	COL4A5 - (ITGAV+ITGB8)	COLLAGEN	ECM-Receptor	KEGG: hsa04512
Fibroblasts	CM	COL6A1	ITGAV_ITGB8	1.0783e-05	0	COL6A1_ITGAV_ITGB8	COL6A1 - (ITGAV+ITGB8)	COLLAGEN	ECM-Receptor	KEGG: hsa04512
Fibroblasts	Neuronal cells	COL6A1	ITGAV_ITGB8	6.37932e-06	0	COL6A1_ITGAV_ITGB8	COL6A1 - (ITGAV+ITGB8)	COLLAGEN	ECM-Receptor	KEGG: hsa04512
Fibroblasts	CM	COL6A2	ITGAV_ITGB8	1.0783e-05	0	COL6A2_ITGAV_ITGB8	COL6A2 - (ITGAV+ITGB8)	COLLAGEN	ECM-Receptor	KEGG: hsa04512
Fibroblasts	Neuronal cells	COL6A2	ITGAV_ITGB8	6.37932e-06	0	COL6A2_ITGAV_ITGB8	COL6A2 - (ITGAV+ITGB8)	COLLAGEN	ECM-Receptor	KEGG: hsa04512
Fibroblasts	CM	COL6A3	ITGAV_ITGB8	8.62573e-05	0	COL6A3_ITGAV_ITGB8	COL6A3 - (ITGAV+ITGB8)	COLLAGEN	ECM-Receptor	KEGG: hsa04512
Mural cells	CM	COL6A3	ITGAV_ITGB8	1.0783e-05	0	COL6A3_ITGAV_ITGB8	COL6A3 - (ITGAV+ITGB8)	COLLAGEN	ECM-Receptor	KEGG: hsa04512
Fibroblasts	Neuronal cells	COL6A3	ITGAV_ITGB8	5.10323e-05	0	COL6A3_ITGAV_ITGB8	COL6A3 - (ITGAV+ITGB8)	COLLAGEN	ECM-Receptor	KEGG: hsa04512
Mural cells	Neuronal cells	COL6A3	ITGAV_ITGB8	6.37932e-06	0	COL6A3_ITGAV_ITGB8	COL6A3 - (ITGAV+ITGB8)	COLLAGEN	ECM-Receptor	KEGG: hsa04512
Endocardial/lymphatic EC	CM	FN1	CD44	4.82232e-06	0	FN1_CD44	FN1 - CD44	FN1	ECM-Receptor	KEGG: hsa04512
Endothelial cells (baboon)	CM	FN1	CD44	4.82232e-06	0.03	FN1_CD44	FN1 - CD44	FN1	ECM-Receptor	KEGG: hsa04512
Fibroblasts	CM	FN1	CD44	4.82211e-05	0	FN1_CD44	FN1 - CD44	FN1	ECM-Receptor	KEGG: hsa04512
Mural cells	CM	FN1	CD44	4.82232e-06	0	FN1_CD44	FN1 - CD44	FN1	ECM-Receptor	KEGG: hsa04512
Endocardial/lymphatic EC	Endothelial cells (baboon)	FN1	CD44	4.82232e-06	0	FN1_CD44	FN1 - CD44	FN1	ECM-Receptor	KEGG: hsa04512
Fibroblasts	Endothelial cells (baboon)	FN1	CD44	4.82211e-05	0	FN1_CD44	FN1 - CD44	FN1	ECM-Receptor	KEGG: hsa04512
Mural cells	Endothelial cells (baboon)	FN1	CD44	4.82232e-06	0	FN1_CD44	FN1 - CD44	FN1	ECM-Receptor	KEGG: hsa04512
Endocardial/lymphatic EC	Lymphoids (baboon)	FN1	CD44	4.82232e-06	0	FN1_CD44	FN1 - CD44	FN1	ECM-Receptor	KEGG: hsa04512
Endothelial cells (baboon)	Lymphoids (baboon)	FN1	CD44	4.82232e-06	0.03	FN1_CD44	FN1 - CD44	FN1	ECM-Receptor	KEGG: hsa04512
Fibroblasts	Lymphoids (baboon)	FN1	CD44	4.82211e-05	0	FN1_CD44	FN1 - CD44	FN1	ECM-Receptor	KEGG: hsa04512
Mural cells	Lymphoids (baboon)	FN1	CD44	4.82232e-06	0	FN1_CD44	FN1 - CD44	FN1	ECM-Receptor	KEGG: hsa04512
Endocardial/lymphatic EC	Mast cells (baboon)	FN1	CD44	4.82232e-06	0	FN1_CD44	FN1 - CD44	FN1	ECM-Receptor	KEGG: hsa04512
Endothelial cells (baboon)	Mast cells (baboon)	FN1	CD44	4.82232e-06	0.01	FN1_CD44	FN1 - CD44	FN1	ECM-Receptor	KEGG: hsa04512
Fibroblasts	Mast cells (baboon)	FN1	CD44	4.82211e-05	0	FN1_CD44	FN1 - CD44	FN1	ECM-Receptor	KEGG: hsa04512
Mural cells	Mast cells (baboon)	FN1	CD44	4.82232e-06	0	FN1_CD44	FN1 - CD44	FN1	ECM-Receptor	KEGG: hsa04512
Endocardial/lymphatic EC	Myeloids (baboon)	FN1	CD44	4.82232e-06	0	FN1_CD44	FN1 - CD44	FN1	ECM-Receptor	KEGG: hsa04512
Endothelial cells (baboon)	Myeloids (baboon)	FN1	CD44	4.82232e-06	0.03	FN1_CD44	FN1 - CD44	FN1	ECM-Receptor	KEGG: hsa04512
Fibroblasts	Myeloids (baboon)	FN1	CD44	4.82211e-05	0	FN1_CD44	FN1 - CD44	FN1	ECM-Receptor	KEGG: hsa04512
Mural cells	Myeloids (baboon)	FN1	CD44	4.82232e-06	0	FN1_CD44	FN1 - CD44	FN1	ECM-Receptor	KEGG: hsa04512
Endocardial/lymphatic EC	Neuronal cells	FN1	CD44	2.41117e-06	0	FN1_CD44	FN1 - CD44	FN1	ECM-Receptor	KEGG: hsa04512
Fibroblasts	Neuronal cells	FN1	CD44	2.41111e-05	0	FN1_CD44	FN1 - CD44	FN1	ECM-Receptor	KEGG: hsa04512
Mural cells	Neuronal cells	FN1	CD44	2.41117e-06	0	FN1_CD44	FN1 - CD44	FN1	ECM-Receptor	KEGG: hsa04512
Endocardial/lymphatic EC	Resident Immune	FN1	CD44	4.82232e-06	0	FN1_CD44	FN1 - CD44	FN1	ECM-Receptor	KEGG: hsa04512
Endothelial cells (baboon)	Resident Immune	FN1	CD44	4.82232e-06	0.03	FN1_CD44	FN1 - CD44	FN1	ECM-Receptor	KEGG: hsa04512
Fibroblasts	Resident Immune	FN1	CD44	4.82211e-05	0	FN1_CD44	FN1 - CD44	FN1	ECM-Receptor	KEGG: hsa04512
Mural cells	Resident Immune	FN1	CD44	4.82232e-06	0	FN1_CD44	FN1 - CD44	FN1	ECM-Receptor	KEGG: hsa04512
Fibroblasts	CM	COL1A1	CD44	1.9289e-05	0	COL1A1_CD44	COL1A1 - CD44	COLLAGEN	ECM-Receptor	KEGG: hsa04512
Fibroblasts	Endothelial cells (baboon)	COL1A1	CD44	1.9289e-05	0	COL1A1_CD44	COL1A1 - CD44	COLLAGEN	ECM-Receptor	KEGG: hsa04512
Fibroblasts	Lymphoids (baboon)	COL1A1	CD44	1.9289e-05	0	COL1A1_CD44	COL1A1 - CD44	COLLAGEN	ECM-Receptor	KEGG: hsa04512
Fibroblasts	Mast cells (baboon)	COL1A1	CD44	1.9289e-05	0	COL1A1_CD44	COL1A1 - CD44	COLLAGEN	ECM-Receptor	KEGG: hsa04512
Fibroblasts	Myeloids (baboon)	COL1A1	CD44	1.9289e-05	0	COL1A1_CD44	COL1A1 - CD44	COLLAGEN	ECM-Receptor	KEGG: hsa04512
Fibroblasts	Neuronal cells	COL1A1	CD44	9.6446e-06	0	COL1A1_CD44	COL1A1 - CD44	COLLAGEN	ECM-Receptor	KEGG: hsa04512
Fibroblasts	Resident Immune	COL1A1	CD44	1.9289e-05	0	COL1A1_CD44	COL1A1 - CD44	COLLAGEN	ECM-Receptor	KEGG: hsa04512
Fibroblasts	CM	COL1A2	CD44	2.41111e-05	0	COL1A2_CD44	COL1A2 - CD44	COLLAGEN	ECM-Receptor	KEGG: hsa04512
Mural cells	CM	COL1A2	CD44	4.82232e-06	0	COL1A2_CD44	COL1A2 - CD44	COLLAGEN	ECM-Receptor	KEGG: hsa04512
Fibroblasts	Endothelial cells (baboon)	COL1A2	CD44	2.41111e-05	0	COL1A2_CD44	COL1A2 - CD44	COLLAGEN	ECM-Receptor	KEGG: hsa04512
Mural cells	Endothelial cells (baboon)	COL1A2	CD44	4.82232e-06	0	COL1A2_CD44	COL1A2 - CD44	COLLAGEN	ECM-Receptor	KEGG: hsa04512
Fibroblasts	Lymphoids (baboon)	COL1A2	CD44	2.41111e-05	0	COL1A2_CD44	COL1A2 - CD44	COLLAGEN	ECM-Receptor	KEGG: hsa04512
Mural cells	Lymphoids (baboon)	COL1A2	CD44	4.82232e-06	0	COL1A2_CD44	COL1A2 - CD44	COLLAGEN	ECM-Receptor	KEGG: hsa04512
Fibroblasts	Mast cells (baboon)	COL1A2	CD44	2.41111e-05	0	COL1A2_CD44	COL1A2 - CD44	COLLAGEN	ECM-Receptor	KEGG: hsa04512
Mural cells	Mast cells (baboon)	COL1A2	CD44	4.82232e-06	0	COL1A2_CD44	COL1A2 - CD44	COLLAGEN	ECM-Receptor	KEGG: hsa04512
Fibroblasts	Myeloids (baboon)	COL1A2	CD44	2.41111e-05	0	COL1A2_CD44	COL1A2 - CD44	COLLAGEN	ECM-Receptor	KEGG: hsa04512
Mural cells	Myeloids (baboon)	COL1A2	CD44	4.82232e-06	0	COL1A2_CD44	COL1A2 - CD44	COLLAGEN	ECM-Receptor	KEGG: hsa04512
Fibroblasts	Neuronal cells	COL1A2	CD44	1.20557e-05	0	COL1A2_CD44	COL1A2 - CD44	COLLAGEN	ECM-Receptor	KEGG: hsa04512
Mural cells	Neuronal cells	COL1A2	CD44	2.41117e-06	0	COL1A2_CD44	COL1A2 - CD44	COLLAGEN	ECM-Receptor	KEGG: hsa04512
Fibroblasts	Resident Immune	COL1A2	CD44	2.41111e-05	0	COL1A2_CD44	COL1A2 - CD44	COLLAGEN	ECM-Receptor	KEGG: hsa04512
Mural cells	Resident Immune	COL1A2	CD44	4.82232e-06	0	COL1A2_CD44	COL1A2 - CD44	COLLAGEN	ECM-Receptor	KEGG: hsa04512
Endothelial cells (baboon)	CM	COL4A1	CD44	4.82232e-06	0	COL4A1_CD44	COL4A1 - CD44	COLLAGEN	ECM-Receptor	KEGG: hsa04512
Endothelial cells (baboon)	Endothelial cells (baboon)	COL4A1	CD44	4.82232e-06	0	COL4A1_CD44	COL4A1 - CD44	COLLAGEN	ECM-Receptor	KEGG: hsa04512
Endothelial cells (baboon)	Lymphoids (baboon)	COL4A1	CD44	4.82232e-06	0	COL4A1_CD44	COL4A1 - CD44	COLLAGEN	ECM-Receptor	KEGG: hsa04512
Endothelial cells (baboon)	Mast cells (baboon)	COL4A1	CD44	4.82232e-06	0	COL4A1_CD44	COL4A1 - CD44	COLLAGEN	ECM-Receptor	KEGG: hsa04512
Endothelial cells (baboon)	Myeloids (baboon)	COL4A1	CD44	4.82232e-06	0	COL4A1_CD44	COL4A1 - CD44	COLLAGEN	ECM-Receptor	KEGG: hsa04512
Endothelial cells (baboon)	Neuronal cells	COL4A1	CD44	2.41117e-06	0	COL4A1_CD44	COL4A1 - CD44	COLLAGEN	ECM-Receptor	KEGG: hsa04512
Endothelial cells (baboon)	Resident Immune	COL4A1	CD44	4.82232e-06	0	COL4A1_CD44	COL4A1 - CD44	COLLAGEN	ECM-Receptor	KEGG: hsa04512
CM	CM	COL4A2	CD44	1.9289e-05	0	COL4A2_CD44	COL4A2 - CD44	COLLAGEN	ECM-Receptor	KEGG: hsa04512
Endocardial/lymphatic EC	CM	COL4A2	CD44	2.41111e-05	0	COL4A2_CD44	COL4A2 - CD44	COLLAGEN	ECM-Receptor	KEGG: hsa04512
Fibroblasts	CM	COL4A2	CD44	4.82211e-05	0	COL4A2_CD44	COL4A2 - CD44	COLLAGEN	ECM-Receptor	KEGG: hsa04512
Mural cells	CM	COL4A2	CD44	4.33992e-05	0	COL4A2_CD44	COL4A2 - CD44	COLLAGEN	ECM-Receptor	KEGG: hsa04512
Vascular EC	CM	COL4A2	CD44	2.41111e-05	0	COL4A2_CD44	COL4A2 - CD44	COLLAGEN	ECM-Receptor	KEGG: hsa04512
Mural cells	Endothelial cells (baboon)	COL4A2	CD44	4.33992e-05	0.04	COL4A2_CD44	COL4A2 - CD44	COLLAGEN	ECM-Receptor	KEGG: hsa04512
CM	Lymphoids (baboon)	COL4A2	CD44	1.9289e-05	0	COL4A2_CD44	COL4A2 - CD44	COLLAGEN	ECM-Receptor	KEGG: hsa04512
Endocardial/lymphatic EC	Lymphoids (baboon)	COL4A2	CD44	2.41111e-05	0	COL4A2_CD44	COL4A2 - CD44	COLLAGEN	ECM-Receptor	KEGG: hsa04512
Fibroblasts	Lymphoids (baboon)	COL4A2	CD44	4.82211e-05	0	COL4A2_CD44	COL4A2 - CD44	COLLAGEN	ECM-Receptor	KEGG: hsa04512
Mural cells	Lymphoids (baboon)	COL4A2	CD44	4.33992e-05	0	COL4A2_CD44	COL4A2 - CD44	COLLAGEN	ECM-Receptor	KEGG: hsa04512
Vascular EC	Lymphoids (baboon)	COL4A2	CD44	2.41111e-05	0	COL4A2_CD44	COL4A2 - CD44	COLLAGEN	ECM-Receptor	KEGG: hsa04512
CM	Mast cells (baboon)	COL4A2	CD44	1.9289e-05	0.02	COL4A2_CD44	COL4A2 - CD44	COLLAGEN	ECM-Receptor	KEGG: hsa04512
Endocardial/lymphatic EC	Mast cells (baboon)	COL4A2	CD44	2.41111e-05	0	COL4A2_CD44	COL4A2 - CD44	COLLAGEN	ECM-Receptor	KEGG: hsa04512
Fibroblasts	Mast cells (baboon)	COL4A2	CD44	4.82211e-05	0	COL4A2_CD44	COL4A2 - CD44	COLLAGEN	ECM-Receptor	KEGG: hsa04512
Mural cells	Mast cells (baboon)	COL4A2	CD44	4.33992e-05	0	COL4A2_CD44	COL4A2 - CD44	COLLAGEN	ECM-Receptor	KEGG: hsa04512
Vascular EC	Mast cells (baboon)	COL4A2	CD44	2.41111e-05	0	COL4A2_CD44	COL4A2 - CD44	COLLAGEN	ECM-Receptor	KEGG: hsa04512
CM	Myeloids (baboon)	COL4A2	CD44	1.9289e-05	0	COL4A2_CD44	COL4A2 - CD44	COLLAGEN	ECM-Receptor	KEGG: hsa04512
Endocardial/lymphatic EC	Myeloids (baboon)	COL4A2	CD44	2.41111e-05	0	COL4A2_CD44	COL4A2 - CD44	COLLAGEN	ECM-Receptor	KEGG: hsa04512
Fibroblasts	Myeloids (baboon)	COL4A2	CD44	4.82211e-05	0	COL4A2_CD44	COL4A2 - CD44	COLLAGEN	ECM-Receptor	KEGG: hsa04512
Mural cells	Myeloids (baboon)	COL4A2	CD44	4.33992e-05	0	COL4A2_CD44	COL4A2 - CD44	COLLAGEN	ECM-Receptor	KEGG: hsa04512
Vascular EC	Myeloids (baboon)	COL4A2	CD44	2.41111e-05	0	COL4A2_CD44	COL4A2 - CD44	COLLAGEN	ECM-Receptor	KEGG: hsa04512
Fibroblasts	Neuronal cells	COL4A2	CD44	2.41111e-05	0	COL4A2_CD44	COL4A2 - CD44	COLLAGEN	ECM-Receptor	KEGG: hsa04512
Mural cells	Neuronal cells	COL4A2	CD44	2.17001e-05	0	COL4A2_CD44	COL4A2 - CD44	COLLAGEN	ECM-Receptor	KEGG: hsa04512
CM	Resident Immune	COL4A2	CD44	1.9289e-05	0	COL4A2_CD44	COL4A2 - CD44	COLLAGEN	ECM-Receptor	KEGG: hsa04512
Endocardial/lymphatic EC	Resident Immune	COL4A2	CD44	2.41111e-05	0	COL4A2_CD44	COL4A2 - CD44	COLLAGEN	ECM-Receptor	KEGG: hsa04512
Fibroblasts	Resident Immune	COL4A2	CD44	4.82211e-05	0	COL4A2_CD44	COL4A2 - CD44	COLLAGEN	ECM-Receptor	KEGG: hsa04512
Mural cells	Resident Immune	COL4A2	CD44	4.33992e-05	0	COL4A2_CD44	COL4A2 - CD44	COLLAGEN	ECM-Receptor	KEGG: hsa04512
Vascular EC	Resident Immune	COL4A2	CD44	2.41111e-05	0	COL4A2_CD44	COL4A2 - CD44	COLLAGEN	ECM-Receptor	KEGG: hsa04512
CM	CM	COL4A5	CD44	4.82232e-06	0	COL4A5_CD44	COL4A5 - CD44	COLLAGEN	ECM-Receptor	KEGG: hsa04512
CM	Endothelial cells (baboon)	COL4A5	CD44	4.82232e-06	0	COL4A5_CD44	COL4A5 - CD44	COLLAGEN	ECM-Receptor	KEGG: hsa04512
CM	Lymphoids (baboon)	COL4A5	CD44	4.82232e-06	0	COL4A5_CD44	COL4A5 - CD44	COLLAGEN	ECM-Receptor	KEGG: hsa04512
CM	Mast cells (baboon)	COL4A5	CD44	4.82232e-06	0	COL4A5_CD44	COL4A5 - CD44	COLLAGEN	ECM-Receptor	KEGG: hsa04512
CM	Myeloids (baboon)	COL4A5	CD44	4.82232e-06	0	COL4A5_CD44	COL4A5 - CD44	COLLAGEN	ECM-Receptor	KEGG: hsa04512
CM	Neuronal cells	COL4A5	CD44	2.41117e-06	0	COL4A5_CD44	COL4A5 - CD44	COLLAGEN	ECM-Receptor	KEGG: hsa04512
CM	Resident Immune	COL4A5	CD44	4.82232e-06	0	COL4A5_CD44	COL4A5 - CD44	COLLAGEN	ECM-Receptor	KEGG: hsa04512
Fibroblasts	CM	COL6A1	CD44	4.82232e-06	0	COL6A1_CD44	COL6A1 - CD44	COLLAGEN	ECM-Receptor	KEGG: hsa04512
Fibroblasts	Endothelial cells (baboon)	COL6A1	CD44	4.82232e-06	0	COL6A1_CD44	COL6A1 - CD44	COLLAGEN	ECM-Receptor	KEGG: hsa04512
Fibroblasts	Lymphoids (baboon)	COL6A1	CD44	4.82232e-06	0	COL6A1_CD44	COL6A1 - CD44	COLLAGEN	ECM-Receptor	KEGG: hsa04512
Fibroblasts	Mast cells (baboon)	COL6A1	CD44	4.82232e-06	0	COL6A1_CD44	COL6A1 - CD44	COLLAGEN	ECM-Receptor	KEGG: hsa04512
Fibroblasts	Myeloids (baboon)	COL6A1	CD44	4.82232e-06	0	COL6A1_CD44	COL6A1 - CD44	COLLAGEN	ECM-Receptor	KEGG: hsa04512
Fibroblasts	Neuronal cells	COL6A1	CD44	2.41117e-06	0	COL6A1_CD44	COL6A1 - CD44	COLLAGEN	ECM-Receptor	KEGG: hsa04512
Fibroblasts	Resident Immune	COL6A1	CD44	4.82232e-06	0	COL6A1_CD44	COL6A1 - CD44	COLLAGEN	ECM-Receptor	KEGG: hsa04512
Fibroblasts	CM	COL6A2	CD44	4.82232e-06	0	COL6A2_CD44	COL6A2 - CD44	COLLAGEN	ECM-Receptor	KEGG: hsa04512
Fibroblasts	Endothelial cells (baboon)	COL6A2	CD44	4.82232e-06	0	COL6A2_CD44	COL6A2 - CD44	COLLAGEN	ECM-Receptor	KEGG: hsa04512
Fibroblasts	Lymphoids (baboon)	COL6A2	CD44	4.82232e-06	0	COL6A2_CD44	COL6A2 - CD44	COLLAGEN	ECM-Receptor	KEGG: hsa04512
Fibroblasts	Mast cells (baboon)	COL6A2	CD44	4.82232e-06	0	COL6A2_CD44	COL6A2 - CD44	COLLAGEN	ECM-Receptor	KEGG: hsa04512
Fibroblasts	Myeloids (baboon)	COL6A2	CD44	4.82232e-06	0	COL6A2_CD44	COL6A2 - CD44	COLLAGEN	ECM-Receptor	KEGG: hsa04512
Fibroblasts	Neuronal cells	COL6A2	CD44	2.41117e-06	0	COL6A2_CD44	COL6A2 - CD44	COLLAGEN	ECM-Receptor	KEGG: hsa04512
Fibroblasts	Resident Immune	COL6A2	CD44	4.82232e-06	0	COL6A2_CD44	COL6A2 - CD44	COLLAGEN	ECM-Receptor	KEGG: hsa04512
Fibroblasts	CM	COL6A3	CD44	3.85773e-05	0	COL6A3_CD44	COL6A3 - CD44	COLLAGEN	ECM-Receptor	KEGG: hsa04512
Mural cells	CM	COL6A3	CD44	4.82232e-06	0	COL6A3_CD44	COL6A3 - CD44	COLLAGEN	ECM-Receptor	KEGG: hsa04512
Fibroblasts	Endothelial cells (baboon)	COL6A3	CD44	3.85773e-05	0	COL6A3_CD44	COL6A3 - CD44	COLLAGEN	ECM-Receptor	KEGG: hsa04512
Mural cells	Endothelial cells (baboon)	COL6A3	CD44	4.82232e-06	0	COL6A3_CD44	COL6A3 - CD44	COLLAGEN	ECM-Receptor	KEGG: hsa04512
Fibroblasts	Lymphoids (baboon)	COL6A3	CD44	3.85773e-05	0	COL6A3_CD44	COL6A3 - CD44	COLLAGEN	ECM-Receptor	KEGG: hsa04512
Mural cells	Lymphoids (baboon)	COL6A3	CD44	4.82232e-06	0	COL6A3_CD44	COL6A3 - CD44	COLLAGEN	ECM-Receptor	KEGG: hsa04512
Fibroblasts	Mast cells (baboon)	COL6A3	CD44	3.85773e-05	0	COL6A3_CD44	COL6A3 - CD44	COLLAGEN	ECM-Receptor	KEGG: hsa04512
Mural cells	Mast cells (baboon)	COL6A3	CD44	4.82232e-06	0	COL6A3_CD44	COL6A3 - CD44	COLLAGEN	ECM-Receptor	KEGG: hsa04512
Fibroblasts	Myeloids (baboon)	COL6A3	CD44	3.85773e-05	0	COL6A3_CD44	COL6A3 - CD44	COLLAGEN	ECM-Receptor	KEGG: hsa04512
Mural cells	Myeloids (baboon)	COL6A3	CD44	4.82232e-06	0	COL6A3_CD44	COL6A3 - CD44	COLLAGEN	ECM-Receptor	KEGG: hsa04512
Fibroblasts	Neuronal cells	COL6A3	CD44	1.9289e-05	0	COL6A3_CD44	COL6A3 - CD44	COLLAGEN	ECM-Receptor	KEGG: hsa04512
Mural cells	Neuronal cells	COL6A3	CD44	2.41117e-06	0	COL6A3_CD44	COL6A3 - CD44	COLLAGEN	ECM-Receptor	KEGG: hsa04512
Fibroblasts	Resident Immune	COL6A3	CD44	3.85773e-05	0	COL6A3_CD44	COL6A3 - CD44	COLLAGEN	ECM-Receptor	KEGG: hsa04512
Mural cells	Resident Immune	COL6A3	CD44	4.82232e-06	0	COL6A3_CD44	COL6A3 - CD44	COLLAGEN	ECM-Receptor	KEGG: hsa04512
CM	CM	LAMA4	CD44	1.9289e-05	0	LAMA4_CD44	LAMA4 - CD44	LAMININ	ECM-Receptor	KEGG: hsa04512
Endocardial/lymphatic EC	CM	LAMA4	CD44	4.82211e-05	0	LAMA4_CD44	LAMA4 - CD44	LAMININ	ECM-Receptor	KEGG: hsa04512
Fibroblasts	CM	LAMA4	CD44	1.9289e-05	0	LAMA4_CD44	LAMA4 - CD44	LAMININ	ECM-Receptor	KEGG: hsa04512
Vascular EC	CM	LAMA4	CD44	1.9289e-05	0	LAMA4_CD44	LAMA4 - CD44	LAMININ	ECM-Receptor	KEGG: hsa04512
CM	Lymphoids (baboon)	LAMA4	CD44	1.9289e-05	0	LAMA4_CD44	LAMA4 - CD44	LAMININ	ECM-Receptor	KEGG: hsa04512
Endocardial/lymphatic EC	Lymphoids (baboon)	LAMA4	CD44	4.82211e-05	0	LAMA4_CD44	LAMA4 - CD44	LAMININ	ECM-Receptor	KEGG: hsa04512
Fibroblasts	Lymphoids (baboon)	LAMA4	CD44	1.9289e-05	0	LAMA4_CD44	LAMA4 - CD44	LAMININ	ECM-Receptor	KEGG: hsa04512
Vascular EC	Lymphoids (baboon)	LAMA4	CD44	1.9289e-05	0	LAMA4_CD44	LAMA4 - CD44	LAMININ	ECM-Receptor	KEGG: hsa04512
CM	Mast cells (baboon)	LAMA4	CD44	1.9289e-05	0.02	LAMA4_CD44	LAMA4 - CD44	LAMININ	ECM-Receptor	KEGG: hsa04512
Endocardial/lymphatic EC	Mast cells (baboon)	LAMA4	CD44	4.82211e-05	0	LAMA4_CD44	LAMA4 - CD44	LAMININ	ECM-Receptor	KEGG: hsa04512
Fibroblasts	Mast cells (baboon)	LAMA4	CD44	1.9289e-05	0.02	LAMA4_CD44	LAMA4 - CD44	LAMININ	ECM-Receptor	KEGG: hsa04512
Vascular EC	Mast cells (baboon)	LAMA4	CD44	1.9289e-05	0.02	LAMA4_CD44	LAMA4 - CD44	LAMININ	ECM-Receptor	KEGG: hsa04512
CM	Myeloids (baboon)	LAMA4	CD44	1.9289e-05	0	LAMA4_CD44	LAMA4 - CD44	LAMININ	ECM-Receptor	KEGG: hsa04512
Endocardial/lymphatic EC	Myeloids (baboon)	LAMA4	CD44	4.82211e-05	0	LAMA4_CD44	LAMA4 - CD44	LAMININ	ECM-Receptor	KEGG: hsa04512
Fibroblasts	Myeloids (baboon)	LAMA4	CD44	1.9289e-05	0	LAMA4_CD44	LAMA4 - CD44	LAMININ	ECM-Receptor	KEGG: hsa04512
Vascular EC	Myeloids (baboon)	LAMA4	CD44	1.9289e-05	0	LAMA4_CD44	LAMA4 - CD44	LAMININ	ECM-Receptor	KEGG: hsa04512
Endocardial/lymphatic EC	Neuronal cells	LAMA4	CD44	2.41111e-05	0	LAMA4_CD44	LAMA4 - CD44	LAMININ	ECM-Receptor	KEGG: hsa04512
CM	Resident Immune	LAMA4	CD44	1.9289e-05	0	LAMA4_CD44	LAMA4 - CD44	LAMININ	ECM-Receptor	KEGG: hsa04512
Endocardial/lymphatic EC	Resident Immune	LAMA4	CD44	4.82211e-05	0	LAMA4_CD44	LAMA4 - CD44	LAMININ	ECM-Receptor	KEGG: hsa04512
Fibroblasts	Resident Immune	LAMA4	CD44	1.9289e-05	0	LAMA4_CD44	LAMA4 - CD44	LAMININ	ECM-Receptor	KEGG: hsa04512
Vascular EC	Resident Immune	LAMA4	CD44	1.9289e-05	0	LAMA4_CD44	LAMA4 - CD44	LAMININ	ECM-Receptor	KEGG: hsa04512
Endocardial/lymphatic EC	CM	LAMB1	CD44	4.82232e-06	0	LAMB1_CD44	LAMB1 - CD44	LAMININ	ECM-Receptor	KEGG: hsa04512
Fibroblasts	CM	LAMB1	CD44	2.41111e-05	0	LAMB1_CD44	LAMB1 - CD44	LAMININ	ECM-Receptor	KEGG: hsa04512
Mural cells	CM	LAMB1	CD44	4.82232e-06	0	LAMB1_CD44	LAMB1 - CD44	LAMININ	ECM-Receptor	KEGG: hsa04512
Neuronal cells	CM	LAMB1	CD44	4.82232e-06	0	LAMB1_CD44	LAMB1 - CD44	LAMININ	ECM-Receptor	KEGG: hsa04512
Vascular EC	CM	LAMB1	CD44	4.82232e-06	0	LAMB1_CD44	LAMB1 - CD44	LAMININ	ECM-Receptor	KEGG: hsa04512
Endocardial/lymphatic EC	Endothelial cells (baboon)	LAMB1	CD44	4.82232e-06	0	LAMB1_CD44	LAMB1 - CD44	LAMININ	ECM-Receptor	KEGG: hsa04512
Fibroblasts	Endothelial cells (baboon)	LAMB1	CD44	2.41111e-05	0	LAMB1_CD44	LAMB1 - CD44	LAMININ	ECM-Receptor	KEGG: hsa04512
Mural cells	Endothelial cells (baboon)	LAMB1	CD44	4.82232e-06	0	LAMB1_CD44	LAMB1 - CD44	LAMININ	ECM-Receptor	KEGG: hsa04512
Neuronal cells	Endothelial cells (baboon)	LAMB1	CD44	4.82232e-06	0	LAMB1_CD44	LAMB1 - CD44	LAMININ	ECM-Receptor	KEGG: hsa04512
Vascular EC	Endothelial cells (baboon)	LAMB1	CD44	4.82232e-06	0	LAMB1_CD44	LAMB1 - CD44	LAMININ	ECM-Receptor	KEGG: hsa04512
Endocardial/lymphatic EC	Lymphoids (baboon)	LAMB1	CD44	4.82232e-06	0	LAMB1_CD44	LAMB1 - CD44	LAMININ	ECM-Receptor	KEGG: hsa04512
Fibroblasts	Lymphoids (baboon)	LAMB1	CD44	2.41111e-05	0	LAMB1_CD44	LAMB1 - CD44	LAMININ	ECM-Receptor	KEGG: hsa04512
Mural cells	Lymphoids (baboon)	LAMB1	CD44	4.82232e-06	0	LAMB1_CD44	LAMB1 - CD44	LAMININ	ECM-Receptor	KEGG: hsa04512
Neuronal cells	Lymphoids (baboon)	LAMB1	CD44	4.82232e-06	0	LAMB1_CD44	LAMB1 - CD44	LAMININ	ECM-Receptor	KEGG: hsa04512
Vascular EC	Lymphoids (baboon)	LAMB1	CD44	4.82232e-06	0	LAMB1_CD44	LAMB1 - CD44	LAMININ	ECM-Receptor	KEGG: hsa04512
Endocardial/lymphatic EC	Mast cells (baboon)	LAMB1	CD44	4.82232e-06	0	LAMB1_CD44	LAMB1 - CD44	LAMININ	ECM-Receptor	KEGG: hsa04512
Fibroblasts	Mast cells (baboon)	LAMB1	CD44	2.41111e-05	0	LAMB1_CD44	LAMB1 - CD44	LAMININ	ECM-Receptor	KEGG: hsa04512
Mural cells	Mast cells (baboon)	LAMB1	CD44	4.82232e-06	0	LAMB1_CD44	LAMB1 - CD44	LAMININ	ECM-Receptor	KEGG: hsa04512
Neuronal cells	Mast cells (baboon)	LAMB1	CD44	4.82232e-06	0	LAMB1_CD44	LAMB1 - CD44	LAMININ	ECM-Receptor	KEGG: hsa04512
Vascular EC	Mast cells (baboon)	LAMB1	CD44	4.82232e-06	0	LAMB1_CD44	LAMB1 - CD44	LAMININ	ECM-Receptor	KEGG: hsa04512
Endocardial/lymphatic EC	Myeloids (baboon)	LAMB1	CD44	4.82232e-06	0	LAMB1_CD44	LAMB1 - CD44	LAMININ	ECM-Receptor	KEGG: hsa04512
Fibroblasts	Myeloids (baboon)	LAMB1	CD44	2.41111e-05	0	LAMB1_CD44	LAMB1 - CD44	LAMININ	ECM-Receptor	KEGG: hsa04512
Mural cells	Myeloids (baboon)	LAMB1	CD44	4.82232e-06	0	LAMB1_CD44	LAMB1 - CD44	LAMININ	ECM-Receptor	KEGG: hsa04512
Neuronal cells	Myeloids (baboon)	LAMB1	CD44	4.82232e-06	0	LAMB1_CD44	LAMB1 - CD44	LAMININ	ECM-Receptor	KEGG: hsa04512
Vascular EC	Myeloids (baboon)	LAMB1	CD44	4.82232e-06	0	LAMB1_CD44	LAMB1 - CD44	LAMININ	ECM-Receptor	KEGG: hsa04512
Endocardial/lymphatic EC	Neuronal cells	LAMB1	CD44	2.41117e-06	0	LAMB1_CD44	LAMB1 - CD44	LAMININ	ECM-Receptor	KEGG: hsa04512
Fibroblasts	Neuronal cells	LAMB1	CD44	1.20557e-05	0	LAMB1_CD44	LAMB1 - CD44	LAMININ	ECM-Receptor	KEGG: hsa04512
Mural cells	Neuronal cells	LAMB1	CD44	2.41117e-06	0	LAMB1_CD44	LAMB1 - CD44	LAMININ	ECM-Receptor	KEGG: hsa04512
Neuronal cells	Neuronal cells	LAMB1	CD44	2.41117e-06	0	LAMB1_CD44	LAMB1 - CD44	LAMININ	ECM-Receptor	KEGG: hsa04512
Vascular EC	Neuronal cells	LAMB1	CD44	2.41117e-06	0	LAMB1_CD44	LAMB1 - CD44	LAMININ	ECM-Receptor	KEGG: hsa04512
Endocardial/lymphatic EC	Resident Immune	LAMB1	CD44	4.82232e-06	0	LAMB1_CD44	LAMB1 - CD44	LAMININ	ECM-Receptor	KEGG: hsa04512
Fibroblasts	Resident Immune	LAMB1	CD44	2.41111e-05	0	LAMB1_CD44	LAMB1 - CD44	LAMININ	ECM-Receptor	KEGG: hsa04512
Mural cells	Resident Immune	LAMB1	CD44	4.82232e-06	0	LAMB1_CD44	LAMB1 - CD44	LAMININ	ECM-Receptor	KEGG: hsa04512
Neuronal cells	Resident Immune	LAMB1	CD44	4.82232e-06	0	LAMB1_CD44	LAMB1 - CD44	LAMININ	ECM-Receptor	KEGG: hsa04512
Vascular EC	Resident Immune	LAMB1	CD44	4.82232e-06	0	LAMB1_CD44	LAMB1 - CD44	LAMININ	ECM-Receptor	KEGG: hsa04512
CM	CM	LAMC1	CD44	1.9289e-05	0	LAMC1_CD44	LAMC1 - CD44	LAMININ	ECM-Receptor	KEGG: hsa04512
Endocardial/lymphatic EC	CM	LAMC1	CD44	2.41111e-05	0	LAMC1_CD44	LAMC1 - CD44	LAMININ	ECM-Receptor	KEGG: hsa04512
Fibroblasts	CM	LAMC1	CD44	4.82211e-05	0	LAMC1_CD44	LAMC1 - CD44	LAMININ	ECM-Receptor	KEGG: hsa04512
Mural cells	CM	LAMC1	CD44	1.9289e-05	0	LAMC1_CD44	LAMC1 - CD44	LAMININ	ECM-Receptor	KEGG: hsa04512
CM	Lymphoids (baboon)	LAMC1	CD44	1.9289e-05	0	LAMC1_CD44	LAMC1 - CD44	LAMININ	ECM-Receptor	KEGG: hsa04512
Endocardial/lymphatic EC	Lymphoids (baboon)	LAMC1	CD44	2.41111e-05	0	LAMC1_CD44	LAMC1 - CD44	LAMININ	ECM-Receptor	KEGG: hsa04512
Fibroblasts	Lymphoids (baboon)	LAMC1	CD44	4.82211e-05	0	LAMC1_CD44	LAMC1 - CD44	LAMININ	ECM-Receptor	KEGG: hsa04512
Mural cells	Lymphoids (baboon)	LAMC1	CD44	1.9289e-05	0	LAMC1_CD44	LAMC1 - CD44	LAMININ	ECM-Receptor	KEGG: hsa04512
CM	Mast cells (baboon)	LAMC1	CD44	1.9289e-05	0.02	LAMC1_CD44	LAMC1 - CD44	LAMININ	ECM-Receptor	KEGG: hsa04512
Endocardial/lymphatic EC	Mast cells (baboon)	LAMC1	CD44	2.41111e-05	0.01	LAMC1_CD44	LAMC1 - CD44	LAMININ	ECM-Receptor	KEGG: hsa04512
Fibroblasts	Mast cells (baboon)	LAMC1	CD44	4.82211e-05	0	LAMC1_CD44	LAMC1 - CD44	LAMININ	ECM-Receptor	KEGG: hsa04512
Mural cells	Mast cells (baboon)	LAMC1	CD44	1.9289e-05	0.02	LAMC1_CD44	LAMC1 - CD44	LAMININ	ECM-Receptor	KEGG: hsa04512
CM	Myeloids (baboon)	LAMC1	CD44	1.9289e-05	0	LAMC1_CD44	LAMC1 - CD44	LAMININ	ECM-Receptor	KEGG: hsa04512
Endocardial/lymphatic EC	Myeloids (baboon)	LAMC1	CD44	2.41111e-05	0	LAMC1_CD44	LAMC1 - CD44	LAMININ	ECM-Receptor	KEGG: hsa04512
Fibroblasts	Myeloids (baboon)	LAMC1	CD44	4.82211e-05	0	LAMC1_CD44	LAMC1 - CD44	LAMININ	ECM-Receptor	KEGG: hsa04512
Mural cells	Myeloids (baboon)	LAMC1	CD44	1.9289e-05	0	LAMC1_CD44	LAMC1 - CD44	LAMININ	ECM-Receptor	KEGG: hsa04512
Fibroblasts	Neuronal cells	LAMC1	CD44	2.41111e-05	0	LAMC1_CD44	LAMC1 - CD44	LAMININ	ECM-Receptor	KEGG: hsa04512
CM	Resident Immune	LAMC1	CD44	1.9289e-05	0	LAMC1_CD44	LAMC1 - CD44	LAMININ	ECM-Receptor	KEGG: hsa04512
Endocardial/lymphatic EC	Resident Immune	LAMC1	CD44	2.41111e-05	0	LAMC1_CD44	LAMC1 - CD44	LAMININ	ECM-Receptor	KEGG: hsa04512
Fibroblasts	Resident Immune	LAMC1	CD44	4.82211e-05	0	LAMC1_CD44	LAMC1 - CD44	LAMININ	ECM-Receptor	KEGG: hsa04512
Mural cells	Resident Immune	LAMC1	CD44	1.9289e-05	0	LAMC1_CD44	LAMC1 - CD44	LAMININ	ECM-Receptor	KEGG: hsa04512
Endocardial/lymphatic EC	CM	THBS1	CD36	4.33992e-05	0	THBS1_CD36	THBS1 - CD36	THBS	ECM-Receptor	KEGG: hsa04512
Fibroblasts	CM	THBS1	CD36	0.000216958	0	THBS1_CD36	THBS1 - CD36	THBS	ECM-Receptor	KEGG: hsa04512
Mural cells	CM	THBS1	CD36	4.33992e-05	0	THBS1_CD36	THBS1 - CD36	THBS	ECM-Receptor	KEGG: hsa04512
Endocardial/lymphatic EC	Mural cells	THBS1	CD36	4.82232e-06	0.02	THBS1_CD36	THBS1 - CD36	THBS	ECM-Receptor	KEGG: hsa04512
Fibroblasts	Mural cells	THBS1	CD36	2.41111e-05	0	THBS1_CD36	THBS1 - CD36	THBS	ECM-Receptor	KEGG: hsa04512
Mural cells	Mural cells	THBS1	CD36	4.82232e-06	0	THBS1_CD36	THBS1 - CD36	THBS	ECM-Receptor	KEGG: hsa04512
Endocardial/lymphatic EC	Vascular EC	THBS1	CD36	1.9289e-05	0.02	THBS1_CD36	THBS1 - CD36	THBS	ECM-Receptor	KEGG: hsa04512
Fibroblasts	Vascular EC	THBS1	CD36	9.64376e-05	0	THBS1_CD36	THBS1 - CD36	THBS	ECM-Receptor	KEGG: hsa04512
Mural cells	Vascular EC	THBS1	CD36	1.9289e-05	0	THBS1_CD36	THBS1 - CD36	THBS	ECM-Receptor	KEGG: hsa04512
CM	CM	HSPG2	DAG1	4.82232e-06	0	HSPG2_DAG1	HSPG2 - DAG1	HSPG	ECM-Receptor	KEGG: hsa04512
Endocardial/lymphatic EC	CM	HSPG2	DAG1	1.9289e-05	0	HSPG2_DAG1	HSPG2 - DAG1	HSPG	ECM-Receptor	KEGG: hsa04512
Endothelial cells (baboon)	CM	HSPG2	DAG1	2.41117e-06	0	HSPG2_DAG1	HSPG2 - DAG1	HSPG	ECM-Receptor	KEGG: hsa04512
Fibroblasts	CM	HSPG2	DAG1	4.82232e-06	0	HSPG2_DAG1	HSPG2 - DAG1	HSPG	ECM-Receptor	KEGG: hsa04512
Neuronal cells	CM	HSPG2	DAG1	4.82232e-06	0	HSPG2_DAG1	HSPG2 - DAG1	HSPG	ECM-Receptor	KEGG: hsa04512
Vascular EC	CM	HSPG2	DAG1	2.41111e-05	0	HSPG2_DAG1	HSPG2 - DAG1	HSPG	ECM-Receptor	KEGG: hsa04512
CM	CM	LAMA4	DAG1	1.9289e-05	0	LAMA4_DAG1	LAMA4 - DAG1	LAMININ	ECM-Receptor	KEGG: hsa04512
Endocardial/lymphatic EC	CM	LAMA4	DAG1	4.82211e-05	0	LAMA4_DAG1	LAMA4 - DAG1	LAMININ	ECM-Receptor	KEGG: hsa04512
Fibroblasts	CM	LAMA4	DAG1	1.9289e-05	0	LAMA4_DAG1	LAMA4 - DAG1	LAMININ	ECM-Receptor	KEGG: hsa04512
Mural cells	CM	LAMA4	DAG1	4.82232e-06	0	LAMA4_DAG1	LAMA4 - DAG1	LAMININ	ECM-Receptor	KEGG: hsa04512
Neuronal cells	CM	LAMA4	DAG1	4.82232e-06	0	LAMA4_DAG1	LAMA4 - DAG1	LAMININ	ECM-Receptor	KEGG: hsa04512
Vascular EC	CM	LAMA4	DAG1	1.9289e-05	0	LAMA4_DAG1	LAMA4 - DAG1	LAMININ	ECM-Receptor	KEGG: hsa04512
Endocardial/lymphatic EC	CM	LAMB1	DAG1	4.82232e-06	0	LAMB1_DAG1	LAMB1 - DAG1	LAMININ	ECM-Receptor	KEGG: hsa04512
Fibroblasts	CM	LAMB1	DAG1	2.41111e-05	0	LAMB1_DAG1	LAMB1 - DAG1	LAMININ	ECM-Receptor	KEGG: hsa04512
Mural cells	CM	LAMB1	DAG1	4.82232e-06	0	LAMB1_DAG1	LAMB1 - DAG1	LAMININ	ECM-Receptor	KEGG: hsa04512
Neuronal cells	CM	LAMB1	DAG1	4.82232e-06	0	LAMB1_DAG1	LAMB1 - DAG1	LAMININ	ECM-Receptor	KEGG: hsa04512
Vascular EC	CM	LAMB1	DAG1	4.82232e-06	0	LAMB1_DAG1	LAMB1 - DAG1	LAMININ	ECM-Receptor	KEGG: hsa04512
CM	CM	LAMC1	DAG1	1.9289e-05	0	LAMC1_DAG1	LAMC1 - DAG1	LAMININ	ECM-Receptor	KEGG: hsa04512
Endocardial/lymphatic EC	CM	LAMC1	DAG1	2.41111e-05	0	LAMC1_DAG1	LAMC1 - DAG1	LAMININ	ECM-Receptor	KEGG: hsa04512
Endothelial cells (baboon)	CM	LAMC1	DAG1	2.41117e-06	0	LAMC1_DAG1	LAMC1 - DAG1	LAMININ	ECM-Receptor	KEGG: hsa04512
Fibroblasts	CM	LAMC1	DAG1	4.82211e-05	0	LAMC1_DAG1	LAMC1 - DAG1	LAMININ	ECM-Receptor	KEGG: hsa04512
Mural cells	CM	LAMC1	DAG1	1.9289e-05	0	LAMC1_DAG1	LAMC1 - DAG1	LAMININ	ECM-Receptor	KEGG: hsa04512
Neuronal cells	CM	LAMC1	DAG1	1.9289e-05	0	LAMC1_DAG1	LAMC1 - DAG1	LAMININ	ECM-Receptor	KEGG: hsa04512
Vascular EC	CM	LAMC1	DAG1	4.82232e-06	0	LAMC1_DAG1	LAMC1 - DAG1	LAMININ	ECM-Receptor	KEGG: hsa04512
CM	Endothelial cells (baboon)	APP	CD74	1.9289e-05	0	APP_CD74	APP - CD74	APP	Cell-Cell Contact	PMID: 19849849
Endocardial/lymphatic EC	Endothelial cells (baboon)	APP	CD74	4.33992e-05	0	APP_CD74	APP - CD74	APP	Cell-Cell Contact	PMID: 19849849
Endothelial cells (baboon)	Endothelial cells (baboon)	APP	CD74	7.23346e-06	0	APP_CD74	APP - CD74	APP	Cell-Cell Contact	PMID: 19849849
Fibroblasts	Endothelial cells (baboon)	APP	CD74	4.82232e-06	0.02	APP_CD74	APP - CD74	APP	Cell-Cell Contact	PMID: 19849849
Mural cells	Endothelial cells (baboon)	APP	CD74	4.82232e-06	0.02	APP_CD74	APP - CD74	APP	Cell-Cell Contact	PMID: 19849849
Neuronal cells	Endothelial cells (baboon)	APP	CD74	1.9289e-05	0	APP_CD74	APP - CD74	APP	Cell-Cell Contact	PMID: 19849849
Resident Immune	Endothelial cells (baboon)	APP	CD74	0.000109696	0	APP_CD74	APP - CD74	APP	Cell-Cell Contact	PMID: 19849849
Vascular EC	Endothelial cells (baboon)	APP	CD74	4.33992e-05	0	APP_CD74	APP - CD74	APP	Cell-Cell Contact	PMID: 19849849
CM	Myeloids (baboon)	APP	CD74	7.71516e-05	0	APP_CD74	APP - CD74	APP	Cell-Cell Contact	PMID: 19849849
Endocardial/lymphatic EC	Myeloids (baboon)	APP	CD74	0.000173574	0	APP_CD74	APP - CD74	APP	Cell-Cell Contact	PMID: 19849849
Endothelial cells (baboon)	Myeloids (baboon)	APP	CD74	2.89332e-05	0	APP_CD74	APP - CD74	APP	Cell-Cell Contact	PMID: 19849849
Fibroblasts	Myeloids (baboon)	APP	CD74	1.9289e-05	0	APP_CD74	APP - CD74	APP	Cell-Cell Contact	PMID: 19849849
Mural cells	Myeloids (baboon)	APP	CD74	1.9289e-05	0	APP_CD74	APP - CD74	APP	Cell-Cell Contact	PMID: 19849849
Neuronal cells	Myeloids (baboon)	APP	CD74	7.71516e-05	0	APP_CD74	APP - CD74	APP	Cell-Cell Contact	PMID: 19849849
Resident Immune	Myeloids (baboon)	APP	CD74	0.000438641	0	APP_CD74	APP - CD74	APP	Cell-Cell Contact	PMID: 19849849
Vascular EC	Myeloids (baboon)	APP	CD74	0.000173574	0	APP_CD74	APP - CD74	APP	Cell-Cell Contact	PMID: 19849849
Neuronal cells	Neuronal cells	CADM1	CADM1	7.71516e-05	0	CADM1_CADM1	CADM1 - CADM1	CADM	Cell-Cell Contact	PMID: 24503895
Resident Immune	Neuronal cells	CADM1	CADM1	9.16162e-05	0	CADM1_CADM1	CADM1 - CADM1	CADM	Cell-Cell Contact	PMID: 24503895
Neuronal cells	Resident Immune	CADM1	CADM1	9.16162e-05	0	CADM1_CADM1	CADM1 - CADM1	CADM	Cell-Cell Contact	PMID: 24503895
Resident Immune	Resident Immune	CADM1	CADM1	0.000108792	0	CADM1_CADM1	CADM1 - CADM1	CADM	Cell-Cell Contact	PMID: 24503895
Endothelial cells (baboon)	Endocardial/lymphatic EC	PTPRC	MRC1	8.43839e-05	0	PTPRC_MRC1	PTPRC - MRC1	CD45	Cell-Cell Contact	PMID: 27601670; PMID: 10575006
Lymphoids (baboon)	Endocardial/lymphatic EC	PTPRC	MRC1	0.000192857	0	PTPRC_MRC1	PTPRC - MRC1	CD45	Cell-Cell Contact	PMID: 27601670; PMID: 10575006
Mast cells (baboon)	Endocardial/lymphatic EC	PTPRC	MRC1	2.41111e-05	0	PTPRC_MRC1	PTPRC - MRC1	CD45	Cell-Cell Contact	PMID: 27601670; PMID: 10575006
Myeloids (baboon)	Endocardial/lymphatic EC	PTPRC	MRC1	9.64376e-05	0	PTPRC_MRC1	PTPRC - MRC1	CD45	Cell-Cell Contact	PMID: 27601670; PMID: 10575006
Resident Immune	Endocardial/lymphatic EC	PTPRC	MRC1	9.64376e-05	0	PTPRC_MRC1	PTPRC - MRC1	CD45	Cell-Cell Contact	PMID: 27601670; PMID: 10575006
Vascular EC	Endocardial/lymphatic EC	PTPRC	MRC1	2.41111e-05	0	PTPRC_MRC1	PTPRC - MRC1	CD45	Cell-Cell Contact	PMID: 27601670; PMID: 10575006
Endothelial cells (baboon)	Myeloids (baboon)	PTPRC	MRC1	1.68779e-05	0	PTPRC_MRC1	PTPRC - MRC1	CD45	Cell-Cell Contact	PMID: 27601670; PMID: 10575006
Lymphoids (baboon)	Myeloids (baboon)	PTPRC	MRC1	3.85773e-05	0	PTPRC_MRC1	PTPRC - MRC1	CD45	Cell-Cell Contact	PMID: 27601670; PMID: 10575006
Mast cells (baboon)	Myeloids (baboon)	PTPRC	MRC1	4.82232e-06	0	PTPRC_MRC1	PTPRC - MRC1	CD45	Cell-Cell Contact	PMID: 27601670; PMID: 10575006
Myeloids (baboon)	Myeloids (baboon)	PTPRC	MRC1	1.9289e-05	0	PTPRC_MRC1	PTPRC - MRC1	CD45	Cell-Cell Contact	PMID: 27601670; PMID: 10575006
Resident Immune	Myeloids (baboon)	PTPRC	MRC1	1.9289e-05	0	PTPRC_MRC1	PTPRC - MRC1	CD45	Cell-Cell Contact	PMID: 27601670; PMID: 10575006
Vascular EC	Myeloids (baboon)	PTPRC	MRC1	4.82232e-06	0	PTPRC_MRC1	PTPRC - MRC1	CD45	Cell-Cell Contact	PMID: 27601670; PMID: 10575006
Endothelial cells (baboon)	Resident Immune	PTPRC	MRC1	0.000303715	0	PTPRC_MRC1	PTPRC - MRC1	CD45	Cell-Cell Contact	PMID: 27601670; PMID: 10575006
Lymphoids (baboon)	Resident Immune	PTPRC	MRC1	0.000693936	0	PTPRC_MRC1	PTPRC - MRC1	CD45	Cell-Cell Contact	PMID: 27601670; PMID: 10575006
Mast cells (baboon)	Resident Immune	PTPRC	MRC1	8.67947e-05	0	PTPRC_MRC1	PTPRC - MRC1	CD45	Cell-Cell Contact	PMID: 27601670; PMID: 10575006
Myeloids (baboon)	Resident Immune	PTPRC	MRC1	0.000347088	0	PTPRC_MRC1	PTPRC - MRC1	CD45	Cell-Cell Contact	PMID: 27601670; PMID: 10575006
Resident Immune	Resident Immune	PTPRC	MRC1	0.000347088	0	PTPRC_MRC1	PTPRC - MRC1	CD45	Cell-Cell Contact	PMID: 27601670; PMID: 10575006
Vascular EC	Resident Immune	PTPRC	MRC1	8.67947e-05	0	PTPRC_MRC1	PTPRC - MRC1	CD45	Cell-Cell Contact	PMID: 27601670; PMID: 10575006
CM	CM	CDH2	CDH2	0.00587268	0	CDH2_CDH2	CDH2 - CDH2	CDH	Cell-Cell Contact	KEGG: hsa04514
Endocardial/lymphatic EC	Endocardial/lymphatic EC	CDH5	CDH5	4.82232e-06	0	CDH5_CDH5	CDH5 - CDH5	CDH5	Cell-Cell Contact	KEGG: hsa04514
Vascular EC	Endocardial/lymphatic EC	CDH5	CDH5	4.82232e-06	0	CDH5_CDH5	CDH5 - CDH5	CDH5	Cell-Cell Contact	KEGG: hsa04514
Endocardial/lymphatic EC	Vascular EC	CDH5	CDH5	4.82232e-06	0	CDH5_CDH5	CDH5 - CDH5	CDH5	Cell-Cell Contact	KEGG: hsa04514
Vascular EC	Vascular EC	CDH5	CDH5	4.82232e-06	0	CDH5_CDH5	CDH5 - CDH5	CDH5	Cell-Cell Contact	KEGG: hsa04514
CM	Endocardial/lymphatic EC	EFNA5	EPHA4	6.75083e-05	0	EFNA5_EPHA4	EFNA5 - EPHA4	EPHA	Cell-Cell Contact	PMID: 15114347
Endocardial/lymphatic EC	Endocardial/lymphatic EC	EFNA5	EPHA4	4.82232e-06	0	EFNA5_EPHA4	EFNA5 - EPHA4	EPHA	Cell-Cell Contact	PMID: 15114347
Fibroblasts	Endocardial/lymphatic EC	EFNA5	EPHA4	4.82232e-06	0	EFNA5_EPHA4	EFNA5 - EPHA4	EPHA	Cell-Cell Contact	PMID: 15114347
CM	Neuronal cells	EFNA5	EPHA5	3.37553e-05	0	EFNA5_EPHA5	EFNA5 - EPHA5	EPHA	Cell-Cell Contact	PMID: 15114347
Endocardial/lymphatic EC	Neuronal cells	EFNA5	EPHA5	2.41117e-06	0	EFNA5_EPHA5	EFNA5 - EPHA5	EPHA	Cell-Cell Contact	PMID: 15114347
Fibroblasts	Neuronal cells	EFNA5	EPHA5	2.41117e-06	0	EFNA5_EPHA5	EFNA5 - EPHA5	EPHA	Cell-Cell Contact	PMID: 15114347
CM	CM	EFNA5	EPHA7	6.75083e-05	0	EFNA5_EPHA7	EFNA5 - EPHA7	EPHA	Cell-Cell Contact	PMID: 15114347
Endocardial/lymphatic EC	CM	EFNA5	EPHA7	4.82232e-06	0	EFNA5_EPHA7	EFNA5 - EPHA7	EPHA	Cell-Cell Contact	PMID: 15114347
Fibroblasts	CM	EFNA5	EPHA7	4.82232e-06	0	EFNA5_EPHA7	EFNA5 - EPHA7	EPHA	Cell-Cell Contact	PMID: 15114347
CM	Fibroblasts	EFNA5	EPHA7	6.75083e-05	0	EFNA5_EPHA7	EFNA5 - EPHA7	EPHA	Cell-Cell Contact	PMID: 15114347
Endocardial/lymphatic EC	Fibroblasts	EFNA5	EPHA7	4.82232e-06	0	EFNA5_EPHA7	EFNA5 - EPHA7	EPHA	Cell-Cell Contact	PMID: 15114347
Fibroblasts	Fibroblasts	EFNA5	EPHA7	4.82232e-06	0	EFNA5_EPHA7	EFNA5 - EPHA7	EPHA	Cell-Cell Contact	PMID: 15114347
Vascular EC	Vascular EC	ESAM	ESAM	4.82232e-06	0	ESAM_ESAM	ESAM - ESAM	ESAM	Cell-Cell Contact	KEGG: hsa04514; PMID: 11279107
Vascular EC	Vascular EC	JAM3	JAM3	4.82232e-06	0	JAM3_JAM3	JAM3 - JAM3	JAM	Cell-Cell Contact	KEGG: hsa04514
Endothelial cells (baboon)	Endothelial cells (baboon)	MPZL1	MPZL1	4.82232e-06	0	MPZL1_MPZL1	MPZL1 - MPZL1	MPZ	Cell-Cell Contact	KEGG: hsa04514
Lymphoids (baboon)	Endothelial cells (baboon)	MPZL1	MPZL1	4.82232e-06	0	MPZL1_MPZL1	MPZL1 - MPZL1	MPZ	Cell-Cell Contact	KEGG: hsa04514
Endothelial cells (baboon)	Lymphoids (baboon)	MPZL1	MPZL1	4.82232e-06	0	MPZL1_MPZL1	MPZL1 - MPZL1	MPZ	Cell-Cell Contact	KEGG: hsa04514
Lymphoids (baboon)	Lymphoids (baboon)	MPZL1	MPZL1	4.82232e-06	0	MPZL1_MPZL1	MPZL1 - MPZL1	MPZ	Cell-Cell Contact	KEGG: hsa04514
CM	CM	NCAM1	FGFR1	0.000289257	0	NCAM1_FGFR1	NCAM1 - FGFR1	NCAM	Cell-Cell Contact	PMID: 12791257
CM	CM	NCAM1	NCAM1	0.000693936	0	NCAM1_NCAM1	NCAM1 - NCAM1	NCAM	Cell-Cell Contact	KEGG: hsa04514
Neuronal cells	CM	NCAM1	NCAM1	0.000289257	0.01	NCAM1_NCAM1	NCAM1 - NCAM1	NCAM	Cell-Cell Contact	KEGG: hsa04514
CM	Neuronal cells	NCAM1	NCAM1	0.000289257	0.01	NCAM1_NCAM1	NCAM1 - NCAM1	NCAM	Cell-Cell Contact	KEGG: hsa04514
CM	Neuronal cells	NCAM1	NCAM2	0.000231419	0	NCAM1_NCAM2	NCAM1 - NCAM2	NCAM	Cell-Cell Contact	KEGG: hsa04514
Fibroblasts	Neuronal cells	NCAM1	NCAM2	1.9289e-05	0	NCAM1_NCAM2	NCAM1 - NCAM2	NCAM	Cell-Cell Contact	KEGG: hsa04514
Neuronal cells	Neuronal cells	NCAM1	NCAM2	9.64376e-05	0	NCAM1_NCAM2	NCAM1 - NCAM2	NCAM	Cell-Cell Contact	KEGG: hsa04514
Fibroblasts	Fibroblasts	NEGR1	NEGR1	4.82232e-06	0	NEGR1_NEGR1	NEGR1 - NEGR1	NEGR	Cell-Cell Contact	KEGG: hsa04514
Neuronal cells	Endocardial/lymphatic EC	LRRC4C	NTNG1	4.82232e-06	0	LRRC4C_NTNG1	LRRC4C - NTNG1	NGL	Cell-Cell Contact	KEGG: hsa04514
Neuronal cells	Neuronal cells	NRXN1	NLGN1	5.3043e-05	0	NRXN1_NLGN1	NRXN1 - NLGN1	NRXN	Cell-Cell Contact	KEGG: hsa04514
Endocardial/lymphatic EC	Endocardial/lymphatic EC	PECAM1	PECAM1	0.000390457	0	PECAM1_PECAM1	PECAM1 - PECAM1	PECAM1	Cell-Cell Contact	KEGG: hsa04514
Endothelial cells (baboon)	Endocardial/lymphatic EC	PECAM1	PECAM1	2.17001e-05	0	PECAM1_PECAM1	PECAM1 - PECAM1	PECAM1	Cell-Cell Contact	KEGG: hsa04514
Vascular EC	Endocardial/lymphatic EC	PECAM1	PECAM1	0.000390457	0	PECAM1_PECAM1	PECAM1 - PECAM1	PECAM1	Cell-Cell Contact	KEGG: hsa04514
Endocardial/lymphatic EC	Endothelial cells (baboon)	PECAM1	PECAM1	2.17001e-05	0	PECAM1_PECAM1	PECAM1 - PECAM1	PECAM1	Cell-Cell Contact	KEGG: hsa04514
Vascular EC	Endothelial cells (baboon)	PECAM1	PECAM1	2.17001e-05	0	PECAM1_PECAM1	PECAM1 - PECAM1	PECAM1	Cell-Cell Contact	KEGG: hsa04514
Endocardial/lymphatic EC	Vascular EC	PECAM1	PECAM1	0.000390457	0	PECAM1_PECAM1	PECAM1 - PECAM1	PECAM1	Cell-Cell Contact	KEGG: hsa04514
Endothelial cells (baboon)	Vascular EC	PECAM1	PECAM1	2.17001e-05	0	PECAM1_PECAM1	PECAM1 - PECAM1	PECAM1	Cell-Cell Contact	KEGG: hsa04514
Vascular EC	Vascular EC	PECAM1	PECAM1	0.000390457	0	PECAM1_PECAM1	PECAM1 - PECAM1	PECAM1	Cell-Cell Contact	KEGG: hsa04514
CM	CM	PTPRM	PTPRM	0.00156	0	PTPRM_PTPRM	PTPRM - PTPRM	PTPRM	Cell-Cell Contact	KEGG: hsa04514
Endocardial/lymphatic EC	CM	PTPRM	PTPRM	0.00225178	0	PTPRM_PTPRM	PTPRM - PTPRM	PTPRM	Cell-Cell Contact	KEGG: hsa04514
Fibroblasts	CM	PTPRM	PTPRM	0.00121376	0	PTPRM_PTPRM	PTPRM - PTPRM	PTPRM	Cell-Cell Contact	KEGG: hsa04514
Vascular EC	CM	PTPRM	PTPRM	0.00294259	0	PTPRM_PTPRM	PTPRM - PTPRM	PTPRM	Cell-Cell Contact	KEGG: hsa04514
CM	Endocardial/lymphatic EC	PTPRM	PTPRM	0.00225178	0	PTPRM_PTPRM	PTPRM - PTPRM	PTPRM	Cell-Cell Contact	KEGG: hsa04514
Endocardial/lymphatic EC	Endocardial/lymphatic EC	PTPRM	PTPRM	0.00324931	0	PTPRM_PTPRM	PTPRM - PTPRM	PTPRM	Cell-Cell Contact	KEGG: hsa04514
Fibroblasts	Endocardial/lymphatic EC	PTPRM	PTPRM	0.00175226	0	PTPRM_PTPRM	PTPRM - PTPRM	PTPRM	Cell-Cell Contact	KEGG: hsa04514
Vascular EC	Endocardial/lymphatic EC	PTPRM	PTPRM	0.00424486	0	PTPRM_PTPRM	PTPRM - PTPRM	PTPRM	Cell-Cell Contact	KEGG: hsa04514
CM	Fibroblasts	PTPRM	PTPRM	0.00121376	0	PTPRM_PTPRM	PTPRM - PTPRM	PTPRM	Cell-Cell Contact	KEGG: hsa04514
Endocardial/lymphatic EC	Fibroblasts	PTPRM	PTPRM	0.00175226	0	PTPRM_PTPRM	PTPRM - PTPRM	PTPRM	Cell-Cell Contact	KEGG: hsa04514
Fibroblasts	Fibroblasts	PTPRM	PTPRM	0.000944287	0	PTPRM_PTPRM	PTPRM - PTPRM	PTPRM	Cell-Cell Contact	KEGG: hsa04514
Vascular EC	Fibroblasts	PTPRM	PTPRM	0.00229018	0	PTPRM_PTPRM	PTPRM - PTPRM	PTPRM	Cell-Cell Contact	KEGG: hsa04514
CM	Vascular EC	PTPRM	PTPRM	0.00294259	0	PTPRM_PTPRM	PTPRM - PTPRM	PTPRM	Cell-Cell Contact	KEGG: hsa04514
Endocardial/lymphatic EC	Vascular EC	PTPRM	PTPRM	0.00424486	0	PTPRM_PTPRM	PTPRM - PTPRM	PTPRM	Cell-Cell Contact	KEGG: hsa04514
Fibroblasts	Vascular EC	PTPRM	PTPRM	0.00229018	0	PTPRM_PTPRM	PTPRM - PTPRM	PTPRM	Cell-Cell Contact	KEGG: hsa04514
Vascular EC	Vascular EC	PTPRM	PTPRM	0.00554373	0	PTPRM_PTPRM	PTPRM - PTPRM	PTPRM	Cell-Cell Contact	KEGG: hsa04514
Endocardial/lymphatic EC	CM	SEMA6A	PLXNA2	6.26866e-05	0	SEMA6A_PLXNA2	SEMA6A - PLXNA2	SEMA6	Cell-Cell Contact	PMID: 27533782
Vascular EC	CM	SEMA6A	PLXNA2	4.82232e-06	0	SEMA6A_PLXNA2	SEMA6A - PLXNA2	SEMA6	Cell-Cell Contact	PMID: 27533782
Endocardial/lymphatic EC	Endocardial/lymphatic EC	SEMA6A	PLXNA2	6.26866e-05	0	SEMA6A_PLXNA2	SEMA6A - PLXNA2	SEMA6	Cell-Cell Contact	PMID: 27533782
Vascular EC	Endocardial/lymphatic EC	SEMA6A	PLXNA2	4.82232e-06	0	SEMA6A_PLXNA2	SEMA6A - PLXNA2	SEMA6	Cell-Cell Contact	PMID: 27533782
Endocardial/lymphatic EC	Endothelial cells (baboon)	SEMA6A	PLXNA2	0.000219369	0	SEMA6A_PLXNA2	SEMA6A - PLXNA2	SEMA6	Cell-Cell Contact	PMID: 27533782
Vascular EC	Endothelial cells (baboon)	SEMA6A	PLXNA2	1.68779e-05	0	SEMA6A_PLXNA2	SEMA6A - PLXNA2	SEMA6	Cell-Cell Contact	PMID: 27533782
Endocardial/lymphatic EC	Vascular EC	SEMA6A	PLXNA2	0.000250699	0	SEMA6A_PLXNA2	SEMA6A - PLXNA2	SEMA6	Cell-Cell Contact	PMID: 27533782
Vascular EC	Vascular EC	SEMA6A	PLXNA2	1.9289e-05	0	SEMA6A_PLXNA2	SEMA6A - PLXNA2	SEMA6	Cell-Cell Contact	PMID: 27533782
Endocardial/lymphatic EC	CM	SEMA6A	PLXNA4	6.26866e-05	0	SEMA6A_PLXNA4	SEMA6A - PLXNA4	SEMA6	Cell-Cell Contact	PMID: 27533782
Vascular EC	CM	SEMA6A	PLXNA4	4.82232e-06	0	SEMA6A_PLXNA4	SEMA6A - PLXNA4	SEMA6	Cell-Cell Contact	PMID: 27533782
Endocardial/lymphatic EC	Endocardial/lymphatic EC	SEMA6A	PLXNA4	6.26866e-05	0	SEMA6A_PLXNA4	SEMA6A - PLXNA4	SEMA6	Cell-Cell Contact	PMID: 27533782
Vascular EC	Endocardial/lymphatic EC	SEMA6A	PLXNA4	4.82232e-06	0	SEMA6A_PLXNA4	SEMA6A - PLXNA4	SEMA6	Cell-Cell Contact	PMID: 27533782
Endocardial/lymphatic EC	Fibroblasts	SEMA6A	PLXNA4	0.000438641	0	SEMA6A_PLXNA4	SEMA6A - PLXNA4	SEMA6	Cell-Cell Contact	PMID: 27533782
Vascular EC	Fibroblasts	SEMA6A	PLXNA4	3.37553e-05	0	SEMA6A_PLXNA4	SEMA6A - PLXNA4	SEMA6	Cell-Cell Contact	PMID: 27533782

## Sheet: 3-month protocol
source	target	ligand	receptor	prob	pval	interaction_name	interaction_name_2	pathway_name	annotation	evidence
Endocardial/lymphatic EC	CM	BMP6	ACVR1_ACVR2A	3.4721e-05	0	BMP6_ACVR1_ACVR2A	BMP6 - (ACVR1+ACVR2A)	BMP	Secreted Signaling	KEGG: hsa04350; PMID:26893264
Fibroblasts	CM	BMP6	ACVR1_ACVR2A	8.68048e-06	0	BMP6_ACVR1_ACVR2A	BMP6 - (ACVR1+ACVR2A)	BMP	Secreted Signaling	KEGG: hsa04350; PMID:26893264
Vascular EC	CM	BMP6	ACVR1_ACVR2A	8.68048e-06	0	BMP6_ACVR1_ACVR2A	BMP6 - (ACVR1+ACVR2A)	BMP	Secreted Signaling	KEGG: hsa04350; PMID:26893264
Endocardial/lymphatic EC	CM	BMP6	ACVR1_BMPR2	3.4721e-05	0	BMP6_ACVR1_BMPR2	BMP6 - (ACVR1+BMPR2)	BMP	Secreted Signaling	KEGG: hsa04350; PMID:26893264
Fibroblasts	CM	BMP6	ACVR1_BMPR2	8.68048e-06	0	BMP6_ACVR1_BMPR2	BMP6 - (ACVR1+BMPR2)	BMP	Secreted Signaling	KEGG: hsa04350; PMID:26893264
Vascular EC	CM	BMP6	ACVR1_BMPR2	8.68048e-06	0	BMP6_ACVR1_BMPR2	BMP6 - (ACVR1+BMPR2)	BMP	Secreted Signaling	KEGG: hsa04350; PMID:26893264
Endocardial/lymphatic EC	CM	BMP6	BMPR1A_ACVR2A	6.94396e-05	0	BMP6_BMPR1A_ACVR2A	BMP6 - (BMPR1A+ACVR2A)	BMP	Secreted Signaling	KEGG: hsa04350; PMID:26893264
Fibroblasts	CM	BMP6	BMPR1A_ACVR2A	1.73608e-05	0	BMP6_BMPR1A_ACVR2A	BMP6 - (BMPR1A+ACVR2A)	BMP	Secreted Signaling	KEGG: hsa04350; PMID:26893264
Vascular EC	CM	BMP6	BMPR1A_ACVR2A	1.73608e-05	0	BMP6_BMPR1A_ACVR2A	BMP6 - (BMPR1A+ACVR2A)	BMP	Secreted Signaling	KEGG: hsa04350; PMID:26893264
Endocardial/lymphatic EC	Fibroblasts	BMP6	BMPR1A_ACVR2A	3.4721e-05	0	BMP6_BMPR1A_ACVR2A	BMP6 - (BMPR1A+ACVR2A)	BMP	Secreted Signaling	KEGG: hsa04350; PMID:26893264
Fibroblasts	Fibroblasts	BMP6	BMPR1A_ACVR2A	8.68048e-06	0	BMP6_BMPR1A_ACVR2A	BMP6 - (BMPR1A+ACVR2A)	BMP	Secreted Signaling	KEGG: hsa04350; PMID:26893264
Vascular EC	Fibroblasts	BMP6	BMPR1A_ACVR2A	8.68048e-06	0	BMP6_BMPR1A_ACVR2A	BMP6 - (BMPR1A+ACVR2A)	BMP	Secreted Signaling	KEGG: hsa04350; PMID:26893264
Endocardial/lymphatic EC	CM	BMP6	BMPR1A_BMPR2	6.94396e-05	0	BMP6_BMPR1A_BMPR2	BMP6 - (BMPR1A+BMPR2)	BMP	Secreted Signaling	KEGG: hsa04350; PMID:26893264
Fibroblasts	CM	BMP6	BMPR1A_BMPR2	1.73608e-05	0	BMP6_BMPR1A_BMPR2	BMP6 - (BMPR1A+BMPR2)	BMP	Secreted Signaling	KEGG: hsa04350; PMID:26893264
Vascular EC	CM	BMP6	BMPR1A_BMPR2	1.73608e-05	0	BMP6_BMPR1A_BMPR2	BMP6 - (BMPR1A+BMPR2)	BMP	Secreted Signaling	KEGG: hsa04350; PMID:26893264
Endocardial/lymphatic EC	Fibroblasts	BMP6	BMPR1A_BMPR2	3.4721e-05	0	BMP6_BMPR1A_BMPR2	BMP6 - (BMPR1A+BMPR2)	BMP	Secreted Signaling	KEGG: hsa04350; PMID:26893264
Fibroblasts	Fibroblasts	BMP6	BMPR1A_BMPR2	8.68048e-06	0	BMP6_BMPR1A_BMPR2	BMP6 - (BMPR1A+BMPR2)	BMP	Secreted Signaling	KEGG: hsa04350; PMID:26893264
Vascular EC	Fibroblasts	BMP6	BMPR1A_BMPR2	8.68048e-06	0	BMP6_BMPR1A_BMPR2	BMP6 - (BMPR1A+BMPR2)	BMP	Secreted Signaling	KEGG: hsa04350; PMID:26893264
Mast cells (baboon)	Neuronal cells	NRG1	ERBB3	0.000145378	0	NRG1_ERBB3	NRG1 - ERBB3	NRG	Secreted Signaling	KEGG: hsa04012
Mast cells (baboon)	CM	NRG1	ERBB4	0.000581259	0	NRG1_ERBB4	NRG1 - ERBB4	NRG	Secreted Signaling	KEGG: hsa04012
CM	CM	FGF1	FGFR1	2.6041e-05	0	FGF1_FGFR1	FGF1 - FGFR1	FGF	Secreted Signaling	PMC: 4393358
CM	Fibroblasts	FGF1	FGFR1	8.68048e-06	0	FGF1_FGFR1	FGF1 - FGFR1	FGF	Secreted Signaling	PMC: 4393358
Fibroblasts	CM	FGF2	FGFR1	2.6041e-05	0	FGF2_FGFR1	FGF2 - FGFR1	FGF	Secreted Signaling	PMC: 4393358
Neuronal cells	CM	FGF2	FGFR1	2.6041e-05	0	FGF2_FGFR1	FGF2 - FGFR1	FGF	Secreted Signaling	PMC: 4393358
Fibroblasts	Endothelial cells (baboon)	FGF2	FGFR1	8.68048e-06	0	FGF2_FGFR1	FGF2 - FGFR1	FGF	Secreted Signaling	PMC: 4393358
Neuronal cells	Endothelial cells (baboon)	FGF2	FGFR1	8.68048e-06	0	FGF2_FGFR1	FGF2 - FGFR1	FGF	Secreted Signaling	PMC: 4393358
Fibroblasts	Fibroblasts	FGF2	FGFR1	8.68048e-06	0	FGF2_FGFR1	FGF2 - FGFR1	FGF	Secreted Signaling	PMC: 4393358
Neuronal cells	Fibroblasts	FGF2	FGFR1	8.68048e-06	0	FGF2_FGFR1	FGF2 - FGFR1	FGF	Secreted Signaling	PMC: 4393358
CM	Fibroblasts	PDGFC	PDGFRA	3.4721e-05	0	PDGFC_PDGFRA	PDGFC - PDGFRA	PDGF	Secreted Signaling	PMID: 15207812
Myeloids (baboon)	Fibroblasts	PDGFC	PDGFRA	3.4721e-05	0	PDGFC_PDGFRA	PDGFC - PDGFRA	PDGF	Secreted Signaling	PMID: 15207812
Resident Immune	Fibroblasts	PDGFC	PDGFRA	3.4721e-05	0	PDGFC_PDGFRA	PDGFC - PDGFRA	PDGF	Secreted Signaling	PMID: 15207812
Endocardial/lymphatic EC	Mural cells	PDGFD	PDGFRB	3.4721e-05	0	PDGFD_PDGFRB	PDGFD - PDGFRB	PDGF	Secreted Signaling	PMID: 15207812
Fibroblasts	Mural cells	PDGFD	PDGFRB	0.000173581	0	PDGFD_PDGFRB	PDGFD - PDGFRB	PDGF	Secreted Signaling	PMID: 15207812
Neuronal cells	Mural cells	PDGFD	PDGFRB	6.94396e-05	0	PDGFD_PDGFRB	PDGFD - PDGFRB	PDGF	Secreted Signaling	PMID: 15207812
Vascular EC	Mural cells	PDGFD	PDGFRB	0.000173581	0	PDGFD_PDGFRB	PDGFD - PDGFRB	PDGF	Secreted Signaling	PMID: 15207812
Endocardial/lymphatic EC	CM	IGF1	IGF1R	0.000260349	0	IGF1_IGF1R	IGF1 - IGF1R	IGF	Secreted Signaling	PMID: 14604834
Fibroblasts	CM	IGF1	IGF1R	0.000260349	0	IGF1_IGF1R	IGF1 - IGF1R	IGF	Secreted Signaling	PMID: 14604834
Endocardial/lymphatic EC	Endocardial/lymphatic EC	IGF1	IGF1R	3.4721e-05	0	IGF1_IGF1R	IGF1 - IGF1R	IGF	Secreted Signaling	PMID: 14604834
Fibroblasts	Endocardial/lymphatic EC	IGF1	IGF1R	3.4721e-05	0	IGF1_IGF1R	IGF1 - IGF1R	IGF	Secreted Signaling	PMID: 14604834
Endocardial/lymphatic EC	Fibroblasts	IGF1	IGF1R	8.68048e-06	0	IGF1_IGF1R	IGF1 - IGF1R	IGF	Secreted Signaling	PMID: 14604834
Fibroblasts	Fibroblasts	IGF1	IGF1R	8.68048e-06	0	IGF1_IGF1R	IGF1 - IGF1R	IGF	Secreted Signaling	PMID: 14604834
Endocardial/lymphatic EC	Mural cells	IGF1	IGF1R	8.68048e-06	0	IGF1_IGF1R	IGF1 - IGF1R	IGF	Secreted Signaling	PMID: 14604834
Fibroblasts	Mural cells	IGF1	IGF1R	8.68048e-06	0	IGF1_IGF1R	IGF1 - IGF1R	IGF	Secreted Signaling	PMID: 14604834
Endocardial/lymphatic EC	Neuronal cells	IGF1	IGF1R	8.68048e-06	0	IGF1_IGF1R	IGF1 - IGF1R	IGF	Secreted Signaling	PMID: 14604834
Fibroblasts	Neuronal cells	IGF1	IGF1R	8.68048e-06	0	IGF1_IGF1R	IGF1 - IGF1R	IGF	Secreted Signaling	PMID: 14604834
Endocardial/lymphatic EC	Resident Immune	IGF1	IGF1R	8.68048e-06	0	IGF1_IGF1R	IGF1 - IGF1R	IGF	Secreted Signaling	PMID: 14604834
Fibroblasts	Resident Immune	IGF1	IGF1R	8.68048e-06	0	IGF1_IGF1R	IGF1 - IGF1R	IGF	Secreted Signaling	PMID: 14604834
Endocardial/lymphatic EC	Vascular EC	IGF1	IGF1R	8.68048e-06	0	IGF1_IGF1R	IGF1 - IGF1R	IGF	Secreted Signaling	PMID: 14604834
Fibroblasts	Vascular EC	IGF1	IGF1R	8.68048e-06	0	IGF1_IGF1R	IGF1 - IGF1R	IGF	Secreted Signaling	PMID: 14604834
CM	Myeloids (baboon)	IL34	CSF1R	8.68048e-06	0	IL34_CSF1R	IL34 - CSF1R	CSF	Secreted Signaling	KEGG: hsa04060
CM	Resident Immune	IL34	CSF1R	8.68048e-06	0	IL34_CSF1R	IL34 - CSF1R	CSF	Secreted Signaling	KEGG: hsa04060
Endocardial/lymphatic EC	Endocardial/lymphatic EC	ANGPT2	TEK	8.68048e-06	0	ANGPT2_TEK	ANGPT2 - TEK	ANGPT	Secreted Signaling	PMID: 20651738
Endocardial/lymphatic EC	Endothelial cells (baboon)	ANGPT2	TEK	2.6041e-05	0	ANGPT2_TEK	ANGPT2 - TEK	ANGPT	Secreted Signaling	PMID: 20651738
Endocardial/lymphatic EC	Vascular EC	ANGPT2	TEK	8.68048e-06	0	ANGPT2_TEK	ANGPT2 - TEK	ANGPT	Secreted Signaling	PMID: 20651738
Endocardial/lymphatic EC	CM	ANGPT2	ITGA5_ITGB1	8.68048e-06	0	ANGPT2_ITGA5_ITGB1	ANGPT2 - (ITGA5+ITGB1)	ANGPT	Secreted Signaling	PMID: 20651738; PMID: 25635707
Fibroblasts	Mast cells (baboon)	KITLG	KIT	8.68048e-06	0	KITL_KIT	KITL - KIT	KIT	Secreted Signaling	KEGG: hsa04080
Vascular EC	Mast cells (baboon)	KITLG	KIT	8.68048e-06	0	KITL_KIT	KITL - KIT	KIT	Secreted Signaling	KEGG: hsa04080
Endocardial/lymphatic EC	Endothelial cells (baboon)	SEMA3A	NRP1_PLXNA2	1.2276e-05	0	SEMA3A_NRP1_PLXNA2	SEMA3A - (NRP1+PLXNA2)	SEMA3	Secreted Signaling	PMID: 27533782
Endocardial/lymphatic EC	Vascular EC	SEMA3A	NRP1_PLXNA2	3.88191e-05	0	SEMA3A_NRP1_PLXNA2	SEMA3A - (NRP1+PLXNA2)	SEMA3	Secreted Signaling	PMID: 27533782
Endocardial/lymphatic EC	CM	SEMA3A	NRP1_PLXNA4	1.73608e-05	0	SEMA3A_NRP1_PLXNA4	SEMA3A - (NRP1+PLXNA4)	SEMA3	Secreted Signaling	PMID: 27533782
CM	Vascular EC	SEMA3C	NRP1_PLXNA2	9.70421e-05	0	SEMA3C_NRP1_PLXNA2	SEMA3C - (NRP1+PLXNA2)	SEMA3	Secreted Signaling	PMID: 27533782
Neuronal cells	Vascular EC	SEMA3C	NRP1_PLXNA2	9.70506e-06	0	SEMA3C_NRP1_PLXNA2	SEMA3C - (NRP1+PLXNA2)	SEMA3	Secreted Signaling	PMID: 27533782
CM	CM	SEMA3C	NRP1_PLXNA4	4.34009e-05	0	SEMA3C_NRP1_PLXNA4	SEMA3C - (NRP1+PLXNA4)	SEMA3	Secreted Signaling	PMID: 27533782
Endocardial/lymphatic EC	Endothelial cells (baboon)	SEMA3D	NRP1_PLXNA2	5.52397e-05	0	SEMA3D_NRP1_PLXNA2	SEMA3D - (NRP1+PLXNA2)	SEMA3	Secreted Signaling	PMID: 27533782
Endocardial/lymphatic EC	Vascular EC	SEMA3D	NRP1_PLXNA2	0.000174662	0	SEMA3D_NRP1_PLXNA2	SEMA3D - (NRP1+PLXNA2)	SEMA3	Secreted Signaling	PMID: 27533782
Endocardial/lymphatic EC	CM	SEMA3D	NRP1_PLXNA4	7.81189e-05	0	SEMA3D_NRP1_PLXNA4	SEMA3D - (NRP1+PLXNA4)	SEMA3	Secreted Signaling	PMID: 27533782
CM	Endocardial/lymphatic EC	SEMA3C	NRP2_PLXNA2	9.70421e-05	0	SEMA3C_NRP2_PLXNA2	SEMA3C - (NRP2+PLXNA2)	SEMA3	Secreted Signaling	PMID: 27533782
Neuronal cells	Endocardial/lymphatic EC	SEMA3C	NRP2_PLXNA2	9.70506e-06	0	SEMA3C_NRP2_PLXNA2	SEMA3C - (NRP2+PLXNA2)	SEMA3	Secreted Signaling	PMID: 27533782
CM	Vascular EC	SEMA3C	NRP2_PLXNA2	4.34009e-05	0	SEMA3C_NRP2_PLXNA2	SEMA3C - (NRP2+PLXNA2)	SEMA3	Secreted Signaling	PMID: 27533782
Neuronal cells	Vascular EC	SEMA3C	NRP2_PLXNA2	4.34026e-06	0	SEMA3C_NRP2_PLXNA2	SEMA3C - (NRP2+PLXNA2)	SEMA3	Secreted Signaling	PMID: 27533782
CM	Endocardial/lymphatic EC	SEMA3C	NRP2_PLXNA4	9.70421e-05	0	SEMA3C_NRP2_PLXNA4	SEMA3C - (NRP2+PLXNA4)	SEMA3	Secreted Signaling	PMID: 27533782
Neuronal cells	Endocardial/lymphatic EC	SEMA3C	NRP2_PLXNA4	9.70506e-06	0	SEMA3C_NRP2_PLXNA4	SEMA3C - (NRP2+PLXNA4)	SEMA3	Secreted Signaling	PMID: 27533782
Endocardial/lymphatic EC	Endocardial/lymphatic EC	SEMA3D	NRP2_PLXNA2	0.000174662	0	SEMA3D_NRP2_PLXNA2	SEMA3D - (NRP2+PLXNA2)	SEMA3	Secreted Signaling	PMID: 27533782
Endocardial/lymphatic EC	Vascular EC	SEMA3D	NRP2_PLXNA2	7.81189e-05	0	SEMA3D_NRP2_PLXNA2	SEMA3D - (NRP2+PLXNA2)	SEMA3	Secreted Signaling	PMID: 27533782
Endocardial/lymphatic EC	Endocardial/lymphatic EC	SEMA3D	NRP2_PLXNA4	0.000174662	0	SEMA3D_NRP2_PLXNA4	SEMA3D - (NRP2+PLXNA4)	SEMA3	Secreted Signaling	PMID: 27533782
CM	Endothelial cells (baboon)	SEMA3C	PLXND1	4.34009e-05	0	SEMA3C_PLXND1	SEMA3C - PLXND1	SEMA3	Secreted Signaling	PMID: 27533782
Neuronal cells	Endothelial cells (baboon)	SEMA3C	PLXND1	4.34026e-06	0	SEMA3C_PLXND1	SEMA3C - PLXND1	SEMA3	Secreted Signaling	PMID: 27533782
Fibroblasts	Endocardial/lymphatic EC	COL1A1	ITGA1_ITGB1	1.73608e-05	0	COL1A1_ITGA1_ITGB1	COL1A1 - (ITGA1+ITGB1)	COLLAGEN	ECM-Receptor	KEGG: hsa04512
Fibroblasts	Endothelial cells (baboon)	COL1A1	ITGA1_ITGB1	6.13804e-06	0	COL1A1_ITGA1_ITGB1	COL1A1 - (ITGA1+ITGB1)	COLLAGEN	ECM-Receptor	KEGG: hsa04512
Fibroblasts	Mural cells	COL1A1	ITGA1_ITGB1	1.73608e-05	0	COL1A1_ITGA1_ITGB1	COL1A1 - (ITGA1+ITGB1)	COLLAGEN	ECM-Receptor	KEGG: hsa04512
Fibroblasts	Neuronal cells	COL1A1	ITGA1_ITGB1	1.50349e-05	0	COL1A1_ITGA1_ITGB1	COL1A1 - (ITGA1+ITGB1)	COLLAGEN	ECM-Receptor	KEGG: hsa04512
Fibroblasts	Vascular EC	COL1A1	ITGA1_ITGB1	1.73608e-05	0	COL1A1_ITGA1_ITGB1	COL1A1 - (ITGA1+ITGB1)	COLLAGEN	ECM-Receptor	KEGG: hsa04512
Fibroblasts	Endocardial/lymphatic EC	COL1A2	ITGA1_ITGB1	6.94396e-05	0	COL1A2_ITGA1_ITGB1	COL1A2 - (ITGA1+ITGB1)	COLLAGEN	ECM-Receptor	KEGG: hsa04512
Fibroblasts	Endothelial cells (baboon)	COL1A2	ITGA1_ITGB1	2.45517e-05	0	COL1A2_ITGA1_ITGB1	COL1A2 - (ITGA1+ITGB1)	COLLAGEN	ECM-Receptor	KEGG: hsa04512
Fibroblasts	Mural cells	COL1A2	ITGA1_ITGB1	6.94396e-05	0	COL1A2_ITGA1_ITGB1	COL1A2 - (ITGA1+ITGB1)	COLLAGEN	ECM-Receptor	KEGG: hsa04512
Fibroblasts	Neuronal cells	COL1A2	ITGA1_ITGB1	6.0137e-05	0	COL1A2_ITGA1_ITGB1	COL1A2 - (ITGA1+ITGB1)	COLLAGEN	ECM-Receptor	KEGG: hsa04512
Fibroblasts	Vascular EC	COL1A2	ITGA1_ITGB1	6.94396e-05	0	COL1A2_ITGA1_ITGB1	COL1A2 - (ITGA1+ITGB1)	COLLAGEN	ECM-Receptor	KEGG: hsa04512
Endothelial cells (baboon)	Endocardial/lymphatic EC	COL4A1	ITGA1_ITGB1	3.4721e-05	0	COL4A1_ITGA1_ITGB1	COL4A1 - (ITGA1+ITGB1)	COLLAGEN	ECM-Receptor	KEGG: hsa04512
Endothelial cells (baboon)	Endothelial cells (baboon)	COL4A1	ITGA1_ITGB1	1.2276e-05	0	COL4A1_ITGA1_ITGB1	COL4A1 - (ITGA1+ITGB1)	COLLAGEN	ECM-Receptor	KEGG: hsa04512
Endothelial cells (baboon)	Mural cells	COL4A1	ITGA1_ITGB1	3.4721e-05	0	COL4A1_ITGA1_ITGB1	COL4A1 - (ITGA1+ITGB1)	COLLAGEN	ECM-Receptor	KEGG: hsa04512
Endothelial cells (baboon)	Neuronal cells	COL4A1	ITGA1_ITGB1	3.00694e-05	0	COL4A1_ITGA1_ITGB1	COL4A1 - (ITGA1+ITGB1)	COLLAGEN	ECM-Receptor	KEGG: hsa04512
Endothelial cells (baboon)	Vascular EC	COL4A1	ITGA1_ITGB1	3.4721e-05	0	COL4A1_ITGA1_ITGB1	COL4A1 - (ITGA1+ITGB1)	COLLAGEN	ECM-Receptor	KEGG: hsa04512
CM	Endocardial/lymphatic EC	COL4A2	ITGA1_ITGB1	6.94396e-05	0	COL4A2_ITGA1_ITGB1	COL4A2 - (ITGA1+ITGB1)	COLLAGEN	ECM-Receptor	KEGG: hsa04512
Endocardial/lymphatic EC	Endocardial/lymphatic EC	COL4A2	ITGA1_ITGB1	6.94396e-05	0	COL4A2_ITGA1_ITGB1	COL4A2 - (ITGA1+ITGB1)	COLLAGEN	ECM-Receptor	KEGG: hsa04512
Endothelial cells (baboon)	Endocardial/lymphatic EC	COL4A2	ITGA1_ITGB1	6.07602e-05	0	COL4A2_ITGA1_ITGB1	COL4A2 - (ITGA1+ITGB1)	COLLAGEN	ECM-Receptor	KEGG: hsa04512
Fibroblasts	Endocardial/lymphatic EC	COL4A2	ITGA1_ITGB1	6.94396e-05	0	COL4A2_ITGA1_ITGB1	COL4A2 - (ITGA1+ITGB1)	COLLAGEN	ECM-Receptor	KEGG: hsa04512
Mural cells	Endocardial/lymphatic EC	COL4A2	ITGA1_ITGB1	8.6798e-05	0	COL4A2_ITGA1_ITGB1	COL4A2 - (ITGA1+ITGB1)	COLLAGEN	ECM-Receptor	KEGG: hsa04512
Neuronal cells	Endocardial/lymphatic EC	COL4A2	ITGA1_ITGB1	1.73608e-05	0	COL4A2_ITGA1_ITGB1	COL4A2 - (ITGA1+ITGB1)	COLLAGEN	ECM-Receptor	KEGG: hsa04512
Vascular EC	Endocardial/lymphatic EC	COL4A2	ITGA1_ITGB1	6.94396e-05	0	COL4A2_ITGA1_ITGB1	COL4A2 - (ITGA1+ITGB1)	COLLAGEN	ECM-Receptor	KEGG: hsa04512
CM	Endothelial cells (baboon)	COL4A2	ITGA1_ITGB1	2.45517e-05	0.02	COL4A2_ITGA1_ITGB1	COL4A2 - (ITGA1+ITGB1)	COLLAGEN	ECM-Receptor	KEGG: hsa04512
Endocardial/lymphatic EC	Endothelial cells (baboon)	COL4A2	ITGA1_ITGB1	2.45517e-05	0.01	COL4A2_ITGA1_ITGB1	COL4A2 - (ITGA1+ITGB1)	COLLAGEN	ECM-Receptor	KEGG: hsa04512
Endothelial cells (baboon)	Endothelial cells (baboon)	COL4A2	ITGA1_ITGB1	2.14828e-05	0.02	COL4A2_ITGA1_ITGB1	COL4A2 - (ITGA1+ITGB1)	COLLAGEN	ECM-Receptor	KEGG: hsa04512
Fibroblasts	Endothelial cells (baboon)	COL4A2	ITGA1_ITGB1	2.45517e-05	0.02	COL4A2_ITGA1_ITGB1	COL4A2 - (ITGA1+ITGB1)	COLLAGEN	ECM-Receptor	KEGG: hsa04512
Mural cells	Endothelial cells (baboon)	COL4A2	ITGA1_ITGB1	3.06895e-05	0.02	COL4A2_ITGA1_ITGB1	COL4A2 - (ITGA1+ITGB1)	COLLAGEN	ECM-Receptor	KEGG: hsa04512
Neuronal cells	Endothelial cells (baboon)	COL4A2	ITGA1_ITGB1	6.13804e-06	0.02	COL4A2_ITGA1_ITGB1	COL4A2 - (ITGA1+ITGB1)	COLLAGEN	ECM-Receptor	KEGG: hsa04512
Vascular EC	Endothelial cells (baboon)	COL4A2	ITGA1_ITGB1	2.45517e-05	0.02	COL4A2_ITGA1_ITGB1	COL4A2 - (ITGA1+ITGB1)	COLLAGEN	ECM-Receptor	KEGG: hsa04512
CM	Mural cells	COL4A2	ITGA1_ITGB1	6.94396e-05	0	COL4A2_ITGA1_ITGB1	COL4A2 - (ITGA1+ITGB1)	COLLAGEN	ECM-Receptor	KEGG: hsa04512
Endocardial/lymphatic EC	Mural cells	COL4A2	ITGA1_ITGB1	6.94396e-05	0	COL4A2_ITGA1_ITGB1	COL4A2 - (ITGA1+ITGB1)	COLLAGEN	ECM-Receptor	KEGG: hsa04512
Endothelial cells (baboon)	Mural cells	COL4A2	ITGA1_ITGB1	6.07602e-05	0	COL4A2_ITGA1_ITGB1	COL4A2 - (ITGA1+ITGB1)	COLLAGEN	ECM-Receptor	KEGG: hsa04512
Fibroblasts	Mural cells	COL4A2	ITGA1_ITGB1	6.94396e-05	0	COL4A2_ITGA1_ITGB1	COL4A2 - (ITGA1+ITGB1)	COLLAGEN	ECM-Receptor	KEGG: hsa04512
Mural cells	Mural cells	COL4A2	ITGA1_ITGB1	8.6798e-05	0	COL4A2_ITGA1_ITGB1	COL4A2 - (ITGA1+ITGB1)	COLLAGEN	ECM-Receptor	KEGG: hsa04512
Neuronal cells	Mural cells	COL4A2	ITGA1_ITGB1	1.73608e-05	0	COL4A2_ITGA1_ITGB1	COL4A2 - (ITGA1+ITGB1)	COLLAGEN	ECM-Receptor	KEGG: hsa04512
Vascular EC	Mural cells	COL4A2	ITGA1_ITGB1	6.94396e-05	0	COL4A2_ITGA1_ITGB1	COL4A2 - (ITGA1+ITGB1)	COLLAGEN	ECM-Receptor	KEGG: hsa04512
CM	Neuronal cells	COL4A2	ITGA1_ITGB1	6.0137e-05	0	COL4A2_ITGA1_ITGB1	COL4A2 - (ITGA1+ITGB1)	COLLAGEN	ECM-Receptor	KEGG: hsa04512
Endocardial/lymphatic EC	Neuronal cells	COL4A2	ITGA1_ITGB1	6.0137e-05	0	COL4A2_ITGA1_ITGB1	COL4A2 - (ITGA1+ITGB1)	COLLAGEN	ECM-Receptor	KEGG: hsa04512
Endothelial cells (baboon)	Neuronal cells	COL4A2	ITGA1_ITGB1	5.26203e-05	0	COL4A2_ITGA1_ITGB1	COL4A2 - (ITGA1+ITGB1)	COLLAGEN	ECM-Receptor	KEGG: hsa04512
Fibroblasts	Neuronal cells	COL4A2	ITGA1_ITGB1	6.0137e-05	0	COL4A2_ITGA1_ITGB1	COL4A2 - (ITGA1+ITGB1)	COLLAGEN	ECM-Receptor	KEGG: hsa04512
Mural cells	Neuronal cells	COL4A2	ITGA1_ITGB1	7.51702e-05	0	COL4A2_ITGA1_ITGB1	COL4A2 - (ITGA1+ITGB1)	COLLAGEN	ECM-Receptor	KEGG: hsa04512
Neuronal cells	Neuronal cells	COL4A2	ITGA1_ITGB1	1.50349e-05	0	COL4A2_ITGA1_ITGB1	COL4A2 - (ITGA1+ITGB1)	COLLAGEN	ECM-Receptor	KEGG: hsa04512
Vascular EC	Neuronal cells	COL4A2	ITGA1_ITGB1	6.0137e-05	0	COL4A2_ITGA1_ITGB1	COL4A2 - (ITGA1+ITGB1)	COLLAGEN	ECM-Receptor	KEGG: hsa04512
CM	Vascular EC	COL4A2	ITGA1_ITGB1	6.94396e-05	0	COL4A2_ITGA1_ITGB1	COL4A2 - (ITGA1+ITGB1)	COLLAGEN	ECM-Receptor	KEGG: hsa04512
Endocardial/lymphatic EC	Vascular EC	COL4A2	ITGA1_ITGB1	6.94396e-05	0	COL4A2_ITGA1_ITGB1	COL4A2 - (ITGA1+ITGB1)	COLLAGEN	ECM-Receptor	KEGG: hsa04512
Endothelial cells (baboon)	Vascular EC	COL4A2	ITGA1_ITGB1	6.07602e-05	0	COL4A2_ITGA1_ITGB1	COL4A2 - (ITGA1+ITGB1)	COLLAGEN	ECM-Receptor	KEGG: hsa04512
Fibroblasts	Vascular EC	COL4A2	ITGA1_ITGB1	6.94396e-05	0	COL4A2_ITGA1_ITGB1	COL4A2 - (ITGA1+ITGB1)	COLLAGEN	ECM-Receptor	KEGG: hsa04512
Mural cells	Vascular EC	COL4A2	ITGA1_ITGB1	8.6798e-05	0	COL4A2_ITGA1_ITGB1	COL4A2 - (ITGA1+ITGB1)	COLLAGEN	ECM-Receptor	KEGG: hsa04512
Neuronal cells	Vascular EC	COL4A2	ITGA1_ITGB1	1.73608e-05	0	COL4A2_ITGA1_ITGB1	COL4A2 - (ITGA1+ITGB1)	COLLAGEN	ECM-Receptor	KEGG: hsa04512
Vascular EC	Vascular EC	COL4A2	ITGA1_ITGB1	6.94396e-05	0	COL4A2_ITGA1_ITGB1	COL4A2 - (ITGA1+ITGB1)	COLLAGEN	ECM-Receptor	KEGG: hsa04512
Fibroblasts	Endocardial/lymphatic EC	COL6A1	ITGA1_ITGB1	1.73608e-05	0	COL6A1_ITGA1_ITGB1	COL6A1 - (ITGA1+ITGB1)	COLLAGEN	ECM-Receptor	KEGG: hsa04512
Fibroblasts	Endothelial cells (baboon)	COL6A1	ITGA1_ITGB1	6.13804e-06	0	COL6A1_ITGA1_ITGB1	COL6A1 - (ITGA1+ITGB1)	COLLAGEN	ECM-Receptor	KEGG: hsa04512
Fibroblasts	Mural cells	COL6A1	ITGA1_ITGB1	1.73608e-05	0	COL6A1_ITGA1_ITGB1	COL6A1 - (ITGA1+ITGB1)	COLLAGEN	ECM-Receptor	KEGG: hsa04512
Fibroblasts	Neuronal cells	COL6A1	ITGA1_ITGB1	1.50349e-05	0	COL6A1_ITGA1_ITGB1	COL6A1 - (ITGA1+ITGB1)	COLLAGEN	ECM-Receptor	KEGG: hsa04512
Fibroblasts	Vascular EC	COL6A1	ITGA1_ITGB1	1.73608e-05	0	COL6A1_ITGA1_ITGB1	COL6A1 - (ITGA1+ITGB1)	COLLAGEN	ECM-Receptor	KEGG: hsa04512
Fibroblasts	Endocardial/lymphatic EC	COL6A2	ITGA1_ITGB1	1.73608e-05	0	COL6A2_ITGA1_ITGB1	COL6A2 - (ITGA1+ITGB1)	COLLAGEN	ECM-Receptor	KEGG: hsa04512
Fibroblasts	Endothelial cells (baboon)	COL6A2	ITGA1_ITGB1	6.13804e-06	0	COL6A2_ITGA1_ITGB1	COL6A2 - (ITGA1+ITGB1)	COLLAGEN	ECM-Receptor	KEGG: hsa04512
Fibroblasts	Mural cells	COL6A2	ITGA1_ITGB1	1.73608e-05	0	COL6A2_ITGA1_ITGB1	COL6A2 - (ITGA1+ITGB1)	COLLAGEN	ECM-Receptor	KEGG: hsa04512
Fibroblasts	Neuronal cells	COL6A2	ITGA1_ITGB1	1.50349e-05	0	COL6A2_ITGA1_ITGB1	COL6A2 - (ITGA1+ITGB1)	COLLAGEN	ECM-Receptor	KEGG: hsa04512
Fibroblasts	Vascular EC	COL6A2	ITGA1_ITGB1	1.73608e-05	0	COL6A2_ITGA1_ITGB1	COL6A2 - (ITGA1+ITGB1)	COLLAGEN	ECM-Receptor	KEGG: hsa04512
Fibroblasts	Endocardial/lymphatic EC	COL6A3	ITGA1_ITGB1	6.94396e-05	0	COL6A3_ITGA1_ITGB1	COL6A3 - (ITGA1+ITGB1)	COLLAGEN	ECM-Receptor	KEGG: hsa04512
Fibroblasts	Endothelial cells (baboon)	COL6A3	ITGA1_ITGB1	2.45517e-05	0	COL6A3_ITGA1_ITGB1	COL6A3 - (ITGA1+ITGB1)	COLLAGEN	ECM-Receptor	KEGG: hsa04512
Fibroblasts	Mural cells	COL6A3	ITGA1_ITGB1	6.94396e-05	0	COL6A3_ITGA1_ITGB1	COL6A3 - (ITGA1+ITGB1)	COLLAGEN	ECM-Receptor	KEGG: hsa04512
Fibroblasts	Neuronal cells	COL6A3	ITGA1_ITGB1	6.0137e-05	0	COL6A3_ITGA1_ITGB1	COL6A3 - (ITGA1+ITGB1)	COLLAGEN	ECM-Receptor	KEGG: hsa04512
Fibroblasts	Vascular EC	COL6A3	ITGA1_ITGB1	6.94396e-05	0	COL6A3_ITGA1_ITGB1	COL6A3 - (ITGA1+ITGB1)	COLLAGEN	ECM-Receptor	KEGG: hsa04512
Fibroblasts	Endocardial/lymphatic EC	COL6A6	ITGA1_ITGB1	1.73608e-05	0	COL6A6_ITGA1_ITGB1	COL6A6 - (ITGA1+ITGB1)	COLLAGEN	ECM-Receptor	KEGG: hsa04512
Fibroblasts	Endothelial cells (baboon)	COL6A6	ITGA1_ITGB1	6.13804e-06	0	COL6A6_ITGA1_ITGB1	COL6A6 - (ITGA1+ITGB1)	COLLAGEN	ECM-Receptor	KEGG: hsa04512
Fibroblasts	Mural cells	COL6A6	ITGA1_ITGB1	1.73608e-05	0	COL6A6_ITGA1_ITGB1	COL6A6 - (ITGA1+ITGB1)	COLLAGEN	ECM-Receptor	KEGG: hsa04512
Fibroblasts	Neuronal cells	COL6A6	ITGA1_ITGB1	1.50349e-05	0	COL6A6_ITGA1_ITGB1	COL6A6 - (ITGA1+ITGB1)	COLLAGEN	ECM-Receptor	KEGG: hsa04512
Fibroblasts	Vascular EC	COL6A6	ITGA1_ITGB1	1.73608e-05	0	COL6A6_ITGA1_ITGB1	COL6A6 - (ITGA1+ITGB1)	COLLAGEN	ECM-Receptor	KEGG: hsa04512
Fibroblasts	CM	FN1	ITGA5_ITGB1	8.68048e-06	0	FN1_ITGA5_ITGB1	FN1 - (ITGA5+ITGB1)	FN1	ECM-Receptor	KEGG: hsa04512
CM	Endocardial/lymphatic EC	LAMA4	ITGA1_ITGB1	6.94396e-05	0	LAMA4_ITGA1_ITGB1	LAMA4 - (ITGA1+ITGB1)	LAMININ	ECM-Receptor	KEGG: hsa04512
Endocardial/lymphatic EC	Endocardial/lymphatic EC	LAMA4	ITGA1_ITGB1	0.000156226	0	LAMA4_ITGA1_ITGB1	LAMA4 - (ITGA1+ITGB1)	LAMININ	ECM-Receptor	KEGG: hsa04512
Fibroblasts	Endocardial/lymphatic EC	LAMA4	ITGA1_ITGB1	8.6798e-05	0	LAMA4_ITGA1_ITGB1	LAMA4 - (ITGA1+ITGB1)	LAMININ	ECM-Receptor	KEGG: hsa04512
Mural cells	Endocardial/lymphatic EC	LAMA4	ITGA1_ITGB1	1.73608e-05	0	LAMA4_ITGA1_ITGB1	LAMA4 - (ITGA1+ITGB1)	LAMININ	ECM-Receptor	KEGG: hsa04512
Neuronal cells	Endocardial/lymphatic EC	LAMA4	ITGA1_ITGB1	1.73608e-05	0	LAMA4_ITGA1_ITGB1	LAMA4 - (ITGA1+ITGB1)	LAMININ	ECM-Receptor	KEGG: hsa04512
Vascular EC	Endocardial/lymphatic EC	LAMA4	ITGA1_ITGB1	1.73608e-05	0	LAMA4_ITGA1_ITGB1	LAMA4 - (ITGA1+ITGB1)	LAMININ	ECM-Receptor	KEGG: hsa04512
CM	Endothelial cells (baboon)	LAMA4	ITGA1_ITGB1	2.45517e-05	0.02	LAMA4_ITGA1_ITGB1	LAMA4 - (ITGA1+ITGB1)	LAMININ	ECM-Receptor	KEGG: hsa04512
Endocardial/lymphatic EC	Endothelial cells (baboon)	LAMA4	ITGA1_ITGB1	5.52397e-05	0	LAMA4_ITGA1_ITGB1	LAMA4 - (ITGA1+ITGB1)	LAMININ	ECM-Receptor	KEGG: hsa04512
Fibroblasts	Endothelial cells (baboon)	LAMA4	ITGA1_ITGB1	3.06895e-05	0.02	LAMA4_ITGA1_ITGB1	LAMA4 - (ITGA1+ITGB1)	LAMININ	ECM-Receptor	KEGG: hsa04512
Mural cells	Endothelial cells (baboon)	LAMA4	ITGA1_ITGB1	6.13804e-06	0.02	LAMA4_ITGA1_ITGB1	LAMA4 - (ITGA1+ITGB1)	LAMININ	ECM-Receptor	KEGG: hsa04512
Neuronal cells	Endothelial cells (baboon)	LAMA4	ITGA1_ITGB1	6.13804e-06	0.02	LAMA4_ITGA1_ITGB1	LAMA4 - (ITGA1+ITGB1)	LAMININ	ECM-Receptor	KEGG: hsa04512
Vascular EC	Endothelial cells (baboon)	LAMA4	ITGA1_ITGB1	6.13804e-06	0.02	LAMA4_ITGA1_ITGB1	LAMA4 - (ITGA1+ITGB1)	LAMININ	ECM-Receptor	KEGG: hsa04512
CM	Mural cells	LAMA4	ITGA1_ITGB1	6.94396e-05	0	LAMA4_ITGA1_ITGB1	LAMA4 - (ITGA1+ITGB1)	LAMININ	ECM-Receptor	KEGG: hsa04512
Endocardial/lymphatic EC	Mural cells	LAMA4	ITGA1_ITGB1	0.000156226	0	LAMA4_ITGA1_ITGB1	LAMA4 - (ITGA1+ITGB1)	LAMININ	ECM-Receptor	KEGG: hsa04512
Fibroblasts	Mural cells	LAMA4	ITGA1_ITGB1	8.6798e-05	0	LAMA4_ITGA1_ITGB1	LAMA4 - (ITGA1+ITGB1)	LAMININ	ECM-Receptor	KEGG: hsa04512
Mural cells	Mural cells	LAMA4	ITGA1_ITGB1	1.73608e-05	0	LAMA4_ITGA1_ITGB1	LAMA4 - (ITGA1+ITGB1)	LAMININ	ECM-Receptor	KEGG: hsa04512
Neuronal cells	Mural cells	LAMA4	ITGA1_ITGB1	1.73608e-05	0	LAMA4_ITGA1_ITGB1	LAMA4 - (ITGA1+ITGB1)	LAMININ	ECM-Receptor	KEGG: hsa04512
Vascular EC	Mural cells	LAMA4	ITGA1_ITGB1	1.73608e-05	0	LAMA4_ITGA1_ITGB1	LAMA4 - (ITGA1+ITGB1)	LAMININ	ECM-Receptor	KEGG: hsa04512
CM	Neuronal cells	LAMA4	ITGA1_ITGB1	6.0137e-05	0	LAMA4_ITGA1_ITGB1	LAMA4 - (ITGA1+ITGB1)	LAMININ	ECM-Receptor	KEGG: hsa04512
Endocardial/lymphatic EC	Neuronal cells	LAMA4	ITGA1_ITGB1	0.000135298	0	LAMA4_ITGA1_ITGB1	LAMA4 - (ITGA1+ITGB1)	LAMININ	ECM-Receptor	KEGG: hsa04512
Fibroblasts	Neuronal cells	LAMA4	ITGA1_ITGB1	7.51702e-05	0	LAMA4_ITGA1_ITGB1	LAMA4 - (ITGA1+ITGB1)	LAMININ	ECM-Receptor	KEGG: hsa04512
Mural cells	Neuronal cells	LAMA4	ITGA1_ITGB1	1.50349e-05	0	LAMA4_ITGA1_ITGB1	LAMA4 - (ITGA1+ITGB1)	LAMININ	ECM-Receptor	KEGG: hsa04512
Neuronal cells	Neuronal cells	LAMA4	ITGA1_ITGB1	1.50349e-05	0	LAMA4_ITGA1_ITGB1	LAMA4 - (ITGA1+ITGB1)	LAMININ	ECM-Receptor	KEGG: hsa04512
Vascular EC	Neuronal cells	LAMA4	ITGA1_ITGB1	1.50349e-05	0	LAMA4_ITGA1_ITGB1	LAMA4 - (ITGA1+ITGB1)	LAMININ	ECM-Receptor	KEGG: hsa04512
CM	Vascular EC	LAMA4	ITGA1_ITGB1	6.94396e-05	0	LAMA4_ITGA1_ITGB1	LAMA4 - (ITGA1+ITGB1)	LAMININ	ECM-Receptor	KEGG: hsa04512
Endocardial/lymphatic EC	Vascular EC	LAMA4	ITGA1_ITGB1	0.000156226	0	LAMA4_ITGA1_ITGB1	LAMA4 - (ITGA1+ITGB1)	LAMININ	ECM-Receptor	KEGG: hsa04512
Fibroblasts	Vascular EC	LAMA4	ITGA1_ITGB1	8.6798e-05	0	LAMA4_ITGA1_ITGB1	LAMA4 - (ITGA1+ITGB1)	LAMININ	ECM-Receptor	KEGG: hsa04512
Mural cells	Vascular EC	LAMA4	ITGA1_ITGB1	1.73608e-05	0	LAMA4_ITGA1_ITGB1	LAMA4 - (ITGA1+ITGB1)	LAMININ	ECM-Receptor	KEGG: hsa04512
Neuronal cells	Vascular EC	LAMA4	ITGA1_ITGB1	1.73608e-05	0	LAMA4_ITGA1_ITGB1	LAMA4 - (ITGA1+ITGB1)	LAMININ	ECM-Receptor	KEGG: hsa04512
Vascular EC	Vascular EC	LAMA4	ITGA1_ITGB1	1.73608e-05	0	LAMA4_ITGA1_ITGB1	LAMA4 - (ITGA1+ITGB1)	LAMININ	ECM-Receptor	KEGG: hsa04512
Endocardial/lymphatic EC	Endocardial/lymphatic EC	LAMB1	ITGA1_ITGB1	1.73608e-05	0	LAMB1_ITGA1_ITGB1	LAMB1 - (ITGA1+ITGB1)	LAMININ	ECM-Receptor	KEGG: hsa04512
Fibroblasts	Endocardial/lymphatic EC	LAMB1	ITGA1_ITGB1	1.73608e-05	0	LAMB1_ITGA1_ITGB1	LAMB1 - (ITGA1+ITGB1)	LAMININ	ECM-Receptor	KEGG: hsa04512
Neuronal cells	Endocardial/lymphatic EC	LAMB1	ITGA1_ITGB1	1.73608e-05	0	LAMB1_ITGA1_ITGB1	LAMB1 - (ITGA1+ITGB1)	LAMININ	ECM-Receptor	KEGG: hsa04512
Vascular EC	Endocardial/lymphatic EC	LAMB1	ITGA1_ITGB1	1.73608e-05	0	LAMB1_ITGA1_ITGB1	LAMB1 - (ITGA1+ITGB1)	LAMININ	ECM-Receptor	KEGG: hsa04512
Endocardial/lymphatic EC	Endothelial cells (baboon)	LAMB1	ITGA1_ITGB1	6.13804e-06	0	LAMB1_ITGA1_ITGB1	LAMB1 - (ITGA1+ITGB1)	LAMININ	ECM-Receptor	KEGG: hsa04512
Fibroblasts	Endothelial cells (baboon)	LAMB1	ITGA1_ITGB1	6.13804e-06	0	LAMB1_ITGA1_ITGB1	LAMB1 - (ITGA1+ITGB1)	LAMININ	ECM-Receptor	KEGG: hsa04512
Neuronal cells	Endothelial cells (baboon)	LAMB1	ITGA1_ITGB1	6.13804e-06	0	LAMB1_ITGA1_ITGB1	LAMB1 - (ITGA1+ITGB1)	LAMININ	ECM-Receptor	KEGG: hsa04512
Vascular EC	Endothelial cells (baboon)	LAMB1	ITGA1_ITGB1	6.13804e-06	0	LAMB1_ITGA1_ITGB1	LAMB1 - (ITGA1+ITGB1)	LAMININ	ECM-Receptor	KEGG: hsa04512
Endocardial/lymphatic EC	Mural cells	LAMB1	ITGA1_ITGB1	1.73608e-05	0	LAMB1_ITGA1_ITGB1	LAMB1 - (ITGA1+ITGB1)	LAMININ	ECM-Receptor	KEGG: hsa04512
Fibroblasts	Mural cells	LAMB1	ITGA1_ITGB1	1.73608e-05	0	LAMB1_ITGA1_ITGB1	LAMB1 - (ITGA1+ITGB1)	LAMININ	ECM-Receptor	KEGG: hsa04512
Neuronal cells	Mural cells	LAMB1	ITGA1_ITGB1	1.73608e-05	0	LAMB1_ITGA1_ITGB1	LAMB1 - (ITGA1+ITGB1)	LAMININ	ECM-Receptor	KEGG: hsa04512
Vascular EC	Mural cells	LAMB1	ITGA1_ITGB1	1.73608e-05	0	LAMB1_ITGA1_ITGB1	LAMB1 - (ITGA1+ITGB1)	LAMININ	ECM-Receptor	KEGG: hsa04512
Endocardial/lymphatic EC	Neuronal cells	LAMB1	ITGA1_ITGB1	1.50349e-05	0	LAMB1_ITGA1_ITGB1	LAMB1 - (ITGA1+ITGB1)	LAMININ	ECM-Receptor	KEGG: hsa04512
Fibroblasts	Neuronal cells	LAMB1	ITGA1_ITGB1	1.50349e-05	0	LAMB1_ITGA1_ITGB1	LAMB1 - (ITGA1+ITGB1)	LAMININ	ECM-Receptor	KEGG: hsa04512
Neuronal cells	Neuronal cells	LAMB1	ITGA1_ITGB1	1.50349e-05	0	LAMB1_ITGA1_ITGB1	LAMB1 - (ITGA1+ITGB1)	LAMININ	ECM-Receptor	KEGG: hsa04512
Vascular EC	Neuronal cells	LAMB1	ITGA1_ITGB1	1.50349e-05	0	LAMB1_ITGA1_ITGB1	LAMB1 - (ITGA1+ITGB1)	LAMININ	ECM-Receptor	KEGG: hsa04512
Endocardial/lymphatic EC	Vascular EC	LAMB1	ITGA1_ITGB1	1.73608e-05	0	LAMB1_ITGA1_ITGB1	LAMB1 - (ITGA1+ITGB1)	LAMININ	ECM-Receptor	KEGG: hsa04512
Fibroblasts	Vascular EC	LAMB1	ITGA1_ITGB1	1.73608e-05	0	LAMB1_ITGA1_ITGB1	LAMB1 - (ITGA1+ITGB1)	LAMININ	ECM-Receptor	KEGG: hsa04512
Neuronal cells	Vascular EC	LAMB1	ITGA1_ITGB1	1.73608e-05	0	LAMB1_ITGA1_ITGB1	LAMB1 - (ITGA1+ITGB1)	LAMININ	ECM-Receptor	KEGG: hsa04512
Vascular EC	Vascular EC	LAMB1	ITGA1_ITGB1	1.73608e-05	0	LAMB1_ITGA1_ITGB1	LAMB1 - (ITGA1+ITGB1)	LAMININ	ECM-Receptor	KEGG: hsa04512
CM	Endocardial/lymphatic EC	LAMC1	ITGA1_ITGB1	8.6798e-05	0	LAMC1_ITGA1_ITGB1	LAMC1 - (ITGA1+ITGB1)	LAMININ	ECM-Receptor	KEGG: hsa04512
Endocardial/lymphatic EC	Endocardial/lymphatic EC	LAMC1	ITGA1_ITGB1	8.6798e-05	0	LAMC1_ITGA1_ITGB1	LAMC1 - (ITGA1+ITGB1)	LAMININ	ECM-Receptor	KEGG: hsa04512
Endothelial cells (baboon)	Endocardial/lymphatic EC	LAMC1	ITGA1_ITGB1	8.68048e-06	0	LAMC1_ITGA1_ITGB1	LAMC1 - (ITGA1+ITGB1)	LAMININ	ECM-Receptor	KEGG: hsa04512
Fibroblasts	Endocardial/lymphatic EC	LAMC1	ITGA1_ITGB1	0.000225644	0	LAMC1_ITGA1_ITGB1	LAMC1 - (ITGA1+ITGB1)	LAMININ	ECM-Receptor	KEGG: hsa04512
Mural cells	Endocardial/lymphatic EC	LAMC1	ITGA1_ITGB1	1.73608e-05	0	LAMC1_ITGA1_ITGB1	LAMC1 - (ITGA1+ITGB1)	LAMININ	ECM-Receptor	KEGG: hsa04512
Neuronal cells	Endocardial/lymphatic EC	LAMC1	ITGA1_ITGB1	1.73608e-05	0	LAMC1_ITGA1_ITGB1	LAMC1 - (ITGA1+ITGB1)	LAMININ	ECM-Receptor	KEGG: hsa04512
Vascular EC	Endocardial/lymphatic EC	LAMC1	ITGA1_ITGB1	1.73608e-05	0	LAMC1_ITGA1_ITGB1	LAMC1 - (ITGA1+ITGB1)	LAMININ	ECM-Receptor	KEGG: hsa04512
CM	Endothelial cells (baboon)	LAMC1	ITGA1_ITGB1	3.06895e-05	0.02	LAMC1_ITGA1_ITGB1	LAMC1 - (ITGA1+ITGB1)	LAMININ	ECM-Receptor	KEGG: hsa04512
Endocardial/lymphatic EC	Endothelial cells (baboon)	LAMC1	ITGA1_ITGB1	3.06895e-05	0.02	LAMC1_ITGA1_ITGB1	LAMC1 - (ITGA1+ITGB1)	LAMININ	ECM-Receptor	KEGG: hsa04512
Endothelial cells (baboon)	Endothelial cells (baboon)	LAMC1	ITGA1_ITGB1	3.06903e-06	0.02	LAMC1_ITGA1_ITGB1	LAMC1 - (ITGA1+ITGB1)	LAMININ	ECM-Receptor	KEGG: hsa04512
Fibroblasts	Endothelial cells (baboon)	LAMC1	ITGA1_ITGB1	7.97887e-05	0	LAMC1_ITGA1_ITGB1	LAMC1 - (ITGA1+ITGB1)	LAMININ	ECM-Receptor	KEGG: hsa04512
Mural cells	Endothelial cells (baboon)	LAMC1	ITGA1_ITGB1	6.13804e-06	0.02	LAMC1_ITGA1_ITGB1	LAMC1 - (ITGA1+ITGB1)	LAMININ	ECM-Receptor	KEGG: hsa04512
Neuronal cells	Endothelial cells (baboon)	LAMC1	ITGA1_ITGB1	6.13804e-06	0.02	LAMC1_ITGA1_ITGB1	LAMC1 - (ITGA1+ITGB1)	LAMININ	ECM-Receptor	KEGG: hsa04512
Vascular EC	Endothelial cells (baboon)	LAMC1	ITGA1_ITGB1	6.13804e-06	0.02	LAMC1_ITGA1_ITGB1	LAMC1 - (ITGA1+ITGB1)	LAMININ	ECM-Receptor	KEGG: hsa04512
CM	Mural cells	LAMC1	ITGA1_ITGB1	8.6798e-05	0	LAMC1_ITGA1_ITGB1	LAMC1 - (ITGA1+ITGB1)	LAMININ	ECM-Receptor	KEGG: hsa04512
Endocardial/lymphatic EC	Mural cells	LAMC1	ITGA1_ITGB1	8.6798e-05	0	LAMC1_ITGA1_ITGB1	LAMC1 - (ITGA1+ITGB1)	LAMININ	ECM-Receptor	KEGG: hsa04512
Endothelial cells (baboon)	Mural cells	LAMC1	ITGA1_ITGB1	8.68048e-06	0	LAMC1_ITGA1_ITGB1	LAMC1 - (ITGA1+ITGB1)	LAMININ	ECM-Receptor	KEGG: hsa04512
Fibroblasts	Mural cells	LAMC1	ITGA1_ITGB1	0.000225644	0	LAMC1_ITGA1_ITGB1	LAMC1 - (ITGA1+ITGB1)	LAMININ	ECM-Receptor	KEGG: hsa04512
Mural cells	Mural cells	LAMC1	ITGA1_ITGB1	1.73608e-05	0	LAMC1_ITGA1_ITGB1	LAMC1 - (ITGA1+ITGB1)	LAMININ	ECM-Receptor	KEGG: hsa04512
Neuronal cells	Mural cells	LAMC1	ITGA1_ITGB1	1.73608e-05	0	LAMC1_ITGA1_ITGB1	LAMC1 - (ITGA1+ITGB1)	LAMININ	ECM-Receptor	KEGG: hsa04512
Vascular EC	Mural cells	LAMC1	ITGA1_ITGB1	1.73608e-05	0	LAMC1_ITGA1_ITGB1	LAMC1 - (ITGA1+ITGB1)	LAMININ	ECM-Receptor	KEGG: hsa04512
CM	Neuronal cells	LAMC1	ITGA1_ITGB1	7.51702e-05	0	LAMC1_ITGA1_ITGB1	LAMC1 - (ITGA1+ITGB1)	LAMININ	ECM-Receptor	KEGG: hsa04512
Endocardial/lymphatic EC	Neuronal cells	LAMC1	ITGA1_ITGB1	7.51702e-05	0	LAMC1_ITGA1_ITGB1	LAMC1 - (ITGA1+ITGB1)	LAMININ	ECM-Receptor	KEGG: hsa04512
Endothelial cells (baboon)	Neuronal cells	LAMC1	ITGA1_ITGB1	7.51753e-06	0	LAMC1_ITGA1_ITGB1	LAMC1 - (ITGA1+ITGB1)	LAMININ	ECM-Receptor	KEGG: hsa04512
Fibroblasts	Neuronal cells	LAMC1	ITGA1_ITGB1	0.000195419	0	LAMC1_ITGA1_ITGB1	LAMC1 - (ITGA1+ITGB1)	LAMININ	ECM-Receptor	KEGG: hsa04512
Mural cells	Neuronal cells	LAMC1	ITGA1_ITGB1	1.50349e-05	0	LAMC1_ITGA1_ITGB1	LAMC1 - (ITGA1+ITGB1)	LAMININ	ECM-Receptor	KEGG: hsa04512
Neuronal cells	Neuronal cells	LAMC1	ITGA1_ITGB1	1.50349e-05	0	LAMC1_ITGA1_ITGB1	LAMC1 - (ITGA1+ITGB1)	LAMININ	ECM-Receptor	KEGG: hsa04512
Vascular EC	Neuronal cells	LAMC1	ITGA1_ITGB1	1.50349e-05	0	LAMC1_ITGA1_ITGB1	LAMC1 - (ITGA1+ITGB1)	LAMININ	ECM-Receptor	KEGG: hsa04512
CM	Vascular EC	LAMC1	ITGA1_ITGB1	8.6798e-05	0	LAMC1_ITGA1_ITGB1	LAMC1 - (ITGA1+ITGB1)	LAMININ	ECM-Receptor	KEGG: hsa04512
Endocardial/lymphatic EC	Vascular EC	LAMC1	ITGA1_ITGB1	8.6798e-05	0	LAMC1_ITGA1_ITGB1	LAMC1 - (ITGA1+ITGB1)	LAMININ	ECM-Receptor	KEGG: hsa04512
Endothelial cells (baboon)	Vascular EC	LAMC1	ITGA1_ITGB1	8.68048e-06	0	LAMC1_ITGA1_ITGB1	LAMC1 - (ITGA1+ITGB1)	LAMININ	ECM-Receptor	KEGG: hsa04512
Fibroblasts	Vascular EC	LAMC1	ITGA1_ITGB1	0.000225644	0	LAMC1_ITGA1_ITGB1	LAMC1 - (ITGA1+ITGB1)	LAMININ	ECM-Receptor	KEGG: hsa04512
Mural cells	Vascular EC	LAMC1	ITGA1_ITGB1	1.73608e-05	0	LAMC1_ITGA1_ITGB1	LAMC1 - (ITGA1+ITGB1)	LAMININ	ECM-Receptor	KEGG: hsa04512
Neuronal cells	Vascular EC	LAMC1	ITGA1_ITGB1	1.73608e-05	0	LAMC1_ITGA1_ITGB1	LAMC1 - (ITGA1+ITGB1)	LAMININ	ECM-Receptor	KEGG: hsa04512
Vascular EC	Vascular EC	LAMC1	ITGA1_ITGB1	1.73608e-05	0	LAMC1_ITGA1_ITGB1	LAMC1 - (ITGA1+ITGB1)	LAMININ	ECM-Receptor	KEGG: hsa04512
CM	Endothelial cells (baboon)	LAMA4	ITGA6_ITGB1	2.45517e-05	0	LAMA4_ITGA6_ITGB1	LAMA4 - (ITGA6+ITGB1)	LAMININ	ECM-Receptor	KEGG: hsa04512
Endocardial/lymphatic EC	Endothelial cells (baboon)	LAMA4	ITGA6_ITGB1	5.52397e-05	0	LAMA4_ITGA6_ITGB1	LAMA4 - (ITGA6+ITGB1)	LAMININ	ECM-Receptor	KEGG: hsa04512
Fibroblasts	Endothelial cells (baboon)	LAMA4	ITGA6_ITGB1	3.06895e-05	0	LAMA4_ITGA6_ITGB1	LAMA4 - (ITGA6+ITGB1)	LAMININ	ECM-Receptor	KEGG: hsa04512
Mural cells	Endothelial cells (baboon)	LAMA4	ITGA6_ITGB1	6.13804e-06	0.01	LAMA4_ITGA6_ITGB1	LAMA4 - (ITGA6+ITGB1)	LAMININ	ECM-Receptor	KEGG: hsa04512
Neuronal cells	Endothelial cells (baboon)	LAMA4	ITGA6_ITGB1	6.13804e-06	0.01	LAMA4_ITGA6_ITGB1	LAMA4 - (ITGA6+ITGB1)	LAMININ	ECM-Receptor	KEGG: hsa04512
Vascular EC	Endothelial cells (baboon)	LAMA4	ITGA6_ITGB1	6.13804e-06	0.01	LAMA4_ITGA6_ITGB1	LAMA4 - (ITGA6+ITGB1)	LAMININ	ECM-Receptor	KEGG: hsa04512
CM	Vascular EC	LAMA4	ITGA6_ITGB1	3.4721e-05	0	LAMA4_ITGA6_ITGB1	LAMA4 - (ITGA6+ITGB1)	LAMININ	ECM-Receptor	KEGG: hsa04512
Endocardial/lymphatic EC	Vascular EC	LAMA4	ITGA6_ITGB1	7.81189e-05	0	LAMA4_ITGA6_ITGB1	LAMA4 - (ITGA6+ITGB1)	LAMININ	ECM-Receptor	KEGG: hsa04512
Fibroblasts	Vascular EC	LAMA4	ITGA6_ITGB1	4.34009e-05	0	LAMA4_ITGA6_ITGB1	LAMA4 - (ITGA6+ITGB1)	LAMININ	ECM-Receptor	KEGG: hsa04512
Mural cells	Vascular EC	LAMA4	ITGA6_ITGB1	8.68048e-06	0	LAMA4_ITGA6_ITGB1	LAMA4 - (ITGA6+ITGB1)	LAMININ	ECM-Receptor	KEGG: hsa04512
Neuronal cells	Vascular EC	LAMA4	ITGA6_ITGB1	8.68048e-06	0	LAMA4_ITGA6_ITGB1	LAMA4 - (ITGA6+ITGB1)	LAMININ	ECM-Receptor	KEGG: hsa04512
Vascular EC	Vascular EC	LAMA4	ITGA6_ITGB1	8.68048e-06	0	LAMA4_ITGA6_ITGB1	LAMA4 - (ITGA6+ITGB1)	LAMININ	ECM-Receptor	KEGG: hsa04512
Endocardial/lymphatic EC	Endothelial cells (baboon)	LAMB1	ITGA6_ITGB1	6.13804e-06	0	LAMB1_ITGA6_ITGB1	LAMB1 - (ITGA6+ITGB1)	LAMININ	ECM-Receptor	KEGG: hsa04512
Fibroblasts	Endothelial cells (baboon)	LAMB1	ITGA6_ITGB1	6.13804e-06	0	LAMB1_ITGA6_ITGB1	LAMB1 - (ITGA6+ITGB1)	LAMININ	ECM-Receptor	KEGG: hsa04512
Neuronal cells	Endothelial cells (baboon)	LAMB1	ITGA6_ITGB1	6.13804e-06	0	LAMB1_ITGA6_ITGB1	LAMB1 - (ITGA6+ITGB1)	LAMININ	ECM-Receptor	KEGG: hsa04512
Vascular EC	Endothelial cells (baboon)	LAMB1	ITGA6_ITGB1	6.13804e-06	0	LAMB1_ITGA6_ITGB1	LAMB1 - (ITGA6+ITGB1)	LAMININ	ECM-Receptor	KEGG: hsa04512
Endocardial/lymphatic EC	Vascular EC	LAMB1	ITGA6_ITGB1	8.68048e-06	0	LAMB1_ITGA6_ITGB1	LAMB1 - (ITGA6+ITGB1)	LAMININ	ECM-Receptor	KEGG: hsa04512
Fibroblasts	Vascular EC	LAMB1	ITGA6_ITGB1	8.68048e-06	0	LAMB1_ITGA6_ITGB1	LAMB1 - (ITGA6+ITGB1)	LAMININ	ECM-Receptor	KEGG: hsa04512
Neuronal cells	Vascular EC	LAMB1	ITGA6_ITGB1	8.68048e-06	0	LAMB1_ITGA6_ITGB1	LAMB1 - (ITGA6+ITGB1)	LAMININ	ECM-Receptor	KEGG: hsa04512
Vascular EC	Vascular EC	LAMB1	ITGA6_ITGB1	8.68048e-06	0	LAMB1_ITGA6_ITGB1	LAMB1 - (ITGA6+ITGB1)	LAMININ	ECM-Receptor	KEGG: hsa04512
CM	Endothelial cells (baboon)	LAMC1	ITGA6_ITGB1	3.06895e-05	0	LAMC1_ITGA6_ITGB1	LAMC1 - (ITGA6+ITGB1)	LAMININ	ECM-Receptor	KEGG: hsa04512
Endocardial/lymphatic EC	Endothelial cells (baboon)	LAMC1	ITGA6_ITGB1	3.06895e-05	0	LAMC1_ITGA6_ITGB1	LAMC1 - (ITGA6+ITGB1)	LAMININ	ECM-Receptor	KEGG: hsa04512
Endothelial cells (baboon)	Endothelial cells (baboon)	LAMC1	ITGA6_ITGB1	3.06903e-06	0.01	LAMC1_ITGA6_ITGB1	LAMC1 - (ITGA6+ITGB1)	LAMININ	ECM-Receptor	KEGG: hsa04512
Fibroblasts	Endothelial cells (baboon)	LAMC1	ITGA6_ITGB1	7.97887e-05	0	LAMC1_ITGA6_ITGB1	LAMC1 - (ITGA6+ITGB1)	LAMININ	ECM-Receptor	KEGG: hsa04512
Mural cells	Endothelial cells (baboon)	LAMC1	ITGA6_ITGB1	6.13804e-06	0.01	LAMC1_ITGA6_ITGB1	LAMC1 - (ITGA6+ITGB1)	LAMININ	ECM-Receptor	KEGG: hsa04512
Neuronal cells	Endothelial cells (baboon)	LAMC1	ITGA6_ITGB1	6.13804e-06	0.01	LAMC1_ITGA6_ITGB1	LAMC1 - (ITGA6+ITGB1)	LAMININ	ECM-Receptor	KEGG: hsa04512
Vascular EC	Endothelial cells (baboon)	LAMC1	ITGA6_ITGB1	6.13804e-06	0.01	LAMC1_ITGA6_ITGB1	LAMC1 - (ITGA6+ITGB1)	LAMININ	ECM-Receptor	KEGG: hsa04512
CM	Vascular EC	LAMC1	ITGA6_ITGB1	4.34009e-05	0	LAMC1_ITGA6_ITGB1	LAMC1 - (ITGA6+ITGB1)	LAMININ	ECM-Receptor	KEGG: hsa04512
Endocardial/lymphatic EC	Vascular EC	LAMC1	ITGA6_ITGB1	4.34009e-05	0	LAMC1_ITGA6_ITGB1	LAMC1 - (ITGA6+ITGB1)	LAMININ	ECM-Receptor	KEGG: hsa04512
Endothelial cells (baboon)	Vascular EC	LAMC1	ITGA6_ITGB1	4.34026e-06	0	LAMC1_ITGA6_ITGB1	LAMC1 - (ITGA6+ITGB1)	LAMININ	ECM-Receptor	KEGG: hsa04512
Fibroblasts	Vascular EC	LAMC1	ITGA6_ITGB1	0.000112834	0	LAMC1_ITGA6_ITGB1	LAMC1 - (ITGA6+ITGB1)	LAMININ	ECM-Receptor	KEGG: hsa04512
Mural cells	Vascular EC	LAMC1	ITGA6_ITGB1	8.68048e-06	0	LAMC1_ITGA6_ITGB1	LAMC1 - (ITGA6+ITGB1)	LAMININ	ECM-Receptor	KEGG: hsa04512
Neuronal cells	Vascular EC	LAMC1	ITGA6_ITGB1	8.68048e-06	0	LAMC1_ITGA6_ITGB1	LAMC1 - (ITGA6+ITGB1)	LAMININ	ECM-Receptor	KEGG: hsa04512
Vascular EC	Vascular EC	LAMC1	ITGA6_ITGB1	8.68048e-06	0	LAMC1_ITGA6_ITGB1	LAMC1 - (ITGA6+ITGB1)	LAMININ	ECM-Receptor	KEGG: hsa04512
Endocardial/lymphatic EC	Endocardial/lymphatic EC	TNXB	ITGA9_ITGB1	2.6041e-05	0	TNXB_ITGA9_ITGB1	TNXB - (ITGA9+ITGB1)	TENASCIN	ECM-Receptor	KEGG: hsa04512
Fibroblasts	Endocardial/lymphatic EC	TNXB	ITGA9_ITGB1	2.6041e-05	0	TNXB_ITGA9_ITGB1	TNXB - (ITGA9+ITGB1)	TENASCIN	ECM-Receptor	KEGG: hsa04512
Endocardial/lymphatic EC	Endothelial cells (baboon)	TNXB	ITGA9_ITGB1	1.06314e-05	0	TNXB_ITGA9_ITGB1	TNXB - (ITGA9+ITGB1)	TENASCIN	ECM-Receptor	KEGG: hsa04512
Fibroblasts	Endothelial cells (baboon)	TNXB	ITGA9_ITGB1	1.06314e-05	0	TNXB_ITGA9_ITGB1	TNXB - (ITGA9+ITGB1)	TENASCIN	ECM-Receptor	KEGG: hsa04512
Endocardial/lymphatic EC	Vascular EC	TNXB	ITGA9_ITGB1	8.68048e-06	0	TNXB_ITGA9_ITGB1	TNXB - (ITGA9+ITGB1)	TENASCIN	ECM-Receptor	KEGG: hsa04512
Fibroblasts	Vascular EC	TNXB	ITGA9_ITGB1	8.68048e-06	0	TNXB_ITGA9_ITGB1	TNXB - (ITGA9+ITGB1)	TENASCIN	ECM-Receptor	KEGG: hsa04512
Fibroblasts	Endocardial/lymphatic EC	COL1A1	ITGA9_ITGB1	2.6041e-05	0	COL1A1_ITGA9_ITGB1	COL1A1 - (ITGA9+ITGB1)	COLLAGEN	ECM-Receptor	KEGG: hsa04512
Fibroblasts	Endothelial cells (baboon)	COL1A1	ITGA9_ITGB1	1.06314e-05	0	COL1A1_ITGA9_ITGB1	COL1A1 - (ITGA9+ITGB1)	COLLAGEN	ECM-Receptor	KEGG: hsa04512
Fibroblasts	Vascular EC	COL1A1	ITGA9_ITGB1	8.68048e-06	0	COL1A1_ITGA9_ITGB1	COL1A1 - (ITGA9+ITGB1)	COLLAGEN	ECM-Receptor	KEGG: hsa04512
Fibroblasts	Endocardial/lymphatic EC	COL1A2	ITGA9_ITGB1	0.000104156	0	COL1A2_ITGA9_ITGB1	COL1A2 - (ITGA9+ITGB1)	COLLAGEN	ECM-Receptor	KEGG: hsa04512
Fibroblasts	Endothelial cells (baboon)	COL1A2	ITGA9_ITGB1	4.25241e-05	0	COL1A2_ITGA9_ITGB1	COL1A2 - (ITGA9+ITGB1)	COLLAGEN	ECM-Receptor	KEGG: hsa04512
Fibroblasts	Vascular EC	COL1A2	ITGA9_ITGB1	3.4721e-05	0	COL1A2_ITGA9_ITGB1	COL1A2 - (ITGA9+ITGB1)	COLLAGEN	ECM-Receptor	KEGG: hsa04512
Endothelial cells (baboon)	Endocardial/lymphatic EC	COL4A1	ITGA9_ITGB1	5.20806e-05	0	COL4A1_ITGA9_ITGB1	COL4A1 - (ITGA9+ITGB1)	COLLAGEN	ECM-Receptor	KEGG: hsa04512
Endothelial cells (baboon)	Endothelial cells (baboon)	COL4A1	ITGA9_ITGB1	2.12625e-05	0	COL4A1_ITGA9_ITGB1	COL4A1 - (ITGA9+ITGB1)	COLLAGEN	ECM-Receptor	KEGG: hsa04512
Endothelial cells (baboon)	Vascular EC	COL4A1	ITGA9_ITGB1	1.73608e-05	0	COL4A1_ITGA9_ITGB1	COL4A1 - (ITGA9+ITGB1)	COLLAGEN	ECM-Receptor	KEGG: hsa04512
CM	Endocardial/lymphatic EC	COL4A2	ITGA9_ITGB1	0.000104156	0	COL4A2_ITGA9_ITGB1	COL4A2 - (ITGA9+ITGB1)	COLLAGEN	ECM-Receptor	KEGG: hsa04512
Endocardial/lymphatic EC	Endocardial/lymphatic EC	COL4A2	ITGA9_ITGB1	0.000104156	0	COL4A2_ITGA9_ITGB1	COL4A2 - (ITGA9+ITGB1)	COLLAGEN	ECM-Receptor	KEGG: hsa04512
Endothelial cells (baboon)	Endocardial/lymphatic EC	COL4A2	ITGA9_ITGB1	9.11375e-05	0	COL4A2_ITGA9_ITGB1	COL4A2 - (ITGA9+ITGB1)	COLLAGEN	ECM-Receptor	KEGG: hsa04512
Fibroblasts	Endocardial/lymphatic EC	COL4A2	ITGA9_ITGB1	0.000104156	0	COL4A2_ITGA9_ITGB1	COL4A2 - (ITGA9+ITGB1)	COLLAGEN	ECM-Receptor	KEGG: hsa04512
Mural cells	Endocardial/lymphatic EC	COL4A2	ITGA9_ITGB1	0.000130191	0	COL4A2_ITGA9_ITGB1	COL4A2 - (ITGA9+ITGB1)	COLLAGEN	ECM-Receptor	KEGG: hsa04512
Vascular EC	Endocardial/lymphatic EC	COL4A2	ITGA9_ITGB1	0.000104156	0	COL4A2_ITGA9_ITGB1	COL4A2 - (ITGA9+ITGB1)	COLLAGEN	ECM-Receptor	KEGG: hsa04512
CM	Vascular EC	COL4A2	ITGA9_ITGB1	3.4721e-05	0	COL4A2_ITGA9_ITGB1	COL4A2 - (ITGA9+ITGB1)	COLLAGEN	ECM-Receptor	KEGG: hsa04512
Endocardial/lymphatic EC	Vascular EC	COL4A2	ITGA9_ITGB1	3.4721e-05	0	COL4A2_ITGA9_ITGB1	COL4A2 - (ITGA9+ITGB1)	COLLAGEN	ECM-Receptor	KEGG: hsa04512
Endothelial cells (baboon)	Vascular EC	COL4A2	ITGA9_ITGB1	3.0381e-05	0.03	COL4A2_ITGA9_ITGB1	COL4A2 - (ITGA9+ITGB1)	COLLAGEN	ECM-Receptor	KEGG: hsa04512
Fibroblasts	Vascular EC	COL4A2	ITGA9_ITGB1	3.4721e-05	0	COL4A2_ITGA9_ITGB1	COL4A2 - (ITGA9+ITGB1)	COLLAGEN	ECM-Receptor	KEGG: hsa04512
Mural cells	Vascular EC	COL4A2	ITGA9_ITGB1	4.34009e-05	0	COL4A2_ITGA9_ITGB1	COL4A2 - (ITGA9+ITGB1)	COLLAGEN	ECM-Receptor	KEGG: hsa04512
Vascular EC	Vascular EC	COL4A2	ITGA9_ITGB1	3.4721e-05	0	COL4A2_ITGA9_ITGB1	COL4A2 - (ITGA9+ITGB1)	COLLAGEN	ECM-Receptor	KEGG: hsa04512
Fibroblasts	Endocardial/lymphatic EC	COL6A1	ITGA9_ITGB1	2.6041e-05	0	COL6A1_ITGA9_ITGB1	COL6A1 - (ITGA9+ITGB1)	COLLAGEN	ECM-Receptor	KEGG: hsa04512
Fibroblasts	Endothelial cells (baboon)	COL6A1	ITGA9_ITGB1	1.06314e-05	0	COL6A1_ITGA9_ITGB1	COL6A1 - (ITGA9+ITGB1)	COLLAGEN	ECM-Receptor	KEGG: hsa04512
Fibroblasts	Vascular EC	COL6A1	ITGA9_ITGB1	8.68048e-06	0	COL6A1_ITGA9_ITGB1	COL6A1 - (ITGA9+ITGB1)	COLLAGEN	ECM-Receptor	KEGG: hsa04512
Fibroblasts	Endocardial/lymphatic EC	COL6A2	ITGA9_ITGB1	2.6041e-05	0	COL6A2_ITGA9_ITGB1	COL6A2 - (ITGA9+ITGB1)	COLLAGEN	ECM-Receptor	KEGG: hsa04512
Fibroblasts	Endothelial cells (baboon)	COL6A2	ITGA9_ITGB1	1.06314e-05	0	COL6A2_ITGA9_ITGB1	COL6A2 - (ITGA9+ITGB1)	COLLAGEN	ECM-Receptor	KEGG: hsa04512
Fibroblasts	Vascular EC	COL6A2	ITGA9_ITGB1	8.68048e-06	0	COL6A2_ITGA9_ITGB1	COL6A2 - (ITGA9+ITGB1)	COLLAGEN	ECM-Receptor	KEGG: hsa04512
Fibroblasts	Endocardial/lymphatic EC	COL6A3	ITGA9_ITGB1	0.000104156	0	COL6A3_ITGA9_ITGB1	COL6A3 - (ITGA9+ITGB1)	COLLAGEN	ECM-Receptor	KEGG: hsa04512
Fibroblasts	Endothelial cells (baboon)	COL6A3	ITGA9_ITGB1	4.25241e-05	0	COL6A3_ITGA9_ITGB1	COL6A3 - (ITGA9+ITGB1)	COLLAGEN	ECM-Receptor	KEGG: hsa04512
Fibroblasts	Vascular EC	COL6A3	ITGA9_ITGB1	3.4721e-05	0	COL6A3_ITGA9_ITGB1	COL6A3 - (ITGA9+ITGB1)	COLLAGEN	ECM-Receptor	KEGG: hsa04512
Fibroblasts	Endocardial/lymphatic EC	COL6A6	ITGA9_ITGB1	2.6041e-05	0	COL6A6_ITGA9_ITGB1	COL6A6 - (ITGA9+ITGB1)	COLLAGEN	ECM-Receptor	KEGG: hsa04512
Fibroblasts	Endothelial cells (baboon)	COL6A6	ITGA9_ITGB1	1.06314e-05	0	COL6A6_ITGA9_ITGB1	COL6A6 - (ITGA9+ITGB1)	COLLAGEN	ECM-Receptor	KEGG: hsa04512
Fibroblasts	Vascular EC	COL6A6	ITGA9_ITGB1	8.68048e-06	0	COL6A6_ITGA9_ITGB1	COL6A6 - (ITGA9+ITGB1)	COLLAGEN	ECM-Receptor	KEGG: hsa04512
CM	Endocardial/lymphatic EC	LAMA4	ITGA9_ITGB1	0.000104156	0	LAMA4_ITGA9_ITGB1	LAMA4 - (ITGA9+ITGB1)	LAMININ	ECM-Receptor	KEGG: hsa04512
Endocardial/lymphatic EC	Endocardial/lymphatic EC	LAMA4	ITGA9_ITGB1	0.00023432	0	LAMA4_ITGA9_ITGB1	LAMA4 - (ITGA9+ITGB1)	LAMININ	ECM-Receptor	KEGG: hsa04512
Fibroblasts	Endocardial/lymphatic EC	LAMA4	ITGA9_ITGB1	0.000130191	0	LAMA4_ITGA9_ITGB1	LAMA4 - (ITGA9+ITGB1)	LAMININ	ECM-Receptor	KEGG: hsa04512
Endocardial/lymphatic EC	Endothelial cells (baboon)	LAMA4	ITGA9_ITGB1	9.5674e-05	0.01	LAMA4_ITGA9_ITGB1	LAMA4 - (ITGA9+ITGB1)	LAMININ	ECM-Receptor	KEGG: hsa04512
Fibroblasts	Endothelial cells (baboon)	LAMA4	ITGA9_ITGB1	5.31545e-05	0.04	LAMA4_ITGA9_ITGB1	LAMA4 - (ITGA9+ITGB1)	LAMININ	ECM-Receptor	KEGG: hsa04512
CM	Vascular EC	LAMA4	ITGA9_ITGB1	3.4721e-05	0	LAMA4_ITGA9_ITGB1	LAMA4 - (ITGA9+ITGB1)	LAMININ	ECM-Receptor	KEGG: hsa04512
Endocardial/lymphatic EC	Vascular EC	LAMA4	ITGA9_ITGB1	7.81189e-05	0	LAMA4_ITGA9_ITGB1	LAMA4 - (ITGA9+ITGB1)	LAMININ	ECM-Receptor	KEGG: hsa04512
Fibroblasts	Vascular EC	LAMA4	ITGA9_ITGB1	4.34009e-05	0	LAMA4_ITGA9_ITGB1	LAMA4 - (ITGA9+ITGB1)	LAMININ	ECM-Receptor	KEGG: hsa04512
Endocardial/lymphatic EC	Endocardial/lymphatic EC	LAMB1	ITGA9_ITGB1	2.6041e-05	0	LAMB1_ITGA9_ITGB1	LAMB1 - (ITGA9+ITGB1)	LAMININ	ECM-Receptor	KEGG: hsa04512
Fibroblasts	Endocardial/lymphatic EC	LAMB1	ITGA9_ITGB1	2.6041e-05	0	LAMB1_ITGA9_ITGB1	LAMB1 - (ITGA9+ITGB1)	LAMININ	ECM-Receptor	KEGG: hsa04512
Neuronal cells	Endocardial/lymphatic EC	LAMB1	ITGA9_ITGB1	2.6041e-05	0	LAMB1_ITGA9_ITGB1	LAMB1 - (ITGA9+ITGB1)	LAMININ	ECM-Receptor	KEGG: hsa04512
Vascular EC	Endocardial/lymphatic EC	LAMB1	ITGA9_ITGB1	2.6041e-05	0	LAMB1_ITGA9_ITGB1	LAMB1 - (ITGA9+ITGB1)	LAMININ	ECM-Receptor	KEGG: hsa04512
Endocardial/lymphatic EC	Endothelial cells (baboon)	LAMB1	ITGA9_ITGB1	1.06314e-05	0	LAMB1_ITGA9_ITGB1	LAMB1 - (ITGA9+ITGB1)	LAMININ	ECM-Receptor	KEGG: hsa04512
Fibroblasts	Endothelial cells (baboon)	LAMB1	ITGA9_ITGB1	1.06314e-05	0	LAMB1_ITGA9_ITGB1	LAMB1 - (ITGA9+ITGB1)	LAMININ	ECM-Receptor	KEGG: hsa04512
Neuronal cells	Endothelial cells (baboon)	LAMB1	ITGA9_ITGB1	1.06314e-05	0	LAMB1_ITGA9_ITGB1	LAMB1 - (ITGA9+ITGB1)	LAMININ	ECM-Receptor	KEGG: hsa04512
Vascular EC	Endothelial cells (baboon)	LAMB1	ITGA9_ITGB1	1.06314e-05	0	LAMB1_ITGA9_ITGB1	LAMB1 - (ITGA9+ITGB1)	LAMININ	ECM-Receptor	KEGG: hsa04512
Endocardial/lymphatic EC	Vascular EC	LAMB1	ITGA9_ITGB1	8.68048e-06	0	LAMB1_ITGA9_ITGB1	LAMB1 - (ITGA9+ITGB1)	LAMININ	ECM-Receptor	KEGG: hsa04512
Fibroblasts	Vascular EC	LAMB1	ITGA9_ITGB1	8.68048e-06	0	LAMB1_ITGA9_ITGB1	LAMB1 - (ITGA9+ITGB1)	LAMININ	ECM-Receptor	KEGG: hsa04512
Neuronal cells	Vascular EC	LAMB1	ITGA9_ITGB1	8.68048e-06	0	LAMB1_ITGA9_ITGB1	LAMB1 - (ITGA9+ITGB1)	LAMININ	ECM-Receptor	KEGG: hsa04512
Vascular EC	Vascular EC	LAMB1	ITGA9_ITGB1	8.68048e-06	0	LAMB1_ITGA9_ITGB1	LAMB1 - (ITGA9+ITGB1)	LAMININ	ECM-Receptor	KEGG: hsa04512
CM	Endocardial/lymphatic EC	LAMC1	ITGA9_ITGB1	0.000130191	0	LAMC1_ITGA9_ITGB1	LAMC1 - (ITGA9+ITGB1)	LAMININ	ECM-Receptor	KEGG: hsa04512
Endocardial/lymphatic EC	Endocardial/lymphatic EC	LAMC1	ITGA9_ITGB1	0.000130191	0	LAMC1_ITGA9_ITGB1	LAMC1 - (ITGA9+ITGB1)	LAMININ	ECM-Receptor	KEGG: hsa04512
Fibroblasts	Endocardial/lymphatic EC	LAMC1	ITGA9_ITGB1	0.000338427	0	LAMC1_ITGA9_ITGB1	LAMC1 - (ITGA9+ITGB1)	LAMININ	ECM-Receptor	KEGG: hsa04512
Fibroblasts	Endothelial cells (baboon)	LAMC1	ITGA9_ITGB1	0.00013819	0.01	LAMC1_ITGA9_ITGB1	LAMC1 - (ITGA9+ITGB1)	LAMININ	ECM-Receptor	KEGG: hsa04512
CM	Vascular EC	LAMC1	ITGA9_ITGB1	4.34009e-05	0	LAMC1_ITGA9_ITGB1	LAMC1 - (ITGA9+ITGB1)	LAMININ	ECM-Receptor	KEGG: hsa04512
Endocardial/lymphatic EC	Vascular EC	LAMC1	ITGA9_ITGB1	4.34009e-05	0	LAMC1_ITGA9_ITGB1	LAMC1 - (ITGA9+ITGB1)	LAMININ	ECM-Receptor	KEGG: hsa04512
Fibroblasts	Vascular EC	LAMC1	ITGA9_ITGB1	0.000112834	0	LAMC1_ITGA9_ITGB1	LAMC1 - (ITGA9+ITGB1)	LAMININ	ECM-Receptor	KEGG: hsa04512
Fibroblasts	CM	FN1	ITGAV_ITGB1	1.73608e-05	0	FN1_ITGAV_ITGB1	FN1 - (ITGAV+ITGB1)	FN1	ECM-Receptor	KEGG: hsa04512
Endocardial/lymphatic EC	CM	TNXB	ITGAV_ITGB6	1.73608e-05	0	TNXB_ITGAV_ITGB6	TNXB - (ITGAV+ITGB6)	TENASCIN	ECM-Receptor	KEGG: hsa04512
Fibroblasts	CM	TNXB	ITGAV_ITGB6	1.73608e-05	0	TNXB_ITGAV_ITGB6	TNXB - (ITGAV+ITGB6)	TENASCIN	ECM-Receptor	KEGG: hsa04512
Fibroblasts	CM	FN1	ITGAV_ITGB6	1.73608e-05	0	FN1_ITGAV_ITGB6	FN1 - (ITGAV+ITGB6)	FN1	ECM-Receptor	KEGG: hsa04512
Fibroblasts	CM	FN1	ITGAV_ITGB8	1.73608e-05	0	FN1_ITGAV_ITGB8	FN1 - (ITGAV+ITGB8)	FN1	ECM-Receptor	KEGG: hsa04512
CM	CM	LAMA4	ITGAV_ITGB8	6.94396e-05	0	LAMA4_ITGAV_ITGB8	LAMA4 - (ITGAV+ITGB8)	LAMININ	ECM-Receptor	KEGG: hsa04512
Endocardial/lymphatic EC	CM	LAMA4	ITGAV_ITGB8	0.000156226	0	LAMA4_ITGAV_ITGB8	LAMA4 - (ITGAV+ITGB8)	LAMININ	ECM-Receptor	KEGG: hsa04512
Fibroblasts	CM	LAMA4	ITGAV_ITGB8	8.6798e-05	0	LAMA4_ITGAV_ITGB8	LAMA4 - (ITGAV+ITGB8)	LAMININ	ECM-Receptor	KEGG: hsa04512
Mural cells	CM	LAMA4	ITGAV_ITGB8	1.73608e-05	0	LAMA4_ITGAV_ITGB8	LAMA4 - (ITGAV+ITGB8)	LAMININ	ECM-Receptor	KEGG: hsa04512
Neuronal cells	CM	LAMA4	ITGAV_ITGB8	1.73608e-05	0	LAMA4_ITGAV_ITGB8	LAMA4 - (ITGAV+ITGB8)	LAMININ	ECM-Receptor	KEGG: hsa04512
Vascular EC	CM	LAMA4	ITGAV_ITGB8	1.73608e-05	0	LAMA4_ITGAV_ITGB8	LAMA4 - (ITGAV+ITGB8)	LAMININ	ECM-Receptor	KEGG: hsa04512
Endocardial/lymphatic EC	CM	LAMB1	ITGAV_ITGB8	1.73608e-05	0	LAMB1_ITGAV_ITGB8	LAMB1 - (ITGAV+ITGB8)	LAMININ	ECM-Receptor	KEGG: hsa04512
Fibroblasts	CM	LAMB1	ITGAV_ITGB8	1.73608e-05	0	LAMB1_ITGAV_ITGB8	LAMB1 - (ITGAV+ITGB8)	LAMININ	ECM-Receptor	KEGG: hsa04512
Neuronal cells	CM	LAMB1	ITGAV_ITGB8	1.73608e-05	0	LAMB1_ITGAV_ITGB8	LAMB1 - (ITGAV+ITGB8)	LAMININ	ECM-Receptor	KEGG: hsa04512
Vascular EC	CM	LAMB1	ITGAV_ITGB8	1.73608e-05	0	LAMB1_ITGAV_ITGB8	LAMB1 - (ITGAV+ITGB8)	LAMININ	ECM-Receptor	KEGG: hsa04512
CM	CM	LAMC1	ITGAV_ITGB8	8.6798e-05	0	LAMC1_ITGAV_ITGB8	LAMC1 - (ITGAV+ITGB8)	LAMININ	ECM-Receptor	KEGG: hsa04512
Endocardial/lymphatic EC	CM	LAMC1	ITGAV_ITGB8	8.6798e-05	0	LAMC1_ITGAV_ITGB8	LAMC1 - (ITGAV+ITGB8)	LAMININ	ECM-Receptor	KEGG: hsa04512
Endothelial cells (baboon)	CM	LAMC1	ITGAV_ITGB8	8.68048e-06	0	LAMC1_ITGAV_ITGB8	LAMC1 - (ITGAV+ITGB8)	LAMININ	ECM-Receptor	KEGG: hsa04512
Fibroblasts	CM	LAMC1	ITGAV_ITGB8	0.000225644	0	LAMC1_ITGAV_ITGB8	LAMC1 - (ITGAV+ITGB8)	LAMININ	ECM-Receptor	KEGG: hsa04512
Mural cells	CM	LAMC1	ITGAV_ITGB8	1.73608e-05	0	LAMC1_ITGAV_ITGB8	LAMC1 - (ITGAV+ITGB8)	LAMININ	ECM-Receptor	KEGG: hsa04512
Neuronal cells	CM	LAMC1	ITGAV_ITGB8	1.73608e-05	0	LAMC1_ITGAV_ITGB8	LAMC1 - (ITGAV+ITGB8)	LAMININ	ECM-Receptor	KEGG: hsa04512
Vascular EC	CM	LAMC1	ITGAV_ITGB8	1.73608e-05	0	LAMC1_ITGAV_ITGB8	LAMC1 - (ITGAV+ITGB8)	LAMININ	ECM-Receptor	KEGG: hsa04512
Fibroblasts	CM	COL1A1	ITGAV_ITGB8	1.73608e-05	0	COL1A1_ITGAV_ITGB8	COL1A1 - (ITGAV+ITGB8)	COLLAGEN	ECM-Receptor	KEGG: hsa04512
Fibroblasts	CM	COL1A2	ITGAV_ITGB8	6.94396e-05	0	COL1A2_ITGAV_ITGB8	COL1A2 - (ITGAV+ITGB8)	COLLAGEN	ECM-Receptor	KEGG: hsa04512
Endothelial cells (baboon)	CM	COL4A1	ITGAV_ITGB8	3.4721e-05	0	COL4A1_ITGAV_ITGB8	COL4A1 - (ITGAV+ITGB8)	COLLAGEN	ECM-Receptor	KEGG: hsa04512
CM	CM	COL4A2	ITGAV_ITGB8	6.94396e-05	0	COL4A2_ITGAV_ITGB8	COL4A2 - (ITGAV+ITGB8)	COLLAGEN	ECM-Receptor	KEGG: hsa04512
Endocardial/lymphatic EC	CM	COL4A2	ITGAV_ITGB8	6.94396e-05	0	COL4A2_ITGAV_ITGB8	COL4A2 - (ITGAV+ITGB8)	COLLAGEN	ECM-Receptor	KEGG: hsa04512
Endothelial cells (baboon)	CM	COL4A2	ITGAV_ITGB8	6.07602e-05	0	COL4A2_ITGAV_ITGB8	COL4A2 - (ITGAV+ITGB8)	COLLAGEN	ECM-Receptor	KEGG: hsa04512
Fibroblasts	CM	COL4A2	ITGAV_ITGB8	6.94396e-05	0	COL4A2_ITGAV_ITGB8	COL4A2 - (ITGAV+ITGB8)	COLLAGEN	ECM-Receptor	KEGG: hsa04512
Mural cells	CM	COL4A2	ITGAV_ITGB8	8.6798e-05	0	COL4A2_ITGAV_ITGB8	COL4A2 - (ITGAV+ITGB8)	COLLAGEN	ECM-Receptor	KEGG: hsa04512
Neuronal cells	CM	COL4A2	ITGAV_ITGB8	1.73608e-05	0	COL4A2_ITGAV_ITGB8	COL4A2 - (ITGAV+ITGB8)	COLLAGEN	ECM-Receptor	KEGG: hsa04512
Vascular EC	CM	COL4A2	ITGAV_ITGB8	6.94396e-05	0	COL4A2_ITGAV_ITGB8	COL4A2 - (ITGAV+ITGB8)	COLLAGEN	ECM-Receptor	KEGG: hsa04512
Fibroblasts	CM	COL6A1	ITGAV_ITGB8	1.73608e-05	0	COL6A1_ITGAV_ITGB8	COL6A1 - (ITGAV+ITGB8)	COLLAGEN	ECM-Receptor	KEGG: hsa04512
Fibroblasts	CM	COL6A2	ITGAV_ITGB8	1.73608e-05	0	COL6A2_ITGAV_ITGB8	COL6A2 - (ITGAV+ITGB8)	COLLAGEN	ECM-Receptor	KEGG: hsa04512
Fibroblasts	CM	COL6A3	ITGAV_ITGB8	6.94396e-05	0	COL6A3_ITGAV_ITGB8	COL6A3 - (ITGAV+ITGB8)	COLLAGEN	ECM-Receptor	KEGG: hsa04512
Fibroblasts	CM	COL6A6	ITGAV_ITGB8	1.73608e-05	0	COL6A6_ITGAV_ITGB8	COL6A6 - (ITGAV+ITGB8)	COLLAGEN	ECM-Receptor	KEGG: hsa04512
Fibroblasts	Lymphoids (baboon)	FN1	CD44	8.68048e-06	0	FN1_CD44	FN1 - CD44	FN1	ECM-Receptor	KEGG: hsa04512
Fibroblasts	Mast cells (baboon)	FN1	CD44	2.17013e-06	0	FN1_CD44	FN1 - CD44	FN1	ECM-Receptor	KEGG: hsa04512
Fibroblasts	Myeloids (baboon)	FN1	CD44	8.68048e-06	0	FN1_CD44	FN1 - CD44	FN1	ECM-Receptor	KEGG: hsa04512
Fibroblasts	Lymphoids (baboon)	COL1A1	CD44	8.68048e-06	0	COL1A1_CD44	COL1A1 - CD44	COLLAGEN	ECM-Receptor	KEGG: hsa04512
Fibroblasts	Mast cells (baboon)	COL1A1	CD44	2.17013e-06	0	COL1A1_CD44	COL1A1 - CD44	COLLAGEN	ECM-Receptor	KEGG: hsa04512
Fibroblasts	Myeloids (baboon)	COL1A1	CD44	8.68048e-06	0	COL1A1_CD44	COL1A1 - CD44	COLLAGEN	ECM-Receptor	KEGG: hsa04512
Fibroblasts	Lymphoids (baboon)	COL1A2	CD44	3.4721e-05	0	COL1A2_CD44	COL1A2 - CD44	COLLAGEN	ECM-Receptor	KEGG: hsa04512
Fibroblasts	Mast cells (baboon)	COL1A2	CD44	8.68048e-06	0	COL1A2_CD44	COL1A2 - CD44	COLLAGEN	ECM-Receptor	KEGG: hsa04512
Fibroblasts	Myeloids (baboon)	COL1A2	CD44	3.4721e-05	0	COL1A2_CD44	COL1A2 - CD44	COLLAGEN	ECM-Receptor	KEGG: hsa04512
Endothelial cells (baboon)	Lymphoids (baboon)	COL4A1	CD44	1.73608e-05	0	COL4A1_CD44	COL4A1 - CD44	COLLAGEN	ECM-Receptor	KEGG: hsa04512
Endothelial cells (baboon)	Mast cells (baboon)	COL4A1	CD44	4.34026e-06	0	COL4A1_CD44	COL4A1 - CD44	COLLAGEN	ECM-Receptor	KEGG: hsa04512
Endothelial cells (baboon)	Myeloids (baboon)	COL4A1	CD44	1.73608e-05	0	COL4A1_CD44	COL4A1 - CD44	COLLAGEN	ECM-Receptor	KEGG: hsa04512
CM	Lymphoids (baboon)	COL4A2	CD44	3.4721e-05	0	COL4A2_CD44	COL4A2 - CD44	COLLAGEN	ECM-Receptor	KEGG: hsa04512
Endocardial/lymphatic EC	Lymphoids (baboon)	COL4A2	CD44	3.4721e-05	0	COL4A2_CD44	COL4A2 - CD44	COLLAGEN	ECM-Receptor	KEGG: hsa04512
Endothelial cells (baboon)	Lymphoids (baboon)	COL4A2	CD44	3.0381e-05	0	COL4A2_CD44	COL4A2 - CD44	COLLAGEN	ECM-Receptor	KEGG: hsa04512
Fibroblasts	Lymphoids (baboon)	COL4A2	CD44	3.4721e-05	0	COL4A2_CD44	COL4A2 - CD44	COLLAGEN	ECM-Receptor	KEGG: hsa04512
Mural cells	Lymphoids (baboon)	COL4A2	CD44	4.34009e-05	0	COL4A2_CD44	COL4A2 - CD44	COLLAGEN	ECM-Receptor	KEGG: hsa04512
Neuronal cells	Lymphoids (baboon)	COL4A2	CD44	8.68048e-06	0	COL4A2_CD44	COL4A2 - CD44	COLLAGEN	ECM-Receptor	KEGG: hsa04512
Vascular EC	Lymphoids (baboon)	COL4A2	CD44	3.4721e-05	0	COL4A2_CD44	COL4A2 - CD44	COLLAGEN	ECM-Receptor	KEGG: hsa04512
CM	Myeloids (baboon)	COL4A2	CD44	3.4721e-05	0	COL4A2_CD44	COL4A2 - CD44	COLLAGEN	ECM-Receptor	KEGG: hsa04512
Endocardial/lymphatic EC	Myeloids (baboon)	COL4A2	CD44	3.4721e-05	0	COL4A2_CD44	COL4A2 - CD44	COLLAGEN	ECM-Receptor	KEGG: hsa04512
Endothelial cells (baboon)	Myeloids (baboon)	COL4A2	CD44	3.0381e-05	0	COL4A2_CD44	COL4A2 - CD44	COLLAGEN	ECM-Receptor	KEGG: hsa04512
Fibroblasts	Myeloids (baboon)	COL4A2	CD44	3.4721e-05	0	COL4A2_CD44	COL4A2 - CD44	COLLAGEN	ECM-Receptor	KEGG: hsa04512
Mural cells	Myeloids (baboon)	COL4A2	CD44	4.34009e-05	0	COL4A2_CD44	COL4A2 - CD44	COLLAGEN	ECM-Receptor	KEGG: hsa04512
Neuronal cells	Myeloids (baboon)	COL4A2	CD44	8.68048e-06	0	COL4A2_CD44	COL4A2 - CD44	COLLAGEN	ECM-Receptor	KEGG: hsa04512
Vascular EC	Myeloids (baboon)	COL4A2	CD44	3.4721e-05	0	COL4A2_CD44	COL4A2 - CD44	COLLAGEN	ECM-Receptor	KEGG: hsa04512
Fibroblasts	Lymphoids (baboon)	COL6A1	CD44	8.68048e-06	0	COL6A1_CD44	COL6A1 - CD44	COLLAGEN	ECM-Receptor	KEGG: hsa04512
Fibroblasts	Mast cells (baboon)	COL6A1	CD44	2.17013e-06	0	COL6A1_CD44	COL6A1 - CD44	COLLAGEN	ECM-Receptor	KEGG: hsa04512
Fibroblasts	Myeloids (baboon)	COL6A1	CD44	8.68048e-06	0	COL6A1_CD44	COL6A1 - CD44	COLLAGEN	ECM-Receptor	KEGG: hsa04512
Fibroblasts	Lymphoids (baboon)	COL6A2	CD44	8.68048e-06	0	COL6A2_CD44	COL6A2 - CD44	COLLAGEN	ECM-Receptor	KEGG: hsa04512
Fibroblasts	Mast cells (baboon)	COL6A2	CD44	2.17013e-06	0	COL6A2_CD44	COL6A2 - CD44	COLLAGEN	ECM-Receptor	KEGG: hsa04512
Fibroblasts	Myeloids (baboon)	COL6A2	CD44	8.68048e-06	0	COL6A2_CD44	COL6A2 - CD44	COLLAGEN	ECM-Receptor	KEGG: hsa04512
Fibroblasts	Lymphoids (baboon)	COL6A3	CD44	3.4721e-05	0	COL6A3_CD44	COL6A3 - CD44	COLLAGEN	ECM-Receptor	KEGG: hsa04512
Fibroblasts	Mast cells (baboon)	COL6A3	CD44	8.68048e-06	0	COL6A3_CD44	COL6A3 - CD44	COLLAGEN	ECM-Receptor	KEGG: hsa04512
Fibroblasts	Myeloids (baboon)	COL6A3	CD44	3.4721e-05	0	COL6A3_CD44	COL6A3 - CD44	COLLAGEN	ECM-Receptor	KEGG: hsa04512
Fibroblasts	Lymphoids (baboon)	COL6A6	CD44	8.68048e-06	0	COL6A6_CD44	COL6A6 - CD44	COLLAGEN	ECM-Receptor	KEGG: hsa04512
Fibroblasts	Mast cells (baboon)	COL6A6	CD44	2.17013e-06	0	COL6A6_CD44	COL6A6 - CD44	COLLAGEN	ECM-Receptor	KEGG: hsa04512
Fibroblasts	Myeloids (baboon)	COL6A6	CD44	8.68048e-06	0	COL6A6_CD44	COL6A6 - CD44	COLLAGEN	ECM-Receptor	KEGG: hsa04512
CM	Lymphoids (baboon)	LAMA4	CD44	3.4721e-05	0	LAMA4_CD44	LAMA4 - CD44	LAMININ	ECM-Receptor	KEGG: hsa04512
Endocardial/lymphatic EC	Lymphoids (baboon)	LAMA4	CD44	7.81189e-05	0	LAMA4_CD44	LAMA4 - CD44	LAMININ	ECM-Receptor	KEGG: hsa04512
Fibroblasts	Lymphoids (baboon)	LAMA4	CD44	4.34009e-05	0	LAMA4_CD44	LAMA4 - CD44	LAMININ	ECM-Receptor	KEGG: hsa04512
Mural cells	Lymphoids (baboon)	LAMA4	CD44	8.68048e-06	0	LAMA4_CD44	LAMA4 - CD44	LAMININ	ECM-Receptor	KEGG: hsa04512
Neuronal cells	Lymphoids (baboon)	LAMA4	CD44	8.68048e-06	0	LAMA4_CD44	LAMA4 - CD44	LAMININ	ECM-Receptor	KEGG: hsa04512
Vascular EC	Lymphoids (baboon)	LAMA4	CD44	8.68048e-06	0	LAMA4_CD44	LAMA4 - CD44	LAMININ	ECM-Receptor	KEGG: hsa04512
CM	Myeloids (baboon)	LAMA4	CD44	3.4721e-05	0	LAMA4_CD44	LAMA4 - CD44	LAMININ	ECM-Receptor	KEGG: hsa04512
Endocardial/lymphatic EC	Myeloids (baboon)	LAMA4	CD44	7.81189e-05	0	LAMA4_CD44	LAMA4 - CD44	LAMININ	ECM-Receptor	KEGG: hsa04512
Fibroblasts	Myeloids (baboon)	LAMA4	CD44	4.34009e-05	0	LAMA4_CD44	LAMA4 - CD44	LAMININ	ECM-Receptor	KEGG: hsa04512
Mural cells	Myeloids (baboon)	LAMA4	CD44	8.68048e-06	0	LAMA4_CD44	LAMA4 - CD44	LAMININ	ECM-Receptor	KEGG: hsa04512
Neuronal cells	Myeloids (baboon)	LAMA4	CD44	8.68048e-06	0	LAMA4_CD44	LAMA4 - CD44	LAMININ	ECM-Receptor	KEGG: hsa04512
Vascular EC	Myeloids (baboon)	LAMA4	CD44	8.68048e-06	0	LAMA4_CD44	LAMA4 - CD44	LAMININ	ECM-Receptor	KEGG: hsa04512
Endocardial/lymphatic EC	Lymphoids (baboon)	LAMB1	CD44	8.68048e-06	0	LAMB1_CD44	LAMB1 - CD44	LAMININ	ECM-Receptor	KEGG: hsa04512
Fibroblasts	Lymphoids (baboon)	LAMB1	CD44	8.68048e-06	0	LAMB1_CD44	LAMB1 - CD44	LAMININ	ECM-Receptor	KEGG: hsa04512
Neuronal cells	Lymphoids (baboon)	LAMB1	CD44	8.68048e-06	0	LAMB1_CD44	LAMB1 - CD44	LAMININ	ECM-Receptor	KEGG: hsa04512
Vascular EC	Lymphoids (baboon)	LAMB1	CD44	8.68048e-06	0	LAMB1_CD44	LAMB1 - CD44	LAMININ	ECM-Receptor	KEGG: hsa04512
Endocardial/lymphatic EC	Mast cells (baboon)	LAMB1	CD44	2.17013e-06	0	LAMB1_CD44	LAMB1 - CD44	LAMININ	ECM-Receptor	KEGG: hsa04512
Fibroblasts	Mast cells (baboon)	LAMB1	CD44	2.17013e-06	0	LAMB1_CD44	LAMB1 - CD44	LAMININ	ECM-Receptor	KEGG: hsa04512
Neuronal cells	Mast cells (baboon)	LAMB1	CD44	2.17013e-06	0	LAMB1_CD44	LAMB1 - CD44	LAMININ	ECM-Receptor	KEGG: hsa04512
Vascular EC	Mast cells (baboon)	LAMB1	CD44	2.17013e-06	0	LAMB1_CD44	LAMB1 - CD44	LAMININ	ECM-Receptor	KEGG: hsa04512
Endocardial/lymphatic EC	Myeloids (baboon)	LAMB1	CD44	8.68048e-06	0	LAMB1_CD44	LAMB1 - CD44	LAMININ	ECM-Receptor	KEGG: hsa04512
Fibroblasts	Myeloids (baboon)	LAMB1	CD44	8.68048e-06	0	LAMB1_CD44	LAMB1 - CD44	LAMININ	ECM-Receptor	KEGG: hsa04512
Neuronal cells	Myeloids (baboon)	LAMB1	CD44	8.68048e-06	0	LAMB1_CD44	LAMB1 - CD44	LAMININ	ECM-Receptor	KEGG: hsa04512
Vascular EC	Myeloids (baboon)	LAMB1	CD44	8.68048e-06	0	LAMB1_CD44	LAMB1 - CD44	LAMININ	ECM-Receptor	KEGG: hsa04512
CM	Lymphoids (baboon)	LAMC1	CD44	4.34009e-05	0	LAMC1_CD44	LAMC1 - CD44	LAMININ	ECM-Receptor	KEGG: hsa04512
Endocardial/lymphatic EC	Lymphoids (baboon)	LAMC1	CD44	4.34009e-05	0	LAMC1_CD44	LAMC1 - CD44	LAMININ	ECM-Receptor	KEGG: hsa04512
Endothelial cells (baboon)	Lymphoids (baboon)	LAMC1	CD44	4.34026e-06	0	LAMC1_CD44	LAMC1 - CD44	LAMININ	ECM-Receptor	KEGG: hsa04512
Fibroblasts	Lymphoids (baboon)	LAMC1	CD44	0.000112834	0	LAMC1_CD44	LAMC1 - CD44	LAMININ	ECM-Receptor	KEGG: hsa04512
Mural cells	Lymphoids (baboon)	LAMC1	CD44	8.68048e-06	0	LAMC1_CD44	LAMC1 - CD44	LAMININ	ECM-Receptor	KEGG: hsa04512
Neuronal cells	Lymphoids (baboon)	LAMC1	CD44	8.68048e-06	0	LAMC1_CD44	LAMC1 - CD44	LAMININ	ECM-Receptor	KEGG: hsa04512
Vascular EC	Lymphoids (baboon)	LAMC1	CD44	8.68048e-06	0	LAMC1_CD44	LAMC1 - CD44	LAMININ	ECM-Receptor	KEGG: hsa04512
CM	Myeloids (baboon)	LAMC1	CD44	4.34009e-05	0	LAMC1_CD44	LAMC1 - CD44	LAMININ	ECM-Receptor	KEGG: hsa04512
Endocardial/lymphatic EC	Myeloids (baboon)	LAMC1	CD44	4.34009e-05	0	LAMC1_CD44	LAMC1 - CD44	LAMININ	ECM-Receptor	KEGG: hsa04512
Endothelial cells (baboon)	Myeloids (baboon)	LAMC1	CD44	4.34026e-06	0	LAMC1_CD44	LAMC1 - CD44	LAMININ	ECM-Receptor	KEGG: hsa04512
Fibroblasts	Myeloids (baboon)	LAMC1	CD44	0.000112834	0	LAMC1_CD44	LAMC1 - CD44	LAMININ	ECM-Receptor	KEGG: hsa04512
Mural cells	Myeloids (baboon)	LAMC1	CD44	8.68048e-06	0	LAMC1_CD44	LAMC1 - CD44	LAMININ	ECM-Receptor	KEGG: hsa04512
Neuronal cells	Myeloids (baboon)	LAMC1	CD44	8.68048e-06	0	LAMC1_CD44	LAMC1 - CD44	LAMININ	ECM-Receptor	KEGG: hsa04512
Vascular EC	Myeloids (baboon)	LAMC1	CD44	8.68048e-06	0	LAMC1_CD44	LAMC1 - CD44	LAMININ	ECM-Receptor	KEGG: hsa04512
Fibroblasts	CM	THBS1	CD36	0.000260349	0	THBS1_CD36	THBS1 - CD36	THBS	ECM-Receptor	KEGG: hsa04512
Fibroblasts	Endocardial/lymphatic EC	THBS1	CD36	5.20806e-05	0	THBS1_CD36	THBS1 - CD36	THBS	ECM-Receptor	KEGG: hsa04512
Fibroblasts	Fibroblasts	THBS1	CD36	5.20806e-05	0	THBS1_CD36	THBS1 - CD36	THBS	ECM-Receptor	KEGG: hsa04512
Fibroblasts	Mural cells	THBS1	CD36	5.20806e-05	0	THBS1_CD36	THBS1 - CD36	THBS	ECM-Receptor	KEGG: hsa04512
Fibroblasts	Resident Immune	THBS1	CD36	0.00020829	0	THBS1_CD36	THBS1 - CD36	THBS	ECM-Receptor	KEGG: hsa04512
Fibroblasts	Vascular EC	THBS1	CD36	0.000104156	0	THBS1_CD36	THBS1 - CD36	THBS	ECM-Receptor	KEGG: hsa04512
Fibroblasts	CM	THBS1	CD47	5.20806e-05	0	THBS1_CD47	THBS1 - CD47	THBS	ECM-Receptor	KEGG: hsa04512
Fibroblasts	Endocardial/lymphatic EC	THBS1	CD47	5.20806e-05	0	THBS1_CD47	THBS1 - CD47	THBS	ECM-Receptor	KEGG: hsa04512
CM	Endothelial cells (baboon)	APP	CD74	1.73608e-05	0	APP_CD74	APP - CD74	APP	Cell-Cell Contact	PMID: 19849849
Endocardial/lymphatic EC	Endothelial cells (baboon)	APP	CD74	1.73608e-05	0	APP_CD74	APP - CD74	APP	Cell-Cell Contact	PMID: 19849849
Endothelial cells (baboon)	Endothelial cells (baboon)	APP	CD74	2.17013e-06	0.01	APP_CD74	APP - CD74	APP	Cell-Cell Contact	PMID: 19849849
Fibroblasts	Endothelial cells (baboon)	APP	CD74	4.34026e-06	0.01	APP_CD74	APP - CD74	APP	Cell-Cell Contact	PMID: 19849849
Mural cells	Endothelial cells (baboon)	APP	CD74	4.34026e-06	0.01	APP_CD74	APP - CD74	APP	Cell-Cell Contact	PMID: 19849849
Neuronal cells	Endothelial cells (baboon)	APP	CD74	4.34026e-06	0.01	APP_CD74	APP - CD74	APP	Cell-Cell Contact	PMID: 19849849
Resident Immune	Endothelial cells (baboon)	APP	CD74	4.34026e-06	0.01	APP_CD74	APP - CD74	APP	Cell-Cell Contact	PMID: 19849849
Vascular EC	Endothelial cells (baboon)	APP	CD74	2.17009e-05	0	APP_CD74	APP - CD74	APP	Cell-Cell Contact	PMID: 19849849
CM	Myeloids (baboon)	APP	CD74	0.00013887	0	APP_CD74	APP - CD74	APP	Cell-Cell Contact	PMID: 19849849
Endocardial/lymphatic EC	Myeloids (baboon)	APP	CD74	0.00013887	0	APP_CD74	APP - CD74	APP	Cell-Cell Contact	PMID: 19849849
Endothelial cells (baboon)	Myeloids (baboon)	APP	CD74	1.73608e-05	0	APP_CD74	APP - CD74	APP	Cell-Cell Contact	PMID: 19849849
Fibroblasts	Myeloids (baboon)	APP	CD74	3.4721e-05	0	APP_CD74	APP - CD74	APP	Cell-Cell Contact	PMID: 19849849
Mural cells	Myeloids (baboon)	APP	CD74	3.4721e-05	0	APP_CD74	APP - CD74	APP	Cell-Cell Contact	PMID: 19849849
Neuronal cells	Myeloids (baboon)	APP	CD74	3.4721e-05	0	APP_CD74	APP - CD74	APP	Cell-Cell Contact	PMID: 19849849
Resident Immune	Myeloids (baboon)	APP	CD74	3.4721e-05	0	APP_CD74	APP - CD74	APP	Cell-Cell Contact	PMID: 19849849
Vascular EC	Myeloids (baboon)	APP	CD74	0.000173581	0	APP_CD74	APP - CD74	APP	Cell-Cell Contact	PMID: 19849849
Neuronal cells	Mast cells (baboon)	CADM1	CADM1	2.17013e-06	0	CADM1_CADM1	CADM1 - CADM1	CADM	Cell-Cell Contact	PMID: 24503895
Resident Immune	Mast cells (baboon)	CADM1	CADM1	2.17013e-06	0.01	CADM1_CADM1	CADM1 - CADM1	CADM	Cell-Cell Contact	PMID: 24503895
Mast cells (baboon)	Neuronal cells	CADM1	CADM1	2.17013e-06	0	CADM1_CADM1	CADM1 - CADM1	CADM	Cell-Cell Contact	PMID: 24503895
Neuronal cells	Neuronal cells	CADM1	CADM1	8.68048e-06	0	CADM1_CADM1	CADM1 - CADM1	CADM	Cell-Cell Contact	PMID: 24503895
Resident Immune	Neuronal cells	CADM1	CADM1	8.68048e-06	0	CADM1_CADM1	CADM1 - CADM1	CADM	Cell-Cell Contact	PMID: 24503895
Mast cells (baboon)	Resident Immune	CADM1	CADM1	2.17013e-06	0.01	CADM1_CADM1	CADM1 - CADM1	CADM	Cell-Cell Contact	PMID: 24503895
Neuronal cells	Resident Immune	CADM1	CADM1	8.68048e-06	0	CADM1_CADM1	CADM1 - CADM1	CADM	Cell-Cell Contact	PMID: 24503895
Resident Immune	Resident Immune	CADM1	CADM1	8.68048e-06	0	CADM1_CADM1	CADM1 - CADM1	CADM	Cell-Cell Contact	PMID: 24503895
Endothelial cells (baboon)	Endocardial/lymphatic EC	PTPRC	MRC1	4.34026e-06	0	PTPRC_MRC1	PTPRC - MRC1	CD45	Cell-Cell Contact	PMID: 27601670; PMID: 10575006
Lymphoids (baboon)	Endocardial/lymphatic EC	PTPRC	MRC1	6.94396e-05	0	PTPRC_MRC1	PTPRC - MRC1	CD45	Cell-Cell Contact	PMID: 27601670; PMID: 10575006
Mast cells (baboon)	Endocardial/lymphatic EC	PTPRC	MRC1	1.73608e-05	0	PTPRC_MRC1	PTPRC - MRC1	CD45	Cell-Cell Contact	PMID: 27601670; PMID: 10575006
Myeloids (baboon)	Endocardial/lymphatic EC	PTPRC	MRC1	2.6041e-05	0	PTPRC_MRC1	PTPRC - MRC1	CD45	Cell-Cell Contact	PMID: 27601670; PMID: 10575006
Resident Immune	Endocardial/lymphatic EC	PTPRC	MRC1	3.4721e-05	0	PTPRC_MRC1	PTPRC - MRC1	CD45	Cell-Cell Contact	PMID: 27601670; PMID: 10575006
Endothelial cells (baboon)	Myeloids (baboon)	PTPRC	MRC1	8.68048e-06	0	PTPRC_MRC1	PTPRC - MRC1	CD45	Cell-Cell Contact	PMID: 27601670; PMID: 10575006
Lymphoids (baboon)	Myeloids (baboon)	PTPRC	MRC1	0.00013887	0	PTPRC_MRC1	PTPRC - MRC1	CD45	Cell-Cell Contact	PMID: 27601670; PMID: 10575006
Mast cells (baboon)	Myeloids (baboon)	PTPRC	MRC1	3.4721e-05	0	PTPRC_MRC1	PTPRC - MRC1	CD45	Cell-Cell Contact	PMID: 27601670; PMID: 10575006
Myeloids (baboon)	Myeloids (baboon)	PTPRC	MRC1	5.20806e-05	0	PTPRC_MRC1	PTPRC - MRC1	CD45	Cell-Cell Contact	PMID: 27601670; PMID: 10575006
Resident Immune	Myeloids (baboon)	PTPRC	MRC1	6.94396e-05	0	PTPRC_MRC1	PTPRC - MRC1	CD45	Cell-Cell Contact	PMID: 27601670; PMID: 10575006
Endothelial cells (baboon)	Resident Immune	PTPRC	MRC1	2.6041e-05	0	PTPRC_MRC1	PTPRC - MRC1	CD45	Cell-Cell Contact	PMID: 27601670; PMID: 10575006
Lymphoids (baboon)	Resident Immune	PTPRC	MRC1	0.000416493	0	PTPRC_MRC1	PTPRC - MRC1	CD45	Cell-Cell Contact	PMID: 27601670; PMID: 10575006
Mast cells (baboon)	Resident Immune	PTPRC	MRC1	0.000104156	0	PTPRC_MRC1	PTPRC - MRC1	CD45	Cell-Cell Contact	PMID: 27601670; PMID: 10575006
Myeloids (baboon)	Resident Immune	PTPRC	MRC1	0.000156226	0	PTPRC_MRC1	PTPRC - MRC1	CD45	Cell-Cell Contact	PMID: 27601670; PMID: 10575006
Resident Immune	Resident Immune	PTPRC	MRC1	0.00020829	0	PTPRC_MRC1	PTPRC - MRC1	CD45	Cell-Cell Contact	PMID: 27601670; PMID: 10575006
Endothelial cells (baboon)	Endothelial cells (baboon)	CD99	CD99	2.17013e-06	0	CD99_CD99	CD99 - CD99	CD99	Cell-Cell Contact	KEGG: hsa04514
CM	CM	CDH2	CDH2	0.0117441	0	CDH2_CDH2	CDH2 - CDH2	CDH	Cell-Cell Contact	KEGG: hsa04514
Vascular EC	Vascular EC	CDH5	CDH5	8.68048e-06	0	CDH5_CDH5	CDH5 - CDH5	CDH5	Cell-Cell Contact	KEGG: hsa04514
CM	Endocardial/lymphatic EC	EFNA5	EPHA4	0.000173581	0	EFNA5_EPHA4	EFNA5 - EPHA4	EPHA	Cell-Cell Contact	PMID: 15114347
Endocardial/lymphatic EC	Endocardial/lymphatic EC	EFNA5	EPHA4	1.73608e-05	0	EFNA5_EPHA4	EFNA5 - EPHA4	EPHA	Cell-Cell Contact	PMID: 15114347
CM	Neuronal cells	EFNA5	EPHA5	8.6798e-05	0	EFNA5_EPHA5	EFNA5 - EPHA5	EPHA	Cell-Cell Contact	PMID: 15114347
Endocardial/lymphatic EC	Neuronal cells	EFNA5	EPHA5	8.68048e-06	0	EFNA5_EPHA5	EFNA5 - EPHA5	EPHA	Cell-Cell Contact	PMID: 15114347
Endothelial cells (baboon)	Endocardial/lymphatic EC	EFNB2	EPHA4	8.68048e-06	0	EFNB2_EPHA4	EFNB2 - EPHA4	EPHB	Cell-Cell Contact	PMID: 15114347
Endothelial cells (baboon)	Endocardial/lymphatic EC	EFNB2	EPHB1	4.34026e-06	0	EFNB2_EPHB1	EFNB2 - EPHB1	EPHB	Cell-Cell Contact	PMID: 15114347
Vascular EC	Vascular EC	ESAM	ESAM	8.68048e-06	0	ESAM_ESAM	ESAM - ESAM	ESAM	Cell-Cell Contact	KEGG: hsa04514; PMID: 11279107
Vascular EC	Vascular EC	JAM3	JAM3	8.68048e-06	0	JAM3_JAM3	JAM3 - JAM3	JAM	Cell-Cell Contact	KEGG: hsa04514
CM	CM	NCAM1	FGFR1	0.000104156	0	NCAM1_FGFR1	NCAM1 - FGFR1	NCAM	Cell-Cell Contact	PMID: 12791257
CM	Fibroblasts	NCAM1	FGFR1	3.4721e-05	0	NCAM1_FGFR1	NCAM1 - FGFR1	NCAM	Cell-Cell Contact	PMID: 12791257
CM	CM	NCAM1	NCAM1	0.00013887	0	NCAM1_NCAM1	NCAM1 - NCAM1	NCAM	Cell-Cell Contact	KEGG: hsa04514
CM	Neuronal cells	NCAM1	NCAM2	0.00013887	0	NCAM1_NCAM2	NCAM1 - NCAM2	NCAM	Cell-Cell Contact	KEGG: hsa04514
Neuronal cells	Neuronal cells	NCAM1	NCAM2	3.4721e-05	0	NCAM1_NCAM2	NCAM1 - NCAM2	NCAM	Cell-Cell Contact	KEGG: hsa04514
Fibroblasts	Fibroblasts	NEGR1	NEGR1	8.68048e-06	0	NEGR1_NEGR1	NEGR1 - NEGR1	NEGR	Cell-Cell Contact	KEGG: hsa04514
Neuronal cells	Endocardial/lymphatic EC	LRRC4C	NTNG1	8.68048e-06	0	LRRC4C_NTNG1	LRRC4C - NTNG1	NGL	Cell-Cell Contact	KEGG: hsa04514
Endocardial/lymphatic EC	Endothelial cells (baboon)	JAG1	NOTCH1	8.68048e-06	0	JAG1_NOTCH1	JAG1 - NOTCH1	NOTCH	Cell-Cell Contact	PMID: 22353464
Endothelial cells (baboon)	Endothelial cells (baboon)	JAG1	NOTCH1	4.34026e-06	0	JAG1_NOTCH1	JAG1 - NOTCH1	NOTCH	Cell-Cell Contact	PMID: 22353464
Vascular EC	Endothelial cells (baboon)	JAG1	NOTCH1	8.68048e-06	0	JAG1_NOTCH1	JAG1 - NOTCH1	NOTCH	Cell-Cell Contact	PMID: 22353464
Endocardial/lymphatic EC	Endothelial cells (baboon)	JAG1	NOTCH2	4.34026e-06	0	JAG1_NOTCH2	JAG1 - NOTCH2	NOTCH	Cell-Cell Contact	PMID: 22353464
Endothelial cells (baboon)	Endothelial cells (baboon)	JAG1	NOTCH2	2.17013e-06	0	JAG1_NOTCH2	JAG1 - NOTCH2	NOTCH	Cell-Cell Contact	PMID: 22353464
Vascular EC	Endothelial cells (baboon)	JAG1	NOTCH2	4.34026e-06	0	JAG1_NOTCH2	JAG1 - NOTCH2	NOTCH	Cell-Cell Contact	PMID: 22353464
Endocardial/lymphatic EC	Fibroblasts	JAG1	NOTCH2	8.68048e-06	0	JAG1_NOTCH2	JAG1 - NOTCH2	NOTCH	Cell-Cell Contact	PMID: 22353464
Endothelial cells (baboon)	Fibroblasts	JAG1	NOTCH2	4.34026e-06	0	JAG1_NOTCH2	JAG1 - NOTCH2	NOTCH	Cell-Cell Contact	PMID: 22353464
Vascular EC	Fibroblasts	JAG1	NOTCH2	8.68048e-06	0	JAG1_NOTCH2	JAG1 - NOTCH2	NOTCH	Cell-Cell Contact	PMID: 22353464
Endocardial/lymphatic EC	Mural cells	JAG1	NOTCH2	8.68048e-06	0	JAG1_NOTCH2	JAG1 - NOTCH2	NOTCH	Cell-Cell Contact	PMID: 22353464
Endothelial cells (baboon)	Mural cells	JAG1	NOTCH2	4.34026e-06	0	JAG1_NOTCH2	JAG1 - NOTCH2	NOTCH	Cell-Cell Contact	PMID: 22353464
Vascular EC	Mural cells	JAG1	NOTCH2	8.68048e-06	0	JAG1_NOTCH2	JAG1 - NOTCH2	NOTCH	Cell-Cell Contact	PMID: 22353464
Endocardial/lymphatic EC	Myeloids (baboon)	JAG1	NOTCH2	8.68048e-06	0	JAG1_NOTCH2	JAG1 - NOTCH2	NOTCH	Cell-Cell Contact	PMID: 22353464
Endothelial cells (baboon)	Myeloids (baboon)	JAG1	NOTCH2	4.34026e-06	0	JAG1_NOTCH2	JAG1 - NOTCH2	NOTCH	Cell-Cell Contact	PMID: 22353464
Vascular EC	Myeloids (baboon)	JAG1	NOTCH2	8.68048e-06	0	JAG1_NOTCH2	JAG1 - NOTCH2	NOTCH	Cell-Cell Contact	PMID: 22353464
Endocardial/lymphatic EC	Mural cells	JAG1	NOTCH3	8.68048e-06	0	JAG1_NOTCH3	JAG1 - NOTCH3	NOTCH	Cell-Cell Contact	PMID: 22353464
Endothelial cells (baboon)	Mural cells	JAG1	NOTCH3	4.34026e-06	0	JAG1_NOTCH3	JAG1 - NOTCH3	NOTCH	Cell-Cell Contact	PMID: 22353464
Vascular EC	Mural cells	JAG1	NOTCH3	8.68048e-06	0	JAG1_NOTCH3	JAG1 - NOTCH3	NOTCH	Cell-Cell Contact	PMID: 22353464
Neuronal cells	Neuronal cells	NRXN1	NLGN1	0.000104156	0	NRXN1_NLGN1	NRXN1 - NLGN1	NRXN	Cell-Cell Contact	KEGG: hsa04514
Endocardial/lymphatic EC	Endocardial/lymphatic EC	PECAM1	PECAM1	0.000425166	0	PECAM1_PECAM1	PECAM1 - PECAM1	PECAM1	Cell-Cell Contact	KEGG: hsa04514
Endothelial cells (baboon)	Endocardial/lymphatic EC	PECAM1	PECAM1	0.000121513	0	PECAM1_PECAM1	PECAM1 - PECAM1	PECAM1	Cell-Cell Contact	KEGG: hsa04514
Fibroblasts	Endocardial/lymphatic EC	PECAM1	PECAM1	6.07602e-05	0	PECAM1_PECAM1	PECAM1 - PECAM1	PECAM1	Cell-Cell Contact	KEGG: hsa04514
Vascular EC	Endocardial/lymphatic EC	PECAM1	PECAM1	0.000303727	0	PECAM1_PECAM1	PECAM1 - PECAM1	PECAM1	Cell-Cell Contact	KEGG: hsa04514
Endocardial/lymphatic EC	Endothelial cells (baboon)	PECAM1	PECAM1	0.000121513	0	PECAM1_PECAM1	PECAM1 - PECAM1	PECAM1	Cell-Cell Contact	KEGG: hsa04514
Endothelial cells (baboon)	Endothelial cells (baboon)	PECAM1	PECAM1	3.4721e-05	0	PECAM1_PECAM1	PECAM1 - PECAM1	PECAM1	Cell-Cell Contact	KEGG: hsa04514
Fibroblasts	Endothelial cells (baboon)	PECAM1	PECAM1	1.73608e-05	0	PECAM1_PECAM1	PECAM1 - PECAM1	PECAM1	Cell-Cell Contact	KEGG: hsa04514
Vascular EC	Endothelial cells (baboon)	PECAM1	PECAM1	8.6798e-05	0	PECAM1_PECAM1	PECAM1 - PECAM1	PECAM1	Cell-Cell Contact	KEGG: hsa04514
Endocardial/lymphatic EC	Fibroblasts	PECAM1	PECAM1	6.07602e-05	0	PECAM1_PECAM1	PECAM1 - PECAM1	PECAM1	Cell-Cell Contact	KEGG: hsa04514
Endothelial cells (baboon)	Fibroblasts	PECAM1	PECAM1	1.73608e-05	0	PECAM1_PECAM1	PECAM1 - PECAM1	PECAM1	Cell-Cell Contact	KEGG: hsa04514
Fibroblasts	Fibroblasts	PECAM1	PECAM1	8.68048e-06	0	PECAM1_PECAM1	PECAM1 - PECAM1	PECAM1	Cell-Cell Contact	KEGG: hsa04514
Vascular EC	Fibroblasts	PECAM1	PECAM1	4.34009e-05	0	PECAM1_PECAM1	PECAM1 - PECAM1	PECAM1	Cell-Cell Contact	KEGG: hsa04514
Endocardial/lymphatic EC	Vascular EC	PECAM1	PECAM1	0.000303727	0	PECAM1_PECAM1	PECAM1 - PECAM1	PECAM1	Cell-Cell Contact	KEGG: hsa04514
Endothelial cells (baboon)	Vascular EC	PECAM1	PECAM1	8.6798e-05	0	PECAM1_PECAM1	PECAM1 - PECAM1	PECAM1	Cell-Cell Contact	KEGG: hsa04514
Fibroblasts	Vascular EC	PECAM1	PECAM1	4.34009e-05	0	PECAM1_PECAM1	PECAM1 - PECAM1	PECAM1	Cell-Cell Contact	KEGG: hsa04514
Vascular EC	Vascular EC	PECAM1	PECAM1	0.000216967	0	PECAM1_PECAM1	PECAM1 - PECAM1	PECAM1	Cell-Cell Contact	KEGG: hsa04514
CM	CM	PTPRM	PTPRM	0.00146486	0	PTPRM_PTPRM	PTPRM - PTPRM	PTPRM	Cell-Cell Contact	KEGG: hsa04514
Endocardial/lymphatic EC	CM	PTPRM	PTPRM	0.00191473	0	PTPRM_PTPRM	PTPRM - PTPRM	PTPRM	Cell-Cell Contact	KEGG: hsa04514
Vascular EC	CM	PTPRM	PTPRM	0.00292544	0	PTPRM_PTPRM	PTPRM - PTPRM	PTPRM	Cell-Cell Contact	KEGG: hsa04514
CM	Endocardial/lymphatic EC	PTPRM	PTPRM	0.00191473	0	PTPRM_PTPRM	PTPRM - PTPRM	PTPRM	Cell-Cell Contact	KEGG: hsa04514
Endocardial/lymphatic EC	Endocardial/lymphatic EC	PTPRM	PTPRM	0.0025024	0	PTPRM_PTPRM	PTPRM - PTPRM	PTPRM	Cell-Cell Contact	KEGG: hsa04514
Vascular EC	Endocardial/lymphatic EC	PTPRM	PTPRM	0.00382214	0	PTPRM_PTPRM	PTPRM - PTPRM	PTPRM	Cell-Cell Contact	KEGG: hsa04514
Vascular EC	Fibroblasts	PTPRM	PTPRM	0.00202713	0	PTPRM_PTPRM	PTPRM - PTPRM	PTPRM	Cell-Cell Contact	KEGG: hsa04514
CM	Vascular EC	PTPRM	PTPRM	0.00292544	0	PTPRM_PTPRM	PTPRM - PTPRM	PTPRM	Cell-Cell Contact	KEGG: hsa04514
Endocardial/lymphatic EC	Vascular EC	PTPRM	PTPRM	0.00382214	0	PTPRM_PTPRM	PTPRM - PTPRM	PTPRM	Cell-Cell Contact	KEGG: hsa04514
Fibroblasts	Vascular EC	PTPRM	PTPRM	0.00202713	0	PTPRM_PTPRM	PTPRM - PTPRM	PTPRM	Cell-Cell Contact	KEGG: hsa04514
Vascular EC	Vascular EC	PTPRM	PTPRM	0.00583382	0	PTPRM_PTPRM	PTPRM - PTPRM	PTPRM	Cell-Cell Contact	KEGG: hsa04514
Endocardial/lymphatic EC	Endocardial/lymphatic EC	SEMA6A	PLXNA2	4.34009e-05	0	SEMA6A_PLXNA2	SEMA6A - PLXNA2	SEMA6	Cell-Cell Contact	PMID: 27533782
Vascular EC	Endocardial/lymphatic EC	SEMA6A	PLXNA2	8.68048e-06	0	SEMA6A_PLXNA2	SEMA6A - PLXNA2	SEMA6	Cell-Cell Contact	PMID: 27533782
Endocardial/lymphatic EC	Endothelial cells (baboon)	SEMA6A	PLXNA2	4.34009e-05	0	SEMA6A_PLXNA2	SEMA6A - PLXNA2	SEMA6	Cell-Cell Contact	PMID: 27533782
Vascular EC	Endothelial cells (baboon)	SEMA6A	PLXNA2	8.68048e-06	0	SEMA6A_PLXNA2	SEMA6A - PLXNA2	SEMA6	Cell-Cell Contact	PMID: 27533782
Endocardial/lymphatic EC	Vascular EC	SEMA6A	PLXNA2	4.34009e-05	0	SEMA6A_PLXNA2	SEMA6A - PLXNA2	SEMA6	Cell-Cell Contact	PMID: 27533782
Vascular EC	Vascular EC	SEMA6A	PLXNA2	8.68048e-06	0	SEMA6A_PLXNA2	SEMA6A - PLXNA2	SEMA6	Cell-Cell Contact	PMID: 27533782
Endocardial/lymphatic EC	CM	SEMA6A	PLXNA4	4.34009e-05	0	SEMA6A_PLXNA4	SEMA6A - PLXNA4	SEMA6	Cell-Cell Contact	PMID: 27533782
Vascular EC	CM	SEMA6A	PLXNA4	8.68048e-06	0	SEMA6A_PLXNA4	SEMA6A - PLXNA4	SEMA6	Cell-Cell Contact	PMID: 27533782
Endocardial/lymphatic EC	Endocardial/lymphatic EC	SEMA6A	PLXNA4	4.34009e-05	0	SEMA6A_PLXNA4	SEMA6A - PLXNA4	SEMA6	Cell-Cell Contact	PMID: 27533782
Vascular EC	Endocardial/lymphatic EC	SEMA6A	PLXNA4	8.68048e-06	0	SEMA6A_PLXNA4	SEMA6A - PLXNA4	SEMA6	Cell-Cell Contact	PMID: 27533782
Endocardial/lymphatic EC	Fibroblasts	SEMA6A	PLXNA4	0.000216967	0	SEMA6A_PLXNA4	SEMA6A - PLXNA4	SEMA6	Cell-Cell Contact	PMID: 27533782
Vascular EC	Fibroblasts	SEMA6A	PLXNA4	4.34009e-05	0	SEMA6A_PLXNA4	SEMA6A - PLXNA4	SEMA6	Cell-Cell Contact	PMID: 27533782
