# Supplementary material for: Integrated Molecular Profiling of Preclinical and Clinical Cardiac Xenotransplants
Source: Research Square preprint supplement (doi:10.21203/rs.3.rs-8406985/v1), 2026-02-04
Supplement: Supplementary file 10 [file 462f40b2b57b703f2b9eddce.xlsx]

## Sheet: Rej vs 3-month protocol
Gene	Comparison	Log2FC	p_value	p_adj	Significance
ADH7_PAPAN	Rejection vs 3-month protocol	3.54862	0.0242424	0.475152	Not Significant
CPS1_PAPAN	Rejection vs 3-month protocol	2.57668	0.230303	0.735028	Not Significant
CHI3L1_PIG	Rejection vs 3-month protocol	2.45286	0.0424242	0.523547	Not Significant
CKM_PIG	Rejection vs 3-month protocol	2.37419	0.0242424	0.475152	Not Significant
H1-5_PAPAN	Rejection vs 3-month protocol	2.06293	0.230303	0.735028	Not Significant
ISG15_PAPAN	Rejection vs 3-month protocol	2.04863	0.0121212	0.475152	Not Significant
MX1_PAPAN	Rejection vs 3-month protocol	2.03833	0.0121212	0.475152	Not Significant
KRT16_PAPAN	Rejection vs 3-month protocol	2.02499	0.230303	0.735028	Not Significant
ECI1_PAPAN	Rejection vs 3-month protocol	2.00006	0.163636	0.706265	Not Significant
AEBP1_PIG	Rejection vs 3-month protocol	1.99303	0.0727273	0.608862	Not Significant
ADH4_PAPAN	Rejection vs 3-month protocol	1.88746	0.109091	0.660893	Not Significant
SORD_PAPAN	Rejection vs 3-month protocol	1.8742	0.0242424	0.475152	Not Significant
ECHS1_PAPAN	Rejection vs 3-month protocol	1.82821	0.109091	0.660893	Not Significant
PYGM_PAPAN	Rejection vs 3-month protocol	1.77624	0.527273	0.884629	Not Significant
RPL23A_PIG	Rejection vs 3-month protocol	1.74818	0.00606061	0.438999	Not Significant
MDH2_PAPAN	Rejection vs 3-month protocol	1.72931	0.00606061	0.438999	Not Significant
PARVG_PAPAN	Rejection vs 3-month protocol	1.7195	0.0242424	0.475152	Not Significant
MFAP4_PAPAN	Rejection vs 3-month protocol	1.63702	0.163636	0.706265	Not Significant
LAP3_PAPAN	Rejection vs 3-month protocol	1.60243	0.230303	0.735028	Not Significant
SELE_PAPAN	Rejection vs 3-month protocol	1.55495	0.0424242	0.523547	Not Significant
PTGES3_PIG	Rejection vs 3-month protocol	1.54862	0.0424242	0.523547	Not Significant
CP_PIG	Rejection vs 3-month protocol	1.50943	0.0727273	0.608862	Not Significant
FASN_PIG	Rejection vs 3-month protocol	1.48584	0.0121212	0.475152	Not Significant
LMNA_PAPAN	Rejection vs 3-month protocol	1.48212	0.230303	0.735028	Not Significant
F9_PIG	Rejection vs 3-month protocol	1.47578	0.230303	0.735028	Not Significant
PSMD1_PAPAN	Rejection vs 3-month protocol	1.47125	0.00606061	0.438999	Not Significant
COL5A3_PIG	Rejection vs 3-month protocol	1.44772	0.00606061	0.438999	Not Significant
VASP_PIG	Rejection vs 3-month protocol	1.44161	0.0121212	0.475152	Not Significant
KRT4_PAPAN	Rejection vs 3-month protocol	1.43977	0.0242424	0.475152	Not Significant
OAT_PAPAN	Rejection vs 3-month protocol	1.43216	0.0727273	0.608862	Not Significant
RPN2_PAPAN	Rejection vs 3-month protocol	1.37783	0.527273	0.884629	Not Significant
SRSF3_PIG	Rejection vs 3-month protocol	1.3682	0.0121212	0.475152	Not Significant
FCGR1A_PAPAN	Rejection vs 3-month protocol	1.33335	0.527273	0.884629	Not Significant
SNRPE_PIG	Rejection vs 3-month protocol	1.33187	0.412121	0.83731	Not Significant
IPO11_PAPAN	Rejection vs 3-month protocol	1.32283	0.0424242	0.523547	Not Significant
ECM1_PIG	Rejection vs 3-month protocol	1.30491	0.163636	0.706265	Not Significant
EEF1D_PAPAN	Rejection vs 3-month protocol	1.29674	0.0727273	0.608862	Not Significant
ITGAM_PAPAN	Rejection vs 3-month protocol	1.28967	0.0727273	0.608862	Not Significant
APOH_PIG	Rejection vs 3-month protocol	1.27864	0.412121	0.83731	Not Significant
NARS1_PAPAN	Rejection vs 3-month protocol	1.24944	0.109091	0.660893	Not Significant
THBS2_PAPAN	Rejection vs 3-month protocol	1.24868	0.0242424	0.475152	Not Significant
HGF_PAPAN	Rejection vs 3-month protocol	1.23667	0.163636	0.706265	Not Significant
GSTM4_PAPAN	Rejection vs 3-month protocol	1.23228	0.315152	0.795519	Not Significant
ACTN3_PAPAN	Rejection vs 3-month protocol	1.22161	0.412121	0.83731	Not Significant
FTH1_PAPAN	Rejection vs 3-month protocol	1.21977	0.527273	0.884629	Not Significant
WARS1_PAPAN	Rejection vs 3-month protocol	1.21884	0.412121	0.83731	Not Significant
XRCC6_PAPAN	Rejection vs 3-month protocol	1.21308	0.0242424	0.475152	Not Significant
MYOT_PAPAN	Rejection vs 3-month protocol	1.20077	0.412121	0.83731	Not Significant
TTN_PAPAN	Rejection vs 3-month protocol	1.19952	0.230303	0.735028	Not Significant
PODN_PAPAN	Rejection vs 3-month protocol	1.19372	0.787879	0.942964	Not Significant
OAS3_PAPAN	Rejection vs 3-month protocol	1.18785	0.109091	0.660893	Not Significant
CNDP1_PAPAN	Rejection vs 3-month protocol	1.16119	0.0727273	0.608862	Not Significant
PEAR1_PAPAN	Rejection vs 3-month protocol	1.15874	0.230303	0.735028	Not Significant
MTDH_PAPAN	Rejection vs 3-month protocol	1.15766	0.0424242	0.523547	Not Significant
TRIM72_PAPAN	Rejection vs 3-month protocol	1.13196	0.230303	0.735028	Not Significant
LTF_PAPAN	Rejection vs 3-month protocol	1.13152	0.412121	0.83731	Not Significant
SERPINE1_PAPAN	Rejection vs 3-month protocol	1.12613	0.0242424	0.475152	Not Significant
IARS1_PAPAN	Rejection vs 3-month protocol	1.12308	0.527273	0.884629	Not Significant
HMOX1_PAPAN	Rejection vs 3-month protocol	1.11877	0.109091	0.660893	Not Significant
KRT2_PAPAN	Rejection vs 3-month protocol	1.11617	0.230303	0.735028	Not Significant
SPON1_PAPAN	Rejection vs 3-month protocol	1.10867	0.163636	0.706265	Not Significant
COL1A2_PAPAN	Rejection vs 3-month protocol	1.09983	0.109091	0.660893	Not Significant
RCC1_PIG	Rejection vs 3-month protocol	1.09739	0.0424242	0.523547	Not Significant
RIPK1_PAPAN	Rejection vs 3-month protocol	1.09379	0.109091	0.660893	Not Significant
LGALS3_PIG	Rejection vs 3-month protocol	1.09209	0.315152	0.795519	Not Significant
MAP2K3_PAPAN	Rejection vs 3-month protocol	1.08851	0.0424242	0.523547	Not Significant
SYNGR2_PAPAN	Rejection vs 3-month protocol	1.08766	0.230303	0.735028	Not Significant
CNOT1_PIG	Rejection vs 3-month protocol	1.08629	0.0424242	0.523547	Not Significant
CUL4A_PAPAN	Rejection vs 3-month protocol	1.07955	0.0424242	0.523547	Not Significant
PDCD11_PAPAN	Rejection vs 3-month protocol	1.07831	0.163636	0.706265	Not Significant
UQCRC2_PAPAN	Rejection vs 3-month protocol	1.07378	0.412121	0.83731	Not Significant
FGD3_PAPAN	Rejection vs 3-month protocol	1.06902	0.00606061	0.438999	Not Significant
PDLIM3_PAPAN	Rejection vs 3-month protocol	1.05848	0.412121	0.83731	Not Significant
TNFSF12_PAPAN	Rejection vs 3-month protocol	1.05697	0.163636	0.706265	Not Significant
COPA_PAPAN	Rejection vs 3-month protocol	1.04128	0.0121212	0.475152	Not Significant
IL1RL1_PAPAN	Rejection vs 3-month protocol	1.03241	0.412121	0.83731	Not Significant
ACAA1_PAPAN	Rejection vs 3-month protocol	1.03183	0.163636	0.706265	Not Significant
USO1_PAPAN	Rejection vs 3-month protocol	1.01725	0.412121	0.83731	Not Significant
ECHDC2_PAPAN	Rejection vs 3-month protocol	1.01607	0.230303	0.735028	Not Significant
CFH_PIG	Rejection vs 3-month protocol	1.00295	0.315152	0.795519	Not Significant
GRHPR_PAPAN	Rejection vs 3-month protocol	1.00125	0.230303	0.735028	Not Significant
SQOR_PAPAN	Rejection vs 3-month protocol	0.99268	0.230303	0.735028	Not Significant
LMCD1_PAPAN	Rejection vs 3-month protocol	0.991943	0.787879	0.942964	Not Significant
LTBP2_PAPAN	Rejection vs 3-month protocol	0.987104	0.0424242	0.523547	Not Significant
ERP44_PAPAN	Rejection vs 3-month protocol	0.984091	0.163636	0.706265	Not Significant
NMRAL1_PAPAN	Rejection vs 3-month protocol	0.983235	0.0242424	0.475152	Not Significant
KRT5_PAPAN	Rejection vs 3-month protocol	0.968404	0.230303	0.735028	Not Significant
COL3A1_PAPAN	Rejection vs 3-month protocol	0.955187	0.0424242	0.523547	Not Significant
ADM_PAPAN	Rejection vs 3-month protocol	0.933194	0.163636	0.706265	Not Significant
MOB3A_PAPAN	Rejection vs 3-month protocol	0.929427	0.163636	0.706265	Not Significant
PC_PAPAN	Rejection vs 3-month protocol	0.924848	0.230303	0.735028	Not Significant
POSTN_PIG	Rejection vs 3-month protocol	0.924674	0.315152	0.795519	Not Significant
DNMT1_PAPAN	Rejection vs 3-month protocol	0.921825	0.787879	0.942964	Not Significant
BST2_PAPAN	Rejection vs 3-month protocol	0.921687	0.787879	0.942964	Not Significant
MDH1_PIG	Rejection vs 3-month protocol	0.920948	0.109091	0.660893	Not Significant
ESAM_PAPAN	Rejection vs 3-month protocol	0.916479	0.787879	0.942964	Not Significant
RPS11_PIG	Rejection vs 3-month protocol	0.90925	0.163636	0.706265	Not Significant
KRT34_PAPAN	Rejection vs 3-month protocol	0.907334	0.527273	0.884629	Not Significant
GIMAP4_PAPAN	Rejection vs 3-month protocol	0.903719	0.0242424	0.475152	Not Significant
CMTM5_PAPAN	Rejection vs 3-month protocol	0.901894	0.163636	0.706265	Not Significant
TKFC_PAPAN	Rejection vs 3-month protocol	0.900184	0.109091	0.660893	Not Significant
CUL2_PAPAN	Rejection vs 3-month protocol	0.897788	0.412121	0.83731	Not Significant
KRT14_PAPAN	Rejection vs 3-month protocol	0.89759	0.412121	0.83731	Not Significant
RBM39_PIG	Rejection vs 3-month protocol	0.894504	0.648485	0.929755	Not Significant
CCL21_PAPAN	Rejection vs 3-month protocol	0.892073	0.787879	0.942964	Not Significant
RCSD1_PAPAN	Rejection vs 3-month protocol	0.886384	0.109091	0.660893	Not Significant
ACO2_PAPAN	Rejection vs 3-month protocol	0.88545	0.0727273	0.608862	Not Significant
PGAM2_PAPAN	Rejection vs 3-month protocol	0.884007	0.230303	0.735028	Not Significant
CUL3_PAPAN	Rejection vs 3-month protocol	0.882525	0.0727273	0.608862	Not Significant
TMEM40_PAPAN	Rejection vs 3-month protocol	0.882389	0.230303	0.735028	Not Significant
ADHFE1_PAPAN	Rejection vs 3-month protocol	0.880342	0.230303	0.735028	Not Significant
PTPRJ_PAPAN	Rejection vs 3-month protocol	0.879809	0.109091	0.660893	Not Significant
CPA1_PAPAN	Rejection vs 3-month protocol	0.875438	0.0424242	0.523547	Not Significant
CYP2D6_PAPAN	Rejection vs 3-month protocol	0.872031	0.0424242	0.523547	Not Significant
SLFN5_PAPAN	Rejection vs 3-month protocol	0.870408	0.315152	0.795519	Not Significant
NCSTN_PAPAN	Rejection vs 3-month protocol	0.866808	0.787879	0.942964	Not Significant
RANGAP1_PAPAN	Rejection vs 3-month protocol	0.861599	0.648485	0.929755	Not Significant
HNRNPC_PAPAN	Rejection vs 3-month protocol	0.859049	0.0727273	0.608862	Not Significant
CA3_PAPAN	Rejection vs 3-month protocol	0.856728	0.230303	0.735028	Not Significant
ALDOB_PAPAN	Rejection vs 3-month protocol	0.852905	0.412121	0.83731	Not Significant
STAMBPL1_PAPAN	Rejection vs 3-month protocol	0.842427	0.0727273	0.608862	Not Significant
PTPN12_PAPAN	Rejection vs 3-month protocol	0.837667	0.0121212	0.475152	Not Significant
PKM_PIG	Rejection vs 3-month protocol	0.832889	0.109091	0.660893	Not Significant
DLD_PAPAN	Rejection vs 3-month protocol	0.832325	0.109091	0.660893	Not Significant
ICAM2_PAPAN	Rejection vs 3-month protocol	0.831521	0.163636	0.706265	Not Significant
SFRP1_PIG	Rejection vs 3-month protocol	0.829308	0.527273	0.884629	Not Significant
HSPB1_PIG	Rejection vs 3-month protocol	0.822881	0.412121	0.83731	Not Significant
ARHGAP4_PAPAN	Rejection vs 3-month protocol	0.822428	0.109091	0.660893	Not Significant
IGFBP7_PAPAN	Rejection vs 3-month protocol	0.817707	0.0727273	0.608862	Not Significant
DES_PIG	Rejection vs 3-month protocol	0.814914	0.648485	0.929755	Not Significant
FST_PAPAN	Rejection vs 3-month protocol	0.811862	0.412121	0.83731	Not Significant
KRT9_PAPAN	Rejection vs 3-month protocol	0.801841	0.230303	0.735028	Not Significant
MTCH2_PAPAN	Rejection vs 3-month protocol	0.787282	0.163636	0.706265	Not Significant
PSMD4_PIG	Rejection vs 3-month protocol	0.782721	0.00606061	0.438999	Not Significant
DSP_PAPAN	Rejection vs 3-month protocol	0.781536	0.230303	0.735028	Not Significant
CD177_PAPAN	Rejection vs 3-month protocol	0.780703	0.230303	0.735028	Not Significant
HSD17B10_PAPAN	Rejection vs 3-month protocol	0.774385	0.412121	0.83731	Not Significant
CYP4V2_PAPAN	Rejection vs 3-month protocol	0.770908	0.230303	0.735028	Not Significant
IL1RN_PAPAN	Rejection vs 3-month protocol	0.770005	0.412121	0.83731	Not Significant
SVEP1_PAPAN	Rejection vs 3-month protocol	0.768777	0.412121	0.83731	Not Significant
CCDC80_PAPAN	Rejection vs 3-month protocol	0.765218	0.230303	0.735028	Not Significant
CBR1_PAPAN	Rejection vs 3-month protocol	0.761906	0.230303	0.735028	Not Significant
MYBPC2_PIG	Rejection vs 3-month protocol	0.761752	0.230303	0.735028	Not Significant
SERPINB10_PAPAN	Rejection vs 3-month protocol	0.757723	0.648485	0.929755	Not Significant
PLEC_PAPAN	Rejection vs 3-month protocol	0.755811	0.412121	0.83731	Not Significant
SARDH_PAPAN	Rejection vs 3-month protocol	0.754462	0.163636	0.706265	Not Significant
TARS1_PAPAN	Rejection vs 3-month protocol	0.753043	1	1	Not Significant
CDK11_PIG	Rejection vs 3-month protocol	0.751352	0.230303	0.735028	Not Significant
PRELP_PAPAN	Rejection vs 3-month protocol	0.7506	0.230303	0.735028	Not Significant
DNASE1L3_PAPAN	Rejection vs 3-month protocol	0.749738	0.787879	0.942964	Not Significant
LANCL1_PAPAN	Rejection vs 3-month protocol	0.742962	0.163636	0.706265	Not Significant
HHIP_PAPAN	Rejection vs 3-month protocol	0.737588	0.787879	0.942964	Not Significant
PTX3_PAPAN	Rejection vs 3-month protocol	0.737266	0.412121	0.83731	Not Significant
ECHDC1_PAPAN	Rejection vs 3-month protocol	0.73622	0.527273	0.884629	Not Significant
AACS_PAPAN	Rejection vs 3-month protocol	0.734627	0.109091	0.660893	Not Significant
ALPK3_PAPAN	Rejection vs 3-month protocol	0.729866	0.230303	0.735028	Not Significant
SMOC2_PIG	Rejection vs 3-month protocol	0.728053	0.648485	0.929755	Not Significant
ACSL6_PAPAN	Rejection vs 3-month protocol	0.716038	0.163636	0.706265	Not Significant
USP9X_PAPAN	Rejection vs 3-month protocol	0.714273	0.412121	0.83731	Not Significant
SEPTIN9_PAPAN	Rejection vs 3-month protocol	0.710589	0.527273	0.884629	Not Significant
CRABP2_PAPAN	Rejection vs 3-month protocol	0.704663	0.230303	0.735028	Not Significant
VWF_PIG	Rejection vs 3-month protocol	0.698489	0.315152	0.795519	Not Significant
ASPDH_PAPAN	Rejection vs 3-month protocol	0.696317	0.648485	0.929755	Not Significant
AGMAT_PAPAN	Rejection vs 3-month protocol	0.686697	1	1	Not Significant
CNP_PAPAN	Rejection vs 3-month protocol	0.685309	0.315152	0.795519	Not Significant
TMEM43_PAPAN	Rejection vs 3-month protocol	0.683927	1	1	Not Significant
CAT_PAPAN	Rejection vs 3-month protocol	0.680636	0.315152	0.795519	Not Significant
VCAN_PAPAN	Rejection vs 3-month protocol	0.670148	0.527273	0.884629	Not Significant
ANXA7_PAPAN	Rejection vs 3-month protocol	0.667992	0.0121212	0.475152	Not Significant
ITLN1_PAPAN	Rejection vs 3-month protocol	0.659617	0.787879	0.942964	Not Significant
RIGI_PAPAN	Rejection vs 3-month protocol	0.657589	0.927273	0.983972	Not Significant
LBP_PAPAN	Rejection vs 3-month protocol	0.657262	0.315152	0.795519	Not Significant
DHRS1_PAPAN	Rejection vs 3-month protocol	0.656548	0.787879	0.942964	Not Significant
FAHD1_PAPAN	Rejection vs 3-month protocol	0.654495	0.527273	0.884629	Not Significant
TCN2_PAPAN	Rejection vs 3-month protocol	0.651656	0.527273	0.884629	Not Significant
SERPINB12_PAPAN	Rejection vs 3-month protocol	0.65059	0.412121	0.83731	Not Significant
COL6A3_PIG	Rejection vs 3-month protocol	0.645102	0.648485	0.929755	Not Significant
CRISPLD2_PAPAN	Rejection vs 3-month protocol	0.643126	0.412121	0.83731	Not Significant
PCK2_PAPAN	Rejection vs 3-month protocol	0.642988	0.412121	0.83731	Not Significant
IL36G_PAPAN	Rejection vs 3-month protocol	0.640944	0.412121	0.83731	Not Significant
RIPOR2_PAPAN	Rejection vs 3-month protocol	0.640928	0.163636	0.706265	Not Significant
METTL7A_PAPAN	Rejection vs 3-month protocol	0.640739	0.527273	0.884629	Not Significant
KPRP_PAPAN	Rejection vs 3-month protocol	0.640473	0.412121	0.83731	Not Significant
FLT1_PAPAN	Rejection vs 3-month protocol	0.632971	0.787879	0.942964	Not Significant
LANCL2_PAPAN	Rejection vs 3-month protocol	0.632797	0.412121	0.83731	Not Significant
HPD_PAPAN	Rejection vs 3-month protocol	0.628513	0.527273	0.884629	Not Significant
AKR7L_PAPAN	Rejection vs 3-month protocol	0.626352	0.412121	0.83731	Not Significant
HUWE1_PAPAN	Rejection vs 3-month protocol	0.625144	0.412121	0.83731	Not Significant
SUB1_PIG	Rejection vs 3-month protocol	0.622802	0.0424242	0.523547	Not Significant
PCYT2_PAPAN	Rejection vs 3-month protocol	0.622452	0.109091	0.660893	Not Significant
NPTN_PAPAN	Rejection vs 3-month protocol	0.619849	0.648485	0.929755	Not Significant
BSG_PAPAN	Rejection vs 3-month protocol	0.619069	0.648485	0.929755	Not Significant
TUT7_PAPAN	Rejection vs 3-month protocol	0.615542	0.230303	0.735028	Not Significant
GDPD3_PAPAN	Rejection vs 3-month protocol	0.61499	0.230303	0.735028	Not Significant
MAN2C1_PAPAN	Rejection vs 3-month protocol	0.611665	0.648485	0.929755	Not Significant
KRT1_PAPAN	Rejection vs 3-month protocol	0.610825	0.230303	0.735028	Not Significant
STEAP4_PAPAN	Rejection vs 3-month protocol	0.606856	0.163636	0.706265	Not Significant
CTSG_PAPAN	Rejection vs 3-month protocol	0.603934	0.648485	0.929755	Not Significant
GDF15_PAPAN	Rejection vs 3-month protocol	0.60189	0.648485	0.929755	Not Significant
CLU_PIG	Rejection vs 3-month protocol	0.601621	0.315152	0.795519	Not Significant
CPNE3_PAPAN	Rejection vs 3-month protocol	0.601309	0.315152	0.795519	Not Significant
MYO18A_PAPAN	Rejection vs 3-month protocol	0.596578	0.0242424	0.475152	Not Significant
ACO1_PAPAN	Rejection vs 3-month protocol	0.595776	0.412121	0.83731	Not Significant
FYCO1_PAPAN	Rejection vs 3-month protocol	0.595014	0.163636	0.706265	Not Significant
IGFBP2_PAPAN	Rejection vs 3-month protocol	0.594291	0.648485	0.929755	Not Significant
ALDH5A1_PAPAN	Rejection vs 3-month protocol	0.59325	0.412121	0.83731	Not Significant
CBR4_PAPAN	Rejection vs 3-month protocol	0.592768	0.648485	0.929755	Not Significant
PRKDC_PAPAN	Rejection vs 3-month protocol	0.590242	0.163636	0.706265	Not Significant
TIMP1_PAPAN	Rejection vs 3-month protocol	0.589453	0.315152	0.795519	Not Significant
PRXL2A_PAPAN	Rejection vs 3-month protocol	0.589323	0.648485	0.929755	Not Significant
CCAR1_PIG	Rejection vs 3-month protocol	0.587681	0.412121	0.83731	Not Significant
FES_PAPAN	Rejection vs 3-month protocol	0.586278	0.163636	0.706265	Not Significant
PARP4_PAPAN	Rejection vs 3-month protocol	0.583639	0.315152	0.795519	Not Significant
MCCC2_PAPAN	Rejection vs 3-month protocol	0.583295	1	1	Not Significant
SCUBE3_PAPAN	Rejection vs 3-month protocol	0.578411	0.315152	0.795519	Not Significant
GSTZ1_PAPAN	Rejection vs 3-month protocol	0.576114	0.412121	0.83731	Not Significant
IGLV11-55_PAPAN	Rejection vs 3-month protocol	0.574209	0.787879	0.942964	Not Significant
P4HA1_PAPAN	Rejection vs 3-month protocol	0.571802	0.527273	0.884629	Not Significant
CTNND1_PAPAN	Rejection vs 3-month protocol	0.570721	0.412121	0.83731	Not Significant
MYH6_PAPAN	Rejection vs 3-month protocol	0.567893	0.527273	0.884629	Not Significant
HDDC2_PAPAN	Rejection vs 3-month protocol	0.567272	0.527273	0.884629	Not Significant
PCOLCE_PAPAN	Rejection vs 3-month protocol	0.564295	0.315152	0.795519	Not Significant
KRT10_PAPAN	Rejection vs 3-month protocol	0.563512	0.230303	0.735028	Not Significant
SCRN2_PAPAN	Rejection vs 3-month protocol	0.559202	0.527273	0.884629	Not Significant
TSG101_PAPAN	Rejection vs 3-month protocol	0.552051	0.163636	0.706265	Not Significant
SRP72_PAPAN	Rejection vs 3-month protocol	0.549861	0.0727273	0.608862	Not Significant
CAPN3_PAPAN	Rejection vs 3-month protocol	0.549683	0.109091	0.660893	Not Significant
EVPL_PIG	Rejection vs 3-month protocol	0.54221	0.787879	0.942964	Not Significant
RABL6_PAPAN	Rejection vs 3-month protocol	0.541398	0.412121	0.83731	Not Significant
RPS6_PIG	Rejection vs 3-month protocol	0.541313	0.527273	0.884629	Not Significant
KLHDC4_PAPAN	Rejection vs 3-month protocol	0.541229	0.787879	0.942964	Not Significant
SCP2_PAPAN	Rejection vs 3-month protocol	0.53826	0.527273	0.884629	Not Significant
GBP3_PAPAN	Rejection vs 3-month protocol	0.538043	0.927273	0.983972	Not Significant
VWCE_PAPAN	Rejection vs 3-month protocol	0.537727	0.230303	0.735028	Not Significant
TRIM25_PAPAN	Rejection vs 3-month protocol	0.536621	0.412121	0.83731	Not Significant
GATM_PAPAN	Rejection vs 3-month protocol	0.536553	0.412121	0.83731	Not Significant
MYBPC2_PAPAN	Rejection vs 3-month protocol	0.532965	0.648485	0.929755	Not Significant
GOT1_PIG	Rejection vs 3-month protocol	0.531964	0.230303	0.735028	Not Significant
PACSIN2_PAPAN	Rejection vs 3-month protocol	0.531091	0.163636	0.706265	Not Significant
SMOC1_PAPAN	Rejection vs 3-month protocol	0.530722	0.927273	0.983972	Not Significant
HELZ2_PAPAN	Rejection vs 3-month protocol	0.529445	0.412121	0.83731	Not Significant
DKK2_PAPAN	Rejection vs 3-month protocol	0.526158	0.787879	0.942964	Not Significant
CS_PAPAN	Rejection vs 3-month protocol	0.52362	0.315152	0.795519	Not Significant
PTPN23_PAPAN	Rejection vs 3-month protocol	0.520322	0.527273	0.884629	Not Significant
ALDH1A1_PAPAN	Rejection vs 3-month protocol	0.518433	0.412121	0.83731	Not Significant
LONP1_PAPAN	Rejection vs 3-month protocol	0.51811	0.527273	0.884629	Not Significant
IPO4_PAPAN	Rejection vs 3-month protocol	0.517258	0.648485	0.929755	Not Significant
LDHB_PIG	Rejection vs 3-month protocol	0.509312	0.412121	0.83731	Not Significant
PLAA_PAPAN	Rejection vs 3-month protocol	0.50714	0.230303	0.735028	Not Significant
COL1A1_PAPAN	Rejection vs 3-month protocol	0.506037	0.315152	0.795519	Not Significant
PIK3R4_PAPAN	Rejection vs 3-month protocol	0.505724	0.315152	0.795519	Not Significant
PPP1CC_PIG	Rejection vs 3-month protocol	0.503185	0.412121	0.83731	Not Significant
ALDH3A2_PAPAN	Rejection vs 3-month protocol	0.500895	0.315152	0.795519	Not Significant
GP5_PAPAN	Rejection vs 3-month protocol	0.500781	0.315152	0.795519	Not Significant
SLIT2_PAPAN	Rejection vs 3-month protocol	0.500083	1	1	Not Significant
ETFB_PAPAN	Rejection vs 3-month protocol	0.499043	0.527273	0.884629	Not Significant
EPX_PAPAN	Rejection vs 3-month protocol	0.495831	0.412121	0.83731	Not Significant
SLC33A1_PAPAN	Rejection vs 3-month protocol	0.495002	0.109091	0.660893	Not Significant
CYP17A1_PAPAN	Rejection vs 3-month protocol	0.492628	0.527273	0.884629	Not Significant
ECI2_PAPAN	Rejection vs 3-month protocol	0.492365	0.230303	0.735028	Not Significant
SCUBE1_PAPAN	Rejection vs 3-month protocol	0.490739	0.927273	0.983972	Not Significant
COPS3_PIG	Rejection vs 3-month protocol	0.485421	0.230303	0.735028	Not Significant
SEC14L2_PAPAN	Rejection vs 3-month protocol	0.485066	0.412121	0.83731	Not Significant
SCFD1_PAPAN	Rejection vs 3-month protocol	0.483397	0.527273	0.884629	Not Significant
WDR44_PAPAN	Rejection vs 3-month protocol	0.482329	0.527273	0.884629	Not Significant
LAMB3_PAPAN	Rejection vs 3-month protocol	0.480436	0.527273	0.884629	Not Significant
OAS2_PAPAN	Rejection vs 3-month protocol	0.478388	0.527273	0.884629	Not Significant
NSFL1C_PAPAN	Rejection vs 3-month protocol	0.477819	0.648485	0.929755	Not Significant
CKMT1B_PAPAN	Rejection vs 3-month protocol	0.474986	0.315152	0.795519	Not Significant
PRPS1_PIG	Rejection vs 3-month protocol	0.474964	0.787879	0.942964	Not Significant
PLXNA1_PAPAN	Rejection vs 3-month protocol	0.474475	0.412121	0.83731	Not Significant
ASL_PAPAN	Rejection vs 3-month protocol	0.47384	0.412121	0.83731	Not Significant
IMPA1_PAPAN	Rejection vs 3-month protocol	0.466254	0.527273	0.884629	Not Significant
AIFM1_PAPAN	Rejection vs 3-month protocol	0.466122	0.412121	0.83731	Not Significant
GBA1_PAPAN	Rejection vs 3-month protocol	0.462915	0.412121	0.83731	Not Significant
HIP1R_PIG	Rejection vs 3-month protocol	0.462498	0.315152	0.795519	Not Significant
JUP_PAPAN	Rejection vs 3-month protocol	0.458962	0.648485	0.929755	Not Significant
ANGPTL3_PAPAN	Rejection vs 3-month protocol	0.458538	0.412121	0.83731	Not Significant
CLEC5A_PAPAN	Rejection vs 3-month protocol	0.455972	0.163636	0.706265	Not Significant
COL5A3_PAPAN	Rejection vs 3-month protocol	0.455809	0.927273	0.983972	Not Significant
NEMF_PAPAN	Rejection vs 3-month protocol	0.453976	0.648485	0.929755	Not Significant
HYOU1_PAPAN	Rejection vs 3-month protocol	0.45331	0.315152	0.795519	Not Significant
SLC44A1_PAPAN	Rejection vs 3-month protocol	0.452654	0.163636	0.706265	Not Significant
RPS10_PIG	Rejection vs 3-month protocol	0.448733	0.109091	0.660893	Not Significant
SCPEP1_PAPAN	Rejection vs 3-month protocol	0.446315	0.0727273	0.608862	Not Significant
SKAP2_PAPAN	Rejection vs 3-month protocol	0.445942	0.230303	0.735028	Not Significant
MCF2L_PAPAN	Rejection vs 3-month protocol	0.445739	0.787879	0.942964	Not Significant
UFL1_PAPAN	Rejection vs 3-month protocol	0.441279	0.315152	0.795519	Not Significant
TFPI_PAPAN	Rejection vs 3-month protocol	0.440386	0.927273	0.983972	Not Significant
NBEAL2_PAPAN	Rejection vs 3-month protocol	0.439487	0.787879	0.942964	Not Significant
ADH6_PAPAN	Rejection vs 3-month protocol	0.438965	0.527273	0.884629	Not Significant
TREX2_PAPAN	Rejection vs 3-month protocol	0.437932	0.315152	0.795519	Not Significant
TNKS1BP1_PAPAN	Rejection vs 3-month protocol	0.435107	0.412121	0.83731	Not Significant
SPTAN1_PAPAN	Rejection vs 3-month protocol	0.434607	0.648485	0.929755	Not Significant
S100P_PAPAN	Rejection vs 3-month protocol	0.434173	0.787879	0.942964	Not Significant
GSTK1_PAPAN	Rejection vs 3-month protocol	0.434087	0.163636	0.706265	Not Significant
CYFIP1_PAPAN	Rejection vs 3-month protocol	0.433733	0.163636	0.706265	Not Significant
NUP205_PAPAN	Rejection vs 3-month protocol	0.433048	0.648485	0.929755	Not Significant
LYN_PAPAN	Rejection vs 3-month protocol	0.432247	0.0121212	0.475152	Not Significant
COX7A2L_PAPAN	Rejection vs 3-month protocol	0.429932	0.109091	0.660893	Not Significant
FN1_PIG	Rejection vs 3-month protocol	0.429335	0.787879	0.942964	Not Significant
SOD3_PAPAN	Rejection vs 3-month protocol	0.429289	0.315152	0.795519	Not Significant
ALDH1A3_PAPAN	Rejection vs 3-month protocol	0.426422	0.787879	0.942964	Not Significant
YARS1_PAPAN	Rejection vs 3-month protocol	0.426036	0.230303	0.735028	Not Significant
TBC1D15_PAPAN	Rejection vs 3-month protocol	0.425947	0.315152	0.795519	Not Significant
FDPS_PAPAN	Rejection vs 3-month protocol	0.423501	0.927273	0.983972	Not Significant
AGRN_PAPAN	Rejection vs 3-month protocol	0.421436	0.0242424	0.475152	Not Significant
MARCKS_PAPAN	Rejection vs 3-month protocol	0.421405	0.787879	0.942964	Not Significant
CPB2_PIG	Rejection vs 3-month protocol	0.419303	0.648485	0.929755	Not Significant
COPS8_PAPAN	Rejection vs 3-month protocol	0.41901	0.163636	0.706265	Not Significant
PSMB9_PAPAN	Rejection vs 3-month protocol	0.417129	0.412121	0.83731	Not Significant
RPL12_PIG	Rejection vs 3-month protocol	0.41634	0.787879	0.942964	Not Significant
PTBP1_PIG	Rejection vs 3-month protocol	0.414673	0.527273	0.884629	Not Significant
NIBAN2_PAPAN	Rejection vs 3-month protocol	0.414545	0.412121	0.83731	Not Significant
BID_PAPAN	Rejection vs 3-month protocol	0.410574	0.230303	0.735028	Not Significant
APOB_PIG	Rejection vs 3-month protocol	0.409805	0.315152	0.795519	Not Significant
TM9SF2_PAPAN	Rejection vs 3-month protocol	0.405438	0.315152	0.795519	Not Significant
UBAP2L_PIG	Rejection vs 3-month protocol	0.404967	0.527273	0.884629	Not Significant
MYOM3_PAPAN	Rejection vs 3-month protocol	0.40183	0.648485	0.929755	Not Significant
RASAL3_PAPAN	Rejection vs 3-month protocol	0.399629	0.315152	0.795519	Not Significant
NOLC1_PAPAN	Rejection vs 3-month protocol	0.39938	0.648485	0.929755	Not Significant
TOR4A_PAPAN	Rejection vs 3-month protocol	0.398944	0.648485	0.929755	Not Significant
ANXA8_PIG	Rejection vs 3-month protocol	0.398812	0.648485	0.929755	Not Significant
TBXAS1_PAPAN	Rejection vs 3-month protocol	0.396256	0.412121	0.83731	Not Significant
HADH_PAPAN	Rejection vs 3-month protocol	0.393631	0.527273	0.884629	Not Significant
ALB_PIG	Rejection vs 3-month protocol	0.392503	0.648485	0.929755	Not Significant
MYO1E_PIG	Rejection vs 3-month protocol	0.389543	0.163636	0.706265	Not Significant
SERPINA3-2_PIG	Rejection vs 3-month protocol	0.387516	0.787879	0.942964	Not Significant
C1QB_PIG	Rejection vs 3-month protocol	0.382615	0.412121	0.83731	Not Significant
MTHFD1_PIG	Rejection vs 3-month protocol	0.380418	0.0727273	0.608862	Not Significant
FYB1_PAPAN	Rejection vs 3-month protocol	0.379735	0.315152	0.795519	Not Significant
CDC42BPB_PAPAN	Rejection vs 3-month protocol	0.377223	0.648485	0.929755	Not Significant
SERPINB2_PIG	Rejection vs 3-month protocol	0.376996	0.527273	0.884629	Not Significant
DPYSL2_PAPAN	Rejection vs 3-month protocol	0.376766	0.927273	0.983972	Not Significant
GLRX3_PAPAN	Rejection vs 3-month protocol	0.375385	1	1	Not Significant
TEX264_PAPAN	Rejection vs 3-month protocol	0.375172	0.315152	0.795519	Not Significant
CFD_PIG	Rejection vs 3-month protocol	0.374365	0.412121	0.83731	Not Significant
ANO6_PAPAN	Rejection vs 3-month protocol	0.36978	0.648485	0.929755	Not Significant
ARPC1B_PAPAN	Rejection vs 3-month protocol	0.36967	0.163636	0.706265	Not Significant
ILF2_PIG	Rejection vs 3-month protocol	0.369113	0.648485	0.929755	Not Significant
PAICS_PAPAN	Rejection vs 3-month protocol	0.368977	0.315152	0.795519	Not Significant
TMED9_PIG	Rejection vs 3-month protocol	0.36858	0.412121	0.83731	Not Significant
ENO1_PAPAN	Rejection vs 3-month protocol	0.367932	0.315152	0.795519	Not Significant
LNPEP_PAPAN	Rejection vs 3-month protocol	0.366387	0.927273	0.983972	Not Significant
TNNI2_PIG	Rejection vs 3-month protocol	0.365058	0.648485	0.929755	Not Significant
TNFRSF6B_PAPAN	Rejection vs 3-month protocol	0.36265	0.315152	0.795519	Not Significant
ARG1_PAPAN	Rejection vs 3-month protocol	0.360742	0.527273	0.884629	Not Significant
STXBP3_PAPAN	Rejection vs 3-month protocol	0.360639	1	1	Not Significant
TSPAN33_PAPAN	Rejection vs 3-month protocol	0.354505	0.648485	0.929755	Not Significant
PYM1_PAPAN	Rejection vs 3-month protocol	0.354341	0.163636	0.706265	Not Significant
GZMB_PAPAN	Rejection vs 3-month protocol	0.352408	0.412121	0.83731	Not Significant
PCOLCE_PIG	Rejection vs 3-month protocol	0.352338	0.648485	0.929755	Not Significant
RNF126_PIG	Rejection vs 3-month protocol	0.351614	0.527273	0.884629	Not Significant
HLA-DPA1_PAPAN	Rejection vs 3-month protocol	0.351	0.527273	0.884629	Not Significant
CHI3L1_PAPAN	Rejection vs 3-month protocol	0.348559	0.787879	0.942964	Not Significant
APOA4_PIG	Rejection vs 3-month protocol	0.346662	0.648485	0.929755	Not Significant
AGT_PAPAN	Rejection vs 3-month protocol	0.345502	0.648485	0.929755	Not Significant
BCAP31_PAPAN	Rejection vs 3-month protocol	0.344559	0.527273	0.884629	Not Significant
ETFDH_PAPAN	Rejection vs 3-month protocol	0.34433	0.787879	0.942964	Not Significant
VSIG8_PAPAN	Rejection vs 3-month protocol	0.342242	0.315152	0.795519	Not Significant
FGFBP1_PAPAN	Rejection vs 3-month protocol	0.341748	0.927273	0.983972	Not Significant
HSD17B4_PAPAN	Rejection vs 3-month protocol	0.340738	0.163636	0.706265	Not Significant
ARF5_PIG	Rejection vs 3-month protocol	0.337949	0.315152	0.795519	Not Significant
TAP2_PAPAN	Rejection vs 3-month protocol	0.337877	1	1	Not Significant
APOE_PAPAN	Rejection vs 3-month protocol	0.336687	0.412121	0.83731	Not Significant
NT5C_PAPAN	Rejection vs 3-month protocol	0.335461	0.787879	0.942964	Not Significant
CKM_PAPAN	Rejection vs 3-month protocol	0.331828	0.927273	0.983972	Not Significant
Paca-F_PAPAN	Rejection vs 3-month protocol	0.330572	0.527273	0.884629	Not Significant
APOB_PAPAN	Rejection vs 3-month protocol	0.329797	0.648485	0.929755	Not Significant
NEU2_PAPAN	Rejection vs 3-month protocol	0.328834	0.787879	0.942964	Not Significant
IDH2_PAPAN	Rejection vs 3-month protocol	0.32578	0.787879	0.942964	Not Significant
HSD17B8_PAPAN	Rejection vs 3-month protocol	0.324817	0.527273	0.884629	Not Significant
XRCC5_PAPAN	Rejection vs 3-month protocol	0.324792	0.648485	0.929755	Not Significant
TSPAN9_PAPAN	Rejection vs 3-month protocol	0.323778	0.648485	0.929755	Not Significant
RAB8A_PIG	Rejection vs 3-month protocol	0.323731	0.648485	0.929755	Not Significant
ALDH7A1_PAPAN	Rejection vs 3-month protocol	0.322095	1	1	Not Significant
SVEP1_PIG	Rejection vs 3-month protocol	0.321811	0.648485	0.929755	Not Significant
MPP1_PAPAN	Rejection vs 3-month protocol	0.320392	0.787879	0.942964	Not Significant
MYH9_PIG	Rejection vs 3-month protocol	0.319134	0.412121	0.83731	Not Significant
THSD7A_PAPAN	Rejection vs 3-month protocol	0.319035	0.787879	0.942964	Not Significant
MTAP_PAPAN	Rejection vs 3-month protocol	0.317182	0.315152	0.795519	Not Significant
MDH1_PAPAN	Rejection vs 3-month protocol	0.317031	0.412121	0.83731	Not Significant
MB_PAPAN	Rejection vs 3-month protocol	0.315479	0.927273	0.983972	Not Significant
IL18_PAPAN	Rejection vs 3-month protocol	0.31368	0.787879	0.942964	Not Significant
SNRNP70_PAPAN	Rejection vs 3-month protocol	0.310068	0.412121	0.83731	Not Significant
CLYBL_PAPAN	Rejection vs 3-month protocol	0.308368	1	1	Not Significant
SLC22A16_PAPAN	Rejection vs 3-month protocol	0.30735	0.527273	0.884629	Not Significant
PECR_PAPAN	Rejection vs 3-month protocol	0.305717	0.787879	0.942964	Not Significant
APEH_PAPAN	Rejection vs 3-month protocol	0.303529	0.527273	0.884629	Not Significant
OGDH_PAPAN	Rejection vs 3-month protocol	0.303404	0.648485	0.929755	Not Significant
ENO3_PAPAN	Rejection vs 3-month protocol	0.303162	0.927273	0.983972	Not Significant
ARHGAP6_PAPAN	Rejection vs 3-month protocol	0.301338	0.648485	0.929755	Not Significant
MMP2_PAPAN	Rejection vs 3-month protocol	0.299427	0.412121	0.83731	Not Significant
PRG2_PAPAN	Rejection vs 3-month protocol	0.299251	0.787879	0.942964	Not Significant
MVB12A_PAPAN	Rejection vs 3-month protocol	0.298906	0.648485	0.929755	Not Significant
CAPN5_PAPAN	Rejection vs 3-month protocol	0.298682	0.412121	0.83731	Not Significant
SERPINF1_PIG	Rejection vs 3-month protocol	0.295928	0.315152	0.795519	Not Significant
UMPS_PAPAN	Rejection vs 3-month protocol	0.295163	0.527273	0.884629	Not Significant
RRM1_PAPAN	Rejection vs 3-month protocol	0.29514	0.648485	0.929755	Not Significant
PSME1_PAPAN	Rejection vs 3-month protocol	0.294366	0.527273	0.884629	Not Significant
APOL2_PAPAN	Rejection vs 3-month protocol	0.293828	0.412121	0.83731	Not Significant
EGFLAM_PAPAN	Rejection vs 3-month protocol	0.290266	0.787879	0.942964	Not Significant
FSCN1_PAPAN	Rejection vs 3-month protocol	0.288991	0.527273	0.884629	Not Significant
FKBP4_PAPAN	Rejection vs 3-month protocol	0.286016	0.527273	0.884629	Not Significant
VARS1_PIG	Rejection vs 3-month protocol	0.285348	0.412121	0.83731	Not Significant
ITIH5_PAPAN	Rejection vs 3-month protocol	0.284523	0.230303	0.735028	Not Significant
IFI44_PAPAN	Rejection vs 3-month protocol	0.284272	0.927273	0.983972	Not Significant
AQP1_PAPAN	Rejection vs 3-month protocol	0.283851	0.230303	0.735028	Not Significant
TPR_PAPAN	Rejection vs 3-month protocol	0.282478	0.527273	0.884629	Not Significant
AP2A2_PAPAN	Rejection vs 3-month protocol	0.282058	0.527273	0.884629	Not Significant
CMBL_PAPAN	Rejection vs 3-month protocol	0.281967	1	1	Not Significant
CD38_PAPAN	Rejection vs 3-month protocol	0.28137	0.527273	0.884629	Not Significant
ABI3BP_PAPAN	Rejection vs 3-month protocol	0.281275	1	1	Not Significant
ESYT3_PAPAN	Rejection vs 3-month protocol	0.281157	0.927273	0.983972	Not Significant
DNAJA1_PIG	Rejection vs 3-month protocol	0.279216	0.527273	0.884629	Not Significant
VIM_PAPAN	Rejection vs 3-month protocol	0.27215	0.230303	0.735028	Not Significant
POSTN_PAPAN	Rejection vs 3-month protocol	0.272103	0.527273	0.884629	Not Significant
IDH1_PAPAN	Rejection vs 3-month protocol	0.269204	0.527273	0.884629	Not Significant
TGM1_PAPAN	Rejection vs 3-month protocol	0.269182	0.787879	0.942964	Not Significant
ADH5_PAPAN	Rejection vs 3-month protocol	0.268505	0.527273	0.884629	Not Significant
ACTN2_PAPAN	Rejection vs 3-month protocol	0.266047	0.412121	0.83731	Not Significant
RPL13A_PIG	Rejection vs 3-month protocol	0.265318	0.927273	0.983972	Not Significant
FCN1_PAPAN	Rejection vs 3-month protocol	0.262902	0.648485	0.929755	Not Significant
COL6A1_PIG	Rejection vs 3-month protocol	0.259617	0.527273	0.884629	Not Significant
ANPEP_PAPAN	Rejection vs 3-month protocol	0.259233	0.927273	0.983972	Not Significant
SERPINA11_PAPAN	Rejection vs 3-month protocol	0.2591	0.927273	0.983972	Not Significant
TTYH3_PAPAN	Rejection vs 3-month protocol	0.258899	0.412121	0.83731	Not Significant
EIF5B_PAPAN	Rejection vs 3-month protocol	0.257164	0.412121	0.83731	Not Significant
HSBP1_PIG	Rejection vs 3-month protocol	0.25701	0.927273	0.983972	Not Significant
FAM120A_PAPAN	Rejection vs 3-month protocol	0.253533	0.787879	0.942964	Not Significant
ANXA1_PAPAN	Rejection vs 3-month protocol	0.252319	0.787879	0.942964	Not Significant
SERPING1_PIG	Rejection vs 3-month protocol	0.251224	0.787879	0.942964	Not Significant
PLOD1_PAPAN	Rejection vs 3-month protocol	0.249767	0.527273	0.884629	Not Significant
PML_PAPAN	Rejection vs 3-month protocol	0.247831	0.648485	0.929755	Not Significant
HP1BP3_PAPAN	Rejection vs 3-month protocol	0.246445	0.927273	0.983972	Not Significant
PLA1A_PAPAN	Rejection vs 3-month protocol	0.245166	0.787879	0.942964	Not Significant
GP1BB_PAPAN	Rejection vs 3-month protocol	0.244225	0.927273	0.983972	Not Significant
SDR9C7_PIG	Rejection vs 3-month protocol	0.24087	0.527273	0.884629	Not Significant
ADD2_PAPAN	Rejection vs 3-month protocol	0.237418	0.787879	0.942964	Not Significant
ATP1B1_PAPAN	Rejection vs 3-month protocol	0.235962	0.787879	0.942964	Not Significant
EPB41L2_PAPAN	Rejection vs 3-month protocol	0.234228	0.0242424	0.475152	Not Significant
DTD1_PIG	Rejection vs 3-month protocol	0.233321	0.787879	0.942964	Not Significant
EXOC4_PAPAN	Rejection vs 3-month protocol	0.23024	0.648485	0.929755	Not Significant
EIF3C_PAPAN	Rejection vs 3-month protocol	0.229851	0.648485	0.929755	Not Significant
PYGL_PAPAN	Rejection vs 3-month protocol	0.229748	0.412121	0.83731	Not Significant
CR1L_PAPAN	Rejection vs 3-month protocol	0.228345	0.412121	0.83731	Not Significant
HGS_PAPAN	Rejection vs 3-month protocol	0.228343	0.527273	0.884629	Not Significant
CCN1_PAPAN	Rejection vs 3-month protocol	0.22611	0.927273	0.983972	Not Significant
SLC16A1_PAPAN	Rejection vs 3-month protocol	0.223978	0.787879	0.942964	Not Significant
KALRN_PAPAN	Rejection vs 3-month protocol	0.223188	1	1	Not Significant
B2M_PAPAN	Rejection vs 3-month protocol	0.222046	0.527273	0.884629	Not Significant
HSD17B12_PAPAN	Rejection vs 3-month protocol	0.221596	0.648485	0.929755	Not Significant
TNFSF10_PAPAN	Rejection vs 3-month protocol	0.221439	0.787879	0.942964	Not Significant
IGFBP4_PAPAN	Rejection vs 3-month protocol	0.221228	0.648485	0.929755	Not Significant
ARIH1_PIG	Rejection vs 3-month protocol	0.219116	0.412121	0.83731	Not Significant
CARKD_PAPAN	Rejection vs 3-month protocol	0.218999	0.648485	0.929755	Not Significant
LRPPRC_PIG	Rejection vs 3-month protocol	0.218913	0.927273	0.983972	Not Significant
ACADSB_PAPAN	Rejection vs 3-month protocol	0.217901	0.412121	0.83731	Not Significant
NDRG2_PAPAN	Rejection vs 3-month protocol	0.21668	0.927273	0.983972	Not Significant
STX11_PAPAN	Rejection vs 3-month protocol	0.215271	0.527273	0.884629	Not Significant
EIF3B_PAPAN	Rejection vs 3-month protocol	0.213981	0.527273	0.884629	Not Significant
CCT5_PAPAN	Rejection vs 3-month protocol	0.213905	0.527273	0.884629	Not Significant
MACF1_PIG	Rejection vs 3-month protocol	0.213416	0.648485	0.929755	Not Significant
NT5C3A_PAPAN	Rejection vs 3-month protocol	0.213249	0.787879	0.942964	Not Significant
ITIH4_PIG	Rejection vs 3-month protocol	0.210642	1	1	Not Significant
HBG2_1_PAPAN	Rejection vs 3-month protocol	0.207029	0.787879	0.942964	Not Significant
MAT2B_PAPAN	Rejection vs 3-month protocol	0.206617	0.787879	0.942964	Not Significant
ACOX1_PAPAN	Rejection vs 3-month protocol	0.205805	0.787879	0.942964	Not Significant
CDK5RAP3_PAPAN	Rejection vs 3-month protocol	0.205144	0.648485	0.929755	Not Significant
MYOM1_PAPAN	Rejection vs 3-month protocol	0.204983	0.412121	0.83731	Not Significant
GOLGB1_PAPAN	Rejection vs 3-month protocol	0.201753	0.787879	0.942964	Not Significant
IPO5_PAPAN	Rejection vs 3-month protocol	0.20045	0.230303	0.735028	Not Significant
CYP2A19_PIG	Rejection vs 3-month protocol	0.199945	0.927273	0.983972	Not Significant
SFRP1_PAPAN	Rejection vs 3-month protocol	0.199503	1	1	Not Significant
ZNF185_PAPAN	Rejection vs 3-month protocol	0.198126	0.927273	0.983972	Not Significant
PPA2_PAPAN	Rejection vs 3-month protocol	0.197138	0.787879	0.942964	Not Significant
C2_PIG	Rejection vs 3-month protocol	0.197025	0.648485	0.929755	Not Significant
AIMP2_PAPAN	Rejection vs 3-month protocol	0.196283	0.527273	0.884629	Not Significant
GSTM2_PAPAN	Rejection vs 3-month protocol	0.195436	0.787879	0.942964	Not Significant
CCT8_PAPAN	Rejection vs 3-month protocol	0.194927	0.648485	0.929755	Not Significant
TKT_PAPAN	Rejection vs 3-month protocol	0.193437	0.787879	0.942964	Not Significant
KIF13B_PAPAN	Rejection vs 3-month protocol	0.1904	0.648485	0.929755	Not Significant
SPTBN1_PAPAN	Rejection vs 3-month protocol	0.189615	0.648485	0.929755	Not Significant
VCL_PAPAN	Rejection vs 3-month protocol	0.189385	0.927273	0.983972	Not Significant
DMKN_PAPAN	Rejection vs 3-month protocol	0.188049	0.787879	0.942964	Not Significant
SEC11A_PIG	Rejection vs 3-month protocol	0.187731	0.527273	0.884629	Not Significant
DMP1_PAPAN	Rejection vs 3-month protocol	0.184014	0.787879	0.942964	Not Significant
MYOF_PAPAN	Rejection vs 3-month protocol	0.183516	0.787879	0.942964	Not Significant
STAT1_PAPAN	Rejection vs 3-month protocol	0.182986	0.230303	0.735028	Not Significant
DARS1_PAPAN	Rejection vs 3-month protocol	0.182403	0.648485	0.929755	Not Significant
ME1_PIG	Rejection vs 3-month protocol	0.18205	0.927273	0.983972	Not Significant
QSOX1_PIG	Rejection vs 3-month protocol	0.180814	0.412121	0.83731	Not Significant
THRAP3_PAPAN	Rejection vs 3-month protocol	0.180678	0.648485	0.929755	Not Significant
VSIG4_PAPAN	Rejection vs 3-month protocol	0.179793	1	1	Not Significant
UBE2N_PAPAN	Rejection vs 3-month protocol	0.179466	0.927273	0.983972	Not Significant
HBB_PIG	Rejection vs 3-month protocol	0.177206	0.927273	0.983972	Not Significant
DPYSL3_PAPAN	Rejection vs 3-month protocol	0.176817	1	1	Not Significant
UNC13D_PAPAN	Rejection vs 3-month protocol	0.175821	1	1	Not Significant
MCCC1_PAPAN	Rejection vs 3-month protocol	0.175656	0.527273	0.884629	Not Significant
RRBP1_PAPAN	Rejection vs 3-month protocol	0.175136	0.648485	0.929755	Not Significant
ANKRD2_PAPAN	Rejection vs 3-month protocol	0.17386	0.927273	0.983972	Not Significant
IL6R_PAPAN	Rejection vs 3-month protocol	0.173852	0.927273	0.983972	Not Significant
HCFC1_PIG	Rejection vs 3-month protocol	0.173646	0.787879	0.942964	Not Significant
GDI2_PAPAN	Rejection vs 3-month protocol	0.171923	0.787879	0.942964	Not Significant
SCARB2_PAPAN	Rejection vs 3-month protocol	0.171541	0.527273	0.884629	Not Significant
PIPOX_PAPAN	Rejection vs 3-month protocol	0.167135	0.927273	0.983972	Not Significant
PRG4_PIG	Rejection vs 3-month protocol	0.165862	0.927273	0.983972	Not Significant
PLCG2_PAPAN	Rejection vs 3-month protocol	0.165726	0.412121	0.83731	Not Significant
CMPK1_PAPAN	Rejection vs 3-month protocol	0.165283	0.648485	0.929755	Not Significant
MYO9B_PAPAN	Rejection vs 3-month protocol	0.161906	0.412121	0.83731	Not Significant
COL6A2_PAPAN	Rejection vs 3-month protocol	0.161496	0.412121	0.83731	Not Significant
RPN1_PAPAN	Rejection vs 3-month protocol	0.16009	0.787879	0.942964	Not Significant
PLBD1_PAPAN	Rejection vs 3-month protocol	0.159809	0.412121	0.83731	Not Significant
PIGR_PAPAN	Rejection vs 3-month protocol	0.158157	0.648485	0.929755	Not Significant
HOOK1_PAPAN	Rejection vs 3-month protocol	0.152681	0.412121	0.83731	Not Significant
ITGA7_PAPAN	Rejection vs 3-month protocol	0.150285	0.787879	0.942964	Not Significant
FBN1_PIG	Rejection vs 3-month protocol	0.14948	0.927273	0.983972	Not Significant
APIP_PAPAN	Rejection vs 3-month protocol	0.149454	0.787879	0.942964	Not Significant
AOC1_PAPAN	Rejection vs 3-month protocol	0.14345	0.927273	0.983972	Not Significant
RPL10A_PIG	Rejection vs 3-month protocol	0.142448	0.927273	0.983972	Not Significant
CTPS1_PAPAN	Rejection vs 3-month protocol	0.142046	0.787879	0.942964	Not Significant
RPS25_PIG	Rejection vs 3-month protocol	0.141661	0.648485	0.929755	Not Significant
GALK1_PAPAN	Rejection vs 3-month protocol	0.141085	0.787879	0.942964	Not Significant
SCIN_PAPAN	Rejection vs 3-month protocol	0.140314	0.787879	0.942964	Not Significant
SQOR_PIG	Rejection vs 3-month protocol	0.140243	0.315152	0.795519	Not Significant
DSC1_PAPAN	Rejection vs 3-month protocol	0.138418	0.787879	0.942964	Not Significant
GMPR_PAPAN	Rejection vs 3-month protocol	0.138287	1	1	Not Significant
ITGB2_PAPAN	Rejection vs 3-month protocol	0.13614	0.787879	0.942964	Not Significant
TCOF1_PAPAN	Rejection vs 3-month protocol	0.133178	1	1	Not Significant
XYLT1_PIG	Rejection vs 3-month protocol	0.133098	0.787879	0.942964	Not Significant
NT5DC1_PAPAN	Rejection vs 3-month protocol	0.132386	0.787879	0.942964	Not Significant
TJP2_PAPAN	Rejection vs 3-month protocol	0.131588	1	1	Not Significant
HMGCS2_PAPAN	Rejection vs 3-month protocol	0.131567	0.787879	0.942964	Not Significant
MYO1F_PAPAN	Rejection vs 3-month protocol	0.131396	0.787879	0.942964	Not Significant
RPL7A_PIG	Rejection vs 3-month protocol	0.129219	1	1	Not Significant
LTB4R_PAPAN	Rejection vs 3-month protocol	0.129025	0.787879	0.942964	Not Significant
ADAMTSL2_PAPAN	Rejection vs 3-month protocol	0.124796	0.787879	0.942964	Not Significant
STC1_PAPAN	Rejection vs 3-month protocol	0.124792	0.927273	0.983972	Not Significant
CA2_PAPAN	Rejection vs 3-month protocol	0.124528	1	1	Not Significant
ACE2_PAPAN	Rejection vs 3-month protocol	0.123348	1	1	Not Significant
H6PD_PAPAN	Rejection vs 3-month protocol	0.121723	0.787879	0.942964	Not Significant
NAGK_PAPAN	Rejection vs 3-month protocol	0.12141	0.648485	0.929755	Not Significant
ABHD10_PAPAN	Rejection vs 3-month protocol	0.12008	1	1	Not Significant
DNPEP_PAPAN	Rejection vs 3-month protocol	0.119975	0.648485	0.929755	Not Significant
SRP68_PAPAN	Rejection vs 3-month protocol	0.119027	1	1	Not Significant
EHHADH_PAPAN	Rejection vs 3-month protocol	0.118384	0.787879	0.942964	Not Significant
CORO1A_PAPAN	Rejection vs 3-month protocol	0.111374	0.787879	0.942964	Not Significant
IFIT3_PAPAN	Rejection vs 3-month protocol	0.108932	0.927273	0.983972	Not Significant
SHMT1_PAPAN	Rejection vs 3-month protocol	0.108744	0.927273	0.983972	Not Significant
PECAM1_PAPAN	Rejection vs 3-month protocol	0.10793	0.315152	0.795519	Not Significant
CCT2_PAPAN	Rejection vs 3-month protocol	0.105657	0.787879	0.942964	Not Significant
GLA_PAPAN	Rejection vs 3-month protocol	0.104835	0.648485	0.929755	Not Significant
SEMA4D_PAPAN	Rejection vs 3-month protocol	0.103299	0.787879	0.942964	Not Significant
C7_PIG	Rejection vs 3-month protocol	0.102519	0.927273	0.983972	Not Significant
SSB_PIG	Rejection vs 3-month protocol	0.102402	0.927273	0.983972	Not Significant
OTC_PAPAN	Rejection vs 3-month protocol	0.10047	0.927273	0.983972	Not Significant
CA1_PAPAN	Rejection vs 3-month protocol	0.0988515	0.787879	0.942964	Not Significant
PSMD3_PAPAN	Rejection vs 3-month protocol	0.0985387	0.648485	0.929755	Not Significant
ITGA2B_PAPAN	Rejection vs 3-month protocol	0.0981005	1	1	Not Significant
BUB3_PIG	Rejection vs 3-month protocol	0.0981003	0.927273	0.983972	Not Significant
S100A16_PAPAN	Rejection vs 3-month protocol	0.0976574	1	1	Not Significant
RPL34_PIG	Rejection vs 3-month protocol	0.0966258	0.787879	0.942964	Not Significant
LUM_PIG	Rejection vs 3-month protocol	0.0956759	0.527273	0.884629	Not Significant
ATP5F1C_PAPAN	Rejection vs 3-month protocol	0.095613	0.787879	0.942964	Not Significant
LAMP1_PAPAN	Rejection vs 3-month protocol	0.0955588	0.787879	0.942964	Not Significant
POR_PAPAN	Rejection vs 3-month protocol	0.0945683	0.927273	0.983972	Not Significant
CLEC14A_PAPAN	Rejection vs 3-month protocol	0.0937162	0.648485	0.929755	Not Significant
PPP5C_PAPAN	Rejection vs 3-month protocol	0.0933152	0.787879	0.942964	Not Significant
OIT3_PAPAN	Rejection vs 3-month protocol	0.0931931	0.648485	0.929755	Not Significant
CRP_PAPAN	Rejection vs 3-month protocol	0.0930637	0.927273	0.983972	Not Significant
COPZ1_PIG	Rejection vs 3-month protocol	0.0927631	1	1	Not Significant
EPB42_PAPAN	Rejection vs 3-month protocol	0.0895122	0.787879	0.942964	Not Significant
RPS17_PIG	Rejection vs 3-month protocol	0.089511	0.927273	0.983972	Not Significant
IQGAP1_PIG	Rejection vs 3-month protocol	0.0890734	0.787879	0.942964	Not Significant
PKLR_PAPAN	Rejection vs 3-month protocol	0.0879572	0.787879	0.942964	Not Significant
PLAT_PAPAN	Rejection vs 3-month protocol	0.0879436	0.787879	0.942964	Not Significant
THBS4_PIG	Rejection vs 3-month protocol	0.0872218	0.927273	0.983972	Not Significant
GLYAT_PAPAN	Rejection vs 3-month protocol	0.0868883	0.927273	0.983972	Not Significant
RDH11_PAPAN	Rejection vs 3-month protocol	0.0867688	0.927273	0.983972	Not Significant
SEMA4G_PAPAN	Rejection vs 3-month protocol	0.0848798	0.412121	0.83731	Not Significant
EPRS1_PAPAN	Rejection vs 3-month protocol	0.0841978	0.527273	0.884629	Not Significant
ADAMTSL4_PAPAN	Rejection vs 3-month protocol	0.0833508	1	1	Not Significant
ERP29_PAPAN	Rejection vs 3-month protocol	0.0829005	0.412121	0.83731	Not Significant
MYH10_PAPAN	Rejection vs 3-month protocol	0.0821262	0.787879	0.942964	Not Significant
TSPAN32_PAPAN	Rejection vs 3-month protocol	0.0813801	0.927273	0.983972	Not Significant
YWHAZ_PIG	Rejection vs 3-month protocol	0.0801851	0.927273	0.983972	Not Significant
A2ML1_PAPAN	Rejection vs 3-month protocol	0.0796539	0.927273	0.983972	Not Significant
PEBP4_PAPAN	Rejection vs 3-month protocol	0.078906	0.527273	0.884629	Not Significant
BHMT_PAPAN	Rejection vs 3-month protocol	0.0761815	0.927273	0.983972	Not Significant
NEO1_PAPAN	Rejection vs 3-month protocol	0.0755774	0.787879	0.942964	Not Significant
PCK1_PAPAN	Rejection vs 3-month protocol	0.0750851	0.927273	0.983972	Not Significant
SERPINA12_PAPAN	Rejection vs 3-month protocol	0.0707272	0.927273	0.983972	Not Significant
NUP155_PAPAN	Rejection vs 3-month protocol	0.0706043	0.787879	0.942964	Not Significant
TNRC6B_PAPAN	Rejection vs 3-month protocol	0.0689607	0.927273	0.983972	Not Significant
ANTXR1_PAPAN	Rejection vs 3-month protocol	0.0682152	0.787879	0.942964	Not Significant
PRDX5_PAPAN	Rejection vs 3-month protocol	0.0672288	0.927273	0.983972	Not Significant
ETFA_PAPAN	Rejection vs 3-month protocol	0.0668125	0.527273	0.884629	Not Significant
NCL_PAPAN	Rejection vs 3-month protocol	0.0665996	1	1	Not Significant
NID1_PAPAN	Rejection vs 3-month protocol	0.066144	0.648485	0.929755	Not Significant
BAAT_PAPAN	Rejection vs 3-month protocol	0.0652626	1	1	Not Significant
COPB1_PAPAN	Rejection vs 3-month protocol	0.0649145	0.787879	0.942964	Not Significant
ENDOD1_PAPAN	Rejection vs 3-month protocol	0.0641271	1	1	Not Significant
CYP8B1_PAPAN	Rejection vs 3-month protocol	0.0639646	1	1	Not Significant
G6PD_PIG	Rejection vs 3-month protocol	0.0636389	0.927273	0.983972	Not Significant
LGALS3BP_PIG	Rejection vs 3-month protocol	0.0629076	0.927273	0.983972	Not Significant
SEMA7A_PAPAN	Rejection vs 3-month protocol	0.0628755	0.927273	0.983972	Not Significant
GLO1_PAPAN	Rejection vs 3-month protocol	0.0602635	1	1	Not Significant
RPS20_PIG	Rejection vs 3-month protocol	0.0583111	0.927273	0.983972	Not Significant
RPL14_PIG	Rejection vs 3-month protocol	0.0569147	0.787879	0.942964	Not Significant
GGCT_PAPAN	Rejection vs 3-month protocol	0.0559135	1	1	Not Significant
SEMA4A_PAPAN	Rejection vs 3-month protocol	0.0548423	1	1	Not Significant
MADD_PIG	Rejection vs 3-month protocol	0.0544838	1	1	Not Significant
PEBP1_PAPAN	Rejection vs 3-month protocol	0.0541615	0.648485	0.929755	Not Significant
FH_PAPAN	Rejection vs 3-month protocol	0.054092	0.787879	0.942964	Not Significant
IGLV3-9_PAPAN	Rejection vs 3-month protocol	0.0520264	0.787879	0.942964	Not Significant
TSNAX_PAPAN	Rejection vs 3-month protocol	0.0517598	0.927273	0.983972	Not Significant
PDIA4_PAPAN	Rejection vs 3-month protocol	0.051164	1	1	Not Significant
BLVRB_PAPAN	Rejection vs 3-month protocol	0.0488038	0.927273	0.983972	Not Significant
MPO_PAPAN	Rejection vs 3-month protocol	0.0485087	0.787879	0.942964	Not Significant
ABHD16A_PIG	Rejection vs 3-month protocol	0.0483971	0.927273	0.983972	Not Significant
ALDH2_PAPAN	Rejection vs 3-month protocol	0.0470571	0.927273	0.983972	Not Significant
RPS19_PIG	Rejection vs 3-month protocol	0.0454436	0.412121	0.83731	Not Significant
CKAP4_PAPAN	Rejection vs 3-month protocol	0.0437183	0.648485	0.929755	Not Significant
FCN3_PAPAN	Rejection vs 3-month protocol	0.0435911	0.787879	0.942964	Not Significant
NPEPL1_PAPAN	Rejection vs 3-month protocol	0.0432101	1	1	Not Significant
LSS_PAPAN	Rejection vs 3-month protocol	0.0428059	0.527273	0.884629	Not Significant
GARS1_PAPAN	Rejection vs 3-month protocol	0.0427442	0.787879	0.942964	Not Significant
PKP3_PIG	Rejection vs 3-month protocol	0.0398651	0.927273	0.983972	Not Significant
HMGCL_PAPAN	Rejection vs 3-month protocol	0.0375467	0.787879	0.942964	Not Significant
ITIH1_PIG	Rejection vs 3-month protocol	0.0375398	0.787879	0.942964	Not Significant
LCP1_PAPAN	Rejection vs 3-month protocol	0.0361695	1	1	Not Significant
CYBB_PAPAN	Rejection vs 3-month protocol	0.0353919	0.927273	0.983972	Not Significant
ITGAL_PAPAN	Rejection vs 3-month protocol	0.0344694	0.527273	0.884629	Not Significant
RNF213_PAPAN	Rejection vs 3-month protocol	0.0328302	1	1	Not Significant
COL18A1_PIG	Rejection vs 3-month protocol	0.0322772	0.927273	0.983972	Not Significant
C1QA_PAPAN	Rejection vs 3-month protocol	0.0310656	0.527273	0.884629	Not Significant
MVP_PAPAN	Rejection vs 3-month protocol	0.0291382	0.787879	0.942964	Not Significant
ITGA11_PAPAN	Rejection vs 3-month protocol	0.0290106	1	1	Not Significant
S100A3_PAPAN	Rejection vs 3-month protocol	0.0282508	0.927273	0.983972	Not Significant
HMGB2_PIG	Rejection vs 3-month protocol	0.0281543	1	1	Not Significant
SERPINB5_PAPAN	Rejection vs 3-month protocol	0.0280092	0.787879	0.942964	Not Significant
ITGB1_PAPAN	Rejection vs 3-month protocol	0.0277877	1	1	Not Significant
UROC1_PAPAN	Rejection vs 3-month protocol	0.027659	0.927273	0.983972	Not Significant
SHTN1_PAPAN	Rejection vs 3-month protocol	0.024267	1	1	Not Significant
ROCK2_PAPAN	Rejection vs 3-month protocol	0.0234529	1	1	Not Significant
EEA1_PAPAN	Rejection vs 3-month protocol	0.0233311	0.927273	0.983972	Not Significant
STAP2_PIG	Rejection vs 3-month protocol	0.0210646	0.787879	0.942964	Not Significant
PRDX6_PAPAN	Rejection vs 3-month protocol	0.0209061	0.927273	0.983972	Not Significant
RPL7_PIG	Rejection vs 3-month protocol	0.0199933	0.648485	0.929755	Not Significant
CLEC12A_PAPAN	Rejection vs 3-month protocol	0.014437	0.927273	0.983972	Not Significant
MAN2A1_PAPAN	Rejection vs 3-month protocol	0.0141523	1	1	Not Significant
GBE1_PAPAN	Rejection vs 3-month protocol	0.0140362	0.927273	0.983972	Not Significant
SYPL1_PAPAN	Rejection vs 3-month protocol	0.0138532	0.927273	0.983972	Not Significant
LAMA2_PAPAN	Rejection vs 3-month protocol	0.013782	0.787879	0.942964	Not Significant
LARS1_PAPAN	Rejection vs 3-month protocol	0.0129076	1	1	Not Significant
PRDX2_PAPAN	Rejection vs 3-month protocol	0.011799	0.787879	0.942964	Not Significant
PTPRF_PIG	Rejection vs 3-month protocol	0.0117845	0.927273	0.983972	Not Significant
NRGN_PAPAN	Rejection vs 3-month protocol	0.0108587	1	1	Not Significant
GRN_PAPAN	Rejection vs 3-month protocol	0.00950511	0.787879	0.942964	Not Significant
PTPN1_PAPAN	Rejection vs 3-month protocol	0.00887875	0.648485	0.929755	Not Significant
SNED1_PAPAN	Rejection vs 3-month protocol	0.00885921	0.927273	0.983972	Not Significant
HAPLN3_PAPAN	Rejection vs 3-month protocol	0.00753324	0.787879	0.942964	Not Significant
SPTA1_PAPAN	Rejection vs 3-month protocol	0.0061612	1	1	Not Significant
SLC44A2_PAPAN	Rejection vs 3-month protocol	0.00611252	0.927273	0.983972	Not Significant
SPRR1B_PAPAN	Rejection vs 3-month protocol	0.00507946	1	1	Not Significant
NUDT5_PAPAN	Rejection vs 3-month protocol	0.00391708	0.927273	0.983972	Not Significant
HSPE1_PIG	Rejection vs 3-month protocol	0.00337439	0.927273	0.983972	Not Significant
C3_PIG	Rejection vs 3-month protocol	0.00319561	0.927273	0.983972	Not Significant
ACIN1_PAPAN	Rejection vs 3-month protocol	0.0024191	0.927273	0.983972	Not Significant
ITGB3_PAPAN	Rejection vs 3-month protocol	0.00176632	0.787879	0.942964	Not Significant
PDGFD_PAPAN	Rejection vs 3-month protocol	0.00170695	0.648485	0.929755	Not Significant
PXDN_PAPAN	Rejection vs 3-month protocol	0.00113314	0.927273	0.983972	Not Significant
HOGA1_PAPAN	Rejection vs 3-month protocol	-0.000998421	0.787879	0.942964	Not Significant
NAPRT_PAPAN	Rejection vs 3-month protocol	-0.00128176	1	1	Not Significant
C1S_PIG	Rejection vs 3-month protocol	-0.00171595	0.787879	0.942964	Not Significant
IFIT5_PAPAN	Rejection vs 3-month protocol	-0.00256092	1	1	Not Significant
ARHGAP1_PAPAN	Rejection vs 3-month protocol	-0.00297076	0.927273	0.983972	Not Significant
PDIA3_PAPAN	Rejection vs 3-month protocol	-0.0040719	0.927273	0.983972	Not Significant
TGFBI_PAPAN	Rejection vs 3-month protocol	-0.00611699	1	1	Not Significant
DDX17_PAPAN	Rejection vs 3-month protocol	-0.00758691	1	1	Not Significant
RPS16_PIG	Rejection vs 3-month protocol	-0.00790227	1	1	Not Significant
NEB_PAPAN	Rejection vs 3-month protocol	-0.00859251	0.787879	0.942964	Not Significant
GNPTG_PAPAN	Rejection vs 3-month protocol	-0.00921841	0.787879	0.942964	Not Significant
LDHA_PAPAN	Rejection vs 3-month protocol	-0.0111465	0.787879	0.942964	Not Significant
APOC1_PAPAN	Rejection vs 3-month protocol	-0.0159272	0.527273	0.884629	Not Significant
FAH_PAPAN	Rejection vs 3-month protocol	-0.0160447	1	1	Not Significant
FARSB_PAPAN	Rejection vs 3-month protocol	-0.016997	1	1	Not Significant
AKR1A1_PAPAN	Rejection vs 3-month protocol	-0.0183802	0.787879	0.942964	Not Significant
ALOX15_PAPAN	Rejection vs 3-month protocol	-0.0184087	0.927273	0.983972	Not Significant
ENPP2_PAPAN	Rejection vs 3-month protocol	-0.0186799	1	1	Not Significant
CARS1_PAPAN	Rejection vs 3-month protocol	-0.020029	0.927273	0.983972	Not Significant
ACSS3_PAPAN	Rejection vs 3-month protocol	-0.0201673	1	1	Not Significant
CD59_PAPAN	Rejection vs 3-month protocol	-0.0204464	0.927273	0.983972	Not Significant
RAB1B_PIG	Rejection vs 3-month protocol	-0.0204685	0.787879	0.942964	Not Significant
DECR1_PAPAN	Rejection vs 3-month protocol	-0.0206399	1	1	Not Significant
CLIP1_PAPAN	Rejection vs 3-month protocol	-0.0224678	0.927273	0.983972	Not Significant
PCCB_PAPAN	Rejection vs 3-month protocol	-0.0231673	0.927273	0.983972	Not Significant
HBB_PAPAN	Rejection vs 3-month protocol	-0.0237886	0.927273	0.983972	Not Significant
EEF1G_PAPAN	Rejection vs 3-month protocol	-0.0253566	0.787879	0.942964	Not Significant
SPRR4_PAPAN	Rejection vs 3-month protocol	-0.0259842	0.230303	0.735028	Not Significant
GAN_PAPAN	Rejection vs 3-month protocol	-0.026028	1	1	Not Significant
CRAT_PAPAN	Rejection vs 3-month protocol	-0.0264575	0.527273	0.884629	Not Significant
KYNU_PAPAN	Rejection vs 3-month protocol	-0.0282614	0.927273	0.983972	Not Significant
GAA_PAPAN	Rejection vs 3-month protocol	-0.0314809	0.787879	0.942964	Not Significant
ALDH3A1_PAPAN	Rejection vs 3-month protocol	-0.0316358	0.927273	0.983972	Not Significant
BLVRA_PAPAN	Rejection vs 3-month protocol	-0.0317951	0.787879	0.942964	Not Significant
ITGA1_PAPAN	Rejection vs 3-month protocol	-0.0320559	1	1	Not Significant
PDCD10_PIG	Rejection vs 3-month protocol	-0.032256	0.927273	0.983972	Not Significant
CAMP_PAPAN	Rejection vs 3-month protocol	-0.03306	1	1	Not Significant
GPS1_PAPAN	Rejection vs 3-month protocol	-0.0339239	0.927273	0.983972	Not Significant
MRI1_PAPAN	Rejection vs 3-month protocol	-0.0350039	0.927273	0.983972	Not Significant
FERMT3_PAPAN	Rejection vs 3-month protocol	-0.0354784	0.412121	0.83731	Not Significant
VWF_PAPAN	Rejection vs 3-month protocol	-0.0355417	0.527273	0.884629	Not Significant
ST6GAL1_PAPAN	Rejection vs 3-month protocol	-0.0365452	0.787879	0.942964	Not Significant
CMAS_PAPAN	Rejection vs 3-month protocol	-0.0373483	0.648485	0.929755	Not Significant
MAP4_PAPAN	Rejection vs 3-month protocol	-0.0380982	0.787879	0.942964	Not Significant
CPOX_PAPAN	Rejection vs 3-month protocol	-0.0392362	1	1	Not Significant
COL14A1_PAPAN	Rejection vs 3-month protocol	-0.0394348	0.648485	0.929755	Not Significant
TBCA_PAPAN	Rejection vs 3-month protocol	-0.040603	0.787879	0.942964	Not Significant
TREML1_PAPAN	Rejection vs 3-month protocol	-0.0412299	0.927273	0.983972	Not Significant
SLC1A5_PAPAN	Rejection vs 3-month protocol	-0.0421642	0.927273	0.983972	Not Significant
SLC25A5_PIG	Rejection vs 3-month protocol	-0.0431108	0.648485	0.929755	Not Significant
HNRNPA3_PIG	Rejection vs 3-month protocol	-0.0445759	1	1	Not Significant
PSMB8_PAPAN	Rejection vs 3-month protocol	-0.0451199	0.927273	0.983972	Not Significant
AMDHD2_PAPAN	Rejection vs 3-month protocol	-0.0471894	1	1	Not Significant
SOD1_PAPAN	Rejection vs 3-month protocol	-0.0492319	0.927273	0.983972	Not Significant
RO60_PAPAN	Rejection vs 3-month protocol	-0.0505741	0.927273	0.983972	Not Significant
LTBP4_PAPAN	Rejection vs 3-month protocol	-0.0507185	0.787879	0.942964	Not Significant
TPM4_PIG	Rejection vs 3-month protocol	-0.0508515	0.787879	0.942964	Not Significant
ANTXR2_PAPAN	Rejection vs 3-month protocol	-0.0512093	0.927273	0.983972	Not Significant
RPL17_PIG	Rejection vs 3-month protocol	-0.0553009	0.787879	0.942964	Not Significant
CANX_PAPAN	Rejection vs 3-month protocol	-0.0567591	0.927273	0.983972	Not Significant
BIN2_PAPAN	Rejection vs 3-month protocol	-0.0582425	0.927273	0.983972	Not Significant
ACAT2_PAPAN	Rejection vs 3-month protocol	-0.0585412	0.787879	0.942964	Not Significant
CYB5R3_PAPAN	Rejection vs 3-month protocol	-0.0588473	0.648485	0.929755	Not Significant
MACF1_PAPAN	Rejection vs 3-month protocol	-0.05938	0.927273	0.983972	Not Significant
POGLUT2_PAPAN	Rejection vs 3-month protocol	-0.059834	0.927273	0.983972	Not Significant
PGD_PAPAN	Rejection vs 3-month protocol	-0.0626715	0.787879	0.942964	Not Significant
MMP1_PAPAN	Rejection vs 3-month protocol	-0.0631398	0.927273	0.983972	Not Significant
ENOPH1_PAPAN	Rejection vs 3-month protocol	-0.0660536	0.648485	0.929755	Not Significant
ART4_PAPAN	Rejection vs 3-month protocol	-0.066677	0.787879	0.942964	Not Significant
CYP27A1_PAPAN	Rejection vs 3-month protocol	-0.0668167	0.787879	0.942964	Not Significant
COMP_PAPAN	Rejection vs 3-month protocol	-0.0692028	0.927273	0.983972	Not Significant
HADHA_PAPAN	Rejection vs 3-month protocol	-0.0703427	0.927273	0.983972	Not Significant
FLNA_PIG	Rejection vs 3-month protocol	-0.0705844	1	1	Not Significant
IGF2_PIG	Rejection vs 3-month protocol	-0.070751	1	1	Not Significant
SRRM2_PAPAN	Rejection vs 3-month protocol	-0.0726956	1	1	Not Significant
LRBA_PAPAN	Rejection vs 3-month protocol	-0.0732063	0.787879	0.942964	Not Significant
PF4V1_PAPAN	Rejection vs 3-month protocol	-0.0732757	0.648485	0.929755	Not Significant
MAN2A2_PAPAN	Rejection vs 3-month protocol	-0.0741096	0.927273	0.983972	Not Significant
SLC4A1_PAPAN	Rejection vs 3-month protocol	-0.0746047	0.787879	0.942964	Not Significant
C1QC_PAPAN	Rejection vs 3-month protocol	-0.075178	0.927273	0.983972	Not Significant
ALOX12B_PAPAN	Rejection vs 3-month protocol	-0.0753604	1	1	Not Significant
SERPINA5_PAPAN	Rejection vs 3-month protocol	-0.0801456	0.787879	0.942964	Not Significant
IGLV3-27_PAPAN	Rejection vs 3-month protocol	-0.0812065	0.927273	0.983972	Not Significant
MARCKSL1_PAPAN	Rejection vs 3-month protocol	-0.0813221	0.787879	0.942964	Not Significant
PEX11B_PIG	Rejection vs 3-month protocol	-0.0814571	0.412121	0.83731	Not Significant
DPP9_PAPAN	Rejection vs 3-month protocol	-0.0821311	0.787879	0.942964	Not Significant
ARMT1_PAPAN	Rejection vs 3-month protocol	-0.0823689	0.527273	0.884629	Not Significant
THBS1_PAPAN	Rejection vs 3-month protocol	-0.0823884	1	1	Not Significant
UBR4_PAPAN	Rejection vs 3-month protocol	-0.0826569	0.787879	0.942964	Not Significant
TGM5_PAPAN	Rejection vs 3-month protocol	-0.0827341	0.927273	0.983972	Not Significant
CKB_PAPAN	Rejection vs 3-month protocol	-0.085702	0.527273	0.884629	Not Significant
GCLC_PAPAN	Rejection vs 3-month protocol	-0.0875175	0.787879	0.942964	Not Significant
CFB_PIG	Rejection vs 3-month protocol	-0.0885609	1	1	Not Significant
ITGA2_PAPAN	Rejection vs 3-month protocol	-0.0888165	0.787879	0.942964	Not Significant
SLC16A3_PAPAN	Rejection vs 3-month protocol	-0.0891586	0.787879	0.942964	Not Significant
COL6A3_PAPAN	Rejection vs 3-month protocol	-0.0896131	1	1	Not Significant
SF3B2_PAPAN	Rejection vs 3-month protocol	-0.0897539	0.927273	0.983972	Not Significant
ANGPTL8_PAPAN	Rejection vs 3-month protocol	-0.0904428	0.787879	0.942964	Not Significant
MPI_PAPAN	Rejection vs 3-month protocol	-0.0912292	0.787879	0.942964	Not Significant
FLNB_PAPAN	Rejection vs 3-month protocol	-0.0917918	0.927273	0.983972	Not Significant
SEC23IP_PAPAN	Rejection vs 3-month protocol	-0.0922298	0.787879	0.942964	Not Significant
KLHL41_PAPAN	Rejection vs 3-month protocol	-0.094387	0.927273	0.983972	Not Significant
SSB_PAPAN	Rejection vs 3-month protocol	-0.094481	0.527273	0.884629	Not Significant
PLXNB2_PAPAN	Rejection vs 3-month protocol	-0.0945958	0.927273	0.983972	Not Significant
MRC1_PAPAN	Rejection vs 3-month protocol	-0.0949159	0.927273	0.983972	Not Significant
ITIH4_PAPAN	Rejection vs 3-month protocol	-0.095796	0.927273	0.983972	Not Significant
GART_PIG	Rejection vs 3-month protocol	-0.0974498	0.787879	0.942964	Not Significant
CLU_PAPAN	Rejection vs 3-month protocol	-0.0979036	0.787879	0.942964	Not Significant
IARS2_PAPAN	Rejection vs 3-month protocol	-0.0997356	1	1	Not Significant
STEAP3_PAPAN	Rejection vs 3-month protocol	-0.101204	0.787879	0.942964	Not Significant
CSTA_PAPAN	Rejection vs 3-month protocol	-0.103144	0.648485	0.929755	Not Significant
RAN_PIG	Rejection vs 3-month protocol	-0.103327	0.787879	0.942964	Not Significant
AGXT2_PAPAN	Rejection vs 3-month protocol	-0.103402	0.315152	0.795519	Not Significant
ZG16_PAPAN	Rejection vs 3-month protocol	-0.104156	0.927273	0.983972	Not Significant
DCXR_PAPAN	Rejection vs 3-month protocol	-0.104247	0.648485	0.929755	Not Significant
KHSRP_PIG	Rejection vs 3-month protocol	-0.105898	0.527273	0.884629	Not Significant
EFEMP1_PIG	Rejection vs 3-month protocol	-0.105986	0.787879	0.942964	Not Significant
RPS7_PIG	Rejection vs 3-month protocol	-0.105998	0.927273	0.983972	Not Significant
RNPEP_PAPAN	Rejection vs 3-month protocol	-0.106798	1	1	Not Significant
CHL1_PAPAN	Rejection vs 3-month protocol	-0.107102	1	1	Not Significant
CPA4_PAPAN	Rejection vs 3-month protocol	-0.108064	1	1	Not Significant
KRT80_PAPAN	Rejection vs 3-month protocol	-0.108313	0.527273	0.884629	Not Significant
TALDO1_PAPAN	Rejection vs 3-month protocol	-0.109307	0.927273	0.983972	Not Significant
ALOXE3_PAPAN	Rejection vs 3-month protocol	-0.110569	0.412121	0.83731	Not Significant
GALNT7_PAPAN	Rejection vs 3-month protocol	-0.110578	0.927273	0.983972	Not Significant
SRPK1_PIG	Rejection vs 3-month protocol	-0.111327	1	1	Not Significant
HDLBP_PAPAN	Rejection vs 3-month protocol	-0.111974	0.787879	0.942964	Not Significant
TPM3_PIG	Rejection vs 3-month protocol	-0.112626	0.527273	0.884629	Not Significant
HMOX2_PAPAN	Rejection vs 3-month protocol	-0.112984	0.230303	0.735028	Not Significant
ABCA12_PAPAN	Rejection vs 3-month protocol	-0.113537	1	1	Not Significant
SELL_PIG	Rejection vs 3-month protocol	-0.113829	0.648485	0.929755	Not Significant
GOT2_PIG	Rejection vs 3-month protocol	-0.114079	0.648485	0.929755	Not Significant
HGD_PAPAN	Rejection vs 3-month protocol	-0.114118	0.927273	0.983972	Not Significant
INF2_PIG	Rejection vs 3-month protocol	-0.114547	0.787879	0.942964	Not Significant
PLIN4_PAPAN	Rejection vs 3-month protocol	-0.116886	0.527273	0.884629	Not Significant
ACTN4_PAPAN	Rejection vs 3-month protocol	-0.118291	0.787879	0.942964	Not Significant
DSG1_PAPAN	Rejection vs 3-month protocol	-0.118645	0.648485	0.929755	Not Significant
DSC2_PAPAN	Rejection vs 3-month protocol	-0.118899	0.927273	0.983972	Not Significant
CAMK2D_PIG	Rejection vs 3-month protocol	-0.120842	0.648485	0.929755	Not Significant
PLSCR1_PAPAN	Rejection vs 3-month protocol	-0.120854	0.927273	0.983972	Not Significant
TINAGL1_PAPAN	Rejection vs 3-month protocol	-0.122655	0.927273	0.983972	Not Significant
ABAT_PAPAN	Rejection vs 3-month protocol	-0.123016	0.787879	0.942964	Not Significant
KRT84_PAPAN	Rejection vs 3-month protocol	-0.123093	0.927273	0.983972	Not Significant
DOK3_PAPAN	Rejection vs 3-month protocol	-0.123293	1	1	Not Significant
CD44_PAPAN	Rejection vs 3-month protocol	-0.124044	0.787879	0.942964	Not Significant
USP5_PAPAN	Rejection vs 3-month protocol	-0.124479	0.648485	0.929755	Not Significant
KRT8_PIG	Rejection vs 3-month protocol	-0.124888	0.927273	0.983972	Not Significant
PROZ_PAPAN	Rejection vs 3-month protocol	-0.125206	1	1	Not Significant
NPEPPS_PAPAN	Rejection vs 3-month protocol	-0.125731	1	1	Not Significant
CD226_PAPAN	Rejection vs 3-month protocol	-0.126123	0.527273	0.884629	Not Significant
PSME2_PAPAN	Rejection vs 3-month protocol	-0.127574	0.787879	0.942964	Not Significant
THBS4_PAPAN	Rejection vs 3-month protocol	-0.128738	0.787879	0.942964	Not Significant
PSMC6_PIG	Rejection vs 3-month protocol	-0.129465	0.648485	0.929755	Not Significant
DHODH_PAPAN	Rejection vs 3-month protocol	-0.134025	0.315152	0.795519	Not Significant
DBNL_PAPAN	Rejection vs 3-month protocol	-0.135999	0.927273	0.983972	Not Significant
PTPRF_PAPAN	Rejection vs 3-month protocol	-0.137372	0.648485	0.929755	Not Significant
GPNMB_PAPAN	Rejection vs 3-month protocol	-0.137493	1	1	Not Significant
NRP2_PAPAN	Rejection vs 3-month protocol	-0.139353	0.412121	0.83731	Not Significant
EVPL_PAPAN	Rejection vs 3-month protocol	-0.139592	0.648485	0.929755	Not Significant
LRPPRC_PAPAN	Rejection vs 3-month protocol	-0.140717	0.927273	0.983972	Not Significant
HPRT1_PAPAN	Rejection vs 3-month protocol	-0.141307	0.787879	0.942964	Not Significant
XDH_PAPAN	Rejection vs 3-month protocol	-0.141968	0.527273	0.884629	Not Significant
CACNA2D1_PAPAN	Rejection vs 3-month protocol	-0.142213	0.787879	0.942964	Not Significant
ALDH3B1_PAPAN	Rejection vs 3-month protocol	-0.142913	0.527273	0.884629	Not Significant
ATP5F1A_PIG	Rejection vs 3-month protocol	-0.145848	0.412121	0.83731	Not Significant
ACADS_PAPAN	Rejection vs 3-month protocol	-0.146037	0.787879	0.942964	Not Significant
QARS1_PAPAN	Rejection vs 3-month protocol	-0.146152	0.927273	0.983972	Not Significant
STC2_PAPAN	Rejection vs 3-month protocol	-0.147815	0.648485	0.929755	Not Significant
ALDH1L1_PAPAN	Rejection vs 3-month protocol	-0.148079	0.927273	0.983972	Not Significant
HCK_PAPAN	Rejection vs 3-month protocol	-0.1513	1	1	Not Significant
APOF_PAPAN	Rejection vs 3-month protocol	-0.151717	0.787879	0.942964	Not Significant
SEPTIN2_PAPAN	Rejection vs 3-month protocol	-0.153682	0.527273	0.884629	Not Significant
HIP1R_PAPAN	Rejection vs 3-month protocol	-0.154418	0.787879	0.942964	Not Significant
HSPA4_PAPAN	Rejection vs 3-month protocol	-0.154575	0.648485	0.929755	Not Significant
HBA_PAPAN	Rejection vs 3-month protocol	-0.155827	0.927273	0.983972	Not Significant
OAS1_PAPAN	Rejection vs 3-month protocol	-0.157489	0.787879	0.942964	Not Significant
IFI16_PAPAN	Rejection vs 3-month protocol	-0.157834	0.787879	0.942964	Not Significant
BPI_PAPAN	Rejection vs 3-month protocol	-0.158265	0.648485	0.929755	Not Significant
FMNL1_PAPAN	Rejection vs 3-month protocol	-0.159378	0.527273	0.884629	Not Significant
PYGB_PAPAN	Rejection vs 3-month protocol	-0.159646	0.527273	0.884629	Not Significant
PTBP3_PIG	Rejection vs 3-month protocol	-0.16026	0.927273	0.983972	Not Significant
MMP19_PAPAN	Rejection vs 3-month protocol	-0.160297	0.787879	0.942964	Not Significant
FGL1_PAPAN	Rejection vs 3-month protocol	-0.160323	0.412121	0.83731	Not Significant
MPST_PAPAN	Rejection vs 3-month protocol	-0.160833	0.230303	0.735028	Not Significant
SHMT2_PAPAN	Rejection vs 3-month protocol	-0.16157	0.787879	0.942964	Not Significant
FAM83H_PAPAN	Rejection vs 3-month protocol	-0.16158	0.927273	0.983972	Not Significant
HPX_PAPAN	Rejection vs 3-month protocol	-0.162851	0.787879	0.942964	Not Significant
FGFBP2_PAPAN	Rejection vs 3-month protocol	-0.163417	0.927273	0.983972	Not Significant
PLA2G4E_PAPAN	Rejection vs 3-month protocol	-0.163433	0.527273	0.884629	Not Significant
DTYMK_PAPAN	Rejection vs 3-month protocol	-0.163873	0.648485	0.929755	Not Significant
F11_PAPAN	Rejection vs 3-month protocol	-0.165432	0.648485	0.929755	Not Significant
IDUA_PAPAN	Rejection vs 3-month protocol	-0.165631	0.927273	0.983972	Not Significant
SERPING1_PAPAN	Rejection vs 3-month protocol	-0.166039	0.527273	0.884629	Not Significant
PDIA6_PAPAN	Rejection vs 3-month protocol	-0.168087	0.527273	0.884629	Not Significant
FTCD_PAPAN	Rejection vs 3-month protocol	-0.169065	0.787879	0.942964	Not Significant
SVIL_PAPAN	Rejection vs 3-month protocol	-0.169234	0.787879	0.942964	Not Significant
OXSR1_PAPAN	Rejection vs 3-month protocol	-0.170342	1	1	Not Significant
RASA3_PAPAN	Rejection vs 3-month protocol	-0.170505	0.648485	0.929755	Not Significant
SLC25A24_PAPAN	Rejection vs 3-month protocol	-0.170786	0.787879	0.942964	Not Significant
SLC29A1_PAPAN	Rejection vs 3-month protocol	-0.17429	0.927273	0.983972	Not Significant
CD82_PAPAN	Rejection vs 3-month protocol	-0.174494	0.648485	0.929755	Not Significant
GDI1_PAPAN	Rejection vs 3-month protocol	-0.17457	0.527273	0.884629	Not Significant
KRT39_PAPAN	Rejection vs 3-month protocol	-0.176864	0.787879	0.942964	Not Significant
IL1R2_PAPAN	Rejection vs 3-month protocol	-0.177469	0.927273	0.983972	Not Significant
ACY1_PAPAN	Rejection vs 3-month protocol	-0.177794	0.927273	0.983972	Not Significant
BASP1_PAPAN	Rejection vs 3-month protocol	-0.180025	1	1	Not Significant
CLIC3_PAPAN	Rejection vs 3-month protocol	-0.180179	0.527273	0.884629	Not Significant
MBL2_PAPAN	Rejection vs 3-month protocol	-0.181102	0.527273	0.884629	Not Significant
GPI_PAPAN	Rejection vs 3-month protocol	-0.182178	0.648485	0.929755	Not Significant
JPT2_PAPAN	Rejection vs 3-month protocol	-0.18219	0.927273	0.983972	Not Significant
SRPRB_PAPAN	Rejection vs 3-month protocol	-0.18224	0.927273	0.983972	Not Significant
MYOC_PAPAN	Rejection vs 3-month protocol	-0.182594	0.527273	0.884629	Not Significant
CCT7_PAPAN	Rejection vs 3-month protocol	-0.187001	0.787879	0.942964	Not Significant
MST1_PAPAN	Rejection vs 3-month protocol	-0.187091	0.648485	0.929755	Not Significant
PLIN1_PAPAN	Rejection vs 3-month protocol	-0.187379	1	1	Not Significant
PGLS_PAPAN	Rejection vs 3-month protocol	-0.187469	0.787879	0.942964	Not Significant
C1RL_PAPAN	Rejection vs 3-month protocol	-0.187798	0.787879	0.942964	Not Significant
GAPDH_PIG	Rejection vs 3-month protocol	-0.187963	0.927273	0.983972	Not Significant
CORO1C_PIG	Rejection vs 3-month protocol	-0.18815	0.927273	0.983972	Not Significant
PGM2_PAPAN	Rejection vs 3-month protocol	-0.189671	0.927273	0.983972	Not Significant
CXCL9_PAPAN	Rejection vs 3-month protocol	-0.189768	0.648485	0.929755	Not Significant
AKR1C1_PAPAN	Rejection vs 3-month protocol	-0.18979	0.230303	0.735028	Not Significant
HSPA5_PAPAN	Rejection vs 3-month protocol	-0.190122	1	1	Not Significant
OSMR_PAPAN	Rejection vs 3-month protocol	-0.190906	0.787879	0.942964	Not Significant
CD163_PAPAN	Rejection vs 3-month protocol	-0.191267	0.787879	0.942964	Not Significant
NIBAN1_PAPAN	Rejection vs 3-month protocol	-0.192243	0.787879	0.942964	Not Significant
EMILIN2_PAPAN	Rejection vs 3-month protocol	-0.192687	0.787879	0.942964	Not Significant
SELP_PAPAN	Rejection vs 3-month protocol	-0.192965	0.787879	0.942964	Not Significant
F11R_PAPAN	Rejection vs 3-month protocol	-0.19318	0.527273	0.884629	Not Significant
CDC42BPB_PIG	Rejection vs 3-month protocol	-0.193808	0.927273	0.983972	Not Significant
NDRG1_PIG	Rejection vs 3-month protocol	-0.193845	0.648485	0.929755	Not Significant
CLSTN1_PAPAN	Rejection vs 3-month protocol	-0.194329	0.648485	0.929755	Not Significant
SLK_PAPAN	Rejection vs 3-month protocol	-0.195012	0.787879	0.942964	Not Significant
SDR16C5_PAPAN	Rejection vs 3-month protocol	-0.196865	0.648485	0.929755	Not Significant
ALDOA_PIG	Rejection vs 3-month protocol	-0.197358	0.787879	0.942964	Not Significant
RETN_PAPAN	Rejection vs 3-month protocol	-0.197487	0.230303	0.735028	Not Significant
MYO1C_PAPAN	Rejection vs 3-month protocol	-0.197564	0.927273	0.983972	Not Significant
TST_PAPAN	Rejection vs 3-month protocol	-0.198765	0.927273	0.983972	Not Significant
MYH9_PAPAN	Rejection vs 3-month protocol	-0.19951	0.527273	0.884629	Not Significant
RECK_PAPAN	Rejection vs 3-month protocol	-0.200685	0.787879	0.942964	Not Significant
TTLL12_PAPAN	Rejection vs 3-month protocol	-0.201455	1	1	Not Significant
ST3GAL1_PAPAN	Rejection vs 3-month protocol	-0.202003	0.412121	0.83731	Not Significant
AK1_PAPAN	Rejection vs 3-month protocol	-0.202061	0.648485	0.929755	Not Significant
FUCA2_PAPAN	Rejection vs 3-month protocol	-0.202247	0.527273	0.884629	Not Significant
IGFBP6_PAPAN	Rejection vs 3-month protocol	-0.202361	0.315152	0.795519	Not Significant
UGP2_PAPAN	Rejection vs 3-month protocol	-0.204655	0.648485	0.929755	Not Significant
C9_PAPAN	Rejection vs 3-month protocol	-0.205462	0.412121	0.83731	Not Significant
CAST_PAPAN	Rejection vs 3-month protocol	-0.205606	0.527273	0.884629	Not Significant
WDR1_PAPAN	Rejection vs 3-month protocol	-0.20677	0.527273	0.884629	Not Significant
SLC3A2_PAPAN	Rejection vs 3-month protocol	-0.207456	0.527273	0.884629	Not Significant
PLXNB1_PAPAN	Rejection vs 3-month protocol	-0.207512	0.787879	0.942964	Not Significant
MINPP1_PAPAN	Rejection vs 3-month protocol	-0.208191	0.787879	0.942964	Not Significant
HEG1_PAPAN	Rejection vs 3-month protocol	-0.20834	0.787879	0.942964	Not Significant
HM13_PAPAN	Rejection vs 3-month protocol	-0.208785	0.315152	0.795519	Not Significant
GPD1_PAPAN	Rejection vs 3-month protocol	-0.208979	0.648485	0.929755	Not Significant
COLEC11_PAPAN	Rejection vs 3-month protocol	-0.20958	0.648485	0.929755	Not Significant
CPXM2_PAPAN	Rejection vs 3-month protocol	-0.209747	0.927273	0.983972	Not Significant
KRT77_PAPAN	Rejection vs 3-month protocol	-0.210593	0.927273	0.983972	Not Significant
LNPK_PAPAN	Rejection vs 3-month protocol	-0.211781	0.927273	0.983972	Not Significant
LYZ_PAPAN	Rejection vs 3-month protocol	-0.211869	0.315152	0.795519	Not Significant
COPE_PAPAN	Rejection vs 3-month protocol	-0.212348	0.927273	0.983972	Not Significant
ADIPOQ_PIG	Rejection vs 3-month protocol	-0.212384	0.927273	0.983972	Not Significant
GCLM_PAPAN	Rejection vs 3-month protocol	-0.213308	0.315152	0.795519	Not Significant
SLC2A14_PAPAN	Rejection vs 3-month protocol	-0.213468	0.927273	0.983972	Not Significant
EIF3A_PAPAN	Rejection vs 3-month protocol	-0.214096	1	1	Not Significant
C16orf54_PAPAN	Rejection vs 3-month protocol	-0.215117	0.648485	0.929755	Not Significant
H2BC4_PIG	Rejection vs 3-month protocol	-0.215242	0.787879	0.942964	Not Significant
ADD1_PAPAN	Rejection vs 3-month protocol	-0.215561	0.527273	0.884629	Not Significant
PAK2_PAPAN	Rejection vs 3-month protocol	-0.216922	0.787879	0.942964	Not Significant
NUP93_PAPAN	Rejection vs 3-month protocol	-0.216956	0.927273	0.983972	Not Significant
FABP1_PAPAN	Rejection vs 3-month protocol	-0.219887	0.527273	0.884629	Not Significant
CAPG_PAPAN	Rejection vs 3-month protocol	-0.219889	0.412121	0.83731	Not Significant
FNTA_PAPAN	Rejection vs 3-month protocol	-0.221477	0.230303	0.735028	Not Significant
GFUS_PAPAN	Rejection vs 3-month protocol	-0.221729	0.527273	0.884629	Not Significant
UNC45A_PAPAN	Rejection vs 3-month protocol	-0.222709	0.648485	0.929755	Not Significant
PLCB3_PIG	Rejection vs 3-month protocol	-0.223052	0.927273	0.983972	Not Significant
PALMD_PAPAN	Rejection vs 3-month protocol	-0.223111	0.648485	0.929755	Not Significant
UPB1_PAPAN	Rejection vs 3-month protocol	-0.223315	0.412121	0.83731	Not Significant
CSPG4_PIG	Rejection vs 3-month protocol	-0.225268	0.412121	0.83731	Not Significant
KRT78_PAPAN	Rejection vs 3-month protocol	-0.225514	0.787879	0.942964	Not Significant
ITGAV_PAPAN	Rejection vs 3-month protocol	-0.226936	0.927273	0.983972	Not Significant
NCCRP1_PAPAN	Rejection vs 3-month protocol	-0.227334	0.787879	0.942964	Not Significant
NQO2_PAPAN	Rejection vs 3-month protocol	-0.227488	0.648485	0.929755	Not Significant
ENTPD6_PAPAN	Rejection vs 3-month protocol	-0.22805	0.927273	0.983972	Not Significant
DSG2_PAPAN	Rejection vs 3-month protocol	-0.228725	0.412121	0.83731	Not Significant
SQLE_PAPAN	Rejection vs 3-month protocol	-0.232077	0.527273	0.884629	Not Significant
MAN1C1_PAPAN	Rejection vs 3-month protocol	-0.232833	0.648485	0.929755	Not Significant
RNASE4_PAPAN	Rejection vs 3-month protocol	-0.233426	0.648485	0.929755	Not Significant
C1QB_PAPAN	Rejection vs 3-month protocol	-0.233949	0.787879	0.942964	Not Significant
PKN1_PAPAN	Rejection vs 3-month protocol	-0.235347	0.787879	0.942964	Not Significant
CTSV_PAPAN	Rejection vs 3-month protocol	-0.235667	0.927273	0.983972	Not Significant
PSMA3_PIG	Rejection vs 3-month protocol	-0.235774	0.412121	0.83731	Not Significant
EMILIN1_PAPAN	Rejection vs 3-month protocol	-0.235828	0.648485	0.929755	Not Significant
NIF3L1_PAPAN	Rejection vs 3-month protocol	-0.235892	0.527273	0.884629	Not Significant
CFI_PIG	Rejection vs 3-month protocol	-0.236223	0.648485	0.929755	Not Significant
TOR1B_PAPAN	Rejection vs 3-month protocol	-0.23742	0.412121	0.83731	Not Significant
FPR1_PAPAN	Rejection vs 3-month protocol	-0.237515	0.315152	0.795519	Not Significant
DDC_PAPAN	Rejection vs 3-month protocol	-0.23889	0.163636	0.706265	Not Significant
HEPHL1_PAPAN	Rejection vs 3-month protocol	-0.240467	1	1	Not Significant
IGLV9-49_PAPAN	Rejection vs 3-month protocol	-0.240574	0.412121	0.83731	Not Significant
NT5E_PAPAN	Rejection vs 3-month protocol	-0.240666	0.315152	0.795519	Not Significant
APOH_PAPAN	Rejection vs 3-month protocol	-0.243059	0.230303	0.735028	Not Significant
CTSH_PAPAN	Rejection vs 3-month protocol	-0.24324	0.527273	0.884629	Not Significant
MYL3_PAPAN	Rejection vs 3-month protocol	-0.24356	0.315152	0.795519	Not Significant
ANXA11_PAPAN	Rejection vs 3-month protocol	-0.243624	0.648485	0.929755	Not Significant
TF_PIG	Rejection vs 3-month protocol	-0.245213	0.927273	0.983972	Not Significant
LSR_PAPAN	Rejection vs 3-month protocol	-0.245873	0.230303	0.735028	Not Significant
CYP51A1_PAPAN	Rejection vs 3-month protocol	-0.246472	0.787879	0.942964	Not Significant
AHCY_PAPAN	Rejection vs 3-month protocol	-0.246715	0.527273	0.884629	Not Significant
GOLGA4_PAPAN	Rejection vs 3-month protocol	-0.247832	0.787879	0.942964	Not Significant
CPB2_PAPAN	Rejection vs 3-month protocol	-0.24842	0.527273	0.884629	Not Significant
ACOX2_PAPAN	Rejection vs 3-month protocol	-0.24881	0.648485	0.929755	Not Significant
CPQ_PAPAN	Rejection vs 3-month protocol	-0.249725	0.648485	0.929755	Not Significant
ALDH16A1_PAPAN	Rejection vs 3-month protocol	-0.250122	0.787879	0.942964	Not Significant
HK3_PAPAN	Rejection vs 3-month protocol	-0.250625	0.927273	0.983972	Not Significant
DCAF8_PAPAN	Rejection vs 3-month protocol	-0.250895	0.527273	0.884629	Not Significant
PSMD5_PAPAN	Rejection vs 3-month protocol	-0.25093	0.648485	0.929755	Not Significant
CFI_PAPAN	Rejection vs 3-month protocol	-0.254797	0.787879	0.942964	Not Significant
MYBPC1_PAPAN	Rejection vs 3-month protocol	-0.256312	0.163636	0.706265	Not Significant
HSPA9_PAPAN	Rejection vs 3-month protocol	-0.259666	0.527273	0.884629	Not Significant
PPID_PIG	Rejection vs 3-month protocol	-0.259773	0.315152	0.795519	Not Significant
AHSG_PAPAN	Rejection vs 3-month protocol	-0.25999	0.315152	0.795519	Not Significant
CTSL_PAPAN	Rejection vs 3-month protocol	-0.26037	0.412121	0.83731	Not Significant
CAP2_PAPAN	Rejection vs 3-month protocol	-0.260777	0.648485	0.929755	Not Significant
PROCR_PAPAN	Rejection vs 3-month protocol	-0.260976	0.787879	0.942964	Not Significant
ARHGEF1_PAPAN	Rejection vs 3-month protocol	-0.261787	0.648485	0.929755	Not Significant
CFL1_PIG	Rejection vs 3-month protocol	-0.262696	0.412121	0.83731	Not Significant
RDH10_PAPAN	Rejection vs 3-month protocol	-0.262735	0.527273	0.884629	Not Significant
F12_PAPAN	Rejection vs 3-month protocol	-0.263391	0.315152	0.795519	Not Significant
SSBP1_PAPAN	Rejection vs 3-month protocol	-0.263687	0.230303	0.735028	Not Significant
CAPN1_PAPAN	Rejection vs 3-month protocol	-0.264548	0.412121	0.83731	Not Significant
THY1_PAPAN	Rejection vs 3-month protocol	-0.267009	0.787879	0.942964	Not Significant
APOC4_PAPAN	Rejection vs 3-month protocol	-0.26813	0.527273	0.884629	Not Significant
EFEMP1_PAPAN	Rejection vs 3-month protocol	-0.268773	0.648485	0.929755	Not Significant
LAMC1_PAPAN	Rejection vs 3-month protocol	-0.268886	0.648485	0.929755	Not Significant
PLEK_PAPAN	Rejection vs 3-month protocol	-0.270187	0.648485	0.929755	Not Significant
CA4_PAPAN	Rejection vs 3-month protocol	-0.271344	0.412121	0.83731	Not Significant
SHBG_PAPAN	Rejection vs 3-month protocol	-0.271424	0.787879	0.942964	Not Significant
SERPINF2_PIG	Rejection vs 3-month protocol	-0.272191	0.787879	0.942964	Not Significant
GGH_PAPAN	Rejection vs 3-month protocol	-0.272459	0.315152	0.795519	Not Significant
ANXA3_PAPAN	Rejection vs 3-month protocol	-0.274424	0.787879	0.942964	Not Significant
ME1_PAPAN	Rejection vs 3-month protocol	-0.27472	0.648485	0.929755	Not Significant
AUH_PAPAN	Rejection vs 3-month protocol	-0.275561	0.787879	0.942964	Not Significant
BCAM_PAPAN	Rejection vs 3-month protocol	-0.275756	0.230303	0.735028	Not Significant
CTSA_PAPAN	Rejection vs 3-month protocol	-0.276493	0.315152	0.795519	Not Significant
ABCC1_PAPAN	Rejection vs 3-month protocol	-0.278042	0.315152	0.795519	Not Significant
ITGA6_PAPAN	Rejection vs 3-month protocol	-0.278279	0.787879	0.942964	Not Significant
KRT79_PAPAN	Rejection vs 3-month protocol	-0.278423	0.230303	0.735028	Not Significant
RPS13_PIG	Rejection vs 3-month protocol	-0.280446	0.787879	0.942964	Not Significant
KRT85_PIG	Rejection vs 3-month protocol	-0.281129	0.163636	0.706265	Not Significant
IGFBP3_PAPAN	Rejection vs 3-month protocol	-0.281514	0.787879	0.942964	Not Significant
ITGA4_PAPAN	Rejection vs 3-month protocol	-0.283086	0.412121	0.83731	Not Significant
CLEC11A_PAPAN	Rejection vs 3-month protocol	-0.28442	0.527273	0.884629	Not Significant
FCHSD1_PAPAN	Rejection vs 3-month protocol	-0.286348	0.230303	0.735028	Not Significant
PFN1_PAPAN	Rejection vs 3-month protocol	-0.286747	0.787879	0.942964	Not Significant
IFI6_PAPAN	Rejection vs 3-month protocol	-0.28843	0.927273	0.983972	Not Significant
TUBB_PIG	Rejection vs 3-month protocol	-0.289547	0.412121	0.83731	Not Significant
ATP12A_PAPAN	Rejection vs 3-month protocol	-0.289881	0.787879	0.942964	Not Significant
CD40LG_PAPAN	Rejection vs 3-month protocol	-0.28994	0.527273	0.884629	Not Significant
MMP3_PAPAN	Rejection vs 3-month protocol	-0.290737	0.787879	0.942964	Not Significant
HABP2_PAPAN	Rejection vs 3-month protocol	-0.290963	0.527273	0.884629	Not Significant
HSPG2_PAPAN	Rejection vs 3-month protocol	-0.291953	0.527273	0.884629	Not Significant
SEMA4B_PAPAN	Rejection vs 3-month protocol	-0.292642	0.163636	0.706265	Not Significant
KRT32_PAPAN	Rejection vs 3-month protocol	-0.292944	0.412121	0.83731	Not Significant
PTPRC_PAPAN	Rejection vs 3-month protocol	-0.293346	0.315152	0.795519	Not Significant
APEX1_PAPAN	Rejection vs 3-month protocol	-0.293645	0.230303	0.735028	Not Significant
NCAM1_PIG	Rejection vs 3-month protocol	-0.29379	0.163636	0.706265	Not Significant
SERPINA10_PAPAN	Rejection vs 3-month protocol	-0.294371	0.648485	0.929755	Not Significant
ABCF1_PAPAN	Rejection vs 3-month protocol	-0.295627	0.412121	0.83731	Not Significant
NAGLU_PAPAN	Rejection vs 3-month protocol	-0.296754	0.648485	0.929755	Not Significant
SERPINF1_PAPAN	Rejection vs 3-month protocol	-0.296878	0.315152	0.795519	Not Significant
ITIH3_PAPAN	Rejection vs 3-month protocol	-0.297283	0.648485	0.929755	Not Significant
GOT1_PAPAN	Rejection vs 3-month protocol	-0.29733	0.927273	0.983972	Not Significant
C7_PAPAN	Rejection vs 3-month protocol	-0.297362	0.648485	0.929755	Not Significant
IGFBPL1_PAPAN	Rejection vs 3-month protocol	-0.297877	0.527273	0.884629	Not Significant
NCLN_PAPAN	Rejection vs 3-month protocol	-0.299365	0.315152	0.795519	Not Significant
MMADHC_PAPAN	Rejection vs 3-month protocol	-0.29987	0.648485	0.929755	Not Significant
BLMH_PAPAN	Rejection vs 3-month protocol	-0.299912	0.412121	0.83731	Not Significant
TPM1_PIG	Rejection vs 3-month protocol	-0.299967	0.787879	0.942964	Not Significant
UPP1_PAPAN	Rejection vs 3-month protocol	-0.300078	0.315152	0.795519	Not Significant
ATP2B4_PAPAN	Rejection vs 3-month protocol	-0.300362	0.412121	0.83731	Not Significant
UBA1_PAPAN	Rejection vs 3-month protocol	-0.300759	0.412121	0.83731	Not Significant
VTN_PAPAN	Rejection vs 3-month protocol	-0.300828	0.315152	0.795519	Not Significant
THOP1_PAPAN	Rejection vs 3-month protocol	-0.302403	0.315152	0.795519	Not Significant
TNXB_PIG	Rejection vs 3-month protocol	-0.302787	0.648485	0.929755	Not Significant
PDGFRB_PAPAN	Rejection vs 3-month protocol	-0.303748	0.527273	0.884629	Not Significant
PTPN6_PAPAN	Rejection vs 3-month protocol	-0.304389	0.787879	0.942964	Not Significant
AHSA1_PAPAN	Rejection vs 3-month protocol	-0.304675	0.927273	0.983972	Not Significant
CYB5R1_PAPAN	Rejection vs 3-month protocol	-0.305095	0.527273	0.884629	Not Significant
ICAM1_PAPAN	Rejection vs 3-month protocol	-0.30514	0.315152	0.795519	Not Significant
ANK1_PAPAN	Rejection vs 3-month protocol	-0.30586	0.412121	0.83731	Not Significant
CCN5_PAPAN	Rejection vs 3-month protocol	-0.306128	0.927273	0.983972	Not Significant
HAGH_PAPAN	Rejection vs 3-month protocol	-0.306521	0.315152	0.795519	Not Significant
ATL3_PAPAN	Rejection vs 3-month protocol	-0.306925	0.163636	0.706265	Not Significant
TIE1_PAPAN	Rejection vs 3-month protocol	-0.307046	0.412121	0.83731	Not Significant
GPX1_PAPAN	Rejection vs 3-month protocol	-0.307376	0.787879	0.942964	Not Significant
COLGALT1_PAPAN	Rejection vs 3-month protocol	-0.308636	0.315152	0.795519	Not Significant
CYB5R2_PAPAN	Rejection vs 3-month protocol	-0.308808	0.315152	0.795519	Not Significant
SMPD1_PAPAN	Rejection vs 3-month protocol	-0.308855	0.315152	0.795519	Not Significant
ATP1B3_PAPAN	Rejection vs 3-month protocol	-0.309303	0.163636	0.706265	Not Significant
ALCAM_PAPAN	Rejection vs 3-month protocol	-0.310531	0.527273	0.884629	Not Significant
QSOX1_PAPAN	Rejection vs 3-month protocol	-0.311301	0.787879	0.942964	Not Significant
MMP9_PAPAN	Rejection vs 3-month protocol	-0.312339	0.648485	0.929755	Not Significant
BBOX1_PAPAN	Rejection vs 3-month protocol	-0.312638	0.412121	0.83731	Not Significant
CFH_PAPAN	Rejection vs 3-month protocol	-0.314601	0.230303	0.735028	Not Significant
MYO1G_PAPAN	Rejection vs 3-month protocol	-0.314771	0.315152	0.795519	Not Significant
CDH1_PAPAN	Rejection vs 3-month protocol	-0.315647	0.648485	0.929755	Not Significant
GOLM1_PAPAN	Rejection vs 3-month protocol	-0.316058	0.787879	0.942964	Not Significant
GCN1_PAPAN	Rejection vs 3-month protocol	-0.317191	0.315152	0.795519	Not Significant
NDUFV1_PIG	Rejection vs 3-month protocol	-0.317254	0.648485	0.929755	Not Significant
LDHB_PAPAN	Rejection vs 3-month protocol	-0.317416	0.527273	0.884629	Not Significant
GLS_PIG	Rejection vs 3-month protocol	-0.317681	0.315152	0.795519	Not Significant
ADGRG6_PAPAN	Rejection vs 3-month protocol	-0.318522	0.527273	0.884629	Not Significant
PDHA1_PIG	Rejection vs 3-month protocol	-0.318659	0.527273	0.884629	Not Significant
ACSF2_PAPAN	Rejection vs 3-month protocol	-0.319166	0.315152	0.795519	Not Significant
MVK_PAPAN	Rejection vs 3-month protocol	-0.32013	0.412121	0.83731	Not Significant
PNP_PAPAN	Rejection vs 3-month protocol	-0.321222	0.648485	0.929755	Not Significant
IL6ST_PAPAN	Rejection vs 3-month protocol	-0.321527	0.315152	0.795519	Not Significant
ALDH8A1_PAPAN	Rejection vs 3-month protocol	-0.321731	0.648485	0.929755	Not Significant
EHD3_PAPAN	Rejection vs 3-month protocol	-0.322651	0.315152	0.795519	Not Significant
CORO7_PAPAN	Rejection vs 3-month protocol	-0.322768	0.0727273	0.608862	Not Significant
JCHAIN_PAPAN	Rejection vs 3-month protocol	-0.324814	0.787879	0.942964	Not Significant
BTD_PAPAN	Rejection vs 3-month protocol	-0.325744	0.412121	0.83731	Not Significant
PHGDH_PAPAN	Rejection vs 3-month protocol	-0.327204	0.527273	0.884629	Not Significant
ECM2_PAPAN	Rejection vs 3-month protocol	-0.327865	1	1	Not Significant
IGKC_PAPAN	Rejection vs 3-month protocol	-0.32817	0.412121	0.83731	Not Significant
C6_PAPAN	Rejection vs 3-month protocol	-0.32903	0.927273	0.983972	Not Significant
CSRP1_PAPAN	Rejection vs 3-month protocol	-0.329052	0.648485	0.929755	Not Significant
CAP1_PAPAN	Rejection vs 3-month protocol	-0.329176	0.648485	0.929755	Not Significant
C1R_PIG	Rejection vs 3-month protocol	-0.330764	0.787879	0.942964	Not Significant
CWH43_PAPAN	Rejection vs 3-month protocol	-0.331844	0.527273	0.884629	Not Significant
RNF123_PAPAN	Rejection vs 3-month protocol	-0.332109	0.315152	0.795519	Not Significant
VPS13C_PIG	Rejection vs 3-month protocol	-0.332914	0.315152	0.795519	Not Significant
IGFALS_PIG	Rejection vs 3-month protocol	-0.333052	0.527273	0.884629	Not Significant
ACAA2_PAPAN	Rejection vs 3-month protocol	-0.333531	0.527273	0.884629	Not Significant
SLC22A1_PAPAN	Rejection vs 3-month protocol	-0.334622	0.412121	0.83731	Not Significant
SOD2_PAPAN	Rejection vs 3-month protocol	-0.336523	0.787879	0.942964	Not Significant
CAT_PIG	Rejection vs 3-month protocol	-0.336637	0.648485	0.929755	Not Significant
AP3D1_PAPAN	Rejection vs 3-month protocol	-0.337068	0.00606061	0.438999	Not Significant
FN1_PAPAN	Rejection vs 3-month protocol	-0.337117	0.787879	0.942964	Not Significant
DIAPH1_PAPAN	Rejection vs 3-month protocol	-0.337692	0.230303	0.735028	Not Significant
SPTB_PAPAN	Rejection vs 3-month protocol	-0.337745	0.315152	0.795519	Not Significant
RAB8B_PAPAN	Rejection vs 3-month protocol	-0.339535	0.315152	0.795519	Not Significant
LIPG_PAPAN	Rejection vs 3-month protocol	-0.340889	0.527273	0.884629	Not Significant
RPS15_PIG	Rejection vs 3-month protocol	-0.34125	0.230303	0.735028	Not Significant
CEMIP_PAPAN	Rejection vs 3-month protocol	-0.341616	0.163636	0.706265	Not Significant
FAM83G_PAPAN	Rejection vs 3-month protocol	-0.341934	0.787879	0.942964	Not Significant
MVD_PAPAN	Rejection vs 3-month protocol	-0.344006	0.648485	0.929755	Not Significant
KRT85_PAPAN	Rejection vs 3-month protocol	-0.344174	0.412121	0.83731	Not Significant
TRO_PAPAN	Rejection vs 3-month protocol	-0.35012	0.527273	0.884629	Not Significant
RPL32_PIG	Rejection vs 3-month protocol	-0.350786	0.787879	0.942964	Not Significant
COL6A6_PAPAN	Rejection vs 3-month protocol	-0.351517	0.527273	0.884629	Not Significant
FARSA_PAPAN	Rejection vs 3-month protocol	-0.352832	0.527273	0.884629	Not Significant
LOC100517145_PIG	Rejection vs 3-month protocol	-0.353356	0.163636	0.706265	Not Significant
ANXA6_PAPAN	Rejection vs 3-month protocol	-0.354073	0.648485	0.929755	Not Significant
SMPD3_PAPAN	Rejection vs 3-month protocol	-0.354153	0.315152	0.795519	Not Significant
DPYD_PAPAN	Rejection vs 3-month protocol	-0.35448	0.527273	0.884629	Not Significant
CD109_PAPAN	Rejection vs 3-month protocol	-0.355353	0.412121	0.83731	Not Significant
LTBP1_PAPAN	Rejection vs 3-month protocol	-0.355812	0.527273	0.884629	Not Significant
NOTUM_PAPAN	Rejection vs 3-month protocol	-0.357155	0.412121	0.83731	Not Significant
LDB3_PAPAN	Rejection vs 3-month protocol	-0.35814	0.927273	0.983972	Not Significant
PBLD_PAPAN	Rejection vs 3-month protocol	-0.358586	0.648485	0.929755	Not Significant
HBZ_PAPAN	Rejection vs 3-month protocol	-0.360666	0.527273	0.884629	Not Significant
AGL_PAPAN	Rejection vs 3-month protocol	-0.361271	0.787879	0.942964	Not Significant
F12_PIG	Rejection vs 3-month protocol	-0.361389	0.230303	0.735028	Not Significant
SERPIND1_PIG	Rejection vs 3-month protocol	-0.361499	0.315152	0.795519	Not Significant
MAPK12_PAPAN	Rejection vs 3-month protocol	-0.361981	0.527273	0.884629	Not Significant
STK10_PAPAN	Rejection vs 3-month protocol	-0.362736	0.412121	0.83731	Not Significant
UGGT1_PAPAN	Rejection vs 3-month protocol	-0.364054	0.315152	0.795519	Not Significant
APOD_PAPAN	Rejection vs 3-month protocol	-0.364512	0.412121	0.83731	Not Significant
PGP_PAPAN	Rejection vs 3-month protocol	-0.364803	0.163636	0.706265	Not Significant
RUVBL2_PIG	Rejection vs 3-month protocol	-0.36491	0.230303	0.735028	Not Significant
OASL_PAPAN	Rejection vs 3-month protocol	-0.365075	0.412121	0.83731	Not Significant
RNH1_PAPAN	Rejection vs 3-month protocol	-0.365327	0.230303	0.735028	Not Significant
UROD_PAPAN	Rejection vs 3-month protocol	-0.365364	0.412121	0.83731	Not Significant
PLG_PAPAN	Rejection vs 3-month protocol	-0.365586	0.00606061	0.438999	Not Significant
ARF4_PAPAN	Rejection vs 3-month protocol	-0.365759	0.412121	0.83731	Not Significant
KRT82_PAPAN	Rejection vs 3-month protocol	-0.36592	0.412121	0.83731	Not Significant
PALLD_PAPAN	Rejection vs 3-month protocol	-0.367951	0.648485	0.929755	Not Significant
SUCLG2_PAPAN	Rejection vs 3-month protocol	-0.368519	0.527273	0.884629	Not Significant
TLN1_PAPAN	Rejection vs 3-month protocol	-0.368643	0.527273	0.884629	Not Significant
ITGAX_PAPAN	Rejection vs 3-month protocol	-0.37024	0.412121	0.83731	Not Significant
MYL1_PAPAN	Rejection vs 3-month protocol	-0.371201	0.927273	0.983972	Not Significant
CALR_PAPAN	Rejection vs 3-month protocol	-0.371201	0.927273	0.983972	Not Significant
FGR_PAPAN	Rejection vs 3-month protocol	-0.371824	0.315152	0.795519	Not Significant
FCGR3A_PAPAN	Rejection vs 3-month protocol	-0.372115	1	1	Not Significant
CD4_PAPAN	Rejection vs 3-month protocol	-0.37268	0.315152	0.795519	Not Significant
SFN_PIG	Rejection vs 3-month protocol	-0.372921	0.787879	0.942964	Not Significant
IDI1_PAPAN	Rejection vs 3-month protocol	-0.372989	0.0727273	0.608862	Not Significant
CARS2_PAPAN	Rejection vs 3-month protocol	-0.373386	0.230303	0.735028	Not Significant
NRDC_PAPAN	Rejection vs 3-month protocol	-0.374053	0.412121	0.83731	Not Significant
FECH_PAPAN	Rejection vs 3-month protocol	-0.374281	0.787879	0.942964	Not Significant
GSN_PAPAN	Rejection vs 3-month protocol	-0.374536	0.527273	0.884629	Not Significant
DAZAP1_PIG	Rejection vs 3-month protocol	-0.375001	0.787879	0.942964	Not Significant
C1R_PAPAN	Rejection vs 3-month protocol	-0.375866	0.412121	0.83731	Not Significant
ABCB6_PAPAN	Rejection vs 3-month protocol	-0.377297	0.163636	0.706265	Not Significant
LTA4H_PAPAN	Rejection vs 3-month protocol	-0.37922	0.315152	0.795519	Not Significant
LMO7_PAPAN	Rejection vs 3-month protocol	-0.380083	0.315152	0.795519	Not Significant
ICAM3_PAPAN	Rejection vs 3-month protocol	-0.381959	0.527273	0.884629	Not Significant
MANBA_PAPAN	Rejection vs 3-month protocol	-0.383879	0.315152	0.795519	Not Significant
WAS_PAPAN	Rejection vs 3-month protocol	-0.384211	0.315152	0.795519	Not Significant
SERPINA6_PAPAN	Rejection vs 3-month protocol	-0.384579	0.230303	0.735028	Not Significant
PROS1_PIG	Rejection vs 3-month protocol	-0.385681	1	1	Not Significant
PGM3_PAPAN	Rejection vs 3-month protocol	-0.386282	0.163636	0.706265	Not Significant
ATP6V1C2_PAPAN	Rejection vs 3-month protocol	-0.387901	0.230303	0.735028	Not Significant
ERAP1_PAPAN	Rejection vs 3-month protocol	-0.388156	0.648485	0.929755	Not Significant
ESYT1_PAPAN	Rejection vs 3-month protocol	-0.388738	0.315152	0.795519	Not Significant
HEXB_PAPAN	Rejection vs 3-month protocol	-0.39161	0.109091	0.660893	Not Significant
ACP7_PAPAN	Rejection vs 3-month protocol	-0.391678	0.927273	0.983972	Not Significant
NUMA1_PIG	Rejection vs 3-month protocol	-0.391904	0.315152	0.795519	Not Significant
C6orf120_PAPAN	Rejection vs 3-month protocol	-0.392437	0.230303	0.735028	Not Significant
HEBP1_PAPAN	Rejection vs 3-month protocol	-0.393236	0.230303	0.735028	Not Significant
LAMB1_PAPAN	Rejection vs 3-month protocol	-0.396319	0.787879	0.942964	Not Significant
TOLLIP_PAPAN	Rejection vs 3-month protocol	-0.396641	0.230303	0.735028	Not Significant
EPS8L1_PAPAN	Rejection vs 3-month protocol	-0.399188	0.527273	0.884629	Not Significant
RHOT2_PIG	Rejection vs 3-month protocol	-0.399244	0.163636	0.706265	Not Significant
MCAM_PAPAN	Rejection vs 3-month protocol	-0.399882	0.163636	0.706265	Not Significant
ECM1_PAPAN	Rejection vs 3-month protocol	-0.401115	0.163636	0.706265	Not Significant
ACP5_PAPAN	Rejection vs 3-month protocol	-0.401862	0.0727273	0.608862	Not Significant
ADAMDEC1_PAPAN	Rejection vs 3-month protocol	-0.402506	0.412121	0.83731	Not Significant
SLPI_PAPAN	Rejection vs 3-month protocol	-0.402844	0.412121	0.83731	Not Significant
PEPD_PAPAN	Rejection vs 3-month protocol	-0.40506	0.109091	0.660893	Not Significant
CTH_PAPAN	Rejection vs 3-month protocol	-0.405305	0.315152	0.795519	Not Significant
HSPH1_PAPAN	Rejection vs 3-month protocol	-0.40601	0.412121	0.83731	Not Significant
DDOST_PAPAN	Rejection vs 3-month protocol	-0.406506	0.412121	0.83731	Not Significant
GSDMA_PIG	Rejection vs 3-month protocol	-0.407267	0.412121	0.83731	Not Significant
MOGS_PAPAN	Rejection vs 3-month protocol	-0.408072	0.412121	0.83731	Not Significant
CTSD_PIG	Rejection vs 3-month protocol	-0.410007	0.315152	0.795519	Not Significant
RELN_PAPAN	Rejection vs 3-month protocol	-0.410699	0.315152	0.795519	Not Significant
ENTPD5_PAPAN	Rejection vs 3-month protocol	-0.41093	0.787879	0.942964	Not Significant
CD5L_PAPAN	Rejection vs 3-month protocol	-0.412036	0.787879	0.942964	Not Significant
HRG_PAPAN	Rejection vs 3-month protocol	-0.413477	0.230303	0.735028	Not Significant
IDE_PAPAN	Rejection vs 3-month protocol	-0.415674	0.648485	0.929755	Not Significant
FETUB_PAPAN	Rejection vs 3-month protocol	-0.416101	0.527273	0.884629	Not Significant
CYCS_PAPAN	Rejection vs 3-month protocol	-0.416254	0.787879	0.942964	Not Significant
SMPDL3A_PAPAN	Rejection vs 3-month protocol	-0.418121	0.230303	0.735028	Not Significant
PPBP_PAPAN	Rejection vs 3-month protocol	-0.419027	0.927273	0.983972	Not Significant
AP3B1_PAPAN	Rejection vs 3-month protocol	-0.419072	0.0727273	0.608862	Not Significant
FGG_PAPAN	Rejection vs 3-month protocol	-0.420129	0.527273	0.884629	Not Significant
LEMD2_PAPAN	Rejection vs 3-month protocol	-0.420514	0.412121	0.83731	Not Significant
ME2_PAPAN	Rejection vs 3-month protocol	-0.421085	0.648485	0.929755	Not Significant
HSPD1_PIG	Rejection vs 3-month protocol	-0.421174	0.315152	0.795519	Not Significant
A1BG_PIG	Rejection vs 3-month protocol	-0.423076	0.315152	0.795519	Not Significant
MAN2A1_PIG	Rejection vs 3-month protocol	-0.423932	0.787879	0.942964	Not Significant
SPINK1_PAPAN	Rejection vs 3-month protocol	-0.424055	0.787879	0.942964	Not Significant
ADIPOQ_PAPAN	Rejection vs 3-month protocol	-0.424196	0.163636	0.706265	Not Significant
TREH_PAPAN	Rejection vs 3-month protocol	-0.424298	0.927273	0.983972	Not Significant
PPL_PAPAN	Rejection vs 3-month protocol	-0.425447	0.163636	0.706265	Not Significant
LMNB1_PAPAN	Rejection vs 3-month protocol	-0.428789	0.315152	0.795519	Not Significant
PCYOX1_PAPAN	Rejection vs 3-month protocol	-0.431246	0.527273	0.884629	Not Significant
LOC106510200_PIG	Rejection vs 3-month protocol	-0.431537	0.787879	0.942964	Not Significant
ALDOC_PAPAN	Rejection vs 3-month protocol	-0.43163	0.315152	0.795519	Not Significant
CTSF_PAPAN	Rejection vs 3-month protocol	-0.43322	0.315152	0.795519	Not Significant
SERPINF2_PAPAN	Rejection vs 3-month protocol	-0.434296	0.0424242	0.523547	Not Significant
PPP2R4_PAPAN	Rejection vs 3-month protocol	-0.434565	0.412121	0.83731	Not Significant
SNAP23_PAPAN	Rejection vs 3-month protocol	-0.434565	0.527273	0.884629	Not Significant
GLOD4_PAPAN	Rejection vs 3-month protocol	-0.435214	0.787879	0.942964	Not Significant
EIF2AK2_PAPAN	Rejection vs 3-month protocol	-0.435554	0.230303	0.735028	Not Significant
FAM114A1_PAPAN	Rejection vs 3-month protocol	-0.43569	0.0424242	0.523547	Not Significant
SEMA4B_PIG	Rejection vs 3-month protocol	-0.435936	0.527273	0.884629	Not Significant
ERMAP_PAPAN	Rejection vs 3-month protocol	-0.437291	0.787879	0.942964	Not Significant
RARS1_PAPAN	Rejection vs 3-month protocol	-0.441228	0.648485	0.929755	Not Significant
ACADVL_PAPAN	Rejection vs 3-month protocol	-0.44212	0.230303	0.735028	Not Significant
ERO1A_PAPAN	Rejection vs 3-month protocol	-0.442248	0.648485	0.929755	Not Significant
GSR_PAPAN	Rejection vs 3-month protocol	-0.445368	0.648485	0.929755	Not Significant
VMO1_PAPAN	Rejection vs 3-month protocol	-0.447278	0.315152	0.795519	Not Significant
SERPINC1_PAPAN	Rejection vs 3-month protocol	-0.447463	0.0424242	0.523547	Not Significant
MGAT1_PIG	Rejection vs 3-month protocol	-0.449138	0.315152	0.795519	Not Significant
SERPINA4_PAPAN	Rejection vs 3-month protocol	-0.449462	0.0727273	0.608862	Not Significant
BST1_PAPAN	Rejection vs 3-month protocol	-0.450971	0.230303	0.735028	Not Significant
F13A1_PAPAN	Rejection vs 3-month protocol	-0.451063	0.412121	0.83731	Not Significant
CD8A_PAPAN	Rejection vs 3-month protocol	-0.451991	0.315152	0.795519	Not Significant
RALBP1_PAPAN	Rejection vs 3-month protocol	-0.452156	0.648485	0.929755	Not Significant
TFRC_PAPAN	Rejection vs 3-month protocol	-0.457082	0.648485	0.929755	Not Significant
FERMT1_PAPAN	Rejection vs 3-month protocol	-0.457301	0.412121	0.83731	Not Significant
TNC_PAPAN	Rejection vs 3-month protocol	-0.457627	0.230303	0.735028	Not Significant
CTSB_PAPAN	Rejection vs 3-month protocol	-0.457818	0.315152	0.795519	Not Significant
WNK1_PAPAN	Rejection vs 3-month protocol	-0.458585	0.163636	0.706265	Not Significant
C5_PAPAN	Rejection vs 3-month protocol	-0.459245	0.0424242	0.523547	Not Significant
KNG1_PAPAN	Rejection vs 3-month protocol	-0.460498	0.315152	0.795519	Not Significant
SPARCL1_PAPAN	Rejection vs 3-month protocol	-0.461138	0.230303	0.735028	Not Significant
IHH_PAPAN	Rejection vs 3-month protocol	-0.462139	0.109091	0.660893	Not Significant
EPHA1_PAPAN	Rejection vs 3-month protocol	-0.463521	0.163636	0.706265	Not Significant
VASN_PAPAN	Rejection vs 3-month protocol	-0.463889	0.0727273	0.608862	Not Significant
HGFAC_PAPAN	Rejection vs 3-month protocol	-0.466785	0.648485	0.929755	Not Significant
FGB_PAPAN	Rejection vs 3-month protocol	-0.467662	0.230303	0.735028	Not Significant
CP_PAPAN	Rejection vs 3-month protocol	-0.468353	0.109091	0.660893	Not Significant
QPCT_PAPAN	Rejection vs 3-month protocol	-0.469604	0.163636	0.706265	Not Significant
TXNDC5_PAPAN	Rejection vs 3-month protocol	-0.471117	0.648485	0.929755	Not Significant
TMEM132C_PAPAN	Rejection vs 3-month protocol	-0.471671	0.230303	0.735028	Not Significant
APOA1_PIG	Rejection vs 3-month protocol	-0.472609	0.648485	0.929755	Not Significant
PITRM1_PAPAN	Rejection vs 3-month protocol	-0.473298	0.648485	0.929755	Not Significant
ENG_PAPAN	Rejection vs 3-month protocol	-0.475078	0.0727273	0.608862	Not Significant
F8_PAPAN	Rejection vs 3-month protocol	-0.476412	0.109091	0.660893	Not Significant
CFP_PAPAN	Rejection vs 3-month protocol	-0.47675	0.315152	0.795519	Not Significant
EZR_PAPAN	Rejection vs 3-month protocol	-0.477186	0.412121	0.83731	Not Significant
F2_PAPAN	Rejection vs 3-month protocol	-0.480309	0.0727273	0.608862	Not Significant
RBM8A_PIG	Rejection vs 3-month protocol	-0.48099	0.527273	0.884629	Not Significant
GANAB_PAPAN	Rejection vs 3-month protocol	-0.4833	0.0424242	0.523547	Not Significant
PLEKHO2_PAPAN	Rejection vs 3-month protocol	-0.483351	0.412121	0.83731	Not Significant
SQSTM1_PAPAN	Rejection vs 3-month protocol	-0.483804	0.315152	0.795519	Not Significant
ZYX_PAPAN	Rejection vs 3-month protocol	-0.483865	0.648485	0.929755	Not Significant
FGA_PIG	Rejection vs 3-month protocol	-0.484537	0.412121	0.83731	Not Significant
MYO5B_PAPAN	Rejection vs 3-month protocol	-0.486055	0.315152	0.795519	Not Significant
GNA15_PAPAN	Rejection vs 3-month protocol	-0.487454	0.230303	0.735028	Not Significant
SHPK_PAPAN	Rejection vs 3-month protocol	-0.488016	0.412121	0.83731	Not Significant
TRIM29_PAPAN	Rejection vs 3-month protocol	-0.488629	0.527273	0.884629	Not Significant
PREP_PAPAN	Rejection vs 3-month protocol	-0.488807	0.527273	0.884629	Not Significant
FBLN1_PAPAN	Rejection vs 3-month protocol	-0.488847	0.230303	0.735028	Not Significant
CKAP5_PAPAN	Rejection vs 3-month protocol	-0.490251	0.230303	0.735028	Not Significant
FHOD1_PAPAN	Rejection vs 3-month protocol	-0.491003	0.412121	0.83731	Not Significant
SPTBN2_PAPAN	Rejection vs 3-month protocol	-0.492592	0.527273	0.884629	Not Significant
AKR7A2_PAPAN	Rejection vs 3-month protocol	-0.494766	0.787879	0.942964	Not Significant
HEXA_PAPAN	Rejection vs 3-month protocol	-0.495054	0.230303	0.735028	Not Significant
ITIH1_PAPAN	Rejection vs 3-month protocol	-0.496248	0.0242424	0.475152	Not Significant
LETM1_PAPAN	Rejection vs 3-month protocol	-0.496511	0.412121	0.83731	Not Significant
NHERF2_PAPAN	Rejection vs 3-month protocol	-0.499103	0.230303	0.735028	Not Significant
APOBR_PAPAN	Rejection vs 3-month protocol	-0.499418	0.648485	0.929755	Not Significant
VASP_PAPAN	Rejection vs 3-month protocol	-0.499841	0.315152	0.795519	Not Significant
CILP2_PAPAN	Rejection vs 3-month protocol	-0.500206	0.527273	0.884629	Not Significant
TGFBR3_PAPAN	Rejection vs 3-month protocol	-0.500663	0.230303	0.735028	Not Significant
EIF4G1_PAPAN	Rejection vs 3-month protocol	-0.501937	0.230303	0.735028	Not Significant
CLEC3B_PIG	Rejection vs 3-month protocol	-0.502838	0.412121	0.83731	Not Significant
BAIAP2_PAPAN	Rejection vs 3-month protocol	-0.50362	0.230303	0.735028	Not Significant
HMCN1_PAPAN	Rejection vs 3-month protocol	-0.505053	0.0727273	0.608862	Not Significant
BCL2L13_PAPAN	Rejection vs 3-month protocol	-0.505484	0.648485	0.929755	Not Significant
MYH14_PIG	Rejection vs 3-month protocol	-0.505736	0.0727273	0.608862	Not Significant
SNRPF_PIG	Rejection vs 3-month protocol	-0.50577	0.412121	0.83731	Not Significant
GP9_PAPAN	Rejection vs 3-month protocol	-0.506959	0.230303	0.735028	Not Significant
CTNNA1_PAPAN	Rejection vs 3-month protocol	-0.507427	0.315152	0.795519	Not Significant
SPINK5_PAPAN	Rejection vs 3-month protocol	-0.507987	0.648485	0.929755	Not Significant
GLUD1_PAPAN	Rejection vs 3-month protocol	-0.508154	0.787879	0.942964	Not Significant
CPT2_PAPAN	Rejection vs 3-month protocol	-0.50968	0.0727273	0.608862	Not Significant
C8B_PAPAN	Rejection vs 3-month protocol	-0.509855	0.109091	0.660893	Not Significant
ALB_PAPAN	Rejection vs 3-month protocol	-0.510688	0.230303	0.735028	Not Significant
ALAD_PAPAN	Rejection vs 3-month protocol	-0.511172	0.163636	0.706265	Not Significant
SERPINA1_PIG	Rejection vs 3-month protocol	-0.513492	0.230303	0.735028	Not Significant
SYNE2_PAPAN	Rejection vs 3-month protocol	-0.513643	0.230303	0.735028	Not Significant
SDCBP_PAPAN	Rejection vs 3-month protocol	-0.514206	0.109091	0.660893	Not Significant
APOBEC2_PAPAN	Rejection vs 3-month protocol	-0.514271	0.315152	0.795519	Not Significant
F10_PAPAN	Rejection vs 3-month protocol	-0.517554	0.230303	0.735028	Not Significant
SAMD9_PAPAN	Rejection vs 3-month protocol	-0.518589	0.412121	0.83731	Not Significant
CLC_PAPAN	Rejection vs 3-month protocol	-0.518628	0.927273	0.983972	Not Significant
TSKU_PAPAN	Rejection vs 3-month protocol	-0.518863	0.527273	0.884629	Not Significant
CRISP2_PAPAN	Rejection vs 3-month protocol	-0.520552	0.527273	0.884629	Not Significant
HAO1_PAPAN	Rejection vs 3-month protocol	-0.52079	0.527273	0.884629	Not Significant
ANGPTL4_PAPAN	Rejection vs 3-month protocol	-0.521466	0.0727273	0.608862	Not Significant
GSTP1_PAPAN	Rejection vs 3-month protocol	-0.523287	0.527273	0.884629	Not Significant
RNF39_PAPAN	Rejection vs 3-month protocol	-0.5234	0.230303	0.735028	Not Significant
CTSC_PAPAN	Rejection vs 3-month protocol	-0.52418	0.230303	0.735028	Not Significant
VAT1_PAPAN	Rejection vs 3-month protocol	-0.524351	0.315152	0.795519	Not Significant
RPL27A_PIG	Rejection vs 3-month protocol	-0.524435	0.315152	0.795519	Not Significant
B4GALT1_PAPAN	Rejection vs 3-month protocol	-0.526356	0.0242424	0.475152	Not Significant
AFDN_PAPAN	Rejection vs 3-month protocol	-0.527246	0.648485	0.929755	Not Significant
AGT_PIG	Rejection vs 3-month protocol	-0.528087	0.412121	0.83731	Not Significant
LAMA3_PAPAN	Rejection vs 3-month protocol	-0.534361	0.315152	0.795519	Not Significant
ANXA4_PAPAN	Rejection vs 3-month protocol	-0.535313	0.315152	0.795519	Not Significant
ROBO4_PAPAN	Rejection vs 3-month protocol	-0.535688	0.109091	0.660893	Not Significant
LOC100522401_PIG	Rejection vs 3-month protocol	-0.539523	0.412121	0.83731	Not Significant
PLGRKT_PAPAN	Rejection vs 3-month protocol	-0.541747	0.163636	0.706265	Not Significant
PCCA_PAPAN	Rejection vs 3-month protocol	-0.543712	0.648485	0.929755	Not Significant
GEMIN5_PAPAN	Rejection vs 3-month protocol	-0.544457	0.315152	0.795519	Not Significant
VTN_PIG	Rejection vs 3-month protocol	-0.54513	0.109091	0.660893	Not Significant
SERPINB1_PAPAN	Rejection vs 3-month protocol	-0.546381	0.412121	0.83731	Not Significant
RPL15_PIG	Rejection vs 3-month protocol	-0.547433	0.412121	0.83731	Not Significant
PLEC_PIG	Rejection vs 3-month protocol	-0.549927	0.109091	0.660893	Not Significant
PTK7_PAPAN	Rejection vs 3-month protocol	-0.550233	0.109091	0.660893	Not Significant
EIF2B4_PAPAN	Rejection vs 3-month protocol	-0.550932	0.163636	0.706265	Not Significant
IGFALS_PAPAN	Rejection vs 3-month protocol	-0.551739	0.315152	0.795519	Not Significant
VNN2_PAPAN	Rejection vs 3-month protocol	-0.552707	0.0242424	0.475152	Not Significant
ANGPTL6_PAPAN	Rejection vs 3-month protocol	-0.552935	0.230303	0.735028	Not Significant
FLNC_PAPAN	Rejection vs 3-month protocol	-0.554254	0.315152	0.795519	Not Significant
VCAM1_PAPAN	Rejection vs 3-month protocol	-0.554531	0.0727273	0.608862	Not Significant
BTN2A1_PAPAN	Rejection vs 3-month protocol	-0.55539	0.315152	0.795519	Not Significant
CD99_PAPAN	Rejection vs 3-month protocol	-0.556828	0.163636	0.706265	Not Significant
PKM_PAPAN	Rejection vs 3-month protocol	-0.557177	0.927273	0.983972	Not Significant
MASP1_PAPAN	Rejection vs 3-month protocol	-0.558711	0.00606061	0.438999	Not Significant
GP1BA_PAPAN	Rejection vs 3-month protocol	-0.560771	0.163636	0.706265	Not Significant
UBA6_PAPAN	Rejection vs 3-month protocol	-0.561924	0.648485	0.929755	Not Significant
FGB_PIG	Rejection vs 3-month protocol	-0.562227	0.230303	0.735028	Not Significant
PPM1F_PAPAN	Rejection vs 3-month protocol	-0.563142	0.0242424	0.475152	Not Significant
ACADM_PAPAN	Rejection vs 3-month protocol	-0.563203	0.230303	0.735028	Not Significant
SRSF1_PIG	Rejection vs 3-month protocol	-0.563682	0.0242424	0.475152	Not Significant
NPNT_PAPAN	Rejection vs 3-month protocol	-0.563722	0.527273	0.884629	Not Significant
PEF1_PIG	Rejection vs 3-month protocol	-0.563881	0.163636	0.706265	Not Significant
OAF_PAPAN	Rejection vs 3-month protocol	-0.565268	0.109091	0.660893	Not Significant
DERA_PAPAN	Rejection vs 3-month protocol	-0.566757	0.163636	0.706265	Not Significant
CTSZ_PAPAN	Rejection vs 3-month protocol	-0.567053	0.109091	0.660893	Not Significant
PRCP_PAPAN	Rejection vs 3-month protocol	-0.569814	0.0242424	0.475152	Not Significant
IGLV3-10_PAPAN	Rejection vs 3-month protocol	-0.571045	0.315152	0.795519	Not Significant
ASPH_PAPAN	Rejection vs 3-month protocol	-0.572729	0.109091	0.660893	Not Significant
APOA2_PAPAN	Rejection vs 3-month protocol	-0.573139	0.412121	0.83731	Not Significant
FBP1_PIG	Rejection vs 3-month protocol	-0.574459	0.315152	0.795519	Not Significant
CD14_PAPAN	Rejection vs 3-month protocol	-0.574884	0.315152	0.795519	Not Significant
FUOM_PAPAN	Rejection vs 3-month protocol	-0.575744	0.527273	0.884629	Not Significant
RAB3GAP2_PAPAN	Rejection vs 3-month protocol	-0.576409	0.230303	0.735028	Not Significant
PAPLN_PAPAN	Rejection vs 3-month protocol	-0.577878	0.0242424	0.475152	Not Significant
MGLL_PAPAN	Rejection vs 3-month protocol	-0.580722	0.109091	0.660893	Not Significant
NLRX1_PAPAN	Rejection vs 3-month protocol	-0.581222	0.787879	0.942964	Not Significant
IGKV4-1_PAPAN	Rejection vs 3-month protocol	-0.58246	0.230303	0.735028	Not Significant
HPSE_PAPAN	Rejection vs 3-month protocol	-0.583287	0.315152	0.795519	Not Significant
PDCD6_PIG	Rejection vs 3-month protocol	-0.58346	0.163636	0.706265	Not Significant
RRP12_PAPAN	Rejection vs 3-month protocol	-0.584863	0.527273	0.884629	Not Significant
AKAP12_PAPAN	Rejection vs 3-month protocol	-0.586314	0.230303	0.735028	Not Significant
RIPOR3_PAPAN	Rejection vs 3-month protocol	-0.586967	0.0424242	0.523547	Not Significant
IGF2R_PAPAN	Rejection vs 3-month protocol	-0.587422	0.163636	0.706265	Not Significant
CAPN2_PAPAN	Rejection vs 3-month protocol	-0.587757	0.109091	0.660893	Not Significant
MAN1A1_PAPAN	Rejection vs 3-month protocol	-0.589892	0.315152	0.795519	Not Significant
PTK6_PAPAN	Rejection vs 3-month protocol	-0.590288	0.0242424	0.475152	Not Significant
CLEC3B_PAPAN	Rejection vs 3-month protocol	-0.591852	0.0727273	0.608862	Not Significant
HADHB_PAPAN	Rejection vs 3-month protocol	-0.594861	0.230303	0.735028	Not Significant
MMP10_PAPAN	Rejection vs 3-month protocol	-0.595283	0.927273	0.983972	Not Significant
D2HGDH_PAPAN	Rejection vs 3-month protocol	-0.5954	0.0424242	0.523547	Not Significant
TXNRD1_PAPAN	Rejection vs 3-month protocol	-0.596147	0.527273	0.884629	Not Significant
SFTPB_PAPAN	Rejection vs 3-month protocol	-0.596733	0.163636	0.706265	Not Significant
CRTAC1_PAPAN	Rejection vs 3-month protocol	-0.59756	0.163636	0.706265	Not Significant
SERPIND1_PAPAN	Rejection vs 3-month protocol	-0.600366	0.0424242	0.523547	Not Significant
GOT2_PAPAN	Rejection vs 3-month protocol	-0.602292	0.230303	0.735028	Not Significant
PGLYRP1_PAPAN	Rejection vs 3-month protocol	-0.604857	0.315152	0.795519	Not Significant
CHIT1_PAPAN	Rejection vs 3-month protocol	-0.605771	0.163636	0.706265	Not Significant
TNFSF13_PAPAN	Rejection vs 3-month protocol	-0.606612	0.927273	0.983972	Not Significant
COL12A1_PAPAN	Rejection vs 3-month protocol	-0.607187	0.230303	0.735028	Not Significant
CPN1_PAPAN	Rejection vs 3-month protocol	-0.612395	0.315152	0.795519	Not Significant
OGN_PAPAN	Rejection vs 3-month protocol	-0.612397	0.163636	0.706265	Not Significant
APCS_PAPAN	Rejection vs 3-month protocol	-0.613093	0.527273	0.884629	Not Significant
CR2_PAPAN	Rejection vs 3-month protocol	-0.613229	0.787879	0.942964	Not Significant
IGDCC4_PAPAN	Rejection vs 3-month protocol	-0.613539	0.527273	0.884629	Not Significant
TWF2_PAPAN	Rejection vs 3-month protocol	-0.614104	0.0727273	0.608862	Not Significant
DPP4_PAPAN	Rejection vs 3-month protocol	-0.614992	0.109091	0.660893	Not Significant
CBR3_PAPAN	Rejection vs 3-month protocol	-0.617095	0.230303	0.735028	Not Significant
HMCN2_PAPAN	Rejection vs 3-month protocol	-0.617656	0.163636	0.706265	Not Significant
HRG_PIG	Rejection vs 3-month protocol	-0.618424	0.230303	0.735028	Not Significant
SYK_PAPAN	Rejection vs 3-month protocol	-0.621572	0.0727273	0.608862	Not Significant
POF1B_PAPAN	Rejection vs 3-month protocol	-0.62592	0.412121	0.83731	Not Significant
AOC3_PAPAN	Rejection vs 3-month protocol	-0.628716	0.0424242	0.523547	Not Significant
SWAP70_PAPAN	Rejection vs 3-month protocol	-0.6291	0.0424242	0.523547	Not Significant
LCN2_PAPAN	Rejection vs 3-month protocol	-0.629331	0.648485	0.929755	Not Significant
SERPINA7_PAPAN	Rejection vs 3-month protocol	-0.629712	0.163636	0.706265	Not Significant
PFAS_PAPAN	Rejection vs 3-month protocol	-0.629732	0.315152	0.795519	Not Significant
IL1RAP_PAPAN	Rejection vs 3-month protocol	-0.630009	0.412121	0.83731	Not Significant
CHGA_PAPAN	Rejection vs 3-month protocol	-0.633554	0.648485	0.929755	Not Significant
C4A_PIG	Rejection vs 3-month protocol	-0.633726	0.230303	0.735028	Not Significant
FBLN1_PIG	Rejection vs 3-month protocol	-0.634268	0.648485	0.929755	Not Significant
SERPINA1_PAPAN	Rejection vs 3-month protocol	-0.635757	0.109091	0.660893	Not Significant
NHERF1_PAPAN	Rejection vs 3-month protocol	-0.638929	0.230303	0.735028	Not Significant
ERAP2_PAPAN	Rejection vs 3-month protocol	-0.640517	0.163636	0.706265	Not Significant
ARHGAP45_PIG	Rejection vs 3-month protocol	-0.640739	0.163636	0.706265	Not Significant
GSS_PAPAN	Rejection vs 3-month protocol	-0.640886	0.163636	0.706265	Not Significant
F9_PAPAN	Rejection vs 3-month protocol	-0.64125	0.230303	0.735028	Not Significant
LAMB2_PAPAN	Rejection vs 3-month protocol	-0.641306	0.315152	0.795519	Not Significant
EXTL2_PAPAN	Rejection vs 3-month protocol	-0.641489	0.163636	0.706265	Not Significant
PLG_PIG	Rejection vs 3-month protocol	-0.642249	0.315152	0.795519	Not Significant
HYAL3_PAPAN	Rejection vs 3-month protocol	-0.642335	0.0424242	0.523547	Not Significant
IQGAP2_PAPAN	Rejection vs 3-month protocol	-0.643231	0.109091	0.660893	Not Significant
SERPINA3_PAPAN	Rejection vs 3-month protocol	-0.647386	0.315152	0.795519	Not Significant
MYO1B_PAPAN	Rejection vs 3-month protocol	-0.647509	0.230303	0.735028	Not Significant
RBP4_PAPAN	Rejection vs 3-month protocol	-0.648622	0.230303	0.735028	Not Significant
AZGP1_PAPAN	Rejection vs 3-month protocol	-0.650157	0.230303	0.735028	Not Significant
TTR_PAPAN	Rejection vs 3-month protocol	-0.650211	0.230303	0.735028	Not Significant
PARVB_PAPAN	Rejection vs 3-month protocol	-0.650669	0.109091	0.660893	Not Significant
ITIH2_PAPAN	Rejection vs 3-month protocol	-0.653986	0.0242424	0.475152	Not Significant
CAPZA1_PAPAN	Rejection vs 3-month protocol	-0.655468	0.0424242	0.523547	Not Significant
EML2_PAPAN	Rejection vs 3-month protocol	-0.656878	0.0424242	0.523547	Not Significant
EXT2_PAPAN	Rejection vs 3-month protocol	-0.65729	0.0242424	0.475152	Not Significant
DHRS9_PAPAN	Rejection vs 3-month protocol	-0.657551	0.163636	0.706265	Not Significant
PON1_PAPAN	Rejection vs 3-month protocol	-0.659067	0.412121	0.83731	Not Significant
LOC100302368_PIG	Rejection vs 3-month protocol	-0.660279	0.0121212	0.475152	Not Significant
CALML3_PAPAN	Rejection vs 3-month protocol	-0.661015	0.0242424	0.475152	Not Significant
RANBP2_PAPAN	Rejection vs 3-month protocol	-0.661366	0.0727273	0.608862	Not Significant
EVI2B_PAPAN	Rejection vs 3-month protocol	-0.662434	0.230303	0.735028	Not Significant
PKP1_PAPAN	Rejection vs 3-month protocol	-0.663912	0.0727273	0.608862	Not Significant
APMAP_PAPAN	Rejection vs 3-month protocol	-0.666273	0.527273	0.884629	Not Significant
GLB1_PAPAN	Rejection vs 3-month protocol	-0.667931	0.230303	0.735028	Not Significant
TAGLN2_PIG	Rejection vs 3-month protocol	-0.668236	0.0424242	0.523547	Not Significant
CBS_PAPAN	Rejection vs 3-month protocol	-0.668703	0.412121	0.83731	Not Significant
F5_PAPAN	Rejection vs 3-month protocol	-0.669259	0.0727273	0.608862	Not Significant
LMNB2_PAPAN	Rejection vs 3-month protocol	-0.67148	0.412121	0.83731	Not Significant
RNPEP_PIG	Rejection vs 3-month protocol	-0.67453	0.0121212	0.475152	Not Significant
PSMD6_PAPAN	Rejection vs 3-month protocol	-0.677611	0.315152	0.795519	Not Significant
FLII_PAPAN	Rejection vs 3-month protocol	-0.677969	0.0727273	0.608862	Not Significant
IGHM_PAPAN	Rejection vs 3-month protocol	-0.678272	0.527273	0.884629	Not Significant
PLTP_PAPAN	Rejection vs 3-month protocol	-0.678557	0.0727273	0.608862	Not Significant
HYAL2_PAPAN	Rejection vs 3-month protocol	-0.679362	0.0242424	0.475152	Not Significant
LAMC2_PAPAN	Rejection vs 3-month protocol	-0.681917	0.0727273	0.608862	Not Significant
PFKL_PAPAN	Rejection vs 3-month protocol	-0.682868	0.0242424	0.475152	Not Significant
CRYBG2_PAPAN	Rejection vs 3-month protocol	-0.683063	0.230303	0.735028	Not Significant
SPP2_PAPAN	Rejection vs 3-month protocol	-0.683448	0.648485	0.929755	Not Significant
STARD5_PAPAN	Rejection vs 3-month protocol	-0.684389	0.230303	0.735028	Not Significant
CHGB_PAPAN	Rejection vs 3-month protocol	-0.687215	0.109091	0.660893	Not Significant
CD93_PAPAN	Rejection vs 3-month protocol	-0.688387	0.163636	0.706265	Not Significant
TGFB1_PAPAN	Rejection vs 3-month protocol	-0.690305	0.163636	0.706265	Not Significant
LOXL1_PAPAN	Rejection vs 3-month protocol	-0.693258	0.412121	0.83731	Not Significant
GYS1_PIG	Rejection vs 3-month protocol	-0.696534	0.527273	0.884629	Not Significant
APOA4_PAPAN	Rejection vs 3-month protocol	-0.698402	0.315152	0.795519	Not Significant
DSG3_PAPAN	Rejection vs 3-month protocol	-0.698872	0.0727273	0.608862	Not Significant
NCF1_PAPAN	Rejection vs 3-month protocol	-0.699999	0.527273	0.884629	Not Significant
AMBP_PAPAN	Rejection vs 3-month protocol	-0.701613	0.0727273	0.608862	Not Significant
PGLYRP2_PAPAN	Rejection vs 3-month protocol	-0.70247	0.0727273	0.608862	Not Significant
CSAD_PAPAN	Rejection vs 3-month protocol	-0.702604	0.163636	0.706265	Not Significant
MASP2_PAPAN	Rejection vs 3-month protocol	-0.703296	0.109091	0.660893	Not Significant
TPRG1_PAPAN	Rejection vs 3-month protocol	-0.70394	0.0424242	0.523547	Not Significant
IL36RN_PAPAN	Rejection vs 3-month protocol	-0.70403	0.230303	0.735028	Not Significant
GOLGA2_PAPAN	Rejection vs 3-month protocol	-0.709565	0.315152	0.795519	Not Significant
RPL5_PAPAN	Rejection vs 3-month protocol	-0.710171	0.0424242	0.523547	Not Significant
NDUFS7_PIG	Rejection vs 3-month protocol	-0.711624	0.109091	0.660893	Not Significant
LGALS3_PAPAN	Rejection vs 3-month protocol	-0.712722	0.00606061	0.438999	Not Significant
EGFR_PAPAN	Rejection vs 3-month protocol	-0.714325	0.0727273	0.608862	Not Significant
ORM1_PAPAN	Rejection vs 3-month protocol	-0.71571	0.315152	0.795519	Not Significant
EIF4H_PIG	Rejection vs 3-month protocol	-0.715821	0.00606061	0.438999	Not Significant
MMRN2_PAPAN	Rejection vs 3-month protocol	-0.71591	0.230303	0.735028	Not Significant
MRPL19_PAPAN	Rejection vs 3-month protocol	-0.71699	0.109091	0.660893	Not Significant
GCKR_PAPAN	Rejection vs 3-month protocol	-0.717178	0.163636	0.706265	Not Significant
CFHR5_PAPAN	Rejection vs 3-month protocol	-0.718701	0.527273	0.884629	Not Significant
PSMB10_PAPAN	Rejection vs 3-month protocol	-0.723139	0.527273	0.884629	Not Significant
ENPP1_PAPAN	Rejection vs 3-month protocol	-0.724035	0.0424242	0.523547	Not Significant
GPX3_PAPAN	Rejection vs 3-month protocol	-0.724242	0.163636	0.706265	Not Significant
DMGDH_PAPAN	Rejection vs 3-month protocol	-0.724634	0.163636	0.706265	Not Significant
F7_PAPAN	Rejection vs 3-month protocol	-0.724654	0.163636	0.706265	Not Significant
VNN1_PAPAN	Rejection vs 3-month protocol	-0.728503	0.109091	0.660893	Not Significant
HMGCS1_PAPAN	Rejection vs 3-month protocol	-0.731556	0.0242424	0.475152	Not Significant
CD81_PAPAN	Rejection vs 3-month protocol	-0.734959	0.0727273	0.608862	Not Significant
PTPRB_PAPAN	Rejection vs 3-month protocol	-0.739491	0.109091	0.660893	Not Significant
OMD_PAPAN	Rejection vs 3-month protocol	-0.739651	0.0424242	0.523547	Not Significant
PDAP1_PIG	Rejection vs 3-month protocol	-0.740325	0.0242424	0.475152	Not Significant
MAN2B1_PAPAN	Rejection vs 3-month protocol	-0.741902	0.163636	0.706265	Not Significant
UGT3A1_PAPAN	Rejection vs 3-month protocol	-0.743686	0.230303	0.735028	Not Significant
SAMD14_PAPAN	Rejection vs 3-month protocol	-0.746882	0.163636	0.706265	Not Significant
APOC3_PAPAN	Rejection vs 3-month protocol	-0.746943	0.527273	0.884629	Not Significant
ADAMTS13_PAPAN	Rejection vs 3-month protocol	-0.748254	0.163636	0.706265	Not Significant
ACSL1_PAPAN	Rejection vs 3-month protocol	-0.748285	0.527273	0.884629	Not Significant
SSC5D_PAPAN	Rejection vs 3-month protocol	-0.748329	0.230303	0.735028	Not Significant
KIAA0513_PAPAN	Rejection vs 3-month protocol	-0.749045	0.0424242	0.523547	Not Significant
GGT5_PAPAN	Rejection vs 3-month protocol	-0.750159	0.109091	0.660893	Not Significant
SPAG9_PAPAN	Rejection vs 3-month protocol	-0.752938	0.412121	0.83731	Not Significant
P4HB_PAPAN	Rejection vs 3-month protocol	-0.753686	0.0242424	0.475152	Not Significant
PGM5_PAPAN	Rejection vs 3-month protocol	-0.754888	0.163636	0.706265	Not Significant
C1orf116_PAPAN	Rejection vs 3-month protocol	-0.757726	0.00606061	0.438999	Not Significant
FCGBP_PIG	Rejection vs 3-month protocol	-0.758563	0.0727273	0.608862	Not Significant
KLKB1_PAPAN	Rejection vs 3-month protocol	-0.760885	0.0242424	0.475152	Not Significant
LOC110261685_PIG	Rejection vs 3-month protocol	-0.76307	0.163636	0.706265	Not Significant
CD55_PAPAN	Rejection vs 3-month protocol	-0.764045	0.0424242	0.523547	Not Significant
APOC2_PAPAN	Rejection vs 3-month protocol	-0.765191	0.163636	0.706265	Not Significant
NAP1L4_PAPAN	Rejection vs 3-month protocol	-0.767132	0.0424242	0.523547	Not Significant
TF_PAPAN	Rejection vs 3-month protocol	-0.768248	0.109091	0.660893	Not Significant
TGM2_PAPAN	Rejection vs 3-month protocol	-0.769137	0.0727273	0.608862	Not Significant
LCAT_PAPAN	Rejection vs 3-month protocol	-0.773503	0.230303	0.735028	Not Significant
FHL1_PIG	Rejection vs 3-month protocol	-0.774151	0.315152	0.795519	Not Significant
RPS15A_PIG	Rejection vs 3-month protocol	-0.776497	0.0424242	0.523547	Not Significant
LRRC47_PAPAN	Rejection vs 3-month protocol	-0.778677	0.163636	0.706265	Not Significant
IFIT1B_PAPAN	Rejection vs 3-month protocol	-0.779261	0.0727273	0.608862	Not Significant
KRT40_PAPAN	Rejection vs 3-month protocol	-0.779879	0.163636	0.706265	Not Significant
A2M_PIG	Rejection vs 3-month protocol	-0.783358	0.00606061	0.438999	Not Significant
ICAM4_PAPAN	Rejection vs 3-month protocol	-0.784544	0.0727273	0.608862	Not Significant
KRT23_PAPAN	Rejection vs 3-month protocol	-0.784567	0.0727273	0.608862	Not Significant
AFM_PAPAN	Rejection vs 3-month protocol	-0.787429	0.315152	0.795519	Not Significant
UBE2O_PAPAN	Rejection vs 3-month protocol	-0.790619	0.00606061	0.438999	Not Significant
SAA4_PAPAN	Rejection vs 3-month protocol	-0.791629	0.163636	0.706265	Not Significant
PTGS1_PAPAN	Rejection vs 3-month protocol	-0.79221	0.315152	0.795519	Not Significant
APOL1_PAPAN	Rejection vs 3-month protocol	-0.796583	0.527273	0.884629	Not Significant
B4GALNT1_PAPAN	Rejection vs 3-month protocol	-0.798501	0.163636	0.706265	Not Significant
ARPC5_PAPAN	Rejection vs 3-month protocol	-0.799706	0.109091	0.660893	Not Significant
KLK5_PAPAN	Rejection vs 3-month protocol	-0.803274	0.315152	0.795519	Not Significant
MEGF8_PAPAN	Rejection vs 3-month protocol	-0.805386	0.0727273	0.608862	Not Significant
MYH2_PAPAN	Rejection vs 3-month protocol	-0.805702	0.0424242	0.523547	Not Significant
LOC100523213_PIG	Rejection vs 3-month protocol	-0.807244	0.527273	0.884629	Not Significant
PCSK9_PAPAN	Rejection vs 3-month protocol	-0.808351	0.109091	0.660893	Not Significant
ACE_PAPAN	Rejection vs 3-month protocol	-0.809441	0.230303	0.735028	Not Significant
TTC38_PAPAN	Rejection vs 3-month protocol	-0.811569	0.0242424	0.475152	Not Significant
IMPA2_PAPAN	Rejection vs 3-month protocol	-0.812698	0.230303	0.735028	Not Significant
DLST_PAPAN	Rejection vs 3-month protocol	-0.815985	0.230303	0.735028	Not Significant
C8A_PAPAN	Rejection vs 3-month protocol	-0.820348	0.109091	0.660893	Not Significant
NCAM1_PAPAN	Rejection vs 3-month protocol	-0.820448	0.163636	0.706265	Not Significant
GC_PAPAN	Rejection vs 3-month protocol	-0.83109	0.0424242	0.523547	Not Significant
PDLIM1_PAPAN	Rejection vs 3-month protocol	-0.8393	0.109091	0.660893	Not Significant
KRAS_PIG	Rejection vs 3-month protocol	-0.8416	0.0242424	0.475152	Not Significant
BCHE_PAPAN	Rejection vs 3-month protocol	-0.842151	0.163636	0.706265	Not Significant
QPRT_PAPAN	Rejection vs 3-month protocol	-0.843015	0.109091	0.660893	Not Significant
PPP1R13L_PAPAN	Rejection vs 3-month protocol	-0.847286	0.163636	0.706265	Not Significant
CASZ1_PIG	Rejection vs 3-month protocol	-0.850417	0.0424242	0.523547	Not Significant
ALPL_PAPAN	Rejection vs 3-month protocol	-0.857423	0.0727273	0.608862	Not Significant
SPP1_PAPAN	Rejection vs 3-month protocol	-0.857578	0.230303	0.735028	Not Significant
MAN2B2_PAPAN	Rejection vs 3-month protocol	-0.857956	0.109091	0.660893	Not Significant
MMRN1_PAPAN	Rejection vs 3-month protocol	-0.864525	0.230303	0.735028	Not Significant
CDSN_PAPAN	Rejection vs 3-month protocol	-0.865236	0.163636	0.706265	Not Significant
NUCB1_PIG	Rejection vs 3-month protocol	-0.867296	0.109091	0.660893	Not Significant
ADGRF5_PAPAN	Rejection vs 3-month protocol	-0.869816	0.00606061	0.438999	Not Significant
CTBS_PAPAN	Rejection vs 3-month protocol	-0.869993	0.0424242	0.523547	Not Significant
BPIFB1_PAPAN	Rejection vs 3-month protocol	-0.871406	0.527273	0.884629	Not Significant
MYOM2_PAPAN	Rejection vs 3-month protocol	-0.874803	0.315152	0.795519	Not Significant
SDF4_PAPAN	Rejection vs 3-month protocol	-0.876705	0.0727273	0.608862	Not Significant
DPYS_PAPAN	Rejection vs 3-month protocol	-0.878061	0.648485	0.929755	Not Significant
CCT6A_PAPAN	Rejection vs 3-month protocol	-0.885481	0.527273	0.884629	Not Significant
CRYL1_PAPAN	Rejection vs 3-month protocol	-0.88985	0.0121212	0.475152	Not Significant
PRKCD_PAPAN	Rejection vs 3-month protocol	-0.89251	0.163636	0.706265	Not Significant
GRK6_PAPAN	Rejection vs 3-month protocol	-0.892832	0.0242424	0.475152	Not Significant
CRYBG1_PAPAN	Rejection vs 3-month protocol	-0.89882	0.0424242	0.523547	Not Significant
KRT18_PIG	Rejection vs 3-month protocol	-0.904105	0.0727273	0.608862	Not Significant
F13B_PAPAN	Rejection vs 3-month protocol	-0.904741	0.0727273	0.608862	Not Significant
HK2_PAPAN	Rejection vs 3-month protocol	-0.904971	0.0121212	0.475152	Not Significant
SUSD1_PAPAN	Rejection vs 3-month protocol	-0.905389	0.109091	0.660893	Not Significant
LUM_PAPAN	Rejection vs 3-month protocol	-0.915922	0.0121212	0.475152	Not Significant
ECHDC3_PAPAN	Rejection vs 3-month protocol	-0.919251	0.412121	0.83731	Not Significant
STOM_PAPAN	Rejection vs 3-month protocol	-0.92816	0.0242424	0.475152	Not Significant
MFGE8_PAPAN	Rejection vs 3-month protocol	-0.932526	0.0727273	0.608862	Not Significant
DYNC1H1_PAPAN	Rejection vs 3-month protocol	-0.933013	0.0424242	0.523547	Not Significant
FGGY_PAPAN	Rejection vs 3-month protocol	-0.934948	0.163636	0.706265	Not Significant
CGN_PAPAN	Rejection vs 3-month protocol	-0.937589	0.163636	0.706265	Not Significant
ETHE1_PAPAN	Rejection vs 3-month protocol	-0.937775	0.0242424	0.475152	Not Significant
TBC1D10B_PAPAN	Rejection vs 3-month protocol	-0.938574	0.0727273	0.608862	Not Significant
ACSS2_PAPAN	Rejection vs 3-month protocol	-0.938641	0.109091	0.660893	Not Significant
PZP_PIG	Rejection vs 3-month protocol	-0.941517	0.109091	0.660893	Not Significant
EPHX2_PAPAN	Rejection vs 3-month protocol	-0.942712	0.315152	0.795519	Not Significant
PI16_PAPAN	Rejection vs 3-month protocol	-0.944853	0.109091	0.660893	Not Significant
COL5A1_PIG	Rejection vs 3-month protocol	-0.945466	0.230303	0.735028	Not Significant
DGKA_PAPAN	Rejection vs 3-month protocol	-0.948125	0.109091	0.660893	Not Significant
PLVAP_PAPAN	Rejection vs 3-month protocol	-0.950083	0.0727273	0.608862	Not Significant
CDH5_PAPAN	Rejection vs 3-month protocol	-0.951894	0.0727273	0.608862	Not Significant
PROC_PAPAN	Rejection vs 3-month protocol	-0.952629	0.109091	0.660893	Not Significant
SYTL4_PAPAN	Rejection vs 3-month protocol	-0.953205	0.109091	0.660893	Not Significant
MYO1D_PAPAN	Rejection vs 3-month protocol	-0.954857	0.163636	0.706265	Not Significant
EPPK1_PIG	Rejection vs 3-month protocol	-0.954875	0.0242424	0.475152	Not Significant
C8G_PAPAN	Rejection vs 3-month protocol	-0.960769	0.00606061	0.438999	Not Significant
EPHX1_PAPAN	Rejection vs 3-month protocol	-0.962235	0.412121	0.83731	Not Significant
THBD_PAPAN	Rejection vs 3-month protocol	-0.965167	0.00606061	0.438999	Not Significant
PALM3_PAPAN	Rejection vs 3-month protocol	-0.97196	0.0242424	0.475152	Not Significant
GPLD1_PAPAN	Rejection vs 3-month protocol	-0.975752	0.109091	0.660893	Not Significant
SLC27A4_PAPAN	Rejection vs 3-month protocol	-0.976308	0.163636	0.706265	Not Significant
MTTP_PAPAN	Rejection vs 3-month protocol	-0.977209	0.163636	0.706265	Not Significant
IFITM1_PAPAN	Rejection vs 3-month protocol	-0.990166	0.315152	0.795519	Not Significant
SUN2_PAPAN	Rejection vs 3-month protocol	-0.996919	0.109091	0.660893	Not Significant
DPEP2_PAPAN	Rejection vs 3-month protocol	-1.00049	0.0424242	0.523547	Not Significant
ATRN_PAPAN	Rejection vs 3-month protocol	-1.01021	0.109091	0.660893	Not Significant
CST6_PAPAN	Rejection vs 3-month protocol	-1.01077	0.230303	0.735028	Not Significant
SNX6_PIG	Rejection vs 3-month protocol	-1.01201	0.0424242	0.523547	Not Significant
SULT2B1_PAPAN	Rejection vs 3-month protocol	-1.03092	0.00606061	0.438999	Not Significant
PROS1_PAPAN	Rejection vs 3-month protocol	-1.03711	0.109091	0.660893	Not Significant
FDFT1_PAPAN	Rejection vs 3-month protocol	-1.03854	0.109091	0.660893	Not Significant
TUBB1_PAPAN	Rejection vs 3-month protocol	-1.04506	0.0242424	0.475152	Not Significant
CCAR2_PAPAN	Rejection vs 3-month protocol	-1.05107	0.0121212	0.475152	Not Significant
RNASET2_PAPAN	Rejection vs 3-month protocol	-1.05499	0.0727273	0.608862	Not Significant
APOD_PIG	Rejection vs 3-month protocol	-1.0584	0.163636	0.706265	Not Significant
SPTB_PIG	Rejection vs 3-month protocol	-1.0586	0.230303	0.735028	Not Significant
TFR2_PAPAN	Rejection vs 3-month protocol	-1.05994	0.230303	0.735028	Not Significant
LRG1_PAPAN	Rejection vs 3-month protocol	-1.06691	0.230303	0.735028	Not Significant
STAB2_PAPAN	Rejection vs 3-month protocol	-1.07225	0.163636	0.706265	Not Significant
LGALS3BP_PAPAN	Rejection vs 3-month protocol	-1.07457	0.0727273	0.608862	Not Significant
A1BG_PAPAN	Rejection vs 3-month protocol	-1.07827	0.0727273	0.608862	Not Significant
CMPK2_PAPAN	Rejection vs 3-month protocol	-1.08049	0.109091	0.660893	Not Significant
MYLK_PAPAN	Rejection vs 3-month protocol	-1.0901	0.0727273	0.608862	Not Significant
FGG_PIG	Rejection vs 3-month protocol	-1.09245	0.00606061	0.438999	Not Significant
DCD_PAPAN	Rejection vs 3-month protocol	-1.09513	0.109091	0.660893	Not Significant
CASS4_PAPAN	Rejection vs 3-month protocol	-1.09943	0.0242424	0.475152	Not Significant
FAT1_PAPAN	Rejection vs 3-month protocol	-1.1026	0.0424242	0.523547	Not Significant
ANXA5_PAPAN	Rejection vs 3-month protocol	-1.11463	0.0727273	0.608862	Not Significant
SDHA_PIG	Rejection vs 3-month protocol	-1.11564	0.0121212	0.475152	Not Significant
LIPE_PAPAN	Rejection vs 3-month protocol	-1.12693	0.230303	0.735028	Not Significant
SULT2A1_PAPAN	Rejection vs 3-month protocol	-1.12974	0.00606061	0.438999	Not Significant
MAOB_PAPAN	Rejection vs 3-month protocol	-1.14064	0.0424242	0.523547	Not Significant
AHSG_PIG	Rejection vs 3-month protocol	-1.14359	0.163636	0.706265	Not Significant
ACAT1_PAPAN	Rejection vs 3-month protocol	-1.15925	0.109091	0.660893	Not Significant
HEMGN_PAPAN	Rejection vs 3-month protocol	-1.16125	0.315152	0.795519	Not Significant
MPST_PIG	Rejection vs 3-month protocol	-1.1655	0.0242424	0.475152	Not Significant
ARHGAP18_PAPAN	Rejection vs 3-month protocol	-1.16835	0.0424242	0.523547	Not Significant
C4BPB_PAPAN	Rejection vs 3-month protocol	-1.16841	0.0727273	0.608862	Not Significant
AMH_PAPAN	Rejection vs 3-month protocol	-1.17109	0.0424242	0.523547	Not Significant
TACSTD2_PAPAN	Rejection vs 3-month protocol	-1.1745	0.00606061	0.438999	Not Significant
CRYZ_PAPAN	Rejection vs 3-month protocol	-1.17565	0.412121	0.83731	Not Significant
AGXT_PAPAN	Rejection vs 3-month protocol	-1.18111	0.163636	0.706265	Not Significant
KARS1_PAPAN	Rejection vs 3-month protocol	-1.20426	0.109091	0.660893	Not Significant
OLFM4_PAPAN	Rejection vs 3-month protocol	-1.22054	0.163636	0.706265	Not Significant
RBM12_PAPAN	Rejection vs 3-month protocol	-1.25663	0.109091	0.660893	Not Significant
B3GNT7_PAPAN	Rejection vs 3-month protocol	-1.27906	0.163636	0.706265	Not Significant
CLEC1B_PAPAN	Rejection vs 3-month protocol	-1.28058	0.0242424	0.475152	Not Significant
DUOX1_PAPAN	Rejection vs 3-month protocol	-1.28654	0.0727273	0.608862	Not Significant
BPIFA2_PAPAN	Rejection vs 3-month protocol	-1.33011	0.230303	0.735028	Not Significant
CAVIN2_PAPAN	Rejection vs 3-month protocol	-1.33236	0.0424242	0.523547	Not Significant
MMUT_PAPAN	Rejection vs 3-month protocol	-1.35151	0.00606061	0.438999	Not Significant
MEAK7_PAPAN	Rejection vs 3-month protocol	-1.35228	0.0727273	0.608862	Not Significant
GXYLT1_PAPAN	Rejection vs 3-month protocol	-1.36374	0.0727273	0.608862	Not Significant
SRGN_PAPAN	Rejection vs 3-month protocol	-1.39202	0.109091	0.660893	Not Significant
IGHE_PAPAN	Rejection vs 3-month protocol	-1.47658	0.163636	0.706265	Not Significant
CETP_PAPAN	Rejection vs 3-month protocol	-1.477	0.109091	0.660893	Not Significant
DRG1_PIG	Rejection vs 3-month protocol	-1.50143	0.0242424	0.475152	Not Significant
FLNB_PIG	Rejection vs 3-month protocol	-1.52041	0.109091	0.660893	Not Significant
CALD1_PAPAN	Rejection vs 3-month protocol	-1.52452	0.0242424	0.475152	Not Significant
TTC39B_PIG	Rejection vs 3-month protocol	-1.53258	0.163636	0.706265	Not Significant
PON2_PAPAN	Rejection vs 3-month protocol	-1.56327	0.00606061	0.438999	Not Significant
PEAK3_PAPAN	Rejection vs 3-month protocol	-1.57123	0.163636	0.706265	Not Significant
TNFRSF1B_PAPAN	Rejection vs 3-month protocol	-1.77046	0.0121212	0.475152	Not Significant
DHCR24_PAPAN	Rejection vs 3-month protocol	-1.81984	0.0121212	0.475152	Not Significant
HNRNPL_PAPAN	Rejection vs 3-month protocol	-1.98511	0.0424242	0.523547	Not Significant
GCA_PAPAN	Rejection vs 3-month protocol	-2.1618	0.0242424	0.475152	Not Significant
S100A8_PAPAN	Rejection vs 3-month protocol	-2.16592	0.163636	0.706265	Not Significant
S100A9_PAPAN	Rejection vs 3-month protocol	-2.39802	0.109091	0.660893	Not Significant

## Sheet: pCMV vs 3-month protocol
Gene	Comparison	Log2FC	p_value	p_adj	Significance
ADH7_PAPAN	PCMV/PRV vs 3-month protocol	7.37248	0.0166667	0.057727	Not Significant
CPS1_PAPAN	PCMV/PRV vs 3-month protocol	7.19276	0.0166667	0.057727	Not Significant
ISG15_PAPAN	PCMV/PRV vs 3-month protocol	6.38801	0.0166667	0.057727	Not Significant
OAS2_PAPAN	PCMV/PRV vs 3-month protocol	6.3605	0.0166667	0.057727	Not Significant
ACAA2_PAPAN	PCMV/PRV vs 3-month protocol	5.75618	0.0166667	0.057727	Not Significant
CKM_PAPAN	PCMV/PRV vs 3-month protocol	5.55697	0.0666667	0.142029	Not Significant
SORD_PAPAN	PCMV/PRV vs 3-month protocol	5.02142	0.0166667	0.057727	Not Significant
LMNA_PAPAN	PCMV/PRV vs 3-month protocol	4.71744	0.0166667	0.057727	Not Significant
ECHS1_PAPAN	PCMV/PRV vs 3-month protocol	4.71011	0.0166667	0.057727	Not Significant
UGP2_PAPAN	PCMV/PRV vs 3-month protocol	4.64913	0.0166667	0.057727	Not Significant
MDH2_PAPAN	PCMV/PRV vs 3-month protocol	4.62941	0.0166667	0.057727	Not Significant
FTH1_PAPAN	PCMV/PRV vs 3-month protocol	4.59137	0.0166667	0.057727	Not Significant
ECI1_PAPAN	PCMV/PRV vs 3-month protocol	4.56634	0.0166667	0.057727	Not Significant
DNPEP_PAPAN	PCMV/PRV vs 3-month protocol	4.51438	0.0166667	0.057727	Not Significant
HBG2_1_PAPAN	PCMV/PRV vs 3-month protocol	4.41103	0.0333333	0.0862319	Not Significant
CLC_PAPAN	PCMV/PRV vs 3-month protocol	4.28998	0.0666667	0.142029	Not Significant
SHMT1_PAPAN	PCMV/PRV vs 3-month protocol	4.15132	0.0166667	0.057727	Not Significant
RRBP1_PAPAN	PCMV/PRV vs 3-month protocol	4.11913	0.0166667	0.057727	Not Significant
LAP3_PAPAN	PCMV/PRV vs 3-month protocol	3.99453	0.0166667	0.057727	Not Significant
PYGM_PAPAN	PCMV/PRV vs 3-month protocol	3.90983	0.183333	0.290889	Not Significant
ACAA1_PAPAN	PCMV/PRV vs 3-month protocol	3.86067	0.0166667	0.057727	Not Significant
GLUD1_PAPAN	PCMV/PRV vs 3-month protocol	3.75084	0.0166667	0.057727	Not Significant
PYGL_PAPAN	PCMV/PRV vs 3-month protocol	3.73386	0.0166667	0.057727	Not Significant
OAS3_PAPAN	PCMV/PRV vs 3-month protocol	3.5717	0.0166667	0.057727	Not Significant
CAT_PAPAN	PCMV/PRV vs 3-month protocol	3.53636	0.0166667	0.057727	Not Significant
CRYZ_PAPAN	PCMV/PRV vs 3-month protocol	3.51125	0.0166667	0.057727	Not Significant
ADH4_PAPAN	PCMV/PRV vs 3-month protocol	3.50968	0.0333333	0.0862319	Not Significant
MX1_PAPAN	PCMV/PRV vs 3-month protocol	3.49489	0.0166667	0.057727	Not Significant
PTX3_PAPAN	PCMV/PRV vs 3-month protocol	3.49186	0.0166667	0.057727	Not Significant
GSTZ1_PAPAN	PCMV/PRV vs 3-month protocol	3.48921	0.0166667	0.057727	Not Significant
MDH1_PAPAN	PCMV/PRV vs 3-month protocol	3.45726	0.0166667	0.057727	Not Significant
FYCO1_PAPAN	PCMV/PRV vs 3-month protocol	3.44028	0.0166667	0.057727	Not Significant
PSMB9_PAPAN	PCMV/PRV vs 3-month protocol	3.43976	0.0166667	0.057727	Not Significant
BHMT_PAPAN	PCMV/PRV vs 3-month protocol	3.41142	0.0166667	0.057727	Not Significant
ALDOB_PAPAN	PCMV/PRV vs 3-month protocol	3.27354	0.0166667	0.057727	Not Significant
GAPDH_PIG	PCMV/PRV vs 3-month protocol	3.2581	0.0166667	0.057727	Not Significant
HPD_PAPAN	PCMV/PRV vs 3-month protocol	3.24676	0.0166667	0.057727	Not Significant
ALDH1A1_PAPAN	PCMV/PRV vs 3-month protocol	3.1923	0.0166667	0.057727	Not Significant
LDHA_PAPAN	PCMV/PRV vs 3-month protocol	3.18987	0.0166667	0.057727	Not Significant
PARVG_PAPAN	PCMV/PRV vs 3-month protocol	3.18374	0.0166667	0.057727	Not Significant
PSMB10_PAPAN	PCMV/PRV vs 3-month protocol	3.17219	0.0166667	0.057727	Not Significant
PCCA_PAPAN	PCMV/PRV vs 3-month protocol	3.12953	0.0166667	0.057727	Not Significant
OTC_PAPAN	PCMV/PRV vs 3-month protocol	3.10532	0.0166667	0.057727	Not Significant
TKFC_PAPAN	PCMV/PRV vs 3-month protocol	3.08104	0.0166667	0.057727	Not Significant
ENO1_PAPAN	PCMV/PRV vs 3-month protocol	2.97689	0.0166667	0.057727	Not Significant
PCCB_PAPAN	PCMV/PRV vs 3-month protocol	2.88497	0.0166667	0.057727	Not Significant
XRCC6_PAPAN	PCMV/PRV vs 3-month protocol	2.84856	0.0166667	0.057727	Not Significant
MACF1_PIG	PCMV/PRV vs 3-month protocol	2.80589	0.0166667	0.057727	Not Significant
AKR7L_PAPAN	PCMV/PRV vs 3-month protocol	2.78335	0.0166667	0.057727	Not Significant
HSPB1_PIG	PCMV/PRV vs 3-month protocol	2.75536	0.0166667	0.057727	Not Significant
SCP2_PAPAN	PCMV/PRV vs 3-month protocol	2.74674	0.0166667	0.057727	Not Significant
PSMA3_PIG	PCMV/PRV vs 3-month protocol	2.73753	0.0166667	0.057727	Not Significant
IDH1_PAPAN	PCMV/PRV vs 3-month protocol	2.70847	0.0166667	0.057727	Not Significant
HNRNPC_PAPAN	PCMV/PRV vs 3-month protocol	2.69065	0.0166667	0.057727	Not Significant
WARS1_PAPAN	PCMV/PRV vs 3-month protocol	2.68045	0.0166667	0.057727	Not Significant
KRT4_PAPAN	PCMV/PRV vs 3-month protocol	2.67911	0.0166667	0.057727	Not Significant
PCK2_PAPAN	PCMV/PRV vs 3-month protocol	2.67121	0.0166667	0.057727	Not Significant
DLD_PAPAN	PCMV/PRV vs 3-month protocol	2.6651	0.0166667	0.057727	Not Significant
EPHX1_PAPAN	PCMV/PRV vs 3-month protocol	2.65978	0.0333333	0.0862319	Not Significant
TNRC6B_PAPAN	PCMV/PRV vs 3-month protocol	2.64807	0.0166667	0.057727	Not Significant
PGM2_PAPAN	PCMV/PRV vs 3-month protocol	2.64067	0.0166667	0.057727	Not Significant
ITGAM_PAPAN	PCMV/PRV vs 3-month protocol	2.59535	0.0166667	0.057727	Not Significant
OLFM4_PAPAN	PCMV/PRV vs 3-month protocol	2.54472	0.0166667	0.057727	Not Significant
GIMAP4_PAPAN	PCMV/PRV vs 3-month protocol	2.52119	0.0166667	0.057727	Not Significant
CYCS_PAPAN	PCMV/PRV vs 3-month protocol	2.48251	0.0166667	0.057727	Not Significant
TMEM40_PAPAN	PCMV/PRV vs 3-month protocol	2.48132	0.0166667	0.057727	Not Significant
LTF_PAPAN	PCMV/PRV vs 3-month protocol	2.47789	0.0333333	0.0862319	Not Significant
VSIG4_PAPAN	PCMV/PRV vs 3-month protocol	2.47584	0.0166667	0.057727	Not Significant
CD38_PAPAN	PCMV/PRV vs 3-month protocol	2.46181	0.0166667	0.057727	Not Significant
GATM_PAPAN	PCMV/PRV vs 3-month protocol	2.45323	0.0333333	0.0862319	Not Significant
HMOX1_PAPAN	PCMV/PRV vs 3-month protocol	2.42606	0.0166667	0.057727	Not Significant
RCC1_PIG	PCMV/PRV vs 3-month protocol	2.4142	0.0166667	0.057727	Not Significant
ANXA1_PAPAN	PCMV/PRV vs 3-month protocol	2.41266	0.0166667	0.057727	Not Significant
PLSCR1_PAPAN	PCMV/PRV vs 3-month protocol	2.41083	0.0166667	0.057727	Not Significant
FLNC_PAPAN	PCMV/PRV vs 3-month protocol	2.40646	0.116667	0.212888	Not Significant
BAAT_PAPAN	PCMV/PRV vs 3-month protocol	2.39188	0.0333333	0.0862319	Not Significant
HSPE1_PIG	PCMV/PRV vs 3-month protocol	2.39137	0.0166667	0.057727	Not Significant
GBP3_PAPAN	PCMV/PRV vs 3-month protocol	2.37013	0.0166667	0.057727	Not Significant
GRHPR_PAPAN	PCMV/PRV vs 3-month protocol	2.36785	0.0166667	0.057727	Not Significant
KRT34_PAPAN	PCMV/PRV vs 3-month protocol	2.36185	0.0166667	0.057727	Not Significant
IDH2_PAPAN	PCMV/PRV vs 3-month protocol	2.34573	0.0166667	0.057727	Not Significant
ACO2_PAPAN	PCMV/PRV vs 3-month protocol	2.3167	0.0166667	0.057727	Not Significant
IFITM1_PAPAN	PCMV/PRV vs 3-month protocol	2.27508	0.0166667	0.057727	Not Significant
CNP_PAPAN	PCMV/PRV vs 3-month protocol	2.23569	0.0166667	0.057727	Not Significant
CMAS_PAPAN	PCMV/PRV vs 3-month protocol	2.22719	0.0166667	0.057727	Not Significant
ACAT1_PAPAN	PCMV/PRV vs 3-month protocol	2.21295	0.0666667	0.142029	Not Significant
MAT2B_PAPAN	PCMV/PRV vs 3-month protocol	2.21082	0.0166667	0.057727	Not Significant
HAO1_PAPAN	PCMV/PRV vs 3-month protocol	2.19885	0.0166667	0.057727	Not Significant
ANXA6_PAPAN	PCMV/PRV vs 3-month protocol	2.19787	0.0166667	0.057727	Not Significant
ILF2_PIG	PCMV/PRV vs 3-month protocol	2.18583	0.0166667	0.057727	Not Significant
CKM_PIG	PCMV/PRV vs 3-month protocol	2.18535	0.0666667	0.142029	Not Significant
ACO1_PAPAN	PCMV/PRV vs 3-month protocol	2.1768	0.0166667	0.057727	Not Significant
MARCKS_PAPAN	PCMV/PRV vs 3-month protocol	2.14148	0.0166667	0.057727	Not Significant
ALDH1L1_PAPAN	PCMV/PRV vs 3-month protocol	2.14141	0.116667	0.212888	Not Significant
SDR9C7_PIG	PCMV/PRV vs 3-month protocol	2.13814	0.0333333	0.0862319	Not Significant
TTN_PAPAN	PCMV/PRV vs 3-month protocol	2.13706	0.183333	0.290889	Not Significant
EEF1D_PAPAN	PCMV/PRV vs 3-month protocol	2.1361	0.0166667	0.057727	Not Significant
TKT_PAPAN	PCMV/PRV vs 3-month protocol	2.12603	0.0166667	0.057727	Not Significant
TRIM72_PAPAN	PCMV/PRV vs 3-month protocol	2.11633	0.0166667	0.057727	Not Significant
KHSRP_PIG	PCMV/PRV vs 3-month protocol	2.09316	0.0166667	0.057727	Not Significant
GPI_PAPAN	PCMV/PRV vs 3-month protocol	2.06764	0.0166667	0.057727	Not Significant
GOT1_PAPAN	PCMV/PRV vs 3-month protocol	2.05784	0.0666667	0.142029	Not Significant
CA3_PAPAN	PCMV/PRV vs 3-month protocol	2.05281	0.266667	0.385314	Not Significant
DECR1_PAPAN	PCMV/PRV vs 3-month protocol	2.04687	0.0166667	0.057727	Not Significant
HBA_PAPAN	PCMV/PRV vs 3-month protocol	2.04572	0.0333333	0.0862319	Not Significant
CTH_PAPAN	PCMV/PRV vs 3-month protocol	2.03594	0.0166667	0.057727	Not Significant
PAICS_PAPAN	PCMV/PRV vs 3-month protocol	2.03326	0.0166667	0.057727	Not Significant
EZR_PAPAN	PCMV/PRV vs 3-month protocol	2.02999	0.0166667	0.057727	Not Significant
GDI2_PAPAN	PCMV/PRV vs 3-month protocol	2.01897	0.0166667	0.057727	Not Significant
CA4_PAPAN	PCMV/PRV vs 3-month protocol	2.01767	0.0166667	0.057727	Not Significant
ALDH1A3_PAPAN	PCMV/PRV vs 3-month protocol	1.99246	0.0333333	0.0862319	Not Significant
SOD2_PAPAN	PCMV/PRV vs 3-month protocol	1.99174	0.0166667	0.057727	Not Significant
IFI44_PAPAN	PCMV/PRV vs 3-month protocol	1.97332	0.0166667	0.057727	Not Significant
OAS1_PAPAN	PCMV/PRV vs 3-month protocol	1.96788	0.0666667	0.142029	Not Significant
PSMB8_PAPAN	PCMV/PRV vs 3-month protocol	1.96771	0.0166667	0.057727	Not Significant
IL1RL1_PAPAN	PCMV/PRV vs 3-month protocol	1.96652	0.183333	0.290889	Not Significant
CAT_PIG	PCMV/PRV vs 3-month protocol	1.96389	0.383333	0.502465	Not Significant
FSCN1_PAPAN	PCMV/PRV vs 3-month protocol	1.96206	0.0166667	0.057727	Not Significant
COL1A2_PAPAN	PCMV/PRV vs 3-month protocol	1.9172	0.0333333	0.0862319	Not Significant
TALDO1_PAPAN	PCMV/PRV vs 3-month protocol	1.89376	0.0166667	0.057727	Not Significant
CNDP1_PAPAN	PCMV/PRV vs 3-month protocol	1.89194	0.0166667	0.057727	Not Significant
CD81_PAPAN	PCMV/PRV vs 3-month protocol	1.89111	0.0166667	0.057727	Not Significant
ANXA3_PAPAN	PCMV/PRV vs 3-month protocol	1.89026	0.0166667	0.057727	Not Significant
EEF1G_PAPAN	PCMV/PRV vs 3-month protocol	1.88838	0.0333333	0.0862319	Not Significant
KRT84_PAPAN	PCMV/PRV vs 3-month protocol	1.8881	0.116667	0.212888	Not Significant
MYO1E_PIG	PCMV/PRV vs 3-month protocol	1.86739	0.0333333	0.0862319	Not Significant
RPL12_PIG	PCMV/PRV vs 3-month protocol	1.83979	0.0166667	0.057727	Not Significant
XRCC5_PAPAN	PCMV/PRV vs 3-month protocol	1.83719	0.0166667	0.057727	Not Significant
NPEPPS_PAPAN	PCMV/PRV vs 3-month protocol	1.83707	0.0666667	0.142029	Not Significant
GSTM2_PAPAN	PCMV/PRV vs 3-month protocol	1.83539	0.116667	0.212888	Not Significant
ASL_PAPAN	PCMV/PRV vs 3-month protocol	1.83051	0.0166667	0.057727	Not Significant
HEMGN_PAPAN	PCMV/PRV vs 3-month protocol	1.82111	0.266667	0.385314	Not Significant
GPD1_PAPAN	PCMV/PRV vs 3-month protocol	1.80457	0.266667	0.385314	Not Significant
PKP3_PIG	PCMV/PRV vs 3-month protocol	1.80242	0.0166667	0.057727	Not Significant
HBB_PAPAN	PCMV/PRV vs 3-month protocol	1.76091	0.0666667	0.142029	Not Significant
SF3B2_PAPAN	PCMV/PRV vs 3-month protocol	1.75022	0.0166667	0.057727	Not Significant
FAM83H_PAPAN	PCMV/PRV vs 3-month protocol	1.74382	0.183333	0.290889	Not Significant
AHCY_PAPAN	PCMV/PRV vs 3-month protocol	1.74215	0.0166667	0.057727	Not Significant
TUBB_PIG	PCMV/PRV vs 3-month protocol	1.73149	0.0166667	0.057727	Not Significant
KLHL41_PAPAN	PCMV/PRV vs 3-month protocol	1.73122	0.0166667	0.057727	Not Significant
ARPC5_PAPAN	PCMV/PRV vs 3-month protocol	1.72172	0.0333333	0.0862319	Not Significant
PLGRKT_PAPAN	PCMV/PRV vs 3-month protocol	1.7193	0.0166667	0.057727	Not Significant
PSME1_PAPAN	PCMV/PRV vs 3-month protocol	1.71707	0.0166667	0.057727	Not Significant
APOL2_PAPAN	PCMV/PRV vs 3-month protocol	1.70469	0.0166667	0.057727	Not Significant
SLC1A5_PAPAN	PCMV/PRV vs 3-month protocol	1.677	0.266667	0.385314	Not Significant
DCXR_PAPAN	PCMV/PRV vs 3-month protocol	1.67655	0.0333333	0.0862319	Not Significant
ANXA7_PAPAN	PCMV/PRV vs 3-month protocol	1.67544	0.0166667	0.057727	Not Significant
EPHX2_PAPAN	PCMV/PRV vs 3-month protocol	1.67175	0.0333333	0.0862319	Not Significant
HGD_PAPAN	PCMV/PRV vs 3-month protocol	1.65463	0.0333333	0.0862319	Not Significant
ACY1_PAPAN	PCMV/PRV vs 3-month protocol	1.64578	0.0333333	0.0862319	Not Significant
ITGB2_PAPAN	PCMV/PRV vs 3-month protocol	1.63544	0.0166667	0.057727	Not Significant
STAT1_PAPAN	PCMV/PRV vs 3-month protocol	1.6117	0.0166667	0.057727	Not Significant
KARS1_PAPAN	PCMV/PRV vs 3-month protocol	1.59403	0.0333333	0.0862319	Not Significant
ACOX1_PAPAN	PCMV/PRV vs 3-month protocol	1.5937	0.0166667	0.057727	Not Significant
IFIT5_PAPAN	PCMV/PRV vs 3-month protocol	1.59327	0.0166667	0.057727	Not Significant
HSPA4_PAPAN	PCMV/PRV vs 3-month protocol	1.58388	0.0166667	0.057727	Not Significant
NAGK_PAPAN	PCMV/PRV vs 3-month protocol	1.57936	0.0166667	0.057727	Not Significant
AGXT_PAPAN	PCMV/PRV vs 3-month protocol	1.56915	0.183333	0.290889	Not Significant
AQP1_PAPAN	PCMV/PRV vs 3-month protocol	1.5532	0.0333333	0.0862319	Not Significant
SDCBP_PAPAN	PCMV/PRV vs 3-month protocol	1.54995	0.0333333	0.0862319	Not Significant
PGD_PAPAN	PCMV/PRV vs 3-month protocol	1.54728	0.0166667	0.057727	Not Significant
PBLD_PAPAN	PCMV/PRV vs 3-month protocol	1.54621	0.116667	0.212888	Not Significant
KRT39_PAPAN	PCMV/PRV vs 3-month protocol	1.53561	0.383333	0.502465	Not Significant
ACAT2_PAPAN	PCMV/PRV vs 3-month protocol	1.53245	0.0333333	0.0862319	Not Significant
GBE1_PAPAN	PCMV/PRV vs 3-month protocol	1.52444	0.0166667	0.057727	Not Significant
ETFB_PAPAN	PCMV/PRV vs 3-month protocol	1.52189	0.0166667	0.057727	Not Significant
ARPC1B_PAPAN	PCMV/PRV vs 3-month protocol	1.51213	0.0166667	0.057727	Not Significant
MPO_PAPAN	PCMV/PRV vs 3-month protocol	1.50846	0.0333333	0.0862319	Not Significant
SARDH_PAPAN	PCMV/PRV vs 3-month protocol	1.50345	0.0666667	0.142029	Not Significant
BPI_PAPAN	PCMV/PRV vs 3-month protocol	1.4988	0.0166667	0.057727	Not Significant
ALDOA_PIG	PCMV/PRV vs 3-month protocol	1.47581	0.183333	0.290889	Not Significant
CPOX_PAPAN	PCMV/PRV vs 3-month protocol	1.4687	0.0166667	0.057727	Not Significant
CARS1_PAPAN	PCMV/PRV vs 3-month protocol	1.44176	0.0166667	0.057727	Not Significant
MTAP_PAPAN	PCMV/PRV vs 3-month protocol	1.42913	0.0166667	0.057727	Not Significant
PDIA3_PAPAN	PCMV/PRV vs 3-month protocol	1.42568	0.0166667	0.057727	Not Significant
SLFN5_PAPAN	PCMV/PRV vs 3-month protocol	1.4229	0.0166667	0.057727	Not Significant
RIGI_PAPAN	PCMV/PRV vs 3-month protocol	1.41508	0.0166667	0.057727	Not Significant
FLNB_PAPAN	PCMV/PRV vs 3-month protocol	1.41394	0.0166667	0.057727	Not Significant
COPS3_PIG	PCMV/PRV vs 3-month protocol	1.40961	0.0166667	0.057727	Not Significant
DLST_PAPAN	PCMV/PRV vs 3-month protocol	1.40463	0.116667	0.212888	Not Significant
LAMB3_PAPAN	PCMV/PRV vs 3-month protocol	1.40271	0.0166667	0.057727	Not Significant
FAH_PAPAN	PCMV/PRV vs 3-month protocol	1.40235	0.0166667	0.057727	Not Significant
ENO3_PAPAN	PCMV/PRV vs 3-month protocol	1.38968	1	1	Not Significant
ATP2B4_PAPAN	PCMV/PRV vs 3-month protocol	1.38385	0.0166667	0.057727	Not Significant
SERPINB5_PAPAN	PCMV/PRV vs 3-month protocol	1.37525	0.0166667	0.057727	Not Significant
PYGB_PAPAN	PCMV/PRV vs 3-month protocol	1.36472	0.0166667	0.057727	Not Significant
RPS25_PIG	PCMV/PRV vs 3-month protocol	1.3599	0.0666667	0.142029	Not Significant
PSME2_PAPAN	PCMV/PRV vs 3-month protocol	1.34917	0.0166667	0.057727	Not Significant
SERPINE1_PAPAN	PCMV/PRV vs 3-month protocol	1.34885	0.0333333	0.0862319	Not Significant
SERPINB2_PIG	PCMV/PRV vs 3-month protocol	1.34042	0.0666667	0.142029	Not Significant
GCLC_PAPAN	PCMV/PRV vs 3-month protocol	1.33603	0.0166667	0.057727	Not Significant
PNP_PAPAN	PCMV/PRV vs 3-month protocol	1.33567	0.0166667	0.057727	Not Significant
STOM_PAPAN	PCMV/PRV vs 3-month protocol	1.32976	0.0333333	0.0862319	Not Significant
SRPRB_PAPAN	PCMV/PRV vs 3-month protocol	1.32921	0.0333333	0.0862319	Not Significant
MTHFD1_PIG	PCMV/PRV vs 3-month protocol	1.3285	0.0166667	0.057727	Not Significant
AKR1C1_PAPAN	PCMV/PRV vs 3-month protocol	1.3233	0.383333	0.502465	Not Significant
HPRT1_PAPAN	PCMV/PRV vs 3-month protocol	1.315	0.0166667	0.057727	Not Significant
CORO1A_PAPAN	PCMV/PRV vs 3-month protocol	1.31432	0.266667	0.385314	Not Significant
RPL10A_PIG	PCMV/PRV vs 3-month protocol	1.31028	0.0666667	0.142029	Not Significant
BASP1_PAPAN	PCMV/PRV vs 3-month protocol	1.30552	0.183333	0.290889	Not Significant
PLEC_PAPAN	PCMV/PRV vs 3-month protocol	1.29691	0.0666667	0.142029	Not Significant
BSG_PAPAN	PCMV/PRV vs 3-month protocol	1.29495	0.116667	0.212888	Not Significant
CRABP2_PAPAN	PCMV/PRV vs 3-month protocol	1.27856	0.0166667	0.057727	Not Significant
SVEP1_PAPAN	PCMV/PRV vs 3-month protocol	1.27676	0.0333333	0.0862319	Not Significant
EVPL_PIG	PCMV/PRV vs 3-month protocol	1.27583	0.383333	0.502465	Not Significant
CP_PIG	PCMV/PRV vs 3-month protocol	1.24948	0.0666667	0.142029	Not Significant
CWH43_PAPAN	PCMV/PRV vs 3-month protocol	1.2363	0.0166667	0.057727	Not Significant
ACIN1_PAPAN	PCMV/PRV vs 3-month protocol	1.23459	0.0666667	0.142029	Not Significant
LBP_PAPAN	PCMV/PRV vs 3-month protocol	1.2287	0.383333	0.502465	Not Significant
UROD_PAPAN	PCMV/PRV vs 3-month protocol	1.2281	0.0333333	0.0862319	Not Significant
EIF3C_PAPAN	PCMV/PRV vs 3-month protocol	1.22602	0.0666667	0.142029	Not Significant
VARS1_PIG	PCMV/PRV vs 3-month protocol	1.22525	0.0166667	0.057727	Not Significant
YWHAZ_PIG	PCMV/PRV vs 3-month protocol	1.22296	0.0333333	0.0862319	Not Significant
PML_PAPAN	PCMV/PRV vs 3-month protocol	1.21965	0.0166667	0.057727	Not Significant
AKR7A2_PAPAN	PCMV/PRV vs 3-month protocol	1.21831	0.0666667	0.142029	Not Significant
CARKD_PAPAN	PCMV/PRV vs 3-month protocol	1.21207	0.183333	0.290889	Not Significant
SEC14L2_PAPAN	PCMV/PRV vs 3-month protocol	1.20944	0.183333	0.290889	Not Significant
MPP1_PAPAN	PCMV/PRV vs 3-month protocol	1.19869	0.116667	0.212888	Not Significant
MYL1_PAPAN	PCMV/PRV vs 3-month protocol	1.19861	0.266667	0.385314	Not Significant
FERMT1_PAPAN	PCMV/PRV vs 3-month protocol	1.18217	0.116667	0.212888	Not Significant
GOT2_PAPAN	PCMV/PRV vs 3-month protocol	1.17804	0.0333333	0.0862319	Not Significant
SCIN_PAPAN	PCMV/PRV vs 3-month protocol	1.17621	0.116667	0.212888	Not Significant
ME1_PAPAN	PCMV/PRV vs 3-month protocol	1.17257	0.0666667	0.142029	Not Significant
MYOM3_PAPAN	PCMV/PRV vs 3-month protocol	1.16429	0.183333	0.290889	Not Significant
COPE_PAPAN	PCMV/PRV vs 3-month protocol	1.1634	0.266667	0.385314	Not Significant
CD82_PAPAN	PCMV/PRV vs 3-month protocol	1.15838	0.0333333	0.0862319	Not Significant
AEBP1_PIG	PCMV/PRV vs 3-month protocol	1.15452	0.0166667	0.057727	Not Significant
FUOM_PAPAN	PCMV/PRV vs 3-month protocol	1.15168	0.116667	0.212888	Not Significant
CAPN1_PAPAN	PCMV/PRV vs 3-month protocol	1.14548	0.0333333	0.0862319	Not Significant
EPB42_PAPAN	PCMV/PRV vs 3-month protocol	1.14403	0.183333	0.290889	Not Significant
COPS8_PAPAN	PCMV/PRV vs 3-month protocol	1.13957	0.0166667	0.057727	Not Significant
NCL_PAPAN	PCMV/PRV vs 3-month protocol	1.13337	0.0666667	0.142029	Not Significant
VCAN_PAPAN	PCMV/PRV vs 3-month protocol	1.11076	0.183333	0.290889	Not Significant
CAPZA1_PAPAN	PCMV/PRV vs 3-month protocol	1.10896	0.0666667	0.142029	Not Significant
RPS16_PIG	PCMV/PRV vs 3-month protocol	1.10727	0.116667	0.212888	Not Significant
NIBAN1_PAPAN	PCMV/PRV vs 3-month protocol	1.10339	0.0333333	0.0862319	Not Significant
RPN2_PAPAN	PCMV/PRV vs 3-month protocol	1.10323	0.0166667	0.057727	Not Significant
STEAP3_PAPAN	PCMV/PRV vs 3-month protocol	1.10307	0.266667	0.385314	Not Significant
PKM_PAPAN	PCMV/PRV vs 3-month protocol	1.10045	0.383333	0.502465	Not Significant
RPS6_PIG	PCMV/PRV vs 3-month protocol	1.09645	0.183333	0.290889	Not Significant
SDHA_PIG	PCMV/PRV vs 3-month protocol	1.08768	0.0333333	0.0862319	Not Significant
PTGES3_PIG	PCMV/PRV vs 3-month protocol	1.08021	0.183333	0.290889	Not Significant
PLIN4_PAPAN	PCMV/PRV vs 3-month protocol	1.07797	0.666667	0.75045	Not Significant
FDPS_PAPAN	PCMV/PRV vs 3-month protocol	1.07499	0.116667	0.212888	Not Significant
SULT2A1_PAPAN	PCMV/PRV vs 3-month protocol	1.0736	0.266667	0.385314	Not Significant
SLC29A1_PAPAN	PCMV/PRV vs 3-month protocol	1.07204	0.266667	0.385314	Not Significant
PCK1_PAPAN	PCMV/PRV vs 3-month protocol	1.07103	0.666667	0.75045	Not Significant
XDH_PAPAN	PCMV/PRV vs 3-month protocol	1.0708	0.0333333	0.0862319	Not Significant
SPTAN1_PAPAN	PCMV/PRV vs 3-month protocol	1.07069	0.0333333	0.0862319	Not Significant
SLC4A1_PAPAN	PCMV/PRV vs 3-month protocol	1.06996	0.183333	0.290889	Not Significant
CAST_PAPAN	PCMV/PRV vs 3-month protocol	1.03382	0.0666667	0.142029	Not Significant
HMGB2_PIG	PCMV/PRV vs 3-month protocol	1.03125	0.116667	0.212888	Not Significant
PDIA4_PAPAN	PCMV/PRV vs 3-month protocol	1.01561	0.0166667	0.057727	Not Significant
NEU2_PAPAN	PCMV/PRV vs 3-month protocol	1.00918	0.0666667	0.142029	Not Significant
VPS13C_PIG	PCMV/PRV vs 3-month protocol	1.00567	0.0666667	0.142029	Not Significant
HSD17B4_PAPAN	PCMV/PRV vs 3-month protocol	1	0.0333333	0.0862319	Not Significant
RDH11_PAPAN	PCMV/PRV vs 3-month protocol	0.992677	0.0333333	0.0862319	Not Significant
DPYD_PAPAN	PCMV/PRV vs 3-month protocol	0.985412	0.0333333	0.0862319	Not Significant
MMP1_PAPAN	PCMV/PRV vs 3-month protocol	0.984373	0.666667	0.75045	Not Significant
VWCE_PAPAN	PCMV/PRV vs 3-month protocol	0.97529	0.0166667	0.057727	Not Significant
HSPA9_PAPAN	PCMV/PRV vs 3-month protocol	0.96749	0.116667	0.212888	Not Significant
TREX2_PAPAN	PCMV/PRV vs 3-month protocol	0.962861	0.0166667	0.057727	Not Significant
TPR_PAPAN	PCMV/PRV vs 3-month protocol	0.96111	0.0166667	0.057727	Not Significant
ALDH2_PAPAN	PCMV/PRV vs 3-month protocol	0.960882	0.0333333	0.0862319	Not Significant
THY1_PAPAN	PCMV/PRV vs 3-month protocol	0.947764	0.0333333	0.0862319	Not Significant
CD59_PAPAN	PCMV/PRV vs 3-month protocol	0.918284	0.0333333	0.0862319	Not Significant
BTN2A1_PAPAN	PCMV/PRV vs 3-month protocol	0.907052	0.116667	0.212888	Not Significant
UFL1_PAPAN	PCMV/PRV vs 3-month protocol	0.902941	0.183333	0.290889	Not Significant
ATP12A_PAPAN	PCMV/PRV vs 3-month protocol	0.900435	0.0666667	0.142029	Not Significant
MAOB_PAPAN	PCMV/PRV vs 3-month protocol	0.88919	0.383333	0.502465	Not Significant
ALOX15_PAPAN	PCMV/PRV vs 3-month protocol	0.884815	0.183333	0.290889	Not Significant
FH_PAPAN	PCMV/PRV vs 3-month protocol	0.881095	0.183333	0.290889	Not Significant
CCAR1_PIG	PCMV/PRV vs 3-month protocol	0.880932	0.183333	0.290889	Not Significant
DERA_PAPAN	PCMV/PRV vs 3-month protocol	0.876754	0.0166667	0.057727	Not Significant
ARF4_PAPAN	PCMV/PRV vs 3-month protocol	0.875449	0.183333	0.290889	Not Significant
ANK1_PAPAN	PCMV/PRV vs 3-month protocol	0.869759	0.116667	0.212888	Not Significant
ECM1_PIG	PCMV/PRV vs 3-month protocol	0.869712	0.383333	0.502465	Not Significant
MYOT_PAPAN	PCMV/PRV vs 3-month protocol	0.866146	0.183333	0.290889	Not Significant
LRBA_PAPAN	PCMV/PRV vs 3-month protocol	0.865106	0.183333	0.290889	Not Significant
TRIM29_PAPAN	PCMV/PRV vs 3-month protocol	0.865022	0.183333	0.290889	Not Significant
PALMD_PAPAN	PCMV/PRV vs 3-month protocol	0.862447	0.266667	0.385314	Not Significant
HMGCS2_PAPAN	PCMV/PRV vs 3-month protocol	0.859276	0.183333	0.290889	Not Significant
GFUS_PAPAN	PCMV/PRV vs 3-month protocol	0.852706	0.183333	0.290889	Not Significant
KYNU_PAPAN	PCMV/PRV vs 3-month protocol	0.85168	0.183333	0.290889	Not Significant
MYBPC2_PIG	PCMV/PRV vs 3-month protocol	0.835611	0.183333	0.290889	Not Significant
F11R_PAPAN	PCMV/PRV vs 3-month protocol	0.826658	0.0666667	0.142029	Not Significant
CBR1_PAPAN	PCMV/PRV vs 3-month protocol	0.825336	0.183333	0.290889	Not Significant
PTPRC_PAPAN	PCMV/PRV vs 3-month protocol	0.821764	0.183333	0.290889	Not Significant
GDI1_PAPAN	PCMV/PRV vs 3-month protocol	0.816192	0.116667	0.212888	Not Significant
PTPN6_PAPAN	PCMV/PRV vs 3-month protocol	0.807786	0.116667	0.212888	Not Significant
SUB1_PIG	PCMV/PRV vs 3-month protocol	0.807349	0.183333	0.290889	Not Significant
ITGAL_PAPAN	PCMV/PRV vs 3-month protocol	0.795634	0.0333333	0.0862319	Not Significant
ITIH5_PAPAN	PCMV/PRV vs 3-month protocol	0.785816	0.0333333	0.0862319	Not Significant
RPL23A_PIG	PCMV/PRV vs 3-month protocol	0.768345	0.0166667	0.057727	Not Significant
DIAPH1_PAPAN	PCMV/PRV vs 3-month protocol	0.763661	0.266667	0.385314	Not Significant
SPRR1B_PAPAN	PCMV/PRV vs 3-month protocol	0.753945	0.383333	0.502465	Not Significant
PKLR_PAPAN	PCMV/PRV vs 3-month protocol	0.751788	0.183333	0.290889	Not Significant
NPEPL1_PAPAN	PCMV/PRV vs 3-month protocol	0.751153	0.116667	0.212888	Not Significant
TST_PAPAN	PCMV/PRV vs 3-month protocol	0.741544	0.0333333	0.0862319	Not Significant
ALDH16A1_PAPAN	PCMV/PRV vs 3-month protocol	0.736155	0.183333	0.290889	Not Significant
LDHB_PAPAN	PCMV/PRV vs 3-month protocol	0.734157	0.116667	0.212888	Not Significant
LYN_PAPAN	PCMV/PRV vs 3-month protocol	0.728991	0.183333	0.290889	Not Significant
EIF4G1_PAPAN	PCMV/PRV vs 3-month protocol	0.728314	0.116667	0.212888	Not Significant
GP1BB_PAPAN	PCMV/PRV vs 3-month protocol	0.721302	0.666667	0.75045	Not Significant
EIF3B_PAPAN	PCMV/PRV vs 3-month protocol	0.720869	0.183333	0.290889	Not Significant
AGL_PAPAN	PCMV/PRV vs 3-month protocol	0.718269	0.383333	0.502465	Not Significant
GRN_PAPAN	PCMV/PRV vs 3-month protocol	0.714842	0.266667	0.385314	Not Significant
TTC38_PAPAN	PCMV/PRV vs 3-month protocol	0.702825	0.666667	0.75045	Not Significant
Paca-F_PAPAN	PCMV/PRV vs 3-month protocol	0.698586	1	1	Not Significant
NAPRT_PAPAN	PCMV/PRV vs 3-month protocol	0.69764	0.116667	0.212888	Not Significant
B2M_PAPAN	PCMV/PRV vs 3-month protocol	0.697056	0.183333	0.290889	Not Significant
CYBB_PAPAN	PCMV/PRV vs 3-month protocol	0.695696	0.183333	0.290889	Not Significant
USO1_PAPAN	PCMV/PRV vs 3-month protocol	0.685824	0.183333	0.290889	Not Significant
RPS20_PIG	PCMV/PRV vs 3-month protocol	0.66893	0.383333	0.502465	Not Significant
TBXAS1_PAPAN	PCMV/PRV vs 3-month protocol	0.668451	0.383333	0.502465	Not Significant
RIPOR2_PAPAN	PCMV/PRV vs 3-month protocol	0.667462	0.183333	0.290889	Not Significant
LOC106510200_PIG	PCMV/PRV vs 3-month protocol	0.657443	0.516667	0.621941	Not Significant
IQGAP1_PIG	PCMV/PRV vs 3-month protocol	0.656313	0.0166667	0.057727	Not Significant
B4GALNT1_PAPAN	PCMV/PRV vs 3-month protocol	0.653987	0.183333	0.290889	Not Significant
LCP1_PAPAN	PCMV/PRV vs 3-month protocol	0.650732	0.266667	0.385314	Not Significant
ACSL1_PAPAN	PCMV/PRV vs 3-month protocol	0.642457	0.266667	0.385314	Not Significant
IGFBP2_PAPAN	PCMV/PRV vs 3-month protocol	0.637978	0.383333	0.502465	Not Significant
COL3A1_PAPAN	PCMV/PRV vs 3-month protocol	0.635123	0.383333	0.502465	Not Significant
MVD_PAPAN	PCMV/PRV vs 3-month protocol	0.628387	0.516667	0.621941	Not Significant
LAMP1_PAPAN	PCMV/PRV vs 3-month protocol	0.625523	0.0666667	0.142029	Not Significant
HSPA5_PAPAN	PCMV/PRV vs 3-month protocol	0.624501	0.183333	0.290889	Not Significant
BLMH_PAPAN	PCMV/PRV vs 3-month protocol	0.622934	0.0666667	0.142029	Not Significant
MAN2A1_PAPAN	PCMV/PRV vs 3-month protocol	0.620919	0.0166667	0.057727	Not Significant
DMGDH_PAPAN	PCMV/PRV vs 3-month protocol	0.620144	0.383333	0.502465	Not Significant
PTGS1_PAPAN	PCMV/PRV vs 3-month protocol	0.619766	0.383333	0.502465	Not Significant
ATP1B3_PAPAN	PCMV/PRV vs 3-month protocol	0.616339	0.0666667	0.142029	Not Significant
IFI6_PAPAN	PCMV/PRV vs 3-month protocol	0.612628	0.833333	0.883726	Not Significant
AIMP2_PAPAN	PCMV/PRV vs 3-month protocol	0.611124	0.116667	0.212888	Not Significant
LMCD1_PAPAN	PCMV/PRV vs 3-month protocol	0.602478	0.183333	0.290889	Not Significant
UROC1_PAPAN	PCMV/PRV vs 3-month protocol	0.600782	0.116667	0.212888	Not Significant
FECH_PAPAN	PCMV/PRV vs 3-month protocol	0.595216	0.116667	0.212888	Not Significant
VAT1_PAPAN	PCMV/PRV vs 3-month protocol	0.593195	0.266667	0.385314	Not Significant
POR_PAPAN	PCMV/PRV vs 3-month protocol	0.591118	0.116667	0.212888	Not Significant
MVP_PAPAN	PCMV/PRV vs 3-month protocol	0.582242	0.383333	0.502465	Not Significant
ERP29_PAPAN	PCMV/PRV vs 3-month protocol	0.578842	0.116667	0.212888	Not Significant
TNNI2_PIG	PCMV/PRV vs 3-month protocol	0.578404	1	1	Not Significant
STEAP4_PAPAN	PCMV/PRV vs 3-month protocol	0.577036	0.183333	0.290889	Not Significant
EHHADH_PAPAN	PCMV/PRV vs 3-month protocol	0.575972	0.383333	0.502465	Not Significant
CAPN2_PAPAN	PCMV/PRV vs 3-month protocol	0.574194	0.183333	0.290889	Not Significant
G6PD_PIG	PCMV/PRV vs 3-month protocol	0.573877	0.383333	0.502465	Not Significant
ART4_PAPAN	PCMV/PRV vs 3-month protocol	0.571879	0.0666667	0.142029	Not Significant
ATP6V1C2_PAPAN	PCMV/PRV vs 3-month protocol	0.571215	0.183333	0.290889	Not Significant
PRDX6_PAPAN	PCMV/PRV vs 3-month protocol	0.56	0.266667	0.385314	Not Significant
KRT8_PIG	PCMV/PRV vs 3-month protocol	0.559427	0.516667	0.621941	Not Significant
ANXA5_PAPAN	PCMV/PRV vs 3-month protocol	0.555602	0.383333	0.502465	Not Significant
RCSD1_PAPAN	PCMV/PRV vs 3-month protocol	0.5514	0.383333	0.502465	Not Significant
STC1_PAPAN	PCMV/PRV vs 3-month protocol	0.548145	0.383333	0.502465	Not Significant
BCL2L13_PAPAN	PCMV/PRV vs 3-month protocol	0.547466	0.266667	0.385314	Not Significant
ME1_PIG	PCMV/PRV vs 3-month protocol	0.546942	0.383333	0.502465	Not Significant
S100A8_PAPAN	PCMV/PRV vs 3-month protocol	0.54633	1	1	Not Significant
NLRX1_PAPAN	PCMV/PRV vs 3-month protocol	0.539234	0.833333	0.883726	Not Significant
EMILIN2_PAPAN	PCMV/PRV vs 3-month protocol	0.538697	0.516667	0.621941	Not Significant
HIP1R_PIG	PCMV/PRV vs 3-month protocol	0.534884	0.516667	0.621941	Not Significant
TTYH3_PAPAN	PCMV/PRV vs 3-month protocol	0.531618	0.833333	0.883726	Not Significant
TPM1_PIG	PCMV/PRV vs 3-month protocol	0.531196	0.666667	0.75045	Not Significant
CYB5R2_PAPAN	PCMV/PRV vs 3-month protocol	0.530505	0.116667	0.212888	Not Significant
NAP1L4_PAPAN	PCMV/PRV vs 3-month protocol	0.527556	0.516667	0.621941	Not Significant
PSMD3_PAPAN	PCMV/PRV vs 3-month protocol	0.524943	0.266667	0.385314	Not Significant
PIK3R4_PAPAN	PCMV/PRV vs 3-month protocol	0.508072	0.266667	0.385314	Not Significant
KRT85_PAPAN	PCMV/PRV vs 3-month protocol	0.50466	1	1	Not Significant
CA2_PAPAN	PCMV/PRV vs 3-month protocol	0.504578	0.383333	0.502465	Not Significant
HOGA1_PAPAN	PCMV/PRV vs 3-month protocol	0.494833	0.666667	0.75045	Not Significant
MYO1G_PAPAN	PCMV/PRV vs 3-month protocol	0.492155	0.116667	0.212888	Not Significant
TXNDC5_PAPAN	PCMV/PRV vs 3-month protocol	0.491288	0.383333	0.502465	Not Significant
TRIM25_PAPAN	PCMV/PRV vs 3-month protocol	0.490413	0.0666667	0.142029	Not Significant
IL1RN_PAPAN	PCMV/PRV vs 3-month protocol	0.48563	0.516667	0.621941	Not Significant
EIF5B_PAPAN	PCMV/PRV vs 3-month protocol	0.481249	0.516667	0.621941	Not Significant
AGRN_PAPAN	PCMV/PRV vs 3-month protocol	0.480636	0.0666667	0.142029	Not Significant
ITGA6_PAPAN	PCMV/PRV vs 3-month protocol	0.475531	0.516667	0.621941	Not Significant
CKMT1B_PAPAN	PCMV/PRV vs 3-month protocol	0.474992	0.666667	0.75045	Not Significant
PDIA6_PAPAN	PCMV/PRV vs 3-month protocol	0.473676	0.266667	0.385314	Not Significant
MAN2A1_PIG	PCMV/PRV vs 3-month protocol	0.472177	0.266667	0.385314	Not Significant
SLC25A5_PIG	PCMV/PRV vs 3-month protocol	0.471408	0.383333	0.502465	Not Significant
GOLGA4_PAPAN	PCMV/PRV vs 3-month protocol	0.468426	0.383333	0.502465	Not Significant
METTL7A_PAPAN	PCMV/PRV vs 3-month protocol	0.465177	0.383333	0.502465	Not Significant
CS_PAPAN	PCMV/PRV vs 3-month protocol	0.460714	0.383333	0.502465	Not Significant
BLVRB_PAPAN	PCMV/PRV vs 3-month protocol	0.458533	0.833333	0.883726	Not Significant
MDH1_PIG	PCMV/PRV vs 3-month protocol	0.456543	0.516667	0.621941	Not Significant
GARS1_PAPAN	PCMV/PRV vs 3-month protocol	0.456213	0.266667	0.385314	Not Significant
CYP51A1_PAPAN	PCMV/PRV vs 3-month protocol	0.456039	0.383333	0.502465	Not Significant
HNRNPA3_PIG	PCMV/PRV vs 3-month protocol	0.455215	0.116667	0.212888	Not Significant
TXNRD1_PAPAN	PCMV/PRV vs 3-month protocol	0.454018	0.516667	0.621941	Not Significant
DSG3_PAPAN	PCMV/PRV vs 3-month protocol	0.451603	0.666667	0.75045	Not Significant
AMDHD2_PAPAN	PCMV/PRV vs 3-month protocol	0.451528	0.383333	0.502465	Not Significant
CLIC3_PAPAN	PCMV/PRV vs 3-month protocol	0.449244	1	1	Not Significant
SCPEP1_PAPAN	PCMV/PRV vs 3-month protocol	0.439955	0.183333	0.290889	Not Significant
COL6A1_PIG	PCMV/PRV vs 3-month protocol	0.438161	0.383333	0.502465	Not Significant
DKK2_PAPAN	PCMV/PRV vs 3-month protocol	0.436478	1	1	Not Significant
SLC16A1_PAPAN	PCMV/PRV vs 3-month protocol	0.434106	0.516667	0.621941	Not Significant
ITGB1_PAPAN	PCMV/PRV vs 3-month protocol	0.432955	0.383333	0.502465	Not Significant
GPS1_PAPAN	PCMV/PRV vs 3-month protocol	0.430581	0.183333	0.290889	Not Significant
CORO1C_PIG	PCMV/PRV vs 3-month protocol	0.428431	0.516667	0.621941	Not Significant
HSPH1_PAPAN	PCMV/PRV vs 3-month protocol	0.426897	0.383333	0.502465	Not Significant
APIP_PAPAN	PCMV/PRV vs 3-month protocol	0.424458	0.266667	0.385314	Not Significant
PECAM1_PAPAN	PCMV/PRV vs 3-month protocol	0.419834	0.516667	0.621941	Not Significant
ERAP1_PAPAN	PCMV/PRV vs 3-month protocol	0.418566	0.516667	0.621941	Not Significant
CALR_PAPAN	PCMV/PRV vs 3-month protocol	0.418324	0.266667	0.385314	Not Significant
TPM3_PIG	PCMV/PRV vs 3-month protocol	0.416698	0.0666667	0.142029	Not Significant
ALDOC_PAPAN	PCMV/PRV vs 3-month protocol	0.410825	0.383333	0.502465	Not Significant
H1-5_PAPAN	PCMV/PRV vs 3-month protocol	0.408796	0.666667	0.75045	Not Significant
SLC3A2_PAPAN	PCMV/PRV vs 3-month protocol	0.406023	0.516667	0.621941	Not Significant
KRT77_PAPAN	PCMV/PRV vs 3-month protocol	0.405781	0.666667	0.75045	Not Significant
CTSV_PAPAN	PCMV/PRV vs 3-month protocol	0.40276	1	1	Not Significant
CYFIP1_PAPAN	PCMV/PRV vs 3-month protocol	0.39331	0.266667	0.385314	Not Significant
TSNAX_PAPAN	PCMV/PRV vs 3-month protocol	0.392334	0.516667	0.621941	Not Significant
FBP1_PIG	PCMV/PRV vs 3-month protocol	0.391747	0.666667	0.75045	Not Significant
PFKL_PAPAN	PCMV/PRV vs 3-month protocol	0.388597	0.266667	0.385314	Not Significant
PLXNB2_PAPAN	PCMV/PRV vs 3-month protocol	0.387423	0.383333	0.502465	Not Significant
GLS_PIG	PCMV/PRV vs 3-month protocol	0.386886	0.516667	0.621941	Not Significant
NID1_PAPAN	PCMV/PRV vs 3-month protocol	0.386127	0.383333	0.502465	Not Significant
SERPINB1_PAPAN	PCMV/PRV vs 3-month protocol	0.385619	0.833333	0.883726	Not Significant
GLOD4_PAPAN	PCMV/PRV vs 3-month protocol	0.381542	0.116667	0.212888	Not Significant
ANXA8_PIG	PCMV/PRV vs 3-month protocol	0.380411	0.666667	0.75045	Not Significant
ITGB3_PAPAN	PCMV/PRV vs 3-month protocol	0.379605	0.666667	0.75045	Not Significant
RARS1_PAPAN	PCMV/PRV vs 3-month protocol	0.373781	0.383333	0.502465	Not Significant
HBZ_PAPAN	PCMV/PRV vs 3-month protocol	0.372943	0.833333	0.883726	Not Significant
SLC2A14_PAPAN	PCMV/PRV vs 3-month protocol	0.367151	0.516667	0.621941	Not Significant
BST1_PAPAN	PCMV/PRV vs 3-month protocol	0.36255	0.516667	0.621941	Not Significant
HSD17B10_PAPAN	PCMV/PRV vs 3-month protocol	0.360191	0.666667	0.75045	Not Significant
CA1_PAPAN	PCMV/PRV vs 3-month protocol	0.358921	0.383333	0.502465	Not Significant
MYO18A_PAPAN	PCMV/PRV vs 3-month protocol	0.35831	1	1	Not Significant
SLC44A2_PAPAN	PCMV/PRV vs 3-month protocol	0.355868	0.516667	0.621941	Not Significant
HYOU1_PAPAN	PCMV/PRV vs 3-month protocol	0.353882	0.266667	0.385314	Not Significant
VIM_PAPAN	PCMV/PRV vs 3-month protocol	0.353707	0.383333	0.502465	Not Significant
CMTM5_PAPAN	PCMV/PRV vs 3-month protocol	0.35205	0.383333	0.502465	Not Significant
HADHA_PAPAN	PCMV/PRV vs 3-month protocol	0.351482	0.116667	0.212888	Not Significant
FLNA_PIG	PCMV/PRV vs 3-month protocol	0.350777	0.666667	0.75045	Not Significant
WDR1_PAPAN	PCMV/PRV vs 3-month protocol	0.34229	0.666667	0.75045	Not Significant
FMNL1_PAPAN	PCMV/PRV vs 3-month protocol	0.341839	0.383333	0.502465	Not Significant
SSB_PIG	PCMV/PRV vs 3-month protocol	0.334974	0.666667	0.75045	Not Significant
EIF2B4_PAPAN	PCMV/PRV vs 3-month protocol	0.333389	0.666667	0.75045	Not Significant
TSKU_PAPAN	PCMV/PRV vs 3-month protocol	0.333345	0.833333	0.883726	Not Significant
RAB8B_PAPAN	PCMV/PRV vs 3-month protocol	0.332981	0.266667	0.385314	Not Significant
FERMT3_PAPAN	PCMV/PRV vs 3-month protocol	0.330512	0.666667	0.75045	Not Significant
CUL3_PAPAN	PCMV/PRV vs 3-month protocol	0.328491	0.516667	0.621941	Not Significant
LOC100522401_PIG	PCMV/PRV vs 3-month protocol	0.321177	0.833333	0.883726	Not Significant
MFAP4_PAPAN	PCMV/PRV vs 3-month protocol	0.31581	1	1	Not Significant
RPL7A_PIG	PCMV/PRV vs 3-month protocol	0.315344	0.833333	0.883726	Not Significant
GOLM1_PAPAN	PCMV/PRV vs 3-month protocol	0.31255	0.833333	0.883726	Not Significant
PRELP_PAPAN	PCMV/PRV vs 3-month protocol	0.30592	0.516667	0.621941	Not Significant
MYOM2_PAPAN	PCMV/PRV vs 3-month protocol	0.301945	1	1	Not Significant
STAP2_PIG	PCMV/PRV vs 3-month protocol	0.301364	0.516667	0.621941	Not Significant
SNRPE_PIG	PCMV/PRV vs 3-month protocol	0.301324	0.833333	0.883726	Not Significant
SLK_PAPAN	PCMV/PRV vs 3-month protocol	0.292828	0.833333	0.883726	Not Significant
LRRC47_PAPAN	PCMV/PRV vs 3-month protocol	0.290672	0.833333	0.883726	Not Significant
PLA1A_PAPAN	PCMV/PRV vs 3-month protocol	0.289279	0.516667	0.621941	Not Significant
ZNF185_PAPAN	PCMV/PRV vs 3-month protocol	0.286799	0.516667	0.621941	Not Significant
MAN2C1_PAPAN	PCMV/PRV vs 3-month protocol	0.284319	1	1	Not Significant
TNFRSF6B_PAPAN	PCMV/PRV vs 3-month protocol	0.282257	0.666667	0.75045	Not Significant
EIF3A_PAPAN	PCMV/PRV vs 3-month protocol	0.278185	1	1	Not Significant
KRT32_PAPAN	PCMV/PRV vs 3-month protocol	0.265496	0.516667	0.621941	Not Significant
GZMB_PAPAN	PCMV/PRV vs 3-month protocol	0.260092	0.833333	0.883726	Not Significant
FGL1_PAPAN	PCMV/PRV vs 3-month protocol	0.25788	0.833333	0.883726	Not Significant
NOLC1_PAPAN	PCMV/PRV vs 3-month protocol	0.25528	1	1	Not Significant
CD44_PAPAN	PCMV/PRV vs 3-month protocol	0.252507	0.516667	0.621941	Not Significant
CD55_PAPAN	PCMV/PRV vs 3-month protocol	0.252405	0.666667	0.75045	Not Significant
STXBP3_PAPAN	PCMV/PRV vs 3-month protocol	0.251083	0.383333	0.502465	Not Significant
CAPG_PAPAN	PCMV/PRV vs 3-month protocol	0.250803	0.516667	0.621941	Not Significant
ITGA2B_PAPAN	PCMV/PRV vs 3-month protocol	0.247131	1	1	Not Significant
CR1L_PAPAN	PCMV/PRV vs 3-month protocol	0.246409	0.516667	0.621941	Not Significant
ARF5_PIG	PCMV/PRV vs 3-month protocol	0.245483	0.516667	0.621941	Not Significant
ENG_PAPAN	PCMV/PRV vs 3-month protocol	0.24355	0.383333	0.502465	Not Significant
PGP_PAPAN	PCMV/PRV vs 3-month protocol	0.241934	0.666667	0.75045	Not Significant
SFTPB_PAPAN	PCMV/PRV vs 3-month protocol	0.241783	1	1	Not Significant
PDCD6_PIG	PCMV/PRV vs 3-month protocol	0.241599	0.383333	0.502465	Not Significant
LEMD2_PAPAN	PCMV/PRV vs 3-month protocol	0.240054	0.666667	0.75045	Not Significant
ANXA4_PAPAN	PCMV/PRV vs 3-month protocol	0.235792	0.383333	0.502465	Not Significant
TARS1_PAPAN	PCMV/PRV vs 3-month protocol	0.235407	0.516667	0.621941	Not Significant
KRT16_PAPAN	PCMV/PRV vs 3-month protocol	0.234649	0.833333	0.883726	Not Significant
PODN_PAPAN	PCMV/PRV vs 3-month protocol	0.232609	0.516667	0.621941	Not Significant
LDB3_PAPAN	PCMV/PRV vs 3-month protocol	0.224588	0.516667	0.621941	Not Significant
THBD_PAPAN	PCMV/PRV vs 3-month protocol	0.222839	0.666667	0.75045	Not Significant
DDX17_PAPAN	PCMV/PRV vs 3-month protocol	0.21953	0.666667	0.75045	Not Significant
CPNE3_PAPAN	PCMV/PRV vs 3-month protocol	0.210598	1	1	Not Significant
GCLM_PAPAN	PCMV/PRV vs 3-month protocol	0.210478	0.833333	0.883726	Not Significant
PLA2G4E_PAPAN	PCMV/PRV vs 3-month protocol	0.207879	1	1	Not Significant
PLCG2_PAPAN	PCMV/PRV vs 3-month protocol	0.207239	0.516667	0.621941	Not Significant
THBS2_PAPAN	PCMV/PRV vs 3-month protocol	0.198305	0.666667	0.75045	Not Significant
NHERF1_PAPAN	PCMV/PRV vs 3-month protocol	0.191582	0.833333	0.883726	Not Significant
ANPEP_PAPAN	PCMV/PRV vs 3-month protocol	0.187389	0.516667	0.621941	Not Significant
ARIH1_PIG	PCMV/PRV vs 3-month protocol	0.185491	0.666667	0.75045	Not Significant
CPA4_PAPAN	PCMV/PRV vs 3-month protocol	0.183914	0.833333	0.883726	Not Significant
CKAP4_PAPAN	PCMV/PRV vs 3-month protocol	0.181733	0.516667	0.621941	Not Significant
SCARB2_PAPAN	PCMV/PRV vs 3-month protocol	0.178506	0.833333	0.883726	Not Significant
PEBP1_PAPAN	PCMV/PRV vs 3-month protocol	0.178357	0.516667	0.621941	Not Significant
ADD1_PAPAN	PCMV/PRV vs 3-month protocol	0.177603	0.666667	0.75045	Not Significant
COX7A2L_PAPAN	PCMV/PRV vs 3-month protocol	0.173246	0.666667	0.75045	Not Significant
SQOR_PAPAN	PCMV/PRV vs 3-month protocol	0.172926	0.666667	0.75045	Not Significant
CTSG_PAPAN	PCMV/PRV vs 3-month protocol	0.170254	1	1	Not Significant
ACTN4_PAPAN	PCMV/PRV vs 3-month protocol	0.170212	1	1	Not Significant
MYO1F_PAPAN	PCMV/PRV vs 3-month protocol	0.169245	0.666667	0.75045	Not Significant
SMPD3_PAPAN	PCMV/PRV vs 3-month protocol	0.168838	1	1	Not Significant
RPL15_PIG	PCMV/PRV vs 3-month protocol	0.166929	0.666667	0.75045	Not Significant
ALAD_PAPAN	PCMV/PRV vs 3-month protocol	0.166268	1	1	Not Significant
GSR_PAPAN	PCMV/PRV vs 3-month protocol	0.163416	0.666667	0.75045	Not Significant
BID_PAPAN	PCMV/PRV vs 3-month protocol	0.163036	0.516667	0.621941	Not Significant
HEBP1_PAPAN	PCMV/PRV vs 3-month protocol	0.160949	1	1	Not Significant
MARCKSL1_PAPAN	PCMV/PRV vs 3-month protocol	0.156867	0.516667	0.621941	Not Significant
TIMP1_PAPAN	PCMV/PRV vs 3-month protocol	0.148499	1	1	Not Significant
THOP1_PAPAN	PCMV/PRV vs 3-month protocol	0.14312	0.833333	0.883726	Not Significant
FKBP4_PAPAN	PCMV/PRV vs 3-month protocol	0.139081	1	1	Not Significant
PRDX2_PAPAN	PCMV/PRV vs 3-month protocol	0.137968	0.666667	0.75045	Not Significant
TGFBI_PAPAN	PCMV/PRV vs 3-month protocol	0.135894	1	1	Not Significant
RNH1_PAPAN	PCMV/PRV vs 3-month protocol	0.133196	0.833333	0.883726	Not Significant
CANX_PAPAN	PCMV/PRV vs 3-month protocol	0.130216	0.833333	0.883726	Not Significant
HK3_PAPAN	PCMV/PRV vs 3-month protocol	0.127788	0.666667	0.75045	Not Significant
APOH_PIG	PCMV/PRV vs 3-month protocol	0.127637	1	1	Not Significant
CHI3L1_PIG	PCMV/PRV vs 3-month protocol	0.125434	0.383333	0.502465	Not Significant
ANGPTL3_PAPAN	PCMV/PRV vs 3-month protocol	0.124343	0.833333	0.883726	Not Significant
FLNB_PIG	PCMV/PRV vs 3-month protocol	0.118409	1	1	Not Significant
SEPTIN2_PAPAN	PCMV/PRV vs 3-month protocol	0.112689	0.833333	0.883726	Not Significant
THBS4_PIG	PCMV/PRV vs 3-month protocol	0.109102	1	1	Not Significant
RAN_PIG	PCMV/PRV vs 3-month protocol	0.106505	0.666667	0.75045	Not Significant
EMILIN1_PAPAN	PCMV/PRV vs 3-month protocol	0.105083	0.833333	0.883726	Not Significant
ADH5_PAPAN	PCMV/PRV vs 3-month protocol	0.102016	1	1	Not Significant
ME2_PAPAN	PCMV/PRV vs 3-month protocol	0.0952833	0.666667	0.75045	Not Significant
ITGA4_PAPAN	PCMV/PRV vs 3-month protocol	0.0942265	0.833333	0.883726	Not Significant
SEMA7A_PAPAN	PCMV/PRV vs 3-month protocol	0.0907292	0.666667	0.75045	Not Significant
NRGN_PAPAN	PCMV/PRV vs 3-month protocol	0.0903877	0.516667	0.621941	Not Significant
PSMC6_PIG	PCMV/PRV vs 3-month protocol	0.0889493	0.833333	0.883726	Not Significant
S100A9_PAPAN	PCMV/PRV vs 3-month protocol	0.0875958	0.833333	0.883726	Not Significant
GLO1_PAPAN	PCMV/PRV vs 3-month protocol	0.0860077	1	1	Not Significant
GPX1_PAPAN	PCMV/PRV vs 3-month protocol	0.0841269	0.833333	0.883726	Not Significant
KRAS_PIG	PCMV/PRV vs 3-month protocol	0.0817598	1	1	Not Significant
WAS_PAPAN	PCMV/PRV vs 3-month protocol	0.0813084	0.666667	0.75045	Not Significant
CHI3L1_PAPAN	PCMV/PRV vs 3-month protocol	0.0778989	1	1	Not Significant
COL1A1_PAPAN	PCMV/PRV vs 3-month protocol	0.0741311	0.833333	0.883726	Not Significant
TCOF1_PAPAN	PCMV/PRV vs 3-month protocol	0.0725264	1	1	Not Significant
GAA_PAPAN	PCMV/PRV vs 3-month protocol	0.0710771	0.833333	0.883726	Not Significant
NARS1_PAPAN	PCMV/PRV vs 3-month protocol	0.0705909	1	1	Not Significant
ENTPD5_PAPAN	PCMV/PRV vs 3-month protocol	0.0686209	0.516667	0.621941	Not Significant
LMNB1_PAPAN	PCMV/PRV vs 3-month protocol	0.0665188	0.833333	0.883726	Not Significant
RETN_PAPAN	PCMV/PRV vs 3-month protocol	0.0618638	0.833333	0.883726	Not Significant
PTK6_PAPAN	PCMV/PRV vs 3-month protocol	0.0582711	0.516667	0.621941	Not Significant
POGLUT2_PAPAN	PCMV/PRV vs 3-month protocol	0.0547149	1	1	Not Significant
FLII_PAPAN	PCMV/PRV vs 3-month protocol	0.0544915	0.666667	0.75045	Not Significant
PPP1CC_PIG	PCMV/PRV vs 3-month protocol	0.0507721	1	1	Not Significant
RPL5_PAPAN	PCMV/PRV vs 3-month protocol	0.05049	1	1	Not Significant
UBA1_PAPAN	PCMV/PRV vs 3-month protocol	0.0481958	1	1	Not Significant
ADM_PAPAN	PCMV/PRV vs 3-month protocol	0.0428068	1	1	Not Significant
NIF3L1_PAPAN	PCMV/PRV vs 3-month protocol	0.0427206	1	1	Not Significant
RPL14_PIG	PCMV/PRV vs 3-month protocol	0.0418242	1	1	Not Significant
PSMD1_PAPAN	PCMV/PRV vs 3-month protocol	0.0388351	1	1	Not Significant
SERPINA12_PAPAN	PCMV/PRV vs 3-month protocol	0.0386824	1	1	Not Significant
CYP4V2_PAPAN	PCMV/PRV vs 3-month protocol	0.0374646	0.833333	0.883726	Not Significant
COL6A2_PAPAN	PCMV/PRV vs 3-month protocol	0.0370849	1	1	Not Significant
LTA4H_PAPAN	PCMV/PRV vs 3-month protocol	0.0370735	1	1	Not Significant
C1QB_PIG	PCMV/PRV vs 3-month protocol	0.036587	1	1	Not Significant
VCL_PAPAN	PCMV/PRV vs 3-month protocol	0.0344564	0.833333	0.883726	Not Significant
NUDT5_PAPAN	PCMV/PRV vs 3-month protocol	0.0328334	1	1	Not Significant
LGALS3BP_PAPAN	PCMV/PRV vs 3-month protocol	0.0272251	0.833333	0.883726	Not Significant
ACTN2_PAPAN	PCMV/PRV vs 3-month protocol	0.0272141	1	1	Not Significant
PLAT_PAPAN	PCMV/PRV vs 3-month protocol	0.0264745	1	1	Not Significant
ST3GAL1_PAPAN	PCMV/PRV vs 3-month protocol	0.0236599	1	1	Not Significant
PHGDH_PAPAN	PCMV/PRV vs 3-month protocol	0.0226228	0.833333	0.883726	Not Significant
LAMC1_PAPAN	PCMV/PRV vs 3-month protocol	0.0201463	1	1	Not Significant
EHD3_PAPAN	PCMV/PRV vs 3-month protocol	0.0199706	0.666667	0.75045	Not Significant
TM9SF2_PAPAN	PCMV/PRV vs 3-month protocol	0.0194629	0.833333	0.883726	Not Significant
RNPEP_PAPAN	PCMV/PRV vs 3-month protocol	0.0194149	0.666667	0.75045	Not Significant
GGCT_PAPAN	PCMV/PRV vs 3-month protocol	0.0188272	0.833333	0.883726	Not Significant
PSMD5_PAPAN	PCMV/PRV vs 3-month protocol	0.00950135	1	1	Not Significant
HCFC1_PIG	PCMV/PRV vs 3-month protocol	0.00906207	0.833333	0.883726	Not Significant
DES_PIG	PCMV/PRV vs 3-month protocol	0.00582836	1	1	Not Significant
NCAM1_PIG	PCMV/PRV vs 3-month protocol	0.00399228	1	1	Not Significant
ACADVL_PAPAN	PCMV/PRV vs 3-month protocol	0.000665435	0.833333	0.883726	Not Significant
ALDH8A1_PAPAN	PCMV/PRV vs 3-month protocol	-0.00089117	0.833333	0.883726	Not Significant
RNF123_PAPAN	PCMV/PRV vs 3-month protocol	-0.0028355	1	1	Not Significant
LMNB2_PAPAN	PCMV/PRV vs 3-month protocol	-0.00634537	1	1	Not Significant
SLC16A3_PAPAN	PCMV/PRV vs 3-month protocol	-0.00848911	1	1	Not Significant
GALNT7_PAPAN	PCMV/PRV vs 3-month protocol	-0.0104834	0.833333	0.883726	Not Significant
PPID_PIG	PCMV/PRV vs 3-month protocol	-0.0117835	1	1	Not Significant
RBM39_PIG	PCMV/PRV vs 3-month protocol	-0.0212512	0.833333	0.883726	Not Significant
LNPEP_PAPAN	PCMV/PRV vs 3-month protocol	-0.022014	1	1	Not Significant
ZYX_PAPAN	PCMV/PRV vs 3-month protocol	-0.0266123	0.666667	0.75045	Not Significant
KIF13B_PAPAN	PCMV/PRV vs 3-month protocol	-0.0270931	1	1	Not Significant
SLC33A1_PAPAN	PCMV/PRV vs 3-month protocol	-0.0280178	0.833333	0.883726	Not Significant
EPX_PAPAN	PCMV/PRV vs 3-month protocol	-0.0281841	1	1	Not Significant
CLEC14A_PAPAN	PCMV/PRV vs 3-month protocol	-0.0282193	1	1	Not Significant
CTSC_PAPAN	PCMV/PRV vs 3-month protocol	-0.0297965	1	1	Not Significant
JPT2_PAPAN	PCMV/PRV vs 3-month protocol	-0.0299145	0.833333	0.883726	Not Significant
TJP2_PAPAN	PCMV/PRV vs 3-month protocol	-0.0310734	0.833333	0.883726	Not Significant
C16orf54_PAPAN	PCMV/PRV vs 3-month protocol	-0.0334048	1	1	Not Significant
THRAP3_PAPAN	PCMV/PRV vs 3-month protocol	-0.0344043	0.666667	0.75045	Not Significant
VASP_PIG	PCMV/PRV vs 3-month protocol	-0.0360197	0.833333	0.883726	Not Significant
MYOC_PAPAN	PCMV/PRV vs 3-month protocol	-0.0377829	0.833333	0.883726	Not Significant
RNPEP_PIG	PCMV/PRV vs 3-month protocol	-0.0379623	1	1	Not Significant
DPP9_PAPAN	PCMV/PRV vs 3-month protocol	-0.0448192	1	1	Not Significant
KIAA0513_PAPAN	PCMV/PRV vs 3-month protocol	-0.0451191	1	1	Not Significant
TNFSF10_PAPAN	PCMV/PRV vs 3-month protocol	-0.0453884	0.666667	0.75045	Not Significant
SVIL_PAPAN	PCMV/PRV vs 3-month protocol	-0.0480659	0.833333	0.883726	Not Significant
ECHDC1_PAPAN	PCMV/PRV vs 3-month protocol	-0.0485185	1	1	Not Significant
H6PD_PAPAN	PCMV/PRV vs 3-month protocol	-0.0504719	1	1	Not Significant
RAB8A_PIG	PCMV/PRV vs 3-month protocol	-0.0513405	1	1	Not Significant
PAK2_PAPAN	PCMV/PRV vs 3-month protocol	-0.0513714	0.833333	0.883726	Not Significant
DOK3_PAPAN	PCMV/PRV vs 3-month protocol	-0.0566593	0.833333	0.883726	Not Significant
MPST_PAPAN	PCMV/PRV vs 3-month protocol	-0.0570965	1	1	Not Significant
CYP27A1_PAPAN	PCMV/PRV vs 3-month protocol	-0.0580014	1	1	Not Significant
SNED1_PAPAN	PCMV/PRV vs 3-month protocol	-0.0597746	1	1	Not Significant
LIPG_PAPAN	PCMV/PRV vs 3-month protocol	-0.0647258	1	1	Not Significant
BIN2_PAPAN	PCMV/PRV vs 3-month protocol	-0.0678442	0.833333	0.883726	Not Significant
GSS_PAPAN	PCMV/PRV vs 3-month protocol	-0.0752583	0.833333	0.883726	Not Significant
RIPK1_PAPAN	PCMV/PRV vs 3-month protocol	-0.0756007	0.833333	0.883726	Not Significant
FCGR3A_PAPAN	PCMV/PRV vs 3-month protocol	-0.075846	1	1	Not Significant
LGALS3_PIG	PCMV/PRV vs 3-month protocol	-0.0779834	1	1	Not Significant
RPL7_PIG	PCMV/PRV vs 3-month protocol	-0.0782629	0.666667	0.75045	Not Significant
IL36G_PAPAN	PCMV/PRV vs 3-month protocol	-0.0824484	0.833333	0.883726	Not Significant
CORO7_PAPAN	PCMV/PRV vs 3-month protocol	-0.0839036	0.516667	0.621941	Not Significant
AK1_PAPAN	PCMV/PRV vs 3-month protocol	-0.0941878	0.833333	0.883726	Not Significant
HEXA_PAPAN	PCMV/PRV vs 3-month protocol	-0.0947081	1	1	Not Significant
OGDH_PAPAN	PCMV/PRV vs 3-month protocol	-0.0992783	0.833333	0.883726	Not Significant
ENOPH1_PAPAN	PCMV/PRV vs 3-month protocol	-0.103027	1	1	Not Significant
ASPDH_PAPAN	PCMV/PRV vs 3-month protocol	-0.10331	1	1	Not Significant
STAB2_PAPAN	PCMV/PRV vs 3-month protocol	-0.104289	0.833333	0.883726	Not Significant
GART_PIG	PCMV/PRV vs 3-month protocol	-0.104745	1	1	Not Significant
RHOT2_PIG	PCMV/PRV vs 3-month protocol	-0.107104	0.833333	0.883726	Not Significant
PLEKHO2_PAPAN	PCMV/PRV vs 3-month protocol	-0.111598	0.266667	0.385314	Not Significant
GBA1_PAPAN	PCMV/PRV vs 3-month protocol	-0.114436	0.833333	0.883726	Not Significant
APOE_PAPAN	PCMV/PRV vs 3-month protocol	-0.11599	0.833333	0.883726	Not Significant
COL5A3_PIG	PCMV/PRV vs 3-month protocol	-0.121473	0.516667	0.621941	Not Significant
CLEC11A_PAPAN	PCMV/PRV vs 3-month protocol	-0.123672	0.666667	0.75045	Not Significant
PLAA_PAPAN	PCMV/PRV vs 3-month protocol	-0.123858	0.666667	0.75045	Not Significant
PTPN12_PAPAN	PCMV/PRV vs 3-month protocol	-0.124992	0.833333	0.883726	Not Significant
NT5C_PAPAN	PCMV/PRV vs 3-month protocol	-0.134539	0.516667	0.621941	Not Significant
RPS19_PIG	PCMV/PRV vs 3-month protocol	-0.134978	0.666667	0.75045	Not Significant
SLC44A1_PAPAN	PCMV/PRV vs 3-month protocol	-0.135218	0.666667	0.75045	Not Significant
EVPL_PAPAN	PCMV/PRV vs 3-month protocol	-0.13842	1	1	Not Significant
TGM5_PAPAN	PCMV/PRV vs 3-month protocol	-0.138839	0.833333	0.883726	Not Significant
MFGE8_PAPAN	PCMV/PRV vs 3-month protocol	-0.140209	0.833333	0.883726	Not Significant
ARHGAP1_PAPAN	PCMV/PRV vs 3-month protocol	-0.143917	0.833333	0.883726	Not Significant
CKB_PAPAN	PCMV/PRV vs 3-month protocol	-0.160438	0.516667	0.621941	Not Significant
LOXL1_PAPAN	PCMV/PRV vs 3-month protocol	-0.162785	0.516667	0.621941	Not Significant
SLC22A16_PAPAN	PCMV/PRV vs 3-month protocol	-0.164394	1	1	Not Significant
P4HB_PAPAN	PCMV/PRV vs 3-month protocol	-0.166008	0.516667	0.621941	Not Significant
FASN_PIG	PCMV/PRV vs 3-month protocol	-0.166149	0.516667	0.621941	Not Significant
GDF15_PAPAN	PCMV/PRV vs 3-month protocol	-0.169586	0.833333	0.883726	Not Significant
BLVRA_PAPAN	PCMV/PRV vs 3-month protocol	-0.173964	0.666667	0.75045	Not Significant
SPTB_PAPAN	PCMV/PRV vs 3-month protocol	-0.176568	0.516667	0.621941	Not Significant
PALLD_PAPAN	PCMV/PRV vs 3-month protocol	-0.177104	0.833333	0.883726	Not Significant
ARHGEF1_PAPAN	PCMV/PRV vs 3-month protocol	-0.180434	0.666667	0.75045	Not Significant
MADD_PIG	PCMV/PRV vs 3-month protocol	-0.183377	0.666667	0.75045	Not Significant
CRYBG1_PAPAN	PCMV/PRV vs 3-month protocol	-0.185514	0.516667	0.621941	Not Significant
OXSR1_PAPAN	PCMV/PRV vs 3-month protocol	-0.185596	0.666667	0.75045	Not Significant
HNRNPL_PAPAN	PCMV/PRV vs 3-month protocol	-0.186366	0.833333	0.883726	Not Significant
EPB41L2_PAPAN	PCMV/PRV vs 3-month protocol	-0.186736	0.183333	0.290889	Not Significant
NHERF2_PAPAN	PCMV/PRV vs 3-month protocol	-0.18735	0.833333	0.883726	Not Significant
DNMT1_PAPAN	PCMV/PRV vs 3-month protocol	-0.188272	0.833333	0.883726	Not Significant
RAB3GAP2_PAPAN	PCMV/PRV vs 3-month protocol	-0.188834	1	1	Not Significant
CBS_PAPAN	PCMV/PRV vs 3-month protocol	-0.191018	0.666667	0.75045	Not Significant
IARS1_PAPAN	PCMV/PRV vs 3-month protocol	-0.191284	0.833333	0.883726	Not Significant
SSB_PAPAN	PCMV/PRV vs 3-month protocol	-0.192224	0.666667	0.75045	Not Significant
PRPS1_PIG	PCMV/PRV vs 3-month protocol	-0.193483	0.833333	0.883726	Not Significant
TCN2_PAPAN	PCMV/PRV vs 3-month protocol	-0.193703	0.516667	0.621941	Not Significant
SERPINF2_PIG	PCMV/PRV vs 3-month protocol	-0.194468	0.833333	0.883726	Not Significant
PEF1_PIG	PCMV/PRV vs 3-month protocol	-0.194604	0.516667	0.621941	Not Significant
ARHGAP6_PAPAN	PCMV/PRV vs 3-month protocol	-0.202078	0.516667	0.621941	Not Significant
ALPL_PAPAN	PCMV/PRV vs 3-month protocol	-0.205655	0.833333	0.883726	Not Significant
HSBP1_PIG	PCMV/PRV vs 3-month protocol	-0.206883	0.516667	0.621941	Not Significant
MB_PAPAN	PCMV/PRV vs 3-month protocol	-0.210327	0.666667	0.75045	Not Significant
GNPTG_PAPAN	PCMV/PRV vs 3-month protocol	-0.21138	0.516667	0.621941	Not Significant
CD163_PAPAN	PCMV/PRV vs 3-month protocol	-0.211491	0.666667	0.75045	Not Significant
IDE_PAPAN	PCMV/PRV vs 3-month protocol	-0.212155	1	1	Not Significant
ITGAX_PAPAN	PCMV/PRV vs 3-month protocol	-0.215253	0.516667	0.621941	Not Significant
AP3B1_PAPAN	PCMV/PRV vs 3-month protocol	-0.218602	0.266667	0.385314	Not Significant
PPP2R4_PAPAN	PCMV/PRV vs 3-month protocol	-0.219469	0.266667	0.385314	Not Significant
IGLV11-55_PAPAN	PCMV/PRV vs 3-month protocol	-0.223407	1	1	Not Significant
CPB2_PIG	PCMV/PRV vs 3-month protocol	-0.227026	0.383333	0.502465	Not Significant
SEMA4D_PAPAN	PCMV/PRV vs 3-month protocol	-0.227117	0.516667	0.621941	Not Significant
DHRS1_PAPAN	PCMV/PRV vs 3-month protocol	-0.227999	0.833333	0.883726	Not Significant
GANAB_PAPAN	PCMV/PRV vs 3-month protocol	-0.228477	0.833333	0.883726	Not Significant
PXDN_PAPAN	PCMV/PRV vs 3-month protocol	-0.228965	0.666667	0.75045	Not Significant
ALOXE3_PAPAN	PCMV/PRV vs 3-month protocol	-0.229549	0.383333	0.502465	Not Significant
DPYS_PAPAN	PCMV/PRV vs 3-month protocol	-0.229892	0.666667	0.75045	Not Significant
SRSF3_PIG	PCMV/PRV vs 3-month protocol	-0.236837	0.666667	0.75045	Not Significant
CCDC80_PAPAN	PCMV/PRV vs 3-month protocol	-0.242777	0.833333	0.883726	Not Significant
COL6A3_PAPAN	PCMV/PRV vs 3-month protocol	-0.244004	0.516667	0.621941	Not Significant
GDPD3_PAPAN	PCMV/PRV vs 3-month protocol	-0.244386	0.666667	0.75045	Not Significant
FCN1_PAPAN	PCMV/PRV vs 3-month protocol	-0.248463	0.516667	0.621941	Not Significant
CTSB_PAPAN	PCMV/PRV vs 3-month protocol	-0.248878	0.183333	0.290889	Not Significant
CD177_PAPAN	PCMV/PRV vs 3-month protocol	-0.25207	0.666667	0.75045	Not Significant
ICAM2_PAPAN	PCMV/PRV vs 3-month protocol	-0.257845	0.833333	0.883726	Not Significant
RPS13_PIG	PCMV/PRV vs 3-month protocol	-0.264684	0.666667	0.75045	Not Significant
IPO11_PAPAN	PCMV/PRV vs 3-month protocol	-0.267396	0.516667	0.621941	Not Significant
FABP1_PAPAN	PCMV/PRV vs 3-month protocol	-0.268799	0.666667	0.75045	Not Significant
TSPAN33_PAPAN	PCMV/PRV vs 3-month protocol	-0.269241	1	1	Not Significant
FHL1_PIG	PCMV/PRV vs 3-month protocol	-0.273378	0.516667	0.621941	Not Significant
CPXM2_PAPAN	PCMV/PRV vs 3-month protocol	-0.283209	0.666667	0.75045	Not Significant
MMUT_PAPAN	PCMV/PRV vs 3-month protocol	-0.284331	1	1	Not Significant
PCOLCE_PAPAN	PCMV/PRV vs 3-month protocol	-0.284472	0.383333	0.502465	Not Significant
PSMD4_PIG	PCMV/PRV vs 3-month protocol	-0.287173	0.666667	0.75045	Not Significant
ATP5F1A_PIG	PCMV/PRV vs 3-month protocol	-0.291224	1	1	Not Significant
NRDC_PAPAN	PCMV/PRV vs 3-month protocol	-0.292027	0.666667	0.75045	Not Significant
PCSK9_PAPAN	PCMV/PRV vs 3-month protocol	-0.292341	0.666667	0.75045	Not Significant
VCAM1_PAPAN	PCMV/PRV vs 3-month protocol	-0.296284	0.516667	0.621941	Not Significant
MYO1B_PAPAN	PCMV/PRV vs 3-month protocol	-0.296376	0.516667	0.621941	Not Significant
UNC13D_PAPAN	PCMV/PRV vs 3-month protocol	-0.296864	0.666667	0.75045	Not Significant
CYP2A19_PIG	PCMV/PRV vs 3-month protocol	-0.296961	0.383333	0.502465	Not Significant
APEX1_PAPAN	PCMV/PRV vs 3-month protocol	-0.296971	0.383333	0.502465	Not Significant
SCFD1_PAPAN	PCMV/PRV vs 3-month protocol	-0.300611	0.833333	0.883726	Not Significant
MCAM_PAPAN	PCMV/PRV vs 3-month protocol	-0.301755	0.183333	0.290889	Not Significant
TF_PIG	PCMV/PRV vs 3-month protocol	-0.302896	0.833333	0.883726	Not Significant
IFIT3_PAPAN	PCMV/PRV vs 3-month protocol	-0.303474	0.833333	0.883726	Not Significant
COL6A3_PIG	PCMV/PRV vs 3-month protocol	-0.304867	0.266667	0.385314	Not Significant
ITLN1_PAPAN	PCMV/PRV vs 3-month protocol	-0.304978	1	1	Not Significant
CYB5R3_PAPAN	PCMV/PRV vs 3-month protocol	-0.305227	0.266667	0.385314	Not Significant
HLA-DPA1_PAPAN	PCMV/PRV vs 3-month protocol	-0.305873	1	1	Not Significant
RPL27A_PIG	PCMV/PRV vs 3-month protocol	-0.30972	0.516667	0.621941	Not Significant
ECI2_PAPAN	PCMV/PRV vs 3-month protocol	-0.31052	0.516667	0.621941	Not Significant
ANXA11_PAPAN	PCMV/PRV vs 3-month protocol	-0.31188	0.516667	0.621941	Not Significant
PYM1_PAPAN	PCMV/PRV vs 3-month protocol	-0.312822	0.266667	0.385314	Not Significant
SOD1_PAPAN	PCMV/PRV vs 3-month protocol	-0.314291	0.666667	0.75045	Not Significant
ABI3BP_PAPAN	PCMV/PRV vs 3-month protocol	-0.324458	0.383333	0.502465	Not Significant
CLEC12A_PAPAN	PCMV/PRV vs 3-month protocol	-0.328652	0.516667	0.621941	Not Significant
PRCP_PAPAN	PCMV/PRV vs 3-month protocol	-0.329742	0.516667	0.621941	Not Significant
ST6GAL1_PAPAN	PCMV/PRV vs 3-month protocol	-0.329901	0.183333	0.290889	Not Significant
RPL34_PIG	PCMV/PRV vs 3-month protocol	-0.330026	0.383333	0.502465	Not Significant
ACOX2_PAPAN	PCMV/PRV vs 3-month protocol	-0.332171	0.516667	0.621941	Not Significant
MYOF_PAPAN	PCMV/PRV vs 3-month protocol	-0.333254	0.383333	0.502465	Not Significant
PPP5C_PAPAN	PCMV/PRV vs 3-month protocol	-0.334054	0.266667	0.385314	Not Significant
CAMK2D_PIG	PCMV/PRV vs 3-month protocol	-0.334508	0.183333	0.290889	Not Significant
IGF2_PIG	PCMV/PRV vs 3-month protocol	-0.336229	0.516667	0.621941	Not Significant
EPRS1_PAPAN	PCMV/PRV vs 3-month protocol	-0.336696	0.516667	0.621941	Not Significant
TGM2_PAPAN	PCMV/PRV vs 3-month protocol	-0.337273	0.516667	0.621941	Not Significant
GSTP1_PAPAN	PCMV/PRV vs 3-month protocol	-0.337384	0.666667	0.75045	Not Significant
SHPK_PAPAN	PCMV/PRV vs 3-month protocol	-0.337656	0.833333	0.883726	Not Significant
FCN3_PAPAN	PCMV/PRV vs 3-month protocol	-0.340244	0.833333	0.883726	Not Significant
HEXB_PAPAN	PCMV/PRV vs 3-month protocol	-0.340999	0.266667	0.385314	Not Significant
GLB1_PAPAN	PCMV/PRV vs 3-month protocol	-0.346626	0.666667	0.75045	Not Significant
HMGCS1_PAPAN	PCMV/PRV vs 3-month protocol	-0.347375	0.666667	0.75045	Not Significant
SLC22A1_PAPAN	PCMV/PRV vs 3-month protocol	-0.349752	0.666667	0.75045	Not Significant
MYH2_PAPAN	PCMV/PRV vs 3-month protocol	-0.35108	0.516667	0.621941	Not Significant
SLIT2_PAPAN	PCMV/PRV vs 3-month protocol	-0.354604	0.516667	0.621941	Not Significant
PGM3_PAPAN	PCMV/PRV vs 3-month protocol	-0.354782	0.383333	0.502465	Not Significant
AKR1A1_PAPAN	PCMV/PRV vs 3-month protocol	-0.354838	0.516667	0.621941	Not Significant
LTB4R_PAPAN	PCMV/PRV vs 3-month protocol	-0.355256	0.666667	0.75045	Not Significant
CMPK1_PAPAN	PCMV/PRV vs 3-month protocol	-0.355605	0.516667	0.621941	Not Significant
ALDH3A2_PAPAN	PCMV/PRV vs 3-month protocol	-0.358277	0.666667	0.75045	Not Significant
LAMA2_PAPAN	PCMV/PRV vs 3-month protocol	-0.35856	0.666667	0.75045	Not Significant
RNF213_PAPAN	PCMV/PRV vs 3-month protocol	-0.35935	0.516667	0.621941	Not Significant
MAP4_PAPAN	PCMV/PRV vs 3-month protocol	-0.36011	0.516667	0.621941	Not Significant
CCT2_PAPAN	PCMV/PRV vs 3-month protocol	-0.36051	0.266667	0.385314	Not Significant
NIBAN2_PAPAN	PCMV/PRV vs 3-month protocol	-0.361455	0.516667	0.621941	Not Significant
NT5E_PAPAN	PCMV/PRV vs 3-month protocol	-0.362396	0.116667	0.212888	Not Significant
TSPAN9_PAPAN	PCMV/PRV vs 3-month protocol	-0.363859	0.266667	0.385314	Not Significant
CTSD_PIG	PCMV/PRV vs 3-month protocol	-0.366619	0.383333	0.502465	Not Significant
TNC_PAPAN	PCMV/PRV vs 3-month protocol	-0.366897	0.383333	0.502465	Not Significant
PPM1F_PAPAN	PCMV/PRV vs 3-month protocol	-0.367179	0.266667	0.385314	Not Significant
SUCLG2_PAPAN	PCMV/PRV vs 3-month protocol	-0.372834	0.516667	0.621941	Not Significant
GLA_PAPAN	PCMV/PRV vs 3-month protocol	-0.373144	0.0666667	0.142029	Not Significant
EPPK1_PIG	PCMV/PRV vs 3-month protocol	-0.374761	0.183333	0.290889	Not Significant
ALPK3_PAPAN	PCMV/PRV vs 3-month protocol	-0.377218	0.516667	0.621941	Not Significant
SERPINB10_PAPAN	PCMV/PRV vs 3-month protocol	-0.377327	0.383333	0.502465	Not Significant
COMP_PAPAN	PCMV/PRV vs 3-month protocol	-0.380455	0.383333	0.502465	Not Significant
LTBP1_PAPAN	PCMV/PRV vs 3-month protocol	-0.38205	0.833333	0.883726	Not Significant
CXCL9_PAPAN	PCMV/PRV vs 3-month protocol	-0.383338	0.666667	0.75045	Not Significant
STK10_PAPAN	PCMV/PRV vs 3-month protocol	-0.38502	0.0333333	0.0862319	Not Significant
PRG2_PAPAN	PCMV/PRV vs 3-month protocol	-0.385732	0.266667	0.385314	Not Significant
TLN1_PAPAN	PCMV/PRV vs 3-month protocol	-0.390085	0.666667	0.75045	Not Significant
DPYSL2_PAPAN	PCMV/PRV vs 3-month protocol	-0.390223	0.383333	0.502465	Not Significant
UBR4_PAPAN	PCMV/PRV vs 3-month protocol	-0.393343	0.266667	0.385314	Not Significant
UBA6_PAPAN	PCMV/PRV vs 3-month protocol	-0.39836	0.666667	0.75045	Not Significant
ABAT_PAPAN	PCMV/PRV vs 3-month protocol	-0.399704	0.266667	0.385314	Not Significant
CFH_PIG	PCMV/PRV vs 3-month protocol	-0.40163	0.516667	0.621941	Not Significant
KRT82_PAPAN	PCMV/PRV vs 3-month protocol	-0.401726	0.666667	0.75045	Not Significant
CDK11_PIG	PCMV/PRV vs 3-month protocol	-0.402651	0.266667	0.385314	Not Significant
TREML1_PAPAN	PCMV/PRV vs 3-month protocol	-0.404335	0.383333	0.502465	Not Significant
DDC_PAPAN	PCMV/PRV vs 3-month protocol	-0.405151	0.383333	0.502465	Not Significant
MBL2_PAPAN	PCMV/PRV vs 3-month protocol	-0.405341	0.183333	0.290889	Not Significant
COL5A3_PAPAN	PCMV/PRV vs 3-month protocol	-0.406667	0.116667	0.212888	Not Significant
CFL1_PIG	PCMV/PRV vs 3-month protocol	-0.406781	0.383333	0.502465	Not Significant
TUT7_PAPAN	PCMV/PRV vs 3-month protocol	-0.410678	0.666667	0.75045	Not Significant
FGR_PAPAN	PCMV/PRV vs 3-month protocol	-0.410737	0.833333	0.883726	Not Significant
SPTB_PIG	PCMV/PRV vs 3-month protocol	-0.411249	0.383333	0.502465	Not Significant
LARS1_PAPAN	PCMV/PRV vs 3-month protocol	-0.411281	0.516667	0.621941	Not Significant
RPS15_PIG	PCMV/PRV vs 3-month protocol	-0.412528	0.516667	0.621941	Not Significant
UBE2O_PAPAN	PCMV/PRV vs 3-month protocol	-0.412992	0.383333	0.502465	Not Significant
PFN1_PAPAN	PCMV/PRV vs 3-month protocol	-0.413529	0.516667	0.621941	Not Significant
NEO1_PAPAN	PCMV/PRV vs 3-month protocol	-0.418033	0.183333	0.290889	Not Significant
CCT6A_PAPAN	PCMV/PRV vs 3-month protocol	-0.418951	0.183333	0.290889	Not Significant
ACADS_PAPAN	PCMV/PRV vs 3-month protocol	-0.419085	0.516667	0.621941	Not Significant
INF2_PIG	PCMV/PRV vs 3-month protocol	-0.420451	0.516667	0.621941	Not Significant
ACP5_PAPAN	PCMV/PRV vs 3-month protocol	-0.421147	0.0333333	0.0862319	Not Significant
ADAMDEC1_PAPAN	PCMV/PRV vs 3-month protocol	-0.421786	0.0666667	0.142029	Not Significant
CTSL_PAPAN	PCMV/PRV vs 3-month protocol	-0.422044	0.383333	0.502465	Not Significant
CTNNA1_PAPAN	PCMV/PRV vs 3-month protocol	-0.42515	0.666667	0.75045	Not Significant
SSBP1_PAPAN	PCMV/PRV vs 3-month protocol	-0.425251	0.0666667	0.142029	Not Significant
B3GNT7_PAPAN	PCMV/PRV vs 3-month protocol	-0.426399	1	1	Not Significant
NDRG2_PAPAN	PCMV/PRV vs 3-month protocol	-0.426781	0.516667	0.621941	Not Significant
GCN1_PAPAN	PCMV/PRV vs 3-month protocol	-0.428648	0.516667	0.621941	Not Significant
UBAP2L_PIG	PCMV/PRV vs 3-month protocol	-0.433559	0.666667	0.75045	Not Significant
PTPRB_PAPAN	PCMV/PRV vs 3-month protocol	-0.436245	0.266667	0.385314	Not Significant
CCN1_PAPAN	PCMV/PRV vs 3-month protocol	-0.43845	0.516667	0.621941	Not Significant
MGAT1_PIG	PCMV/PRV vs 3-month protocol	-0.439408	0.183333	0.290889	Not Significant
ETHE1_PAPAN	PCMV/PRV vs 3-month protocol	-0.441689	0.183333	0.290889	Not Significant
NCCRP1_PAPAN	PCMV/PRV vs 3-month protocol	-0.442813	0.833333	0.883726	Not Significant
PKP1_PAPAN	PCMV/PRV vs 3-month protocol	-0.442943	0.516667	0.621941	Not Significant
CLEC5A_PAPAN	PCMV/PRV vs 3-month protocol	-0.444566	0.666667	0.75045	Not Significant
PCYT2_PAPAN	PCMV/PRV vs 3-month protocol	-0.446234	0.516667	0.621941	Not Significant
GSTK1_PAPAN	PCMV/PRV vs 3-month protocol	-0.448265	0.183333	0.290889	Not Significant
MMP2_PAPAN	PCMV/PRV vs 3-month protocol	-0.448333	0.383333	0.502465	Not Significant
FNTA_PAPAN	PCMV/PRV vs 3-month protocol	-0.448393	0.0666667	0.142029	Not Significant
NUP205_PAPAN	PCMV/PRV vs 3-month protocol	-0.449095	0.833333	0.883726	Not Significant
LTBP4_PAPAN	PCMV/PRV vs 3-month protocol	-0.453097	0.116667	0.212888	Not Significant
DARS1_PAPAN	PCMV/PRV vs 3-month protocol	-0.453251	0.383333	0.502465	Not Significant
FAM114A1_PAPAN	PCMV/PRV vs 3-month protocol	-0.453579	0.383333	0.502465	Not Significant
HCK_PAPAN	PCMV/PRV vs 3-month protocol	-0.455364	0.383333	0.502465	Not Significant
GOT1_PIG	PCMV/PRV vs 3-month protocol	-0.455593	0.266667	0.385314	Not Significant
EEA1_PAPAN	PCMV/PRV vs 3-month protocol	-0.45708	1	1	Not Significant
SCUBE3_PAPAN	PCMV/PRV vs 3-month protocol	-0.458977	0.266667	0.385314	Not Significant
SQOR_PIG	PCMV/PRV vs 3-month protocol	-0.461807	1	1	Not Significant
NUCB1_PIG	PCMV/PRV vs 3-month protocol	-0.46363	0.266667	0.385314	Not Significant
BBOX1_PAPAN	PCMV/PRV vs 3-month protocol	-0.467051	0.116667	0.212888	Not Significant
RPL13A_PIG	PCMV/PRV vs 3-month protocol	-0.469874	0.516667	0.621941	Not Significant
TOR1B_PAPAN	PCMV/PRV vs 3-month protocol	-0.473632	0.266667	0.385314	Not Significant
TPRG1_PAPAN	PCMV/PRV vs 3-month protocol	-0.473634	0.383333	0.502465	Not Significant
CD99_PAPAN	PCMV/PRV vs 3-month protocol	-0.473812	0.516667	0.621941	Not Significant
RNF39_PAPAN	PCMV/PRV vs 3-month protocol	-0.474263	0.183333	0.290889	Not Significant
SPARCL1_PAPAN	PCMV/PRV vs 3-month protocol	-0.482045	0.383333	0.502465	Not Significant
COL14A1_PAPAN	PCMV/PRV vs 3-month protocol	-0.486481	0.266667	0.385314	Not Significant
SPP1_PAPAN	PCMV/PRV vs 3-month protocol	-0.487144	0.383333	0.502465	Not Significant
ERP44_PAPAN	PCMV/PRV vs 3-month protocol	-0.487575	0.0333333	0.0862319	Not Significant
MMP10_PAPAN	PCMV/PRV vs 3-month protocol	-0.489234	0.383333	0.502465	Not Significant
MOB3A_PAPAN	PCMV/PRV vs 3-month protocol	-0.490399	0.383333	0.502465	Not Significant
TNKS1BP1_PAPAN	PCMV/PRV vs 3-month protocol	-0.491847	0.383333	0.502465	Not Significant
NPNT_PAPAN	PCMV/PRV vs 3-month protocol	-0.492443	0.383333	0.502465	Not Significant
RBM8A_PIG	PCMV/PRV vs 3-month protocol	-0.492803	0.266667	0.385314	Not Significant
CD109_PAPAN	PCMV/PRV vs 3-month protocol	-0.495283	0.516667	0.621941	Not Significant
CRYL1_PAPAN	PCMV/PRV vs 3-month protocol	-0.496342	0.266667	0.385314	Not Significant
MAP2K3_PAPAN	PCMV/PRV vs 3-month protocol	-0.497132	0.266667	0.385314	Not Significant
MINPP1_PAPAN	PCMV/PRV vs 3-month protocol	-0.500264	0.116667	0.212888	Not Significant
TREH_PAPAN	PCMV/PRV vs 3-month protocol	-0.503015	0.666667	0.75045	Not Significant
MYH9_PAPAN	PCMV/PRV vs 3-month protocol	-0.505362	0.266667	0.385314	Not Significant
CAP1_PAPAN	PCMV/PRV vs 3-month protocol	-0.507083	0.383333	0.502465	Not Significant
SEMA4G_PAPAN	PCMV/PRV vs 3-month protocol	-0.508167	0.183333	0.290889	Not Significant
PLBD1_PAPAN	PCMV/PRV vs 3-month protocol	-0.508855	0.266667	0.385314	Not Significant
PIGR_PAPAN	PCMV/PRV vs 3-month protocol	-0.509469	0.516667	0.621941	Not Significant
PDCD10_PIG	PCMV/PRV vs 3-month protocol	-0.510184	0.266667	0.385314	Not Significant
SERPINF1_PIG	PCMV/PRV vs 3-month protocol	-0.510351	0.383333	0.502465	Not Significant
NCF1_PAPAN	PCMV/PRV vs 3-month protocol	-0.510447	0.383333	0.502465	Not Significant
SLC25A24_PAPAN	PCMV/PRV vs 3-month protocol	-0.510596	0.266667	0.385314	Not Significant
FBN1_PIG	PCMV/PRV vs 3-month protocol	-0.511542	0.383333	0.502465	Not Significant
RNF126_PIG	PCMV/PRV vs 3-month protocol	-0.511953	0.516667	0.621941	Not Significant
CDC42BPB_PIG	PCMV/PRV vs 3-month protocol	-0.512748	0.666667	0.75045	Not Significant
AP3D1_PAPAN	PCMV/PRV vs 3-month protocol	-0.514976	0.0166667	0.057727	Not Significant
SHTN1_PAPAN	PCMV/PRV vs 3-month protocol	-0.516136	0.266667	0.385314	Not Significant
IGFBP4_PAPAN	PCMV/PRV vs 3-month protocol	-0.519086	0.266667	0.385314	Not Significant
ATP5F1C_PAPAN	PCMV/PRV vs 3-month protocol	-0.524078	0.383333	0.502465	Not Significant
PTPRF_PIG	PCMV/PRV vs 3-month protocol	-0.524487	0.266667	0.385314	Not Significant
SYNE2_PAPAN	PCMV/PRV vs 3-month protocol	-0.524557	0.266667	0.385314	Not Significant
VASP_PAPAN	PCMV/PRV vs 3-month protocol	-0.52905	0.266667	0.385314	Not Significant
CCT5_PAPAN	PCMV/PRV vs 3-month protocol	-0.532667	0.116667	0.212888	Not Significant
ITGA7_PAPAN	PCMV/PRV vs 3-month protocol	-0.534573	0.266667	0.385314	Not Significant
STC2_PAPAN	PCMV/PRV vs 3-month protocol	-0.543593	0.516667	0.621941	Not Significant
IFI16_PAPAN	PCMV/PRV vs 3-month protocol	-0.54659	0.266667	0.385314	Not Significant
FETUB_PAPAN	PCMV/PRV vs 3-month protocol	-0.550063	0.516667	0.621941	Not Significant
PGLS_PAPAN	PCMV/PRV vs 3-month protocol	-0.550076	0.116667	0.212888	Not Significant
QARS1_PAPAN	PCMV/PRV vs 3-month protocol	-0.550162	0.383333	0.502465	Not Significant
CAPN5_PAPAN	PCMV/PRV vs 3-month protocol	-0.552671	0.516667	0.621941	Not Significant
XYLT1_PIG	PCMV/PRV vs 3-month protocol	-0.553131	0.116667	0.212888	Not Significant
OAF_PAPAN	PCMV/PRV vs 3-month protocol	-0.553268	0.266667	0.385314	Not Significant
ARHGAP45_PIG	PCMV/PRV vs 3-month protocol	-0.553391	0.266667	0.385314	Not Significant
CLIP1_PAPAN	PCMV/PRV vs 3-month protocol	-0.555001	0.0666667	0.142029	Not Significant
OIT3_PAPAN	PCMV/PRV vs 3-month protocol	-0.561074	0.183333	0.290889	Not Significant
GPNMB_PAPAN	PCMV/PRV vs 3-month protocol	-0.56267	0.116667	0.212888	Not Significant
FPR1_PAPAN	PCMV/PRV vs 3-month protocol	-0.563822	0.116667	0.212888	Not Significant
RPS10_PIG	PCMV/PRV vs 3-month protocol	-0.56467	0.0666667	0.142029	Not Significant
OSMR_PAPAN	PCMV/PRV vs 3-month protocol	-0.564844	0.383333	0.502465	Not Significant
SQSTM1_PAPAN	PCMV/PRV vs 3-month protocol	-0.567642	0.266667	0.385314	Not Significant
MOGS_PAPAN	PCMV/PRV vs 3-month protocol	-0.574004	0.116667	0.212888	Not Significant
PLCB3_PIG	PCMV/PRV vs 3-month protocol	-0.574395	0.383333	0.502465	Not Significant
ADAMTSL2_PAPAN	PCMV/PRV vs 3-month protocol	-0.575105	0.266667	0.385314	Not Significant
NT5DC1_PAPAN	PCMV/PRV vs 3-month protocol	-0.575987	0.183333	0.290889	Not Significant
ACADM_PAPAN	PCMV/PRV vs 3-month protocol	-0.58218	0.183333	0.290889	Not Significant
MAN1C1_PAPAN	PCMV/PRV vs 3-month protocol	-0.582228	0.183333	0.290889	Not Significant
MYOM1_PAPAN	PCMV/PRV vs 3-month protocol	-0.582643	0.516667	0.621941	Not Significant
SPTA1_PAPAN	PCMV/PRV vs 3-month protocol	-0.585799	0.183333	0.290889	Not Significant
PPA2_PAPAN	PCMV/PRV vs 3-month protocol	-0.589387	0.116667	0.212888	Not Significant
IL6R_PAPAN	PCMV/PRV vs 3-month protocol	-0.589966	0.266667	0.385314	Not Significant
CSPG4_PIG	PCMV/PRV vs 3-month protocol	-0.590025	0.183333	0.290889	Not Significant
CAP2_PAPAN	PCMV/PRV vs 3-month protocol	-0.592415	0.0333333	0.0862319	Not Significant
COPA_PAPAN	PCMV/PRV vs 3-month protocol	-0.593758	0.0333333	0.0862319	Not Significant
ADHFE1_PAPAN	PCMV/PRV vs 3-month protocol	-0.593781	0.266667	0.385314	Not Significant
IGLV3-9_PAPAN	PCMV/PRV vs 3-month protocol	-0.59396	0.666667	0.75045	Not Significant
C1S_PIG	PCMV/PRV vs 3-month protocol	-0.59936	0.383333	0.502465	Not Significant
NMRAL1_PAPAN	PCMV/PRV vs 3-month protocol	-0.601722	0.183333	0.290889	Not Significant
PDCD11_PAPAN	PCMV/PRV vs 3-month protocol	-0.60441	0.183333	0.290889	Not Significant
IGLV3-10_PAPAN	PCMV/PRV vs 3-month protocol	-0.604945	0.666667	0.75045	Not Significant
ECHDC3_PAPAN	PCMV/PRV vs 3-month protocol	-0.605926	0.183333	0.290889	Not Significant
TSG101_PAPAN	PCMV/PRV vs 3-month protocol	-0.607156	0.183333	0.290889	Not Significant
CARS2_PAPAN	PCMV/PRV vs 3-month protocol	-0.611956	0.0666667	0.142029	Not Significant
MRC1_PAPAN	PCMV/PRV vs 3-month protocol	-0.612622	0.383333	0.502465	Not Significant
ICAM3_PAPAN	PCMV/PRV vs 3-month protocol	-0.616321	0.116667	0.212888	Not Significant
CAPN3_PAPAN	PCMV/PRV vs 3-month protocol	-0.616755	0.266667	0.385314	Not Significant
RPS15A_PIG	PCMV/PRV vs 3-month protocol	-0.621814	0.183333	0.290889	Not Significant
SAMD9_PAPAN	PCMV/PRV vs 3-month protocol	-0.621893	0.266667	0.385314	Not Significant
NT5C3A_PAPAN	PCMV/PRV vs 3-month protocol	-0.624055	0.0666667	0.142029	Not Significant
TOR4A_PAPAN	PCMV/PRV vs 3-month protocol	-0.624297	0.116667	0.212888	Not Significant
LETM1_PAPAN	PCMV/PRV vs 3-month protocol	-0.625199	0.0666667	0.142029	Not Significant
HEPHL1_PAPAN	PCMV/PRV vs 3-month protocol	-0.625935	0.516667	0.621941	Not Significant
IPO4_PAPAN	PCMV/PRV vs 3-month protocol	-0.626023	0.116667	0.212888	Not Significant
PEPD_PAPAN	PCMV/PRV vs 3-month protocol	-0.627902	0.116667	0.212888	Not Significant
FGFBP2_PAPAN	PCMV/PRV vs 3-month protocol	-0.628562	0.516667	0.621941	Not Significant
IGFBP7_PAPAN	PCMV/PRV vs 3-month protocol	-0.629426	0.0166667	0.057727	Not Significant
S100A3_PAPAN	PCMV/PRV vs 3-month protocol	-0.63075	0.116667	0.212888	Not Significant
SRRM2_PAPAN	PCMV/PRV vs 3-month protocol	-0.630754	0.383333	0.502465	Not Significant
RABL6_PAPAN	PCMV/PRV vs 3-month protocol	-0.632519	0.266667	0.385314	Not Significant
RASAL3_PAPAN	PCMV/PRV vs 3-month protocol	-0.634958	0.183333	0.290889	Not Significant
SERPINA11_PAPAN	PCMV/PRV vs 3-month protocol	-0.636221	0.266667	0.385314	Not Significant
ANKRD2_PAPAN	PCMV/PRV vs 3-month protocol	-0.638031	0.183333	0.290889	Not Significant
ABCF1_PAPAN	PCMV/PRV vs 3-month protocol	-0.638416	0.266667	0.385314	Not Significant
DSG2_PAPAN	PCMV/PRV vs 3-month protocol	-0.643561	0.266667	0.385314	Not Significant
PTPRJ_PAPAN	PCMV/PRV vs 3-month protocol	-0.644173	0.383333	0.502465	Not Significant
IGFALS_PIG	PCMV/PRV vs 3-month protocol	-0.644385	0.666667	0.75045	Not Significant
BUB3_PIG	PCMV/PRV vs 3-month protocol	-0.646282	0.383333	0.502465	Not Significant
IMPA1_PAPAN	PCMV/PRV vs 3-month protocol	-0.649553	0.183333	0.290889	Not Significant
B4GALT1_PAPAN	PCMV/PRV vs 3-month protocol	-0.650999	0.183333	0.290889	Not Significant
NOTUM_PAPAN	PCMV/PRV vs 3-month protocol	-0.65414	0.183333	0.290889	Not Significant
IARS2_PAPAN	PCMV/PRV vs 3-month protocol	-0.654823	0.383333	0.502465	Not Significant
CPA1_PAPAN	PCMV/PRV vs 3-month protocol	-0.65604	0.183333	0.290889	Not Significant
SNRNP70_PAPAN	PCMV/PRV vs 3-month protocol	-0.656105	0.383333	0.502465	Not Significant
LSS_PAPAN	PCMV/PRV vs 3-month protocol	-0.656387	0.0166667	0.057727	Not Significant
ALB_PIG	PCMV/PRV vs 3-month protocol	-0.657938	0.266667	0.385314	Not Significant
MYH10_PAPAN	PCMV/PRV vs 3-month protocol	-0.659116	0.266667	0.385314	Not Significant
S100P_PAPAN	PCMV/PRV vs 3-month protocol	-0.65969	0.183333	0.290889	Not Significant
ARMT1_PAPAN	PCMV/PRV vs 3-month protocol	-0.666048	0.0333333	0.0862319	Not Significant
VNN1_PAPAN	PCMV/PRV vs 3-month protocol	-0.666282	0.183333	0.290889	Not Significant
TBC1D10B_PAPAN	PCMV/PRV vs 3-month protocol	-0.670376	0.266667	0.385314	Not Significant
ALCAM_PAPAN	PCMV/PRV vs 3-month protocol	-0.672551	0.383333	0.502465	Not Significant
HADHB_PAPAN	PCMV/PRV vs 3-month protocol	-0.673323	0.183333	0.290889	Not Significant
FUCA2_PAPAN	PCMV/PRV vs 3-month protocol	-0.678446	0.183333	0.290889	Not Significant
SPP2_PAPAN	PCMV/PRV vs 3-month protocol	-0.679557	0.116667	0.212888	Not Significant
DNASE1L3_PAPAN	PCMV/PRV vs 3-month protocol	-0.680436	0.116667	0.212888	Not Significant
SYPL1_PAPAN	PCMV/PRV vs 3-month protocol	-0.68075	0.0333333	0.0862319	Not Significant
LGALS3BP_PIG	PCMV/PRV vs 3-month protocol	-0.682734	0.516667	0.621941	Not Significant
CHGA_PAPAN	PCMV/PRV vs 3-month protocol	-0.685076	1	1	Not Significant
COL12A1_PAPAN	PCMV/PRV vs 3-month protocol	-0.686259	0.183333	0.290889	Not Significant
CTSH_PAPAN	PCMV/PRV vs 3-month protocol	-0.686437	0.183333	0.290889	Not Significant
SERPING1_PIG	PCMV/PRV vs 3-month protocol	-0.687147	0.183333	0.290889	Not Significant
NDRG1_PIG	PCMV/PRV vs 3-month protocol	-0.688991	0.266667	0.385314	Not Significant
GP1BA_PAPAN	PCMV/PRV vs 3-month protocol	-0.690786	0.266667	0.385314	Not Significant
EML2_PAPAN	PCMV/PRV vs 3-month protocol	-0.691201	0.0166667	0.057727	Not Significant
UNC45A_PAPAN	PCMV/PRV vs 3-month protocol	-0.692228	0.266667	0.385314	Not Significant
A2ML1_PAPAN	PCMV/PRV vs 3-month protocol	-0.695041	0.383333	0.502465	Not Significant
RPL17_PIG	PCMV/PRV vs 3-month protocol	-0.696474	0.183333	0.290889	Not Significant
VWF_PAPAN	PCMV/PRV vs 3-month protocol	-0.69731	0.516667	0.621941	Not Significant
FES_PAPAN	PCMV/PRV vs 3-month protocol	-0.698213	0.0166667	0.057727	Not Significant
POSTN_PAPAN	PCMV/PRV vs 3-month protocol	-0.698401	0.183333	0.290889	Not Significant
ARG1_PAPAN	PCMV/PRV vs 3-month protocol	-0.699707	0.383333	0.502465	Not Significant
CDH1_PAPAN	PCMV/PRV vs 3-month protocol	-0.700121	0.0166667	0.057727	Not Significant
IGFBPL1_PAPAN	PCMV/PRV vs 3-month protocol	-0.703059	0.266667	0.385314	Not Significant
ECM2_PAPAN	PCMV/PRV vs 3-month protocol	-0.703735	0.266667	0.385314	Not Significant
PTPRF_PAPAN	PCMV/PRV vs 3-month protocol	-0.705582	0.183333	0.290889	Not Significant
DSP_PAPAN	PCMV/PRV vs 3-month protocol	-0.712519	0.383333	0.502465	Not Significant
ADAMTSL4_PAPAN	PCMV/PRV vs 3-month protocol	-0.713486	0.266667	0.385314	Not Significant
SPINK5_PAPAN	PCMV/PRV vs 3-month protocol	-0.713603	0.183333	0.290889	Not Significant
QSOX1_PIG	PCMV/PRV vs 3-month protocol	-0.713944	0.116667	0.212888	Not Significant
TOLLIP_PAPAN	PCMV/PRV vs 3-month protocol	-0.71638	0.183333	0.290889	Not Significant
SDR16C5_PAPAN	PCMV/PRV vs 3-month protocol	-0.71659	0.116667	0.212888	Not Significant
LDHB_PIG	PCMV/PRV vs 3-month protocol	-0.717417	0.266667	0.385314	Not Significant
WNK1_PAPAN	PCMV/PRV vs 3-month protocol	-0.718268	0.183333	0.290889	Not Significant
LRPPRC_PAPAN	PCMV/PRV vs 3-month protocol	-0.72063	0.183333	0.290889	Not Significant
GSTM4_PAPAN	PCMV/PRV vs 3-month protocol	-0.720915	0.383333	0.502465	Not Significant
ENPP2_PAPAN	PCMV/PRV vs 3-month protocol	-0.723708	0.0166667	0.057727	Not Significant
ERMAP_PAPAN	PCMV/PRV vs 3-month protocol	-0.724878	0.0666667	0.142029	Not Significant
C2_PIG	PCMV/PRV vs 3-month protocol	-0.725682	0.0666667	0.142029	Not Significant
NRP2_PAPAN	PCMV/PRV vs 3-month protocol	-0.728923	0.183333	0.290889	Not Significant
CHGB_PAPAN	PCMV/PRV vs 3-month protocol	-0.729552	0.183333	0.290889	Not Significant
COL6A6_PAPAN	PCMV/PRV vs 3-month protocol	-0.732172	0.116667	0.212888	Not Significant
ABCA12_PAPAN	PCMV/PRV vs 3-month protocol	-0.732429	0.383333	0.502465	Not Significant
CACNA2D1_PAPAN	PCMV/PRV vs 3-month protocol	-0.733393	0.383333	0.502465	Not Significant
RO60_PAPAN	PCMV/PRV vs 3-month protocol	-0.737805	0.116667	0.212888	Not Significant
STAMBPL1_PAPAN	PCMV/PRV vs 3-month protocol	-0.739991	0.116667	0.212888	Not Significant
FN1_PIG	PCMV/PRV vs 3-month protocol	-0.742744	0.0666667	0.142029	Not Significant
MANBA_PAPAN	PCMV/PRV vs 3-month protocol	-0.746891	0.183333	0.290889	Not Significant
APOBEC2_PAPAN	PCMV/PRV vs 3-month protocol	-0.74959	0.183333	0.290889	Not Significant
SNX6_PIG	PCMV/PRV vs 3-month protocol	-0.751696	0.183333	0.290889	Not Significant
TIE1_PAPAN	PCMV/PRV vs 3-month protocol	-0.751841	0.0333333	0.0862319	Not Significant
EXT2_PAPAN	PCMV/PRV vs 3-month protocol	-0.752146	0.0666667	0.142029	Not Significant
SERPINF1_PAPAN	PCMV/PRV vs 3-month protocol	-0.753418	0.0666667	0.142029	Not Significant
PKM_PIG	PCMV/PRV vs 3-month protocol	-0.753678	0.383333	0.502465	Not Significant
GOLGB1_PAPAN	PCMV/PRV vs 3-month protocol	-0.758396	0.183333	0.290889	Not Significant
PC_PAPAN	PCMV/PRV vs 3-month protocol	-0.758998	0.183333	0.290889	Not Significant
PGAM2_PAPAN	PCMV/PRV vs 3-month protocol	-0.760627	0.516667	0.621941	Not Significant
ADGRG6_PAPAN	PCMV/PRV vs 3-month protocol	-0.768993	0.116667	0.212888	Not Significant
HDDC2_PAPAN	PCMV/PRV vs 3-month protocol	-0.772568	0.116667	0.212888	Not Significant
MMP3_PAPAN	PCMV/PRV vs 3-month protocol	-0.774557	0.383333	0.502465	Not Significant
COPB1_PAPAN	PCMV/PRV vs 3-month protocol	-0.782553	0.0166667	0.057727	Not Significant
ACSS3_PAPAN	PCMV/PRV vs 3-month protocol	-0.782614	0.383333	0.502465	Not Significant
DTYMK_PAPAN	PCMV/PRV vs 3-month protocol	-0.78326	0.116667	0.212888	Not Significant
UGGT1_PAPAN	PCMV/PRV vs 3-month protocol	-0.784837	0.0666667	0.142029	Not Significant
THBS4_PAPAN	PCMV/PRV vs 3-month protocol	-0.786828	0.0166667	0.057727	Not Significant
FAHD1_PAPAN	PCMV/PRV vs 3-month protocol	-0.787358	0.183333	0.290889	Not Significant
AP2A2_PAPAN	PCMV/PRV vs 3-month protocol	-0.787524	0.266667	0.385314	Not Significant
PLEC_PIG	PCMV/PRV vs 3-month protocol	-0.788418	0.0333333	0.0862319	Not Significant
RUVBL2_PIG	PCMV/PRV vs 3-month protocol	-0.79229	0.183333	0.290889	Not Significant
EIF4H_PIG	PCMV/PRV vs 3-month protocol	-0.792623	0.0166667	0.057727	Not Significant
DCAF8_PAPAN	PCMV/PRV vs 3-month protocol	-0.794548	0.116667	0.212888	Not Significant
ANGPTL8_PAPAN	PCMV/PRV vs 3-month protocol	-0.796753	0.116667	0.212888	Not Significant
LAMA3_PAPAN	PCMV/PRV vs 3-month protocol	-0.80035	0.666667	0.75045	Not Significant
ANGPTL4_PAPAN	PCMV/PRV vs 3-month protocol	-0.803194	0.183333	0.290889	Not Significant
FGGY_PAPAN	PCMV/PRV vs 3-month protocol	-0.803365	0.266667	0.385314	Not Significant
MAN1A1_PAPAN	PCMV/PRV vs 3-month protocol	-0.806044	0.0666667	0.142029	Not Significant
LANCL2_PAPAN	PCMV/PRV vs 3-month protocol	-0.806548	0.116667	0.212888	Not Significant
DYNC1H1_PAPAN	PCMV/PRV vs 3-month protocol	-0.809279	0.0166667	0.057727	Not Significant
FGD3_PAPAN	PCMV/PRV vs 3-month protocol	-0.812298	0.266667	0.385314	Not Significant
IQGAP2_PAPAN	PCMV/PRV vs 3-month protocol	-0.812678	0.0333333	0.0862319	Not Significant
GRK6_PAPAN	PCMV/PRV vs 3-month protocol	-0.816249	0.0333333	0.0862319	Not Significant
UQCRC2_PAPAN	PCMV/PRV vs 3-month protocol	-0.818095	0.383333	0.502465	Not Significant
CFHR5_PAPAN	PCMV/PRV vs 3-month protocol	-0.819765	0.266667	0.385314	Not Significant
C1R_PAPAN	PCMV/PRV vs 3-month protocol	-0.820612	0.0666667	0.142029	Not Significant
PRKCD_PAPAN	PCMV/PRV vs 3-month protocol	-0.822049	0.116667	0.212888	Not Significant
SAMD14_PAPAN	PCMV/PRV vs 3-month protocol	-0.823909	0.0666667	0.142029	Not Significant
TBCA_PAPAN	PCMV/PRV vs 3-month protocol	-0.824961	0.0666667	0.142029	Not Significant
PRKDC_PAPAN	PCMV/PRV vs 3-month protocol	-0.825356	0.0666667	0.142029	Not Significant
MACF1_PAPAN	PCMV/PRV vs 3-month protocol	-0.825872	0.516667	0.621941	Not Significant
MYBPC2_PAPAN	PCMV/PRV vs 3-month protocol	-0.828234	0.666667	0.75045	Not Significant
APOB_PIG	PCMV/PRV vs 3-month protocol	-0.828307	0.266667	0.385314	Not Significant
GMPR_PAPAN	PCMV/PRV vs 3-month protocol	-0.828655	0.383333	0.502465	Not Significant
CD226_PAPAN	PCMV/PRV vs 3-month protocol	-0.829614	0.0666667	0.142029	Not Significant
LCN2_PAPAN	PCMV/PRV vs 3-month protocol	-0.833805	0.383333	0.502465	Not Significant
SEMA4B_PAPAN	PCMV/PRV vs 3-month protocol	-0.834316	0.0666667	0.142029	Not Significant
MYH6_PAPAN	PCMV/PRV vs 3-month protocol	-0.838353	0.383333	0.502465	Not Significant
MAN2A2_PAPAN	PCMV/PRV vs 3-month protocol	-0.839183	0.116667	0.212888	Not Significant
APOA4_PIG	PCMV/PRV vs 3-month protocol	-0.839881	0.266667	0.385314	Not Significant
S100A16_PAPAN	PCMV/PRV vs 3-month protocol	-0.840987	0.266667	0.385314	Not Significant
TWF2_PAPAN	PCMV/PRV vs 3-month protocol	-0.84338	0.0166667	0.057727	Not Significant
LAMB1_PAPAN	PCMV/PRV vs 3-month protocol	-0.844687	0.116667	0.212888	Not Significant
TGM1_PAPAN	PCMV/PRV vs 3-month protocol	-0.844781	0.0666667	0.142029	Not Significant
AACS_PAPAN	PCMV/PRV vs 3-month protocol	-0.845957	0.516667	0.621941	Not Significant
RPS7_PIG	PCMV/PRV vs 3-month protocol	-0.849711	0.0666667	0.142029	Not Significant
FCHSD1_PAPAN	PCMV/PRV vs 3-month protocol	-0.84999	0.0166667	0.057727	Not Significant
UGT3A1_PAPAN	PCMV/PRV vs 3-month protocol	-0.852796	0.183333	0.290889	Not Significant
EPHA1_PAPAN	PCMV/PRV vs 3-month protocol	-0.854114	0.116667	0.212888	Not Significant
ACADSB_PAPAN	PCMV/PRV vs 3-month protocol	-0.854253	0.516667	0.621941	Not Significant
MVB12A_PAPAN	PCMV/PRV vs 3-month protocol	-0.85871	0.0166667	0.057727	Not Significant
IPO5_PAPAN	PCMV/PRV vs 3-month protocol	-0.860063	0.0166667	0.057727	Not Significant
PDAP1_PIG	PCMV/PRV vs 3-month protocol	-0.86137	0.0166667	0.057727	Not Significant
CR2_PAPAN	PCMV/PRV vs 3-month protocol	-0.864788	0.666667	0.75045	Not Significant
UBE2N_PAPAN	PCMV/PRV vs 3-month protocol	-0.866974	0.183333	0.290889	Not Significant
NUMA1_PIG	PCMV/PRV vs 3-month protocol	-0.867442	0.116667	0.212888	Not Significant
C1R_PIG	PCMV/PRV vs 3-month protocol	-0.867901	0.116667	0.212888	Not Significant
ACP7_PAPAN	PCMV/PRV vs 3-month protocol	-0.873673	0.383333	0.502465	Not Significant
POSTN_PIG	PCMV/PRV vs 3-month protocol	-0.873734	0.183333	0.290889	Not Significant
NSFL1C_PAPAN	PCMV/PRV vs 3-month protocol	-0.873859	0.183333	0.290889	Not Significant
GGH_PAPAN	PCMV/PRV vs 3-month protocol	-0.875425	0.0166667	0.057727	Not Significant
CTPS1_PAPAN	PCMV/PRV vs 3-month protocol	-0.875742	0.0166667	0.057727	Not Significant
PLXNB1_PAPAN	PCMV/PRV vs 3-month protocol	-0.877682	0.0666667	0.142029	Not Significant
PARVB_PAPAN	PCMV/PRV vs 3-month protocol	-0.8777	0.0666667	0.142029	Not Significant
PPL_PAPAN	PCMV/PRV vs 3-month protocol	-0.877823	0.0333333	0.0862319	Not Significant
SNAP23_PAPAN	PCMV/PRV vs 3-month protocol	-0.878124	0.183333	0.290889	Not Significant
COL18A1_PIG	PCMV/PRV vs 3-month protocol	-0.880225	0.0333333	0.0862319	Not Significant
KLHDC4_PAPAN	PCMV/PRV vs 3-month protocol	-0.881608	0.0666667	0.142029	Not Significant
F13A1_PAPAN	PCMV/PRV vs 3-month protocol	-0.885317	0.0666667	0.142029	Not Significant
SEMA4A_PAPAN	PCMV/PRV vs 3-month protocol	-0.885931	0.116667	0.212888	Not Significant
PCOLCE_PIG	PCMV/PRV vs 3-month protocol	-0.888133	0.266667	0.385314	Not Significant
ADGRF5_PAPAN	PCMV/PRV vs 3-month protocol	-0.889776	0.183333	0.290889	Not Significant
ENTPD6_PAPAN	PCMV/PRV vs 3-month protocol	-0.890255	0.116667	0.212888	Not Significant
TPM4_PIG	PCMV/PRV vs 3-month protocol	-0.891012	0.0666667	0.142029	Not Significant
ERO1A_PAPAN	PCMV/PRV vs 3-month protocol	-0.89163	0.183333	0.290889	Not Significant
MPST_PIG	PCMV/PRV vs 3-month protocol	-0.89201	0.116667	0.212888	Not Significant
SPTBN1_PAPAN	PCMV/PRV vs 3-month protocol	-0.895239	0.0666667	0.142029	Not Significant
OGN_PAPAN	PCMV/PRV vs 3-month protocol	-0.896728	0.116667	0.212888	Not Significant
SEC23IP_PAPAN	PCMV/PRV vs 3-month protocol	-0.896956	0.0333333	0.0862319	Not Significant
ABCB6_PAPAN	PCMV/PRV vs 3-month protocol	-0.89835	0.266667	0.385314	Not Significant
SERPING1_PAPAN	PCMV/PRV vs 3-month protocol	-0.898712	0.116667	0.212888	Not Significant
AIFM1_PAPAN	PCMV/PRV vs 3-month protocol	-0.901212	0.0166667	0.057727	Not Significant
JUP_PAPAN	PCMV/PRV vs 3-month protocol	-0.911851	0.266667	0.385314	Not Significant
LMO7_PAPAN	PCMV/PRV vs 3-month protocol	-0.912803	0.116667	0.212888	Not Significant
CALML3_PAPAN	PCMV/PRV vs 3-month protocol	-0.917235	0.0166667	0.057727	Not Significant
IL6ST_PAPAN	PCMV/PRV vs 3-month protocol	-0.919593	0.0666667	0.142029	Not Significant
KRT40_PAPAN	PCMV/PRV vs 3-month protocol	-0.921142	0.0666667	0.142029	Not Significant
KRT9_PAPAN	PCMV/PRV vs 3-month protocol	-0.921492	0.516667	0.621941	Not Significant
BCAM_PAPAN	PCMV/PRV vs 3-month protocol	-0.923291	0.116667	0.212888	Not Significant
PRG4_PIG	PCMV/PRV vs 3-month protocol	-0.923717	0.183333	0.290889	Not Significant
C1QA_PAPAN	PCMV/PRV vs 3-month protocol	-0.924585	0.0666667	0.142029	Not Significant
PACSIN2_PAPAN	PCMV/PRV vs 3-month protocol	-0.929748	0.116667	0.212888	Not Significant
APOC4_PAPAN	PCMV/PRV vs 3-month protocol	-0.933155	0.183333	0.290889	Not Significant
CBR4_PAPAN	PCMV/PRV vs 3-month protocol	-0.936709	0.183333	0.290889	Not Significant
HMCN1_PAPAN	PCMV/PRV vs 3-month protocol	-0.940386	0.0166667	0.057727	Not Significant
ADH6_PAPAN	PCMV/PRV vs 3-month protocol	-0.94452	0.666667	0.75045	Not Significant
TNFRSF1B_PAPAN	PCMV/PRV vs 3-month protocol	-0.945436	0.183333	0.290889	Not Significant
CCT8_PAPAN	PCMV/PRV vs 3-month protocol	-0.947352	0.0333333	0.0862319	Not Significant
TMED9_PIG	PCMV/PRV vs 3-month protocol	-0.950049	0.116667	0.212888	Not Significant
BCAP31_PAPAN	PCMV/PRV vs 3-month protocol	-0.952812	0.183333	0.290889	Not Significant
LANCL1_PAPAN	PCMV/PRV vs 3-month protocol	-0.953208	0.116667	0.212888	Not Significant
CYP17A1_PAPAN	PCMV/PRV vs 3-month protocol	-0.954327	0.116667	0.212888	Not Significant
ITGA11_PAPAN	PCMV/PRV vs 3-month protocol	-0.956033	0.116667	0.212888	Not Significant
ADIPOQ_PAPAN	PCMV/PRV vs 3-month protocol	-0.962717	0.116667	0.212888	Not Significant
CPT2_PAPAN	PCMV/PRV vs 3-month protocol	-0.963995	0.0333333	0.0862319	Not Significant
NEB_PAPAN	PCMV/PRV vs 3-month protocol	-0.964562	0.183333	0.290889	Not Significant
ADD2_PAPAN	PCMV/PRV vs 3-month protocol	-0.966019	0.0666667	0.142029	Not Significant
CCAR2_PAPAN	PCMV/PRV vs 3-month protocol	-0.966377	0.0333333	0.0862319	Not Significant
DPP4_PAPAN	PCMV/PRV vs 3-month protocol	-0.966463	0.116667	0.212888	Not Significant
GALK1_PAPAN	PCMV/PRV vs 3-month protocol	-0.968116	0.183333	0.290889	Not Significant
HSPG2_PAPAN	PCMV/PRV vs 3-month protocol	-0.972822	0.0166667	0.057727	Not Significant
MYH14_PIG	PCMV/PRV vs 3-month protocol	-0.973274	0.0333333	0.0862319	Not Significant
F9_PIG	PCMV/PRV vs 3-month protocol	-0.975496	0.116667	0.212888	Not Significant
PLXNA1_PAPAN	PCMV/PRV vs 3-month protocol	-0.976656	0.116667	0.212888	Not Significant
RECK_PAPAN	PCMV/PRV vs 3-month protocol	-0.977222	0.0166667	0.057727	Not Significant
LTBP2_PAPAN	PCMV/PRV vs 3-month protocol	-0.978437	0.0666667	0.142029	Not Significant
TFR2_PAPAN	PCMV/PRV vs 3-month protocol	-0.978544	0.116667	0.212888	Not Significant
MAN2B1_PAPAN	PCMV/PRV vs 3-month protocol	-0.98092	0.0666667	0.142029	Not Significant
LAMB2_PAPAN	PCMV/PRV vs 3-month protocol	-0.982499	0.116667	0.212888	Not Significant
UMPS_PAPAN	PCMV/PRV vs 3-month protocol	-0.982595	0.0666667	0.142029	Not Significant
MTTP_PAPAN	PCMV/PRV vs 3-month protocol	-0.983668	0.383333	0.502465	Not Significant
SERPINA3-2_PIG	PCMV/PRV vs 3-month protocol	-0.984587	0.183333	0.290889	Not Significant
TEX264_PAPAN	PCMV/PRV vs 3-month protocol	-0.986992	0.0666667	0.142029	Not Significant
TTC39B_PIG	PCMV/PRV vs 3-month protocol	-0.988603	0.383333	0.502465	Not Significant
CAMP_PAPAN	PCMV/PRV vs 3-month protocol	-0.994575	0.266667	0.385314	Not Significant
IL1R2_PAPAN	PCMV/PRV vs 3-month protocol	-0.997035	0.116667	0.212888	Not Significant
GP9_PAPAN	PCMV/PRV vs 3-month protocol	-0.997475	0.183333	0.290889	Not Significant
PI16_PAPAN	PCMV/PRV vs 3-month protocol	-0.99794	0.0333333	0.0862319	Not Significant
TUBB1_PAPAN	PCMV/PRV vs 3-month protocol	-0.998317	0.116667	0.212888	Not Significant
RNASE4_PAPAN	PCMV/PRV vs 3-month protocol	-1.00017	0.0333333	0.0862319	Not Significant
OASL_PAPAN	PCMV/PRV vs 3-month protocol	-1.00078	0.0666667	0.142029	Not Significant
TNXB_PIG	PCMV/PRV vs 3-month protocol	-1.00113	0.0333333	0.0862319	Not Significant
TFRC_PAPAN	PCMV/PRV vs 3-month protocol	-1.00229	0.183333	0.290889	Not Significant
SEPTIN9_PAPAN	PCMV/PRV vs 3-month protocol	-1.00261	0.116667	0.212888	Not Significant
WDR44_PAPAN	PCMV/PRV vs 3-month protocol	-1.00444	0.0333333	0.0862319	Not Significant
ACE2_PAPAN	PCMV/PRV vs 3-month protocol	-1.00588	0.0666667	0.142029	Not Significant
RRM1_PAPAN	PCMV/PRV vs 3-month protocol	-1.00654	0.266667	0.385314	Not Significant
OMD_PAPAN	PCMV/PRV vs 3-month protocol	-1.0099	0.0166667	0.057727	Not Significant
ROBO4_PAPAN	PCMV/PRV vs 3-month protocol	-1.01026	0.0333333	0.0862319	Not Significant
TGFBR3_PAPAN	PCMV/PRV vs 3-month protocol	-1.01309	0.183333	0.290889	Not Significant
ENPP1_PAPAN	PCMV/PRV vs 3-month protocol	-1.01336	0.0166667	0.057727	Not Significant
P4HA1_PAPAN	PCMV/PRV vs 3-month protocol	-1.01597	0.0166667	0.057727	Not Significant
QSOX1_PAPAN	PCMV/PRV vs 3-month protocol	-1.0186	0.0166667	0.057727	Not Significant
TMEM43_PAPAN	PCMV/PRV vs 3-month protocol	-1.02	0.0166667	0.057727	Not Significant
PDGFRB_PAPAN	PCMV/PRV vs 3-month protocol	-1.02972	0.116667	0.212888	Not Significant
RPL32_PIG	PCMV/PRV vs 3-month protocol	-1.03073	0.0666667	0.142029	Not Significant
H2BC4_PIG	PCMV/PRV vs 3-month protocol	-1.03237	0.116667	0.212888	Not Significant
CTNND1_PAPAN	PCMV/PRV vs 3-month protocol	-1.03612	0.0666667	0.142029	Not Significant
MCF2L_PAPAN	PCMV/PRV vs 3-month protocol	-1.04139	0.383333	0.502465	Not Significant
ABHD16A_PIG	PCMV/PRV vs 3-month protocol	-1.0422	0.0666667	0.142029	Not Significant
PGLYRP1_PAPAN	PCMV/PRV vs 3-month protocol	-1.04317	0.0166667	0.057727	Not Significant
ATL3_PAPAN	PCMV/PRV vs 3-month protocol	-1.04321	0.0166667	0.057727	Not Significant
CUL2_PAPAN	PCMV/PRV vs 3-month protocol	-1.0435	0.0166667	0.057727	Not Significant
NQO2_PAPAN	PCMV/PRV vs 3-month protocol	-1.04752	0.0166667	0.057727	Not Significant
MMP19_PAPAN	PCMV/PRV vs 3-month protocol	-1.05262	0.0666667	0.142029	Not Significant
RANGAP1_PAPAN	PCMV/PRV vs 3-month protocol	-1.05386	0.383333	0.502465	Not Significant
ASPH_PAPAN	PCMV/PRV vs 3-month protocol	-1.05575	0.0166667	0.057727	Not Significant
DDOST_PAPAN	PCMV/PRV vs 3-month protocol	-1.05876	0.116667	0.212888	Not Significant
EIF2AK2_PAPAN	PCMV/PRV vs 3-month protocol	-1.05943	0.116667	0.212888	Not Significant
C1QB_PAPAN	PCMV/PRV vs 3-month protocol	-1.05963	0.116667	0.212888	Not Significant
GYS1_PIG	PCMV/PRV vs 3-month protocol	-1.06501	0.0666667	0.142029	Not Significant
GOT2_PIG	PCMV/PRV vs 3-month protocol	-1.06536	0.0333333	0.0862319	Not Significant
CSAD_PAPAN	PCMV/PRV vs 3-month protocol	-1.06659	0.0166667	0.057727	Not Significant
RPS17_PIG	PCMV/PRV vs 3-month protocol	-1.06928	0.0666667	0.142029	Not Significant
FGB_PAPAN	PCMV/PRV vs 3-month protocol	-1.06945	0.0666667	0.142029	Not Significant
KRT85_PIG	PCMV/PRV vs 3-month protocol	-1.07063	0.0166667	0.057727	Not Significant
SRSF1_PIG	PCMV/PRV vs 3-month protocol	-1.07189	0.0166667	0.057727	Not Significant
LGALS3_PAPAN	PCMV/PRV vs 3-month protocol	-1.07323	0.0333333	0.0862319	Not Significant
MVK_PAPAN	PCMV/PRV vs 3-month protocol	-1.07396	0.0166667	0.057727	Not Significant
PRDX5_PAPAN	PCMV/PRV vs 3-month protocol	-1.07741	0.0166667	0.057727	Not Significant
MMRN2_PAPAN	PCMV/PRV vs 3-month protocol	-1.08182	0.183333	0.290889	Not Significant
HADH_PAPAN	PCMV/PRV vs 3-month protocol	-1.08221	0.0166667	0.057727	Not Significant
CLU_PAPAN	PCMV/PRV vs 3-month protocol	-1.08434	0.0166667	0.057727	Not Significant
C6_PAPAN	PCMV/PRV vs 3-month protocol	-1.08477	0.0166667	0.057727	Not Significant
PFAS_PAPAN	PCMV/PRV vs 3-month protocol	-1.08563	0.0166667	0.057727	Not Significant
CYP2D6_PAPAN	PCMV/PRV vs 3-month protocol	-1.08676	0.0333333	0.0862319	Not Significant
ETFA_PAPAN	PCMV/PRV vs 3-month protocol	-1.08774	0.0166667	0.057727	Not Significant
APOB_PAPAN	PCMV/PRV vs 3-month protocol	-1.09022	0.0666667	0.142029	Not Significant
MYH9_PIG	PCMV/PRV vs 3-month protocol	-1.09253	0.0166667	0.057727	Not Significant
SRGN_PAPAN	PCMV/PRV vs 3-month protocol	-1.09306	0.183333	0.290889	Not Significant
PSMD6_PAPAN	PCMV/PRV vs 3-month protocol	-1.09314	0.116667	0.212888	Not Significant
RBM12_PAPAN	PCMV/PRV vs 3-month protocol	-1.09606	0.266667	0.385314	Not Significant
SVEP1_PIG	PCMV/PRV vs 3-month protocol	-1.10227	0.116667	0.212888	Not Significant
SHMT2_PAPAN	PCMV/PRV vs 3-month protocol	-1.10448	0.0166667	0.057727	Not Significant
SERPINB12_PAPAN	PCMV/PRV vs 3-month protocol	-1.1047	0.116667	0.212888	Not Significant
VNN2_PAPAN	PCMV/PRV vs 3-month protocol	-1.10661	0.0333333	0.0862319	Not Significant
DBNL_PAPAN	PCMV/PRV vs 3-month protocol	-1.10822	0.0166667	0.057727	Not Significant
KRT14_PAPAN	PCMV/PRV vs 3-month protocol	-1.1096	0.383333	0.502465	Not Significant
FST_PAPAN	PCMV/PRV vs 3-month protocol	-1.11195	0.116667	0.212888	Not Significant
TBC1D15_PAPAN	PCMV/PRV vs 3-month protocol	-1.11663	0.0333333	0.0862319	Not Significant
ZG16_PAPAN	PCMV/PRV vs 3-month protocol	-1.11857	0.0166667	0.057727	Not Significant
MYBPC1_PAPAN	PCMV/PRV vs 3-month protocol	-1.12	0.833333	0.883726	Not Significant
IL1RAP_PAPAN	PCMV/PRV vs 3-month protocol	-1.12417	0.183333	0.290889	Not Significant
HPSE_PAPAN	PCMV/PRV vs 3-month protocol	-1.12692	0.0666667	0.142029	Not Significant
APOA2_PAPAN	PCMV/PRV vs 3-month protocol	-1.12733	0.0333333	0.0862319	Not Significant
NCSTN_PAPAN	PCMV/PRV vs 3-month protocol	-1.12776	0.0333333	0.0862319	Not Significant
SMOC2_PIG	PCMV/PRV vs 3-month protocol	-1.12828	0.116667	0.212888	Not Significant
HEG1_PAPAN	PCMV/PRV vs 3-month protocol	-1.13956	0.183333	0.290889	Not Significant
TAGLN2_PIG	PCMV/PRV vs 3-month protocol	-1.14084	0.0333333	0.0862319	Not Significant
HUWE1_PAPAN	PCMV/PRV vs 3-month protocol	-1.14333	0.0333333	0.0862319	Not Significant
MPI_PAPAN	PCMV/PRV vs 3-month protocol	-1.14342	0.0666667	0.142029	Not Significant
AMH_PAPAN	PCMV/PRV vs 3-month protocol	-1.14637	0.383333	0.502465	Not Significant
NDUFV1_PIG	PCMV/PRV vs 3-month protocol	-1.15062	0.116667	0.212888	Not Significant
GGT5_PAPAN	PCMV/PRV vs 3-month protocol	-1.15155	0.0666667	0.142029	Not Significant
FDFT1_PAPAN	PCMV/PRV vs 3-month protocol	-1.15267	0.0666667	0.142029	Not Significant
KRT80_PAPAN	PCMV/PRV vs 3-month protocol	-1.15413	0.116667	0.212888	Not Significant
ALDH3A1_PAPAN	PCMV/PRV vs 3-month protocol	-1.15573	0.116667	0.212888	Not Significant
IMPA2_PAPAN	PCMV/PRV vs 3-month protocol	-1.15699	0.0333333	0.0862319	Not Significant
SKAP2_PAPAN	PCMV/PRV vs 3-month protocol	-1.16238	0.0333333	0.0862319	Not Significant
NPTN_PAPAN	PCMV/PRV vs 3-month protocol	-1.16751	0.833333	0.883726	Not Significant
FAM120A_PAPAN	PCMV/PRV vs 3-month protocol	-1.1689	0.0666667	0.142029	Not Significant
ITGA2_PAPAN	PCMV/PRV vs 3-month protocol	-1.16986	0.0333333	0.0862319	Not Significant
ERAP2_PAPAN	PCMV/PRV vs 3-month protocol	-1.1705	0.0666667	0.142029	Not Significant
TTLL12_PAPAN	PCMV/PRV vs 3-month protocol	-1.17274	0.516667	0.621941	Not Significant
YARS1_PAPAN	PCMV/PRV vs 3-month protocol	-1.17289	0.0666667	0.142029	Not Significant
MRI1_PAPAN	PCMV/PRV vs 3-month protocol	-1.17372	0.0166667	0.057727	Not Significant
LONP1_PAPAN	PCMV/PRV vs 3-month protocol	-1.17941	0.0166667	0.057727	Not Significant
CRAT_PAPAN	PCMV/PRV vs 3-month protocol	-1.18287	0.0166667	0.057727	Not Significant
D2HGDH_PAPAN	PCMV/PRV vs 3-month protocol	-1.18622	0.0166667	0.057727	Not Significant
HYAL3_PAPAN	PCMV/PRV vs 3-month protocol	-1.18744	0.0333333	0.0862319	Not Significant
IGFBP3_PAPAN	PCMV/PRV vs 3-month protocol	-1.18989	0.0333333	0.0862319	Not Significant
TRO_PAPAN	PCMV/PRV vs 3-month protocol	-1.19368	0.0333333	0.0862319	Not Significant
CMBL_PAPAN	PCMV/PRV vs 3-month protocol	-1.19978	0.0166667	0.057727	Not Significant
TSPAN32_PAPAN	PCMV/PRV vs 3-month protocol	-1.20069	0.116667	0.212888	Not Significant
CSRP1_PAPAN	PCMV/PRV vs 3-month protocol	-1.20095	0.0666667	0.142029	Not Significant
F11_PAPAN	PCMV/PRV vs 3-month protocol	-1.20117	0.0333333	0.0862319	Not Significant
ICAM1_PAPAN	PCMV/PRV vs 3-month protocol	-1.20151	0.0166667	0.057727	Not Significant
HELZ2_PAPAN	PCMV/PRV vs 3-month protocol	-1.20204	0.0166667	0.057727	Not Significant
FGA_PIG	PCMV/PRV vs 3-month protocol	-1.20326	0.0166667	0.057727	Not Significant
FCGR1A_PAPAN	PCMV/PRV vs 3-month protocol	-1.20684	0.183333	0.290889	Not Significant
PREP_PAPAN	PCMV/PRV vs 3-month protocol	-1.20739	0.0333333	0.0862319	Not Significant
FGG_PIG	PCMV/PRV vs 3-month protocol	-1.20869	0.0333333	0.0862319	Not Significant
FN1_PAPAN	PCMV/PRV vs 3-month protocol	-1.20927	0.0166667	0.057727	Not Significant
HAPLN3_PAPAN	PCMV/PRV vs 3-month protocol	-1.21141	0.116667	0.212888	Not Significant
SPON1_PAPAN	PCMV/PRV vs 3-month protocol	-1.21703	0.0166667	0.057727	Not Significant
ARHGAP4_PAPAN	PCMV/PRV vs 3-month protocol	-1.21781	0.0166667	0.057727	Not Significant
KRT79_PAPAN	PCMV/PRV vs 3-month protocol	-1.21843	0.0166667	0.057727	Not Significant
MST1_PAPAN	PCMV/PRV vs 3-month protocol	-1.22204	0.0333333	0.0862319	Not Significant
C4A_PIG	PCMV/PRV vs 3-month protocol	-1.22359	0.0333333	0.0862319	Not Significant
MMP9_PAPAN	PCMV/PRV vs 3-month protocol	-1.2258	0.0333333	0.0862319	Not Significant
BAIAP2_PAPAN	PCMV/PRV vs 3-month protocol	-1.22869	0.0166667	0.057727	Not Significant
VASN_PAPAN	PCMV/PRV vs 3-month protocol	-1.2347	0.0666667	0.142029	Not Significant
CGN_PAPAN	PCMV/PRV vs 3-month protocol	-1.23519	0.0666667	0.142029	Not Significant
CDC42BPB_PAPAN	PCMV/PRV vs 3-month protocol	-1.23674	0.0166667	0.057727	Not Significant
EFEMP1_PAPAN	PCMV/PRV vs 3-month protocol	-1.24265	0.0166667	0.057727	Not Significant
PLOD1_PAPAN	PCMV/PRV vs 3-month protocol	-1.24503	0.0166667	0.057727	Not Significant
CFI_PAPAN	PCMV/PRV vs 3-month protocol	-1.24511	0.0166667	0.057727	Not Significant
GLYAT_PAPAN	PCMV/PRV vs 3-month protocol	-1.24631	0.183333	0.290889	Not Significant
CRISP2_PAPAN	PCMV/PRV vs 3-month protocol	-1.24647	0.0666667	0.142029	Not Significant
C1QC_PAPAN	PCMV/PRV vs 3-month protocol	-1.25237	0.0666667	0.142029	Not Significant
SYK_PAPAN	PCMV/PRV vs 3-month protocol	-1.25669	0.0166667	0.057727	Not Significant
AUH_PAPAN	PCMV/PRV vs 3-month protocol	-1.25701	0.116667	0.212888	Not Significant
QPRT_PAPAN	PCMV/PRV vs 3-month protocol	-1.25803	0.0333333	0.0862319	Not Significant
DNAJA1_PIG	PCMV/PRV vs 3-month protocol	-1.25835	0.0166667	0.057727	Not Significant
OAT_PAPAN	PCMV/PRV vs 3-month protocol	-1.26159	0.0666667	0.142029	Not Significant
TMEM132C_PAPAN	PCMV/PRV vs 3-month protocol	-1.2622	0.0666667	0.142029	Not Significant
FGG_PAPAN	PCMV/PRV vs 3-month protocol	-1.26473	0.0166667	0.057727	Not Significant
CD14_PAPAN	PCMV/PRV vs 3-month protocol	-1.27199	0.0166667	0.057727	Not Significant
KRT5_PAPAN	PCMV/PRV vs 3-month protocol	-1.27291	0.183333	0.290889	Not Significant
GCKR_PAPAN	PCMV/PRV vs 3-month protocol	-1.27304	0.116667	0.212888	Not Significant
MYL3_PAPAN	PCMV/PRV vs 3-month protocol	-1.27327	0.116667	0.212888	Not Significant
F5_PAPAN	PCMV/PRV vs 3-month protocol	-1.27369	0.116667	0.212888	Not Significant
CD93_PAPAN	PCMV/PRV vs 3-month protocol	-1.27515	0.0333333	0.0862319	Not Significant
MYO1C_PAPAN	PCMV/PRV vs 3-month protocol	-1.27594	0.0166667	0.057727	Not Significant
MCCC2_PAPAN	PCMV/PRV vs 3-month protocol	-1.27657	0.0166667	0.057727	Not Significant
PDHA1_PIG	PCMV/PRV vs 3-month protocol	-1.27987	0.0666667	0.142029	Not Significant
IGLV3-27_PAPAN	PCMV/PRV vs 3-month protocol	-1.28346	0.183333	0.290889	Not Significant
KRT2_PAPAN	PCMV/PRV vs 3-month protocol	-1.28606	0.383333	0.502465	Not Significant
ABHD10_PAPAN	PCMV/PRV vs 3-month protocol	-1.29457	0.0666667	0.142029	Not Significant
STARD5_PAPAN	PCMV/PRV vs 3-month protocol	-1.29572	0.116667	0.212888	Not Significant
SRPK1_PIG	PCMV/PRV vs 3-month protocol	-1.29675	0.0666667	0.142029	Not Significant
ETFDH_PAPAN	PCMV/PRV vs 3-month protocol	-1.2978	0.0166667	0.057727	Not Significant
COLEC11_PAPAN	PCMV/PRV vs 3-month protocol	-1.29874	0.0333333	0.0862319	Not Significant
FGB_PIG	PCMV/PRV vs 3-month protocol	-1.30087	0.0333333	0.0862319	Not Significant
SDF4_PAPAN	PCMV/PRV vs 3-month protocol	-1.30223	0.0333333	0.0862319	Not Significant
CTSZ_PAPAN	PCMV/PRV vs 3-month protocol	-1.30242	0.116667	0.212888	Not Significant
DRG1_PIG	PCMV/PRV vs 3-month protocol	-1.30663	0.0333333	0.0862319	Not Significant
AHSA1_PAPAN	PCMV/PRV vs 3-month protocol	-1.30672	0.0166667	0.057727	Not Significant
ESYT3_PAPAN	PCMV/PRV vs 3-month protocol	-1.31203	0.0666667	0.142029	Not Significant
HIP1R_PAPAN	PCMV/PRV vs 3-month protocol	-1.31297	0.0333333	0.0862319	Not Significant
RIPOR3_PAPAN	PCMV/PRV vs 3-month protocol	-1.31794	0.0333333	0.0862319	Not Significant
ITIH3_PAPAN	PCMV/PRV vs 3-month protocol	-1.32241	0.266667	0.385314	Not Significant
HAGH_PAPAN	PCMV/PRV vs 3-month protocol	-1.32389	0.0166667	0.057727	Not Significant
COLGALT1_PAPAN	PCMV/PRV vs 3-month protocol	-1.32593	0.0666667	0.142029	Not Significant
STX11_PAPAN	PCMV/PRV vs 3-month protocol	-1.32765	0.0166667	0.057727	Not Significant
EVI2B_PAPAN	PCMV/PRV vs 3-month protocol	-1.33194	0.116667	0.212888	Not Significant
SELP_PAPAN	PCMV/PRV vs 3-month protocol	-1.3398	0.0666667	0.142029	Not Significant
IGF2R_PAPAN	PCMV/PRV vs 3-month protocol	-1.34225	0.0333333	0.0862319	Not Significant
IGDCC4_PAPAN	PCMV/PRV vs 3-month protocol	-1.3433	0.0166667	0.057727	Not Significant
RPN1_PAPAN	PCMV/PRV vs 3-month protocol	-1.34683	0.0166667	0.057727	Not Significant
JCHAIN_PAPAN	PCMV/PRV vs 3-month protocol	-1.34689	0.116667	0.212888	Not Significant
ANGPTL6_PAPAN	PCMV/PRV vs 3-month protocol	-1.34737	0.116667	0.212888	Not Significant
UPB1_PAPAN	PCMV/PRV vs 3-month protocol	-1.35506	0.0166667	0.057727	Not Significant
SPTBN2_PAPAN	PCMV/PRV vs 3-month protocol	-1.35575	0.116667	0.212888	Not Significant
DAZAP1_PIG	PCMV/PRV vs 3-month protocol	-1.35698	0.0666667	0.142029	Not Significant
AKAP12_PAPAN	PCMV/PRV vs 3-month protocol	-1.35824	0.0333333	0.0862319	Not Significant
MYO9B_PAPAN	PCMV/PRV vs 3-month protocol	-1.36335	0.0166667	0.057727	Not Significant
GSN_PAPAN	PCMV/PRV vs 3-month protocol	-1.36351	0.0166667	0.057727	Not Significant
POF1B_PAPAN	PCMV/PRV vs 3-month protocol	-1.3646	0.0666667	0.142029	Not Significant
ANTXR2_PAPAN	PCMV/PRV vs 3-month protocol	-1.36563	0.0166667	0.057727	Not Significant
ENDOD1_PAPAN	PCMV/PRV vs 3-month protocol	-1.36618	0.0333333	0.0862319	Not Significant
KRT1_PAPAN	PCMV/PRV vs 3-month protocol	-1.36718	0.0666667	0.142029	Not Significant
PRXL2A_PAPAN	PCMV/PRV vs 3-month protocol	-1.3696	0.0166667	0.057727	Not Significant
KRT18_PIG	PCMV/PRV vs 3-month protocol	-1.36988	0.266667	0.385314	Not Significant
C7_PAPAN	PCMV/PRV vs 3-month protocol	-1.37189	0.0166667	0.057727	Not Significant
LAMC2_PAPAN	PCMV/PRV vs 3-month protocol	-1.37235	0.0166667	0.057727	Not Significant
SFN_PIG	PCMV/PRV vs 3-month protocol	-1.37411	0.183333	0.290889	Not Significant
APOF_PAPAN	PCMV/PRV vs 3-month protocol	-1.37432	0.0166667	0.057727	Not Significant
CFI_PIG	PCMV/PRV vs 3-month protocol	-1.37583	0.0166667	0.057727	Not Significant
ITIH1_PIG	PCMV/PRV vs 3-month protocol	-1.37596	0.0166667	0.057727	Not Significant
SMOC1_PAPAN	PCMV/PRV vs 3-month protocol	-1.37625	0.116667	0.212888	Not Significant
NCLN_PAPAN	PCMV/PRV vs 3-month protocol	-1.37711	0.0166667	0.057727	Not Significant
DSC2_PAPAN	PCMV/PRV vs 3-month protocol	-1.37927	0.0166667	0.057727	Not Significant
PTPN1_PAPAN	PCMV/PRV vs 3-month protocol	-1.37957	0.0166667	0.057727	Not Significant
PGM5_PAPAN	PCMV/PRV vs 3-month protocol	-1.38078	0.0166667	0.057727	Not Significant
ALDH3B1_PAPAN	PCMV/PRV vs 3-month protocol	-1.38162	0.0166667	0.057727	Not Significant
PKN1_PAPAN	PCMV/PRV vs 3-month protocol	-1.3868	0.0166667	0.057727	Not Significant
IHH_PAPAN	PCMV/PRV vs 3-month protocol	-1.38837	0.0333333	0.0862319	Not Significant
SRP72_PAPAN	PCMV/PRV vs 3-month protocol	-1.39078	0.0166667	0.057727	Not Significant
FYB1_PAPAN	PCMV/PRV vs 3-month protocol	-1.39377	0.0333333	0.0862319	Not Significant
ACE_PAPAN	PCMV/PRV vs 3-month protocol	-1.39702	0.0666667	0.142029	Not Significant
DMP1_PAPAN	PCMV/PRV vs 3-month protocol	-1.3977	0.0333333	0.0862319	Not Significant
HSD17B8_PAPAN	PCMV/PRV vs 3-month protocol	-1.39994	0.0666667	0.142029	Not Significant
CLU_PIG	PCMV/PRV vs 3-month protocol	-1.39995	0.116667	0.212888	Not Significant
FHOD1_PAPAN	PCMV/PRV vs 3-month protocol	-1.40468	0.0666667	0.142029	Not Significant
SWAP70_PAPAN	PCMV/PRV vs 3-month protocol	-1.40483	0.0166667	0.057727	Not Significant
LIPE_PAPAN	PCMV/PRV vs 3-month protocol	-1.40565	0.116667	0.212888	Not Significant
HGS_PAPAN	PCMV/PRV vs 3-month protocol	-1.40586	0.0166667	0.057727	Not Significant
APOD_PAPAN	PCMV/PRV vs 3-month protocol	-1.40748	0.0666667	0.142029	Not Significant
C1RL_PAPAN	PCMV/PRV vs 3-month protocol	-1.40983	0.0333333	0.0862319	Not Significant
CPN1_PAPAN	PCMV/PRV vs 3-month protocol	-1.41089	0.0166667	0.057727	Not Significant
APOC1_PAPAN	PCMV/PRV vs 3-month protocol	-1.41156	0.116667	0.212888	Not Significant
CHIT1_PAPAN	PCMV/PRV vs 3-month protocol	-1.41436	0.0333333	0.0862319	Not Significant
IGFBP6_PAPAN	PCMV/PRV vs 3-month protocol	-1.41731	0.0666667	0.142029	Not Significant
TGFB1_PAPAN	PCMV/PRV vs 3-month protocol	-1.42067	0.0666667	0.142029	Not Significant
RALBP1_PAPAN	PCMV/PRV vs 3-month protocol	-1.42219	0.0166667	0.057727	Not Significant
PLG_PAPAN	PCMV/PRV vs 3-month protocol	-1.42522	0.0166667	0.057727	Not Significant
SELL_PIG	PCMV/PRV vs 3-month protocol	-1.42848	0.0166667	0.057727	Not Significant
GCA_PAPAN	PCMV/PRV vs 3-month protocol	-1.42869	0.183333	0.290889	Not Significant
ARHGAP18_PAPAN	PCMV/PRV vs 3-month protocol	-1.43008	0.0333333	0.0862319	Not Significant
HGF_PAPAN	PCMV/PRV vs 3-month protocol	-1.4322	0.0333333	0.0862319	Not Significant
MYO5B_PAPAN	PCMV/PRV vs 3-month protocol	-1.43292	0.116667	0.212888	Not Significant
NUP155_PAPAN	PCMV/PRV vs 3-month protocol	-1.43336	0.0166667	0.057727	Not Significant
AOC1_PAPAN	PCMV/PRV vs 3-month protocol	-1.43927	0.183333	0.290889	Not Significant
AHSG_PIG	PCMV/PRV vs 3-month protocol	-1.44401	0.0666667	0.142029	Not Significant
HMOX2_PAPAN	PCMV/PRV vs 3-month protocol	-1.4482	0.0166667	0.057727	Not Significant
MTCH2_PAPAN	PCMV/PRV vs 3-month protocol	-1.45041	0.183333	0.290889	Not Significant
CD8A_PAPAN	PCMV/PRV vs 3-month protocol	-1.45064	0.0166667	0.057727	Not Significant
CCT7_PAPAN	PCMV/PRV vs 3-month protocol	-1.45275	0.0166667	0.057727	Not Significant
HDLBP_PAPAN	PCMV/PRV vs 3-month protocol	-1.45652	0.0333333	0.0862319	Not Significant
CLSTN1_PAPAN	PCMV/PRV vs 3-month protocol	-1.46211	0.183333	0.290889	Not Significant
CILP2_PAPAN	PCMV/PRV vs 3-month protocol	-1.46224	0.0333333	0.0862319	Not Significant
SQLE_PAPAN	PCMV/PRV vs 3-month protocol	-1.46767	0.0166667	0.057727	Not Significant
SHBG_PAPAN	PCMV/PRV vs 3-month protocol	-1.46859	0.0333333	0.0862319	Not Significant
ACSL6_PAPAN	PCMV/PRV vs 3-month protocol	-1.46945	0.0166667	0.057727	Not Significant
KPRP_PAPAN	PCMV/PRV vs 3-month protocol	-1.47181	0.0333333	0.0862319	Not Significant
ITGA1_PAPAN	PCMV/PRV vs 3-month protocol	-1.47415	0.0333333	0.0862319	Not Significant
CFD_PIG	PCMV/PRV vs 3-month protocol	-1.47551	0.0333333	0.0862319	Not Significant
CCL21_PAPAN	PCMV/PRV vs 3-month protocol	-1.4761	0.116667	0.212888	Not Significant
CYB5R1_PAPAN	PCMV/PRV vs 3-month protocol	-1.47724	0.0166667	0.057727	Not Significant
FTCD_PAPAN	PCMV/PRV vs 3-month protocol	-1.48003	0.0333333	0.0862319	Not Significant
GEMIN5_PAPAN	PCMV/PRV vs 3-month protocol	-1.48037	0.266667	0.385314	Not Significant
CD4_PAPAN	PCMV/PRV vs 3-month protocol	-1.48261	0.0166667	0.057727	Not Significant
HP1BP3_PAPAN	PCMV/PRV vs 3-month protocol	-1.48627	0.0166667	0.057727	Not Significant
LUM_PAPAN	PCMV/PRV vs 3-month protocol	-1.48693	0.0166667	0.057727	Not Significant
PLIN1_PAPAN	PCMV/PRV vs 3-month protocol	-1.49018	0.183333	0.290889	Not Significant
VTN_PIG	PCMV/PRV vs 3-month protocol	-1.49063	0.0166667	0.057727	Not Significant
KRT23_PAPAN	PCMV/PRV vs 3-month protocol	-1.49092	0.0166667	0.057727	Not Significant
HMCN2_PAPAN	PCMV/PRV vs 3-month protocol	-1.49185	0.0333333	0.0862319	Not Significant
PITRM1_PAPAN	PCMV/PRV vs 3-month protocol	-1.49188	0.0333333	0.0862319	Not Significant
SCRN2_PAPAN	PCMV/PRV vs 3-month protocol	-1.49274	0.0166667	0.057727	Not Significant
RASA3_PAPAN	PCMV/PRV vs 3-month protocol	-1.49497	0.0333333	0.0862319	Not Significant
ANTXR1_PAPAN	PCMV/PRV vs 3-month protocol	-1.49811	0.0666667	0.142029	Not Significant
HM13_PAPAN	PCMV/PRV vs 3-month protocol	-1.49948	0.0166667	0.057727	Not Significant
KALRN_PAPAN	PCMV/PRV vs 3-month protocol	-1.50051	0.0666667	0.142029	Not Significant
PEX11B_PIG	PCMV/PRV vs 3-month protocol	-1.50358	0.0333333	0.0862319	Not Significant
FARSB_PAPAN	PCMV/PRV vs 3-month protocol	-1.50551	0.116667	0.212888	Not Significant
AGMAT_PAPAN	PCMV/PRV vs 3-month protocol	-1.50629	0.0166667	0.057727	Not Significant
PROCR_PAPAN	PCMV/PRV vs 3-month protocol	-1.51141	0.0166667	0.057727	Not Significant
DTD1_PIG	PCMV/PRV vs 3-month protocol	-1.51325	0.0166667	0.057727	Not Significant
SYTL4_PAPAN	PCMV/PRV vs 3-month protocol	-1.51476	0.0333333	0.0862319	Not Significant
COL5A1_PIG	PCMV/PRV vs 3-month protocol	-1.51756	0.0333333	0.0862319	Not Significant
AMBP_PAPAN	PCMV/PRV vs 3-month protocol	-1.52275	0.0333333	0.0862319	Not Significant
ROCK2_PAPAN	PCMV/PRV vs 3-month protocol	-1.52795	0.0333333	0.0862319	Not Significant
IGHM_PAPAN	PCMV/PRV vs 3-month protocol	-1.52823	0.0166667	0.057727	Not Significant
CD5L_PAPAN	PCMV/PRV vs 3-month protocol	-1.53346	0.0166667	0.057727	Not Significant
MTDH_PAPAN	PCMV/PRV vs 3-month protocol	-1.54105	0.183333	0.290889	Not Significant
DPYSL3_PAPAN	PCMV/PRV vs 3-month protocol	-1.54135	0.0166667	0.057727	Not Significant
ECM1_PAPAN	PCMV/PRV vs 3-month protocol	-1.54499	0.0166667	0.057727	Not Significant
APOBR_PAPAN	PCMV/PRV vs 3-month protocol	-1.5483	0.0333333	0.0862319	Not Significant
BTD_PAPAN	PCMV/PRV vs 3-month protocol	-1.54831	0.0166667	0.057727	Not Significant
CTSA_PAPAN	PCMV/PRV vs 3-month protocol	-1.54902	0.0166667	0.057727	Not Significant
SLPI_PAPAN	PCMV/PRV vs 3-month protocol	-1.55232	0.116667	0.212888	Not Significant
GP5_PAPAN	PCMV/PRV vs 3-month protocol	-1.55298	0.0166667	0.057727	Not Significant
SERPINA6_PAPAN	PCMV/PRV vs 3-month protocol	-1.5531	0.0333333	0.0862319	Not Significant
EFEMP1_PIG	PCMV/PRV vs 3-month protocol	-1.55617	0.0666667	0.142029	Not Significant
SMPD1_PAPAN	PCMV/PRV vs 3-month protocol	-1.55704	0.0166667	0.057727	Not Significant
PLG_PIG	PCMV/PRV vs 3-month protocol	-1.5596	0.0166667	0.057727	Not Significant
CASS4_PAPAN	PCMV/PRV vs 3-month protocol	-1.57146	0.0333333	0.0862319	Not Significant
TAP2_PAPAN	PCMV/PRV vs 3-month protocol	-1.57241	0.0333333	0.0862319	Not Significant
PTBP1_PIG	PCMV/PRV vs 3-month protocol	-1.5735	0.116667	0.212888	Not Significant
VTN_PAPAN	PCMV/PRV vs 3-month protocol	-1.57378	0.0333333	0.0862319	Not Significant
MYO1D_PAPAN	PCMV/PRV vs 3-month protocol	-1.57495	0.0166667	0.057727	Not Significant
SPRR4_PAPAN	PCMV/PRV vs 3-month protocol	-1.58142	0.0166667	0.057727	Not Significant
NCAM1_PAPAN	PCMV/PRV vs 3-month protocol	-1.58241	0.0333333	0.0862319	Not Significant
CLEC1B_PAPAN	PCMV/PRV vs 3-month protocol	-1.58634	0.0666667	0.142029	Not Significant
SOD3_PAPAN	PCMV/PRV vs 3-month protocol	-1.5898	0.0166667	0.057727	Not Significant
CSTA_PAPAN	PCMV/PRV vs 3-month protocol	-1.59295	0.0666667	0.142029	Not Significant
MGLL_PAPAN	PCMV/PRV vs 3-month protocol	-1.59562	0.0333333	0.0862319	Not Significant
COPZ1_PIG	PCMV/PRV vs 3-month protocol	-1.60082	0.0333333	0.0862319	Not Significant
AGT_PAPAN	PCMV/PRV vs 3-month protocol	-1.60592	0.0166667	0.057727	Not Significant
RAB1B_PIG	PCMV/PRV vs 3-month protocol	-1.60728	0.0166667	0.057727	Not Significant
CYP8B1_PAPAN	PCMV/PRV vs 3-month protocol	-1.60765	0.0333333	0.0862319	Not Significant
AGXT2_PAPAN	PCMV/PRV vs 3-month protocol	-1.60822	0.116667	0.212888	Not Significant
HBB_PIG	PCMV/PRV vs 3-month protocol	-1.60914	0.116667	0.212888	Not Significant
PTPN23_PAPAN	PCMV/PRV vs 3-month protocol	-1.60945	0.0166667	0.057727	Not Significant
GLRX3_PAPAN	PCMV/PRV vs 3-month protocol	-1.61089	0.0166667	0.057727	Not Significant
APEH_PAPAN	PCMV/PRV vs 3-month protocol	-1.61121	0.0166667	0.057727	Not Significant
ITIH4_PIG	PCMV/PRV vs 3-month protocol	-1.61235	0.0166667	0.057727	Not Significant
CDSN_PAPAN	PCMV/PRV vs 3-month protocol	-1.61506	0.0666667	0.142029	Not Significant
IGKV4-1_PAPAN	PCMV/PRV vs 3-month protocol	-1.61643	0.0666667	0.142029	Not Significant
CDK5RAP3_PAPAN	PCMV/PRV vs 3-month protocol	-1.6223	0.0166667	0.057727	Not Significant
ALDH7A1_PAPAN	PCMV/PRV vs 3-month protocol	-1.62498	0.0666667	0.142029	Not Significant
CFH_PAPAN	PCMV/PRV vs 3-month protocol	-1.62647	0.0166667	0.057727	Not Significant
LSR_PAPAN	PCMV/PRV vs 3-month protocol	-1.63232	0.0666667	0.142029	Not Significant
GNA15_PAPAN	PCMV/PRV vs 3-month protocol	-1.63285	0.0333333	0.0862319	Not Significant
IDUA_PAPAN	PCMV/PRV vs 3-month protocol	-1.6354	0.0166667	0.057727	Not Significant
ALOX12B_PAPAN	PCMV/PRV vs 3-month protocol	-1.6358	0.0166667	0.057727	Not Significant
KRT10_PAPAN	PCMV/PRV vs 3-month protocol	-1.64249	0.0666667	0.142029	Not Significant
CEMIP_PAPAN	PCMV/PRV vs 3-month protocol	-1.64656	0.0166667	0.057727	Not Significant
NDUFS7_PIG	PCMV/PRV vs 3-month protocol	-1.64708	0.0166667	0.057727	Not Significant
APMAP_PAPAN	PCMV/PRV vs 3-month protocol	-1.64986	0.0166667	0.057727	Not Significant
MASP1_PAPAN	PCMV/PRV vs 3-month protocol	-1.65281	0.0166667	0.057727	Not Significant
PLEK_PAPAN	PCMV/PRV vs 3-month protocol	-1.65314	0.0666667	0.142029	Not Significant
LRG1_PAPAN	PCMV/PRV vs 3-month protocol	-1.65873	0.183333	0.290889	Not Significant
NAGLU_PAPAN	PCMV/PRV vs 3-month protocol	-1.66061	0.0166667	0.057727	Not Significant
AGT_PIG	PCMV/PRV vs 3-month protocol	-1.66302	0.0666667	0.142029	Not Significant
SERPINA10_PAPAN	PCMV/PRV vs 3-month protocol	-1.66518	0.0166667	0.057727	Not Significant
BST2_PAPAN	PCMV/PRV vs 3-month protocol	-1.66635	0.0333333	0.0862319	Not Significant
CKAP5_PAPAN	PCMV/PRV vs 3-month protocol	-1.667	0.0166667	0.057727	Not Significant
IDI1_PAPAN	PCMV/PRV vs 3-month protocol	-1.66736	0.0166667	0.057727	Not Significant
F8_PAPAN	PCMV/PRV vs 3-month protocol	-1.66795	0.0166667	0.057727	Not Significant
EGFLAM_PAPAN	PCMV/PRV vs 3-month protocol	-1.6691	0.0166667	0.057727	Not Significant
APOH_PAPAN	PCMV/PRV vs 3-month protocol	-1.66989	0.0333333	0.0862319	Not Significant
NUP93_PAPAN	PCMV/PRV vs 3-month protocol	-1.67042	0.0166667	0.057727	Not Significant
HK2_PAPAN	PCMV/PRV vs 3-month protocol	-1.67377	0.0166667	0.057727	Not Significant
PTK7_PAPAN	PCMV/PRV vs 3-month protocol	-1.67438	0.0166667	0.057727	Not Significant
CLYBL_PAPAN	PCMV/PRV vs 3-month protocol	-1.67899	0.0333333	0.0862319	Not Significant
FARSA_PAPAN	PCMV/PRV vs 3-month protocol	-1.6841	0.0166667	0.057727	Not Significant
SERPINA7_PAPAN	PCMV/PRV vs 3-month protocol	-1.68749	0.0166667	0.057727	Not Significant
PDLIM1_PAPAN	PCMV/PRV vs 3-month protocol	-1.68943	0.0333333	0.0862319	Not Significant
KLK5_PAPAN	PCMV/PRV vs 3-month protocol	-1.68965	0.0166667	0.057727	Not Significant
C9_PAPAN	PCMV/PRV vs 3-month protocol	-1.69631	0.0166667	0.057727	Not Significant
C5_PAPAN	PCMV/PRV vs 3-month protocol	-1.69722	0.0166667	0.057727	Not Significant
HYAL2_PAPAN	PCMV/PRV vs 3-month protocol	-1.70119	0.0166667	0.057727	Not Significant
EXOC4_PAPAN	PCMV/PRV vs 3-month protocol	-1.70805	0.0166667	0.057727	Not Significant
MAN2B2_PAPAN	PCMV/PRV vs 3-month protocol	-1.70965	0.0333333	0.0862319	Not Significant
DUOX1_PAPAN	PCMV/PRV vs 3-month protocol	-1.7121	0.0166667	0.057727	Not Significant
FAM83G_PAPAN	PCMV/PRV vs 3-month protocol	-1.71363	0.0333333	0.0862319	Not Significant
EXTL2_PAPAN	PCMV/PRV vs 3-month protocol	-1.71915	0.0333333	0.0862319	Not Significant
CMPK2_PAPAN	PCMV/PRV vs 3-month protocol	-1.71975	0.0166667	0.057727	Not Significant
CRTAC1_PAPAN	PCMV/PRV vs 3-month protocol	-1.72811	0.0166667	0.057727	Not Significant
IGHE_PAPAN	PCMV/PRV vs 3-month protocol	-1.72942	0.383333	0.502465	Not Significant
APOC2_PAPAN	PCMV/PRV vs 3-month protocol	-1.73076	0.0166667	0.057727	Not Significant
ATP1B1_PAPAN	PCMV/PRV vs 3-month protocol	-1.73266	0.0333333	0.0862319	Not Significant
VWF_PIG	PCMV/PRV vs 3-month protocol	-1.73695	0.0333333	0.0862319	Not Significant
FCGBP_PIG	PCMV/PRV vs 3-month protocol	-1.73755	0.0666667	0.142029	Not Significant
ACTN3_PAPAN	PCMV/PRV vs 3-month protocol	-1.74001	0.383333	0.502465	Not Significant
C8G_PAPAN	PCMV/PRV vs 3-month protocol	-1.74008	0.0166667	0.057727	Not Significant
A1BG_PIG	PCMV/PRV vs 3-month protocol	-1.7415	0.0166667	0.057727	Not Significant
C4BPB_PAPAN	PCMV/PRV vs 3-month protocol	-1.74452	0.0333333	0.0862319	Not Significant
EPS8L1_PAPAN	PCMV/PRV vs 3-month protocol	-1.75284	0.0333333	0.0862319	Not Significant
ADIPOQ_PIG	PCMV/PRV vs 3-month protocol	-1.75354	0.0166667	0.057727	Not Significant
APOC3_PAPAN	PCMV/PRV vs 3-month protocol	-1.75381	0.0166667	0.057727	Not Significant
SEC11A_PIG	PCMV/PRV vs 3-month protocol	-1.75585	0.0333333	0.0862319	Not Significant
HHIP_PAPAN	PCMV/PRV vs 3-month protocol	-1.75876	0.116667	0.212888	Not Significant
CTBS_PAPAN	PCMV/PRV vs 3-month protocol	-1.76268	0.0166667	0.057727	Not Significant
FBLN1_PAPAN	PCMV/PRV vs 3-month protocol	-1.77439	0.0333333	0.0862319	Not Significant
SERPINC1_PAPAN	PCMV/PRV vs 3-month protocol	-1.77834	0.0166667	0.057727	Not Significant
HABP2_PAPAN	PCMV/PRV vs 3-month protocol	-1.77974	0.0166667	0.057727	Not Significant
MRPL19_PAPAN	PCMV/PRV vs 3-month protocol	-1.78094	0.0166667	0.057727	Not Significant
RBP4_PAPAN	PCMV/PRV vs 3-month protocol	-1.78324	0.0166667	0.057727	Not Significant
KLKB1_PAPAN	PCMV/PRV vs 3-month protocol	-1.78346	0.0166667	0.057727	Not Significant
APOL1_PAPAN	PCMV/PRV vs 3-month protocol	-1.78439	0.116667	0.212888	Not Significant
C8B_PAPAN	PCMV/PRV vs 3-month protocol	-1.78566	0.0166667	0.057727	Not Significant
DPEP2_PAPAN	PCMV/PRV vs 3-month protocol	-1.78941	0.0333333	0.0862319	Not Significant
LOC100523213_PIG	PCMV/PRV vs 3-month protocol	-1.79161	0.0666667	0.142029	Not Significant
USP5_PAPAN	PCMV/PRV vs 3-month protocol	-1.79915	0.0166667	0.057727	Not Significant
CTSF_PAPAN	PCMV/PRV vs 3-month protocol	-1.80663	0.0166667	0.057727	Not Significant
C7_PIG	PCMV/PRV vs 3-month protocol	-1.81509	0.0666667	0.142029	Not Significant
ORM1_PAPAN	PCMV/PRV vs 3-month protocol	-1.81795	0.0166667	0.057727	Not Significant
IL36RN_PAPAN	PCMV/PRV vs 3-month protocol	-1.81818	0.0666667	0.142029	Not Significant
F12_PAPAN	PCMV/PRV vs 3-month protocol	-1.82274	0.0166667	0.057727	Not Significant
CRISPLD2_PAPAN	PCMV/PRV vs 3-month protocol	-1.82568	0.0166667	0.057727	Not Significant
LOC100302368_PIG	PCMV/PRV vs 3-month protocol	-1.82876	0.0166667	0.057727	Not Significant
CPQ_PAPAN	PCMV/PRV vs 3-month protocol	-1.83018	0.0166667	0.057727	Not Significant
CFB_PIG	PCMV/PRV vs 3-month protocol	-1.83286	0.0166667	0.057727	Not Significant
SNRPF_PIG	PCMV/PRV vs 3-month protocol	-1.83288	0.0166667	0.057727	Not Significant
APOA1_PIG	PCMV/PRV vs 3-month protocol	-1.8339	0.0666667	0.142029	Not Significant
F9_PAPAN	PCMV/PRV vs 3-month protocol	-1.83559	0.0166667	0.057727	Not Significant
PEBP4_PAPAN	PCMV/PRV vs 3-month protocol	-1.83641	0.0166667	0.057727	Not Significant
LYZ_PAPAN	PCMV/PRV vs 3-month protocol	-1.83791	0.0166667	0.057727	Not Significant
CBR3_PAPAN	PCMV/PRV vs 3-month protocol	-1.8418	0.0166667	0.057727	Not Significant
CUL4A_PAPAN	PCMV/PRV vs 3-month protocol	-1.84792	0.0166667	0.057727	Not Significant
SULT2B1_PAPAN	PCMV/PRV vs 3-month protocol	-1.84939	0.0166667	0.057727	Not Significant
PDLIM3_PAPAN	PCMV/PRV vs 3-month protocol	-1.85138	0.383333	0.502465	Not Significant
GPX3_PAPAN	PCMV/PRV vs 3-month protocol	-1.85293	0.0166667	0.057727	Not Significant
HMGCL_PAPAN	PCMV/PRV vs 3-month protocol	-1.85601	0.0166667	0.057727	Not Significant
GAN_PAPAN	PCMV/PRV vs 3-month protocol	-1.86031	0.0166667	0.057727	Not Significant
PAPLN_PAPAN	PCMV/PRV vs 3-month protocol	-1.86688	0.0166667	0.057727	Not Significant
PECR_PAPAN	PCMV/PRV vs 3-month protocol	-1.86772	0.0666667	0.142029	Not Significant
MAPK12_PAPAN	PCMV/PRV vs 3-month protocol	-1.87174	0.0166667	0.057727	Not Significant
IGKC_PAPAN	PCMV/PRV vs 3-month protocol	-1.87264	0.0666667	0.142029	Not Significant
MASP2_PAPAN	PCMV/PRV vs 3-month protocol	-1.88179	0.0166667	0.057727	Not Significant
MCCC1_PAPAN	PCMV/PRV vs 3-month protocol	-1.88253	0.0166667	0.057727	Not Significant
QPCT_PAPAN	PCMV/PRV vs 3-month protocol	-1.88486	0.0166667	0.057727	Not Significant
RPS11_PIG	PCMV/PRV vs 3-month protocol	-1.88515	0.0666667	0.142029	Not Significant
SAA4_PAPAN	PCMV/PRV vs 3-month protocol	-1.8864	0.0166667	0.057727	Not Significant
USP9X_PAPAN	PCMV/PRV vs 3-month protocol	-1.88721	0.0166667	0.057727	Not Significant
VMO1_PAPAN	PCMV/PRV vs 3-month protocol	-1.88796	0.0166667	0.057727	Not Significant
AHSG_PAPAN	PCMV/PRV vs 3-month protocol	-1.90194	0.0166667	0.057727	Not Significant
PROZ_PAPAN	PCMV/PRV vs 3-month protocol	-1.902	0.0166667	0.057727	Not Significant
ALDH5A1_PAPAN	PCMV/PRV vs 3-month protocol	-1.90594	0.0166667	0.057727	Not Significant
PON1_PAPAN	PCMV/PRV vs 3-month protocol	-1.91256	0.0166667	0.057727	Not Significant
BPIFB1_PAPAN	PCMV/PRV vs 3-month protocol	-1.9131	0.183333	0.290889	Not Significant
SERPIND1_PIG	PCMV/PRV vs 3-month protocol	-1.91763	0.0166667	0.057727	Not Significant
DMKN_PAPAN	PCMV/PRV vs 3-month protocol	-1.91779	0.0333333	0.0862319	Not Significant
SFRP1_PAPAN	PCMV/PRV vs 3-month protocol	-1.92241	0.116667	0.212888	Not Significant
CRYBG2_PAPAN	PCMV/PRV vs 3-month protocol	-1.92253	0.0666667	0.142029	Not Significant
PIPOX_PAPAN	PCMV/PRV vs 3-month protocol	-1.92329	0.0166667	0.057727	Not Significant
F2_PAPAN	PCMV/PRV vs 3-month protocol	-1.93413	0.0166667	0.057727	Not Significant
PGLYRP2_PAPAN	PCMV/PRV vs 3-month protocol	-1.93806	0.0333333	0.0862319	Not Significant
KNG1_PAPAN	PCMV/PRV vs 3-month protocol	-1.94109	0.0166667	0.057727	Not Significant
RDH10_PAPAN	PCMV/PRV vs 3-month protocol	-1.94484	0.0166667	0.057727	Not Significant
CLEC3B_PAPAN	PCMV/PRV vs 3-month protocol	-1.95052	0.0166667	0.057727	Not Significant
C6orf120_PAPAN	PCMV/PRV vs 3-month protocol	-1.95338	0.0166667	0.057727	Not Significant
ITIH4_PAPAN	PCMV/PRV vs 3-month protocol	-1.95704	0.0166667	0.057727	Not Significant
SERPIND1_PAPAN	PCMV/PRV vs 3-month protocol	-1.96169	0.0166667	0.057727	Not Significant
HOOK1_PAPAN	PCMV/PRV vs 3-month protocol	-1.96263	0.0166667	0.057727	Not Significant
SERPINA1_PAPAN	PCMV/PRV vs 3-month protocol	-1.96398	0.0166667	0.057727	Not Significant
SERPINA1_PIG	PCMV/PRV vs 3-month protocol	-1.96555	0.0166667	0.057727	Not Significant
ESAM_PAPAN	PCMV/PRV vs 3-month protocol	-1.96681	0.0166667	0.057727	Not Significant
CD40LG_PAPAN	PCMV/PRV vs 3-month protocol	-1.96797	0.0166667	0.057727	Not Significant
AOC3_PAPAN	PCMV/PRV vs 3-month protocol	-1.96807	0.0166667	0.057727	Not Significant
SPINK1_PAPAN	PCMV/PRV vs 3-month protocol	-1.96861	0.0333333	0.0862319	Not Significant
CASZ1_PIG	PCMV/PRV vs 3-month protocol	-1.97864	0.0166667	0.057727	Not Significant
IFIT1B_PAPAN	PCMV/PRV vs 3-month protocol	-1.98367	0.0166667	0.057727	Not Significant
ITIH1_PAPAN	PCMV/PRV vs 3-month protocol	-1.99035	0.0166667	0.057727	Not Significant
THBS1_PAPAN	PCMV/PRV vs 3-month protocol	-1.99487	0.0166667	0.057727	Not Significant
F13B_PAPAN	PCMV/PRV vs 3-month protocol	-1.99875	0.0166667	0.057727	Not Significant
CCN5_PAPAN	PCMV/PRV vs 3-month protocol	-2.00229	0.0333333	0.0862319	Not Significant
FLT1_PAPAN	PCMV/PRV vs 3-month protocol	-2.00331	0.183333	0.290889	Not Significant
BPIFA2_PAPAN	PCMV/PRV vs 3-month protocol	-2.01586	0.266667	0.385314	Not Significant
IGFALS_PAPAN	PCMV/PRV vs 3-month protocol	-2.02063	0.0166667	0.057727	Not Significant
SERPINA4_PAPAN	PCMV/PRV vs 3-month protocol	-2.02111	0.0166667	0.057727	Not Significant
SYNGR2_PAPAN	PCMV/PRV vs 3-month protocol	-2.0214	0.0166667	0.057727	Not Significant
GPLD1_PAPAN	PCMV/PRV vs 3-month protocol	-2.02288	0.0333333	0.0862319	Not Significant
SELE_PAPAN	PCMV/PRV vs 3-month protocol	-2.02423	0.0666667	0.142029	Not Significant
ESYT1_PAPAN	PCMV/PRV vs 3-month protocol	-2.02538	0.0166667	0.057727	Not Significant
CNOT1_PIG	PCMV/PRV vs 3-month protocol	-2.0304	0.0166667	0.057727	Not Significant
CPB2_PAPAN	PCMV/PRV vs 3-month protocol	-2.03054	0.0166667	0.057727	Not Significant
GSDMA_PIG	PCMV/PRV vs 3-month protocol	-2.03732	0.0333333	0.0862319	Not Significant
HSD17B12_PAPAN	PCMV/PRV vs 3-month protocol	-2.04517	0.0666667	0.142029	Not Significant
CDH5_PAPAN	PCMV/PRV vs 3-month protocol	-2.04904	0.0166667	0.057727	Not Significant
SERPINF2_PAPAN	PCMV/PRV vs 3-month protocol	-2.04997	0.0166667	0.057727	Not Significant
PALM3_PAPAN	PCMV/PRV vs 3-month protocol	-2.05639	0.0666667	0.142029	Not Significant
TFPI_PAPAN	PCMV/PRV vs 3-month protocol	-2.06507	0.0166667	0.057727	Not Significant
DSC1_PAPAN	PCMV/PRV vs 3-month protocol	-2.07951	0.0666667	0.142029	Not Significant
VSIG8_PAPAN	PCMV/PRV vs 3-month protocol	-2.07966	0.0166667	0.057727	Not Significant
LCAT_PAPAN	PCMV/PRV vs 3-month protocol	-2.08021	0.0166667	0.057727	Not Significant
NEMF_PAPAN	PCMV/PRV vs 3-month protocol	-2.08176	0.0166667	0.057727	Not Significant
CFP_PAPAN	PCMV/PRV vs 3-month protocol	-2.09386	0.0166667	0.057727	Not Significant
F7_PAPAN	PCMV/PRV vs 3-month protocol	-2.09946	0.0166667	0.057727	Not Significant
HGFAC_PAPAN	PCMV/PRV vs 3-month protocol	-2.10358	0.0333333	0.0862319	Not Significant
DGKA_PAPAN	PCMV/PRV vs 3-month protocol	-2.10603	0.0333333	0.0862319	Not Significant
HSPD1_PIG	PCMV/PRV vs 3-month protocol	-2.11339	0.0166667	0.057727	Not Significant
MMADHC_PAPAN	PCMV/PRV vs 3-month protocol	-2.1334	0.0166667	0.057727	Not Significant
PDGFD_PAPAN	PCMV/PRV vs 3-month protocol	-2.13714	0.0166667	0.057727	Not Significant
PLTP_PAPAN	PCMV/PRV vs 3-month protocol	-2.13826	0.0166667	0.057727	Not Significant
RELN_PAPAN	PCMV/PRV vs 3-month protocol	-2.14529	0.0166667	0.057727	Not Significant
C8A_PAPAN	PCMV/PRV vs 3-month protocol	-2.1463	0.0166667	0.057727	Not Significant
GXYLT1_PAPAN	PCMV/PRV vs 3-month protocol	-2.1466	0.0166667	0.057727	Not Significant
IL18_PAPAN	PCMV/PRV vs 3-month protocol	-2.15767	0.0333333	0.0862319	Not Significant
LOC110261685_PIG	PCMV/PRV vs 3-month protocol	-2.15801	0.0166667	0.057727	Not Significant
CP_PAPAN	PCMV/PRV vs 3-month protocol	-2.16835	0.0166667	0.057727	Not Significant
SPAG9_PAPAN	PCMV/PRV vs 3-month protocol	-2.1808	0.0166667	0.057727	Not Significant
CHL1_PAPAN	PCMV/PRV vs 3-month protocol	-2.18652	0.0333333	0.0862319	Not Significant
DCD_PAPAN	PCMV/PRV vs 3-month protocol	-2.18957	0.0333333	0.0862319	Not Significant
PROS1_PIG	PCMV/PRV vs 3-month protocol	-2.19166	0.0166667	0.057727	Not Significant
SRP68_PAPAN	PCMV/PRV vs 3-month protocol	-2.19637	0.0166667	0.057727	Not Significant
SMPDL3A_PAPAN	PCMV/PRV vs 3-month protocol	-2.20168	0.0166667	0.057727	Not Significant
APOD_PIG	PCMV/PRV vs 3-month protocol	-2.20948	0.0166667	0.057727	Not Significant
SERPINA5_PAPAN	PCMV/PRV vs 3-month protocol	-2.21233	0.0166667	0.057727	Not Significant
PLVAP_PAPAN	PCMV/PRV vs 3-month protocol	-2.22649	0.0166667	0.057727	Not Significant
MEGF8_PAPAN	PCMV/PRV vs 3-month protocol	-2.23093	0.0166667	0.057727	Not Significant
PEAK3_PAPAN	PCMV/PRV vs 3-month protocol	-2.24953	0.0166667	0.057727	Not Significant
CLEC3B_PIG	PCMV/PRV vs 3-month protocol	-2.25331	0.0166667	0.057727	Not Significant
CALD1_PAPAN	PCMV/PRV vs 3-month protocol	-2.28031	0.0166667	0.057727	Not Significant
FBLN1_PIG	PCMV/PRV vs 3-month protocol	-2.28301	0.0166667	0.057727	Not Significant
LRPPRC_PIG	PCMV/PRV vs 3-month protocol	-2.28412	0.0166667	0.057727	Not Significant
F10_PAPAN	PCMV/PRV vs 3-month protocol	-2.28541	0.0166667	0.057727	Not Significant
ALB_PAPAN	PCMV/PRV vs 3-month protocol	-2.28659	0.0166667	0.057727	Not Significant
THSD7A_PAPAN	PCMV/PRV vs 3-month protocol	-2.28737	0.0166667	0.057727	Not Significant
EGFR_PAPAN	PCMV/PRV vs 3-month protocol	-2.30388	0.0166667	0.057727	Not Significant
DSG1_PAPAN	PCMV/PRV vs 3-month protocol	-2.30914	0.0166667	0.057727	Not Significant
ECHDC2_PAPAN	PCMV/PRV vs 3-month protocol	-2.31132	0.0166667	0.057727	Not Significant
RANBP2_PAPAN	PCMV/PRV vs 3-month protocol	-2.31513	0.0333333	0.0862319	Not Significant
SERPINA3_PAPAN	PCMV/PRV vs 3-month protocol	-2.31619	0.0333333	0.0862319	Not Significant
SEMA4B_PIG	PCMV/PRV vs 3-month protocol	-2.32159	0.0166667	0.057727	Not Significant
F12_PIG	PCMV/PRV vs 3-month protocol	-2.33131	0.0166667	0.057727	Not Significant
C1orf116_PAPAN	PCMV/PRV vs 3-month protocol	-2.33203	0.0166667	0.057727	Not Significant
PROC_PAPAN	PCMV/PRV vs 3-month protocol	-2.34977	0.0166667	0.057727	Not Significant
SUSD1_PAPAN	PCMV/PRV vs 3-month protocol	-2.36002	0.0166667	0.057727	Not Significant
GOLGA2_PAPAN	PCMV/PRV vs 3-month protocol	-2.37746	0.0166667	0.057727	Not Significant
MYLK_PAPAN	PCMV/PRV vs 3-month protocol	-2.38491	0.0166667	0.057727	Not Significant
TINAGL1_PAPAN	PCMV/PRV vs 3-month protocol	-2.39224	0.0166667	0.057727	Not Significant
PROS1_PAPAN	PCMV/PRV vs 3-month protocol	-2.40612	0.0166667	0.057727	Not Significant
ITIH2_PAPAN	PCMV/PRV vs 3-month protocol	-2.41009	0.0166667	0.057727	Not Significant
UPP1_PAPAN	PCMV/PRV vs 3-month protocol	-2.41419	0.0166667	0.057727	Not Significant
RNASET2_PAPAN	PCMV/PRV vs 3-month protocol	-2.41528	0.0166667	0.057727	Not Significant
LUM_PIG	PCMV/PRV vs 3-month protocol	-2.43431	0.0666667	0.142029	Not Significant
IGLV9-49_PAPAN	PCMV/PRV vs 3-month protocol	-2.43722	0.116667	0.212888	Not Significant
ANO6_PAPAN	PCMV/PRV vs 3-month protocol	-2.45806	0.0333333	0.0862319	Not Significant
C3_PIG	PCMV/PRV vs 3-month protocol	-2.46481	0.0166667	0.057727	Not Significant
PON2_PAPAN	PCMV/PRV vs 3-month protocol	-2.46693	0.0166667	0.057727	Not Significant
ADAMTS13_PAPAN	PCMV/PRV vs 3-month protocol	-2.47026	0.0166667	0.057727	Not Significant
NBEAL2_PAPAN	PCMV/PRV vs 3-month protocol	-2.47239	0.0166667	0.057727	Not Significant
DHRS9_PAPAN	PCMV/PRV vs 3-month protocol	-2.47361	0.0166667	0.057727	Not Significant
PTBP3_PIG	PCMV/PRV vs 3-month protocol	-2.47467	0.0166667	0.057727	Not Significant
APOA4_PAPAN	PCMV/PRV vs 3-month protocol	-2.48167	0.0166667	0.057727	Not Significant
PARP4_PAPAN	PCMV/PRV vs 3-month protocol	-2.49102	0.0166667	0.057727	Not Significant
KRT78_PAPAN	PCMV/PRV vs 3-month protocol	-2.5	0.0166667	0.057727	Not Significant
AFDN_PAPAN	PCMV/PRV vs 3-month protocol	-2.50368	0.0166667	0.057727	Not Significant
BCHE_PAPAN	PCMV/PRV vs 3-month protocol	-2.51651	0.0166667	0.057727	Not Significant
SSC5D_PAPAN	PCMV/PRV vs 3-month protocol	-2.53221	0.0166667	0.057727	Not Significant
MMRN1_PAPAN	PCMV/PRV vs 3-month protocol	-2.54164	0.0166667	0.057727	Not Significant
PPP1R13L_PAPAN	PCMV/PRV vs 3-month protocol	-2.55042	0.0166667	0.057727	Not Significant
TNFSF12_PAPAN	PCMV/PRV vs 3-month protocol	-2.55066	0.0166667	0.057727	Not Significant
ICAM4_PAPAN	PCMV/PRV vs 3-month protocol	-2.55291	0.0333333	0.0862319	Not Significant
CAVIN2_PAPAN	PCMV/PRV vs 3-month protocol	-2.55602	0.0166667	0.057727	Not Significant
ACSF2_PAPAN	PCMV/PRV vs 3-month protocol	-2.55626	0.0166667	0.057727	Not Significant
DHODH_PAPAN	PCMV/PRV vs 3-month protocol	-2.55927	0.116667	0.212888	Not Significant
GC_PAPAN	PCMV/PRV vs 3-month protocol	-2.56126	0.0166667	0.057727	Not Significant
ITGAV_PAPAN	PCMV/PRV vs 3-month protocol	-2.61674	0.0166667	0.057727	Not Significant
ATRN_PAPAN	PCMV/PRV vs 3-month protocol	-2.62178	0.0166667	0.057727	Not Significant
APCS_PAPAN	PCMV/PRV vs 3-month protocol	-2.63754	0.0166667	0.057727	Not Significant
FAT1_PAPAN	PCMV/PRV vs 3-month protocol	-2.66813	0.0166667	0.057727	Not Significant
MEAK7_PAPAN	PCMV/PRV vs 3-month protocol	-2.71988	0.0166667	0.057727	Not Significant
PCYOX1_PAPAN	PCMV/PRV vs 3-month protocol	-2.72692	0.0166667	0.057727	Not Significant
PZP_PIG	PCMV/PRV vs 3-month protocol	-2.73759	0.0166667	0.057727	Not Significant
LNPK_PAPAN	PCMV/PRV vs 3-month protocol	-2.75649	0.0333333	0.0862319	Not Significant
AZGP1_PAPAN	PCMV/PRV vs 3-month protocol	-2.77072	0.0166667	0.057727	Not Significant
HRG_PAPAN	PCMV/PRV vs 3-month protocol	-2.77541	0.0166667	0.057727	Not Significant
ABCC1_PAPAN	PCMV/PRV vs 3-month protocol	-2.8017	0.0166667	0.057727	Not Significant
A2M_PIG	PCMV/PRV vs 3-month protocol	-2.81124	0.0166667	0.057727	Not Significant
TF_PAPAN	PCMV/PRV vs 3-month protocol	-2.82642	0.0166667	0.057727	Not Significant
CST6_PAPAN	PCMV/PRV vs 3-month protocol	-2.83227	0.0166667	0.057727	Not Significant
ACSS2_PAPAN	PCMV/PRV vs 3-month protocol	-2.83887	0.0166667	0.057727	Not Significant
RRP12_PAPAN	PCMV/PRV vs 3-month protocol	-2.85084	0.0166667	0.057727	Not Significant
SCUBE1_PAPAN	PCMV/PRV vs 3-month protocol	-2.85965	0.0166667	0.057727	Not Significant
A1BG_PAPAN	PCMV/PRV vs 3-month protocol	-2.92663	0.0166667	0.057727	Not Significant
TNFSF13_PAPAN	PCMV/PRV vs 3-month protocol	-3.02625	0.0166667	0.057727	Not Significant
PPBP_PAPAN	PCMV/PRV vs 3-month protocol	-3.03708	0.0166667	0.057727	Not Significant
SLC27A4_PAPAN	PCMV/PRV vs 3-month protocol	-3.14791	0.0166667	0.057727	Not Significant
CRP_PAPAN	PCMV/PRV vs 3-month protocol	-3.15844	0.0666667	0.142029	Not Significant
AFM_PAPAN	PCMV/PRV vs 3-month protocol	-3.19529	0.0166667	0.057727	Not Significant
TTR_PAPAN	PCMV/PRV vs 3-month protocol	-3.25582	0.0166667	0.057727	Not Significant
HRG_PIG	PCMV/PRV vs 3-month protocol	-3.2958	0.0166667	0.057727	Not Significant
FGFBP1_PAPAN	PCMV/PRV vs 3-month protocol	-3.35789	0.0333333	0.0862319	Not Significant
TACSTD2_PAPAN	PCMV/PRV vs 3-month protocol	-3.38404	0.0166667	0.057727	Not Significant
PF4V1_PAPAN	PCMV/PRV vs 3-month protocol	-3.47085	0.0166667	0.057727	Not Significant
PEAR1_PAPAN	PCMV/PRV vs 3-month protocol	-3.49847	0.0166667	0.057727	Not Significant
SFRP1_PIG	PCMV/PRV vs 3-month protocol	-3.55329	0.0666667	0.142029	Not Significant
SUN2_PAPAN	PCMV/PRV vs 3-month protocol	-3.61696	0.0166667	0.057727	Not Significant
CETP_PAPAN	PCMV/PRV vs 3-month protocol	-3.79679	0.0333333	0.0862319	Not Significant
HPX_PAPAN	PCMV/PRV vs 3-month protocol	-4.40621	0.0166667	0.057727	Not Significant
DHCR24_PAPAN	PCMV/PRV vs 3-month protocol	-4.84933	0.0166667	0.057727	Not Significant
LOC100517145_PIG	PCMV/PRV vs 3-month protocol	-5.41752	0.0166667	0.057727	Not Significant

## Sheet: 6-month vs 3-month protocol
Gene	Comparison	Log2FC	p_value	p_adj	Significance
CPS1_PAPAN	6-month protocol vs 3-month protocol	3.57605	0.0166667	0.544444	Not Significant
LBP_PAPAN	6-month protocol vs 3-month protocol	2.75513	0.183333	0.882755	Not Significant
ADH7_PAPAN	6-month protocol vs 3-month protocol	2.64744	0.116667	0.81325	Not Significant
ECI1_PAPAN	6-month protocol vs 3-month protocol	2.39255	0.0166667	0.544444	Not Significant
H1-5_PAPAN	6-month protocol vs 3-month protocol	2.29855	0.0666667	0.745414	Not Significant
CKM_PIG	6-month protocol vs 3-month protocol	2.20471	0.183333	0.882755	Not Significant
ECHS1_PAPAN	6-month protocol vs 3-month protocol	1.94727	0.116667	0.81325	Not Significant
ITLN1_PAPAN	6-month protocol vs 3-month protocol	1.9168	0.383333	0.933674	Not Significant
ECM1_PIG	6-month protocol vs 3-month protocol	1.90838	0.116667	0.81325	Not Significant
PTGES3_PIG	6-month protocol vs 3-month protocol	1.87285	0.0666667	0.745414	Not Significant
IGFBP2_PAPAN	6-month protocol vs 3-month protocol	1.81921	0.0166667	0.544444	Not Significant
GLUD1_PAPAN	6-month protocol vs 3-month protocol	1.77062	0.116667	0.81325	Not Significant
CHI3L1_PIG	6-month protocol vs 3-month protocol	1.7431	0.0666667	0.745414	Not Significant
PYGM_PAPAN	6-month protocol vs 3-month protocol	1.70865	0.666667	0.955001	Not Significant
PKM_PIG	6-month protocol vs 3-month protocol	1.60992	0.266667	0.906667	Not Significant
ACY1_PAPAN	6-month protocol vs 3-month protocol	1.55669	0.116667	0.81325	Not Significant
SQOR_PIG	6-month protocol vs 3-month protocol	1.52092	0.383333	0.933674	Not Significant
MDH2_PAPAN	6-month protocol vs 3-month protocol	1.50304	0.0333333	0.685597	Not Significant
NPTN_PAPAN	6-month protocol vs 3-month protocol	1.46334	0.266667	0.906667	Not Significant
RPL23A_PIG	6-month protocol vs 3-month protocol	1.44305	0.0166667	0.544444	Not Significant
RPS6_PIG	6-month protocol vs 3-month protocol	1.42269	0.116667	0.81325	Not Significant
CR2_PAPAN	6-month protocol vs 3-month protocol	1.41636	0.833333	0.990959	Not Significant
ALDOB_PAPAN	6-month protocol vs 3-month protocol	1.40128	0.0666667	0.745414	Not Significant
HOGA1_PAPAN	6-month protocol vs 3-month protocol	1.37968	0.0666667	0.745414	Not Significant
METTL7A_PAPAN	6-month protocol vs 3-month protocol	1.36095	0.0333333	0.685597	Not Significant
RRBP1_PAPAN	6-month protocol vs 3-month protocol	1.35946	0.0333333	0.685597	Not Significant
ALPK3_PAPAN	6-month protocol vs 3-month protocol	1.32747	0.0666667	0.745414	Not Significant
ADH4_PAPAN	6-month protocol vs 3-month protocol	1.31035	0.383333	0.933674	Not Significant
SARDH_PAPAN	6-month protocol vs 3-month protocol	1.30333	0.116667	0.81325	Not Significant
CD177_PAPAN	6-month protocol vs 3-month protocol	1.29574	0.116667	0.81325	Not Significant
MDH1_PIG	6-month protocol vs 3-month protocol	1.26931	0.183333	0.882755	Not Significant
SVEP1_PAPAN	6-month protocol vs 3-month protocol	1.26264	0.0333333	0.685597	Not Significant
TEX264_PAPAN	6-month protocol vs 3-month protocol	1.24108	0.666667	0.955001	Not Significant
NCSTN_PAPAN	6-month protocol vs 3-month protocol	1.23038	0.266667	0.906667	Not Significant
THBS4_PIG	6-month protocol vs 3-month protocol	1.20499	0.383333	0.933674	Not Significant
ANXA1_PAPAN	6-month protocol vs 3-month protocol	1.19477	0.0333333	0.685597	Not Significant
SVEP1_PIG	6-month protocol vs 3-month protocol	1.16227	0.116667	0.81325	Not Significant
HMOX1_PAPAN	6-month protocol vs 3-month protocol	1.15419	0.183333	0.882755	Not Significant
SUB1_PIG	6-month protocol vs 3-month protocol	1.14872	0.0166667	0.544444	Not Significant
DCXR_PAPAN	6-month protocol vs 3-month protocol	1.13939	0.266667	0.906667	Not Significant
WARS1_PAPAN	6-month protocol vs 3-month protocol	1.12182	0.116667	0.81325	Not Significant
CLU_PIG	6-month protocol vs 3-month protocol	1.1199	0.266667	0.906667	Not Significant
TRIM72_PAPAN	6-month protocol vs 3-month protocol	1.11802	0.266667	0.906667	Not Significant
ACOX1_PAPAN	6-month protocol vs 3-month protocol	1.10875	0.116667	0.81325	Not Significant
SLC4A1_PAPAN	6-month protocol vs 3-month protocol	1.1066	0.183333	0.882755	Not Significant
GSTM4_PAPAN	6-month protocol vs 3-month protocol	1.10599	0.266667	0.906667	Not Significant
LTF_PAPAN	6-month protocol vs 3-month protocol	1.10399	0.516667	0.946938	Not Significant
XDH_PAPAN	6-month protocol vs 3-month protocol	1.0975	0.0166667	0.544444	Not Significant
MYO18A_PAPAN	6-month protocol vs 3-month protocol	1.08157	0.116667	0.81325	Not Significant
HGD_PAPAN	6-month protocol vs 3-month protocol	1.07425	0.266667	0.906667	Not Significant
VSIG4_PAPAN	6-month protocol vs 3-month protocol	1.07224	0.266667	0.906667	Not Significant
RANGAP1_PAPAN	6-month protocol vs 3-month protocol	1.07107	0.383333	0.933674	Not Significant
CFH_PIG	6-month protocol vs 3-month protocol	1.06871	0.383333	0.933674	Not Significant
BAAT_PAPAN	6-month protocol vs 3-month protocol	1.05883	0.183333	0.882755	Not Significant
DLD_PAPAN	6-month protocol vs 3-month protocol	1.04944	0.0333333	0.685597	Not Significant
GLS_PIG	6-month protocol vs 3-month protocol	1.02579	0.516667	0.946938	Not Significant
SCP2_PAPAN	6-month protocol vs 3-month protocol	1.01337	0.666667	0.955001	Not Significant
EPB42_PAPAN	6-month protocol vs 3-month protocol	1.01262	0.266667	0.906667	Not Significant
RPS25_PIG	6-month protocol vs 3-month protocol	1.00478	0.116667	0.81325	Not Significant
TMEM40_PAPAN	6-month protocol vs 3-month protocol	1.00356	0.383333	0.933674	Not Significant
MYH9_PAPAN	6-month protocol vs 3-month protocol	0.995975	0.383333	0.933674	Not Significant
XRCC5_PAPAN	6-month protocol vs 3-month protocol	0.988991	0.383333	0.933674	Not Significant
ITGA6_PAPAN	6-month protocol vs 3-month protocol	0.946738	0.266667	0.906667	Not Significant
PLCG2_PAPAN	6-month protocol vs 3-month protocol	0.919872	0.183333	0.882755	Not Significant
HPD_PAPAN	6-month protocol vs 3-month protocol	0.916948	0.266667	0.906667	Not Significant
TSG101_PAPAN	6-month protocol vs 3-month protocol	0.908935	0.0666667	0.745414	Not Significant
LDHB_PIG	6-month protocol vs 3-month protocol	0.903011	0.383333	0.933674	Not Significant
BHMT_PAPAN	6-month protocol vs 3-month protocol	0.901293	0.116667	0.81325	Not Significant
PALLD_PAPAN	6-month protocol vs 3-month protocol	0.894935	0.516667	0.946938	Not Significant
COL1A2_PAPAN	6-month protocol vs 3-month protocol	0.890724	0.266667	0.906667	Not Significant
DPP9_PAPAN	6-month protocol vs 3-month protocol	0.889748	0.0666667	0.745414	Not Significant
FAM83G_PAPAN	6-month protocol vs 3-month protocol	0.882486	0.116667	0.81325	Not Significant
CRP_PAPAN	6-month protocol vs 3-month protocol	0.881682	0.516667	0.946938	Not Significant
PCOLCE_PAPAN	6-month protocol vs 3-month protocol	0.871758	0.183333	0.882755	Not Significant
ALDH1L1_PAPAN	6-month protocol vs 3-month protocol	0.860603	0.516667	0.946938	Not Significant
ACAA1_PAPAN	6-month protocol vs 3-month protocol	0.859802	0.266667	0.906667	Not Significant
VWF_PIG	6-month protocol vs 3-month protocol	0.855444	0.116667	0.81325	Not Significant
TXNDC5_PAPAN	6-month protocol vs 3-month protocol	0.854557	0.183333	0.882755	Not Significant
ANXA7_PAPAN	6-month protocol vs 3-month protocol	0.841763	0.0666667	0.745414	Not Significant
IGFALS_PIG	6-month protocol vs 3-month protocol	0.838443	0.183333	0.882755	Not Significant
GDPD3_PAPAN	6-month protocol vs 3-month protocol	0.833835	0.266667	0.906667	Not Significant
LGALS3_PIG	6-month protocol vs 3-month protocol	0.82975	0.266667	0.906667	Not Significant
AEBP1_PIG	6-month protocol vs 3-month protocol	0.825185	0.383333	0.933674	Not Significant
LAP3_PAPAN	6-month protocol vs 3-month protocol	0.82322	0.266667	0.906667	Not Significant
CTSG_PAPAN	6-month protocol vs 3-month protocol	0.821801	0.266667	0.906667	Not Significant
TNKS1BP1_PAPAN	6-month protocol vs 3-month protocol	0.816871	0.0666667	0.745414	Not Significant
NCF1_PAPAN	6-month protocol vs 3-month protocol	0.806511	0.266667	0.906667	Not Significant
MARCKS_PAPAN	6-month protocol vs 3-month protocol	0.805068	0.183333	0.882755	Not Significant
SNRPE_PIG	6-month protocol vs 3-month protocol	0.802989	0.516667	0.946938	Not Significant
IDH1_PAPAN	6-month protocol vs 3-month protocol	0.801242	0.183333	0.882755	Not Significant
GRN_PAPAN	6-month protocol vs 3-month protocol	0.798615	0.516667	0.946938	Not Significant
BST2_PAPAN	6-month protocol vs 3-month protocol	0.792321	0.666667	0.955001	Not Significant
ESAM_PAPAN	6-month protocol vs 3-month protocol	0.790389	0.833333	0.990959	Not Significant
PCK2_PAPAN	6-month protocol vs 3-month protocol	0.785483	0.383333	0.933674	Not Significant
CHI3L1_PAPAN	6-month protocol vs 3-month protocol	0.784447	0.516667	0.946938	Not Significant
RPL34_PIG	6-month protocol vs 3-month protocol	0.782903	0.666667	0.955001	Not Significant
ITIH3_PAPAN	6-month protocol vs 3-month protocol	0.777063	0.516667	0.946938	Not Significant
FCN1_PAPAN	6-month protocol vs 3-month protocol	0.774961	0.116667	0.81325	Not Significant
PARVG_PAPAN	6-month protocol vs 3-month protocol	0.773211	0.116667	0.81325	Not Significant
ANO6_PAPAN	6-month protocol vs 3-month protocol	0.771187	0.516667	0.946938	Not Significant
TTN_PAPAN	6-month protocol vs 3-month protocol	0.76989	0.666667	0.955001	Not Significant
HSD17B8_PAPAN	6-month protocol vs 3-month protocol	0.763131	0.666667	0.955001	Not Significant
KRT16_PAPAN	6-month protocol vs 3-month protocol	0.762906	0.833333	0.990959	Not Significant
QSOX1_PIG	6-month protocol vs 3-month protocol	0.753189	0.516667	0.946938	Not Significant
AQP1_PAPAN	6-month protocol vs 3-month protocol	0.749771	0.183333	0.882755	Not Significant
FH_PAPAN	6-month protocol vs 3-month protocol	0.748197	0.383333	0.933674	Not Significant
B4GALNT1_PAPAN	6-month protocol vs 3-month protocol	0.747623	0.266667	0.906667	Not Significant
CRABP2_PAPAN	6-month protocol vs 3-month protocol	0.74408	0.183333	0.882755	Not Significant
KLHL41_PAPAN	6-month protocol vs 3-month protocol	0.740478	0.266667	0.906667	Not Significant
CORO1A_PAPAN	6-month protocol vs 3-month protocol	0.74033	0.833333	0.990959	Not Significant
RBM39_PIG	6-month protocol vs 3-month protocol	0.739877	0.183333	0.882755	Not Significant
LUM_PIG	6-month protocol vs 3-month protocol	0.738141	0.833333	0.990959	Not Significant
VIM_PAPAN	6-month protocol vs 3-month protocol	0.73549	0.183333	0.882755	Not Significant
SORD_PAPAN	6-month protocol vs 3-month protocol	0.733789	0.666667	0.955001	Not Significant
CKB_PAPAN	6-month protocol vs 3-month protocol	0.732361	0.0166667	0.544444	Not Significant
MPP1_PAPAN	6-month protocol vs 3-month protocol	0.722267	0.383333	0.933674	Not Significant
PSMB10_PAPAN	6-month protocol vs 3-month protocol	0.722032	0.666667	0.955001	Not Significant
EFEMP1_PIG	6-month protocol vs 3-month protocol	0.720546	0.183333	0.882755	Not Significant
PSMD1_PAPAN	6-month protocol vs 3-month protocol	0.711339	0.183333	0.882755	Not Significant
OTC_PAPAN	6-month protocol vs 3-month protocol	0.711132	0.383333	0.933674	Not Significant
COL6A3_PIG	6-month protocol vs 3-month protocol	0.707092	0.383333	0.933674	Not Significant
COL5A3_PIG	6-month protocol vs 3-month protocol	0.691171	0.516667	0.946938	Not Significant
ECHDC1_PAPAN	6-month protocol vs 3-month protocol	0.690731	0.266667	0.906667	Not Significant
ITGAM_PAPAN	6-month protocol vs 3-month protocol	0.68827	0.383333	0.933674	Not Significant
STEAP3_PAPAN	6-month protocol vs 3-month protocol	0.681349	0.383333	0.933674	Not Significant
TREX2_PAPAN	6-month protocol vs 3-month protocol	0.678277	0.383333	0.933674	Not Significant
HGF_PAPAN	6-month protocol vs 3-month protocol	0.676407	0.116667	0.81325	Not Significant
LAMB3_PAPAN	6-month protocol vs 3-month protocol	0.676052	0.0166667	0.544444	Not Significant
KIF13B_PAPAN	6-month protocol vs 3-month protocol	0.675754	0.516667	0.946938	Not Significant
CAP1_PAPAN	6-month protocol vs 3-month protocol	0.67547	0.383333	0.933674	Not Significant
KRT2_PAPAN	6-month protocol vs 3-month protocol	0.666428	0.516667	0.946938	Not Significant
PCOLCE_PIG	6-month protocol vs 3-month protocol	0.660465	0.266667	0.906667	Not Significant
TNFSF13_PAPAN	6-month protocol vs 3-month protocol	0.658581	0.666667	0.955001	Not Significant
B2M_PAPAN	6-month protocol vs 3-month protocol	0.652806	0.116667	0.81325	Not Significant
FBN1_PIG	6-month protocol vs 3-month protocol	0.650867	0.183333	0.882755	Not Significant
RPL14_PIG	6-month protocol vs 3-month protocol	0.650086	0.383333	0.933674	Not Significant
NARS1_PAPAN	6-month protocol vs 3-month protocol	0.643603	0.0166667	0.544444	Not Significant
LAMA2_PAPAN	6-month protocol vs 3-month protocol	0.640166	0.266667	0.906667	Not Significant
PODN_PAPAN	6-month protocol vs 3-month protocol	0.631974	0.266667	0.906667	Not Significant
UROC1_PAPAN	6-month protocol vs 3-month protocol	0.629117	0.383333	0.933674	Not Significant
RPL7A_PIG	6-month protocol vs 3-month protocol	0.62485	0.516667	0.946938	Not Significant
HAO1_PAPAN	6-month protocol vs 3-month protocol	0.619513	0.666667	0.955001	Not Significant
FASN_PIG	6-month protocol vs 3-month protocol	0.6148	0.116667	0.81325	Not Significant
PTPRF_PIG	6-month protocol vs 3-month protocol	0.614458	0.0666667	0.745414	Not Significant
PTX3_PAPAN	6-month protocol vs 3-month protocol	0.608952	0.833333	0.990959	Not Significant
THY1_PAPAN	6-month protocol vs 3-month protocol	0.605481	0.183333	0.882755	Not Significant
XRCC6_PAPAN	6-month protocol vs 3-month protocol	0.604614	0.516667	0.946938	Not Significant
IQGAP1_PIG	6-month protocol vs 3-month protocol	0.604421	0.0666667	0.745414	Not Significant
COL3A1_PAPAN	6-month protocol vs 3-month protocol	0.603122	0.116667	0.81325	Not Significant
MYOM3_PAPAN	6-month protocol vs 3-month protocol	0.600307	0.516667	0.946938	Not Significant
ATP2B4_PAPAN	6-month protocol vs 3-month protocol	0.595919	0.0666667	0.745414	Not Significant
OAS2_PAPAN	6-month protocol vs 3-month protocol	0.593022	0.383333	0.933674	Not Significant
ATP12A_PAPAN	6-month protocol vs 3-month protocol	0.592711	0.383333	0.933674	Not Significant
KHSRP_PIG	6-month protocol vs 3-month protocol	0.587004	0.116667	0.81325	Not Significant
TUBB_PIG	6-month protocol vs 3-month protocol	0.586031	0.183333	0.882755	Not Significant
LAMC1_PAPAN	6-month protocol vs 3-month protocol	0.583261	0.516667	0.946938	Not Significant
DNPEP_PAPAN	6-month protocol vs 3-month protocol	0.581756	0.383333	0.933674	Not Significant
FST_PAPAN	6-month protocol vs 3-month protocol	0.579917	0.383333	0.933674	Not Significant
HIP1R_PIG	6-month protocol vs 3-month protocol	0.578466	0.383333	0.933674	Not Significant
KRT4_PAPAN	6-month protocol vs 3-month protocol	0.572942	0.383333	0.933674	Not Significant
H2BC4_PIG	6-month protocol vs 3-month protocol	0.568559	0.383333	0.933674	Not Significant
SHBG_PAPAN	6-month protocol vs 3-month protocol	0.568383	0.833333	0.990959	Not Significant
CSRP1_PAPAN	6-month protocol vs 3-month protocol	0.560306	0.266667	0.906667	Not Significant
PCCA_PAPAN	6-month protocol vs 3-month protocol	0.559784	0.516667	0.946938	Not Significant
SLFN5_PAPAN	6-month protocol vs 3-month protocol	0.557859	0.383333	0.933674	Not Significant
F11R_PAPAN	6-month protocol vs 3-month protocol	0.556924	0.266667	0.906667	Not Significant
CBR1_PAPAN	6-month protocol vs 3-month protocol	0.553956	0.266667	0.906667	Not Significant
ABCA12_PAPAN	6-month protocol vs 3-month protocol	0.550422	0.266667	0.906667	Not Significant
CFP_PAPAN	6-month protocol vs 3-month protocol	0.550305	0.183333	0.882755	Not Significant
ASL_PAPAN	6-month protocol vs 3-month protocol	0.545828	0.0666667	0.745414	Not Significant
BLVRB_PAPAN	6-month protocol vs 3-month protocol	0.544903	0.666667	0.955001	Not Significant
NUP205_PAPAN	6-month protocol vs 3-month protocol	0.543837	0.516667	0.946938	Not Significant
COL6A1_PIG	6-month protocol vs 3-month protocol	0.541226	0.266667	0.906667	Not Significant
TLN1_PAPAN	6-month protocol vs 3-month protocol	0.540757	0.516667	0.946938	Not Significant
ALOX15_PAPAN	6-month protocol vs 3-month protocol	0.540106	0.833333	0.990959	Not Significant
FN1_PIG	6-month protocol vs 3-month protocol	0.535265	0.383333	0.933674	Not Significant
MPO_PAPAN	6-month protocol vs 3-month protocol	0.533657	0.183333	0.882755	Not Significant
ECM2_PAPAN	6-month protocol vs 3-month protocol	0.524259	0.383333	0.933674	Not Significant
STOM_PAPAN	6-month protocol vs 3-month protocol	0.522987	0.116667	0.81325	Not Significant
DHODH_PAPAN	6-month protocol vs 3-month protocol	0.518099	0.666667	0.955001	Not Significant
RAB8B_PAPAN	6-month protocol vs 3-month protocol	0.517879	0.183333	0.882755	Not Significant
HNRNPC_PAPAN	6-month protocol vs 3-month protocol	0.516339	0.383333	0.933674	Not Significant
LNPK_PAPAN	6-month protocol vs 3-month protocol	0.513673	0.833333	0.990959	Not Significant
SPTA1_PAPAN	6-month protocol vs 3-month protocol	0.510621	0.666667	0.955001	Not Significant
C6_PAPAN	6-month protocol vs 3-month protocol	0.510293	0.266667	0.906667	Not Significant
BIN2_PAPAN	6-month protocol vs 3-month protocol	0.509501	0.516667	0.946938	Not Significant
ARG1_PAPAN	6-month protocol vs 3-month protocol	0.509071	0.833333	0.990959	Not Significant
CYFIP1_PAPAN	6-month protocol vs 3-month protocol	0.506311	0.183333	0.882755	Not Significant
RPL15_PIG	6-month protocol vs 3-month protocol	0.506189	0.383333	0.933674	Not Significant
NCL_PAPAN	6-month protocol vs 3-month protocol	0.503793	0.116667	0.81325	Not Significant
ISG15_PAPAN	6-month protocol vs 3-month protocol	0.498433	0.666667	0.955001	Not Significant
PLEK_PAPAN	6-month protocol vs 3-month protocol	0.498305	0.666667	0.955001	Not Significant
RNF213_PAPAN	6-month protocol vs 3-month protocol	0.496885	0.183333	0.882755	Not Significant
CBR3_PAPAN	6-month protocol vs 3-month protocol	0.490215	0.266667	0.906667	Not Significant
COL1A1_PAPAN	6-month protocol vs 3-month protocol	0.489176	0.383333	0.933674	Not Significant
PGAM2_PAPAN	6-month protocol vs 3-month protocol	0.48595	0.516667	0.946938	Not Significant
TIMP1_PAPAN	6-month protocol vs 3-month protocol	0.485931	0.516667	0.946938	Not Significant
FMNL1_PAPAN	6-month protocol vs 3-month protocol	0.484844	0.0666667	0.745414	Not Significant
DHRS1_PAPAN	6-month protocol vs 3-month protocol	0.483426	0.666667	0.955001	Not Significant
ILF2_PIG	6-month protocol vs 3-month protocol	0.478459	0.383333	0.933674	Not Significant
COPE_PAPAN	6-month protocol vs 3-month protocol	0.47213	0.666667	0.955001	Not Significant
MVP_PAPAN	6-month protocol vs 3-month protocol	0.469985	0.383333	0.933674	Not Significant
CA2_PAPAN	6-month protocol vs 3-month protocol	0.469847	0.666667	0.955001	Not Significant
CFL1_PIG	6-month protocol vs 3-month protocol	0.46748	0.383333	0.933674	Not Significant
FLT1_PAPAN	6-month protocol vs 3-month protocol	0.466625	1	1	Not Significant
SERPINB1_PAPAN	6-month protocol vs 3-month protocol	0.464134	0.516667	0.946938	Not Significant
FAH_PAPAN	6-month protocol vs 3-month protocol	0.460589	0.833333	0.990959	Not Significant
HMGB2_PIG	6-month protocol vs 3-month protocol	0.457692	0.516667	0.946938	Not Significant
RPS16_PIG	6-month protocol vs 3-month protocol	0.456403	0.516667	0.946938	Not Significant
SRSF3_PIG	6-month protocol vs 3-month protocol	0.456098	0.833333	0.990959	Not Significant
CD5L_PAPAN	6-month protocol vs 3-month protocol	0.454776	0.383333	0.933674	Not Significant
PLEC_PAPAN	6-month protocol vs 3-month protocol	0.452268	0.516667	0.946938	Not Significant
CD226_PAPAN	6-month protocol vs 3-month protocol	0.448409	0.266667	0.906667	Not Significant
IGLV11-55_PAPAN	6-month protocol vs 3-month protocol	0.442934	1	1	Not Significant
C1QA_PAPAN	6-month protocol vs 3-month protocol	0.441809	0.666667	0.955001	Not Significant
PC_PAPAN	6-month protocol vs 3-month protocol	0.440928	0.183333	0.882755	Not Significant
NEU2_PAPAN	6-month protocol vs 3-month protocol	0.438657	0.383333	0.933674	Not Significant
MYOT_PAPAN	6-month protocol vs 3-month protocol	0.43774	0.516667	0.946938	Not Significant
PSMD3_PAPAN	6-month protocol vs 3-month protocol	0.43575	0.266667	0.906667	Not Significant
SPTAN1_PAPAN	6-month protocol vs 3-month protocol	0.434531	0.833333	0.990959	Not Significant
SRPRB_PAPAN	6-month protocol vs 3-month protocol	0.432297	0.666667	0.955001	Not Significant
MRC1_PAPAN	6-month protocol vs 3-month protocol	0.430491	0.183333	0.882755	Not Significant
HBB_PIG	6-month protocol vs 3-month protocol	0.430093	0.266667	0.906667	Not Significant
FCGR3A_PAPAN	6-month protocol vs 3-month protocol	0.4294	0.516667	0.946938	Not Significant
PRKDC_PAPAN	6-month protocol vs 3-month protocol	0.429395	0.383333	0.933674	Not Significant
SLC22A16_PAPAN	6-month protocol vs 3-month protocol	0.42746	0.516667	0.946938	Not Significant
H6PD_PAPAN	6-month protocol vs 3-month protocol	0.427123	0.383333	0.933674	Not Significant
MTHFD1_PIG	6-month protocol vs 3-month protocol	0.425552	0.0666667	0.745414	Not Significant
CAVIN2_PAPAN	6-month protocol vs 3-month protocol	0.42073	0.666667	0.955001	Not Significant
TKT_PAPAN	6-month protocol vs 3-month protocol	0.417432	0.833333	0.990959	Not Significant
CA1_PAPAN	6-month protocol vs 3-month protocol	0.416141	0.383333	0.933674	Not Significant
ANK1_PAPAN	6-month protocol vs 3-month protocol	0.415228	0.833333	0.990959	Not Significant
KALRN_PAPAN	6-month protocol vs 3-month protocol	0.412454	0.666667	0.955001	Not Significant
ALOX12B_PAPAN	6-month protocol vs 3-month protocol	0.41205	0.266667	0.906667	Not Significant
ENO1_PAPAN	6-month protocol vs 3-month protocol	0.411588	0.516667	0.946938	Not Significant
ECI2_PAPAN	6-month protocol vs 3-month protocol	0.410966	0.116667	0.81325	Not Significant
PML_PAPAN	6-month protocol vs 3-month protocol	0.410731	0.516667	0.946938	Not Significant
ACAT1_PAPAN	6-month protocol vs 3-month protocol	0.410256	0.833333	0.990959	Not Significant
FHOD1_PAPAN	6-month protocol vs 3-month protocol	0.408018	0.833333	0.990959	Not Significant
SQOR_PAPAN	6-month protocol vs 3-month protocol	0.407011	0.266667	0.906667	Not Significant
KRT9_PAPAN	6-month protocol vs 3-month protocol	0.405066	0.833333	0.990959	Not Significant
TAGLN2_PIG	6-month protocol vs 3-month protocol	0.404968	0.666667	0.955001	Not Significant
MYH6_PAPAN	6-month protocol vs 3-month protocol	0.404495	0.266667	0.906667	Not Significant
ITIH4_PIG	6-month protocol vs 3-month protocol	0.403265	0.833333	0.990959	Not Significant
ADH6_PAPAN	6-month protocol vs 3-month protocol	0.400103	0.516667	0.946938	Not Significant
YWHAZ_PIG	6-month protocol vs 3-month protocol	0.3993	0.516667	0.946938	Not Significant
PDIA4_PAPAN	6-month protocol vs 3-month protocol	0.398145	0.116667	0.81325	Not Significant
SERPINF1_PIG	6-month protocol vs 3-month protocol	0.397003	0.516667	0.946938	Not Significant
VASP_PIG	6-month protocol vs 3-month protocol	0.395822	0.516667	0.946938	Not Significant
GPD1_PAPAN	6-month protocol vs 3-month protocol	0.39016	0.116667	0.81325	Not Significant
EIF3C_PAPAN	6-month protocol vs 3-month protocol	0.389543	0.266667	0.906667	Not Significant
FES_PAPAN	6-month protocol vs 3-month protocol	0.386483	0.383333	0.933674	Not Significant
SLC44A2_PAPAN	6-month protocol vs 3-month protocol	0.384777	0.383333	0.933674	Not Significant
PF4V1_PAPAN	6-month protocol vs 3-month protocol	0.382386	0.383333	0.933674	Not Significant
DDC_PAPAN	6-month protocol vs 3-month protocol	0.381643	0.116667	0.81325	Not Significant
PKP3_PIG	6-month protocol vs 3-month protocol	0.379813	0.383333	0.933674	Not Significant
RIPK1_PAPAN	6-month protocol vs 3-month protocol	0.371669	0.383333	0.933674	Not Significant
ETFB_PAPAN	6-month protocol vs 3-month protocol	0.369545	0.516667	0.946938	Not Significant
ADIPOQ_PIG	6-month protocol vs 3-month protocol	0.369286	0.516667	0.946938	Not Significant
KRT34_PAPAN	6-month protocol vs 3-month protocol	0.367209	0.666667	0.955001	Not Significant
EZR_PAPAN	6-month protocol vs 3-month protocol	0.365045	0.516667	0.946938	Not Significant
EIF5B_PAPAN	6-month protocol vs 3-month protocol	0.364035	0.516667	0.946938	Not Significant
CFHR5_PAPAN	6-month protocol vs 3-month protocol	0.362297	0.666667	0.955001	Not Significant
AP3D1_PAPAN	6-month protocol vs 3-month protocol	0.361252	0.0666667	0.745414	Not Significant
THBS1_PAPAN	6-month protocol vs 3-month protocol	0.360653	0.516667	0.946938	Not Significant
FYCO1_PAPAN	6-month protocol vs 3-month protocol	0.360056	0.383333	0.933674	Not Significant
NOTUM_PAPAN	6-month protocol vs 3-month protocol	0.357747	0.516667	0.946938	Not Significant
PDIA3_PAPAN	6-month protocol vs 3-month protocol	0.355842	0.383333	0.933674	Not Significant
EEF1D_PAPAN	6-month protocol vs 3-month protocol	0.354594	0.666667	0.955001	Not Significant
STC1_PAPAN	6-month protocol vs 3-month protocol	0.353847	0.516667	0.946938	Not Significant
SUCLG2_PAPAN	6-month protocol vs 3-month protocol	0.350869	0.383333	0.933674	Not Significant
ERP44_PAPAN	6-month protocol vs 3-month protocol	0.349653	0.0333333	0.685597	Not Significant
C7_PIG	6-month protocol vs 3-month protocol	0.349096	1	1	Not Significant
KRT85_PIG	6-month protocol vs 3-month protocol	0.347623	0.266667	0.906667	Not Significant
PSME2_PAPAN	6-month protocol vs 3-month protocol	0.346776	0.383333	0.933674	Not Significant
ALDH1A1_PAPAN	6-month protocol vs 3-month protocol	0.344532	0.516667	0.946938	Not Significant
PXDN_PAPAN	6-month protocol vs 3-month protocol	0.343998	0.516667	0.946938	Not Significant
ACE2_PAPAN	6-month protocol vs 3-month protocol	0.342831	0.0666667	0.745414	Not Significant
CA4_PAPAN	6-month protocol vs 3-month protocol	0.342791	0.666667	0.955001	Not Significant
PPBP_PAPAN	6-month protocol vs 3-month protocol	0.34029	0.516667	0.946938	Not Significant
ZYX_PAPAN	6-month protocol vs 3-month protocol	0.339875	0.666667	0.955001	Not Significant
MMUT_PAPAN	6-month protocol vs 3-month protocol	0.337611	0.516667	0.946938	Not Significant
COL6A6_PAPAN	6-month protocol vs 3-month protocol	0.33465	0.516667	0.946938	Not Significant
JCHAIN_PAPAN	6-month protocol vs 3-month protocol	0.333447	0.383333	0.933674	Not Significant
ACOX2_PAPAN	6-month protocol vs 3-month protocol	0.33186	0.383333	0.933674	Not Significant
RIPOR2_PAPAN	6-month protocol vs 3-month protocol	0.331806	0.666667	0.955001	Not Significant
FLNA_PIG	6-month protocol vs 3-month protocol	0.331071	0.666667	0.955001	Not Significant
FETUB_PAPAN	6-month protocol vs 3-month protocol	0.330926	0.666667	0.955001	Not Significant
BSG_PAPAN	6-month protocol vs 3-month protocol	0.330645	1	1	Not Significant
SMOC1_PAPAN	6-month protocol vs 3-month protocol	0.325374	0.833333	0.990959	Not Significant
HOOK1_PAPAN	6-month protocol vs 3-month protocol	0.32376	1	1	Not Significant
F12_PIG	6-month protocol vs 3-month protocol	0.322874	0.666667	0.955001	Not Significant
MAN2C1_PAPAN	6-month protocol vs 3-month protocol	0.321427	0.833333	0.990959	Not Significant
GDI2_PAPAN	6-month protocol vs 3-month protocol	0.32012	0.383333	0.933674	Not Significant
CPNE3_PAPAN	6-month protocol vs 3-month protocol	0.318206	0.516667	0.946938	Not Significant
GAPDH_PIG	6-month protocol vs 3-month protocol	0.318147	0.516667	0.946938	Not Significant
SERPING1_PIG	6-month protocol vs 3-month protocol	0.317277	0.516667	0.946938	Not Significant
CKMT1B_PAPAN	6-month protocol vs 3-month protocol	0.317211	0.516667	0.946938	Not Significant
CALD1_PAPAN	6-month protocol vs 3-month protocol	0.315082	0.833333	0.990959	Not Significant
MMP9_PAPAN	6-month protocol vs 3-month protocol	0.314371	0.383333	0.933674	Not Significant
SSB_PIG	6-month protocol vs 3-month protocol	0.309153	0.666667	0.955001	Not Significant
TBC1D10B_PAPAN	6-month protocol vs 3-month protocol	0.309129	0.833333	0.990959	Not Significant
MST1_PAPAN	6-month protocol vs 3-month protocol	0.308745	0.516667	0.946938	Not Significant
CD38_PAPAN	6-month protocol vs 3-month protocol	0.30795	0.833333	0.990959	Not Significant
SPON1_PAPAN	6-month protocol vs 3-month protocol	0.306894	0.833333	0.990959	Not Significant
GARS1_PAPAN	6-month protocol vs 3-month protocol	0.303777	0.666667	0.955001	Not Significant
PFN1_PAPAN	6-month protocol vs 3-month protocol	0.299484	0.666667	0.955001	Not Significant
GOLGB1_PAPAN	6-month protocol vs 3-month protocol	0.299201	0.516667	0.946938	Not Significant
TKFC_PAPAN	6-month protocol vs 3-month protocol	0.295433	0.516667	0.946938	Not Significant
SPTB_PIG	6-month protocol vs 3-month protocol	0.294857	0.516667	0.946938	Not Significant
PROZ_PAPAN	6-month protocol vs 3-month protocol	0.292541	0.666667	0.955001	Not Significant
C1QB_PAPAN	6-month protocol vs 3-month protocol	0.291849	0.516667	0.946938	Not Significant
PCCB_PAPAN	6-month protocol vs 3-month protocol	0.288872	0.666667	0.955001	Not Significant
FERMT3_PAPAN	6-month protocol vs 3-month protocol	0.288355	0.666667	0.955001	Not Significant
FBP1_PIG	6-month protocol vs 3-month protocol	0.283471	0.833333	0.990959	Not Significant
SCIN_PAPAN	6-month protocol vs 3-month protocol	0.280058	0.666667	0.955001	Not Significant
INF2_PIG	6-month protocol vs 3-month protocol	0.277492	1	1	Not Significant
BCAP31_PAPAN	6-month protocol vs 3-month protocol	0.27567	0.833333	0.990959	Not Significant
HMGCS2_PAPAN	6-month protocol vs 3-month protocol	0.274843	0.666667	0.955001	Not Significant
RCSD1_PAPAN	6-month protocol vs 3-month protocol	0.273164	0.666667	0.955001	Not Significant
EMILIN2_PAPAN	6-month protocol vs 3-month protocol	0.271949	0.266667	0.906667	Not Significant
VASP_PAPAN	6-month protocol vs 3-month protocol	0.271715	0.833333	0.990959	Not Significant
CPB2_PIG	6-month protocol vs 3-month protocol	0.270408	0.516667	0.946938	Not Significant
TNFRSF6B_PAPAN	6-month protocol vs 3-month protocol	0.270303	0.516667	0.946938	Not Significant
CP_PIG	6-month protocol vs 3-month protocol	0.269931	0.833333	0.990959	Not Significant
SERPINA3_PAPAN	6-month protocol vs 3-month protocol	0.268577	0.833333	0.990959	Not Significant
CTSB_PAPAN	6-month protocol vs 3-month protocol	0.265624	0.833333	0.990959	Not Significant
EPX_PAPAN	6-month protocol vs 3-month protocol	0.264933	0.516667	0.946938	Not Significant
IPO11_PAPAN	6-month protocol vs 3-month protocol	0.264599	0.516667	0.946938	Not Significant
DIAPH1_PAPAN	6-month protocol vs 3-month protocol	0.263708	0.666667	0.955001	Not Significant
KRT1_PAPAN	6-month protocol vs 3-month protocol	0.261547	0.833333	0.990959	Not Significant
CD44_PAPAN	6-month protocol vs 3-month protocol	0.261255	0.516667	0.946938	Not Significant
PLCB3_PIG	6-month protocol vs 3-month protocol	0.260782	0.666667	0.955001	Not Significant
THBS2_PAPAN	6-month protocol vs 3-month protocol	0.260643	0.666667	0.955001	Not Significant
TTYH3_PAPAN	6-month protocol vs 3-month protocol	0.25871	0.833333	0.990959	Not Significant
ESYT3_PAPAN	6-month protocol vs 3-month protocol	0.258061	0.833333	0.990959	Not Significant
DMGDH_PAPAN	6-month protocol vs 3-month protocol	0.257509	0.833333	0.990959	Not Significant
MDH1_PAPAN	6-month protocol vs 3-month protocol	0.25728	0.666667	0.955001	Not Significant
STAB2_PAPAN	6-month protocol vs 3-month protocol	0.255941	0.666667	0.955001	Not Significant
TRO_PAPAN	6-month protocol vs 3-month protocol	0.255361	0.666667	0.955001	Not Significant
IGFBP4_PAPAN	6-month protocol vs 3-month protocol	0.255078	0.666667	0.955001	Not Significant
RPL13A_PIG	6-month protocol vs 3-month protocol	0.254028	1	1	Not Significant
GBP3_PAPAN	6-month protocol vs 3-month protocol	0.253715	0.666667	0.955001	Not Significant
SERPINB5_PAPAN	6-month protocol vs 3-month protocol	0.252468	0.516667	0.946938	Not Significant
PTBP1_PIG	6-month protocol vs 3-month protocol	0.252149	1	1	Not Significant
ARPC1B_PAPAN	6-month protocol vs 3-month protocol	0.250225	0.266667	0.906667	Not Significant
FGR_PAPAN	6-month protocol vs 3-month protocol	0.250104	0.266667	0.906667	Not Significant
KRT80_PAPAN	6-month protocol vs 3-month protocol	0.249911	0.666667	0.955001	Not Significant
KRT5_PAPAN	6-month protocol vs 3-month protocol	0.249362	0.666667	0.955001	Not Significant
IMPA2_PAPAN	6-month protocol vs 3-month protocol	0.248782	1	1	Not Significant
GDI1_PAPAN	6-month protocol vs 3-month protocol	0.248691	1	1	Not Significant
STX11_PAPAN	6-month protocol vs 3-month protocol	0.24786	0.516667	0.946938	Not Significant
RNPEP_PAPAN	6-month protocol vs 3-month protocol	0.2472	0.266667	0.906667	Not Significant
C1S_PIG	6-month protocol vs 3-month protocol	0.245264	0.666667	0.955001	Not Significant
SELE_PAPAN	6-month protocol vs 3-month protocol	0.245253	0.666667	0.955001	Not Significant
FGL1_PAPAN	6-month protocol vs 3-month protocol	0.243445	0.666667	0.955001	Not Significant
DPYSL2_PAPAN	6-month protocol vs 3-month protocol	0.242722	0.833333	0.990959	Not Significant
QSOX1_PAPAN	6-month protocol vs 3-month protocol	0.242579	0.516667	0.946938	Not Significant
SPARCL1_PAPAN	6-month protocol vs 3-month protocol	0.24228	0.666667	0.955001	Not Significant
PTPRF_PAPAN	6-month protocol vs 3-month protocol	0.241203	0.666667	0.955001	Not Significant
PSME1_PAPAN	6-month protocol vs 3-month protocol	0.240105	1	1	Not Significant
XYLT1_PIG	6-month protocol vs 3-month protocol	0.239427	0.516667	0.946938	Not Significant
TXNRD1_PAPAN	6-month protocol vs 3-month protocol	0.239409	0.833333	0.990959	Not Significant
SF3B2_PAPAN	6-month protocol vs 3-month protocol	0.239094	0.383333	0.933674	Not Significant
C1QC_PAPAN	6-month protocol vs 3-month protocol	0.238617	0.666667	0.955001	Not Significant
CD81_PAPAN	6-month protocol vs 3-month protocol	0.238401	0.666667	0.955001	Not Significant
TSPAN9_PAPAN	6-month protocol vs 3-month protocol	0.237952	0.833333	0.990959	Not Significant
HYOU1_PAPAN	6-month protocol vs 3-month protocol	0.23735	0.666667	0.955001	Not Significant
ARHGAP6_PAPAN	6-month protocol vs 3-month protocol	0.237177	0.516667	0.946938	Not Significant
SLC16A1_PAPAN	6-month protocol vs 3-month protocol	0.236032	1	1	Not Significant
LDB3_PAPAN	6-month protocol vs 3-month protocol	0.234356	1	1	Not Significant
HSPA4_PAPAN	6-month protocol vs 3-month protocol	0.229712	0.516667	0.946938	Not Significant
COLEC11_PAPAN	6-month protocol vs 3-month protocol	0.229055	0.666667	0.955001	Not Significant
WDR1_PAPAN	6-month protocol vs 3-month protocol	0.228996	0.833333	0.990959	Not Significant
NIF3L1_PAPAN	6-month protocol vs 3-month protocol	0.228994	0.666667	0.955001	Not Significant
AGT_PAPAN	6-month protocol vs 3-month protocol	0.228892	0.666667	0.955001	Not Significant
NCAM1_PIG	6-month protocol vs 3-month protocol	0.22762	0.666667	0.955001	Not Significant
RARS1_PAPAN	6-month protocol vs 3-month protocol	0.227157	0.833333	0.990959	Not Significant
ETFDH_PAPAN	6-month protocol vs 3-month protocol	0.22708	0.666667	0.955001	Not Significant
GRHPR_PAPAN	6-month protocol vs 3-month protocol	0.226514	0.833333	0.990959	Not Significant
MYH9_PIG	6-month protocol vs 3-month protocol	0.22505	0.383333	0.933674	Not Significant
DES_PIG	6-month protocol vs 3-month protocol	0.224993	0.666667	0.955001	Not Significant
ALOXE3_PAPAN	6-month protocol vs 3-month protocol	0.22356	0.516667	0.946938	Not Significant
OAS1_PAPAN	6-month protocol vs 3-month protocol	0.223511	0.516667	0.946938	Not Significant
CKM_PAPAN	6-month protocol vs 3-month protocol	0.222544	1	1	Not Significant
ROCK2_PAPAN	6-month protocol vs 3-month protocol	0.220952	1	1	Not Significant
TPM3_PIG	6-month protocol vs 3-month protocol	0.219935	0.666667	0.955001	Not Significant
SERPINB10_PAPAN	6-month protocol vs 3-month protocol	0.219852	0.833333	0.990959	Not Significant
C9_PAPAN	6-month protocol vs 3-month protocol	0.217645	0.383333	0.933674	Not Significant
CASS4_PAPAN	6-month protocol vs 3-month protocol	0.216098	0.833333	0.990959	Not Significant
CD93_PAPAN	6-month protocol vs 3-month protocol	0.215591	0.516667	0.946938	Not Significant
SLC2A14_PAPAN	6-month protocol vs 3-month protocol	0.215465	0.666667	0.955001	Not Significant
DSG2_PAPAN	6-month protocol vs 3-month protocol	0.2141	0.833333	0.990959	Not Significant
IARS1_PAPAN	6-month protocol vs 3-month protocol	0.211587	0.666667	0.955001	Not Significant
ACIN1_PAPAN	6-month protocol vs 3-month protocol	0.211388	0.833333	0.990959	Not Significant
SLK_PAPAN	6-month protocol vs 3-month protocol	0.21132	1	1	Not Significant
PYGL_PAPAN	6-month protocol vs 3-month protocol	0.2113	0.833333	0.990959	Not Significant
ADAMTSL4_PAPAN	6-month protocol vs 3-month protocol	0.210847	1	1	Not Significant
RPS20_PIG	6-month protocol vs 3-month protocol	0.21032	0.833333	0.990959	Not Significant
AKR7L_PAPAN	6-month protocol vs 3-month protocol	0.207865	1	1	Not Significant
TNRC6B_PAPAN	6-month protocol vs 3-month protocol	0.206711	1	1	Not Significant
MMP10_PAPAN	6-month protocol vs 3-month protocol	0.205724	0.666667	0.955001	Not Significant
RASA3_PAPAN	6-month protocol vs 3-month protocol	0.20481	1	1	Not Significant
MX1_PAPAN	6-month protocol vs 3-month protocol	0.204473	0.833333	0.990959	Not Significant
SLIT2_PAPAN	6-month protocol vs 3-month protocol	0.20266	0.516667	0.946938	Not Significant
BID_PAPAN	6-month protocol vs 3-month protocol	0.202362	0.516667	0.946938	Not Significant
MMP2_PAPAN	6-month protocol vs 3-month protocol	0.202241	0.666667	0.955001	Not Significant
ACTN2_PAPAN	6-month protocol vs 3-month protocol	0.200686	0.666667	0.955001	Not Significant
HBB_PAPAN	6-month protocol vs 3-month protocol	0.199337	0.833333	0.990959	Not Significant
SEC14L2_PAPAN	6-month protocol vs 3-month protocol	0.199104	0.666667	0.955001	Not Significant
NPEPPS_PAPAN	6-month protocol vs 3-month protocol	0.197727	0.383333	0.933674	Not Significant
LRRC47_PAPAN	6-month protocol vs 3-month protocol	0.197292	0.666667	0.955001	Not Significant
PIK3R4_PAPAN	6-month protocol vs 3-month protocol	0.195939	1	1	Not Significant
ITGB2_PAPAN	6-month protocol vs 3-month protocol	0.195388	1	1	Not Significant
CBR4_PAPAN	6-month protocol vs 3-month protocol	0.195104	1	1	Not Significant
LYZ_PAPAN	6-month protocol vs 3-month protocol	0.19339	0.666667	0.955001	Not Significant
PRDX6_PAPAN	6-month protocol vs 3-month protocol	0.193175	0.516667	0.946938	Not Significant
FAM120A_PAPAN	6-month protocol vs 3-month protocol	0.19214	0.516667	0.946938	Not Significant
NOLC1_PAPAN	6-month protocol vs 3-month protocol	0.190968	1	1	Not Significant
ACO1_PAPAN	6-month protocol vs 3-month protocol	0.190433	0.833333	0.990959	Not Significant
AP3B1_PAPAN	6-month protocol vs 3-month protocol	0.189687	0.666667	0.955001	Not Significant
STEAP4_PAPAN	6-month protocol vs 3-month protocol	0.188622	0.666667	0.955001	Not Significant
KRT77_PAPAN	6-month protocol vs 3-month protocol	0.188235	0.516667	0.946938	Not Significant
DDX17_PAPAN	6-month protocol vs 3-month protocol	0.187938	0.666667	0.955001	Not Significant
MTTP_PAPAN	6-month protocol vs 3-month protocol	0.187564	1	1	Not Significant
CORO1C_PIG	6-month protocol vs 3-month protocol	0.186855	0.516667	0.946938	Not Significant
AIMP2_PAPAN	6-month protocol vs 3-month protocol	0.186581	0.516667	0.946938	Not Significant
GP1BB_PAPAN	6-month protocol vs 3-month protocol	0.186581	1	1	Not Significant
RPS7_PIG	6-month protocol vs 3-month protocol	0.186381	1	1	Not Significant
LTB4R_PAPAN	6-month protocol vs 3-month protocol	0.184501	0.666667	0.955001	Not Significant
WAS_PAPAN	6-month protocol vs 3-month protocol	0.180521	1	1	Not Significant
PPP1CC_PIG	6-month protocol vs 3-month protocol	0.179674	0.666667	0.955001	Not Significant
CAPZA1_PAPAN	6-month protocol vs 3-month protocol	0.179601	0.666667	0.955001	Not Significant
LCP1_PAPAN	6-month protocol vs 3-month protocol	0.177319	0.833333	0.990959	Not Significant
CAPG_PAPAN	6-month protocol vs 3-month protocol	0.175817	0.666667	0.955001	Not Significant
HDLBP_PAPAN	6-month protocol vs 3-month protocol	0.175231	1	1	Not Significant
SPTB_PAPAN	6-month protocol vs 3-month protocol	0.172923	1	1	Not Significant
APIP_PAPAN	6-month protocol vs 3-month protocol	0.17166	0.833333	0.990959	Not Significant
GOLM1_PAPAN	6-month protocol vs 3-month protocol	0.171524	0.666667	0.955001	Not Significant
MB_PAPAN	6-month protocol vs 3-month protocol	0.171053	0.833333	0.990959	Not Significant
GP9_PAPAN	6-month protocol vs 3-month protocol	0.170122	0.666667	0.955001	Not Significant
ANTXR1_PAPAN	6-month protocol vs 3-month protocol	0.169204	1	1	Not Significant
DPYS_PAPAN	6-month protocol vs 3-month protocol	0.167776	1	1	Not Significant
MARCKSL1_PAPAN	6-month protocol vs 3-month protocol	0.166898	0.666667	0.955001	Not Significant
PDLIM1_PAPAN	6-month protocol vs 3-month protocol	0.16031	1	1	Not Significant
ADAMDEC1_PAPAN	6-month protocol vs 3-month protocol	0.159107	0.516667	0.946938	Not Significant
SCARB2_PAPAN	6-month protocol vs 3-month protocol	0.15888	0.666667	0.955001	Not Significant
AGRN_PAPAN	6-month protocol vs 3-month protocol	0.158626	0.833333	0.990959	Not Significant
BASP1_PAPAN	6-month protocol vs 3-month protocol	0.157955	0.666667	0.955001	Not Significant
CFH_PAPAN	6-month protocol vs 3-month protocol	0.156477	0.516667	0.946938	Not Significant
ST6GAL1_PAPAN	6-month protocol vs 3-month protocol	0.155927	0.666667	0.955001	Not Significant
KRT10_PAPAN	6-month protocol vs 3-month protocol	0.155926	0.666667	0.955001	Not Significant
TNXB_PIG	6-month protocol vs 3-month protocol	0.155048	0.516667	0.946938	Not Significant
S100P_PAPAN	6-month protocol vs 3-month protocol	0.154787	0.833333	0.990959	Not Significant
ITGA7_PAPAN	6-month protocol vs 3-month protocol	0.152047	0.383333	0.933674	Not Significant
MYO1G_PAPAN	6-month protocol vs 3-month protocol	0.150541	1	1	Not Significant
CLEC12A_PAPAN	6-month protocol vs 3-month protocol	0.148977	0.833333	0.990959	Not Significant
VWF_PAPAN	6-month protocol vs 3-month protocol	0.148523	0.833333	0.990959	Not Significant
SELL_PIG	6-month protocol vs 3-month protocol	0.146214	1	1	Not Significant
NPNT_PAPAN	6-month protocol vs 3-month protocol	0.145996	1	1	Not Significant
FSCN1_PAPAN	6-month protocol vs 3-month protocol	0.144078	0.833333	0.990959	Not Significant
CAPN5_PAPAN	6-month protocol vs 3-month protocol	0.14367	0.666667	0.955001	Not Significant
RPL5_PAPAN	6-month protocol vs 3-month protocol	0.142676	0.833333	0.990959	Not Significant
LOC106510200_PIG	6-month protocol vs 3-month protocol	0.141644	0.516667	0.946938	Not Significant
RPL10A_PIG	6-month protocol vs 3-month protocol	0.139317	0.833333	0.990959	Not Significant
RPN2_PAPAN	6-month protocol vs 3-month protocol	0.138597	0.516667	0.946938	Not Significant
SPRR1B_PAPAN	6-month protocol vs 3-month protocol	0.13773	1	1	Not Significant
AACS_PAPAN	6-month protocol vs 3-month protocol	0.136056	0.833333	0.990959	Not Significant
ESYT1_PAPAN	6-month protocol vs 3-month protocol	0.135926	0.833333	0.990959	Not Significant
HSPA5_PAPAN	6-month protocol vs 3-month protocol	0.135893	1	1	Not Significant
ADIPOQ_PAPAN	6-month protocol vs 3-month protocol	0.135104	0.666667	0.955001	Not Significant
VSIG8_PAPAN	6-month protocol vs 3-month protocol	0.134637	1	1	Not Significant
PRG2_PAPAN	6-month protocol vs 3-month protocol	0.134498	1	1	Not Significant
GALNT7_PAPAN	6-month protocol vs 3-month protocol	0.133176	0.833333	0.990959	Not Significant
HK3_PAPAN	6-month protocol vs 3-month protocol	0.13275	0.516667	0.946938	Not Significant
ITGA2B_PAPAN	6-month protocol vs 3-month protocol	0.131341	1	1	Not Significant
SPTBN1_PAPAN	6-month protocol vs 3-month protocol	0.130996	0.833333	0.990959	Not Significant
SQLE_PAPAN	6-month protocol vs 3-month protocol	0.130262	0.666667	0.955001	Not Significant
CMTM5_PAPAN	6-month protocol vs 3-month protocol	0.128465	0.666667	0.955001	Not Significant
VARS1_PIG	6-month protocol vs 3-month protocol	0.127603	0.833333	0.990959	Not Significant
SFTPB_PAPAN	6-month protocol vs 3-month protocol	0.127061	0.516667	0.946938	Not Significant
OIT3_PAPAN	6-month protocol vs 3-month protocol	0.127027	0.833333	0.990959	Not Significant
ITGA11_PAPAN	6-month protocol vs 3-month protocol	0.126764	0.833333	0.990959	Not Significant
CLU_PAPAN	6-month protocol vs 3-month protocol	0.12467	0.833333	0.990959	Not Significant
IL6R_PAPAN	6-month protocol vs 3-month protocol	0.124485	0.666667	0.955001	Not Significant
Paca-F_PAPAN	6-month protocol vs 3-month protocol	0.123273	1	1	Not Significant
ATP1B1_PAPAN	6-month protocol vs 3-month protocol	0.121736	1	1	Not Significant
F12_PAPAN	6-month protocol vs 3-month protocol	0.121377	0.516667	0.946938	Not Significant
ARF5_PIG	6-month protocol vs 3-month protocol	0.119643	0.833333	0.990959	Not Significant
ITIH4_PAPAN	6-month protocol vs 3-month protocol	0.119625	1	1	Not Significant
CD59_PAPAN	6-month protocol vs 3-month protocol	0.119465	0.833333	0.990959	Not Significant
COL6A3_PAPAN	6-month protocol vs 3-month protocol	0.119169	0.516667	0.946938	Not Significant
SEPTIN2_PAPAN	6-month protocol vs 3-month protocol	0.11719	0.833333	0.990959	Not Significant
CCN1_PAPAN	6-month protocol vs 3-month protocol	0.116235	1	1	Not Significant
EVPL_PAPAN	6-month protocol vs 3-month protocol	0.114702	1	1	Not Significant
C1R_PAPAN	6-month protocol vs 3-month protocol	0.114382	0.833333	0.990959	Not Significant
MYH10_PAPAN	6-month protocol vs 3-month protocol	0.114263	0.516667	0.946938	Not Significant
TPM4_PIG	6-month protocol vs 3-month protocol	0.111759	0.666667	0.955001	Not Significant
PSMC6_PIG	6-month protocol vs 3-month protocol	0.110904	1	1	Not Significant
KRT32_PAPAN	6-month protocol vs 3-month protocol	0.110851	0.833333	0.990959	Not Significant
TALDO1_PAPAN	6-month protocol vs 3-month protocol	0.110165	0.833333	0.990959	Not Significant
DNASE1L3_PAPAN	6-month protocol vs 3-month protocol	0.109478	0.666667	0.955001	Not Significant
ICAM1_PAPAN	6-month protocol vs 3-month protocol	0.108818	1	1	Not Significant
NSFL1C_PAPAN	6-month protocol vs 3-month protocol	0.108566	0.666667	0.955001	Not Significant
NID1_PAPAN	6-month protocol vs 3-month protocol	0.108453	1	1	Not Significant
SEMA4G_PAPAN	6-month protocol vs 3-month protocol	0.108418	1	1	Not Significant
GAN_PAPAN	6-month protocol vs 3-month protocol	0.10802	0.833333	0.990959	Not Significant
HUWE1_PAPAN	6-month protocol vs 3-month protocol	0.106907	0.666667	0.955001	Not Significant
VAT1_PAPAN	6-month protocol vs 3-month protocol	0.105438	1	1	Not Significant
SFRP1_PIG	6-month protocol vs 3-month protocol	0.104669	1	1	Not Significant
IFITM1_PAPAN	6-month protocol vs 3-month protocol	0.102291	0.833333	0.990959	Not Significant
SDR9C7_PIG	6-month protocol vs 3-month protocol	0.101712	0.833333	0.990959	Not Significant
VASN_PAPAN	6-month protocol vs 3-month protocol	0.0995952	1	1	Not Significant
CFI_PAPAN	6-month protocol vs 3-month protocol	0.0994497	0.833333	0.990959	Not Significant
CMAS_PAPAN	6-month protocol vs 3-month protocol	0.0991865	1	1	Not Significant
CDK11_PIG	6-month protocol vs 3-month protocol	0.0987582	1	1	Not Significant
SLC1A5_PAPAN	6-month protocol vs 3-month protocol	0.0985604	0.666667	0.955001	Not Significant
IGDCC4_PAPAN	6-month protocol vs 3-month protocol	0.0978479	0.833333	0.990959	Not Significant
THSD7A_PAPAN	6-month protocol vs 3-month protocol	0.097353	0.666667	0.955001	Not Significant
KYNU_PAPAN	6-month protocol vs 3-month protocol	0.0951743	0.666667	0.955001	Not Significant
CLEC3B_PIG	6-month protocol vs 3-month protocol	0.0949919	0.833333	0.990959	Not Significant
APEX1_PAPAN	6-month protocol vs 3-month protocol	0.0937468	1	1	Not Significant
HPX_PAPAN	6-month protocol vs 3-month protocol	0.0935782	1	1	Not Significant
TRIM25_PAPAN	6-month protocol vs 3-month protocol	0.0934594	1	1	Not Significant
C16orf54_PAPAN	6-month protocol vs 3-month protocol	0.093325	1	1	Not Significant
AP2A2_PAPAN	6-month protocol vs 3-month protocol	0.0932537	0.833333	0.990959	Not Significant
ERAP1_PAPAN	6-month protocol vs 3-month protocol	0.0920481	1	1	Not Significant
ADM_PAPAN	6-month protocol vs 3-month protocol	0.091777	0.666667	0.955001	Not Significant
TMEM132C_PAPAN	6-month protocol vs 3-month protocol	0.0914424	0.833333	0.990959	Not Significant
FLNB_PIG	6-month protocol vs 3-month protocol	0.0909898	0.833333	0.990959	Not Significant
STAP2_PIG	6-month protocol vs 3-month protocol	0.089946	0.833333	0.990959	Not Significant
TFPI_PAPAN	6-month protocol vs 3-month protocol	0.0887819	1	1	Not Significant
NEO1_PAPAN	6-month protocol vs 3-month protocol	0.0884661	0.833333	0.990959	Not Significant
ALDH2_PAPAN	6-month protocol vs 3-month protocol	0.0881364	0.833333	0.990959	Not Significant
PROS1_PIG	6-month protocol vs 3-month protocol	0.0870291	1	1	Not Significant
MAT2B_PAPAN	6-month protocol vs 3-month protocol	0.0847825	0.666667	0.955001	Not Significant
PTPN12_PAPAN	6-month protocol vs 3-month protocol	0.0847191	0.833333	0.990959	Not Significant
COLGALT1_PAPAN	6-month protocol vs 3-month protocol	0.0832971	1	1	Not Significant
RDH11_PAPAN	6-month protocol vs 3-month protocol	0.0830945	1	1	Not Significant
SLC25A5_PIG	6-month protocol vs 3-month protocol	0.0830499	1	1	Not Significant
ACAA2_PAPAN	6-month protocol vs 3-month protocol	0.0819136	0.833333	0.990959	Not Significant
PGD_PAPAN	6-month protocol vs 3-month protocol	0.0811077	1	1	Not Significant
HBG2_1_PAPAN	6-month protocol vs 3-month protocol	0.08106	1	1	Not Significant
CALML3_PAPAN	6-month protocol vs 3-month protocol	0.0779904	0.833333	0.990959	Not Significant
CALR_PAPAN	6-month protocol vs 3-month protocol	0.0737311	0.666667	0.955001	Not Significant
CCAR1_PIG	6-month protocol vs 3-month protocol	0.07308	1	1	Not Significant
CAMP_PAPAN	6-month protocol vs 3-month protocol	0.0723067	1	1	Not Significant
MVD_PAPAN	6-month protocol vs 3-month protocol	0.0718644	0.666667	0.955001	Not Significant
TPR_PAPAN	6-month protocol vs 3-month protocol	0.0713931	0.666667	0.955001	Not Significant
PDGFD_PAPAN	6-month protocol vs 3-month protocol	0.0712715	0.666667	0.955001	Not Significant
CRISPLD2_PAPAN	6-month protocol vs 3-month protocol	0.0704107	1	1	Not Significant
PLIN4_PAPAN	6-month protocol vs 3-month protocol	0.0697951	0.666667	0.955001	Not Significant
PIGR_PAPAN	6-month protocol vs 3-month protocol	0.0695625	1	1	Not Significant
WDR44_PAPAN	6-month protocol vs 3-month protocol	0.0680523	1	1	Not Significant
RASAL3_PAPAN	6-month protocol vs 3-month protocol	0.0679374	1	1	Not Significant
ACSL1_PAPAN	6-month protocol vs 3-month protocol	0.0675577	0.833333	0.990959	Not Significant
MACF1_PIG	6-month protocol vs 3-month protocol	0.0672826	1	1	Not Significant
HBA_PAPAN	6-month protocol vs 3-month protocol	0.0665548	0.833333	0.990959	Not Significant
F9_PAPAN	6-month protocol vs 3-month protocol	0.0659963	0.833333	0.990959	Not Significant
FHL1_PIG	6-month protocol vs 3-month protocol	0.0648826	1	1	Not Significant
PTPN23_PAPAN	6-month protocol vs 3-month protocol	0.0646056	1	1	Not Significant
C1R_PIG	6-month protocol vs 3-month protocol	0.0643487	1	1	Not Significant
PAICS_PAPAN	6-month protocol vs 3-month protocol	0.0643031	0.666667	0.955001	Not Significant
RPL27A_PIG	6-month protocol vs 3-month protocol	0.063967	0.833333	0.990959	Not Significant
TNFSF10_PAPAN	6-month protocol vs 3-month protocol	0.0638181	0.666667	0.955001	Not Significant
CTH_PAPAN	6-month protocol vs 3-month protocol	0.0637903	1	1	Not Significant
COL6A2_PAPAN	6-month protocol vs 3-month protocol	0.0632823	0.516667	0.946938	Not Significant
LGALS3_PAPAN	6-month protocol vs 3-month protocol	0.0619576	0.833333	0.990959	Not Significant
PEX11B_PIG	6-month protocol vs 3-month protocol	0.0609432	0.516667	0.946938	Not Significant
SERPINE1_PAPAN	6-month protocol vs 3-month protocol	0.0608077	1	1	Not Significant
OAT_PAPAN	6-month protocol vs 3-month protocol	0.0576573	1	1	Not Significant
BPI_PAPAN	6-month protocol vs 3-month protocol	0.0574268	1	1	Not Significant
KPRP_PAPAN	6-month protocol vs 3-month protocol	0.0565513	1	1	Not Significant
PECAM1_PAPAN	6-month protocol vs 3-month protocol	0.0533483	0.666667	0.955001	Not Significant
ABCC1_PAPAN	6-month protocol vs 3-month protocol	0.0524384	1	1	Not Significant
PDCD11_PAPAN	6-month protocol vs 3-month protocol	0.0505777	0.833333	0.990959	Not Significant
CTSH_PAPAN	6-month protocol vs 3-month protocol	0.0505707	0.833333	0.990959	Not Significant
IFI16_PAPAN	6-month protocol vs 3-month protocol	0.0504263	1	1	Not Significant
FNTA_PAPAN	6-month protocol vs 3-month protocol	0.0501415	0.833333	0.990959	Not Significant
GBA1_PAPAN	6-month protocol vs 3-month protocol	0.0462786	1	1	Not Significant
KRT79_PAPAN	6-month protocol vs 3-month protocol	0.0454573	0.833333	0.990959	Not Significant
PEBP1_PAPAN	6-month protocol vs 3-month protocol	0.0444724	0.516667	0.946938	Not Significant
ACO2_PAPAN	6-month protocol vs 3-month protocol	0.0436905	0.833333	0.990959	Not Significant
CCN5_PAPAN	6-month protocol vs 3-month protocol	0.039255	1	1	Not Significant
TBC1D15_PAPAN	6-month protocol vs 3-month protocol	0.0381776	1	1	Not Significant
PKLR_PAPAN	6-month protocol vs 3-month protocol	0.0377675	1	1	Not Significant
TGFB1_PAPAN	6-month protocol vs 3-month protocol	0.036576	0.516667	0.946938	Not Significant
APOB_PAPAN	6-month protocol vs 3-month protocol	0.0365416	1	1	Not Significant
LOXL1_PAPAN	6-month protocol vs 3-month protocol	0.0363128	0.833333	0.990959	Not Significant
C4A_PIG	6-month protocol vs 3-month protocol	0.0353639	0.833333	0.990959	Not Significant
A1BG_PIG	6-month protocol vs 3-month protocol	0.0340618	1	1	Not Significant
SERPINB2_PIG	6-month protocol vs 3-month protocol	0.0333986	0.833333	0.990959	Not Significant
CFB_PIG	6-month protocol vs 3-month protocol	0.0326558	1	1	Not Significant
ICAM3_PAPAN	6-month protocol vs 3-month protocol	0.0324591	1	1	Not Significant
GATM_PAPAN	6-month protocol vs 3-month protocol	0.0316212	1	1	Not Significant
SSBP1_PAPAN	6-month protocol vs 3-month protocol	0.030992	1	1	Not Significant
CTNND1_PAPAN	6-month protocol vs 3-month protocol	0.0294272	1	1	Not Significant
IGFBPL1_PAPAN	6-month protocol vs 3-month protocol	0.0271549	1	1	Not Significant
VCAM1_PAPAN	6-month protocol vs 3-month protocol	0.0266686	0.833333	0.990959	Not Significant
MBL2_PAPAN	6-month protocol vs 3-month protocol	0.0266685	0.666667	0.955001	Not Significant
APOD_PIG	6-month protocol vs 3-month protocol	0.026215	0.833333	0.990959	Not Significant
HIP1R_PAPAN	6-month protocol vs 3-month protocol	0.0259536	1	1	Not Significant
HADH_PAPAN	6-month protocol vs 3-month protocol	0.0257315	1	1	Not Significant
CARS1_PAPAN	6-month protocol vs 3-month protocol	0.0242902	1	1	Not Significant
FABP1_PAPAN	6-month protocol vs 3-month protocol	0.0213997	0.833333	0.990959	Not Significant
CCDC80_PAPAN	6-month protocol vs 3-month protocol	0.0209634	1	1	Not Significant
LOC100522401_PIG	6-month protocol vs 3-month protocol	0.020682	1	1	Not Significant
ITIH1_PAPAN	6-month protocol vs 3-month protocol	0.0198278	1	1	Not Significant
TINAGL1_PAPAN	6-month protocol vs 3-month protocol	0.0198	0.833333	0.990959	Not Significant
EIF4G1_PAPAN	6-month protocol vs 3-month protocol	0.018099	0.666667	0.955001	Not Significant
RAB8A_PIG	6-month protocol vs 3-month protocol	0.0180917	0.833333	0.990959	Not Significant
CAPN3_PAPAN	6-month protocol vs 3-month protocol	0.0176282	0.833333	0.990959	Not Significant
CYP2A19_PIG	6-month protocol vs 3-month protocol	0.0159344	1	1	Not Significant
FGA_PIG	6-month protocol vs 3-month protocol	0.0152856	0.516667	0.946938	Not Significant
FGG_PAPAN	6-month protocol vs 3-month protocol	0.0139623	0.833333	0.990959	Not Significant
ANKRD2_PAPAN	6-month protocol vs 3-month protocol	0.0133738	1	1	Not Significant
ENPP2_PAPAN	6-month protocol vs 3-month protocol	0.0132006	0.833333	0.990959	Not Significant
IQGAP2_PAPAN	6-month protocol vs 3-month protocol	0.0128875	1	1	Not Significant
FGB_PIG	6-month protocol vs 3-month protocol	0.012798	0.833333	0.990959	Not Significant
SERPING1_PAPAN	6-month protocol vs 3-month protocol	0.0127466	1	1	Not Significant
PAK2_PAPAN	6-month protocol vs 3-month protocol	0.0126346	0.833333	0.990959	Not Significant
PNP_PAPAN	6-month protocol vs 3-month protocol	0.0122883	0.833333	0.990959	Not Significant
CP_PAPAN	6-month protocol vs 3-month protocol	0.0119073	1	1	Not Significant
SHMT2_PAPAN	6-month protocol vs 3-month protocol	0.0116117	1	1	Not Significant
SDHA_PIG	6-month protocol vs 3-month protocol	0.0110076	0.833333	0.990959	Not Significant
ECM1_PAPAN	6-month protocol vs 3-month protocol	0.0104974	0.833333	0.990959	Not Significant
SLC44A1_PAPAN	6-month protocol vs 3-month protocol	0.0103267	1	1	Not Significant
VTN_PAPAN	6-month protocol vs 3-month protocol	0.00934593	0.833333	0.990959	Not Significant
NAGK_PAPAN	6-month protocol vs 3-month protocol	0.00901138	1	1	Not Significant
MCF2L_PAPAN	6-month protocol vs 3-month protocol	0.00811338	0.516667	0.946938	Not Significant
CGN_PAPAN	6-month protocol vs 3-month protocol	0.00508807	1	1	Not Significant
ACADVL_PAPAN	6-month protocol vs 3-month protocol	0.00466236	1	1	Not Significant
SSB_PAPAN	6-month protocol vs 3-month protocol	0.00399541	0.666667	0.955001	Not Significant
DOK3_PAPAN	6-month protocol vs 3-month protocol	0.00323201	0.833333	0.990959	Not Significant
CD82_PAPAN	6-month protocol vs 3-month protocol	0.00315962	1	1	Not Significant
PCSK9_PAPAN	6-month protocol vs 3-month protocol	0.00306146	1	1	Not Significant
TSPAN32_PAPAN	6-month protocol vs 3-month protocol	0.00304478	1	1	Not Significant
S100A16_PAPAN	6-month protocol vs 3-month protocol	0.00290197	1	1	Not Significant
GBE1_PAPAN	6-month protocol vs 3-month protocol	0.00204895	1	1	Not Significant
CR1L_PAPAN	6-month protocol vs 3-month protocol	0.0017103	0.516667	0.946938	Not Significant
IDH2_PAPAN	6-month protocol vs 3-month protocol	0.000947024	1	1	Not Significant
PRXL2A_PAPAN	6-month protocol vs 3-month protocol	0.000364344	0.833333	0.990959	Not Significant
C8B_PAPAN	6-month protocol vs 3-month protocol	-0.000252682	1	1	Not Significant
COPA_PAPAN	6-month protocol vs 3-month protocol	-0.00028411	1	1	Not Significant
ERAP2_PAPAN	6-month protocol vs 3-month protocol	-0.000350611	0.833333	0.990959	Not Significant
CYP4V2_PAPAN	6-month protocol vs 3-month protocol	-0.000512414	0.833333	0.990959	Not Significant
NIBAN2_PAPAN	6-month protocol vs 3-month protocol	-0.00183946	1	1	Not Significant
ETFA_PAPAN	6-month protocol vs 3-month protocol	-0.0018679	0.666667	0.955001	Not Significant
DSP_PAPAN	6-month protocol vs 3-month protocol	-0.00317492	1	1	Not Significant
RRM1_PAPAN	6-month protocol vs 3-month protocol	-0.003628	1	1	Not Significant
CHGA_PAPAN	6-month protocol vs 3-month protocol	-0.00446055	1	1	Not Significant
SERPINA1_PIG	6-month protocol vs 3-month protocol	-0.00447207	1	1	Not Significant
MADD_PIG	6-month protocol vs 3-month protocol	-0.00460344	1	1	Not Significant
ALDH7A1_PAPAN	6-month protocol vs 3-month protocol	-0.00598364	1	1	Not Significant
CLIC3_PAPAN	6-month protocol vs 3-month protocol	-0.00694281	1	1	Not Significant
EPB41L2_PAPAN	6-month protocol vs 3-month protocol	-0.00794194	0.666667	0.955001	Not Significant
FTH1_PAPAN	6-month protocol vs 3-month protocol	-0.00899454	0.833333	0.990959	Not Significant
CAST_PAPAN	6-month protocol vs 3-month protocol	-0.0104925	1	1	Not Significant
C1RL_PAPAN	6-month protocol vs 3-month protocol	-0.0106045	1	1	Not Significant
ITIH1_PIG	6-month protocol vs 3-month protocol	-0.0106051	0.833333	0.990959	Not Significant
MYO1E_PIG	6-month protocol vs 3-month protocol	-0.0106577	1	1	Not Significant
CDC42BPB_PAPAN	6-month protocol vs 3-month protocol	-0.0122379	0.666667	0.955001	Not Significant
RPS17_PIG	6-month protocol vs 3-month protocol	-0.0133359	1	1	Not Significant
ANGPTL4_PAPAN	6-month protocol vs 3-month protocol	-0.0139084	0.833333	0.990959	Not Significant
LOC100517145_PIG	6-month protocol vs 3-month protocol	-0.0140555	0.383333	0.933674	Not Significant
NRDC_PAPAN	6-month protocol vs 3-month protocol	-0.0149132	0.833333	0.990959	Not Significant
BTN2A1_PAPAN	6-month protocol vs 3-month protocol	-0.01688	0.516667	0.946938	Not Significant
LRG1_PAPAN	6-month protocol vs 3-month protocol	-0.0194746	1	1	Not Significant
RPS13_PIG	6-month protocol vs 3-month protocol	-0.0195017	0.833333	0.990959	Not Significant
PALMD_PAPAN	6-month protocol vs 3-month protocol	-0.0203037	1	1	Not Significant
VMO1_PAPAN	6-month protocol vs 3-month protocol	-0.022584	1	1	Not Significant
DSG1_PAPAN	6-month protocol vs 3-month protocol	-0.0240176	0.833333	0.990959	Not Significant
SEMA4A_PAPAN	6-month protocol vs 3-month protocol	-0.0243717	1	1	Not Significant
IGFBP7_PAPAN	6-month protocol vs 3-month protocol	-0.0258937	0.833333	0.990959	Not Significant
RPS10_PIG	6-month protocol vs 3-month protocol	-0.0273068	0.833333	0.990959	Not Significant
GFUS_PAPAN	6-month protocol vs 3-month protocol	-0.027366	0.833333	0.990959	Not Significant
ACADSB_PAPAN	6-month protocol vs 3-month protocol	-0.0283363	1	1	Not Significant
HAPLN3_PAPAN	6-month protocol vs 3-month protocol	-0.0290003	1	1	Not Significant
IPO5_PAPAN	6-month protocol vs 3-month protocol	-0.0291147	1	1	Not Significant
PLA1A_PAPAN	6-month protocol vs 3-month protocol	-0.0294311	1	1	Not Significant
CCT6A_PAPAN	6-month protocol vs 3-month protocol	-0.0294495	1	1	Not Significant
KLHDC4_PAPAN	6-month protocol vs 3-month protocol	-0.0298287	0.833333	0.990959	Not Significant
F8_PAPAN	6-month protocol vs 3-month protocol	-0.0299799	0.666667	0.955001	Not Significant
MPI_PAPAN	6-month protocol vs 3-month protocol	-0.0300818	0.833333	0.990959	Not Significant
SKAP2_PAPAN	6-month protocol vs 3-month protocol	-0.031293	1	1	Not Significant
TNC_PAPAN	6-month protocol vs 3-month protocol	-0.0315589	0.666667	0.955001	Not Significant
CWH43_PAPAN	6-month protocol vs 3-month protocol	-0.032111	1	1	Not Significant
SOD2_PAPAN	6-month protocol vs 3-month protocol	-0.0333469	0.833333	0.990959	Not Significant
ORM1_PAPAN	6-month protocol vs 3-month protocol	-0.0343072	0.833333	0.990959	Not Significant
P4HA1_PAPAN	6-month protocol vs 3-month protocol	-0.0350213	1	1	Not Significant
GMPR_PAPAN	6-month protocol vs 3-month protocol	-0.0352577	1	1	Not Significant
COL5A3_PAPAN	6-month protocol vs 3-month protocol	-0.0355571	1	1	Not Significant
CUL2_PAPAN	6-month protocol vs 3-month protocol	-0.038298	1	1	Not Significant
SERPINB12_PAPAN	6-month protocol vs 3-month protocol	-0.0385726	1	1	Not Significant
CTSV_PAPAN	6-month protocol vs 3-month protocol	-0.0398879	1	1	Not Significant
EHD3_PAPAN	6-month protocol vs 3-month protocol	-0.0404711	1	1	Not Significant
PEPD_PAPAN	6-month protocol vs 3-month protocol	-0.041204	0.383333	0.933674	Not Significant
PSMB9_PAPAN	6-month protocol vs 3-month protocol	-0.0413367	1	1	Not Significant
SHPK_PAPAN	6-month protocol vs 3-month protocol	-0.0423062	1	1	Not Significant
HDDC2_PAPAN	6-month protocol vs 3-month protocol	-0.042579	1	1	Not Significant
APOB_PIG	6-month protocol vs 3-month protocol	-0.042809	0.833333	0.990959	Not Significant
ALDOA_PIG	6-month protocol vs 3-month protocol	-0.0431477	1	1	Not Significant
COPS3_PIG	6-month protocol vs 3-month protocol	-0.0451104	1	1	Not Significant
GIMAP4_PAPAN	6-month protocol vs 3-month protocol	-0.0451576	0.666667	0.955001	Not Significant
FGD3_PAPAN	6-month protocol vs 3-month protocol	-0.0471999	0.516667	0.946938	Not Significant
SDR16C5_PAPAN	6-month protocol vs 3-month protocol	-0.0472335	0.833333	0.990959	Not Significant
ARHGEF1_PAPAN	6-month protocol vs 3-month protocol	-0.0474437	1	1	Not Significant
CTSL_PAPAN	6-month protocol vs 3-month protocol	-0.04757	0.833333	0.990959	Not Significant
HSPB1_PIG	6-month protocol vs 3-month protocol	-0.0479302	1	1	Not Significant
SLC22A1_PAPAN	6-month protocol vs 3-month protocol	-0.0483644	1	1	Not Significant
CAMK2D_PIG	6-month protocol vs 3-month protocol	-0.050454	1	1	Not Significant
BBOX1_PAPAN	6-month protocol vs 3-month protocol	-0.0521522	1	1	Not Significant
HLA-DPA1_PAPAN	6-month protocol vs 3-month protocol	-0.0521922	0.383333	0.933674	Not Significant
IL1RAP_PAPAN	6-month protocol vs 3-month protocol	-0.0537819	1	1	Not Significant
EEA1_PAPAN	6-month protocol vs 3-month protocol	-0.0545376	0.833333	0.990959	Not Significant
NHERF1_PAPAN	6-month protocol vs 3-month protocol	-0.0552968	1	1	Not Significant
TSPAN33_PAPAN	6-month protocol vs 3-month protocol	-0.0556415	1	1	Not Significant
PLGRKT_PAPAN	6-month protocol vs 3-month protocol	-0.056218	1	1	Not Significant
NUMA1_PIG	6-month protocol vs 3-month protocol	-0.0628312	1	1	Not Significant
EFEMP1_PAPAN	6-month protocol vs 3-month protocol	-0.0647196	1	1	Not Significant
PGM3_PAPAN	6-month protocol vs 3-month protocol	-0.0649484	0.833333	0.990959	Not Significant
LTA4H_PAPAN	6-month protocol vs 3-month protocol	-0.0652832	0.666667	0.955001	Not Significant
FCGR1A_PAPAN	6-month protocol vs 3-month protocol	-0.0654893	0.383333	0.933674	Not Significant
A2M_PIG	6-month protocol vs 3-month protocol	-0.0655838	0.516667	0.946938	Not Significant
GCLC_PAPAN	6-month protocol vs 3-month protocol	-0.0668656	1	1	Not Significant
AHCY_PAPAN	6-month protocol vs 3-month protocol	-0.0675841	0.666667	0.955001	Not Significant
GSS_PAPAN	6-month protocol vs 3-month protocol	-0.0679598	0.833333	0.990959	Not Significant
GSTM2_PAPAN	6-month protocol vs 3-month protocol	-0.0683979	0.833333	0.990959	Not Significant
LTBP1_PAPAN	6-month protocol vs 3-month protocol	-0.0692375	0.833333	0.990959	Not Significant
CD99_PAPAN	6-month protocol vs 3-month protocol	-0.0695224	0.666667	0.955001	Not Significant
SELP_PAPAN	6-month protocol vs 3-month protocol	-0.0715258	0.666667	0.955001	Not Significant
C2_PIG	6-month protocol vs 3-month protocol	-0.0718385	1	1	Not Significant
FGB_PAPAN	6-month protocol vs 3-month protocol	-0.0719428	0.833333	0.990959	Not Significant
APOL2_PAPAN	6-month protocol vs 3-month protocol	-0.0722471	1	1	Not Significant
SQSTM1_PAPAN	6-month protocol vs 3-month protocol	-0.0728418	0.833333	0.990959	Not Significant
RPL7_PIG	6-month protocol vs 3-month protocol	-0.0737581	0.833333	0.990959	Not Significant
PARVB_PAPAN	6-month protocol vs 3-month protocol	-0.073891	0.833333	0.990959	Not Significant
LYN_PAPAN	6-month protocol vs 3-month protocol	-0.0740055	0.833333	0.990959	Not Significant
APOA4_PIG	6-month protocol vs 3-month protocol	-0.0743116	1	1	Not Significant
GOT1_PIG	6-month protocol vs 3-month protocol	-0.0744686	0.833333	0.990959	Not Significant
CYP17A1_PAPAN	6-month protocol vs 3-month protocol	-0.0745946	1	1	Not Significant
SLC29A1_PAPAN	6-month protocol vs 3-month protocol	-0.0756311	0.833333	0.990959	Not Significant
IL1R2_PAPAN	6-month protocol vs 3-month protocol	-0.0759084	1	1	Not Significant
HNRNPL_PAPAN	6-month protocol vs 3-month protocol	-0.0773639	1	1	Not Significant
ADHFE1_PAPAN	6-month protocol vs 3-month protocol	-0.0778702	1	1	Not Significant
MPST_PIG	6-month protocol vs 3-month protocol	-0.0796484	1	1	Not Significant
CLIP1_PAPAN	6-month protocol vs 3-month protocol	-0.0799548	1	1	Not Significant
CLEC5A_PAPAN	6-month protocol vs 3-month protocol	-0.0803391	0.833333	0.990959	Not Significant
NT5DC1_PAPAN	6-month protocol vs 3-month protocol	-0.0813983	0.516667	0.946938	Not Significant
LMNB1_PAPAN	6-month protocol vs 3-month protocol	-0.0814379	0.666667	0.955001	Not Significant
CFD_PIG	6-month protocol vs 3-month protocol	-0.0816879	1	1	Not Significant
MYO5B_PAPAN	6-month protocol vs 3-month protocol	-0.0829672	1	1	Not Significant
FKBP4_PAPAN	6-month protocol vs 3-month protocol	-0.0851644	0.516667	0.946938	Not Significant
ACTN4_PAPAN	6-month protocol vs 3-month protocol	-0.0862095	1	1	Not Significant
CMBL_PAPAN	6-month protocol vs 3-month protocol	-0.08668	0.666667	0.955001	Not Significant
TIE1_PAPAN	6-month protocol vs 3-month protocol	-0.086801	0.833333	0.990959	Not Significant
GLOD4_PAPAN	6-month protocol vs 3-month protocol	-0.0873543	0.833333	0.990959	Not Significant
GSTP1_PAPAN	6-month protocol vs 3-month protocol	-0.0883193	1	1	Not Significant
UBAP2L_PIG	6-month protocol vs 3-month protocol	-0.0884547	0.833333	0.990959	Not Significant
AMDHD2_PAPAN	6-month protocol vs 3-month protocol	-0.0904369	0.383333	0.933674	Not Significant
CORO7_PAPAN	6-month protocol vs 3-month protocol	-0.0919991	0.516667	0.946938	Not Significant
CKAP5_PAPAN	6-month protocol vs 3-month protocol	-0.0923829	1	1	Not Significant
ITGA4_PAPAN	6-month protocol vs 3-month protocol	-0.0932993	0.666667	0.955001	Not Significant
ITGB3_PAPAN	6-month protocol vs 3-month protocol	-0.0934575	1	1	Not Significant
PGLYRP1_PAPAN	6-month protocol vs 3-month protocol	-0.093801	1	1	Not Significant
ANXA8_PIG	6-month protocol vs 3-month protocol	-0.0940548	0.666667	0.955001	Not Significant
CETP_PAPAN	6-month protocol vs 3-month protocol	-0.0949545	0.666667	0.955001	Not Significant
TTLL12_PAPAN	6-month protocol vs 3-month protocol	-0.0959186	1	1	Not Significant
NEB_PAPAN	6-month protocol vs 3-month protocol	-0.0966154	1	1	Not Significant
G6PD_PIG	6-month protocol vs 3-month protocol	-0.096714	0.833333	0.990959	Not Significant
TOR4A_PAPAN	6-month protocol vs 3-month protocol	-0.0967464	1	1	Not Significant
RBM8A_PIG	6-month protocol vs 3-month protocol	-0.0968219	0.666667	0.955001	Not Significant
CYBB_PAPAN	6-month protocol vs 3-month protocol	-0.0974812	1	1	Not Significant
C8A_PAPAN	6-month protocol vs 3-month protocol	-0.0976106	1	1	Not Significant
COX7A2L_PAPAN	6-month protocol vs 3-month protocol	-0.0981114	0.833333	0.990959	Not Significant
ARMT1_PAPAN	6-month protocol vs 3-month protocol	-0.0984922	0.833333	0.990959	Not Significant
GSR_PAPAN	6-month protocol vs 3-month protocol	-0.0985901	0.666667	0.955001	Not Significant
SPP1_PAPAN	6-month protocol vs 3-month protocol	-0.10087	0.833333	0.990959	Not Significant
EVI2B_PAPAN	6-month protocol vs 3-month protocol	-0.101062	0.666667	0.955001	Not Significant
AMBP_PAPAN	6-month protocol vs 3-month protocol	-0.102538	0.383333	0.933674	Not Significant
IFIT3_PAPAN	6-month protocol vs 3-month protocol	-0.102756	0.833333	0.990959	Not Significant
NRGN_PAPAN	6-month protocol vs 3-month protocol	-0.103839	1	1	Not Significant
ERMAP_PAPAN	6-month protocol vs 3-month protocol	-0.103895	0.666667	0.955001	Not Significant
KRT8_PIG	6-month protocol vs 3-month protocol	-0.10439	1	1	Not Significant
LSS_PAPAN	6-month protocol vs 3-month protocol	-0.10572	0.516667	0.946938	Not Significant
GGCT_PAPAN	6-month protocol vs 3-month protocol	-0.105942	0.516667	0.946938	Not Significant
ACADS_PAPAN	6-month protocol vs 3-month protocol	-0.107843	0.833333	0.990959	Not Significant
TFRC_PAPAN	6-month protocol vs 3-month protocol	-0.108396	1	1	Not Significant
PTPRB_PAPAN	6-month protocol vs 3-month protocol	-0.108648	0.383333	0.933674	Not Significant
HNRNPA3_PIG	6-month protocol vs 3-month protocol	-0.10941	1	1	Not Significant
ICAM4_PAPAN	6-month protocol vs 3-month protocol	-0.109456	0.383333	0.933674	Not Significant
KRAS_PIG	6-month protocol vs 3-month protocol	-0.109792	1	1	Not Significant
CHIT1_PAPAN	6-month protocol vs 3-month protocol	-0.109994	1	1	Not Significant
ARHGAP45_PIG	6-month protocol vs 3-month protocol	-0.110552	0.833333	0.990959	Not Significant
C3_PIG	6-month protocol vs 3-month protocol	-0.11067	0.666667	0.955001	Not Significant
POR_PAPAN	6-month protocol vs 3-month protocol	-0.111368	1	1	Not Significant
LAMA3_PAPAN	6-month protocol vs 3-month protocol	-0.111614	0.666667	0.955001	Not Significant
TJP2_PAPAN	6-month protocol vs 3-month protocol	-0.111694	1	1	Not Significant
CAT_PAPAN	6-month protocol vs 3-month protocol	-0.11237	0.833333	0.990959	Not Significant
CYCS_PAPAN	6-month protocol vs 3-month protocol	-0.112403	1	1	Not Significant
PPID_PIG	6-month protocol vs 3-month protocol	-0.112935	0.383333	0.933674	Not Significant
PTGS1_PAPAN	6-month protocol vs 3-month protocol	-0.113191	0.833333	0.990959	Not Significant
CD163_PAPAN	6-month protocol vs 3-month protocol	-0.11354	0.833333	0.990959	Not Significant
PEBP4_PAPAN	6-month protocol vs 3-month protocol	-0.113559	1	1	Not Significant
P4HB_PAPAN	6-month protocol vs 3-month protocol	-0.11373	0.666667	0.955001	Not Significant
UBE2O_PAPAN	6-month protocol vs 3-month protocol	-0.114543	0.833333	0.990959	Not Significant
OAS3_PAPAN	6-month protocol vs 3-month protocol	-0.115661	1	1	Not Significant
HRG_PAPAN	6-month protocol vs 3-month protocol	-0.116661	0.666667	0.955001	Not Significant
DBNL_PAPAN	6-month protocol vs 3-month protocol	-0.116772	0.833333	0.990959	Not Significant
SEMA7A_PAPAN	6-month protocol vs 3-month protocol	-0.118215	0.266667	0.906667	Not Significant
ITIH5_PAPAN	6-month protocol vs 3-month protocol	-0.118473	1	1	Not Significant
EHHADH_PAPAN	6-month protocol vs 3-month protocol	-0.119309	0.833333	0.990959	Not Significant
PECR_PAPAN	6-month protocol vs 3-month protocol	-0.12065	0.666667	0.955001	Not Significant
SERPINA1_PAPAN	6-month protocol vs 3-month protocol	-0.122746	0.666667	0.955001	Not Significant
RO60_PAPAN	6-month protocol vs 3-month protocol	-0.124054	0.833333	0.990959	Not Significant
GOT2_PIG	6-month protocol vs 3-month protocol	-0.12418	0.666667	0.955001	Not Significant
ART4_PAPAN	6-month protocol vs 3-month protocol	-0.12427	0.833333	0.990959	Not Significant
MYOF_PAPAN	6-month protocol vs 3-month protocol	-0.125469	1	1	Not Significant
MYO9B_PAPAN	6-month protocol vs 3-month protocol	-0.126188	0.666667	0.955001	Not Significant
CARS2_PAPAN	6-month protocol vs 3-month protocol	-0.126641	1	1	Not Significant
UMPS_PAPAN	6-month protocol vs 3-month protocol	-0.129743	0.833333	0.990959	Not Significant
TUT7_PAPAN	6-month protocol vs 3-month protocol	-0.130357	0.666667	0.955001	Not Significant
PDHA1_PIG	6-month protocol vs 3-month protocol	-0.133027	0.833333	0.990959	Not Significant
CFI_PIG	6-month protocol vs 3-month protocol	-0.134433	1	1	Not Significant
RNH1_PAPAN	6-month protocol vs 3-month protocol	-0.134564	0.666667	0.955001	Not Significant
LAMB2_PAPAN	6-month protocol vs 3-month protocol	-0.13479	0.666667	0.955001	Not Significant
UNC13D_PAPAN	6-month protocol vs 3-month protocol	-0.13585	0.833333	0.990959	Not Significant
GSDMA_PIG	6-month protocol vs 3-month protocol	-0.136543	0.833333	0.990959	Not Significant
CUL4A_PAPAN	6-month protocol vs 3-month protocol	-0.136983	1	1	Not Significant
IL18_PAPAN	6-month protocol vs 3-month protocol	-0.137056	1	1	Not Significant
KRT14_PAPAN	6-month protocol vs 3-month protocol	-0.137611	1	1	Not Significant
VWCE_PAPAN	6-month protocol vs 3-month protocol	-0.138166	1	1	Not Significant
HCK_PAPAN	6-month protocol vs 3-month protocol	-0.141543	0.666667	0.955001	Not Significant
IGHM_PAPAN	6-month protocol vs 3-month protocol	-0.142873	1	1	Not Significant
MVK_PAPAN	6-month protocol vs 3-month protocol	-0.143401	1	1	Not Significant
PDGFRB_PAPAN	6-month protocol vs 3-month protocol	-0.144446	1	1	Not Significant
APOH_PIG	6-month protocol vs 3-month protocol	-0.144453	1	1	Not Significant
MASP1_PAPAN	6-month protocol vs 3-month protocol	-0.144882	1	1	Not Significant
COMP_PAPAN	6-month protocol vs 3-month protocol	-0.145001	0.833333	0.990959	Not Significant
HEG1_PAPAN	6-month protocol vs 3-month protocol	-0.145512	1	1	Not Significant
FN1_PAPAN	6-month protocol vs 3-month protocol	-0.146362	0.666667	0.955001	Not Significant
RPS19_PIG	6-month protocol vs 3-month protocol	-0.146896	1	1	Not Significant
KNG1_PAPAN	6-month protocol vs 3-month protocol	-0.147197	1	1	Not Significant
CMPK1_PAPAN	6-month protocol vs 3-month protocol	-0.147774	0.833333	0.990959	Not Significant
PLG_PIG	6-month protocol vs 3-month protocol	-0.148445	0.833333	0.990959	Not Significant
D2HGDH_PAPAN	6-month protocol vs 3-month protocol	-0.148904	0.666667	0.955001	Not Significant
CAP2_PAPAN	6-month protocol vs 3-month protocol	-0.148937	0.516667	0.946938	Not Significant
CCT7_PAPAN	6-month protocol vs 3-month protocol	-0.149348	0.833333	0.990959	Not Significant
CD55_PAPAN	6-month protocol vs 3-month protocol	-0.150038	0.833333	0.990959	Not Significant
FLII_PAPAN	6-month protocol vs 3-month protocol	-0.151278	0.266667	0.906667	Not Significant
AIFM1_PAPAN	6-month protocol vs 3-month protocol	-0.151847	1	1	Not Significant
ENG_PAPAN	6-month protocol vs 3-month protocol	-0.152546	0.266667	0.906667	Not Significant
IFIT5_PAPAN	6-month protocol vs 3-month protocol	-0.153357	1	1	Not Significant
GANAB_PAPAN	6-month protocol vs 3-month protocol	-0.153645	0.516667	0.946938	Not Significant
TGFBR3_PAPAN	6-month protocol vs 3-month protocol	-0.153877	1	1	Not Significant
MMRN2_PAPAN	6-month protocol vs 3-month protocol	-0.155171	1	1	Not Significant
F11_PAPAN	6-month protocol vs 3-month protocol	-0.155572	0.833333	0.990959	Not Significant
A2ML1_PAPAN	6-month protocol vs 3-month protocol	-0.156225	0.383333	0.933674	Not Significant
DSC1_PAPAN	6-month protocol vs 3-month protocol	-0.157083	0.833333	0.990959	Not Significant
TGM1_PAPAN	6-month protocol vs 3-month protocol	-0.157695	0.666667	0.955001	Not Significant
ADAMTSL2_PAPAN	6-month protocol vs 3-month protocol	-0.157938	1	1	Not Significant
MMRN1_PAPAN	6-month protocol vs 3-month protocol	-0.157982	1	1	Not Significant
EPPK1_PIG	6-month protocol vs 3-month protocol	-0.158738	0.266667	0.906667	Not Significant
APOH_PAPAN	6-month protocol vs 3-month protocol	-0.159281	0.383333	0.933674	Not Significant
HABP2_PAPAN	6-month protocol vs 3-month protocol	-0.159455	0.833333	0.990959	Not Significant
RPL12_PIG	6-month protocol vs 3-month protocol	-0.159518	0.833333	0.990959	Not Significant
ALDH8A1_PAPAN	6-month protocol vs 3-month protocol	-0.159805	0.833333	0.990959	Not Significant
ACP5_PAPAN	6-month protocol vs 3-month protocol	-0.159809	0.383333	0.933674	Not Significant
NMRAL1_PAPAN	6-month protocol vs 3-month protocol	-0.159864	0.383333	0.933674	Not Significant
SERPINA11_PAPAN	6-month protocol vs 3-month protocol	-0.159899	0.516667	0.946938	Not Significant
PRELP_PAPAN	6-month protocol vs 3-month protocol	-0.160302	0.666667	0.955001	Not Significant
NLRX1_PAPAN	6-month protocol vs 3-month protocol	-0.160609	0.383333	0.933674	Not Significant
VCAN_PAPAN	6-month protocol vs 3-month protocol	-0.161582	0.833333	0.990959	Not Significant
APOBEC2_PAPAN	6-month protocol vs 3-month protocol	-0.161715	0.666667	0.955001	Not Significant
ITGAX_PAPAN	6-month protocol vs 3-month protocol	-0.161768	0.383333	0.933674	Not Significant
IPO4_PAPAN	6-month protocol vs 3-month protocol	-0.162787	0.833333	0.990959	Not Significant
LCN2_PAPAN	6-month protocol vs 3-month protocol	-0.16306	0.516667	0.946938	Not Significant
PYGB_PAPAN	6-month protocol vs 3-month protocol	-0.163497	0.383333	0.933674	Not Significant
EIF2AK2_PAPAN	6-month protocol vs 3-month protocol	-0.163587	0.516667	0.946938	Not Significant
QPRT_PAPAN	6-month protocol vs 3-month protocol	-0.16365	0.833333	0.990959	Not Significant
EPHX1_PAPAN	6-month protocol vs 3-month protocol	-0.16539	0.833333	0.990959	Not Significant
GLO1_PAPAN	6-month protocol vs 3-month protocol	-0.16587	1	1	Not Significant
GDF15_PAPAN	6-month protocol vs 3-month protocol	-0.166783	1	1	Not Significant
GZMB_PAPAN	6-month protocol vs 3-month protocol	-0.166983	1	1	Not Significant
STAMBPL1_PAPAN	6-month protocol vs 3-month protocol	-0.167046	0.833333	0.990959	Not Significant
OSMR_PAPAN	6-month protocol vs 3-month protocol	-0.16752	1	1	Not Significant
TCOF1_PAPAN	6-month protocol vs 3-month protocol	-0.167955	0.666667	0.955001	Not Significant
ITGAL_PAPAN	6-month protocol vs 3-month protocol	-0.168417	0.516667	0.946938	Not Significant
SEMA4B_PIG	6-month protocol vs 3-month protocol	-0.16954	0.833333	0.990959	Not Significant
HSPD1_PIG	6-month protocol vs 3-month protocol	-0.171099	0.666667	0.955001	Not Significant
HELZ2_PAPAN	6-month protocol vs 3-month protocol	-0.171289	0.666667	0.955001	Not Significant
OAF_PAPAN	6-month protocol vs 3-month protocol	-0.173649	0.666667	0.955001	Not Significant
NUDT5_PAPAN	6-month protocol vs 3-month protocol	-0.173964	0.833333	0.990959	Not Significant
SLC33A1_PAPAN	6-month protocol vs 3-month protocol	-0.17455	0.516667	0.946938	Not Significant
AKAP12_PAPAN	6-month protocol vs 3-month protocol	-0.175783	0.833333	0.990959	Not Significant
GPNMB_PAPAN	6-month protocol vs 3-month protocol	-0.176869	0.833333	0.990959	Not Significant
MGAT1_PIG	6-month protocol vs 3-month protocol	-0.177025	0.666667	0.955001	Not Significant
SCPEP1_PAPAN	6-month protocol vs 3-month protocol	-0.178567	0.516667	0.946938	Not Significant
MYLK_PAPAN	6-month protocol vs 3-month protocol	-0.178613	0.833333	0.990959	Not Significant
UBR4_PAPAN	6-month protocol vs 3-month protocol	-0.178742	0.666667	0.955001	Not Significant
GSTZ1_PAPAN	6-month protocol vs 3-month protocol	-0.17918	0.833333	0.990959	Not Significant
ENO3_PAPAN	6-month protocol vs 3-month protocol	-0.181702	1	1	Not Significant
ZG16_PAPAN	6-month protocol vs 3-month protocol	-0.182359	0.666667	0.955001	Not Significant
LGALS3BP_PIG	6-month protocol vs 3-month protocol	-0.183478	0.666667	0.955001	Not Significant
ATP5F1C_PAPAN	6-month protocol vs 3-month protocol	-0.185206	1	1	Not Significant
CEMIP_PAPAN	6-month protocol vs 3-month protocol	-0.186125	0.516667	0.946938	Not Significant
PLG_PAPAN	6-month protocol vs 3-month protocol	-0.186421	0.0166667	0.544444	Not Significant
VPS13C_PIG	6-month protocol vs 3-month protocol	-0.186746	0.666667	0.955001	Not Significant
FPR1_PAPAN	6-month protocol vs 3-month protocol	-0.187537	0.516667	0.946938	Not Significant
PTPN6_PAPAN	6-month protocol vs 3-month protocol	-0.187896	0.833333	0.990959	Not Significant
TBCA_PAPAN	6-month protocol vs 3-month protocol	-0.19051	0.833333	0.990959	Not Significant
ANXA11_PAPAN	6-month protocol vs 3-month protocol	-0.190603	0.666667	0.955001	Not Significant
GNA15_PAPAN	6-month protocol vs 3-month protocol	-0.191016	0.666667	0.955001	Not Significant
PRG4_PIG	6-month protocol vs 3-month protocol	-0.191314	1	1	Not Significant
PDAP1_PIG	6-month protocol vs 3-month protocol	-0.191452	0.833333	0.990959	Not Significant
SPINK5_PAPAN	6-month protocol vs 3-month protocol	-0.192202	1	1	Not Significant
LEMD2_PAPAN	6-month protocol vs 3-month protocol	-0.192206	1	1	Not Significant
ECHDC2_PAPAN	6-month protocol vs 3-month protocol	-0.193229	1	1	Not Significant
POSTN_PIG	6-month protocol vs 3-month protocol	-0.194363	1	1	Not Significant
HEMGN_PAPAN	6-month protocol vs 3-month protocol	-0.194468	1	1	Not Significant
HEBP1_PAPAN	6-month protocol vs 3-month protocol	-0.195072	0.383333	0.933674	Not Significant
ABAT_PAPAN	6-month protocol vs 3-month protocol	-0.195643	0.516667	0.946938	Not Significant
AKR7A2_PAPAN	6-month protocol vs 3-month protocol	-0.195971	0.833333	0.990959	Not Significant
MAN2A1_PIG	6-month protocol vs 3-month protocol	-0.196029	0.666667	0.955001	Not Significant
SNAP23_PAPAN	6-month protocol vs 3-month protocol	-0.196415	0.666667	0.955001	Not Significant
ANGPTL6_PAPAN	6-month protocol vs 3-month protocol	-0.19706	0.516667	0.946938	Not Significant
ME1_PIG	6-month protocol vs 3-month protocol	-0.197315	0.666667	0.955001	Not Significant
OASL_PAPAN	6-month protocol vs 3-month protocol	-0.197718	0.666667	0.955001	Not Significant
ANTXR2_PAPAN	6-month protocol vs 3-month protocol	-0.197776	0.833333	0.990959	Not Significant
C6orf120_PAPAN	6-month protocol vs 3-month protocol	-0.198047	0.516667	0.946938	Not Significant
CRYBG1_PAPAN	6-month protocol vs 3-month protocol	-0.19874	0.516667	0.946938	Not Significant
HSD17B10_PAPAN	6-month protocol vs 3-month protocol	-0.19913	0.666667	0.955001	Not Significant
CHGB_PAPAN	6-month protocol vs 3-month protocol	-0.20278	1	1	Not Significant
HEPHL1_PAPAN	6-month protocol vs 3-month protocol	-0.203511	1	1	Not Significant
ATP5F1A_PIG	6-month protocol vs 3-month protocol	-0.20414	0.383333	0.933674	Not Significant
ALDH16A1_PAPAN	6-month protocol vs 3-month protocol	-0.206063	0.666667	0.955001	Not Significant
ASPDH_PAPAN	6-month protocol vs 3-month protocol	-0.206572	1	1	Not Significant
RABL6_PAPAN	6-month protocol vs 3-month protocol	-0.206908	0.516667	0.946938	Not Significant
RPS15_PIG	6-month protocol vs 3-month protocol	-0.206911	1	1	Not Significant
HPRT1_PAPAN	6-month protocol vs 3-month protocol	-0.207694	0.833333	0.990959	Not Significant
HRG_PIG	6-month protocol vs 3-month protocol	-0.208114	1	1	Not Significant
GOT1_PAPAN	6-month protocol vs 3-month protocol	-0.208916	1	1	Not Significant
GP5_PAPAN	6-month protocol vs 3-month protocol	-0.209188	1	1	Not Significant
BLVRA_PAPAN	6-month protocol vs 3-month protocol	-0.209401	0.833333	0.990959	Not Significant
FGGY_PAPAN	6-month protocol vs 3-month protocol	-0.209822	1	1	Not Significant
DECR1_PAPAN	6-month protocol vs 3-month protocol	-0.21022	0.516667	0.946938	Not Significant
OGDH_PAPAN	6-month protocol vs 3-month protocol	-0.211066	0.516667	0.946938	Not Significant
MINPP1_PAPAN	6-month protocol vs 3-month protocol	-0.211155	0.833333	0.990959	Not Significant
ATP1B3_PAPAN	6-month protocol vs 3-month protocol	-0.211331	0.383333	0.933674	Not Significant
MGLL_PAPAN	6-month protocol vs 3-month protocol	-0.211705	0.516667	0.946938	Not Significant
DMKN_PAPAN	6-month protocol vs 3-month protocol	-0.212342	0.516667	0.946938	Not Significant
NEMF_PAPAN	6-month protocol vs 3-month protocol	-0.212383	0.833333	0.990959	Not Significant
THBS4_PAPAN	6-month protocol vs 3-month protocol	-0.213215	0.516667	0.946938	Not Significant
PON2_PAPAN	6-month protocol vs 3-month protocol	-0.213473	0.516667	0.946938	Not Significant
STARD5_PAPAN	6-month protocol vs 3-month protocol	-0.214124	0.666667	0.955001	Not Significant
MOB3A_PAPAN	6-month protocol vs 3-month protocol	-0.214881	0.666667	0.955001	Not Significant
GLB1_PAPAN	6-month protocol vs 3-month protocol	-0.21544	0.666667	0.955001	Not Significant
LDHB_PAPAN	6-month protocol vs 3-month protocol	-0.216248	1	1	Not Significant
DPYSL3_PAPAN	6-month protocol vs 3-month protocol	-0.216984	0.383333	0.933674	Not Significant
ABCF1_PAPAN	6-month protocol vs 3-month protocol	-0.217394	0.666667	0.955001	Not Significant
AKR1C1_PAPAN	6-month protocol vs 3-month protocol	-0.217437	0.833333	0.990959	Not Significant
STXBP3_PAPAN	6-month protocol vs 3-month protocol	-0.218113	0.666667	0.955001	Not Significant
IHH_PAPAN	6-month protocol vs 3-month protocol	-0.218628	0.666667	0.955001	Not Significant
ANXA4_PAPAN	6-month protocol vs 3-month protocol	-0.21875	0.833333	0.990959	Not Significant
PCYT2_PAPAN	6-month protocol vs 3-month protocol	-0.221224	0.183333	0.882755	Not Significant
SVIL_PAPAN	6-month protocol vs 3-month protocol	-0.221546	0.666667	0.955001	Not Significant
CAPN1_PAPAN	6-month protocol vs 3-month protocol	-0.221571	0.383333	0.933674	Not Significant
LRBA_PAPAN	6-month protocol vs 3-month protocol	-0.222991	0.833333	0.990959	Not Significant
PLTP_PAPAN	6-month protocol vs 3-month protocol	-0.223282	1	1	Not Significant
LGALS3BP_PAPAN	6-month protocol vs 3-month protocol	-0.223724	0.516667	0.946938	Not Significant
ADH5_PAPAN	6-month protocol vs 3-month protocol	-0.223915	1	1	Not Significant
IGF2_PIG	6-month protocol vs 3-month protocol	-0.22417	1	1	Not Significant
HADHA_PAPAN	6-month protocol vs 3-month protocol	-0.224829	0.266667	0.906667	Not Significant
UNC45A_PAPAN	6-month protocol vs 3-month protocol	-0.224858	0.833333	0.990959	Not Significant
PRDX2_PAPAN	6-month protocol vs 3-month protocol	-0.225377	1	1	Not Significant
IMPA1_PAPAN	6-month protocol vs 3-month protocol	-0.226141	0.516667	0.946938	Not Significant
ADGRF5_PAPAN	6-month protocol vs 3-month protocol	-0.226795	0.383333	0.933674	Not Significant
ABCB6_PAPAN	6-month protocol vs 3-month protocol	-0.229321	0.516667	0.946938	Not Significant
ALDH3A1_PAPAN	6-month protocol vs 3-month protocol	-0.230358	0.833333	0.990959	Not Significant
CNDP1_PAPAN	6-month protocol vs 3-month protocol	-0.231823	0.516667	0.946938	Not Significant
MAN1A1_PAPAN	6-month protocol vs 3-month protocol	-0.232994	0.833333	0.990959	Not Significant
CUL3_PAPAN	6-month protocol vs 3-month protocol	-0.233007	0.833333	0.990959	Not Significant
SERPINA10_PAPAN	6-month protocol vs 3-month protocol	-0.233272	0.266667	0.906667	Not Significant
ARIH1_PIG	6-month protocol vs 3-month protocol	-0.234156	1	1	Not Significant
LMCD1_PAPAN	6-month protocol vs 3-month protocol	-0.23485	0.833333	0.990959	Not Significant
SLC16A3_PAPAN	6-month protocol vs 3-month protocol	-0.23497	0.516667	0.946938	Not Significant
MAN2A1_PAPAN	6-month protocol vs 3-month protocol	-0.237204	0.183333	0.882755	Not Significant
STC2_PAPAN	6-month protocol vs 3-month protocol	-0.238327	1	1	Not Significant
CD14_PAPAN	6-month protocol vs 3-month protocol	-0.239658	0.833333	0.990959	Not Significant
PACSIN2_PAPAN	6-month protocol vs 3-month protocol	-0.241277	1	1	Not Significant
CS_PAPAN	6-month protocol vs 3-month protocol	-0.242153	0.666667	0.955001	Not Significant
PAPLN_PAPAN	6-month protocol vs 3-month protocol	-0.242237	0.666667	0.955001	Not Significant
B4GALT1_PAPAN	6-month protocol vs 3-month protocol	-0.244078	0.666667	0.955001	Not Significant
COL18A1_PIG	6-month protocol vs 3-month protocol	-0.246391	0.383333	0.933674	Not Significant
GGT5_PAPAN	6-month protocol vs 3-month protocol	-0.247667	0.516667	0.946938	Not Significant
C7_PAPAN	6-month protocol vs 3-month protocol	-0.2495	0.516667	0.946938	Not Significant
MAP2K3_PAPAN	6-month protocol vs 3-month protocol	-0.250421	0.666667	0.955001	Not Significant
LAMB1_PAPAN	6-month protocol vs 3-month protocol	-0.250516	0.666667	0.955001	Not Significant
MYO1F_PAPAN	6-month protocol vs 3-month protocol	-0.250753	0.383333	0.933674	Not Significant
HSPE1_PIG	6-month protocol vs 3-month protocol	-0.253316	0.833333	0.990959	Not Significant
CLEC14A_PAPAN	6-month protocol vs 3-month protocol	-0.253699	1	1	Not Significant
RETN_PAPAN	6-month protocol vs 3-month protocol	-0.254047	0.833333	0.990959	Not Significant
FERMT1_PAPAN	6-month protocol vs 3-month protocol	-0.256892	0.666667	0.955001	Not Significant
PTPRJ_PAPAN	6-month protocol vs 3-month protocol	-0.257444	0.666667	0.955001	Not Significant
TOR1B_PAPAN	6-month protocol vs 3-month protocol	-0.258489	0.666667	0.955001	Not Significant
FECH_PAPAN	6-month protocol vs 3-month protocol	-0.258605	0.516667	0.946938	Not Significant
PRDX5_PAPAN	6-month protocol vs 3-month protocol	-0.258866	0.666667	0.955001	Not Significant
GRK6_PAPAN	6-month protocol vs 3-month protocol	-0.259168	0.183333	0.882755	Not Significant
ATP6V1C2_PAPAN	6-month protocol vs 3-month protocol	-0.259185	0.383333	0.933674	Not Significant
SEMA4B_PAPAN	6-month protocol vs 3-month protocol	-0.259961	0.666667	0.955001	Not Significant
THRAP3_PAPAN	6-month protocol vs 3-month protocol	-0.260023	0.183333	0.882755	Not Significant
FBLN1_PIG	6-month protocol vs 3-month protocol	-0.260632	0.516667	0.946938	Not Significant
ASPH_PAPAN	6-month protocol vs 3-month protocol	-0.261544	0.383333	0.933674	Not Significant
SLC3A2_PAPAN	6-month protocol vs 3-month protocol	-0.261926	0.833333	0.990959	Not Significant
IGF2R_PAPAN	6-month protocol vs 3-month protocol	-0.262742	0.383333	0.933674	Not Significant
RNF126_PIG	6-month protocol vs 3-month protocol	-0.262802	0.516667	0.946938	Not Significant
RHOT2_PIG	6-month protocol vs 3-month protocol	-0.263292	0.266667	0.906667	Not Significant
EIF2B4_PAPAN	6-month protocol vs 3-month protocol	-0.264465	0.833333	0.990959	Not Significant
SERPINA5_PAPAN	6-month protocol vs 3-month protocol	-0.264558	0.666667	0.955001	Not Significant
SPAG9_PAPAN	6-month protocol vs 3-month protocol	-0.264686	0.666667	0.955001	Not Significant
LIPG_PAPAN	6-month protocol vs 3-month protocol	-0.267564	0.833333	0.990959	Not Significant
ME1_PAPAN	6-month protocol vs 3-month protocol	-0.268725	0.666667	0.955001	Not Significant
HEXA_PAPAN	6-month protocol vs 3-month protocol	-0.268756	0.666667	0.955001	Not Significant
PI16_PAPAN	6-month protocol vs 3-month protocol	-0.271378	0.666667	0.955001	Not Significant
LMNA_PAPAN	6-month protocol vs 3-month protocol	-0.272536	1	1	Not Significant
TUBB1_PAPAN	6-month protocol vs 3-month protocol	-0.273557	0.666667	0.955001	Not Significant
LONP1_PAPAN	6-month protocol vs 3-month protocol	-0.274885	0.666667	0.955001	Not Significant
PSMD6_PAPAN	6-month protocol vs 3-month protocol	-0.275402	0.383333	0.933674	Not Significant
QARS1_PAPAN	6-month protocol vs 3-month protocol	-0.275932	0.666667	0.955001	Not Significant
FARSA_PAPAN	6-month protocol vs 3-month protocol	-0.276639	0.666667	0.955001	Not Significant
CSPG4_PIG	6-month protocol vs 3-month protocol	-0.277732	0.183333	0.882755	Not Significant
SYTL4_PAPAN	6-month protocol vs 3-month protocol	-0.278091	0.666667	0.955001	Not Significant
NUP155_PAPAN	6-month protocol vs 3-month protocol	-0.278417	0.833333	0.990959	Not Significant
MTDH_PAPAN	6-month protocol vs 3-month protocol	-0.278815	0.666667	0.955001	Not Significant
RDH10_PAPAN	6-month protocol vs 3-month protocol	-0.279345	0.516667	0.946938	Not Significant
F9_PIG	6-month protocol vs 3-month protocol	-0.281657	1	1	Not Significant
NHERF2_PAPAN	6-month protocol vs 3-month protocol	-0.282092	0.666667	0.955001	Not Significant
CTPS1_PAPAN	6-month protocol vs 3-month protocol	-0.28211	0.383333	0.933674	Not Significant
ARPC5_PAPAN	6-month protocol vs 3-month protocol	-0.283071	0.833333	0.990959	Not Significant
CCL21_PAPAN	6-month protocol vs 3-month protocol	-0.283452	1	1	Not Significant
HSD17B12_PAPAN	6-month protocol vs 3-month protocol	-0.284154	0.833333	0.990959	Not Significant
NBEAL2_PAPAN	6-month protocol vs 3-month protocol	-0.285242	0.516667	0.946938	Not Significant
RAN_PIG	6-month protocol vs 3-month protocol	-0.285545	0.833333	0.990959	Not Significant
WNK1_PAPAN	6-month protocol vs 3-month protocol	-0.286464	0.116667	0.81325	Not Significant
PLA2G4E_PAPAN	6-month protocol vs 3-month protocol	-0.287249	0.266667	0.906667	Not Significant
CYP2D6_PAPAN	6-month protocol vs 3-month protocol	-0.287297	0.666667	0.955001	Not Significant
POF1B_PAPAN	6-month protocol vs 3-month protocol	-0.288846	0.833333	0.990959	Not Significant
RELN_PAPAN	6-month protocol vs 3-month protocol	-0.289883	0.516667	0.946938	Not Significant
ZNF185_PAPAN	6-month protocol vs 3-month protocol	-0.290512	0.383333	0.933674	Not Significant
NDRG2_PAPAN	6-month protocol vs 3-month protocol	-0.291398	0.516667	0.946938	Not Significant
SMPD3_PAPAN	6-month protocol vs 3-month protocol	-0.291993	0.383333	0.933674	Not Significant
S100A3_PAPAN	6-month protocol vs 3-month protocol	-0.292888	0.666667	0.955001	Not Significant
FCN3_PAPAN	6-month protocol vs 3-month protocol	-0.292918	0.516667	0.946938	Not Significant
PGLYRP2_PAPAN	6-month protocol vs 3-month protocol	-0.294012	0.383333	0.933674	Not Significant
RPL32_PIG	6-month protocol vs 3-month protocol	-0.295013	0.383333	0.933674	Not Significant
HMOX2_PAPAN	6-month protocol vs 3-month protocol	-0.295048	0.516667	0.946938	Not Significant
GOT2_PAPAN	6-month protocol vs 3-month protocol	-0.295323	0.666667	0.955001	Not Significant
ANPEP_PAPAN	6-month protocol vs 3-month protocol	-0.295935	0.383333	0.933674	Not Significant
IDI1_PAPAN	6-month protocol vs 3-month protocol	-0.296144	0.183333	0.882755	Not Significant
AGL_PAPAN	6-month protocol vs 3-month protocol	-0.296212	0.833333	0.990959	Not Significant
LOC100302368_PIG	6-month protocol vs 3-month protocol	-0.298232	0.516667	0.946938	Not Significant
SNED1_PAPAN	6-month protocol vs 3-month protocol	-0.298303	0.666667	0.955001	Not Significant
GSTK1_PAPAN	6-month protocol vs 3-month protocol	-0.298772	0.266667	0.906667	Not Significant
ROBO4_PAPAN	6-month protocol vs 3-month protocol	-0.299274	0.116667	0.81325	Not Significant
SEC23IP_PAPAN	6-month protocol vs 3-month protocol	-0.299447	0.516667	0.946938	Not Significant
TM9SF2_PAPAN	6-month protocol vs 3-month protocol	-0.301921	0.666667	0.955001	Not Significant
SERPINA7_PAPAN	6-month protocol vs 3-month protocol	-0.301976	0.383333	0.933674	Not Significant
LDHA_PAPAN	6-month protocol vs 3-month protocol	-0.303192	0.516667	0.946938	Not Significant
VNN2_PAPAN	6-month protocol vs 3-month protocol	-0.30362	1	1	Not Significant
CDH1_PAPAN	6-month protocol vs 3-month protocol	-0.303841	0.666667	0.955001	Not Significant
HHIP_PAPAN	6-month protocol vs 3-month protocol	-0.304614	0.666667	0.955001	Not Significant
MFGE8_PAPAN	6-month protocol vs 3-month protocol	-0.304716	0.516667	0.946938	Not Significant
EML2_PAPAN	6-month protocol vs 3-month protocol	-0.306825	0.383333	0.933674	Not Significant
POGLUT2_PAPAN	6-month protocol vs 3-month protocol	-0.307094	0.666667	0.955001	Not Significant
C8G_PAPAN	6-month protocol vs 3-month protocol	-0.307192	0.183333	0.882755	Not Significant
PZP_PIG	6-month protocol vs 3-month protocol	-0.307286	0.383333	0.933674	Not Significant
CILP2_PAPAN	6-month protocol vs 3-month protocol	-0.308495	0.516667	0.946938	Not Significant
ALCAM_PAPAN	6-month protocol vs 3-month protocol	-0.309107	0.666667	0.955001	Not Significant
GCLM_PAPAN	6-month protocol vs 3-month protocol	-0.309727	0.383333	0.933674	Not Significant
AHSG_PAPAN	6-month protocol vs 3-month protocol	-0.30981	0.516667	0.946938	Not Significant
KRT40_PAPAN	6-month protocol vs 3-month protocol	-0.310354	0.666667	0.955001	Not Significant
MPST_PAPAN	6-month protocol vs 3-month protocol	-0.31042	0.383333	0.933674	Not Significant
PLEC_PIG	6-month protocol vs 3-month protocol	-0.310714	0.516667	0.946938	Not Significant
EIF3B_PAPAN	6-month protocol vs 3-month protocol	-0.311146	0.516667	0.946938	Not Significant
FBLN1_PAPAN	6-month protocol vs 3-month protocol	-0.312248	0.516667	0.946938	Not Significant
CPA1_PAPAN	6-month protocol vs 3-month protocol	-0.313387	0.383333	0.933674	Not Significant
CLYBL_PAPAN	6-month protocol vs 3-month protocol	-0.313775	0.383333	0.933674	Not Significant
ALDOC_PAPAN	6-month protocol vs 3-month protocol	-0.314726	0.266667	0.906667	Not Significant
GOLGA2_PAPAN	6-month protocol vs 3-month protocol	-0.315705	0.666667	0.955001	Not Significant
EIF4H_PIG	6-month protocol vs 3-month protocol	-0.315957	0.383333	0.933674	Not Significant
SOD1_PAPAN	6-month protocol vs 3-month protocol	-0.317081	0.383333	0.933674	Not Significant
GOLGA4_PAPAN	6-month protocol vs 3-month protocol	-0.317128	0.666667	0.955001	Not Significant
CYP51A1_PAPAN	6-month protocol vs 3-month protocol	-0.318737	0.666667	0.955001	Not Significant
RNPEP_PIG	6-month protocol vs 3-month protocol	-0.319244	0.183333	0.882755	Not Significant
LTBP2_PAPAN	6-month protocol vs 3-month protocol	-0.319732	1	1	Not Significant
CCT5_PAPAN	6-month protocol vs 3-month protocol	-0.320898	0.383333	0.933674	Not Significant
PPA2_PAPAN	6-month protocol vs 3-month protocol	-0.321153	0.266667	0.906667	Not Significant
LARS1_PAPAN	6-month protocol vs 3-month protocol	-0.321608	0.666667	0.955001	Not Significant
NT5C_PAPAN	6-month protocol vs 3-month protocol	-0.322118	0.833333	0.990959	Not Significant
NAPRT_PAPAN	6-month protocol vs 3-month protocol	-0.322161	0.383333	0.933674	Not Significant
HCFC1_PIG	6-month protocol vs 3-month protocol	-0.323627	0.833333	0.990959	Not Significant
EEF1G_PAPAN	6-month protocol vs 3-month protocol	-0.325174	0.666667	0.955001	Not Significant
FLNB_PAPAN	6-month protocol vs 3-month protocol	-0.325287	0.516667	0.946938	Not Significant
KIAA0513_PAPAN	6-month protocol vs 3-month protocol	-0.325753	0.516667	0.946938	Not Significant
ATL3_PAPAN	6-month protocol vs 3-month protocol	-0.327631	0.183333	0.882755	Not Significant
IDE_PAPAN	6-month protocol vs 3-month protocol	-0.32884	0.666667	0.955001	Not Significant
GLA_PAPAN	6-month protocol vs 3-month protocol	-0.329295	0.266667	0.906667	Not Significant
FAHD1_PAPAN	6-month protocol vs 3-month protocol	-0.331291	0.833333	0.990959	Not Significant
SHMT1_PAPAN	6-month protocol vs 3-month protocol	-0.331335	0.833333	0.990959	Not Significant
ITGB1_PAPAN	6-month protocol vs 3-month protocol	-0.333631	0.516667	0.946938	Not Significant
LTBP4_PAPAN	6-month protocol vs 3-month protocol	-0.333677	0.183333	0.882755	Not Significant
SPRR4_PAPAN	6-month protocol vs 3-month protocol	-0.333776	0.516667	0.946938	Not Significant
QPCT_PAPAN	6-month protocol vs 3-month protocol	-0.333931	0.383333	0.933674	Not Significant
PLXNA1_PAPAN	6-month protocol vs 3-month protocol	-0.335183	1	1	Not Significant
AKR1A1_PAPAN	6-month protocol vs 3-month protocol	-0.33561	0.0333333	0.685597	Not Significant
CSTA_PAPAN	6-month protocol vs 3-month protocol	-0.336023	0.666667	0.955001	Not Significant
ADD1_PAPAN	6-month protocol vs 3-month protocol	-0.338757	0.266667	0.906667	Not Significant
CLEC3B_PAPAN	6-month protocol vs 3-month protocol	-0.339197	0.516667	0.946938	Not Significant
MRI1_PAPAN	6-month protocol vs 3-month protocol	-0.341014	1	1	Not Significant
TMEM43_PAPAN	6-month protocol vs 3-month protocol	-0.341924	0.666667	0.955001	Not Significant
LNPEP_PAPAN	6-month protocol vs 3-month protocol	-0.342266	0.383333	0.933674	Not Significant
SERPINA6_PAPAN	6-month protocol vs 3-month protocol	-0.342327	0.266667	0.906667	Not Significant
MMP19_PAPAN	6-month protocol vs 3-month protocol	-0.343312	0.266667	0.906667	Not Significant
HMCN1_PAPAN	6-month protocol vs 3-month protocol	-0.344439	0.183333	0.882755	Not Significant
ME2_PAPAN	6-month protocol vs 3-month protocol	-0.344861	0.666667	0.955001	Not Significant
HM13_PAPAN	6-month protocol vs 3-month protocol	-0.344956	0.666667	0.955001	Not Significant
EGFLAM_PAPAN	6-month protocol vs 3-month protocol	-0.34501	0.833333	0.990959	Not Significant
IFI6_PAPAN	6-month protocol vs 3-month protocol	-0.346135	0.833333	0.990959	Not Significant
ABI3BP_PAPAN	6-month protocol vs 3-month protocol	-0.347578	0.266667	0.906667	Not Significant
HSPG2_PAPAN	6-month protocol vs 3-month protocol	-0.348539	0.516667	0.946938	Not Significant
ANGPTL3_PAPAN	6-month protocol vs 3-month protocol	-0.349215	0.383333	0.933674	Not Significant
COPS8_PAPAN	6-month protocol vs 3-month protocol	-0.349295	0.266667	0.906667	Not Significant
PPP5C_PAPAN	6-month protocol vs 3-month protocol	-0.350258	0.266667	0.906667	Not Significant
TGM2_PAPAN	6-month protocol vs 3-month protocol	-0.351232	0.666667	0.955001	Not Significant
MVB12A_PAPAN	6-month protocol vs 3-month protocol	-0.352029	0.266667	0.906667	Not Significant
GPI_PAPAN	6-month protocol vs 3-month protocol	-0.352148	0.516667	0.946938	Not Significant
ECHDC3_PAPAN	6-month protocol vs 3-month protocol	-0.352394	0.516667	0.946938	Not Significant
MCAM_PAPAN	6-month protocol vs 3-month protocol	-0.353958	0.266667	0.906667	Not Significant
PDIA6_PAPAN	6-month protocol vs 3-month protocol	-0.354571	0.666667	0.955001	Not Significant
CYB5R1_PAPAN	6-month protocol vs 3-month protocol	-0.355062	0.666667	0.955001	Not Significant
SEMA4D_PAPAN	6-month protocol vs 3-month protocol	-0.355225	0.516667	0.946938	Not Significant
PLEKHO2_PAPAN	6-month protocol vs 3-month protocol	-0.355555	0.116667	0.81325	Not Significant
TGFBI_PAPAN	6-month protocol vs 3-month protocol	-0.356206	0.666667	0.955001	Not Significant
GART_PIG	6-month protocol vs 3-month protocol	-0.356571	0.516667	0.946938	Not Significant
NT5E_PAPAN	6-month protocol vs 3-month protocol	-0.358498	0.266667	0.906667	Not Significant
PROS1_PAPAN	6-month protocol vs 3-month protocol	-0.360322	0.666667	0.955001	Not Significant
MCCC1_PAPAN	6-month protocol vs 3-month protocol	-0.361887	0.383333	0.933674	Not Significant
PGM2_PAPAN	6-month protocol vs 3-month protocol	-0.362827	0.516667	0.946938	Not Significant
NRP2_PAPAN	6-month protocol vs 3-month protocol	-0.364783	0.516667	0.946938	Not Significant
GNPTG_PAPAN	6-month protocol vs 3-month protocol	-0.366993	0.516667	0.946938	Not Significant
MOGS_PAPAN	6-month protocol vs 3-month protocol	-0.368562	0.266667	0.906667	Not Significant
TCN2_PAPAN	6-month protocol vs 3-month protocol	-0.369183	0.383333	0.933674	Not Significant
HSPA9_PAPAN	6-month protocol vs 3-month protocol	-0.36933	0.516667	0.946938	Not Significant
TST_PAPAN	6-month protocol vs 3-month protocol	-0.369352	0.0666667	0.745414	Not Significant
ERO1A_PAPAN	6-month protocol vs 3-month protocol	-0.369736	0.666667	0.955001	Not Significant
CPA4_PAPAN	6-month protocol vs 3-month protocol	-0.369887	1	1	Not Significant
ACAT2_PAPAN	6-month protocol vs 3-month protocol	-0.371822	0.666667	0.955001	Not Significant
ANXA6_PAPAN	6-month protocol vs 3-month protocol	-0.371986	0.666667	0.955001	Not Significant
SMOC2_PIG	6-month protocol vs 3-month protocol	-0.372787	0.833333	0.990959	Not Significant
GCN1_PAPAN	6-month protocol vs 3-month protocol	-0.373921	0.666667	0.955001	Not Significant
AZGP1_PAPAN	6-month protocol vs 3-month protocol	-0.374146	0.516667	0.946938	Not Significant
CTNNA1_PAPAN	6-month protocol vs 3-month protocol	-0.375963	0.833333	0.990959	Not Significant
CCT8_PAPAN	6-month protocol vs 3-month protocol	-0.376464	0.516667	0.946938	Not Significant
RPS11_PIG	6-month protocol vs 3-month protocol	-0.377366	0.383333	0.933674	Not Significant
RALBP1_PAPAN	6-month protocol vs 3-month protocol	-0.37799	0.383333	0.933674	Not Significant
LANCL2_PAPAN	6-month protocol vs 3-month protocol	-0.378321	0.516667	0.946938	Not Significant
GP1BA_PAPAN	6-month protocol vs 3-month protocol	-0.379777	0.266667	0.906667	Not Significant
AGXT2_PAPAN	6-month protocol vs 3-month protocol	-0.380488	0.116667	0.81325	Not Significant
GALK1_PAPAN	6-month protocol vs 3-month protocol	-0.380888	0.833333	0.990959	Not Significant
AGT_PIG	6-month protocol vs 3-month protocol	-0.381573	0.183333	0.882755	Not Significant
LANCL1_PAPAN	6-month protocol vs 3-month protocol	-0.382046	0.383333	0.933674	Not Significant
SHTN1_PAPAN	6-month protocol vs 3-month protocol	-0.382259	0.383333	0.933674	Not Significant
ARF4_PAPAN	6-month protocol vs 3-month protocol	-0.382322	0.516667	0.946938	Not Significant
CYB5R3_PAPAN	6-month protocol vs 3-month protocol	-0.383104	0.0666667	0.745414	Not Significant
DNMT1_PAPAN	6-month protocol vs 3-month protocol	-0.383397	0.516667	0.946938	Not Significant
SPINK1_PAPAN	6-month protocol vs 3-month protocol	-0.383409	0.666667	0.955001	Not Significant
IGFBP3_PAPAN	6-month protocol vs 3-month protocol	-0.384213	0.383333	0.933674	Not Significant
PRPS1_PIG	6-month protocol vs 3-month protocol	-0.386287	0.666667	0.955001	Not Significant
PRCP_PAPAN	6-month protocol vs 3-month protocol	-0.387604	0.516667	0.946938	Not Significant
ALDH3B1_PAPAN	6-month protocol vs 3-month protocol	-0.3882	0.383333	0.933674	Not Significant
ITIH2_PAPAN	6-month protocol vs 3-month protocol	-0.388789	0.266667	0.906667	Not Significant
PLBD1_PAPAN	6-month protocol vs 3-month protocol	-0.389573	0.266667	0.906667	Not Significant
MYBPC2_PIG	6-month protocol vs 3-month protocol	-0.389675	0.833333	0.990959	Not Significant
DHRS9_PAPAN	6-month protocol vs 3-month protocol	-0.39094	0.833333	0.990959	Not Significant
SCFD1_PAPAN	6-month protocol vs 3-month protocol	-0.391622	0.266667	0.906667	Not Significant
PKM_PAPAN	6-month protocol vs 3-month protocol	-0.391744	1	1	Not Significant
PEAK3_PAPAN	6-month protocol vs 3-month protocol	-0.397277	0.833333	0.990959	Not Significant
PTK6_PAPAN	6-month protocol vs 3-month protocol	-0.397732	0.383333	0.933674	Not Significant
JPT2_PAPAN	6-month protocol vs 3-month protocol	-0.399183	0.516667	0.946938	Not Significant
UFL1_PAPAN	6-month protocol vs 3-month protocol	-0.399913	0.0666667	0.745414	Not Significant
RRP12_PAPAN	6-month protocol vs 3-month protocol	-0.40056	0.266667	0.906667	Not Significant
APMAP_PAPAN	6-month protocol vs 3-month protocol	-0.402676	0.266667	0.906667	Not Significant
RPL17_PIG	6-month protocol vs 3-month protocol	-0.403273	0.833333	0.990959	Not Significant
TWF2_PAPAN	6-month protocol vs 3-month protocol	-0.404014	0.0666667	0.745414	Not Significant
SERPINF2_PAPAN	6-month protocol vs 3-month protocol	-0.404579	0.116667	0.81325	Not Significant
CLEC11A_PAPAN	6-month protocol vs 3-month protocol	-0.405664	0.516667	0.946938	Not Significant
FAM114A1_PAPAN	6-month protocol vs 3-month protocol	-0.406978	0.183333	0.882755	Not Significant
CDH5_PAPAN	6-month protocol vs 3-month protocol	-0.406978	0.516667	0.946938	Not Significant
PYM1_PAPAN	6-month protocol vs 3-month protocol	-0.40699	0.183333	0.882755	Not Significant
RAB3GAP2_PAPAN	6-month protocol vs 3-month protocol	-0.407078	0.516667	0.946938	Not Significant
USO1_PAPAN	6-month protocol vs 3-month protocol	-0.407635	0.383333	0.933674	Not Significant
CRYL1_PAPAN	6-month protocol vs 3-month protocol	-0.407665	0.516667	0.946938	Not Significant
SERPIND1_PAPAN	6-month protocol vs 3-month protocol	-0.409084	0.266667	0.906667	Not Significant
OXSR1_PAPAN	6-month protocol vs 3-month protocol	-0.409099	0.383333	0.933674	Not Significant
PKN1_PAPAN	6-month protocol vs 3-month protocol	-0.409676	0.266667	0.906667	Not Significant
STAT1_PAPAN	6-month protocol vs 3-month protocol	-0.410639	0.833333	0.990959	Not Significant
PGP_PAPAN	6-month protocol vs 3-month protocol	-0.412001	0.266667	0.906667	Not Significant
C5_PAPAN	6-month protocol vs 3-month protocol	-0.413784	0.0166667	0.544444	Not Significant
CTSF_PAPAN	6-month protocol vs 3-month protocol	-0.414316	0.383333	0.933674	Not Significant
PDCD6_PIG	6-month protocol vs 3-month protocol	-0.414597	0.116667	0.81325	Not Significant
MYOM1_PAPAN	6-month protocol vs 3-month protocol	-0.414792	0.516667	0.946938	Not Significant
DNAJA1_PIG	6-month protocol vs 3-month protocol	-0.416316	0.383333	0.933674	Not Significant
IGFBP6_PAPAN	6-month protocol vs 3-month protocol	-0.418241	0.666667	0.955001	Not Significant
COL12A1_PAPAN	6-month protocol vs 3-month protocol	-0.418493	0.266667	0.906667	Not Significant
BUB3_PIG	6-month protocol vs 3-month protocol	-0.421037	0.516667	0.946938	Not Significant
TOLLIP_PAPAN	6-month protocol vs 3-month protocol	-0.422811	0.516667	0.946938	Not Significant
FARSB_PAPAN	6-month protocol vs 3-month protocol	-0.425794	0.383333	0.933674	Not Significant
TREH_PAPAN	6-month protocol vs 3-month protocol	-0.426262	0.666667	0.955001	Not Significant
FUOM_PAPAN	6-month protocol vs 3-month protocol	-0.430301	0.383333	0.933674	Not Significant
SRP72_PAPAN	6-month protocol vs 3-month protocol	-0.430482	0.116667	0.81325	Not Significant
ANXA3_PAPAN	6-month protocol vs 3-month protocol	-0.430518	0.516667	0.946938	Not Significant
MCCC2_PAPAN	6-month protocol vs 3-month protocol	-0.430584	0.383333	0.933674	Not Significant
PITRM1_PAPAN	6-month protocol vs 3-month protocol	-0.431694	0.383333	0.933674	Not Significant
FDPS_PAPAN	6-month protocol vs 3-month protocol	-0.433187	0.383333	0.933674	Not Significant
SERPINA12_PAPAN	6-month protocol vs 3-month protocol	-0.433619	0.666667	0.955001	Not Significant
APOA1_PIG	6-month protocol vs 3-month protocol	-0.433666	0.666667	0.955001	Not Significant
BST1_PAPAN	6-month protocol vs 3-month protocol	-0.435259	0.266667	0.906667	Not Significant
UPB1_PAPAN	6-month protocol vs 3-month protocol	-0.438555	0.266667	0.906667	Not Significant
SERPIND1_PIG	6-month protocol vs 3-month protocol	-0.438837	0.266667	0.906667	Not Significant
SERPINF2_PIG	6-month protocol vs 3-month protocol	-0.438936	0.383333	0.933674	Not Significant
CANX_PAPAN	6-month protocol vs 3-month protocol	-0.44083	0.666667	0.955001	Not Significant
PLAT_PAPAN	6-month protocol vs 3-month protocol	-0.441675	0.266667	0.906667	Not Significant
PPM1F_PAPAN	6-month protocol vs 3-month protocol	-0.442442	0.0666667	0.745414	Not Significant
ARHGAP18_PAPAN	6-month protocol vs 3-month protocol	-0.442938	0.383333	0.933674	Not Significant
HEXB_PAPAN	6-month protocol vs 3-month protocol	-0.443922	0.266667	0.906667	Not Significant
LUM_PAPAN	6-month protocol vs 3-month protocol	-0.444589	0.266667	0.906667	Not Significant
FCGBP_PIG	6-month protocol vs 3-month protocol	-0.447149	0.516667	0.946938	Not Significant
NT5C3A_PAPAN	6-month protocol vs 3-month protocol	-0.447398	0.0666667	0.745414	Not Significant
SPTBN2_PAPAN	6-month protocol vs 3-month protocol	-0.447742	0.666667	0.955001	Not Significant
MANBA_PAPAN	6-month protocol vs 3-month protocol	-0.449303	0.383333	0.933674	Not Significant
SLPI_PAPAN	6-month protocol vs 3-month protocol	-0.449677	0.516667	0.946938	Not Significant
UBA6_PAPAN	6-month protocol vs 3-month protocol	-0.450138	0.666667	0.955001	Not Significant
ACSF2_PAPAN	6-month protocol vs 3-month protocol	-0.450506	0.516667	0.946938	Not Significant
ENTPD6_PAPAN	6-month protocol vs 3-month protocol	-0.450564	0.516667	0.946938	Not Significant
FGG_PIG	6-month protocol vs 3-month protocol	-0.450672	0.516667	0.946938	Not Significant
ARHGAP4_PAPAN	6-month protocol vs 3-month protocol	-0.451597	0.183333	0.882755	Not Significant
ADGRG6_PAPAN	6-month protocol vs 3-month protocol	-0.452382	0.266667	0.906667	Not Significant
CPB2_PAPAN	6-month protocol vs 3-month protocol	-0.45294	0.0333333	0.685597	Not Significant
PKP1_PAPAN	6-month protocol vs 3-month protocol	-0.45297	0.183333	0.882755	Not Significant
TAP2_PAPAN	6-month protocol vs 3-month protocol	-0.454493	0.516667	0.946938	Not Significant
ICAM2_PAPAN	6-month protocol vs 3-month protocol	-0.455094	0.833333	0.990959	Not Significant
UPP1_PAPAN	6-month protocol vs 3-month protocol	-0.456068	0.516667	0.946938	Not Significant
DKK2_PAPAN	6-month protocol vs 3-month protocol	-0.456275	0.266667	0.906667	Not Significant
TPRG1_PAPAN	6-month protocol vs 3-month protocol	-0.456378	0.516667	0.946938	Not Significant
CD109_PAPAN	6-month protocol vs 3-month protocol	-0.457049	0.266667	0.906667	Not Significant
EPS8L1_PAPAN	6-month protocol vs 3-month protocol	-0.458775	0.666667	0.955001	Not Significant
C1QB_PIG	6-month protocol vs 3-month protocol	-0.459	0.266667	0.906667	Not Significant
APOE_PAPAN	6-month protocol vs 3-month protocol	-0.45912	0.383333	0.933674	Not Significant
PTBP3_PIG	6-month protocol vs 3-month protocol	-0.459141	0.266667	0.906667	Not Significant
APOA4_PAPAN	6-month protocol vs 3-month protocol	-0.459296	0.666667	0.955001	Not Significant
MYL3_PAPAN	6-month protocol vs 3-month protocol	-0.460149	0.516667	0.946938	Not Significant
PIPOX_PAPAN	6-month protocol vs 3-month protocol	-0.460511	0.183333	0.882755	Not Significant
PCYOX1_PAPAN	6-month protocol vs 3-month protocol	-0.460697	0.266667	0.906667	Not Significant
SEPTIN9_PAPAN	6-month protocol vs 3-month protocol	-0.461009	0.666667	0.955001	Not Significant
GC_PAPAN	6-month protocol vs 3-month protocol	-0.46112	0.266667	0.906667	Not Significant
SFN_PIG	6-month protocol vs 3-month protocol	-0.46322	0.666667	0.955001	Not Significant
DTYMK_PAPAN	6-month protocol vs 3-month protocol	-0.463858	0.116667	0.81325	Not Significant
SOD3_PAPAN	6-month protocol vs 3-month protocol	-0.464236	0.383333	0.933674	Not Significant
IGLV3-27_PAPAN	6-month protocol vs 3-month protocol	-0.464261	0.383333	0.933674	Not Significant
CDC42BPB_PIG	6-month protocol vs 3-month protocol	-0.465	0.383333	0.933674	Not Significant
RNF39_PAPAN	6-month protocol vs 3-month protocol	-0.465819	0.116667	0.81325	Not Significant
PLOD1_PAPAN	6-month protocol vs 3-month protocol	-0.465949	0.266667	0.906667	Not Significant
SNX6_PIG	6-month protocol vs 3-month protocol	-0.466106	0.183333	0.882755	Not Significant
DTD1_PIG	6-month protocol vs 3-month protocol	-0.466716	0.266667	0.906667	Not Significant
SERPINF1_PAPAN	6-month protocol vs 3-month protocol	-0.467056	0.266667	0.906667	Not Significant
SRP68_PAPAN	6-month protocol vs 3-month protocol	-0.468965	0.833333	0.990959	Not Significant
BLMH_PAPAN	6-month protocol vs 3-month protocol	-0.471185	0.666667	0.955001	Not Significant
SAA4_PAPAN	6-month protocol vs 3-month protocol	-0.472747	0.516667	0.946938	Not Significant
KARS1_PAPAN	6-month protocol vs 3-month protocol	-0.473292	0.666667	0.955001	Not Significant
PFKL_PAPAN	6-month protocol vs 3-month protocol	-0.474412	0.0666667	0.745414	Not Significant
DLST_PAPAN	6-month protocol vs 3-month protocol	-0.475354	0.116667	0.81325	Not Significant
ERP29_PAPAN	6-month protocol vs 3-month protocol	-0.479202	0.116667	0.81325	Not Significant
CYB5R2_PAPAN	6-month protocol vs 3-month protocol	-0.479719	0.383333	0.933674	Not Significant
FGFBP2_PAPAN	6-month protocol vs 3-month protocol	-0.480422	0.383333	0.933674	Not Significant
RIPOR3_PAPAN	6-month protocol vs 3-month protocol	-0.481729	0.383333	0.933674	Not Significant
NQO2_PAPAN	6-month protocol vs 3-month protocol	-0.483756	0.516667	0.946938	Not Significant
FDFT1_PAPAN	6-month protocol vs 3-month protocol	-0.484672	0.266667	0.906667	Not Significant
PSMD4_PIG	6-month protocol vs 3-month protocol	-0.485541	0.116667	0.81325	Not Significant
MYBPC1_PAPAN	6-month protocol vs 3-month protocol	-0.486753	0.516667	0.946938	Not Significant
CARKD_PAPAN	6-month protocol vs 3-month protocol	-0.488976	0.383333	0.933674	Not Significant
KRT82_PAPAN	6-month protocol vs 3-month protocol	-0.489059	0.183333	0.882755	Not Significant
MMP3_PAPAN	6-month protocol vs 3-month protocol	-0.491084	0.383333	0.933674	Not Significant
BTD_PAPAN	6-month protocol vs 3-month protocol	-0.491339	0.116667	0.81325	Not Significant
CPT2_PAPAN	6-month protocol vs 3-month protocol	-0.494026	0.183333	0.882755	Not Significant
ALAD_PAPAN	6-month protocol vs 3-month protocol	-0.494856	0.383333	0.933674	Not Significant
MMP1_PAPAN	6-month protocol vs 3-month protocol	-0.495397	0.266667	0.906667	Not Significant
PREP_PAPAN	6-month protocol vs 3-month protocol	-0.496436	0.383333	0.933674	Not Significant
ENOPH1_PAPAN	6-month protocol vs 3-month protocol	-0.496464	0.183333	0.882755	Not Significant
CLSTN1_PAPAN	6-month protocol vs 3-month protocol	-0.497034	0.666667	0.955001	Not Significant
APCS_PAPAN	6-month protocol vs 3-month protocol	-0.497564	0.666667	0.955001	Not Significant
[truncated: 366 more rows]
