# Supplementary material for: Integrated Molecular Profiling of Preclinical and Clinical Cardiac Xenotransplants
Source: Research Square preprint supplement (doi:10.21203/rs.3.rs-8406985/v1), 2026-02-04
Supplement: Supplementary file 11 [file 48f8e715170f32d1953b63ed.xlsx]

## Sheet: Sheet1
sample	cell_state	count	proportion	percentage
xHTx patient 1	CD4T_effector	9	0.138462	13.8462
xHTx patient 1	CD4T_naive	14	0.215385	21.5385
xHTx patient 1	CD4T_reg	6	0.0923077	9.23077
xHTx patient 1	CD8T_effector	1	0.0153846	1.53846
xHTx patient 1	CD8T_effector_early	1	0.0153846	1.53846
xHTx patient 1	CD8T_em	11	0.169231	16.9231
xHTx patient 1	CD8T_naive	2	0.0307692	3.07692
xHTx patient 1	NK	11	0.169231	16.9231
xHTx patient 1	Prolif_lymphoid	10	0.153846	15.3846
xHTx patient 2	CD4T_effector	102	0.157895	15.7895
xHTx patient 2	CD4T_naive	44	0.0681115	6.81115
xHTx patient 2	CD4T_reg	56	0.0866873	8.66873
xHTx patient 2	CD8T_effector	33	0.0510836	5.10836
xHTx patient 2	CD8T_effector_early	53	0.0820433	8.20433
xHTx patient 2	CD8T_em	157	0.243034	24.3034
xHTx patient 2	CD8T_naive	132	0.204334	20.4334
xHTx patient 2	NK	27	0.0417957	4.17957
xHTx patient 2	Prolif_lymphoid	42	0.0650155	6.50155
