# Supplementary material for: Integrated Molecular Profiling of Preclinical and Clinical Cardiac Xenotransplants
Source: Research Square preprint supplement (doi:10.21203/rs.3.rs-8406985/v1), 2026-02-04
Supplement: Supplementary file 12 [file 54d1d5fd33dd5e4719129607.xlsx]

## Sheet: CM
gene	Species	p_val	avg_log2FC	pct. 1	pct.2	p_val_adj	level
ANKRD1	Pig	0	4.7962	0.99	279	0	Up-regulated
CRYAB	Pig	0	4.11272	876	0.21	0	Up-regulated
SLCO6A1	Pig	0	8.09711	669	9	0	Up-regulated
ENSSSCG00000010190	Pig	0	4.61565	742	99	0	Up-regulated
DES	Pig	0	2.85361	868	282	0	Up-regulated
ENSSSCG00000029160	Pig	0	7.76799	572	6	0	Up-regulated
HSPB1	Pig	0	3.9244	607	68	0	Up-regulated
RNF19A	Pig	0	3.09439	786	249	0	Up-regulated
P4HA1	Pig	0	3.70677	628	101	0	Up-regulated
ACTG1	Pig	0	2.4278	747	0.22	0	Up-regulated
RPP30	Pig	0	3.9543	0.59	66	0	Up-regulated
HK1	Pig	0	2.47386	0.74	218	0	Up-regulated
SERPINE1	Pig	0	8.54649	528	6	0	Up-regulated
EIF2AK2	Pig	0	6.46455	532	17	0	Up-regulated
ENSSSCG00000033786	Pig	0	3.94715	579	75	0	Up-regulated
FBXO39	Pig	0	5.47256	519	0.02	0	Up-regulated
NPPB	Pig	0	14.7517	492	0	0	Up-regulated
LIMCH1	Pig	0	3.07031	613	122	0	Up-regulated
CD44	Pig	0	3.87422	547	69	0	Up-regulated
MAP1B	Pig	0	2.43558	711	235	0	Up-regulated
CDC14A	Pig	0	3.12957	0.64	165	0	Up-regulated
BMPR1B	Pig	0	3.9014	0.52	46	0	Up-regulated
NEDD4L	Pig	0	2.26933	815	344	0	Up-regulated
XIAP	Pig	0	2.24256	695	226	0	Up-regulated
SLC25A13	Pig	0	2.17202	683	216	0	Up-regulated
STAT1	Pig	0	4.15839	518	62	0	Up-regulated
ASAP1	Pig	0	2.83078	593	138	0	Up-regulated
SNX24	Pig	0	3.19988	0.54	88	0	Up-regulated
BAG3	Pig	0	2.5055	613	161	0	Up-regulated
RBMS1	Pig	0	2.23579	716	268	0	Up-regulated
MKLN1	Pig	0	2.21475	827	379	0	Up-regulated
SNAPC1	Pig	0	3.43278	0.54	96	0	Up-regulated
TSC22D1	Pig	0	3.75856	506	63	0	Up-regulated
MEMO1	Pig	0	2.12232	645	204	0	Up-regulated
RNF115	Pig	0	2.23665	649	211	0	Up-regulated
ENSSSCG00000049691	Pig	0	3.29259	525	88	0	Up-regulated
GAPDH	Pig	0	2.31595	694	259	0	Up-regulated
IFI44	Pig	0	13.6978	432	0	0	Up-regulated
PPFIA4	Pig	0	2.09338	643	214	0	Up-regulated
MAGI1	Pig	0	1.9723	665	237	0	Up-regulated
LMNTD1	Pig	0	1.91264	0.66	234	0	Up-regulated
KCNMA1	Pig	0	2.00438	644	0.22	0	Up-regulated
B2M	Pig	0	7.58045	426	4	0	Up-regulated
DPY19L1	Pig	0	2.47215	0.57	149	0	Up-regulated
SSBP2	Pig	0	2.42412	916	496	0	Up-regulated
ITGAV	Pig	0	2.09813	645	225	0	Up-regulated
RGS7	Pig	0	1.45914	725	308	0	Up-regulated
ITGB8	Pig	0	2.52148	0.58	163	0	Up-regulated
VCL	Pig	0	1.85867	859	444	0	Up-regulated
XIRP2	Pig	0	4.76822	468	54	0	Up-regulated
ASCC3	Pig	0	2.00586	607	194	0	Up-regulated
NUFIP2	Pig	0	2.3147	0.56	148	0	Up-regulated
EIF4G3	Pig	0	1.84774	831	419	0	Up-regulated
HSPB8	Pig	0	2.1696	0.61	202	0	Up-regulated
ENSSSCG00000010440	Pig	0	2.98659	516	0.11	0	Up-regulated
IFI44L	Pig	0	8.15023	0.41	5	0	Up-regulated
CTNND1	Pig	0	2.19587	575	0.17	0	Up-regulated
NCAM1	Pig	0	2.65758	945	541	0	Up-regulated
PICALM	Pig	0	2.13593	696	293	0	Up-regulated
TSC22D2	Pig	0	1.79349	0.72	319	0	Up-regulated
ENO1	Pig	0	2.32266	538	141	0	Up-regulated
SCAF8	Pig	0	1.70403	771	375	0	Up-regulated
MTPN	Pig	0	2.52056	535	139	0	Up-regulated
ERO1A	Pig	0	3.36788	528	135	0	Up-regulated
CCDC85A	Pig	0	2.28458	641	248	0	Up-regulated
SRPK2	Pig	0	1.60708	789	398	0	Up-regulated
TTC14	Pig	0	1.9653	0.59	201	0	Up-regulated
DDX5	Pig	0	2.02721	824	435	0	Up-regulated
CSRP3	Pig	0	2.14251	705	317	0	Up-regulated
XPR1	Pig	0	2.15688	0.59	203	0	Up-regulated
EGLN3	Pig	0	3.20791	443	57	0	Up-regulated
PPFIA2	Pig	0	2.75163	0.5	114	0	Up-regulated
GRIA1	Pig	0	2.76879	504	118	0	Up-regulated
ATAD1	Pig	0	1.6896	784	399	0	Up-regulated
KLHL32	Pig	0	2.24527	518	136	0	Up-regulated
1 COP	Pig	0	2.09367	559	0.18	0	Up-regulated
CRACDL	Pig	0	2.28076	478	0.1	0	Up-regulated
ISG12(A)	Pig	0	13.5481	378	0	0	Up-regulated
HIF1A	Pig	0	2.68074	485	109	0	Up-regulated
ACTB	Pig	0	2.92564	439	64	0	Up-regulated
CHIC2	Pig	0	2.40083	517	143	0	Up-regulated
ENSSSCG00000004207	Pig	0	2.62769	564	191	0	Up-regulated
ENSSSCG00000034570	Pig	0	13.7891	367	0	0	Up-regulated
SYNPO2L	Pig	0	2.43634	451	84	0	Up-regulated
DDIT4	Pig	0	5.16532	394	29	0	Up-regulated
USP25	Pig	0	1.7148	837	478	0	Up-regulated
WSB1	Pig	0	2.84328	474	117	0	Up-regulated
HECTD4	Pig	0	1.47767	0.8	449	0	Up-regulated
RTN4	Pig	0	3.60754	405	57	0	Up-regulated
GLIS3	Pig	0	4.47974	374	28	0	Up-regulated
STXBP5L	Pig	0	4.37051	364	25	0	Up-regulated
ISG15	Pig	0	9.73355	339	1	0	Up-regulated
TMEM117	Pig	0	3.80374	374	36	0	Up-regulated
ENSSSCG00000001229	Pig	0	8.0211	332	1	0	Up-regulated
GDAP2	Pig	0	3.38043	384	54	0	Up-regulated
GPNMB	Pig	0	4.33082	354	29	0	Up-regulated
ADAMTS20	Pig	0	6.09573	331	12	0	Up-regulated
IFIH1	Pig	0	10.7688	305	0	0	Up-regulated
TMEM65	Pig	0	1.23897	0.85	545	0	Up-regulated
IFIT1	Pig	0	8.74977	0.3	2	0	Up-regulated
KLF6	Pig	0	5.67303	308	11	0	Up-regulated
ZDHHC14	Pig	0	8.71283	285	1	0	Up-regulated
HERC6	Pig	0	12.6129	284	0	0	Up-regulated
ANO6	Pig	0	9.3854	283	0	0	Up-regulated
HDAC9	Pig	0	1.84567	849	569	0	Up-regulated
SLCO3A1	Pig	0	1.18244	912	669	0	Up-regulated
AAK1	Pig	0	1.08618	898	665	0	Up-regulated
MBNL1	Pig	0	1.44449	891	671	0	Up-regulated
NRAP	Pig	0	1.77436	0.94	742	0	Up-regulated
PARD3B	Pig	0	1.50882	918	727	0	Up-regulated
QKI	Pig	0	1.33577	0.97	0.91	0	Up-regulated
USP34	Pig	8.90423e-307	1.41441	765	415	3.25405e-302	Up-regulated
XKR6	Pig	6.31355e-302	1.86386	571	0.18	2.30729e-297	Up-regulated
SYCP2	Pig	2.46926e-301	2.01983	515	0.14	9.02391e-297	Up-regulated
CYP20A1	Pig	6.14507e-301	1.75707	0.64	263	2.24572e-296	Up-regulated
PPP1R3C	Pig	1.16985e-299	2.97327	386	57	4.27523e-295	Up-regulated
STAC2	Pig	1.19462e-299	5.95236	279	6	4.36572e-295	Up-regulated
NRP1	Pig	5.75968e-299	1.9321	607	234	2.10487e-294	Up-regulated
SLC9A9	Pig	6.7419e-299	3.82494	328	29	2.46383e-294	Up-regulated
BACE2	Pig	1.72572e-298	2.67522	422	77	6.30666e-294	Up-regulated
ENSSSCG00000045769	Pig	5.6836e-298	9.79013	265	1	2.07707e-293	Up-regulated
RSAD2	Pig	9.12889e-298	11.6485	263	0	3.33615e-293	Up-regulated
PPP3CA	Pig	1.10932e-297	3.1568	376	57	4.05401e-293	Up-regulated
ZCCHC7	Pig	4.03544e-297	1.39922	764	419	1.47475e-292	Up-regulated
GIPC2	Pig	1.63889e-295	2.13055	568	193	5.98933e-291	Up-regulated
TMEM159	Pig	3.15295e-295	3.05717	362	45	1.15225e-290	Up-regulated
TRIM54	Pig	4.30423e-295	1.97353	0.66	289	1.57298e-290	Up-regulated
GK5	Pig	1.66329e-293	4.99456	0.3	18	6.07848e-289	Up-regulated
PTP4A2	Pig	7.90866e-293	1.50336	738	365	2.89022e-288	Up-regulated
EXOC6B	Pig	1.16255e-292	1.11929	859	593	4.24853e-288	Up-regulated
OAS2	Pig	1.59288e-292	7.61331	263	2	5.82116e-288	Up-regulated
ENSSSCG00000033262	Pig	3.87177e-292	4.73643	281	9	1.41494e-287	Up-regulated
VMP1	Pig	1.0586e-291	2.22267	515	0.15	3.86865e-287	Up-regulated
PTGER3	Pig	3.42144e-290	1.35085	841	623	1.25037e-285	Up-regulated
TSPAN15	Pig	5.72513e-288	4.16239	324	32	2.09225e-283	Up-regulated
HSD17B12	Pig	1.02269e-286	2.31043	446	97	3.73742e-282	Up-regulated
TESC	Pig	4.1287e-286	1.91665	555	178	1.50883e-281	Up-regulated
MACROD2	Pig	6.39868e-286	4.53915	0.33	39	2.3384e-281	Up-regulated
RNLS	Pig	8.91352e-285	2.86536	378	59	3.25745e-280	Up-regulated
SLC35A1	Pig	2.34222e-283	2.32407	448	101	8.55964e-279	Up-regulated
SLCO4C1	Pig	5.60002e-283	12.8023	251	0	2.04653e-278	Up-regulated
LHFPL6	Pig	1.111e-281	2.39149	0.47	125	4.06017e-277	Up-regulated
REXO2	Pig	5.80076e-281	3.54895	333	38	2.11989e-276	Up-regulated
CACNA2D3	Pig	2.28608e-280	2.66414	0.41	83	8.35447e-276	Up-regulated
MYL3	Pig	3.29123e-280	1.73784	0.65	297	1.20278e-275	Up-regulated
UTRN	Pig	4.56219e-277	1.42901	737	429	1.66725e-272	Up-regulated
PLOD2	Pig	1.35975e-276	3.94754	0.38	73	4.96921e-272	Up-regulated
RASAL2	Pig	2.33501e-274	2.60018	409	86	8.5333e-270	Up-regulated
STRADB	Pig	5.04067e-274	1.35621	732	388	1.84211e-269	Up-regulated
GADD45G	Pig	2.07154e-273	2.15328	485	134	7.57045e-269	Up-regulated
CPEB4	Pig	5.5995e-273	1.11404	842	0.57	2.04634e-268	Up-regulated
ITGB1	Pig	1.99965e-272	1.60455	0.67	301	7.30774e-268	Up-regulated
ANKRD12	Pig	1.45507e-271	1.39886	0.74	407	5.31757e-267	Up-regulated
DNAJB4	Pig	4.51616e-271	1.14029	878	648	1.65043e-266	Up-regulated
HECTD2	Pig	5.03592e-271	4.12242	292	22	1.84038e-266	Up-regulated
CALD1	Pig	1.67848e-270	1.79425	599	233	6.13402e-266	Up-regulated
ENSSSCG00000009341	Pig	2.23592e-270	1.26015	784	438	8.17116e-266	Up-regulated
CDIN1	Pig	2.96829e-270	1.86294	538	173	1.08476e-265	Up-regulated
ZCCHC24	Pig	7.58629e-270	2.26666	469	126	2.77241e-265	Up-regulated
OLA1	Pig	1.17475e-269	2.52141	388	0.07	4.29314e-265	Up-regulated
VPS13B	Pig	1.09298e-268	1.35335	734	407	3.99429e-264	Up-regulated
ROBO1	Pig	1.06943e-266	5.38171	279	19	3.90824e-262	Up-regulated
ADGRG6	Pig	1.54205e-266	12.3876	238	0	5.63542e-262	Up-regulated
MGAT5	Pig	6.17588e-264	1.35805	808	514	2.25698e-259	Up-regulated
SPRED1	Pig	1.58834e-262	2.67429	373	68	5.80459e-258	Up-regulated
ACAP2	Pig	3.27963e-262	2.17314	519	174	1.19854e-257	Up-regulated
DYSF	Pig	6.85121e-261	1.69988	604	236	2.50377e-256	Up-regulated
PARP12	Pig	3.53937e-260	8.48823	235	1	1.29346e-255	Up-regulated
TPM1	Pig	9.09941e-259	1.104	863	651	3.32538e-254	Up-regulated
LMOD2	Pig	1.32596e-257	1.17198	842	567	4.84573e-253	Up-regulated
RBPJ	Pig	1.86948e-257	2.51225	378	74	6.83203e-253	Up-regulated
TASOR	Pig	1.88269e-257	2.71022	367	66	6.88029e-253	Up-regulated
CYFIP2	Pig	1.12548e-256	3.88972	283	22	4.11305e-252	Up-regulated
GBE1	Pig	1.04482e-250	1.5536	834	651	3.8183e-246	Up-regulated
RANBP17	Pig	3.5603e-250	3.14663	327	49	1.30111e-245	Up-regulated
PHKB	Pig	4.11371e-250	1.54857	651	298	1.50336e-245	Up-regulated
PAG1	Pig	2.2198e-248	1.87074	519	171	8.11226e-244	Up-regulated
PHF14	Pig	4.2268e-248	1.85629	0.51	165	1.54468e-243	Up-regulated
FNDC3B	Pig	1.0851e-247	0.866134	908	771	3.9655e-243	Up-regulated
BMP1	Pig	2.75168e-246	4.39697	261	16	1.0056e-241	Up-regulated
ENSSSCG00000017164	Pig	1.50161e-245	3.73573	291	31	5.48762e-241	Up-regulated
ZNF654	Pig	4.04635e-245	1.22443	795	504	1.47874e-240	Up-regulated
PEAK1	Pig	9.11456e-244	1.30878	0.71	378	3.33091e-239	Up-regulated
DDX60	Pig	1.7788e-242	7.54322	222	2	6.50064e-238	Up-regulated
INTS6	Pig	2.00237e-242	2.46808	384	84	7.31767e-238	Up-regulated
MX1	Pig	7.18648e-242	10.1675	218	0	2.6263e-237	Up-regulated
DZIP3	Pig	1.24821e-241	1.77211	492	154	4.56159e-237	Up-regulated
UBC	Pig	3.08112e-241	2.27665	408	96	1.126e-236	Up-regulated
ENSSSCG00000000530	Pig	5.18384e-241	1.25073	797	512	1.89444e-236	Up-regulated
SS18	Pig	8.92344e-241	1.74198	0.56	217	3.26107e-236	Up-regulated
TMEM245	Pig	1.11865e-240	1.33606	751	444	4.0881e-236	Up-regulated
RAP1A	Pig	1.87538e-239	1.29977	742	411	6.85356e-235	Up-regulated
AEBP2	Pig	7.79233e-239	1.87418	553	216	2.84771e-234	Up-regulated
MRTFA	Pig	2.09915e-238	2.44794	379	82	7.67135e-234	Up-regulated
NBEA	Pig	1.30842e-236	1.57022	641	0.31	4.78164e-232	Up-regulated
MCF2L2	Pig	1.77313e-236	4.57445	247	14	6.47992e-232	Up-regulated
LONRF3	Pig	7.33797e-236	7.12259	219	2	2.68166e-231	Up-regulated
TCF12	Pig	2.20306e-235	0.898075	868	683	8.05109e-231	Up-regulated
UCK2	Pig	8.4654e-235	1.93401	442	0.12	3.09368e-230	Up-regulated
PELI2	Pig	2.56739e-233	5.57701	225	5	9.38252e-229	Up-regulated
KDM4C	Pig	7.73968e-233	1.32342	704	371	2.82847e-228	Up-regulated
LGALS1	Pig	9.5366e-233	10.5983	211	0	3.48515e-228	Up-regulated
FGFR1OP2	Pig	3.46244e-232	2.56952	336	58	1.26535e-227	Up-regulated
SAMD12	Pig	6.41004e-232	1.21192	824	579	2.34255e-227	Up-regulated
PURG	Pig	1.36506e-230	3.05826	322	54	4.9886e-226	Up-regulated
RIMS1	Pig	2.45824e-230	1.34941	719	414	8.98365e-226	Up-regulated
UBR1	Pig	5.41566e-230	1.49978	611	266	1.97915e-225	Up-regulated
ENSSSCG00000017146	Pig	1.34772e-229	3.86005	273	29	4.92526e-225	Up-regulated
LHFPL2	Pig	4.05881e-229	2.61203	367	82	1.48329e-224	Up-regulated
RPL31	Pig	1.50947e-228	3.49153	277	31	5.51635e-224	Up-regulated
NPAS3	Pig	4.2506e-228	3.37423	312	51	1.55338e-223	Up-regulated
CPNE1	Pig	1.0904e-227	1.83495	494	165	3.98487e-223	Up-regulated
UBB	Pig	3.44288e-227	4.17845	253	0.02	1.2582e-222	Up-regulated
HK2	Pig	4.20653e-227	3.84193	261	23	1.53728e-222	Up-regulated
TXNRD1	Pig	1.33971e-225	2.08233	421	114	4.89598e-221	Up-regulated
FCHSD2	Pig	5.643e-225	1.71277	529	202	2.06224e-220	Up-regulated
RPLP1	Pig	6.72095e-223	4.61605	233	13	2.45617e-218	Up-regulated
RPS15	Pig	8.95987e-223	2.96001	302	46	3.27438e-218	Up-regulated
ABHD6	Pig	1.01454e-222	2.52283	334	61	3.70763e-218	Up-regulated
MRPS9	Pig	5.41411e-222	1.80321	0.45	132	1.97859e-217	Up-regulated
CMAS	Pig	3.03516e-221	4.56851	231	12	1.1092e-216	Up-regulated
ENSSSCG00000022032	Pig	4.43909e-221	2.38737	353	73	1.62227e-216	Up-regulated
STX12	Pig	1.28412e-220	2.39744	375	89	4.69283e-216	Up-regulated
ENSSSCG00000007692	Pig	3.20672e-220	2.21162	363	79	1.1719e-215	Up-regulated
BHLHE40	Pig	4.65455e-220	4.75451	0.22	7	1.701e-215	Up-regulated
C2CD6	Pig	2.17216e-219	2.71613	316	54	7.93816e-215	Up-regulated
DNAJB1	Pig	1.3644e-218	3.32064	272	31	4.98619e-214	Up-regulated
RSRC1	Pig	3.42665e-218	1.8685	455	146	1.25227e-213	Up-regulated
POPDC2	Pig	4.29838e-218	2.71559	303	46	1.57084e-213	Up-regulated
FLT1	Pig	1.69428e-216	6.10863	203	2	6.19176e-212	Up-regulated
KDM3A	Pig	2.30844e-216	1.80312	471	156	8.43619e-212	Up-regulated
ENSSSCG00000003079	Pig	3.17929e-216	7.91796	202	2	1.16187e-211	Up-regulated
DYNC1I1	Pig	7.1731e-215	1.06668	822	563	2.62141e-210	Up-regulated
NFKB1	Pig	2.36301e-214	1.48804	594	259	8.63561e-210	Up-regulated
DIAPH2	Pig	7.33982e-214	0.774506	926	866	2.68234e-209	Up-regulated
PRR16	Pig	4.00742e-212	1.09679	794	501	1.46451e-207	Up-regulated
TTLL11	Pig	9.64253e-212	2.84754	283	39	3.52386e-207	Up-regulated
RAB3B	Pig	2.3622e-211	7.13283	197	2	8.63266e-207	Up-regulated
TMEM260	Pig	9.46183e-211	2.05507	407	114	3.45783e-206	Up-regulated
UVRAG	Pig	1.5099e-210	1.29613	731	451	5.51792e-206	Up-regulated
GJA1	Pig	1.81527e-210	1.31712	687	368	6.63389e-206	Up-regulated
PDK1	Pig	4.99683e-210	1.89891	411	117	1.82609e-205	Up-regulated
PLPP1	Pig	2.7335e-209	1.30066	723	434	9.98956e-205	Up-regulated
ATP2B4	Pig	3.552e-209	1.16071	718	377	1.29808e-204	Up-regulated
MYL2	Pig	8.14613e-209	1.95656	747	548	2.977e-204	Up-regulated
ARFIP1	Pig	2.21739e-208	1.47276	563	233	8.10346e-204	Up-regulated
SEPTIN8	Pig	2.34146e-208	3.19848	0.26	29	8.55686e-204	Up-regulated
AOPEP	Pig	2.55397e-208	0.702219	942	874	9.33347e-204	Up-regulated
PGGT1B	Pig	2.91821e-208	1.85086	0.49	179	1.06646e-203	Up-regulated
AGPS	Pig	4.96489e-208	1.54697	503	0.18	1.81442e-203	Up-regulated
VTI1A	Pig	1.12078e-207	1.41736	583	0.25	4.09587e-203	Up-regulated
FYN	Pig	7.99527e-207	2.59374	0.32	65	2.92187e-202	Up-regulated
NNT	Pig	3.60352e-206	1.12633	0.7	381	1.31691e-201	Up-regulated
BTBD1	Pig	4.13135e-205	1.4194	579	0.25	1.5098e-200	Up-regulated
GNAQ	Pig	2.3968e-203	2.12268	387	111	8.75909e-199	Up-regulated
PSMD14	Pig	8.86396e-203	1.62169	452	145	3.23933e-198	Up-regulated
SLC1A2	Pig	9.20253e-203	1.72623	456	0.15	3.36306e-198	Up-regulated
CCN2	Pig	1.45543e-202	7.15537	192	3	5.31885e-198	Up-regulated
VCAN	Pig	4.18747e-202	1.78382	427	133	1.53031e-197	Up-regulated
KLF7	Pig	4.50343e-202	3.65437	235	21	1.64578e-197	Up-regulated
TMCC1	Pig	9.01441e-202	1.06699	792	0.52	3.29432e-197	Up-regulated
DENND5B	Pig	1.6405e-201	0.893589	919	746	5.99522e-197	Up-regulated
SORBS2	Pig	3.00952e-201	0.611841	977	976	1.09983e-196	Up-regulated
CDC42BPA	Pig	4.00848e-201	1.17628	701	401	1.4649e-196	Up-regulated
RUBCN	Pig	4.83923e-201	1.95898	369	0.09	1.7685e-196	Up-regulated
HNRNPDL	Pig	1.91827e-200	1.49499	536	217	7.01032e-196	Up-regulated
STK3	Pig	4.23291e-200	1.47272	574	263	1.54692e-195	Up-regulated
GALNT1	Pig	9.8559e-200	3.06659	262	36	3.60184e-195	Up-regulated
CALU	Pig	1.2106e-199	1.78822	452	152	4.42414e-195	Up-regulated
ENSSSCG00000013366	Pig	1.06439e-198	6.40458	189	3	3.88983e-194	Up-regulated
SPI1	Pig	3.65808e-198	3.85346	233	21	1.33685e-193	Up-regulated
SMPX	Pig	5.59608e-198	1.39919	557	232	2.04509e-193	Up-regulated
USP18	Pig	1.3805e-197	4.83715	203	9	5.04505e-193	Up-regulated
SMURF1	Pig	1.48198e-197	1.96497	0.38	101	5.41591e-193	Up-regulated
FLNC	Pig	1.96953e-197	1.5281	584	263	7.19766e-193	Up-regulated
DMD	Pig	2.0429e-196	0.605507	989	996	7.46579e-192	Up-regulated
LRRIQ3	Pig	3.86691e-196	2.19787	332	73	1.41316e-191	Up-regulated
CCSER2	Pig	7.11873e-196	1.01861	0.77	486	2.60154e-191	Up-regulated
PLAGL1	Pig	2.90894e-195	1.85939	0.48	185	1.06307e-190	Up-regulated
PLGRKT	Pig	1.40804e-194	1.51297	456	151	5.14569e-190	Up-regulated
FAM172A	Pig	2.77204e-194	1.32203	619	308	1.01304e-189	Up-regulated
CPM	Pig	3.66686e-194	5.07554	203	0.01	1.34006e-189	Up-regulated
MTR	Pig	1.57337e-193	2.83641	284	0.05	5.74987e-189	Up-regulated
PRMT3	Pig	2.97823e-193	2.04021	377	103	1.08839e-188	Up-regulated
PSME4	Pig	4.04943e-193	1.07463	842	631	1.47986e-188	Up-regulated
GCNT3	Pig	6.85155e-193	6.45745	186	4	2.5039e-188	Up-regulated
CCDC180	Pig	5.19223e-192	4.02017	215	15	1.8975e-187	Up-regulated
PCSK5	Pig	7.02002e-192	1.66686	0.52	216	2.56546e-187	Up-regulated
ZNF800	Pig	2.88711e-191	2.15695	349	85	1.05509e-186	Up-regulated
ENSSSCG00000008137	Pig	1.96657e-190	1.10294	755	459	7.18683e-186	Up-regulated
RASA1	Pig	2.76173e-189	1.38725	0.56	249	1.00927e-184	Up-regulated
CHCHD10	Pig	6.24805e-189	1.78795	428	0.14	2.28335e-184	Up-regulated
COX7C	Pig	6.8953e-189	1.55725	499	189	2.51989e-184	Up-regulated
ELOVL5	Pig	2.47893e-188	2.02834	364	97	9.05923e-184	Up-regulated
TTC23	Pig	2.55309e-188	2.01975	352	88	9.33025e-184	Up-regulated
RCOR1	Pig	1.14999e-187	1.86476	424	139	4.20264e-183	Up-regulated
NLRC5	Pig	1.85011e-187	4.74702	201	12	6.76124e-183	Up-regulated
RAD51B	Pig	5.55989e-187	1.30107	576	261	2.03186e-182	Up-regulated
ALCAM	Pig	7.76743e-187	1.80035	402	125	2.83861e-182	Up-regulated
H2AC6	Pig	1.04653e-186	4.81168	205	13	3.82453e-182	Up-regulated
TBL1XR1	Pig	9.87798e-186	1.0384	792	553	3.60991e-181	Up-regulated
TIAM2	Pig	3.01634e-184	2.28682	324	74	1.10232e-179	Up-regulated
SLMAP	Pig	3.28325e-184	0.839872	858	0.64	1.19986e-179	Up-regulated
ADK	Pig	4.992e-184	1.4709	472	173	1.82433e-179	Up-regulated
SH3RF2	Pig	1.20071e-183	4.9904	0.19	8	4.38798e-179	Up-regulated
BMP2K	Pig	4.46204e-183	2.03832	384	115	1.63065e-178	Up-regulated
HERC1	Pig	5.64255e-183	1.1567	0.72	439	2.06207e-178	Up-regulated
ENSSSCG00000014280	Pig	8.16548e-183	1.5387	476	181	2.98408e-178	Up-regulated
SEPTIN11	Pig	1.32661e-182	2.93433	265	44	4.84809e-178	Up-regulated
TUT7	Pig	2.40447e-182	2.21253	325	79	8.78713e-178	Up-regulated
ENSSSCG00000014540	Pig	5.90518e-182	2.92934	274	0.05	2.15805e-177	Up-regulated
EPS15	Pig	6.69938e-182	1.5079	496	201	2.44829e-177	Up-regulated
CDK8	Pig	1.10789e-181	1.61248	0.44	0.15	4.04877e-177	Up-regulated
CDYL2	Pig	1.8479e-181	4.65978	192	9	6.75315e-177	Up-regulated
RPL37A	Pig	2.23074e-181	3.14992	235	29	8.15224e-177	Up-regulated
STT3B	Pig	6.73976e-181	1.51462	462	0.17	2.46305e-176	Up-regulated
MYO5A	Pig	1.04074e-180	1.43694	532	227	3.80339e-176	Up-regulated
PJA2	Pig	1.49162e-180	1.20743	641	334	5.45114e-176	Up-regulated
NPPA	Pig	2.52965e-180	10.184	167	0	9.24461e-176	Up-regulated
ENSSSCG00000008451	Pig	3.0727e-180	1.22681	0.67	374	1.12292e-175	Up-regulated
FAM13A	Pig	3.96314e-180	1.36994	633	339	1.44833e-175	Up-regulated
DOCK7	Pig	7.93104e-180	1.77655	424	147	2.8984e-175	Up-regulated
BZW2	Pig	2.23099e-179	1.31319	537	231	8.15316e-175	Up-regulated
ACTR3	Pig	7.93839e-179	2.24015	329	83	2.90108e-174	Up-regulated
INPP5F	Pig	8.5986e-179	1.33059	533	221	3.14236e-174	Up-regulated
RRP15	Pig	1.78451e-178	1.77388	407	131	6.5215e-174	Up-regulated
ATP5MC1	Pig	3.25951e-178	2.14193	318	74	1.19119e-173	Up-regulated
CEP112	Pig	6.35213e-178	2.63653	301	0.07	2.32139e-173	Up-regulated
RGL1	Pig	2.54184e-177	4.91628	177	5	9.28914e-173	Up-regulated
SLC38A9	Pig	5.86664e-177	2.39943	297	64	2.14396e-172	Up-regulated
MLPH	Pig	6.35085e-177	1.3552	495	0.19	2.32092e-172	Up-regulated
IARS1	Pig	4.11173e-176	1.32798	607	311	1.50263e-171	Up-regulated
HSPB3	Pig	4.406e-176	1.87305	407	137	1.61017e-171	Up-regulated
MED13L	Pig	1.05493e-175	0.764503	859	691	3.85523e-171	Up-regulated
COL4A5	Pig	1.0586e-174	2.48773	0.26	44	3.86865e-170	Up-regulated
UBAC2	Pig	1.18442e-174	1.6471	415	137	4.32847e-170	Up-regulated
SH3D19	Pig	4.28852e-174	4.80797	173	5	1.56724e-169	Up-regulated
ENSSSCG00000036556	Pig	1.57447e-173	2.87938	233	0.03	5.75389e-169	Up-regulated
ABCD3	Pig	7.59001e-173	1.27964	499	198	2.77377e-168	Up-regulated
HEATR5B	Pig	3.22127e-172	2.07278	302	67	1.17721e-167	Up-regulated
VPS8	Pig	3.19449e-171	1.39522	523	227	1.16743e-166	Up-regulated
ZC3H6	Pig	4.11651e-171	1.70196	426	0.15	1.50438e-166	Up-regulated
CNKSR2	Pig	8.45581e-171	1.34135	0.55	255	3.09017e-166	Up-regulated
ADCY9	Pig	1.66467e-170	1.44118	0.47	177	6.08354e-166	Up-regulated
ZNF782	Pig	1.70325e-170	2.03264	0.29	0.06	6.22453e-166	Up-regulated
ENSSSCG00000031661	Pig	1.90496e-170	5.03466	0.18	9	6.96168e-166	Up-regulated
NCOA7	Pig	4.34197e-170	7.06633	162	2	1.58677e-165	Up-regulated
TANC2	Pig	4.45842e-170	2.01687	374	118	1.62933e-165	Up-regulated
DDHD1	Pig	6.57944e-170	2.26569	297	67	2.40446e-165	Up-regulated
NCOA1	Pig	3.43899e-169	1.09404	698	405	1.25678e-164	Up-regulated
ENSSSCG00000026960	Pig	8.78399e-169	1.06118	701	0.41	3.21011e-164	Up-regulated
PPP2R2A	Pig	9.92206e-169	1.39747	493	202	3.62602e-164	Up-regulated
CRYM	Pig	2.955e-167	8.24725	156	0	1.0799e-162	Up-regulated
KIAA0825	Pig	4.96924e-167	1.95917	338	93	1.81601e-162	Up-regulated
FUT8	Pig	2.4222e-166	2.81024	245	41	8.85194e-162	Up-regulated
FER	Pig	2.53597e-166	1.38924	499	214	9.2677e-162	Up-regulated
RABGAP1L	Pig	3.91925e-166	1.17258	635	352	1.43229e-161	Up-regulated
SLC44A2	Pig	1.46973e-165	3.29032	215	25	5.37113e-161	Up-regulated
DAPK3	Pig	1.61128e-165	1.75397	324	82	5.88844e-161	Up-regulated
NABP1	Pig	2.18595e-165	2.77763	241	39	7.98855e-161	Up-regulated
SYNJ1	Pig	2.85195e-165	2.07161	305	73	1.04225e-160	Up-regulated
SLC10A7	Pig	4.19453e-165	1.4886	385	0.12	1.53289e-160	Up-regulated
XPO6	Pig	4.21683e-165	1.82516	385	124	1.54104e-160	Up-regulated
TUSC3	Pig	1.17744e-164	1.51714	374	114	4.30296e-160	Up-regulated
PSMC6	Pig	1.37778e-163	1.18303	565	264	5.03508e-159	Up-regulated
PEX7	Pig	1.56762e-163	2.68955	239	38	5.72887e-159	Up-regulated
SCRN3	Pig	1.92862e-163	2.64351	229	32	7.04815e-159	Up-regulated
RPL10	Pig	4.01824e-163	2.74431	253	47	1.46847e-158	Up-regulated
MAN2A1	Pig	4.36905e-163	2.38991	0.27	56	1.59667e-158	Up-regulated
C3orf38	Pig	1.54721e-162	2.85308	241	41	5.65429e-158	Up-regulated
NBAS	Pig	2.04044e-162	1.21726	505	208	7.45678e-158	Up-regulated
GPHN	Pig	2.06146e-162	0.713688	886	746	7.5336e-158	Up-regulated
PHF21A	Pig	2.08195e-162	1.29426	539	249	7.60847e-158	Up-regulated
ACSL4	Pig	4.97532e-162	2.08461	338	99	1.81823e-157	Up-regulated
FIGN	Pig	1.20623e-161	2.20952	267	54	4.40816e-157	Up-regulated
ZNF292	Pig	1.70973e-161	1.21865	637	356	6.2482e-157	Up-regulated
SLC39A10	Pig	1.89128e-161	2.2747	297	72	6.91169e-157	Up-regulated
KTN1	Pig	8.83312e-161	1.11816	647	354	3.22806e-156	Up-regulated
BMPR2	Pig	3.38301e-160	1.10021	655	0.35	1.23632e-155	Up-regulated
WDFY2	Pig	4.79275e-160	2.22751	314	84	1.75151e-155	Up-regulated
1,00 PGK	Pig	7.52357e-160	2.59944	0.23	35	2.74949e-155	Up-regulated
IL10RA	Pig	8.41515e-160	4.97722	169	8	3.07532e-155	Up-regulated
IFIT5	Pig	1.32858e-159	4.12823	186	16	4.85531e-155	Up-regulated
MMD	Pig	1.61544e-159	1.3674	503	222	5.90363e-155	Up-regulated
ENSSSCG00000036227	Pig	1.6986e-159	1.77741	362	114	6.20754e-155	Up-regulated
MTHFD2L	Pig	2.7064e-159	1.21411	0.51	222	9.89055e-155	Up-regulated
PHC3	Pig	2.77149e-159	1.11501	656	371	1.01284e-154	Up-regulated
SSR3	Pig	1.66834e-158	2.87501	229	36	6.09693e-154	Up-regulated
AK4	Pig	1.87213e-158	8.33643	148	0	6.84169e-154	Up-regulated
ENSSSCG00000000145	Pig	2.20823e-158	1.14327	598	293	8.06996e-154	Up-regulated
MAML2	Pig	2.50034e-158	2.34262	314	88	9.13749e-154	Up-regulated
ENSSSCG00000017791	Pig	6.54322e-158	2.86369	236	0.04	2.39122e-153	Up-regulated
IGFBP2	Pig	6.70121e-158	8.34885	147	0	2.44896e-153	Up-regulated
BBX	Pig	6.77305e-158	1.44728	473	199	2.47521e-153	Up-regulated
VPS13A	Pig	8.90247e-158	1.48265	449	178	3.25341e-153	Up-regulated
ENSSSCG00000039582	Pig	5.53767e-157	2.35365	259	52	2.02374e-152	Up-regulated
DLG1	Pig	1.06969e-156	0.889337	779	543	3.9092e-152	Up-regulated
KSR1	Pig	5.18087e-156	3.60656	191	19	1.89335e-151	Up-regulated
MGAT4A	Pig	6.05335e-156	1.87901	362	118	2.2122e-151	Up-regulated
ST3GAL6	Pig	1.13209e-155	2.28681	258	52	4.13721e-151	Up-regulated
ORC4	Pig	5.20863e-155	1.21082	554	266	1.90349e-150	Up-regulated
EML4	Pig	7.35905e-155	1.86067	324	92	2.68936e-150	Up-regulated
OSTF1	Pig	8.1194e-155	2.77825	219	32	2.96723e-150	Up-regulated
ELOVL6	Pig	1.08574e-154	1.8296	277	61	3.96784e-150	Up-regulated
RAP1B	Pig	1.26267e-154	1.48262	442	175	4.61442e-150	Up-regulated
ARHGEF2	Pig	8.74642e-154	2.75721	251	0.05	3.19638e-149	Up-regulated
ABLIM2	Pig	9.58903e-154	1.09463	511	0.22	3.50431e-149	Up-regulated
ARL13B	Pig	1.43369e-153	1.53109	382	127	5.23944e-149	Up-regulated
ENSSSCG00000035751	Pig	1.57012e-153	1.1724	589	314	5.73801e-149	Up-regulated
TXNIP	Pig	2.1105e-153	1.56558	459	202	7.71283e-149	Up-regulated
FOCAD	Pig	2.81415e-153	1.49667	413	153	1.02843e-148	Up-regulated
PDCD4	Pig	3.19876e-153	3.08334	228	39	1.16899e-148	Up-regulated
ARHGEF28	Pig	4.18003e-152	0.942749	811	616	1.52759e-147	Up-regulated
USP15	Pig	4.34028e-152	1.12972	588	301	1.58616e-147	Up-regulated
AP3B1	Pig	6.7638e-152	1.4303	441	175	2.47183e-147	Up-regulated
ADGRL2	Pig	1.86579e-151	1.51636	418	161	6.81852e-147	Up-regulated
TGM2	Pig	2.28388e-151	1.12639	492	206	8.34642e-147	Up-regulated
UBAP1	Pig	5.34139e-151	1.35262	501	225	1.95201e-146	Up-regulated
KIFAP3	Pig	1.29164e-150	1.66616	0.33	96	4.72029e-146	Up-regulated
CLIP1	Pig	2.3027e-150	0.887449	793	0.54	8.41523e-146	Up-regulated
KCNN2	Pig	2.90695e-150	1.03933	0.67	403	1.06234e-145	Up-regulated
WDR70	Pig	5.2318e-150	1.29375	474	198	1.91196e-145	Up-regulated
NDUFA4	Pig	9.0327e-150	1.33769	0.53	248	3.301e-145	Up-regulated
TTC3	Pig	3.48005e-149	1.34873	457	186	1.27178e-144	Up-regulated
AP5M1	Pig	3.51423e-149	1.58109	316	86	1.28428e-144	Up-regulated
ANKRD2	Pig	6.02576e-149	5.47862	148	3	2.20211e-144	Up-regulated
ZMYND8	Pig	1.15368e-148	1.38689	431	165	4.21612e-144	Up-regulated
CCNB1IP1	Pig	4.77086e-148	2.11215	0.23	39	1.74351e-143	Up-regulated
MLLT11	Pig	4.89034e-148	3.17777	184	19	1.78717e-143	Up-regulated
CD274	Pig	7.52193e-148	2.40874	229	0.04	2.74889e-143	Up-regulated
FRZB	Pig	1.05098e-147	5.48137	0.15	5	3.84079e-143	Up-regulated
SEC61G	Pig	2.29331e-147	2.44759	236	44	8.3809e-143	Up-regulated
MDH1	Pig	3.10502e-147	1.10054	468	189	1.13473e-142	Up-regulated
VPS13C	Pig	3.74624e-147	1.20251	527	247	1.36906e-142	Up-regulated
EPB41L1	Pig	8.31666e-147	1.38963	382	0.13	3.03932e-142	Up-regulated
TLCD4	Pig	1.04261e-146	1.14627	599	314	3.81021e-142	Up-regulated
NHS	Pig	1.25631e-146	7.20911	0.14	1	4.59117e-142	Up-regulated
TECTA	Pig	2.89668e-146	1.81197	303	81	1.05859e-141	Up-regulated
SNX14	Pig	3.07204e-146	1.44224	422	165	1.12268e-141	Up-regulated
CHSY1	Pig	4.41822e-146	3.89144	173	15	1.61464e-141	Up-regulated
CCDC88A	Pig	1.06261e-145	2.31441	249	53	3.8833e-141	Up-regulated
GYG1	Pig	1.3307e-145	1.74456	343	0.11	4.86306e-141	Up-regulated
MYCBP2	Pig	2.58964e-145	1.01489	655	381	9.46383e-141	Up-regulated
NPSR1	Pig	5.89027e-145	2.35301	225	39	2.1526e-140	Up-regulated
SERPINB2	Pig	6.29412e-145	3.76878	179	18	2.30018e-140	Up-regulated
CEP170	Pig	8.13837e-145	1.66853	349	114	2.97417e-140	Up-regulated
ASCC1	Pig	1.24031e-144	2.03439	285	73	4.53273e-140	Up-regulated
UBE3A	Pig	1.75107e-144	0.912915	732	475	6.39929e-140	Up-regulated
RNF217	Pig	2.20555e-144	3.06268	202	29	8.0602e-140	Up-regulated
MMP25	Pig	3.01439e-144	8.32308	136	0	1.10161e-139	Up-regulated
ERICH6	Pig	3.58664e-144	4.68367	148	5	1.31074e-139	Up-regulated
ENSSSCG00000039723	Pig	4.31081e-144	2.3062	225	39	1.57539e-139	Up-regulated
DENND2A	Pig	9.26492e-144	4.20497	173	16	3.38586e-139	Up-regulated
TMEM68	Pig	1.09708e-143	2.18004	254	55	4.00927e-139	Up-regulated
1 SOS	Pig	1.10433e-143	0.916939	733	473	4.03576e-139	Up-regulated
JAKMIP3	Pig	1.5146e-143	2.98319	179	18	5.5351e-139	Up-regulated
CSTF3	Pig	1.52142e-143	1.695	364	126	5.56002e-139	Up-regulated
STXBP5	Pig	3.29534e-143	1.58504	391	145	1.20428e-138	Up-regulated
PRELID2	Pig	3.70956e-143	3.58363	169	14	1.35566e-138	Up-regulated
CHMP4B	Pig	4.46961e-143	1.58798	348	111	1.63342e-138	Up-regulated
NUDCD1	Pig	4.53693e-143	2.02629	0.29	78	1.65802e-138	Up-regulated
SLC4A4	Pig	7.38047e-143	1.47764	439	183	2.69719e-138	Up-regulated
ENSSSCG00000009683	Pig	1.16851e-142	1.23116	505	232	4.27033e-138	Up-regulated
TNKS	Pig	1.8608e-142	0.993394	642	358	6.80031e-138	Up-regulated
DENND1A	Pig	2.23769e-142	0.97628	688	425	8.17762e-138	Up-regulated
TRIP11	Pig	1.04186e-141	1.22767	497	222	3.80749e-137	Up-regulated
MAP4K3	Pig	1.2917e-141	1.26521	467	202	4.72052e-137	Up-regulated
JAK2	Pig	2.10953e-141	1.48468	399	0.15	7.70927e-137	Up-regulated
ENSSSCG00000022925	Pig	3.95296e-141	1.72218	496	252	1.44461e-136	Up-regulated
GPR161	Pig	4.93231e-141	1.38172	477	219	1.80251e-136	Up-regulated
ENSSSCG00000013880	Pig	9.32344e-141	4.92766	146	5	3.40725e-136	Up-regulated
MMP23B	Pig	1.04292e-140	5.06798	145	5	3.81136e-136	Up-regulated
METTL15	Pig	2.76151e-140	1.5926	0.33	102	1.00919e-135	Up-regulated
LPIN1	Pig	1.14989e-139	0.971659	563	0.27	4.20226e-135	Up-regulated
PLIN2	Pig	1.18137e-139	3.26204	184	22	4.31731e-135	Up-regulated
PPM1L	Pig	2.28218e-139	1.48907	376	133	8.34023e-135	Up-regulated
SRSF12	Pig	4.60054e-139	2.74414	198	29	1.68127e-134	Up-regulated
MSANTD4	Pig	5.19812e-139	2.14142	224	0.04	1.89965e-134	Up-regulated
SERGEF	Pig	1.44148e-138	2.31537	247	55	5.2679e-134	Up-regulated
RANBP6	Pig	2.57672e-138	1.92032	292	82	9.41664e-134	Up-regulated
TBCK	Pig	3.11577e-138	1.55007	369	131	1.13866e-133	Up-regulated
MAPK9	Pig	4.73664e-138	2.12802	264	64	1.731e-133	Up-regulated
1,00 AMD	Pig	7.43027e-138	0.959852	581	296	2.71539e-133	Up-regulated
RNF144B	Pig	1.13421e-137	2.15185	258	62	4.14497e-133	Up-regulated
USP30	Pig	1.28698e-137	1.46011	342	109	4.70326e-133	Up-regulated
MAPK8	Pig	1.42253e-137	1.05734	0.51	231	5.19863e-133	Up-regulated
ENSSSCG00000011729	Pig	1.54078e-137	1.58476	326	101	5.63078e-133	Up-regulated
KIF3A	Pig	2.43941e-137	2.27571	228	44	8.91483e-133	Up-regulated
IBTK	Pig	6.62428e-137	1.05039	552	269	2.42084e-132	Up-regulated
NAALAD2	Pig	1.03125e-136	2.09491	245	55	3.7687e-132	Up-regulated
LONP2	Pig	6.15622e-136	0.955958	0.65	0.36	2.24979e-131	Up-regulated
ENSSSCG00000050955	Pig	6.51212e-136	3.03488	189	26	2.37985e-131	Up-regulated
VEGFA	Pig	7.12324e-136	1.13739	583	326	2.60319e-131	Up-regulated
DTNBP1	Pig	7.58381e-136	1.82627	303	89	2.7715e-131	Up-regulated
HLCS	Pig	8.79718e-136	2.61031	203	33	3.21493e-131	Up-regulated
APAF1	Pig	1.89952e-135	2.95034	0.19	27	6.9418e-131	Up-regulated
SMARCAD1	Pig	5.05942e-135	1.39669	351	117	1.84897e-130	Up-regulated
ARHGEF3	Pig	7.57567e-135	2.07957	295	87	2.76853e-130	Up-regulated
PUS7	Pig	9.28013e-135	1.4398	356	121	3.39142e-130	Up-regulated
SND1	Pig	3.35708e-134	1.68082	0.34	115	1.22685e-129	Up-regulated
MAP3K20	Pig	4.75961e-134	1.15555	708	469	1.7394e-129	Up-regulated
LIPA	Pig	5.41797e-134	2.2722	237	52	1.98e-129	Up-regulated
FAM162A	Pig	1.09502e-133	1.21733	432	179	4.00175e-129	Up-regulated
BNIP3	Pig	1.31578e-133	1.70552	328	108	4.80853e-129	Up-regulated
PARG	Pig	1.64544e-133	1.47188	343	114	6.01327e-129	Up-regulated
LCOR	Pig	1.71e-133	0.984396	0.62	346	6.2492e-129	Up-regulated
DMXL1	Pig	6.52935e-133	1.00513	651	382	2.38615e-128	Up-regulated
NCKAP1	Pig	9.8498e-133	0.980101	0.62	346	3.59961e-128	Up-regulated
TRAPPC13	Pig	1.14939e-132	1.54916	306	91	4.20045e-128	Up-regulated
ATP5IF1	Pig	1.17777e-132	2.93905	197	32	4.30417e-128	Up-regulated
ZNF407	Pig	1.19344e-132	1.05085	577	306	4.36141e-128	Up-regulated
ENSSSCG00000033648	Pig	1.52071e-132	3.5578	159	14	5.55744e-128	Up-regulated
SNAP91	Pig	2.56601e-132	2.69488	186	26	9.37747e-128	Up-regulated
UQCR10	Pig	3.30896e-132	2.10248	229	47	1.20926e-127	Up-regulated
MRPS30	Pig	4.76613e-132	1.88887	258	63	1.74178e-127	Up-regulated
PAFAH2	Pig	8.1553e-132	1.95826	249	57	2.98035e-127	Up-regulated
ENSSSCG00000031798	Pig	1.98863e-131	5.34372	133	4	7.26746e-127	Up-regulated
SBF2	Pig	3.06677e-131	0.801884	758	0.55	1.12075e-126	Up-regulated
AP3M1	Pig	4.91163e-131	1.2798	411	166	1.79495e-126	Up-regulated
ZMYM6	Pig	7.72922e-131	2.44237	212	0.04	2.82464e-126	Up-regulated
SETDB2	Pig	1.61583e-130	1.94326	233	0.05	5.90507e-126	Up-regulated
KLHDC1	Pig	1.64171e-130	2.24662	225	47	5.99961e-126	Up-regulated
HACE1	Pig	2.27475e-130	1.78514	283	79	8.31308e-126	Up-regulated
TIMP3	Pig	2.61615e-130	1.54514	476	233	9.56073e-126	Up-regulated
RUNDC3B	Pig	3.77338e-130	2.34304	222	45	1.37898e-125	Up-regulated
CRACR2A	Pig	5.07775e-130	1.65329	248	58	1.85566e-125	Up-regulated
MGST3	Pig	1.57115e-129	1.92628	235	52	5.74178e-125	Up-regulated
PAPOLA	Pig	1.70544e-129	1.12544	568	303	6.23251e-125	Up-regulated
ENAH	Pig	5.07751e-129	0.850842	822	623	1.85558e-124	Up-regulated
KLHL2	Pig	5.38814e-129	2.75628	189	29	1.96909e-124	Up-regulated
KRAS	Pig	5.47174e-129	3.3201	169	0.02	1.99965e-124	Up-regulated
ANKRD44	Pig	8.87183e-129	4.05169	147	0.01	3.24221e-124	Up-regulated
ARHGAP32	Pig	9.35953e-129	2.27543	255	67	3.42044e-124	Up-regulated
NR6A1	Pig	1.35319e-128	1.06061	451	191	4.94522e-124	Up-regulated
DHRS4	Pig	1.65594e-128	2.43626	199	34	6.05163e-124	Up-regulated
ERBIN	Pig	2.02726e-128	0.946723	686	435	7.40862e-124	Up-regulated
GNA12	Pig	2.29725e-128	1.3164	346	117	8.39529e-124	Up-regulated
THOC6	Pig	4.59535e-128	3.86073	147	0.01	1.67937e-123	Up-regulated
RAB1A	Pig	5.02918e-128	1.39045	376	143	1.83791e-123	Up-regulated
ARL14EP	Pig	9.91678e-128	1.24204	367	132	3.62409e-123	Up-regulated
PIGF	Pig	1.33395e-127	2.37646	199	34	4.87491e-123	Up-regulated
FLNB	Pig	1.69983e-127	6.23258	127	3	6.21204e-123	Up-regulated
ZNF664	Pig	1.83017e-127	0.951066	579	306	6.68837e-123	Up-regulated
RPL11	Pig	2.40882e-127	2.63837	191	0.03	8.80303e-123	Up-regulated
ADAR	Pig	2.7822e-127	2.57441	209	0.04	1.01676e-122	Up-regulated
SH3PXD2A	Pig	3.44999e-127	1.476	401	162	1.2608e-122	Up-regulated
HEATR3	Pig	4.03356e-127	1.24448	426	175	1.47406e-122	Up-regulated
RNGTT	Pig	5.02897e-127	1.09837	0.45	193	1.83784e-122	Up-regulated
NMNAT3	Pig	8.70643e-127	1.88002	227	49	3.18176e-122	Up-regulated
DSC2	Pig	1.05964e-126	0.915595	603	324	3.87246e-122	Up-regulated
FBXL17	Pig	1.33664e-126	0.837556	728	0.48	4.88476e-122	Up-regulated
DISP1	Pig	2.69146e-126	0.95368	599	322	9.83595e-122	Up-regulated
ENSSSCG00000043778	Pig	3.43924e-126	2.02019	231	51	1.25687e-121	Up-regulated
LZTS1	Pig	6.04835e-126	2.9532	167	19	2.21037e-121	Up-regulated
VWA8	Pig	7.45253e-126	0.839707	802	569	2.72353e-121	Up-regulated
FRMD4A	Pig	1.1953e-125	4.24999	132	5	4.36821e-121	Up-regulated
KATNBL1	Pig	3.87257e-125	1.01508	536	268	1.41523e-120	Up-regulated
DHRS11	Pig	6.06398e-125	1.6776	295	89	2.21608e-120	Up-regulated
ENSSSCG00000027348	Pig	9.26085e-125	2.75608	194	34	3.38438e-120	Up-regulated
OSBPL11	Pig	2.09316e-124	1.11506	617	362	7.64945e-120	Up-regulated
MKNK1	Pig	5.53718e-124	1.94651	0.26	0.07	2.02356e-119	Up-regulated
DPY19L3	Pig	1.21665e-123	1.97251	289	0.09	4.44623e-119	Up-regulated
SCAF11	Pig	1.57649e-123	0.932495	603	333	5.76128e-119	Up-regulated
SLC25A24	Pig	1.6858e-123	9.4531	117	0	6.16075e-119	Up-regulated
IWS1	Pig	1.73133e-123	1.37716	339	117	6.32715e-119	Up-regulated
NKAIN2	Pig	2.05275e-123	3.29136	186	31	7.50177e-119	Up-regulated
SESN2	Pig	6.8239e-123	6.22221	123	3	2.49379e-118	Up-regulated
TGFB2	Pig	1.34112e-122	4.93565	129	5	4.90112e-118	Up-regulated
USP6NL	Pig	1.60905e-122	2.01574	219	47	5.88029e-118	Up-regulated
NPTN	Pig	1.6285e-122	0.872255	633	366	5.95137e-118	Up-regulated
CAVIN2	Pig	2.79461e-122	2.24021	214	45	1.02129e-117	Up-regulated
GLS	Pig	3.3429e-122	1.22639	665	442	1.22166e-117	Up-regulated
CHD1L	Pig	3.45506e-122	1.21108	424	182	1.26265e-117	Up-regulated
SLC30A7	Pig	3.72112e-122	1.64224	278	81	1.35988e-117	Up-regulated
TMEM161B	Pig	1.00305e-121	1.06125	454	202	3.66566e-117	Up-regulated
DENND4C	Pig	1.14291e-121	1.35774	377	147	4.17677e-117	Up-regulated
MSRB3	Pig	1.18511e-121	0.523277	938	893	4.331e-117	Up-regulated
PIP4K2A	Pig	1.62989e-121	2.45752	216	48	5.95644e-117	Up-regulated
POLK	Pig	1.67539e-121	1.40581	341	122	6.12271e-117	Up-regulated
SSPN	Pig	2.15379e-121	1.3886	0.38	0.15	7.87101e-117	Up-regulated
FEZ2	Pig	2.50447e-121	3.5668	146	13	9.15259e-117	Up-regulated
ANO10	Pig	3.29989e-121	1.2077	412	171	1.20595e-116	Up-regulated
RPS20	Pig	3.74142e-121	4.1529	0.14	0.01	1.3673e-116	Up-regulated
EEA1	Pig	5.1584e-121	0.898774	561	297	1.88514e-116	Up-regulated
NRIP1	Pig	7.74615e-121	1.65449	308	104	2.83083e-116	Up-regulated
CD47	Human	8.51677e-121	1.26355	425	183	3.11245e-116	Up-regulated
GSK3B	Pig	1.39282e-120	0.7161	786	0.55	5.09005e-116	Up-regulated
GCFC2	Pig	1.66023e-120	1.47543	298	93	6.06732e-116	Up-regulated
ALG14	Pig	2.54161e-120	2.51866	185	31	9.28831e-116	Up-regulated
SETX	Pig	2.74939e-120	1.81955	281	87	1.00476e-115	Up-regulated
ENSSSCG00000013436	Pig	3.95647e-120	2.34294	219	0.05	1.44589e-115	Up-regulated
TLL2	Pig	4.41525e-120	3.93996	141	11	1.61355e-115	Up-regulated
SMAD9	Pig	4.59584e-120	2.18645	212	44	1.67955e-115	Up-regulated
CMPK2	Pig	7.66e-120	10.6972	113	0	2.79935e-115	Up-regulated
MAPT	Pig	1.64059e-119	1.31386	346	125	5.99555e-115	Up-regulated
SPTBN1	Pig	1.69159e-119	0.501292	926	868	6.18191e-115	Up-regulated
CPEB3	Pig	2.10083e-119	0.874005	724	493	7.67749e-115	Up-regulated
ENSSSCG00000002950	Pig	3.57255e-119	1.60726	343	126	1.30559e-114	Up-regulated
LTBP1	Pig	4.00224e-119	2.24263	263	0.08	1.46262e-114	Up-regulated
RCBTB1	Pig	7.46281e-119	1.38302	0.35	0.13	2.72728e-114	Up-regulated
ITIH4	Pig	2.00508e-118	8.08993	113	0	7.32755e-114	Up-regulated
HSF2	Pig	2.24769e-118	1.31179	313	104	8.2142e-114	Up-regulated
COMMD8	Pig	3.98728e-118	1.9147	214	46	1.45715e-113	Up-regulated
SPATA5	Pig	5.34149e-118	0.928566	527	264	1.95205e-113	Up-regulated
PRKCA	Pig	6.54597e-118	1.00186	0.42	177	2.39223e-113	Up-regulated
ADAM19	Pig	1.38145e-117	3.47389	154	18	5.0485e-113	Up-regulated
ENSSSCG00000008892	Pig	1.49399e-117	1.41597	295	93	5.4598e-113	Up-regulated
MAP2K1	Pig	2.45949e-117	1.49684	289	91	8.98821e-113	Up-regulated
ULK4	Pig	3.27022e-117	1.79834	279	87	1.1951e-112	Up-regulated
MIPOL1	Pig	3.61619e-117	0.969646	539	281	1.32154e-112	Up-regulated
RNF13	Pig	8.42617e-117	1.26814	421	188	3.07934e-112	Up-regulated
RPS27A	Pig	8.84166e-117	2.55194	0.19	36	3.23118e-112	Up-regulated
ENSSSCG00000024973	Pig	1.02897e-116	4.08986	132	8	3.76037e-112	Up-regulated
RSU1	Pig	1.15263e-116	1.13868	416	178	4.21229e-112	Up-regulated
PPP1R21	Pig	1.1663e-116	1.7871	258	74	4.26225e-112	Up-regulated
PKM	Pig	1.76877e-116	0.771605	0.56	291	6.46398e-112	Up-regulated
B4GALT1	Pig	2.12675e-116	1.58325	0.32	113	7.77219e-112	Up-regulated
ARL8B	Pig	2.61736e-116	1.29445	338	123	9.56512e-112	Up-regulated
MICOS13	Pig	7.81907e-116	4.42418	127	7	2.85748e-111	Up-regulated
PBX3	Pig	8.35054e-116	1.68851	0.29	96	3.0517e-111	Up-regulated
NF1	Pig	1.66973e-115	0.77638	748	531	6.10201e-111	Up-regulated
ASXL2	Pig	2.10954e-115	1.04316	0.47	218	7.70932e-111	Up-regulated
TUT4	Pig	2.39389e-115	0.700908	855	675	8.74848e-111	Up-regulated
SGCE	Pig	2.48688e-115	3.1972	155	19	9.08829e-111	Up-regulated
ZNRF3	Pig	3.48439e-115	1.37188	388	162	1.27337e-110	Up-regulated
STAU2	Pig	3.57462e-115	0.628091	822	607	1.30635e-110	Up-regulated
WDFY3	Pig	3.64755e-115	0.904188	656	415	1.333e-110	Up-regulated
FAR2	Pig	4.92841e-115	2.11392	208	45	1.80109e-110	Up-regulated
H2BC21	Pig	8.08415e-115	2.9052	149	16	2.95435e-110	Up-regulated
RPL18	Pig	9.08064e-115	2.45613	183	32	3.31852e-110	Up-regulated
IFIT2	Pig	9.56134e-115	7.72071	0.11	1	3.49419e-110	Up-regulated
HMBOX1	Pig	1.28631e-114	0.967853	555	295	4.70081e-110	Up-regulated
DNAJC1	Pig	1.29798e-114	0.82677	701	458	4.74348e-110	Up-regulated
1,00 STN	Pig	1.79065e-114	2.45556	193	38	6.54393e-110	Up-regulated
TOPAZ1	Pig	1.87804e-114	1.83188	232	59	6.86331e-110	Up-regulated
CCDC18	Pig	2.35112e-114	2.44294	186	34	8.59216e-110	Up-regulated
EXOC5	Pig	2.61986e-114	0.873228	559	297	9.57429e-110	Up-regulated
VWA5A	Pig	2.86748e-114	5.25872	119	4	1.04792e-109	Up-regulated
LRRFIP2	Pig	3.16075e-114	0.66667	874	0.76	1.15509e-109	Up-regulated
RHOB	Pig	3.5908e-114	2.95097	162	23	1.31226e-109	Up-regulated
NDFIP2	Pig	4.3675e-114	1.25444	323	113	1.5961e-109	Up-regulated
WDR7	Pig	4.82789e-114	1.09757	488	241	1.76435e-109	Up-regulated
ENSSSCG00000005959	Pig	1.12444e-113	1.28138	392	163	4.10927e-109	Up-regulated
LRCH3	Pig	1.30482e-113	0.895788	649	395	4.76845e-109	Up-regulated
ENSSSCG00000028850	Pig	1.85069e-113	4.44088	122	5	6.76336e-109	Up-regulated
CSNK1G3	Pig	2.57076e-113	1.46545	303	103	9.39485e-109	Up-regulated
CTSS	Pig	2.95068e-113	6.22322	109	1	1.07833e-108	Up-regulated
GPR176	Pig	3.58537e-113	1.45034	295	97	1.31028e-108	Up-regulated
SMAD2	Pig	6.77428e-113	1.57116	304	106	2.47566e-108	Up-regulated
NDUFA5	Pig	8.58585e-113	1.14025	343	127	3.1377e-108	Up-regulated
RAB10	Pig	1.05902e-112	0.952052	528	271	3.8702e-108	Up-regulated
ARL5A	Pig	1.19868e-112	2.99643	157	21	4.38057e-108	Up-regulated
ENSSSCG00000012202	Pig	3.19076e-112	0.96621	496	246	1.16606e-107	Up-regulated
ENSSSCG00000007735	Pig	3.28087e-112	1.43351	355	141	1.19899e-107	Up-regulated
TIPARP	Pig	4.75821e-112	1.94927	0.25	72	1.73889e-107	Up-regulated
ENSSSCG00000048263	Pig	4.87829e-112	1.19533	415	184	1.78277e-107	Up-regulated
RHOQ	Pig	5.12028e-112	1.11027	546	297	1.87121e-107	Up-regulated
RPS28	Pig	6.02719e-112	2.69596	178	32	2.20264e-107	Up-regulated
ENSSSCG00000023041	Pig	7.82604e-112	2.11167	199	43	2.86003e-107	Up-regulated
TM2D1	Pig	1.40667e-111	1.46221	267	0.08	5.14067e-107	Up-regulated
EIF3H	Pig	1.41413e-111	1.19631	354	136	5.16792e-107	Up-regulated
ZNF248	Pig	2.33563e-111	1.56627	267	81	8.53556e-107	Up-regulated
COPG2	Pig	3.72181e-111	1.51302	295	99	1.36013e-106	Up-regulated
ENSSSCG00000029830	Pig	3.83463e-111	3.04484	153	0.02	1.40136e-106	Up-regulated
DARS1	Pig	3.94106e-111	1.03566	0.45	206	1.44026e-106	Up-regulated
IQCG	Pig	7.1189e-111	2.12424	195	0.04	2.6016e-106	Up-regulated
C16orf72	Pig	7.21969e-111	1.19066	364	143	2.63844e-106	Up-regulated
RPL24	Pig	1.01653e-110	2.18536	212	51	3.71492e-106	Up-regulated
FRYL	Pig	1.27598e-110	1.15303	405	179	4.66307e-106	Up-regulated
LGR4	Pig	1.30271e-110	1.79999	304	0.11	4.76076e-106	Up-regulated
ZFYVE16	Pig	1.5066e-110	1.16089	0.39	162	5.50588e-106	Up-regulated
ARHGEF11	Pig	3.01588e-110	1.34372	358	142	1.10215e-105	Up-regulated
ENSSSCG00000023850	Pig	3.86868e-110	1.57975	226	57	1.41381e-105	Up-regulated
ACVR2A	Pig	4.18852e-110	0.984564	468	225	1.53069e-105	Up-regulated
P4HA2	Pig	5.1149e-110	1.81902	231	0.06	1.86924e-105	Up-regulated
TNNT1	Pig	5.38142e-110	1.40743	275	85	1.96664e-105	Up-regulated
TTC13	Pig	6.60809e-110	2.1922	215	52	2.41493e-105	Up-regulated
CEP63	Pig	7.57058e-110	1.14725	0.37	147	2.76667e-105	Up-regulated
TRIT1	Pig	8.19169e-110	1.45005	323	118	2.99365e-105	Up-regulated
ENSSSCG00000011237	Pig	8.4215e-110	1.1453	415	186	3.07764e-105	Up-regulated
KIZ	Pig	1.12806e-109	1.83604	225	57	4.12251e-105	Up-regulated
TCF4	Pig	1.2327e-109	1.32229	378	167	4.50491e-105	Up-regulated
TMOD3	Pig	1.41249e-109	1.47986	279	0.09	5.16193e-105	Up-regulated
TNKS2	Pig	2.27498e-109	1.26044	373	154	8.31391e-105	Up-regulated
HDGFL3	Pig	3.34618e-109	1.17889	394	169	1.22286e-104	Up-regulated
CASP10	Pig	3.35806e-109	5.70842	0.11	2	1.2272e-104	Up-regulated
HSD11B1L	Pig	7.73167e-109	2.46801	176	32	2.82554e-104	Up-regulated
PARP3	Pig	9.18339e-109	2.2786	174	0.03	3.35607e-104	Up-regulated
PIKFYVE	Pig	9.23179e-109	1.87929	0.24	68	3.37376e-104	Up-regulated
SPG11	Pig	2.14483e-108	1.89716	229	61	7.83828e-104	Up-regulated
CLCN5	Pig	2.41505e-108	3.30289	136	13	8.82579e-104	Up-regulated
VPS50	Pig	2.79816e-108	1.02282	473	229	1.02259e-103	Up-regulated
FYTTD1	Pig	3.16478e-108	1.0546	454	211	1.15657e-103	Up-regulated
MICU3	Pig	6.24873e-108	0.853052	571	316	2.2836e-103	Up-regulated
CSNK1G1	Pig	6.78785e-108	1.08666	424	191	2.48062e-103	Up-regulated
CD2AP	Pig	7.10045e-108	1.87409	0.22	56	2.59486e-103	Up-regulated
ENSSSCG00000021656	Pig	9.52759e-108	1.57251	449	235	3.48186e-103	Up-regulated
ENSSSCG00000007080	Pig	1.13024e-107	0.98777	444	203	4.13048e-103	Up-regulated
HERC5	Pig	1.48604e-107	6.23826	105	1	5.43073e-103	Up-regulated
ALDH1L2	Pig	1.5587e-107	10.2015	101	0	5.69626e-103	Up-regulated
ENSSSCG00000001038	Pig	2.86716e-107	2.24825	177	33	1.0478e-102	Up-regulated
CPNE5	Pig	3.29908e-107	3.39866	128	0.01	1.20565e-102	Up-regulated
UNC45B	Pig	3.80594e-107	1.26855	294	98	1.39088e-102	Up-regulated
ANXA5	Pig	4.11546e-107	2.53848	171	0.03	1.50399e-102	Up-regulated
ENSSSCG00000029668	Pig	9.18314e-107	3.36105	0.13	11	3.35598e-102	Up-regulated
CDK6	Pig	1.00404e-106	1.06678	652	0.45	3.66926e-102	Up-regulated
CSE1L	Pig	1.40865e-106	1.24611	352	139	5.14791e-102	Up-regulated
PTPDC1	Pig	1.47203e-106	2.26513	187	38	5.37954e-102	Up-regulated
ATP1B1	Pig	1.52693e-106	0.744832	709	456	5.58018e-102	Up-regulated
CACNA2D1	Pig	1.74421e-106	0.693062	848	713	6.37421e-102	Up-regulated
ARHGAP29	Pig	1.81136e-106	2.01736	197	43	6.6196e-102	Up-regulated
CBLB	Pig	1.93019e-106	0.908403	719	511	7.0539e-102	Up-regulated
ADAM10	Pig	2.72315e-106	1.04298	0.39	166	9.95176e-102	Up-regulated
ZFP64	Pig	4.13097e-106	2.22359	189	39	1.50966e-101	Up-regulated
ASPH	Pig	5.37235e-106	0.992362	516	269	1.96333e-101	Up-regulated
ROCK2	Pig	5.50794e-106	0.922429	824	659	2.01288e-101	Up-regulated
FSD1L	Pig	5.97784e-106	1.2816	326	122	2.1846e-101	Up-regulated
CD46	Human	6.25838e-106	1.08902	543	0.32	2.28713e-101	Up-regulated
MED13	Pig	8.62555e-106	0.837909	619	367	3.15221e-101	Up-regulated
SEC24D	Pig	8.98634e-106	0.942119	549	306	3.28406e-101	Up-regulated
ENSSSCG00000012427	Pig	9.72293e-106	4.87216	113	5	3.55325e-101	Up-regulated
MDM2	Pig	1.10116e-105	1.69581	0.31	116	4.02418e-101	Up-regulated
ERP44	Pig	1.35652e-105	1.05528	373	152	4.95742e-101	Up-regulated
FGGY	Pig	1.49193e-105	1.25975	382	165	5.45224e-101	Up-regulated
NRXN3	Pig	3.01954e-105	3.93203	235	74	1.10349e-100	Up-regulated
TRPS1	Pig	3.78482e-105	2.37808	201	49	1.38316e-100	Up-regulated
MTX3	Pig	9.14918e-105	2.44714	172	32	3.34357e-100	Up-regulated
FOXS1	Pig	2.41375e-104	10.7918	98	0	8.82104e-100	Up-regulated
SRBD1	Pig	2.72632e-104	1.04058	443	0.21	9.96333e-100	Up-regulated
GPD2	Pig	4.35109e-104	1.23411	321	0.12	1.59011e-99	Up-regulated
GSTCD	Pig	5.27918e-104	2.55427	154	23	1.92928e-99	Up-regulated
SENP7	Pig	5.76486e-104	1.06895	0.39	168	2.10677e-99	Up-regulated
SLC44A1	Pig	1.06635e-103	2.28367	177	35	3.89697e-99	Up-regulated
AGFG1	Pig	1.61159e-103	1.30275	371	0.16	5.88955e-99	Up-regulated
YBX3	Pig	2.59408e-103	0.788566	661	423	9.48006e-99	Up-regulated
OPA1	Pig	4.36005e-103	1.02877	408	182	1.59338e-98	Up-regulated
ME1	Pig	5.4786e-103	1.98817	192	43	2.00215e-98	Up-regulated
NSUN3	Pig	6.27538e-103	1.37496	0.27	88	2.29334e-98	Up-regulated
ENSSSCG00000013889	Pig	8.61332e-103	3.35663	128	12	3.14774e-98	Up-regulated
NAMPT	Pig	8.77581e-103	0.996392	406	0.18	3.20712e-98	Up-regulated
DENND6A	Pig	1.08872e-102	1.46157	305	113	3.97872e-98	Up-regulated
SEMA6D	Pig	1.25732e-102	3.6236	128	12	4.59486e-98	Up-regulated
DOCK9	Pig	1.39277e-102	2.41723	158	26	5.08988e-98	Up-regulated
PHTF1	Pig	1.57774e-102	1.77947	223	0.06	5.76587e-98	Up-regulated
ZFAND3	Pig	1.71659e-102	0.584249	838	679	6.27328e-98	Up-regulated
GTF2F2	Pig	3.46136e-102	1.53386	284	0.1	1.26495e-97	Up-regulated
AIMP1	Pig	3.54468e-102	1.10754	473	242	1.2954e-97	Up-regulated
ENSSSCG00000007322	Pig	5.52735e-102	2.62483	163	29	2.01997e-97	Up-regulated
TBC1D12	Pig	5.74275e-102	1.73495	269	92	2.09869e-97	Up-regulated
SHPRH	Pig	6.2242e-102	1.13631	345	137	2.27463e-97	Up-regulated
EML1	Pig	7.3201e-102	1.38578	339	137	2.67513e-97	Up-regulated
CISD3	Pig	8.4158e-102	2.74361	138	16	3.07555e-97	Up-regulated
ACOT13	Pig	1.01813e-101	0.963926	488	254	3.72075e-97	Up-regulated
SUPT3H	Pig	1.30615e-101	0.919813	525	284	4.77332e-97	Up-regulated
APBB2	Pig	2.89916e-101	1.25725	357	151	1.0595e-96	Up-regulated
ENSSSCG00000009208	Pig	3.13432e-101	1.64455	268	91	1.14544e-96	Up-regulated
FILIP1L	Pig	3.21114e-101	0.966622	399	178	1.17351e-96	Up-regulated
PNPT1	Pig	5.77029e-101	1.81761	204	51	2.10875e-96	Up-regulated
CEBPG	Pig	6.08368e-101	3.04923	142	19	2.22328e-96	Up-regulated
BTRC	Pig	6.77802e-101	0.7677	645	386	2.47703e-96	Up-regulated
VEZF1	Pig	7.58089e-101	1.33222	288	102	2.77043e-96	Up-regulated
RGS8	Pig	8.10725e-101	1.9384	199	48	2.9628e-96	Up-regulated
TBC1D5	Pig	8.80875e-101	0.757418	691	479	3.21916e-96	Up-regulated
TTLL7	Pig	8.9673e-101	0.603686	619	356	3.2771e-96	Up-regulated
PPP4R3B	Pig	1.02175e-100	0.962172	453	216	3.73397e-96	Up-regulated
IQGAP1	Pig	1.12388e-100	0.84996	598	348	4.10722e-96	Up-regulated
PCGF5	Pig	1.19105e-100	0.613906	873	704	4.3527e-96	Up-regulated
MARK1	Pig	1.21012e-100	0.699445	519	262	4.42237e-96	Up-regulated
TMX3	Pig	1.32229e-100	1.67173	218	58	4.8323e-96	Up-regulated
SLC39A11	Pig	1.45361e-100	1.7275	238	72	5.31224e-96	Up-regulated
ABI2	Pig	1.7628e-100	3.89611	118	9	6.44214e-96	Up-regulated
ZHX3	Pig	1.89161e-100	1.96895	208	55	6.91289e-96	Up-regulated
BST2	Pig	1.9386e-100	7.89748	96	0	7.08463e-96	Up-regulated
RAB9B	Pig	2.13987e-100	4.4256	108	5	7.82017e-96	Up-regulated
GPC4	Pig	2.3419e-100	1.88986	197	46	8.55849e-96	Up-regulated
PIK3CA	Pig	2.73231e-100	0.955432	461	228	9.98523e-96	Up-regulated
GPA33	Pig	2.76295e-100	4.09401	109	5	1.00972e-95	Up-regulated
FAM168A	Pig	2.92133e-100	0.940356	0.42	193	1.0676e-95	Up-regulated
MAP2K5	Pig	3.5934e-100	0.973459	514	274	1.31321e-95	Up-regulated
TEX14	Pig	3.91885e-100	2.48788	176	37	1.43214e-95	Up-regulated
ENSSSCG00000038708	Pig	4.20599e-100	1.55391	229	65	1.53708e-95	Up-regulated
ENSSSCG00000031589	Pig	6.99516e-100	4.02751	108	5	2.55638e-95	Up-regulated
SNX25	Pig	7.36013e-100	1.54403	245	75	2.68976e-95	Up-regulated
SLC16A12	Pig	7.70929e-100	10.4522	94	0	2.81736e-95	Up-regulated
MAGI3	Pig	8.17874e-100	1.26768	321	126	2.98892e-95	Up-regulated
GABRB1	Pig	9.81857e-100	1.11342	349	143	3.5882e-95	Up-regulated
HTATIP2	Pig	1.09092e-99	2.91708	0.13	14	3.98677e-95	Up-regulated
MBOAT2	Pig	1.17043e-99	1.14549	0.32	121	4.27735e-95	Up-regulated
TRMT10A	Pig	1.3502e-99	2.23393	172	34	4.93429e-95	Up-regulated
TTLL5	Pig	1.44479e-99	1.65889	226	64	5.27998e-95	Up-regulated
ATP5MD	Pig	1.69817e-99	1.52691	0.24	72	6.20598e-95	Up-regulated
RAB18	Pig	1.83159e-99	0.967994	449	217	6.69354e-95	Up-regulated
ELAPOR2	Pig	3.29509e-99	1.13493	321	125	1.20419e-94	Up-regulated
NES	Pig	4.78748e-99	10.4194	94	0	1.74959e-94	Up-regulated
CEMIP2	Pig	6.75078e-99	2.91743	139	19	2.46707e-94	Up-regulated
SEPTIN9	Pig	6.76115e-99	3.14565	142	0.02	2.47086e-94	Up-regulated
CHORDC1	Pig	7.26739e-99	0.984473	386	169	2.65587e-94	Up-regulated
CLTC	Pig	7.77642e-99	0.967127	457	227	2.84189e-94	Up-regulated
GFM2	Pig	7.81415e-99	2.11508	167	32	2.85568e-94	Up-regulated
ENSSSCG00000001931	Pig	9.05594e-99	3.53347	114	8	3.30949e-94	Up-regulated
TBC1D19	Pig	1.5764e-98	1.24838	279	95	5.76094e-94	Up-regulated
DENND1B	Pig	1.98178e-98	0.983703	489	253	7.24242e-94	Up-regulated
TRANK1	Pig	2.18655e-98	2.46197	0.18	0.04	7.99075e-94	Up-regulated
BCLAF3	Pig	2.47101e-98	1.20238	344	141	9.03032e-94	Up-regulated
TEX2	Pig	4.38543e-98	1.10079	341	136	1.60266e-93	Up-regulated
IGF2BP3	Pig	5.77635e-98	1.16511	0.37	0.16	2.11097e-93	Up-regulated
ATR	Pig	5.80763e-98	1.3675	282	98	2.1224e-93	Up-regulated
CASP3	Pig	6.19683e-98	1.68038	207	53	2.26463e-93	Up-regulated
SLC36A4	Pig	6.48038e-98	1.68621	236	72	2.36826e-93	Up-regulated
ARHGAP21	Pig	6.66687e-98	1.09912	439	218	2.43641e-93	Up-regulated
OSMR	Pig	6.88526e-98	4.20059	109	6	2.51622e-93	Up-regulated
SYNE2	Pig	9.79917e-98	1.9205	197	49	3.58111e-93	Up-regulated
RAD23B	Pig	1.29159e-97	0.883413	453	221	4.72011e-93	Up-regulated
CTSB	Pig	1.49062e-97	2.39424	166	33	5.44748e-93	Up-regulated
TASOR2	Pig	1.59062e-97	1.28369	0.31	118	5.81293e-93	Up-regulated
RFX3	Pig	1.64601e-97	2.73624	153	27	6.01534e-93	Up-regulated
MORC3	Pig	3.02182e-97	1.66879	235	71	1.10432e-92	Up-regulated
CADM1	Pig	3.11166e-97	4.44784	104	4	1.13715e-92	Up-regulated
GSR	Pig	5.03309e-97	2.10766	212	58	1.83934e-92	Up-regulated
TNIK	Pig	5.16267e-97	0.799822	615	374	1.8867e-92	Up-regulated
CASK	Pig	6.4265e-97	1.72919	226	67	2.34856e-92	Up-regulated
PTPRG	Pig	7.74943e-97	1.1015	422	205	2.83203e-92	Up-regulated
ENSSSCG00000008576	Pig	8.39939e-97	1.7044	251	82	3.06956e-92	Up-regulated
NUAK1	Pig	1.16828e-96	1.64372	278	0.1	4.26946e-92	Up-regulated
GALK2	Pig	1.48056e-96	1.76469	213	59	5.4107e-92	Up-regulated
ENSSSCG00000051311	Pig	1.66518e-96	2.74759	137	18	6.08538e-92	Up-regulated
APBA1	Pig	1.70277e-96	3.79567	0.12	11	6.22278e-92	Up-regulated
TFG	Pig	1.72218e-96	1.32351	264	88	6.29371e-92	Up-regulated
LRP6	Pig	2.13005e-96	1.02912	419	199	7.78427e-92	Up-regulated
VRK2	Pig	3.22731e-96	1.31864	305	118	1.17942e-91	Up-regulated
ALOX15	Pig	4.37538e-96	2.64834	152	26	1.59898e-91	Up-regulated
SPAG16	Pig	4.44098e-96	2.24166	195	0.05	1.62296e-91	Up-regulated
TTC7B	Pig	4.85148e-96	0.949222	539	299	1.77297e-91	Up-regulated
MSN	Pig	5.12596e-96	2.66496	145	23	1.87328e-91	Up-regulated
ANKRD17	Pig	5.57067e-96	0.543215	0.87	726	2.0358e-91	Up-regulated
BMPER	Pig	5.59086e-96	3.28395	126	14	2.04318e-91	Up-regulated
PDE7B	Pig	5.96652e-96	7.96686	91	0	2.18046e-91	Up-regulated
DPP8	Pig	7.14753e-96	1.19915	348	147	2.61207e-91	Up-regulated
RPGRIP1L	Pig	1.06421e-95	1.58369	227	67	3.88915e-91	Up-regulated
GOLM2	Pig	1.27182e-95	0.90701	399	179	4.64785e-91	Up-regulated
MED14	Pig	1.44151e-95	1.21413	269	91	5.26802e-91	Up-regulated
ENSSSCG00000039473	Pig	1.46079e-95	0.955969	533	291	5.33845e-91	Up-regulated
SLC1A4	Pig	1.96156e-95	4.85012	0.1	4	7.1685e-91	Up-regulated
MED12L	Pig	2.01785e-95	4.87562	107	6	7.37422e-91	Up-regulated
ADAM17	Pig	3.04343e-95	2.74565	143	22	1.11222e-90	Up-regulated
ATG4C	Pig	3.10265e-95	3.25246	127	15	1.13386e-90	Up-regulated
RPL29	Pig	3.55935e-95	2.87114	0.13	16	1.30076e-90	Up-regulated
CMC1	Pig	3.58586e-95	1.99296	175	38	1.31045e-90	Up-regulated
FSTL3	Pig	4.10898e-95	2.83938	131	16	1.50163e-90	Up-regulated
NDUFB5	Pig	4.13707e-95	1.17363	294	109	1.51189e-90	Up-regulated
PDZRN3	Pig	6.54779e-95	0.622799	799	606	2.39289e-90	Up-regulated
OXNAD1	Pig	9.27815e-95	1.20133	0.28	99	3.3907e-90	Up-regulated
ARPP21	Pig	9.38077e-95	4.20296	101	4	3.4282e-90	Up-regulated
NUBPL	Pig	9.94025e-95	1.16057	344	144	3.63266e-90	Up-regulated
IMMP1L	Pig	1.08657e-94	1.00299	367	161	3.97086e-90	Up-regulated
SLC25A4	Pig	1.16231e-94	0.859128	819	739	4.24767e-90	Up-regulated
OXCT1	Pig	1.16537e-94	0.799993	602	365	4.25884e-90	Up-regulated
PDSS2	Pig	1.20936e-94	1.43927	226	67	4.41962e-90	Up-regulated
TFRC	Pig	1.21785e-94	0.763973	434	208	4.45063e-90	Up-regulated
MINDY3	Pig	1.43296e-94	1.97066	179	41	5.23676e-90	Up-regulated
LRRC2	Pig	1.65263e-94	0.52316	912	819	6.03955e-90	Up-regulated
ATF3	Pig	2.16785e-94	4.27681	0.11	8	7.92241e-90	Up-regulated
ZCCHC8	Pig	2.25561e-94	1.15547	0.32	125	8.24312e-90	Up-regulated
LYST	Pig	2.54438e-94	0.803315	503	262	9.29845e-90	Up-regulated
GTF2A1L	Pig	2.70895e-94	4.9769	97	3	9.89985e-90	Up-regulated
RALGAPA2	Pig	2.77203e-94	1.36009	318	127	1.01304e-89	Up-regulated
ENSSSCG00000027557	Pig	2.85237e-94	0.76454	615	355	1.0424e-89	Up-regulated
ENSSSCG00000007203	Pig	3.38555e-94	0.909388	419	197	1.23725e-89	Up-regulated
PCYT1A	Pig	5.31969e-94	0.824798	489	251	1.94408e-89	Up-regulated
PSMA6	Pig	6.48845e-94	1.1216	338	142	2.37121e-89	Up-regulated
DEUP1	Pig	9.0996e-94	3.45231	124	14	3.32545e-89	Up-regulated
DROSHA	Pig	9.52996e-94	1.44331	243	77	3.48272e-89	Up-regulated
ZNFX1	Pig	1.24266e-93	2.3275	161	32	4.54131e-89	Up-regulated
ANKHD1	Pig	1.26855e-93	0.704259	719	489	4.63591e-89	Up-regulated
PRIMPOL	Pig	1.46744e-93	2.19464	159	0.03	5.36277e-89	Up-regulated
RPL37	Pig	1.53684e-93	3.50665	117	11	5.61637e-89	Up-regulated
COX6A2	Pig	1.75468e-93	1.5032	257	88	6.41249e-89	Up-regulated
MCU	Pig	2.6268e-93	1.19657	374	172	9.59965e-89	Up-regulated
C12orf4	Pig	3.50922e-93	1.76301	192	48	1.28244e-88	Up-regulated
TLE4	Pig	3.61862e-93	1.30911	306	121	1.32242e-88	Up-regulated
HBS1L	Pig	3.6264e-93	1.027	396	184	1.32527e-88	Up-regulated
RHOT1	Pig	4.80729e-93	0.658921	721	493	1.75682e-88	Up-regulated
REEP1	Pig	5.77233e-93	1.08141	0.38	0.17	2.1095e-88	Up-regulated
TTC39A	Pig	6.51662e-93	4.11834	101	5	2.3815e-88	Up-regulated
RARS2	Pig	1.15896e-92	1.06189	328	133	4.23543e-88	Up-regulated
PDE6D	Pig	1.78555e-92	1.78762	187	45	6.5253e-88	Up-regulated
RPL35	Pig	2.41052e-92	2.19205	165	35	8.80923e-88	Up-regulated
MTPAP	Pig	2.61997e-92	0.86737	363	154	9.57469e-88	Up-regulated
RHOA	Pig	3.30224e-92	0.979719	556	322	1.2068e-87	Up-regulated
GPR155	Pig	4.18424e-92	5.31353	95	3	1.52913e-87	Up-regulated
RYK	Pig	4.25744e-92	1.02987	393	183	1.55588e-87	Up-regulated
PLEKHA7	Pig	4.65338e-92	0.88242	411	194	1.70058e-87	Up-regulated
PAPSS2	Pig	5.55536e-92	2.40968	157	0.03	2.03021e-87	Up-regulated
DDHD2	Pig	5.8237e-92	1.39087	242	77	2.12827e-87	Up-regulated
YAP1	Pig	6.11675e-92	0.77515	635	406	2.23537e-87	Up-regulated
6,00 LSM	Pig	6.21615e-92	2.18377	162	33	2.27169e-87	Up-regulated
SARS1	Pig	6.96595e-92	2.02663	163	33	2.54571e-87	Up-regulated
MAPK6	Pig	9.84341e-92	1.17231	287	106	3.59728e-87	Up-regulated
HIVEP1	Pig	1.9848e-91	1.79416	204	57	7.25345e-87	Up-regulated
LRRC7	Pig	2.02678e-91	3.03947	139	22	7.40686e-87	Up-regulated
TEP1	Pig	2.16729e-91	3.04967	138	22	7.92035e-87	Up-regulated
RBM15	Pig	3.68653e-91	1.81935	172	38	1.34724e-86	Up-regulated
ENSSSCG00000016646	Pig	4.71115e-91	0.994018	457	239	1.72169e-86	Up-regulated
SHQ1	Pig	4.73419e-91	2.16041	152	28	1.73011e-86	Up-regulated
SPPL2A	Pig	5.40823e-91	0.736533	439	212	1.97644e-86	Up-regulated
GARS1	Pig	6.70182e-91	1.98351	175	41	2.44918e-86	Up-regulated
SMG7	Pig	7.40413e-91	0.917459	416	199	2.70584e-86	Up-regulated
CAV3	Pig	1.29001e-90	1.81139	175	0.04	4.71436e-86	Up-regulated
TXNRD3	Pig	1.72629e-90	2.51136	134	0.02	6.30873e-86	Up-regulated
RBM26	Pig	1.78954e-90	0.802869	578	342	6.53986e-86	Up-regulated
PCSK6	Pig	4.02403e-90	1.35917	335	147	1.47058e-85	Up-regulated
FRRS1	Pig	5.26898e-90	0.8528	422	207	1.92555e-85	Up-regulated
ENSSSCG00000015645	Pig	5.44408e-90	2.28539	143	24	1.98954e-85	Up-regulated
SPAG11	Pig	5.57727e-90	2.14738	164	35	2.03821e-85	Up-regulated
SPTB	Pig	6.9226e-90	0.84318	0.49	257	2.52987e-85	Up-regulated
KPNA4	Pig	9.83415e-90	0.993764	451	234	3.59389e-85	Up-regulated
AKR1D1	Pig	1.22274e-89	3.60984	116	12	4.46852e-85	Up-regulated
ENSSSCG00000025224	Pig	1.30406e-89	0.714972	633	407	4.76569e-85	Up-regulated
RAB30	Pig	1.55577e-89	1.02821	389	182	5.68556e-85	Up-regulated
CERS6	Pig	2.24334e-89	3.25064	135	22	8.1983e-85	Up-regulated
AKAP7	Pig	2.38589e-89	1.75996	239	82	8.71922e-85	Up-regulated
PLSCR1	Pig	2.42727e-89	3.51439	114	11	8.87045e-85	Up-regulated
ENSSSCG00000033310	Pig	3.62235e-89	1.48152	291	116	1.32379e-84	Up-regulated
RBM45	Pig	3.96241e-89	2.02216	168	38	1.44806e-84	Up-regulated
PACSIN2	Pig	4.04518e-89	0.747012	617	382	1.47831e-84	Up-regulated
SEPTIN7	Pig	4.77667e-89	0.889341	498	273	1.74563e-84	Up-regulated
IKZF2	Pig	4.89763e-89	1.30203	283	107	1.78984e-84	Up-regulated
ENSSSCG00000016426	Pig	5.96661e-89	1.51842	249	86	2.1805e-84	Up-regulated
SYNJ2	Pig	7.37277e-89	4.66379	94	4	2.69438e-84	Up-regulated
PIBF1	Pig	8.77413e-89	1.02018	347	149	3.2065e-84	Up-regulated
CPEB2	Pig	1.13071e-88	1.28143	313	131	4.13218e-84	Up-regulated
EPB41L3	Pig	1.15609e-88	0.618486	856	738	4.22494e-84	Up-regulated
SERP2	Pig	1.25124e-88	3.05666	138	23	4.57264e-84	Up-regulated
SH3PXD2B	Pig	1.29957e-88	1.39671	298	118	4.74929e-84	Up-regulated
ENSSSCG00000015027	Pig	1.33984e-88	2.69259	122	15	4.89645e-84	Up-regulated
ALMS1	Pig	1.88227e-88	1.22836	304	121	6.87876e-84	Up-regulated
LMBRD1	Pig	2.06982e-88	1.2329	282	107	7.56415e-84	Up-regulated
PGAP1	Pig	2.07382e-88	1.91027	185	47	7.57876e-84	Up-regulated
NUMB	Pig	2.13692e-88	1.0728	392	187	7.80937e-84	Up-regulated
TRMT13	Pig	2.90216e-88	2.14733	159	33	1.06059e-83	Up-regulated
TMEM184C	Pig	3.97803e-88	1.45335	239	79	1.45377e-83	Up-regulated
MAP3K1	Pig	4.72937e-88	2.12211	159	34	1.72835e-83	Up-regulated
NOVA1	Pig	5.93553e-88	1.72312	217	69	2.16914e-83	Up-regulated
MOCS2	Pig	7.57156e-88	0.803681	0.43	209	2.76703e-83	Up-regulated
TOM1L1	Pig	7.75353e-88	2.34805	158	33	2.83353e-83	Up-regulated
RMDN1	Pig	7.75367e-88	1.60294	198	55	2.83358e-83	Up-regulated
PXK	Pig	8.71207e-88	0.880542	433	216	3.18383e-83	Up-regulated
GTDC1	Pig	1.21711e-87	1.26884	349	0.16	4.44794e-83	Up-regulated
RBM12B	Pig	1.27331e-87	0.969523	396	187	4.65333e-83	Up-regulated
AVEN	Pig	1.36089e-87	1.01739	328	138	4.97339e-83	Up-regulated
ENSSSCG00000011559	Pig	1.38168e-87	1.69658	0.2	56	5.04936e-83	Up-regulated
ANXA6	Pig	1.52244e-87	1.57912	245	83	5.56374e-83	Up-regulated
SLAIN2	Pig	1.72428e-87	1.10476	398	193	6.30138e-83	Up-regulated
GCLC	Pig	1.8051e-87	2.79254	0.12	15	6.59674e-83	Up-regulated
TTC27	Pig	2.65177e-87	1.31658	244	82	9.69088e-83	Up-regulated
MBNL3	Pig	2.6661e-87	1.6756	223	0.07	9.74327e-83	Up-regulated
ARHGEF33	Pig	3.46689e-87	1.82793	171	0.04	1.26698e-82	Up-regulated
LRPPRC	Pig	4.83355e-87	0.942194	374	169	1.76642e-82	Up-regulated
VPS45	Pig	5.03252e-87	2.59159	128	18	1.83914e-82	Up-regulated
MLLT10	Pig	5.78593e-87	0.584643	801	0.62	2.11447e-82	Up-regulated
SUSD1	Pig	7.62476e-87	3.05917	117	13	2.78647e-82	Up-regulated
TIGAR	Pig	1.1045e-86	0.999677	318	0.13	4.03641e-82	Up-regulated
IFNGR1	Pig	1.24695e-86	2.19472	0.16	35	4.55699e-82	Up-regulated
SGCD	Pig	1.29068e-86	0.732876	884	844	4.71678e-82	Up-regulated
BIRC6	Pig	2.0169e-86	0.621196	763	562	7.37078e-82	Up-regulated
KDM1B	Pig	2.08098e-86	3.20269	113	12	7.60496e-82	Up-regulated
MIB1	Pig	2.71192e-86	0.938266	445	229	9.9107e-82	Up-regulated
PIK3C3	Pig	4.61663e-86	1.06364	359	162	1.68715e-81	Up-regulated
ENSSSCG00000013609	Pig	6.09065e-86	2.62277	118	14	2.22583e-81	Up-regulated
TM6SF1	Pig	6.16235e-86	2.09826	148	29	2.25203e-81	Up-regulated
MX2	Pig	6.60748e-86	10.9704	81	0	2.4147e-81	Up-regulated
YWHAZ	Pig	1.11506e-85	0.834362	525	303	4.07497e-81	Up-regulated
ITFG1	Pig	1.39441e-85	0.790315	523	289	5.09588e-81	Up-regulated
FDX1	Pig	1.48471e-85	1.65042	0.19	51	5.42587e-81	Up-regulated
SNX21	Pig	1.73578e-85	2.28664	0.16	36	6.34342e-81	Up-regulated
RPN2	Pig	2.12608e-85	1.54716	202	59	7.76976e-81	Up-regulated
KIF3C	Pig	3.16124e-85	2.25436	152	31	1.15528e-80	Up-regulated
KIAA1109	Pig	3.43697e-85	1.00486	0.42	212	1.25604e-80	Up-regulated
TRAPPC8	Pig	4.1778e-85	1.03773	348	155	1.52678e-80	Up-regulated
WAC	Pig	5.63707e-85	0.796965	573	345	2.06007e-80	Up-regulated
SEC22C	Pig	5.82293e-85	1.48916	206	61	2.12799e-80	Up-regulated
CDKL1	Pig	7.07411e-85	2.57524	147	29	2.58523e-80	Up-regulated
E2F3	Pig	7.57375e-85	1.15791	274	103	2.76783e-80	Up-regulated
SLC38A6	Pig	8.07622e-85	2.87128	121	17	2.95145e-80	Up-regulated
ENSSSCG00000016119	Pig	8.99597e-85	1.27021	316	136	3.28758e-80	Up-regulated
C2CD3	Pig	9.76824e-85	1.4937	219	0.07	3.5698e-80	Up-regulated
HIRA	Pig	1.00066e-84	1.26699	251	89	3.6569e-80	Up-regulated
FOXN2	Pig	1.01377e-84	3.17329	115	14	3.70481e-80	Up-regulated
UBE2W	Pig	1.20825e-84	0.969173	444	227	4.41555e-80	Up-regulated
CCDC126	Pig	1.25103e-84	1.45917	197	56	4.57189e-80	Up-regulated
FBXL5	Pig	1.46623e-84	1.25291	266	98	5.35833e-80	Up-regulated
ENSSSCG00000012006	Pig	1.59604e-84	6.81115	83	1	5.83273e-80	Up-regulated
C1orf21	Pig	1.60062e-84	0.515187	0.9	782	5.84946e-80	Up-regulated
B4GALT5	Pig	2.18467e-84	1.1595	405	206	7.98386e-80	Up-regulated
ATF6	Pig	2.62501e-84	0.738493	571	334	9.59311e-80	Up-regulated
ETFA	Pig	2.96486e-84	0.775849	535	0.31	1.08351e-79	Up-regulated
AZIN1	Pig	3.82263e-84	1.49363	302	129	1.39698e-79	Up-regulated
CAGE1	Pig	4.25602e-84	1.43573	192	53	1.55536e-79	Up-regulated
ANKS6	Pig	9.06776e-84	2.34138	0.13	21	3.31381e-79	Up-regulated
CGGBP1	Pig	1.09852e-83	1.29626	0.22	0.07	4.01452e-79	Up-regulated
ENSSSCG00000024974	Pig	1.12994e-83	2.11138	157	35	4.12936e-79	Up-regulated
ENSSSCG00000005424	Pig	1.26303e-83	0.7421	486	0.26	4.61574e-79	Up-regulated
PDS5A	Pig	1.43094e-83	0.804074	469	248	5.22937e-79	Up-regulated
HSPG2	Pig	1.79154e-83	1.06606	391	194	6.54718e-79	Up-regulated
ERBB3	Pig	1.86857e-83	2.98426	119	16	6.82869e-79	Up-regulated
SCFD1	Pig	2.44147e-83	0.85768	448	233	8.92237e-79	Up-regulated
CAB39	Pig	2.4701e-83	0.840763	516	293	9.02697e-79	Up-regulated
PML	Pig	3.17011e-83	2.47189	146	0.03	1.15852e-78	Up-regulated
SELENOT	Pig	3.42383e-83	0.925848	317	132	1.25124e-78	Up-regulated
PACSIN3	Pig	3.65291e-83	0.912104	264	96	1.33496e-78	Up-regulated
CDK7	Pig	4.18484e-83	2.28334	146	29	1.52935e-78	Up-regulated
EVI5	Pig	4.49823e-83	0.897491	455	242	1.64388e-78	Up-regulated
STK10	Pig	4.83906e-83	2.00524	164	39	1.76843e-78	Up-regulated
GRB2	Pig	5.07791e-83	1.16243	0.31	131	1.85572e-78	Up-regulated
STAM	Pig	5.10628e-83	1.44341	205	61	1.86609e-78	Up-regulated
ENSSSCG00000038144	Pig	6.16885e-83	1.05998	422	221	2.2544e-78	Up-regulated
TPST1	Pig	8.89369e-83	3.13078	0.11	13	3.2502e-78	Up-regulated
MGARP	Pig	1.45298e-82	1.51504	198	58	5.30991e-78	Up-regulated
GLB1	Pig	1.68468e-82	0.723322	572	0.34	6.15668e-78	Up-regulated
ATP11C	Pig	2.36796e-82	0.745652	462	246	8.65371e-78	Up-regulated
ENSSSCG00000028092	Pig	5.03954e-82	7.01198	0.08	1	1.8417e-77	Up-regulated
C8orf34	Pig	5.39541e-82	2.33825	148	31	1.97175e-77	Up-regulated
EPSTI1	Pig	5.72314e-82	3.85226	98	8	2.09152e-77	Up-regulated
ARFGAP3	Pig	8.25572e-82	1.16974	266	0.1	3.01705e-77	Up-regulated
EPS15L1	Pig	9.67155e-82	1.38862	253	93	3.53447e-77	Up-regulated
SLC47A1	Pig	1.41954e-81	1.74496	161	38	5.18771e-77	Up-regulated
MRS2	Pig	1.43499e-81	0.950417	252	0.09	5.24419e-77	Up-regulated
KIAA0586	Pig	1.59174e-81	1.29157	226	75	5.81703e-77	Up-regulated
ARHGEF12	Pig	1.68499e-81	0.65489	668	443	6.15779e-77	Up-regulated
SMAP2	Pig	2.01856e-81	4.49583	0.09	5	7.37683e-77	Up-regulated
ENSSSCG00000035544	Pig	2.12482e-81	0.75632	477	254	7.76517e-77	Up-regulated
CKMT2	Pig	2.39156e-81	0.757953	558	331	8.73996e-77	Up-regulated
ACBD6	Pig	3.82601e-81	1.08095	302	126	1.39822e-76	Up-regulated
RMDN2	Pig	4.93179e-81	1.47758	216	0.07	1.80232e-76	Up-regulated
NFXL1	Pig	4.95765e-81	1.97057	143	28	1.81177e-76	Up-regulated
TRIOBP	Pig	7.72758e-81	2.80127	128	22	2.82404e-76	Up-regulated
URI1	Pig	8.20944e-81	0.780277	495	277	3.00014e-76	Up-regulated
SEL1L	Pig	9.3825e-81	1.2104	261	99	3.42884e-76	Up-regulated
ATP5MC3	Pig	1.14397e-80	1.93207	146	0.03	4.18065e-76	Up-regulated
RAB4A	Pig	1.17269e-80	1.2398	242	86	4.28561e-76	Up-regulated
ANKAR	Pig	1.85085e-80	2.42825	133	24	6.76393e-76	Up-regulated
STAT3	Pig	1.94073e-80	0.88789	409	204	7.09239e-76	Up-regulated
MACIR	Pig	2.27095e-80	3.67206	95	7	8.29919e-76	Up-regulated
CTSD	Pig	2.32747e-80	1.28246	225	75	8.50573e-76	Up-regulated
PHLDA2	Pig	2.57139e-80	3.83798	93	6	9.39714e-76	Up-regulated
CCDC136	Pig	2.62181e-80	1.5234	188	54	9.5814e-76	Up-regulated
SLC7A11	Pig	2.94841e-80	1.90001	171	45	1.07749e-75	Up-regulated
PPHLN1	Pig	3.33741e-80	1.01268	313	134	1.21966e-75	Up-regulated
ASPRV1	Pig	3.41218e-80	1.77128	189	55	1.24698e-75	Up-regulated
TTC28	Pig	3.92129e-80	0.584592	763	572	1.43304e-75	Up-regulated
ARPC2	Pig	3.98391e-80	1.16713	287	118	1.45592e-75	Up-regulated
FAM120C	Pig	4.56628e-80	1.27862	237	84	1.66875e-75	Up-regulated
ENSSSCG00000000576	Pig	4.64561e-80	0.719575	482	262	1.69774e-75	Up-regulated
ENSSSCG00000033871	Pig	5.983e-80	1.5906	165	0.04	2.18649e-75	Up-regulated
ARL5B	Pig	6.9535e-80	2.16367	136	26	2.54116e-75	Up-regulated
DNAJC10	Pig	1.01157e-79	1.65794	166	41	3.69679e-75	Up-regulated
RHBDD1	Pig	1.54662e-79	2.06769	164	42	5.65213e-75	Up-regulated
FBXL2	Pig	2.6965e-79	1.33318	218	72	9.85435e-75	Up-regulated
PARP9	Pig	3.22153e-79	6.91373	78	1	1.17731e-74	Up-regulated
IMPG2	Pig	3.4214e-79	2.44657	129	23	1.25035e-74	Up-regulated
LARP1B	Pig	6.00386e-79	0.943404	273	107	2.19411e-74	Up-regulated
NXN	Pig	7.48146e-79	2.24114	119	18	2.7341e-74	Up-regulated
CANX	Pig	8.42623e-79	0.875394	353	161	3.07937e-74	Up-regulated
UBA3	Pig	1.03548e-78	0.996982	301	125	3.78416e-74	Up-regulated
ENSSSCG00000011676	Pig	1.10632e-78	1.31582	204	64	4.04304e-74	Up-regulated
ENSSSCG00000034015	Pig	1.20334e-78	1.20376	0.32	143	4.39762e-74	Up-regulated
ARHGAP17	Pig	1.27416e-78	1.18613	514	0.31	4.65643e-74	Up-regulated
CNNM2	Pig	1.27518e-78	2.06771	148	33	4.66016e-74	Up-regulated
SIPA1L1	Pig	1.35295e-78	1.98419	158	39	4.94437e-74	Up-regulated
AARS1	Pig	1.48336e-78	1.52737	232	84	5.42095e-74	Up-regulated
WIPI1	Pig	1.48664e-78	0.920111	0.4	199	5.43294e-74	Up-regulated
LEO1	Pig	2.00296e-78	1.69583	0.16	39	7.31981e-74	Up-regulated
AHR	Pig	2.10865e-78	1.00032	309	134	7.70607e-74	Up-regulated
ZNF148	Pig	2.2401e-78	0.665185	548	322	8.18645e-74	Up-regulated
YAF2	Pig	2.38832e-78	0.855134	0.46	0.25	8.7281e-74	Up-regulated
FAM126A	Pig	2.7119e-78	0.755263	493	275	9.91063e-74	Up-regulated
KCNJ13	Pig	3.30846e-78	2.0066	141	29	1.20908e-73	Up-regulated
THOC3	Pig	3.69558e-78	1.69159	157	38	1.35055e-73	Up-regulated
ENSSSCG00000012566	Pig	5.05806e-78	1.31695	196	0.06	1.84847e-73	Up-regulated
SCP2	Pig	5.64748e-78	1.14036	326	146	2.06387e-73	Up-regulated
TCTN2	Pig	5.90404e-78	1.41128	197	0.06	2.15763e-73	Up-regulated
MRPS27	Pig	5.98067e-78	0.791154	436	228	2.18563e-73	Up-regulated
SMAP1	Pig	6.36054e-78	0.719466	536	312	2.32446e-73	Up-regulated
ATM	Pig	6.41151e-78	0.918235	324	141	2.34309e-73	Up-regulated
TUBB2B	Pig	7.57579e-78	3.20342	0.1	0.01	2.76857e-73	Up-regulated
CAMTA1	Pig	8.04637e-78	0.764513	0.47	254	2.94055e-73	Up-regulated
CCSER1	Pig	8.57156e-78	3.18926	132	26	3.13248e-73	Up-regulated
TRAK1	Pig	9.47168e-78	0.508336	806	615	3.46142e-73	Up-regulated
ENSSSCG00000004578	Pig	9.59921e-78	2.04455	178	51	3.50803e-73	Up-regulated
INVS	Pig	1.07345e-77	0.792895	392	191	3.92292e-73	Up-regulated
MBOAT1	Pig	1.30559e-77	2.88386	115	17	4.77129e-73	Up-regulated
HOOK2	Pig	1.35604e-77	1.9496	153	36	4.95564e-73	Up-regulated
PLEKHA1	Pig	1.82037e-77	0.898321	0.38	188	6.65256e-73	Up-regulated
UOX	Pig	2.22537e-77	1.14518	237	85	8.13262e-73	Up-regulated
LRP2	Pig	2.97713e-77	2.30358	119	19	1.08799e-72	Up-regulated
RPS8	Pig	3.66336e-77	2.37212	127	23	1.33877e-72	Up-regulated
ENSSSCG00000035811	Pig	4.67037e-77	3.33375	108	14	1.70679e-72	Up-regulated
NWD1	Pig	7.36961e-77	1.24782	246	92	2.69322e-72	Up-regulated
PTK2	Pig	8.44498e-77	0.705361	628	404	3.08622e-72	Up-regulated
FTL	Pig	9.9303e-77	2.22094	147	34	3.62903e-72	Up-regulated
HSD17B4	Pig	1.12883e-76	0.792875	406	204	4.12531e-72	Up-regulated
HNRNPR	Pig	1.38605e-76	0.932838	437	234	5.06533e-72	Up-regulated
TIMMDC1	Pig	1.51419e-76	0.824617	302	126	5.53361e-72	Up-regulated
NECTIN3	Pig	1.53917e-76	2.48897	127	24	5.62491e-72	Up-regulated
TRIM21	Pig	1.76952e-76	5.46442	0.08	3	6.4667e-72	Up-regulated
ADGRA3	Pig	2.33004e-76	0.961107	373	184	8.51512e-72	Up-regulated
SPIN1	Pig	2.89805e-76	1.03657	339	156	1.05909e-71	Up-regulated
CDKN1A	Pig	2.91421e-76	3.19638	95	9	1.065e-71	Up-regulated
ENSSSCG00000001924	Pig	2.96376e-76	0.615197	749	0.56	1.08311e-71	Up-regulated
UBR5	Pig	3.24845e-76	0.669882	605	388	1.18715e-71	Up-regulated
INTS9	Pig	3.33467e-76	1.67839	178	51	1.21866e-71	Up-regulated
TM2D3	Pig	3.66309e-76	1.27448	211	0.07	1.33868e-71	Up-regulated
PLAA	Pig	4.00845e-76	0.782755	0.38	183	1.46489e-71	Up-regulated
PRKCI	Pig	4.322e-76	1.3658	232	84	1.57947e-71	Up-regulated
SATB1	Pig	5.13988e-76	1.19492	233	84	1.87837e-71	Up-regulated
ZDHHC21	Pig	8.85965e-76	2.0389	136	28	3.23776e-71	Up-regulated
STRN3	Pig	9.46656e-76	0.652057	696	476	3.45956e-71	Up-regulated
ENSSSCG00000028345	Pig	1.11092e-75	1.21769	245	92	4.05985e-71	Up-regulated
MIER1	Pig	1.17931e-75	0.778238	476	265	4.3098e-71	Up-regulated
CCDC112	Pig	1.2574e-75	0.72873	554	328	4.59517e-71	Up-regulated
COL5A2	Pig	1.28594e-75	2.72296	109	15	4.69948e-71	Up-regulated
BLZF1	Pig	1.68121e-75	1.61047	176	0.05	6.14397e-71	Up-regulated
PALMD	Pig	3.59443e-75	0.6514	639	422	1.31359e-70	Up-regulated
APC	Pig	3.6389e-75	0.752007	469	259	1.32984e-70	Up-regulated
SWAP70	Pig	3.80703e-75	1.2923	225	0.08	1.39128e-70	Up-regulated
HMOX1	Human	3.90291e-75	1.0438	502	306	1.42632e-70	Up-regulated
TRMT11	Pig	4.29661e-75	1.00807	288	0.12	1.5702e-70	Up-regulated
ZNRF2	Pig	5.26398e-75	1.42934	209	71	1.92372e-70	Up-regulated
KRT10	Pig	5.39261e-75	1.97043	135	28	1.97073e-70	Up-regulated
IL34	Pig	5.70961e-75	1.09598	397	209	2.08658e-70	Up-regulated
BLVRA	Pig	6.91227e-75	2.5277	118	0.02	2.52609e-70	Up-regulated
CHD6	Pig	7.08028e-75	0.89514	376	184	2.58749e-70	Up-regulated
ATP5F1D	Pig	1.22492e-74	1.29158	201	64	4.47648e-70	Up-regulated
ENSSSCG00000021041	Pig	1.58071e-74	1.17507	0.21	0.07	5.7767e-70	Up-regulated
HSPA8	Pig	1.65285e-74	1.92027	158	41	6.04033e-70	Up-regulated
ZNF106	Pig	1.83348e-74	0.624409	723	528	6.70045e-70	Up-regulated
PFKFB3	Pig	2.23573e-74	3.94764	84	5	8.17046e-70	Up-regulated
KCNAB1	Pig	2.41186e-74	3.27695	101	12	8.81415e-70	Up-regulated
SMARCAL1	Pig	2.67198e-74	1.13862	0.23	82	9.76475e-70	Up-regulated
AFG1L	Pig	2.6873e-74	0.624486	477	261	9.82076e-70	Up-regulated
RASSF1	Pig	2.93292e-74	4.39578	83	5	1.07184e-69	Up-regulated
ENSSSCG00000001341	Pig	3.32183e-74	9.40438	0.07	0	1.21396e-69	Up-regulated
RND3	Pig	3.36897e-74	1.3432	231	85	1.23119e-69	Up-regulated
CERT1	Pig	3.6152e-74	0.789842	589	377	1.32117e-69	Up-regulated
CHFR	Pig	3.63386e-74	1.06567	287	0.12	1.32799e-69	Up-regulated
ELP4	Pig	4.06673e-74	0.753778	341	156	1.48618e-69	Up-regulated
HELB	Pig	4.22191e-74	2.51674	115	18	1.5429e-69	Up-regulated
RBBP8	Pig	4.24553e-74	1.3839	197	64	1.55153e-69	Up-regulated
ILDR2	Pig	4.97926e-74	8.02168	71	0	1.81967e-69	Up-regulated
CEP83	Pig	5.6843e-74	1.55479	0.18	53	2.07733e-69	Up-regulated
TMEM19	Pig	7.28662e-74	0.789307	371	179	2.6629e-69	Up-regulated
SRD5A2	Pig	1.2062e-73	4.59526	78	3	4.40807e-69	Up-regulated
AATF	Pig	1.36655e-73	1.81078	167	47	4.99407e-69	Up-regulated
RPS6KC1	Pig	1.37877e-73	0.882655	452	0.25	5.03873e-69	Up-regulated
FAM135A	Pig	2.24966e-73	0.722915	466	255	8.22137e-69	Up-regulated
HSDL2	Pig	2.96655e-73	0.808749	324	146	1.08412e-68	Up-regulated
FBXO21	Pig	3.05541e-73	0.811318	416	216	1.1166e-68	Up-regulated
FAM171B	Pig	3.09275e-73	7.37677	71	1	1.13025e-68	Up-regulated
PRPF4B	Pig	3.17574e-73	0.721777	444	236	1.16057e-68	Up-regulated
PARD3	Pig	3.64346e-73	0.575912	848	0.73	1.3315e-68	Up-regulated
XPA	Pig	4.17522e-73	0.971737	0.24	89	1.52583e-68	Up-regulated
TBC1D16	Pig	4.49762e-73	2.13694	0.15	38	1.64365e-68	Up-regulated
MAN1A2	Pig	5.15729e-73	1.14098	238	89	1.88473e-68	Up-regulated
ACO1	Pig	5.40227e-73	0.596097	572	348	1.97426e-68	Up-regulated
PFKP	Pig	5.90443e-73	2.94032	103	14	2.15777e-68	Up-regulated
WRN	Pig	6.1983e-73	1.43536	196	64	2.26517e-68	Up-regulated
ENSSSCG00000037142	Pig	6.40226e-73	4.96837	77	3	2.33971e-68	Up-regulated
CMAH	Pig	6.64241e-73	5.18159	0.08	4	2.42747e-68	Up-regulated
NIN	Pig	1.04732e-72	0.882529	403	208	3.82743e-68	Up-regulated
RPL38	Pig	1.22666e-72	2.78049	98	12	4.48282e-68	Up-regulated
NEDD4	Pig	1.25523e-72	4.47427	78	3	4.58723e-68	Up-regulated
TMLHE	Pig	1.69422e-72	3.00197	99	12	6.19153e-68	Up-regulated
GADD45A	Pig	1.79079e-72	5.58761	77	3	6.54444e-68	Up-regulated
CLMN	Pig	1.91726e-72	2.48529	117	0.02	7.00663e-68	Up-regulated
ENSSSCG00000040273	Pig	1.96121e-72	2.26227	124	24	7.16724e-68	Up-regulated
SYT14	Pig	2.52965e-72	0.967708	232	85	9.24461e-68	Up-regulated
WWC1	Pig	2.5799e-72	2.59814	108	16	9.42826e-68	Up-regulated
ENSSSCG00000030183	Pig	2.61161e-72	2.30737	121	22	9.54415e-68	Up-regulated
ZNF583	Pig	3.98662e-72	1.54446	162	44	1.45691e-67	Up-regulated
AGTPBP1	Pig	4.52999e-72	0.999023	217	76	1.65549e-67	Up-regulated
EXOC6	Pig	4.63126e-72	0.868003	315	141	1.69249e-67	Up-regulated
TPM1	Human	4.70723e-72	1.39803	174	0.05	1.72026e-67	Up-regulated
PRSS55	Pig	7.09564e-72	0.837993	411	217	2.5931e-67	Up-regulated
VPS37A	Pig	7.31584e-72	0.995869	265	108	2.67357e-67	Up-regulated
B3GLCT	Pig	9.83418e-72	2.38359	127	26	3.5939e-67	Up-regulated
MSH4	Pig	1.07872e-71	1.37866	206	72	3.94218e-67	Up-regulated
CPD	Pig	1.33142e-71	1.73818	152	39	4.86569e-67	Up-regulated
ENSSSCG00000011272	Pig	1.85948e-71	2.22979	119	21	6.79546e-67	Up-regulated
FAM227B	Pig	1.89144e-71	1.09926	226	83	6.91228e-67	Up-regulated
ADAL	Pig	2.01758e-71	1.40067	161	43	7.37323e-67	Up-regulated
NME2	Pig	2.20443e-71	2.23959	123	23	8.05607e-67	Up-regulated
PPP1R14B	Pig	2.24312e-71	3.76831	79	4	8.1975e-67	Up-regulated
15,00 ARL	Pig	2.28783e-71	1.04967	291	0.13	8.36086e-67	Up-regulated
NARS2	Pig	2.83908e-71	0.786813	315	141	1.03754e-66	Up-regulated
CAMKK1	Pig	3.35603e-71	4.886	78	4	1.22646e-66	Up-regulated
TAOK1	Pig	4.44301e-71	0.717542	532	316	1.6237e-66	Up-regulated
IRAK3	Pig	4.80569e-71	3.06782	102	14	1.75624e-66	Up-regulated
ENSSSCG00000044127	Pig	5.30104e-71	2.63446	116	0.02	1.93726e-66	Up-regulated
MTMR2	Pig	5.63145e-71	0.856859	315	143	2.05801e-66	Up-regulated
DTX3L	Pig	6.34029e-71	7.79327	68	0	2.31706e-66	Up-regulated
ENSSSCG00000035904	Pig	9.15017e-71	1.51865	179	54	3.34393e-66	Up-regulated
MOSPD1	Pig	9.55235e-71	1.69094	177	54	3.49091e-66	Up-regulated
LAMA4	Pig	1.08008e-70	0.762737	677	499	3.94716e-66	Up-regulated
DPH5	Pig	1.08757e-70	1.68671	134	29	3.97453e-66	Up-regulated
SLC4A7	Pig	1.18814e-70	2.2304	132	29	4.34204e-66	Up-regulated
EFR3B	Pig	1.20461e-70	0.915861	321	148	4.40226e-66	Up-regulated
IPO7	Pig	1.46635e-70	1.16063	255	103	5.35878e-66	Up-regulated
PLOD1	Pig	1.5109e-70	3.06854	92	0.01	5.52158e-66	Up-regulated
LYSMD3	Pig	1.74024e-70	1.5366	176	53	6.35969e-66	Up-regulated
AGO1	Pig	2.23974e-70	0.552001	0.67	446	8.18512e-66	Up-regulated
ENSSSCG00000020830	Pig	2.55073e-70	0.551312	435	226	9.32165e-66	Up-regulated
YLPM1	Pig	2.92197e-70	1.29204	213	75	1.06783e-65	Up-regulated
MRPL57	Pig	3.16382e-70	2.12183	0.12	23	1.15622e-65	Up-regulated
IPMK	Pig	5.24842e-70	2.13539	127	27	1.91803e-65	Up-regulated
SUCLA2	Pig	5.41723e-70	0.609914	378	186	1.97973e-65	Up-regulated
SLC29A2	Pig	6.46092e-70	2.13209	103	14	2.36114e-65	Up-regulated
MIF	Pig	6.99503e-70	2.98382	95	11	2.55633e-65	Up-regulated
SPTLC2	Pig	8.12752e-70	2.70695	105	16	2.9702e-65	Up-regulated
ERC2	Pig	1.38641e-69	3.19509	107	17	5.06664e-65	Up-regulated
FBN2	Pig	1.79034e-69	1.7794	209	77	6.54281e-65	Up-regulated
HEPACAM2	Pig	1.85403e-69	1.56484	152	0.04	6.77556e-65	Up-regulated
ENSSSCG00000014884	Pig	2.03764e-69	1.11644	269	112	7.44655e-65	Up-regulated
SLC25A21	Pig	2.11519e-69	0.79992	457	262	7.72997e-65	Up-regulated
EIF4EBP1	Pig	2.1945e-69	3.21814	91	0.01	8.01978e-65	Up-regulated
ENSSSCG00000003253	Pig	2.20048e-69	1.57546	175	53	8.04164e-65	Up-regulated
C2orf76	Pig	2.72358e-69	2.59711	105	16	9.95331e-65	Up-regulated
ENSSSCG00000027491	Pig	3.27859e-69	1.00061	261	107	1.19816e-64	Up-regulated
DCTN4	Pig	3.81498e-69	0.909365	299	133	1.39419e-64	Up-regulated
ENSSSCG00000023596	Pig	4.23489e-69	2.07873	118	22	1.54764e-64	Up-regulated
TUBB	Pig	4.55347e-69	2.76329	0.1	14	1.66407e-64	Up-regulated
TTC37	Pig	4.97866e-69	0.773171	331	154	1.81945e-64	Up-regulated
STX6	Pig	5.69232e-69	1.12515	262	0.11	2.08026e-64	Up-regulated
PCMT1	Pig	6.01915e-69	0.809359	355	175	2.1997e-64	Up-regulated
DNAJC24	Pig	6.63939e-69	1.65393	147	38	2.42636e-64	Up-regulated
DNAJC13	Pig	6.64254e-69	0.704706	426	225	2.42752e-64	Up-regulated
OSBPL9	Pig	6.95031e-69	0.627741	608	392	2.53999e-64	Up-regulated
ARPC4	Pig	9.09854e-69	2.12576	126	27	3.32506e-64	Up-regulated
RBM18	Pig	9.66628e-69	1.54787	161	46	3.53254e-64	Up-regulated
PFKL	Pig	1.03891e-68	1.30566	139	33	3.7967e-64	Up-regulated
ADM	Pig	1.58439e-68	9.56631	65	0	5.79015e-64	Up-regulated
ATRNL1	Pig	1.63446e-68	5.0375	0.07	2	5.97314e-64	Up-regulated
NHLRC3	Pig	2.64805e-68	0.675866	569	355	9.67729e-64	Up-regulated
PGAM2	Pig	2.70968e-68	2.16901	124	26	9.90254e-64	Up-regulated
TSPAN3	Pig	3.90918e-68	1.23707	226	86	1.42861e-63	Up-regulated
SMARCD3	Pig	4.47146e-68	1.63836	156	43	1.6341e-63	Up-regulated
CPQ	Pig	5.3374e-68	4.70736	75	4	1.95055e-63	Up-regulated
FAM126B	Pig	6.70365e-68	1.01344	286	127	2.44985e-63	Up-regulated
DHX57	Pig	7.06672e-68	1.27547	189	63	2.58253e-63	Up-regulated
SMAD4	Pig	7.31446e-68	0.800693	447	251	2.67307e-63	Up-regulated
NFE2L2	Pig	8.0998e-68	0.763571	496	293	2.96007e-63	Up-regulated
ETS1	Pig	8.12374e-68	7.24354	65	0	2.96882e-63	Up-regulated
LRRC28	Pig	9.13959e-68	0.558152	668	435	3.34006e-63	Up-regulated
C9orf85	Pig	9.16415e-68	1.11024	0.21	75	3.34904e-63	Up-regulated
EPAS1	Pig	9.77527e-68	1.87076	0.13	29	3.57237e-63	Up-regulated
PKIA	Pig	1.10806e-67	0.982446	0.22	81	4.04942e-63	Up-regulated
PMEPA1	Pig	1.28659e-67	3.77074	0.08	6	4.70185e-63	Up-regulated
TARBP1	Pig	1.50774e-67	0.813134	326	152	5.51004e-63	Up-regulated
ENSSSCG00000034230	Pig	1.73254e-67	1.62129	162	47	6.33158e-63	Up-regulated
TRAFD1	Pig	1.8814e-67	2.27957	128	29	6.87558e-63	Up-regulated
UBXN2A	Pig	2.06139e-67	0.738073	0.36	178	7.53333e-63	Up-regulated
ANKIB1	Pig	2.12615e-67	0.722066	445	246	7.77001e-63	Up-regulated
SLC7A2	Pig	2.79801e-67	0.861125	326	157	1.02253e-62	Up-regulated
NDUFB4	Pig	2.9331e-67	1.46567	166	0.05	1.0719e-62	Up-regulated
ECPAS	Pig	3.21908e-67	0.573123	632	414	1.17641e-62	Up-regulated
VPS54	Pig	3.79305e-67	0.66172	586	375	1.38617e-62	Up-regulated
AKIRIN1	Pig	4.3078e-67	0.982872	219	81	1.57429e-62	Up-regulated
RASA2	Pig	4.90672e-67	1.04812	0.3	0.14	1.79316e-62	Up-regulated
KLHL7	Pig	4.96955e-67	1.77223	0.16	47	1.81612e-62	Up-regulated
FGF2	Pig	7.95384e-67	2.9169	93	12	2.90673e-62	Up-regulated
ABHD15	Pig	8.82588e-67	3.38421	85	8	3.22542e-62	Up-regulated
TNNC1	Pig	9.34429e-67	1.05003	542	354	3.41487e-62	Up-regulated
SEPTIN6	Pig	1.04334e-66	1.75586	171	54	3.81287e-62	Up-regulated
MTX2	Pig	1.34367e-66	0.69735	379	194	4.91043e-62	Up-regulated
CBR4	Pig	1.3738e-66	1.46555	144	37	5.02055e-62	Up-regulated
FIG4	Pig	1.5279e-66	0.943865	292	131	5.58372e-62	Up-regulated
RPL36AL	Pig	1.55579e-66	2.33588	112	21	5.68564e-62	Up-regulated
CRYBA1	Pig	1.63183e-66	1.2955	157	45	5.96354e-62	Up-regulated
CDC40	Pig	1.79256e-66	0.727803	335	0.16	6.55092e-62	Up-regulated
AREL1	Pig	1.82918e-66	1.23288	186	61	6.68473e-62	Up-regulated
ANKRD37	Pig	1.97941e-66	8.78553	64	0	7.23375e-62	Up-regulated
GALNT10	Pig	2.05095e-66	1.16547	0.24	96	7.49521e-62	Up-regulated
CCDC15	Pig	2.08844e-66	1.59509	171	54	7.63221e-62	Up-regulated
DDB2	Pig	2.12923e-66	1.80108	163	49	7.78128e-62	Up-regulated
NRDC	Pig	2.23217e-66	0.704705	388	201	8.15747e-62	Up-regulated
PIP5K1C	Pig	2.98344e-66	3.1709	96	13	1.0903e-61	Up-regulated
ENSSSCG00000017640	Pig	3.84946e-66	1.47536	165	49	1.40679e-61	Up-regulated
GLCCI1	Pig	4.64316e-66	3.61333	81	7	1.69684e-61	Up-regulated
DAG1	Pig	4.75464e-66	0.70563	0.59	373	1.73758e-61	Up-regulated
PM20D2	Pig	5.45974e-66	1.16341	239	96	1.99526e-61	Up-regulated
DYM	Pig	5.61931e-66	0.551962	746	545	2.05358e-61	Up-regulated
COX2	Pig	6.09186e-66	0.721785	293	131	2.22627e-61	Up-regulated
FUT11	Pig	6.66604e-66	3.15122	86	9	2.4361e-61	Up-regulated
C9orf72	Pig	6.98249e-66	2.35118	127	29	2.55175e-61	Up-regulated
GSDME	Pig	7.43735e-66	0.899605	227	87	2.71798e-61	Up-regulated
PDHX	Pig	7.4868e-66	0.659345	397	209	2.73605e-61	Up-regulated
ENSSSCG00000035650	Pig	8.62213e-66	1.63083	148	0.04	3.15096e-61	Up-regulated
PEA15	Pig	1.09883e-65	2.22338	114	22	4.01566e-61	Up-regulated
RRAS	Pig	1.55983e-65	2.12681	108	19	5.70039e-61	Up-regulated
ABHD12	Pig	1.74464e-65	2.13937	141	37	6.37578e-61	Up-regulated
RASGRP1	Pig	1.77653e-65	4.81026	0.07	3	6.49231e-61	Up-regulated
NKTR	Pig	3.26835e-65	0.651047	0.56	342	1.19442e-60	Up-regulated
TMBIM6	Pig	3.38071e-65	1.23717	206	75	1.23548e-60	Up-regulated
CFAP94	Pig	3.46435e-65	1.16814	218	84	1.26605e-60	Up-regulated
PCF11	Pig	3.48676e-65	1.23442	0.26	113	1.27424e-60	Up-regulated
BMT2	Pig	3.85447e-65	0.745548	384	202	1.40862e-60	Up-regulated
CCDC197	Pig	3.99429e-65	3.48507	75	5	1.45971e-60	Up-regulated
CWF19L1	Pig	4.45922e-65	1.79531	148	41	1.62962e-60	Up-regulated
ATG5	Pig	4.49565e-65	0.953279	299	139	1.64293e-60	Up-regulated
LIFR	Pig	4.71607e-65	0.652016	0.54	337	1.72349e-60	Up-regulated
SLC35B3	Pig	5.01809e-65	1.97039	133	32	1.83386e-60	Up-regulated
MIGA1	Pig	5.08771e-65	0.677074	412	219	1.8593e-60	Up-regulated
DUSP4	Pig	7.03341e-65	5.71286	66	2	2.57036e-60	Up-regulated
ENSSSCG00000002449	Pig	7.53651e-65	2.377	108	19	2.75422e-60	Up-regulated
EEF2	Pig	8.87783e-65	1.13258	235	95	3.2444e-60	Up-regulated
XPC	Pig	9.22866e-65	1.04522	197	69	3.37261e-60	Up-regulated
RTN4IP1	Pig	9.30965e-65	1.00426	181	59	3.40221e-60	Up-regulated
MYL12A	Pig	1.02298e-64	1.43438	204	77	3.73847e-60	Up-regulated
NARS1	Pig	1.02634e-64	0.939866	228	88	3.75077e-60	Up-regulated
ENSSSCG00000049961	Pig	1.15997e-64	1.58245	152	43	4.2391e-60	Up-regulated
CTNNB1	Pig	1.19639e-64	0.630013	475	274	4.37222e-60	Up-regulated
OXSR1	Pig	1.35325e-64	0.739225	363	182	4.94544e-60	Up-regulated
MASP2	Pig	1.53063e-64	3.49997	78	6	5.59369e-60	Up-regulated
NMD3	Pig	1.85469e-64	0.695515	378	195	6.77798e-60	Up-regulated
TRPM6	Pig	1.99663e-64	2.81927	95	14	7.29669e-60	Up-regulated
CAT	Pig	2.2139e-64	1.33607	172	55	8.09071e-60	Up-regulated
TAOK3	Pig	3.23288e-64	1.62601	172	56	1.18146e-59	Up-regulated
UBE2D3	Pig	3.33096e-64	0.839871	343	0.17	1.2173e-59	Up-regulated
NPC1	Pig	3.79064e-64	2.19738	109	0.02	1.38529e-59	Up-regulated
GHITM	Pig	3.88681e-64	0.955256	274	121	1.42044e-59	Up-regulated
CASP7	Pig	4.06265e-64	1.91074	0.13	32	1.4847e-59	Up-regulated
CCN1	Pig	4.12494e-64	1.02977	224	88	1.50746e-59	Up-regulated
IRF2	Pig	4.15232e-64	0.861643	399	216	1.51747e-59	Up-regulated
MYSM1	Pig	4.18916e-64	0.66088	455	258	1.53093e-59	Up-regulated
ENSSSCG00000010734	Pig	4.80942e-64	1.33164	166	51	1.7576e-59	Up-regulated
VPS13D	Pig	5.41953e-64	0.736977	554	0.35	1.98057e-59	Up-regulated
MRRF	Pig	5.52094e-64	1.13293	184	62	2.01763e-59	Up-regulated
ENSSSCG00000032060	Pig	5.55626e-64	2.43437	89	11	2.03053e-59	Up-regulated
ARHGEF26	Pig	5.61877e-64	2.16714	117	25	2.05338e-59	Up-regulated
ARL6IP5	Pig	6.90781e-64	1.0459	269	119	2.52446e-59	Up-regulated
RPS5	Pig	7.55408e-64	1.94346	127	0.03	2.76064e-59	Up-regulated
PDE5A	Pig	7.78867e-64	2.21361	115	24	2.84637e-59	Up-regulated
PUS10	Pig	8.32554e-64	0.875913	263	113	3.04257e-59	Up-regulated
MTA3	Pig	8.67112e-64	1.21205	236	97	3.16886e-59	Up-regulated
FAM13C	Pig	8.9967e-64	1.76061	141	38	3.28785e-59	Up-regulated
ENSSSCG00000001970	Pig	9.02833e-64	1.70303	152	44	3.2994e-59	Up-regulated
DPYD	Pig	9.67984e-64	1.02675	425	265	3.5375e-59	Up-regulated
RCOR3	Pig	1.08774e-63	0.644572	459	259	3.97513e-59	Up-regulated
ZDHHC17	Pig	1.17616e-63	0.622313	0.57	361	4.29827e-59	Up-regulated
KIDINS220	Pig	1.18532e-63	0.692777	442	246	4.33175e-59	Up-regulated
NSD3	Pig	1.40994e-63	0.663072	498	293	5.15264e-59	Up-regulated
CIAO2A	Pig	1.52637e-63	1.48719	151	43	5.57812e-59	Up-regulated
ARHGAP31	Pig	1.75729e-63	1.13817	245	103	6.42201e-59	Up-regulated
CHM	Pig	1.77258e-63	0.950658	235	95	6.4779e-59	Up-regulated
ODR4	Pig	1.84546e-63	0.891987	303	142	6.74424e-59	Up-regulated
MCPH1	Pig	2.25423e-63	1.63399	148	42	8.23809e-59	Up-regulated
GAN	Pig	2.49485e-63	1.17307	239	99	9.11744e-59	Up-regulated
SLC35A5	Pig	3.03401e-63	2.18322	112	23	1.10878e-58	Up-regulated
NELL2	Pig	3.17195e-63	2.8147	0.09	12	1.15919e-58	Up-regulated
C20orf194	Pig	3.17804e-63	0.926524	332	167	1.16141e-58	Up-regulated
ZNF143	Pig	3.44704e-63	1.21748	212	81	1.25972e-58	Up-regulated
ERO1B	Pig	3.47198e-63	1.70434	148	42	1.26884e-58	Up-regulated
SRXN1	Pig	4.33453e-63	4.85617	67	2	1.58405e-58	Up-regulated
RAB6A	Pig	4.58521e-63	0.813737	351	178	1.67567e-58	Up-regulated
ENSSSCG00000015083	Pig	5.67379e-63	8.09364	0.06	0	2.07349e-58	Up-regulated
ZFP82	Pig	7.45039e-63	2.439	0.1	16	2.72275e-58	Up-regulated
RALY	Pig	8.15276e-63	0.90795	322	158	2.97942e-58	Up-regulated
CMTM8	Pig	9.97801e-63	9.03038	0.06	0	3.64646e-58	Up-regulated
KAZN	Pig	1.01236e-62	3.75145	72	5	3.69965e-58	Up-regulated
ENSSSCG00000038633	Pig	1.01973e-62	1.72237	128	31	3.72661e-58	Up-regulated
KATNAL1	Pig	1.07559e-62	0.676791	473	275	3.93075e-58	Up-regulated
CACUL1	Pig	1.08231e-62	0.855036	271	0.12	3.9553e-58	Up-regulated
CCT6B	Pig	1.21698e-62	2.29832	93	13	4.44745e-58	Up-regulated
VPS26C	Pig	1.29832e-62	1.23729	217	84	4.74472e-58	Up-regulated
NOCT	Pig	1.45978e-62	1.02009	227	91	5.33476e-58	Up-regulated
DPP3	Pig	1.67828e-62	3.79627	75	6	6.13328e-58	Up-regulated
ACCSL	Pig	1.7837e-62	0.860266	225	88	6.51853e-58	Up-regulated
ENSSSCG00000034844	Pig	1.78915e-62	1.27018	185	64	6.53845e-58	Up-regulated
ABI3BP	Pig	2.54739e-62	5.63239	65	2	9.30943e-58	Up-regulated
ENSSSCG00000032129	Pig	2.71483e-62	0.983826	277	127	9.92134e-58	Up-regulated
RPL7	Pig	3.82673e-62	3.51303	78	7	1.39848e-57	Up-regulated
ENSSSCG00000004583	Pig	4.66555e-62	1.22784	177	59	1.70503e-57	Up-regulated
ENSSSCG00000014600	Pig	5.00139e-62	1.5294	169	56	1.82776e-57	Up-regulated
MBD2	Pig	5.97032e-62	1.07435	227	92	2.18185e-57	Up-regulated
ENSSSCG00000009138	Pig	6.03748e-62	2.39401	97	16	2.2064e-57	Up-regulated
ENSSSCG00000032311	Pig	6.50707e-62	1.98614	106	0.02	2.37801e-57	Up-regulated
EYA4	Pig	8.18002e-62	0.936204	255	113	2.98939e-57	Up-regulated
ITGA7	Pig	1.1513e-61	0.620545	299	139	4.20744e-57	Up-regulated
ANKMY2	Pig	1.22139e-61	1.44335	152	45	4.46357e-57	Up-regulated
CRPPA	Pig	1.41986e-61	0.690425	362	188	5.18886e-57	Up-regulated
MARS2	Pig	1.78771e-61	2.05442	118	27	6.53318e-57	Up-regulated
TRIM44	Pig	1.85413e-61	0.62652	557	355	6.77592e-57	Up-regulated
ENSSSCG00000043835	Pig	1.89018e-61	1.6126	121	28	6.90767e-57	Up-regulated
FAM91A1	Pig	1.99574e-61	1.01064	242	102	7.29342e-57	Up-regulated
ANXA4	Pig	2.12076e-61	0.691633	333	165	7.75031e-57	Up-regulated
ENSSSCG00000006156	Pig	2.17982e-61	2.37212	102	18	7.96614e-57	Up-regulated
MAP4K4	Pig	2.59005e-61	1.06205	252	0.11	9.46536e-57	Up-regulated
NMRAL1	Pig	2.85724e-61	0.829958	302	144	1.04418e-56	Up-regulated
MRPL3	Pig	2.8658e-61	0.928474	234	96	1.04731e-56	Up-regulated
TSPAN2	Pig	3.03928e-61	3.29639	75	6	1.11071e-56	Up-regulated
GJC1	Pig	3.05626e-61	4.31235	68	4	1.11691e-56	Up-regulated
DNAJC6	Pig	3.16842e-61	2.68153	95	15	1.1579e-56	Up-regulated
TPI1	Pig	3.43817e-61	1.01766	0.17	55	1.25648e-56	Up-regulated
C15orf61	Pig	3.50176e-61	2.27185	93	14	1.27972e-56	Up-regulated
ENSSSCG00000006081	Pig	3.82673e-61	2.45785	101	18	1.39848e-56	Up-regulated
UGP2	Pig	4.52299e-61	0.964909	0.24	101	1.65293e-56	Up-regulated
ZNF624	Pig	6.05915e-61	1.4593	0.18	63	2.21432e-56	Up-regulated
PNPLA8	Pig	6.18844e-61	0.63144	329	163	2.26156e-56	Up-regulated
ZRANB3	Pig	6.28385e-61	1.25246	172	57	2.29643e-56	Up-regulated
RRAGB	Pig	6.70896e-61	1.22185	175	59	2.45179e-56	Up-regulated
ZMAT3	Pig	8.83045e-61	2.0318	104	0.02	3.22709e-56	Up-regulated
ANGEL2	Pig	9.49315e-61	1.0644	236	98	3.46927e-56	Up-regulated
DOP1A	Pig	1.06025e-60	0.865926	335	168	3.8747e-56	Up-regulated
SPATA1	Pig	1.12901e-60	1.38141	167	55	4.12595e-56	Up-regulated
FAM110C	Pig	1.20279e-60	1.51148	0.14	39	4.3956e-56	Up-regulated
PUM1	Pig	1.63449e-60	0.605698	626	432	5.97325e-56	Up-regulated
SNX27	Pig	1.66431e-60	0.934859	282	131	6.0822e-56	Up-regulated
ZFC3H1	Pig	1.82948e-60	0.618784	482	284	6.68584e-56	Up-regulated
COMMD10	Pig	1.89647e-60	0.776841	329	165	6.93064e-56	Up-regulated
ENSSSCG00000012262	Pig	1.94517e-60	0.567746	686	511	7.10862e-56	Up-regulated
ABHD5	Pig	2.02073e-60	1.38722	147	43	7.38476e-56	Up-regulated
RC3H1	Pig	2.02775e-60	0.637455	536	337	7.41039e-56	Up-regulated
SHOC2	Pig	2.02876e-60	0.725396	0.36	187	7.41411e-56	Up-regulated
LGMN	Pig	2.13301e-60	3.2933	78	8	7.79509e-56	Up-regulated
PPP4R2	Pig	2.53017e-60	0.696782	333	167	9.24649e-56	Up-regulated
CDKAL1	Pig	2.65172e-60	0.513054	699	508	9.69071e-56	Up-regulated
VASH2	Pig	3.01712e-60	4.24812	0.07	5	1.10261e-55	Up-regulated
ENSSSCG00000043963	Pig	3.14857e-60	3.41113	0.07	5	1.15064e-55	Up-regulated
ENSSSCG00000036877	Pig	3.63073e-60	1.48188	142	0.04	1.32685e-55	Up-regulated
APLF	Pig	4.62653e-60	1.55316	152	46	1.69077e-55	Up-regulated
TSPAN9	Pig	5.67989e-60	0.732323	297	0.14	2.07571e-55	Up-regulated
ATP6V1A	Pig	6.24454e-60	1.29231	175	0.06	2.28207e-55	Up-regulated
ZNF277	Pig	6.26016e-60	0.860295	289	135	2.28777e-55	Up-regulated
DNAJB9	Pig	7.13343e-60	2.44719	91	14	2.60691e-55	Up-regulated
POC5	Pig	8.16545e-60	1.49649	144	41	2.98406e-55	Up-regulated
TRIM2	Pig	1.00763e-59	0.533134	0.46	0.26	3.6824e-55	Up-regulated
KCTD8	Pig	1.0169e-59	3.01359	89	13	3.71626e-55	Up-regulated
NHLRC2	Pig	1.12132e-59	0.513398	657	461	4.09788e-55	Up-regulated
RAB11FIP2	Pig	1.19594e-59	1.25324	197	74	4.37056e-55	Up-regulated
EDEM3	Pig	1.2103e-59	1.12443	203	77	4.42303e-55	Up-regulated
POT1	Pig	1.22775e-59	1.66432	137	38	4.4868e-55	Up-regulated
BRWD3	Pig	1.38476e-59	1.1791	218	88	5.06059e-55	Up-regulated
COX5A	Pig	1.41421e-59	0.504169	456	259	5.16823e-55	Up-regulated
YIPF1	Pig	1.44242e-59	1.44707	173	59	5.27133e-55	Up-regulated
PIK3CB	Pig	1.53322e-59	0.921048	315	156	5.60316e-55	Up-regulated
TMEM33	Pig	1.71704e-59	1.51104	144	42	6.27493e-55	Up-regulated
ETFRF1	Pig	2.513e-59	1.09779	182	65	9.18377e-55	Up-regulated
ENSSSCG00000028461	Pig	2.80369e-59	1.08847	228	94	1.02461e-54	Up-regulated
SETD5	Pig	3.32966e-59	0.576686	677	485	1.21682e-54	Up-regulated
FH	Pig	3.34552e-59	1.22458	178	62	1.22262e-54	Up-regulated
IFT74	Pig	4.18118e-59	1.57759	142	41	1.52801e-54	Up-regulated
NTN1	Pig	4.92348e-59	6.01134	58	1	1.79928e-54	Up-regulated
TSGA10	Pig	5.46057e-59	1.41404	138	39	1.99557e-54	Up-regulated
TSPO	Pig	5.79663e-59	2.78346	78	8	2.11838e-54	Up-regulated
FARP1	Pig	5.82029e-59	0.836502	299	144	2.12702e-54	Up-regulated
ENSSSCG00000009633	Pig	7.18546e-59	5.58448	0.06	1	2.62593e-54	Up-regulated
NDUFB10	Pig	7.91541e-59	2.09992	101	19	2.89269e-54	Up-regulated
HPCAL1	Pig	8.04404e-59	2.81369	87	13	2.93969e-54	Up-regulated
ANKS4B	Pig	8.88399e-59	6.3653	58	1	3.24665e-54	Up-regulated
TRERF1	Pig	9.04458e-59	2.00678	132	36	3.30534e-54	Up-regulated
PDCD5	Pig	9.30417e-59	1.85484	118	28	3.40021e-54	Up-regulated
ZNF891	Pig	9.65863e-59	1.36674	127	32	3.52975e-54	Up-regulated
ARMC2	Pig	1.01591e-58	0.68805	415	235	3.71264e-54	Up-regulated
POSTN	Pig	1.10904e-58	1.62669	133	36	4.05298e-54	Up-regulated
NOTCH2	Pig	1.25773e-58	1.35434	205	83	4.59636e-54	Up-regulated
NDST3	Pig	1.33752e-58	0.934458	195	72	4.88797e-54	Up-regulated
EEF1A2	Pig	1.36202e-58	0.654325	437	245	4.97752e-54	Up-regulated
ZNF461	Pig	1.36607e-58	1.15263	174	61	4.99229e-54	Up-regulated
ENSSSCG00000036115	Pig	1.50453e-58	1.24753	187	69	5.49832e-54	Up-regulated
TRAF3IP2	Pig	1.53016e-58	0.996103	256	114	5.59198e-54	Up-regulated
BCL2L13	Pig	1.83838e-58	0.580592	521	316	6.71835e-54	Up-regulated
NAA30	Pig	1.91668e-58	1.29043	178	63	7.00451e-54	Up-regulated
ENSSSCG00000016687	Pig	2.21449e-58	1.51852	206	85	8.09286e-54	Up-regulated
CIPC	Pig	2.89501e-58	1.05927	0.21	83	1.05798e-53	Up-regulated
CARNMT1	Pig	2.9191e-58	1.10716	188	0.07	1.06678e-53	Up-regulated
SLCO2A1	Pig	3.32885e-58	3.5483	69	5	1.21653e-53	Up-regulated
STX18	Pig	3.54928e-58	0.805435	295	141	1.29708e-53	Up-regulated
MAP2K3	Pig	4.269e-58	1.25389	175	61	1.56011e-53	Up-regulated
ENSSSCG00000000207	Pig	4.37513e-58	2.7755	83	11	1.59889e-53	Up-regulated
C3orf62	Pig	4.44236e-58	7.04772	56	0	1.62346e-53	Up-regulated
BAG2	Pig	4.45849e-58	1.62664	0.12	29	1.62936e-53	Up-regulated
DOCK4	Pig	4.85042e-58	0.911446	302	153	1.77259e-53	Up-regulated
TRAK2	Pig	5.12047e-58	0.717731	314	156	1.87128e-53	Up-regulated
PPP1R14C	Pig	5.56952e-58	0.74851	0.31	152	2.03538e-53	Up-regulated
CYCS	Pig	6.30208e-58	0.933582	211	83	2.30309e-53	Up-regulated
PPARG	Pig	7.35959e-58	5.64349	58	1	2.68956e-53	Up-regulated
DNAJC15	Pig	7.41798e-58	1.29197	142	42	2.7109e-53	Up-regulated
PPP1R3E	Pig	8.48003e-58	1.63753	115	27	3.09903e-53	Up-regulated
SEC23B	Pig	8.53155e-58	2.21898	105	22	3.11786e-53	Up-regulated
NSF	Pig	9.58708e-58	0.522508	454	263	3.5036e-53	Up-regulated
C9orf40	Pig	1.07008e-57	4.22859	65	4	3.91061e-53	Up-regulated
SPCS3	Pig	1.76122e-57	1.25849	177	64	6.43638e-53	Up-regulated
TARDBP	Pig	2.18984e-57	1.03436	239	103	8.00276e-53	Up-regulated
GALNT2	Pig	3.07858e-57	0.660597	322	159	1.12507e-52	Up-regulated
CNTN3	Pig	3.58901e-57	7.16327	56	0	1.3116e-52	Up-regulated
BMP4	Pig	3.73595e-57	4.30726	68	5	1.3653e-52	Up-regulated
HNRNPU	Pig	4.54459e-57	0.638998	506	315	1.66082e-52	Up-regulated
ENSSSCG00000013715	Pig	5.4529e-57	1.07165	0.2	78	1.99276e-52	Up-regulated
ADAMTS12	Pig	5.92125e-57	5.64375	59	2	2.16392e-52	Up-regulated
C9orf64	Pig	7.25721e-57	2.09556	106	23	2.65215e-52	Up-regulated
DCX	Pig	9.55922e-57	1.58806	137	0.04	3.49342e-52	Up-regulated
WASHC4	Pig	1.01516e-56	1.0519	249	114	3.7099e-52	Up-regulated
IRAG1	Pig	1.1661e-56	0.542991	651	466	4.2615e-52	Up-regulated
ENSSSCG00000004404	Pig	1.2583e-56	6.42505	55	0	4.59845e-52	Up-regulated
ENSSSCG00000003520	Pig	1.36505e-56	0.836021	343	182	4.98858e-52	Up-regulated
ENSSSCG00000030801	Pig	1.45635e-56	3.66676	69	6	5.32224e-52	Up-regulated
CEP290	Pig	1.73468e-56	1.46968	126	33	6.33938e-52	Up-regulated
SP110	Pig	1.73976e-56	9.22893	54	0	6.35795e-52	Up-regulated
SRFBP1	Pig	1.82049e-56	1.02795	206	82	6.65297e-52	Up-regulated
HIBCH	Pig	2.05607e-56	0.51663	0.38	204	7.51392e-52	Up-regulated
IFT57	Pig	2.0772e-56	1.42322	169	59	7.59112e-52	Up-regulated
ATF5	Pig	2.28555e-56	4.01512	63	4	8.35255e-52	Up-regulated
MCCC1	Pig	2.64371e-56	0.563425	505	307	9.66145e-52	Up-regulated
ENSSSCG00000050320	Pig	2.73497e-56	1.51877	127	34	9.99495e-52	Up-regulated
OLFM1	Pig	2.97048e-56	4.45957	63	3	1.08556e-51	Up-regulated
PRKCE	Pig	3.08543e-56	0.740586	856	0.76	1.12757e-51	Up-regulated
DERA	Pig	3.1925e-56	1.26527	153	49	1.1667e-51	Up-regulated
PTGFR	Pig	3.47027e-56	2.89733	88	15	1.26821e-51	Up-regulated
FAM3C	Pig	3.90567e-56	1.67253	129	36	1.42733e-51	Up-regulated
CCDC50	Pig	4.06795e-56	1.032	249	114	1.48663e-51	Up-regulated
DUSP19	Pig	4.11058e-56	3.57664	67	5	1.50221e-51	Up-regulated
STAMBP	Pig	4.52753e-56	1.11601	186	0.07	1.65458e-51	Up-regulated
BTBD10	Pig	4.96081e-56	0.931889	202	0.08	1.81293e-51	Up-regulated
COBLL1	Pig	5.20182e-56	1.71079	138	41	1.90101e-51	Up-regulated
ENSSSCG00000015814	Pig	5.24515e-56	4.45153	58	2	1.91684e-51	Up-regulated
PHF20L1	Pig	6.24058e-56	0.622936	0.42	238	2.28062e-51	Up-regulated
OSGEPL1	Pig	7.04996e-56	0.693457	426	245	2.57641e-51	Up-regulated
CDC27	Pig	7.38166e-56	0.721267	401	225	2.69763e-51	Up-regulated
DCUN1D5	Pig	8.22943e-56	0.87747	198	77	3.00745e-51	Up-regulated
ZNF274	Pig	8.97843e-56	0.958715	258	118	3.28117e-51	Up-regulated
ENSSSCG00000004387	Pig	9.06162e-56	0.568523	736	0.57	3.31157e-51	Up-regulated
RPS3	Pig	9.83201e-56	1.58735	0.13	37	3.59311e-51	Up-regulated
SLC37A3	Pig	1.10602e-55	2.08144	108	24	4.04194e-51	Up-regulated
TMEM30A	Pig	1.14625e-55	1.09305	214	89	4.18896e-51	Up-regulated
ENSSSCG00000032456	Pig	1.17093e-55	3.12201	68	5	4.27916e-51	Up-regulated
ENSSSCG00000005453	Pig	1.31078e-55	3.04261	77	9	4.79026e-51	Up-regulated
ENSSSCG00000017103	Pig	1.34864e-55	3.65058	66	5	4.92859e-51	Up-regulated
NMRK2	Pig	1.37072e-55	0.842361	257	119	5.0093e-51	Up-regulated
ENSSSCG00000004307	Pig	1.3825e-55	1.01756	182	67	5.05234e-51	Up-regulated
CCDC170	Pig	1.40281e-55	3.81339	69	6	5.12656e-51	Up-regulated
TATDN1	Pig	1.50247e-55	1.07287	204	82	5.49077e-51	Up-regulated
ZNF207	Pig	1.61183e-55	0.540961	594	392	5.89045e-51	Up-regulated
ENSSSCG00000028035	Pig	1.76241e-55	0.569022	514	313	6.44074e-51	Up-regulated
ELOB	Pig	1.80111e-55	1.71042	123	33	6.58217e-51	Up-regulated
KANSL1	Pig	2.16141e-55	0.533892	728	549	7.89886e-51	Up-regulated
DCAKD	Pig	2.30785e-55	0.795758	382	211	8.43404e-51	Up-regulated
FAM204A	Pig	2.53076e-55	1.03247	179	66	9.24866e-51	Up-regulated
KIAA2026	Pig	2.75036e-55	0.63197	417	238	1.00512e-50	Up-regulated
ENSSSCG00000003421	Pig	2.76484e-55	4.14437	64	4	1.01041e-50	Up-regulated
CLOCK	Pig	2.82693e-55	0.515236	614	413	1.0331e-50	Up-regulated
PRMT9	Pig	3.06217e-55	1.00221	0.17	59	1.11907e-50	Up-regulated
ENSSSCG00000028414	Pig	3.29454e-55	0.598675	343	179	1.20399e-50	Up-regulated
NID2	Pig	3.507e-55	0.619746	611	0.42	1.28163e-50	Up-regulated
CLINT1	Pig	3.68896e-55	0.689621	0.33	0.17	1.34813e-50	Up-regulated
FABP3	Pig	3.73387e-55	0.797311	407	237	1.36454e-50	Up-regulated
ZNF827	Pig	4.03165e-55	0.500381	589	383	1.47337e-50	Up-regulated
IER5	Pig	4.73432e-55	2.60467	79	11	1.73016e-50	Up-regulated
REV3L	Pig	4.89484e-55	0.670848	556	374	1.78882e-50	Up-regulated
NDUFA2	Pig	5.0395e-55	1.49133	125	34	1.84169e-50	Up-regulated
SMIM7	Pig	5.3079e-55	1.19196	198	79	1.93977e-50	Up-regulated
PSMA3	Pig	5.47258e-55	0.844296	251	114	1.99995e-50	Up-regulated
MAP3K7	Pig	5.52217e-55	0.971876	206	83	2.01808e-50	Up-regulated
CCDC12	Pig	5.56491e-55	1.03975	233	102	2.0337e-50	Up-regulated
MOV10	Pig	5.95157e-55	4.42344	62	4	2.175e-50	Up-regulated
FAM199X	Pig	6.30301e-55	1.88832	113	27	2.30343e-50	Up-regulated
SAMD8	Pig	6.31059e-55	0.84787	0.29	142	2.30621e-50	Up-regulated
ARMC1	Pig	6.84592e-55	1.15637	152	49	2.50184e-50	Up-regulated
ZFP36L1	Pig	8.77545e-55	4.87835	58	2	3.20699e-50	Up-regulated
RFC5	Pig	8.94418e-55	1.34381	142	44	3.26865e-50	Up-regulated
ENSSSCG00000027115	Pig	1.02692e-54	0.759938	342	179	3.75287e-50	Up-regulated
GIGYF2	Pig	1.14895e-54	0.547571	523	322	4.19884e-50	Up-regulated
DCBLD1	Pig	1.15543e-54	1.7458	126	35	4.22252e-50	Up-regulated
AKAP1	Pig	1.20113e-54	0.763912	198	78	4.38954e-50	Up-regulated
GLRA1	Pig	1.33398e-54	1.43784	121	32	4.87503e-50	Up-regulated
COX7A2	Pig	1.3518e-54	1.4438	0.15	0.05	4.94016e-50	Up-regulated
ENSSSCG00000016527	Pig	1.451e-54	2.5296	82	12	5.30269e-50	Up-regulated
FAM76A	Pig	1.49014e-54	1.05949	251	116	5.44573e-50	Up-regulated
RPL28	Pig	1.63258e-54	2.64694	81	12	5.96627e-50	Up-regulated
TENT2	Pig	1.6888e-54	0.64696	0.5	0.31	6.17173e-50	Up-regulated
NEK11	Pig	1.99869e-54	0.900035	0.19	73	7.30423e-50	Up-regulated
SENP6	Pig	2.27512e-54	0.556379	0.66	466	8.31441e-50	Up-regulated
KPNB1	Pig	2.5385e-54	1.02449	195	77	9.27696e-50	Up-regulated
DOT1L	Pig	2.62448e-54	0.97743	223	96	9.59116e-50	Up-regulated
GATB	Pig	2.97552e-54	0.710442	254	115	1.0874e-49	Up-regulated
PTK2B	Pig	4.02031e-54	3.30514	69	7	1.46922e-49	Up-regulated
NGLY1	Pig	4.11201e-54	0.769485	0.28	136	1.50274e-49	Up-regulated
SLC16A4	Pig	4.98882e-54	3.83505	64	5	1.82317e-49	Up-regulated
STX17	Pig	4.99486e-54	0.596619	405	227	1.82537e-49	Up-regulated
WSB2	Pig	5.41291e-54	1.13567	211	89	1.97815e-49	Up-regulated
NDUFA1	Pig	6.00397e-54	1.95032	113	28	2.19415e-49	Up-regulated
ENSSSCG00000014910	Pig	6.11936e-54	9.10937	51	0	2.23632e-49	Up-regulated
SPSB1	Pig	6.79025e-54	2.1805	102	22	2.4815e-49	Up-regulated
SAMHD1	Pig	6.89744e-54	1.21253	164	58	2.52067e-49	Up-regulated
ENSSSCG00000024268	Pig	9.21664e-54	5.54154	54	1	3.36822e-49	Up-regulated
PTPN9	Pig	1.04876e-53	1.00074	292	0.15	3.8327e-49	Up-regulated
SESTD1	Pig	1.07109e-53	0.676451	477	0.3	3.91428e-49	Up-regulated
ENSSSCG00000044615	Pig	1.15386e-53	2.77573	73	9	4.2168e-49	Up-regulated
IDH3A	Pig	1.20789e-53	0.502299	0.35	183	4.41424e-49	Up-regulated
PIP5K1A	Pig	1.45962e-53	0.822912	316	164	5.33418e-49	Up-regulated
HSPBAP1	Pig	1.61628e-53	1.59122	138	43	5.9067e-49	Up-regulated
VIRMA	Pig	1.63002e-53	0.62835	359	192	5.95691e-49	Up-regulated
ZNF566	Pig	1.67052e-53	1.46328	0.11	27	6.10491e-49	Up-regulated
ELP3	Pig	1.67094e-53	0.945583	195	77	6.10645e-49	Up-regulated
SLC16A3	Pig	1.93782e-53	2.87168	65	5	7.08175e-49	Up-regulated
GCC2	Pig	2.03818e-53	0.941464	216	91	7.44852e-49	Up-regulated
TERF2IP	Pig	2.56451e-53	1.00823	193	77	9.37201e-49	Up-regulated
LIMD1	Pig	2.7873e-53	0.659955	487	0.3	1.01862e-48	Up-regulated
PTER	Pig	2.82121e-53	5.14541	56	2	1.03101e-48	Up-regulated
KLHDC10	Pig	3.16774e-53	0.826129	278	135	1.15765e-48	Up-regulated
NDUFB7	Pig	3.20949e-53	1.99988	98	21	1.17291e-48	Up-regulated
ENY2	Pig	3.21924e-53	1.32437	137	42	1.17647e-48	Up-regulated
ZNF599	Pig	3.58174e-53	1.53903	138	43	1.30895e-48	Up-regulated
CCDC90B	Pig	3.64138e-53	0.926854	197	79	1.33074e-48	Up-regulated
GATA4	Pig	3.76294e-53	0.506544	673	476	1.37517e-48	Up-regulated
IMPA1	Pig	3.8179e-53	1.27791	125	35	1.39525e-48	Up-regulated
PIGU	Pig	3.91933e-53	0.608399	305	154	1.43232e-48	Up-regulated
TRMT1L	Pig	4.0247e-53	0.588291	0.38	0.21	1.47083e-48	Up-regulated
ENSSSCG00000010517	Pig	4.66205e-53	1.0579	156	53	1.70375e-48	Up-regulated
MGLL	Pig	4.80013e-53	0.828411	292	147	1.75421e-48	Up-regulated
THUMPD2	Pig	4.80958e-53	0.814119	251	115	1.75766e-48	Up-regulated
RPS2	Pig	5.37831e-53	1.2161	215	95	1.9655e-48	Up-regulated
DHX9	Pig	5.54954e-53	0.854004	329	177	2.02808e-48	Up-regulated
CAMK1	Pig	5.76858e-53	3.59808	61	4	2.10813e-48	Up-regulated
ATP5F1C	Pig	8.19233e-53	0.543371	295	145	2.99389e-48	Up-regulated
WASHC3	Pig	9.08686e-53	0.739242	349	189	3.32079e-48	Up-regulated
ENSSSCG00000031169	Pig	9.97086e-53	0.715526	275	132	3.64385e-48	Up-regulated
ENSSSCG00000039658	Pig	1.4117e-52	2.04939	109	27	5.15905e-48	Up-regulated
AVL9	Pig	1.41694e-52	0.785541	282	137	5.17821e-48	Up-regulated
FNBP1	Pig	1.65649e-52	1.54028	0.15	51	6.05363e-48	Up-regulated
UFSP2	Pig	1.68898e-52	0.931813	209	88	6.17239e-48	Up-regulated
NDUFB3	Pig	1.69628e-52	0.627627	284	138	6.19907e-48	Up-regulated
PTPN11	Pig	2.30706e-52	0.859554	264	125	8.43116e-48	Up-regulated
ORC3	Pig	2.30837e-52	0.765091	286	143	8.43592e-48	Up-regulated
PPA1	Pig	2.36425e-52	3.28628	67	6	8.64014e-48	Up-regulated
HSPH1	Pig	2.41621e-52	3.39758	67	6	8.83004e-48	Up-regulated
FLVCR1	Pig	2.5848e-52	1.29223	149	0.05	9.44615e-48	Up-regulated
CSPP1	Pig	2.73636e-52	0.640988	0.44	263	1e-47	Up-regulated
SAP18	Pig	2.74864e-52	1.8896	94	19	1.00449e-47	Up-regulated
MPHOSPH9	Pig	2.88278e-52	0.699484	224	96	1.05351e-47	Up-regulated
MTAP	Pig	3.10134e-52	5.03029	55	2	1.13338e-47	Up-regulated
CD109	Pig	3.11994e-52	2.47815	84	14	1.14018e-47	Up-regulated
OMA1	Pig	3.46365e-52	0.942795	172	64	1.26579e-47	Up-regulated
MOSPD2	Pig	3.64917e-52	1.48208	121	33	1.33359e-47	Up-regulated
ENSSSCG00000014569	Pig	4.81005e-52	1.37293	178	0.07	1.75783e-47	Up-regulated
STON2	Pig	5.75614e-52	3.58874	57	3	2.10358e-47	Up-regulated
COMMD6	Pig	6.02238e-52	0.500029	838	692	2.20088e-47	Up-regulated
MFSD2B	Pig	6.69382e-52	2.32266	78	11	2.44626e-47	Up-regulated
DAAM1	Pig	6.78646e-52	0.603337	471	287	2.48011e-47	Up-regulated
DCLK2	Pig	8.9694e-52	0.92583	249	118	3.27787e-47	Up-regulated
ROCK1	Pig	9.81723e-52	0.580623	0.51	322	3.58771e-47	Up-regulated
FBXO4	Pig	1.04389e-51	0.713191	0.23	102	3.81489e-47	Up-regulated
ZC3HAV1	Pig	1.13219e-51	1.94589	109	28	4.13759e-47	Up-regulated
PPP1R36	Pig	1.13226e-51	2.12043	85	15	4.13784e-47	Up-regulated
MAP3K13	Pig	1.17625e-51	0.769546	233	103	4.29859e-47	Up-regulated
COX8A	Pig	1.2144e-51	1.47412	122	34	4.43801e-47	Up-regulated
CD58	Pig	1.22975e-51	0.799136	256	119	4.49411e-47	Up-regulated
ENSSSCG00000045560	Pig	1.23236e-51	1.5722	135	42	4.50365e-47	Up-regulated
RPRD1A	Pig	1.3234e-51	0.687106	349	188	4.83637e-47	Up-regulated
ENSSSCG00000036595	Pig	1.40823e-51	1.37789	131	0.04	5.14639e-47	Up-regulated
ENSSSCG00000039249	Pig	1.4182e-51	1.92104	0.12	34	5.18283e-47	Up-regulated
TACR2	Pig	1.50814e-51	4.17319	56	2	5.51149e-47	Up-regulated
ADPRM	Pig	1.51958e-51	0.993902	145	47	5.55329e-47	Up-regulated
WIPF2	Pig	1.71203e-51	0.883498	211	89	6.2566e-47	Up-regulated
HOOK3	Pig	2.21284e-51	0.504986	0.52	325	8.08681e-47	Up-regulated
PTBP2	Pig	2.26192e-51	0.679865	424	252	8.26618e-47	Up-regulated
PLEKHA4	Pig	2.33283e-51	3.6258	69	8	8.52532e-47	Up-regulated
PNKD	Pig	2.49742e-51	1.33682	144	48	9.12681e-47	Up-regulated
USP9X	Pig	2.66553e-51	0.567562	438	0.26	9.74118e-47	Up-regulated
CTSC	Pig	2.69003e-51	0.715151	681	533	9.83072e-47	Up-regulated
GTF3A	Pig	2.7285e-51	2.97833	71	9	9.97129e-47	Up-regulated
GBP2	Pig	2.72891e-51	1.1141	169	63	9.97282e-47	Up-regulated
MLH3	Pig	2.73006e-51	1.16476	171	64	9.97701e-47	Up-regulated
ENSSSCG00000038506	Pig	2.77206e-51	1.0639	194	79	1.01305e-46	Up-regulated
ENSSSCG00000002386	Pig	2.92084e-51	0.751791	328	172	1.06742e-46	Up-regulated
RNF128	Pig	3.00202e-51	0.970269	209	89	1.09709e-46	Up-regulated
ENSSSCG00000017509	Pig	3.68713e-51	2.40365	88	17	1.34746e-46	Up-regulated
USP8	Pig	3.96942e-51	0.787134	0.27	131	1.45063e-46	Up-regulated
RDH14	Pig	5.06426e-51	2.24314	96	21	1.85074e-46	Up-regulated
SLC25A20	Pig	5.3296e-51	1.45746	128	38	1.9477e-46	Up-regulated
PLAAT3	Pig	5.35357e-51	1.62175	152	54	1.95646e-46	Up-regulated
RUNX2	Pig	5.40922e-51	1.69855	106	26	1.9768e-46	Up-regulated
TFB1M	Pig	5.42667e-51	0.635948	273	132	1.98318e-46	Up-regulated
CCNY	Pig	5.65925e-51	0.504457	741	583	2.06817e-46	Up-regulated
EPRS1	Pig	5.75636e-51	0.591068	314	161	2.10366e-46	Up-regulated
JKAMP	Pig	5.90542e-51	1.95664	0.09	18	2.15814e-46	Up-regulated
UHMK1	Pig	5.95875e-51	1.61282	117	32	2.17763e-46	Up-regulated
ENSSSCG00000011603	Pig	6.30712e-51	2.03273	99	23	2.30494e-46	Up-regulated
NCOA2	Pig	8.25492e-51	0.56905	693	524	3.01676e-46	Up-regulated
SNX10	Pig	8.68083e-51	4.6045	56	3	3.17241e-46	Up-regulated
BPNT1	Pig	9.0482e-51	1.00777	0.14	45	3.30667e-46	Up-regulated
CCDC9B	Pig	9.07016e-51	1.43733	108	27	3.31469e-46	Up-regulated
ENSSSCG00000014132	Pig	9.55576e-51	1.14633	131	0.04	3.49215e-46	Up-regulated
XRN2	Pig	1.00631e-50	0.607216	406	232	3.67757e-46	Up-regulated
PHF6	Pig	1.26387e-50	1.10615	156	55	4.61881e-46	Up-regulated
NCOA3	Pig	1.2702e-50	0.667689	354	198	4.64195e-46	Up-regulated
CHKA	Pig	1.3354e-50	1.0105	217	95	4.88021e-46	Up-regulated
EFCAB7	Pig	1.35436e-50	1.24057	132	0.04	4.9495e-46	Up-regulated
CCDC66	Pig	1.48976e-50	0.672055	315	163	5.44433e-46	Up-regulated
MAPKAP1	Pig	1.67806e-50	0.545192	525	334	6.13248e-46	Up-regulated
ANAPC1	Pig	1.72537e-50	0.907622	206	87	6.30535e-46	Up-regulated
AKR1B1	Pig	1.86929e-50	0.754781	264	127	6.83134e-46	Up-regulated
C7H6orf125	Pig	1.9333e-50	1.55006	122	36	7.06523e-46	Up-regulated
LANCL2	Pig	2.10994e-50	0.664646	317	164	7.71079e-46	Up-regulated
MACROH2A1	Pig	2.34816e-50	0.781203	313	163	8.58136e-46	Up-regulated
NR3C1	Pig	2.35468e-50	0.552873	563	379	8.60518e-46	Up-regulated
DBI	Pig	2.46461e-50	2.93578	68	8	9.00691e-46	Up-regulated
HHAT	Pig	2.73188e-50	1.66108	114	31	9.98364e-46	Up-regulated
CKB	Pig	2.81802e-50	4.95646	51	1	1.02985e-45	Up-regulated
AIFM1	Pig	2.85576e-50	0.788563	258	123	1.04364e-45	Up-regulated
ZMYND11	Pig	2.87235e-50	0.5278	548	357	1.0497e-45	Up-regulated
FAM20A	Pig	3.00741e-50	3.49764	63	6	1.09906e-45	Up-regulated
GPATCH2	Pig	3.41958e-50	0.646908	367	204	1.24969e-45	Up-regulated
TNPO1	Pig	3.86758e-50	0.596635	0.49	309	1.41341e-45	Up-regulated
ENSSSCG00000016542	Pig	4.0211e-50	0.547993	253	118	1.46951e-45	Up-regulated
ABHD17C	Pig	4.12221e-50	1.43599	0.13	0.04	1.50646e-45	Up-regulated
TIMM8B	Pig	4.21997e-50	1.61507	131	41	1.54219e-45	Up-regulated
ENSSSCG00000041783	Pig	5.18101e-50	1.27599	127	38	1.8934e-45	Up-regulated
FAM102A	Pig	5.42211e-50	1.97447	0.11	29	1.98151e-45	Up-regulated
CRYBG1	Pig	6.10532e-50	1.52138	117	33	2.23119e-45	Up-regulated
INPP4A	Pig	6.75402e-50	2.62646	0.08	14	2.46826e-45	Up-regulated
EIF4E	Pig	7.55899e-50	0.719429	362	202	2.76243e-45	Up-regulated
PIGK	Pig	7.73952e-50	0.813612	202	85	2.82841e-45	Up-regulated
ESF1	Pig	8.63761e-50	0.543566	341	184	3.15662e-45	Up-regulated
ENSSSCG00000035000	Pig	1.09812e-49	1.40484	115	32	4.01307e-45	Up-regulated
DHX29	Pig	1.20599e-49	0.763723	222	98	4.40727e-45	Up-regulated
REL	Pig	1.61471e-49	0.715648	251	118	5.90096e-45	Up-regulated
TEAD4	Pig	1.62678e-49	0.934651	167	63	5.94508e-45	Up-regulated
USP31	Pig	1.64376e-49	2.0364	101	24	6.00711e-45	Up-regulated
MPP4	Pig	1.78182e-49	2.74246	71	9	6.51167e-45	Up-regulated
CCNT2	Pig	1.82163e-49	0.534452	499	317	6.65714e-45	Up-regulated
MAP4K5	Pig	1.82339e-49	0.572911	401	0.23	6.66357e-45	Up-regulated
ENSSSCG00000009303	Pig	2.51829e-49	2.15282	0.09	19	9.20309e-45	Up-regulated
PPIL3	Pig	2.55342e-49	2.1212	88	18	9.33146e-45	Up-regulated
NSUN6	Pig	2.5808e-49	0.62066	308	0.16	9.43152e-45	Up-regulated
COX5B	Pig	2.63263e-49	0.978594	213	94	9.62096e-45	Up-regulated
ENSSSCG00000038327	Pig	2.65744e-49	1.77403	99	23	9.71161e-45	Up-regulated
GNB5	Pig	2.6903e-49	1.58484	131	41	9.83169e-45	Up-regulated
ZNF24	Pig	2.84867e-49	0.771092	227	102	1.04105e-44	Up-regulated
SPATS2	Pig	3.22255e-49	0.803041	228	103	1.17768e-44	Up-regulated
NUDT13	Pig	3.52011e-49	2.44988	85	16	1.28642e-44	Up-regulated
ENSSSCG00000024660	Pig	3.58352e-49	6.98544	49	1	1.3096e-44	Up-regulated
PTGES3	Pig	3.94475e-49	0.730308	298	154	1.44161e-44	Up-regulated
IPO8	Pig	4.58495e-49	0.74277	215	93	1.67557e-44	Up-regulated
TAF4B	Pig	4.88681e-49	1.33475	132	42	1.78588e-44	Up-regulated
VARS1	Pig	4.95902e-49	1.30615	133	43	1.81228e-44	Up-regulated
ENSSSCG00000049039	Pig	5.09398e-49	1.54826	118	34	1.86159e-44	Up-regulated
CD80	Pig	5.34826e-49	1.87569	82	15	1.95452e-44	Up-regulated
GTF2I	Pig	6.1698e-49	0.57722	481	297	2.25475e-44	Up-regulated
ANKFY1	Pig	6.41011e-49	0.563767	0.57	378	2.34258e-44	Up-regulated
VGLL4	Pig	6.65537e-49	0.62299	382	218	2.4322e-44	Up-regulated
TRAPPC5	Pig	6.76271e-49	4.19612	54	3	2.47143e-44	Up-regulated
DNAH12	Pig	7.23606e-49	2.69628	71	0.01	2.64442e-44	Up-regulated
SLC12A2	Pig	9.38105e-49	0.948841	216	97	3.4283e-44	Up-regulated
KCTD6	Pig	1.03088e-48	0.862334	176	69	3.76736e-44	Up-regulated
MYOM3	Pig	1.06336e-48	0.623911	314	165	3.88604e-44	Up-regulated
MFN1	Pig	1.1423e-48	0.57926	333	179	4.17455e-44	Up-regulated
ENSSSCG00000009348	Pig	1.16919e-48	0.926089	207	0.09	4.27281e-44	Up-regulated
ENSSSCG00000008942	Pig	1.17157e-48	0.707914	306	0.16	4.28149e-44	Up-regulated
DDX18	Pig	1.41014e-48	0.789362	183	74	5.15337e-44	Up-regulated
CASD1	Pig	1.52689e-48	0.811987	0.25	0.12	5.58003e-44	Up-regulated
FRMD6	Pig	1.69841e-48	3.38295	64	7	6.20685e-44	Up-regulated
RAB3GAP2	Pig	2.04004e-48	0.526199	482	297	7.45531e-44	Up-regulated
EYA3	Pig	2.10919e-48	0.522378	382	218	7.70804e-44	Up-regulated
ASCC2	Pig	2.23081e-48	1.40073	132	42	8.15251e-44	Up-regulated
ENSSSCG00000006206	Pig	2.46594e-48	0.819959	267	134	9.01177e-44	Up-regulated
SEC23IP	Pig	2.5503e-48	0.782748	195	81	9.32007e-44	Up-regulated
HIGD2A	Pig	2.5602e-48	2.24799	79	14	9.35624e-44	Up-regulated
GDI2	Pig	2.67221e-48	0.828313	0.21	91	9.76559e-44	Up-regulated
APLP2	Pig	2.74311e-48	0.653511	337	184	1.00247e-43	Up-regulated
EFL1	Pig	2.8704e-48	0.550253	347	0.19	1.04899e-43	Up-regulated
P2RX4	Pig	3.24456e-48	3.30549	61	6	1.18572e-43	Up-regulated
FGF9	Pig	3.41942e-48	2.85966	0.06	5	1.24963e-43	Up-regulated
NKX2-5	Pig	3.7429e-48	2.34811	78	13	1.36784e-43	Up-regulated
ZNF518A	Pig	3.80092e-48	1.4883	125	39	1.38904e-43	Up-regulated
EGR1	Pig	4.19519e-48	9.71728	46	0	1.53313e-43	Up-regulated
YARS2	Pig	4.26453e-48	1.46933	119	35	1.55847e-43	Up-regulated
ENSSSCG00000030849	Pig	4.31531e-48	2.94433	63	7	1.57703e-43	Up-regulated
CCDC14	Pig	4.89349e-48	0.775604	289	0.15	1.78833e-43	Up-regulated
ODF2	Pig	5.67335e-48	1.54859	129	41	2.07333e-43	Up-regulated
PAPOLG	Pig	6.25816e-48	0.656957	244	115	2.28705e-43	Up-regulated
GPBP1	Pig	7.5051e-48	0.555388	0.45	274	2.74274e-43	Up-regulated
FAM214B	Pig	8.29431e-48	1.7377	88	18	3.03115e-43	Up-regulated
UTP6	Pig	8.57737e-48	1.5633	103	26	3.1346e-43	Up-regulated
RGS3	Pig	8.7728e-48	7.23456	47	0	3.20602e-43	Up-regulated
UPP1	Pig	9.53001e-48	4.75188	49	1	3.48274e-43	Up-regulated
YWHAB	Pig	9.65682e-48	1.23959	158	59	3.52908e-43	Up-regulated
DCP1B	Pig	1.05028e-47	0.66359	279	142	3.83827e-43	Up-regulated
DENND3	Pig	1.26084e-47	4.33056	53	3	4.60776e-43	Up-regulated
PYGO1	Pig	1.30562e-47	4.68965	52	2	4.77137e-43	Up-regulated
ENPP2	Pig	1.38679e-47	1.88392	88	19	5.06804e-43	Up-regulated
C11orf52	Pig	1.43584e-47	2.40194	65	7	5.24728e-43	Up-regulated
RALGPS2	Pig	1.61931e-47	2.02229	98	24	5.91779e-43	Up-regulated
CAMSAP2	Pig	1.65707e-47	0.826911	233	108	6.05575e-43	Up-regulated
CRLF3	Pig	1.68397e-47	2.54932	0.08	15	6.15407e-43	Up-regulated
EIF2AK3	Pig	2.03989e-47	0.746498	296	155	7.45478e-43	Up-regulated
ACOT12	Pig	2.07361e-47	3.84056	54	3	7.57801e-43	Up-regulated
ZBTB44	Pig	2.20481e-47	0.538223	393	226	8.05747e-43	Up-regulated
PPA2	Pig	2.21093e-47	0.632901	329	179	8.07986e-43	Up-regulated
PRDX2	Pig	2.87038e-47	1.60144	106	28	1.04898e-42	Up-regulated
YWHAH	Pig	3.07957e-47	1.23546	125	39	1.12543e-42	Up-regulated
THNSL1	Pig	3.38729e-47	2.13448	75	13	1.23789e-42	Up-regulated
ENSSSCG00000037595	Pig	3.6621e-47	1.81351	92	21	1.33832e-42	Up-regulated
GOLM1	Pig	4.63729e-47	1.32003	114	32	1.6947e-42	Up-regulated
PGM3	Pig	4.87924e-47	2.29336	0.08	15	1.78312e-42	Up-regulated
MEIOB	Pig	5.57397e-47	1.15222	209	96	2.03701e-42	Up-regulated
RPL6	Pig	5.59165e-47	1.34735	128	41	2.04347e-42	Up-regulated
PTBP3	Pig	5.98296e-47	1.06998	204	92	2.18647e-42	Up-regulated
RNF7	Pig	6.04034e-47	0.905418	0.17	67	2.20744e-42	Up-regulated
CGRRF1	Pig	7.30029e-47	1.60732	106	29	2.66789e-42	Up-regulated
ZCWPW2	Pig	7.3282e-47	0.910872	221	102	2.67809e-42	Up-regulated
RASD2	Pig	7.91152e-47	3.73805	56	4	2.89126e-42	Up-regulated
LRRC41	Pig	7.94268e-47	0.769113	0.27	135	2.90265e-42	Up-regulated
WWC2	Pig	8.73677e-47	0.595332	419	252	3.19285e-42	Up-regulated
PAN3	Pig	8.76064e-47	0.621155	451	284	3.20158e-42	Up-regulated
CCDC82	Pig	8.86402e-47	2.61388	69	0.01	3.23936e-42	Up-regulated
ENSSSCG00000015293	Pig	9.99195e-47	1.8692	81	16	3.65156e-42	Up-regulated
B3GALNT2	Pig	1.05205e-46	0.6867	267	133	3.84471e-42	Up-regulated
KCNA4	Pig	1.05507e-46	2.0527	67	9	3.85576e-42	Up-regulated
ENSSSCG00000010954	Pig	1.05731e-46	0.625259	292	152	3.86394e-42	Up-regulated
ACP6	Pig	1.0598e-46	2.38716	73	12	3.87305e-42	Up-regulated
GTF2IRD1	Pig	1.06995e-46	0.997833	191	81	3.91013e-42	Up-regulated
PEX14	Pig	1.07589e-46	0.559808	324	174	3.93183e-42	Up-regulated
MIS12	Pig	1.1002e-46	2.40395	75	13	4.02067e-42	Up-regulated
ENOX2	Pig	1.1008e-46	1.07221	158	0.06	4.02286e-42	Up-regulated
PRKAR1A	Pig	1.14074e-46	0.544115	0.36	204	4.16884e-42	Up-regulated
ATP5PB	Pig	1.31992e-46	0.585047	262	129	4.82365e-42	Up-regulated
INTS13	Pig	1.32338e-46	0.813001	155	57	4.83628e-42	Up-regulated
ENSSSCG00000014094	Pig	1.32508e-46	0.727265	259	127	4.8425e-42	Up-regulated
TRUB1	Pig	1.32726e-46	0.741957	0.2	87	4.85046e-42	Up-regulated
ENSSSCG00000032877	Pig	1.33701e-46	1.03249	153	56	4.8861e-42	Up-regulated
ENSSSCG00000016263	Pig	1.38239e-46	9.05563	44	0	5.05195e-42	Up-regulated
CST3	Pig	1.42886e-46	3.99454	48	1	5.22177e-42	Up-regulated
SPIDR	Pig	1.53407e-46	1.71375	0.12	38	5.60626e-42	Up-regulated
ERCC4	Pig	1.57035e-46	1.81318	86	18	5.73885e-42	Up-regulated
GTPBP2	Pig	1.65043e-46	1.02596	165	64	6.0315e-42	Up-regulated
TGFB1I1	Pig	1.66275e-46	2.95261	62	7	6.07652e-42	Up-regulated
ENSSSCG00000016791	Pig	1.74838e-46	2.88598	67	9	6.38944e-42	Up-regulated
TLE3	Pig	1.79563e-46	6.21107	45	0	6.56214e-42	Up-regulated
ERAP1	Pig	1.86332e-46	1.84457	87	19	6.80949e-42	Up-regulated
POLR1F	Pig	2.10245e-46	0.967463	202	89	7.68341e-42	Up-regulated
CCDC127	Pig	2.12767e-46	1.03093	129	42	7.77555e-42	Up-regulated
ENSSSCG00000039612	Pig	2.14148e-46	1.65843	88	19	7.82605e-42	Up-regulated
POFUT1	Pig	2.35324e-46	1.67777	108	0.03	8.59992e-42	Up-regulated
MYORG	Pig	2.59462e-46	0.710077	276	0.14	9.48203e-42	Up-regulated
PFDN1	Pig	2.71096e-46	0.539203	324	175	9.90721e-42	Up-regulated
ENSSSCG00000006510	Pig	2.94992e-46	0.707	233	109	1.07805e-41	Up-regulated
RPL15	Pig	3.0233e-46	1.83686	96	23	1.10486e-41	Up-regulated
TPCN1	Pig	3.1251e-46	2.53427	75	13	1.14207e-41	Up-regulated
OSBPL8	Pig	3.22724e-46	0.529102	412	246	1.17939e-41	Up-regulated
TRIM35	Pig	3.34147e-46	1.64145	93	22	1.22114e-41	Up-regulated
ENSSSCG00000009146	Pig	3.3874e-46	1.65182	127	42	1.23793e-41	Up-regulated
MSL1	Pig	4.54207e-46	1.36754	0.12	37	1.6599e-41	Up-regulated
RUFY2	Pig	4.56723e-46	0.712959	318	174	1.66909e-41	Up-regulated
ORC5	Pig	5.21253e-46	0.801151	204	0.09	1.90492e-41	Up-regulated
ENSSSCG00000023546	Pig	5.59358e-46	3.14525	54	4	2.04417e-41	Up-regulated
ARSK	Pig	6.16871e-46	1.90655	76	13	2.25436e-41	Up-regulated
NDUFC2	Pig	6.23246e-46	1.47368	114	34	2.27765e-41	Up-regulated
EIF4EBP2	Pig	6.23249e-46	1.26184	158	61	2.27766e-41	Up-regulated
NDFIP1	Pig	6.35308e-46	0.778924	347	0.2	2.32173e-41	Up-regulated
METTL14	Pig	6.59402e-46	0.797935	0.21	94	2.40979e-41	Up-regulated
FNDC3A	Pig	6.68149e-46	0.538206	494	317	2.44175e-41	Up-regulated
APOO	Pig	7.40192e-46	0.830623	144	51	2.70503e-41	Up-regulated
RACK1	Pig	7.88818e-46	1.5864	104	28	2.88273e-41	Up-regulated
BTF3	Pig	8.18206e-46	1.04368	153	57	2.99014e-41	Up-regulated
PHEX	Pig	8.25092e-46	0.626355	284	149	3.0153e-41	Up-regulated
LRP2BP	Pig	9.01598e-46	0.71664	308	166	3.29489e-41	Up-regulated
HTR2B	Pig	9.97221e-46	2.21878	75	13	3.64434e-41	Up-regulated
CTNNBL1	Pig	1.00008e-45	0.53407	364	207	3.6548e-41	Up-regulated
SLC9A8	Pig	1.08802e-45	0.581554	494	0.31	3.97616e-41	Up-regulated
ENSSSCG00000026414	Pig	1.09337e-45	2.66541	67	9	3.99572e-41	Up-regulated
CHCHD6	Pig	1.11812e-45	1.04915	163	63	4.08616e-41	Up-regulated
HELQ	Pig	1.131e-45	1.4982	108	0.03	4.13324e-41	Up-regulated
C1orf198	Pig	1.22532e-45	0.559187	265	133	4.47795e-41	Up-regulated
EPG5	Pig	1.25496e-45	0.700467	268	135	4.58624e-41	Up-regulated
CUL3	Pig	1.31435e-45	0.58147	416	252	4.8033e-41	Up-regulated
GOLPH3	Pig	1.35888e-45	0.883447	0.22	103	4.96603e-41	Up-regulated
ENSSSCG00000046747	Pig	1.41485e-45	3.57261	58	5	5.17058e-41	Up-regulated
XKR9	Pig	1.45115e-45	3.85439	0.05	2	5.30324e-41	Up-regulated
THUMPD3	Pig	1.62049e-45	1.02043	178	74	5.92208e-41	Up-regulated
ENSSSCG00000011851	Pig	1.7137e-45	1.92329	89	21	6.26272e-41	Up-regulated
DCAF17	Pig	1.76709e-45	1.26309	136	47	6.45782e-41	Up-regulated
SATB2	Pig	1.91015e-45	4.83991	49	2	6.98065e-41	Up-regulated
COPS2	Pig	1.94656e-45	0.614042	278	141	7.11372e-41	Up-regulated
PARN	Pig	2.11589e-45	0.926193	236	116	7.73251e-41	Up-regulated
TOB1	Human	2.368e-45	0.911603	183	77	8.65384e-41	Up-regulated
HPS3	Pig	2.65426e-45	4.06462	51	3	9.69998e-41	Up-regulated
UROS	Pig	2.76306e-45	0.930207	176	72	1.00976e-40	Up-regulated
ENSSSCG00000027270	Pig	3.03289e-45	0.700502	243	118	1.10837e-40	Up-regulated
FADS3	Pig	3.03318e-45	1.12174	149	55	1.10848e-40	Up-regulated
EFR3A	Pig	3.49657e-45	0.523697	343	0.19	1.27782e-40	Up-regulated
ENSSSCG00000040763	Pig	3.51964e-45	2.51016	71	12	1.28625e-40	Up-regulated
MAP3K21	Pig	3.87561e-45	1.9834	85	18	1.41634e-40	Up-regulated
TIA1	Pig	3.89435e-45	0.503577	508	321	1.42319e-40	Up-regulated
KPNA7	Pig	3.92474e-45	1.30237	0.12	38	1.4343e-40	Up-regulated
TTC12	Pig	4.00962e-45	2.90751	55	5	1.46531e-40	Up-regulated
UTP20	Pig	4.08297e-45	0.859819	225	105	1.49212e-40	Up-regulated
ENSSSCG00000002935	Pig	4.32552e-45	1.81816	102	28	1.58076e-40	Up-regulated
CENPP	Pig	4.53839e-45	0.857825	293	159	1.65856e-40	Up-regulated
TMEM50B	Pig	4.827e-45	0.957301	205	93	1.76403e-40	Up-regulated
ATF1	Pig	5.01527e-45	0.78405	221	102	1.83283e-40	Up-regulated
TMEM67	Pig	5.35974e-45	1.8616	79	16	1.95872e-40	Up-regulated
POMT2	Pig	5.72946e-45	1.74696	102	28	2.09383e-40	Up-regulated
ASAH1	Pig	5.89068e-45	2.44088	71	12	2.15275e-40	Up-regulated
NDUFS5	Pig	6.23658e-45	1.84908	0.1	27	2.27916e-40	Up-regulated
RBL1	Pig	7.29115e-45	0.903128	157	61	2.66455e-40	Up-regulated
20,00 CYP	Pig	7.65369e-45	1.90904	86	19	2.79704e-40	Up-regulated
CPT2	Pig	7.87893e-45	2.45277	0.07	11	2.87935e-40	Up-regulated
MXD1	Pig	9.35869e-45	1.41128	127	42	3.42014e-40	Up-regulated
ZNF395	Pig	9.72715e-45	0.786919	312	173	3.55479e-40	Up-regulated
ENSSSCG00000014909	Pig	9.80709e-45	5.38093	49	2	3.584e-40	Up-regulated
STX7	Pig	1.01039e-44	0.710835	284	149	3.69248e-40	Up-regulated
MYO7B	Pig	1.01318e-44	3.22403	59	6	3.70267e-40	Up-regulated
DNASE1	Pig	1.10735e-44	1.09566	154	59	4.04683e-40	Up-regulated
UGGT1	Pig	1.15204e-44	0.585905	334	185	4.21014e-40	Up-regulated
ENSSSCG00000013052	Pig	1.18862e-44	0.562344	395	233	4.34381e-40	Up-regulated
PPP1R42	Pig	1.32023e-44	5.03206	46	1	4.82478e-40	Up-regulated
ENSSSCG00000003077	Pig	1.3382e-44	1.47772	97	25	4.89044e-40	Up-regulated
APPL1	Pig	1.38083e-44	0.652159	277	143	5.04624e-40	Up-regulated
RPAP3	Pig	1.47324e-44	0.697178	0.27	138	5.38397e-40	Up-regulated
OSGIN1	Pig	1.60093e-44	1.9588	72	12	5.85061e-40	Up-regulated
RNFT1	Pig	1.65623e-44	1.03227	134	46	6.05271e-40	Up-regulated
RASGEF1C	Pig	1.92263e-44	3.84293	57	5	7.02624e-40	Up-regulated
CYLD	Pig	2.01018e-44	0.676835	284	149	7.34619e-40	Up-regulated
ALG8	Pig	2.0777e-44	2.01598	84	18	7.59297e-40	Up-regulated
WASL	Pig	2.21562e-44	0.546885	0.39	229	8.09698e-40	Up-regulated
RBFOX3	Pig	2.30895e-44	4.1077	52	4	8.43806e-40	Up-regulated
SEPSECS	Pig	2.43511e-44	1.50843	111	33	8.89913e-40	Up-regulated
CTDSPL	Pig	2.52112e-44	0.641247	446	281	9.21344e-40	Up-regulated
GPR63	Pig	2.84561e-44	4.647	48	2	1.03993e-39	Up-regulated
ANKRD42	Pig	3.12419e-44	0.98926	174	72	1.14173e-39	Up-regulated
AMMECR1	Pig	3.16775e-44	0.575334	301	0.16	1.15765e-39	Up-regulated
STC2	Pig	3.18229e-44	0.521167	496	324	1.16297e-39	Up-regulated
FZD3	Pig	3.20678e-44	2.49697	69	11	1.17192e-39	Up-regulated
SGMS2	Pig	3.51944e-44	6.01529	44	1	1.28618e-39	Up-regulated
FRMD3	Pig	3.64453e-44	3.73865	51	4	1.33189e-39	Up-regulated
PRSS45P	Pig	3.98742e-44	4.88608	44	1	1.4572e-39	Up-regulated
DLAT	Pig	4.02637e-44	0.522178	256	127	1.47144e-39	Up-regulated
ENSSSCG00000046579	Pig	4.17922e-44	0.88589	0.2	0.09	1.52729e-39	Up-regulated
ZFP30	Pig	4.2309e-44	2.15521	83	18	1.54618e-39	Up-regulated
IFNGR2	Pig	4.76209e-44	2.34564	82	18	1.74031e-39	Up-regulated
ENSSSCG00000035142	Pig	4.76329e-44	1.37152	0.11	33	1.74074e-39	Up-regulated
METTL25	Pig	5.38562e-44	0.669382	311	171	1.96818e-39	Up-regulated
MARK3	Pig	5.65433e-44	0.536227	549	366	2.06637e-39	Up-regulated
LEMD3	Pig	5.90108e-44	0.724413	224	107	2.15655e-39	Up-regulated
SMYD2	Pig	6.05264e-44	0.773099	208	95	2.21194e-39	Up-regulated
ENSSSCG00000032916	Pig	6.30929e-44	0.742369	261	132	2.30573e-39	Up-regulated
ACOX1	Pig	6.3288e-44	0.905358	191	84	2.31286e-39	Up-regulated
RIN3	Pig	6.4935e-44	0.831603	229	0.11	2.37305e-39	Up-regulated
SPAG1	Pig	6.87411e-44	2.41312	75	14	2.51214e-39	Up-regulated
EFEMP1	Pig	7.18406e-44	3.65177	54	5	2.62541e-39	Up-regulated
SLC39A6	Pig	8.4446e-44	1.05907	154	0.06	3.08608e-39	Up-regulated
METTL4	Pig	8.70371e-44	1.28255	141	52	3.18077e-39	Up-regulated
TBC1D2B	Pig	9.89492e-44	2.66344	69	12	3.6161e-39	Up-regulated
MTERF3	Pig	1.00181e-43	0.675577	0.28	147	3.66113e-39	Up-regulated
WDR75	Pig	1.01325e-43	0.780815	194	85	3.70292e-39	Up-regulated
ZBTB41	Pig	1.05391e-43	1.01372	168	69	3.85151e-39	Up-regulated
CEP162	Pig	1.18261e-43	1.00268	161	64	4.32186e-39	Up-regulated
PRCP	Pig	1.27913e-43	1.71663	106	31	4.67456e-39	Up-regulated
PRDX6	Pig	1.55333e-43	2.76746	69	12	5.67665e-39	Up-regulated
METTL24	Pig	1.59335e-43	0.856859	0.16	64	5.8229e-39	Up-regulated
SMPD1	Pig	1.63598e-43	2.66211	62	8	5.9787e-39	Up-regulated
KLHL9	Pig	1.94748e-43	2.51728	65	9	7.11708e-39	Up-regulated
TRIM26	Pig	2.03457e-43	2.90051	67	11	7.43534e-39	Up-regulated
GLI2	Pig	2.08854e-43	3.43817	59	7	7.63256e-39	Up-regulated
UBXN8	Pig	2.24125e-43	1.74786	85	0.02	8.19063e-39	Up-regulated
CKM	Pig	2.31154e-43	0.66458	0.44	285	8.44752e-39	Up-regulated
TMEM267	Pig	2.4226e-43	0.924492	145	54	8.85339e-39	Up-regulated
CMSS1	Pig	2.9189e-43	0.525789	496	326	1.06671e-38	Up-regulated
ZBTB43	Pig	2.94435e-43	0.745981	205	94	1.07601e-38	Up-regulated
SAP30	Pig	3.16242e-43	1.53465	94	24	1.15571e-38	Up-regulated
WDR36	Pig	3.17071e-43	1.21086	135	48	1.15873e-38	Up-regulated
ENSSSCG00000034976	Pig	3.30777e-43	1.45135	98	26	1.20882e-38	Up-regulated
EOGT	Pig	3.80486e-43	1.37594	114	36	1.39049e-38	Up-regulated
RELL1	Pig	3.88586e-43	3.10469	56	6	1.42009e-38	Up-regulated
SLC23A2	Pig	4.05261e-43	0.980838	215	104	1.48102e-38	Up-regulated
ERCC6	Pig	4.19465e-43	0.665752	177	75	1.53294e-38	Up-regulated
MTHFD1L	Pig	4.26272e-43	4.51767	48	2	1.55781e-38	Up-regulated
PARP14	Pig	4.89562e-43	5.69069	43	1	1.78911e-38	Up-regulated
ACTR1B	Pig	5.15028e-43	1.28545	123	41	1.88217e-38	Up-regulated
SHISA4	Pig	6.6699e-43	3.54525	52	4	2.43751e-38	Up-regulated
FUCA1	Pig	7.43164e-43	1.82553	88	21	2.71589e-38	Up-regulated
AGPAT5	Pig	7.49525e-43	0.911285	191	85	2.73914e-38	Up-regulated
NOA1	Pig	7.91675e-43	1.35013	143	54	2.89318e-38	Up-regulated
CREBZF	Pig	8.43546e-43	0.586332	321	177	3.08274e-38	Up-regulated
STK4	Pig	8.55482e-43	1.9686	82	18	3.12636e-38	Up-regulated
POLI	Pig	8.63128e-43	1.08425	128	44	3.1543e-38	Up-regulated
VPS37C	Pig	8.70155e-43	1.61855	102	29	3.17998e-38	Up-regulated
TET3	Pig	8.95528e-43	1.44297	0.12	0.04	3.27271e-38	Up-regulated
BTBD7	Pig	9.1329e-43	0.589738	0.3	161	3.33762e-38	Up-regulated
HSD11B1	Pig	9.16134e-43	3.78889	52	4	3.34801e-38	Up-regulated
LIMK1	Pig	9.67651e-43	2.58023	63	9	3.53628e-38	Up-regulated
RPL23	Pig	9.75127e-43	1.3677	138	51	3.5636e-38	Up-regulated
CEP97	Pig	1.29158e-42	1.50594	106	31	4.72008e-38	Up-regulated
SPARCL1	Pig	1.29433e-42	2.99314	52	4	4.73011e-38	Up-regulated
AFTPH	Pig	1.2969e-42	0.78232	237	117	4.73954e-38	Up-regulated
CCDC150	Pig	1.32295e-42	1.65037	99	28	4.83473e-38	Up-regulated
SS18L2	Pig	1.96465e-42	1.3328	102	29	7.17983e-38	Up-regulated
GABPA	Pig	2.3192e-42	0.90916	188	83	8.47551e-38	Up-regulated
STK26	Pig	2.44232e-42	2.07773	0.08	18	8.92545e-38	Up-regulated
CCDC191	Pig	2.50488e-42	0.502477	244	0.12	9.1541e-38	Up-regulated
[truncated: 3,595 more rows]

## Sheet: Vasc_EC
gene	Species	p_val	avg_log2FC	pct. 1	pct.2	p_val_adj	level
KIT	Pig	8.9065e-72	3.07192	918	228	3.25488e-67	Up-regulated
SORBS2	Pig	1.18103e-57	3.61726	783	142	4.31606e-53	Up-regulated
CALCRL	Pig	1.90482e-56	2.80157	856	274	6.96117e-52	Up-regulated
ENSSSCG00000022925	Pig	1.28587e-54	6.12726	683	36	4.69923e-50	Up-regulated
TANC1	Pig	7.88153e-53	2.42731	0.85	299	2.88031e-48	Up-regulated
NFIB	Pig	6.39976e-52	2.20146	889	411	2.33879e-47	Up-regulated
MYO1E	Pig	1.77154e-50	2.37792	899	477	6.47408e-46	Up-regulated
WWTR1	Pig	4.23261e-47	2.94669	758	208	1.54681e-42	Up-regulated
ENSSSCG00000029160	Pig	3.69963e-43	7.70099	573	5	1.35203e-38	Up-regulated
RAI14	Pig	2.14143e-40	2.24333	719	152	7.82587e-36	Up-regulated
ARHGEF28	Pig	1.14054e-39	2.9821	706	183	4.16811e-35	Up-regulated
PPP3CA	Pig	1.22969e-38	1.46796	894	467	4.49391e-34	Up-regulated
PCDH17	Pig	3.22612e-36	2.0343	766	244	1.17898e-31	Up-regulated
DOCK4	Pig	2.67112e-35	1.48794	899	528	9.76161e-31	Up-regulated
PDGFD	Pig	2.82007e-35	2.25532	771	294	1.0306e-30	Up-regulated
LPP	Pig	9.24673e-35	1.64245	878	523	3.37922e-30	Up-regulated
FAM126A	Pig	5.29749e-34	2.32205	722	244	1.93597e-29	Up-regulated
SVIL	Pig	1.25902e-33	1.59328	852	442	4.60108e-29	Up-regulated
C1orf21	Pig	2.4346e-33	1.90257	757	305	8.89723e-29	Up-regulated
FLNB	Pig	4.33716e-33	2.59121	635	137	1.58502e-28	Up-regulated
FNDC3B	Pig	5.17304e-32	1.30722	874	482	1.89049e-27	Up-regulated
BMPR2	Pig	2.02e-30	1.66156	0.82	411	7.38208e-26	Up-regulated
ENSSSCG00000010172	Pig	9.64739e-30	2.39694	661	188	3.52564e-25	Up-regulated
ZFYVE9	Pig	2.08966e-29	2.59637	577	117	7.63668e-25	Up-regulated
DACH1	Pig	2.25287e-29	1.98944	0.73	0.31	8.2331e-25	Up-regulated
TJP1	Pig	4.37832e-29	1.77078	718	274	1.60006e-24	Up-regulated
PLVAP	Pig	5.6043e-29	2.92101	524	76	2.04809e-24	Up-regulated
ACTN4	Pig	6.93158e-29	1.93006	704	234	2.53315e-24	Up-regulated
SERPINE1	Pig	2.86085e-28	5.74369	436	0.01	1.0455e-23	Up-regulated
PPFIBP1	Pig	7.1273e-28	1.398	827	447	2.60467e-23	Up-regulated
IVNS1ABP	Pig	7.84318e-28	3.4318	524	96	2.86629e-23	Up-regulated
EMP1	Pig	1.90229e-27	2.41395	584	137	6.95191e-23	Up-regulated
RAPGEF2	Pig	3.53334e-27	1.25925	861	528	1.29126e-22	Up-regulated
CTNNA1	Pig	3.74592e-27	1.53328	0.76	0.36	1.36895e-22	Up-regulated
ARHGAP29	Pig	7.76004e-27	1.32901	0.83	421	2.83591e-22	Up-regulated
CLIC4	Pig	1.48854e-26	1.63351	726	0.31	5.43986e-22	Up-regulated
ADGRL2	Pig	1.92307e-26	1.62586	764	0.35	7.02784e-22	Up-regulated
GJA1	Pig	5.05819e-26	9.10619	395	0	1.84852e-21	Up-regulated
MBNL1	Pig	6.85557e-26	1.36588	792	411	2.50537e-21	Up-regulated
OSBPL10	Pig	7.54935e-26	3.19775	504	86	2.75891e-21	Up-regulated
VIM	Pig	1.07442e-25	2.79075	535	117	3.92646e-21	Up-regulated
CTNND1	Pig	1.68425e-25	1.27573	764	0.32	6.15509e-21	Up-regulated
NFKBIZ	Pig	1.95192e-25	2.96884	0.51	96	7.13328e-21	Up-regulated
ENSSSCG00000005247	Pig	2.29853e-25	2.6232	524	96	8.39996e-21	Up-regulated
DCAF6	Pig	8.81849e-25	2.1706	596	188	3.22272e-20	Up-regulated
TCF4	Pig	1.42939e-24	0.918763	977	868	5.22369e-20	Up-regulated
PELI2	Pig	1.86989e-24	1.01627	749	0.33	6.83351e-20	Up-regulated
MGAT4A	Pig	2.50271e-24	1.41196	0.63	188	9.14616e-20	Up-regulated
ACTG1	Pig	2.94883e-24	2.8381	498	96	1.07765e-19	Up-regulated
ENSSSCG00000011729	Pig	4.10612e-24	2.01124	627	208	1.50058e-19	Up-regulated
PALMD	Pig	9.10588e-24	2.28206	527	112	3.32774e-19	Up-regulated
ADAMTS6	Pig	1.04625e-23	4.94924	417	46	3.82353e-19	Up-regulated
UBB	Pig	1.81282e-23	2.63888	509	112	6.62496e-19	Up-regulated
CDH13	Pig	3.13439e-23	1.22007	841	528	1.14546e-18	Up-regulated
ATP8B1	Pig	3.61768e-23	2.72673	494	112	1.32208e-18	Up-regulated
KDR	Pig	4.03031e-23	1.69275	565	137	1.47288e-18	Up-regulated
ENSSSCG00000033385	Pig	6.36815e-23	1.14924	704	244	2.32724e-18	Up-regulated
ANGPT2	Pig	6.9529e-23	4.34814	399	0.03	2.54094e-18	Up-regulated
EGLN3	Pig	8.37071e-23	7.95176	361	5	3.05908e-18	Up-regulated
CARMIL1	Pig	2.76666e-22	1.01192	768	0.35	1.01108e-17	Up-regulated
PAPSS1	Pig	2.77439e-22	2.70627	446	66	1.0139e-17	Up-regulated
ADGRL4	Pig	2.7927e-22	1.37974	755	386	1.02059e-17	Up-regulated
MBD2	Pig	6.28395e-22	1.92956	538	142	2.29647e-17	Up-regulated
CAST	Pig	6.94834e-22	2.12118	498	117	2.53927e-17	Up-regulated
SLC12A2	Pig	7.26823e-22	2.72811	486	107	2.65617e-17	Up-regulated
CD2AP	Pig	8.77032e-22	1.90752	534	142	3.20512e-17	Up-regulated
CRIM1	Pig	1.60616e-21	1.75195	724	376	5.86971e-17	Up-regulated
ACVR2A	Pig	2.48959e-21	2.32267	528	152	9.09821e-17	Up-regulated
ERC1	Pig	9.24745e-21	1.37043	683	305	3.37948e-16	Up-regulated
PCDHGA4	Pig	1.14355e-20	1.88196	604	218	4.17911e-16	Up-regulated
DGKH	Pig	1.2085e-20	0.938977	884	629	4.41645e-16	Up-regulated
MAGI1	Pig	1.57215e-20	0.745216	976	812	5.74541e-16	Up-regulated
DDIT4	Pig	1.92845e-20	2.09729	507	132	7.04753e-16	Up-regulated
PPP1R13B	Pig	2.05157e-20	1.60715	612	213	7.49745e-16	Up-regulated
MGAT5	Pig	4.02131e-20	1.14013	852	518	1.46959e-15	Up-regulated
HCN1	Pig	4.15934e-20	7.05411	333	0.01	1.52003e-15	Up-regulated
CHST1	Pig	7.63638e-20	2.93896	386	41	2.79072e-15	Up-regulated
MRTFB	Pig	9.466e-20	1.25904	795	503	3.45935e-15	Up-regulated
ICA1	Pig	9.81266e-20	1.92997	0.53	162	3.58604e-15	Up-regulated
HIVEP2	Pig	1.78475e-19	1.45389	669	305	6.52237e-15	Up-regulated
CORO1C	Pig	3.05496e-19	1.80877	544	162	1.11643e-14	Up-regulated
FGD6	Pig	3.70405e-19	2.41679	442	91	1.35364e-14	Up-regulated
ANXA5	Pig	3.94335e-19	1.49485	604	228	1.4411e-14	Up-regulated
KLF6	Pig	4.23773e-19	1.6467	531	147	1.54868e-14	Up-regulated
PHACTR2	Pig	4.68492e-19	0.958689	922	721	1.71211e-14	Up-regulated
TBL1XR1	Pig	5.04459e-19	1.8131	522	173	1.84354e-14	Up-regulated
LMO7	Pig	6.78141e-19	2.96996	407	76	2.47827e-14	Up-regulated
PTPRK	Pig	7.86973e-19	1.53234	658	345	2.87599e-14	Up-regulated
ENSSSCG00000014242	Pig	1.17119e-18	2.24648	0.41	76	4.2801e-14	Up-regulated
PRKD1	Pig	1.24922e-18	0.963921	821	492	4.56528e-14	Up-regulated
TEAD1	Pig	1.54542e-18	1.16513	692	345	5.64775e-14	Up-regulated
GSK3B	Pig	1.96721e-18	1.11206	0.76	421	7.18918e-14	Up-regulated
ECM1	Pig	1.99178e-18	8.4802	298	0	7.27896e-14	Up-regulated
PHLPP1	Pig	2.64399e-18	1.34204	625	244	9.66247e-14	Up-regulated
ITGAV	Pig	2.93278e-18	2.69159	415	86	1.07178e-13	Up-regulated
LYST	Pig	3.04556e-18	1.96741	486	132	1.113e-13	Up-regulated
LAMB1	Pig	3.10991e-18	1.3595	596	208	1.13652e-13	Up-regulated
APP	Pig	3.33981e-18	0.939657	877	624	1.22053e-13	Up-regulated
PPARG	Pig	3.38908e-18	1.68846	468	117	1.23854e-13	Up-regulated
RGMB	Pig	3.50192e-18	4.10633	355	46	1.27978e-13	Up-regulated
LAMA4	Pig	4.97645e-18	1.29273	674	335	1.81864e-13	Up-regulated
RAPGEF5	Pig	5.35268e-18	1.58348	659	325	1.95614e-13	Up-regulated
HIF1A	Pig	5.97389e-18	1.68668	0.55	203	2.18316e-13	Up-regulated
INPP5D	Pig	6.20329e-18	2.34484	0.38	51	2.26699e-13	Up-regulated
CAV2	Pig	8.67834e-18	2.85098	365	46	3.1715e-13	Up-regulated
ENSSSCG00000006231	Pig	1.21436e-17	1.27048	667	0.32	4.43787e-13	Up-regulated
MSRB3	Pig	1.31072e-17	2.02187	459	127	4.79002e-13	Up-regulated
DUSP1	Pig	1.35243e-17	2.25571	427	91	4.94245e-13	Up-regulated
PLCB1	Pig	1.46952e-17	1.31026	814	614	5.37038e-13	Up-regulated
FBXW7	Pig	1.54424e-17	1.56892	0.5	157	5.64342e-13	Up-regulated
ADAMTS9	Pig	1.8924e-17	1.15764	736	431	6.91577e-13	Up-regulated
CD109	Pig	1.91468e-17	2.71473	0.36	46	6.99718e-13	Up-regulated
PLS3	Pig	1.99622e-17	1.33701	702	365	7.29519e-13	Up-regulated
ENSSSCG00000012262	Pig	2.07642e-17	1.41042	631	305	7.58827e-13	Up-regulated
HSPB1	Pig	2.95594e-17	2.48646	363	46	1.08025e-12	Up-regulated
EMCN	Pig	3.18447e-17	1.00999	757	421	1.16377e-12	Up-regulated
S1PR1	Pig	4.04799e-17	1.00011	663	279	1.47934e-12	Up-regulated
NOX4	Pig	4.31734e-17	1.45511	636	294	1.57777e-12	Up-regulated
SMCHD1	Pig	4.33938e-17	1.10451	762	396	1.58583e-12	Up-regulated
ETS1	Pig	4.35418e-17	0.854656	805	426	1.59123e-12	Up-regulated
PSAP	Pig	6.19698e-17	1.51955	557	208	2.26469e-12	Up-regulated
PAM	Pig	7.3676e-17	1.12076	676	0.32	2.69249e-12	Up-regulated
NDRG1	Pig	7.53031e-17	2.53867	362	51	2.75195e-12	Up-regulated
ANO6	Pig	7.85151e-17	0.809485	807	416	2.86934e-12	Up-regulated
SLC38A2	Pig	8.04283e-17	1.86998	455	122	2.93925e-12	Up-regulated
SLC25A24	Pig	9.69728e-17	1.10693	475	132	3.54387e-12	Up-regulated
PTPN12	Pig	9.84519e-17	1.14917	679	0.32	3.59792e-12	Up-regulated
PIP4K2A	Pig	1.10736e-16	1.11274	637	274	4.04683e-12	Up-regulated
TCF12	Pig	1.11639e-16	0.763937	857	614	4.07984e-12	Up-regulated
MSN	Pig	1.47221e-16	1.18024	593	223	5.38021e-12	Up-regulated
EPHA4	Pig	1.52839e-16	2.66992	356	56	5.5855e-12	Up-regulated
RBFOX2	Pig	1.67722e-16	1.02185	0.7	345	6.12939e-12	Up-regulated
TMSB10	Pig	1.83881e-16	1.54684	596	254	6.71993e-12	Up-regulated
ENSSSCG00000004578	Pig	2.43608e-16	2.23208	0.41	91	8.90264e-12	Up-regulated
SMAD1	Pig	2.58698e-16	2.03615	445	112	9.45411e-12	Up-regulated
NCKAP1	Pig	2.62344e-16	1.36152	603	259	9.58735e-12	Up-regulated
MYORG	Pig	2.6242e-16	1.9058	454	127	9.59013e-12	Up-regulated
ENSSSCG00000012006	Pig	2.78208e-16	1.76704	429	107	1.01671e-11	Up-regulated
MPDZ	Pig	2.86101e-16	1.70684	477	152	1.04555e-11	Up-regulated
MALT1	Pig	2.88904e-16	2.42694	0.37	61	1.0558e-11	Up-regulated
DENND5B	Pig	3.28662e-16	2.03697	0.44	122	1.2011e-11	Up-regulated
IGFBP2	Pig	3.3192e-16	1.5172	329	36	1.213e-11	Up-regulated
KCNN2	Pig	3.46157e-16	2.61126	415	112	1.26503e-11	Up-regulated
TNKS	Pig	4.61408e-16	1.30309	542	198	1.68621e-11	Up-regulated
VMP1	Pig	5.58512e-16	1.48715	0.49	152	2.04108e-11	Up-regulated
SPARC	Pig	6.83432e-16	2.24879	425	117	2.4976e-11	Up-regulated
LRRFIP2	Pig	8.07643e-16	2.37059	372	76	2.95153e-11	Up-regulated
SLK	Pig	8.88742e-16	1.77505	453	132	3.24791e-11	Up-regulated
ACTB	Pig	1.0373e-15	1.38875	453	127	3.79081e-11	Up-regulated
RASA1	Pig	1.11299e-15	1.20976	0.53	178	4.06741e-11	Up-regulated
DCLK2	Pig	1.29248e-15	1.83217	419	96	4.72338e-11	Up-regulated
LUZP1	Pig	1.38128e-15	1.12642	681	0.34	5.04788e-11	Up-regulated
NAV2	Pig	1.48119e-15	1.92383	483	173	5.41301e-11	Up-regulated
ITGA6	Pig	1.48279e-15	0.75605	724	0.36	5.41885e-11	Up-regulated
SPRED1	Pig	1.54246e-15	1.17857	565	223	5.63692e-11	Up-regulated
MYO1D	Pig	1.61974e-15	1.13446	564	213	5.91935e-11	Up-regulated
FILIP1	Pig	2.03158e-15	1.27135	696	391	7.42441e-11	Up-regulated
TMEM135	Pig	2.05321e-15	1.1827	645	0.31	7.50345e-11	Up-regulated
ENSSSCG00000006395	Pig	2.3608e-15	2.46259	354	61	8.62755e-11	Up-regulated
EXOC4	Pig	2.36802e-15	0.754888	863	629	8.65394e-11	Up-regulated
RICTOR	Pig	2.55984e-15	1.33851	522	183	9.35495e-11	Up-regulated
SMURF2	Pig	2.65165e-15	1.1888	696	0.36	9.69047e-11	Up-regulated
UBE2K	Pig	3.02316e-15	1.51602	491	173	1.10481e-10	Up-regulated
CDC42BPA	Pig	3.15278e-15	0.796211	914	721	1.15218e-10	Up-regulated
TSPAN15	Pig	3.71578e-15	2.62436	308	0.03	1.35793e-10	Up-regulated
RYK	Pig	3.78919e-15	2.085	376	76	1.38476e-10	Up-regulated
ADGRF4	Pig	4.47487e-15	2.36599	305	0.03	1.63534e-10	Up-regulated
OSBPL3	Pig	4.8596e-15	4.94068	272	15	1.77594e-10	Up-regulated
MAP4	Pig	5.10102e-15	1.25935	559	234	1.86417e-10	Up-regulated
ST3GAL6	Pig	5.60493e-15	2.75212	323	46	2.04832e-10	Up-regulated
IL13RA1	Pig	6.60677e-15	2.72225	323	46	2.41444e-10	Up-regulated
CCSER1	Pig	6.86396e-15	0.917774	758	442	2.50844e-10	Up-regulated
BHLHE40	Pig	6.89047e-15	2.70352	324	46	2.51812e-10	Up-regulated
RGS2	Pig	7.75824e-15	4.64253	0.27	15	2.83525e-10	Up-regulated
IGFBP7	Pig	9.64302e-15	1.1415	662	335	3.52404e-10	Up-regulated
SOCS5	Pig	1.01384e-14	1.13557	625	274	3.70508e-10	Up-regulated
MLLT10	Pig	1.17822e-14	0.939078	721	411	4.3058e-10	Up-regulated
ARHGAP18	Pig	1.57127e-14	1.21548	485	157	5.7422e-10	Up-regulated
PICALM	Pig	1.78827e-14	0.747854	833	523	6.53525e-10	Up-regulated
SLMAP	Pig	1.95373e-14	1.44985	479	183	7.13989e-10	Up-regulated
ENSSSCG00000022128	Pig	2.08591e-14	2.16148	383	102	7.62294e-10	Up-regulated
ELF2	Pig	2.25568e-14	1.00012	665	335	8.2434e-10	Up-regulated
SYCP2	Pig	2.28719e-14	1.41998	416	107	8.35854e-10	Up-regulated
QKI	Pig	2.53012e-14	0.567135	877	645	9.24631e-10	Up-regulated
STRN	Pig	3.50503e-14	2.41618	317	51	1.28091e-09	Up-regulated
NEDD4L	Pig	4.70935e-14	1.6104	512	213	1.72103e-09	Up-regulated
PKM	Pig	4.76275e-14	2.51307	0.33	61	1.74055e-09	Up-regulated
EHBP1	Pig	5.14846e-14	0.959333	661	0.34	1.8815e-09	Up-regulated
FABP5	Pig	7.32783e-14	1.01144	689	0.36	2.67796e-09	Up-regulated
CCDC85A	Pig	7.56554e-14	0.931019	0.87	716	2.76483e-09	Up-regulated
ENO1	Pig	8.23465e-14	2.05024	353	76	3.00935e-09	Up-regulated
CCSER2	Pig	8.66252e-14	1.45029	474	183	3.16572e-09	Up-regulated
PPP2R2A	Pig	9.02816e-14	1.06347	0.62	284	3.29934e-09	Up-regulated
PARD3B	Pig	9.26378e-14	1.08002	613	299	3.38545e-09	Up-regulated
TSPAN12	Pig	9.42772e-14	3.68346	0.25	0.01	3.44536e-09	Up-regulated
CSNK1G3	Pig	9.64116e-14	1.37036	474	168	3.52336e-09	Up-regulated
CACUL1	Pig	1.05548e-13	2.26935	335	66	3.85725e-09	Up-regulated
PDLIM1	Pig	1.12195e-13	1.3231	478	168	4.10017e-09	Up-regulated
FILIP1L	Pig	1.24806e-13	1.8216	369	86	4.56105e-09	Up-regulated
GPR161	Pig	1.2835e-13	1.85004	396	107	4.69054e-09	Up-regulated
ERO1A	Pig	1.36317e-13	1.82245	429	132	4.9817e-09	Up-regulated
PRKN	Pig	1.43365e-13	1.81212	435	157	5.23929e-09	Up-regulated
LOXL2	Pig	1.46478e-13	2.92159	288	36	5.35303e-09	Up-regulated
OSMR	Pig	1.5672e-13	1.54831	304	46	5.72733e-09	Up-regulated
ENSSSCG00000035751	Pig	1.87628e-13	3.95369	264	25	6.85688e-09	Up-regulated
ITPR1	Pig	2.07798e-13	1.2845	535	218	7.59399e-09	Up-regulated
NHSL2	Pig	2.27351e-13	1.21477	522	208	8.30854e-09	Up-regulated
MINDY2	Pig	2.56043e-13	1.40223	455	162	9.35709e-09	Up-regulated
ADM	Pig	2.61648e-13	5.60886	238	0.01	9.56193e-09	Up-regulated
RNF220	Pig	2.72614e-13	1.50096	437	147	9.9627e-09	Up-regulated
ENSSSCG00000044700	Pig	3.01124e-13	0.77531	885	0.67	1.10046e-08	Up-regulated
CHIC2	Pig	3.23444e-13	1.29748	528	228	1.18203e-08	Up-regulated
ARNTL2	Pig	4.21267e-13	3.6377	254	0.02	1.53952e-08	Up-regulated
DYRK1A	Pig	4.33239e-13	1.05202	645	0.34	1.58327e-08	Up-regulated
DPYD	Pig	5.01669e-13	0.758543	807	508	1.83335e-08	Up-regulated
EPB41L4A	Pig	5.11453e-13	0.615075	826	533	1.86911e-08	Up-regulated
KIF13A	Pig	5.21222e-13	1.09665	605	305	1.9048e-08	Up-regulated
MTMR2	Pig	5.40227e-13	1.74407	363	91	1.97426e-08	Up-regulated
RSU1	Pig	5.71373e-13	1.08368	0.55	228	2.08808e-08	Up-regulated
TEX14	Pig	5.81414e-13	2.02723	273	0.03	2.12478e-08	Up-regulated
DEPP1	Pig	5.85212e-13	2.3587	0.3	51	2.13866e-08	Up-regulated
CTNNB1	Pig	7.07397e-13	1.28537	0.52	203	2.58518e-08	Up-regulated
PARP8	Pig	7.47072e-13	1.39415	455	168	2.73017e-08	Up-regulated
UHRF2	Pig	7.67407e-13	1.41465	443	147	2.80449e-08	Up-regulated
RNF149	Pig	7.96482e-13	1.33562	512	203	2.91074e-08	Up-regulated
YWHAZ	Pig	7.97815e-13	1.10516	535	234	2.91561e-08	Up-regulated
NIBAN2	Pig	8.08403e-13	2.29192	304	51	2.95431e-08	Up-regulated
MACROD2	Pig	8.45478e-13	0.962924	506	198	3.0898e-08	Up-regulated
USP25	Pig	8.70837e-13	0.888619	631	315	3.18248e-08	Up-regulated
PTPN4	Pig	8.7192e-13	2.04055	342	81	3.18643e-08	Up-regulated
FERMT1	Pig	9.43404e-13	1.25585	343	76	3.44767e-08	Up-regulated
STOM	Pig	9.43967e-13	1.57976	427	142	3.44973e-08	Up-regulated
TMEM131	Pig	9.63732e-13	1.10419	559	244	3.52196e-08	Up-regulated
KANSL1	Pig	1.31412e-12	0.983733	674	355	4.80244e-08	Up-regulated
F11R	Pig	1.4274e-12	1.33399	325	66	5.21642e-08	Up-regulated
PTBP3	Pig	1.44022e-12	0.730012	557	223	5.26328e-08	Up-regulated
ENAH	Pig	1.4406e-12	1.74865	412	142	5.26466e-08	Up-regulated
GJC1	Pig	2.11157e-12	2.01415	312	61	7.71672e-08	Up-regulated
NBEA	Pig	2.14028e-12	1.14429	0.61	0.32	7.82166e-08	Up-regulated
EXOC6B	Pig	2.25517e-12	0.612171	896	731	8.24152e-08	Up-regulated
PKIG	Pig	2.46449e-12	2.61992	315	71	9.00647e-08	Up-regulated
ARHGEF12	Pig	2.49268e-12	0.950808	673	371	9.10949e-08	Up-regulated
PHLDB2	Pig	2.89472e-12	1.27493	482	198	1.05787e-07	Up-regulated
RABGAP1	Pig	2.95827e-12	1.1992	493	198	1.0811e-07	Up-regulated
DLG1	Pig	3.05303e-12	1.24707	538	249	1.11573e-07	Up-regulated
NID2	Pig	3.40575e-12	1.11686	0.53	244	1.24463e-07	Up-regulated
ADAM9	Pig	3.4967e-12	1.04449	495	198	1.27787e-07	Up-regulated
GALNT1	Pig	3.82671e-12	0.755316	716	401	1.39847e-07	Up-regulated
PUM1	Pig	4.29643e-12	0.958579	635	325	1.57013e-07	Up-regulated
RC3H1	Pig	4.5731e-12	0.874662	586	264	1.67124e-07	Up-regulated
FBXW11	Pig	4.63893e-12	1.08025	552	249	1.6953e-07	Up-regulated
ZNF654	Pig	4.74562e-12	1.66547	0.4	137	1.73429e-07	Up-regulated
RBMS3	Pig	4.76648e-12	0.661807	918	761	1.74191e-07	Up-regulated
CREB3L2	Pig	4.96728e-12	0.932055	438	152	1.81529e-07	Up-regulated
ENSSSCG00000021656	Pig	5.0452e-12	1.15941	654	386	1.84377e-07	Up-regulated
SMYD3	Pig	5.86133e-12	0.824232	638	365	2.14202e-07	Up-regulated
ENPP1	Pig	6.34451e-12	1.76729	0.42	157	2.3186e-07	Up-regulated
CD93	Pig	6.93437e-12	0.809726	323	71	2.53416e-07	Up-regulated
MYO1B	Pig	7.04553e-12	1.08463	581	279	2.57479e-07	Up-regulated
ENSSSCG00000023788	Pig	7.06126e-12	2.42528	0.28	46	2.58054e-07	Up-regulated
ENSSSCG00000002260	Pig	7.71816e-12	1.10542	488	193	2.8206e-07	Up-regulated
ORC4	Pig	8.32824e-12	0.916043	494	188	3.04356e-07	Up-regulated
ZNF292	Pig	8.40801e-12	1.13099	511	213	3.07271e-07	Up-regulated
UBP1	Pig	8.63796e-12	1.38721	407	127	3.15674e-07	Up-regulated
NEDD9	Pig	9.16268e-12	0.994931	582	264	3.3485e-07	Up-regulated
MAP4K3	Pig	9.23837e-12	0.921844	749	467	3.37616e-07	Up-regulated
ASCC3	Pig	9.55244e-12	0.889565	605	305	3.49094e-07	Up-regulated
STT3B	Pig	9.66983e-12	1.23599	367	112	3.53384e-07	Up-regulated
ARHGAP21	Pig	9.79867e-12	1.27172	636	355	3.58092e-07	Up-regulated
GNB4	Pig	1.01659e-11	1.18507	312	66	3.71513e-07	Up-regulated
DDX3X	Pig	1.01974e-11	1.17285	508	208	3.72665e-07	Up-regulated
PPP4R2	Pig	1.06306e-11	1.22341	398	122	3.88495e-07	Up-regulated
RASSF3	Pig	1.1537e-11	0.782146	664	0.35	4.21621e-07	Up-regulated
KLHL2	Pig	1.31646e-11	0.793178	0.47	168	4.81102e-07	Up-regulated
FBXL20	Pig	1.56902e-11	1.11979	482	188	5.73398e-07	Up-regulated
RAP1GDS1	Pig	1.58971e-11	1.9876	291	56	5.8096e-07	Up-regulated
UBE2E2	Pig	1.94246e-11	0.754389	722	472	7.09873e-07	Up-regulated
ATP10D	Pig	2.12826e-11	1.49174	336	86	7.77773e-07	Up-regulated
MAP2K1	Pig	2.47857e-11	1.04734	413	132	9.05793e-07	Up-regulated
ADAM10	Pig	2.57934e-11	0.785562	766	467	9.42618e-07	Up-regulated
RASGRP3	Pig	2.74305e-11	0.734664	626	294	1.00245e-06	Up-regulated
ST8SIA4	Pig	2.88257e-11	0.737921	537	234	1.05343e-06	Up-regulated
TTC28	Pig	3.32902e-11	0.585112	883	655	1.21659e-06	Up-regulated
TGFBR2	Pig	3.35093e-11	0.889398	557	249	1.2246e-06	Up-regulated
TBC1D5	Pig	3.65831e-11	0.731457	687	371	1.33693e-06	Up-regulated
CLCN5	Pig	3.70348e-11	1.68709	315	76	1.35344e-06	Up-regulated
ARRDC4	Pig	3.8048e-11	2.33531	0.25	36	1.39047e-06	Up-regulated
SEC24D	Pig	4.02563e-11	1.65311	0.36	112	1.47117e-06	Up-regulated
ENSSSCG00000035904	Pig	4.13243e-11	0.919879	339	91	1.5102e-06	Up-regulated
CSNK1G1	Pig	4.15764e-11	1.29868	419	152	1.51941e-06	Up-regulated
TGFBR1	Pig	4.43916e-11	3.09835	233	25	1.62229e-06	Up-regulated
DYSF	Pig	4.93515e-11	1.02675	0.6	305	1.80355e-06	Up-regulated
MAP4K4	Pig	5.16589e-11	0.866308	0.7	406	1.88788e-06	Up-regulated
GRB10	Pig	5.51515e-11	0.910546	703	421	2.01551e-06	Up-regulated
KLHL5	Pig	5.6364e-11	1.30451	363	112	2.05982e-06	Up-regulated
STIM2	Pig	5.64958e-11	1.74992	353	112	2.06464e-06	Up-regulated
OLA1	Pig	6.04162e-11	2.35808	264	46	2.20791e-06	Up-regulated
WNK1	Pig	6.91468e-11	1.03094	577	299	2.52697e-06	Up-regulated
CLDN5	Pig	8.73434e-11	1.45259	308	76	3.19196e-06	Up-regulated
TANC2	Pig	1.05697e-10	1.50727	0.36	122	3.86269e-06	Up-regulated
THBS1	Pig	1.06187e-10	2.74932	279	61	3.88059e-06	Up-regulated
RCOR1	Pig	1.18098e-10	0.840363	465	183	4.31588e-06	Up-regulated
MAST4	Pig	1.32739e-10	0.646626	906	756	4.85093e-06	Up-regulated
MCPH1	Pig	1.39416e-10	2.32793	0.28	61	5.09494e-06	Up-regulated
TBC1D9	Pig	1.39666e-10	1.63872	375	132	5.10408e-06	Up-regulated
HSPH1	Pig	1.41474e-10	3.65104	215	0.02	5.17016e-06	Up-regulated
CHN1	Pig	1.47922e-10	4.20379	204	15	5.40581e-06	Up-regulated
FSTL1	Pig	1.48808e-10	2.22604	278	61	5.43819e-06	Up-regulated
PRKD3	Pig	1.55404e-10	0.614864	582	264	5.67924e-06	Up-regulated
FGF12	Pig	1.5871e-10	0.680063	725	447	5.80007e-06	Up-regulated
CALM1	Pig	1.59322e-10	1.04251	418	152	5.82241e-06	Up-regulated
GAPDH	Pig	1.59351e-10	1.14675	327	81	5.82348e-06	Up-regulated
RABGAP1L	Pig	1.5941e-10	0.741602	666	386	5.82564e-06	Up-regulated
RAB10	Pig	1.78498e-10	1.06659	427	157	6.52322e-06	Up-regulated
MCAM	Pig	1.82953e-10	3.40873	0.22	25	6.68602e-06	Up-regulated
OSBPL9	Pig	1.86749e-10	1.0536	442	178	6.82474e-06	Up-regulated
UNC5B	Pig	1.95473e-10	1.14419	321	86	7.14358e-06	Up-regulated
ENSSSCG00000007692	Pig	2.20916e-10	1.90132	265	51	8.07336e-06	Up-regulated
TLK1	Pig	2.28369e-10	1.19547	498	244	8.34576e-06	Up-regulated
ABI1	Pig	2.46282e-10	0.904863	0.47	188	9.00038e-06	Up-regulated
SIPA1L1	Pig	2.55486e-10	0.808916	565	274	9.33674e-06	Up-regulated
CCNYL1	Pig	2.57172e-10	2.01346	258	46	9.39836e-06	Up-regulated
PDE4B	Pig	2.63797e-10	1.78824	0.34	112	9.64047e-06	Up-regulated
DNAJB4	Pig	2.71292e-10	1.94306	272	61	9.91436e-06	Up-regulated
BNIP3	Pig	3.00043e-10	4.27494	204	0.02	1.09651e-05	Up-regulated
IFIT2	Pig	3.37523e-10	2.06405	287	71	1.23348e-05	Up-regulated
VTI1A	Pig	3.37698e-10	0.813808	628	0.33	1.23412e-05	Up-regulated
PLOD2	Pig	3.48931e-10	1.52625	338	107	1.27517e-05	Up-regulated
ENSSSCG00000002259	Pig	3.50572e-10	0.878205	591	0.31	1.28117e-05	Up-regulated
TMEM144	Pig	4.02366e-10	3.57874	213	25	1.47045e-05	Up-regulated
IGF2BP2	Pig	4.23691e-10	0.948951	482	218	1.54838e-05	Up-regulated
RNF125	Pig	4.27145e-10	1.14161	446	188	1.561e-05	Up-regulated
KITLG	Pig	4.35763e-10	0.624264	746	492	1.59249e-05	Up-regulated
RAD23B	Pig	4.4399e-10	1.53772	304	76	1.62256e-05	Up-regulated
KDM2A	Pig	4.47473e-10	0.891135	693	411	1.63529e-05	Up-regulated
TM4SF1	Pig	4.91818e-10	1.05693	377	127	1.79735e-05	Up-regulated
MPZL1	Pig	5.13461e-10	2.24138	268	61	1.87644e-05	Up-regulated
ZNF148	Pig	5.18278e-10	0.884065	506	223	1.89405e-05	Up-regulated
ENSSSCG00000013889	Pig	5.31086e-10	1.85004	289	71	1.94085e-05	Up-regulated
NEK7	Pig	5.39128e-10	0.797655	591	0.32	1.97024e-05	Up-regulated
DARS1	Pig	5.48162e-10	1.0646	0.37	122	2.00326e-05	Up-regulated
PRSS23	Pig	6.02616e-10	3.19348	196	15	2.20226e-05	Up-regulated
KDM4C	Pig	6.03916e-10	0.821636	0.56	274	2.20701e-05	Up-regulated
SMAD5	Pig	6.13706e-10	1.07207	413	152	2.24279e-05	Up-regulated
SHROOM4	Pig	6.19166e-10	0.570747	467	188	2.26274e-05	Up-regulated
R3HDM1	Pig	6.43022e-10	1.18911	407	157	2.34993e-05	Up-regulated
HSP90AA1	Pig	6.61736e-10	1.58	0.36	127	2.41831e-05	Up-regulated
CTIF	Pig	6.76151e-10	0.939628	461	193	2.47099e-05	Up-regulated
RNF217	Pig	7.07012e-10	1.58885	312	91	2.58377e-05	Up-regulated
TMOD3	Pig	7.39117e-10	0.568909	606	299	2.7011e-05	Up-regulated
ENSSSCG00000039071	Pig	8.00707e-10	1.87672	232	36	2.92618e-05	Up-regulated
MNAT1	Pig	8.01565e-10	1.18596	412	162	2.92932e-05	Up-regulated
REEP3	Pig	8.1169e-10	0.816747	521	249	2.96632e-05	Up-regulated
GNAQ	Pig	8.77585e-10	0.507795	801	548	3.20713e-05	Up-regulated
SERPINH1	Pig	8.98671e-10	2.30175	221	0.03	3.28419e-05	Up-regulated
ARHGAP31	Pig	9.19208e-10	0.520995	765	467	3.35924e-05	Up-regulated
ZFP36L2	Pig	9.31399e-10	1.17764	475	218	3.4038e-05	Up-regulated
RNGTT	Pig	9.77371e-10	1.07979	387	142	3.5718e-05	Up-regulated
SLC4A7	Pig	1.00349e-09	1.86617	288	76	3.66725e-05	Up-regulated
KCNB2	Pig	1.02651e-09	3.90043	205	25	3.75139e-05	Up-regulated
TMSB4X	Pig	1.14583e-09	1.04494	514	259	4.18745e-05	Up-regulated
XXYLT1	Pig	1.26178e-09	1.14685	303	81	4.61118e-05	Up-regulated
YAP1	Pig	1.3179e-09	1.56301	342	122	4.81627e-05	Up-regulated
XPC	Pig	1.32943e-09	3.72121	188	15	4.85839e-05	Up-regulated
ITGB1	Pig	1.33126e-09	0.682456	599	299	4.86509e-05	Up-regulated
WAC	Pig	1.37233e-09	0.871055	0.58	305	5.01519e-05	Up-regulated
FEZ2	Pig	1.44383e-09	1.83484	256	56	5.27646e-05	Up-regulated
CFL1	Pig	1.47764e-09	3.11149	0.19	15	5.40004e-05	Up-regulated
RSC1A1	Pig	1.57115e-09	1.7994	0.28	71	5.74176e-05	Up-regulated
SWAP70	Pig	1.8798e-09	0.752635	446	188	6.86974e-05	Up-regulated
PRKCA	Pig	1.95545e-09	1.59379	329	112	7.14621e-05	Up-regulated
STC2	Pig	2.04124e-09	3.02894	188	15	7.4597e-05	Up-regulated
TMEM45A	Pig	2.11018e-09	4.50032	169	5	7.71164e-05	Up-regulated
SETD7	Pig	2.12569e-09	1.87311	256	56	7.76834e-05	Up-regulated
SPAG9	Pig	2.14996e-09	0.747346	696	421	7.85703e-05	Up-regulated
ENSSSCG00000031912	Pig	2.18898e-09	2.46818	236	46	7.99963e-05	Up-regulated
EFL1	Pig	2.27478e-09	2.24972	256	61	8.31318e-05	Up-regulated
ENSSSCG00000014351	Pig	2.33153e-09	1.53817	179	0.01	8.52058e-05	Up-regulated
MYO5A	Pig	2.36084e-09	0.908277	411	157	8.6277e-05	Up-regulated
UTRN	Pig	2.36595e-09	0.527504	919	766	8.64637e-05	Up-regulated
ETV6	Pig	2.39584e-09	0.753576	751	528	8.7556e-05	Up-regulated
NCOA7	Pig	2.53235e-09	0.505471	627	0.34	9.25447e-05	Up-regulated
MACF1	Pig	2.53372e-09	0.560745	851	619	9.25949e-05	Up-regulated
ENSSSCG00000014267	Pig	2.72342e-09	0.939486	455	203	9.95273e-05	Up-regulated
HNRNPDL	Pig	2.83963e-09	0.616563	502	234	0.000103774	Up-regulated
ARHGEF26	Pig	2.99734e-09	1.11624	389	152	0.000109538	Up-regulated
UCK2	Pig	3.21927e-09	3.99816	174	0.01	0.000117648	Up-regulated
IQGAP1	Pig	3.25723e-09	0.595682	609	315	0.000119035	Up-regulated
ARPC2	Pig	3.38893e-09	0.606143	0.41	157	0.000123848	Up-regulated
JAK1	Pig	3.61135e-09	0.655199	661	386	0.000131977	Up-regulated
XPO1	Pig	3.72767e-09	1.17102	366	132	0.000136228	Up-regulated
PDK4	Pig	3.8036e-09	5.35486	163	5	0.000139003	Up-regulated
DRAM1	Pig	3.87713e-09	1.42004	287	76	0.00014169	Up-regulated
PEAK1	Pig	3.88426e-09	0.607675	827	635	0.00014195	Up-regulated
NLK	Pig	4.01586e-09	1.09345	404	173	0.00014676	Up-regulated
ARL8B	Pig	4.14493e-09	1.87158	278	81	0.000151476	Up-regulated
RLF	Pig	4.1582e-09	0.925005	468	218	0.000151962	Up-regulated
FBXL17	Pig	4.24941e-09	0.805337	558	294	0.000155295	Up-regulated
PKP4	Pig	4.34296e-09	0.874369	602	371	0.000158713	Up-regulated
ARFIP1	Pig	4.7592e-09	1.10203	364	132	0.000173925	Up-regulated
MBD5	Pig	4.98878e-09	0.633839	619	365	0.000182315	Up-regulated
RPL29	Pig	5.01637e-09	1.59605	263	66	0.000183323	Up-regulated
TRAPPC11	Pig	5.15304e-09	2.22004	208	0.03	0.000188318	Up-regulated
EGFLAM	Pig	5.23048e-09	0.693264	395	152	0.000191148	Up-regulated
ROCK1	Pig	5.41303e-09	0.601971	601	0.31	0.000197819	Up-regulated
ETV4	Pig	5.6466e-09	7.00033	151	0	0.000206355	Up-regulated
CAVIN3	Pig	5.65929e-09	1.70986	231	46	0.000206819	Up-regulated
RNF150	Pig	5.85741e-09	1.82304	293	91	0.000214059	Up-regulated
PRRG1	Pig	5.88726e-09	2.42591	196	25	0.00021515	Up-regulated
SLC25A36	Pig	6.10778e-09	1.04159	433	188	0.000223209	Up-regulated
DCBLD1	Pig	6.39903e-09	1.05099	277	71	0.000233853	Up-regulated
ENSSSCG00000016629	Pig	6.5234e-09	1.67709	301	102	0.000238398	Up-regulated
FAF1	Pig	6.54265e-09	0.608958	558	284	0.000239101	Up-regulated
ENSSSCG00000032591	Pig	6.81388e-09	1.11484	267	66	0.000249013	Up-regulated
PLAU	Pig	7.00309e-09	3.74516	169	0.01	0.000255928	Up-regulated
LPGAT1	Pig	7.09522e-09	1.26871	296	91	0.000259295	Up-regulated
ZNF366	Pig	7.11751e-09	0.833669	499	239	0.000260109	Up-regulated
RAPGEF4	Pig	7.18172e-09	0.89484	658	457	0.000262456	Up-regulated
ZSWIM6	Pig	7.89004e-09	0.749798	653	411	0.000288342	Up-regulated
MGMT	Pig	8.39323e-09	1.20826	335	122	0.00030673	Up-regulated
USP9X	Pig	8.8473e-09	0.790276	473	218	0.000323325	Up-regulated
AK4	Pig	9.50618e-09	0.802583	339	117	0.000347403	Up-regulated
SH3RF1	Pig	9.68891e-09	0.911677	346	122	0.000354081	Up-regulated
USP53	Pig	1.02191e-08	2.12817	289	96	0.000373456	Up-regulated
SUCLG2	Pig	1.04166e-08	1.16165	0.43	203	0.000380675	Up-regulated
ZCCHC7	Pig	1.04427e-08	0.683109	586	0.31	0.000381627	Up-regulated
ELOVL5	Pig	1.06416e-08	1.1053	319	107	0.000388898	Up-regulated
PHACTR1	Pig	1.08608e-08	0.932004	614	376	0.000396907	Up-regulated
SIK3	Pig	1.10211e-08	0.842656	512	269	0.000402765	Up-regulated
PIK3CA	Pig	1.10843e-08	0.966293	0.37	142	0.000405077	Up-regulated
ARHGEF2	Pig	1.15448e-08	1.11693	257	66	0.000421905	Up-regulated
PHC3	Pig	1.18355e-08	0.902482	488	239	0.000432528	Up-regulated
PDK1	Pig	1.21647e-08	3.41871	186	25	0.000444558	Up-regulated
UBAP2	Pig	1.24374e-08	0.959166	462	213	0.000454526	Up-regulated
HBB	Human	1.44398e-08	8.53422	144	0	0.000527701	Up-regulated
ARFGEF1	Pig	1.47979e-08	0.713191	556	294	0.000540789	Up-regulated
MDFIC	Pig	1.52476e-08	1.04841	278	76	0.000557224	Up-regulated
KCTD16	Pig	1.53967e-08	1.89517	286	96	0.000562673	Up-regulated
ATP11C	Pig	1.58502e-08	1.18888	353	132	0.000579247	Up-regulated
ACKR3	Pig	1.65231e-08	1.58005	288	91	0.000603836	Up-regulated
GLG1	Pig	1.65326e-08	0.724504	0.51	249	0.000604185	Up-regulated
ENSSSCG00000007188	Pig	1.73878e-08	1.13009	407	178	0.000635439	Up-regulated
GOLM2	Pig	1.78393e-08	0.967958	367	137	0.000651937	Up-regulated
NPSR1	Pig	1.79868e-08	1.05163	322	112	0.000657328	Up-regulated
ENSSSCG00000013052	Pig	1.83466e-08	0.967609	315	102	0.000670475	Up-regulated
ENSSSCG00000015083	Pig	1.85845e-08	1.4145	254	66	0.000679172	Up-regulated
TEAD4	Pig	2.02216e-08	1.40998	271	76	0.000738997	Up-regulated
TIMP1	Pig	2.02875e-08	5.79366	149	5	0.000741406	Up-regulated
CTTNBP2NL	Pig	2.04393e-08	0.586211	422	188	0.000746955	Up-regulated
SLC10A7	Pig	2.12261e-08	1.0423	329	112	0.000775709	Up-regulated
PLEKHA1	Pig	2.13291e-08	0.96495	513	254	0.000779472	Up-regulated
UNC13B	Pig	2.14242e-08	1.11898	405	183	0.000782948	Up-regulated
HBP1	Pig	2.15508e-08	1.07135	0.33	112	0.000787576	Up-regulated
ATF7IP	Pig	2.1559e-08	0.89381	371	142	0.000787873	Up-regulated
CBX5	Pig	2.1631e-08	3.9815	0.16	0.01	0.000790506	Up-regulated
FAM167B	Pig	2.24812e-08	0.890962	259	71	0.000821575	Up-regulated
ANKRD17	Pig	2.39343e-08	0.57879	569	315	0.000874679	Up-regulated
PSME4	Pig	2.39769e-08	1.11869	375	157	0.000876235	Up-regulated
FSCN1	Pig	2.46525e-08	3.09242	177	0.02	0.000900925	Up-regulated
VGLL4	Pig	2.50722e-08	0.825674	511	264	0.000916263	Up-regulated
GPR137C	Pig	2.52264e-08	2.59083	212	46	0.000921898	Up-regulated
AGMO	Pig	2.65847e-08	1.21023	269	81	0.000971537	Up-regulated
ROCK2	Pig	2.70766e-08	0.813437	0.58	335	0.000989515	Up-regulated
CDC14A	Pig	2.7575e-08	1.22403	272	81	0.00100773	Up-regulated
ENSSSCG00000050322	Pig	2.80313e-08	4.59731	149	5	0.0010244	Up-regulated
RAB6A	Pig	2.95443e-08	1.07719	335	117	0.0010797	Up-regulated
CTDSPL2	Pig	2.98997e-08	0.727298	409	178	0.00109268	Up-regulated
UBR5	Pig	3.00925e-08	0.712303	638	381	0.00109973	Up-regulated
SRPK2	Pig	3.02901e-08	0.892449	543	294	0.00110695	Up-regulated
CHD1	Pig	3.18842e-08	0.716457	448	198	0.00116521	Up-regulated
NRP1	Pig	3.21684e-08	0.579459	842	655	0.0011756	Up-regulated
SDCBP	Pig	3.22614e-08	0.53891	377	142	0.00117899	Up-regulated
RPL28	Pig	3.23325e-08	0.81519	283	81	0.00118159	Up-regulated
TRMT1L	Pig	3.2413e-08	0.684516	374	152	0.00118453	Up-regulated
FABP4	Pig	3.30653e-08	1.07187	0.42	198	0.00120837	Up-regulated
ZFAND3	Pig	3.54643e-08	0.508706	0.81	599	0.00129604	Up-regulated
CPEB2	Pig	3.59025e-08	0.841656	0.3	96	0.00131206	Up-regulated
DPY19L1	Pig	3.79417e-08	0.976688	335	127	0.00138658	Up-regulated
HCLS1	Pig	3.97036e-08	1.65171	0.24	61	0.00145097	Up-regulated
CHST11	Pig	4.08845e-08	0.610811	411	183	0.00149412	Up-regulated
RYBP	Pig	4.35256e-08	1.32953	341	137	0.00159064	Up-regulated
PHKB	Pig	4.4522e-08	0.787994	419	183	0.00162706	Up-regulated
MBNL2	Pig	4.57388e-08	0.548474	625	355	0.00167153	Up-regulated
FBXL7	Pig	4.62356e-08	0.702038	812	599	0.00168968	Up-regulated
DDI1	Pig	4.91434e-08	3.46288	162	15	0.00179594	Up-regulated
ITGA2	Pig	4.93098e-08	2.0503	214	46	0.00180203	Up-regulated
RUNX2	Pig	4.9383e-08	4.95787	144	5	0.0018047	Up-regulated
MIF	Pig	5.01861e-08	2.29837	165	15	0.00183405	Up-regulated
SH3BGRL2	Pig	5.14563e-08	2.26643	172	0.02	0.00188047	Up-regulated
LCOR	Pig	5.34378e-08	0.62001	563	305	0.00195288	Up-regulated
SLC16A3	Pig	5.50556e-08	7.0399	133	0	0.00201201	Up-regulated
LAMP2	Pig	5.54243e-08	1.60037	245	66	0.00202548	Up-regulated
DISP1	Pig	5.60554e-08	0.794125	692	462	0.00204855	Up-regulated
CAVIN1	Pig	5.93046e-08	1.16242	318	112	0.00216729	Up-regulated
TRAF3	Pig	6.07042e-08	0.70396	319	112	0.00221843	Up-regulated
CANX	Pig	6.31473e-08	1.38089	286	96	0.00230772	Up-regulated
ZNF644	Pig	6.46617e-08	0.750334	528	279	0.00236306	Up-regulated
CNOT4	Pig	6.56571e-08	0.544864	576	0.32	0.00239944	Up-regulated
OSBPL8	Pig	6.72128e-08	0.566458	558	294	0.00245629	Up-regulated
RELL1	Pig	7.07037e-08	1.52	186	0.03	0.00258387	Up-regulated
FCHSD2	Pig	7.19303e-08	0.506579	0.63	371	0.00262869	Up-regulated
SKAP2	Pig	7.5403e-08	0.794236	0.22	51	0.0027556	Up-regulated
ANKRD50	Pig	7.59339e-08	2.65587	191	36	0.002775	Up-regulated
RALA	Pig	7.63436e-08	0.852331	343	127	0.00278998	Up-regulated
SEPTIN2	Pig	8.28835e-08	1.7447	212	46	0.00302898	Up-regulated
MECOM	Pig	8.32116e-08	0.567994	939	858	0.00304097	Up-regulated
VWA1	Pig	8.37359e-08	2.71154	191	36	0.00306013	Up-regulated
SCAMP1	Pig	8.53724e-08	1.52036	205	41	0.00311993	Up-regulated
TSC22D2	Pig	8.59753e-08	1.93839	0.23	61	0.00314197	Up-regulated
VCL	Pig	8.90711e-08	0.753768	0.46	234	0.0032551	Up-regulated
H3-5	Pig	9.01125e-08	1.07898	405	188	0.00329316	Up-regulated
ABL2	Pig	9.03771e-08	1.3464	284	96	0.00330283	Up-regulated
DAPK2	Pig	9.16167e-08	7.24957	129	0	0.00334813	Up-regulated
ENSSSCG00000016119	Pig	9.56711e-08	1.17596	351	157	0.0034963	Up-regulated
SLC20A2	Pig	9.70585e-08	1.84711	0.24	71	0.003547	Up-regulated
LIFR	Pig	9.88411e-08	0.84457	667	472	0.00361215	Up-regulated
CCN1	Pig	1.02128e-07	4.41018	147	0.01	0.00373228	Up-regulated
RCSD1	Pig	1.03029e-07	1.00533	392	173	0.0037652	Up-regulated
SLC9A1	Pig	1.04272e-07	2.55874	191	36	0.00381063	Up-regulated
ENSSSCG00000011272	Pig	1.05815e-07	1.46169	235	61	0.00386702	Up-regulated
CAV1	Pig	1.2139e-07	0.538704	581	315	0.00443619	Up-regulated
COL12A1	Pig	1.22646e-07	2.89489	208	51	0.00448208	Up-regulated
HSPA8	Pig	1.27798e-07	1.27309	326	132	0.00467037	Up-regulated
TGM2	Pig	1.29016e-07	1.50891	254	76	0.0047149	Up-regulated
PDLIM5	Pig	1.30585e-07	0.624593	635	376	0.00477224	Up-regulated
SWT1	Pig	1.31755e-07	0.961936	526	294	0.00481498	Up-regulated
RBM45	Pig	1.31833e-07	2.54498	196	41	0.00481784	Up-regulated
BTBD1	Pig	1.32073e-07	1.42185	0.26	81	0.00482662	Up-regulated
MEMO1	Pig	1.35993e-07	0.790914	337	127	0.00496988	Up-regulated
ENSSSCG00000030362	Pig	1.36447e-07	0.936585	366	168	0.00498644	Up-regulated
SCFD1	Pig	1.38424e-07	0.980638	0.29	96	0.0050587	Up-regulated
CXCL10	Pig	1.39116e-07	6.329	135	5	0.00508401	Up-regulated
MAN1A1	Pig	1.39748e-07	1.49232	241	71	0.00510707	Up-regulated
TTC14	Pig	1.39757e-07	0.595936	383	162	0.00510743	Up-regulated
TPM4	Pig	1.41599e-07	0.834377	319	117	0.00517474	Up-regulated
ENSSSCG00000022032	Pig	1.41938e-07	1.28533	0.28	96	0.00518712	Up-regulated
ENSSSCG00000010448	Pig	1.42842e-07	1.60808	0.22	56	0.00522015	Up-regulated
TRIO	Pig	1.46485e-07	0.51747	806	619	0.00535329	Up-regulated
TDRP	Pig	1.4843e-07	1.17967	261	81	0.00542437	Up-regulated
ETS2	Pig	1.50085e-07	0.754185	379	168	0.00548487	Up-regulated
ELP4	Pig	1.51261e-07	1.4637	257	81	0.00552782	Up-regulated
SH3D19	Pig	1.5517e-07	0.576722	0.56	315	0.00567068	Up-regulated
PALD1	Pig	1.56197e-07	0.609549	399	178	0.00570823	Up-regulated
SLC25A13	Pig	1.629e-07	0.920575	333	132	0.00595317	Up-regulated
MYO6	Pig	1.65413e-07	0.752447	579	0.33	0.00604503	Up-regulated
IPO11	Pig	1.68439e-07	0.564967	394	168	0.00615559	Up-regulated
CCDC6	Pig	1.76591e-07	1.47041	233	66	0.0064535	Up-regulated
PIK3C3	Pig	1.83126e-07	0.903921	319	122	0.00669233	Up-regulated
CHRM2	Pig	1.84792e-07	3.94163	134	5	0.00675321	Up-regulated
FAM168A	Pig	1.89637e-07	0.993951	328	132	0.00693027	Up-regulated
AGPS	Pig	1.90258e-07	0.590527	355	142	0.00695298	Up-regulated
CTSC	Pig	2.06911e-07	3.64996	142	0.01	0.00756156	Up-regulated
MDM2	Pig	2.15419e-07	1.60401	274	96	0.00787247	Up-regulated
PRELID2	Pig	2.15611e-07	0.993013	222	56	0.00787951	Up-regulated
CHORDC1	Pig	2.21844e-07	1.22346	258	81	0.00810728	Up-regulated
SMARCAD1	Pig	2.22556e-07	1.07581	262	81	0.00813331	Up-regulated
SLC44A1	Pig	2.25842e-07	0.693812	374	162	0.00825341	Up-regulated
XPNPEP1	Pig	2.27163e-07	0.819498	268	86	0.00830168	Up-regulated
ZRANB1	Pig	2.30439e-07	1.53213	0.24	71	0.00842138	Up-regulated
RFTN2	Pig	2.33953e-07	0.635399	0.28	91	0.00854982	Up-regulated
CAVIN2	Pig	2.50997e-07	0.627509	363	152	0.0091727	Up-regulated
AASDHPPT	Pig	2.61477e-07	1.16235	181	0.03	0.00955567	Up-regulated
CNOT2	Pig	2.61596e-07	0.748975	526	289	0.00956003	Up-regulated
CHRNB1	Pig	2.69315e-07	3.32793	157	0.02	0.00984213	Up-regulated
ZNF407	Pig	2.78376e-07	0.702332	515	279	0.0101732	Up-regulated
RNF11	Pig	2.78636e-07	2.30774	197	46	0.0101828	Up-regulated
RHOB	Pig	2.79777e-07	1.20096	231	66	0.0102244	Up-regulated
PRMT3	Pig	2.83654e-07	1.11701	0.25	76	0.0103661	Up-regulated
SHOC2	Pig	2.86617e-07	0.773695	407	183	0.0104744	Up-regulated
GNPTAB	Pig	2.89031e-07	1.33094	222	61	0.0105626	Up-regulated
RPL11	Pig	3.00363e-07	1.35931	211	51	0.0109768	Up-regulated
TXNL1	Pig	3.0312e-07	1.03661	292	107	0.0110775	Up-regulated
ISG15	Pig	3.17673e-07	1.79631	0.26	91	0.0116093	Up-regulated
PPP2R5E	Pig	3.23913e-07	0.684043	511	269	0.0118374	Up-regulated
MB21D2	Pig	3.27885e-07	2.27534	187	41	0.0119825	Up-regulated
HLTF	Pig	3.28746e-07	0.684842	326	127	0.012014	Up-regulated
UBE2B	Pig	3.50439e-07	1.02606	336	137	0.0128068	Up-regulated
CPEB4	Pig	3.51184e-07	1.12926	312	127	0.012834	Up-regulated
UBC	Pig	3.55393e-07	0.777951	256	81	0.0129878	Up-regulated
LBR	Pig	3.65691e-07	1.50213	203	46	0.0133642	Up-regulated
LASP1	Pig	3.6818e-07	1.6733	207	51	0.0134551	Up-regulated
TMEM170A	Pig	3.72809e-07	2.59769	157	0.02	0.0136243	Up-regulated
GTF2F2	Pig	3.826e-07	0.666844	289	107	0.0139821	Up-regulated
RNF19A	Pig	3.85909e-07	0.722055	428	203	0.0141031	Up-regulated
ENSSSCG00000003839	Pig	3.8776e-07	0.93557	611	421	0.0141707	Up-regulated
RAB1A	Pig	3.99072e-07	0.653386	339	132	0.0145841	Up-regulated
GBF1	Pig	4.21993e-07	0.675988	517	274	0.0154217	Up-regulated
ANXA1	Pig	4.27438e-07	1.14624	181	36	0.0156207	Up-regulated
KDM3A	Pig	4.28937e-07	1.0326	343	147	0.0156755	Up-regulated
SKIL	Pig	4.92824e-07	0.912965	327	137	0.0180103	Up-regulated
ENSSSCG00000011237	Pig	4.94651e-07	0.57143	488	249	0.018077	Up-regulated
HSD17B12	Pig	5.05044e-07	1.15975	243	76	0.0184568	Up-regulated
EIF3H	Pig	5.17084e-07	0.906583	312	122	0.0188968	Up-regulated
UBE2D3	Pig	5.22148e-07	0.793054	368	168	0.0190819	Up-regulated
PPP4R1	Pig	5.36467e-07	0.917189	288	107	0.0196052	Up-regulated
EXTL3	Pig	5.45471e-07	2.40104	154	0.02	0.0199342	Up-regulated
ZNF277	Pig	5.52019e-07	1.56544	197	46	0.0201735	Up-regulated
ITM2C	Pig	5.59303e-07	6.66229	115	0	0.0204397	Up-regulated
NEDD4	Pig	5.60123e-07	0.650923	352	157	0.0204697	Up-regulated
BTBD3	Pig	5.62834e-07	1.76546	188	41	0.0205688	Up-regulated
DLL4	Pig	5.6292e-07	2.3603	0.17	0.03	0.0205719	Up-regulated
S100A10	Pig	5.96957e-07	2.58735	169	0.03	0.0218158	Up-regulated
LIMA1	Pig	6.02013e-07	0.705976	343	147	0.0220006	Up-regulated
DR1	Pig	6.07231e-07	2.26868	162	25	0.0221913	Up-regulated
IPMK	Pig	6.10074e-07	1.34614	181	36	0.0222952	Up-regulated
SENP6	Pig	6.1324e-07	0.652588	546	299	0.0224108	Up-regulated
ENSSSCG00000039894	Pig	6.15422e-07	0.612544	447	223	0.0224906	Up-regulated
MAP3K1	Pig	6.35999e-07	0.509957	419	203	0.0232426	Up-regulated
ATG2B	Pig	6.40776e-07	1.18143	232	71	0.0234172	Up-regulated
FHOD1	Pig	6.50983e-07	2.7639	142	15	0.0237902	Up-regulated
AUH	Pig	6.5253e-07	0.734401	395	193	0.0238467	Up-regulated
TMEM123	Pig	6.55452e-07	1.98217	184	41	0.0239535	Up-regulated
ENSSSCG00000017509	Pig	6.64242e-07	1.46812	212	56	0.0242747	Up-regulated
HSP90B1	Pig	6.8516e-07	1.20405	198	46	0.0250392	Up-regulated
FNIP1	Pig	6.89234e-07	0.740412	383	173	0.0251881	Up-regulated
NES	Pig	6.99127e-07	1.79614	157	25	0.0255496	Up-regulated
COL4A2	Pig	7.15883e-07	0.500326	831	579	0.0261619	Up-regulated
AMOTL2	Pig	7.20533e-07	2.14272	161	25	0.0263319	Up-regulated
PCMTD1	Pig	7.34304e-07	0.765244	414	213	0.0268352	Up-regulated
PCYT1A	Pig	7.49201e-07	0.97458	0.23	66	0.0273795	Up-regulated
NOVA1	Pig	7.53495e-07	0.866098	458	249	0.0275365	Up-regulated
ACOT11	Pig	7.59131e-07	3.22885	133	0.01	0.0277424	Up-regulated
SERINC5	Pig	7.60362e-07	1.102	308	127	0.0277874	Up-regulated
ARL5A	Pig	7.61098e-07	1.45066	202	51	0.0278143	Up-regulated
ENSSSCG00000026960	Pig	7.63612e-07	0.529336	455	223	0.0279062	Up-regulated
HOOK3	Pig	7.68797e-07	0.665086	492	259	0.0280957	Up-regulated
UGP2	Pig	7.95922e-07	1.50493	0.22	66	0.029087	Up-regulated
ZMYM4	Pig	7.96363e-07	0.602226	343	142	0.0291031	Up-regulated
ECPAS	Pig	8.06754e-07	0.737788	475	249	0.0294828	Up-regulated
ENSSSCG00000028414	Pig	8.07704e-07	1.4655	209	56	0.0295176	Up-regulated
MOSPD2	Pig	8.10752e-07	0.699771	0.28	102	0.0296289	Up-regulated
SMG7	Pig	8.12639e-07	0.742385	328	132	0.0296979	Up-regulated
LRCH3	Pig	8.19643e-07	0.694649	508	274	0.0299539	Up-regulated
MIER1	Pig	8.29001e-07	0.658156	454	228	0.0302958	Up-regulated
FAM111A	Pig	8.31898e-07	6.46748	112	0	0.0304017	Up-regulated
CDK17	Pig	8.54225e-07	0.556256	757	533	0.0312177	Up-regulated
RPL18	Pig	8.54419e-07	0.762634	247	81	0.0312247	Up-regulated
SPATA5	Pig	8.64822e-07	0.536242	383	183	0.0316049	Up-regulated
ESCO1	Pig	8.6636e-07	0.750358	415	208	0.0316611	Up-regulated
TMEM65	Pig	8.90369e-07	1.39457	216	61	0.0325385	Up-regulated
FBN1	Pig	8.94585e-07	0.717924	578	355	0.0326926	Up-regulated
RAP1A	Pig	8.94947e-07	0.544632	576	0.34	0.0327058	Up-regulated
ERBIN	Pig	9.2192e-07	0.538762	659	391	0.0336916	Up-regulated
PRICKLE1	Pig	9.26408e-07	1.36267	242	81	0.0338556	Up-regulated
SPPL3	Pig	9.65757e-07	0.527891	514	274	0.0352936	Up-regulated
RNF152	Pig	9.72984e-07	1.33019	205	56	0.0355577	Up-regulated
MTMR10	Pig	9.76207e-07	0.839746	314	127	0.0356755	Up-regulated
ENSSSCG00000036115	Pig	9.88543e-07	1.35314	0.27	102	0.0361263	Up-regulated
MAPRE2	Pig	1.00209e-06	1.17645	308	127	0.0366213	Up-regulated
EDEM3	Pig	1.00757e-06	1.51207	229	71	0.0368216	Up-regulated
DGKI	Pig	1.0139e-06	7.04854	0.11	0	0.0370529	Up-regulated
RMND5A	Pig	1.06728e-06	2.50899	148	0.02	0.0390039	Up-regulated
STK38L	Pig	1.12853e-06	0.93486	286	107	0.0412422	Up-regulated
C16orf72	Pig	1.15105e-06	1.19359	251	86	0.0420651	Up-regulated
BIRC3	Pig	1.15549e-06	0.975278	0.42	228	0.0422273	Up-regulated
MTSS1	Pig	1.24819e-06	0.529549	304	122	0.045615	Up-regulated
USP6NL	Pig	1.28744e-06	0.997938	236	76	0.0470494	Up-regulated
RANBP6	Pig	1.30857e-06	1.10034	242	81	0.0478216	Up-regulated
LEMD3	Pig	1.33112e-06	1.27464	236	76	0.0486457	Up-regulated
TTN	Pig	7.47345e-172	-9.36942	6	614	2.73117e-167	Down-regulated
PDE3A	Pig	2.66314e-124	-6.3885	7	472	9.73246e-120	Down-regulated
CD55	Human	9.24636e-105	-6.04213	18	457	3.37908e-100	Down-regulated
PCDH7	Pig	6.60518e-81	-11.896	0	279	2.41386e-76	Down-regulated
ENSSSCG00000011121	Pig	4.50669e-77	-5.2888	43	452	1.64697e-72	Down-regulated
THRB	Pig	1.12062e-73	-4.90992	27	391	4.09529e-69	Down-regulated
DMD	Pig	1.63803e-72	-5.92728	36	411	5.98619e-68	Down-regulated
ENSSSCG00000009125	Pig	1.21052e-71	-9.20695	2	259	4.42385e-67	Down-regulated
RYR2	Pig	8.15827e-69	-10.6352	1	244	2.98144e-64	Down-regulated
COL3A1	Pig	3.68203e-67	-8.57817	2	244	1.3456e-62	Down-regulated
PRKG1	Pig	2.83556e-65	-6.17845	19	0.33	1.03625e-60	Down-regulated
ENSSSCG00000004207	Pig	3.8199e-63	-11.7571	0	218	1.39598e-58	Down-regulated
ENSSSCG00000005518	Pig	3.4832e-53	-2.37974	515	843	1.27293e-48	Down-regulated
UST	Pig	3.30329e-48	-7.69193	1	173	1.20719e-43	Down-regulated
LPL	Pig	4.48361e-48	-7.33884	2	178	1.63854e-43	Down-regulated
ABLIM3	Pig	2.29272e-46	-1.81056	829	944	8.37874e-42	Down-regulated
CTNNA3	Pig	1.13369e-43	-8.49266	2	168	4.14306e-39	Down-regulated
ROR1	Pig	1.25702e-43	-6.47035	4	178	4.5938e-39	Down-regulated
SEMA5A	Pig	1.73621e-42	-8.46396	1	152	6.34498e-38	Down-regulated
CD163	Pig	1.37742e-39	-8.65693	1	142	5.03376e-35	Down-regulated
ACSS3	Pig	2.41593e-38	-6.02795	6	173	8.82902e-34	Down-regulated
ENSSSCG00000010212	Pig	5.51089e-38	-8.87396	3	152	2.01396e-33	Down-regulated
ADGRD1	Pig	1.19542e-36	-5.93327	5	157	4.36867e-32	Down-regulated
MCF2L	Pig	4.6385e-36	-3.07229	241	584	1.69514e-31	Down-regulated
ATOH8	Pig	5.51761e-36	-3.69726	44	294	2.01641e-31	Down-regulated
SPON1	Pig	7.4327e-36	-5.01713	17	208	2.71628e-31	Down-regulated
DCN	Pig	1.66402e-35	-4.86027	6	162	6.08117e-31	Down-regulated
ABCA6	Pig	5.50249e-35	-4.93124	4	147	2.01088e-30	Down-regulated
PDE1A	Pig	1.63526e-34	-4.78575	0.01	178	5.97605e-30	Down-regulated
ENSSSCG00000024973	Pig	1.95641e-34	-3.8898	235	558	7.14971e-30	Down-regulated
ENSSSCG00000009672	Pig	2.34529e-34	-5.84682	0.01	173	8.57085e-30	Down-regulated
EBF2	Pig	2.93572e-34	-5.99537	6	157	1.07286e-29	Down-regulated
ABCA9	Pig	8.2345e-34	-7.55249	1	122	3.0093e-29	Down-regulated
SYNPO2	Pig	1.35731e-33	-6.98887	2	132	4.96029e-29	Down-regulated
ABCA8	Pig	1.51234e-33	-5.88137	8	162	5.52686e-29	Down-regulated
CDH2	Pig	1.04693e-32	-10.658	0	112	3.826e-28	Down-regulated
CCDC141	Pig	1.96284e-32	-8.63628	1	117	7.17321e-28	Down-regulated
MFAP5	Pig	3.69651e-32	-6.57845	2	127	1.35089e-27	Down-regulated
SETBP1	Pig	1.8545e-30	-4.06394	33	239	6.77725e-26	Down-regulated
EVA1C	Pig	2.93148e-30	-2.44994	301	604	1.07131e-25	Down-regulated
MME	Pig	1.46817e-29	-8.49728	1	107	5.36541e-25	Down-regulated
EDA	Pig	1.47758e-29	-5.60456	13	168	5.39983e-25	Down-regulated
FOXP2	Pig	2.18055e-29	-5.86978	3	122	7.96881e-25	Down-regulated
ATRNL1	Pig	2.31019e-29	-4.3826	17	183	8.4426e-25	Down-regulated
MEIS2	Pig	4.93602e-29	-4.32688	7	142	1.80387e-24	Down-regulated
MX2	Pig	6.20168e-29	-2.05358	337	675	2.2664e-24	Down-regulated
MLIP	Pig	2.03114e-28	-10.3509	0	96	7.42279e-24	Down-regulated
FBLN5	Pig	3.85549e-28	-7.73578	1	102	1.40899e-23	Down-regulated
NTRK2	Pig	1.73282e-27	-5.36838	14	162	6.33261e-23	Down-regulated
FHOD3	Pig	3.03903e-27	-6.34152	6	127	1.11061e-22	Down-regulated
ANTXR1	Pig	3.05647e-27	-5.22433	11	152	1.11699e-22	Down-regulated
ENSSSCG00000015747	Pig	1.01839e-26	-8.47234	1	96	3.7217e-22	Down-regulated
JCAD	Pig	1.85914e-26	-2.64448	246	533	6.79425e-22	Down-regulated
COL6A3	Pig	6.3561e-26	-5.16351	9	137	2.32284e-21	Down-regulated
ARHGAP24	Pig	1.28136e-25	-3.11717	92	0.34	4.68273e-21	Down-regulated
PTPRD	Pig	1.44328e-25	-9.19657	0	86	5.27447e-21	Down-regulated
EPB41L3	Pig	1.44328e-25	-9.24779	0	86	5.27447e-21	Down-regulated
VEGFD	Pig	2.73199e-25	-8.02085	1	91	9.98406e-21	Down-regulated
ASS1	Pig	1.05685e-24	-4.67759	17	162	3.86226e-20	Down-regulated
PCSK6	Pig	1.15124e-24	-4.53981	25	188	4.20721e-20	Down-regulated
BTNL9	Pig	1.65633e-24	-2.93674	119	376	6.05307e-20	Down-regulated
ZEB2	Pig	2.38152e-24	-3.86317	0.03	203	8.70327e-20	Down-regulated
PDZRN3	Pig	3.09109e-24	-5.92562	5	112	1.12964e-19	Down-regulated
PDE3B	Pig	3.88833e-24	-4.30693	24	183	1.42099e-19	Down-regulated
PCDH9	Pig	4.45802e-24	-7.36449	4	107	1.62918e-19	Down-regulated
MRC2	Pig	6.36011e-24	-6.01032	7	122	2.3243e-19	Down-regulated
SOX6	Pig	7.15843e-24	-7.53781	1	86	2.61605e-19	Down-regulated
TNXB	Pig	7.83157e-24	-5.49325	0.01	132	2.86205e-19	Down-regulated
RNF180	Pig	9.11178e-24	-6.70647	2	96	3.3299e-19	Down-regulated
HMCN2	Pig	1.6806e-23	-6.02716	6	117	6.14175e-19	Down-regulated
COL1A2	Pig	5.34982e-23	-5.74916	8	122	1.95509e-18	Down-regulated
CACNB2	Pig	6.37519e-23	-3.5932	48	239	2.32981e-18	Down-regulated
ABI3BP	Pig	1.30212e-22	-5.7037	7	117	4.75859e-18	Down-regulated
BICC1	Pig	1.42777e-22	-3.71115	18	157	5.21778e-18	Down-regulated
ENSSSCG00000023014	Pig	1.52964e-22	-3.10469	77	294	5.59006e-18	Down-regulated
LPAR1	Pig	1.5443e-22	-4.96984	7	117	5.64363e-18	Down-regulated
ARHGEF10L	Pig	1.88638e-22	-8.69123	1	81	6.89379e-18	Down-regulated
TMCC3	Pig	1.92766e-22	-2.09618	451	0.67	7.04463e-18	Down-regulated
SEC14L1	Pig	4.99148e-22	-2.39785	312	558	1.82414e-17	Down-regulated
HERC6	Pig	6.51416e-22	-2.02161	609	736	2.3806e-17	Down-regulated
SLCO3A1	Pig	2.7195e-21	-5.37942	4	96	9.93842e-17	Down-regulated
GBP2	Pig	2.84412e-21	-2.66042	239	487	1.03938e-16	Down-regulated
ENSSSCG00000026430	Pig	4.13087e-21	-3.11181	76	284	1.50962e-16	Down-regulated
MTARC2	Pig	6.51203e-21	-6.08685	2	81	2.37982e-16	Down-regulated
EGFR	Pig	1.01264e-20	-4.0805	22	162	3.70068e-16	Down-regulated
ZNF423	Pig	2.0645e-20	-2.31918	207	457	7.5447e-16	Down-regulated
MCC	Pig	3.24669e-20	-1.20359	863	883	1.1865e-15	Down-regulated
CNTN3	Pig	5.51546e-20	-7.36196	4	91	2.01563e-15	Down-regulated
ZBTB16	Pig	6.24054e-20	-0.979396	863	893	2.2806e-15	Down-regulated
NAALADL2	Pig	9.43525e-20	-4.17331	28	173	3.44811e-15	Down-regulated
GRK3	Pig	1.29405e-19	-7.88507	1	71	4.72911e-15	Down-regulated
GATA4	Pig	1.30651e-19	-7.74248	1	71	4.77463e-15	Down-regulated
DAAM2	Pig	1.38377e-19	-6.94184	1	71	5.05699e-15	Down-regulated
MATN2	Pig	1.68675e-19	-4.41787	19	147	6.16424e-15	Down-regulated
TENM3	Pig	6.85498e-19	-5.53448	5	91	2.50515e-14	Down-regulated
CTTNBP2	Pig	7.49539e-19	-4.6831	5	91	2.73919e-14	Down-regulated
MGP	Pig	8.37284e-19	-4.29381	0.01	112	3.05986e-14	Down-regulated
BMPR1A	Pig	8.42543e-19	-4.50862	0.01	112	3.07908e-14	Down-regulated
GPC3	Pig	1.14103e-18	-4.97029	11	117	4.16991e-14	Down-regulated
COLEC12	Pig	1.3144e-18	-3.43407	26	162	4.80349e-14	Down-regulated
SVEP1	Pig	2.40191e-18	-5.28877	3	81	8.77778e-14	Down-regulated
WASF3	Pig	2.42751e-18	-4.97653	9	107	8.87134e-14	Down-regulated
NOTCH2	Pig	2.44301e-18	-5.00323	9	107	8.92798e-14	Down-regulated
SF3B1	Pig	2.67668e-18	-1.93371	407	579	9.78194e-14	Down-regulated
ENOX1	Pig	2.79212e-18	-4.17867	9	107	1.02038e-13	Down-regulated
ADARB2	Pig	3.19206e-18	-7.59205	2	76	1.16654e-13	Down-regulated
CEP126	Pig	3.36839e-18	-7.84363	1	66	1.23098e-13	Down-regulated
RCAN2	Pig	3.36839e-18	-8.29776	1	66	1.23098e-13	Down-regulated
RIPOR3	Pig	4.04478e-18	-6.27396	2	71	1.47816e-13	Down-regulated
HPGD	Pig	4.15415e-18	-5.83459	2	71	1.51813e-13	Down-regulated
IL1RAPL1	Pig	5.50142e-18	-3.97884	45	203	2.01049e-13	Down-regulated
LNX1	Pig	6.70341e-18	-2.15345	0.22	467	2.44976e-13	Down-regulated
ADAM22	Pig	6.78643e-18	-5.31095	6	91	2.4801e-13	Down-regulated
HPCAL1	Pig	8.03934e-18	-2.34783	259	477	2.93798e-13	Down-regulated
PRKAG2	Pig	1.18958e-17	-3.48368	59	228	4.34734e-13	Down-regulated
CKM	Pig	8.73074e-17	-7.56334	1	61	3.19065e-12	Down-regulated
MYOZ2	Pig	8.73074e-17	-8.16914	1	61	3.19065e-12	Down-regulated
CDH11	Pig	9.367e-17	-6.00617	12	112	3.42317e-12	Down-regulated
SLC1A3	Pig	9.55748e-17	-7.56279	2	66	3.49278e-12	Down-regulated
FHL2	Pig	9.642e-17	-8.18048	2	66	3.52367e-12	Down-regulated
ELN	Pig	9.90001e-17	-6.19622	2	66	3.61796e-12	Down-regulated
MARK1	Pig	1.00758e-16	-6.05587	2	66	3.6822e-12	Down-regulated
RORA	Pig	1.07833e-16	-2.73295	256	457	3.94077e-12	Down-regulated
MAGI2	Pig	1.19518e-16	-4.14985	0.03	162	4.36779e-12	Down-regulated
DENND2A	Pig	1.81355e-16	-4.6066	21	137	6.62762e-12	Down-regulated
RGMA	Pig	3.26776e-16	-4.06782	11	107	1.1942e-11	Down-regulated
SULF1	Pig	4.94784e-16	-3.04371	29	157	1.80819e-11	Down-regulated
ZFPM2	Pig	9.04604e-16	-1.99934	83	269	3.30587e-11	Down-regulated
SORBS1	Pig	1.15595e-15	-1.60416	514	0.67	4.22441e-11	Down-regulated
PTGFR	Pig	1.28296e-15	-8.19201	0	51	4.68856e-11	Down-regulated
MYBPC3	Pig	1.28296e-15	-9.44875	0	51	4.68856e-11	Down-regulated
SEMA3C	Pig	1.28296e-15	-8.48039	0	51	4.68856e-11	Down-regulated
SLC27A6	Pig	1.83659e-15	-6.7921	2	66	6.71181e-11	Down-regulated
ENPEP	Pig	2.27429e-15	-7.5659	1	56	8.31138e-11	Down-regulated
FLT1	Pig	4.23546e-15	-1.36159	743	787	1.54785e-10	Down-regulated
STXBP6	Pig	4.31662e-15	-2.48405	59	218	1.57751e-10	Down-regulated
GLIS3	Pig	5.14935e-15	-2.85687	0.04	178	1.88183e-10	Down-regulated
DHRS3	Pig	5.30811e-15	-2.4005	91	269	1.93985e-10	Down-regulated
COL5A1	Pig	6.45642e-15	-3.34442	38	173	2.3595e-10	Down-regulated
NDFIP1	Pig	9.44542e-15	-1.8731	373	548	3.45183e-10	Down-regulated
HIPK2	Pig	1.00861e-14	-1.62116	387	574	3.68595e-10	Down-regulated
ENSSSCG00000005095	Pig	1.22131e-14	-0.9363	879	878	4.46329e-10	Down-regulated
ALDH1A2	Pig	1.25025e-14	-3.96811	0.03	152	4.56905e-10	Down-regulated
ITGA8	Pig	1.2711e-14	-5.03391	4	71	4.64524e-10	Down-regulated
KCNQ5	Pig	1.29918e-14	-5.82479	4	71	4.74784e-10	Down-regulated
ROBO1	Pig	2.4249e-14	-5.59517	3	66	8.86181e-10	Down-regulated
ENSSSCG00000031640	Pig	3.37157e-14	-9.08147	0	46	1.23214e-09	Down-regulated
TEX26	Pig	3.37157e-14	-8.08013	0	46	1.23214e-09	Down-regulated
PDE4D	Pig	3.98264e-14	-1.19637	648	751	1.45546e-09	Down-regulated
PTPRJ	Pig	4.28809e-14	-4.51187	23	132	1.56708e-09	Down-regulated
ART4	Pig	4.42179e-14	-5.43484	2	61	1.61594e-09	Down-regulated
ADAMTS15	Pig	4.49329e-14	-5.7547	2	61	1.64207e-09	Down-regulated
FBLN1	Pig	4.75664e-14	-4.54528	6	76	1.73831e-09	Down-regulated
ENSSSCG00000036029	Pig	4.83465e-14	-4.0661	18	117	1.76682e-09	Down-regulated
MYH7	Pig	5.78703e-14	-7.83859	1	51	2.11487e-09	Down-regulated
NCAM1	Pig	5.83741e-14	-6.73114	2	56	2.13328e-09	Down-regulated
ALPL	Pig	6.03009e-14	-3.15807	0.03	147	2.2037e-09	Down-regulated
LAMC2	Pig	6.19808e-14	-5.66871	2	56	2.26509e-09	Down-regulated
AGTR1	Pig	6.35126e-14	-3.77116	1	51	2.32107e-09	Down-regulated
ENSSSCG00000017146	Pig	7.89463e-14	-1.59082	423	604	2.88509e-09	Down-regulated
TNIK	Pig	9.20672e-14	-4.45629	7	81	3.3646e-09	Down-regulated
ROBO4	Pig	9.23599e-14	-1.80871	497	629	3.37529e-09	Down-regulated
COL1A1	Pig	1.60656e-13	-4.25587	15	107	5.87119e-09	Down-regulated
ENSSSCG00000007735	Pig	1.96558e-13	-1.88944	316	492	7.18323e-09	Down-regulated
ENSSSCG00000003909	Pig	2.41953e-13	-2.1068	314	492	8.84216e-09	Down-regulated
LIN7A	Pig	2.66873e-13	-4.60901	6	76	9.75287e-09	Down-regulated
KAZN	Pig	2.83443e-13	-3.71256	68	213	1.03584e-08	Down-regulated
OAS2	Pig	3.18531e-13	-1.58046	322	518	1.16407e-08	Down-regulated
TGFB2	Pig	5.05531e-13	-3.54895	18	112	1.84746e-08	Down-regulated
SNRNP70	Pig	7.217e-13	-1.25598	503	619	2.63745e-08	Down-regulated
CMIP	Pig	7.76334e-13	-1.11973	752	797	2.83711e-08	Down-regulated
ETV1	Pig	8.03603e-13	-4.05125	6	71	2.93677e-08	Down-regulated
COL6A1	Pig	8.57655e-13	-3.43096	11	91	3.1343e-08	Down-regulated
TNNC1	Pig	8.87267e-13	-8.5035	0	41	3.24252e-08	Down-regulated
IRS1	Pig	8.87267e-13	-7.6215	0	41	3.24252e-08	Down-regulated
PLPP4	Pig	9.23345e-13	-5.65154	2	56	3.37436e-08	Down-regulated
KCNJ8	Pig	1.37696e-12	-6.81656	2	51	5.03211e-08	Down-regulated
KDM5D	Pig	1.53314e-12	-3.41835	31	142	5.60285e-08	Down-regulated
LEPR	Pig	1.53439e-12	-6.99416	1	46	5.60744e-08	Down-regulated
TNS3	Pig	2.0823e-12	-4.18493	9	81	7.60976e-08	Down-regulated
LRIG1	Pig	2.57819e-12	-3.60867	0.03	137	9.42199e-08	Down-regulated
ACE	Pig	2.76672e-12	-3.19994	14	96	1.0111e-07	Down-regulated
ENSSSCG00000032599	Pig	3.19453e-12	-2.64181	86	239	1.16744e-07	Down-regulated
GSTO2	Pig	4.97711e-12	-4.13249	16	102	1.81888e-07	Down-regulated
EFNA5	Pig	6.47927e-12	-4.2772	8	76	2.36785e-07	Down-regulated
ZNF704	Pig	7.89725e-12	-2.56819	0.09	244	2.88605e-07	Down-regulated
MAMDC2	Pig	8.37363e-12	-5.1019	0.01	81	3.06014e-07	Down-regulated
RIMKLB	Pig	1.04358e-11	-5.74928	3	56	3.81377e-07	Down-regulated
ARHGAP22	Pig	1.0979e-11	-5.17517	3	56	4.01229e-07	Down-regulated
CRISPLD2	Pig	1.14666e-11	-4.42712	3	56	4.19048e-07	Down-regulated
SDC2	Pig	1.21236e-11	-4.33161	6	66	4.43055e-07	Down-regulated
AFAP1L1	Pig	1.2999e-11	-1.53182	399	543	4.75047e-07	Down-regulated
SCARB1	Pig	1.54983e-11	-3.0093	98	249	5.66384e-07	Down-regulated
ADCY5	Pig	2.34172e-11	-7.77927	0	36	8.55783e-07	Down-regulated
ACTN2	Pig	2.34172e-11	-8.67506	0	36	8.55783e-07	Down-regulated
GRB14	Pig	2.34172e-11	-7.57521	0	36	8.55783e-07	Down-regulated
CYP27A1	Pig	2.34172e-11	-8.87389	0	36	8.55783e-07	Down-regulated
COL6A2	Pig	2.34172e-11	-8.11609	0	36	8.55783e-07	Down-regulated
PTGIS	Pig	2.52538e-11	-3.40587	42	157	9.229e-07	Down-regulated
TSEN2	Pig	3.09899e-11	-1.82623	273	426	1.13253e-06	Down-regulated
TRHDE	Pig	3.11351e-11	-5.9312	5	61	1.13783e-06	Down-regulated
SHMT1	Pig	3.82656e-11	-6.55158	1	41	1.39842e-06	Down-regulated
KCNMA1	Pig	3.82904e-11	-3.27221	5	61	1.39932e-06	Down-regulated
GAB2	Pig	4.64314e-11	-2.30775	169	325	1.69684e-06	Down-regulated
ENSSSCG00000027725	Pig	4.6593e-11	-4.42344	16	96	1.70274e-06	Down-regulated
ACER2	Pig	7.30503e-11	-2.57192	0.09	234	2.66962e-06	Down-regulated
ENSSSCG00000027046	Pig	7.64057e-11	-1.90977	91	239	2.79225e-06	Down-regulated
DLC1	Pig	8.23511e-11	-1.99768	408	523	3.00952e-06	Down-regulated
TNFRSF19	Pig	8.6739e-11	-3.61135	13	86	3.16988e-06	Down-regulated
GLUL	Pig	8.92211e-11	-4.15487	13	86	3.26059e-06	Down-regulated
EFHD1	Pig	9.08446e-11	-4.401	4	56	3.31991e-06	Down-regulated
FLVCR2	Pig	9.89944e-11	-4.25377	8	71	3.61775e-06	Down-regulated
ITIH5	Pig	1.30429e-10	-2.76189	31	132	4.76652e-06	Down-regulated
NLRC5	Pig	1.36764e-10	-1.83701	392	513	4.99805e-06	Down-regulated
EBF3	Pig	1.56448e-10	-1.78847	259	421	5.7174e-06	Down-regulated
AXL	Pig	2.30858e-10	-3.93954	3	51	8.43671e-06	Down-regulated
JDP2	Pig	3.61862e-10	-2.62884	97	234	1.32243e-05	Down-regulated
ANKS1A	Pig	4.06401e-10	-1.45141	484	584	1.48519e-05	Down-regulated
SLC22A15	Pig	4.39989e-10	-5.0476	2	46	1.60794e-05	Down-regulated
SMARCA1	Pig	5.44728e-10	-4.62025	5	56	1.99071e-05	Down-regulated
WNT5A	Pig	6.2119e-10	-7.98237	0	0.03	2.27014e-05	Down-regulated
FBN2	Pig	6.2119e-10	-7.73653	0	0.03	2.27014e-05	Down-regulated
SMTNL2	Pig	6.2119e-10	-7.53017	0	0.03	2.27014e-05	Down-regulated
TBX20	Pig	6.2119e-10	-7.45906	0	0.03	2.27014e-05	Down-regulated
C1QTNF7	Pig	7.54892e-10	-6.02724	2	41	2.75875e-05	Down-regulated
ABTB2	Pig	7.73361e-10	-5.19944	2	41	2.82625e-05	Down-regulated
ST3GAL2	Pig	8.95736e-10	-2.09646	242	396	3.27347e-05	Down-regulated
GPM6B	Pig	9.00578e-10	-4.51884	6	61	3.29116e-05	Down-regulated
PPFIBP2	Pig	9.48141e-10	-7.44111	1	36	3.46498e-05	Down-regulated
PDGFRB	Pig	9.73947e-10	-6.22181	1	36	3.55929e-05	Down-regulated
ENSSSCG00000017165	Pig	1.02763e-09	-2.83108	111	249	3.75549e-05	Down-regulated
CCDC170	Pig	1.05502e-09	-3.54961	11	76	3.85557e-05	Down-regulated
RAPGEF3	Pig	1.22476e-09	-2.27199	182	0.33	4.47589e-05	Down-regulated
PLA2G4A	Pig	1.53038e-09	-3.3929	26	112	5.59276e-05	Down-regulated
RHOQ	Pig	1.55395e-09	-3.64347	36	132	5.67892e-05	Down-regulated
SH3BP4	Pig	1.59445e-09	-2.53837	166	0.31	5.82691e-05	Down-regulated
HMCN1	Pig	1.77196e-09	-1.65219	522	0.64	6.47562e-05	Down-regulated
IFT140	Pig	1.9974e-09	-3.58024	36	132	7.29951e-05	Down-regulated
GPC6	Pig	2.02433e-09	-2.356	15	86	7.39792e-05	Down-regulated
NCALD	Pig	2.05024e-09	-1.52049	379	523	7.49259e-05	Down-regulated
PECAM1	Pig	2.10343e-09	-0.934237	851	848	7.68699e-05	Down-regulated
SETX	Pig	2.20881e-09	-1.33982	0.52	614	8.07209e-05	Down-regulated
EPHA3	Pig	2.73166e-09	-4.86994	6	56	9.98284e-05	Down-regulated
SLC37A1	Pig	2.86657e-09	-2.32007	0.05	157	0.000104759	Down-regulated
ARHGAP10	Pig	3.50331e-09	-2.27302	198	335	0.000128029	Down-regulated
GPM6A	Pig	3.73459e-09	-5.08763	16	86	0.000136481	Down-regulated
ENPP2	Pig	3.86439e-09	-4.6874	3	46	0.000141224	Down-regulated
ENSSSCG00000017164	Pig	4.13965e-09	-4.51215	9	66	0.000151283	Down-regulated
CBFA2T3	Pig	4.46317e-09	-3.46589	16	86	0.000163107	Down-regulated
ENSSSCG00000014280	Pig	4.68928e-09	-1.44014	458	553	0.00017137	Down-regulated
ADGRF5	Pig	5.26619e-09	-0.859877	823	807	0.000192453	Down-regulated
CPED1	Pig	5.33315e-09	-3.21887	25	107	0.0001949	Down-regulated
PLXNA4	Pig	6.04933e-09	-3.39239	14	81	0.000221073	Down-regulated
PGM5	Pig	6.94284e-09	-2.64964	74	193	0.000253726	Down-regulated
SRSF5	Pig	7.16843e-09	-1.73768	169	315	0.00026197	Down-regulated
PKD1	Pig	7.60723e-09	-2.87713	0.05	152	0.000278006	Down-regulated
GLT8D2	Pig	8.36684e-09	-4.36107	5	51	0.000305766	Down-regulated
SGCD	Pig	8.62105e-09	-5.14887	2	41	0.000315056	Down-regulated
SLC16A7	Pig	8.87333e-09	-5.20859	2	41	0.000324276	Down-regulated
MTUS2	Pig	8.92258e-09	-3.26432	38	132	0.000326076	Down-regulated
KLF15	Pig	9.06723e-09	-4.49041	2	41	0.000331362	Down-regulated
PRPSAP1	Pig	9.2399e-09	-2.42388	82	203	0.000337672	Down-regulated
CYP7B1	Pig	1.07229e-08	-3.07509	11	71	0.000391867	Down-regulated
DENND1B	Pig	1.07356e-08	-3.55184	19	91	0.000392333	Down-regulated
ACKR2	Pig	1.15399e-08	-3.42112	19	91	0.000421727	Down-regulated
PRDM11	Pig	1.1664e-08	-2.94923	36	127	0.000426261	Down-regulated
SNX30	Pig	1.29952e-08	-1.98869	177	0.32	0.000474909	Down-regulated
DOCK10	Pig	1.30581e-08	-3.89019	6	56	0.000477209	Down-regulated
NEGR1	Pig	1.40198e-08	-4.04142	22	96	0.000512354	Down-regulated
ADAMTS2	Pig	1.40903e-08	-2.66056	6	56	0.000514931	Down-regulated
FHL5	Pig	1.66175e-08	-7.52501	0	25	0.000607287	Down-regulated
MYH14	Pig	1.66175e-08	-7.26966	0	25	0.000607287	Down-regulated
ENSSSCG00000040109	Pig	1.66175e-08	-8.1725	0	25	0.000607287	Down-regulated
ZDBF2	Pig	1.66175e-08	-6.90573	0	25	0.000607287	Down-regulated
FAM110B	Pig	1.66175e-08	-6.77742	0	25	0.000607287	Down-regulated
VSIG4	Pig	1.66175e-08	-8.84998	0	25	0.000607287	Down-regulated
BMP5	Pig	1.66175e-08	-7.68684	0	25	0.000607287	Down-regulated
ENSSSCG00000010626	Pig	1.66175e-08	-8.31876	0	25	0.000607287	Down-regulated
CRY2	Pig	1.6645e-08	-2.67338	48	147	0.00060829	Down-regulated
TNNT2	Pig	1.67958e-08	-7.12185	2	36	0.000613802	Down-regulated
ANKRD11	Pig	1.81834e-08	-1.09402	483	574	0.000664514	Down-regulated
COL5A3	Pig	2.06396e-08	-3.32995	18	86	0.000754276	Down-regulated
MYL3	Pig	2.3712e-08	-7.41578	1	0.03	0.000866555	Down-regulated
IKZF2	Pig	2.3712e-08	-6.7782	1	0.03	0.000866555	Down-regulated
IRAG1	Pig	2.39209e-08	-5.98589	1	0.03	0.000874189	Down-regulated
IL17B	Pig	2.39209e-08	-6.18851	1	0.03	0.000874189	Down-regulated
TRPC6	Pig	2.39209e-08	-6.66835	1	0.03	0.000874189	Down-regulated
ENSSSCG00000001229	Pig	3.34935e-08	-0.674376	797	822	0.00122402	Down-regulated
UACA	Pig	3.70437e-08	-1.19911	532	589	0.00135376	Down-regulated
VAV2	Pig	3.89994e-08	-2.16473	196	0.33	0.00142523	Down-regulated
LGR4	Pig	4.05094e-08	-2.69876	35	122	0.00148042	Down-regulated
LSAMP	Pig	4.15193e-08	-3.67638	6	51	0.00151732	Down-regulated
IGSF3	Pig	4.17841e-08	-2.55257	53	152	0.001527	Down-regulated
SLC25A21	Pig	4.34575e-08	-4.53576	7	56	0.00158815	Down-regulated
ZNFX1	Pig	4.95759e-08	-1.754	0.3	426	0.00181175	Down-regulated
CLEC2B	Pig	5.16666e-08	-1.68531	252	396	0.00188816	Down-regulated
KANK3	Pig	7.04693e-08	-1.98253	202	0.33	0.0025753	Down-regulated
DNM1	Pig	7.06174e-08	-4.03558	3	41	0.00258071	Down-regulated
RASGRF2	Pig	7.23409e-08	-1.0194	484	589	0.0026437	Down-regulated
ZFY	Pig	8.19563e-08	-1.8129	71	183	0.00299509	Down-regulated
KLHL15	Pig	9.09572e-08	-2.27549	57	157	0.00332403	Down-regulated
ASAP2	Pig	1.0692e-07	-0.902802	659	706	0.00390739	Down-regulated
LRP5	Pig	1.07862e-07	-1.66564	152	284	0.00394181	Down-regulated
ENSSSCG00000032896	Pig	1.20555e-07	-4.85623	5	46	0.0044057	Down-regulated
IL6R	Pig	1.43871e-07	-4.09351	8	56	0.00525777	Down-regulated
NR4A3	Pig	1.76172e-07	-4.37037	2	36	0.00643819	Down-regulated
ADAMTSL3	Pig	2.06262e-07	-2.26755	73	178	0.00753786	Down-regulated
PLCB4	Pig	2.17073e-07	-0.50049	911	904	0.00793292	Down-regulated
ARGLU1	Pig	2.41622e-07	-0.866567	604	635	0.00883009	Down-regulated
NFIA	Pig	2.47204e-07	-1.06288	583	655	0.00903408	Down-regulated
KIF7	Pig	2.9034e-07	-2.97335	28	102	0.0106105	Down-regulated
PHYHD1	Pig	3.00735e-07	-3.33189	34	112	0.0109903	Down-regulated
GAREM1	Pig	3.05293e-07	-2.71093	26	96	0.0111569	Down-regulated
PNN	Pig	3.24176e-07	-1.63909	268	386	0.011847	Down-regulated
FHL1	Pig	3.62948e-07	-5.77816	2	0.03	0.0132639	Down-regulated
C6orf163	Pig	3.65689e-07	-5.93251	2	0.03	0.0133641	Down-regulated
FAM200A	Pig	3.76072e-07	-5.08303	4	41	0.0137435	Down-regulated
PRELP	Pig	3.79693e-07	-4.29649	2	0.03	0.0138759	Down-regulated
ADAMTS19	Pig	3.82791e-07	-4.39937	4	41	0.0139891	Down-regulated
SHTN1	Pig	3.85439e-07	-3.65351	2	0.03	0.0140859	Down-regulated
CCDC68	Pig	3.90601e-07	-2.04052	161	284	0.0142745	Down-regulated
GNA14	Pig	4.08464e-07	-5.38111	9	56	0.0149273	Down-regulated
CELF4	Pig	4.50747e-07	-7.48503	0	0.02	0.0164725	Down-regulated
MS4A7	Pig	4.50747e-07	-7.57748	0	0.02	0.0164725	Down-regulated
NLRP3	Pig	4.50747e-07	-7.48143	0	0.02	0.0164725	Down-regulated
ENSSSCG00000027903	Pig	4.50747e-07	-7.07327	0	0.02	0.0164725	Down-regulated
VSTM4	Pig	4.50747e-07	-7.52911	0	0.02	0.0164725	Down-regulated
OBSL1	Pig	4.50747e-07	-6.97184	0	0.02	0.0164725	Down-regulated
PPARGC1A	Pig	4.50747e-07	-6.95234	0	0.02	0.0164725	Down-regulated
TECRL	Pig	4.50747e-07	-7.33733	0	0.02	0.0164725	Down-regulated
ENSSSCG00000047274	Pig	4.50747e-07	-8.17848	0	0.02	0.0164725	Down-regulated
TEAD3	Pig	4.50747e-07	-6.67202	0	0.02	0.0164725	Down-regulated
ESRRG	Pig	4.50747e-07	-7.0939	0	0.02	0.0164725	Down-regulated
TRMT9B	Pig	4.50747e-07	-6.44836	0	0.02	0.0164725	Down-regulated
MYL7	Pig	4.50747e-07	-7.52131	0	0.02	0.0164725	Down-regulated
LZTS1	Pig	4.55543e-07	-3.45991	24	91	0.0166478	Down-regulated
LMBR1L	Pig	4.59914e-07	-2.84279	29	102	0.0168075	Down-regulated
SSPN	Pig	4.70616e-07	-3.065	17	76	0.0171987	Down-regulated
ARHGAP42	Pig	4.79677e-07	-3.13461	9	56	0.0175298	Down-regulated
LAPTM4B	Pig	4.81982e-07	-2.50721	0.04	122	0.017614	Down-regulated
HBB	Pig	4.84161e-07	-3.13333	17	76	0.0176937	Down-regulated
MPP6	Pig	5.08342e-07	-4.03409	6	46	0.0185773	Down-regulated
SSBP2	Pig	5.13165e-07	-1.37091	229	0.35	0.0187536	Down-regulated
DCLK1	Pig	5.19589e-07	-3.01494	57	147	0.0189884	Down-regulated
ENSSSCG00000034846	Pig	5.34135e-07	-3.39531	7	51	0.01952	Down-regulated
KMT2C	Human	5.39323e-07	-3.48161	7	51	0.0197096	Down-regulated
MAF	Pig	5.47224e-07	-3.8758	6	46	0.0199983	Down-regulated
SLIT3	Pig	5.84892e-07	-3.52146	13	66	0.0213749	Down-regulated
MYOM1	Pig	5.85646e-07	-6.62937	1	25	0.0214024	Down-regulated
MEDAG	Pig	5.90665e-07	-5.44085	1	25	0.0215859	Down-regulated
ENSSSCG00000043817	Pig	5.94651e-07	-1.62763	281	396	0.0217315	Down-regulated
F13A1	Pig	5.95726e-07	-5.81542	1	25	0.0217708	Down-regulated
TEX22	Pig	5.95726e-07	-4.89733	1	25	0.0217708	Down-regulated
TSPEAR	Pig	6.00828e-07	-4.88295	1	25	0.0219573	Down-regulated
PREX1	Pig	7.98654e-07	-3.15478	15	71	0.0291868	Down-regulated
NUAK1	Pig	8.34296e-07	-1.69603	281	396	0.0304894	Down-regulated
OSR1	Pig	8.44208e-07	-3.07427	0.03	102	0.0308516	Down-regulated
ALDH1A3	Pig	9.25036e-07	-3.7308	11	61	0.0338054	Down-regulated
WDR17	Pig	9.32055e-07	-2.55668	81	183	0.0340619	Down-regulated
MRC1	Pig	9.55636e-07	-3.00256	25	91	0.0349237	Down-regulated
HDAC10	Pig	1.04867e-06	-2.85339	22	86	0.0383236	Down-regulated
GRK7	Pig	1.08516e-06	-4.74995	3	36	0.0396574	Down-regulated
KCNQ1	Pig	1.08516e-06	-5.05028	3	36	0.0396574	Down-regulated
VIT	Pig	1.08516e-06	-4.59496	3	36	0.0396574	Down-regulated
GFPT2	Pig	1.09188e-06	-4.94483	3	36	0.0399029	Down-regulated
REV1	Pig	1.09779e-06	-2.2354	144	259	0.0401186	Down-regulated
MAP1A	Pig	1.11228e-06	-4.86524	3	36	0.0406483	Down-regulated
CDH18	Pig	1.13099e-06	-4.35802	0.01	56	0.041332	Down-regulated
PLCE1	Pig	1.13304e-06	-4.71908	3	36	0.041407	Down-regulated
RELN	Pig	1.19759e-06	-2.99034	3	36	0.043766	Down-regulated
LRFN5	Pig	1.28671e-06	-2.42646	63	157	0.0470228	Down-regulated
MEOX1	Pig	1.2897e-06	-2.58432	36	112	0.0471323	Down-regulated
COL27A1	Pig	1.30763e-06	-2.5854	0.01	56	0.0477872	Down-regulated

## Sheet: Endocardial lymphatic EC
gene	Species	p_val	avg_log2FC	pct. 1	pct.2	p_val_adj	level
ENSSSCG00000034570	Pig	2.18898e-16	4.73651	704	11	7.99963e-12	Up-regulated
DYSF	Pig	2.45906e-15	4.47454	741	33	8.98662e-11	Up-regulated
RSAD2	Pig	4.83688e-14	7.64798	593	11	1.76764e-09	Up-regulated
ENSSSCG00000032436	Pig	5.83684e-14	8.24665	556	0	2.13307e-09	Up-regulated
ISG15	Pig	7.43218e-14	5.30646	0.63	22	2.71609e-09	Up-regulated
MX1	Pig	4.46392e-13	7.05494	556	11	1.63134e-08	Up-regulated
MX2	Pig	1.25884e-12	4.36202	704	78	4.60043e-08	Up-regulated
ADGRL2	Pig	4.85823e-12	3.74222	815	167	1.77544e-07	Up-regulated
XPC	Pig	1.17714e-11	3.95521	0.63	44	4.30187e-07	Up-regulated
IFIT1	Pig	5.8314e-11	4.24517	556	33	2.13109e-06	Up-regulated
ITGA1	Pig	8.75635e-11	3.86406	704	122	3.20001e-06	Up-regulated
PCDH17	Pig	1.39344e-10	2.95561	667	78	5.09234e-06	Up-regulated
CALCRL	Pig	2.07941e-10	2.34079	926	0.4	7.59921e-06	Up-regulated
IFI44	Pig	3.4715e-10	3.72556	0.63	78	1.26866e-05	Up-regulated
MYLK	Pig	4.14212e-10	5.67297	444	11	1.51374e-05	Up-regulated
EPSTI1	Pig	5.27599e-10	3.47769	556	44	1.92811e-05	Up-regulated
ENSSSCG00000012006	Pig	6.04352e-10	4.54383	444	11	2.2086e-05	Up-regulated
ZMAT3	Pig	2.01202e-09	6.98985	0.37	0	7.35292e-05	Up-regulated
IGFBP5	Pig	2.0779e-09	4.24812	519	44	7.59369e-05	Up-regulated
DYNC1I1	Pig	3.02727e-09	3.86922	481	33	0.000110632	Up-regulated
PARP14	Pig	3.06168e-09	5.61822	407	11	0.000111889	Up-regulated
ENSSSCG00000016263	Pig	3.27431e-09	2.05992	852	333	0.00011966	Up-regulated
ENSSSCG00000014565	Pig	3.29926e-09	5.40759	407	11	0.000120571	Up-regulated
HIF1A	Pig	5.23026e-09	2.63954	741	167	0.00019114	Up-regulated
OAS2	Pig	6.65817e-09	2.19657	593	89	0.000243323	Up-regulated
ENSSSCG00000016687	Pig	7.06777e-09	3.13685	481	33	0.000258292	Up-regulated
MCC	Pig	7.94505e-09	3.13072	704	133	0.000290352	Up-regulated
ISG12(A)	Pig	9.28509e-09	2.46309	593	78	0.000339324	Up-regulated
LTBP1	Pig	9.53384e-09	2.67301	815	311	0.000348414	Up-regulated
PDGFD	Pig	9.65305e-09	3.50402	667	133	0.000352771	Up-regulated
EGLN3	Pig	1.48332e-08	7.73135	333	0	0.000542081	Up-regulated
DDX60	Pig	1.89196e-08	6.0072	0.37	11	0.000691416	Up-regulated
SMYD2	Pig	2.2562e-08	2.69584	519	56	0.000824527	Up-regulated
GJA1	Pig	2.73323e-08	4.85762	0.37	11	0.000998858	Up-regulated
MDM2	Pig	5.19838e-08	2.68148	704	222	0.00189975	Up-regulated
ENSSSCG00000005247	Pig	6.36292e-08	2.3112	741	167	0.00232533	Up-regulated
PALM2AKAP2	Pig	7.51243e-08	2.19383	889	544	0.00274542	Up-regulated
PTPRM	Pig	7.63659e-08	1.34961	1	867	0.00279079	Up-regulated
UBE2H	Pig	1.00718e-07	2.47688	815	0.3	0.00368072	Up-regulated
SLC7A11	Pig	1.064e-07	7.05592	296	0	0.00388838	Up-regulated
TSPAN12	Pig	1.14604e-07	3.89972	444	44	0.00418819	Up-regulated
EIF2AK2	Pig	1.2806e-07	2.40213	667	167	0.00467997	Up-regulated
PDGFC	Pig	1.32865e-07	3.49691	444	44	0.00485556	Up-regulated
ENSSSCG00000011729	Pig	1.67055e-07	2.11725	667	167	0.00610502	Up-regulated
THSD4	Pig	1.93106e-07	2.35905	778	344	0.00705704	Up-regulated
HERC5	Pig	2.06725e-07	3.19653	481	67	0.00755478	Up-regulated
ENSSSCG00000017754	Pig	2.09096e-07	2.94388	0.37	22	0.00764141	Up-regulated
ENSSSCG00000013889	Pig	2.6888e-07	2.91857	519	78	0.00982621	Up-regulated
KCNN3	Pig	3.72752e-07	3.13325	481	67	0.0136222	Up-regulated
OLA1	Pig	3.84119e-07	2.04513	556	89	0.0140376	Up-regulated
MSN	Pig	4.34687e-07	3.57432	0.63	156	0.0158856	Up-regulated
NFIB	Pig	6.42592e-07	1.73869	963	633	0.0234835	Up-regulated
TBL1XR1	Pig	6.99671e-07	2.27522	704	233	0.0255695	Up-regulated
MEF2A	Pig	7.43272e-07	1.20246	963	644	0.0271629	Up-regulated
PPP2R2A	Pig	8.65197e-07	2.26869	741	233	0.0316186	Up-regulated
DTX3L	Pig	9.0473e-07	3.2379	407	44	0.0330634	Up-regulated
UBB	Pig	1.0241e-06	2.5205	444	56	0.0374257	Up-regulated
IFIT5	Pig	1.03411e-06	3.47032	0.37	33	0.0377914	Up-regulated
RESF1	Pig	1.07475e-06	2.86493	481	78	0.0392769	Up-regulated
KCNB2	Pig	1.16554e-06	5.92887	333	22	0.0425947	Up-regulated
PPP1R13B	Pig	1.24031e-06	2.33675	667	189	0.045327	Up-regulated
SKAP2	Pig	1.28677e-06	2.40167	556	111	0.0470251	Up-regulated
SYCP2	Pig	1.32575e-06	4.60925	333	22	0.0484495	Up-regulated
NTN1	Pig	5.91296e-11	-3.47212	407	911	2.16089e-06	Down-regulated
TTN	Pig	1.67755e-08	-7.63174	0	678	0.00061306	Down-regulated
ABI3BP	Pig	8.01877e-08	-4.43629	111	0.7	0.00293046	Down-regulated
ENSSSCG00000005518	Pig	1.21004e-07	-2.29856	0.63	844	0.00442207	Down-regulated
SEMA6A	Pig	1.29621e-07	-1.50895	852	967	0.004737	Down-regulated
RORA	Pig	1.94544e-07	-2.33371	0.63	889	0.00710962	Down-regulated
OSBPL6	Pig	2.18161e-07	-2.01772	593	911	0.0079727	Down-regulated
CD55	Human	4.24223e-07	-7.51352	0	589	0.0155032	Down-regulated
DOCK9	Pig	4.74336e-07	-1.1537	926	967	0.0173346	Down-regulated
CHST9	Pig	9.6935e-07	-6.64086	37	589	0.0354249	Down-regulated
NOS1AP	Pig	1.19441e-06	-3.32594	333	711	0.0436496	Down-regulated
RADIL	Pig	1.32786e-06	-5.40677	74	0.6	0.0485266	Down-regulated
PARD6G	Pig	1.34943e-06	-1.74482	556	889	0.0493149	Down-regulated

## Sheet: FB
gene	Species	p_val	avg_log2FC	pct. 1	pct.2	p_val_adj	level
ROR1	Pig	0	5.31696	868	77	0	Up-regulated
NFKBIZ	Pig	0	4.3055	0.77	68	0	Up-regulated
RUNX1	Pig	0	5.09496	729	58	0	Up-regulated
MYO1D	Pig	0	4.28087	734	72	0	Up-regulated
ENSSSCG00000004830	Pig	0	4.37156	694	55	0	Up-regulated
CCND3	Pig	0	2.82307	821	184	0	Up-regulated
VMP1	Pig	0	3.37106	774	148	0	Up-regulated
HMCN1	Pig	0	2.99127	772	152	0	Up-regulated
COL8A1	Pig	0	3.29407	799	0.19	0	Up-regulated
FN1	Pig	0	3.54121	818	214	0	Up-regulated
OAS2	Pig	0	4.88354	627	28	0	Up-regulated
ETV6	Pig	0	3.19634	746	0.15	0	Up-regulated
ENSSSCG00000034570	Pig	0	6.55457	611	16	0	Up-regulated
RAI14	Pig	0	3.24805	708	129	0	Up-regulated
CDH11	Pig	0	2.46818	0.86	299	0	Up-regulated
GHSR	Pig	0	3.06216	669	109	0	Up-regulated
GPC6	Pig	0	2.31006	888	0.34	0	Up-regulated
MX2	Pig	0	6.56105	552	11	0	Up-regulated
PTPN13	Pig	0	2.06258	846	323	0	Up-regulated
ADAMTS6	Pig	0	6.24383	533	26	0	Up-regulated
PDE4B	Pig	0	6.57461	521	17	0	Up-regulated
RSAD2	Pig	0	8.81551	491	2	0	Up-regulated
ENSSSCG00000016629	Pig	4.83926e-300	3.01155	684	156	1.76851e-295	Up-regulated
TNC	Pig	3.00849e-298	8.4648	474	3	1.09945e-293	Up-regulated
MX1	Pig	7.48557e-298	4.02645	535	33	2.7356e-293	Up-regulated
RUNX2	Pig	2.76233e-296	4.73021	526	31	1.00949e-291	Up-regulated
SFRP1	Pig	2.79743e-288	3.43407	554	49	1.02232e-283	Up-regulated
ADAM12	Pig	1.16825e-285	3.22723	655	132	4.26938e-281	Up-regulated
MAGI1	Pig	5.9596e-282	2.58461	654	119	2.17793e-277	Up-regulated
PRR16	Pig	2.12027e-280	5.30431	493	28	7.74853e-276	Up-regulated
PEAK1	Pig	5.02414e-280	2.04712	833	362	1.83607e-275	Up-regulated
CAST	Pig	2.97214e-278	3.77845	541	56	1.08617e-273	Up-regulated
GBE1	Pig	2.16754e-275	2.79962	702	214	7.92127e-271	Up-regulated
COL12A1	Pig	1.12429e-274	2.80286	693	183	4.10872e-270	Up-regulated
TENM3	Pig	1.81924e-271	2.14496	776	277	6.64843e-267	Up-regulated
GALK2	Pig	2.58492e-267	2.76261	639	126	9.44658e-263	Up-regulated
USP18	Pig	5.79752e-267	4.12046	482	26	2.1187e-262	Up-regulated
JAK2	Pig	6.36852e-266	2.41644	734	226	2.32737e-261	Up-regulated
TPM1	Pig	1.72813e-262	4.78231	479	31	6.31544e-258	Up-regulated
FSTL1	Pig	2.18716e-261	2.23679	0.74	238	7.99299e-257	Up-regulated
IFI44L	Pig	8.17617e-258	2.62832	593	103	2.98798e-253	Up-regulated
ENSSSCG00000017146	Pig	7.61671e-250	2.70305	592	104	2.78353e-245	Up-regulated
EIF2AK2	Pig	1.2142e-249	2.48955	579	95	4.43729e-245	Up-regulated
CALD1	Pig	1.82299e-249	1.6563	916	0.6	6.66211e-245	Up-regulated
ENSSSCG00000016263	Pig	2.08404e-247	6.40747	418	9	7.61612e-243	Up-regulated
SETX	Pig	3.77632e-240	2.242	664	164	1.38006e-235	Up-regulated
CARMIL1	Pig	5.41263e-239	3.02444	518	63	1.97805e-234	Up-regulated
HERC6	Pig	1.67854e-236	3.26843	501	61	6.13421e-232	Up-regulated
ROR2	Pig	1.1371e-235	5.68815	413	13	4.15555e-231	Up-regulated
SEC24D	Pig	4.94354e-235	2.1939	683	192	1.80662e-230	Up-regulated
MSRB3	Pig	1.57154e-234	3.87503	472	48	5.74319e-230	Up-regulated
AAK1	Pig	2.06609e-233	2.01475	0.7	0.22	7.55051e-229	Up-regulated
EPHA7	Pig	2.61251e-233	13.0689	382	0	9.5474e-229	Up-regulated
COMMD6	Pig	3.0392e-232	2.65597	588	124	1.11067e-227	Up-regulated
ISG12(A)	Pig	2.32363e-229	3.92026	421	18	8.49171e-225	Up-regulated
ITPR1	Pig	1.25812e-227	2.21671	641	0.16	4.5978e-223	Up-regulated
PLOD2	Pig	2.24564e-227	1.98287	813	377	8.20667e-223	Up-regulated
MAMDC2	Pig	4.68584e-227	3.67997	446	34	1.71244e-222	Up-regulated
IGF1	Pig	1.49699e-226	3.17359	518	77	5.47076e-222	Up-regulated
SLC38A2	Pig	1.81656e-225	3.82463	456	43	6.63861e-221	Up-regulated
HERC5	Pig	1.08488e-224	3.69117	426	25	3.96468e-220	Up-regulated
MGMT	Pig	1.37069e-222	2.54319	602	0.14	5.00918e-218	Up-regulated
STK38L	Pig	1.57143e-220	6.85648	379	7	5.7428e-216	Up-regulated
ATP2A2	Pig	7.0155e-219	4.32195	407	21	2.56382e-214	Up-regulated
SLCO3A1	Pig	1.09018e-216	3.25454	493	72	3.98405e-212	Up-regulated
GAREM1	Pig	1.7952e-216	2.94039	516	86	6.56057e-212	Up-regulated
MEF2A	Pig	4.66448e-216	1.90862	689	224	1.70463e-211	Up-regulated
STAT1	Pig	1.77292e-215	2.15022	591	0.13	6.47915e-211	Up-regulated
MYO1E	Pig	1.39223e-213	4.36097	412	28	5.0879e-209	Up-regulated
PRICKLE1	Pig	1.82778e-213	2.21462	613	147	6.67964e-209	Up-regulated
CLU	Pig	4.35793e-212	9.01113	356	2	1.5926e-207	Up-regulated
CCDC141	Pig	8.05762e-211	3.3874	476	68	2.94466e-206	Up-regulated
IFIT1	Pig	1.35397e-209	4.14043	391	18	4.94807e-205	Up-regulated
RASAL2	Pig	6.11028e-209	1.83384	688	209	2.233e-204	Up-regulated
ATP13A3	Pig	1.16986e-208	3.62127	455	58	4.27525e-204	Up-regulated
BST2	Pig	1.74052e-208	8.88427	0.35	1	6.36071e-204	Up-regulated
CADPS2	Pig	2.19052e-207	3.12912	467	57	8.00526e-203	Up-regulated
PRKN	Pig	2.0663e-204	1.94051	655	195	7.55128e-200	Up-regulated
ZSWIM6	Pig	2.75924e-199	2.05016	644	208	1.00836e-194	Up-regulated
MYO1B	Pig	5.91785e-197	2.54659	0.51	92	2.16268e-192	Up-regulated
ZBTB7C	Pig	3.79002e-196	4.7193	371	19	1.38506e-191	Up-regulated
CCN4	Pig	1.97407e-194	6.9045	333	3	7.21422e-190	Up-regulated
NKAIN3	Pig	1.56408e-192	4.72923	365	19	5.71592e-188	Up-regulated
PAPPA	Pig	1.46027e-191	1.96562	696	265	5.33654e-187	Up-regulated
EFNA5	Pig	1.82236e-191	2.37412	0.55	0.13	6.6598e-187	Up-regulated
RASA1	Pig	3.25712e-191	2.31611	574	152	1.19031e-186	Up-regulated
YPEL2	Pig	1.6497e-189	3.70658	414	47	6.02884e-185	Up-regulated
SRPK2	Pig	1.9947e-188	1.78849	656	206	7.28963e-184	Up-regulated
MDFIC	Pig	9.90699e-186	2.16528	478	78	3.62051e-181	Up-regulated
EPSTI1	Pig	8.69416e-185	3.47439	365	22	3.17728e-180	Up-regulated
IGFBP7	Pig	2.64382e-182	2.33396	556	141	9.66183e-178	Up-regulated
CBLB	Pig	3.56421e-181	1.7644	0.75	352	1.30254e-176	Up-regulated
SYCP2	Pig	7.84189e-180	3.4344	395	41	2.86582e-175	Up-regulated
GPC4	Pig	3.98513e-179	2.93259	412	49	1.45637e-174	Up-regulated
CCDC80	Pig	4.12548e-179	2.12608	532	121	1.50766e-174	Up-regulated
NAV3	Pig	6.93794e-178	3.94102	375	35	2.53547e-173	Up-regulated
FBXO39	Pig	4.64141e-177	2.90237	384	35	1.6962e-172	Up-regulated
IFI44	Pig	3.60212e-176	2.39073	423	55	1.3164e-171	Up-regulated
TLN2	Pig	1.03596e-174	1.96144	637	235	3.78592e-170	Up-regulated
RAD51B	Pig	8.58583e-173	1.6535	0.63	195	3.13769e-168	Up-regulated
ADAMTS3	Pig	1.67034e-171	7.43348	301	3	6.10427e-167	Up-regulated
PDGFC	Pig	1.17068e-170	8.68495	295	1	4.27826e-166	Up-regulated
ADK	Pig	3.82226e-170	3.32339	0.4	54	1.39684e-165	Up-regulated
GAB1	Pig	1.87871e-169	2.9432	429	72	6.86576e-165	Up-regulated
TIMP1	Pig	4.69055e-167	3.51476	333	19	1.71416e-162	Up-regulated
CMSS1	Pig	7.02936e-167	2.05056	586	185	2.56888e-162	Up-regulated
VCL	Pig	8.41296e-166	2.47673	0.5	123	3.07452e-161	Up-regulated
PLS3	Pig	2.44778e-165	2.50939	453	85	8.94542e-161	Up-regulated
ADAMTS9	Pig	3.73922e-165	2.94165	425	73	1.3665e-160	Up-regulated
IFIH1	Pig	4.12612e-163	2.73571	371	0.04	1.50789e-158	Up-regulated
SLC39A14	Pig	5.35567e-163	1.81282	587	183	1.95723e-158	Up-regulated
KCNMA1	Pig	1.3728e-162	4.79655	317	17	5.01688e-158	Up-regulated
ZC3H12C	Pig	1.83885e-162	4.03251	364	42	6.72008e-158	Up-regulated
CCN2	Pig	3.98107e-162	2.83815	359	35	1.45488e-157	Up-regulated
ERG	Pig	6.5986e-161	5.10957	306	13	2.41146e-156	Up-regulated
UBE2E2	Pig	1.59634e-158	1.30476	763	367	5.83384e-154	Up-regulated
SERPINE1	Pig	4.6981e-158	3.63257	336	27	1.71692e-153	Up-regulated
UBE2H	Pig	8.86647e-158	1.84917	613	222	3.24025e-153	Up-regulated
FARP1	Pig	2.22011e-157	1.4158	736	316	8.11338e-153	Up-regulated
OSBPL6	Pig	2.23938e-157	1.9059	497	116	8.18382e-153	Up-regulated
PAM	Pig	3.84591e-157	1.51075	794	499	1.40549e-152	Up-regulated
TBL1XR1	Pig	5.34254e-157	1.48591	692	294	1.95243e-152	Up-regulated
ACVR2A	Pig	9.57132e-157	2.58634	441	87	3.49784e-152	Up-regulated
GPM6B	Pig	4.57468e-156	1.75499	579	187	1.67182e-151	Up-regulated
ASCC3	Pig	3.60749e-155	1.58003	592	183	1.31836e-150	Up-regulated
PARP12	Pig	2.14835e-154	2.65442	372	47	7.85116e-150	Up-regulated
UGP2	Pig	3.92416e-154	2.26847	468	104	1.43408e-149	Up-regulated
RAB31	Pig	1.22184e-153	1.95494	529	0.14	4.46521e-149	Up-regulated
LRRFIP2	Pig	1.49397e-153	3.17615	349	38	5.45973e-149	Up-regulated
PALLD	Pig	2.60015e-153	3.13158	415	81	9.50223e-149	Up-regulated
AKAP6	Pig	1.85319e-152	4.64231	0.29	11	6.77249e-148	Up-regulated
CHST11	Pig	6.86978e-152	3.44987	335	32	2.51056e-147	Up-regulated
TANC1	Pig	2.32809e-151	5.95831	274	5	8.508e-147	Up-regulated
DDX60	Pig	4.07938e-151	5.23176	275	5	1.49081e-146	Up-regulated
PDLIM5	Pig	2.09493e-150	3.56093	318	25	7.65593e-146	Up-regulated
FBXW7	Pig	4.22664e-149	2.01324	476	116	1.54463e-144	Up-regulated
RCAN1	Pig	7.8822e-149	4.44914	307	22	2.88055e-144	Up-regulated
FIGN	Pig	2.89698e-148	2.56993	373	51	1.0587e-143	Up-regulated
SMIM14	Pig	8.7659e-148	1.62417	544	155	3.2035e-143	Up-regulated
POSTN	Pig	1.69658e-147	4.16526	323	0.03	6.20014e-143	Up-regulated
TRIM22	Pig	1.07278e-145	4.40215	288	14	3.92047e-141	Up-regulated
FAM214A	Pig	2.98728e-145	1.78345	568	195	1.0917e-140	Up-regulated
CCDC91	Pig	8.14554e-145	2.22881	0.44	97	2.97679e-140	Up-regulated
ST3GAL6	Pig	2.02774e-144	1.97881	434	87	7.41038e-140	Up-regulated
ENSSSCG00000010893	Pig	6.20159e-144	1.75638	556	179	2.26637e-139	Up-regulated
FAM78B	Pig	1.49494e-143	4.69716	303	25	5.46326e-139	Up-regulated
NCAM1	Pig	4.55613e-143	3.03255	381	67	1.66504e-138	Up-regulated
SMYD3	Pig	1.74173e-142	1.27732	671	265	6.36516e-138	Up-regulated
RESF1	Pig	3.19318e-142	4.2868	307	27	1.16695e-137	Up-regulated
FBXO42	Pig	3.2135e-142	2.00967	519	0.15	1.17437e-137	Up-regulated
NBAS	Pig	5.87086e-142	1.85457	508	137	2.1455e-137	Up-regulated
ENSSSCG00000038187	Pig	5.95943e-142	2.46519	386	64	2.17787e-137	Up-regulated
DNAJC13	Pig	6.81957e-142	1.91543	528	158	2.49221e-137	Up-regulated
BNC2	Pig	2.72779e-141	0.966512	915	668	9.96872e-137	Up-regulated
TJP1	Pig	3.025e-141	2.1513	462	119	1.10549e-136	Up-regulated
PARP14	Pig	3.20252e-141	4.42579	267	8	1.17036e-136	Up-regulated
ME1	Pig	5.27785e-141	5.43151	265	8	1.92879e-136	Up-regulated
ERC1	Pig	2.05939e-140	1.27555	769	393	7.52606e-136	Up-regulated
ISG15	Pig	3.21321e-140	5.41269	259	5	1.17427e-135	Up-regulated
HSP90AA1	Pig	6.95361e-140	2.97841	349	48	2.5412e-135	Up-regulated
PHTF2	Pig	7.16448e-140	3.86774	306	27	2.61826e-135	Up-regulated
ST8SIA1	Pig	8.0314e-140	3.26578	305	25	2.93507e-135	Up-regulated
MYLK	Pig	9.40668e-140	3.07687	354	53	3.43767e-135	Up-regulated
MYOF	Pig	1.45962e-139	2.17841	395	71	5.33419e-135	Up-regulated
ENSSSCG00000027725	Pig	2.26098e-139	3.59426	313	32	8.26275e-135	Up-regulated
CPEB3	Pig	4.14534e-139	5.36862	262	8	1.51492e-134	Up-regulated
CD109	Pig	1.21296e-137	2.32841	354	49	4.43276e-133	Up-regulated
MACF1	Pig	1.66247e-137	1.24253	736	0.35	6.07548e-133	Up-regulated
SLC40A1	Pig	2.35131e-136	2.02389	508	159	8.59286e-132	Up-regulated
SAMD9	Pig	2.25762e-135	4.8341	259	8	8.25046e-131	Up-regulated
ARHGAP42	Pig	3.89713e-135	2.16004	509	162	1.42421e-130	Up-regulated
SLC44A1	Pig	1.18312e-134	1.37695	0.56	179	4.32371e-130	Up-regulated
TMEM45A	Pig	3.31734e-134	2.55018	0.32	35	1.21232e-129	Up-regulated
MYO5A	Pig	8.43361e-134	1.91785	468	125	3.08206e-129	Up-regulated
LRRFIP1	Pig	1.27136e-133	1.54466	659	286	4.6462e-129	Up-regulated
FGF2	Pig	1.93046e-133	1.75562	598	234	7.05487e-129	Up-regulated
YAP1	Pig	2.48611e-133	1.56047	594	219	9.08548e-129	Up-regulated
USP15	Pig	3.7324e-133	1.94645	479	133	1.364e-128	Up-regulated
ENSSSCG00000014997	Pig	6.75231e-132	2.95654	318	37	2.46763e-127	Up-regulated
COX2	Pig	1.13753e-131	2.0107	491	141	4.15711e-127	Up-regulated
CPM	Pig	2.25382e-131	2.32533	404	87	8.2366e-127	Up-regulated
LGALS3BP	Pig	1.49613e-130	5.86033	241	5	5.4676e-126	Up-regulated
FBXL20	Pig	1.53747e-130	1.7205	563	197	5.6187e-126	Up-regulated
CTNNA1	Pig	2.47732e-130	1.5079	596	241	9.05336e-126	Up-regulated
CYP1B1	Pig	3.67409e-130	2.07122	372	66	1.3427e-125	Up-regulated
THBS4	Pig	4.88934e-130	2.21124	446	119	1.78681e-125	Up-regulated
HTRA1	Pig	2.73361e-129	1.35887	548	174	9.98999e-125	Up-regulated
KAT6B	Pig	2.79906e-129	1.6075	548	192	1.02292e-124	Up-regulated
RHOBTB3	Pig	6.03756e-129	3.00672	0.33	47	2.20643e-124	Up-regulated
CHSY3	Pig	7.09484e-129	1.40567	0.6	229	2.59281e-124	Up-regulated
JADE1	Pig	1.04964e-128	4.44265	267	17	3.83592e-124	Up-regulated
NCOA3	Pig	8.86405e-128	1.98347	408	0.09	3.23937e-123	Up-regulated
B2M	Pig	1.05352e-127	1.57138	466	122	3.8501e-123	Up-regulated
SLC41A2	Pig	2.42554e-126	2.64352	0.29	27	8.86415e-122	Up-regulated
NEDD9	Pig	2.53874e-126	4.21964	269	0.02	9.27784e-122	Up-regulated
ENAH	Pig	3.23207e-126	3.40443	307	39	1.18116e-121	Up-regulated
PLEKHA6	Pig	3.77047e-126	3.64642	296	33	1.37792e-121	Up-regulated
SCFD2	Pig	7.68062e-126	1.23941	632	232	2.80688e-121	Up-regulated
PKM	Pig	8.39524e-126	6.74096	228	3	3.06804e-121	Up-regulated
PXK	Pig	1.18069e-125	2.10236	406	91	4.31484e-121	Up-regulated
CHN1	Pig	1.2298e-125	11.5239	222	0	4.49429e-121	Up-regulated
SDCBP	Pig	1.54319e-125	2.80815	321	44	5.6396e-121	Up-regulated
ZNFX1	Pig	2.07339e-125	2.29324	338	52	7.57722e-121	Up-regulated
CCDC6	Pig	2.74242e-125	3.56606	283	28	1.00222e-120	Up-regulated
ZMAT3	Pig	5.01846e-125	7.11876	226	2	1.834e-120	Up-regulated
SLC20A2	Pig	8.14673e-125	5.60785	234	6	2.97722e-120	Up-regulated
FOXP1	Pig	2.50175e-124	1.02505	825	527	9.14264e-120	Up-regulated
ANXA5	Pig	5.07529e-124	1.30467	542	177	1.85476e-119	Up-regulated
DCAF6	Pig	8.43221e-124	1.54953	521	178	3.08155e-119	Up-regulated
GSK3B	Pig	9.55163e-124	1.26046	704	0.34	3.49064e-119	Up-regulated
ENSSSCG00000008137	Pig	1.31699e-123	1.96357	417	99	4.81294e-119	Up-regulated
IL4R	Pig	1.68413e-123	9.11076	0.22	1	6.15465e-119	Up-regulated
REXO2	Pig	1.50498e-122	1.17397	623	239	5.49995e-118	Up-regulated
ENSSSCG00000001229	Pig	1.13084e-121	1.88299	392	86	4.13265e-117	Up-regulated
AHR	Pig	1.53829e-121	5.34975	236	9	5.62169e-117	Up-regulated
KLHL24	Pig	1.89507e-121	2.51541	349	66	6.92552e-117	Up-regulated
RAB3GAP1	Pig	3.64354e-121	4.11274	255	17	1.33153e-116	Up-regulated
P4HA1	Pig	3.94699e-121	1.45335	528	177	1.44243e-116	Up-regulated
HIVEP2	Pig	6.68275e-121	1.44282	617	264	2.44221e-116	Up-regulated
ROBO1	Pig	7.71039e-120	1.2189	626	0.26	2.81776e-115	Up-regulated
ENSSSCG00000022128	Pig	3.75947e-119	3.21305	298	0.04	1.3739e-114	Up-regulated
PCMTD1	Pig	5.35978e-119	1.9109	0.43	116	1.95873e-114	Up-regulated
MYCBP2	Pig	1.91161e-118	1.24927	709	0.35	6.98599e-114	Up-regulated
MBNL1	Pig	2.61466e-118	1.01421	793	479	9.55529e-114	Up-regulated
OGDH	Pig	2.78628e-117	3.73798	259	22	1.01825e-112	Up-regulated
HRH1	Pig	3.84265e-117	5.30886	228	8	1.4043e-112	Up-regulated
MAP4	Pig	3.94849e-117	1.42381	575	234	1.44298e-112	Up-regulated
GPSM2	Pig	4.7806e-117	2.32065	337	0.06	1.74707e-112	Up-regulated
CREB3L2	Pig	4.63502e-116	1.07918	632	249	1.69387e-111	Up-regulated
PKDCC	Pig	5.39497e-116	3.78379	265	25	1.97159e-111	Up-regulated
LCLAT1	Pig	6.98772e-116	3.44888	265	26	2.55366e-111	Up-regulated
TENT5A	Pig	2.4129e-115	3.33997	287	37	8.81793e-111	Up-regulated
OSBPL9	Pig	2.4561e-115	1.62493	532	197	8.97582e-111	Up-regulated
ENSSSCG00000035751	Pig	3.00338e-115	9.08129	206	0	1.09758e-110	Up-regulated
TBC1D32	Pig	7.30103e-115	2.63974	316	51	2.66816e-110	Up-regulated
EXOC4	Pig	7.45183e-115	0.886225	864	593	2.72327e-110	Up-regulated
CLIC4	Pig	7.811e-115	1.40574	517	174	2.85453e-110	Up-regulated
ARAP2	Pig	1.56084e-114	2.67531	284	34	5.7041e-110	Up-regulated
ATP2B4	Pig	1.77945e-114	3.20103	273	31	6.50299e-110	Up-regulated
CD44	Pig	2.18117e-114	2.49164	334	62	7.9711e-110	Up-regulated
MFHAS1	Pig	4.2961e-114	2.54652	334	62	1.57001e-109	Up-regulated
HOMER1	Pig	5.64113e-114	11.6307	203	0	2.06155e-109	Up-regulated
CSGALNACT2	Pig	1.25536e-113	3.39305	267	28	4.58771e-109	Up-regulated
CSNK1G1	Pig	3.49374e-113	1.55161	481	148	1.27679e-108	Up-regulated
CMPK2	Pig	7.24968e-113	5.13449	214	5	2.64939e-108	Up-regulated
XPC	Pig	5.13795e-112	2.39937	308	47	1.87766e-107	Up-regulated
VCAN	Pig	7.94141e-112	1.02256	773	428	2.90219e-107	Up-regulated
GLG1	Pig	1.46521e-111	1.2377	638	274	5.3546e-107	Up-regulated
DNAJB4	Pig	1.94163e-111	2.07824	366	84	7.09568e-107	Up-regulated
ENSSSCG00000016687	Pig	1.96093e-111	6.57839	203	2	7.16621e-107	Up-regulated
SPATA5	Pig	2.50886e-111	1.6317	442	128	9.16861e-107	Up-regulated
ENSSSCG00000004441	Pig	3.06154e-111	1.25305	484	0.15	1.11884e-106	Up-regulated
NFAT5	Pig	3.25229e-111	1.18161	0.63	0.28	1.18855e-106	Up-regulated
STRN	Pig	4.77195e-111	3.77921	243	19	1.74391e-106	Up-regulated
SERPINH1	Pig	4.81634e-111	1.83493	324	56	1.76013e-106	Up-regulated
SIPA1L1	Pig	3.31652e-110	1.19373	524	182	1.21202e-105	Up-regulated
ENSSSCG00000033262	Pig	5.05695e-110	1.66538	368	81	1.84806e-105	Up-regulated
LGALS1	Pig	7.23508e-110	2.42188	261	26	2.64406e-105	Up-regulated
C1orf198	Pig	4.30993e-109	7.74023	0.2	2	1.57507e-104	Up-regulated
PLCE1	Pig	5.00099e-109	1.98123	319	56	1.82761e-104	Up-regulated
USP24	Pig	8.96054e-109	1.31578	547	0.21	3.27463e-104	Up-regulated
KDM4C	Pig	9.5129e-109	1.49825	475	153	3.47649e-104	Up-regulated
BCAT1	Pig	1.00671e-108	5.63375	205	4	3.67904e-104	Up-regulated
ZMYND8	Pig	1.43845e-108	2.21658	345	73	5.2568e-104	Up-regulated
NEK7	Pig	2.48356e-108	1.47085	519	188	9.07616e-104	Up-regulated
DDX5	Pig	6.98028e-108	1.28126	603	263	2.55094e-103	Up-regulated
PPIP5K2	Pig	1.00563e-107	2.34582	307	53	3.67507e-103	Up-regulated
ENSSSCG00000004578	Pig	1.35696e-107	1.23145	459	138	4.959e-103	Up-regulated
LNPEP	Pig	2.45219e-107	4.89203	209	7	8.96153e-103	Up-regulated
FBXO34	Pig	2.50404e-107	2.00812	356	77	9.151e-103	Up-regulated
BACH1	Pig	4.05904e-107	2.42075	319	59	1.48338e-102	Up-regulated
IQGAP1	Pig	4.36157e-107	1.62484	463	152	1.59394e-102	Up-regulated
S100A6	Pig	4.86815e-107	3.2443	231	16	1.77907e-102	Up-regulated
ELL2	Pig	1.842e-106	5.12503	215	0.01	6.73159e-102	Up-regulated
SLC25A12	Pig	1.8654e-106	4.94536	0.21	8	6.81711e-102	Up-regulated
COG3	Pig	8.277e-106	2.20597	321	62	3.02483e-101	Up-regulated
UBE2L6	Pig	1.57338e-105	4.37276	208	7	5.74992e-101	Up-regulated
ENO1	Pig	3.99044e-105	2.26494	338	71	1.4583e-100	Up-regulated
MEOX1	Pig	1.25681e-104	5.40899	199	4	4.59302e-100	Up-regulated
HGF	Pig	1.61374e-104	5.35723	204	7	5.89742e-100	Up-regulated
ACVR1	Pig	2.22676e-104	1.70651	0.46	154	8.13769e-100	Up-regulated
PARP8	Pig	7.73647e-104	1.14819	604	256	2.82729e-99	Up-regulated
SDCCAG8	Pig	1.66286e-103	2.79964	282	44	6.07691e-99	Up-regulated
TUSC3	Pig	2.11375e-103	4.79063	206	8	7.7247e-99	Up-regulated
SPATS2	Pig	2.65599e-103	2.28648	308	56	9.70632e-99	Up-regulated
ISM1	Pig	3.39726e-103	2.21721	415	132	1.24153e-98	Up-regulated
ENSSSCG00000032436	Pig	4.45647e-103	5.4169	193	3	1.62862e-98	Up-regulated
STK17B	Pig	6.85519e-103	3.25311	0.24	23	2.50523e-98	Up-regulated
HSPA8	Pig	8.59645e-103	4.44577	212	11	3.14157e-98	Up-regulated
RRBP1	Pig	3.29278e-102	1.0575	593	242	1.20335e-97	Up-regulated
ATF7IP	Pig	7.083e-102	1.65541	431	133	2.58848e-97	Up-regulated
ENSSSCG00000000530	Pig	7.1223e-102	1.80467	389	107	2.60284e-97	Up-regulated
ZBP1	Pig	1.27064e-101	5.30274	198	6	4.64354e-97	Up-regulated
RNLS	Pig	1.53818e-101	1.92223	326	67	5.62129e-97	Up-regulated
THBS2	Pig	1.82595e-101	2.23506	278	41	6.67294e-97	Up-regulated
SOCS5	Pig	2.04491e-101	1.70277	459	155	7.47311e-97	Up-regulated
MRTFA	Pig	4.15124e-101	1.15996	0.54	206	1.51707e-96	Up-regulated
ENSSSCG00000013889	Pig	4.28838e-101	2.54709	253	29	1.56719e-96	Up-regulated
NRP2	Pig	6.07249e-101	3.51648	216	13	2.21919e-96	Up-regulated
SND1	Pig	9.09814e-101	0.929975	592	236	3.32492e-96	Up-regulated
WWTR1	Pig	9.50821e-101	1.50046	515	193	3.47478e-96	Up-regulated
OLA1	Pig	3.02048e-100	1.7568	332	69	1.10384e-95	Up-regulated
GLT8D2	Pig	3.831e-100	1.28755	435	135	1.40004e-95	Up-regulated
ENSSSCG00000035904	Pig	4.11012e-100	1.97713	327	68	1.50204e-95	Up-regulated
SERPINE2	Pig	4.91995e-100	1.85793	372	96	1.79799e-95	Up-regulated
ENSSSCG00000032942	Pig	6.2444e-100	1.77017	352	81	2.28201e-95	Up-regulated
TMEM65	Pig	8.65055e-100	2.30712	319	68	3.16134e-95	Up-regulated
ANKS1A	Pig	1.30408e-99	3.0678	245	28	4.76577e-95	Up-regulated
R3HDM1	Pig	1.34195e-99	1.55747	403	117	4.90415e-95	Up-regulated
CEMIP2	Pig	2.91542e-99	1.73002	337	74	1.06544e-94	Up-regulated
USP25	Pig	4.19587e-99	1.12163	628	295	1.53338e-94	Up-regulated
SPARC	Pig	6.05358e-99	0.913965	611	263	2.21228e-94	Up-regulated
PML	Pig	1.50185e-98	1.84209	325	68	5.4885e-94	Up-regulated
GUCY1A1	Pig	6.6058e-98	2.24192	264	37	2.41409e-93	Up-regulated
INSR	Pig	6.71708e-98	2.81167	288	54	2.45476e-93	Up-regulated
RBMS1	Pig	9.76363e-98	0.878711	814	495	3.56812e-93	Up-regulated
ADD3	Pig	1.18742e-97	1.01535	731	394	4.33944e-93	Up-regulated
MPDZ	Pig	1.22086e-97	1.33914	501	189	4.46162e-93	Up-regulated
CFAP94	Pig	1.79588e-97	1.13463	443	137	6.56304e-93	Up-regulated
CCN1	Pig	2.36876e-97	3.44204	231	23	8.65664e-93	Up-regulated
NLK	Pig	3.84841e-97	2.33117	288	52	1.4064e-92	Up-regulated
TBC1D1	Pig	8.07611e-97	4.39657	0.19	6	2.95142e-92	Up-regulated
UBASH3B	Pig	8.76388e-97	3.84762	222	0.02	3.20276e-92	Up-regulated
UBAC2	Pig	1.23798e-96	2.45755	264	0.04	4.52421e-92	Up-regulated
TRPM7	Pig	1.30039e-96	1.10004	0.61	284	4.75228e-92	Up-regulated
ENSSSCG00000000145	Pig	1.6917e-96	2.01164	0.35	87	6.1823e-92	Up-regulated
FAP	Pig	2.40909e-96	1.07206	549	222	8.80403e-92	Up-regulated
DZIP1L	Pig	2.77284e-96	3.5306	222	0.02	1.01333e-91	Up-regulated
IL1R1	Pig	4.72583e-96	0.981127	631	287	1.72705e-91	Up-regulated
NPTN	Pig	5.52876e-96	1.98968	0.31	65	2.02049e-91	Up-regulated
ABTB2	Pig	9.10056e-96	3.37895	231	25	3.3258e-91	Up-regulated
CILP	Pig	2.79898e-95	3.76318	203	12	1.02289e-90	Up-regulated
ITGAV	Pig	3.00501e-95	1.48466	384	105	1.09818e-90	Up-regulated
ZC3HAV1	Pig	3.74391e-95	1.96654	318	68	1.36821e-90	Up-regulated
ARID5B	Pig	4.9935e-95	1.17969	592	265	1.82487e-90	Up-regulated
PDGFD	Pig	5.22209e-95	1.05562	692	0.37	1.90841e-90	Up-regulated
SPTAN1	Pig	1.05226e-94	3.28876	232	27	3.84547e-90	Up-regulated
ABHD2	Pig	1.6166e-94	5.59484	185	6	5.90787e-90	Up-regulated
FAM111A	Pig	3.08583e-94	2.50158	209	15	1.12772e-89	Up-regulated
PHF21A	Pig	4.79776e-94	1.16131	562	231	1.75334e-89	Up-regulated
RABEP1	Pig	4.90957e-94	1.16995	0.62	286	1.7942e-89	Up-regulated
EMP1	Pig	6.26477e-94	0.985269	428	131	2.28946e-89	Up-regulated
ACTN1	Pig	6.70552e-94	1.2145	428	132	2.45053e-89	Up-regulated
SAMHD1	Pig	7.21829e-94	1.26762	399	115	2.63792e-89	Up-regulated
KIF26B	Pig	8.59693e-94	6.19661	177	3	3.14175e-89	Up-regulated
NXN	Pig	9.44058e-94	1.31335	387	108	3.45006e-89	Up-regulated
CTSC	Pig	1.12018e-93	10.8778	169	0	4.09368e-89	Up-regulated
ENSSSCG00000031462	Pig	1.57151e-93	1.49436	472	177	5.74308e-89	Up-regulated
TSC22D1	Pig	3.47577e-93	0.862179	463	155	1.27022e-88	Up-regulated
EDNRA	Pig	3.81512e-93	10.9651	168	0	1.39424e-88	Up-regulated
PDK4	Pig	3.81512e-93	11.3618	168	0	1.39424e-88	Up-regulated
VDR	Pig	5.00239e-93	4.90304	175	3	1.82812e-88	Up-regulated
DTX3L	Pig	5.80514e-93	3.10579	193	9	2.12149e-88	Up-regulated
GJA1	Pig	1.29797e-92	10.3412	167	0	4.74345e-88	Up-regulated
BAZ1A	Pig	1.55941e-92	2.39068	298	61	5.69885e-88	Up-regulated
BMPR2	Pig	2.01276e-92	1.11125	572	243	7.35563e-88	Up-regulated
PLEKHM3	Pig	2.39316e-92	10.6063	167	0	8.74579e-88	Up-regulated
PRRX2	Pig	1.0084e-91	1.5735	305	62	3.6852e-87	Up-regulated
SLC10A7	Pig	1.8374e-91	1.61333	341	83	6.71479e-87	Up-regulated
FAM168A	Pig	3.9439e-91	1.60107	0.38	0.11	1.4413e-86	Up-regulated
PDE8A	Pig	6.58967e-91	1.36611	458	162	2.40819e-86	Up-regulated
TEAD1	Pig	1.58267e-90	1.11319	0.71	413	5.78387e-86	Up-regulated
ACOT9	Pig	1.97798e-90	2.43076	326	84	7.22852e-86	Up-regulated
AP3B1	Pig	2.16806e-90	1.01612	608	265	7.92317e-86	Up-regulated
NOTCH2	Pig	2.66454e-90	0.806962	706	0.37	9.73756e-86	Up-regulated
USP6NL	Pig	5.25659e-90	2.59055	227	26	1.92102e-85	Up-regulated
KIF1B	Pig	6.65857e-90	1.09829	574	263	2.43338e-85	Up-regulated
KLF7	Pig	9.71007e-90	0.744245	579	237	3.54854e-85	Up-regulated
SMURF1	Pig	1.88046e-89	1.56624	395	121	6.87215e-85	Up-regulated
FAM126A	Pig	4.5084e-89	1.24509	499	194	1.6476e-84	Up-regulated
RICTOR	Pig	6.05333e-89	1.21441	468	0.17	2.21219e-84	Up-regulated
OSBPL3	Pig	9.57469e-89	8.64104	162	0	3.49907e-84	Up-regulated
ADGRL2	Pig	1.10145e-88	1.06867	528	213	4.02525e-84	Up-regulated
LURAP1L	Pig	1.68345e-88	3.00527	205	18	6.15218e-84	Up-regulated
ITGB1	Pig	2.15228e-88	0.988098	618	288	7.8655e-84	Up-regulated
CRLF1	Pig	2.24223e-88	10.9671	0.16	0	8.19424e-84	Up-regulated
ENSSSCG00000014565	Pig	2.55647e-88	2.40251	231	29	9.34263e-84	Up-regulated
ENSSSCG00000024974	Pig	3.48003e-88	2.10456	252	39	1.27178e-83	Up-regulated
TMSB10	Pig	3.82042e-88	2.02881	249	37	1.39617e-83	Up-regulated
SLC20A1	Pig	4.18576e-88	2.54755	244	36	1.52969e-83	Up-regulated
RAPGEF2	Pig	5.12242e-88	1.07334	525	222	1.87199e-83	Up-regulated
PDLIM7	Pig	6.93607e-88	3.01755	241	37	2.53479e-83	Up-regulated
ATXN7L1	Pig	6.9487e-88	1.53627	409	133	2.5394e-83	Up-regulated
MDM2	Pig	7.0607e-88	1.56946	412	137	2.58033e-83	Up-regulated
LRP6	Pig	7.40336e-88	0.934847	688	356	2.70556e-83	Up-regulated
DAB2	Pig	9.85622e-88	1.26544	564	256	3.60196e-83	Up-regulated
CPEB2	Pig	1.04814e-87	2.24882	263	47	3.83042e-83	Up-regulated
GNAI1	Pig	2.01401e-87	1.44322	429	144	7.3602e-83	Up-regulated
IRF2	Pig	2.43844e-87	1.71641	357	101	8.91128e-83	Up-regulated
BMPR1B	Pig	2.54347e-87	11.1648	158	0	9.29511e-83	Up-regulated
ASPN	Pig	8.85977e-87	2.1036	295	65	3.2378e-82	Up-regulated
KIAA1217	Pig	1.05615e-86	1.19651	419	138	3.85971e-82	Up-regulated
SLC30A7	Pig	1.11708e-86	1.06152	415	0.13	4.08239e-82	Up-regulated
RABGAP1	Pig	1.28596e-86	1.38343	428	149	4.69953e-82	Up-regulated
HERC4	Pig	2.06675e-86	1.36502	439	0.16	7.55295e-82	Up-regulated
ENSSSCG00000014280	Pig	2.16372e-86	0.863852	674	328	7.90733e-82	Up-regulated
TLE1	Pig	2.53974e-86	2.1122	221	26	9.28149e-82	Up-regulated
PTPN4	Pig	2.7926e-86	4.64829	169	5	1.02055e-81	Up-regulated
C1orf21	Pig	4.5245e-86	0.887395	762	472	1.65348e-81	Up-regulated
ANKRD17	Pig	8.39255e-86	0.947125	639	333	3.06706e-81	Up-regulated
PI16	Pig	9.59777e-86	3.73413	186	12	3.50751e-81	Up-regulated
SLFN11	Pig	1.0641e-85	4.56105	175	7	3.88874e-81	Up-regulated
AOPEP	Pig	1.13486e-85	0.839292	824	569	4.14736e-81	Up-regulated
AMPD3	Pig	1.48926e-85	7.36158	158	1	5.4425e-81	Up-regulated
RCSD1	Pig	1.76916e-85	3.947	187	13	6.4654e-81	Up-regulated
WNK1	Pig	1.91198e-85	1.25446	492	202	6.98735e-81	Up-regulated
ATAD1	Pig	2.09641e-85	1.1183	522	214	7.66133e-81	Up-regulated
RFX7	Pig	2.46611e-85	1.21945	476	176	9.0124e-81	Up-regulated
C7	Pig	2.63487e-85	1.85253	375	124	9.62912e-81	Up-regulated
ENSSSCG00000014242	Pig	3.25765e-85	3.32159	222	0.03	1.19051e-80	Up-regulated
OSBPL11	Pig	4.74922e-85	4.00012	185	13	1.7356e-80	Up-regulated
RPL28	Pig	4.96351e-85	1.16831	292	0.06	1.81391e-80	Up-regulated
CHODL	Pig	5.81209e-85	2.31838	229	32	2.12403e-80	Up-regulated
CLTC	Pig	6.86307e-85	1.39381	0.4	128	2.50811e-80	Up-regulated
CCL2	Pig	7.11925e-85	2.29627	226	0.03	2.60173e-80	Up-regulated
GPR39	Pig	7.78352e-85	6.39652	162	3	2.84449e-80	Up-regulated
RCL1	Pig	9.45641e-85	1.4825	0.32	78	3.45585e-80	Up-regulated
PSMD14	Pig	1.13478e-84	1.59882	315	74	4.14705e-80	Up-regulated
NR6A1	Pig	1.4787e-84	1.95622	287	63	5.40391e-80	Up-regulated
ESYT2	Pig	2.77407e-84	1.63335	366	112	1.01378e-79	Up-regulated
ENSSSCG00000049691	Pig	1.656e-83	0.997754	597	276	6.05184e-79	Up-regulated
TSC22D2	Pig	2.98635e-83	1.76891	329	91	1.09136e-78	Up-regulated
STPG4	Pig	4.28585e-83	2.67714	238	39	1.56627e-78	Up-regulated
FNIP1	Pig	4.64491e-83	1.04706	608	283	1.69748e-78	Up-regulated
GOLGA4	Pig	5.76547e-83	2.33164	253	47	2.10699e-78	Up-regulated
LRP12	Pig	1.04962e-82	2.33102	275	0.06	3.83583e-78	Up-regulated
NSD3	Pig	1.21896e-82	1.16292	548	238	4.45468e-78	Up-regulated
SYBU	Pig	1.38282e-82	4.80549	164	5	5.05351e-78	Up-regulated
ENSSSCG00000047553	Pig	2.99795e-82	4.19084	177	11	1.0956e-77	Up-regulated
GOLGB1	Pig	4.23323e-82	1.29958	0.48	187	1.54704e-77	Up-regulated
TEX14	Pig	5.21783e-82	2.2522	288	66	1.90685e-77	Up-regulated
ANKRD28	Pig	6.40708e-82	0.999316	521	219	2.34147e-77	Up-regulated
ZBTB38	Pig	1.16407e-81	2.28289	265	55	4.25411e-77	Up-regulated
UBAP2	Pig	2.03045e-81	1.6188	388	132	7.42028e-77	Up-regulated
PSMD1	Pig	2.16342e-81	1.52187	343	99	7.90622e-77	Up-regulated
NRIP1	Pig	2.53474e-81	1.2158	486	195	9.2632e-77	Up-regulated
NIBAN1	Pig	3.29339e-81	2.58561	247	47	1.20357e-76	Up-regulated
ENSSSCG00000009240	Pig	4.25286e-81	4.60095	162	6	1.55421e-76	Up-regulated
CCSER2	Pig	6.71091e-81	1.08447	526	222	2.4525e-76	Up-regulated
BMT2	Pig	9.07753e-81	1.61516	311	79	3.31738e-76	Up-regulated
SDK1	Pig	1.04699e-80	2.4731	263	55	3.82624e-76	Up-regulated
SEMA3C	Pig	1.19451e-80	2.04845	315	87	4.36535e-76	Up-regulated
CA12	Pig	1.47479e-80	4.00957	0.18	13	5.38963e-76	Up-regulated
HBP1	Pig	2.03754e-80	1.298	403	133	7.44619e-76	Up-regulated
RTN4	Pig	2.55949e-80	0.833116	622	302	9.35367e-76	Up-regulated
ADGRA3	Pig	3.31289e-80	2.11422	282	65	1.2107e-75	Up-regulated
AMMECR1	Pig	3.44414e-80	2.31313	261	54	1.25866e-75	Up-regulated
ATXN1	Pig	3.55792e-80	0.863271	0.67	374	1.30024e-75	Up-regulated
DIPK1A	Pig	1.40125e-79	2.47487	247	47	5.12088e-75	Up-regulated
F3	Pig	1.543e-79	8.12591	146	0	5.63888e-75	Up-regulated
ELF1	Pig	1.65337e-79	1.32083	438	162	6.04223e-75	Up-regulated
KDM3A	Pig	2.81673e-79	1.8376	286	66	1.02937e-74	Up-regulated
SYNJ2	Pig	2.82024e-79	1.71573	253	47	1.03066e-74	Up-regulated
ENSSSCG00000011237	Pig	3.4643e-79	0.923077	472	178	1.26603e-74	Up-regulated
EIF3M	Pig	4.6855e-79	1.48738	291	69	1.71231e-74	Up-regulated
FLNA	Pig	7.16061e-79	2.92234	0.21	29	2.61684e-74	Up-regulated
RPS15	Pig	7.93152e-79	1.40726	356	107	2.89858e-74	Up-regulated
RBKS	Pig	9.14173e-79	2.88348	215	31	3.34085e-74	Up-regulated
KANSL1	Pig	9.88928e-79	0.888528	0.7	383	3.61404e-74	Up-regulated
C2CD3	Pig	1.83703e-78	1.47066	323	86	6.71342e-74	Up-regulated
CAMK2D	Pig	1.87214e-78	0.707981	845	588	6.84172e-74	Up-regulated
RASSF8	Pig	2.90001e-78	1.04314	514	219	1.05981e-73	Up-regulated
CCNT1	Pig	5.78306e-78	2.52271	221	35	2.11342e-73	Up-regulated
RAB1A	Pig	6.29272e-78	1.17867	434	159	2.29968e-73	Up-regulated
WDR7	Pig	1.0685e-77	1.11264	436	162	3.90483e-73	Up-regulated
SLC2A13	Pig	1.51004e-77	0.81427	496	197	5.51845e-73	Up-regulated
ACTB	Pig	1.51302e-77	1.53874	318	86	5.52931e-73	Up-regulated
MAST2	Pig	1.60335e-77	2.42388	234	42	5.85943e-73	Up-regulated
FGFR2	Pig	2.08916e-77	2.1209	234	41	7.63483e-73	Up-regulated
TPM4	Pig	2.40147e-77	1.22733	237	41	8.77619e-73	Up-regulated
ENSSSCG00000007203	Pig	2.65607e-77	1.21496	364	112	9.70663e-73	Up-regulated
SERTAD2	Pig	3.43572e-77	3.27478	187	19	1.25558e-72	Up-regulated
VGLL3	Pig	3.62486e-77	1.51089	301	77	1.32471e-72	Up-regulated
ZFAND3	Pig	4.32964e-77	0.732802	816	562	1.58227e-72	Up-regulated
ANXA4	Pig	4.99498e-77	2.10289	265	58	1.82541e-72	Up-regulated
NCBP1	Pig	6.50885e-77	4.10641	0.16	7	2.37866e-72	Up-regulated
PLPP1	Pig	8.69256e-77	1.21921	559	272	3.1767e-72	Up-regulated
GPD2	Pig	8.75925e-77	3.29382	0.19	21	3.20107e-72	Up-regulated
GALNT15	Pig	1.12535e-76	1.42144	0.34	103	4.11259e-72	Up-regulated
IL34	Pig	1.72904e-76	2.01945	295	77	6.31878e-72	Up-regulated
ABL1	Pig	1.88893e-76	1.30605	0.45	185	6.90308e-72	Up-regulated
LPP	Pig	2.39517e-76	0.690063	0.78	495	8.75313e-72	Up-regulated
LAP3	Pig	2.49763e-76	4.2739	161	8	9.1276e-72	Up-regulated
GPCPD1	Pig	2.89419e-76	1.37418	474	202	1.05768e-71	Up-regulated
SLMAP	Pig	3.33586e-76	1.12661	415	153	1.21909e-71	Up-regulated
CACUL1	Pig	6.11746e-76	1.48064	323	91	2.23563e-71	Up-regulated
ENSSSCG00000029160	Pig	8.79203e-76	4.56329	151	5	3.21305e-71	Up-regulated
RIC8B	Pig	1.24214e-75	1.83393	284	0.07	4.53941e-71	Up-regulated
MARCHF8	Pig	1.78691e-75	3.48558	185	0.02	6.53025e-71	Up-regulated
DSEL	Pig	2.28243e-75	2.25516	202	27	8.34112e-71	Up-regulated
EPS8	Pig	5.43992e-75	0.672534	727	411	1.98802e-70	Up-regulated
C2CD5	Pig	1.58296e-74	1.6297	335	104	5.78491e-70	Up-regulated
FUT8	Pig	2.63668e-74	0.802224	528	226	9.63573e-70	Up-regulated
RNFT1	Pig	3.77405e-74	2.95873	189	22	1.37923e-69	Up-regulated
ENSSSCG00000022925	Pig	4.44525e-74	5.9118	145	4	1.62452e-69	Up-regulated
ARNTL2	Pig	5.94524e-74	2.17711	214	34	2.17269e-69	Up-regulated
PLEC	Pig	6.16289e-74	4.29325	162	11	2.25223e-69	Up-regulated
KIFAP3	Pig	7.00727e-74	0.760964	413	144	2.56081e-69	Up-regulated
SNX24	Pig	7.12362e-74	1.17845	344	104	2.60333e-69	Up-regulated
ENSSSCG00000004666	Pig	7.4455e-74	1.02887	329	94	2.72096e-69	Up-regulated
TXNRD1	Pig	1.13447e-73	1.51416	286	71	4.14592e-69	Up-regulated
COL5A2	Pig	1.14012e-73	0.650493	0.91	762	4.16658e-69	Up-regulated
MORC3	Pig	2.8209e-73	1.53845	283	71	1.0309e-68	Up-regulated
SVEP1	Pig	3.10697e-73	0.995643	752	494	1.13544e-68	Up-regulated
TMEM131L	Pig	3.64048e-73	2.76874	212	35	1.33041e-68	Up-regulated
ARFGEF1	Pig	4.09027e-73	0.894562	552	261	1.49479e-68	Up-regulated
ZNF654	Pig	6.54487e-73	1.36954	369	126	2.39182e-68	Up-regulated
DAAM1	Pig	1.09825e-72	0.947599	623	319	4.01355e-68	Up-regulated
ZZZ3	Pig	1.25054e-72	0.945142	0.54	241	4.57011e-68	Up-regulated
CSNK1G3	Pig	1.44158e-72	0.840696	425	154	5.26824e-68	Up-regulated
ENSSSCG00000007080	Pig	1.60505e-72	1.51145	326	98	5.86565e-68	Up-regulated
PRRG1	Pig	1.72384e-72	3.16875	185	22	6.29978e-68	Up-regulated
GPR155	Pig	1.74025e-72	1.0681	338	102	6.35976e-68	Up-regulated
ROCK2	Pig	1.81839e-72	0.897468	499	215	6.64532e-68	Up-regulated
ACSL4	Pig	1.83582e-72	0.959822	565	269	6.709e-68	Up-regulated
TRIB2	Pig	3.26312e-72	2.6764	213	36	1.19251e-67	Up-regulated
CDH13	Pig	3.37298e-72	3.34502	158	0.01	1.23266e-67	Up-regulated
SERINC5	Pig	3.93019e-72	2.1309	243	52	1.43629e-67	Up-regulated
SNX13	Pig	5.84254e-72	1.40827	0.33	101	2.13516e-67	Up-regulated
IKZF2	Pig	9.7171e-72	3.01538	187	24	3.55111e-67	Up-regulated
DLG1	Pig	1.26366e-71	0.849365	631	0.33	4.61806e-67	Up-regulated
EIF2AK3	Pig	1.29722e-71	0.785033	507	0.21	4.74069e-67	Up-regulated
RASSF9	Pig	1.96092e-71	2.19989	185	22	7.16617e-67	Up-regulated
RPL29	Pig	2.74801e-71	1.74887	218	37	1.00426e-66	Up-regulated
TTC23	Pig	2.9988e-71	7.41515	131	0	1.09591e-66	Up-regulated
IL17RD	Pig	3.09955e-71	1.05553	0.3	81	1.13273e-66	Up-regulated
SCFD1	Pig	3.391e-71	0.920778	432	161	1.23924e-66	Up-regulated
PLAG1	Pig	3.94928e-71	1.80644	299	84	1.44326e-66	Up-regulated
TBC1D9	Pig	6.23448e-71	4.04246	157	11	2.27839e-66	Up-regulated
SNTB2	Pig	6.49491e-71	0.781436	609	0.3	2.37356e-66	Up-regulated
KIF3C	Pig	8.94354e-71	2.41106	198	29	3.26842e-66	Up-regulated
CASK	Pig	1.01084e-70	0.748684	563	0.26	3.69413e-66	Up-regulated
UCK2	Pig	1.20252e-70	3.76067	158	11	4.39459e-66	Up-regulated
PFKFB4	Pig	1.23103e-70	4.59998	154	0.01	4.49879e-66	Up-regulated
NDRG1	Pig	1.32565e-70	1.87249	247	55	4.84457e-66	Up-regulated
PICALM	Pig	1.38027e-70	0.878098	577	286	5.04419e-66	Up-regulated
APPL2	Pig	1.59911e-70	2.45961	0.22	42	5.84395e-66	Up-regulated
DIP2B	Pig	2.13902e-70	1.03511	456	186	7.81703e-66	Up-regulated
PPP4R2	Pig	2.26743e-70	1.16407	341	106	8.28631e-66	Up-regulated
OSMR	Pig	6.65802e-70	1.35608	251	56	2.43318e-65	Up-regulated
CTHRC1	Pig	7.60777e-70	3.20238	149	8	2.78026e-65	Up-regulated
TNS1	Pig	7.65971e-70	1.09484	0.67	391	2.79924e-65	Up-regulated
LCOR	Pig	9.10665e-70	0.938194	512	229	3.32803e-65	Up-regulated
EHD4	Pig	9.86261e-70	2.61146	196	0.03	3.60429e-65	Up-regulated
USO1	Pig	1.22694e-69	1.20183	421	162	4.48386e-65	Up-regulated
ABHD18	Pig	1.52031e-69	5.37285	139	5	5.55596e-65	Up-regulated
ENSSSCG00000036556	Pig	1.91399e-69	1.56158	246	54	6.99469e-65	Up-regulated
GALNT10	Pig	1.9324e-69	0.687015	488	0.2	7.06197e-65	Up-regulated
NCEH1	Pig	2.06234e-69	10.1721	127	0	7.53683e-65	Up-regulated
SETDB2	Pig	2.23752e-69	3.7092	154	0.01	8.17702e-65	Up-regulated
TMOD3	Pig	2.27025e-69	0.8614	0.42	159	8.29662e-65	Up-regulated
RAP1GDS1	Pig	3.32851e-69	1.92186	227	45	1.2164e-64	Up-regulated
TSHZ3	Pig	6.23256e-69	0.951101	324	98	2.27769e-64	Up-regulated
RNF13	Pig	6.88812e-69	1.17786	382	137	2.51726e-64	Up-regulated
UGGT1	Pig	7.32418e-69	1.51625	325	102	2.67662e-64	Up-regulated
PPA1	Pig	8.798e-69	4.93859	134	3	3.21523e-64	Up-regulated
ENSSSCG00000006231	Pig	1.57119e-68	3.35629	168	18	5.7419e-64	Up-regulated
MYOCD	Pig	2.09481e-68	4.85181	134	3	7.65549e-64	Up-regulated
NBN	Pig	2.41052e-68	0.930957	542	246	8.80924e-64	Up-regulated
ABCD3	Pig	3.18637e-68	2.23086	211	38	1.16446e-63	Up-regulated
BHLHE40	Pig	3.71001e-68	3.86675	144	7	1.35582e-63	Up-regulated
SETD7	Pig	4.07053e-68	1.44786	335	0.11	1.48758e-63	Up-regulated
ENSSSCG00000017754	Pig	8.89085e-68	2.93763	161	14	3.24916e-63	Up-regulated
PMS1	Pig	9.47081e-68	2.13955	236	53	3.46111e-63	Up-regulated
CORIN	Pig	1.12034e-67	7.58838	125	0	4.09428e-63	Up-regulated
CNOT6	Pig	1.29267e-67	1.8449	243	55	4.72404e-63	Up-regulated
MTUS1	Pig	1.5803e-67	3.12813	194	32	5.7752e-63	Up-regulated
RASSF3	Pig	2.94815e-67	2.82109	186	27	1.0774e-62	Up-regulated
PIK3CA	Pig	3.56998e-67	1.01363	422	162	1.30465e-62	Up-regulated
HEATR5B	Pig	3.7036e-67	1.8749	221	43	1.35348e-62	Up-regulated
UHRF1BP1L	Pig	5.39355e-67	0.810841	345	112	1.97107e-62	Up-regulated
UGDH	Pig	7.20865e-67	1.40761	286	0.08	2.6344e-62	Up-regulated
ZNF106	Pig	8.538e-67	4.00393	145	9	3.12021e-62	Up-regulated
ENSSSCG00000042520	Pig	1.02299e-66	2.48975	168	18	3.73852e-62	Up-regulated
ENSSSCG00000006206	Pig	1.24685e-66	1.64768	0.28	77	4.55662e-62	Up-regulated
LTBP2	Pig	1.3322e-66	0.923447	383	0.14	4.86854e-62	Up-regulated
METAP1	Pig	1.41824e-66	3.13254	172	21	5.18297e-62	Up-regulated
SMARCAD1	Pig	1.52955e-66	0.981678	335	105	5.58973e-62	Up-regulated
HLCS	Pig	1.6638e-66	0.850527	302	87	6.08037e-62	Up-regulated
HTR2A	Pig	2.82255e-66	7.73805	124	1	1.0315e-61	Up-regulated
RIMS1	Pig	4.25687e-66	11.5149	121	0	1.55567e-61	Up-regulated
PDIA5	Pig	4.63693e-66	4.25003	0.14	7	1.69456e-61	Up-regulated
TBC1D23	Pig	6.15009e-66	1.14843	375	135	2.24755e-61	Up-regulated
DYNC1I1	Pig	7.64367e-66	10.1709	0.12	0	2.79338e-61	Up-regulated
NEXN	Pig	8.2769e-66	5.7766	126	2	3.02479e-61	Up-regulated
ACSL5	Pig	8.56728e-66	2.13748	0.19	29	3.13091e-61	Up-regulated
SLC1A2	Pig	9.84932e-66	4.87834	134	5	3.59943e-61	Up-regulated
PARP9	Pig	1.08283e-65	3.65229	139	7	3.9572e-61	Up-regulated
IQGAP2	Pig	1.6161e-65	1.31514	422	0.18	5.90602e-61	Up-regulated
PTBP3	Pig	1.95924e-65	0.989133	0.36	124	7.16006e-61	Up-regulated
IPMK	Pig	2.04904e-65	3.17977	164	18	7.48823e-61	Up-regulated
BICC1	Pig	2.07827e-65	0.682448	898	704	7.59503e-61	Up-regulated
DDIT4	Pig	2.37602e-65	1.22269	348	123	8.68317e-61	Up-regulated
CTDSPL	Pig	2.38082e-65	1.03605	539	262	8.70069e-61	Up-regulated
ATXN7	Pig	2.4276e-65	1.0983	392	147	8.87165e-61	Up-regulated
SNX18	Pig	2.48849e-65	1.8278	236	53	9.0942e-61	Up-regulated
GXYLT2	Pig	2.60242e-65	0.780717	554	266	9.51054e-61	Up-regulated
LOXL1	Pig	2.61635e-65	1.21154	268	0.07	9.56147e-61	Up-regulated
TTC27	Pig	3.71256e-65	1.72819	221	44	1.35676e-60	Up-regulated
PRKAR2A	Pig	4.34657e-65	1.32151	412	168	1.58845e-60	Up-regulated
MTAP	Pig	4.46345e-65	1.5184	211	0.04	1.63117e-60	Up-regulated
STT3B	Pig	6.28191e-65	0.710065	0.51	226	2.29572e-60	Up-regulated
LGALS8	Pig	6.95449e-65	1.34284	285	0.08	2.54152e-60	Up-regulated
RAB10	Pig	7.22122e-65	1.07684	364	129	2.63899e-60	Up-regulated
SLC25A26	Pig	1.1477e-64	1.50393	238	54	4.19429e-60	Up-regulated
ITSN1	Pig	1.28794e-64	1.08409	592	309	4.70677e-60	Up-regulated
SELENOM	Pig	1.39142e-64	2.30301	155	14	5.08495e-60	Up-regulated
MAX	Pig	1.57951e-64	1.6614	241	57	5.77232e-60	Up-regulated
APC	Pig	2.23566e-64	0.992443	439	0.18	8.17021e-60	Up-regulated
AFG1L	Pig	2.34944e-64	1.69598	241	57	8.58604e-60	Up-regulated
THSD1	Pig	2.44863e-64	1.74904	194	32	8.94852e-60	Up-regulated
PTPRK	Pig	2.49381e-64	1.13483	415	176	9.11362e-60	Up-regulated
SP110	Pig	2.5412e-64	2.23014	176	24	9.28681e-60	Up-regulated
RARS2	Pig	3.3882e-64	1.87271	222	47	1.23822e-59	Up-regulated
EEA1	Pig	4.65277e-64	0.978616	407	158	1.70035e-59	Up-regulated
LUZP1	Pig	5.67228e-64	1.61883	273	77	2.07293e-59	Up-regulated
SHROOM4	Pig	5.69822e-64	1.40463	221	46	2.08241e-59	Up-regulated
TMEM161B	Pig	8.0582e-64	1.45937	259	67	2.94487e-59	Up-regulated
PLEKHA4	Pig	8.49803e-64	2.72523	154	14	3.1056e-59	Up-regulated
EML4	Pig	9.09129e-64	0.857064	403	154	3.32241e-59	Up-regulated
TLK1	Pig	1.02413e-63	0.79555	584	0.29	3.74268e-59	Up-regulated
FLRT2	Pig	1.04236e-63	1.26597	261	69	3.80931e-59	Up-regulated
PSMA6	Pig	1.7461e-63	1.47511	0.25	63	6.38111e-59	Up-regulated
RNF125	Pig	1.77149e-63	1.19707	264	69	6.4739e-59	Up-regulated
CTSH	Pig	1.95827e-63	0.993389	302	91	7.15649e-59	Up-regulated
PTX3	Pig	2.48859e-63	2.87803	163	19	9.09454e-59	Up-regulated
NUPR1	Pig	2.5839e-63	1.65867	335	122	9.44288e-59	Up-regulated
LRRK2	Pig	3.80167e-63	1.23355	366	135	1.38932e-58	Up-regulated
ENSSSCG00000005959	Pig	4.10692e-63	4.45623	132	6	1.50087e-58	Up-regulated
DDAH1	Pig	4.44738e-63	2.94983	176	26	1.62529e-58	Up-regulated
MTMR2	Pig	4.45944e-63	0.889365	361	125	1.6297e-58	Up-regulated
GATA6	Pig	5.64533e-63	4.73919	133	7	2.06309e-58	Up-regulated
ENSSSCG00000026488	Pig	5.88473e-63	0.998325	374	136	2.15057e-58	Up-regulated
CLIP1	Pig	6.01466e-63	0.862033	625	333	2.19806e-58	Up-regulated
ENSSSCG00000039926	Pig	6.401e-63	1.3958	221	47	2.33925e-58	Up-regulated
UQCC1	Pig	7.07192e-63	1.94008	238	59	2.58443e-58	Up-regulated
AK4	Pig	7.75074e-63	1.08009	292	88	2.83251e-58	Up-regulated
BABAM2	Pig	9.30748e-63	0.800753	635	352	3.40142e-58	Up-regulated
TRAK1	Pig	1.02286e-62	1.43715	312	104	3.73803e-58	Up-regulated
DERA	Pig	1.74129e-62	2.87318	167	22	6.36356e-58	Up-regulated
PPP1R12B	Pig	1.94179e-62	2.29265	0.2	39	7.09627e-58	Up-regulated
MAP3K8	Pig	2.74348e-62	2.84346	155	16	1.00261e-57	Up-regulated
ITGA2B	Pig	3.15621e-62	0.925518	485	219	1.15344e-57	Up-regulated
WDR25	Pig	3.78308e-62	2.31798	0.18	27	1.38253e-57	Up-regulated
ENSSSCG00000011272	Pig	3.99922e-62	1.45681	211	42	1.46152e-57	Up-regulated
ARHGAP5	Pig	4.96095e-62	1.10133	409	165	1.81298e-57	Up-regulated
ENSSSCG00000001341	Pig	5.33437e-62	1.07157	348	124	1.94945e-57	Up-regulated
MNAT1	Pig	5.89702e-62	0.824869	444	182	2.15507e-57	Up-regulated
MEIS2	Pig	6.24951e-62	0.744576	666	0.39	2.28388e-57	Up-regulated
SVIL	Pig	8.27718e-62	0.869539	633	377	3.0249e-57	Up-regulated
TGFBR1	Pig	9.01288e-62	1.09355	294	89	3.29376e-57	Up-regulated
ASXL2	Pig	1.0966e-61	1.23307	317	105	4.00753e-57	Up-regulated
IVNS1ABP	Pig	1.11267e-61	4.66547	126	5	4.06627e-57	Up-regulated
TTC37	Pig	1.44584e-61	0.885845	359	127	5.28382e-57	Up-regulated
C21orf91	Pig	1.48377e-61	1.41001	0.29	87	5.42244e-57	Up-regulated
KLF6	Pig	2.01348e-61	0.979787	0.25	64	7.35827e-57	Up-regulated
HIPK3	Pig	2.72328e-61	1.15932	0.38	148	9.95223e-57	Up-regulated
OSBPL1A	Pig	3.11323e-61	1.05982	403	165	1.13773e-56	Up-regulated
VWA5A	Pig	5.43044e-61	1.13827	286	85	1.98456e-56	Up-regulated
IFIT5	Pig	6.75495e-61	1.21733	214	45	2.4686e-56	Up-regulated
ENSSSCG00000012006	Pig	7.83807e-61	3.93261	127	6	2.86442e-56	Up-regulated
HSD17B12	Pig	7.91523e-61	1.18776	257	67	2.89262e-56	Up-regulated
PAXBP1	Pig	8.08249e-61	1.32954	329	115	2.95375e-56	Up-regulated
SPATS2L	Pig	1.13145e-60	0.866989	637	352	4.13487e-56	Up-regulated
CASP10	Pig	1.34412e-60	1.23786	233	55	4.91208e-56	Up-regulated
ZCCHC7	Pig	1.88278e-60	0.695745	653	354	6.88061e-56	Up-regulated
TTC39B	Pig	2.49977e-60	2.19881	0.2	0.04	9.13541e-56	Up-regulated
ENSSSCG00000035460	Pig	3.5195e-60	1.04587	289	89	1.2862e-55	Up-regulated
AVEN	Pig	3.73859e-60	1.04719	318	107	1.36627e-55	Up-regulated
FAM13A	Pig	4.05369e-60	1.00678	649	357	1.48142e-55	Up-regulated
FILIP1L	Pig	7.46066e-60	1.36487	319	108	2.7265e-55	Up-regulated
AGMO	Pig	1.26514e-59	1.35559	243	64	4.62344e-55	Up-regulated
REEP3	Pig	1.65398e-59	0.778011	678	395	6.04447e-55	Up-regulated
PHC2	Pig	2.45395e-59	1.09425	285	85	8.96797e-55	Up-regulated
RYK	Pig	2.74334e-59	0.773062	481	215	1.00255e-54	Up-regulated
SEC22A	Pig	2.83556e-59	1.21836	304	99	1.03625e-54	Up-regulated
GATAD2B	Pig	2.88925e-59	0.911615	531	256	1.05588e-54	Up-regulated
EIF3H	Pig	4.22083e-59	0.962945	301	94	1.5425e-54	Up-regulated
MIPOL1	Pig	4.37791e-59	0.885048	355	128	1.59991e-54	Up-regulated
ATP1A1	Pig	4.72588e-59	4.32291	117	3	1.72707e-54	Up-regulated
PLEKHA7	Pig	4.82204e-59	2.57232	168	26	1.76221e-54	Up-regulated
SKIL	Pig	5.08629e-59	0.925708	333	118	1.85878e-54	Up-regulated
TAF4B	Pig	5.42147e-59	2.44593	154	18	1.98128e-54	Up-regulated
FAM13B	Pig	5.75246e-59	0.847323	491	223	2.10224e-54	Up-regulated
AGPS	Pig	6.01378e-59	0.927574	361	133	2.19774e-54	Up-regulated
RANBP9	Pig	6.06453e-59	1.25112	356	135	2.21628e-54	Up-regulated
ADAMTS5	Pig	6.53219e-59	1.14818	472	238	2.38719e-54	Up-regulated
ETNK1	Pig	1.11845e-58	1.09586	315	104	4.08737e-54	Up-regulated
ENSSSCG00000013052	Pig	1.19116e-58	1.86141	218	52	4.35311e-54	Up-regulated
CST3	Pig	1.21458e-58	3.37086	124	6	4.43869e-54	Up-regulated
FHL2	Pig	2.63925e-58	1.95148	117	3	9.64513e-54	Up-regulated
VSTM4	Pig	2.77427e-58	1.75812	264	0.08	1.01386e-53	Up-regulated
ITPRID2	Pig	2.86209e-58	0.940364	324	111	1.04595e-53	Up-regulated
GNAO1	Pig	2.87867e-58	10.3538	107	0	1.05201e-53	Up-regulated
ENSSSCG00000014672	Pig	3.1311e-58	5.4286	114	3	1.14426e-53	Up-regulated
ZFYVE16	Pig	4.55767e-58	0.887201	448	195	1.6656e-53	Up-regulated
TRAF3	Pig	4.73574e-58	1.15485	253	69	1.73068e-53	Up-regulated
MCFD2	Pig	5.84652e-58	2.38815	198	42	2.13661e-53	Up-regulated
EPB41L5	Pig	6.05751e-58	5.96552	0.11	1	2.21372e-53	Up-regulated
CLINT1	Pig	7.05515e-58	0.718267	375	143	2.57831e-53	Up-regulated
TTC7A	Pig	7.23884e-58	1.62321	262	77	2.64543e-53	Up-regulated
CDC42EP3	Pig	9.07857e-58	4.8332	116	3	3.31776e-53	Up-regulated
PUS7	Pig	1.20588e-57	1.04329	301	98	4.4069e-53	Up-regulated
PDK1	Pig	1.73633e-57	2.50219	175	0.03	6.34542e-53	Up-regulated
ENSSSCG00000039222	Pig	2.0042e-57	5.02737	115	3	7.32435e-53	Up-regulated
TMCC1	Pig	2.36683e-57	0.649764	581	307	8.64957e-53	Up-regulated
TFG	Pig	2.44829e-57	1.07447	255	71	8.94726e-53	Up-regulated
REEP5	Pig	3.41597e-57	1.76631	222	55	1.24837e-52	Up-regulated
RFTN2	Pig	4.66864e-57	1.00895	303	101	1.70615e-52	Up-regulated
RAD23B	Pig	5.84784e-57	0.987994	343	125	2.13709e-52	Up-regulated
RPH3AL	Pig	9.39648e-57	3.27848	152	0.02	3.43394e-52	Up-regulated
PNPT1	Pig	1.29832e-56	2.1995	174	0.03	4.74472e-52	Up-regulated
RPL35	Pig	1.39156e-56	1.41724	218	51	5.08545e-52	Up-regulated
BCL2L13	Pig	1.42041e-56	1.43904	277	88	5.1909e-52	Up-regulated
HEATR3	Pig	1.44896e-56	0.78621	439	186	5.29522e-52	Up-regulated
MEMO1	Pig	1.82913e-56	0.899648	355	133	6.68456e-52	Up-regulated
ARRDC4	Pig	2.02029e-56	3.91665	117	5	7.38316e-52	Up-regulated
FAM222B	Pig	2.695e-56	1.18075	329	119	9.84889e-52	Up-regulated
VPS13C	Pig	2.69795e-56	0.906044	437	195	9.85965e-52	Up-regulated
GPHN	Pig	2.78935e-56	0.634576	697	437	1.01937e-51	Up-regulated
ENSSSCG00000009293	Pig	3.24575e-56	1.56129	0.17	28	1.18616e-51	Up-regulated
PDLIM1	Pig	4.03056e-56	3.96628	125	8	1.47297e-51	Up-regulated
DCP2	Pig	4.91734e-56	1.3822	0.29	96	1.79704e-51	Up-regulated
CD2AP	Pig	5.05585e-56	1.17754	236	62	1.84766e-51	Up-regulated
PGM3	Pig	6.84936e-56	3.0316	139	14	2.5031e-51	Up-regulated
NEK1	Pig	7.27362e-56	0.900206	0.38	148	2.65814e-51	Up-regulated
RPL18	Pig	8.11737e-56	1.63789	197	42	2.96649e-51	Up-regulated
CDK8	Pig	9.90691e-56	0.690748	444	193	3.62048e-51	Up-regulated
SLIT2	Pig	1.00232e-55	0.70115	397	165	3.66297e-51	Up-regulated
ATP6V1A	Pig	1.21302e-55	3.44903	131	11	4.43298e-51	Up-regulated
NUFIP2	Pig	1.23644e-55	0.638785	427	181	4.51855e-51	Up-regulated
GLIS3	Pig	1.28462e-55	0.629321	707	438	4.69466e-51	Up-regulated
GALNT18	Pig	1.35169e-55	1.97513	179	34	4.93974e-51	Up-regulated
FBXL7	Pig	1.65421e-55	0.614764	853	656	6.04533e-51	Up-regulated
DPY19L1	Pig	1.68144e-55	0.636581	455	198	6.14483e-51	Up-regulated
ALS2	Pig	1.90911e-55	2.6849	156	23	6.97684e-51	Up-regulated
CPEB4	Pig	2.48886e-55	1.67743	199	44	9.09553e-51	Up-regulated
ADAM9	Pig	3.43252e-55	0.533219	597	306	1.25442e-50	Up-regulated
SPOCK1	Pig	3.65273e-55	5.96199	113	4	1.33489e-50	Up-regulated
HHAT	Pig	5.87077e-55	1.39041	0.23	61	2.14547e-50	Up-regulated
WBP1L	Pig	6.06937e-55	1.01383	425	185	2.21805e-50	Up-regulated
VTI1A	Pig	6.40454e-55	0.594034	523	248	2.34054e-50	Up-regulated
ENDOV	Pig	7.45271e-55	1.9488	173	31	2.72359e-50	Up-regulated
ADAR	Pig	8.38825e-55	1.51377	212	51	3.06549e-50	Up-regulated
PRICKLE2	Pig	9.05586e-55	0.659024	722	462	3.30947e-50	Up-regulated
FTL	Pig	9.85835e-55	1.97453	171	0.03	3.60274e-50	Up-regulated
ACVR1B	Pig	1.02078e-54	2.46864	149	0.02	3.73043e-50	Up-regulated
TTBK2	Pig	1.09503e-54	1.53826	229	61	4.0018e-50	Up-regulated
FAM98A	Pig	1.19797e-54	2.8877	135	13	4.37797e-50	Up-regulated
FHIT	Pig	1.22847e-54	1.51016	253	78	4.48944e-50	Up-regulated
NBR1	Pig	1.27742e-54	1.18674	325	0.12	4.66832e-50	Up-regulated
PKN2	Pig	1.4101e-54	0.749758	477	221	5.15322e-50	Up-regulated
UHRF2	Pig	1.59893e-54	1.38807	283	94	5.84328e-50	Up-regulated
MIGA1	Pig	1.8076e-54	1.19614	0.31	109	6.60587e-50	Up-regulated
TRPS1	Pig	1.99785e-54	0.539961	847	622	7.30114e-50	Up-regulated
ITGA9	Pig	2.0529e-54	1.91364	204	49	7.50232e-50	Up-regulated
TBC1D19	Pig	2.0846e-54	1.34074	238	66	7.61817e-50	Up-regulated
TANC2	Pig	2.59601e-54	0.859459	406	174	9.4871e-50	Up-regulated
PRPF4B	Pig	3.68968e-54	0.729447	0.53	0.26	1.34839e-49	Up-regulated
SPIDR	Pig	3.77276e-54	0.696307	402	171	1.37875e-49	Up-regulated
TCF12	Pig	3.98066e-54	0.560107	873	731	1.45473e-49	Up-regulated
NHS	Pig	4.2548e-54	0.505532	519	254	1.55492e-49	Up-regulated
CSNK1A1	Pig	4.51539e-54	0.936912	419	184	1.65015e-49	Up-regulated
PLBD1	Pig	4.5501e-54	3.23321	137	15	1.66284e-49	Up-regulated
PKP4	Pig	5.32045e-54	1.15792	407	189	1.94436e-49	Up-regulated
ESF1	Pig	5.78683e-54	1.01874	279	89	2.1148e-49	Up-regulated
CRACD	Pig	5.82119e-54	3.19438	142	18	2.12735e-49	Up-regulated
GTF2I	Pig	6.26732e-54	0.959547	426	0.19	2.29039e-49	Up-regulated
PRMT3	Pig	6.61076e-54	0.774915	347	131	2.4159e-49	Up-regulated
XPO6	Pig	7.16022e-54	1.05977	296	0.1	2.6167e-49	Up-regulated
SSR2	Pig	1.00206e-53	1.5017	197	44	3.66204e-49	Up-regulated
ACBD3	Pig	1.12387e-53	0.923233	294	98	4.10719e-49	Up-regulated
ECM2	Pig	1.43175e-53	1.31593	315	116	5.23234e-49	Up-regulated
CDIN1	Pig	1.74529e-53	1.37178	227	61	6.37816e-49	Up-regulated
KIZ	Pig	1.84373e-53	1.50247	213	53	6.73791e-49	Up-regulated
CTTNBP2NL	Pig	1.851e-53	3.22808	0.13	12	6.76449e-49	Up-regulated
TCP11L2	Pig	1.88921e-53	2.38054	164	28	6.90412e-49	Up-regulated
SENP7	Pig	1.90996e-53	0.852593	347	132	6.97996e-49	Up-regulated
NNT	Pig	2.15032e-53	1.51604	228	63	7.85833e-49	Up-regulated
STAT3	Pig	2.97812e-53	0.715543	0.47	218	1.08835e-48	Up-regulated
CAPRIN1	Pig	3.78448e-53	1.14445	319	118	1.38304e-48	Up-regulated
TRUB1	Pig	3.9103e-53	2.38027	162	27	1.42902e-48	Up-regulated
CAPZA1	Pig	4.4871e-53	0.991143	321	117	1.63981e-48	Up-regulated
ALDH2	Pig	5.13238e-53	1.84137	146	19	1.87563e-48	Up-regulated
ENSSSCG00000005247	Pig	5.3766e-53	2.54522	152	23	1.96488e-48	Up-regulated
ABI1	Pig	5.57892e-53	1.01277	349	138	2.03882e-48	Up-regulated
TRHDE	Pig	7.97518e-53	4.81129	109	4	2.91453e-48	Up-regulated
PCYT1A	Pig	9.60754e-53	1.18999	289	98	3.51108e-48	Up-regulated
ARMC2	Pig	1.08407e-52	1.34385	349	146	3.96175e-48	Up-regulated
MBD5	Pig	1.21088e-52	0.604698	688	429	4.42517e-48	Up-regulated
OXSR1	Pig	1.2468e-52	1.66309	222	61	4.55644e-48	Up-regulated
NSMCE1	Pig	1.34765e-52	4.31589	107	4	4.925e-48	Up-regulated
GNA12	Pig	1.45813e-52	0.520918	382	152	5.32875e-48	Up-regulated
YEATS2	Pig	1.64546e-52	1.62161	226	62	6.01333e-48	Up-regulated
MAPRE2	Pig	1.82325e-52	1.73728	213	56	6.66307e-48	Up-regulated
HK2	Pig	2.70669e-52	6.56315	102	2	9.8916e-48	Up-regulated
ACOX1	Pig	2.76223e-52	0.892661	291	98	1.00946e-47	Up-regulated
PSMC6	Pig	3.66614e-52	0.748221	341	0.13	1.33979e-47	Up-regulated
ARL8B	Pig	3.66692e-52	0.874502	306	108	1.34007e-47	Up-regulated
THBS1	Pig	3.81779e-52	1.04068	442	215	1.39521e-47	Up-regulated
DCBLD2	Pig	4.04796e-52	0.528162	519	255	1.47933e-47	Up-regulated
RHOT1	Pig	4.57017e-52	1.86386	191	44	1.67017e-47	Up-regulated
FMO4	Pig	4.73922e-52	1.03658	333	0.13	1.73195e-47	Up-regulated
MRS2	Pig	5.06857e-52	2.23096	147	21	1.85231e-47	Up-regulated
IGFBP2	Pig	6.11593e-52	7.2	0.1	2	2.23507e-47	Up-regulated
RPS8	Pig	6.25004e-52	0.702531	296	0.1	2.28408e-47	Up-regulated
G3BP2	Pig	6.41566e-52	1.98975	188	42	2.3446e-47	Up-regulated
CCDC186	Pig	1.01397e-51	1.08829	292	101	3.70557e-47	Up-regulated
NDFIP2	Pig	1.14865e-51	1.23198	231	64	4.19774e-47	Up-regulated
ERBB4	Pig	1.37319e-51	7.83228	96	0	5.01832e-47	Up-regulated
ZCCHC2	Pig	1.58903e-51	1.79232	184	0.04	5.80711e-47	Up-regulated
PLA2G4A	Pig	1.77318e-51	0.550977	504	245	6.4801e-47	Up-regulated
ENSSSCG00000014267	Pig	1.96188e-51	0.93973	386	0.17	7.16968e-47	Up-regulated
ATP6V0A1	Pig	2.13697e-51	3.37259	122	11	7.80954e-47	Up-regulated
ENSSSCG00000029830	Pig	2.17038e-51	1.30004	194	45	7.93164e-47	Up-regulated
KCNK2	Pig	2.51092e-51	2.20581	167	32	9.17614e-47	Up-regulated
IL16	Pig	2.869e-51	0.665935	448	211	1.04848e-46	Up-regulated
NEO1	Pig	2.90652e-51	1.04109	359	146	1.06219e-46	Up-regulated
WDSUB1	Pig	3.14779e-51	2.20877	156	27	1.15036e-46	Up-regulated
CSRP2	Pig	3.52773e-51	1.18823	189	42	1.28921e-46	Up-regulated
PDE4DIP	Pig	3.53457e-51	3.47734	99	2	1.29171e-46	Up-regulated
DUSP1	Pig	3.71517e-51	2.17779	172	35	1.35771e-46	Up-regulated
CD81	Pig	4.19581e-51	1.08076	312	118	1.53336e-46	Up-regulated
GNB4	Pig	4.49787e-51	0.979227	257	0.08	1.64375e-46	Up-regulated
GOLGA5	Pig	4.5392e-51	0.854133	285	97	1.65885e-46	Up-regulated
SEC24A	Pig	6.79109e-51	0.821369	382	158	2.4818e-46	Up-regulated
CLOCK	Pig	6.83971e-51	0.700523	477	229	2.49957e-46	Up-regulated
CLMP	Pig	7.82419e-51	0.629809	623	342	2.85935e-46	Up-regulated
ENSSSCG00000027124	Pig	7.84887e-51	3.62005	107	5	2.86837e-46	Up-regulated
LRIG3	Pig	9.65817e-51	1.11209	218	0.06	3.52958e-46	Up-regulated
HACE1	Pig	1.09329e-50	0.71234	318	117	3.99543e-46	Up-regulated
ANXA1	Pig	1.15579e-50	0.594246	216	56	4.22382e-46	Up-regulated
ALPK1	Pig	1.34788e-50	1.80815	177	37	4.92584e-46	Up-regulated
SMAP2	Pig	1.41981e-50	3.08563	125	13	5.18871e-46	Up-regulated
SESN3	Pig	1.628e-50	0.546444	406	179	5.94952e-46	Up-regulated
ADAMTS1	Pig	2.24788e-50	1.59439	221	63	8.21489e-46	Up-regulated
MYO10	Pig	2.40685e-50	0.869908	0.31	115	8.79583e-46	Up-regulated
NXPE3	Pig	2.45098e-50	2.24861	139	19	8.95709e-46	Up-regulated
LMNTD1	Pig	2.47416e-50	1.8331	186	43	9.04181e-46	Up-regulated
EGFLAM	Pig	2.83917e-50	2.42769	136	17	1.03757e-45	Up-regulated
PAPSS1	Pig	3.00124e-50	0.57942	336	129	1.0968e-45	Up-regulated
USP9X	Pig	3.13011e-50	0.778302	433	197	1.1439e-45	Up-regulated
MCC	Pig	3.42629e-50	0.871204	413	188	1.25214e-45	Up-regulated
UFSP2	Pig	3.70909e-50	1.3739	206	53	1.35549e-45	Up-regulated
ZNF664	Pig	3.85382e-50	1.87828	181	0.04	1.40838e-45	Up-regulated
LHFPL6	Pig	5.08789e-50	0.558013	698	427	1.85937e-45	Up-regulated
AFAP1	Pig	5.38738e-50	1.26148	296	108	1.96882e-45	Up-regulated
ENSSSCG00000011676	Pig	5.38895e-50	1.48591	172	34	1.96939e-45	Up-regulated
GRAMD2B	Pig	6.05658e-50	5.62664	98	2	2.21338e-45	Up-regulated
WDR70	Pig	9.31734e-50	0.591623	412	178	3.40502e-45	Up-regulated
MAPK14	Pig	9.90687e-50	1.09189	283	98	3.62046e-45	Up-regulated
POLK	Pig	1.02339e-49	1.02088	259	83	3.73997e-45	Up-regulated
ETV4	Pig	1.13746e-49	4.69045	101	3	4.15684e-45	Up-regulated
TAX1BP1	Pig	1.20861e-49	0.96021	402	0.18	4.41688e-45	Up-regulated
F2R	Pig	1.28456e-49	2.06131	143	21	4.69444e-45	Up-regulated
LPGAT1	Pig	1.32833e-49	1.78291	0.19	46	4.85439e-45	Up-regulated
HADHB	Pig	1.51787e-49	6.43595	95	1	5.54704e-45	Up-regulated
ZMYM4	Pig	1.65201e-49	0.905723	378	159	6.03727e-45	Up-regulated
AREL1	Pig	1.8039e-49	1.99281	159	29	6.59237e-45	Up-regulated
RPSA	Pig	1.97388e-49	0.998495	223	61	7.21355e-45	Up-regulated
CUX1	Pig	2.0741e-49	1.12819	335	139	7.57979e-45	Up-regulated
CPQ	Pig	2.0889e-49	0.712433	325	124	7.63387e-45	Up-regulated
DENND4A	Pig	2.14752e-49	1.2	308	118	7.84809e-45	Up-regulated
MAPK10	Pig	2.70908e-49	0.612513	334	131	9.90034e-45	Up-regulated
GDI2	Pig	3.43783e-49	0.87073	333	131	1.25636e-44	Up-regulated
SRBD1	Pig	3.51405e-49	0.521376	407	173	1.28421e-44	Up-regulated
EYA3	Pig	5.68665e-49	1.2669	0.24	74	2.07818e-44	Up-regulated
GBF1	Pig	5.69807e-49	0.663978	516	265	2.08236e-44	Up-regulated
NRBF2	Pig	6.07277e-49	1.6172	182	41	2.21929e-44	Up-regulated
LMNA	Pig	6.91642e-49	1.66988	176	38	2.52761e-44	Up-regulated
FBXO30	Pig	8.48441e-49	1.83997	0.18	41	3.10063e-44	Up-regulated
NEMP2	Pig	9.78061e-49	2.35924	153	27	3.57432e-44	Up-regulated
MAPK8	Pig	1.106e-48	0.986717	313	118	4.04186e-44	Up-regulated
GORASP2	Pig	1.15491e-48	1.32983	245	78	4.2206e-44	Up-regulated
CEP170	Pig	1.2081e-48	0.520457	495	237	4.41502e-44	Up-regulated
GTF2E2	Pig	1.22707e-48	1.57129	229	0.07	4.48433e-44	Up-regulated
SLC35B4	Pig	1.45986e-48	9.34203	89	0	5.33504e-44	Up-regulated
KLHL3	Pig	1.95375e-48	6.19826	94	2	7.13999e-44	Up-regulated
TBC1D15	Pig	2.56291e-48	1.00453	298	0.11	9.36614e-44	Up-regulated
ENSSSCG00000010053	Pig	2.93466e-48	0.906196	459	222	1.07247e-43	Up-regulated
CFAP20DC	Pig	3.07911e-48	1.62173	0.19	47	1.12526e-43	Up-regulated
PLXNA4	Pig	3.28826e-48	1.43952	513	0.3	1.20169e-43	Up-regulated
SNX25	Pig	3.40895e-48	1.92914	157	0.03	1.2458e-43	Up-regulated
ENSSSCG00000007369	Pig	4.54694e-48	9.53985	88	0	1.66168e-43	Up-regulated
ZBTB44	Pig	5.46234e-48	0.795995	377	159	1.99621e-43	Up-regulated
ADAL	Pig	5.66303e-48	2.21578	151	27	2.06955e-43	Up-regulated
GALNT5	Pig	7.46297e-48	2.6642	109	8	2.72734e-43	Up-regulated
SLC25A3	Pig	8.13502e-48	3.10544	114	0.01	2.97294e-43	Up-regulated
KANK1	Pig	8.43918e-48	1.40626	299	121	3.0841e-43	Up-regulated
SLC25A20	Pig	9.96092e-48	2.69277	126	15	3.64022e-43	Up-regulated
PPP1R12A	Pig	1.32429e-47	0.622188	657	406	4.83962e-43	Up-regulated
C1RL	Pig	1.35337e-47	2.58687	112	9	4.9459e-43	Up-regulated
ENSSSCG00000037595	Pig	1.64998e-47	0.916305	223	64	6.02984e-43	Up-regulated
ENSSSCG00000041731	Pig	1.74738e-47	1.36285	161	32	6.38579e-43	Up-regulated
EPC1	Pig	1.86206e-47	0.669555	564	305	6.80491e-43	Up-regulated
NFATC1	Pig	2.05989e-47	2.41345	152	28	7.52787e-43	Up-regulated
GAB2	Pig	2.2748e-47	0.854622	714	492	8.31327e-43	Up-regulated
NINL	Pig	2.69841e-47	1.37866	183	44	9.86133e-43	Up-regulated
ENSSSCG00000007188	Pig	2.95345e-47	2.02504	171	38	1.07934e-42	Up-regulated
NSF	Pig	3.24286e-47	1.12857	254	84	1.1851e-42	Up-regulated
ACKR4	Pig	3.61581e-47	6.57018	92	2	1.3214e-42	Up-regulated
B4GALT1	Pig	3.67421e-47	0.953335	274	96	1.34274e-42	Up-regulated
PNPLA8	Pig	3.9405e-47	2.02497	153	29	1.44006e-42	Up-regulated
ASNS	Pig	4.31965e-47	1.67268	199	54	1.57862e-42	Up-regulated
PAK2	Pig	4.62239e-47	0.703501	466	227	1.68925e-42	Up-regulated
THSD4	Pig	4.91708e-47	3.16495	147	27	1.79695e-42	Up-regulated
ZRANB3	Pig	5.03899e-47	2.73957	128	17	1.8415e-42	Up-regulated
DGKI	Pig	5.53757e-47	7.0354	89	1	2.02371e-42	Up-regulated
EPG5	Pig	5.85396e-47	1.31296	233	73	2.13933e-42	Up-regulated
IRS2	Pig	9.29487e-47	5.41031	94	3	3.39681e-42	Up-regulated
GPAT4	Pig	9.37374e-47	4.27674	96	3	3.42564e-42	Up-regulated
ELF2	Pig	1.04323e-46	0.678029	0.47	229	3.81248e-42	Up-regulated
PLSCR1	Pig	1.15506e-46	0.555626	413	189	4.22118e-42	Up-regulated
MBNL2	Pig	1.16845e-46	0.525598	615	339	4.27011e-42	Up-regulated
ACO2	Pig	1.18307e-46	4.39826	0.1	5	4.32353e-42	Up-regulated
PHACTR1	Pig	1.30227e-46	1.96682	157	32	4.75916e-42	Up-regulated
SHQ1	Pig	1.43805e-46	1.34537	162	33	5.25536e-42	Up-regulated
ENSSSCG00000012102	Pig	1.48715e-46	1.18507	358	0.16	5.4348e-42	Up-regulated
SKAP2	Pig	1.6027e-46	5.55097	89	1	5.85708e-42	Up-regulated
CDKN1A	Pig	1.8393e-46	4.43012	95	3	6.72174e-42	Up-regulated
PTK7	Pig	2.07739e-46	0.789561	218	63	7.59182e-42	Up-regulated
MPHOSPH9	Pig	2.75396e-46	0.997887	209	58	1.00644e-41	Up-regulated
LGALS3	Pig	2.87635e-46	1.37047	185	47	1.05116e-41	Up-regulated
ENTPD1	Pig	3.20384e-46	2.11746	142	24	1.17084e-41	Up-regulated
ZNF292	Pig	3.58246e-46	0.673646	483	239	1.30921e-41	Up-regulated
RNGTT	Pig	3.7252e-46	0.673183	364	153	1.36137e-41	Up-regulated
COX10	Pig	3.82358e-46	4.20507	98	5	1.39733e-41	Up-regulated
TM2D1	Pig	3.88295e-46	1.24365	198	52	1.41902e-41	Up-regulated
FBXW8	Pig	3.97951e-46	1.30953	245	83	1.45431e-41	Up-regulated
FBXO32	Pig	4.02172e-46	5.23228	86	0	1.46974e-41	Up-regulated
PPP4R1	Pig	5.48582e-46	1.4679	223	69	2.00479e-41	Up-regulated
ENSSSCG00000023850	Pig	6.09379e-46	3.12785	111	0.01	2.22697e-41	Up-regulated
SMARCC1	Pig	6.88858e-46	0.866237	387	173	2.51743e-41	Up-regulated
NFXL1	Pig	7.47747e-46	0.786251	167	36	2.73264e-41	Up-regulated
CNNM2	Pig	7.59468e-46	2.2124	177	44	2.77548e-41	Up-regulated
LCORL	Pig	8.52079e-46	1.51163	191	51	3.11392e-41	Up-regulated
ATF6	Pig	8.6159e-46	0.621547	416	189	3.14868e-41	Up-regulated
FOXS1	Pig	9.65893e-46	4.1482	94	3	3.52986e-41	Up-regulated
MCUB	Pig	1.26605e-45	0.599191	332	135	4.62677e-41	Up-regulated
RHOA	Pig	1.38263e-45	0.6713	0.55	293	5.05284e-41	Up-regulated
KDELR2	Pig	1.43965e-45	1.11725	209	0.06	5.26121e-41	Up-regulated
PCMTD2	Pig	1.49641e-45	2.95021	0.12	15	5.46865e-41	Up-regulated
ZNF277	Pig	1.6338e-45	1.1602	237	77	5.97071e-41	Up-regulated
NONO	Pig	1.66006e-45	1.35517	233	75	6.06671e-41	Up-regulated
GPR161	Pig	1.70657e-45	1.10504	253	87	6.23665e-41	Up-regulated
KATNBL1	Pig	1.76559e-45	0.889122	327	134	6.45235e-41	Up-regulated
WDR26	Pig	2.29835e-45	1.47403	209	62	8.39932e-41	Up-regulated
SUCLG2	Pig	2.42395e-45	0.667572	463	236	8.85833e-41	Up-regulated
USP45	Pig	2.89929e-45	2.82269	118	14	1.05954e-40	Up-regulated
ANGPT1	Pig	2.99615e-45	1.21822	186	48	1.09494e-40	Up-regulated
FAM3C	Pig	3.2134e-45	0.5647	249	82	1.17434e-40	Up-regulated
NUDT3	Pig	3.37036e-45	0.758472	342	145	1.2317e-40	Up-regulated
SNX7	Pig	3.59871e-45	0.585161	449	218	1.31515e-40	Up-regulated
PTDSS1	Pig	4.0694e-45	9.36735	83	0	1.48716e-40	Up-regulated
SEPTIN11	Pig	4.29403e-45	1.40078	0.19	51	1.56925e-40	Up-regulated
EFL1	Pig	5.40319e-45	0.913876	264	92	1.9746e-40	Up-regulated
TMTC1	Pig	7.6906e-45	0.975349	326	138	2.81053e-40	Up-regulated
ENSSSCG00000039009	Pig	7.83857e-45	4.85428	97	6	2.86461e-40	Up-regulated
KCNQ5	Pig	9.91807e-45	1.54198	245	88	3.62456e-40	Up-regulated
KCTD9	Pig	1.20895e-44	0.758156	285	106	4.41812e-40	Up-regulated
ZNF697	Pig	1.25912e-44	9.46829	82	0	4.60145e-40	Up-regulated
PIP4K2A	Pig	1.27236e-44	0.63892	371	162	4.64984e-40	Up-regulated
LOXL2	Pig	1.66279e-44	1.03828	369	173	6.07665e-40	Up-regulated
DACT1	Pig	1.68264e-44	1.2675	149	29	6.14921e-40	Up-regulated
SLC25A17	Pig	1.80966e-44	0.694811	0.27	97	6.6134e-40	Up-regulated
WDR41	Pig	1.88373e-44	1.45742	206	61	6.88408e-40	Up-regulated
TPK1	Pig	2.31552e-44	1.69341	0.18	47	8.46208e-40	Up-regulated
DPYSL2	Pig	2.44687e-44	0.670342	432	209	8.94209e-40	Up-regulated
YTHDC1	Pig	2.56038e-44	0.751688	444	215	9.35689e-40	Up-regulated
NARS2	Pig	2.61453e-44	1.06447	209	61	9.55482e-40	Up-regulated
RCBTB1	Pig	2.81911e-44	0.805945	298	115	1.03024e-39	Up-regulated
MIF	Pig	2.85044e-44	3.12846	102	7	1.04169e-39	Up-regulated
PSMA3	Pig	2.99752e-44	1.07542	204	58	1.09544e-39	Up-regulated
BGN	Pig	4.14004e-44	2.46722	106	0.01	1.51298e-39	Up-regulated
RPL31	Pig	4.18412e-44	0.623375	363	161	1.52909e-39	Up-regulated
GPI	Pig	4.55279e-44	1.43512	241	85	1.66382e-39	Up-regulated
FAF1	Pig	7.63423e-44	0.611539	567	0.32	2.78993e-39	Up-regulated
ENSSSCG00000007088	Pig	8.92484e-44	2.09149	136	24	3.26158e-39	Up-regulated
CTIF	Pig	9.50112e-44	0.971155	335	147	3.47218e-39	Up-regulated
PTPA	Pig	9.71978e-44	2.33182	135	23	3.55209e-39	Up-regulated
ZNF146	Pig	1.07218e-43	0.932625	301	119	3.91829e-39	Up-regulated
PRKACB	Pig	1.08623e-43	1.06143	224	73	3.96964e-39	Up-regulated
BAG3	Pig	1.42956e-43	3.48493	105	0.01	5.22433e-39	Up-regulated
PSMB2	Pig	1.44493e-43	0.804322	307	122	5.28051e-39	Up-regulated
ARHGAP35	Pig	1.68969e-43	0.962839	379	178	6.17497e-39	Up-regulated
HSD17B4	Pig	1.83672e-43	1.411	209	64	6.71231e-39	Up-regulated
IMMP1L	Pig	1.84251e-43	1.07241	205	0.06	6.73344e-39	Up-regulated
GCC2	Pig	1.92097e-43	0.686828	359	156	7.02018e-39	Up-regulated
CDK6	Pig	1.93014e-43	0.780873	495	266	7.0537e-39	Up-regulated
VEGFA	Pig	2.11169e-43	9.82499	0.08	0	7.71717e-39	Up-regulated
CLEC16A	Pig	2.39915e-43	1.22135	258	95	8.76769e-39	Up-regulated
GOLM1	Pig	2.50505e-43	1.66351	143	27	9.15471e-39	Up-regulated
CLMN	Pig	3.22996e-43	1.55978	162	37	1.18039e-38	Up-regulated
TPM3	Pig	3.3196e-43	2.53858	126	0.02	1.21315e-38	Up-regulated
BRD8	Pig	3.57291e-43	1.90359	0.16	37	1.30572e-38	Up-regulated
ARFIP1	Pig	3.68292e-43	0.541823	0.38	168	1.34592e-38	Up-regulated
SDC2	Pig	4.09513e-43	0.822499	449	235	1.49657e-38	Up-regulated
TDRD3	Pig	4.35579e-43	0.676328	386	175	1.59182e-38	Up-regulated
PIK3C2A	Pig	4.82182e-43	0.617835	479	245	1.76214e-38	Up-regulated
NMNAT2	Pig	5.01274e-43	2.43244	139	26	1.83191e-38	Up-regulated
GPAT3	Pig	5.4721e-43	3.09036	114	14	1.99978e-38	Up-regulated
ALG14	Pig	5.5225e-43	1.05647	177	45	2.0182e-38	Up-regulated
SUPT3H	Pig	5.58868e-43	0.808859	341	149	2.04238e-38	Up-regulated
PPP2R3C	Pig	5.73027e-43	1.33285	169	0.04	2.09413e-38	Up-regulated
NFIL3	Pig	6.51249e-43	9.68222	79	0	2.37999e-38	Up-regulated
CASP3	Pig	6.94405e-43	1.0984	194	54	2.5377e-38	Up-regulated
ENSSSCG00000036812	Pig	7.31102e-43	1.47087	239	83	2.67181e-38	Up-regulated
FBXO25	Pig	8.06856e-43	3.14493	107	11	2.94866e-38	Up-regulated
SRPX2	Pig	8.09385e-43	1.14521	172	42	2.9579e-38	Up-regulated
TMEM164	Pig	8.48086e-43	2.97745	0.09	4	3.09933e-38	Up-regulated
CD47	Pig	8.70854e-43	0.614521	444	216	3.18254e-38	Up-regulated
ENSSSCG00000016646	Pig	9.23928e-43	2.75542	122	18	3.3765e-38	Up-regulated
ENSSSCG00000005241	Pig	9.90197e-43	4.53027	87	3	3.61868e-38	Up-regulated
PALM2AKAP2	Pig	1.31484e-42	1.19661	239	85	4.80509e-38	Up-regulated
ENSSSCG00000013366	Pig	1.36369e-42	2.3454	106	0.01	4.98359e-38	Up-regulated
DNAJC24	Pig	1.42304e-42	1.52846	0.13	21	5.20051e-38	Up-regulated
EPRS1	Pig	1.5422e-42	0.93698	246	85	5.63598e-38	Up-regulated
KCNK12	Pig	1.96111e-42	5.60305	83	2	7.16688e-38	Up-regulated
APOE	Pig	2.22848e-42	1.93333	111	13	8.14398e-38	Up-regulated
ACTA2	Pig	2.41032e-42	3.02908	104	0.01	8.80853e-38	Up-regulated
ENSSSCG00000007001	Pig	2.53829e-42	2.20565	121	17	9.27618e-38	Up-regulated
CEMIP	Pig	2.72889e-42	6.59653	93	6	9.97273e-38	Up-regulated
ANGPTL2	Pig	3.12847e-42	0.544124	273	101	1.1433e-37	Up-regulated
GRB2	Pig	3.3476e-42	1.25215	201	0.06	1.22338e-37	Up-regulated
XIAP	Pig	3.3933e-42	0.803686	308	125	1.24008e-37	Up-regulated
ZNF326	Pig	3.40595e-42	0.6448	369	164	1.24471e-37	Up-regulated
EED	Pig	3.80109e-42	1.60158	156	35	1.38911e-37	Up-regulated
VCPIP1	Pig	3.98567e-42	2.31336	137	26	1.45656e-37	Up-regulated
MRTFB	Pig	4.01456e-42	0.747365	0.43	221	1.46712e-37	Up-regulated
ENSSSCG00000006418	Pig	4.35612e-42	3.20624	95	7	1.59194e-37	Up-regulated
GOLPH3L	Pig	4.47368e-42	1.8492	145	0.03	1.63491e-37	Up-regulated
ENSSSCG00000009523	Pig	4.47703e-42	2.76037	116	16	1.63613e-37	Up-regulated
GFPT1	Pig	4.64642e-42	1.02757	227	75	1.69803e-37	Up-regulated
ATG5	Pig	4.88026e-42	0.756854	284	109	1.78349e-37	Up-regulated
ENSSSCG00000005453	Pig	5.44304e-42	1.54275	138	26	1.98916e-37	Up-regulated
ARPC5	Pig	5.8633e-42	1.04933	0.19	53	2.14274e-37	Up-regulated
ZFYVE1	Pig	5.88772e-42	1.44623	197	58	2.15167e-37	Up-regulated
YAF2	Pig	5.93515e-42	0.555477	445	218	2.169e-37	Up-regulated
AHCYL2	Pig	7.07016e-42	2.11469	138	27	2.58379e-37	Up-regulated
PPHLN1	Pig	7.7514e-42	0.614791	292	113	2.83275e-37	Up-regulated
MARCHF3	Pig	8.34757e-42	1.37294	291	126	3.05062e-37	Up-regulated
CAB39L	Pig	9.21486e-42	2.26679	152	34	3.36757e-37	Up-regulated
PDSS2	Pig	1.03676e-41	1.02186	186	51	3.78885e-37	Up-regulated
IMMT	Pig	1.2054e-41	1.17929	227	77	4.40515e-37	Up-regulated
CAV1	Pig	1.36257e-41	1.61139	154	35	4.97952e-37	Up-regulated
SLC39A11	Pig	1.56292e-41	0.582083	321	133	5.71168e-37	Up-regulated
FAM204A	Pig	1.57914e-41	0.755522	218	69	5.77095e-37	Up-regulated
CBL	Pig	2.01555e-41	0.780598	316	131	7.36584e-37	Up-regulated
SRGN	Pig	2.0207e-41	3.8004	93	7	7.38464e-37	Up-regulated
SNAP23	Pig	2.09342e-41	1.5007	0.18	0.05	7.65042e-37	Up-regulated
TBC1D5	Pig	2.28465e-41	0.513259	685	432	8.34926e-37	Up-regulated
PRKDC	Pig	2.30286e-41	0.821405	0.29	115	8.41579e-37	Up-regulated
RGS17	Pig	2.56617e-41	4.16663	86	3	9.37807e-37	Up-regulated
TMEM39A	Pig	3.20582e-41	0.757185	259	94	1.17157e-36	Up-regulated
PTGS1	Pig	3.38005e-41	0.590436	266	0.1	1.23524e-36	Up-regulated
EVA1A	Pig	3.50109e-41	3.46778	91	6	1.27948e-36	Up-regulated
PCMT1	Pig	3.51341e-41	0.942699	0.24	84	1.28398e-36	Up-regulated
MOV10	Pig	3.68821e-41	0.982052	176	47	1.34786e-36	Up-regulated
PGD	Pig	3.70629e-41	3.4209	101	0.01	1.35446e-36	Up-regulated
AKR1D1	Pig	4.17362e-41	2.4485	108	13	1.52525e-36	Up-regulated
TRIM44	Pig	4.43474e-41	0.638024	379	175	1.62068e-36	Up-regulated
SLC25A6	Pig	4.50638e-41	2.55716	118	17	1.64686e-36	Up-regulated
ITGA10	Pig	5.54445e-41	1.22507	152	34	2.02622e-36	Up-regulated
TGFBR3	Pig	6.12063e-41	0.519998	848	667	2.23678e-36	Up-regulated
ENSSSCG00000013260	Pig	6.58494e-41	3.56326	86	4	2.40647e-36	Up-regulated
ENSSSCG00000002266	Pig	7.10079e-41	0.606357	533	305	2.59498e-36	Up-regulated
ABCD4	Pig	8.18167e-41	1.89959	136	27	2.98999e-36	Up-regulated
KLHL29	Pig	9.84625e-41	0.589871	326	0.14	3.59831e-36	Up-regulated
SLC9B1	Pig	1.00763e-40	6.59595	79	1	3.68237e-36	Up-regulated
PLXNA2	Pig	1.02374e-40	2.0426	148	33	3.74128e-36	Up-regulated
PIK3AP1	Pig	1.14473e-40	2.28002	144	31	4.18341e-36	Up-regulated
GRK5	Pig	1.14609e-40	1.00046	0.3	129	4.1884e-36	Up-regulated
XPO7	Pig	1.4316e-40	1.17035	269	105	5.23177e-36	Up-regulated
ARPC2	Pig	1.55566e-40	0.705412	0.29	115	5.68517e-36	Up-regulated
PPP2R5E	Pig	1.56891e-40	0.595893	467	239	5.73359e-36	Up-regulated
UBE2B	Pig	1.58338e-40	0.755851	324	138	5.78645e-36	Up-regulated
LARS2	Pig	1.74143e-40	1.65578	181	51	6.36407e-36	Up-regulated
PAFAH1B1	Pig	1.8002e-40	0.607142	569	322	6.57883e-36	Up-regulated
ANKFY1	Pig	2.25556e-40	0.643244	476	245	8.24294e-36	Up-regulated
CAVIN3	Pig	2.92623e-40	1.02547	127	22	1.06939e-35	Up-regulated
DNAJB6	Pig	3.11363e-40	1.29427	202	64	1.13788e-35	Up-regulated
FMOD	Pig	3.13102e-40	1.22738	123	0.02	1.14423e-35	Up-regulated
SORT1	Pig	3.13841e-40	9.33028	74	0	1.14693e-35	Up-regulated
ANKRD50	Pig	3.37729e-40	2.09984	145	32	1.23423e-35	Up-regulated
ENSSSCG00000037274	Pig	3.43473e-40	0.983319	234	82	1.25522e-35	Up-regulated
FAM162A	Pig	3.4738e-40	2.80853	116	17	1.2695e-35	Up-regulated
VPS37A	Pig	3.59002e-40	1.45996	157	38	1.31197e-35	Up-regulated
ATP11C	Pig	4.00033e-40	1.09119	229	81	1.46192e-35	Up-regulated
ARL14EP	Pig	4.14057e-40	1.35626	178	0.05	1.51317e-35	Up-regulated
RAB2A	Pig	4.19095e-40	0.599167	476	247	1.53158e-35	Up-regulated
LMO7	Pig	5.09006e-40	6.63706	75	0	1.86016e-35	Up-regulated
ABCC1	Pig	6.24201e-40	3.06232	107	14	2.28114e-35	Up-regulated
EFR3A	Pig	6.61816e-40	0.699513	311	129	2.41861e-35	Up-regulated
ENSSSCG00000016823	Pig	8.3988e-40	2.30184	92	7	3.06934e-35	Up-regulated
ETV7	Pig	8.50335e-40	3.85849	85	4	3.10755e-35	Up-regulated
PRSS55	Pig	9.01442e-40	0.587377	421	205	3.29432e-35	Up-regulated
SSBP2	Pig	9.38468e-40	0.548713	696	459	3.42963e-35	Up-regulated
ERP44	Pig	1.02541e-39	0.625621	0.3	122	3.74737e-35	Up-regulated
SCAMP1	Pig	1.14872e-39	0.747308	255	94	4.198e-35	Up-regulated
PRKCA	Pig	1.26705e-39	1.6694	0.17	47	4.63043e-35	Up-regulated
DST	Pig	1.52321e-39	0.607032	818	0.62	5.56656e-35	Up-regulated
TRAPPC13	Pig	1.59202e-39	2.25505	109	14	5.81804e-35	Up-regulated
ITGBL1	Pig	1.82665e-39	1.01505	258	101	6.67548e-35	Up-regulated
XKR6	Pig	1.88093e-39	1.6214	172	48	6.87385e-35	Up-regulated
IL13RA1	Pig	1.8904e-39	1.35161	0.21	0.07	6.90848e-35	Up-regulated
PANK1	Pig	2.0568e-39	5.55017	79	2	7.51657e-35	Up-regulated
PRRC1	Pig	2.43793e-39	0.816718	272	106	8.90942e-35	Up-regulated
AGL	Pig	2.62697e-39	3.64987	93	8	9.60027e-35	Up-regulated
CANX	Pig	2.749e-39	0.700904	262	99	1.00462e-34	Up-regulated
XRCC5	Pig	2.81906e-39	0.661953	368	169	1.03023e-34	Up-regulated
TRIQK	Pig	3.02395e-39	0.590041	0.19	57	1.1051e-34	Up-regulated
ANPEP	Pig	3.17849e-39	3.22902	88	6	1.16158e-34	Up-regulated
NAMPT	Pig	3.2262e-39	0.819864	258	98	1.17901e-34	Up-regulated
ENSSSCG00000041465	Pig	3.46067e-39	0.762602	231	81	1.2647e-34	Up-regulated
ZNF16	Pig	3.56197e-39	0.96694	0.26	0.1	1.30172e-34	Up-regulated
NUP37	Pig	3.66312e-39	1.63582	157	0.04	1.33869e-34	Up-regulated
MAN1A1	Pig	4.13315e-39	1.06699	207	68	1.51046e-34	Up-regulated
MFRP	Pig	4.64103e-39	3.12455	86	5	1.69607e-34	Up-regulated
ZNF148	Pig	4.99981e-39	0.512516	464	233	1.82718e-34	Up-regulated
EXOC5	Pig	5.64673e-39	0.695583	0.35	158	2.0636e-34	Up-regulated
TOM1	Pig	5.75783e-39	1.3842	179	51	2.1042e-34	Up-regulated
PTP4A2	Pig	6.244e-39	0.726178	341	153	2.28187e-34	Up-regulated
JKAMP	Pig	7.38442e-39	1.88349	113	17	2.69864e-34	Up-regulated
EXOC1	Pig	7.72361e-39	0.728446	324	141	2.82259e-34	Up-regulated
PRKAR1A	Pig	7.88617e-39	1.15264	0.2	64	2.882e-34	Up-regulated
ICAM2	Pig	9.46327e-39	1.2763	187	56	3.45835e-34	Up-regulated
PPME1	Pig	1.0112e-38	1.43449	187	57	3.69543e-34	Up-regulated
LEF1	Pig	1.04683e-38	4.14361	83	4	3.82563e-34	Up-regulated
KCNJ8	Pig	1.08664e-38	1.89596	141	31	3.97114e-34	Up-regulated
N6AMT1	Pig	1.13682e-38	1.45809	208	0.07	4.15449e-34	Up-regulated
PANK2	Pig	1.23133e-38	1.53163	167	45	4.4999e-34	Up-regulated
ENSSSCG00000012202	Pig	1.29874e-38	7.89096	72	0	4.74625e-34	Up-regulated
C4A	Pig	1.29879e-38	2.50176	98	0.01	4.74642e-34	Up-regulated
IP6K1	Pig	1.30859e-38	0.866541	0.42	212	4.78225e-34	Up-regulated
ATP8B1	Pig	1.40711e-38	1.45724	166	46	5.14229e-34	Up-regulated
ERCC6	Pig	1.4221e-38	2.51966	0.11	16	5.19708e-34	Up-regulated
DHX57	Pig	1.56894e-38	1.20797	162	42	5.7337e-34	Up-regulated
PRKD3	Pig	1.65576e-38	0.648533	418	205	6.05096e-34	Up-regulated
PPP2R5C	Pig	1.70154e-38	0.954292	327	149	6.21828e-34	Up-regulated
HDAC1	Pig	1.80191e-38	1.93027	126	24	6.58508e-34	Up-regulated
P3H1	Pig	1.80816e-38	0.899463	245	91	6.60791e-34	Up-regulated
FOXK1	Pig	1.92567e-38	1.07242	239	88	7.03737e-34	Up-regulated
HSD11B1L	Pig	1.96749e-38	1.04255	184	54	7.19018e-34	Up-regulated
SDHC	Pig	1.974e-38	2.75315	0.11	17	7.21398e-34	Up-regulated
MAP3K5	Pig	2.13769e-38	1.5933	188	0.06	7.8122e-34	Up-regulated
STAG2	Pig	2.40653e-38	0.686074	0.4	198	8.79467e-34	Up-regulated
TMEM165	Pig	2.50185e-38	1.5369	139	0.03	9.14301e-34	Up-regulated
SIL1	Pig	2.61099e-38	0.813775	218	74	9.54186e-34	Up-regulated
MXD1	Pig	3.07097e-38	2.06608	129	26	1.12228e-33	Up-regulated
SMYD2	Pig	3.13164e-38	3.47217	92	8	1.14446e-33	Up-regulated
MED13	Pig	3.53616e-38	0.544331	0.55	304	1.29229e-33	Up-regulated
CCDC180	Pig	4.16353e-38	0.705499	196	62	1.52156e-33	Up-regulated
GOLPH3	Pig	4.69556e-38	0.843937	228	0.08	1.71599e-33	Up-regulated
3,00 DKK	Pig	4.90428e-38	0.941703	236	86	1.79227e-33	Up-regulated
LPIN2	Pig	5.10607e-38	2.86866	101	13	1.86601e-33	Up-regulated
TUBA1B	Pig	5.14368e-38	0.814675	0.19	57	1.87976e-33	Up-regulated
NSUN3	Pig	5.19451e-38	1.54521	152	37	1.89833e-33	Up-regulated
SNX6	Pig	5.30294e-38	0.941837	237	88	1.93796e-33	Up-regulated
GAPDH	Pig	5.31151e-38	2.90415	97	0.01	1.94109e-33	Up-regulated
BZW2	Pig	5.57106e-38	2.23885	117	0.02	2.03594e-33	Up-regulated
PLPP5	Pig	5.58963e-38	2.54673	88	7	2.04273e-33	Up-regulated
ASH1L	Pig	5.73625e-38	0.595342	703	455	2.09631e-33	Up-regulated
DDX21	Pig	6.30657e-38	1.01955	175	0.05	2.30474e-33	Up-regulated
BROX	Pig	6.32711e-38	1.88031	145	34	2.31224e-33	Up-regulated
SELENOF	Pig	6.71809e-38	1.10183	152	37	2.45513e-33	Up-regulated
EGR2	Pig	7.2352e-38	2.56055	86	6	2.6441e-33	Up-regulated
GLUD1	Pig	7.32068e-38	1.47578	137	0.03	2.67534e-33	Up-regulated
CCDC191	Pig	7.63869e-38	1.11831	202	66	2.79156e-33	Up-regulated
ITGA1	Pig	1.04115e-37	1.405	153	39	3.80487e-33	Up-regulated
HERPUD1	Pig	1.31575e-37	1.03048	215	74	4.8084e-33	Up-regulated
ACSS3	Pig	1.41125e-37	1.02453	405	226	5.1574e-33	Up-regulated
ENSSSCG00000008222	Pig	1.46547e-37	1.07772	214	74	5.35555e-33	Up-regulated
RPLP0	Pig	1.48925e-37	1.37198	135	29	5.44248e-33	Up-regulated
SEC22B	Pig	1.49064e-37	0.688605	197	62	5.44753e-33	Up-regulated
PSMD11	Pig	1.50226e-37	1.71457	135	29	5.49e-33	Up-regulated
RPL15	Pig	1.5264e-37	0.987507	154	38	5.57822e-33	Up-regulated
SGCD	Pig	1.89016e-37	2.80227	83	5	6.90759e-33	Up-regulated
RMND5A	Pig	1.92658e-37	1.65977	162	45	7.04069e-33	Up-regulated
PROS1	Pig	2.30305e-37	1.30266	184	57	8.4165e-33	Up-regulated
PTPN21	Pig	2.3376e-37	0.912339	269	0.11	8.54274e-33	Up-regulated
STOM	Pig	2.34832e-37	2.66774	108	17	8.58194e-33	Up-regulated
NSMAF	Pig	2.61272e-37	2.08597	133	29	9.54819e-33	Up-regulated
FCHSD2	Pig	2.8426e-37	1.01108	244	95	1.03883e-32	Up-regulated
TLR3	Pig	2.99788e-37	4.18156	78	3	1.09557e-32	Up-regulated
KCTD1	Pig	3.40061e-37	4.95027	74	2	1.24275e-32	Up-regulated
SLC16A1	Pig	3.54191e-37	3.49535	87	7	1.29439e-32	Up-regulated
DGKB	Pig	3.92828e-37	2.01785	139	33	1.43559e-32	Up-regulated
ENSSSCG00000039582	Pig	4.44801e-37	0.790813	189	58	1.62552e-32	Up-regulated
BTBD10	Pig	4.91496e-37	0.730329	213	73	1.79617e-32	Up-regulated
SMCHD1	Pig	6.04345e-37	0.596963	452	234	2.20858e-32	Up-regulated
RGS22	Pig	6.40233e-37	1.40064	148	37	2.33973e-32	Up-regulated
TRMT11	Pig	6.97477e-37	1.11554	176	51	2.54893e-32	Up-regulated
ADNP	Pig	7.28011e-37	0.630041	312	135	2.66052e-32	Up-regulated
PLEKHA5	Pig	7.30164e-37	0.588218	648	418	2.66838e-32	Up-regulated
TXNIP	Pig	7.52407e-37	0.563714	516	302	2.74967e-32	Up-regulated
ENSSSCG00000033786	Pig	8.11183e-37	0.73529	205	67	2.96447e-32	Up-regulated
ENSSSCG00000043835	Pig	8.26706e-37	3.6808	79	4	3.0212e-32	Up-regulated
RCHY1	Pig	8.6021e-37	1.36837	167	47	3.14364e-32	Up-regulated
ENSSSCG00000014909	Pig	8.89249e-37	1.92114	118	22	3.24976e-32	Up-regulated
MCU	Pig	8.94355e-37	0.765531	301	131	3.26842e-32	Up-regulated
TTC39C	Pig	1.00297e-36	2.58415	93	0.01	3.66537e-32	Up-regulated
C6orf62	Pig	1.04734e-36	1.34581	182	57	3.82752e-32	Up-regulated
ENSSSCG00000010172	Pig	1.06622e-36	1.18944	222	83	3.89652e-32	Up-regulated
SRPRB	Pig	1.0698e-36	1.01968	153	39	3.90958e-32	Up-regulated
TMEM241	Pig	1.13127e-36	2.7523	93	0.01	4.13424e-32	Up-regulated
GRK3	Pig	1.21689e-36	4.08429	78	4	4.44713e-32	Up-regulated
BIRC3	Pig	1.21995e-36	0.886584	282	0.12	4.45831e-32	Up-regulated
RALBP1	Pig	1.27625e-36	0.688397	257	101	4.66407e-32	Up-regulated
KPNA3	Pig	1.48523e-36	1.26135	222	83	5.42778e-32	Up-regulated
AGPAT3	Pig	1.50498e-36	1.45173	194	64	5.49994e-32	Up-regulated
MALT1	Pig	1.61147e-36	7.30542	69	1	5.88912e-32	Up-regulated
TIA1	Pig	1.73924e-36	0.696067	353	165	6.35606e-32	Up-regulated
SAV1	Pig	1.76496e-36	2.70058	102	14	6.45005e-32	Up-regulated
PAWR	Pig	1.82559e-36	1.56692	125	25	6.67161e-32	Up-regulated
LPIN1	Pig	1.86386e-36	2.86075	102	14	6.81148e-32	Up-regulated
GPBP1L1	Pig	1.89162e-36	0.872955	237	0.09	6.91293e-32	Up-regulated
SEC61A1	Pig	1.92738e-36	1.15037	151	38	7.0436e-32	Up-regulated
IPO7	Pig	2.03746e-36	0.648276	269	109	7.44588e-32	Up-regulated
RBM15	Pig	2.05753e-36	1.49856	128	27	7.51924e-32	Up-regulated
EZR	Pig	2.20085e-36	6.59403	68	0	8.04301e-32	Up-regulated
ENSSSCG00000031661	Pig	2.25822e-36	4.3706	75	3	8.25266e-32	Up-regulated
TYMS	Pig	2.49773e-36	4.28958	72	2	9.12796e-32	Up-regulated
AUH	Pig	2.50384e-36	0.601967	477	266	9.15028e-32	Up-regulated
DNAJB1	Pig	2.82049e-36	3.06004	89	9	1.03075e-31	Up-regulated
TXNL1	Pig	2.96926e-36	1.37063	174	53	1.08511e-31	Up-regulated
ID2	Pig	2.97587e-36	2.40513	82	6	1.08753e-31	Up-regulated
ACCSL	Pig	3.05266e-36	0.816362	206	0.07	1.11559e-31	Up-regulated
MRAS	Pig	3.15517e-36	6.04423	69	1	1.15306e-31	Up-regulated
IFTAP	Pig	3.37358e-36	2.3922	105	16	1.23288e-31	Up-regulated
FLI1	Pig	3.81152e-36	1.54307	169	0.05	1.39292e-31	Up-regulated
PSME4	Pig	4.23446e-36	0.513748	549	322	1.54748e-31	Up-regulated
RPS6KC1	Pig	4.26326e-36	0.503273	458	238	1.55801e-31	Up-regulated
SYNJ1	Pig	4.73287e-36	0.849668	222	81	1.72963e-31	Up-regulated
PMAIP1	Pig	5.18914e-36	3.88222	76	3	1.89637e-31	Up-regulated
DROSHA	Pig	5.7938e-36	0.546517	229	83	2.11734e-31	Up-regulated
OXR1	Pig	6.46235e-36	1.18432	209	74	2.36167e-31	Up-regulated
FHL1	Pig	7.02438e-36	1.29399	0.19	64	2.56706e-31	Up-regulated
SHPRH	Pig	7.08633e-36	0.686283	239	0.09	2.5897e-31	Up-regulated
HSP90B1	Pig	7.11197e-36	0.849095	187	59	2.59907e-31	Up-regulated
ATP10D	Pig	7.37297e-36	0.68846	268	0.11	2.69445e-31	Up-regulated
XPNPEP1	Pig	8.0128e-36	0.530936	215	75	2.92828e-31	Up-regulated
MFF	Pig	8.38883e-36	0.851096	245	95	3.0657e-31	Up-regulated
INTS9	Pig	8.44513e-36	0.968531	164	47	3.08627e-31	Up-regulated
FGD6	Pig	8.72048e-36	5.38588	69	1	3.1869e-31	Up-regulated
UFM1	Pig	8.85653e-36	0.501094	0.24	92	3.23662e-31	Up-regulated
COL16A1	Pig	9.07879e-36	0.606371	258	102	3.31784e-31	Up-regulated
ZNHIT6	Pig	1.02343e-35	0.516082	379	182	3.74012e-31	Up-regulated
PCDH19	Pig	1.02504e-35	0.955843	164	47	3.74601e-31	Up-regulated
IARS1	Pig	1.05043e-35	0.514236	425	219	3.83879e-31	Up-regulated
ALDH1L2	Pig	1.06535e-35	0.762578	224	82	3.89333e-31	Up-regulated
DERL1	Pig	1.28106e-35	1.33099	184	0.06	4.68162e-31	Up-regulated
AKIRIN1	Pig	1.359e-35	1.28328	158	44	4.96645e-31	Up-regulated
SPEN	Pig	1.39508e-35	0.801141	416	216	5.09832e-31	Up-regulated
ENPEP	Pig	1.58501e-35	1.09837	164	47	5.79241e-31	Up-regulated
SQSTM1	Pig	1.60751e-35	0.829553	241	93	5.87463e-31	Up-regulated
UBE2W	Pig	1.70395e-35	0.753571	303	135	6.22707e-31	Up-regulated
S100A11	Pig	1.81789e-35	1.11583	121	24	6.64347e-31	Up-regulated
INPP1	Pig	1.84951e-35	2.6875	95	12	6.75904e-31	Up-regulated
NAV2	Pig	2.03931e-35	0.802891	521	331	7.45266e-31	Up-regulated
DCTN4	Pig	2.11792e-35	0.575815	288	123	7.73996e-31	Up-regulated
HMG20A	Pig	2.19822e-35	0.802661	233	88	8.03341e-31	Up-regulated
STC2	Pig	2.20887e-35	8.90779	65	0	8.07231e-31	Up-regulated
SLC12A6	Pig	2.25959e-35	1.27227	203	73	8.25768e-31	Up-regulated
N4BP1	Pig	2.30982e-35	0.829228	296	0.13	8.44124e-31	Up-regulated
ZMYM6	Pig	2.3267e-35	0.51917	264	107	8.50291e-31	Up-regulated
C11orf49	Pig	2.54698e-35	0.854639	176	54	9.30793e-31	Up-regulated
TMEM59	Pig	2.63903e-35	1.06203	176	54	9.64432e-31	Up-regulated
FAM91A1	Pig	2.68333e-35	1.17484	198	67	9.80623e-31	Up-regulated
DPP7	Pig	2.85884e-35	1.47099	147	38	1.04476e-30	Up-regulated
ENSSSCG00000009072	Pig	2.94931e-35	1.57687	134	31	1.07782e-30	Up-regulated
MPPED2	Pig	3.0558e-35	3.41387	95	13	1.11674e-30	Up-regulated
TET2	Pig	3.13521e-35	0.739513	359	177	1.14576e-30	Up-regulated
TCAF1	Pig	3.21148e-35	4.51005	73	3	1.17364e-30	Up-regulated
ABL2	Pig	3.41949e-35	0.879098	301	135	1.24965e-30	Up-regulated
IKBKB	Pig	3.62139e-35	1.23741	178	57	1.32344e-30	Up-regulated
RNF11	Pig	3.66016e-35	1.23382	166	49	1.33761e-30	Up-regulated
METAP1D	Pig	3.88026e-35	1.81764	137	34	1.41804e-30	Up-regulated
ANKRD42	Pig	3.9086e-35	1.07153	188	61	1.4284e-30	Up-regulated
IRS1	Pig	4.96439e-35	1.21504	208	75	1.81424e-30	Up-regulated
PPARA	Pig	4.96617e-35	2.73181	102	16	1.81489e-30	Up-regulated
GLB1	Pig	5.25179e-35	2.80292	98	14	1.91927e-30	Up-regulated
RIPK2	Pig	5.30638e-35	0.784367	236	0.09	1.93922e-30	Up-regulated
UGCG	Pig	5.68441e-35	2.43765	108	19	2.07737e-30	Up-regulated
NAA16	Pig	5.95158e-35	0.711458	269	111	2.17501e-30	Up-regulated
RAB5A	Pig	6.2418e-35	0.870052	226	84	2.28107e-30	Up-regulated
PLK2	Pig	6.25871e-35	5.17522	71	3	2.28724e-30	Up-regulated
MAP2K1	Pig	6.60669e-35	1.28911	152	41	2.41441e-30	Up-regulated
RPS3	Pig	6.88609e-35	0.928661	171	51	2.51652e-30	Up-regulated
LAMP2	Pig	7.11767e-35	0.572734	249	98	2.60115e-30	Up-regulated
DEPTOR	Pig	7.52772e-35	1.26302	198	69	2.751e-30	Up-regulated
IRF7	Pig	7.95939e-35	3.83484	71	3	2.90876e-30	Up-regulated
GNPTAB	Pig	8.90676e-35	0.668973	234	0.09	3.25497e-30	Up-regulated
ELP3	Pig	9.98408e-35	1.11738	0.16	45	3.64868e-30	Up-regulated
SMAD7	Pig	1.0059e-34	0.878156	159	45	3.67607e-30	Up-regulated
BNIP3	Pig	1.13007e-34	1.6261	0.17	53	4.12983e-30	Up-regulated
SERTAD4	Pig	1.16934e-34	9.2894	64	0	4.27334e-30	Up-regulated
EPB41L4A	Pig	1.25701e-34	0.913802	205	73	4.59373e-30	Up-regulated
RHOBTB1	Pig	1.38198e-34	2.67645	98	14	5.05045e-30	Up-regulated
EXTL3	Pig	1.39331e-34	3.16957	82	7	5.09185e-30	Up-regulated
LAPTM4A	Pig	1.42145e-34	0.665267	203	0.07	5.19467e-30	Up-regulated
SLC22A15	Pig	1.49832e-34	1.17568	234	92	5.4756e-30	Up-regulated
DISP1	Pig	1.53388e-34	0.539077	0.58	352	5.60555e-30	Up-regulated
PEX14	Pig	1.58889e-34	0.784556	215	78	5.8066e-30	Up-regulated
AKR1B1	Pig	1.74751e-34	0.790891	212	76	6.38626e-30	Up-regulated
KIAA0319L	Pig	1.79282e-34	0.64457	299	132	6.55187e-30	Up-regulated
PRR14L	Pig	1.87331e-34	0.643212	294	128	6.846e-30	Up-regulated
ZNF462	Pig	1.87555e-34	0.690233	419	225	6.85421e-30	Up-regulated
KIF12	Pig	1.89324e-34	6.54144	65	0	6.91885e-30	Up-regulated
PCCB	Pig	2.12415e-34	0.705896	179	57	7.76269e-30	Up-regulated
ACER3	Pig	2.13471e-34	0.749184	531	0.32	7.80131e-30	Up-regulated
ENSSSCG00000022295	Pig	2.16534e-34	1.34857	0.15	41	7.91322e-30	Up-regulated
INTS13	Pig	2.18578e-34	4.2543	73	3	7.98793e-30	Up-regulated
DAPK3	Pig	2.24652e-34	3.09944	0.09	11	8.20992e-30	Up-regulated
ENSSSCG00000038594	Pig	2.47375e-34	4.28182	0.08	7	9.04031e-30	Up-regulated
CALCOCO2	Pig	2.91007e-34	0.662572	324	0.15	1.06348e-29	Up-regulated
RPS6KA3	Pig	2.94152e-34	0.759986	291	129	1.07498e-29	Up-regulated
SLC9B2	Pig	2.98379e-34	7.53248	64	0	1.09042e-29	Up-regulated
ALDH18A1	Pig	3.05133e-34	1.08018	173	54	1.11511e-29	Up-regulated
TEAD4	Pig	3.07059e-34	7.38184	64	0	1.12215e-29	Up-regulated
FLNB	Pig	3.35042e-34	3.54359	83	8	1.22441e-29	Up-regulated
ENSSSCG00000015011	Pig	3.40391e-34	0.749806	224	84	1.24396e-29	Up-regulated
TRIT1	Pig	3.58219e-34	1.0335	206	74	1.30911e-29	Up-regulated
PLAT	Pig	4.58779e-34	1.24213	114	22	1.67661e-29	Up-regulated
TBC1D8B	Pig	4.61785e-34	0.716254	159	46	1.68759e-29	Up-regulated
ANKHD1	Pig	5.12013e-34	0.507696	545	316	1.87115e-29	Up-regulated
ZNF385D	Pig	5.55459e-34	0.723194	209	77	2.02993e-29	Up-regulated
DENND1B	Pig	5.6973e-34	0.730428	331	155	2.08208e-29	Up-regulated
HSPH1	Pig	5.92668e-34	1.13552	0.12	25	2.1659e-29	Up-regulated
ENSSSCG00000012262	Pig	6.9913e-34	0.505832	493	277	2.55497e-29	Up-regulated
MINPP1	Pig	7.37329e-34	2.03886	111	21	2.69457e-29	Up-regulated
RETREG3	Pig	7.42982e-34	1.62732	127	29	2.71523e-29	Up-regulated
NDUFS4	Pig	7.78956e-34	0.766143	257	107	2.8467e-29	Up-regulated
CTNNBL1	Pig	8.20751e-34	0.706788	0.28	121	2.99943e-29	Up-regulated
ENSSSCG00000043930	Pig	8.4698e-34	1.65161	153	44	3.09529e-29	Up-regulated
ARMH3	Pig	8.55021e-34	0.693599	295	131	3.12467e-29	Up-regulated
SEC13	Pig	1.00336e-33	0.593529	239	94	3.66678e-29	Up-regulated
ARHGAP31	Pig	1.02517e-33	0.928865	208	75	3.74649e-29	Up-regulated
SLCO5A1	Pig	1.07555e-33	8.87401	62	0	3.93058e-29	Up-regulated
PUS10	Pig	1.13365e-33	1.08501	174	55	4.14294e-29	Up-regulated
EMSY	Pig	1.14292e-33	1.02701	211	78	4.1768e-29	Up-regulated
FNIP2	Pig	1.18513e-33	1.02825	249	103	4.33107e-29	Up-regulated
CCDC126	Pig	1.18718e-33	1.44717	111	0.02	4.33856e-29	Up-regulated
RHOD	Pig	1.21113e-33	4.202	71	3	4.42606e-29	Up-regulated
HNMT	Pig	1.26683e-33	0.524819	219	83	4.62962e-29	Up-regulated
GTF2A1L	Pig	1.36748e-33	0.564684	245	98	4.99745e-29	Up-regulated
HSPA5	Pig	1.37981e-33	1.51215	128	0.03	5.04253e-29	Up-regulated
LY96	Pig	1.40058e-33	2.41958	0.09	11	5.11843e-29	Up-regulated
TMED10	Pig	1.40529e-33	0.607157	231	88	5.13562e-29	Up-regulated
NMI	Pig	1.4105e-33	0.966333	157	45	5.15468e-29	Up-regulated
ENSSSCG00000027907	Pig	1.61015e-33	5.1775	66	2	5.88429e-29	Up-regulated
RAD52	Pig	1.72217e-33	0.782872	227	88	6.29365e-29	Up-regulated
TMEM106C	Pig	1.86298e-33	1.59652	121	27	6.80824e-29	Up-regulated
ERAP1	Pig	2.01678e-33	2.60399	89	11	7.37033e-29	Up-regulated
UBAP1	Pig	2.05545e-33	0.776763	231	0.09	7.51163e-29	Up-regulated
NCK2	Pig	2.0836e-33	0.945821	211	78	7.61453e-29	Up-regulated
CBX5	Pig	2.08961e-33	0.796696	159	46	7.63646e-29	Up-regulated
NUDT6	Pig	2.18206e-33	0.876713	237	95	7.97435e-29	Up-regulated
AP4E1	Pig	2.42901e-33	0.919516	181	0.06	8.87683e-29	Up-regulated
ACSL1	Pig	2.48076e-33	6.09845	64	1	9.06595e-29	Up-regulated
LMCD1	Pig	2.93466e-33	3.87853	69	3	1.07247e-28	Up-regulated
VLDLR	Pig	2.94825e-33	3.19047	89	11	1.07744e-28	Up-regulated
CWF19L2	Pig	3.17365e-33	0.559213	242	96	1.15981e-28	Up-regulated
TMTC2	Pig	3.58391e-33	1.27564	373	205	1.30974e-28	Up-regulated
FKBP15	Pig	3.68569e-33	1.20948	188	65	1.34694e-28	Up-regulated
PSMA5	Pig	3.81507e-33	1.58578	115	24	1.39422e-28	Up-regulated
ENTPD7	Pig	3.82381e-33	0.795074	127	0.03	1.39741e-28	Up-regulated
ENSSSCG00000006324	Pig	3.9943e-33	1.47457	132	33	1.45972e-28	Up-regulated
PTPN2	Pig	4.25038e-33	0.677598	248	101	1.5533e-28	Up-regulated
ADH5	Pig	4.50251e-33	1.65337	111	22	1.64544e-28	Up-regulated
VPS50	Pig	4.50427e-33	0.553581	287	126	1.64609e-28	Up-regulated
ARSK	Pig	4.57522e-33	2.93179	75	5	1.67201e-28	Up-regulated
SLC35A5	Pig	4.62281e-33	1.33822	126	0.03	1.68941e-28	Up-regulated
SLC39A10	Pig	4.70719e-33	1.33288	155	46	1.72024e-28	Up-regulated
TMEM26	Pig	4.80207e-33	3.46986	74	5	1.75492e-28	Up-regulated
NFKB1	Pig	5.73266e-33	0.512396	339	162	2.095e-28	Up-regulated
USP53	Pig	5.8399e-33	0.803781	399	217	2.13419e-28	Up-regulated
WIPI1	Pig	6.06992e-33	0.784163	247	101	2.21825e-28	Up-regulated
TMEM245	Pig	6.35406e-33	0.603405	325	154	2.32209e-28	Up-regulated
NECAB1	Pig	8.21534e-33	0.604337	217	83	3.00229e-28	Up-regulated
HIBCH	Pig	8.27133e-33	1.9805	109	21	3.02276e-28	Up-regulated
SLC8A1	Pig	8.32182e-33	0.852915	251	0.11	3.04121e-28	Up-regulated
SUCLG1	Pig	9.80862e-33	1.01979	204	75	3.58456e-28	Up-regulated
ENSSSCG00000021200	Pig	9.89267e-33	0.542626	327	154	3.61528e-28	Up-regulated
ACSS2	Pig	1.04209e-32	2.65747	93	14	3.80833e-28	Up-regulated
ASXL1	Pig	1.19212e-32	0.692927	279	122	4.35659e-28	Up-regulated
HSP90AB1	Pig	1.23801e-32	1.95987	101	17	4.52432e-28	Up-regulated
ENSSSCG00000013318	Pig	1.27064e-32	0.813202	155	45	4.64355e-28	Up-regulated
SORCS2	Pig	1.37486e-32	3.11644	78	7	5.02443e-28	Up-regulated
ZC3H14	Pig	1.83109e-32	0.540246	296	132	6.69173e-28	Up-regulated
NR2C2	Pig	1.88185e-32	0.732728	273	119	6.87723e-28	Up-regulated
ENSSSCG00000033987	Pig	1.96487e-32	0.782101	243	99	7.18061e-28	Up-regulated
SELENOI	Pig	1.96601e-32	5.51976	63	1	7.1848e-28	Up-regulated
LRIG1	Pig	2.0562e-32	0.753947	301	145	7.51438e-28	Up-regulated
TARBP1	Pig	2.1021e-32	0.655784	0.21	78	7.68214e-28	Up-regulated
GOLGA3	Pig	2.14148e-32	0.690001	208	77	7.82602e-28	Up-regulated
MTREX	Pig	2.19364e-32	0.555072	331	156	8.01666e-28	Up-regulated
ANKRD10	Pig	2.30805e-32	0.602717	467	263	8.43478e-28	Up-regulated
IL17D	Pig	2.32558e-32	0.516312	237	96	8.49882e-28	Up-regulated
PEX7	Pig	2.5088e-32	0.734011	172	56	9.16839e-28	Up-regulated
UEVLD	Pig	2.83485e-32	1.04841	174	57	1.036e-27	Up-regulated
ZFYVE9	Pig	2.86537e-32	0.580478	444	243	1.04715e-27	Up-regulated
COL18A1	Pig	3.0359e-32	2.98588	86	11	1.10947e-27	Up-regulated
MORF4L2	Pig	3.07567e-32	0.801313	206	76	1.12401e-27	Up-regulated
KLF3	Pig	4.1639e-32	0.669464	251	106	1.5217e-27	Up-regulated
BTG1	Pig	4.73924e-32	1.37777	132	34	1.73195e-27	Up-regulated
WDR48	Pig	5.33606e-32	0.983594	199	72	1.95006e-27	Up-regulated
LRRC17	Pig	5.62666e-32	1.23594	144	0.04	2.05626e-27	Up-regulated
NAPEPLD	Pig	6.53052e-32	2.524	91	13	2.38658e-27	Up-regulated
DHX58	Pig	6.88151e-32	3.74655	68	3	2.51485e-27	Up-regulated
OSTC	Pig	7.65571e-32	1.60089	92	13	2.79778e-27	Up-regulated
GOSR1	Pig	8.1461e-32	0.691376	251	105	2.97699e-27	Up-regulated
H2AJ	Pig	8.4986e-32	1.40876	108	21	3.10581e-27	Up-regulated
TTF2	Pig	8.66331e-32	1.30354	127	31	3.16601e-27	Up-regulated
EGLN3	Pig	9.00486e-32	9.25917	58	0	3.29082e-27	Up-regulated
PRUNE1	Pig	9.00486e-32	8.92906	58	0	3.29083e-27	Up-regulated
ENSSSCG00000025224	Pig	1.0181e-31	2.72621	88	12	3.72066e-27	Up-regulated
SCYL2	Pig	1.06831e-31	0.688395	187	65	3.90413e-27	Up-regulated
CCDC88A	Pig	1.14957e-31	0.538378	334	163	4.20109e-27	Up-regulated
TAB2	Pig	1.208e-31	0.543788	297	134	4.41464e-27	Up-regulated
HIPK2	Pig	1.22394e-31	0.758402	196	71	4.47289e-27	Up-regulated
NT5DC1	Pig	1.22616e-31	0.919692	175	59	4.48102e-27	Up-regulated
IP6K2	Pig	1.46206e-31	0.945919	142	0.04	5.34308e-27	Up-regulated
ABRAXAS2	Pig	1.48556e-31	2.59517	92	14	5.42897e-27	Up-regulated
TMEM120B	Pig	1.52239e-31	5.03887	65	3	5.56358e-27	Up-regulated
STK10	Pig	1.58086e-31	1.00874	182	64	5.77725e-27	Up-regulated
ORC3	Pig	1.62752e-31	0.632462	224	88	5.94776e-27	Up-regulated
MICU1	Pig	1.64463e-31	0.675257	0.31	147	6.01029e-27	Up-regulated
ENSSSCG00000016755	Pig	1.6573e-31	0.970099	171	57	6.05661e-27	Up-regulated
CTNNB1	Pig	1.84036e-31	0.546766	347	173	6.72561e-27	Up-regulated
TNFAIP8	Pig	2.04185e-31	3.52415	79	8	7.46194e-27	Up-regulated
VWA8	Pig	2.12224e-31	0.797796	218	86	7.75573e-27	Up-regulated
MGAT4A	Pig	2.214e-31	2.21515	86	11	8.09108e-27	Up-regulated
S100A10	Pig	2.22189e-31	0.844301	126	31	8.11989e-27	Up-regulated
GYG2	Pig	2.55249e-31	2.07964	111	24	9.32809e-27	Up-regulated
CALCOCO1	Pig	2.63451e-31	2.79432	99	18	9.62782e-27	Up-regulated
SLC7A11	Pig	2.71803e-31	9.39983	57	0	9.93306e-27	Up-regulated
DAB2IP	Pig	2.86642e-31	1.73735	142	41	1.04753e-26	Up-regulated
SMG7	Pig	3.1012e-31	0.597584	248	104	1.13333e-26	Up-regulated
VOPP1	Pig	3.17919e-31	1.3621	162	52	1.16183e-26	Up-regulated
PHACTR4	Pig	3.22568e-31	0.581737	302	142	1.17882e-26	Up-regulated
ENSSSCG00000033089	Pig	3.24013e-31	1.80099	93	15	1.1841e-26	Up-regulated
UXS1	Pig	3.44851e-31	1.26802	0.15	45	1.26026e-26	Up-regulated
ARFGEF2	Pig	3.87595e-31	0.956743	229	96	1.41647e-26	Up-regulated
RILPL1	Pig	3.88583e-31	2.46923	94	16	1.42008e-26	Up-regulated
MAGT1	Pig	4.64188e-31	0.544335	259	112	1.69637e-26	Up-regulated
MSH3	Pig	5.03172e-31	0.747641	202	76	1.83884e-26	Up-regulated
PHF6	Pig	5.05451e-31	1.17235	133	35	1.84717e-26	Up-regulated
ALG6	Pig	5.13426e-31	0.833105	192	69	1.87632e-26	Up-regulated
EIF3A	Pig	5.17957e-31	0.604375	242	0.1	1.89287e-26	Up-regulated
ENOX2	Pig	5.28192e-31	0.821804	134	35	1.93028e-26	Up-regulated
FMNL3	Pig	5.96766e-31	0.538803	258	113	2.18088e-26	Up-regulated
PLEKHA1	Pig	6.73125e-31	1.32709	0.14	0.04	2.45993e-26	Up-regulated
OLFML2B	Pig	6.87578e-31	5.30769	59	1	2.51275e-26	Up-regulated
PIK3CB	Pig	6.95725e-31	1.63236	135	37	2.54253e-26	Up-regulated
EIF2B3	Pig	7.7595e-31	1.07844	209	82	2.83571e-26	Up-regulated
MAVS	Pig	8.04213e-31	4.56339	64	3	2.939e-26	Up-regulated
ANKRD33B	Pig	8.40971e-31	0.930978	239	103	3.07333e-26	Up-regulated
WDFY1	Pig	8.86277e-31	1.35219	158	51	3.2389e-26	Up-regulated
NFYC	Pig	9.46741e-31	0.836738	233	98	3.45987e-26	Up-regulated
SFXN1	Pig	1.02378e-30	0.514533	161	51	3.74141e-26	Up-regulated
LMBRD1	Pig	1.07418e-30	0.752084	204	77	3.92559e-26	Up-regulated
LIPG	Pig	1.09771e-30	1.15298	121	0.03	4.01157e-26	Up-regulated
WT1	Pig	1.10558e-30	5.69036	59	1	4.04034e-26	Up-regulated
SBNO1	Pig	1.19999e-30	0.800656	192	0.07	4.38536e-26	Up-regulated
HLTF	Pig	1.31078e-30	0.885275	165	54	4.79023e-26	Up-regulated
ACOT11	Pig	1.33313e-30	5.90448	57	0	4.87191e-26	Up-regulated
TMED9	Pig	1.34704e-30	1.65228	98	18	4.92275e-26	Up-regulated
CASTOR2	Pig	1.4093e-30	3.81431	75	7	5.15028e-26	Up-regulated
TCEA3	Pig	1.42308e-30	8.79675	56	0	5.20065e-26	Up-regulated
MPC2	Pig	1.59745e-30	2.51138	77	8	5.8379e-26	Up-regulated
PBX4	Pig	1.60161e-30	0.86221	166	55	5.85308e-26	Up-regulated
TOMM70	Pig	1.64147e-30	1.29017	159	51	5.99875e-26	Up-regulated
TNFSF13B	Pig	1.67792e-30	5.55862	0.06	1	6.13195e-26	Up-regulated
SLC35A1	Pig	1.70103e-30	0.674119	181	63	6.21642e-26	Up-regulated
SPIRE1	Pig	1.90754e-30	1.00259	194	74	6.97109e-26	Up-regulated
TPI1	Pig	1.90996e-30	2.58771	82	0.01	6.97994e-26	Up-regulated
PPP1R13B	Pig	1.95337e-30	5.54973	58	1	7.1386e-26	Up-regulated
ILRUN	Pig	2.01303e-30	0.623486	311	148	7.35661e-26	Up-regulated
FAM118B	Pig	2.36293e-30	1.49416	101	19	8.63534e-26	Up-regulated
LSS	Pig	2.56147e-30	3.81718	0.07	6	9.3609e-26	Up-regulated
SSBP3	Pig	2.85346e-30	0.85857	348	183	1.0428e-25	Up-regulated
PPFIBP2	Pig	3.04361e-30	2.30781	106	23	1.11229e-25	Up-regulated
RPS16	Pig	3.04499e-30	0.952966	141	0.04	1.11279e-25	Up-regulated
CCDC90B	Pig	3.76878e-30	0.723036	171	57	1.3773e-25	Up-regulated
STOX2	Pig	3.77843e-30	1.16197	141	42	1.38083e-25	Up-regulated
SLC38A10	Pig	4.12186e-30	0.774363	192	71	1.50633e-25	Up-regulated
UNC93B1	Pig	4.2134e-30	3.19841	76	8	1.53979e-25	Up-regulated
NFYA	Pig	4.5926e-30	1.57131	107	23	1.67837e-25	Up-regulated
CMTM4	Pig	4.65577e-30	2.35668	89	14	1.70145e-25	Up-regulated
RPL3	Pig	4.80222e-30	0.541371	139	39	1.75497e-25	Up-regulated
PFN1	Pig	4.82084e-30	2.53672	72	7	1.76178e-25	Up-regulated
RAB9A	Pig	4.85038e-30	0.947501	218	88	1.77257e-25	Up-regulated
AEBP1	Pig	4.98649e-30	0.562847	155	48	1.82231e-25	Up-regulated
KDM2A	Pig	4.99316e-30	0.532841	631	395	1.82475e-25	Up-regulated
ADSS2	Pig	5.03403e-30	1.67997	112	25	1.83969e-25	Up-regulated
SMTN	Pig	5.32711e-30	2.03588	108	24	1.94679e-25	Up-regulated
AGTPBP1	Pig	5.54209e-30	3.77491	68	5	2.02536e-25	Up-regulated
CTTN	Pig	5.55723e-30	0.583111	217	86	2.03089e-25	Up-regulated
DNAJC15	Pig	5.75267e-30	1.13157	116	27	2.10231e-25	Up-regulated
CHPT1	Pig	5.81284e-30	6.01534	57	1	2.1243e-25	Up-regulated
ENSSSCG00000010401	Pig	5.8883e-30	0.9416	167	56	2.15188e-25	Up-regulated
MID2	Pig	6.08202e-30	1.21435	152	48	2.22268e-25	Up-regulated
ANGPT4	Pig	6.30741e-30	1.42666	94	17	2.30504e-25	Up-regulated
SLC47A1	Pig	6.48723e-30	0.617303	0.18	64	2.37076e-25	Up-regulated
PTGER2	Pig	7.35122e-30	3.66186	69	5	2.6865e-25	Up-regulated
TADA2A	Pig	9.05015e-30	0.808506	197	75	3.30738e-25	Up-regulated
SLC36A1	Pig	9.07151e-30	1.5463	0.12	0.03	3.31518e-25	Up-regulated
CRPPA	Pig	9.2581e-30	1.34142	164	56	3.38337e-25	Up-regulated
C1QTNF1	Pig	9.52877e-30	0.95545	127	34	3.48229e-25	Up-regulated
TTC1	Pig	9.84318e-30	1.09645	174	61	3.59719e-25	Up-regulated
EEPD1	Pig	9.95867e-30	3.4528	67	5	3.63939e-25	Up-regulated
ATXN2	Pig	9.99714e-30	0.50703	512	0.3	3.65345e-25	Up-regulated
PRMT9	Pig	1.0346e-29	1.81563	94	17	3.78094e-25	Up-regulated
MB21D2	Pig	1.09262e-29	1.61599	115	27	3.99296e-25	Up-regulated
UBE2O	Pig	1.16132e-29	1.44923	143	43	4.24403e-25	Up-regulated
ENSSSCG00000029449	Pig	1.19358e-29	6.62024	56	0	4.36195e-25	Up-regulated
ENSSSCG00000038708	Pig	1.22791e-29	1.10585	138	0.04	4.48738e-25	Up-regulated
EMILIN1	Pig	1.32796e-29	0.901732	133	37	4.85302e-25	Up-regulated
PTPN14	Pig	1.35896e-29	1.29186	147	46	4.96631e-25	Up-regulated
STK40	Pig	1.40045e-29	5.87643	0.06	2	5.11796e-25	Up-regulated
CFL1	Pig	1.40537e-29	1.15864	93	16	5.13591e-25	Up-regulated
RNF152	Pig	1.46684e-29	3.83168	64	3	5.36058e-25	Up-regulated
ENSSSCG00000025253	Pig	1.47596e-29	1.02908	222	94	5.39391e-25	Up-regulated
HOGA1	Pig	1.58854e-29	6.64101	56	1	5.80533e-25	Up-regulated
LRRIQ3	Pig	1.77414e-29	1.07693	139	0.04	6.48359e-25	Up-regulated
DLST	Pig	1.86008e-29	1.19509	144	44	6.79766e-25	Up-regulated
ENSSSCG00000049961	Pig	1.96037e-29	0.599729	186	68	7.16418e-25	Up-regulated
SNX9	Pig	2.13805e-29	0.510928	565	345	7.8135e-25	Up-regulated
ENSSSCG00000051054	Pig	2.15441e-29	2.91819	95	18	7.87328e-25	Up-regulated
AP1G1	Pig	2.33525e-29	0.667144	332	167	8.53418e-25	Up-regulated
ENSSSCG00000007692	Pig	2.50904e-29	0.998245	137	39	9.1693e-25	Up-regulated
CPSF2	Pig	2.66762e-29	1.69097	111	26	9.74881e-25	Up-regulated
ENSSSCG00000028345	Pig	2.93668e-29	1.07603	151	48	1.07321e-24	Up-regulated
NARS1	Pig	3.09925e-29	0.732177	167	57	1.13262e-24	Up-regulated
KLF10	Pig	3.21185e-29	1.54266	83	12	1.17377e-24	Up-regulated
TEX9	Pig	3.41552e-29	1.32687	158	53	1.2482e-24	Up-regulated
CCAR1	Pig	3.46834e-29	0.695764	299	144	1.2675e-24	Up-regulated
USP31	Pig	3.53655e-29	0.656288	146	45	1.29243e-24	Up-regulated
N4BP2	Pig	3.86031e-29	0.90705	254	114	1.41075e-24	Up-regulated
AP1B1	Pig	3.87892e-29	8.61535	53	0	1.41755e-24	Up-regulated
COMT	Pig	4.01748e-29	2.5392	92	17	1.46819e-24	Up-regulated
ARHGEF26	Pig	4.01847e-29	0.527763	208	82	1.46855e-24	Up-regulated
RPL36AL	Pig	4.05376e-29	1.47429	0.09	15	1.48145e-24	Up-regulated
SH3GL1	Pig	4.16463e-29	1.2491	0.13	36	1.52197e-24	Up-regulated
WWP1	Pig	4.25844e-29	0.58594	341	174	1.55625e-24	Up-regulated
SEC11A	Pig	4.38738e-29	0.929488	166	57	1.60337e-24	Up-regulated
EXOG	Pig	4.42232e-29	2.66543	83	13	1.61614e-24	Up-regulated
HECA	Pig	4.61445e-29	1.02024	187	0.07	1.68635e-24	Up-regulated
SYPL1	Pig	4.82289e-29	1.01925	156	51	1.76252e-24	Up-regulated
RPN2	Pig	4.99801e-29	0.917251	142	42	1.82652e-24	Up-regulated
OTUD4	Pig	5.06628e-29	0.518816	211	84	1.85147e-24	Up-regulated
NIPAL3	Pig	5.11137e-29	3.84292	67	5	1.86795e-24	Up-regulated
ARPC1B	Pig	5.228e-29	1.42176	106	24	1.91057e-24	Up-regulated
FKBP10	Pig	5.26878e-29	0.722144	114	27	1.92548e-24	Up-regulated
COPB1	Pig	5.59925e-29	0.530643	233	98	2.04624e-24	Up-regulated
CAB39	Pig	5.8859e-29	0.539664	264	118	2.151e-24	Up-regulated
ATG13	Pig	6.74045e-29	0.704559	242	104	2.4633e-24	Up-regulated
NOC3L	Pig	6.84263e-29	0.622211	166	56	2.50064e-24	Up-regulated
POFUT1	Pig	7.07294e-29	0.763316	166	57	2.58481e-24	Up-regulated
RHEB	Pig	7.13131e-29	0.654289	286	135	2.60614e-24	Up-regulated
COX3	Pig	7.22347e-29	0.520468	423	238	2.63982e-24	Up-regulated
FUBP1	Pig	8.65523e-29	0.523464	323	0.16	3.16305e-24	Up-regulated
TSPO	Pig	9.39313e-29	1.23378	91	16	3.43272e-24	Up-regulated
WIPI2	Pig	1.03777e-28	0.787611	223	94	3.79252e-24	Up-regulated
CAMK2G	Pig	1.03817e-28	2.57219	79	11	3.79398e-24	Up-regulated
C9orf85	Pig	1.10697e-28	1.53146	108	25	4.04543e-24	Up-regulated
SLC39A9	Pig	1.11736e-28	0.940027	0.16	54	4.08338e-24	Up-regulated
ASB3	Pig	1.12418e-28	0.650206	213	86	4.10832e-24	Up-regulated
DDX24	Pig	1.13707e-28	1.14046	141	43	4.15541e-24	Up-regulated
GRIA3	Pig	1.16542e-28	9.03732	52	0	4.25903e-24	Up-regulated
ENSSSCG00000004945	Pig	1.19821e-28	1.03953	111	26	4.37885e-24	Up-regulated
HELB	Pig	1.19861e-28	1.04923	134	39	4.38032e-24	Up-regulated
SHLD1	Pig	1.22051e-28	1.21845	173	64	4.46034e-24	Up-regulated
TSKU	Pig	1.22269e-28	1.25735	0.11	26	4.46832e-24	Up-regulated
CYP2R1	Pig	1.22685e-28	2.20941	73	8	4.48352e-24	Up-regulated
ASPDH	Pig	1.25039e-28	2.02143	66	5	4.56956e-24	Up-regulated
RPS9	Pig	1.41609e-28	0.591513	197	75	5.17511e-24	Up-regulated
ME2	Pig	1.41636e-28	2.02073	103	23	5.17609e-24	Up-regulated
EPN2	Pig	1.52257e-28	2.11909	111	27	5.56425e-24	Up-regulated
EIF4E	Pig	1.52811e-28	1.12468	156	52	5.58448e-24	Up-regulated
MED24	Pig	1.6125e-28	2.57725	83	13	5.89289e-24	Up-regulated
ADIPOR2	Pig	1.67661e-28	2.30417	82	12	6.12716e-24	Up-regulated
DNMT1	Pig	2.06253e-28	3.36061	67	6	7.5375e-24	Up-regulated
SLC30A6	Pig	2.20666e-28	1.05578	0.14	43	8.06423e-24	Up-regulated
BORCS5	Pig	2.46572e-28	0.774992	211	86	9.01097e-24	Up-regulated
ENSSSCG00000020686	Pig	2.83988e-28	1.92726	106	24	1.03783e-23	Up-regulated
GFOD2	Pig	2.94826e-28	2.21956	82	12	1.07744e-23	Up-regulated
IDE	Pig	3.02095e-28	0.698752	246	0.11	1.10401e-23	Up-regulated
PIGU	Pig	3.04386e-28	1.27554	121	32	1.11238e-23	Up-regulated
ENSSSCG00000041764	Pig	3.23506e-28	6.24836	53	0	1.18225e-23	Up-regulated
CTSS	Pig	3.34977e-28	1.91087	83	13	1.22417e-23	Up-regulated
MFSD12	Pig	3.92998e-28	3.53059	64	5	1.43621e-23	Up-regulated
ACAD10	Pig	4.59959e-28	1.81872	0.12	33	1.68092e-23	Up-regulated
HADH	Pig	4.64843e-28	1.38097	147	48	1.69877e-23	Up-regulated
SCAMP2	Pig	4.74015e-28	3.24189	74	9	1.73229e-23	Up-regulated
DCX	Pig	4.96547e-28	0.882076	141	44	1.81463e-23	Up-regulated
STX6	Pig	4.98312e-28	1.41389	0.13	37	1.82108e-23	Up-regulated
SPOP	Pig	5.09657e-28	0.627437	258	117	1.86254e-23	Up-regulated
KDM5B	Pig	5.78951e-28	0.547279	404	222	2.11578e-23	Up-regulated
CAVIN1	Pig	6.18577e-28	1.46801	125	35	2.26059e-23	Up-regulated
SPCS2	Pig	6.28756e-28	1.39271	126	36	2.29779e-23	Up-regulated
TRAK2	Pig	6.71427e-28	1.90239	102	23	2.45373e-23	Up-regulated
PLAA	Pig	6.90166e-28	0.587325	222	93	2.52221e-23	Up-regulated
SSR4	Pig	7.1288e-28	0.778453	86	14	2.60522e-23	Up-regulated
ENSSSCG00000048408	Pig	7.15259e-28	1.026	153	51	2.61392e-23	Up-regulated
ENSSSCG00000026996	Pig	7.31369e-28	2.22953	99	21	2.67279e-23	Up-regulated
KIAA0930	Pig	7.33418e-28	2.1048	98	21	2.68027e-23	Up-regulated
PPP1R14B	Pig	7.5021e-28	3.01542	63	4	2.74164e-23	Up-regulated
DAD1	Pig	7.58266e-28	0.725491	93	18	2.77108e-23	Up-regulated
LOXL3	Pig	7.65508e-28	0.506915	213	88	2.79755e-23	Up-regulated
XPO5	Pig	7.85519e-28	0.999483	138	42	2.87068e-23	Up-regulated
CALR	Pig	7.89396e-28	0.576557	0.16	54	2.88485e-23	Up-regulated
PLK4	Pig	7.96591e-28	1.38873	132	0.04	2.91114e-23	Up-regulated
ABHD5	Pig	8.54563e-28	4.18397	59	3	3.123e-23	Up-regulated
NPSR1	Pig	8.72267e-28	1.61044	0.13	38	3.1877e-23	Up-regulated
COMMD3	Pig	8.99752e-28	1.60985	0.1	22	3.28814e-23	Up-regulated
ENSSSCG00000004024	Pig	9.84499e-28	2.83982	64	5	3.59785e-23	Up-regulated
TDG	Pig	9.92798e-28	1.29718	115	29	3.62818e-23	Up-regulated
PFDN1	Pig	1.09461e-27	0.540872	204	81	4.00026e-23	Up-regulated
ADM	Pig	1.09623e-27	1.31976	93	18	4.00618e-23	Up-regulated
NOCT	Pig	1.12278e-27	4.52759	61	4	4.1032e-23	Up-regulated
RFLNB	Pig	1.14784e-27	3.76899	56	2	4.19479e-23	Up-regulated
TFCP2	Pig	1.17249e-27	0.735737	208	85	4.28485e-23	Up-regulated
SPPL2A	Pig	1.26121e-27	0.841815	164	58	4.60909e-23	Up-regulated
RNF2	Pig	1.37927e-27	1.13951	152	51	5.04053e-23	Up-regulated
ZNF260	Pig	1.41434e-27	1.83792	109	27	5.1687e-23	Up-regulated
PTPRC	Pig	1.42956e-27	2.3258	69	7	5.22433e-23	Up-regulated
TMEM178B	Pig	1.47345e-27	1.38267	109	27	5.38474e-23	Up-regulated
SHISA5	Pig	1.57135e-27	0.52658	167	59	5.7425e-23	Up-regulated
TNIK	Pig	1.57653e-27	1.58506	162	61	5.76143e-23	Up-regulated
SOX6	Pig	1.65093e-27	0.588438	325	172	6.03332e-23	Up-regulated
CITED2	Pig	1.66003e-27	3.95132	62	4	6.06659e-23	Up-regulated
IDH3A	Pig	1.69257e-27	4.56653	57	3	6.18551e-23	Up-regulated
GSE1	Pig	1.70329e-27	0.886104	0.19	75	6.22467e-23	Up-regulated
VTA1	Pig	1.7647e-27	0.635983	213	89	6.4491e-23	Up-regulated
CCDC50	Pig	1.86852e-27	0.910951	201	82	6.8285e-23	Up-regulated
HSPBAP1	Pig	1.9021e-27	1.04236	0.12	32	6.95123e-23	Up-regulated
ARHGDIB	Pig	1.90664e-27	1.83408	74	0.01	6.96781e-23	Up-regulated
SH3GL3	Pig	1.9385e-27	3.37066	55	2	7.08425e-23	Up-regulated
KRT10	Pig	2.02828e-27	2.1456	75	0.01	7.41237e-23	Up-regulated
RNF41	Pig	2.03891e-27	2.09812	101	23	7.45118e-23	Up-regulated
USP14	Pig	2.14314e-27	0.60124	204	82	7.83209e-23	Up-regulated
CD36	Pig	2.22702e-27	1.69455	176	71	8.13865e-23	Up-regulated
SLC7A2	Pig	2.32077e-27	4.40164	58	3	8.48124e-23	Up-regulated
SRP54	Pig	2.3977e-27	0.956147	183	0.07	8.76241e-23	Up-regulated
ENSSSCG00000016868	Pig	2.44795e-27	2.96831	63	5	8.94604e-23	Up-regulated
SUFU	Pig	2.50698e-27	0.571576	359	189	9.16175e-23	Up-regulated
OLFML3	Pig	2.55429e-27	2.4601	79	12	9.33466e-23	Up-regulated
NPC2	Pig	2.75696e-27	1.38599	0.09	17	1.00753e-22	Up-regulated
USP28	Pig	2.78888e-27	2.98973	67	7	1.0192e-22	Up-regulated
ITIH4	Pig	3.07739e-27	2.94052	0.06	4	1.12463e-22	Up-regulated
GXYLT1	Pig	3.08334e-27	1.19592	102	23	1.12681e-22	Up-regulated
PRIMPOL	Pig	3.08533e-27	0.510152	149	49	1.12753e-22	Up-regulated
JMY	Pig	3.26022e-27	0.897993	198	0.08	1.19145e-22	Up-regulated
IFT74	Pig	3.35792e-27	0.532073	163	58	1.22715e-22	Up-regulated
TMX3	Pig	3.46946e-27	0.511222	0.15	0.05	1.26791e-22	Up-regulated
RMDN1	Pig	3.50373e-27	0.615148	158	55	1.28044e-22	Up-regulated
ATG4C	Pig	4.03201e-27	1.07247	146	48	1.4735e-22	Up-regulated
RWDD3	Pig	4.06217e-27	1.40566	105	25	1.48452e-22	Up-regulated
RUFY1	Pig	4.10807e-27	0.593966	0.25	114	1.50129e-22	Up-regulated
TBPL1	Pig	4.15983e-27	0.947566	126	36	1.52021e-22	Up-regulated
RBL1	Pig	5.04103e-27	1.24385	107	26	1.84224e-22	Up-regulated
PCGF5	Pig	5.49893e-27	0.700898	208	88	2.00958e-22	Up-regulated
KIF1C	Pig	5.68818e-27	2.73465	76	11	2.07874e-22	Up-regulated
RSC1A1	Pig	5.76167e-27	0.877041	0.19	75	2.1056e-22	Up-regulated
MICALL1	Pig	5.86892e-27	5.85397	53	1	2.1448e-22	Up-regulated
C18orf25	Pig	6.70013e-27	0.746051	235	104	2.44856e-22	Up-regulated
KLF8	Pig	7.01896e-27	1.3427	0.1	23	2.56508e-22	Up-regulated
CFAP100	Pig	7.07805e-27	3.66234	62	5	2.58667e-22	Up-regulated
DLAT	Pig	8.10351e-27	2.21719	81	13	2.96143e-22	Up-regulated
DCAF12	Pig	8.46331e-27	0.925078	161	57	3.09292e-22	Up-regulated
PSMF1	Pig	8.60637e-27	0.771843	211	89	3.1452e-22	Up-regulated
SNAP47	Pig	8.60844e-27	1.02367	166	61	3.14595e-22	Up-regulated
ENSSSCG00000031381	Pig	9.19912e-27	1.42147	97	21	3.36182e-22	Up-regulated
CNKSR2	Pig	9.4193e-27	8.95849	49	0	3.44228e-22	Up-regulated
PSAP	Pig	1.12352e-26	0.648533	218	94	4.1059e-22	Up-regulated
PGGT1B	Pig	1.21844e-26	0.927927	179	69	4.45279e-22	Up-regulated
ZFYVE26	Pig	1.22808e-26	1.13724	164	61	4.48801e-22	Up-regulated
RBBP8	Pig	1.41905e-26	0.707396	141	45	5.18593e-22	Up-regulated
OMA1	Pig	1.43455e-26	1.80889	101	24	5.24256e-22	Up-regulated
ENSSSCG00000007098	Pig	1.49858e-26	0.900188	0.15	51	5.47655e-22	Up-regulated
ENSSSCG00000049158	Pig	1.50893e-26	0.990793	228	103	5.5144e-22	Up-regulated
LEMD3	Pig	1.51009e-26	0.567208	204	84	5.51864e-22	Up-regulated
HERPUD2	Pig	1.57924e-26	0.655054	218	93	5.77133e-22	Up-regulated
P4HB	Pig	1.93832e-26	0.83345	132	0.04	7.08359e-22	Up-regulated
ENSSSCG00000004081	Pig	1.95994e-26	0.906739	243	115	7.16262e-22	Up-regulated
RPL22	Pig	2.00619e-26	1.5185	111	29	7.33162e-22	Up-regulated
UBTD1	Pig	2.01464e-26	2.10182	99	23	7.36251e-22	Up-regulated
ACADM	Pig	2.02829e-26	1.37414	131	41	7.41239e-22	Up-regulated
MBIP	Pig	2.08144e-26	0.793499	133	41	7.60662e-22	Up-regulated
CAV2	Pig	2.16747e-26	2.38944	73	0.01	7.92101e-22	Up-regulated
NAA35	Pig	2.37251e-26	0.548287	249	114	8.67036e-22	Up-regulated
DNAJC25	Pig	2.51381e-26	0.546737	0.18	69	9.18673e-22	Up-regulated
ENSSSCG00000032422	Pig	2.59581e-26	3.17761	59	4	9.48637e-22	Up-regulated
TXNDC11	Pig	2.62641e-26	0.691087	247	114	9.59821e-22	Up-regulated
PTCD3	Pig	2.64528e-26	1.34138	109	28	9.66717e-22	Up-regulated
TMED3	Pig	2.77109e-26	2.07303	64	6	1.0127e-21	Up-regulated
PPP2CA	Pig	2.7809e-26	2.31899	85	16	1.01628e-21	Up-regulated
MFSD6	Pig	2.81857e-26	8.79225	48	0	1.03005e-21	Up-regulated
CASP6	Pig	2.88478e-26	1.30922	126	38	1.05424e-21	Up-regulated
C16orf72	Pig	2.99792e-26	0.580901	218	93	1.09559e-21	Up-regulated
SPECC1	Pig	2.99839e-26	3.98797	55	3	1.09576e-21	Up-regulated
CDCA7L	Pig	3.04701e-26	5.56673	51	1	1.11353e-21	Up-regulated
MARF1	Pig	3.05939e-26	0.83604	192	78	1.11805e-21	Up-regulated
NIPSNAP2	Pig	3.21898e-26	1.51471	138	46	1.17638e-21	Up-regulated
LONP2	Pig	3.89876e-26	0.524746	286	0.14	1.4248e-21	Up-regulated
METTL8	Pig	3.9222e-26	1.50968	0.1	24	1.43337e-21	Up-regulated
IL18	Pig	4.14632e-26	0.872697	0.09	18	1.51527e-21	Up-regulated
REL	Pig	4.26601e-26	1.73696	104	26	1.55901e-21	Up-regulated
BAG4	Pig	4.3459e-26	1.43469	119	34	1.58821e-21	Up-regulated
DDI1	Pig	4.95136e-26	1.98339	74	0.01	1.80947e-21	Up-regulated
SLC2A10	Pig	5.44567e-26	0.558176	159	57	1.99012e-21	Up-regulated
COBLL1	Pig	5.5831e-26	0.511888	208	88	2.04034e-21	Up-regulated
CASP8AP2	Pig	5.65185e-26	0.838581	111	29	2.06547e-21	Up-regulated
TMEM87A	Pig	6.53846e-26	0.721037	209	0.09	2.38948e-21	Up-regulated
MSH4	Pig	6.58089e-26	0.674515	139	45	2.40499e-21	Up-regulated
PTPN3	Pig	7.33687e-26	0.704252	171	64	2.68126e-21	Up-regulated
ZFP36L1	Pig	7.41898e-26	0.684296	174	67	2.71126e-21	Up-regulated
CD9	Pig	7.50423e-26	2.31888	64	7	2.74242e-21	Up-regulated
GTF2IRD1	Pig	7.52564e-26	2.72408	71	0.01	2.75025e-21	Up-regulated
PIGK	Pig	7.67193e-26	1.76811	88	17	2.80371e-21	Up-regulated
WARS1	Pig	8.01962e-26	1.54586	92	0.02	2.93077e-21	Up-regulated
F2RL2	Pig	8.31257e-26	0.685445	105	26	3.03783e-21	Up-regulated
NIM1K	Pig	8.42745e-26	8.55552	47	0	3.07981e-21	Up-regulated
PLAU	Pig	9.48632e-26	3.18222	59	4	3.46678e-21	Up-regulated
ATP5F1C	Pig	9.84464e-26	2.10249	86	17	3.59772e-21	Up-regulated
MLKL	Pig	1.02626e-25	0.820332	94	0.02	3.75045e-21	Up-regulated
OTULIN	Pig	1.19229e-25	1.50544	101	24	4.35724e-21	Up-regulated
KLF2	Pig	1.26593e-25	1.97982	74	11	4.62634e-21	Up-regulated
MAN2A2	Pig	1.34036e-25	1.56906	108	28	4.89835e-21	Up-regulated
PDHA1	Pig	1.39538e-25	3.79445	59	5	5.09941e-21	Up-regulated
COX5A	Pig	1.49252e-25	3.10197	62	6	5.4544e-21	Up-regulated
TMEM38B	Pig	1.50733e-25	1.8151	95	22	5.50855e-21	Up-regulated
CDR2	Pig	1.71767e-25	0.501675	165	61	6.27723e-21	Up-regulated
GIPC1	Pig	1.78406e-25	1.4485	89	19	6.51985e-21	Up-regulated
COPS8	Pig	1.8003e-25	1.40326	96	22	6.5792e-21	Up-regulated
CENPH	Pig	1.80182e-25	2.45534	65	7	6.58475e-21	Up-regulated
CDK15	Pig	1.91583e-25	2.87367	69	9	7.00141e-21	Up-regulated
METTL15	Pig	1.94201e-25	0.651448	185	74	7.09708e-21	Up-regulated
ARHGAP12	Pig	1.9506e-25	0.570059	332	175	7.12845e-21	Up-regulated
ATP5F1A	Pig	2.01564e-25	3.14359	0.06	5	7.36615e-21	Up-regulated
EPB41L3	Pig	2.15682e-25	4.02321	52	2	7.88209e-21	Up-regulated
NOS1AP	Pig	2.19225e-25	0.560847	197	83	8.01158e-21	Up-regulated
PARP3	Pig	2.19361e-25	5.23767	51	2	8.01653e-21	Up-regulated
GPC5	Pig	2.27592e-25	2.16246	0.09	0.02	8.31736e-21	Up-regulated
AASDHPPT	Pig	2.35878e-25	0.574979	178	69	8.62015e-21	Up-regulated
MAPK1IP1L	Pig	2.46362e-25	1.21185	125	38	9.00329e-21	Up-regulated
ERMP1	Pig	2.53729e-25	2.50228	72	0.01	9.27253e-21	Up-regulated
ZC4H2	Pig	2.56357e-25	1.96518	79	13	9.36855e-21	Up-regulated
LRRC59	Pig	2.66705e-25	1.75117	75	12	9.74673e-21	Up-regulated
BMP2K	Pig	2.67918e-25	0.562169	243	113	9.79106e-21	Up-regulated
CDC40	Pig	2.77009e-25	1.29433	118	34	1.01233e-20	Up-regulated
RAB32	Pig	2.7883e-25	1.08249	0.18	74	1.01898e-20	Up-regulated
BCAR1	Pig	2.80154e-25	4.2274	56	4	1.02382e-20	Up-regulated
NGF	Pig	2.88996e-25	2.20653	64	7	1.05614e-20	Up-regulated
CLYBL	Pig	2.94781e-25	0.992134	0.13	41	1.07728e-20	Up-regulated
ENSSSCG00000006395	Pig	2.99514e-25	1.0851	0.1	24	1.09457e-20	Up-regulated
HDAC2	Pig	3.20217e-25	0.790935	122	37	1.17023e-20	Up-regulated
CS	Pig	3.88272e-25	1.86205	0.1	25	1.41894e-20	Up-regulated
ENSSSCG00000008984	Pig	4.35071e-25	8.96347	46	0	1.58997e-20	Up-regulated
ATG4A	Pig	4.35071e-25	8.38059	46	0	1.58997e-20	Up-regulated
ENSSSCG00000033649	Pig	4.47177e-25	0.597198	165	62	1.63421e-20	Up-regulated
NAA20	Pig	4.74977e-25	2.23729	83	16	1.7358e-20	Up-regulated
TRIM26	Pig	4.80238e-25	0.662496	129	41	1.75503e-20	Up-regulated
MTPAP	Pig	5.23694e-25	1.07086	143	0.05	1.91384e-20	Up-regulated
LRRC58	Pig	5.2652e-25	0.852036	139	47	1.92417e-20	Up-regulated
CDK1	Pig	5.487e-25	3.09008	62	7	2.00522e-20	Up-regulated
RALA	Pig	5.58916e-25	0.812218	144	0.05	2.04256e-20	Up-regulated
CERS5	Pig	5.73692e-25	0.711605	175	69	2.09656e-20	Up-regulated
TFB1M	Pig	6.04121e-25	0.526821	202	86	2.20776e-20	Up-regulated
CCDC93	Pig	6.68239e-25	0.565444	268	132	2.44208e-20	Up-regulated
ANKS1B	Pig	6.77434e-25	1.57575	101	26	2.47568e-20	Up-regulated
GOLT1B	Pig	7.00375e-25	0.732212	92	0.02	2.55952e-20	Up-regulated
SUGP1	Pig	7.04692e-25	1.71039	93	21	2.5753e-20	Up-regulated
SLC9A1	Pig	7.4442e-25	4.17493	52	3	2.72048e-20	Up-regulated
FKBP7	Pig	7.84615e-25	1.67985	79	14	2.86738e-20	Up-regulated
CCNYL1	Pig	9.08633e-25	1.54214	86	18	3.3206e-20	Up-regulated
TEX2	Pig	9.29606e-25	1.50954	111	31	3.39725e-20	Up-regulated
CDC42EP5	Pig	9.39838e-25	1.38914	68	9	3.43464e-20	Up-regulated
L3MBTL3	Pig	9.73133e-25	0.57295	136	45	3.55632e-20	Up-regulated
NGLY1	Pig	1.025e-24	0.599336	181	73	3.74585e-20	Up-regulated
MED12L	Pig	1.04594e-24	0.588021	151	54	3.82237e-20	Up-regulated
BAALC	Pig	1.10266e-24	3.65231	56	4	4.02966e-20	Up-regulated
TMCO4	Pig	1.17178e-24	0.891869	97	24	4.28228e-20	Up-regulated
FAM117B	Pig	1.26815e-24	0.860463	146	52	4.63446e-20	Up-regulated
MMP11	Pig	1.29833e-24	8.51212	45	0	4.74473e-20	Up-regulated
ERRFI1	Pig	1.30294e-24	1.35665	123	39	4.7616e-20	Up-regulated
AR	Pig	1.31072e-24	1.01545	116	34	4.79002e-20	Up-regulated
AZIN2	Pig	1.39471e-24	2.20259	69	0.01	5.09698e-20	Up-regulated
DOCK4	Pig	1.42367e-24	1.11724	196	89	5.20282e-20	Up-regulated
ERCC8	Pig	1.43702e-24	1.01358	131	43	5.25159e-20	Up-regulated
CCDC39	Pig	1.49304e-24	1.02311	89	0.02	5.45632e-20	Up-regulated
PLPPR5	Pig	1.50677e-24	1.2875	89	0.02	5.50649e-20	Up-regulated
CARNMT1	Pig	1.6846e-24	1.83337	87	19	6.15639e-20	Up-regulated
CRYBG1	Pig	1.72081e-24	2.60767	68	0.01	6.28872e-20	Up-regulated
SNX29	Pig	1.74195e-24	0.511484	412	237	6.36596e-20	Up-regulated
TSGA10	Pig	1.8284e-24	1.34752	97	24	6.68189e-20	Up-regulated
ENSSSCG00000010531	Pig	1.9274e-24	0.825335	144	51	7.04368e-20	Up-regulated
FANCL	Pig	2.02265e-24	5.12976	49	2	7.39178e-20	Up-regulated
CPSF3	Pig	2.06699e-24	1.69194	101	26	7.55381e-20	Up-regulated
TTC33	Pig	2.10896e-24	0.875968	154	57	7.70718e-20	Up-regulated
PDHX	Pig	2.53747e-24	0.696711	171	67	9.27317e-20	Up-regulated
SNAPC1	Pig	2.58401e-24	1.124	125	0.04	9.44326e-20	Up-regulated
SNAI2	Pig	2.69756e-24	0.797462	113	33	9.85825e-20	Up-regulated
CMTR1	Pig	2.84166e-24	0.50223	293	148	1.03848e-19	Up-regulated
IRF2BP2	Pig	3.15486e-24	2.24371	86	19	1.15294e-19	Up-regulated
ARRDC2	Pig	3.21706e-24	2.58021	69	0.01	1.17567e-19	Up-regulated
ENSSSCG00000034802	Pig	3.26979e-24	4.44963	46	1	1.19495e-19	Up-regulated
PSMB8	Pig	3.27894e-24	3.53828	0.05	2	1.19829e-19	Up-regulated
LARP1B	Pig	3.48352e-24	2.8091	59	6	1.27305e-19	Up-regulated
METRNL	Pig	3.50649e-24	6.49791	45	0	1.28145e-19	Up-regulated
CAT	Pig	3.69012e-24	1.04144	171	0.07	1.34855e-19	Up-regulated
MTX2	Pig	3.73995e-24	0.651815	183	75	1.36676e-19	Up-regulated
DPP3	Pig	3.89214e-24	2.02361	0.07	11	1.42238e-19	Up-regulated
HSDL2	Pig	3.91213e-24	0.810654	139	48	1.42969e-19	Up-regulated
TRIP4	Pig	4.09579e-24	0.656347	179	72	1.49681e-19	Up-regulated
IGFBP4	Pig	4.45252e-24	0.859347	125	0.04	1.62717e-19	Up-regulated
GSAP	Pig	4.60338e-24	4.08492	52	3	1.68231e-19	Up-regulated
STX7	Pig	4.61105e-24	1.03089	0.14	0.05	1.68511e-19	Up-regulated
SCARB1	Pig	4.68091e-24	1.40967	149	56	1.71064e-19	Up-regulated
NAB1	Pig	4.74689e-24	0.641074	0.21	93	1.73475e-19	Up-regulated
DLD	Pig	4.95376e-24	1.05388	134	46	1.81035e-19	Up-regulated
PRIM2	Pig	5.04063e-24	0.898168	128	42	1.8421e-19	Up-regulated
ENSSSCG00000034844	Pig	5.07086e-24	0.574263	169	67	1.85315e-19	Up-regulated
FOSL2	Pig	5.0709e-24	0.632342	174	0.07	1.85316e-19	Up-regulated
ODF2L	Pig	5.09155e-24	0.543762	135	46	1.86071e-19	Up-regulated
PATL1	Pig	5.3479e-24	1.1926	127	41	1.95439e-19	Up-regulated
RPL6	Pig	5.36373e-24	0.577175	135	45	1.96018e-19	Up-regulated
ZNF484	Pig	5.85245e-24	0.588544	128	41	2.13878e-19	Up-regulated
UBN1	Pig	6.11047e-24	0.654812	196	84	2.23307e-19	Up-regulated
ANKH	Pig	6.68341e-24	8.80947	43	0	2.44245e-19	Up-regulated
CHORDC1	Pig	6.77853e-24	0.581685	185	77	2.47721e-19	Up-regulated
CEPT1	Pig	7.31074e-24	1.35635	107	0.03	2.67171e-19	Up-regulated
SLC25A15	Pig	7.934e-24	1.75272	86	19	2.89948e-19	Up-regulated
ENSSSCG00000023158	Pig	8.21455e-24	0.942723	104	28	3.00201e-19	Up-regulated
CRTC3	Pig	8.53862e-24	0.511853	0.35	191	3.12044e-19	Up-regulated
SPATA6L	Pig	8.7133e-24	6.10282	46	1	3.18428e-19	Up-regulated
SNAP25	Pig	9.12653e-24	3.68415	51	3	3.33529e-19	Up-regulated
ENSSSCG00000028679	Pig	9.18067e-24	1.10284	138	48	3.35508e-19	Up-regulated
NRXN1	Pig	9.23779e-24	1.37058	188	85	3.37595e-19	Up-regulated
CCDC148	Pig	1.02134e-23	1.5762	88	0.02	3.73249e-19	Up-regulated
PTGER4	Pig	1.06078e-23	6.22781	44	0	3.87664e-19	Up-regulated
TOB2	Pig	1.06495e-23	2.84813	65	9	3.89186e-19	Up-regulated
CENPW	Pig	1.06749e-23	1.355	89	0.02	3.90115e-19	Up-regulated
RAMP1	Pig	1.08725e-23	4.32644	44	0	3.97335e-19	Up-regulated
TUBA8	Pig	1.15356e-23	8.27356	43	0	4.21568e-19	Up-regulated
SLC16A3	Pig	1.15356e-23	8.45958	43	0	4.21568e-19	Up-regulated
MTMR12	Pig	1.24906e-23	2.5612	66	0.01	4.56469e-19	Up-regulated
GYG1	Pig	1.26225e-23	2.73703	59	6	4.61291e-19	Up-regulated
TMEM263	Pig	1.31965e-23	0.881541	115	34	4.82265e-19	Up-regulated
ZRANB1	Pig	1.37404e-23	0.633795	226	105	5.02141e-19	Up-regulated
PCDH18	Pig	1.49125e-23	1.25819	75	13	5.44978e-19	Up-regulated
TUBD1	Pig	1.50951e-23	3.83721	51	3	5.51649e-19	Up-regulated
ZNF592	Pig	1.55866e-23	0.693032	255	126	5.69613e-19	Up-regulated
CYP2B22	Pig	1.68796e-23	2.21863	66	0.01	6.16867e-19	Up-regulated
GTF2A1	Pig	1.74999e-23	0.834148	142	51	6.39536e-19	Up-regulated
LAMP1	Pig	1.7889e-23	1.32084	109	32	6.53752e-19	Up-regulated
ENSSSCG00000032383	Pig	1.88372e-23	1.14717	97	25	6.88404e-19	Up-regulated
HDAC5	Pig	2.23633e-23	2.44376	73	13	8.17266e-19	Up-regulated
EMC2	Pig	2.333e-23	0.520562	274	0.14	8.52595e-19	Up-regulated
NHLRC2	Pig	2.48606e-23	0.875695	161	64	9.08532e-19	Up-regulated
TUBB	Pig	2.52885e-23	1.03116	94	24	9.24169e-19	Up-regulated
CSE1L	Pig	2.86462e-23	0.647779	166	66	1.04688e-18	Up-regulated
SEC61B	Pig	3.06899e-23	2.88013	56	5	1.12156e-18	Up-regulated
SERF2	Human	3.33419e-23	1.39238	63	8	1.21848e-18	Up-regulated
GSR	Pig	3.56148e-23	0.728279	0.14	0.05	1.30154e-18	Up-regulated
FSTL3	Pig	4.07377e-23	1.42648	0.08	17	1.48876e-18	Up-regulated
ENSSSCG00000012916	Pig	4.07752e-23	2.96132	56	5	1.49013e-18	Up-regulated
ENTPD4	Pig	4.11425e-23	0.755945	121	39	1.50355e-18	Up-regulated
TRIM24	Pig	4.24066e-23	0.691286	225	107	1.54975e-18	Up-regulated
PSMB7	Pig	4.55886e-23	0.603935	159	61	1.66603e-18	Up-regulated
COQ8A	Pig	4.63754e-23	3.31929	57	6	1.69479e-18	Up-regulated
TMEM168	Pig	4.65951e-23	0.543565	211	95	1.70282e-18	Up-regulated
ERAP2	Pig	5.0863e-23	1.80646	0.06	7	1.85879e-18	Up-regulated
HYOU1	Pig	5.11835e-23	2.5996	0.06	7	1.8705e-18	Up-regulated
ZNF713	Pig	5.45635e-23	1.96229	75	14	1.99402e-18	Up-regulated
RBFOX1	Pig	5.46025e-23	6.27785	43	0	1.99545e-18	Up-regulated
MBOAT1	Pig	5.53261e-23	0.617615	168	69	2.02189e-18	Up-regulated
ABHD12	Pig	5.58295e-23	2.61198	0.06	7	2.04029e-18	Up-regulated
LYSMD3	Pig	5.64514e-23	0.502022	165	65	2.06302e-18	Up-regulated
DTNA	Pig	5.92489e-23	8.06281	42	0	2.16525e-18	Up-regulated
MYORG	Pig	6.06947e-23	0.684963	166	67	2.21809e-18	Up-regulated
TAF8	Pig	6.09751e-23	0.974088	155	0.06	2.22834e-18	Up-regulated
UHRF1BP1	Pig	6.27904e-23	2.07833	87	21	2.29467e-18	Up-regulated
PWWP2A	Pig	6.35637e-23	1.13473	134	48	2.32294e-18	Up-regulated
FKBP14	Pig	6.98098e-23	1.20474	68	11	2.5512e-18	Up-regulated
MAGED1	Pig	7.00346e-23	0.563689	116	36	2.55941e-18	Up-regulated
PARPBP	Pig	7.30066e-23	1.75419	64	9	2.66803e-18	Up-regulated
PLGRKT	Pig	7.42486e-23	1.69476	84	19	2.71342e-18	Up-regulated
ENSSSCG00000039972	Pig	7.6738e-23	0.73722	0.18	76	2.80439e-18	Up-regulated
SLC39A7	Pig	7.9237e-23	0.874474	68	11	2.89572e-18	Up-regulated
CALHM5	Pig	8.02873e-23	1.16592	75	14	2.9341e-18	Up-regulated
ENSSSCG00000008183	Pig	8.23886e-23	4.01014	44	1	3.01089e-18	Up-regulated
ANGPTL4	Pig	9.14513e-23	1.16233	78	16	3.34209e-18	Up-regulated
BLMH	Pig	9.47315e-23	0.566132	133	46	3.46196e-18	Up-regulated
IL27RA	Pig	9.55433e-23	4.72009	46	2	3.49163e-18	Up-regulated
RPS18	Pig	9.88188e-23	0.697729	127	42	3.61133e-18	Up-regulated
SCAP	Pig	1.01522e-22	1.6187	0.09	22	3.71011e-18	Up-regulated
PSMD7	Pig	1.08885e-22	1.14789	95	25	3.97921e-18	Up-regulated
SERAC1	Pig	1.09213e-22	1.48078	103	0.03	3.9912e-18	Up-regulated
SQLE	Pig	1.14897e-22	5.55003	45	1	4.19891e-18	Up-regulated
PRKAR2B	Pig	1.3543e-22	1.98736	79	17	4.94929e-18	Up-regulated
CIAO2A	Pig	1.42093e-22	3.59663	49	3	5.1928e-18	Up-regulated
GPX8	Pig	1.47825e-22	0.709543	99	27	5.40225e-18	Up-regulated
ARPC3	Pig	1.53015e-22	0.606958	136	48	5.59192e-18	Up-regulated
MRPL13	Pig	1.59005e-22	1.4334	92	24	5.81084e-18	Up-regulated
SARS1	Pig	1.72027e-22	0.988029	98	27	6.28672e-18	Up-regulated
SDHD	Pig	1.8539e-22	3.79248	51	4	6.77506e-18	Up-regulated
ENSSSCG00000035676	Pig	1.87526e-22	0.652615	185	0.08	6.85315e-18	Up-regulated
WDR3	Pig	1.89111e-22	1.51172	88	21	6.91106e-18	Up-regulated
DNAL1	Pig	2.14276e-22	1.39874	0.08	17	7.83071e-18	Up-regulated
CTSD	Pig	2.28601e-22	1.44913	0.08	17	8.35423e-18	Up-regulated
C6orf89	Pig	2.39089e-22	0.802886	138	51	8.7375e-18	Up-regulated
GNPDA2	Pig	2.39524e-22	0.804559	154	61	8.75341e-18	Up-regulated
CLEC11A	Pig	2.56079e-22	3.40544	43	1	9.35842e-18	Up-regulated
ENSSSCG00000029039	Pig	2.62854e-22	1.49975	66	0.01	9.60601e-18	Up-regulated
ADAMTS7	Pig	2.70314e-22	2.57751	64	0.01	9.87864e-18	Up-regulated
COQ9	Pig	2.70408e-22	4.38822	47	3	9.88207e-18	Up-regulated
NHSL1	Pig	2.73547e-22	0.869144	222	111	9.99679e-18	Up-regulated
UTP6	Pig	3.13589e-22	0.748207	106	31	1.14601e-17	Up-regulated
ENSSSCG00000002281	Pig	3.3077e-22	1.47239	102	0.03	1.2088e-17	Up-regulated
NEK11	Pig	3.65146e-22	3.07571	62	9	1.33443e-17	Up-regulated
ASAH1	Pig	3.76197e-22	1.32869	93	24	1.37481e-17	Up-regulated
NET1	Pig	3.88646e-22	0.824311	92	24	1.42031e-17	Up-regulated
FANCB	Pig	3.92905e-22	0.962491	94	25	1.43587e-17	Up-regulated
GART	Pig	4.11391e-22	1.01029	109	34	1.50343e-17	Up-regulated
DCDC1	Pig	4.54937e-22	2.73578	62	9	1.66257e-17	Up-regulated
TGFB3	Pig	4.60577e-22	2.16637	54	5	1.68318e-17	Up-regulated
CRTC1	Pig	5.11934e-22	0.932671	106	32	1.87086e-17	Up-regulated
TNIP1	Pig	5.13901e-22	1.93098	79	17	1.87805e-17	Up-regulated
ACTR2	Pig	5.14341e-22	0.512891	177	75	1.87966e-17	Up-regulated
ENSSSCG00000033422	Pig	5.17157e-22	1.03049	0.13	47	1.88995e-17	Up-regulated
ENSSSCG00000047344	Pig	5.23716e-22	8.25373	0.04	0	1.91392e-17	Up-regulated
ARID1A	Pig	5.25659e-22	0.551011	236	116	1.92102e-17	Up-regulated
CEP152	Pig	5.346e-22	0.879124	88	22	1.9537e-17	Up-regulated
GBP2	Pig	5.56718e-22	0.837054	128	45	2.03453e-17	Up-regulated
NAA50	Pig	5.78055e-22	0.59842	183	79	2.1125e-17	Up-regulated
CPT2	Pig	5.8041e-22	0.639026	148	57	2.12111e-17	Up-regulated
ING3	Pig	6.05098e-22	2.71092	57	7	2.21133e-17	Up-regulated
COMMD1	Pig	6.29953e-22	0.791684	144	55	2.30216e-17	Up-regulated
PRDX4	Pig	6.30806e-22	0.567283	111	34	2.30528e-17	Up-regulated
ZNF24	Pig	6.45423e-22	0.895774	125	43	2.3587e-17	Up-regulated
RGS2	Pig	7.31846e-22	3.35232	51	4	2.67453e-17	Up-regulated
MTCL1	Pig	7.79515e-22	2.52248	55	6	2.84874e-17	Up-regulated
ENSSSCG00000009281	Pig	8.2045e-22	6.35834	41	0	2.99833e-17	Up-regulated
ADAMTSL3	Pig	8.23949e-22	0.59414	278	0.15	3.01112e-17	Up-regulated
BPNT2	Pig	8.28913e-22	0.680242	133	47	3.02926e-17	Up-regulated
ELOB	Pig	8.35667e-22	1.80329	66	11	3.05395e-17	Up-regulated
ALG8	Pig	9.30536e-22	1.34962	72	14	3.40064e-17	Up-regulated
ENSSSCG00000039004	Pig	9.39146e-22	2.20993	64	0.01	3.43211e-17	Up-regulated
INTS7	Pig	9.89814e-22	1.68023	77	17	3.61728e-17	Up-regulated
DCUN1D3	Pig	1.02156e-21	0.50743	173	73	3.73329e-17	Up-regulated
TBX3	Pig	1.07969e-21	1.85607	65	11	3.94571e-17	Up-regulated
KLHDC3	Pig	1.12644e-21	1.71281	88	22	4.11659e-17	Up-regulated
ENSSSCG00000033424	Pig	1.19446e-21	0.512854	207	95	4.36515e-17	Up-regulated
NME2	Pig	1.20402e-21	1.06038	83	19	4.40011e-17	Up-regulated
ENSSSCG00000022842	Pig	1.2807e-21	1.78747	56	7	4.68031e-17	Up-regulated
IFIT2	Pig	1.39478e-21	2.0002	53	5	5.09723e-17	Up-regulated
ATP6AP2	Pig	1.40821e-21	1.38567	0.09	24	5.14631e-17	Up-regulated
TLE4	Pig	1.4322e-21	0.725579	193	88	5.23396e-17	Up-regulated
DCUN1D5	Pig	1.46925e-21	0.75833	126	44	5.36939e-17	Up-regulated
TBC1D22B	Pig	1.51582e-21	1.33198	101	0.03	5.53955e-17	Up-regulated
BPNT1	Pig	1.57602e-21	3.01928	51	5	5.75956e-17	Up-regulated
H3-5	Pig	1.65515e-21	0.69037	236	118	6.04874e-17	Up-regulated
ADPRM	Pig	1.67914e-21	3.50761	49	4	6.13641e-17	Up-regulated
CTPS1	Pig	1.71603e-21	2.07151	0.06	8	6.27122e-17	Up-regulated
CCNI	Pig	1.75651e-21	0.6715	153	61	6.41918e-17	Up-regulated
ITM2C	Pig	1.83389e-21	0.83981	88	22	6.70196e-17	Up-regulated
ENSSSCG00000010517	Pig	1.8639e-21	4.22788	45	2	6.81163e-17	Up-regulated
SKP2	Pig	1.98803e-21	2.77111	63	0.01	7.26527e-17	Up-regulated
CPNE3	Pig	2.02872e-21	0.553567	203	95	7.41394e-17	Up-regulated
CLCA1	Pig	2.10818e-21	5.5657	41	1	7.70436e-17	Up-regulated
CFAP97	Pig	2.11988e-21	0.700807	111	35	7.7471e-17	Up-regulated
PPARD	Pig	2.12732e-21	2.09833	79	18	7.77429e-17	Up-regulated
HSPD1	Pig	2.14903e-21	0.915686	117	39	7.85361e-17	Up-regulated
HMOX2	Pig	2.32727e-21	2.21416	0.07	13	8.50501e-17	Up-regulated
ENSSSCG00000000473	Pig	2.33281e-21	0.883885	104	31	8.52525e-17	Up-regulated
TPST2	Pig	2.36168e-21	5.08158	43	2	8.63076e-17	Up-regulated
ENSSSCG00000000405	Pig	2.38309e-21	3.60946	43	2	8.70901e-17	Up-regulated
CD99L2	Pig	2.52649e-21	0.52747	158	64	9.23305e-17	Up-regulated
BCL9	Pig	2.66061e-21	1.8137	81	19	9.7232e-17	Up-regulated
P2RX4	Pig	2.67978e-21	8.1834	38	0	9.79325e-17	Up-regulated
TOB1	Human	2.67978e-21	7.87801	38	0	9.79325e-17	Up-regulated
ERO1B	Pig	2.82745e-21	0.935274	94	26	1.03329e-16	Up-regulated
THY1	Pig	2.99341e-21	0.913701	89	24	1.09394e-16	Up-regulated
COX7C	Pig	3.01582e-21	2.0924	63	0.01	1.10213e-16	Up-regulated
CDYL2	Pig	3.22879e-21	0.520764	119	0.04	1.17996e-16	Up-regulated
MAP9	Pig	3.28551e-21	1.95354	55	7	1.20069e-16	Up-regulated
ADCY6	Pig	3.87565e-21	3.07341	41	1	1.41636e-16	Up-regulated
MANBA	Pig	4.01494e-21	2.46074	0.06	9	1.46726e-16	Up-regulated
TFRC	Pig	4.28172e-21	5.62089	39	0	1.56476e-16	Up-regulated
CFAP299	Pig	4.46335e-21	2.86338	54	6	1.63113e-16	Up-regulated
GM2A	Pig	4.61618e-21	7.96589	38	0	1.68698e-16	Up-regulated
DCAF7	Pig	4.65777e-21	1.26938	97	28	1.70218e-16	Up-regulated
NUDT21	Pig	5.13282e-21	0.656646	144	56	1.87579e-16	Up-regulated
A4GALT	Pig	5.25077e-21	2.27596	0.07	14	1.9189e-16	Up-regulated
ENSSSCG00000004983	Pig	5.29051e-21	0.723961	113	37	1.93342e-16	Up-regulated
ENSSSCG00000038633	Pig	5.32328e-21	1.47692	84	21	1.94539e-16	Up-regulated
RCC2	Pig	5.36618e-21	1.71426	69	13	1.96107e-16	Up-regulated
[truncated: 2,084 more rows]

## Sheet: NC
gene	Species	p_val	avg_log2FC	pct. 1	pct.2	p_val_adj	level
PLPP1	Pig	1.33133e-15	3.42816	885	383	4.86536e-11	Up-regulated
DLG2	Pig	2.62677e-14	3.39312	865	383	9.59952e-10	Up-regulated
NAV2	Pig	1.21777e-12	2.14262	899	617	4.45034e-08	Up-regulated
ITGB8	Pig	2.4276e-12	4.33855	736	213	8.87166e-08	Up-regulated
GRIK2	Pig	2.78083e-12	2.48364	892	553	1.01625e-07	Up-regulated
ENSSSCG00000049691	Pig	8.05366e-12	2.20009	885	489	2.94321e-07	Up-regulated
NRIP1	Pig	1.61025e-11	3.31504	764	319	5.88467e-07	Up-regulated
GLIS3	Pig	1.87464e-11	2.66826	872	574	6.85086e-07	Up-regulated
PEAK1	Pig	2.89181e-11	1.94723	878	596	1.05681e-06	Up-regulated
NKAIN2	Pig	3.60537e-11	3.87242	682	106	1.31758e-06	Up-regulated
ROR1	Pig	7.68461e-11	4.91805	642	106	2.80834e-06	Up-regulated
UTRN	Pig	4.24569e-10	1.38833	932	915	1.55159e-05	Up-regulated
RUNX2	Pig	3.63133e-09	3.96253	649	0.17	0.000132707	Up-regulated
TRIO	Pig	1.82834e-08	2.37283	716	362	0.000668168	Up-regulated
RUNX1	Pig	2.96776e-08	5.0638	541	106	0.00108457	Up-regulated
ADGRB3	Pig	4.83596e-08	10.2899	446	0	0.0017673	Up-regulated
TANC2	Pig	7.35235e-08	4.93119	514	85	0.00268692	Up-regulated
ARHGAP24	Pig	9.64772e-08	0.882282	953	915	0.00352576	Up-regulated
OXR1	Pig	1.18301e-07	2.74683	662	319	0.00432332	Up-regulated
EHBP1	Pig	2.53573e-07	3.02122	703	511	0.00926681	Up-regulated
ANKRD44	Pig	2.70878e-07	1.34473	851	0.66	0.00989922	Up-regulated
GSK3B	Pig	3.79056e-07	1.73343	0.73	489	0.0138526	Up-regulated
CAMK2D	Pig	3.98098e-07	1.93802	818	723	0.0145485	Up-regulated
MTUS1	Pig	4.89567e-07	2.09498	703	383	0.0178912	Up-regulated
CDYL2	Pig	1.33643e-06	3.7195	432	43	0.0488399	Up-regulated
CD55	Human	2.92669e-25	-5.07963	0.02	702	1.06956e-20	Down-regulated
RORA	Pig	8.06727e-21	-3.19451	149	851	2.94818e-16	Down-regulated
ENSSSCG00000005518	Pig	8.46716e-20	-3.194	189	851	3.09432e-15	Down-regulated
PHLDB1	Pig	3.85235e-18	-2.75476	0.25	872	1.40784e-13	Down-regulated
KIAA1217	Pig	1.12987e-17	-3.15758	155	787	4.12909e-13	Down-regulated
TTN	Pig	7.9026e-17	-1.93539	101	702	2.888e-12	Down-regulated
COL5A3	Pig	1.11829e-16	-3.53323	81	638	4.0868e-12	Down-regulated
DNER	Pig	2.58679e-16	-2.03239	392	957	9.45341e-12	Down-regulated
ABCA6	Pig	5.85012e-16	-3.49648	74	617	2.13793e-11	Down-regulated
GALNT13	Pig	1.31145e-15	-4.77792	54	553	4.79269e-11	Down-regulated
NDST3	Pig	2.56508e-14	-3.29447	101	617	9.37408e-10	Down-regulated
ENSSSCG00000032439	Pig	8.7142e-14	-2.37297	223	809	3.1846e-09	Down-regulated
THRB	Pig	1.43732e-13	-3.74493	47	489	5.25267e-09	Down-regulated
AGAP1	Pig	1.52138e-13	-1.53625	757	1	5.55988e-09	Down-regulated
HIF3A	Pig	2.53145e-13	-3.47163	47	489	9.25118e-09	Down-regulated
SLC8A1	Pig	7.58035e-13	-3.47369	41	468	2.77024e-08	Down-regulated
ABCA8	Pig	1.09931e-12	-3.95847	41	447	4.01744e-08	Down-regulated
CNTN3	Pig	1.27923e-12	-3.15063	122	617	4.67494e-08	Down-regulated
PTPRT	Pig	1.45972e-12	-2.29819	264	809	5.33453e-08	Down-regulated
ENSSSCG00000033643	Pig	2.01332e-12	-1.85427	311	0.83	7.35769e-08	Down-regulated
TNS3	Pig	2.08691e-12	-2.48935	88	574	7.62662e-08	Down-regulated
SGIP1	Pig	4.4715e-12	-2.97647	47	468	1.63411e-07	Down-regulated
ENSSSCG00000032877	Pig	6.09466e-12	-2.96414	54	489	2.2273e-07	Down-regulated
ABI3BP	Pig	6.27151e-12	-2.13547	68	532	2.29192e-07	Down-regulated
COL15A1	Pig	6.34086e-12	-3.60995	47	447	2.31727e-07	Down-regulated
PEAR1	Pig	8.88717e-12	-2.84529	34	426	3.24782e-07	Down-regulated
LRRTM4	Pig	9.05625e-12	-1.9919	405	915	3.30961e-07	Down-regulated
PDE4D	Pig	6.25094e-11	-2.07399	291	766	2.28441e-06	Down-regulated
HPGD	Pig	6.29101e-11	-6.6166	7	298	2.29905e-06	Down-regulated
PDE3B	Pig	8.77516e-11	-4.51743	27	362	3.20688e-06	Down-regulated
AUTS2	Pig	1.62677e-10	-1.3449	757	979	5.94504e-06	Down-regulated
SPARCL1	Pig	1.65046e-10	-2.77777	108	532	6.0316e-06	Down-regulated
ZNF704	Pig	1.68696e-10	-3.67521	27	362	6.16499e-06	Down-regulated
EBF1	Pig	1.87647e-10	-4.77734	41	383	6.85754e-06	Down-regulated
STK32B	Pig	3.50738e-10	-3.28568	47	404	1.28177e-05	Down-regulated
ARHGAP31	Pig	4.60577e-10	-1.48771	473	915	1.68318e-05	Down-regulated
OLFM2	Pig	6.1393e-10	-4.84862	14	298	2.24361e-05	Down-regulated
MECOM	Pig	6.47254e-10	-3.89949	27	0.34	2.36539e-05	Down-regulated
CPXM2	Pig	6.80086e-10	-2.21783	209	681	2.48537e-05	Down-regulated
PREX2	Pig	6.8727e-10	-2.13581	142	596	2.51163e-05	Down-regulated
COL21A1	Pig	7.18873e-10	-4.35303	14	298	2.62712e-05	Down-regulated
RBPMS	Pig	1.07405e-09	-1.3563	128	596	3.92511e-05	Down-regulated
SLC44A2	Pig	1.14078e-09	-3.5155	0.02	319	4.16897e-05	Down-regulated
KIAA1755	Pig	1.22417e-09	-3.28461	27	0.34	4.47371e-05	Down-regulated
LRRK1	Pig	1.51052e-09	-3.18483	27	0.34	5.52019e-05	Down-regulated
LIMS2	Pig	1.57815e-09	-7.49806	0	234	5.76737e-05	Down-regulated
PRCP	Pig	1.57815e-09	-8.10508	0	234	5.76737e-05	Down-regulated
DISC1	Pig	1.63131e-09	-1.65953	277	766	5.96164e-05	Down-regulated
APOA1	Pig	1.83814e-09	-3.64315	41	362	6.7175e-05	Down-regulated
CCDC85A	Pig	1.96392e-09	-2.30592	122	532	7.17714e-05	Down-regulated
PPFIBP1	Pig	2.37052e-09	-2.1478	108	532	8.66307e-05	Down-regulated
SLIT3	Pig	2.3934e-09	-1.18076	264	787	8.74667e-05	Down-regulated
PDE3A	Pig	2.41275e-09	-1.68286	149	617	8.81741e-05	Down-regulated
C8orf89	Pig	2.51752e-09	-2.97509	47	383	9.20027e-05	Down-regulated
PTPRM	Pig	2.56301e-09	-2.35452	0.23	0.66	9.36652e-05	Down-regulated
KAZN	Pig	2.92243e-09	-4.25083	27	319	0.0001068	Down-regulated
GRIK3	Pig	3.16988e-09	-1.27948	703	979	0.000115843	Down-regulated
CD36	Pig	3.62074e-09	-4.98087	7	255	0.00013232	Down-regulated
PHACTR2	Pig	4.37428e-09	-3.99625	0.02	298	0.000159858	Down-regulated
ABLIM1	Pig	4.86923e-09	-2.22756	176	596	0.000177946	Down-regulated
NRXN1	Pig	5.43565e-09	-1.22367	622	979	0.000198646	Down-regulated
ADAM23	Pig	7.05157e-09	-1.46333	628	957	0.0002577	Down-regulated
ACSBG1	Pig	8.74804e-09	-2.56858	128	511	0.000319697	Down-regulated
PRKG1	Pig	1.12395e-08	-2.98311	47	362	0.000410747	Down-regulated
ERBB3	Pig	1.37613e-08	-2.30955	155	553	0.000502907	Down-regulated
LGI1	Pig	1.4858e-08	-2.91146	68	404	0.000542986	Down-regulated
ENSSSCG00000004082	Pig	1.5048e-08	-2.17802	149	532	0.000549931	Down-regulated
SRCIN1	Pig	2.16694e-08	-3.57524	61	383	0.000791907	Down-regulated
RCAN2	Pig	2.24521e-08	-2.04707	182	596	0.000820512	Down-regulated
ARAP3	Pig	2.54855e-08	-3.16446	34	319	0.000931366	Down-regulated
ENSSSCG00000043817	Pig	2.87354e-08	-2.15383	142	532	0.00105013	Down-regulated
ENSSSCG00000044700	Pig	3.43124e-08	-1.27936	358	766	0.00125395	Down-regulated
ND4	Pig	3.60152e-08	-3.18538	27	298	0.00131618	Down-regulated
ENSSSCG00000003839	Pig	4.17508e-08	-4.64745	34	298	0.00152578	Down-regulated
NTN4	Pig	5.05749e-08	-1.74545	243	0.66	0.00184826	Down-regulated
CYRIA	Pig	5.1964e-08	-2.13947	128	489	0.00189902	Down-regulated
CD46	Human	5.61098e-08	-6.94024	0	191	0.00205053	Down-regulated
PDGFB	Pig	5.61098e-08	-7.63673	0	191	0.00205053	Down-regulated
ENSSSCG00000037260	Pig	5.61098e-08	-7.30339	0	191	0.00205053	Down-regulated
SGMS1	Pig	7.06411e-08	-1.88182	169	553	0.00258158	Down-regulated
RYR2	Pig	9.95411e-08	-5.52229	7	213	0.00363773	Down-regulated
ITPR2	Pig	1.19882e-07	-1.50699	169	596	0.0043811	Down-regulated
BCAT2	Pig	1.34846e-07	-3.49713	27	277	0.00492797	Down-regulated
LPL	Pig	1.3911e-07	-2.0707	74	404	0.00508377	Down-regulated
GRK4	Pig	1.39975e-07	-3.99623	0.02	255	0.00511537	Down-regulated
CORO2B	Pig	1.4431e-07	-1.80879	392	787	0.00527379	Down-regulated
MTARC2	Pig	1.49927e-07	-2.62175	34	298	0.00547908	Down-regulated
RIN2	Pig	1.49927e-07	-2.55842	34	298	0.00547908	Down-regulated
GPC3	Pig	1.59003e-07	-3.31672	27	277	0.00581076	Down-regulated
MMUT	Pig	1.78601e-07	-3.1481	0.02	255	0.00652696	Down-regulated
PRKD1	Pig	1.80813e-07	-2.26891	34	298	0.00660779	Down-regulated
PXN	Pig	1.86657e-07	-2.19433	122	489	0.00682136	Down-regulated
COL3A1	Pig	1.92064e-07	-0.87611	426	872	0.007019	Down-regulated
COX1	Pig	2.07084e-07	-1.85386	108	447	0.0075679	Down-regulated
PRKAR1B	Pig	2.6865e-07	-2.61185	54	0.34	0.00981782	Down-regulated
ADGRA2	Pig	3.08441e-07	-2.27649	54	0.34	0.011272	Down-regulated
LTBP4	Pig	3.28351e-07	-6.62511	0	0.17	0.0119996	Down-regulated
VAV3	Pig	3.28351e-07	-7.344	0	0.17	0.0119996	Down-regulated
IGF2	Pig	3.28351e-07	-7.15002	0	0.17	0.0119996	Down-regulated
PCCA	Pig	3.76521e-07	-1.80414	162	532	0.01376	Down-regulated
PSD3	Pig	3.87891e-07	-1.35502	378	766	0.0141755	Down-regulated
TLN2	Pig	4.01074e-07	-1.5464	135	489	0.0146573	Down-regulated
THSD7A	Pig	4.23537e-07	-1.74782	122	489	0.0154781	Down-regulated
ENSSSCG00000033189	Pig	5.03732e-07	-3.23703	34	277	0.0184089	Down-regulated
PAQR8	Pig	5.1083e-07	-1.53569	101	447	0.0186683	Down-regulated
EXT1	Pig	5.54023e-07	-1.67826	324	723	0.0202468	Down-regulated
PTPRB	Pig	5.65832e-07	-5.73302	7	191	0.0206783	Down-regulated
ITGA9	Pig	5.68615e-07	-4.45445	0.02	234	0.02078	Down-regulated
L1CAM	Pig	5.79916e-07	-2.49558	68	362	0.021193	Down-regulated
RNF157	Pig	6.13225e-07	-5.00907	7	191	0.0224103	Down-regulated
ENSSSCG00000027046	Pig	6.32838e-07	-1.65645	149	511	0.0231271	Down-regulated
RAPGEF5	Pig	6.61119e-07	-1.31146	0.23	0.66	0.0241606	Down-regulated
ST3GAL4	Pig	6.64433e-07	-4.65765	7	191	0.0242817	Down-regulated
RIPOR2	Pig	7.1975e-07	-4.09687	7	191	0.0263033	Down-regulated
NPTX2	Pig	7.49046e-07	-3.75992	7	191	0.0273739	Down-regulated
MROH1	Pig	7.65569e-07	-2.59199	61	0.34	0.0279777	Down-regulated
ENOX1	Pig	7.80828e-07	-3.13085	27	255	0.0285353	Down-regulated
REV3L	Pig	8.3698e-07	-1.36542	284	0.66	0.0305874	Down-regulated
RCSD1	Pig	8.73308e-07	-3.7769	14	213	0.031915	Down-regulated
ATP6V0A1	Pig	8.99338e-07	-2.65837	54	319	0.0328663	Down-regulated
PREX1	Pig	9.49211e-07	-1.93535	128	468	0.0346889	Down-regulated
PLCE1	Pig	1.20198e-06	-0.932355	568	915	0.0439262	Down-regulated
SORCS2	Pig	1.36028e-06	-1.52953	169	532	0.0497115	Down-regulated

## Sheet: Pericytes
gene	Species	p_val	avg_log2FC	pct. 1	pct.2	p_val_adj	level
KIT	Pig	1.3089e-35	7.4037	713	18	4.78337e-31	Up-regulated
C7	Pig	6.22019e-27	6.94614	603	18	2.27317e-22	Up-regulated
ITPR1	Pig	1.53503e-26	2.0598	863	425	5.60975e-22	Up-regulated
ENSSSCG00000022925	Pig	2.13836e-26	4.43203	638	71	7.81465e-22	Up-regulated
PLSCR4	Pig	3.11248e-25	2.27414	799	292	1.13746e-20	Up-regulated
THSD4	Pig	1.42489e-24	4.79616	591	35	5.20726e-20	Up-regulated
MX2	Pig	2.52242e-22	6.38062	528	9	9.21818e-18	Up-regulated
IGFBP7	Pig	2.4154e-21	1.55593	906	575	8.82708e-17	Up-regulated
PLOD2	Pig	2.73525e-21	3.68076	609	106	9.99597e-17	Up-regulated
SLC7A2	Pig	6.32047e-21	3.67782	571	71	2.30982e-16	Up-regulated
ENSSSCG00000016263	Pig	1.25551e-20	5.3331	516	27	4.58828e-16	Up-regulated
ARHGAP42	Pig	5.08804e-20	2.33425	712	292	1.85942e-15	Up-regulated
SLC39A14	Pig	7.02642e-20	1.9241	724	239	2.5678e-15	Up-regulated
IFI44L	Pig	9.23099e-20	3.68604	525	35	3.37346e-15	Up-regulated
ENSSSCG00000034570	Pig	2.64225e-19	4.442	515	35	9.65611e-15	Up-regulated
OAS2	Pig	4.13718e-19	3.26351	551	71	1.51193e-14	Up-regulated
EDNRA	Pig	7.24193e-19	9.12013	457	0	2.64656e-14	Up-regulated
SOX5	Pig	2.11741e-18	1.09947	933	788	7.73806e-14	Up-regulated
HIF1A	Pig	9.79072e-18	2.94554	563	106	3.57802e-13	Up-regulated
DYNC1I1	Pig	1.39575e-17	6.49584	444	9	5.10078e-13	Up-regulated
UGP2	Pig	4.73661e-17	6.26625	434	9	1.73099e-12	Up-regulated
SETX	Pig	5.09975e-17	2.51147	576	115	1.8637e-12	Up-regulated
F3	Pig	6.04186e-17	9.28348	421	0	2.208e-12	Up-regulated
RCSD1	Pig	9.93978e-17	2.62116	551	88	3.63249e-12	Up-regulated
STK39	Pig	2.24157e-16	1.54966	794	434	8.1918e-12	Up-regulated
ABHD2	Pig	1.01997e-15	6.09135	409	9	3.72747e-11	Up-regulated
MBNL1	Pig	1.62291e-15	1.65912	729	327	5.93092e-11	Up-regulated
ADAMTS9	Pig	2.20329e-15	2.08828	674	265	8.05193e-11	Up-regulated
HERC6	Pig	4.05033e-15	2.63372	501	88	1.48019e-10	Up-regulated
FUT8	Pig	6.23666e-15	2.33133	497	0.08	2.27919e-10	Up-regulated
PAPPA	Pig	6.98608e-15	2.87545	542	142	2.55306e-10	Up-regulated
FAM13A	Pig	7.05491e-15	2.27661	563	133	2.57822e-10	Up-regulated
CLIP1	Pig	1.00311e-14	2.02222	0.63	221	3.66586e-10	Up-regulated
MAGI1	Pig	1.30562e-14	1.41049	752	336	4.77138e-10	Up-regulated
RSAD2	Pig	1.47567e-14	8.78173	373	0	5.39283e-10	Up-regulated
PPP3CA	Pig	2.2762e-14	1.39286	669	265	8.31839e-10	Up-regulated
MX1	Pig	2.35116e-14	3.9681	409	27	8.59231e-10	Up-regulated
FKBP5	Pig	4.23557e-14	1.14986	865	566	1.54789e-09	Up-regulated
FAM13C	Pig	5.137e-14	3.2723	441	53	1.87732e-09	Up-regulated
NRP1	Pig	5.24516e-14	1.05747	875	531	1.91684e-09	Up-regulated
GPM6B	Pig	6.9087e-14	2.93093	449	71	2.52478e-09	Up-regulated
PRR16	Pig	1.02539e-13	4.19765	395	27	3.7473e-09	Up-regulated
GPC5	Pig	1.11426e-13	10.4166	354	0	4.07206e-09	Up-regulated
HGF	Pig	1.71899e-13	3.18667	457	0.08	6.28205e-09	Up-regulated
KHDRBS3	Pig	2.99107e-13	8.99956	345	0	1.09308e-08	Up-regulated
SPRED1	Pig	9.24505e-13	1.81574	559	159	3.3786e-08	Up-regulated
PDGFC	Pig	1.04107e-12	8.76096	332	0	3.8046e-08	Up-regulated
USP25	Pig	1.53167e-12	1.45781	611	204	5.59748e-08	Up-regulated
OSMR	Pig	1.68808e-12	3.1283	395	44	6.16908e-08	Up-regulated
HIVEP2	Pig	1.70904e-12	1.31659	724	363	6.24567e-08	Up-regulated
ADGRF5	Pig	1.80371e-12	1.63722	575	177	6.59164e-08	Up-regulated
ZNFX1	Pig	2.1741e-12	2.08203	412	53	7.94525e-08	Up-regulated
HERC5	Pig	2.58013e-12	3.11576	382	35	9.42909e-08	Up-regulated
PTPN13	Pig	2.92467e-12	1.25206	704	301	1.06882e-07	Up-regulated
EIF2AK2	Pig	3.56552e-12	2.01889	485	124	1.30302e-07	Up-regulated
PARP12	Pig	4.04279e-12	3.21798	375	35	1.47744e-07	Up-regulated
CACNA2D1	Pig	4.36051e-12	1.38981	733	398	1.59355e-07	Up-regulated
PID1	Pig	4.49837e-12	1.31349	0.76	469	1.64393e-07	Up-regulated
IGF1	Pig	4.51387e-12	4.64278	345	18	1.64959e-07	Up-regulated
ENSSSCG00000001341	Pig	4.56905e-12	3.34484	391	53	1.66976e-07	Up-regulated
RAI14	Pig	5.47876e-12	3.84199	367	35	2.00221e-07	Up-regulated
STK38L	Pig	5.85964e-12	1.49279	649	283	2.14141e-07	Up-regulated
NHSL1	Pig	5.92274e-12	2.16531	475	115	2.16447e-07	Up-regulated
CAMK2D	Pig	8.03856e-12	1.35996	702	381	2.93769e-07	Up-regulated
LTBP1	Pig	1.27444e-11	1.36911	724	407	4.65744e-07	Up-regulated
ISG12(A)	Pig	1.33478e-11	4.19782	336	18	4.87794e-07	Up-regulated
RUNX1	Pig	1.42317e-11	3.7068	358	35	5.20096e-07	Up-regulated
CHSY3	Pig	1.45272e-11	2.75532	438	106	5.30898e-07	Up-regulated
STOM	Pig	1.9141e-11	2.33942	464	115	6.99508e-07	Up-regulated
HIPK3	Pig	2.37123e-11	1.84608	546	186	8.66566e-07	Up-regulated
IGFBP2	Pig	3.74943e-11	3.86251	328	18	1.37023e-06	Up-regulated
STAT1	Pig	4.56178e-11	1.37866	535	0.15	1.6671e-06	Up-regulated
USP18	Pig	4.97389e-11	3.94582	324	18	1.81771e-06	Up-regulated
USP6NL	Pig	8.02249e-11	2.75682	351	35	2.93182e-06	Up-regulated
TANC1	Pig	8.65957e-11	3.32365	351	44	3.16464e-06	Up-regulated
ATP8B1	Pig	9.45312e-11	3.42709	349	44	3.45464e-06	Up-regulated
PRKN	Pig	9.79554e-11	1.49475	584	248	3.57978e-06	Up-regulated
ELL2	Pig	1.01445e-10	3.43592	332	27	3.7073e-06	Up-regulated
DACH1	Pig	1.06459e-10	3.18699	366	53	3.89056e-06	Up-regulated
CTTNBP2	Pig	1.22177e-10	2.78452	444	133	4.46494e-06	Up-regulated
ASCC3	Pig	1.24044e-10	2.00732	0.46	124	4.5332e-06	Up-regulated
MAP3K5	Pig	1.54082e-10	1.70989	572	239	5.63093e-06	Up-regulated
AAK1	Pig	1.79558e-10	1.90642	471	133	6.56195e-06	Up-regulated
SNX10	Pig	1.89175e-10	2.40555	0.37	53	6.91339e-06	Up-regulated
ENSSSCG00000001229	Pig	1.8935e-10	2.01784	456	124	6.91981e-06	Up-regulated
GCNT2	Pig	2.69748e-10	2.99673	346	44	9.85796e-06	Up-regulated
MSRB3	Pig	3.67837e-10	2.41201	403	97	1.34426e-05	Up-regulated
COL12A1	Pig	4.15571e-10	2.39659	307	18	1.5187e-05	Up-regulated
ADD3	Pig	4.40881e-10	1.72724	517	186	1.6112e-05	Up-regulated
REXO2	Pig	5.40134e-10	2.02905	424	97	1.97392e-05	Up-regulated
LIFR	Pig	5.50601e-10	1.13457	684	327	2.01217e-05	Up-regulated
AP3B1	Pig	5.83395e-10	1.64434	466	133	2.13202e-05	Up-regulated
ENSSSCG00000017146	Pig	6.04426e-10	1.69376	485	0.15	2.20887e-05	Up-regulated
ANO3	Pig	6.37684e-10	3.01339	382	88	2.33042e-05	Up-regulated
ARAP2	Pig	6.73587e-10	1.31431	535	177	2.46162e-05	Up-regulated
MTUS1	Pig	7.24844e-10	2.09411	426	106	2.64894e-05	Up-regulated
ZNF292	Pig	8.18955e-10	2.06607	393	0.08	2.99287e-05	Up-regulated
TBC1D5	Pig	8.82691e-10	1.08808	646	292	3.22579e-05	Up-regulated
COMMD6	Pig	1.03738e-09	1.52554	543	239	3.7911e-05	Up-regulated
CTSC	Pig	1.04807e-09	5.05832	275	9	3.83017e-05	Up-regulated
CHST15	Pig	1.42359e-09	5.6957	271	9	5.20252e-05	Up-regulated
CDC14A	Pig	1.75008e-09	1.83969	391	0.08	6.39568e-05	Up-regulated
SLC24A3	Pig	1.93261e-09	1.73095	0.41	106	7.06273e-05	Up-regulated
ADAMTS3	Pig	1.94923e-09	4.39092	271	9	7.12345e-05	Up-regulated
CDH13	Pig	2.06849e-09	3.01676	336	53	7.5593e-05	Up-regulated
CHSY1	Pig	2.79718e-09	1.85638	425	115	0.000102223	Up-regulated
PI15	Pig	2.95511e-09	9.71652	249	0	0.000107994	Up-regulated
ANKRD17	Pig	3.1862e-09	1.30009	582	274	0.00011644	Up-regulated
MMD	Pig	3.33065e-09	7.83287	248	0	0.000121719	Up-regulated
YAP1	Pig	3.34636e-09	1.57891	488	168	0.000122293	Up-regulated
FBXO30	Pig	3.39651e-09	2.76237	327	53	0.000124126	Up-regulated
NBR1	Pig	3.56246e-09	2.3033	349	62	0.00013019	Up-regulated
FBXO32	Pig	3.75295e-09	7.72426	247	0	0.000137151	Up-regulated
GPHN	Pig	3.90551e-09	1.06247	0.7	389	0.000142727	Up-regulated
DDIT4	Pig	4.25119e-09	2.47785	319	44	0.00015536	Up-regulated
PRKD1	Pig	4.46656e-09	3.44333	318	53	0.00016323	Up-regulated
ENSSSCG00000010893	Pig	4.5647e-09	2.59862	0.33	53	0.000166817	Up-regulated
MARK3	Pig	4.94095e-09	1.11846	601	257	0.000180567	Up-regulated
NCKAP1	Pig	5.89226e-09	1.24435	527	186	0.000215333	Up-regulated
HSP90AA1	Pig	5.90839e-09	2.30125	353	71	0.000215922	Up-regulated
DDX60	Pig	6.04583e-09	5.31804	255	9	0.000220945	Up-regulated
FMO4	Pig	6.4683e-09	2.31554	355	0.08	0.000236384	Up-regulated
BST2	Pig	6.68589e-09	4.2565	257	9	0.000244336	Up-regulated
MAN1A1	Pig	6.8536e-09	2.664	0.29	27	0.000250465	Up-regulated
NLK	Pig	7.70669e-09	2.92462	307	44	0.000281641	Up-regulated
SPATA5	Pig	8.14761e-09	1.37338	479	159	0.000297755	Up-regulated
LRP12	Pig	8.70461e-09	4.46992	275	27	0.00031811	Up-regulated
USP15	Pig	1.05643e-08	1.36434	507	186	0.000386072	Up-regulated
ERC1	Pig	1.11014e-08	1.34885	517	204	0.000405702	Up-regulated
PARP8	Pig	1.11524e-08	2.00722	378	88	0.000407566	Up-regulated
ETV6	Pig	1.16651e-08	1.02473	672	354	0.000426303	Up-regulated
ADGRL2	Pig	1.18644e-08	1.30323	519	204	0.000433585	Up-regulated
CAST	Pig	1.33811e-08	3.48339	275	27	0.000489014	Up-regulated
ENSSSCG00000014280	Pig	1.3476e-08	1.77068	0.45	159	0.000492479	Up-regulated
TMEM150C	Pig	1.37784e-08	1.78518	338	62	0.000503533	Up-regulated
ENSSSCG00000029160	Pig	1.49714e-08	4.25239	248	9	0.00054713	Up-regulated
PLEKHA2	Pig	1.50158e-08	1.3966	575	265	0.000548752	Up-regulated
DENND5B	Pig	1.57167e-08	2.23365	363	88	0.000574366	Up-regulated
TBL1XR1	Pig	1.57904e-08	1.27151	525	212	0.00057706	Up-regulated
ADAM12	Pig	1.57944e-08	3.3311	276	27	0.000577206	Up-regulated
SND1	Pig	1.59389e-08	1.60174	408	115	0.000582488	Up-regulated
VMP1	Pig	1.60317e-08	1.41861	481	177	0.000585879	Up-regulated
SDCBP	Pig	1.62226e-08	1.57624	347	71	0.000592857	Up-regulated
PEAK1	Pig	1.77374e-08	1.40722	595	292	0.000648214	Up-regulated
SLC20A2	Pig	1.78305e-08	4.11142	259	18	0.000651617	Up-regulated
FSTL5	Pig	2.06525e-08	5.70972	241	9	0.000754746	Up-regulated
ZNF662	Pig	2.07145e-08	2.76364	311	53	0.00075701	Up-regulated
USP24	Pig	2.07982e-08	1.67521	466	186	0.000760071	Up-regulated
GLG1	Pig	2.27656e-08	1.18044	566	248	0.000831971	Up-regulated
EFR3B	Pig	2.34473e-08	2.35461	357	88	0.000856881	Up-regulated
PLPP1	Pig	2.49856e-08	1.07719	0.65	398	0.000913099	Up-regulated
SMYD3	Pig	2.51395e-08	1.05729	554	239	0.000918722	Up-regulated
SSBP2	Pig	2.8959e-08	1.05159	657	354	0.00105831	Up-regulated
ZCCHC7	Pig	2.91502e-08	1.08483	592	265	0.00106529	Up-regulated
MDFIC	Pig	2.97304e-08	1.31139	421	115	0.0010865	Up-regulated
EPSTI1	Pig	3.15615e-08	2.68032	296	44	0.00115341	Up-regulated
DLG1	Pig	3.64018e-08	1.02024	485	159	0.00133031	Up-regulated
IL4R	Pig	3.68926e-08	4.72696	236	9	0.00134824	Up-regulated
ENAH	Pig	4.01906e-08	1.12546	661	363	0.00146876	Up-regulated
ISG15	Pig	4.06782e-08	5.04875	235	9	0.00148658	Up-regulated
MGMT	Pig	4.55592e-08	1.29535	527	212	0.00166496	Up-regulated
MBD2	Pig	4.79809e-08	1.42699	403	115	0.00175346	Up-regulated
TBC1D1	Pig	4.89264e-08	1.36506	528	239	0.00178802	Up-regulated
PIK3CA	Pig	5.29567e-08	1.79159	393	115	0.0019353	Up-regulated
ZNF654	Pig	6.21494e-08	1.87808	315	62	0.00227125	Up-regulated
PHKB	Pig	6.29407e-08	1.49578	457	168	0.00230017	Up-regulated
AKAP6	Pig	6.31978e-08	1.40229	432	0.15	0.00230956	Up-regulated
CPEB4	Pig	6.88897e-08	1.91204	315	62	0.00251758	Up-regulated
HERC4	Pig	7.06827e-08	1.67935	418	142	0.0025831	Up-regulated
RCOR1	Pig	7.09732e-08	1.936	382	115	0.00259372	Up-regulated
EXOC4	Pig	7.32479e-08	0.767184	804	531	0.00267684	Up-regulated
LCLAT1	Pig	9.5845e-08	2.54206	336	88	0.00350265	Up-regulated
DTX3L	Pig	9.5923e-08	7.33163	209	0	0.00350551	Up-regulated
PKM	Pig	9.5923e-08	6.76705	209	0	0.00350551	Up-regulated
ZMAT3	Pig	9.59231e-08	7.20171	209	0	0.00350551	Up-regulated
ARL13B	Pig	1.04029e-07	1.44091	355	88	0.00380174	Up-regulated
TRPM7	Pig	1.0734e-07	1.14192	508	212	0.00392273	Up-regulated
CBLB	Pig	1.13275e-07	1.02686	689	407	0.00413963	Up-regulated
PARP14	Pig	1.2664e-07	3.31469	237	18	0.00462807	Up-regulated
GPC6	Pig	1.30101e-07	0.81758	483	186	0.00475452	Up-regulated
RGS4	Pig	1.33183e-07	3.84009	223	9	0.00486718	Up-regulated
KLHL24	Pig	1.56018e-07	2.83209	252	27	0.00570167	Up-regulated
ENSSSCG00000035751	Pig	1.57347e-07	4.64463	218	9	0.00575025	Up-regulated
CHRM2	Pig	1.67737e-07	7.43583	202	0	0.00612993	Up-regulated
DDR2	Pig	1.6787e-07	1.53221	428	0.15	0.00613481	Up-regulated
ACSL3	Pig	1.68088e-07	1.79657	425	159	0.00614277	Up-regulated
PLEKHA5	Pig	1.68243e-07	1.18784	517	0.23	0.00614845	Up-regulated
NEK7	Pig	1.79792e-07	1.03505	521	0.23	0.00657051	Up-regulated
ZFAND3	Pig	1.81898e-07	0.735066	812	584	0.00664748	Up-regulated
IFI44	Pig	1.82395e-07	1.26269	324	71	0.00666563	Up-regulated
PCMTD1	Pig	1.86458e-07	1.85194	346	88	0.00681411	Up-regulated
IRS1	Pig	2.15381e-07	2.70133	296	62	0.0078711	Up-regulated
REEP3	Pig	2.20699e-07	1.69429	401	142	0.00806545	Up-regulated
LRIG1	Pig	2.23485e-07	1.52632	366	106	0.00816725	Up-regulated
SNAPC1	Pig	2.26976e-07	2.51473	273	44	0.00829484	Up-regulated
NSD3	Pig	2.28025e-07	1.2572	446	159	0.00833318	Up-regulated
LRP6	Pig	2.2829e-07	0.987827	457	159	0.00834287	Up-regulated
RGS2	Pig	2.32348e-07	4.03304	228	18	0.00849117	Up-regulated
GNAI1	Pig	2.33334e-07	1.41062	438	168	0.00852718	Up-regulated
HK1	Pig	2.36593e-07	1.60932	0.31	62	0.00864629	Up-regulated
ARNTL2	Pig	2.84028e-07	4.59723	212	9	0.0103798	Up-regulated
LPP	Pig	2.88336e-07	0.602912	893	708	0.0105372	Up-regulated
TP53INP1	Pig	2.90175e-07	1.98743	275	44	0.0106044	Up-regulated
KANSL1	Pig	2.97752e-07	0.968271	631	336	0.0108814	Up-regulated
ST3GAL6	Pig	3.0406e-07	1.88356	273	44	0.0111119	Up-regulated
FAM214A	Pig	3.13267e-07	1.03993	489	204	0.0114483	Up-regulated
MFHAS1	Pig	3.28041e-07	1.97598	339	97	0.0119883	Up-regulated
ST8SIA4	Pig	3.46688e-07	1.86381	322	0.08	0.0126697	Up-regulated
ACSL4	Pig	3.65984e-07	1.43422	402	133	0.0133749	Up-regulated
SYCP2	Pig	3.70969e-07	2.36972	0.31	0.08	0.0135571	Up-regulated
FAF1	Pig	3.73146e-07	1.17082	497	212	0.0136366	Up-regulated
C1orf21	Pig	3.78484e-07	1.24207	528	283	0.0138317	Up-regulated
TGFBR3	Pig	3.84372e-07	1.3076	509	239	0.0140469	Up-regulated
ITGAV	Pig	3.89619e-07	1.9589	298	62	0.0142386	Up-regulated
ACCSL	Pig	3.90126e-07	1.38203	491	0.23	0.0142571	Up-regulated
TEX14	Pig	4.00399e-07	2.69672	255	35	0.0146326	Up-regulated
OLFM3	Pig	4.05276e-07	9.00948	192	0	0.0148108	Up-regulated
PLSCR1	Pig	4.1785e-07	1.43482	331	88	0.0152703	Up-regulated
ZMYM4	Pig	4.22147e-07	1.44141	366	106	0.0154274	Up-regulated
SLC38A2	Pig	4.47779e-07	1.68765	389	133	0.0163641	Up-regulated
NFIB	Pig	4.71327e-07	1.21538	598	327	0.0172246	Up-regulated
UBE2R2	Pig	4.71572e-07	1.53234	438	177	0.0172336	Up-regulated
GALK2	Pig	4.84681e-07	1.26087	0.3	62	0.0177127	Up-regulated
ENSSSCG00000016868	Pig	4.93088e-07	2.42067	279	53	0.0180199	Up-regulated
ELF2	Pig	5.31036e-07	1.38109	434	168	0.0194067	Up-regulated
KCNQ5	Pig	5.50591e-07	7.10886	201	9	0.0201214	Up-regulated
LRRFIP1	Pig	5.64831e-07	1.22002	586	319	0.0206417	Up-regulated
B2M	Pig	5.72606e-07	1.34594	408	142	0.0209259	Up-regulated
ADCY3	Pig	5.75417e-07	1.48884	378	115	0.0210286	Up-regulated
CRISPLD2	Pig	5.98299e-07	2.16965	264	44	0.0218648	Up-regulated
ACAP2	Pig	6.09358e-07	0.927957	0.56	257	0.022269	Up-regulated
GLIS3	Pig	6.14942e-07	2.12989	377	142	0.0224731	Up-regulated
TIMP1	Pig	6.26554e-07	7.29971	186	0	0.0228974	Up-regulated
NFKBIZ	Pig	6.33409e-07	2.58879	248	35	0.0231479	Up-regulated
FOXS1	Pig	7.06397e-07	3.53754	217	18	0.0258153	Up-regulated
RHOT1	Pig	7.08261e-07	2.79899	255	44	0.0258834	Up-regulated
ARFGEF1	Pig	7.35498e-07	1.34621	444	177	0.0268788	Up-regulated
MITF	Pig	7.53654e-07	1.93507	369	133	0.0275423	Up-regulated
RASL12	Pig	7.62353e-07	2.76481	217	18	0.0278602	Up-regulated
TRIM22	Pig	7.65673e-07	1.42313	272	53	0.0279815	Up-regulated
KLHL29	Pig	7.68116e-07	2.16924	259	44	0.0280708	Up-regulated
ZC3HAV1	Pig	7.72766e-07	2.94259	232	27	0.0282407	Up-regulated
TNRC6A	Pig	7.79399e-07	0.817908	517	221	0.0284832	Up-regulated
TTC7B	Pig	8.31609e-07	0.784787	747	478	0.0303912	Up-regulated
ZBTB38	Pig	8.4337e-07	1.57819	377	124	0.030821	Up-regulated
NOL11	Pig	8.65461e-07	1.07859	653	389	0.0316283	Up-regulated
MBD5	Pig	8.87082e-07	0.865977	564	274	0.0324184	Up-regulated
RESF1	Pig	9.10402e-07	1.33546	0.33	88	0.0332706	Up-regulated
BABAM2	Pig	9.18403e-07	1.31914	489	221	0.0335631	Up-regulated
RBFOX2	Pig	9.38565e-07	1.06796	531	265	0.0342998	Up-regulated
FAM120A	Pig	9.45353e-07	1.48291	339	97	0.0345479	Up-regulated
PAPSS1	Pig	1.0709e-06	2.87786	239	35	0.0391362	Up-regulated
SENP6	Pig	1.09839e-06	0.84728	548	265	0.0401407	Up-regulated
ZCCHC24	Pig	1.09955e-06	0.726421	586	274	0.040183	Up-regulated
ENSSSCG00000022128	Pig	1.1204e-06	2.22898	264	53	0.0409452	Up-regulated
DYRK1A	Pig	1.1287e-06	1.08968	588	327	0.0412483	Up-regulated
GTF2A1L	Pig	1.22303e-06	2.67838	225	27	0.0446957	Up-regulated
UBR1	Pig	1.30848e-06	1.04515	475	204	0.0478185	Up-regulated
SPATS2L	Pig	1.31305e-06	0.937087	555	274	0.0479855	Up-regulated
PPP2R5E	Pig	1.31373e-06	1.17032	496	0.23	0.0480102	Up-regulated
DNAJB4	Pig	1.33396e-06	1.44012	355	115	0.0487497	Up-regulated
NR6A1	Pig	1.33816e-06	3.07658	223	27	0.0489031	Up-regulated
CD55	Human	5.42501e-73	-6.44923	21	531	1.98257e-68	Down-regulated
NTN4	Pig	2.61888e-54	-5.14506	0.11	655	9.57071e-50	Down-regulated
PLCB4	Pig	1.51608e-48	-3.14282	324	858	5.54052e-44	Down-regulated
TTN	Pig	3.07463e-42	-3.15986	154	673	1.12362e-37	Down-regulated
CREB5	Pig	3.34401e-39	-3.12848	197	699	1.22207e-34	Down-regulated
SYNPO2	Pig	7.5114e-34	-2.40752	622	903	2.74504e-29	Down-regulated
PDE4D	Pig	1.42733e-32	-3.29526	223	664	5.21618e-28	Down-regulated
GRM7	Pig	4.88097e-32	-2.15761	458	885	1.78375e-27	Down-regulated
FRMD4B	Pig	5.00444e-28	-6.30354	5	195	1.82887e-23	Down-regulated
SH3RF2	Pig	3.46945e-27	-4.99623	43	327	1.26791e-22	Down-regulated
ENSSSCG00000005518	Pig	7.90396e-27	-2.95989	295	664	2.8885e-22	Down-regulated
ENSSSCG00000012101	Pig	1.7433e-26	-6.45745	11	212	6.37089e-22	Down-regulated
ABCA8	Pig	4.58608e-25	-4.13045	38	301	1.67598e-20	Down-regulated
P3H2	Pig	1.25402e-23	-1.93386	519	832	4.58282e-19	Down-regulated
DAAM2	Pig	5.28427e-23	-1.90594	571	823	1.93114e-18	Down-regulated
EXT1	Pig	2.24303e-22	-1.32219	806	912	8.19716e-18	Down-regulated
SPARCL1	Pig	2.73692e-22	-2.26271	382	699	1.00021e-17	Down-regulated
MME	Pig	5.94273e-22	-7.87097	1	133	2.17177e-17	Down-regulated
ENSSSCG00000009672	Pig	6.47565e-22	-7.3653	3	142	2.36653e-17	Down-regulated
RBPMS	Pig	8.81318e-22	-1.19094	863	956	3.22078e-17	Down-regulated
PDE10A	Pig	1.29541e-21	-1.3678	802	956	4.73409e-17	Down-regulated
THRB	Pig	1.65189e-21	-3.12437	46	301	6.03684e-17	Down-regulated
GRIK4	Pig	4.76799e-21	-3.63274	68	345	1.74246e-16	Down-regulated
TIMP3	Pig	1.30934e-19	-2.53825	366	673	4.785e-15	Down-regulated
ENPEP	Pig	6.6241e-19	-2.28715	335	646	2.42078e-14	Down-regulated
SF3B1	Pig	2.30163e-18	-1.83303	445	708	8.4113e-14	Down-regulated
SOX13	Pig	3.60609e-18	-2.42966	318	619	1.31785e-13	Down-regulated
LPAR1	Pig	8.25416e-18	-5.48043	5	133	3.01648e-13	Down-regulated
RCAN2	Pig	2.06287e-17	-2.5668	138	442	7.53877e-13	Down-regulated
ENSSSCG00000038192	Pig	2.06908e-17	-6.02517	3	115	7.56144e-13	Down-regulated
AUTS2	Pig	3.4787e-17	-1.44905	567	796	1.27129e-12	Down-regulated
EPAS1	Pig	2.21598e-16	-2.1723	283	584	8.09829e-12	Down-regulated
GPC3	Pig	2.90103e-16	-3.02978	86	336	1.06018e-11	Down-regulated
ARHGAP10	Pig	4.9716e-16	-1.02014	834	947	1.81687e-11	Down-regulated
EGFLAM	Pig	6.69221e-16	-1.45185	725	876	2.44567e-11	Down-regulated
TNXB	Pig	9.44068e-15	-6.066	4	106	3.4501e-10	Down-regulated
CD163	Pig	9.7047e-15	-9.12055	0	0.08	3.54658e-10	Down-regulated
CABLES1	Pig	3.51624e-14	-2.23704	212	487	1.28501e-09	Down-regulated
ANTXR1	Pig	3.87957e-14	-2.01895	328	593	1.41779e-09	Down-regulated
MEF2C	Pig	9.44724e-14	-1.7457	476	708	3.45249e-09	Down-regulated
RORA	Pig	1.14402e-13	-0.947459	849	938	4.18081e-09	Down-regulated
RGS6	Pig	1.35387e-13	-2.26782	135	398	4.94773e-09	Down-regulated
GEM	Pig	8.82809e-13	-2.73182	98	319	3.22623e-08	Down-regulated
ST6GALNAC3	Pig	1.30931e-12	-4.25607	19	0.15	4.78487e-08	Down-regulated
NTF3	Pig	2.61268e-12	-2.93706	115	336	9.54803e-08	Down-regulated
ABCA6	Pig	6.40275e-12	-5.66716	4	88	2.33989e-07	Down-regulated
ENSSSCG00000016810	Pig	7.28169e-12	-1.8806	129	363	2.66109e-07	Down-regulated
IGF2	Pig	1.10052e-11	-6.25646	3	0.08	4.02187e-07	Down-regulated
HMCN2	Pig	1.16614e-11	-5.32067	3	0.08	4.26165e-07	Down-regulated
ENSSSCG00000042498	Pig	1.58726e-11	-4.27323	11	115	5.80064e-07	Down-regulated
SCN7A	Pig	1.65509e-11	-4.26784	11	115	6.04854e-07	Down-regulated
KLHL13	Pig	1.83187e-11	-5.14984	13	124	6.69458e-07	Down-regulated
RNF180	Pig	4.08389e-11	-1.99893	233	478	1.49246e-06	Down-regulated
DMD	Pig	4.88303e-11	-1.35724	432	637	1.7845e-06	Down-regulated
MFAP5	Pig	7.90662e-11	-4.10819	12	115	2.88947e-06	Down-regulated
TPM1	Pig	1.51255e-10	-1.07022	737	858	5.5276e-06	Down-regulated
PIK3R1	Pig	1.74994e-10	-1.30342	513	673	6.39516e-06	Down-regulated
STXBP6	Pig	1.88654e-10	-3.69479	8	97	6.89436e-06	Down-regulated
PDZRN4	Pig	1.90134e-10	-2.18791	0.15	372	6.94846e-06	Down-regulated
RECK	Pig	2.13005e-10	-2.58957	181	398	7.78428e-06	Down-regulated
GUCY1B1	Pig	2.26899e-10	-1.20035	523	708	8.29203e-06	Down-regulated
COLEC12	Pig	2.64293e-10	-2.38009	78	265	9.65858e-06	Down-regulated
A2M	Pig	5.40965e-10	-2.91451	88	274	1.97696e-05	Down-regulated
FILIP1L	Pig	1.37896e-09	-1.85318	347	531	5.03939e-05	Down-regulated
ENSSSCG00000010440	Pig	1.4203e-09	-1.24129	0.63	735	5.19049e-05	Down-regulated
DNM1	Pig	1.51186e-09	-5.16675	5	0.08	5.52509e-05	Down-regulated
ASPN	Pig	2.04342e-09	-2.60562	84	257	7.46766e-05	Down-regulated
ADAMTSL3	Pig	2.15439e-09	-2.94482	43	186	7.87323e-05	Down-regulated
CD4	Pig	3.26538e-09	-3.17145	19	124	0.000119333	Down-regulated
DENND2A	Pig	3.76126e-09	-1.37824	402	575	0.000137455	Down-regulated
ALDH1A2	Pig	4.75223e-09	-3.57684	13	106	0.00017367	Down-regulated
ATP1A2	Pig	7.22754e-09	-2.21794	29	0.15	0.00026413	Down-regulated
TSEN15	Pig	8.19917e-09	-1.50973	394	575	0.000299639	Down-regulated
DTX4	Pig	8.99705e-09	-4.39727	17	115	0.000328797	Down-regulated
CYTH3	Pig	9.30004e-09	-1.01663	775	814	0.00033987	Down-regulated
phTBM	Pig	9.34129e-09	-5.46045	7	0.08	0.000341377	Down-regulated
PLCL1	Pig	9.46247e-09	-1.1881	641	761	0.000345806	Down-regulated
PAPLN	Pig	9.99801e-09	-2.55986	106	283	0.000365377	Down-regulated
PARD6G	Pig	1.20612e-08	-3.40349	48	186	0.000440776	Down-regulated
HSPG2	Pig	1.31718e-08	-2.36894	0.19	381	0.000481362	Down-regulated
PTPRF	Pig	1.78925e-08	-3.22914	36	159	0.000653881	Down-regulated
MYO1B	Pig	2.04543e-08	-0.668471	832	912	0.000747503	Down-regulated
ZNF385D	Pig	2.64209e-08	-2.89425	68	221	0.000965551	Down-regulated
FERMT2	Pig	3.55016e-08	-1.66398	508	619	0.00129741	Down-regulated
FHL5	Pig	3.78533e-08	-2.19131	214	398	0.00138335	Down-regulated
LDB2	Pig	4.17394e-08	-1.23567	635	726	0.00152537	Down-regulated
RAPGEF4	Pig	5.03698e-08	-4.07987	13	97	0.00184076	Down-regulated
ENSSSCG00000009125	Pig	6.2328e-08	-1.83661	98	265	0.00227778	Down-regulated
DLG2	Pig	7.26436e-08	-2.12724	253	442	0.00265476	Down-regulated
COBLL1	Pig	7.70356e-08	-1.69914	462	584	0.00281526	Down-regulated
CADM1	Pig	8.24484e-08	-5.08298	4	62	0.00301308	Down-regulated
DOCK6	Pig	9.33642e-08	-2.58531	86	239	0.00341199	Down-regulated
DUSP16	Pig	9.63772e-08	-1.67382	314	487	0.0035221	Down-regulated
SNTB1	Pig	1.36897e-07	-1.52188	298	487	0.00500289	Down-regulated
HPGD	Pig	1.59526e-07	-2.91375	28	133	0.00582989	Down-regulated
PLEKHM2	Pig	1.79309e-07	-2.20672	75	221	0.00655286	Down-regulated
ENSSSCG00000005095	Pig	1.99147e-07	-4.68212	3	53	0.00727782	Down-regulated
ENSSSCG00000011729	Pig	2.5018e-07	-2.24879	114	274	0.00914284	Down-regulated
COL1A1	Pig	2.51116e-07	-2.34051	151	319	0.00917704	Down-regulated
SLC6A4	Pig	3.38397e-07	-5.76	1	44	0.0123667	Down-regulated
F13A1	Pig	3.43476e-07	-6.6157	1	44	0.0125523	Down-regulated
LAMA4	Pig	3.58674e-07	-1.25628	397	549	0.0131077	Down-regulated
ENSSSCG00000032599	Pig	3.66934e-07	-2.86374	74	212	0.0134096	Down-regulated
HIGD1B	Pig	4.14147e-07	-2.10333	214	381	0.015135	Down-regulated
ARHGAP44	Pig	4.99671e-07	-2.82216	35	142	0.0182605	Down-regulated
KCP	Pig	5.72542e-07	-4.71634	5	62	0.0209236	Down-regulated
P2RY14	Pig	6.51784e-07	-3.27252	0.04	0.15	0.0238195	Down-regulated
PAG1	Pig	7.43758e-07	-1.23194	307	487	0.0271806	Down-regulated
TRPC1	Pig	7.68236e-07	-1.83225	268	434	0.0280752	Down-regulated
EML5	Pig	8.81047e-07	-2.3728	71	204	0.0321979	Down-regulated
GALNT17	Pig	9.68688e-07	-2.77566	32	133	0.0354007	Down-regulated
PKD1	Pig	1.15345e-06	-1.78311	155	319	0.0421527	Down-regulated
SRSF5	Pig	1.20591e-06	-1.5878	208	372	0.0440701	Down-regulated

## Sheet: SMC
gene	Species	p_val	avg_log2FC	pct. 1	pct.2	p_val_adj	level
CD55	Human	3.53755e-12	-5.75775	34	0.9	1.2928e-07	Down-regulated
PTPRT	Pig	4.96083e-10	-8.05941	17	0.7	1.81293e-05	Down-regulated
LPL	Pig	3.21728e-08	-8.14265	0	0.5	0.00117576	Down-regulated
NID1	Pig	3.81004e-08	-4.91353	17	0.6	0.00139238	Down-regulated
TTN	Pig	7.1525e-08	-3.73226	86	0.8	0.00261388	Down-regulated
MTUS2	Pig	6.95897e-07	-5.71151	17	0.5	0.0254316	Down-regulated
ZNF274	Pig	9.38202e-07	-7.31868	0	0.4	0.0342866	Down-regulated
RAPGEF4	Pig	9.38202e-07	-7.411	0	0.4	0.0342866	Down-regulated
BMP6	Pig	9.38202e-07	-8.02597	0	0.4	0.0342866	Down-regulated
ADAMTS16	Pig	9.38202e-07	-8.6122	0	0.4	0.0342866	Down-regulated
