# Supplementary material for: Integrated Molecular Profiling of Preclinical and Clinical Cardiac Xenotransplants
Source: Research Square preprint supplement (doi:10.21203/rs.3.rs-8406985/v1), 2026-02-04
Supplement: Supplementary file 13 [file 5822c6a312ccc9b4c55d2075.xlsx]

## Sheet: CM
Gene	logFC	logCPM	F	PValue	FDR	Observations_Extended	Observations_Standard	level
Sus_scrofa___ISG20	6.52077	1.01422	93.9525	7.22745e-12	2.42004e-07	3	7	Up-regulated
Sus_scrofa___ENSSSCG00000031163	5.63293	0.0241341	84.204	2.20614e-11	3.69352e-07	3	7	Up-regulated
Sus_scrofa___SHFL	5.98374	-0.331959	72.483	1.32518e-10	1.47908e-06	3	7	Up-regulated
Sus_scrofa___ENSSSCG00000014672	4.75139	1.12935	76.3428	3.2659e-10	2.73388e-06	3	7	Up-regulated
Sus_scrofa___MX2	8.22493	5.80699	77.893	6.39727e-10	4.28412e-06	3	7	Up-regulated
Sus_scrofa___ZBP1	5.70284	-0.00515704	62.2622	8.42085e-10	4.6994e-06	3	7	Up-regulated
Sus_scrofa___ENSSSCG00000016868	4.26258	-0.522463	66.9648	1.83848e-09	8.48614e-06	3	7	Up-regulated
Sus_scrofa___TRIM22	5.51417	0.439082	63.8304	2.02751e-09	8.48614e-06	3	7	Up-regulated
Sus_scrofa___ENSSSCG00000016263	5.19165	3.00116	75.6907	2.86007e-09	1.06407e-05	3	7	Up-regulated
Sus_scrofa___FOXS1	6.78018	4.64208	66.1614	3.3254e-09	1.11348e-05	3	7	Up-regulated
Sus_scrofa___ENSSSCG00000045077	5.9642	-1.22311	57.7225	3.82468e-09	1.16423e-05	3	7	Up-regulated
Sus_scrofa___HES4	5.30464	0.618169	65.0993	4.77588e-09	1.33263e-05	3	7	Up-regulated
Sus_scrofa___ENO1	1.97122	7.13244	66.1794	1.3162e-08	3.39012e-05	3	7	Up-regulated
Sus_scrofa___HLA-DOB	4.68819	0.369201	50.8738	1.80961e-08	4.04739e-05	3	7	Up-regulated
Sus_scrofa___ANKRD37	3.58822	2.62605	63.9977	1.84012e-08	4.04739e-05	3	7	Up-regulated
Sus_scrofa___ETV7	4.89663	1.22925	57.4367	1.934e-08	4.04739e-05	3	7	Up-regulated
Sus_scrofa___HERC5	5.31704	5.91774	58.6755	4.05347e-08	7.9839e-05	3	7	Up-regulated
Sus_scrofa___CTSH	2.94988	3.9758	57.3356	4.97176e-08	9.24857e-05	3	7	Up-regulated
Sus_scrofa___UBD	5.58724	0.248838	44.9577	5.53379e-08	9.75229e-05	3	7	Up-regulated
Sus_scrofa___TRIM38	3.71975	-1.47049	41.192	9.51731e-08	0.000159339	3	7	Up-regulated
Sus_scrofa___UBE2L6	5.26653	2.86659	50.4877	1.1342e-07	0.000174386	3	7	Up-regulated
Sus_scrofa___SAMD9	4.31156	0.0717759	45.3464	1.1778e-07	0.000174386	3	7	Up-regulated
Sus_scrofa___EDN1	5.43186	1.07389	43.2521	1.19785e-07	0.000174386	3	7	Up-regulated
Sus_scrofa___BST2	6.68322	3.436	55.2774	1.54527e-07	0.000212334	3	7	Up-regulated
Sus_scrofa___ADM	4.04934	1.58943	48.9652	1.58534e-07	0.000212334	3	7	Up-regulated
Sus_scrofa___PLEKHA4	3.60067	4.03377	49.6314	1.79064e-07	0.000230607	3	7	Up-regulated
Sus_scrofa___CCDC194	3.6125	0.522416	46.5623	2.33357e-07	0.000289397	3	7	Up-regulated
Sus_scrofa___UPP1	3.38139	2.49103	48.014	2.43542e-07	0.000291241	3	7	Up-regulated
Sus_scrofa___ENSSSCG00000028691	2.85815	2.51218	47.4206	2.68377e-07	0.000309874	3	7	Up-regulated
Sus_scrofa___SNAPC1	1.75457	7.37619	46.0094	3.4181e-07	0.000381506	3	7	Up-regulated
Sus_scrofa___ETV5	3.50113	1.63568	46.039	3.55316e-07	0.000383787	3	7	Up-regulated
Sus_scrofa___TYRP1	4.51357	0.0708672	39.166	3.85445e-07	0.00040332	3	7	Up-regulated
Sus_scrofa___OASL	3.63908	1.76466	45.0341	4.27463e-07	0.000416333	3	7	Up-regulated
Sus_scrofa___TUFT1	2.55206	2.01994	44.8171	4.3238e-07	0.000416333	3	7	Up-regulated
Sus_scrofa___ENSSSCG00000032436	6.22132	1.97287	38.3007	4.35182e-07	0.000416333	3	7	Up-regulated
Sus_scrofa___FLT1	2.95425	3.48696	43.0609	5.95875e-07	0.000513718	3	7	Up-regulated
Sus_scrofa___BNIP3	2.34219	6.49583	43.0194	5.99285e-07	0.000513718	3	7	Up-regulated
Sus_scrofa___ENSSSCG00000025593	4.94814	1.44604	39.7217	6.03151e-07	0.000513718	3	7	Up-regulated
Sus_scrofa___MCHR2	8.9787	0.146644	45.5463	6.05192e-07	0.000513718	3	7	Up-regulated
Sus_scrofa___OAS2	4.67022	6.74327	42.8795	6.15982e-07	0.000513718	3	7	Up-regulated
Sus_scrofa___MX1	5.83015	6.02563	42.7555	6.2903e-07	0.000513718	3	7	Up-regulated
Sus_scrofa___RSAD2	7.22976	6.15876	45.9847	6.58548e-07	0.000518558	3	7	Up-regulated
Sus_scrofa___PLOD1	1.77445	4.59753	42.3569	6.8115e-07	0.000518558	3	7	Up-regulated
Sus_scrofa___ZNF395	1.18899	6.65082	42.3537	6.81416e-07	0.000518558	3	7	Up-regulated
Sus_scrofa___HELB	1.79974	4.42697	41.275	8.41637e-07	0.000615724	3	7	Up-regulated
Sus_scrofa___FBXO39	2.19116	6.76841	41.2479	8.45875e-07	0.000615724	3	7	Up-regulated
Sus_scrofa___CXCL11	4.67339	-0.0913997	36.1729	9.21085e-07	0.000656205	3	7	Up-regulated
Sus_scrofa___NDRG1	3.04209	0.168572	38.1982	9.51887e-07	0.000664021	3	7	Up-regulated
Sus_scrofa___IFI35	2.96372	-0.319222	35.3394	1.07151e-06	0.000732213	3	7	Up-regulated
Sus_scrofa___ENSSSCG00000049674	3.43497	1.21894	39.2957	1.23296e-06	0.00081421	3	7	Up-regulated
Sus_scrofa___ENSSSCG00000001398	3.74139	1.18658	36.2216	1.24014e-06	0.00081421	3	7	Up-regulated
Sus_scrofa___TLR3	2.93167	1.05788	39.2126	1.31807e-06	0.000848737	3	7	Up-regulated
Sus_scrofa___IFIT2	4.56615	4.65802	38.401	1.52603e-06	0.000960516	3	7	Up-regulated
Sus_scrofa___TTC9	3.31411	0.344027	37.6608	1.54903e-06	0.000960516	3	7	Up-regulated
Sus_scrofa___RNF19B	2.13665	5.00956	38.1166	1.59304e-06	0.000969842	3	7	Up-regulated
Sus_scrofa___CCL5	4.85523	3.33062	38.0892	1.63394e-06	0.00097698	3	7	Up-regulated
Sus_scrofa___P4HB	1.61796	3.6945	37.3279	1.87844e-06	0.00110347	3	7	Up-regulated
Sus_scrofa___DNAJB9	1.74212	4.01031	37.1997	1.92971e-06	0.00111404	3	7	Up-regulated
Sus_scrofa___SEMA4B	1.42026	6.21111	37.1058	1.96716e-06	0.00111642	3	7	Up-regulated
Sus_scrofa___IFFO2	2.33535	1.23186	36.7351	2.18663e-06	0.00120229	3	7	Up-regulated
Sus_scrofa___TRIOBP	1.65722	4.11755	36.5994	2.1903e-06	0.00120229	3	7	Up-regulated
Sus_scrofa___UBA7	4.2568	-0.442988	33.3472	2.23748e-06	0.00120838	3	7	Up-regulated
Sus_scrofa___KLK8	3.03325	-0.413442	34.7678	2.43294e-06	0.00127377	3	7	Up-regulated
Sus_scrofa___LURAP1L	4.36999	2.08273	36.0729	2.43859e-06	0.00127377	3	7	Up-regulated
Sus_scrofa___ENSSSCG00000033720	2.39779	1.96547	36.0973	2.47268e-06	0.00127377	3	7	Up-regulated
Sus_scrofa___PNOC	2.31404	1.99731	35.8315	2.60635e-06	0.00132133	3	7	Up-regulated
Sus_scrofa___RAB3B	3.50714	2.37027	35.7712	2.64393e-06	0.00132133	3	7	Up-regulated
Sus_scrofa___FAM171B	2.17203	3.43002	35.6451	2.69416e-06	0.00132664	3	7	Up-regulated
Sus_scrofa___IFIT1	4.54178	5.95669	35.3727	2.88292e-06	0.00139901	3	7	Up-regulated
Sus_scrofa___CSDC2	2.88234	1.87454	35.2231	2.98145e-06	0.0014179	3	7	Up-regulated
Sus_scrofa___SIGLEC1	3.68901	0.464461	34.9167	3.00655e-06	0.0014179	3	7	Up-regulated
Sus_scrofa___C20orf96	2.34349	1.62626	34.7862	3.313e-06	0.00154073	3	7	Up-regulated
Sus_scrofa___ENSSSCG00000036618	3.15647	-1.06531	30.5073	3.57568e-06	0.00164011	3	7	Up-regulated
Sus_scrofa___ENSSSCG00000051689	2.6508	0.327058	34.0876	3.65563e-06	0.00165412	3	7	Up-regulated
Sus_scrofa___LAD1	2.62662	-0.423848	33.3414	3.82185e-06	0.0016952	3	7	Up-regulated
Sus_scrofa___HMOX1	2.44876	0.216176	31.6383	3.86604e-06	0.0016952	3	7	Up-regulated
Sus_scrofa___PARP14	4.58066	3.97397	33.8374	3.8983e-06	0.0016952	3	7	Up-regulated
Sus_scrofa___EIF4EBP1	1.7283	3.72124	33.6322	4.18123e-06	0.00179493	3	7	Up-regulated
Sus_scrofa___HIF1A	1.61782	7.19258	33.4705	4.33252e-06	0.00180899	3	7	Up-regulated
Sus_scrofa___PSMB8	5.22082	1.32273	33.53	4.36007e-06	0.00180899	3	7	Up-regulated
Sus_scrofa___MECOM	2.99812	2.62473	33.417	4.40582e-06	0.00180899	3	7	Up-regulated
Sus_scrofa___UCHL1	4.84095	-0.970646	29.365	4.81026e-06	0.00194056	3	7	Up-regulated
Sus_scrofa___ANO6	3.48003	5.9252	32.7307	5.12664e-06	0.00204358	3	7	Up-regulated
Sus_scrofa___BATF2	3.76128	-0.210197	30.0297	5.30199e-06	0.00208861	3	7	Up-regulated
Sus_scrofa___ERO1A	1.87054	7.53318	32.4127	5.50346e-06	0.00214277	3	7	Up-regulated
Sus_scrofa___NMI	4.12733	1.10553	31.4914	5.57255e-06	0.00214473	3	7	Up-regulated
Sus_scrofa___ODC1	1.96689	3.58275	32.3033	5.64612e-06	0.00214835	3	7	Up-regulated
Sus_scrofa___H1-3	2.95849	3.38928	32.0438	6.01331e-06	0.00226236	3	7	Up-regulated
Sus_scrofa___CD109	1.65385	3.35502	31.7665	6.38883e-06	0.00237693	3	7	Up-regulated
Sus_scrofa___IMPDH1	3.12815	-1.15686	27.3484	6.9186e-06	0.00254574	3	7	Up-regulated
Sus_scrofa___NINJ1	1.35842	3.8968	31.3196	7.0841e-06	0.00255827	3	7	Up-regulated
Sus_scrofa___ERAP2	3.02704	1.29265	31.4618	7.10547e-06	0.00255827	3	7	Up-regulated
Sus_scrofa___CCL4	3.96747	1.28699	30.3932	7.3952e-06	0.00263426	3	7	Up-regulated
Sus_scrofa___GK5	1.56231	4.86244	30.8265	7.94791e-06	0.00280134	3	7	Up-regulated
Sus_scrofa___FAM180A	2.61976	2.65754	30.5925	8.42533e-06	0.00293869	3	7	Up-regulated
Sus_scrofa___CCDC83	2.18045	0.895031	30.323	9.16004e-06	0.0031207	3	7	Up-regulated
Sus_scrofa___EDEM1	1.43449	3.39404	30.1996	9.22149e-06	0.0031207	3	7	Up-regulated
Sus_scrofa___TMEM45A	2.69407	1.71569	30.2672	9.22679e-06	0.0031207	3	7	Up-regulated
Sus_scrofa___ENSSSCG00000040253	2.59162	-0.428811	28.8116	9.44056e-06	0.00316108	3	7	Up-regulated
Sus_scrofa___NMU	2.49191	-0.951102	28.3708	9.81488e-06	0.00325388	3	7	Up-regulated
Sus_scrofa___ENSSSCG00000017754	2.75281	3.61348	29.8906	9.9454e-06	0.00326482	3	7	Up-regulated
Sus_scrofa___SLC37A2	1.9947	1.92696	29.3816	1.12997e-05	0.00367338	3	7	Up-regulated
Sus_scrofa___PSMB9	3.08757	2.02599	29.2009	1.16266e-05	0.00374331	3	7	Up-regulated
Sus_scrofa___ENSSSCG00000013880	3.15111	4.19892	28.8234	1.28527e-05	0.00404822	3	7	Up-regulated
Sus_scrofa___ENSSSCG00000049813	1.93962	1.73957	28.8599	1.28618e-05	0.00404822	3	7	Up-regulated
Sus_scrofa___TNMD	1.90327	-0.853696	27.9626	1.29363e-05	0.00404822	3	7	Up-regulated
Sus_scrofa___MROH5	2.70649	4.06112	28.6692	1.33378e-05	0.00413523	3	7	Up-regulated
Sus_scrofa___MCF2L2	1.49107	4.3874	28.5512	1.37245e-05	0.00421607	3	7	Up-regulated
Sus_scrofa___GRM2	2.06054	1.1579	28.5196	1.41084e-05	0.00429459	3	7	Up-regulated
Sus_scrofa___DUSP4	3.44449	1.92372	28.0793	1.49715e-05	0.00451627	3	7	Up-regulated
Sus_scrofa___ECM1	3.33035	-1.40986	24.8021	1.65224e-05	0.00491469	3	7	Up-regulated
Sus_scrofa___CRACDL	2.23751	4.32508	27.7857	1.65858e-05	0.00491469	3	7	Up-regulated
Sus_scrofa___ZNFX1	2.24545	5.66078	27.5404	1.76285e-05	0.00513875	3	7	Up-regulated
Sus_scrofa___ACOXL	2.28999	2.85561	27.5448	1.76489e-05	0.00513875	3	7	Up-regulated
Sus_scrofa___B3GNT5	1.39479	2.14587	27.3586	1.85098e-05	0.00534294	3	7	Up-regulated
Sus_scrofa___TRIB3	3.3517	2.12243	27.3173	1.89493e-05	0.00542307	3	7	Up-regulated
Sus_scrofa___ENSSSCG00000022246	3.17733	-0.461425	24.6095	1.92949e-05	0.00547516	3	7	Up-regulated
Sus_scrofa___FAM83B	3.25447	0.311775	27.0864	1.95261e-05	0.00549421	3	7	Up-regulated
Sus_scrofa___NETO1	2.40202	1.15279	27.1536	1.97311e-05	0.00550564	3	7	Up-regulated
Sus_scrofa___ENSSSCG00000045769	3.36021	3.2834	26.993	2.03606e-05	0.00563432	3	7	Up-regulated
Sus_scrofa___SLC22A18	2.20175	1.75786	26.8685	2.10933e-05	0.00578291	3	7	Up-regulated
Sus_scrofa___UFM1	1.06231	5.30368	26.7994	2.12473e-05	0.00578291	3	7	Up-regulated
Sus_scrofa___GHSR	3.4837	2.7454	26.837	2.14156e-05	0.00578291	3	7	Up-regulated
Sus_scrofa___PFKFB3	2.89329	4.89117	26.6125	2.24007e-05	0.00600053	3	7	Up-regulated
Sus_scrofa___TECTB	2.4147	-0.0513972	26.2311	2.31134e-05	0.00611538	3	7	Up-regulated
Sus_scrofa___DHRS13	2.07811	1.43038	26.5057	2.31947e-05	0.00611538	3	7	Up-regulated
Sus_scrofa___ENSSSCG00000014997	3.83778	1.58157	26.1992	2.49727e-05	0.00648205	3	7	Up-regulated
Sus_scrofa___S100A6	3.26169	-0.562949	22.4369	2.59317e-05	0.00667921	3	7	Up-regulated
Sus_scrofa___CMPK2	4.82258	4.20234	26.0104	2.69236e-05	0.00683093	3	7	Up-regulated
Sus_scrofa___LAT2	1.49923	2.50263	25.8516	2.71622e-05	0.00683093	3	7	Up-regulated
Sus_scrofa___LDLR	2.97937	0.970891	25.9288	2.72311e-05	0.00683093	3	7	Up-regulated
Sus_scrofa___MEIS3	3.1963	-1.6623	22.1411	2.75105e-05	0.00683093	3	7	Up-regulated
Sus_scrofa___AK4	2.97171	3.4213	25.8169	2.75542e-05	0.00683093	3	7	Up-regulated
Sus_scrofa___ACAP1	2.4439	-0.6122	24.6394	2.77448e-05	0.00683093	3	7	Up-regulated
Sus_scrofa___OSMR	2.11604	5.08689	25.6195	2.87771e-05	0.0070139	3	7	Up-regulated
Sus_scrofa___TSPAN5	3.50014	3.68155	25.6147	2.89069e-05	0.0070139	3	7	Up-regulated
Sus_scrofa___PMAIP1	3.21724	-1.10862	22.6974	2.93638e-05	0.00707351	3	7	Up-regulated
Sus_scrofa___TLL2	2.00317	4.04326	25.4947	2.97375e-05	0.00707539	3	7	Up-regulated
Sus_scrofa___LRRC69	1.72578	1.07283	25.5412	2.98236e-05	0.00707539	3	7	Up-regulated
Sus_scrofa___TOP2A	3.36385	0.50745	24.4788	3.00055e-05	0.00707539	3	7	Up-regulated
Sus_scrofa___TMEFF2	1.9053	0.769946	25.5101	3.02334e-05	0.00707927	3	7	Up-regulated
Sus_scrofa___PKM	0.839579	7.10176	25.329	3.10382e-05	0.00721724	3	7	Up-regulated
Sus_scrofa___ENSSSCG00000017146	3.07786	6.77417	25.1441	3.25807e-05	0.00752366	3	7	Up-regulated
Sus_scrofa___C1RL	1.64276	1.33147	25.1136	3.32428e-05	0.00762399	3	7	Up-regulated
Sus_scrofa___IFIT5	2.55098	4.34871	24.8656	3.5075e-05	0.00798947	3	7	Up-regulated
Sus_scrofa___RNPEP	1.68035	2.50908	24.8432	3.53528e-05	0.00799832	3	7	Up-regulated
Sus_scrofa___CAMK1	1.27869	2.80745	24.739	3.62893e-05	0.00815511	3	7	Up-regulated
Sus_scrofa___ZMYND8	0.804672	7.32121	24.5411	3.82103e-05	0.00841738	3	7	Up-regulated
Sus_scrofa___ISG15	4.76248	5.95213	23.5353	3.82866e-05	0.00841738	3	7	Up-regulated
Sus_scrofa___KLF5	2.29238	1.26932	23.8396	3.86814e-05	0.00841738	3	7	Up-regulated
Sus_scrofa___PFKP	1.54292	4.29648	24.4887	3.8754e-05	0.00841738	3	7	Up-regulated
Sus_scrofa___IRF1	2.54229	1.29169	24.5176	3.90619e-05	0.00841738	3	7	Up-regulated
Sus_scrofa___TMEM51	2.80974	0.729777	24.4013	3.94522e-05	0.00841738	3	7	Up-regulated
Sus_scrofa___DNASE1L1	1.41472	2.6702	24.4248	3.94675e-05	0.00841738	3	7	Up-regulated
Sus_scrofa___KDM3A	1.2447	6.75504	24.3512	4.01946e-05	0.00851821	3	7	Up-regulated
Sus_scrofa___G6PD	1.45454	2.18935	24.3257	4.06018e-05	0.00855037	3	7	Up-regulated
Sus_scrofa___PAFAH1B3	2.06226	1.42784	24.285	4.13583e-05	0.00862954	3	7	Up-regulated
Sus_scrofa___PLSCR1	1.99254	4.38602	24.2332	4.14931e-05	0.00862954	3	7	Up-regulated
Sus_scrofa___SSUH2	2.1103	0.358386	24.0881	4.38537e-05	0.00906419	3	7	Up-regulated
Sus_scrofa___PAQR7	2.56496	-1.91651	20.8041	4.42057e-05	0.00908088	3	7	Up-regulated
Sus_scrofa___BAALC	3.03413	1.81951	24.0119	4.47329e-05	0.00908261	3	7	Up-regulated
Sus_scrofa___ARAP2	2.53438	1.36422	24.017	4.47566e-05	0.00908261	3	7	Up-regulated
Sus_scrofa___ELF4	2.07201	0.916466	23.8178	4.72414e-05	0.00941566	3	7	Up-regulated
Sus_scrofa___GRINA	2.26965	-0.373379	23.2307	4.77261e-05	0.00944542	3	7	Up-regulated
Sus_scrofa___MED12L	1.39543	4.36011	23.6954	4.79549e-05	0.00944542	3	7	Up-regulated
Sus_scrofa___TNNT1	1.72688	5.2308	23.6702	4.82799e-05	0.00945383	3	7	Up-regulated
Sus_scrofa___GSTT4	3.23682	-0.0952222	22.5746	4.90034e-05	0.00953376	3	7	Up-regulated
Sus_scrofa___RET	2.87015	-1.71853	20.5324	4.96346e-05	0.00953376	3	7	Up-regulated
Sus_scrofa___WDR54	2.48207	-0.647874	22.2509	4.97627e-05	0.00953376	3	7	Up-regulated
Sus_scrofa___SERP2	1.26006	3.95242	23.5197	5.03006e-05	0.00953376	3	7	Up-regulated
Sus_scrofa___TACR2	2.15786	4.20608	23.513	5.03965e-05	0.00953376	3	7	Up-regulated
Sus_scrofa___ENSSSCG00000011859	1.73279	2.38006	23.4897	5.08008e-05	0.00955626	3	7	Up-regulated
Sus_scrofa___ENSSSCG00000014996	3.27717	-1.38234	21.1421	5.13434e-05	0.00960438	3	7	Up-regulated
Sus_scrofa___PPP2R2C	1.88205	1.40022	23.4207	5.21518e-05	0.00970139	3	7	Up-regulated
Sus_scrofa___PRICKLE3	1.18583	3.39055	23.3495	5.2698e-05	0.00974883	3	7	Up-regulated
Sus_scrofa___SLC2A6	1.91867	-0.685756	22.7182	5.49296e-05	0.00996015	3	7	Up-regulated
Sus_scrofa___KLF2	2.87455	0.821774	23.2705	5.49356e-05	0.00996015	3	7	Up-regulated
Sus_scrofa___PMM1	1.56883	2.8111	23.1399	5.584e-05	0.0100524	3	7	Up-regulated
Sus_scrofa___PALD1	2.69484	-0.684716	22.2422	5.72986e-05	0.0102598	3	7	Up-regulated
Sus_scrofa___TMEM145	1.96606	1.99287	22.9465	5.90793e-05	0.0105224	3	7	Up-regulated
Sus_scrofa___RNF165	2.04776	3.36859	22.7923	6.14191e-05	0.010824	3	7	Up-regulated
Sus_scrofa___EMB	1.75556	2.42404	22.7363	6.25719e-05	0.0109123	3	7	Up-regulated
Sus_scrofa___ENSSSCG00000034802	4.57364	-1.48621	20.8617	6.32276e-05	0.0109695	3	7	Up-regulated
Sus_scrofa___CPLX4	1.5968	0.799235	22.6843	6.44285e-05	0.0110632	3	7	Up-regulated
Sus_scrofa___TNFRSF1B	2.93467	-1.57205	19.7733	6.47586e-05	0.0110632	3	7	Up-regulated
Sus_scrofa___SSR3	1.17748	5.62816	22.5039	6.64946e-05	0.0112034	3	7	Up-regulated
Sus_scrofa___SP110	3.28748	3.03969	22.5111	6.68779e-05	0.0112034	3	7	Up-regulated
Sus_scrofa___ENSSSCG00000047417	3.65769	-2.06775	20.2381	6.69181e-05	0.0112034	3	7	Up-regulated
Sus_scrofa___ENSSSCG00000006324	1.51022	3.34871	22.4569	6.74129e-05	0.0112056	3	7	Up-regulated
Sus_scrofa___LIPH	2.33793	-0.872925	21.454	6.80191e-05	0.0112056	3	7	Up-regulated
Sus_scrofa___SESN2	2.6984	3.56058	22.4258	6.82954e-05	0.0112056	3	7	Up-regulated
Sus_scrofa___DDIT4	2.9674	4.68549	22.3929	6.86042e-05	0.0112056	3	7	Up-regulated
Sus_scrofa___C3orf14	2.95272	-1.14243	20.5492	7.13136e-05	0.0115537	3	7	Up-regulated
Sus_scrofa___PARP8	3.1999	1.1856	22.2237	7.17708e-05	0.0115537	3	7	Up-regulated
Sus_scrofa___H2BC11	4.91702	-2.24148	20.9747	7.63796e-05	0.0122106	3	7	Up-regulated
Sus_scrofa___ENSSSCG00000049262	2.99555	-1.70657	19.1626	7.66772e-05	0.0122106	3	7	Up-regulated
Sus_scrofa___ENSSSCG00000001394	3.20666	-2.0342	19.2013	7.69455e-05	0.0122106	3	7	Up-regulated
Sus_scrofa___ENSSSCG00000024009	2.55391	-1.43209	20.6668	7.77118e-05	0.0122741	3	7	Up-regulated
Sus_scrofa___GPNMB	1.36682	4.4806	21.8459	7.99573e-05	0.0124971	3	7	Up-regulated
Sus_scrofa___MOV10	2.39188	3.72891	21.8433	8.00536e-05	0.0124971	3	7	Up-regulated
Sus_scrofa___FAM162A	0.811948	6.85887	21.8018	8.09495e-05	0.0125458	3	7	Up-regulated
Sus_scrofa___MTURN	2.56022	1.64735	21.8348	8.13056e-05	0.0125458	3	7	Up-regulated
Sus_scrofa___CPNE8	1.56141	2.88131	21.6592	8.4375e-05	0.0129597	3	7	Up-regulated
Sus_scrofa___MGAT4A	1.34277	6.15839	21.6364	8.48294e-05	0.01297	3	7	Up-regulated
Sus_scrofa___ENSSSCG00000013366	1.90195	5.05011	21.4642	8.91993e-05	0.0135761	3	7	Up-regulated
Sus_scrofa___BRSK2	2.94644	-0.850173	20.4207	8.99585e-05	0.0136107	3	7	Up-regulated
Sus_scrofa___TTF2	1.43954	2.98153	21.4214	9.02395e-05	0.0136107	3	7	Up-regulated
Sus_scrofa___COL1A1	2.95075	1.09171	20.7176	9.92417e-05	0.0147551	3	7	Up-regulated
Sus_scrofa___AANAT	2.24683	-0.368453	20.9002	0.000100855	0.0147551	3	7	Up-regulated
Sus_scrofa___ITGB3	2.73854	0.427837	21.0605	0.000100911	0.0147551	3	7	Up-regulated
Sus_scrofa___ENSSSCG00000002941	2.69634	0.339943	20.9829	0.000102071	0.0148597	3	7	Up-regulated
Sus_scrofa___FUT11	1.18056	2.96227	20.8904	0.000105067	0.0151641	3	7	Up-regulated
Sus_scrofa___MYD88	1.90614	-0.219972	20.7514	0.000108402	0.0154456	3	7	Up-regulated
Sus_scrofa___TSPO	1.90613	2.76414	20.7651	0.000109	0.0154651	3	7	Up-regulated
Sus_scrofa___MAP1B	1.10425	6.73344	20.7392	0.000109687	0.0154969	3	7	Up-regulated
Sus_scrofa___ENSSSCG00000031307	1.51435	2.74947	20.7303	0.000110244	0.0155102	3	7	Up-regulated
Sus_scrofa___ENSSSCG00000004404	1.96776	0.231269	20.727	0.000110988	0.0155495	3	7	Up-regulated
Sus_scrofa___NXPE3	1.60666	2.5654	20.5675	0.00011547	0.0161099	3	7	Up-regulated
Sus_scrofa___PLPP5	1.41408	1.19123	20.5239	0.000117817	0.0163129	3	7	Up-regulated
Sus_scrofa___KCTD8	1.83614	3.01183	20.4839	0.00011823	0.0163129	3	7	Up-regulated
Sus_scrofa___ENSSSCG00000046093	3.61093	-2.30422	18.5734	0.000118831	0.0163129	3	7	Up-regulated
Sus_scrofa___GCA	2.2942	0.838878	20.5378	0.000118873	0.0163129	3	7	Up-regulated
Sus_scrofa___XKR9	2.14963	2.53362	20.4468	0.000119775	0.0163696	3	7	Up-regulated
Sus_scrofa___ENSSSCG00000038183	2.55191	-1.56922	18.6197	0.000120923	0.0164593	3	7	Up-regulated
Sus_scrofa___KCNC3	2.08042	0.519944	20.4409	0.00012166	0.0164926	3	7	Up-regulated
Sus_scrofa___CENPF	3.16474	-0.23603	18.5312	0.000122697	0.0165661	3	7	Up-regulated
Sus_scrofa___SH3BGRL2	2.23357	0.108191	20.3092	0.000123192	0.0165661	3	7	Up-regulated
Sus_scrofa___WTIP	1.28528	4.94806	20.2378	0.000126928	0.0168837	3	7	Up-regulated
Sus_scrofa___CDHR4	5.92796	-2.59827	22.4922	0.000126963	0.0168837	3	7	Up-regulated
Sus_scrofa___SLCO4A1	3.02208	-2.03305	17.7485	0.000127066	0.0168837	3	7	Up-regulated
Sus_scrofa___PLEKHB1	2.04248	-0.999769	19.5024	0.000128703	0.0169431	3	7	Up-regulated
Sus_scrofa___GRM3	2.43092	2.51634	20.1954	0.000128854	0.0169431	3	7	Up-regulated
Sus_scrofa___ENSSSCG00000034049	2.50271	-0.0147203	19.9549	0.000129833	0.0169431	3	7	Up-regulated
Sus_scrofa___SLC16A12	2.57198	2.26258	20.0869	0.000133359	0.0171184	3	7	Up-regulated
Sus_scrofa___TSPAN15	1.64378	7.31783	20.0673	0.000133434	0.0171184	3	7	Up-regulated
Sus_scrofa___MMP25	2.75237	2.48662	19.9453	0.000137345	0.0174199	3	7	Up-regulated
Sus_scrofa___HS3ST1	2.37051	-0.0994641	19.8311	0.000140579	0.017696	3	7	Up-regulated
Sus_scrofa___ENSSSCG00000012950	2.62526	-0.967055	19.0159	0.000141238	0.0177124	3	7	Up-regulated
Sus_scrofa___ENSSSCG00000044640	2.28831	-0.566399	19.4903	0.000145294	0.0180856	3	7	Up-regulated
Sus_scrofa___FAM111B	2.67479	-1.01991	18.8882	0.000147134	0.018212	3	7	Up-regulated
Sus_scrofa___PGK1	0.977619	5.35986	19.7195	0.000147865	0.018212	3	7	Up-regulated
Sus_scrofa___CNP	1.50963	-0.173226	19.684	0.000149456	0.0182817	3	7	Up-regulated
Sus_scrofa___ENSSSCG00000033553	2.40004	-1.67142	18.4867	0.000149713	0.0182817	3	7	Up-regulated
Sus_scrofa___ENSSSCG00000013717	1.65073	1.20791	19.6785	0.000150981	0.0182817	3	7	Up-regulated
Sus_scrofa___SEMA3D	2.23112	0.174522	19.6705	0.000151825	0.0182817	3	7	Up-regulated
Sus_scrofa___GDAP1	1.92648	0.858979	19.6853	0.000151886	0.0182817	3	7	Up-regulated
Sus_scrofa___RIMKLA	1.64394	0.465709	19.6695	0.000152984	0.0182817	3	7	Up-regulated
Sus_scrofa___MFRP	2.23993	0.633424	19.672	0.000153295	0.0182817	3	7	Up-regulated
Sus_scrofa___ENSSSCG00000036469	2.2611	0.0493732	19.5752	0.000153514	0.0182817	3	7	Up-regulated
Sus_scrofa___PANX1	2.55369	1.03517	19.6329	0.000153967	0.0182817	3	7	Up-regulated
Sus_scrofa___ENSSSCG00000030801	1.7799	4.00739	19.5648	0.000154841	0.0183205	3	7	Up-regulated
Sus_scrofa___PAX6	3.44503	-2.23692	17.2553	0.00015744	0.0184973	3	7	Up-regulated
Sus_scrofa___ENSSSCG00000035669	2.64851	1.30723	18.4915	0.00015966	0.0186273	3	7	Up-regulated
Sus_scrofa___SH3BP4	2.00233	1.03725	19.4899	0.000160691	0.0186826	3	7	Up-regulated
Sus_scrofa___MSN	1.57974	4.44648	19.4152	0.000161899	0.0187193	3	7	Up-regulated
Sus_scrofa___CADPS2	2.5141	3.65125	19.4119	0.000162125	0.0187193	3	7	Up-regulated
Sus_scrofa___TRANK1	2.23209	5.50725	19.3601	0.000164573	0.0189367	3	7	Up-regulated
Sus_scrofa___ANXA11	0.975586	6.22054	19.3125	0.00016692	0.0190625	3	7	Up-regulated
Sus_scrofa___ENSSSCG00000044997	2.36807	0.663724	19.3142	0.000167759	0.0190625	3	7	Up-regulated
Sus_scrofa___S100A11	3.18885	0.462769	18.6628	0.000167943	0.0190625	3	7	Up-regulated
Sus_scrofa___CD86	2.12161	-0.592434	19.0923	0.000167944	0.0190625	3	7	Up-regulated
Sus_scrofa___CHGA	2.62655	-1.3597	17.8031	0.000170692	0.019244	3	7	Up-regulated
Sus_scrofa___ADAMTS8	3.24651	-1.43309	17.0115	0.000172352	0.0192485	3	7	Up-regulated
Sus_scrofa___H2AC6	2.62084	2.97127	19.211	0.000172596	0.0192485	3	7	Up-regulated
Sus_scrofa___ELAPOR2	1.69543	5.93543	19.1926	0.000173031	0.0192485	3	7	Up-regulated
Sus_scrofa___LIF	3.04957	-2.30546	16.8532	0.000175025	0.0194057	3	7	Up-regulated
Sus_scrofa___GDAP2	0.965727	5.85233	19.1133	0.000177203	0.0195824	3	7	Up-regulated
Sus_scrofa___OCEL1	1.71152	0.843933	19.1474	0.000177957	0.019601	3	7	Up-regulated
Sus_scrofa___ADORA2A	2.18823	0.570837	19.1417	0.000179136	0.0196662	3	7	Up-regulated
Sus_scrofa___ENDOV	1.41222	4.45383	19.0326	0.000181578	0.0198044	3	7	Up-regulated
Sus_scrofa___GAS2	1.27625	3.968	18.9743	0.000184816	0.0200921	3	7	Up-regulated
Sus_scrofa___DDX25	2.39458	-0.372638	18.7062	0.000188717	0.0204499	3	7	Up-regulated
Sus_scrofa___ARRDC5	1.73333	-0.718586	18.412	0.000190369	0.0205408	3	7	Up-regulated
Sus_scrofa___CHD3	1.45306	3.69396	18.8649	0.000191039	0.0205408	3	7	Up-regulated
Sus_scrofa___CBR3	2.7838	0.670479	17.7902	0.000191397	0.0205408	3	7	Up-regulated
Sus_scrofa___COL16A1	2.45375	2.01906	18.8448	0.000193205	0.0206686	3	7	Up-regulated
Sus_scrofa___phTBM	2.48596	2.82111	19.4985	0.000201283	0.0213961	3	7	Up-regulated
Sus_scrofa___UNC93B1	1.93211	0.852952	18.6857	0.000203997	0.0215478	3	7	Up-regulated
Sus_scrofa___ZNF484	1.52606	2.40195	18.5629	0.000209646	0.0220056	3	7	Up-regulated
Sus_scrofa___GBX1	1.78709	1.70378	18.5505	0.000211303	0.0220521	3	7	Up-regulated
Papio_anubis_U5-10	2.6455	-0.834218	17.4876	0.0002117	0.0220521	3	7	Up-regulated
Sus_scrofa___TBXAS1	1.90819	2.90021	18.5071	0.000213236	0.0221052	3	7	Up-regulated
Sus_scrofa___ENSSSCG00000011559	0.840879	4.75321	18.4605	0.000215999	0.0222539	3	7	Up-regulated
Sus_scrofa___RAB27B	2.92244	2.86204	18.4488	0.000217167	0.0223056	3	7	Up-regulated
Sus_scrofa___KRBA1	1.35207	2.20862	18.4052	0.000220046	0.0224634	3	7	Up-regulated
Sus_scrofa___SETX	1.32086	6.19816	18.2914	0.000227472	0.0229492	3	7	Up-regulated
Sus_scrofa___ENSSSCG00000001931	3.15085	2.2764	18.3056	0.000227545	0.0229492	3	7	Up-regulated
Sus_scrofa___ENSSSCG00000035371	2.76949	0.549533	18.0779	0.000234681	0.0235271	3	7	Up-regulated
Sus_scrofa___GSTM3	3.73864	-2.60265	17.0123	0.000237844	0.023773	3	7	Up-regulated
Sus_scrofa___ERICH6	2.65043	2.62578	18.1255	0.000239868	0.0239039	3	7	Up-regulated
Sus_scrofa___SLC16A3	1.95725	2.72754	18.1111	0.000242628	0.024036	3	7	Up-regulated
Sus_scrofa___TREX1	2.27385	0.673226	18.092	0.000245488	0.0241333	3	7	Up-regulated
Sus_scrofa___SPAG1	1.12994	3.19108	18.0429	0.000245654	0.0241333	3	7	Up-regulated
Sus_scrofa___RNF181	1.45619	1.57697	18.0549	0.000245773	0.0241333	3	7	Up-regulated
Sus_scrofa___CBARP	1.86019	1.31779	18.0444	0.000247279	0.0241633	3	7	Up-regulated
Sus_scrofa___AKR1D1	1.53475	4.90467	18.0173	0.000247522	0.0241633	3	7	Up-regulated
Sus_scrofa___RAB39B	1.54338	-0.931568	17.559	0.000248901	0.0242273	3	7	Up-regulated
Sus_scrofa___GPR171	2.38665	-0.0511107	17.6835	0.000250316	0.0242944	3	7	Up-regulated
Sus_scrofa___ETS1	1.7506	4.02077	17.9429	0.000253358	0.0245186	3	7	Up-regulated
Sus_scrofa___TRIM72	1.82939	1.43488	17.9526	0.000254661	0.0245737	3	7	Up-regulated
Sus_scrofa___STIM1	1.85488	0.858506	17.9391	0.000256954	0.0246551	3	7	Up-regulated
Sus_scrofa___MPI	1.02146	2.65318	17.8986	0.000256978	0.0246551	3	7	Up-regulated
Sus_scrofa___GTPBP2	1.24573	5.08157	17.8472	0.000260908	0.0249607	3	7	Up-regulated
Sus_scrofa___NRIP2	2.45108	-2.25209	16.0268	0.000262554	0.0250466	3	7	Up-regulated
Sus_scrofa___LGALS3BP	3.66536	2.25533	16.963	0.000263891	0.0250959	3	7	Up-regulated
Sus_scrofa___P2RY12	1.73286	1.8491	17.8166	0.00026493	0.0250959	3	7	Up-regulated
Sus_scrofa___ENSSSCG00000032422	1.60854	2.71213	17.7959	0.000265319	0.0250959	3	7	Up-regulated
Sus_scrofa___LIPA	1.96854	6.09528	17.7772	0.000266633	0.0250976	3	7	Up-regulated
Sus_scrofa___ENSSSCG00000027232	1.63098	-0.32013	17.7671	0.000267218	0.0250976	3	7	Up-regulated
Sus_scrofa___CMAS	1.24043	4.25686	17.7661	0.000267585	0.0250976	3	7	Up-regulated
Sus_scrofa___ACER2	1.9089	2.20374	17.7629	0.000268469	0.0251101	3	7	Up-regulated
Sus_scrofa___WSB1	1.22585	7.26451	17.7241	0.000271075	0.0252385	3	7	Up-regulated
Sus_scrofa___OPALIN	1.97635	-0.190811	17.667	0.000273251	0.0252385	3	7	Up-regulated
Sus_scrofa___HERPUD1	1.14428	5.34902	17.698	0.00027329	0.0252385	3	7	Up-regulated
Sus_scrofa___ENSSSCG00000039706	1.77145	-0.99719	17.0898	0.000274897	0.0252385	3	7	Up-regulated
Sus_scrofa___STOX2	2.10455	1.87329	17.6911	0.000275107	0.0252385	3	7	Up-regulated
Sus_scrofa___CAVIN2	1.93558	5.35363	17.6723	0.000275497	0.0252385	3	7	Up-regulated
Sus_scrofa___KDM5B	0.737069	7.23819	17.6614	0.000276424	0.0252385	3	7	Up-regulated
Sus_scrofa___PFKL	1.57796	4.43036	17.5896	0.000282714	0.0256542	3	7	Up-regulated
Sus_scrofa___CDC42BPG	1.83643	-1.83795	16.1614	0.000283898	0.025692	3	7	Up-regulated
Sus_scrofa___BID	0.893615	3.96985	17.5551	0.000285793	0.0257376	3	7	Up-regulated
Sus_scrofa___HFE	2.50068	-1.7835	15.8317	0.00028594	0.0257376	3	7	Up-regulated
Sus_scrofa___TMEM245	0.781408	8.51351	17.4955	0.000291132	0.0261348	3	7	Up-regulated
Sus_scrofa___ENSSSCG00000028892	1.55479	2.68065	17.4744	0.000293385	0.0261982	3	7	Up-regulated
Sus_scrofa___ENSSSCG00000007944	1.90815	0.570937	17.5313	0.000293404	0.0261982	3	7	Up-regulated
Sus_scrofa___NPDC1	2.50369	-1.49066	16.154	0.000302888	0.0269016	3	7	Up-regulated
Sus_scrofa___ARHGEF39	1.92038	2.74536	17.3454	0.000305733	0.0270642	3	7	Up-regulated
Sus_scrofa___SLC39A12	2.01113	1.04223	17.3599	0.000306336	0.0270642	3	7	Up-regulated
Sus_scrofa___APOBEC3B	1.9633	2.5616	17.303	0.00030986	0.0273035	3	7	Up-regulated
Sus_scrofa___KHNYN	1.47817	2.49583	17.2569	0.000314227	0.0275434	3	7	Up-regulated
Sus_scrofa___MYO7B	1.75885	2.5077	17.2374	0.00031608	0.0276077	3	7	Up-regulated
Sus_scrofa___STX11	1.45569	3.04172	17.2207	0.000317696	0.0276305	3	7	Up-regulated
Sus_scrofa___P2RY14	2.09184	1.04722	17.1853	0.000319454	0.0276398	3	7	Up-regulated
Sus_scrofa___TSEN34	1.52139	1.96011	17.1767	0.000322739	0.027852	3	7	Up-regulated
Sus_scrofa___B2M	1.75876	6.41225	17.1144	0.000328227	0.028223	3	7	Up-regulated
Sus_scrofa___CGAS	2.96345	-2.09477	15.0977	0.000329274	0.028223	3	7	Up-regulated
Sus_scrofa___IL15	3.13527	2.73336	17.1092	0.000330366	0.028223	3	7	Up-regulated
Sus_scrofa___ENSSSCG00000038135	1.86117	-1.24331	16.4712	0.000330409	0.028223	3	7	Up-regulated
Sus_scrofa___ISG12(A)	4.76479	5.82155	16.8779	0.00033571	0.0285618	3	7	Up-regulated
Sus_scrofa___NSD2	1.00166	5.11108	17.0049	0.00033982	0.0288064	3	7	Up-regulated
Sus_scrofa___XKRX	1.57643	2.99983	16.9927	0.000341352	0.0288632	3	7	Up-regulated
Sus_scrofa___PRRT3	2.02966	-0.940553	16.4108	0.000348306	0.0293032	3	7	Up-regulated
Sus_scrofa___PRKCZ	1.4145	2.19477	16.899	0.000352021	0.0295229	3	7	Up-regulated
Sus_scrofa___DNAH9	1.05048	2.77861	16.8821	0.000353536	0.0295229	3	7	Up-regulated
Sus_scrofa___HMCN1	2.39744	6.2784	16.8807	0.000353562	0.0295229	3	7	Up-regulated
Sus_scrofa___RASSF1	1.5675	4.01245	16.8386	0.000358316	0.0298092	3	7	Up-regulated
Sus_scrofa___ENSSSCG00000003421	1.3499	3.3929	16.8279	0.000359584	0.0298092	3	7	Up-regulated
Sus_scrofa___TMEM140	1.70282	3.03776	16.7973	0.000363212	0.0300291	3	7	Up-regulated
Sus_scrofa___ENSSSCG00000009208	0.859558	6.50486	16.7821	0.000364758	0.030077	3	7	Up-regulated
Sus_scrofa___ARFGAP3	0.958511	6.87724	16.7488	0.000368657	0.0300911	3	7	Up-regulated
Sus_scrofa___KCNAB1	1.51982	4.73862	16.7436	0.000369291	0.0300911	3	7	Up-regulated
Sus_scrofa___DDX60	3.79575	5.98352	16.741	0.000370065	0.0300911	3	7	Up-regulated
Sus_scrofa___IRF3	0.90512	4.07143	16.7356	0.000370253	0.0300911	3	7	Up-regulated
Sus_scrofa___DIO1	1.69692	0.277557	16.7128	0.000373635	0.0302162	3	7	Up-regulated
Sus_scrofa___HAP1	1.64553	-0.314279	16.5468	0.000385507	0.0309552	3	7	Up-regulated
Sus_scrofa___LIMK1	1.08827	3.62269	16.5658	0.000391009	0.0312472	3	7	Up-regulated
Sus_scrofa___MFSD12	1.11705	2.05927	16.4972	0.000400671	0.0318671	3	7	Up-regulated
Sus_scrofa___RNF32	1.59439	0.409533	16.5235	0.000402107	0.0319056	3	7	Up-regulated
Sus_scrofa___PODXL2	1.49782	1.52625	16.4845	0.000403094	0.0319082	3	7	Up-regulated
Sus_scrofa___ABCC11	1.20472	0.730783	16.4461	0.000409034	0.0323021	3	7	Up-regulated
Sus_scrofa___GABRP	2.88945	-2.16754	14.7877	0.000410811	0.0323158	3	7	Up-regulated
Sus_scrofa___ENSSSCG00000001396	1.96056	-0.613294	15.7012	0.000412089	0.0323158	3	7	Up-regulated
Sus_scrofa___HSPA5	1.79208	4.66913	16.4017	0.000412102	0.0323158	3	7	Up-regulated
Sus_scrofa___PARP9	3.10509	3.69579	16.3876	0.000415384	0.0323432	3	7	Up-regulated
Sus_scrofa___SLC22A17	2.67026	-1.48384	15.0778	0.000415397	0.0323432	3	7	Up-regulated
Sus_scrofa___LDHC	1.38256	2.68308	16.3615	0.000417745	0.0323791	3	7	Up-regulated
Sus_scrofa___SRGN	2.30508	-0.406775	15.9772	0.00042043	0.032512	3	7	Up-regulated
Sus_scrofa___OLFML2B	2.26547	-1.79896	15.0475	0.000425813	0.0328524	3	7	Up-regulated
Sus_scrofa___TDRD1	1.69765	0.0599901	16.2339	0.000428206	0.0329611	3	7	Up-regulated
Sus_scrofa___NARF	1.01364	5.29902	16.2674	0.000430327	0.0330483	3	7	Up-regulated
Sus_scrofa___MBOAT7	1.77332	1.47627	16.2295	0.000438092	0.033289	3	7	Up-regulated
Sus_scrofa___UNC5A	1.52512	-0.560449	15.9445	0.000438432	0.033289	3	7	Up-regulated
Sus_scrofa___ENSSSCG00000039731	1.52337	3.1589	16.1872	0.000441841	0.033472	3	7	Up-regulated
Sus_scrofa___TICAM1	2.44915	-1.97731	14.6516	0.000445196	0.0335742	3	7	Up-regulated
Sus_scrofa___KIF3C	1.185	4.134	16.1211	0.000451263	0.0338791	3	7	Up-regulated
Sus_scrofa___ENSSSCG00000035799	2.03427	0.244574	15.9229	0.000454423	0.03404	3	7	Up-regulated
Sus_scrofa___ENSSSCG00000023228	1.06894	3.47765	16.0902	0.000455876	0.0340726	3	7	Up-regulated
Sus_scrofa___SH3D19	1.64454	4.51215	15.999	0.000469587	0.0347588	3	7	Up-regulated
Sus_scrofa___LGALS3	2.17508	-0.928366	15.6522	0.000474656	0.0349991	3	7	Up-regulated
Sus_scrofa___ENSSSCG00000007719	1.92507	0.583018	15.9912	0.000475588	0.0349991	3	7	Up-regulated
Sus_scrofa___CNN3	2.26094	1.69682	15.242	0.000479731	0.0350728	3	7	Up-regulated
Sus_scrofa___ENSSSCG00000025631	1.16542	2.87839	15.9211	0.000481887	0.0351536	3	7	Up-regulated
Sus_scrofa___NEDD4	2.04632	2.40832	15.8702	0.000490677	0.0355067	3	7	Up-regulated
Sus_scrofa___OSBPL10	1.63589	3.67989	15.8624	0.000491	0.0355067	3	7	Up-regulated
Sus_scrofa___ENSSSCG00000022128	0.737586	6.78219	15.8552	0.000492029	0.0355067	3	7	Up-regulated
Sus_scrofa___NAGS	2.5242	-2.11024	14.2737	0.000498272	0.0357309	3	7	Up-regulated
Sus_scrofa___POLR1G	1.45049	2.32104	15.8175	0.000498864	0.0357309	3	7	Up-regulated
Sus_scrofa___BICDL2	2.19529	1.85148	15.8344	0.000499404	0.0357309	3	7	Up-regulated
Sus_scrofa___MDH1B	1.864	0.302071	15.8078	0.000500542	0.0357359	3	7	Up-regulated
Sus_scrofa___ENSSSCG00000009211	1.55087	3.47027	15.7759	0.000505148	0.035988	3	7	Up-regulated
Sus_scrofa___ETNK2	1.71322	-0.272815	15.6301	0.000510566	0.0362968	3	7	Up-regulated
Sus_scrofa___FRMD4A	1.77831	5.30674	15.6978	0.000518078	0.0367528	3	7	Up-regulated
Sus_scrofa___CHRNB1	1.37673	1.90682	15.6843	0.000521715	0.0369325	3	7	Up-regulated
Sus_scrofa___ENSSSCG00000041010	2.60021	-1.41139	14.489	0.000527589	0.0371911	3	7	Up-regulated
Sus_scrofa___C1orf115	1.74956	1.69114	15.5459	0.000530204	0.037297	3	7	Up-regulated
Sus_scrofa___ENSSSCG00000001229	3.17762	4.97994	15.5635	0.000533458	0.0373146	3	7	Up-regulated
Sus_scrofa___ENSSSCG00000004578	1.90005	4.44942	15.6059	0.00053403	0.0373146	3	7	Up-regulated
Sus_scrofa___CCDC180	1.49607	5.73653	15.6003	0.000534956	0.0373146	3	7	Up-regulated
Sus_scrofa___NEK2	2.42034	-0.874328	14.6803	0.000547234	0.037937	3	7	Up-regulated
Sus_scrofa___EFCAB3	1.24811	1.51171	15.4805	0.000558619	0.0386463	3	7	Up-regulated
Sus_scrofa___ENSSSCG00000008898	2.20254	0.687509	14.7683	0.00056214	0.0388097	3	7	Up-regulated
Sus_scrofa___BLVRB	1.35313	2.73934	15.3904	0.000573755	0.0393447	3	7	Up-regulated
Sus_scrofa___GPR173	2.01679	-1.42708	14.6035	0.00057459	0.0393447	3	7	Up-regulated
Sus_scrofa___CSTB	1.83897	1.70116	15.3778	0.000578361	0.0395221	3	7	Up-regulated
Sus_scrofa___LGALS1	2.89985	1.27056	15.0874	0.000584375	0.0398517	3	7	Up-regulated
Sus_scrofa___GJC1	1.70491	3.70045	15.2844	0.000593946	0.0403759	3	7	Up-regulated
Sus_scrofa___MAP1A	2.23121	1.10507	15.2711	0.000594472	0.0403759	3	7	Up-regulated
Sus_scrofa___APAF1	1.08465	4.70266	15.2739	0.000595922	0.0403924	3	7	Up-regulated
Sus_scrofa___H2AC12	3.7938	-2.21476	14.2774	0.000598055	0.0404551	3	7	Up-regulated
Sus_scrofa___EIF5A2	1.72312	0.3875	15.2797	0.000604203	0.0407065	3	7	Up-regulated
Sus_scrofa___CD207	2.96134	-2.70881	14.459	0.000608514	0.0407976	3	7	Up-regulated
Sus_scrofa___TMEM108	1.2532	3.92205	15.2072	0.000609336	0.0407976	3	7	Up-regulated
Sus_scrofa___GPRC5B	1.78566	-0.874904	14.9233	0.000611648	0.0407976	3	7	Up-regulated
Sus_scrofa___AIRE	4.3843	-2.37935	14.5477	0.000621591	0.0412963	3	7	Up-regulated
Sus_scrofa___RABIF	1.47145	2.30494	15.1205	0.000627896	0.0416326	3	7	Up-regulated
Sus_scrofa___DNAH12	1.62085	3.41268	15.1033	0.000630901	0.041659	3	7	Up-regulated
Sus_scrofa___LRRC55	1.88024	-0.216326	15.0839	0.000631109	0.041659	3	7	Up-regulated
Sus_scrofa___ENSSSCG00000015083	1.85076	2.98238	15.0989	0.000632026	0.041659	3	7	Up-regulated
Sus_scrofa___TGM1	2.44645	-1.10942	14.5147	0.000636257	0.0417714	3	7	Up-regulated
Sus_scrofa___HTATIP2	0.899159	3.73202	15.0693	0.000638041	0.0417714	3	7	Up-regulated
Sus_scrofa___MCM5	2.69574	-1.93281	13.6456	0.000638974	0.0417714	3	7	Up-regulated
Sus_scrofa___EMCN	2.34543	0.730525	14.7858	0.000641387	0.0417714	3	7	Up-regulated
Sus_scrofa___RNF186	1.55348	-0.519607	14.8998	0.000641473	0.0417714	3	7	Up-regulated
Sus_scrofa___ENSSSCG00000042067	1.79424	-1.27391	14.401	0.000642629	0.0417714	3	7	Up-regulated
Sus_scrofa___ENSSSCG00000004572	2.38196	-1.82073	13.8987	0.000643712	0.0417714	3	7	Up-regulated
Sus_scrofa___TAFA5	2.48335	-0.293389	14.8676	0.000650999	0.0421626	3	7	Up-regulated
Sus_scrofa___ENSSSCG00000029160	2.3976	3.74156	14.9812	0.00065717	0.0424801	3	7	Up-regulated
Sus_scrofa___TFAP2A	4.57591	-2.26126	14.7624	0.000668002	0.0429316	3	7	Up-regulated
Sus_scrofa___PREX1	1.80511	1.15451	14.9412	0.000671964	0.0430284	3	7	Up-regulated
Sus_scrofa___PLOD2	2.01963	5.91305	14.8852	0.000678474	0.0431309	3	7	Up-regulated
Sus_scrofa___NUPR1	1.14535	2.73437	14.883	0.000679342	0.0431309	3	7	Up-regulated
Sus_scrofa___CGNL1	2.67439	1.87466	14.9025	0.000679549	0.0431309	3	7	Up-regulated
Sus_scrofa___STC2	1.14722	6.73413	14.8734	0.00068117	0.0431309	3	7	Up-regulated
Sus_scrofa___CHST3	2.46998	-0.997687	14.3293	0.000681895	0.0431309	3	7	Up-regulated
Sus_scrofa___ARNTL2	1.41076	4.40721	14.8624	0.000683799	0.0431309	3	7	Up-regulated
Sus_scrofa___ZFP36L1	2.44786	3.12092	14.8632	0.000683984	0.0431309	3	7	Up-regulated
Sus_scrofa___EBI3	1.82676	-0.709112	14.6535	0.000691117	0.0434988	3	7	Up-regulated
Sus_scrofa___PRX	1.57975	-0.125748	14.7312	0.000693504	0.0435672	3	7	Up-regulated
Sus_scrofa___TRIM62	1.1144	1.38008	14.7867	0.000704256	0.0441598	3	7	Up-regulated
Sus_scrofa___TRAF3IP2	0.867171	6.62598	14.6282	0.000739827	0.0460453	3	7	Up-regulated
Sus_scrofa___ARMC12	1.43086	2.59433	14.6158	0.000744804	0.0461834	3	7	Up-regulated
Sus_scrofa___LONP1	0.891158	3.91437	14.5644	0.000756061	0.0464406	3	7	Up-regulated
Sus_scrofa___ENSSSCG00000021815	1.37643	1.7009	14.5698	0.000757203	0.0464406	3	7	Up-regulated
Sus_scrofa___PLEKHF1	1.5499	3.20918	14.5606	0.000757275	0.0464406	3	7	Up-regulated
Sus_scrofa___HYOU1	1.06298	3.69758	14.5472	0.000760544	0.0465559	3	7	Up-regulated
Sus_scrofa___GPRC5A	1.77445	-0.314231	14.4445	0.00077632	0.0474348	3	7	Up-regulated
Sus_scrofa___CD200	2.36718	-0.893136	13.6062	0.000784419	0.0477602	3	7	Up-regulated
Sus_scrofa___ZNF367	2.44048	-0.0172971	14.3972	0.000786758	0.0477724	3	7	Up-regulated
Sus_scrofa___ERAP1	1.06211	3.24384	14.4386	0.000789238	0.0477724	3	7	Up-regulated
Sus_scrofa___ERBB3	1.2951	3.72921	14.435	0.000790046	0.0477724	3	7	Up-regulated
Sus_scrofa___CENPT	3.44888	-1.89587	13.4878	0.000793696	0.0477724	3	7	Up-regulated
Sus_scrofa___NFKBIE	1.7732	-0.696951	14.1748	0.000794685	0.0477724	3	7	Up-regulated
Sus_scrofa___SEMA5B	1.38755	0.986514	14.3881	0.00080764	0.0483775	3	7	Up-regulated
Sus_scrofa___ENSSSCG00000022674	1.37827	2.06987	14.3472	0.000815058	0.0487346	3	7	Up-regulated
Sus_scrofa___PRDM8	3.07554	-2.34448	12.8622	0.000825191	0.0490776	3	7	Up-regulated
Sus_scrofa___DNAJB13	1.11425	1.50654	14.2863	0.000834221	0.0494391	3	7	Up-regulated
Sus_scrofa___CHN1	-1.43057	8.13552	33.3712	4.43009e-06	0.00180899	3	7	Down-regulated
Sus_scrofa___TRDMT1	-0.943876	5.64467	26.1886	2.4836e-05	0.00648205	3	7	Down-regulated
Sus_scrofa___SIPA1L2	-1.26767	8.78333	24.4623	3.90209e-05	0.00841738	3	7	Down-regulated
Sus_scrofa___KIF26B	-2.06519	10.6743	23.9224	4.50959e-05	0.00909634	3	7	Down-regulated
Sus_scrofa___GFM1	-1.11513	8.29303	23.8112	4.64694e-05	0.00931725	3	7	Down-regulated
Sus_scrofa___ENSSSCG00000004082	-1.07512	8.58046	23.5189	5.03003e-05	0.00953376	3	7	Down-regulated
Sus_scrofa___USP28	-1.35163	8.42102	23.2008	5.48621e-05	0.00996015	3	7	Down-regulated
Sus_scrofa___CNKSR3	-1.15466	7.34875	23.1896	5.50301e-05	0.00996015	3	7	Down-regulated
Sus_scrofa___SLC8A1	-1.13215	13.6206	22.8346	6.06722e-05	0.0107489	3	7	Down-regulated
Sus_scrofa___RYR2	-1.05795	13.8953	22.7571	6.19855e-05	0.0108666	3	7	Down-regulated
Sus_scrofa___METAP1D	-0.885612	6.34013	22.6082	6.45945e-05	0.0110632	3	7	Down-regulated
Sus_scrofa___EPC1	-0.828281	8.69212	22.5241	6.61213e-05	0.0112034	3	7	Down-regulated
Sus_scrofa___SPATS2L	-1.05942	7.90835	22.4191	6.80811e-05	0.0112056	3	7	Down-regulated
Sus_scrofa___MRTFB	-0.929929	8.58445	22.2311	7.17484e-05	0.0115537	3	7	Down-regulated
Sus_scrofa___RNF180	-1.16602	8.70161	21.8329	8.02439e-05	0.0124971	3	7	Down-regulated
Sus_scrofa___PDE3B	-1.14884	9.8358	21.3903	9.09774e-05	0.0136605	3	7	Down-regulated
Sus_scrofa___ALCAM	-1.4911	8.67637	21.3083	9.31319e-05	0.0139215	3	7	Down-regulated
Sus_scrofa___FIGN	-1.23721	6.98337	21.0444	0.000100444	0.0147551	3	7	Down-regulated
Sus_scrofa___KCNJ3	-1.11676	9.82361	21.0315	0.000100819	0.0147551	3	7	Down-regulated
Sus_scrofa___SEMA3C	-1.47527	9.03333	20.966	0.000102737	0.014892	3	7	Down-regulated
Sus_scrofa___EPC2	-0.872965	7.0075	20.8319	0.000106784	0.0153458	3	7	Down-regulated
Sus_scrofa___HIPK3	-1.09645	8.88364	20.7922	0.000108017	0.0154456	3	7	Down-regulated
Sus_scrofa___MYOCD	-1.1852	10.642	20.1756	0.000129259	0.0169431	3	7	Down-regulated
Sus_scrofa___KLHL31	-1.49495	7.38781	20.1549	0.000130044	0.0169431	3	7	Down-regulated
Sus_scrofa___DACH1	-1.94631	10.5555	20.1391	0.000130649	0.016956	3	7	Down-regulated
Sus_scrofa___ZNF236	-0.927928	5.82563	20.1092	0.000131801	0.0170395	3	7	Down-regulated
Sus_scrofa___RGS7BP	-1.22022	6.70415	19.9906	0.000136479	0.0174014	3	7	Down-regulated
Sus_scrofa___PPP1R3A	-1.66454	7.10238	19.9856	0.000136679	0.0174014	3	7	Down-regulated
Sus_scrofa___CDH2	-1.12145	11.7375	19.9533	0.000137988	0.0174354	3	7	Down-regulated
Sus_scrofa___RNF11	-0.986436	6.74373	19.8019	0.000144298	0.0180286	3	7	Down-regulated
Sus_scrofa___HACD1	-1.37382	7.56478	19.7177	0.000147942	0.018212	3	7	Down-regulated
Sus_scrofa___MYOM1	-1.11961	10.2356	19.6069	0.000152889	0.0182817	3	7	Down-regulated
Sus_scrofa___PDE4D	-1.10889	13.426	19.5123	0.000157254	0.0184973	3	7	Down-regulated
Sus_scrofa___SOX6	-0.954032	10.3357	19.484	0.000158584	0.0185666	3	7	Down-regulated
Sus_scrofa___CXADR	-1.0898	6.29194	19.2503	0.000170063	0.0192378	3	7	Down-regulated
Sus_scrofa___PAXBP1	-0.835856	7.61484	19.2133	0.000171956	0.0192485	3	7	Down-regulated
Sus_scrofa___TANC1	-1.18708	10.3868	19.0496	0.000180636	0.0197661	3	7	Down-regulated
Sus_scrofa___PHLDB2	-1.12226	9.82803	18.6945	0.00020112	0.0213961	3	7	Down-regulated
Sus_scrofa___ITGB1BP2	-1.39254	6.81355	18.6515	0.00020377	0.0215478	3	7	Down-regulated
Sus_scrofa___AGL	-0.891574	8.28986	18.61	0.000206362	0.021729	3	7	Down-regulated
Sus_scrofa___ENSSSCG00000043643	-4.93511	-2.36549	17.2866	0.000212065	0.0220521	3	7	Down-regulated
Sus_scrofa___DAPL1	-1.87585	4.57694	18.4826	0.000214924	0.0222115	3	7	Down-regulated
Sus_scrofa___TRRAP	-0.70413	6.96186	18.4244	0.000218388	0.0223624	3	7	Down-regulated
Sus_scrofa___MRPS28	-1.02515	5.8243	18.3776	0.000221542	0.0225475	3	7	Down-regulated
Sus_scrofa___LRRC24	-1.77452	2.80049	18.3545	0.000223346	0.0226621	3	7	Down-regulated
Sus_scrofa___HOMER2	-1.39045	8.83136	18.2548	0.000230045	0.0231316	3	7	Down-regulated
Sus_scrofa___ASXL3	-1.19762	6.86189	18.1089	0.00024061	0.0239068	3	7	Down-regulated
Sus_scrofa___SESN1	-0.917268	8.99211	17.6867	0.000274251	0.0252385	3	7	Down-regulated
Sus_scrofa___PRKAA2	-0.881682	9.10586	17.6591	0.000276625	0.0252385	3	7	Down-regulated
Sus_scrofa___SFPQ	-0.839013	7.6195	17.6192	0.000280089	0.0254851	3	7	Down-regulated
Sus_scrofa___TBX5	-1.13815	7.18982	17.4304	0.000297132	0.0264605	3	7	Down-regulated
Sus_scrofa___ADAMTS6	-1.73241	8.4933	17.2558	0.0003139	0.0275434	3	7	Down-regulated
Sus_scrofa___TRPM7	-0.670122	9.66291	17.2285	0.000316609	0.0276077	3	7	Down-regulated
Sus_scrofa___PIGN	-0.75908	6.4298	17.2006	0.000319412	0.0276398	3	7	Down-regulated
Sus_scrofa___PTPN4	-1.00495	9.35776	17.0397	0.000336082	0.0285618	3	7	Down-regulated
Sus_scrofa___CPNE3	-1.07324	9.37256	16.9716	0.000343412	0.0289643	3	7	Down-regulated
Sus_scrofa___FGF13	-1.21233	9.69141	16.8263	0.000359662	0.0298092	3	7	Down-regulated
Sus_scrofa___BARD1	-1.33835	6.14361	16.7697	0.000366202	0.030077	3	7	Down-regulated
Sus_scrofa___CAMK2D	-0.984667	11.7761	16.7673	0.000366486	0.030077	3	7	Down-regulated
Sus_scrofa___NAALADL2	-1.22714	7.3838	16.7213	0.000371906	0.0301523	3	7	Down-regulated
Sus_scrofa___STRIP2	-1.09253	6.59224	16.6996	0.000374499	0.0302162	3	7	Down-regulated
Papio_anubis_PPP3CB	-3.11719	-0.141561	16.0391	0.000381924	0.0307412	3	7	Down-regulated
Sus_scrofa___GALNT7	-0.894587	7.21975	16.5824	0.000388819	0.0311464	3	7	Down-regulated
Sus_scrofa___PGM5	-1.05161	7.55007	16.5479	0.000393148	0.0313432	3	7	Down-regulated
Sus_scrofa___COQ8A	-1.09652	7.79152	16.394	0.000413088	0.0323174	3	7	Down-regulated
Papio_anubis_ENSPANG00000017966	-2.7634	0.962771	16.4015	0.000416316	0.0323432	3	7	Down-regulated
Sus_scrofa___BMP5	-1.53041	6.29438	16.2565	0.000431837	0.0330884	3	7	Down-regulated
Sus_scrofa___ARHGEF6	-0.809435	8.34812	16.2464	0.000433247	0.0331206	3	7	Down-regulated
Sus_scrofa___TPK1	-0.828125	8.36294	16.2297	0.000435597	0.0332244	3	7	Down-regulated
Sus_scrofa___CWC27	-0.749379	7.64281	16.1756	0.000443291	0.033506	3	7	Down-regulated
Sus_scrofa___RCAN2	-0.890618	11.8104	16.1352	0.000449147	0.033796	3	7	Down-regulated
Sus_scrofa___ENSSSCG00000049158	-1.16415	7.22316	16.0754	0.000457949	0.0341513	3	7	Down-regulated
Sus_scrofa___IKZF2	-1.09112	7.04384	16.05	0.000461747	0.0343581	3	7	Down-regulated
Sus_scrofa___MYOZ2	-1.19614	11.573	16.0374	0.000463637	0.0344222	3	7	Down-regulated
Sus_scrofa___SMPD4	-0.815193	4.63815	15.9941	0.000470246	0.0347588	3	7	Down-regulated
Sus_scrofa___ENSSSCG00000033987	-1.03663	6.5854	15.9502	0.000477003	0.0350262	3	7	Down-regulated
Sus_scrofa___NIPSNAP2	-0.800993	7.36933	15.9334	0.000479627	0.0350728	3	7	Down-regulated
Sus_scrofa___PCDH7	-0.857378	12.2714	15.8881	0.00048677	0.0354039	3	7	Down-regulated
Sus_scrofa___LGR4	-1.25271	7.13988	15.8839	0.000487433	0.0354039	3	7	Down-regulated
Sus_scrofa___RAPGEF2	-0.95339	9.47556	15.8265	0.000496666	0.0357309	3	7	Down-regulated
Sus_scrofa___PPM1E	-1.08775	11.061	15.6669	0.000523339	0.0369694	3	7	Down-regulated
Sus_scrofa___EPHA7	-1.4118	6.86114	15.5945	0.000535956	0.0373146	3	7	Down-regulated
Sus_scrofa___GABRB1	-1.23414	8.51009	15.5941	0.000536027	0.0373146	3	7	Down-regulated
Sus_scrofa___ENSSSCG00000005916	-1.01072	4.81538	15.5704	0.000540249	0.0375305	3	7	Down-regulated
Sus_scrofa___GAS2L3	-1.60564	2.99497	15.4064	0.000570586	0.0392325	3	7	Down-regulated
Sus_scrofa___ENSSSCG00000011355	-2.04817	1.50688	15.4201	0.000570608	0.0392325	3	7	Down-regulated
Sus_scrofa___CACNA2D1	-0.952202	9.88879	15.2395	0.000602741	0.0406899	3	7	Down-regulated
Sus_scrofa___HOMER1	-1.08371	9.1802	15.201	0.000610502	0.0407976	3	7	Down-regulated
Sus_scrofa___ESRRG	-0.866781	9.42614	15.1999	0.000610723	0.0407976	3	7	Down-regulated
Sus_scrofa___ENSSSCG00000041764	-0.88732	8.14598	15.1592	0.000619062	0.0412101	3	7	Down-regulated
Sus_scrofa___CCDC141	-0.945061	10.2254	15.0649	0.000638859	0.0417714	3	7	Down-regulated
Sus_scrofa___ATP2A2	-1.02927	11.4636	14.9599	0.000661674	0.0426888	3	7	Down-regulated
Sus_scrofa___OBSCN	-0.815638	9.89669	14.9533	0.000663159	0.0427023	3	7	Down-regulated
Sus_scrofa___GRB14	-1.01521	6.91237	14.9134	0.000672078	0.0430284	3	7	Down-regulated
Papio_anubis_FBXW7	-6.54552	0.483434	14.8814	0.000682484	0.0431309	3	7	Down-regulated
Sus_scrofa___CASD1	-0.728866	6.18094	14.7108	0.000719489	0.0450306	3	7	Down-regulated
Sus_scrofa___SVIL	-0.938012	10.5994	14.6804	0.000726893	0.0454091	3	7	Down-regulated
Sus_scrofa___TECRL	-1.08455	10.5069	14.6503	0.000734314	0.0457873	3	7	Down-regulated
Sus_scrofa___BAZ2B	-0.898775	8.15139	14.612	0.000743895	0.0461834	3	7	Down-regulated
Sus_scrofa___FHL1	-1.27172	9.20699	14.5939	0.000748456	0.0462555	3	7	Down-regulated
Sus_scrofa___MYO18B	-0.988518	10.1464	14.5928	0.000748729	0.0462555	3	7	Down-regulated
Sus_scrofa___PLEKHH1	-0.714704	5.042	14.5764	0.000752928	0.0464292	3	7	Down-regulated
Sus_scrofa___CREBBP	-0.747669	7.62516	14.4552	0.000784497	0.0477602	3	7	Down-regulated
Sus_scrofa___DLC1	-1.01618	11.3454	14.4317	0.000790793	0.0477724	3	7	Down-regulated
Sus_scrofa___STYXL2	-1.44674	7.29057	14.4223	0.000793328	0.0477724	3	7	Down-regulated
Sus_scrofa___TNNC1	-1.1402	7.33643	14.3982	0.000799871	0.047998	3	7	Down-regulated
Sus_scrofa___NR2C2	-0.682156	6.5621	14.326	0.000819783	0.0489298	3	7	Down-regulated
Sus_scrofa___CLSTN3	-2.89734	-1.82705	13.477	0.000824861	0.0490776	3	7	Down-regulated
Sus_scrofa___ASB12	-2.1975	0.122965	14.0011	0.00082706	0.0491016	3	7	Down-regulated
Sus_scrofa___LPP	-1.13336	11.2178	14.2563	0.000839526	0.0496655	3	7	Down-regulated

## Sheet: Endocardial lymphatic EC
Gene	logFC	logCPM	F	PValue	FDR	Observations_Extended	Observations_Standard	level
Sus_scrofa___HOMER1	4.85612	6.90113	47.7795	2.57639e-08	0.000474804	3	7	Up-regulated
Sus_scrofa___IRS2	4.71036	5.38925	40.2967	7.88194e-08	0.000492068	3	7	Up-regulated
Sus_scrofa___STXBP5L	5.84397	5.1494	43.8985	8.01022e-08	0.000492068	3	7	Up-regulated
Sus_scrofa___OASL	5.53159	4.81275	42.8683	3.11385e-07	0.0013722	3	7	Up-regulated
Sus_scrofa___HK2	4.77245	6.03388	38.3177	3.72295e-07	0.0013722	3	7	Up-regulated
Sus_scrofa___BNIP3	2.86759	6.68868	36.359	6.69999e-07	0.0020579	3	7	Up-regulated
Sus_scrofa___MAP7	4.59438	5.08389	31.4227	1.18611e-06	0.0031227	3	7	Up-regulated
Sus_scrofa___XIRP2	4.61767	4.46296	31.1325	2.04988e-06	0.00472215	3	7	Up-regulated
Sus_scrofa___ENSSSCG00000023041	4.50276	4.69135	27.1796	3.86879e-06	0.00792199	3	7	Up-regulated
Sus_scrofa___RETREG1	2.89306	6.91787	28.4863	5.1976e-06	0.00957866	3	7	Up-regulated
Sus_scrofa___EPB41L3	5.43436	6.64047	26.6282	7.92374e-06	0.0109805	3	7	Up-regulated
Sus_scrofa___RSAD2	3.92652	7.07711	26.3903	8.21079e-06	0.0109805	3	7	Up-regulated
Sus_scrofa___BVES	5.80332	4.42515	29.7179	8.50781e-06	0.0109805	3	7	Up-regulated
Sus_scrofa___GIPC2	6.87853	4.54592	28.0463	8.84686e-06	0.0109805	3	7	Up-regulated
Sus_scrofa___ENSSSCG00000029160	3.02016	7.27478	25.0194	9.12e-06	0.0109805	3	7	Up-regulated
Sus_scrofa___GBE1	2.04536	7.73428	26.9981	9.53321e-06	0.0109805	3	7	Up-regulated
Sus_scrofa___PLEKHA7	2.75304	5.60973	24.3062	1.52298e-05	0.0160924	3	7	Up-regulated
Sus_scrofa___HCN1	4.07983	4.65473	22.9412	1.59261e-05	0.0160924	3	7	Up-regulated
Sus_scrofa___HERC5	2.63831	7.44112	24.9042	1.6591e-05	0.0160924	3	7	Up-regulated
Sus_scrofa___DTNA	5.71392	6.01444	23.1444	2.13071e-05	0.0196335	3	7	Up-regulated
Sus_scrofa___DSP	4.3248	4.39358	22.3416	2.65695e-05	0.0233166	3	7	Up-regulated
Sus_scrofa___ENSSSCG00000022044	4.44801	4.47914	21.5358	3.07074e-05	0.0257231	3	7	Up-regulated
Sus_scrofa___TFRC	3.7216	5.01323	21.9043	3.36499e-05	0.0269623	3	7	Up-regulated
Sus_scrofa___E2F8	3.91693	4.61278	20.4586	4.39352e-05	0.0337367	3	7	Up-regulated
Sus_scrofa___CFAP299	2.97726	5.20895	20.3195	4.58766e-05	0.0338184	3	7	Up-regulated
Sus_scrofa___ISG15	3.26033	7.35789	20.6003	5.1958e-05	0.0350295	3	7	Up-regulated
Sus_scrofa___VEGFA	3.17768	5.0811	19.7897	5.28821e-05	0.0350295	3	7	Up-regulated
Sus_scrofa___KANK1	3.1734	5.64801	20.3168	5.51403e-05	0.0350295	3	7	Up-regulated
Sus_scrofa___NUDT5	3.36799	4.80032	19.7364	5.56647e-05	0.0350295	3	7	Up-regulated
Sus_scrofa___DOCK3	5.16855	5.6193	19.7425	6.15015e-05	0.0350295	3	7	Up-regulated
Sus_scrofa___METTL24	2.82007	4.98198	19.5383	6.22627e-05	0.0350295	3	7	Up-regulated
Sus_scrofa___CDC6	4.54811	4.27713	20.0421	6.33567e-05	0.0350295	3	7	Up-regulated
Sus_scrofa___INSR	2.41245	6.77083	20.4134	6.46266e-05	0.0350295	3	7	Up-regulated
Sus_scrofa___PPM1E	2.97079	7.05686	20.1087	6.96705e-05	0.0361886	3	7	Up-regulated
Sus_scrofa___DDX60	2.91434	6.3325	19.5724	7.5192e-05	0.0361886	3	7	Up-regulated
Sus_scrofa___SEMA4B	4.19272	4.278	19.309	7.56373e-05	0.0361886	3	7	Up-regulated
Sus_scrofa___KCND2	5.05786	4.71297	19.0355	7.79958e-05	0.0361886	3	7	Up-regulated
Sus_scrofa___ANO1	3.48568	4.55377	18.6368	7.88044e-05	0.0361886	3	7	Up-regulated
Sus_scrofa___CTSC	3.39863	5.7233	19.0788	7.98441e-05	0.0361886	3	7	Up-regulated
Sus_scrofa___PFKFB3	1.84095	6.9202	20.0249	8.08601e-05	0.0361886	3	7	Up-regulated
Sus_scrofa___PCP4	5.11488	4.87473	19.6111	8.24743e-05	0.0361886	3	7	Up-regulated
Sus_scrofa___ALPK2	4.7114	5.09632	18.4176	9.77304e-05	0.0416895	3	7	Up-regulated
Sus_scrofa___HEY2	4.86049	4.15312	19.5807	9.95355e-05	0.0416895	3	7	Up-regulated
Sus_scrofa___GJC1	2.03092	6.33923	19.0598	0.000106009	0.0434144	3	7	Up-regulated
Sus_scrofa___NRG4	3.79367	4.74655	18.2961	0.000112586	0.0444788	3	7	Up-regulated
Sus_scrofa___RRAGD	4.74871	4.30848	19.2017	0.000113435	0.0444788	3	7	Up-regulated
Sus_scrofa___NCAM1	3.71097	7.48819	18.53	0.000122087	0.0461593	3	7	Up-regulated
Sus_scrofa___GRIA1	2.90855	4.99428	17.7034	0.000122731	0.0461593	3	7	Up-regulated
Sus_scrofa___APOBEC2	4.93209	4.40464	18.5408	0.000136806	0.0488257	3	7	Up-regulated
Sus_scrofa___TMEM132C	2.43564	4.95423	17.3688	0.000143426	0.0488257	3	7	Up-regulated
Sus_scrofa___SYCP2	2.84225	6.71318	18.1313	0.000145613	0.0488257	3	7	Up-regulated
Sus_scrofa___PLEKHM3	3.6017	5.36651	17.3138	0.000147149	0.0488257	3	7	Up-regulated
Sus_scrofa___HSPB8	6.36579	4.46561	19.6156	0.000148512	0.0488257	3	7	Up-regulated
Sus_scrofa___SLC35A2	3.60323	4.26397	17.1438	0.000148602	0.0488257	3	7	Up-regulated
Sus_scrofa___SPAG16	2.84418	6.08829	17.7494	0.000152116	0.0488257	3	7	Up-regulated
Sus_scrofa___DMRT1	5.83317	4.07411	19.4722	0.000153665	0.0488257	3	7	Up-regulated
Sus_scrofa___SNAPC1	1.62944	7.00045	17.9834	0.000158315	0.0494505	3	7	Up-regulated
Sus_scrofa___ABI3BP	-2.07072	8.93262	20.7493	6.3994e-05	0.0350295	3	7	Down-regulated
Sus_scrofa___FMO1	-4.41	6.06964	17.9049	0.000150184	0.0488257	3	7	Down-regulated

## Sheet: Fibroblasts
Gene	logFC	logCPM	F	PValue	FDR	Observations_Extended	Observations_Standard	level
Sus_scrofa___ENSSSCG00000009293	2.25109	7.44466	35.4443	2.54507e-06	0.0275323	3	7	Up-regulated
Sus_scrofa___ENSSSCG00000032422	2.72871	4.12944	33.7438	3.57646e-06	0.0275323	3	7	Up-regulated
Sus_scrofa___NDRG1	1.84208	7.19706	33.2702	4.1374e-06	0.0275323	3	7	Up-regulated
Sus_scrofa___SHISA9	5.59511	5.88115	28.9388	8.06997e-06	0.0399796	3	7	Up-regulated
Sus_scrofa___H1-3	3.14626	3.15618	26.1638	1.03953e-05	0.0399796	3	7	Up-regulated
Sus_scrofa___IGFBP2	3.04499	5.05173	28.7457	1.05138e-05	0.0399796	3	7	Up-regulated
Sus_scrofa___PPP4R4	2.29773	3.26869	26.241	1.50003e-05	0.0499096	3	7	Up-regulated
Sus_scrofa___CA10	-3.17791	7.46075	48.6107	1.86795e-07	0.00497212	3	7	Down-regulated

## Sheet: Mural cells
Gene	logFC	logCPM	F	PValue	FDR	Observations_Extended	Observations_Standard	level
Sus_scrofa___PLAT	4.56114	5.61799	34.4236	3.73767e-07	0.00767045	3	7	Up-regulated
Sus_scrofa___KCNJ6	5.19546	4.47812	33.6578	9.35066e-07	0.00959471	3	7	Up-regulated
Sus_scrofa___RSAD2	4.07205	6.56002	29.9832	2.00959e-06	0.0108366	3	7	Up-regulated
Sus_scrofa___C1RL	2.96649	5.09936	29.5365	2.1122e-06	0.0108366	3	7	Up-regulated
Sus_scrofa___NDRG1	2.51123	6.18379	23.6227	1.97341e-05	0.0449982	3	7	Up-regulated
Sus_scrofa___ADAM22	-3.09345	7.42479	28.0532	5.35233e-06	0.0219681	3	7	Down-regulated
Sus_scrofa___SPARCL1	-1.48611	9.32479	25.9702	1.00135e-05	0.0342495	3	7	Down-regulated
Sus_scrofa___RCAN2	-1.88264	10.0307	25.1061	1.30713e-05	0.0383214	3	7	Down-regulated
Sus_scrofa___PLCB4	-1.70554	10.5438	24.0812	1.80219e-05	0.0449982	3	7	Down-regulated

## Sheet: Neuronal cells
Gene	logFC	logCPM	F	PValue	FDR	Observations_Extended	Observations_Standard	level
Sus_scrofa___VWA5A	3.18442	7.29068	24.8032	3.64733e-06	0.033182	3	7	Up-regulated
Sus_scrofa___MX2	2.92874	8.69837	24.578	4.65614e-06	0.033182	3	7	Up-regulated
Sus_scrofa___HERC5	2.56635	8.33688	22.8459	8.7272e-06	0.0414629	3	7	Up-regulated

## Sheet: Resident Immune
Gene	logFC	logCPM	F	PValue	FDR	Observations_Extended	Observations_Standard	level
Sus_scrofa___ENSSSCG00000029160	11.9414	8.7947	55.6691	1.08232e-10	1.83844e-06	3	7	Up-regulated
Sus_scrofa___RFC2	5.7131	7.8797	39.7132	1.13275e-08	7.52814e-05	3	7	Up-regulated
Sus_scrofa___ISG15	10.3121	7.81296	40.2729	1.43514e-08	7.52814e-05	3	7	Up-regulated
Sus_scrofa___FAM227B	4.91607	8.02966	38.1675	1.8611e-08	7.52814e-05	3	7	Up-regulated
Sus_scrofa___SLC3A1	4.31918	8.60838	37.7589	2.21598e-08	7.52814e-05	3	7	Up-regulated
Sus_scrofa___BRD2	4.7408	8.19571	35.4765	4.91491e-08	0.000139141	3	7	Up-regulated
Sus_scrofa___NFKBIA	4.62855	8.23154	33.9012	8.88594e-08	0.000215624	3	7	Up-regulated
Sus_scrofa___GADD45B	9.74129	6.83993	33.1123	1.51456e-07	0.000321578	3	7	Up-regulated
Sus_scrofa___HSPA8	4.80351	7.46374	28.1367	8.99763e-07	0.00135629	3	7	Up-regulated
Sus_scrofa___HSPH1	9.15804	7.05807	28.6975	9.0133e-07	0.00135629	3	7	Up-regulated
Sus_scrofa___SERP2	9.39746	6.20433	28.2497	9.33931e-07	0.00135629	3	7	Up-regulated
Sus_scrofa___DNAJB1	9.1725	6.48914	28.3107	9.58173e-07	0.00135629	3	7	Up-regulated
Sus_scrofa___CCL5	9.59791	6.94527	27.1916	1.46279e-06	0.0018028	3	7	Up-regulated
Sus_scrofa___GTF2IRD1	4.18521	7.35692	26.317	1.58847e-06	0.0018028	3	7	Up-regulated
Sus_scrofa___STAT5A	4.55714	7.11825	26.5074	1.59202e-06	0.0018028	3	7	Up-regulated
Sus_scrofa___CACYBP	4.15288	7.48499	25.5238	2.31338e-06	0.00231147	3	7	Up-regulated
Sus_scrofa___LHX4	10.0179	6.44411	25.8355	3.16437e-06	0.00298611	3	7	Up-regulated
Sus_scrofa___DIAPH3	8.92524	6.75007	24.7299	3.85401e-06	0.00319798	3	7	Up-regulated
Sus_scrofa___RSAD2	6.04951	7.648	24.6324	3.87725e-06	0.00319798	3	7	Up-regulated
Sus_scrofa___HSP90AA1	3.49762	7.89396	24.2021	3.9537e-06	0.00319798	3	7	Up-regulated
Sus_scrofa___ZNF367	9.31519	6.46039	24.3492	4.65461e-06	0.00343753	3	7	Up-regulated
Sus_scrofa___ENSSSCG00000037274	3.49517	8.40244	23.5958	5.15724e-06	0.00365004	3	7	Up-regulated
Sus_scrofa___RPL3L	9.42054	5.95963	23.6023	6.45872e-06	0.00438831	3	7	Up-regulated
Sus_scrofa___AMD1	3.83637	7.45403	22.7835	6.98011e-06	0.00440957	3	7	Up-regulated
Sus_scrofa___IRS2	8.81788	7.12619	23.3685	7.00921e-06	0.00440957	3	7	Up-regulated
Sus_scrofa___TOP2A	9.04872	6.39676	22.7656	8.95826e-06	0.00543447	3	7	Up-regulated
Sus_scrofa___HES1	8.30572	5.77613	21.6272	1.29033e-05	0.00707017	3	7	Up-regulated
Sus_scrofa___IFIH1	5.27446	7.69356	21.5335	1.37092e-05	0.007277	3	7	Up-regulated
Sus_scrofa___APOBEC2	4.82541	6.63865	20.8747	1.58926e-05	0.00818037	3	7	Up-regulated
Sus_scrofa___CSRP1	8.98376	5.93833	20.9592	1.69773e-05	0.00848166	3	7	Up-regulated
Sus_scrofa___SLIT2	3.48855	7.09644	20.5457	1.76775e-05	0.00857914	3	7	Up-regulated
Sus_scrofa___RRAD	4.01544	7.28662	19.9649	2.23128e-05	0.0104984	3	7	Up-regulated
Sus_scrofa___HERC5	3.87394	8.4523	19.9748	2.28682e-05	0.0104984	3	7	Up-regulated
Sus_scrofa___LRRFIP2	3.09789	7.99767	19.5346	2.82021e-05	0.0120647	3	7	Up-regulated
Sus_scrofa___NCL	3.98724	7.14515	19.4217	2.93971e-05	0.012179	3	7	Up-regulated
Sus_scrofa___NOCT	8.20479	5.98346	19.4396	3.32714e-05	0.013143	3	7	Up-regulated
Sus_scrofa___ENSSSCG00000013366	3.95073	7.01484	18.8751	3.8948e-05	0.0150357	3	7	Up-regulated
Sus_scrofa___TRA2B	2.82963	8.6792	18.6	4.36016e-05	0.0161004	3	7	Up-regulated
Sus_scrofa___GTF2F1	8.12531	6.0544	18.6378	4.66598e-05	0.0162411	3	7	Up-regulated
Sus_scrofa___GNA12	2.91269	8.22114	18.3302	4.77599e-05	0.0162411	3	7	Up-regulated
Sus_scrofa___HK2	3.33667	7.22969	18.1952	4.78073e-05	0.0162411	3	7	Up-regulated
Sus_scrofa___SPAG16	4.74941	6.21785	18.376	4.94834e-05	0.0164809	3	7	Up-regulated
Sus_scrofa___WDHD1	8.10038	6.21812	18.3725	5.15941e-05	0.0168257	3	7	Up-regulated
Sus_scrofa___IFIT1	3.80866	7.6018	18.0337	5.32421e-05	0.0168257	3	7	Up-regulated
Sus_scrofa___RRM1	4.73445	7.1147	18.213	5.44811e-05	0.0168257	3	7	Up-regulated
Sus_scrofa___DNAJB13	5.52201	6.09412	17.9385	6.18774e-05	0.0187688	3	7	Up-regulated
Sus_scrofa___IFIT2	5.12131	6.95102	17.781	6.58412e-05	0.0192824	3	7	Up-regulated
Sus_scrofa___ARAP2	8.12171	7.24451	17.66	6.82197e-05	0.019548	3	7	Up-regulated
Sus_scrofa___SMC4	7.70649	6.97855	17.7434	6.90497e-05	0.019548	3	7	Up-regulated
Sus_scrofa___TOB2	4.74747	6.43549	17.4697	7.45369e-05	0.0204207	3	7	Up-regulated
Sus_scrofa___PPP1R15B	7.73034	5.66736	17.4322	7.65957e-05	0.0206517	3	7	Up-regulated
Sus_scrofa___ARID4B	2.58714	9.35119	17.0636	8.65916e-05	0.0221624	3	7	Up-regulated
Sus_scrofa___NOP58	2.66461	7.56999	16.9193	8.71201e-05	0.0221624	3	7	Up-regulated
Sus_scrofa___HSPE1	8.33702	5.61489	17.166	8.73072e-05	0.0221624	3	7	Up-regulated
Sus_scrofa___RBM15	4.49633	6.36277	17.0994	8.7418e-05	0.0221624	3	7	Up-regulated
Sus_scrofa___WDR76	7.83756	6.25235	16.6792	0.000108165	0.026247	3	7	Up-regulated
Sus_scrofa___MFSD11	7.70007	6.5802	16.6339	0.000111825	0.0266341	3	7	Up-regulated
Sus_scrofa___ENO1	3.00241	8.00317	16.2184	0.000118156	0.0274932	3	7	Up-regulated
Sus_scrofa___SLC31A1	4.03911	6.2062	16.177	0.000122449	0.0277585	3	7	Up-regulated
Sus_scrofa___TCP1	4.58254	6.36491	16.2992	0.000123623	0.0277585	3	7	Up-regulated
Sus_scrofa___HIRA	4.32192	6.85351	16.2743	0.000126411	0.0278859	3	7	Up-regulated
Sus_scrofa___PHF12	3.50987	7.2452	15.9416	0.000136593	0.0297378	3	7	Up-regulated
Sus_scrofa___NUPR1	7.69904	5.94501	16.1262	0.000138307	0.0297378	3	7	Up-regulated
Sus_scrofa___FAM168B	3.64085	7.28719	15.9283	0.000140946	0.0299265	3	7	Up-regulated
Sus_scrofa___TUBB	3.46964	6.88604	15.6152	0.000155863	0.0326851	3	7	Up-regulated
Sus_scrofa___HBP1	3.62603	7.47444	15.5923	0.000163791	0.0335199	3	7	Up-regulated
Sus_scrofa___EZH2	3.40138	7.00968	15.4215	0.000170452	0.0344677	3	7	Up-regulated
Sus_scrofa___SNRPA	7.53634	5.72453	15.5459	0.000172729	0.0345174	3	7	Up-regulated
Sus_scrofa___MXD1	4.41258	6.51021	15.474	0.000178817	0.0350326	3	7	Up-regulated
Sus_scrofa___ATAD2	3.35803	7.64763	15.2535	0.000182164	0.0350326	3	7	Up-regulated
Sus_scrofa___SPEN	2.52861	8.8772	15.3169	0.000183557	0.0350326	3	7	Up-regulated
Sus_scrofa___PSMB7	7.3439	6.35307	15.4007	0.000190857	0.036021	3	7	Up-regulated
Sus_scrofa___H3-5	2.86369	7.99705	15.1048	0.000195274	0.0364497	3	7	Up-regulated
Sus_scrofa___CLU	3.95032	6.10624	14.9385	0.000213544	0.0390027	3	7	Up-regulated
Sus_scrofa___HSPD1	3.14962	6.81496	14.8334	0.000220646	0.0394514	3	7	Up-regulated
Sus_scrofa___UAP1	7.5499	6.30305	15.0453	0.000223164	0.0394861	3	7	Up-regulated
Sus_scrofa___TXNIP	2.90045	8.66858	14.7846	0.000226584	0.0395617	3	7	Up-regulated
Sus_scrofa___ENSSSCG00000051775	8.0728	5.35593	15.2219	0.000228249	0.0395617	3	7	Up-regulated
Sus_scrofa___KLF10	4.38733	6.04876	14.815	0.000237434	0.0403837	3	7	Up-regulated
Sus_scrofa___SLC25A6	7.4837	5.80797	14.7229	0.000254749	0.0424954	3	7	Up-regulated
Sus_scrofa___SLC25A17	3.57361	6.79241	14.5517	0.000260954	0.0426209	3	7	Up-regulated
Sus_scrofa___HSPB1	7.91856	5.81832	14.5715	0.000270786	0.0438055	3	7	Up-regulated
Sus_scrofa___HSPA5	3.01693	7.78237	14.2482	0.000290218	0.0449232	3	7	Up-regulated
Sus_scrofa___HSP90AB1	3.24032	6.91377	14.2579	0.000290734	0.0449232	3	7	Up-regulated
Sus_scrofa___GMNN	3.18222	6.59941	14.2055	0.000290919	0.0449232	3	7	Up-regulated
Sus_scrofa___ENSSSCG00000010525	4.26704	6.68342	14.348	0.000294765	0.0451071	3	7	Up-regulated
Sus_scrofa___BRIX1	3.55387	6.09495	14.1043	0.000313194	0.0470788	3	7	Up-regulated
Sus_scrofa___POLE	7.83202	5.67708	14.2654	0.000317986	0.0471739	3	7	Up-regulated
Sus_scrofa___TRIM33	2.94665	7.8467	14.0266	0.00031938	0.0471739	3	7	Up-regulated
Sus_scrofa___DHX15	2.99841	7.34949	13.8933	0.000339765	0.0491899	3	7	Up-regulated
Sus_scrofa___TNFAIP3	3.36072	7.37971	13.8997	0.000342427	0.0491899	3	7	Up-regulated
Sus_scrofa___RTKN2	7.62668	5.27519	14.0334	0.000343824	0.0491899	3	7	Up-regulated
Sus_scrofa___SERBP1	4.10263	6.74266	14.0069	0.000344613	0.0491899	3	7	Up-regulated
Sus_scrofa___GLIS3	2.50586	9.56226	13.9119	0.000351243	0.0497185	3	7	Up-regulated
Sus_scrofa___RNF139	3.27745	6.89478	13.832	0.000354382	0.0497482	3	7	Up-regulated
Sus_scrofa___ARL8B	3.1217	7.75966	13.7726	0.000363286	0.0498233	3	7	Up-regulated
Sus_scrofa___WEE1	7.4258	5.04721	13.8602	0.000365759	0.0498233	3	7	Up-regulated
Sus_scrofa___IGF2BP2	2.95393	7.17432	13.7169	0.00036665	0.0498233	3	7	Up-regulated
Sus_scrofa___GRIK2	-5.7347	7.80385	25.7767	2.12986e-06	0.00226111	3	7	Down-regulated
Sus_scrofa___GAS7	-5.56606	9.95436	24.1363	4.47009e-06	0.00343753	3	7	Down-regulated
Sus_scrofa___PIK3R5	-7.86734	8.44309	22.1788	1.00758e-05	0.00590164	3	7	Down-regulated
Sus_scrofa___ENSSSCG00000031640	-6.57449	9.21562	21.6014	1.27558e-05	0.00707017	3	7	Down-regulated
Sus_scrofa___ARHGAP15	-5.99687	10.4298	20.0433	2.40736e-05	0.0107609	3	7	Down-regulated
Sus_scrofa___ENSSSCG00000032896	-5.72732	9.44862	19.6466	2.84108e-05	0.0120647	3	7	Down-regulated
Sus_scrofa___HTR7	-7.90739	8.77679	19.343	3.28275e-05	0.013143	3	7	Down-regulated
Sus_scrofa___FGD2	-5.72083	8.53623	18.6874	4.24393e-05	0.0160194	3	7	Down-regulated
Sus_scrofa___MS4A7	-6.01817	8.65922	18.5856	4.46929e-05	0.0161522	3	7	Down-regulated
Sus_scrofa___GALNT13	-4.20706	5.90716	18.0585	5.44074e-05	0.0168257	3	7	Down-regulated
Sus_scrofa___HNMT	-4.84336	7.83657	17.7252	6.31989e-05	0.0188333	3	7	Down-regulated
Sus_scrofa___COLEC12	-4.43257	10.9748	17.4836	7.30543e-05	0.0203426	3	7	Down-regulated
Sus_scrofa___RUNX1	-4.29354	10.6834	17.0094	8.88872e-05	0.0222035	3	7	Down-regulated
Sus_scrofa___NLRP3	-5.08968	8.73287	16.5242	0.000107993	0.026247	3	7	Down-regulated
Sus_scrofa___INPP5D	-4.4474	9.54519	16.4313	0.000112896	0.0266341	3	7	Down-regulated
Sus_scrofa___IKZF1	-5.45549	8.64561	16.1926	0.000124199	0.0277585	3	7	Down-regulated
Sus_scrofa___LSAMP	-4.57466	9.76396	15.6768	0.000158541	0.0328412	3	7	Down-regulated
Sus_scrofa___DOCK11	-4.35975	8.46551	15.3416	0.000180314	0.0350326	3	7	Down-regulated
Sus_scrofa___HACD1	-4.34177	5.9187	15.0748	0.000199219	0.0367819	3	7	Down-regulated
Sus_scrofa___IQGAP2	-3.91609	10.3711	14.9787	0.000218401	0.0394514	3	7	Down-regulated
Sus_scrofa___MCTP1	-3.75377	9.63435	14.78	0.000237747	0.0403837	3	7	Down-regulated
Sus_scrofa___DAB2	-3.85455	10.8891	14.6435	0.000255183	0.0424954	3	7	Down-regulated
Sus_scrofa___SHTN1	-4.13573	7.62207	14.5367	0.000258167	0.0425749	3	7	Down-regulated
Sus_scrofa___BANK1	-4.24759	9.79593	14.4439	0.000274597	0.0440028	3	7	Down-regulated
Sus_scrofa___ENSSSCG00000035736	-4.80579	7.16511	14.2697	0.000288957	0.0449232	3	7	Down-regulated
Sus_scrofa___ACTC1	-3.75473	6.01023	14.2103	0.00029932	0.0453951	3	7	Down-regulated
Sus_scrofa___DNM1	-4.12693	8.2701	13.7959	0.000362706	0.0498233	3	7	Down-regulated

## Sheet: Vascular EC
Gene	logFC	logCPM	F	PValue	FDR	Observations_Extended	Observations_Standard	level
Sus_scrofa___TMEM156	3.76611	4.58438	45.3335	2.77664e-08	0.000451075	3	7	Up-regulated
Sus_scrofa___CDA	2.697	5.67928	49.1028	3.91201e-08	0.000451075	3	7	Up-regulated
Sus_scrofa___TMEM132C	3.24513	4.88411	43.533	1.07577e-07	0.000826947	3	7	Up-regulated
Sus_scrofa___FAM13A	1.58397	7.88562	35.721	9.31274e-07	0.00536903	3	7	Up-regulated
Sus_scrofa___RGS2	2.64782	6.31222	34.2787	1.25786e-06	0.0058015	3	7	Up-regulated
Sus_scrofa___BNIP3	1.95985	6.19926	30.7247	3.45791e-06	0.0106899	3	7	Up-regulated
Sus_scrofa___ENSSSCG00000049674	5.32767	3.745	30.2465	4.63162e-06	0.0118678	3	7	Up-regulated
Sus_scrofa___CCL5	5.80721	3.58619	25.6727	1.23345e-05	0.026548	3	7	Up-regulated
Sus_scrofa___CDH18	3.18574	4.05615	24.1241	1.47009e-05	0.026548	3	7	Up-regulated
Sus_scrofa___PLOD2	1.68845	7.36567	25.4944	1.49657e-05	0.026548	3	7	Up-regulated
Sus_scrofa___TRHDE	3.47197	3.28204	22.6248	2.02688e-05	0.033387	3	7	Up-regulated
Sus_scrofa___ASS1	-2.89158	6.0942	31.9588	2.14243e-06	0.00823443	3	7	Down-regulated
Sus_scrofa___ADAMTSL3	-2.69166	6.8598	30.2391	3.7084e-06	0.0106899	3	7	Down-regulated
Sus_scrofa___ITGA9	-1.63768	8.73943	25.5746	1.45599e-05	0.026548	3	7	Down-regulated
Sus_scrofa___MEOX2	-1.48031	8.69831	23.5833	2.64729e-05	0.0406995	3	7	Down-regulated

## Sheet: Lymphoids baboon 
Gene	logFC	logCPM	F	PValue	FDR	Observations_Extended	Observations_Standard	level
Papio_anubis_U3-96	3.68969	6.01839	41.3382	9.52388e-08	0.00200392	3	7	Up-regulated
Papio_anubis_VWF	3.63657	5.77124	31.3843	1.48046e-06	0.0155752	3	7	Up-regulated
Papio_anubis_RBFOX2	4.59975	5.05115	28.0893	5.798e-06	0.0304989	3	7	Up-regulated
Papio_anubis_AFF3	-1.71947	10.4364	31.0705	2.78845e-06	0.0195573	3	7	Down-regulated

## Sheet: Myeloids baboon 
Gene	logFC	logCPM	F	PValue	FDR	Observations_Extended	Observations_Standard	level
Papio_anubis_COL4A2	5.09563	6.43189	47.9532	1.5715e-07	0.00312044	3	7	Up-regulated
Papio_anubis_COL4A1	5.85116	5.94549	39.3195	3.92953e-07	0.00312044	3	7	Up-regulated
Papio_anubis_MECOM	4.31981	5.30135	40.8036	4.11626e-07	0.00312044	3	7	Up-regulated
Papio_anubis_ENSPANG00000025652	4.71938	3.92504	36.5736	5.57748e-07	0.00312044	3	7	Up-regulated
Papio_anubis_KIAA1217	4.55609	5.23982	39.4548	6.56892e-07	0.00312044	3	7	Up-regulated
Papio_anubis_HSPG2	4.14218	5.28454	39.6053	7.08492e-07	0.00312044	3	7	Up-regulated
Papio_anubis_UNC5B	3.31673	4.1219	36.2618	9.35653e-07	0.00353222	3	7	Up-regulated
Papio_anubis_ADGRL4	5.29973	4.50735	34.3457	1.11921e-06	0.0036359	3	7	Up-regulated
Papio_anubis_PALLD	2.20113	7.06504	38.6415	1.23829e-06	0.0036359	3	7	Up-regulated
Papio_anubis_EMCN	4.89437	4.66006	33.5977	1.39888e-06	0.00363795	3	7	Up-regulated
Papio_anubis_FBXL7	4.37554	6.1702	36.416	1.5149e-06	0.00363795	3	7	Up-regulated
Papio_anubis_PLPP3	4.14053	4.49131	33.2247	1.67256e-06	0.00363795	3	7	Up-regulated
Papio_anubis_SLC35F3	2.48251	7.23208	37.823	1.78965e-06	0.00363795	3	7	Up-regulated
Papio_anubis_ERG	3.53699	4.56695	34.8052	2.03075e-06	0.00365969	3	7	Up-regulated
Papio_anubis_ENSPANG00000037187	4.12199	3.58092	31.2251	2.07732e-06	0.00365969	3	7	Up-regulated
Papio_anubis_PTPRG	5.98272	5.33407	31.1812	2.54234e-06	0.00383665	3	7	Up-regulated
Papio_anubis_COL12A1	5.16654	3.95303	30.9843	2.65184e-06	0.00383665	3	7	Up-regulated
Papio_anubis_GRM8	2.53656	5.4579	34.8087	2.7337e-06	0.00383665	3	7	Up-regulated
Papio_anubis_RAPGEF5	4.5076	5.03807	31.1867	2.95923e-06	0.00383665	3	7	Up-regulated
Papio_anubis_KITLG	4.07838	4.91665	32.134	3.1683e-06	0.00383665	3	7	Up-regulated
Papio_anubis_PDE10A	2.9855	4.66251	33.3369	3.30738e-06	0.00383665	3	7	Up-regulated
Sus_scrofa___USF2	3.39886	3.44111	30.243	3.33392e-06	0.00383665	3	7	Up-regulated
Papio_anubis_EBF1	4.02893	4.79001	31.9065	3.33925e-06	0.00383665	3	7	Up-regulated
Papio_anubis_ARHGEF28	5.01347	3.91125	30.0995	4.01481e-06	0.00434665	3	7	Up-regulated
Papio_anubis_FAT4	4.09837	3.6136	29.3238	4.25791e-06	0.00434665	3	7	Up-regulated
Papio_anubis_ADAMTSL1	2.87668	4.65297	32.2693	4.27658e-06	0.00434665	3	7	Up-regulated
Papio_anubis_ENSPANG00000051176	2.63113	4.16203	31.3047	4.74025e-06	0.00443239	3	7	Up-regulated
Papio_anubis_GRB10	5.03167	4.30003	28.3289	4.951e-06	0.00443239	3	7	Up-regulated
Papio_anubis_KDR	5.93663	4.14143	30.6313	5.26401e-06	0.00443239	3	7	Up-regulated
Papio_anubis_VEGFC	4.71195	3.6722	28.1068	5.4084e-06	0.00443239	3	7	Up-regulated
Papio_anubis_PREX2	3.4882	4.56108	29.4386	5.41924e-06	0.00443239	3	7	Up-regulated
Papio_anubis_VEGFA	3.28276	4.85449	29.5839	5.53504e-06	0.00443239	3	7	Up-regulated
Papio_anubis_NDRG1	2.32842	6.24731	31.1189	6.08053e-06	0.00467436	3	7	Up-regulated
Papio_anubis_CYYR1	3.94182	4.03425	28.875	6.32593e-06	0.00467436	3	7	Up-regulated
Papio_anubis_U3-96	3.36213	5.66107	31.2498	6.50559e-06	0.00467436	3	7	Up-regulated
Papio_anubis_ADAMTS9	6.31324	4.44772	29.9768	6.54474e-06	0.00467436	3	7	Up-regulated
Papio_anubis_SERPINE1	3.20084	3.63607	27.0164	8.04336e-06	0.0055047	3	7	Up-regulated
Papio_anubis_CACNA1C	6.38515	4.48097	28.8936	8.12394e-06	0.0055047	3	7	Up-regulated
Papio_anubis_ENG	2.00837	5.46121	29.2663	8.72191e-06	0.00570721	3	7	Up-regulated
Papio_anubis_SLC2A1	2.67636	4.83964	28.2362	8.85475e-06	0.00570721	3	7	Up-regulated
Papio_anubis_EGLN3	2.60063	6.19006	29.8705	9.69376e-06	0.00609922	3	7	Up-regulated
Papio_anubis_EGFL7	3.09133	4.56583	28.0872	9.97327e-06	0.00612915	3	7	Up-regulated
Papio_anubis_WWTR1	2.82891	5.09408	27.8036	1.14234e-05	0.00686079	3	7	Up-regulated
Papio_anubis_SPTBN1	3.47975	6.18405	28.2555	1.28617e-05	0.00755298	3	7	Up-regulated
Papio_anubis_ITGB8	2.74761	4.44107	27.0829	1.56547e-05	0.00897732	3	7	Up-regulated
Papio_anubis_LHFPL6	5.1802	4.64257	26.7227	1.59666e-05	0.00897732	3	7	Up-regulated
Papio_anubis_PLOD2	3.11446	5.36793	27.1934	1.67487e-05	0.00922083	3	7	Up-regulated
Papio_anubis_MAGI1	5.05342	5.65321	25.9628	1.7727e-05	0.00956027	3	7	Up-regulated
Papio_anubis_PCDH17	5.54249	3.8648	25.6401	1.8983e-05	0.0100329	3	7	Up-regulated
Papio_anubis_ENSPANG00000039647	2.87251	6.12002	26.3573	2.00737e-05	0.0104013	3	7	Up-regulated
Papio_anubis_PIEZO2	5.22124	3.71677	25.3242	2.32607e-05	0.0118209	3	7	Up-regulated
Papio_anubis_SOBP	3.29022	3.3371	22.6107	2.4548e-05	0.0122397	3	7	Up-regulated
Papio_anubis_NUAK1	3.604	4.06881	23.6094	2.50906e-05	0.0122786	3	7	Up-regulated
Papio_anubis_POSTN	3.67708	3.75612	23.1166	2.59478e-05	0.0124672	3	7	Up-regulated
Papio_anubis_LAMA4	4.26798	4.18993	23.719	2.7702e-05	0.0130724	3	7	Up-regulated
Papio_anubis_ATP6V0D2	4.02861	4.85771	23.9529	3.01094e-05	0.0139591	3	7	Up-regulated
Papio_anubis_EFNB2	2.83333	3.61765	23.0723	3.09488e-05	0.0141009	3	7	Up-regulated
Papio_anubis_ENSPANG00000023537	1.74724	6.71011	24.7164	3.20451e-05	0.0142707	3	7	Up-regulated
Papio_anubis_RUNX1T1	3.88568	3.55601	22.0229	3.29624e-05	0.0142707	3	7	Up-regulated
Papio_anubis_ENSPANG00000025786	5.99536	2.97613	25.8618	3.34043e-05	0.0142707	3	7	Up-regulated
Papio_anubis_NCKAP1	3.80836	4.15658	22.8147	3.34814e-05	0.0142707	3	7	Up-regulated
Papio_anubis_CEMIP	2.97557	3.84927	23.0431	3.54972e-05	0.0147742	3	7	Up-regulated
Papio_anubis_TSPAN18	2.53972	4.85919	23.6097	3.65155e-05	0.0147742	3	7	Up-regulated
Papio_anubis_FERMT2	2.44742	4.25372	23.2826	3.65385e-05	0.0147742	3	7	Up-regulated
Papio_anubis_EYA2	2.9885	4.95841	24.2324	3.6899e-05	0.0147742	3	7	Up-regulated
Papio_anubis_COL6A2	5.33718	3.43399	24.3534	3.81201e-05	0.0150353	3	7	Up-regulated
Papio_anubis_DOCK9	4.1989	4.3288	22.0491	3.88808e-05	0.0151098	3	7	Up-regulated
Papio_anubis_RBPMS	3.52313	5.70624	23.6408	3.98564e-05	0.0152644	3	7	Up-regulated
Papio_anubis_HEG1	2.03406	4.83832	24.0197	4.09405e-05	0.0154556	3	7	Up-regulated
Papio_anubis_ENSPANG00000044827	3.15287	2.91703	21.8515	4.64712e-05	0.0168925	3	7	Up-regulated
Papio_anubis_FBLIM1	2.84888	3.42457	21.2261	4.6816e-05	0.0168925	3	7	Up-regulated
Papio_anubis_DACH1	5.90321	3.74836	22.8949	4.77043e-05	0.0168925	3	7	Up-regulated
Papio_anubis_COL1A2	6.6344	4.25219	23.613	4.83315e-05	0.0168925	3	7	Up-regulated
Papio_anubis_EPAS1	2.39728	5.11195	22.8737	4.84051e-05	0.0168925	3	7	Up-regulated
Papio_anubis_MYO1B	2.91844	4.71868	22.3976	4.85821e-05	0.0168925	3	7	Up-regulated
Papio_anubis_RAI14	8.29717	4.83249	26.2428	4.9823e-05	0.017099	3	7	Up-regulated
Papio_anubis_COL5A3	5.05614	3.26122	23.2847	5.1456e-05	0.017433	3	7	Up-regulated
Papio_anubis_COL6A3	3.09655	4.54705	21.8016	5.21664e-05	0.01745	3	7	Up-regulated
Papio_anubis_PRKG1	3.0126	6.15398	22.5428	5.36559e-05	0.0177239	3	7	Up-regulated
Papio_anubis_IGFBP7	2.74273	6.61597	22.4368	5.81086e-05	0.0189577	3	7	Up-regulated
Papio_anubis_CPQ	1.35674	9.71481	22.6022	6.07751e-05	0.0195859	3	7	Up-regulated
Papio_anubis_GALNT18	2.88989	4.44764	21.4818	6.23413e-05	0.0198486	3	7	Up-regulated
Papio_anubis_DENND2A	2.43441	4.46369	21.407	6.34342e-05	0.0199561	3	7	Up-regulated
Papio_anubis_EBF3	4.07924	3.48351	20.0337	7.07881e-05	0.0220076	3	7	Up-regulated
Papio_anubis_MXI1	1.72062	7.23677	21.9013	7.36032e-05	0.022339	3	7	Up-regulated
Papio_anubis_CALD1	3.07325	5.79778	21.3733	7.36217e-05	0.022339	3	7	Up-regulated
Papio_anubis_CD36	2.78886	4.84747	21.0753	7.45285e-05	0.022339	3	7	Up-regulated
Papio_anubis_SLC2A5	1.62156	7.94245	21.6414	7.52353e-05	0.022339	3	7	Up-regulated
Papio_anubis_ENSPANG00000039055	2.2038	4.98851	21.5432	7.66794e-05	0.0225148	3	7	Up-regulated
Papio_anubis_SLFN5	2.8673	5.257	21.1956	8.41387e-05	0.0244335	3	7	Up-regulated
Papio_anubis_GBE1	1.41033	8.08622	21.3187	8.61982e-05	0.0247595	3	7	Up-regulated
Papio_anubis_RASGRF2	4.13271	3.33045	19.7552	8.76872e-05	0.0249164	3	7	Up-regulated
Papio_anubis_ZFPM2	3.1736	5.59322	21.2228	9.00292e-05	0.0253097	3	7	Up-regulated
Papio_anubis_MSRB3	3.08545	4.22499	20.0769	9.47489e-05	0.0263562	3	7	Up-regulated
Papio_anubis_SYT1	3.11053	3.4998	19.0454	9.91316e-05	0.027046	3	7	Up-regulated
Papio_anubis_ITGA1	3.03759	5.51081	20.662	9.92758e-05	0.027046	3	7	Up-regulated
Papio_anubis_AMOTL1	4.82062	3.23055	20.7835	0.000103587	0.0277227	3	7	Up-regulated
Papio_anubis_CDH13	1.89245	5.95445	20.3518	0.000103858	0.0277227	3	7	Up-regulated
Papio_anubis_ADGRF5	6.04196	3.75072	21.2698	0.000104913	0.0277243	3	7	Up-regulated
Papio_anubis_VWF	2.57073	8.28834	20.5752	0.000106405	0.0278403	3	7	Up-regulated
Papio_anubis_CD109	2.28305	5.9679	20.3336	0.000111096	0.0287791	3	7	Up-regulated
Papio_anubis_AFAP1L1	3.4131	4.09444	19.3425	0.000112171	0.0287791	3	7	Up-regulated
Papio_anubis_RBFOX2	3.25342	4.608	19.3369	0.000114443	0.0290794	3	7	Up-regulated
Papio_anubis_RBMS3	2.70454	7.33284	20.0085	0.000117203	0.0294971	3	7	Up-regulated
Papio_anubis_SYTL3	1.56398	7.18813	20.2194	0.000120583	0.0300616	3	7	Up-regulated
Papio_anubis_PDE3A	2.98493	4.71353	19.1183	0.000125171	0.0308254	3	7	Up-regulated
Papio_anubis_HES1	3.45441	2.98444	18.5594	0.00012598	0.0308254	3	7	Up-regulated
Papio_anubis_BNIP3	2.12664	5.65063	20.183	0.000130236	0.0315354	3	7	Up-regulated
Papio_anubis_MAP1B	2.93201	3.53131	18.7097	0.000131268	0.0315354	3	7	Up-regulated
Papio_anubis_COL8A1	3.5589	3.50347	18.0685	0.000137222	0.0326687	3	7	Up-regulated
Papio_anubis_ENSPANG00000039094	2.58247	3.71729	18.5855	0.00014005	0.0330443	3	7	Up-regulated
Papio_anubis_PDE1C	7.2003	3.70514	21.1018	0.000152835	0.0357418	3	7	Up-regulated
Papio_anubis_CHSY1	1.46686	8.09089	19.1679	0.000158527	0.0367477	3	7	Up-regulated
Papio_anubis_SLC1A3	1.94545	8.20156	19.2706	0.000173244	0.0394668	3	7	Up-regulated
Papio_anubis_ZNF608	2.41936	4.82725	18.3182	0.000186942	0.0422232	3	7	Up-regulated
Papio_anubis_SERPINI1	2.1935	5.80292	18.1896	0.000192169	0.0426745	3	7	Up-regulated
Papio_anubis_SYNJ2	1.94176	4.71074	18.2192	0.000197876	0.0435755	3	7	Up-regulated
Papio_anubis_LMNA	1.80033	5.22874	18.4451	0.000199751	0.0436249	3	7	Up-regulated
Papio_anubis_ENSPANG00000025939	6.20225	3.08711	18.8097	0.000214693	0.0465039	3	7	Up-regulated
Papio_anubis_TEAD1	2.37118	5.22526	17.7601	0.00023176	0.0494452	3	7	Up-regulated
Papio_anubis_HTRA1	2.7646	3.57464	17.2024	0.000234226	0.0495173	3	7	Up-regulated
Papio_anubis_ADGB	-1.74185	5.93836	32.6115	5.09188e-06	0.00443239	3	7	Down-regulated
Papio_anubis_ENSPANG00000007559	-1.56988	5.56671	19.3071	0.000164715	0.0378501	3	7	Down-regulated
Papio_anubis_GKAP1	-1.95656	4.1142	18.8321	0.000189173	0.0423652	3	7	Down-regulated
Papio_anubis_HLA-DMB	-1.4762	7.05304	17.8217	0.000232014	0.0494452	3	7	Down-regulated
