# Supplementary material for: Integrated Molecular Profiling of Preclinical and Clinical Cardiac Xenotransplants
Source: Research Square preprint supplement (doi:10.21203/rs.3.rs-8406985/v1), 2026-02-04
Supplement: Supplementary file 14 [file 5e2abeac40647a9b6996fd6b.xlsx]

## Sheet: PCMV_PRV_Vasc_Ecs_enrichment
Gene_set	Term	Overlap	P-value	Adjusted P-value	Old P-value	Old Adjusted P-value	Odds Ratio	Combined Score	Genes	Regulation
MSigDB_Hallmark_2020	Interferon Alpha Response	1997-12-01	1.20057e-08	5.28253e-07	0	0	10.2656	187.223	ISG20;CXCL10;PLSCR1;IL4R;CASP8;CNP;MX1;IRF7;TXNIP;ISG15;OASL;PSMB9	Up-regulated
MSigDB_Hallmark_2020	Interferon Gamma Response	16/200	2.64676e-08	5.82288e-07	0	0	6.38575	111.414	CDKN1A;IL4R;MX1;ISG15;IFIT1;HIF1A;PSMB9;OASL;ISG20;CXCL10;PLSCR1;SOCS1;CASP8;CCL5;IRF7;TXNIP	Up-regulated
MSigDB_Hallmark_2020	TNF-alpha Signaling via NF-kB	13/200	5.58159e-06	8.18633e-05	0	0	5.04747	61.0544	PPP1R15A;CDKN1A;DUSP2;CEBPB;CEBPD;CD80;SERPINE1;FOSL1;CXCL10;NFIL3;CCL5;ACKR3;MAP3K8	Up-regulated
MSigDB_Hallmark_2020	Hypoxia	12/200	2.84471e-05	0.000312918	0	0	4.61702	48.3285	ISG20;PPP1R15A;CDKN1A;TPI1;NFIL3;CITED2;SERPINE1;DDIT4;STC1;ACKR3;ADM;ENO1	Up-regulated
MSigDB_Hallmark_2020	Apoptosis	9/161	0.000478668	0.00312389	0	0	4.24364	32.4405	ISG20;CDKN1A;CASP8;MGMT;TXNIP;HSPB1;EMP1;NEDD9;H1-0	Up-regulated
MSigDB_Hallmark_2020	IL-2/STAT5 Signaling	10/199	0.000546234	0.00312389	0	0	3.79883	28.5385	CXCL10;ECM1;PLSCR1;IL4R;SOCS1;NFIL3;CISH;GSTO1;EMP1;MAP3K8	Up-regulated
MSigDB_Hallmark_2020	Complement	10/200	0.000567979	0.00312389	0	0	3.77864	28.2394	CDA;PLSCR1;USP15;CEBPB;KCNIP2;CCL5;SERPINE1;IRF7;CD59;PSMB9	Up-regulated
MSigDB_Hallmark_2020	p53 Pathway	10/200	0.000567979	0.00312389	0	0	3.77864	28.2394	PPP1R15A;CDKN1A;RAP2B;SOCS1;ZMAT3;DDIT4;OSGIN1;TXNIP;XPC;TAX1BP3	Up-regulated
MSigDB_Hallmark_2020	mTORC1 Signaling	9/200	0.00219675	0.0107397	0	0	3.3704	20.6295	PPP1R15A;CDKN1A;TPI1;NFIL3;PSMD14;DDIT4;STC1;PLOD2;ENO1	Up-regulated
MSigDB_Hallmark_2020	Inflammatory Response	8/200	0.0076379	0.0305516	0	0	2.96928	14.4742	CXCL10;CDKN1A;IL4R;CCL5;SERPINE1;IRF7;ADM;HIF1A	Up-regulated
MSigDB_Hallmark_2020	Glycolysis	8/200	0.0076379	0.0305516	0	0	2.96928	14.4742	ISG20;TPI1;CITED2;DDIT4;STC1;PLOD2;ENO1;SLC16A3	Up-regulated
MSigDB_Hallmark_2020	UV Response Dn	10/144	1.33188e-05	0.00045284	0	0	6.12534	68.7651	INPP4B;DAB2;MMP16;ITGB3;DLC1;MAGI2;FHL2;ATP2B4;LAMC1;RUNX1	Down-regulated
MSigDB_Hallmark_2020	Epithelial Mesenchymal Transition	10/200	0.000212551	0.00361336	0	0	4.30764	36.4268	DAB2;VCAM1;FAP;CDH2;ITGB5;DST;CALD1;ITGB3;LAMC2;LAMC1	Down-regulated
MSigDB_Hallmark_2020	Apical Junction	9/200	0.000932469	0.010568	0	0	3.84031	26.7965	LIMA1;MAPK11;VCAM1;VWF;ITGB4;PARVA;LAMC2;JAM3;ITGA9	Down-regulated
