# Supplementary material for: Integrated Molecular Profiling of Preclinical and Clinical Cardiac Xenotransplants
Source: Research Square preprint supplement (doi:10.21203/rs.3.rs-8406985/v1), 2026-02-04
Supplement: Supplementary file 15 [file 6077756f88f84384789e4808.xlsx]

## Sheet: Sheet1
Pathway name	contribution_3month_protocol	contribution_6month_protocol	pvalues_3month_protocol	pvalues_6month_protocol
VEGF	0	0.000171751	0	0
VISFATIN	0	0.000163989	0	0
HSPG	0	0.000135994	0	0
SEMA4	0	8.19393e-05	0	0
GHRELIN	0	6.39995e-05	0	0
RELN	0	2.26269e-05	0	0
IL1	0	7.99994e-06	0	0
MPZ	0	7.99994e-06	0	0
CCL	0	5.99996e-06	0	0
KIT	1.7361e-05	0.000191993	0.00708641	0.00708641
FN1	8.0294e-05	0.000565436	0.000213722	0.000213722
JAM	8.68048e-06	3.19997e-05	0.185877	0.185877
NCAM	0.000451337	0.00102349	0.8125	0.8125
CSF	1.7361e-05	3.19997e-05	0.577469	0.577469
ANGPT	5.20824e-05	9.59977e-05	0.46875	0.46875
BMP	0.00041665	0.000693694	0.0078125	0.0078125
COLLAGEN	0.00582337	0.00891061	0.129007	0.129007
PDGF	0.000555486	0.000743879	0.755306	0.755306
PTPRM	0.03118	0.0332985	0.55873	0.55873
CDH5	8.68048e-06	7.99994e-06	0	0
ESAM	8.68048e-06	7.99994e-06	0	0
LAMININ	0.0082326	0.00746534	0.54614	0.54614
FGF	0.000121525	9.59969e-05	0.0969382	0.0969382
SEMA6	0.000520775	0.00041596	0.609134	0.609134
PECAM1	0.00195265	0.00135179	0.140164	0.140164
EPHB	1.30207e-05	7.99994e-06	0	0
CD45	0.0013669	0.000811888	0.369313	0.369313
TENASCIN	0.000125427	6.39992e-05	0.182355	0.182355
APP	0.000683519	0.00033599	0.337954	0.337954
SEMA3	0.00126305	0.000612463	0.375732	0.375732
NOTCH	0.000119357	5.19996e-05	0.0142819	0.0142819
EPHA	0.00028642	0.000119993	0.3125	0.3125
IGF	0.000676945	0.000263956	0.00097716	0.00097716
NRG	0.000726637	0.00019198	0	0
CDH	0.0117441	0.00385707	0	0
CADM	4.34025e-05	7.99994e-06	0.0126438	0.0126438
THBS	0.000833198	0.000171308	0.03125	0.03125
CD99	2.17013e-06	0	0	0
NEGR	8.68048e-06	0	0	0
NGL	8.68048e-06	0	0	0
NRXN	0.000104156	0	0	0
