# Supplementary material for: Integrated Molecular Profiling of Preclinical and Clinical Cardiac Xenotransplants
Source: Research Square preprint supplement (doi:10.21203/rs.3.rs-8406985/v1), 2026-02-04
Supplement: Supplementary file 16 [file 63ead6fefcbebd63ac472d6a.xlsx]

## Sheet: NK
Gene	scores	log2FC	pvals	FDR
Homo_sapiens_TXK	7.11019	3.16848	1.15886e-12	2.76548e-08
Homo_sapiens_AOAH	6.67506	2.25612	2.47131e-11	2.74702e-07
Homo_sapiens_PDGFD	6.64624	5.73201	3.00673e-11	2.74702e-07
Homo_sapiens_C1orf21	5.94119	4.6722	2.82962e-09	2.06817e-05
Homo_sapiens_NCAM1	5.88639	6.34679	3.94717e-09	2.40415e-05
Homo_sapiens_KCNQ5	5.65868	3.06465	1.52541e-08	7.96371e-05
Homo_sapiens_KLRF1	5.43584	8.28452	5.45386e-08	0.000249139
Homo_sapiens_JAZF1	5.18215	2.12676	2.1934e-07	0.000801579
Homo_sapiens_ZBTB16	5.11355	2.99851	3.16152e-07	0.00105034
Homo_sapiens_CD247	5.05632	1.2883	4.27418e-07	0.00120154
Homo_sapiens_APBA2	5.00558	3.41464	5.56927e-07	0.00145378
Homo_sapiens_PLCL2	4.84322	1.89404	1.27749e-06	0.00291787
Homo_sapiens_MCTP2	4.73038	1.43424	2.24097e-06	0.00454978
Homo_sapiens_MAPK1	4.68086	1.84217	2.8567e-06	0.00549463
Homo_sapiens_UTRN	4.24858	1.05175	2.15132e-05	0.0357364
Homo_sapiens_DPYD	4.22747	1.1382	2.36333e-05	0.0375513

## Sheet: CD4T_reg
Gene	scores	log2FC	pvals	FDR
Homo_sapiens_PAM	7.29449	1.67987	2.99794e-13	1.0956e-08
Homo_sapiens_NAMPT	6.3648	2.49068	1.95545e-10	2.70277e-06
Homo_sapiens_SNX9	6.34538	1.83133	2.21872e-10	2.70277e-06
Homo_sapiens_JARID2	6.24928	1.64849	4.1236e-10	3.76743e-06
Homo_sapiens_MIR155HG	5.88232	2.65373	4.04559e-09	2.95692e-05
Homo_sapiens_RNF19A	5.74414	1.42699	9.23876e-09	5.62717e-05
Homo_sapiens_SHC4	5.68557	3.7348	1.30375e-08	6.80652e-05
Homo_sapiens_CD109	5.56714	3.29003	2.5896e-08	0.000118296
Homo_sapiens_ZC3H12C	5.19371	2.05387	2.06147e-07	0.000753365
Homo_sapiens_SIPA1L1	5.06233	1.02894	4.14169e-07	0.00126991
Homo_sapiens_SLA	4.95101	1.29463	7.3829e-07	0.00207545
Homo_sapiens_NEBL	4.84196	3.30337	1.28565e-06	0.00335601
Homo_sapiens_PRKCA	4.7465	1.20379	2.06968e-06	0.00472729
Homo_sapiens_TBC1D4	4.59473	2.70101	4.33306e-06	0.00833429
Homo_sapiens_IL2RA	4.57564	2.7444	4.74766e-06	0.00867517
Homo_sapiens_MYO1E	4.50315	1.69794	6.69521e-06	0.0116513
Homo_sapiens_ENSG00000234261	4.4407	1.42432	8.96664e-06	0.0148948
Homo_sapiens_IGF2R	4.40122	1.15133	1.07643e-05	0.0171035
Homo_sapiens_UBASH3B	4.26499	1.18046	1.99913e-05	0.0292232
Homo_sapiens_LRBA	4.24848	0.860014	2.15221e-05	0.030251
Homo_sapiens_CDK6	4.17341	1.26001	3.00073e-05	0.0406155

## Sheet: CD8T_em
Gene	scores	log2FC	pvals	FDR
Homo_sapiens_LYST	7.06145	1.01777	1.64772e-12	6.0216e-08
Homo_sapiens_CBLB	6.6933	0.817328	2.18189e-11	3.98686e-07
Homo_sapiens_DGKH	6.45969	1.24213	1.04917e-10	1.27807e-06
Homo_sapiens_OSBPL3	6.19878	1.10658	5.6901e-10	5.19862e-06
Homo_sapiens_FUT8	6.09584	0.881435	1.08864e-09	7.95689e-06
Homo_sapiens_ATXN1	6.04426	0.768666	1.50097e-09	9.14216e-06
Homo_sapiens_FAM3C	5.77927	1.59978	7.50252e-09	3.91685e-05
Homo_sapiens_MYO1E	5.52481	1.5905	3.29839e-08	0.000150675
Homo_sapiens_ATP8B4	5.44981	1.10254	5.04247e-08	0.000204752
Homo_sapiens_UBASH3B	5.42337	1.03136	5.84851e-08	0.000213734
Homo_sapiens_LINC00299	5.4021	1.57313	6.58669e-08	0.000218828
Homo_sapiens_MCTP2	5.31269	0.897073	1.08018e-07	0.000328961
Homo_sapiens_TOX	5.22694	0.868575	1.72339e-07	0.00048447
Homo_sapiens_SFMBT2	5.00579	0.691237	5.56326e-07	0.00145221
Homo_sapiens_RAB27A	4.91467	0.868784	8.89327e-07	0.0021667
Homo_sapiens_MEF2A	4.86803	0.989376	1.12715e-06	0.00257448
Homo_sapiens_SETBP1	4.82956	1.04374	1.36833e-06	0.00294151
Homo_sapiens_RBPJ	4.76014	0.940723	1.93454e-06	0.00392765
Homo_sapiens_SIPA1L1	4.7062	0.692641	2.52375e-06	0.00485423
Homo_sapiens_PAM	4.64646	0.720101	3.37687e-06	0.00617039
Homo_sapiens_KLRC1	4.46528	1.37184	7.99633e-06	0.0139155
Homo_sapiens_JARID2	4.42122	0.714918	9.8143e-06	0.0163029
Homo_sapiens_ZSWIM6	4.27874	0.989467	1.87957e-05	0.0286204
Homo_sapiens_RIN3	4.23339	0.794765	2.30196e-05	0.0329171
Homo_sapiens_TRAF5	4.22952	0.862823	2.3419e-05	0.0329171
Homo_sapiens_MAP4K3	4.15903	1.01318	3.19604e-05	0.041714
Homo_sapiens_GPD2	4.14828	1.29319	3.34978e-05	0.042213

## Sheet: CD4T_naive
Gene	scores	log2FC	pvals	FDR
Homo_sapiens_IL7R	8.83018	3.73818	1.04506e-18	3.81919e-14
Homo_sapiens_ANK3	7.8976	2.66064	2.84328e-15	5.19538e-11
Homo_sapiens_LEF1	6.97235	4.54692	3.11681e-12	2.84759e-08
Homo_sapiens_ZBTB16	6.79091	2.53418	1.1143e-11	8.14444e-08
Homo_sapiens_RBMS1	6.48738	1.84063	8.73392e-11	4.55973e-07
Homo_sapiens_AKT3	6.41801	2.35433	1.38069e-10	6.30717e-07
Homo_sapiens_SERINC5	6.32562	1.97164	2.52223e-10	1.02416e-06
Homo_sapiens_IKZF1	6.05211	1.17252	1.42958e-09	4.35368e-06
Homo_sapiens_RIPOR2	5.95939	1.64366	2.53184e-09	6.609e-06
Homo_sapiens_FOXP1	5.75459	1.40457	8.68504e-09	1.98372e-05
Homo_sapiens_TTC39C	5.61451	2.2432	1.97124e-08	4.00217e-05
Homo_sapiens_SORL1	5.38403	2.30227	7.28368e-08	0.000140096
Homo_sapiens_CAMK4	5.29297	1.33167	1.20344e-07	0.000209428
Homo_sapiens_INPP4B	5.09885	1.22269	3.41722e-07	0.000567646
Homo_sapiens_TC2N	5.08551	1.34401	3.66641e-07	0.000582561
Homo_sapiens_ENSG00000249806	5.06316	3.45264	4.12359e-07	0.000612355
Homo_sapiens_CASK	5.06016	1.36893	4.18905e-07	0.000612355
Homo_sapiens_TXNIP	4.87838	2.02214	1.06961e-06	0.00144773
Homo_sapiens_CDC14A	4.83469	1.71453	1.33356e-06	0.00168052
Homo_sapiens_ZBTB20	4.77598	1.24278	1.78832e-06	0.00216125
Homo_sapiens_PDE3B	4.77098	1.00007	1.83332e-06	0.00216125
Homo_sapiens_MGAT5	4.76398	1.36986	1.89816e-06	0.00216776
Homo_sapiens_RASGRF2	4.72929	2.24042	2.2531e-06	0.00249514
Homo_sapiens_PATJ	4.69627	2.62048	2.6496e-06	0.00283048
Homo_sapiens_NCK2	4.6916	1.23242	2.71081e-06	0.00283048
Homo_sapiens_TXK	4.43777	1.84966	9.08951e-06	0.00820829
Homo_sapiens_IMMP2L	4.4311	1.78748	9.37534e-06	0.00820829
Homo_sapiens_ARHGAP15	4.42977	0.730819	9.43352e-06	0.00820829
Homo_sapiens_BACH2	4.42176	1.96336	9.78996e-06	0.00832032
Homo_sapiens_MGAT4A	4.41376	2.30062	1.01592e-05	0.00843793
Homo_sapiens_GNAQ	4.39808	4.70695	1.09213e-05	0.00867648
Homo_sapiens_PLCL2	4.38007	1.24728	1.18642e-05	0.00922504
Homo_sapiens_MAML2	4.37507	1.34172	1.21396e-05	0.00924254
Homo_sapiens_FKBP5	4.2143	0.801159	2.50556e-05	0.0183131
Homo_sapiens_SFMBT1	4.1716	1.65944	3.02461e-05	0.0212566
Homo_sapiens_PRMT2	4.09289	1.81477	4.26031e-05	0.0288321
Homo_sapiens_SYNE2	4.04553	0.984788	5.22057e-05	0.0346883
Homo_sapiens_DGKA	3.97782	1.86302	6.95507e-05	0.0436272
Homo_sapiens_CCND3	3.97482	0.846766	7.04338e-05	0.0436272
Homo_sapiens_THEM4	3.95747	2.98272	7.57474e-05	0.0461364

## Sheet: CD4T_effector
Gene	scores	log2FC	pvals	FDR
Homo_sapiens_ABLIM1	5.69833	2.16542	1.20987e-08	0.000366931
Homo_sapiens_CSGALNACT1	5.6113	2.25009	2.0081e-08	0.000366931
Homo_sapiens_KAT2B	5.191	1.09167	2.09166e-07	0.00254799
Homo_sapiens_ANTXR2	4.8942	1.2863	9.87064e-07	0.00901806

## Sheet: CD8T_naive
Gene	scores	log2FC	pvals	FDR
Homo_sapiens_TC2N	5.83537	1.45514	5.36721e-09	8.06136e-05
Homo_sapiens_AOAH	5.80035	1.24145	6.61762e-09	8.06136e-05
Homo_sapiens_SYNE2	4.24095	0.892391	2.22572e-05	0.0445343

## Sheet: Prolif
Gene	scores	log2FC	pvals	FDR
Homo_sapiens_RRM2	9.40308	5.72172	5.29875e-21	1.93643e-16
Homo_sapiens_DIAPH3	8.70038	5.22446	3.30786e-18	6.04429e-14
Homo_sapiens_CENPP	8.25154	3.79812	1.56364e-16	1.68344e-12
Homo_sapiens_EZH2	8.2319	2.88178	1.84259e-16	1.68344e-12
Homo_sapiens_ATAD2	7.9356	3.55529	2.09473e-15	1.53104e-11
Homo_sapiens_ASPM	7.68874	4.79812	1.48585e-14	9.05007e-11
Homo_sapiens_MELK	7.16136	4.37396	7.98779e-13	4.17019e-09
Homo_sapiens_KNL1	6.79002	4.79764	1.12115e-11	5.12154e-08
Homo_sapiens_NSD2	6.74339	2.39688	1.54736e-11	6.28313e-08
Homo_sapiens_LINC01572	6.45129	2.83372	1.10899e-10	4.0528e-07
Homo_sapiens_FANCI	6.43516	4.23738	1.2334e-10	4.09768e-07
Homo_sapiens_BRIP1	6.34961	3.19327	2.15868e-10	6.57408e-07
Homo_sapiens_TMPO	6.23003	2.61996	4.66337e-10	1.31094e-06
Homo_sapiens_POLQ	5.69459	4.64662	1.2367e-08	3.22824e-05
Homo_sapiens_NUSAP1	5.61183	4.36242	2.00194e-08	4.87739e-05
Homo_sapiens_DLEU2	5.595	1.81314	2.20619e-08	5.03907e-05
Homo_sapiens_MKI67	5.5382	3.42869	3.05602e-08	6.56954e-05
Homo_sapiens_CDK5RAP2	5.49507	1.78405	3.90563e-08	7.92951e-05
Homo_sapiens_NCAPD3	5.42669	2.98608	5.74089e-08	0.000110421
Homo_sapiens_DEPDC1B	5.41231	4.40856	6.22159e-08	0.000113684
Homo_sapiens_BARD1	5.35936	2.47693	8.35153e-08	0.000145336
Homo_sapiens_HELLS	5.18123	3.01978	2.20424e-07	0.000350234
Homo_sapiens_BRCA2	5.11461	3.28269	3.14391e-07	0.000469932
Homo_sapiens_KIF15	5.1104	3.81869	3.21475e-07	0.000469932
Homo_sapiens_TACC3	5.10199	3.00736	3.36108e-07	0.000472426
Homo_sapiens_CNTRL	5.03992	1.6605	4.65726e-07	0.000630368
Homo_sapiens_NCAPG	4.96593	5.72428	6.83716e-07	0.000892372
Homo_sapiens_CENPF	4.95892	3.45831	7.08862e-07	0.000893289
Homo_sapiens_SCMH1	4.9491	2.23432	7.45568e-07	0.000908227
Homo_sapiens_NCAPG2	4.92806	3.09239	8.30491e-07	0.000975744
Homo_sapiens_KIF11	4.91859	4.03647	8.71677e-07	0.000975744
Homo_sapiens_PARPBP	4.91649	3.90602	8.81093e-07	0.000975744
Homo_sapiens_FANCA	4.839	2.55049	1.30496e-06	0.00140264
Homo_sapiens_ARHGAP11B	4.79446	3.74099	1.6311e-06	0.0017031
Homo_sapiens_LMNB1	4.76536	2.57195	1.88517e-06	0.00191371
Homo_sapiens_CIP2A	4.74818	3.44381	2.05257e-06	0.00202733
Homo_sapiens_TOP2A	4.70154	4.08787	2.58205e-06	0.00248319
Homo_sapiens_ATAD5	4.69137	3.13378	2.71379e-06	0.00254296
Homo_sapiens_PRIM2	4.64684	1.78766	3.37059e-06	0.0029378
Homo_sapiens_CENPU	4.64649	4.88581	3.37632e-06	0.0029378
Homo_sapiens_MIS18BP1	4.63352	2.03779	3.59509e-06	0.00305245
Homo_sapiens_STAG1	4.62896	1.10932	3.67513e-06	0.00305245
Homo_sapiens_ENSG00000290886	4.61809	2.64427	3.87296e-06	0.00314527
Homo_sapiens_CEP128	4.5732	1.6294	4.80325e-06	0.00381597
Homo_sapiens_CIT	4.56619	3.58387	4.9667e-06	0.00386187
Homo_sapiens_DTL	4.55777	3.4662	5.16986e-06	0.0039361
Homo_sapiens_FANCD2	4.53814	3.49463	5.67533e-06	0.00423275
Homo_sapiens_STIL	4.51885	4.22531	6.2176e-06	0.00454444
Homo_sapiens_BUB1B	4.42312	3.52877	9.7284e-06	0.00697107
Homo_sapiens_RBL1	4.41296	2.18226	1.01969e-05	0.00716629
Homo_sapiens_ANLN	4.40068	4.5665	1.07911e-05	0.00744078
Homo_sapiens_CEP192	4.37824	1.5474	1.19641e-05	0.00809685
Homo_sapiens_NEIL3	4.36211	4.50094	1.28814e-05	0.0085591
Homo_sapiens_NUP210	4.28462	1.73379	1.83055e-05	0.011946
Homo_sapiens_DEK	4.27725	1.93248	1.89214e-05	0.0121313
Homo_sapiens_RFWD3	4.25691	2.97128	2.07267e-05	0.0130003
Homo_sapiens_ANKRD36C	4.25411	1.49806	2.09883e-05	0.0130003
Homo_sapiens_KIF18B	4.23623	5.31149	2.27308e-05	0.0138449
Homo_sapiens_RFC3	4.15803	3.59677	3.21003e-05	0.0188796
Homo_sapiens_CENPI	4.15593	4.70474	3.23971e-05	0.0188796
Homo_sapiens_KNTC1	4.15487	2.39758	3.25466e-05	0.0188796
Homo_sapiens_WWOX	4.144	1.75242	3.41293e-05	0.0194884
Homo_sapiens_CEP295	4.13138	1.98447	3.6059e-05	0.0201806
Homo_sapiens_KIF14	4.12893	4.36352	3.64461e-05	0.0201806
Homo_sapiens_DCLRE1C	4.11034	1.81035	3.95073e-05	0.0215492
Homo_sapiens_CKAP5	4.09526	2.17898	4.21687e-05	0.0226626
Homo_sapiens_MPHOSPH9	4.08264	1.87813	4.45269e-05	0.0235831
Homo_sapiens_TPX2	4.05459	3.97736	5.02226e-05	0.0262198
Homo_sapiens_FAM111A	4.03916	1.93487	5.3643e-05	0.027611
Homo_sapiens_CENPK	4.0339	2.08368	5.48587e-05	0.0278446
Homo_sapiens_WDR76	4.01637	3.15651	5.91021e-05	0.0295875
Homo_sapiens_E2F7	3.97359	4.5479	7.0798e-05	0.0349637
Homo_sapiens_MMS22L	3.94904	2.04653	7.84645e-05	0.0377301
Homo_sapiens_CENPE	3.94133	3.75544	8.10318e-05	0.0384585
Homo_sapiens_GTSE1	3.90626	4.42893	9.37346e-05	0.0439171
Homo_sapiens_SKA2	3.89785	2.19884	9.70517e-05	0.0447211
Homo_sapiens_KIF4A	3.89574	4.15034	9.78981e-05	0.0447211
Homo_sapiens_SLFN12L	3.88522	0.889629	0.000102236	0.046126
Homo_sapiens_SMC4	3.86629	1.76057	0.000110504	0.0492485
Homo_sapiens_ENSG00000224905	3.86068	3.39118	0.000113073	0.0497861
