# Supplementary material for: Integrated Molecular Profiling of Preclinical and Clinical Cardiac Xenotransplants
Source: Research Square preprint supplement (doi:10.21203/rs.3.rs-8406985/v1), 2026-02-04
Supplement: Supplementary file 17 [file 728ea762a0bab42c6796d4df.xlsx]

## Sheet: MO_CD16_sus
Gene	scores	log2FC	pvals	FDR
Sus_scrofa___TCF7L2	18.7205	4.32988	3.36954e-78	1.81369e-73
Sus_scrofa___TBXAS1	18.3354	4.72511	4.31706e-75	1.16185e-70
Sus_scrofa___DOCK4	15.3518	1.96031	3.44482e-53	4.63553e-49
Sus_scrofa___GRK5	14.4521	3.38462	2.43276e-47	1.63682e-43
Sus_scrofa___TNS3	14.2591	2.20081	3.9347e-46	2.35321e-42
Sus_scrofa___KIT	14.1197	6.05302	2.87289e-45	1.40579e-41
Sus_scrofa___TRIO	13.5789	2.51149	5.34447e-42	2.39726e-38
Sus_scrofa___HPGD	13.4957	4.75793	1.65772e-41	6.37348e-38
Sus_scrofa___PRKCB	12.8289	1.78466	1.12984e-37	3.80092e-34
Sus_scrofa___THRB	12.8176	2.68374	1.30618e-37	4.13568e-34
Sus_scrofa___NFKBIZ	12.5301	3.63973	5.10727e-36	1.52725e-32
Sus_scrofa___CAMK2D	12.2063	3.04543	2.876e-34	7.74019e-31
Sus_scrofa___PLPP1	12.018	4.04827	2.85953e-33	7.3294e-30
Sus_scrofa___ITGAL	11.8976	2.84471	1.21813e-32	2.85073e-29
Sus_scrofa___SLC8A1	11.6787	2.12232	1.63828e-31	3.67425e-28
Sus_scrofa___DOCK2	11.4387	1.6639	2.68011e-30	5.54844e-27
Sus_scrofa___NFAT5	10.6476	3.08744	1.78952e-26	3.44011e-23
Sus_scrofa___UST	10.5825	2.30685	3.59207e-26	6.66712e-23
Sus_scrofa___ADGRE5	10.558	2.71921	4.66612e-26	8.37195e-23
Sus_scrofa___SIPA1L1	10.3493	2.49622	4.21739e-25	6.67663e-22
Sus_scrofa___ENSSSCG00000005959	10.0223	1.5955	1.21683e-23	1.77019e-20
Sus_scrofa___PLEKHA5	9.99242	5.62467	1.64509e-23	2.33023e-20
Sus_scrofa___TMTC1	9.77622	4.4667	1.42424e-22	1.91653e-19
Sus_scrofa___HIPK2	9.67609	2.6367	3.81022e-22	5.00216e-19
Sus_scrofa___RASGEF1B	9.64604	2.54747	5.10921e-22	6.54782e-19
Sus_scrofa___ADAM10	9.59216	2.42225	8.62558e-22	1.05518e-18
Sus_scrofa___LPAR1	9.55472	5.49463	1.23921e-21	1.48226e-18
Sus_scrofa___ENSSSCG00000026996	9.45165	3.09625	3.33517e-21	3.90258e-18
Sus_scrofa___JARID2	9.43636	1.62125	3.85962e-21	4.42017e-18
Sus_scrofa___RASGRP3	9.41989	3.10258	4.51556e-21	5.06363e-18
Sus_scrofa___SBF2	9.15488	1.2829	5.44197e-20	5.85839e-17
Sus_scrofa___PTPRJ	9.1265	1.26086	7.07502e-20	7.46706e-17
Sus_scrofa___MTSS1	9.02611	1.19053	1.77882e-19	1.84128e-16
Sus_scrofa___ENSSSCG00000008576	8.97934	2.33896	2.72388e-19	2.76633e-16
Sus_scrofa___PLVAP	8.9727	4.29227	2.89338e-19	2.88406e-16
Sus_scrofa___LYN	8.84234	2.16685	9.37316e-19	9.00928e-16
Sus_scrofa___TRERF1	8.82721	1.99267	1.07315e-18	1.01339e-15
Sus_scrofa___ENSSSCG00000013788	8.82391	4.27749	1.10529e-18	1.02574e-15
Sus_scrofa___EXT1	8.76097	1.24888	1.93576e-18	1.766e-15
Sus_scrofa___RAPGEF2	8.75253	2.71744	2.08624e-18	1.87157e-15
Sus_scrofa___SYNE2	8.68812	2.45275	3.68472e-18	3.19893e-15
Sus_scrofa___ARL15	8.62761	1.58404	6.26488e-18	5.35259e-15
Sus_scrofa___ENSSSCG00000026210	8.52091	5.17181	1.58308e-17	1.33142e-14
Sus_scrofa___PAG1	8.45458	2.19846	2.80091e-17	2.28427e-14
Sus_scrofa___ADGRG1	8.4048	2.83186	4.28574e-17	3.39241e-14
Sus_scrofa___RNF149	8.33208	2.45299	7.94318e-17	6.02182e-14
Sus_scrofa___PRR5L	8.22087	2.80306	2.02031e-16	1.4886e-13
Sus_scrofa___ALOX5	8.21932	2.42845	2.04653e-16	1.4886e-13
Sus_scrofa___ENSSSCG00000027677	8.09227	3.79157	5.85623e-16	4.09374e-13
Sus_scrofa___CHST15	7.98812	2.78467	1.37011e-15	9.33511e-13
Sus_scrofa___RASA1	7.9602	1.7764	1.71757e-15	1.15563e-12
Sus_scrofa___TMCC3	7.91527	4.53811	2.46708e-15	1.63942e-12
Sus_scrofa___PARP8	7.83165	1.93026	4.81526e-15	3.12272e-12
Sus_scrofa___TNIK	7.74451	2.29606	9.59546e-15	6.07629e-12
Sus_scrofa___TP53I11	7.49337	4.94685	6.71289e-14	4.01476e-11
Sus_scrofa___MYO9B	7.4815	1.33874	7.34805e-14	4.34633e-11
Sus_scrofa___ENSSSCG00000013785	7.40004	9.16462	1.36142e-13	7.87955e-11
Sus_scrofa___ENSSSCG00000003236	7.36142	2.96903	1.81959e-13	1.01668e-10
Sus_scrofa___IRAG2	7.3605	1.97359	1.83216e-13	1.01668e-10
Sus_scrofa___ENSSSCG00000040016	7.33234	1.54776	2.26176e-13	1.24226e-10
Sus_scrofa___ENSSSCG00000000530	7.22384	1.40962	5.05401e-13	2.74785e-10
Sus_scrofa___RIPOR2	7.15684	1.64254	8.25557e-13	4.31422e-10
Sus_scrofa___ENSSSCG00000006156	7.12324	2.07452	1.05418e-12	5.45598e-10
Sus_scrofa___ENSSSCG00000020967	7.05926	1.84818	1.67397e-12	8.50031e-10
Sus_scrofa___NF1	7.01658	1.34838	2.27358e-12	1.14372e-09
Sus_scrofa___ITPR2	6.98453	1.18961	2.85815e-12	1.42447e-09
Sus_scrofa___FRMD3	6.88911	3.39774	5.61413e-12	2.74715e-09
Sus_scrofa___ENSSSCG00000015645	6.85873	0.868823	6.94759e-12	3.36902e-09
Sus_scrofa___ENSSSCG00000035037	6.85179	4.92571	7.2931e-12	3.50498e-09
Sus_scrofa___ZEB2	6.84243	0.815767	7.78613e-12	3.70882e-09
Sus_scrofa___EHD1	6.8008	3.87981	1.04038e-11	4.86951e-09
Sus_scrofa___ENSSSCG00000001229	6.79044	1.0618	1.11794e-11	5.18742e-09
Sus_scrofa___MAP3K1	6.76348	1.64232	1.34715e-11	6.19758e-09
Sus_scrofa___C20orf194	6.70668	1.91673	1.99098e-11	9.08189e-09
Sus_scrofa___RAP1B	6.69289	1.39178	2.18804e-11	9.89691e-09
Sus_scrofa___WSB1	6.66564	1.38243	2.63511e-11	1.1626e-08
Sus_scrofa___MYOF	6.66267	2.17887	2.68889e-11	1.17668e-08
Sus_scrofa___CD200R1	6.46695	2.27014	9.99978e-11	4.23817e-08
Sus_scrofa___ADGRG3	6.41872	6.31551	1.37421e-10	5.73397e-08
Sus_scrofa___ARHGAP17	6.38466	0.961417	1.71776e-10	7.11231e-08
Sus_scrofa___KYNU	6.35528	1.42023	2.08045e-10	8.54828e-08
Sus_scrofa___RCSD1	6.31119	1.02377	2.769e-10	1.10403e-07
Sus_scrofa___DIAPH2	6.27215	0.780578	3.56088e-10	1.39903e-07
Sus_scrofa___CD38	6.05942	2.39068	1.3661e-09	5.03642e-07
Sus_scrofa___CYRIA	6.02202	2.24951	1.72255e-09	6.30736e-07
Sus_scrofa___CCL21	5.97383	4.93381	2.31747e-09	8.37397e-07
Sus_scrofa___SH3KBP1	5.97379	1.2268	2.31807e-09	8.37397e-07
Sus_scrofa___CSNK1G3	5.94708	1.69099	2.72965e-09	9.79506e-07
Sus_scrofa___RGS18	5.93107	2.65051	3.00958e-09	1.0728e-06
Sus_scrofa___ACER3	5.92836	1.79931	3.05978e-09	1.08352e-06
Sus_scrofa___TIAM1	5.90621	2.30175	3.50072e-09	1.22357e-06
Sus_scrofa___FYB1	5.88109	1.27393	4.07574e-09	1.41536e-06
Sus_scrofa___CTNND1	5.80686	1.73883	6.36538e-09	2.1685e-06
Sus_scrofa___SIK3	5.69632	1.54369	1.22421e-08	4.05054e-06
Sus_scrofa___SYK	5.69599	1.03199	1.22661e-08	4.05054e-06
Sus_scrofa___ARHGEF2	5.68441	1.91756	1.31266e-08	4.29473e-06
Sus_scrofa___ST3GAL1	5.68391	2.43908	1.31652e-08	4.29473e-06
Sus_scrofa___ASAP1	5.64483	0.795427	1.65345e-08	5.32925e-06
Sus_scrofa___APBA1	5.53926	4.08012	3.03755e-08	9.67449e-06
Sus_scrofa___LIN7A	5.53637	4.74815	3.08796e-08	9.77721e-06

## Sheet: CD8T_cytox_2_sus
Gene	scores	log2FC	pvals	FDR
Sus_scrofa___PTPRC	10.0827	2.80298	6.59005e-24	3.54716e-19
Sus_scrofa___RIPOR2	9.17355	3.62909	4.57673e-20	1.23174e-15
Sus_scrofa___TSPAN5	8.61638	4.08453	6.91006e-18	9.29853e-14
Sus_scrofa___SKAP1	8.58631	3.59871	8.981e-18	9.66823e-14
Sus_scrofa___NCALD	8.55312	3.83295	1.19799e-17	1.07472e-13
Sus_scrofa___PRKCB	8.32443	2.17857	8.47366e-17	6.51576e-13
Sus_scrofa___ITGAL	8.2821	3.54064	1.21022e-16	8.14265e-13
Sus_scrofa___FYN	8.04728	3.47052	8.46555e-16	4.14243e-12
Sus_scrofa___CHST11	7.9175	3.09343	2.42329e-15	1.08697e-11
Sus_scrofa___RORA	7.78656	2.92198	6.88564e-15	2.85097e-11
Sus_scrofa___PPP1R16B	7.7223	3.92228	1.14253e-14	4.39271e-11
Sus_scrofa___ENSSSCG00000013568	7.65717	3.03261	1.90068e-14	6.39412e-11
Sus_scrofa___ENSSSCG00000005095	7.5153	3.46049	5.67784e-14	1.52808e-10
Sus_scrofa___ITGA4	7.23056	3.09614	4.81016e-13	1.0788e-09
Sus_scrofa___PREX1	7.2149	1.99605	5.39746e-13	1.08834e-09
Sus_scrofa___IKZF1	7.21335	2.45338	5.45931e-13	1.08834e-09
Sus_scrofa___ETS1	7.02395	3.297	2.15675e-12	4.14604e-09
Sus_scrofa___OSBPL8	7.00628	2.81308	2.4474e-12	4.39112e-09
Sus_scrofa___UTRN	6.99636	2.2079	2.62706e-12	4.48783e-09
Sus_scrofa___CD3E	6.98899	4.25142	2.7687e-12	4.516e-09
Sus_scrofa___ARHGEF3	6.89224	3.338	5.49205e-12	8.44614e-09
Sus_scrofa___CCND3	6.65044	2.1336	2.92215e-11	4.25102e-08
Sus_scrofa___SUSD1	6.41717	3.2273	1.38831e-10	1.6606e-07
Sus_scrofa___RALGAPA2	6.33569	2.63357	2.36279e-10	2.76477e-07
Sus_scrofa___ST8SIA1	6.28313	3.03757	3.31823e-10	3.80015e-07
Sus_scrofa___ENSSSCG00000028092	6.13839	2.30613	8.3361e-10	9.3479e-07
Sus_scrofa___DOCK5	6.10513	3.774	1.02715e-09	1.12831e-06
Sus_scrofa___LCP1	6.08226	1.9218	1.18497e-09	1.27565e-06
Sus_scrofa___SFMBT2	6.03699	2.72115	1.57016e-09	1.65716e-06
Sus_scrofa___ARAP2	6.02916	3.36013	1.64814e-09	1.70602e-06
Sus_scrofa___MYCBP2	5.95915	1.8317	2.53545e-09	2.52728e-06
Sus_scrofa___TRERF1	5.93644	2.7475	2.91277e-09	2.85059e-06
Sus_scrofa___NFATC2	5.81814	2.74772	5.95067e-09	5.71966e-06
Sus_scrofa___RAP1B	5.80775	2.018	6.3318e-09	5.87613e-06
Sus_scrofa___IMMP2L	5.79124	2.35141	6.98699e-09	6.37426e-06
Sus_scrofa___CARD11	5.77829	3.14978	7.54634e-09	6.65884e-06
Sus_scrofa___ENSSSCG00000014909	5.75154	3.42885	8.84318e-09	7.55544e-06
Sus_scrofa___CD226	5.72759	3.4728	1.01868e-08	8.56739e-06
Sus_scrofa___BIN2	5.37547	2.16061	7.63819e-08	5.40965e-05
Sus_scrofa___STK10	5.37299	1.71547	7.74407e-08	5.4134e-05
Sus_scrofa___STIM1	5.36067	2.2596	8.29158e-08	5.72183e-05
Sus_scrofa___TNIK	5.34935	2.97018	8.8272e-08	6.01434e-05
Sus_scrofa___NLRC5	5.31074	2.19699	1.09181e-07	7.34597e-05
Sus_scrofa___ADGRG1	5.15856	3.20218	2.48857e-07	0.000159464
Sus_scrofa___SYTL3	5.12491	3.53376	2.97674e-07	0.000186309
Sus_scrofa___BCL11B	5.07344	3.4898	3.90693e-07	0.000236286
Sus_scrofa___ZNF205	5.06297	3.4827	4.12771e-07	0.000246865
Sus_scrofa___IQGAP2	4.97025	1.28244	6.68658e-07	0.000387002
Sus_scrofa___CD8A	4.95979	4.43333	7.05707e-07	0.0004041
Sus_scrofa___ATXN7L1	4.948	1.61435	7.49788e-07	0.000424822
Sus_scrofa___ENSSSCG00000024973	4.94343	2.71425	7.67604e-07	0.000430386
Sus_scrofa___CD247	4.93475	3.22285	8.02551e-07	0.000440118
Sus_scrofa___RASA3	4.9311	2.06424	8.17668e-07	0.000440118
Sus_scrofa___ENSSSCG00000004081	4.92839	3.20033	8.29104e-07	0.000441855
Sus_scrofa___BTBD11	4.85203	3.17936	1.22206e-06	0.000644887
Sus_scrofa___RABGAP1L	4.79326	1.59819	1.6409e-06	0.000849258
Sus_scrofa___TBX21	4.7652	3.72437	1.88666e-06	0.00094908
Sus_scrofa___GLCCI1	4.67062	2.68417	3.00292e-06	0.00145617
Sus_scrofa___RUNX1	4.63612	0.965377	3.55007e-06	0.00166162
Sus_scrofa___TTF2	4.61883	2.76072	3.85903e-06	0.001782
Sus_scrofa___CD2	4.61806	3.34517	3.87347e-06	0.001782
Sus_scrofa___ENSSSCG00000039706	4.60752	2.9423	4.0751e-06	0.00184324
Sus_scrofa___CCDC88C	4.5886	3.3253	4.4623e-06	0.00200157
Sus_scrofa___FOXN3	4.54798	1.2401	5.41642e-06	0.00238341
Sus_scrofa___DIAPH1	4.54503	2.12966	5.49273e-06	0.00238429
Sus_scrofa___PARP8	4.52487	2.23224	6.04315e-06	0.00258158
Sus_scrofa___ARHGAP15	4.46882	1.30827	7.86509e-06	0.00320717
Sus_scrofa___CD6	4.44929	4.3536	8.61556e-06	0.00346075
Sus_scrofa___ANKRD44	4.39572	1.17026	1.10407e-05	0.00433779
Sus_scrofa___GRK5	4.38882	2.17309	1.13968e-05	0.00444525
Sus_scrofa___RASGRP1	4.38285	3.29384	1.17137e-05	0.00453599
Sus_scrofa___TNFAIP8	4.35401	1.46828	1.3367e-05	0.00510277
Sus_scrofa___ADGRG5	4.34905	3.85387	1.3673e-05	0.00518282
Sus_scrofa___SMCHD1	4.34013	1.35254	1.42396e-05	0.00535988
Sus_scrofa___IL12RB2	4.26168	3.47335	2.02897e-05	0.00732964
Sus_scrofa___PDE4D	4.24625	1.23286	2.17377e-05	0.00780037
Sus_scrofa___PPP3CA	4.22726	1.23922	2.36557e-05	0.00832217
Sus_scrofa___CD38	4.19237	3.02737	2.76054e-05	0.00961919
Sus_scrofa___DOCK10	4.1916	1.01758	2.76999e-05	0.00961919
Sus_scrofa___STK39	4.17322	2.8979	3.00321e-05	0.0103622
Sus_scrofa___RAP1GAP2	4.17043	2.61247	3.04023e-05	0.0103854
Sus_scrofa___REV1	4.16694	1.62195	3.08711e-05	0.0104508
Sus_scrofa___PRRC2B	4.11454	1.58171	3.87958e-05	0.0129703
Sus_scrofa___ST3GAL5	4.09833	2.00331	4.16134e-05	0.0138265
Sus_scrofa___DOCK2	4.02686	1.14183	5.65275e-05	0.0182195
Sus_scrofa___SSBP3	4.0212	2.19172	5.79031e-05	0.018442
Sus_scrofa___FER	4.01585	2.93429	5.92324e-05	0.0186877
Sus_scrofa___CAMK4	3.99189	2.8761	6.5548e-05	0.0201611
Sus_scrofa___CD5	3.97515	4.26957	7.03356e-05	0.021269
Sus_scrofa___FMNL1	3.9577	2.04798	7.56735e-05	0.0227553
Sus_scrofa___PTPRE	3.94786	1.6087	7.88532e-05	0.0234495
Sus_scrofa___TTN	3.9398	1.25647	8.15508e-05	0.0241184
Sus_scrofa___CEMIP2	3.9032	1.8444	9.49273e-05	0.0273238
Sus_scrofa___ITK	3.87685	3.24864	0.000105819	0.0302969
Sus_scrofa___RDX	3.87506	2.21695	0.000106597	0.0303581
Sus_scrofa___MBNL1	3.85677	1.39183	0.000114896	0.0322105
Sus_scrofa___PTGER2	3.82894	3.66901	0.000128698	0.0357078
Sus_scrofa___NEDD9	3.8177	2.18911	0.000134704	0.036805
Sus_scrofa___NLRC3	3.80537	3.03037	0.000141593	0.0381069
Sus_scrofa___THSD7B	3.76389	3.50486	0.000167288	0.044357

## Sheet: CD8T_cytox_1_sus
Gene	scores	log2FC	pvals	FDR
Sus_scrofa___PTPRC	16.716	2.68996	1.00177e-62	5.39212e-58
Sus_scrofa___SKAP1	15.7397	4.13651	8.08017e-56	1.44974e-51
Sus_scrofa___CHST11	14.7497	3.3239	3.09065e-49	4.15893e-45
Sus_scrofa___RIPOR2	13.101	3.12231	3.24995e-39	1.24951e-35
Sus_scrofa___FYN	12.9413	3.30963	2.63015e-38	9.43804e-35
Sus_scrofa___MYCBP2	12.7067	2.04654	5.43022e-37	1.71934e-33
Sus_scrofa___ENSSSCG00000005095	12.6863	3.49099	7.04461e-37	2.10657e-33
Sus_scrofa___ARHGAP15	12.6565	2.06007	1.02965e-36	2.91695e-33
Sus_scrofa___ENSSSCG00000013568	12.4984	2.79606	7.61602e-36	1.9521e-32
Sus_scrofa___RORA	12.3833	2.93043	3.22009e-35	7.87839e-32
Sus_scrofa___TSPAN5	11.6204	3.70235	3.24425e-31	6.71634e-28
Sus_scrofa___PREX1	11.5366	1.7531	8.62585e-31	1.71961e-27
Sus_scrofa___ITGA4	11.4514	3.13704	2.31371e-30	4.44779e-27
Sus_scrofa___NCALD	11.4172	3.20801	3.43195e-30	6.36994e-27
Sus_scrofa___SFMBT2	11.1833	3.16177	4.92493e-29	8.03301e-26
Sus_scrofa___ETS1	11.0558	3.34632	2.05602e-28	3.07409e-25
Sus_scrofa___ARHGEF3	10.648	3.1982	1.78195e-26	2.23059e-23
Sus_scrofa___IKZF1	10.6016	2.21338	2.92986e-26	3.51941e-23
Sus_scrofa___PRKCB	10.3406	1.59104	4.61528e-25	5.28557e-22
Sus_scrofa___BTBD11	10.1521	3.63747	3.24221e-24	3.42186e-21
Sus_scrofa___ANKRD44	10.145	1.64024	3.48686e-24	3.6093e-21
Sus_scrofa___UTRN	10.0878	1.97577	6.25403e-24	6.23388e-21
Sus_scrofa___ENSSSCG00000001229	10.0248	1.78849	1.18651e-23	1.14045e-20
Sus_scrofa___PPP1R16B	9.97827	3.50902	1.89742e-23	1.79176e-20
Sus_scrofa___ARAP2	9.88499	3.40255	4.8361e-23	4.48806e-20
Sus_scrofa___BCL11B	9.85844	3.97399	6.30182e-23	5.74919e-20
Sus_scrofa___ITGAL	9.81394	2.82754	9.8059e-23	8.65267e-20
Sus_scrofa___ENSSSCG00000004081	9.66373	3.5894	4.29922e-22	3.61578e-19
Sus_scrofa___ENSSSCG00000028092	9.37702	2.17734	6.78667e-21	5.21856e-18
Sus_scrofa___CD247	9.2945	3.7291	1.47902e-20	1.10569e-17
Sus_scrofa___IMMP2L	9.21507	2.16721	3.11079e-20	2.29371e-17
Sus_scrofa___ENSSSCG00000024973	9.15037	2.89702	5.67391e-20	4.12708e-17
Sus_scrofa___CD3E	9.14098	4.29244	6.18914e-20	4.44182e-17
Sus_scrofa___PARP8	8.8745	2.62864	7.02451e-19	4.84745e-16
Sus_scrofa___IKZF3	8.85986	3.1814	8.01129e-19	5.45843e-16
Sus_scrofa___NLRC3	8.85073	3.76863	8.69459e-19	5.84994e-16
Sus_scrofa___STK10	8.6524	1.69079	5.04266e-18	3.2702e-15
Sus_scrofa___BIN2	8.60292	2.16689	7.77142e-18	4.92123e-15
Sus_scrofa___STIM1	8.51185	2.23317	1.71186e-17	1.07143e-14
Sus_scrofa___CD226	8.42853	3.56298	3.5002e-17	2.11687e-14
Sus_scrofa___CCND3	8.39815	1.70482	4.53575e-17	2.68287e-14
Sus_scrofa___SUSD1	8.38443	3.0665	5.09713e-17	2.98215e-14
Sus_scrofa___PRKCQ	8.35087	3.76623	6.77623e-17	3.92191e-14
Sus_scrofa___RABGAP1L	8.20061	1.56121	2.3917e-16	1.317e-13
Sus_scrofa___LCP1	8.1147	1.53826	4.86996e-16	2.6213e-13
Sus_scrofa___TNIK	8.05741	2.60832	7.79294e-16	4.1531e-13
Sus_scrofa___TOX	8.02054	2.88976	1.05283e-15	5.44902e-13
Sus_scrofa___IQGAP2	7.85819	1.16441	3.89711e-15	1.92446e-12
Sus_scrofa___FNBP1	7.81563	1.26863	5.46867e-15	2.6593e-12
Sus_scrofa___ITK	7.81528	3.68217	5.48401e-15	2.6593e-12
Sus_scrofa___REV1	7.8032	1.98384	6.03579e-15	2.88312e-12
Sus_scrofa___CD6	7.78966	4.85676	6.71908e-15	3.17246e-12
Sus_scrofa___DOCK5	7.77784	3.39945	7.37742e-15	3.42325e-12
Sus_scrofa___CD2	7.77003	3.60322	7.84662e-15	3.60985e-12
Sus_scrofa___STK39	7.7673	3.24965	8.01782e-15	3.65735e-12
Sus_scrofa___RALGAPA2	7.75252	2.06527	9.00843e-15	4.04073e-12
Sus_scrofa___RDX	7.72483	2.70253	1.12006e-14	4.94166e-12
Sus_scrofa___TRERF1	7.67433	2.19001	1.66287e-14	7.21821e-12
Sus_scrofa___ENSSSCG00000014909	7.65263	3.51698	1.9691e-14	8.4791e-12
Sus_scrofa___ST8SIA1	7.6072	2.54334	2.8009e-14	1.17782e-11
Sus_scrofa___OSBPL8	7.41738	1.98385	1.19456e-13	4.79839e-11
Sus_scrofa___ARL15	7.18143	1.43114	6.89846e-13	2.6149e-10
Sus_scrofa___ADGRG1	7.17005	2.98593	7.4968e-13	2.82184e-10
Sus_scrofa___GRK5	7.15153	2.02133	8.58153e-13	3.20771e-10
Sus_scrofa___NOL11	7.14924	1.32917	8.72612e-13	3.23925e-10
Sus_scrofa___ENSSSCG00000039706	7.09168	3.09877	1.32491e-12	4.81854e-10
Sus_scrofa___CEMIP2	7.04141	1.96942	1.9031e-12	6.73923e-10
Sus_scrofa___RAP1B	7.00842	1.64541	2.4103e-12	8.42448e-10
Sus_scrofa___DOCK10	6.89251	1.02659	5.4815e-12	1.86739e-09
Sus_scrofa___TTN	6.87214	1.24799	6.32467e-12	2.1277e-09
Sus_scrofa___THSD7B	6.73414	3.65964	1.64903e-11	5.1605e-09
Sus_scrofa___FOXN3	6.59499	1.1025	4.25272e-11	1.29326e-08
Sus_scrofa___MSI2	6.58917	2.96187	4.42283e-11	1.33744e-08
Sus_scrofa___CARD11	6.55812	2.76711	5.44888e-11	1.6385e-08
Sus_scrofa___TBX21	6.5426	3.5487	6.04583e-11	1.78804e-08
Sus_scrofa___ZNF205	6.5228	2.97922	6.90079e-11	2.02287e-08
Sus_scrofa___PPP3CA	6.52249	1.15669	6.91501e-11	2.02287e-08
Sus_scrofa___FAM117A	6.47971	3.02996	9.18996e-11	2.65946e-08
Sus_scrofa___SYTL3	6.33377	3.16802	2.39239e-10	6.60373e-08
Sus_scrofa___TTF2	6.25633	2.60027	3.94149e-10	1.07149e-07
Sus_scrofa___JAK1	6.20349	1.306	5.5224e-10	1.47153e-07
Sus_scrofa___SNTB1	6.19172	2.26574	5.95126e-10	1.57026e-07
Sus_scrofa___STK17B	6.16931	1.66738	6.85878e-10	1.79214e-07
Sus_scrofa___DOCK2	6.11806	1.02724	9.4719e-10	2.42778e-07
Sus_scrofa___EML4	6.07026	1.32883	1.27706e-09	3.22719e-07
Sus_scrofa___HIVEP2	6.04979	2.34928	1.45032e-09	3.64791e-07
Sus_scrofa___FRYL	6.04327	1.19404	1.51026e-09	3.76348e-07
Sus_scrofa___PTPRE	6.00229	1.65094	1.9455e-09	4.78165e-07
Sus_scrofa___STK38	5.97041	1.97284	2.36662e-09	5.7381e-07
Sus_scrofa___CAMK4	5.91753	2.88725	3.26817e-09	7.85324e-07
Sus_scrofa___CD5	5.81239	4.14916	6.15887e-09	1.4351e-06
Sus_scrofa___ARHGAP30	5.80947	2.13564	6.26691e-09	1.45398e-06
Sus_scrofa___PIK3R5	5.77904	1.5613	7.51263e-09	1.72074e-06
Sus_scrofa___ZNF831	5.75823	3.32041	8.50019e-09	1.93051e-06
Sus_scrofa___RAB27A	5.7543	3.73013	8.70005e-09	1.9676e-06
Sus_scrofa___STAG1	5.74614	0.834242	9.13021e-09	2.04768e-06
Sus_scrofa___SVIL	5.74416	2.29989	9.23793e-09	2.06324e-06
Sus_scrofa___CYTH1	5.68378	1.549	1.31749e-08	2.87106e-06
Sus_scrofa___ZDHHC14	5.67077	2.92987	1.42156e-08	3.07253e-06
Sus_scrofa___PHACTR2	5.61238	1.79831	1.99564e-08	4.196e-06

## Sheet: CD4T_naive_sus
Gene	scores	log2FC	pvals	FDR
Sus_scrofa___SKAP1	12.6579	4.21212	1.01118e-36	5.44275e-32
Sus_scrofa___REV1	10.7138	3.56718	8.7657e-27	1.17956e-22
Sus_scrofa___CCND3	10.6508	2.53325	1.72917e-26	1.86148e-22
Sus_scrofa___RIPOR2	10.3946	3.2813	2.62355e-25	2.35359e-21
Sus_scrofa___ITGA4	10.333	3.36567	4.99544e-25	3.84121e-21
Sus_scrofa___TOX	10.2405	3.89175	1.3062e-24	7.81193e-21
Sus_scrofa___ARHGAP15	10.164	2.32425	2.86978e-24	1.54469e-20
Sus_scrofa___PTPRC	9.82151	1.96749	9.09746e-23	3.76677e-19
Sus_scrofa___ETS1	9.80166	3.49552	1.10752e-22	4.25811e-19
Sus_scrofa___FYN	9.64226	3.13007	5.3006e-22	1.90207e-18
Sus_scrofa___LEF1	9.51196	6.52178	1.871e-21	5.92403e-18
Sus_scrofa___SCML4	9.46795	4.25012	2.85382e-21	8.53387e-18
Sus_scrofa___BCL11B	9.33488	4.3233	1.01108e-20	2.59155e-17
Sus_scrofa___ENSSSCG00000013568	8.90872	2.40063	5.16271e-19	1.0688e-15
Sus_scrofa___PHACTR2	8.84535	2.88739	9.124e-19	1.81892e-15
Sus_scrofa___TSPAN5	8.64768	3.38979	5.25566e-18	9.12552e-15
Sus_scrofa___IMMP2L	8.56731	2.73455	1.05935e-17	1.78189e-14
Sus_scrofa___CAMK4	8.31324	4.1335	9.31273e-17	1.35478e-13
Sus_scrofa___ANKRD44	8.28026	1.78402	1.22907e-16	1.74095e-13
Sus_scrofa___ENSSSCG00000005095	8.24032	2.75742	1.71753e-16	2.37045e-13
Sus_scrofa___TXK	8.11821	3.88886	4.73092e-16	6.21089e-13
Sus_scrofa___PARP8	7.83838	2.61712	4.56395e-15	5.58316e-12
Sus_scrofa___NCALD	7.82316	2.67628	5.15153e-15	6.16191e-12
Sus_scrofa___KLF12	7.81144	2.77797	5.65362e-15	6.61547e-12
Sus_scrofa___CHST11	7.69464	2.28742	1.41891e-14	1.59113e-11
Sus_scrofa___ENSSSCG00000027790	7.59614	3.59087	3.05083e-14	3.21988e-11
Sus_scrofa___UTRN	7.39299	2.01753	1.43566e-13	1.45803e-10
Sus_scrofa___SAMHD1	7.36346	3.8277	1.79199e-13	1.75374e-10
Sus_scrofa___SFMBT2	7.361	2.72633	1.82541e-13	1.75454e-10
Sus_scrofa___ITK	7.32913	3.77193	2.3165e-13	2.14979e-10
Sus_scrofa___RASGRP1	7.01681	3.87247	2.26985e-12	1.93931e-09
Sus_scrofa___ST8SIA1	6.98236	2.47534	2.90265e-12	2.44122e-09
Sus_scrofa___MYCBP2	6.90944	1.5175	4.86566e-12	3.90894e-09
Sus_scrofa___CD2	6.834	3.44026	8.25807e-12	6.44201e-09
Sus_scrofa___ENSSSCG00000009240	6.73402	3.40315	1.65037e-11	1.23379e-08
Sus_scrofa___JAK1	6.66727	1.60197	2.6061e-11	1.92159e-08
Sus_scrofa___ZEB1	6.58233	2.43615	4.63129e-11	3.3687e-08
Sus_scrofa___ARAP2	6.52119	2.8658	6.97533e-11	4.86122e-08
Sus_scrofa___PDE3B	6.46713	2.52106	9.98813e-11	6.72026e-08
Sus_scrofa___ENSSSCG00000039658	6.28733	2.63944	3.22964e-10	2.04516e-07
Sus_scrofa___STK39	6.2326	3.01348	4.58757e-10	2.83828e-07
Sus_scrofa___CD247	6.22471	3.00532	4.82447e-10	2.95093e-07
Sus_scrofa___EPB41	6.20172	2.62552	5.58495e-10	3.34017e-07
Sus_scrofa___NLRC3	6.16529	3.11447	7.03533e-10	4.16136e-07
Sus_scrofa___MBNL1	6.12967	1.4315	8.80641e-10	5.09693e-07
Sus_scrofa___BTBD11	6.07062	2.88298	1.2742e-09	7.29629e-07
Sus_scrofa___IKZF1	6.01151	1.62704	1.83807e-09	1.01996e-06
Sus_scrofa___IL7R	5.96602	5.7264	2.43114e-09	1.29563e-06
Sus_scrofa___FOXO1	5.87097	2.49361	4.33246e-09	2.26407e-06
Sus_scrofa___STK38	5.83849	2.26825	5.26761e-09	2.72629e-06
Sus_scrofa___PPP1R16B	5.80872	2.50262	6.29527e-09	3.22714e-06
Sus_scrofa___TCF7	5.80101	4.55826	6.59151e-09	3.32927e-06
Sus_scrofa___RABGAP1L	5.74344	1.374	9.27697e-09	4.53947e-06
Sus_scrofa___CDC14A	5.71423	2.15321	1.10203e-08	5.34394e-06
Sus_scrofa___MAN1C1	5.69857	3.158	1.20815e-08	5.75484e-06
Sus_scrofa___PLCL1	5.61308	4.16568	1.98755e-08	9.14375e-06
Sus_scrofa___PLCL2	5.59138	1.9202	2.25266e-08	1.02755e-05
Sus_scrofa___RORA	5.57622	1.79732	2.45798e-08	1.10253e-05
Sus_scrofa___STAT4	5.53166	3.0545	3.17218e-08	1.41112e-05
Sus_scrofa___ABLIM1	5.41985	2.15309	5.96498e-08	2.54818e-05
Sus_scrofa___PRKCQ	5.41134	3.01257	6.25543e-08	2.65122e-05
Sus_scrofa___CD3E	5.38558	3.22872	7.22125e-08	3.03665e-05
Sus_scrofa___SF3B1	5.378	1.18203	7.53195e-08	3.14275e-05
Sus_scrofa___THEMIS	5.37103	4.22406	7.82878e-08	3.21673e-05
Sus_scrofa___ENSSSCG00000028092	5.30249	1.61771	1.14234e-07	4.55463e-05
Sus_scrofa___FOXN3	5.25515	1.04524	1.47902e-07	5.72732e-05
Sus_scrofa___FOXP1	5.24461	0.956274	1.56611e-07	5.99657e-05
Sus_scrofa___KCNQ5	5.24406	2.64153	1.57083e-07	5.99657e-05
Sus_scrofa___MSI2	5.21238	2.79119	1.86437e-07	7.06702e-05
Sus_scrofa___ENSSSCG00000016263	5.12103	1.38698	3.03873e-07	0.000112802
Sus_scrofa___FGD3	5.02481	2.56001	5.03923e-07	0.000180828
Sus_scrofa___TLK1	4.9948	2.40029	5.88981e-07	0.00020995
Sus_scrofa___HIVEP2	4.87898	2.40947	1.06637e-06	0.000367937
Sus_scrofa___BACH2	4.86061	3.75039	1.17024e-06	0.000401207
Sus_scrofa___CHD3	4.8301	1.98408	1.36464e-06	0.000459083
Sus_scrofa___ADD1	4.80243	1.92556	1.56756e-06	0.000514484
Sus_scrofa___PIK3CD	4.80113	1.83036	1.57772e-06	0.000514682
Sus_scrofa___NOL11	4.7427	1.12037	2.1089e-06	0.000675678
Sus_scrofa___STIM1	4.74116	1.47637	2.12501e-06	0.000676809
Sus_scrofa___CD38	4.72088	2.41042	2.34828e-06	0.000739174
Sus_scrofa___ZC3HAV1	4.71194	1.73846	2.45368e-06	0.000759035
Sus_scrofa___ARID1B	4.69271	0.994182	2.69609e-06	0.000819887
Sus_scrofa___FAM117A	4.67514	2.70622	2.93748e-06	0.000888275
Sus_scrofa___CD226	4.5907	2.3835	4.41762e-06	0.0013065
Sus_scrofa___LCK	4.56284	3.17311	5.04663e-06	0.00145262
Sus_scrofa___DDX17	4.45134	1.51982	8.53371e-06	0.00235557
Sus_scrofa___OGT	4.42884	2.20108	9.47413e-06	0.002577
Sus_scrofa___ENSSSCG00000009293	4.42872	2.29569	9.47955e-06	0.002577
Sus_scrofa___KIAA1109	4.40172	1.30652	1.07396e-05	0.00290488
Sus_scrofa___MLLT3	4.39136	3.19337	1.12642e-05	0.00300577
Sus_scrofa___IKZF3	4.39106	2.36731	1.12801e-05	0.00300577
Sus_scrofa___SLC44A2	4.35062	2.9573	1.35752e-05	0.00356438
Sus_scrofa___XYLT1	4.29293	1.00354	1.76331e-05	0.00454125
Sus_scrofa___SMC4	4.27413	2.40754	1.91885e-05	0.00491829
Sus_scrofa___SNRNP70	4.26285	1.30965	2.01836e-05	0.00514883
Sus_scrofa___BIN2	4.2557	1.40469	2.08396e-05	0.00529109
Sus_scrofa___PDE3A	4.24929	1.50674	2.14449e-05	0.0053939
Sus_scrofa___NLRC5	4.21249	1.56521	2.52568e-05	0.00632314
Sus_scrofa___TNRC6B	4.2099	1.11953	2.5548e-05	0.00633708
Sus_scrofa___STK17B	4.1863	1.30852	2.83543e-05	0.00700092

## Sheet: MP_LYVE1hi_1.0_sus
Gene	scores	log2FC	pvals	FDR
Sus_scrofa___ENSSSCG00000032896	19.5619	2.36073	3.26573e-85	1.75781e-80
Sus_scrofa___PDE4D	18.5154	2.05017	1.55233e-76	4.1778e-72
Sus_scrofa___FCHSD2	18.3746	1.89905	2.09848e-75	3.7651e-71
Sus_scrofa___ENSSSCG00000031640	17.7941	2.06531	7.85575e-71	1.05711e-66
Sus_scrofa___AGAP1	17.3622	1.50886	1.59368e-67	1.71563e-63
Sus_scrofa___DAB2	16.8983	1.62537	4.6345e-64	4.15761e-60
Sus_scrofa___ARHGAP24	16.5996	1.48449	7.01168e-62	5.39158e-58
Sus_scrofa___ENSSSCG00000013100	15.5904	2.04283	8.46328e-55	5.69431e-51
Sus_scrofa___CADM1	15.4603	1.75089	6.43054e-54	3.84589e-50
Sus_scrofa___HDAC9	14.9323	1.81501	2.03006e-50	1.0927e-46
Sus_scrofa___COLEC12	14.2511	1.58128	4.40978e-46	2.15783e-42
Sus_scrofa___BANK1	13.9458	1.41951	3.33488e-44	1.49586e-40
Sus_scrofa___RBPJ	13.4507	1.38819	3.05109e-41	1.17306e-37
Sus_scrofa___FCHO2	13.1952	1.22919	9.35558e-40	3.35716e-36
Sus_scrofa___ENSSSCG00000016687	13.1438	2.74355	1.84787e-39	6.21648e-36
Sus_scrofa___MTSS1	12.6238	1.13434	1.56083e-36	4.94194e-33
Sus_scrofa___FRMD4B	12.4311	1.17227	1.77111e-35	5.01745e-32
Sus_scrofa___PEPD	12.0514	1.82291	1.90709e-33	5.13254e-30
Sus_scrofa___TTN	12.01	1.29615	3.14895e-33	8.0712e-30
Sus_scrofa___CSF1R	11.7364	1.2765	8.29569e-32	2.02965e-28
Sus_scrofa___GAS7	11.6551	1.11322	2.16014e-31	5.05529e-28
Sus_scrofa___SNX29	11.6458	1.43107	2.40906e-31	5.40292e-28
Sus_scrofa___COMMD6	11.4589	2.16486	2.12112e-30	4.56686e-27
Sus_scrofa___NR3C1	11.4068	1.38806	3.86485e-30	8.00114e-27
Sus_scrofa___IQGAP2	11.3553	1.03039	6.98138e-30	1.39178e-26
Sus_scrofa___PID1	11.1561	1.31079	6.68255e-29	1.28462e-25
Sus_scrofa___ANKS1A	11.0782	1.29699	1.60098e-28	2.87248e-25
Sus_scrofa___SLC9A9	10.6918	1.02043	1.1115e-26	1.86962e-23
Sus_scrofa___DNM1	10.6445	1.63618	1.8498e-26	3.0172e-23
Sus_scrofa___SH3PXD2A	10.3628	1.54338	3.6624e-25	5.79801e-22
Sus_scrofa___ATG4C	10.2931	1.35542	7.56765e-25	1.16382e-21
Sus_scrofa___LSAMP	10.1966	1.86617	2.05394e-24	3.07099e-21
Sus_scrofa___BLNK	10.0815	1.29781	6.67098e-24	9.70465e-21
Sus_scrofa___SCARB1	10.0429	1.24482	9.87363e-24	1.39857e-20
Sus_scrofa___TESK2	9.83177	1.50419	8.21621e-23	1.13396e-19
Sus_scrofa___TNS3	9.79679	0.989574	1.16215e-22	1.56384e-19
Sus_scrofa___SBF2	9.72534	0.890184	2.35118e-22	3.0867e-19
Sus_scrofa___RGL1	9.59934	0.910182	8.04591e-22	1.03114e-18
Sus_scrofa___HPCAL1	9.31578	0.998145	1.21063e-20	1.51543e-17
Sus_scrofa___ROBO2	9.16097	2.06086	5.1434e-20	6.29201e-17
Sus_scrofa___ZFYVE16	9.14855	1.36631	5.77044e-20	6.90221e-17
Sus_scrofa___NCOA2	9.00648	0.875007	2.12782e-19	2.48983e-16
Sus_scrofa___CD163	8.97075	1.03077	2.94504e-19	3.37276e-16
Sus_scrofa___SSBP2	8.70181	2.12634	3.26635e-18	3.58805e-15
Sus_scrofa___SLC40A1	8.67016	2.19694	4.31499e-18	4.64517e-15
Sus_scrofa___MRC1	8.49034	0.833962	2.06034e-17	2.17451e-14
Sus_scrofa___LDLRAD4	8.44425	1.91285	3.06011e-17	3.16757e-14
Sus_scrofa___P2RY12	8.33608	1.31936	7.67938e-17	7.79906e-14
Sus_scrofa___FGD2	8.07307	1.04581	6.85494e-16	6.83285e-13
Sus_scrofa___ZMIZ1	8.04968	1.036	8.30098e-16	7.97872e-13
Sus_scrofa___WSB1	7.93092	1.11226	2.17532e-15	2.05419e-12
Sus_scrofa___UNC5C	7.90234	1.84731	2.73711e-15	2.54014e-12
Sus_scrofa___AP2A2	7.88714	1.02918	3.09186e-15	2.82072e-12
Sus_scrofa___MEF2A	7.67026	0.829125	1.71651e-14	1.4902e-11
Sus_scrofa___HERC1	7.64096	1.07161	2.15611e-14	1.84214e-11
Sus_scrofa___SMAP2	7.58114	0.969928	3.42526e-14	2.79346e-11
Sus_scrofa___STAB1	7.54501	0.833954	4.52255e-14	3.6333e-11
Sus_scrofa___RYR2	7.48789	1.18611	6.99918e-14	5.45997e-11
Sus_scrofa___KIAA1109	7.42295	0.974299	1.14544e-13	8.80778e-11
Sus_scrofa___GLUL	7.38429	1.44508	1.53265e-13	1.16192e-10
Sus_scrofa___NAV3	7.35262	0.93902	1.9436e-13	1.4331e-10
Sus_scrofa___STOX2	7.31452	2.00712	2.58307e-13	1.87887e-10
Sus_scrofa___IGF1	7.28035	2.07541	3.32945e-13	2.35804e-10
Sus_scrofa___FAM91A1	7.27618	1.28681	3.43393e-13	2.40045e-10
Sus_scrofa___PDCD4	7.20771	1.35083	5.68998e-13	3.87682e-10
Sus_scrofa___DDX17	7.20227	1.0383	5.92188e-13	3.94775e-10
Sus_scrofa___KMO	7.10487	1.24722	1.20434e-12	7.90545e-10
Sus_scrofa___OSBPL9	7.10007	0.860183	1.24697e-12	8.08668e-10
Sus_scrofa___ZNF704	7.09124	1.93984	1.3292e-12	8.5173e-10
Sus_scrofa___IL10RA	6.95858	0.961452	3.43731e-12	2.10246e-09
Sus_scrofa___ENSSSCG00000035736	6.84763	2.24305	7.5084e-12	4.46189e-09
Sus_scrofa___RASA1	6.78874	1.08822	1.13118e-11	6.40912e-09
Sus_scrofa___DEPTOR	6.66508	0.783845	2.64516e-11	1.46782e-08
Sus_scrofa___PTPRK	6.62629	1.29901	3.44237e-11	1.8907e-08
Sus_scrofa___SNX30	6.59664	0.999392	4.20583e-11	2.2867e-08
Sus_scrofa___ZFPM2	6.57015	1.30702	5.02654e-11	2.70559e-08
Sus_scrofa___TXNIP	6.4984	1.14178	8.11771e-11	4.24217e-08
Sus_scrofa___ITGB5	6.46983	1.27666	9.81153e-11	5.07803e-08
Sus_scrofa___PDE3A	6.40932	1.10977	1.46174e-10	7.4226e-08
Sus_scrofa___IGF1R	6.37564	1.1875	1.82195e-10	9.12513e-08
Sus_scrofa___PLEKHA2	6.37489	0.829295	1.83093e-10	9.12513e-08
Sus_scrofa___OSR1	6.32831	1.31265	2.47866e-10	1.224e-07
Sus_scrofa___CNNM2	6.22477	2.37457	4.82256e-10	2.27701e-07
Sus_scrofa___HSD11B1	6.17645	2.28207	6.55587e-10	3.04204e-07
Sus_scrofa___ENSSSCG00000006350	6.16061	0.914047	7.24637e-10	3.3337e-07
Sus_scrofa___MAN1A1	6.13951	1.17193	8.27779e-10	3.77594e-07
Sus_scrofa___STARD8	6.12159	2.09528	9.26488e-10	4.19068e-07
Sus_scrofa___SYNJ1	6.11397	0.782154	9.7182e-10	4.3591e-07
Sus_scrofa___AUTS2	6.10832	0.984617	1.00682e-09	4.44206e-07
Sus_scrofa___MS4A7	6.01999	0.977895	1.74427e-09	7.63309e-07
Sus_scrofa___AP1B1	5.96336	0.995233	2.47104e-09	1.04729e-06
Sus_scrofa___PALD1	5.86318	1.17961	4.54075e-09	1.88008e-06
Sus_scrofa___AQP9	5.71217	2.47005	1.11546e-08	4.48067e-06
Sus_scrofa___TLN2	5.70325	2.65628	1.17544e-08	4.68663e-06
Sus_scrofa___SELENOP	5.7005	0.824039	1.19457e-08	4.72786e-06
Sus_scrofa___BAZ2B	5.69242	0.926064	1.2525e-08	4.92096e-06
Sus_scrofa___OTULINL	5.66917	0.951425	1.43489e-08	5.55642e-06
Sus_scrofa___EPB41L3	5.55513	0.767793	2.77408e-08	1.00213e-05
Sus_scrofa___RPS6KC1	5.54618	0.805581	2.91975e-08	1.04772e-05
Sus_scrofa___MAP3K5	5.47128	1.06739	4.46792e-08	1.56162e-05

## Sheet: MP_groundstate_sus
Gene	scores	log2FC	pvals	FDR
Sus_scrofa___ENSSSCG00000032896	22.5301	2.60807	2.10338e-112	1.13217e-107
Sus_scrofa___PID1	21.2401	2.2899	4.07444e-100	1.09655e-95
Sus_scrofa___ARHGAP24	19.612	1.48788	1.22085e-85	2.19044e-81
Sus_scrofa___BANK1	18.7393	1.831	2.36592e-78	3.18371e-74
Sus_scrofa___PDE4D	17.7413	1.75375	2.01331e-70	2.16737e-66
Sus_scrofa___AGAP1	15.9445	1.20573	3.11143e-57	2.79126e-53
Sus_scrofa___FRMD4B	15.797	1.21449	3.26467e-56	2.51034e-52
Sus_scrofa___CADM1	15.6241	1.67911	4.9904e-55	2.98459e-51
Sus_scrofa___TTN	15.5899	1.52339	8.52873e-55	4.17334e-51
Sus_scrofa___ENSSSCG00000001456	15.2689	2.48959	1.2316e-52	5.52436e-49
Sus_scrofa___FCHSD2	14.7331	1.39524	3.94971e-49	1.63536e-45
Sus_scrofa___ENSSSCG00000031640	14.6454	1.70494	1.44096e-48	5.54009e-45
Sus_scrofa___FCHO2	14.3074	1.20324	1.96788e-46	7.06154e-43
Sus_scrofa___LRMDA	13.9959	1.07848	1.65094e-44	5.55396e-41
Sus_scrofa___SCARB1	13.3125	1.58016	1.95928e-40	6.20353e-37
Sus_scrofa___DAB2	13.2083	1.12868	7.86002e-40	2.35041e-36
Sus_scrofa___DISC1	12.5225	1.176	5.62021e-36	1.59217e-32
Sus_scrofa___BLNK	12.4835	1.51012	9.18943e-36	2.47315e-32
Sus_scrofa___PRKAG2	12.4163	1.17437	2.13316e-35	5.4676e-32
Sus_scrofa___CSF1R	12.3554	1.32154	4.55448e-35	1.06587e-31
Sus_scrofa___DEPTOR	12.2934	1.46746	9.82312e-35	2.20308e-31
Sus_scrofa___GAS7	12.0582	1.0725	1.75666e-33	3.63669e-30
Sus_scrofa___RBPJ	11.9887	1.04086	4.07061e-33	8.11499e-30
Sus_scrofa___FGD2	11.8609	1.61467	1.88864e-32	3.63063e-29
Sus_scrofa___RFTN1	11.581	1.35694	5.14332e-31	9.54635e-28
Sus_scrofa___P2RY12	10.3063	1.6709	6.59655e-25	1.07596e-21
Sus_scrofa___ARRB1	10.1526	1.18816	3.2271e-24	4.96291e-21
Sus_scrofa___SAT1	10.0577	0.840025	8.49424e-24	1.27003e-20
Sus_scrofa___CD163	10.0295	0.931191	1.13097e-23	1.64529e-20
Sus_scrofa___NAV3	9.82962	1.37267	8.39388e-23	1.15849e-19
Sus_scrofa___TNS3	9.58478	0.919255	9.2653e-22	1.18741e-18
Sus_scrofa___CIITA	9.39106	2.02479	5.93981e-21	7.26627e-18
Sus_scrofa___ABCA8	9.10213	2.12795	8.85754e-20	9.34835e-17
Sus_scrofa___UNC5C	9.04986	2.23191	1.43155e-19	1.48182e-16
Sus_scrofa___OTULINL	8.81404	1.48941	1.20716e-18	1.11674e-15
Sus_scrofa___PDCD4	8.58419	1.61426	9.14778e-18	7.69357e-15
Sus_scrofa___ENSSSCG00000006350	8.56967	1.40121	1.03782e-17	8.46387e-15
Sus_scrofa___COLEC12	8.45097	0.861974	2.8889e-17	2.25359e-14
Sus_scrofa___SMAP2	8.42358	1.17021	3.65155e-17	2.73417e-14
Sus_scrofa___EPS15	8.42339	0.815308	3.65735e-17	2.73417e-14
Sus_scrofa___MERTK	8.35646	0.90144	6.46296e-17	4.63833e-14
Sus_scrofa___SH3PXD2A	8.29816	1.34124	1.05732e-16	7.11388e-14
Sus_scrofa___ENSSSCG00000013100	8.29001	1.32594	1.13239e-16	7.50756e-14
Sus_scrofa___IL10RA	8.28882	1.1594	1.14372e-16	7.50756e-14
Sus_scrofa___NCOA2	8.24266	0.823617	1.68423e-16	1.09223e-13
Sus_scrofa___APC	8.17577	0.791884	2.93978e-16	1.88377e-13
Sus_scrofa___ENSSSCG00000005518	8.15521	0.844961	3.48572e-16	2.20732e-13
Sus_scrofa___HPCAL1	8.06204	0.888444	7.50288e-16	4.52147e-13
Sus_scrofa___KCNIP1	8.00742	1.99359	1.17137e-15	6.77959e-13
Sus_scrofa___SMURF1	7.81322	0.828243	5.57472e-15	3.0134e-12
Sus_scrofa___KMO	7.81268	1.42421	5.59841e-15	3.0134e-12
Sus_scrofa___PEPD	7.73987	1.21878	9.95203e-15	5.11757e-12
Sus_scrofa___SLA-DRB1	7.73947	2.04117	9.98299e-15	5.11757e-12
Sus_scrofa___ABCA6	7.65593	2.36894	1.91925e-14	9.7458e-12
Sus_scrofa___DNM1	7.64717	1.36088	2.05456e-14	1.03354e-11
Sus_scrofa___OSR1	7.59275	1.78581	3.13177e-14	1.56084e-11
Sus_scrofa___ATG4C	7.42905	1.10131	1.09379e-13	4.98934e-11
Sus_scrofa___CDK14	7.38749	1.00521	1.49629e-13	6.6016e-11
Sus_scrofa___FMNL2	7.32039	1.45352	2.47252e-13	1.05624e-10
Sus_scrofa___SNX29	7.3098	0.932311	2.6755e-13	1.13395e-10
Sus_scrofa___ROBO2	7.0829	1.92945	1.41171e-12	5.38911e-10
Sus_scrofa___TESK2	7.0621	1.2021	1.64e-12	6.21652e-10
Sus_scrofa___SLA-DQB1	6.92842	1.9494	4.25568e-12	1.56895e-09
Sus_scrofa___RYR2	6.87847	1.14404	6.04997e-12	2.17097e-09
Sus_scrofa___ZFYVE16	6.82354	1.15103	8.88215e-12	3.16616e-09
Sus_scrofa___DLC1	6.72903	1.2974	1.70797e-11	5.81855e-09
Sus_scrofa___LRRK2	6.72099	1.13431	1.80491e-11	6.11015e-09
Sus_scrofa___ITGAM	6.67806	0.824854	2.42131e-11	7.99568e-09
Sus_scrofa___SLC46A3	6.52416	1.69852	6.83841e-11	2.10334e-08
Sus_scrofa___SLCO2B1	6.51942	1.32309	7.058e-11	2.14635e-08
Sus_scrofa___ENSSSCG00000023479	6.4746	1.80222	9.5062e-11	2.82696e-08
Sus_scrofa___HMCN1	6.42107	1.19129	1.35317e-10	3.85375e-08
Sus_scrofa___ABCA9	6.4121	1.8978	1.43524e-10	4.04468e-08
Sus_scrofa___ARHGAP6	6.29828	0.786331	3.00958e-10	8.26498e-08
Sus_scrofa___IGF1	6.06734	2.22369	1.30042e-09	3.22565e-07
Sus_scrofa___TRHDE	5.96767	2.17636	2.4066e-09	5.78293e-07
Sus_scrofa___ADAP2	5.84537	1.18066	5.05434e-09	1.158e-06
Sus_scrofa___NR3C1	5.84533	0.803984	5.05575e-09	1.158e-06
Sus_scrofa___PLEKHA2	5.73313	0.806335	9.85923e-09	2.13126e-06
Sus_scrofa___CACNB2	5.72484	1.25634	1.03532e-08	2.22909e-06
Sus_scrofa___ENTPD1	5.32669	1.35024	1.00019e-07	1.77094e-05
Sus_scrofa___ENSSSCG00000033262	5.2299	0.939138	1.69603e-07	2.87077e-05
Sus_scrofa___RGS1	5.11868	1.24188	3.07681e-07	4.97334e-05
Sus_scrofa___FRMPD4	4.95732	1.64036	7.14705e-07	0.000109289
Sus_scrofa___GLUL	4.90226	1.23714	9.47395e-07	0.000143243
Sus_scrofa___SPTBN1	4.88117	1.1381	1.05461e-06	0.000157244
Sus_scrofa___SLC40A1	4.83523	1.62978	1.3299e-06	0.000192946
Sus_scrofa___IFNGR2	4.79216	0.886291	1.64996e-06	0.000236199
Sus_scrofa___PLCG2	4.65629	0.823337	3.21958e-06	0.000431088
Sus_scrofa___NCF4	4.62511	0.938644	3.74398e-06	0.000492722
Sus_scrofa___PDE3A	4.60083	0.854845	4.20807e-06	0.00054711
Sus_scrofa___AUTS2	4.5299	0.820981	5.90114e-06	0.000733568
Sus_scrofa___C1QB	4.52751	1.062	5.96835e-06	0.000740212
Sus_scrofa___PTPRK	4.48715	1.14235	7.21818e-06	0.000875727
Sus_scrofa___ENSSSCG00000033497	4.3359	0.791695	1.45164e-05	0.00165542
Sus_scrofa___LAIR1	4.32087	1.42665	1.55415e-05	0.00176336
Sus_scrofa___ENSSSCG00000049524	4.30814	1.09762	1.64635e-05	0.00185604
Sus_scrofa___ZFPM2	4.30788	1.13247	1.64825e-05	0.00185604
Sus_scrofa___LY86	4.26911	1.20173	1.96258e-05	0.0021781
Sus_scrofa___PDGFB	4.20294	1.73853	2.63473e-05	0.00283068

## Sheet: MP_ISG_sus
Gene	scores	log2FC	pvals	FDR
Sus_scrofa___MX2	15.1096	3.08553	1.3995e-51	7.53295e-47
Sus_scrofa___HERC6	14.5551	2.97299	5.41997e-48	1.45868e-43
Sus_scrofa___OAS2	13.5958	3.04817	4.24228e-42	7.6115e-38
Sus_scrofa___ENSSSCG00000017146	13.5062	2.39604	1.43708e-41	1.9338e-37
Sus_scrofa___HERC5	12.6808	3.53381	7.5516e-37	8.12944e-33
Sus_scrofa___EPSTI1	12.5412	2.8453	4.4404e-36	3.98348e-32
Sus_scrofa___MX1	12.1302	3.37604	7.30821e-34	5.6196e-30
Sus_scrofa___GHSR	11.0736	2.94458	1.68504e-28	1.13374e-24
Sus_scrofa___ZNFX1	10.3416	2.73733	4.56932e-25	2.73276e-21
Sus_scrofa___EIF2AK2	10.1646	2.10623	2.85173e-24	1.53497e-20
Sus_scrofa___STAT1	9.17645	1.8108	4.45548e-20	2.18019e-16
Sus_scrofa___TUT7	8.99385	1.07909	2.38728e-19	1.07081e-15
Sus_scrofa___ITSN1	8.75533	1.13917	2.03512e-18	8.42632e-15
Sus_scrofa___TRANK1	8.56695	2.18183	1.06266e-17	4.08563e-14
Sus_scrofa___PARP14	8.49124	2.35725	2.04445e-17	7.3363e-14
Sus_scrofa___PML	8.42946	1.89644	3.47257e-17	1.16822e-13
Sus_scrofa___APP	8.39799	1.22376	4.54179e-17	1.43804e-13
Sus_scrofa___TENT2	8.19363	1.59768	2.53456e-16	7.57917e-13
Sus_scrofa___PDE7B	8.17726	1.28512	2.9038e-16	8.22633e-13
Sus_scrofa___SAMD9	7.71058	2.01046	1.25251e-14	3.37088e-11
Sus_scrofa___ENSSSCG00000034570	7.62038	2.89005	2.52932e-14	6.483e-11
Sus_scrofa___IFI44L	7.61392	1.93443	2.65913e-14	6.50592e-11
Sus_scrofa___PARP12	7.57406	2.11574	3.61747e-14	8.46583e-11
Sus_scrofa___KYNU	7.4829	1.22138	7.27024e-14	1.63053e-10
Sus_scrofa___IFI44	7.46134	2.7864	8.56468e-14	1.84401e-10
Sus_scrofa___EHD4	7.31354	1.7428	2.60193e-13	5.33007e-10
Sus_scrofa___ENSSSCG00000009240	7.30989	2.45586	2.67365e-13	5.33007e-10
Sus_scrofa___ENSSSCG00000017754	7.30443	2.38706	2.78447e-13	5.35275e-10
Sus_scrofa___VAV3	7.27183	0.80863	3.54639e-13	6.58234e-10
Sus_scrofa___ENSSSCG00000051054	7.04239	1.86497	1.88973e-12	3.39055e-09
Sus_scrofa___SMCHD1	7.00185	1.23569	2.52613e-12	4.38617e-09
Sus_scrofa___NRP2	6.93244	1.38844	4.13638e-12	6.95765e-09
Sus_scrofa___SDC2	6.90872	1.12628	4.89052e-12	7.97689e-09
Sus_scrofa___ANTXR2	6.83931	1.03574	7.95731e-12	1.25974e-08
Sus_scrofa___ZC3HAV1	6.81382	1.22009	9.50375e-12	1.46157e-08
Sus_scrofa___IFIT2	6.79965	4.34107	1.0487e-11	1.56798e-08
Sus_scrofa___USP15	6.72961	1.08157	1.7012e-11	2.47483e-08
Sus_scrofa___MARCKS	6.33859	1.83248	2.3187e-10	3.20017e-07
Sus_scrofa___ATAD1	6.28673	2.13495	3.24217e-10	4.36283e-07
Sus_scrofa___IFIH1	6.25944	2.27206	3.86371e-10	5.07239e-07
Sus_scrofa___VPS54	6.25173	1.03948	4.05932e-10	5.20231e-07
Sus_scrofa___HEATR3	6.17968	1.22995	6.42332e-10	8.0405e-07
Sus_scrofa___TXNIP	6.15455	1.42492	7.52919e-10	9.2106e-07
Sus_scrofa___QKI	6.10642	0.846101	1.01891e-09	1.21876e-06
Sus_scrofa___CPQ	6.07696	0.916693	1.22486e-09	1.43146e-06
Sus_scrofa___SETX	6.0737	0.952783	1.24993e-09	1.43146e-06
Sus_scrofa___RSAD2	6.00177	3.24932	1.95177e-09	2.18866e-06
Sus_scrofa___UNC93B1	5.96809	1.47375	2.40043e-09	2.63685e-06
Sus_scrofa___SAMSN1	5.95758	1.24041	2.56007e-09	2.75597e-06
Sus_scrofa___PIK3AP1	5.86706	0.951605	4.43596e-09	4.67468e-06
Sus_scrofa___IFIT1	5.86409	2.81645	4.5161e-09	4.67468e-06
Sus_scrofa___ENSSSCG00000014280	5.714	0.928164	1.10351e-08	1.0884e-05
Sus_scrofa___IFIT5	5.71267	3.21352	1.11214e-08	1.0884e-05
Sus_scrofa___SIGLEC1	5.6236	2.56683	1.87016e-08	1.79756e-05
Sus_scrofa___AKAP7	5.61842	1.37649	1.92707e-08	1.81976e-05
Sus_scrofa___USP18	5.52963	2.91075	3.20903e-08	2.97809e-05
Sus_scrofa___OSBPL11	5.43321	0.986284	5.53482e-08	4.89379e-05
Sus_scrofa___ABCG2	5.43285	1.18833	5.54605e-08	4.89379e-05
Sus_scrofa___CMPK2	5.41069	2.97218	6.2781e-08	5.36389e-05
Sus_scrofa___USP25	5.38039	1.84672	7.43257e-08	6.25102e-05
Sus_scrofa___ENSSSCG00000001341	5.36907	0.879713	7.91447e-08	6.55391e-05
Sus_scrofa___NUBPL	5.2987	1.9047	1.1663e-07	9.51169e-05
Sus_scrofa___GRK3	5.28569	0.881145	1.25229e-07	0.000100605
Sus_scrofa___NLRC5	5.26928	0.847627	1.36962e-07	0.000106842
Sus_scrofa___XPR1	5.25286	2.1805	1.49756e-07	0.000114501
Sus_scrofa___RTN4	5.24009	0.940936	1.60494e-07	0.000119983
Sus_scrofa___SMAD3	5.23367	1.69502	1.66175e-07	0.000122528
Sus_scrofa___CAMK2D	5.18755	1.06264	2.13079e-07	0.000154989
Sus_scrofa___ZBP1	5.18249	2.32698	2.18941e-07	0.000157129
Sus_scrofa___ENSSSCG00000022773	5.16969	1.40311	2.34486e-07	0.000166072
Sus_scrofa___MORC3	5.10835	1.32092	3.24982e-07	0.000224262
Sus_scrofa___CMSS1	5.08724	1.09079	3.63317e-07	0.000247543
Sus_scrofa___OGFRL1	5.02735	0.927879	4.97312e-07	0.000333599
Sus_scrofa___NAGK	4.96613	1.58691	6.83016e-07	0.000448342
Sus_scrofa___ERC1	4.93161	1.07018	8.15545e-07	0.000522589
Sus_scrofa___SELENOP	4.91435	0.904262	8.90776e-07	0.000564081
Sus_scrofa___LCOR	4.87417	0.947642	1.09268e-06	0.000676028
Sus_scrofa___GNB4	4.84984	1.00825	1.23559e-06	0.000755761
Sus_scrofa___FBXO39	4.82042	0.952591	1.43257e-06	0.000866396
Sus_scrofa___NPTN	4.80842	1.13992	1.5213e-06	0.000909838
Sus_scrofa___LIMD1	4.78967	1.46945	1.67054e-06	0.000985425
Sus_scrofa___LSAMP	4.78803	1.09729	1.6843e-06	0.000985425
Sus_scrofa___ENSSSCG00000039473	4.76205	0.868533	1.91632e-06	0.00110912
Sus_scrofa___ANKFY1	4.74186	0.814831	2.11761e-06	0.00121258
Sus_scrofa___ABCA1	4.71814	0.959362	2.3801e-06	0.00134854
Sus_scrofa___TLK2	4.71087	1.06739	2.46656e-06	0.00138297
Sus_scrofa___ADGRG6	4.6939	1.47802	2.68052e-06	0.00148744
Sus_scrofa___AMBRA1	4.62108	0.879313	3.81749e-06	0.00207556
Sus_scrofa___XPO7	4.61072	1.24013	4.01271e-06	0.00215988
Sus_scrofa___CHSY1	4.56958	1.28995	4.88707e-06	0.00260447
Sus_scrofa___MOV10	4.53694	1.62179	5.70754e-06	0.0030119
Sus_scrofa___PPP2R2A	4.50439	1.12648	6.65642e-06	0.00344508
Sus_scrofa___DNAJC13	4.41415	0.935494	1.01407e-05	0.00510123
Sus_scrofa___SPATA5	4.41006	1.5384	1.03343e-05	0.00515051
Sus_scrofa___ENDOV	4.32388	1.6906	1.53312e-05	0.00750199
Sus_scrofa___ARMH3	4.30348	0.972826	1.68134e-05	0.00815312
Sus_scrofa___SNX13	4.30144	0.960342	1.69695e-05	0.00815535
Sus_scrofa___AXL	4.29698	1.45137	1.73141e-05	0.00824732
Sus_scrofa___FBXW11	4.24813	0.99707	2.15564e-05	0.0100025
Sus_scrofa___ISG15	4.23773	2.89167	2.25789e-05	0.0102994

## Sheet: MP_TREM2_sus
Gene	scores	log2FC	pvals	FDR
Sus_scrofa___F13A1	20.3419	2.27173	5.47885e-92	2.94905e-87
Sus_scrofa___SLC11A1	20.2032	2.34306	9.18168e-91	2.47107e-86
Sus_scrofa___CRACDL	16.8561	2.64657	9.45895e-64	1.27284e-59
Sus_scrofa___CD163	15.997	1.43202	1.34007e-57	1.44261e-53
Sus_scrofa___SDC2	14.9819	1.82164	9.64062e-51	7.41308e-47
Sus_scrofa___GAB2	14.2908	1.35862	2.49814e-46	1.68081e-42
Sus_scrofa___VAV3	14.1588	1.07616	1.64797e-45	9.85593e-42
Sus_scrofa___MARCHF1	13.9933	1.34051	1.71272e-44	9.21891e-41
Sus_scrofa___SNX24	13.844	1.5091	1.38289e-43	6.76685e-40
Sus_scrofa___NRP1	13.4919	1.20594	1.7449e-41	7.82673e-38
Sus_scrofa___PEAK1	13.2428	1.34525	4.96845e-40	2.05717e-36
Sus_scrofa___PSD3	13.0019	1.29279	1.19357e-38	4.58894e-35
Sus_scrofa___RBM47	12.5878	1.28115	2.46313e-36	8.8387e-33
Sus_scrofa___TUT7	12.4196	1.13216	2.04585e-35	6.88251e-32
Sus_scrofa___MGAT4A	11.5933	1.21319	4.45423e-31	1.33196e-27
Sus_scrofa___ENSSSCG00000026043	11.5242	2.28441	9.96433e-31	2.82284e-27
Sus_scrofa___APP	11.4268	1.16887	3.07045e-30	8.26351e-27
Sus_scrofa___DAPK1	11.2419	1.23567	2.53815e-29	6.20993e-26
Sus_scrofa___STAB1	11.0459	1.25132	2.29398e-28	5.36851e-25
Sus_scrofa___RGL1	10.8731	0.994448	1.54904e-27	3.33515e-24
Sus_scrofa___FMN1	10.8076	1.87991	3.16893e-27	6.56042e-24
Sus_scrofa___DOCK4	10.6113	0.864009	2.64177e-26	5.26651e-23
Sus_scrofa___ARHGAP22	10.5413	1.07746	5.57416e-26	1.0346e-22
Sus_scrofa___ARHGAP26	10.4881	1.0402	9.79468e-26	1.70067e-22
Sus_scrofa___MRC1	10.3214	0.935364	5.64064e-25	9.2004e-22
Sus_scrofa___SLC16A7	9.89219	1.39577	4.50079e-23	6.9217e-20
Sus_scrofa___ITGA9	9.76204	1.20565	1.63822e-22	2.44942e-19
Sus_scrofa___NUDT3	9.7421	1.72349	1.99386e-22	2.90058e-19
Sus_scrofa___EMILIN2	9.71564	1.571	2.58624e-22	3.66334e-19
Sus_scrofa___ZSWIM6	9.68349	0.91587	3.54413e-22	4.89145e-19
Sus_scrofa___WDFY3	9.51726	0.84119	1.77803e-21	2.27867e-18
Sus_scrofa___ALCAM	9.2407	1.33665	2.44896e-20	2.99585e-17
Sus_scrofa___SH3PXD2B	8.99419	1.5761	2.37986e-19	2.7255e-16
Sus_scrofa___MSR1	8.6746	1.21645	4.15009e-18	4.38006e-15
Sus_scrofa___GLIS3	8.65725	1.29864	4.83267e-18	4.90799e-15
Sus_scrofa___PPARG	8.5634	1.49347	1.0959e-17	1.05335e-14
Sus_scrofa___LDLRAD3	8.55051	1.33568	1.2255e-17	1.13731e-14
Sus_scrofa___RBPJ	8.45314	0.824426	2.83575e-17	2.58707e-14
Sus_scrofa___CPQ	8.44952	1.28578	2.92497e-17	2.62399e-14
Sus_scrofa___ITSN1	8.35187	0.824146	6.71923e-17	5.83338e-14
Sus_scrofa___ADGRL2	8.27093	1.34028	1.3292e-16	1.1007e-13
Sus_scrofa___VCAN	8.2203	1.48035	2.02985e-16	1.65543e-13
Sus_scrofa___MCTP1	8.12653	1.11023	4.41761e-16	3.44612e-13
Sus_scrofa___ENSSSCG00000014540	7.73101	1.38065	1.067e-14	7.0904e-12
Sus_scrofa___PDE7B	7.70308	0.859771	1.32831e-14	8.61414e-12
Sus_scrofa___SNX9	7.50108	0.819569	6.32931e-14	4.00802e-11
Sus_scrofa___CUX1	7.49844	0.955491	6.45839e-14	4.0422e-11
Sus_scrofa___CTSB	7.44189	1.14619	9.92538e-14	6.00274e-11
Sus_scrofa___BCAT1	7.41469	0.967357	1.21906e-13	7.29081e-11
Sus_scrofa___OSBPL1A	7.37225	1.32219	1.67777e-13	9.92392e-11
Sus_scrofa___SND1	7.2362	1.10565	4.61416e-13	2.56043e-10
Sus_scrofa___ABR	7.107	0.771022	1.18591e-12	6.3833e-10
Sus_scrofa___NCF2	6.8814	1.15433	5.9267e-12	3.00953e-09
Sus_scrofa___NPTN	6.70928	1.34846	1.95589e-11	8.92185e-09
Sus_scrofa___PLXNC1	6.6646	0.966843	2.65381e-11	1.17085e-08
Sus_scrofa___ARHGEF10L	6.65989	1.26211	2.74038e-11	1.19922e-08
Sus_scrofa___LGMN	6.61089	1.33611	3.82018e-11	1.65827e-08
Sus_scrofa___GPM6B	6.56063	1.42212	5.35797e-11	2.28887e-08
Sus_scrofa___IL1RAP	6.48417	1.59844	8.92184e-11	3.66585e-08
Sus_scrofa___CLCN5	6.4727	0.763436	9.62677e-11	3.92553e-08
Sus_scrofa___OSBPL11	6.44398	0.978132	1.16379e-10	4.70995e-08
Sus_scrofa___HTR7	6.43785	1.14537	1.21178e-10	4.86754e-08
Sus_scrofa___FAM13A	6.35178	0.931268	2.12843e-10	8.12518e-08
Sus_scrofa___TBC1D12	6.27474	1.28685	3.50216e-10	1.2737e-07
Sus_scrofa___PSAP	6.04634	1.318	1.48176e-09	4.74745e-07
Sus_scrofa___DENND4C	6.01977	1.2054	1.74667e-09	5.5631e-07
Sus_scrofa___RIN2	5.88755	0.789521	3.91958e-09	1.17863e-06
Sus_scrofa___ENSSSCG00000033457	5.86423	1.47391	4.51217e-09	1.33446e-06
Sus_scrofa___CARMIL1	5.77475	0.924926	7.70668e-09	2.21829e-06
Sus_scrofa___ENSSSCG00000032599	5.72751	1.67567	1.01916e-08	2.91795e-06
Sus_scrofa___MYO5A	5.71134	1.00697	1.12089e-08	3.19221e-06
Sus_scrofa___EEPD1	5.63347	1.07706	1.7662e-08	4.90039e-06
Sus_scrofa___NT5C2	5.62108	0.89941	1.89772e-08	5.2383e-06
Sus_scrofa___PPM1H	5.54142	0.983956	3.00027e-08	7.99468e-06
Sus_scrofa___SCARB2	5.51519	1.17737	3.48398e-08	9.23788e-06
Sus_scrofa___TFEC	5.44266	1.003	5.24893e-08	1.35181e-05
Sus_scrofa___SLC15A3	5.35709	1.55442	8.45737e-08	2.09782e-05
Sus_scrofa___SLC7A7	5.33691	1.03131	9.45424e-08	2.32367e-05
Sus_scrofa___TSEN2	5.27439	1.24002	1.33195e-07	3.22944e-05
Sus_scrofa___RAB7A	5.24002	0.882698	1.60562e-07	3.77397e-05
Sus_scrofa___KCNK13	5.22406	1.05289	1.75042e-07	4.0787e-05
Sus_scrofa___SPECC1	5.17029	0.98461	2.33727e-07	5.33076e-05
Sus_scrofa___RAB10	5.14317	1.01321	2.70135e-07	6.05846e-05
Sus_scrofa___OGFRL1	5.13419	0.9441	2.83367e-07	6.27675e-05
Sus_scrofa___IKBKB	5.00933	1.05895	5.46189e-07	0.000116202
Sus_scrofa___MAPK14	4.90355	0.970097	9.41176e-07	0.000192623
Sus_scrofa___TRPM2	4.80917	1.92985	1.51555e-06	0.000296639
Sus_scrofa___CCDC93	4.77925	1.27353	1.75949e-06	0.000334651
Sus_scrofa___FNIP1	4.76882	1.0113	1.85305e-06	0.000351205
Sus_scrofa___FTL	4.75881	1.72331	1.94734e-06	0.000366494
Sus_scrofa___RESF1	4.75494	0.917968	1.98509e-06	0.000372298
Sus_scrofa___NHLRC3	4.70921	0.979004	2.48675e-06	0.000456831
Sus_scrofa___GOLGB1	4.61976	1.05947	3.84186e-06	0.000682481
Sus_scrofa___HSP90B1	4.61719	2.06958	3.88969e-06	0.000688705
Sus_scrofa___hCD46	4.613	1.54982	3.969e-06	0.000700444
Sus_scrofa___ADAM19	4.52234	0.8533	6.11599e-06	0.00102694
Sus_scrofa___HMOX1	4.46131	1.50618	8.14584e-06	0.00132866
Sus_scrofa___TBC1D9B	4.42157	0.790539	9.79882e-06	0.00157442
Sus_scrofa___OGDH	4.31346	1.2987	1.60722e-05	0.00243691
Sus_scrofa___CERT1	4.31212	0.900682	1.61697e-05	0.00244481

## Sheet: MP_SPP1_sus
Gene	scores	log2FC	pvals	FDR
Sus_scrofa___ADGRL2	16.2549	2.44414	2.06327e-59	1.11058e-54
Sus_scrofa___SDC2	14.9112	2.00437	2.78866e-50	7.50511e-46
Sus_scrofa___SLC11A1	14.2567	1.7387	4.07431e-46	7.31013e-42
Sus_scrofa___ALCAM	13.6416	1.87192	2.26658e-42	3.05002e-38
Sus_scrofa___F13A1	13.4477	1.69329	3.17808e-41	3.42126e-37
Sus_scrofa___ENSSSCG00000014540	12.8693	2.15765	6.69802e-38	6.00879e-34
Sus_scrofa___CPQ	12.8034	1.78628	1.57026e-37	1.20744e-33
Sus_scrofa___PEAK1	12.7067	1.45022	5.42718e-37	3.65154e-33
Sus_scrofa___GAB2	12.5946	1.371	2.261e-36	1.35223e-32
Sus_scrofa___CRACDL	12.5317	2.10284	5.00976e-36	2.69656e-32
Sus_scrofa___SLC16A7	11.2701	1.60496	1.84371e-29	7.88785e-26
Sus_scrofa___VAV3	11.2672	1.03401	1.90507e-29	7.88785e-26
Sus_scrofa___SAMSN1	10.1576	1.61667	3.06482e-24	1.09978e-20
Sus_scrofa___PPARG	10.0071	1.58852	1.41831e-23	4.77136e-20
Sus_scrofa___TFEC	9.81147	1.47138	1.00496e-22	3.18194e-19
Sus_scrofa___CTSB	9.80534	1.35607	1.06785e-22	3.19323e-19
Sus_scrofa___CUX1	9.75555	1.14569	1.74659e-22	4.948e-19
Sus_scrofa___NRP1	9.72642	1.00581	2.32633e-22	6.26086e-19
Sus_scrofa___MSR1	9.70493	1.33327	2.87272e-22	7.36318e-19
Sus_scrofa___FNIP1	9.60924	1.51879	7.30884e-22	1.78821e-18
Sus_scrofa___APP	9.44861	1.17194	3.43351e-21	8.03531e-18
Sus_scrofa___CD44	9.36494	1.21495	7.60918e-21	1.63829e-17
Sus_scrofa___ARHGAP26	9.34221	1.01433	9.4347e-21	1.9532e-17
Sus_scrofa___NRP2	9.27554	1.4115	1.76723e-20	3.52307e-17
Sus_scrofa___MGAT4A	9.10781	1.02343	8.40652e-20	1.61603e-16
Sus_scrofa___ENSSSCG00000026043	9.10004	2.12472	9.02976e-20	1.67599e-16
Sus_scrofa___SNX24	8.92304	1.05586	4.53676e-19	8.13985e-16
Sus_scrofa___FAM13A	8.87072	1.14003	7.26759e-19	1.26189e-15
Sus_scrofa___EEPD1	8.69375	1.45289	3.50682e-18	5.89869e-15
Sus_scrofa___RASA2	8.66223	1.00743	4.62623e-18	7.5458e-15
Sus_scrofa___PRMT2	8.56326	1.1277	1.09719e-17	1.73699e-14
Sus_scrofa___MLLT10	8.49469	1.25095	1.98457e-17	3.00092e-14
Sus_scrofa___TANC2	8.49338	1.08775	2.00708e-17	3.00092e-14
Sus_scrofa___ENSSSCG00000033457	8.42426	1.74654	3.63043e-17	5.2814e-14
Sus_scrofa___IL1RAP	8.34019	1.86021	7.41683e-17	1.05057e-13
Sus_scrofa___CXCL2	8.30586	2.27614	9.90976e-17	1.3677e-13
Sus_scrofa___RBM47	8.25223	0.904754	1.55462e-16	2.09198e-13
Sus_scrofa___VMP1	8.15602	1.47857	3.46259e-16	4.43755e-13
Sus_scrofa___ATP6V1B2	8.13443	2.52085	4.13894e-16	5.18099e-13
Sus_scrofa___DENND1A	7.96732	0.939524	1.62159e-15	1.96238e-12
Sus_scrofa___ENSSSCG00000000530	7.96587	0.955398	1.64061e-15	1.96238e-12
Sus_scrofa___SNX9	7.90989	0.88312	2.57625e-15	3.01455e-12
Sus_scrofa___MARCHF1	7.82644	0.853622	5.01859e-15	5.74746e-12
Sus_scrofa___ABR	7.60551	0.854737	2.83786e-14	3.11736e-11
Sus_scrofa___LGMN	7.58634	1.34925	3.2906e-14	3.54239e-11
Sus_scrofa___SLC23A2	7.58163	1.14999	3.41251e-14	3.6016e-11
Sus_scrofa___LDLRAD3	7.52452	0.992012	5.29126e-14	5.47706e-11
Sus_scrofa___NCF2	7.48007	1.00783	7.42839e-14	7.43034e-11
Sus_scrofa___AMBRA1	7.47961	1.17504	7.45436e-14	7.43034e-11
Sus_scrofa___EMILIN2	7.46431	1.08169	8.37368e-14	8.15948e-11
Sus_scrofa___PELI1	7.46251	1.08753	8.48903e-14	8.15948e-11
Sus_scrofa___GOLM1	7.45809	1.03782	8.77883e-14	8.28999e-11
Sus_scrofa___OSBPL1A	7.44809	1.14821	9.46982e-14	8.78832e-11
Sus_scrofa___RASGEF1B	7.40462	1.17312	1.31526e-13	1.19991e-10
Sus_scrofa___ABCA1	7.3221	1.34357	2.44125e-13	2.15414e-10
Sus_scrofa___GLIS3	7.29042	1.08565	3.08995e-13	2.63999e-10
Sus_scrofa___CBLB	7.26067	1.15698	3.85173e-13	3.18959e-10
Sus_scrofa___PSAP	7.2284	1.11367	4.88709e-13	3.98564e-10
Sus_scrofa___TCF4	7.07538	0.914072	1.49042e-12	1.19736e-09
Sus_scrofa___OGDH	7.04403	1.49515	1.86763e-12	1.47834e-09
Sus_scrofa___FTL	7.03354	1.83149	2.01354e-12	1.57073e-09
Sus_scrofa___ETS2	7.01667	1.45681	2.27216e-12	1.74716e-09
Sus_scrofa___ENSSSCG00000012202	7.00485	2.23851	2.47259e-12	1.87451e-09
Sus_scrofa___MAML2	6.98532	0.757521	2.84208e-12	2.12469e-09
Sus_scrofa___QKI	6.91787	0.7735	4.58498e-12	3.3807e-09
Sus_scrofa___ECE1	6.88812	1.30841	5.65348e-12	4.05739e-09
Sus_scrofa___HTR7	6.83341	1.09409	8.29199e-12	5.84563e-09
Sus_scrofa___MAP3K8	6.8322	1.2621	8.36238e-12	5.84563e-09
Sus_scrofa___RCOR1	6.82804	0.906043	8.60846e-12	5.9405e-09
Sus_scrofa___GSK3B	6.75154	0.813853	1.46283e-11	9.96688e-09
Sus_scrofa___NDEL1	6.74902	1.63369	1.48849e-11	1.00149e-08
Sus_scrofa___RAB10	6.74168	1.12035	1.56566e-11	1.04041e-08
Sus_scrofa___PPM1H	6.71505	0.983668	1.88007e-11	1.23411e-08
Sus_scrofa___ARHGAP10	6.70948	0.952134	1.95324e-11	1.26669e-08
Sus_scrofa___EDNRB	6.66928	2.45388	2.57062e-11	1.64722e-08
Sus_scrofa___HMOX1	6.64536	1.52296	3.02468e-11	1.91537e-08
Sus_scrofa___KIF1B	6.62423	1.33795	3.49054e-11	2.18467e-08
Sus_scrofa___FMN1	6.6222	1.06035	3.53886e-11	2.18945e-08
Sus_scrofa___SPP1	6.60117	3.43687	4.07924e-11	2.49511e-08
Sus_scrofa___BCAT1	6.58476	0.763373	4.55629e-11	2.75558e-08
Sus_scrofa___GNPTAB	6.53696	1.3839	6.27819e-11	3.71351e-08
Sus_scrofa___SH3PXD2B	6.52834	1.05602	6.65009e-11	3.89074e-08
Sus_scrofa___GBE1	6.52661	1.66333	6.7276e-11	3.89376e-08
Sus_scrofa___SCARB2	6.51691	1.15576	7.17703e-11	4.10969e-08
Sus_scrofa___NHLRC3	6.5044	1.04073	7.80062e-11	4.38516e-08
Sus_scrofa___USP15	6.504	0.837478	7.82104e-11	4.38516e-08
Sus_scrofa___NUDT3	6.50017	0.992293	8.02294e-11	4.45199e-08
Sus_scrofa___TXNRD1	6.46086	1.76468	1.04111e-10	5.71827e-08
Sus_scrofa___DUSP1	6.43455	2.75006	1.23839e-10	6.7331e-08
Sus_scrofa___ENSSSCG00000005949	6.41892	1.33388	1.37241e-10	7.314e-08
Sus_scrofa___CDK6	6.38646	1.04991	1.69772e-10	8.95896e-08
Sus_scrofa___NT5C2	6.33106	0.825747	2.43482e-10	1.2724e-07
Sus_scrofa___ERC1	6.26698	1.14529	3.68116e-10	1.86926e-07
Sus_scrofa___PXK	6.26161	1.21877	3.81028e-10	1.91675e-07
Sus_scrofa___PLEK	6.17132	1.54524	6.77221e-10	3.31383e-07
Sus_scrofa___FMNL3	6.159	1.27152	7.32047e-10	3.54983e-07
Sus_scrofa___DENND4C	6.13846	0.997855	8.33245e-10	4.00449e-07
Sus_scrofa___CARMIL1	6.12159	0.825063	9.26463e-10	4.41308e-07
Sus_scrofa___SOAT1	6.09057	1.30375	1.12512e-09	5.31237e-07
Sus_scrofa___RAB1A	6.03582	1.18386	1.58155e-09	7.27593e-07

## Sheet: MP_LYVE1hi_2.0_sus
Gene	scores	log2FC	pvals	FDR
Sus_scrofa___SLC16A7	16.2614	1.73125	1.85307e-59	9.97435e-55
Sus_scrofa___PDGFC	16.2183	2.33537	3.74302e-59	1.00736e-54
Sus_scrofa___SLC11A1	15.7442	1.50932	7.52768e-56	1.35062e-51
Sus_scrofa___OSBPL11	15.5169	1.70983	2.66626e-54	3.58786e-50
Sus_scrofa___SDC2	15.2183	1.59318	2.67301e-52	2.87755e-48
Sus_scrofa___AAK1	14.8966	1.65466	3.46648e-50	3.10978e-46
Sus_scrofa___PSD3	14.8706	1.41724	5.1178e-50	3.9353e-46
Sus_scrofa___APP	14.6192	1.3489	2.12003e-48	1.42641e-44
Sus_scrofa___GLIS3	14.4831	1.73785	1.54966e-47	8.34123e-44
Sus_scrofa___GAB2	14.3136	1.23957	1.80025e-46	8.80913e-43
Sus_scrofa___F13A1	14.0353	1.40744	9.4858e-45	4.25486e-41
Sus_scrofa___CPQ	13.5183	1.40237	1.21995e-41	5.05115e-38
Sus_scrofa___ARHGAP26	13.3876	1.1585	7.14784e-41	2.74814e-37
Sus_scrofa___SNX24	13.3716	1.221	8.86439e-41	3.1809e-37
Sus_scrofa___MSR1	13.2399	1.2652	5.16512e-40	1.73761e-36
Sus_scrofa___FAM13A	12.9681	1.31596	1.8557e-38	5.87557e-35
Sus_scrofa___PDE7B	12.9624	1.2699	2.00007e-38	5.98089e-35
Sus_scrofa___NUDT3	12.8959	1.68607	4.74413e-38	1.33355e-34
Sus_scrofa___TTC7B	12.8926	1.42184	4.95505e-38	1.33355e-34
Sus_scrofa___DAPK1	12.8666	1.1993	6.93521e-38	1.77759e-34
Sus_scrofa___NPTN	12.6717	1.76076	8.48307e-37	1.98526e-33
Sus_scrofa___NT5C2	12.6433	1.2929	1.21832e-36	2.73238e-33
Sus_scrofa___FNIP1	12.64	1.50331	1.27052e-36	2.73548e-33
Sus_scrofa___TUT7	12.57	1.00241	3.08769e-36	6.39223e-33
Sus_scrofa___PEAK1	12.2651	1.09115	1.39413e-34	2.77927e-31
Sus_scrofa___FMN1	12.2179	1.49675	2.49389e-34	4.79415e-31
Sus_scrofa___PRMT2	12.0759	1.19479	1.41583e-33	2.62787e-30
Sus_scrofa___RBM47	12.0349	1.04454	2.32913e-33	4.17892e-30
Sus_scrofa___MARCHF1	11.9311	1.0313	8.15112e-33	1.4153e-29
Sus_scrofa___PPARG	11.7456	1.25442	7.44284e-32	1.25193e-28
Sus_scrofa___ADGRL2	11.7186	1.28723	1.02324e-31	1.669e-28
Sus_scrofa___OSBPL1A	11.5584	1.33845	6.69297e-31	1.05958e-27
Sus_scrofa___RAB10	11.3738	1.35848	5.64694e-30	8.68434e-27
Sus_scrofa___TENT2	11.3267	1.29061	9.6791e-30	1.44719e-26
Sus_scrofa___ENSSSCG00000000530	11.3225	0.945616	1.01581e-29	1.47776e-26
Sus_scrofa___BCAT1	11.2532	1.06353	2.23368e-29	3.16394e-26
Sus_scrofa___AMBRA1	11.2353	1.25057	2.73667e-29	3.77702e-26
Sus_scrofa___TMCC1	11.1665	1.02642	5.9448e-29	7.99962e-26
Sus_scrofa___ZBTB38	11.1014	1.64725	1.23496e-28	1.6213e-25
Sus_scrofa___CRACDL	10.9725	1.29009	5.18004e-28	6.63859e-25
Sus_scrofa___CPEB3	10.7354	2.05547	6.94033e-27	8.68768e-24
Sus_scrofa___SAMD4A	10.6476	1.19744	1.7893e-26	2.18888e-23
Sus_scrofa___MLLT10	10.6237	1.16723	2.31331e-26	2.76702e-23
Sus_scrofa___RIN2	10.615	1.02964	2.53739e-26	2.96908e-23
Sus_scrofa___KIF1B	10.602	1.38181	2.91532e-26	3.33872e-23
Sus_scrofa___MCTP1	10.576	1.09435	3.85214e-26	4.31969e-23
Sus_scrofa___ENSSSCG00000004441	10.5318	1.3021	6.16536e-26	6.77258e-23
Sus_scrofa___SH3PXD2B	10.512	1.2216	7.60677e-26	8.18884e-23
Sus_scrofa___RGL1	10.5059	0.90611	8.11284e-26	8.56239e-23
Sus_scrofa___OGDH	10.4421	1.54573	1.59263e-25	1.64855e-22
Sus_scrofa___DENND1A	10.3332	0.972922	4.98919e-25	5.06694e-22
Sus_scrofa___NHLRC3	10.2791	1.25469	8.75291e-25	8.72471e-22
Sus_scrofa___CBLB	10.2615	1.00172	1.05039e-24	1.02797e-21
Sus_scrofa___RAB1A	10.1044	1.37363	5.28191e-24	5.07686e-21
Sus_scrofa___MRTFB	10.0927	1.30214	5.95005e-24	5.61873e-21
Sus_scrofa___PSAP	10.0643	1.22101	7.94789e-24	7.37592e-21
Sus_scrofa___DENND4C	10.0614	1.09	8.18214e-24	7.4646e-21
Sus_scrofa___CRK	10.0398	1.43484	1.01909e-23	9.14223e-21
Sus_scrofa___ADK	9.95	1.619	2.52194e-23	2.22534e-20
Sus_scrofa___VAV3	9.91566	0.787989	3.55886e-23	3.08966e-20
Sus_scrofa___CRYBG3	9.89128	1.46938	4.54179e-23	3.88042e-20
Sus_scrofa___CD163	9.88677	1.06641	4.75097e-23	3.99571e-20
Sus_scrofa___NRP1	9.85153	0.816216	6.75065e-23	5.59016e-20
Sus_scrofa___DOCK4	9.81283	0.80081	9.91489e-23	8.08604e-20
Sus_scrofa___SNX13	9.78693	1.28582	1.2812e-22	1.02928e-19
Sus_scrofa___CUX1	9.7656	0.885724	1.58166e-22	1.25198e-19
Sus_scrofa___EPB41L3	9.75961	1.04797	1.67796e-22	1.30896e-19
Sus_scrofa___ITSN1	9.7366	0.856608	2.1047e-22	1.6184e-19
Sus_scrofa___NRIP1	9.70472	1.25389	2.87872e-22	2.18239e-19
Sus_scrofa___ENSSSCG00000006231	9.69719	1.41213	3.09929e-22	2.31697e-19
Sus_scrofa___CCDC93	9.6744	1.43575	3.87364e-22	2.8562e-19
Sus_scrofa___USP15	9.6449	0.948548	5.16599e-22	3.75763e-19
Sus_scrofa___ALCAM	9.62486	1.03009	6.27898e-22	4.5063e-19
Sus_scrofa___GLG1	9.6079	0.981708	7.40408e-22	5.24384e-19
Sus_scrofa___TFEC	9.58207	0.932965	9.51237e-22	6.64952e-19
Sus_scrofa___ZZZ3	9.56403	1.25534	1.13256e-21	7.81551e-19
Sus_scrofa___EMILIN2	9.55788	0.973596	1.20199e-21	8.18966e-19
Sus_scrofa___ZCCHC7	9.51002	1.03597	1.90629e-21	1.2826e-18
Sus_scrofa___VPS54	9.47406	1.002	2.69164e-21	1.78865e-18
Sus_scrofa___EHD4	9.45787	1.3698	3.14271e-21	2.06292e-18
Sus_scrofa___KDM4C	9.43893	1.10126	3.76593e-21	2.44223e-18
Sus_scrofa___HIP1	9.40826	1.57995	5.04435e-21	3.23235e-18
Sus_scrofa___UBE2K	9.40147	1.4002	5.38076e-21	3.40735e-18
Sus_scrofa___RESF1	9.38621	0.939502	6.21976e-21	3.89285e-18
Sus_scrofa___CMSS1	9.32478	1.07175	1.1122e-20	6.80287e-18
Sus_scrofa___UBE2E2	9.31383	0.801021	1.23299e-20	7.45697e-18
Sus_scrofa___ARHGAP35	9.28824	0.987105	1.56857e-20	9.38109e-18
Sus_scrofa___MRC1	9.26375	0.829033	1.97375e-20	1.15745e-17
Sus_scrofa___LSAMP	9.2635	1.42309	1.97833e-20	1.15745e-17
Sus_scrofa___NRP2	9.25383	1.0193	2.16595e-20	1.2536e-17
Sus_scrofa___ENSSSCG00000033457	9.2243	1.34894	2.85406e-20	1.63429e-17
Sus_scrofa___MGAT4A	9.21823	0.773247	3.02045e-20	1.71136e-17
Sus_scrofa___ENSSSCG00000028674	9.17744	2.71311	4.41473e-20	2.47528e-17
Sus_scrofa___ATXN2	9.15814	1.0452	5.27993e-20	2.89997e-17
Sus_scrofa___VCAN	9.07689	1.30246	1.11727e-19	6.0138e-17
Sus_scrofa___DYM	9.06746	1.31865	1.21828e-19	6.49257e-17
Sus_scrofa___GSK3B	9.04547	0.839923	1.49028e-19	7.86432e-17
Sus_scrofa___GBF1	9.0345	1.516	1.64757e-19	8.60991e-17
Sus_scrofa___VMP1	9.0238	1.1878	1.81667e-19	9.40232e-17
Sus_scrofa___RAB7A	8.95673	0.898565	3.34439e-19	1.71443e-16

[truncated: 8 more sheets: NK_CD69hi_sus, NK_CD16hi_IFNhi_sus, Prolif_Immune_sus, Unclassified_sus, B_cells_sus, Innate_lymphoid_cells_sus, NK_CD16hi_sus, DC_sus]
