# Supplementary material for: Integrated Molecular Profiling of Preclinical and Clinical Cardiac Xenotransplants
Source: Research Square preprint supplement (doi:10.21203/rs.3.rs-8406985/v1), 2026-02-04
Supplement: Supplementary file 18 [file 7a2de4fcb32dd6fcb40d6362.xlsx]

## Sheet: CM
Gene	logFC	logCPM	F	PValue	FDR	Observations_PCMV	Observations_Control	level
Sus_scrofa___THBD	5.08519	2.59738	189.205	4.24273e-13	1.06183e-08	3	4	Up-regulated
Sus_scrofa___hCD46	14.3227	6.5793	211.521	1.64297e-12	2.05593e-08	3	4	Up-regulated
Sus_scrofa___MOB3B	5.49481	4.62747	138.248	1.69927e-11	1.06319e-07	3	4	Up-regulated
Sus_scrofa___PEA15	2.6736	3.99775	112.159	1.42784e-10	6.84963e-07	3	4	Up-regulated
Sus_scrofa___ISG20	6.86513	1.01296	75.5902	1.64214e-10	6.84963e-07	3	4	Up-regulated
Sus_scrofa___ENSSSCG00000014672	7.24649	1.12893	74.409	5.82566e-10	1.82249e-06	3	4	Up-regulated
Sus_scrofa___C1orf115	6.09344	1.69053	93.524	6.55566e-10	1.82298e-06	3	4	Up-regulated
Sus_scrofa___ENSSSCG00000013366	5.46371	5.04922	88.2804	1.51009e-09	3.34734e-06	3	4	Up-regulated
Sus_scrofa___HLA-DOB	6.31582	0.368129	63.4625	1.58535e-09	3.34734e-06	3	4	Up-regulated
Sus_scrofa___ENSSSCG00000008898	7.29393	0.685446	73.5559	1.60565e-09	3.34734e-06	3	4	Up-regulated
Sus_scrofa___ZBP1	6.73777	-0.00291928	60.553	1.73874e-09	3.34734e-06	3	4	Up-regulated
Sus_scrofa___FOXS1	11.1343	4.63193	69.7448	2.5637e-09	4.58298e-06	3	4	Up-regulated
Sus_scrofa___ARMC12	4.28788	2.59367	80.9856	3.48131e-09	5.67437e-06	3	4	Up-regulated
Sus_scrofa___CMIP	3.43486	4.79174	80.4561	3.62768e-09	5.67437e-06	3	4	Up-regulated
Sus_scrofa___IFI35	5.71822	-0.318558	63.0154	4.17144e-09	5.79992e-06	3	4	Up-regulated
Sus_scrofa___STX3	4.69956	1.61651	76.7489	5.82577e-09	7.42119e-06	3	4	Up-regulated
Sus_scrofa___MX2	11.9512	5.7999	64.0563	7.25662e-09	8.64817e-06	3	4	Up-regulated
Sus_scrofa___RAB32	2.73736	7.13657	72.8337	9.15016e-09	9.68276e-06	3	4	Up-regulated
Sus_scrofa___ETV7	6.53689	1.22725	62.9956	9.28542e-09	9.68276e-06	3	4	Up-regulated
Sus_scrofa___CNN3	8.17095	1.69684	61.4638	1.25599e-08	1.25734e-05	3	4	Up-regulated
Sus_scrofa___FAM171B	3.82121	3.43167	68.1699	1.68685e-08	1.62372e-05	3	4	Up-regulated
Sus_scrofa___ENSSSCG00000016263	6.59627	3.00263	62.2434	2.85582e-08	2.42863e-05	3	4	Up-regulated
Sus_scrofa___PIR	3.00136	3.42575	64.0037	2.96159e-08	2.42863e-05	3	4	Up-regulated
Sus_scrofa___MTPN	2.6209	7.06224	63.7016	3.07679e-08	2.42863e-05	3	4	Up-regulated
Sus_scrofa___LAT2	2.71631	2.49945	63.6988	3.10529e-08	2.42863e-05	3	4	Up-regulated
Sus_scrofa___LGALS1	6.14726	1.27408	58.7602	3.54272e-08	2.68678e-05	3	4	Up-regulated
Sus_scrofa___UBE2L6	8.08098	2.86284	58.6648	3.88793e-08	2.8419e-05	3	4	Up-regulated
Sus_scrofa___ENSSSCG00000001398	7.18397	1.1865	54.1417	3.97437e-08	2.8419e-05	3	4	Up-regulated
Sus_scrofa___STAC2	8.24882	6.49359	61.6059	4.17719e-08	2.90396e-05	3	4	Up-regulated
Sus_scrofa___TRIM22	7.85783	0.442437	49.0438	4.37598e-08	2.95993e-05	3	4	Up-regulated
Sus_scrofa___LAX1	5.01004	0.365985	57.564	4.57569e-08	3.01358e-05	3	4	Up-regulated
Sus_scrofa___RPS6KA1	4.58218	0.605768	58.5463	4.74413e-08	3.04439e-05	3	4	Up-regulated
Sus_scrofa___FBXO39	3.29544	6.76642	59.8337	5.34813e-08	3.28509e-05	3	4	Up-regulated
Sus_scrofa___SLC22A15	2.43545	7.9369	59.7907	5.38174e-08	3.28509e-05	3	4	Up-regulated
Sus_scrofa___HERC5	7.75844	5.91062	59.6278	5.56282e-08	3.31478e-05	3	4	Up-regulated
Sus_scrofa___RIMKLA	3.43648	0.465553	59.6732	5.82528e-08	3.3323e-05	3	4	Up-regulated
Sus_scrofa___ZNFX1	4.27479	5.65582	59.2146	5.85852e-08	3.3323e-05	3	4	Up-regulated
Sus_scrofa___FARP1	1.79116	6.8275	58.8625	6.16944e-08	3.35658e-05	3	4	Up-regulated
Sus_scrofa___ENSSSCG00000035669	7.60304	1.30925	51.8663	6.59677e-08	3.51271e-05	3	4	Up-regulated
Sus_scrofa___KRT80	3.87845	5.30676	57.9239	7.09707e-08	3.70038e-05	3	4	Up-regulated
Sus_scrofa___SLC16A3	5.02547	2.72745	57.9354	7.34085e-08	3.74938e-05	3	4	Up-regulated
Sus_scrofa___CCDC194	4.43408	0.520062	54.2149	7.87639e-08	3.85981e-05	3	4	Up-regulated
Sus_scrofa___LYN	2.97436	2.0939	57.1441	8.10002e-08	3.85981e-05	3	4	Up-regulated
Sus_scrofa___S100A6	4.53876	-0.558391	42.7369	8.16506e-08	3.85981e-05	3	4	Up-regulated
Sus_scrofa___SLC1A4	3.33407	4.22584	56.5883	8.68864e-08	4.02686e-05	3	4	Up-regulated
Sus_scrofa___ANO6	6.30645	5.92854	56.1137	9.36301e-08	4.18443e-05	3	4	Up-regulated
Sus_scrofa___TTC39C	3.50415	0.988596	55.9315	1.01687e-07	4.42135e-05	3	4	Up-regulated
Sus_scrofa___CCDC180	3.50518	5.73365	55.3078	1.05664e-07	4.42135e-05	3	4	Up-regulated
Sus_scrofa___RASAL1	6.63101	3.29671	52.7929	1.05958e-07	4.42135e-05	3	4	Up-regulated
Sus_scrofa___DDHD1	1.76817	6.29298	55.1799	1.07765e-07	4.42135e-05	3	4	Up-regulated
Sus_scrofa___SHFL	5.4992	-0.330822	41.7932	1.20089e-07	4.76028e-05	3	4	Up-regulated
Sus_scrofa___ENSSSCG00000031163	4.68406	0.0241153	41.597	1.21294e-07	4.76028e-05	3	4	Up-regulated
Sus_scrofa___XIAP	1.90419	8.48449	54.3977	1.21732e-07	4.76028e-05	3	4	Up-regulated
Sus_scrofa___TRIM38	4.99631	-1.46914	40.7799	1.29166e-07	4.91686e-05	3	4	Up-regulated
Sus_scrofa___ENSSSCG00000001396	4.51584	-0.613356	47.3738	1.29665e-07	4.91686e-05	3	4	Up-regulated
Sus_scrofa___HTATIP2	1.86535	3.73267	53.7698	1.34514e-07	5.02459e-05	3	4	Up-regulated
Sus_scrofa___EDN1	7.17873	1.07266	42.6999	1.4607e-07	5.29809e-05	3	4	Up-regulated
Sus_scrofa___IFIT1	8.65389	5.94818	53.1768	1.50992e-07	5.32565e-05	3	4	Up-regulated
Sus_scrofa___GK5	2.41491	4.8643	53.0327	1.51085e-07	5.32565e-05	3	4	Up-regulated
Sus_scrofa___FSTL3	3.00772	4.42455	52.7346	1.58468e-07	5.40224e-05	3	4	Up-regulated
Sus_scrofa___SETX	2.67245	6.19718	52.7218	1.58731e-07	5.40224e-05	3	4	Up-regulated
Sus_scrofa___MMP25	6.5692	2.48748	52.3829	1.60528e-07	5.40224e-05	3	4	Up-regulated
Sus_scrofa___HES4	7.80257	0.619709	46.9554	1.61892e-07	5.40224e-05	3	4	Up-regulated
Sus_scrofa___STK17A	3.13535	2.79652	52.4184	1.67577e-07	5.51837e-05	3	4	Up-regulated
Sus_scrofa___IKBKE	4.46738	-0.00310796	49.1423	1.74659e-07	5.60409e-05	3	4	Up-regulated
Sus_scrofa___MOSPD1	1.76397	5.40178	51.8266	1.83354e-07	5.8086e-05	3	4	Up-regulated
Sus_scrofa___BST2	13.0343	3.42664	56.6989	1.88202e-07	5.88768e-05	3	4	Up-regulated
Sus_scrofa___LIMK1	2.18914	3.62432	51.5593	1.9174e-07	5.92429e-05	3	4	Up-regulated
Sus_scrofa___EPN3	3.5667	-0.91542	47.1573	2.06606e-07	6.30576e-05	3	4	Up-regulated
Sus_scrofa___ARID5A	4.28435	4.7238	50.9905	2.10449e-07	6.34568e-05	3	4	Up-regulated
Sus_scrofa___TEP1	1.7509	4.6827	50.8429	2.15316e-07	6.41514e-05	3	4	Up-regulated
Sus_scrofa___ENSSSCG00000017754	4.74364	3.60886	50.7853	2.18542e-07	6.43465e-05	3	4	Up-regulated
Sus_scrofa___ENSSSCG00000015823	3.47591	1.31392	50.8442	2.25656e-07	6.56684e-05	3	4	Up-regulated
Sus_scrofa___SH3D19	3.77424	4.51164	50.2419	2.37922e-07	6.76645e-05	3	4	Up-regulated
Sus_scrofa___ELF4	3.94879	0.914539	50.3598	2.41866e-07	6.80131e-05	3	4	Up-regulated
Sus_scrofa___MX1	10.0868	6.01788	49.1109	2.82223e-07	7.84799e-05	3	4	Up-regulated
Sus_scrofa___OAS2	7.13803	6.73714	49.0147	2.91973e-07	8.01011e-05	3	4	Up-regulated
Sus_scrofa___phTBM	10.647	2.82073	53.9965	2.94975e-07	8.01011e-05	3	4	Up-regulated
Sus_scrofa___STX12	1.57669	6.47385	48.8908	2.97865e-07	8.01011e-05	3	4	Up-regulated
Sus_scrofa___ENSSSCG00000051689	3.5714	0.326805	48.2388	3.00855e-07	8.01011e-05	3	4	Up-regulated
Sus_scrofa___CEBPG	2.03284	3.93135	48.7407	3.05695e-07	8.05328e-05	3	4	Up-regulated
Sus_scrofa___XPO6	1.43375	6.30616	48.6143	3.1212e-07	8.13691e-05	3	4	Up-regulated
Sus_scrofa___CHMP4B	1.84948	6.46292	48.0593	3.43001e-07	8.84978e-05	3	4	Up-regulated
Sus_scrofa___UBA7	8.5229	-0.443729	41.9903	3.51733e-07	8.98247e-05	3	4	Up-regulated
Sus_scrofa___ITGAV	2.27107	8.87171	47.4718	3.79334e-07	9.30744e-05	3	4	Up-regulated
Sus_scrofa___ENSSSCG00000032436	9.32066	1.97178	39.6785	3.88263e-07	9.3914e-05	3	4	Up-regulated
Sus_scrofa___ZDHHC14	5.73101	5.09856	47.2995	3.91355e-07	9.3914e-05	3	4	Up-regulated
Sus_scrofa___PLSCR1	3.47711	4.38227	47.2555	3.94013e-07	9.3914e-05	3	4	Up-regulated
Sus_scrofa___DES	3.16803	8.83891	47.1377	4.0184e-07	9.41555e-05	3	4	Up-regulated
Sus_scrofa___F2	3.97367	2.20296	47.2226	4.02551e-07	9.41555e-05	3	4	Up-regulated
Sus_scrofa___MAP1A	5.12047	1.10334	46.8266	4.06987e-07	9.43116e-05	3	4	Up-regulated
Sus_scrofa___CLCN5	3.06473	4.78558	46.5077	4.4846e-07	0.000101113	3	4	Up-regulated
Sus_scrofa___STX11	2.8375	3.04272	46.3118	4.65826e-07	0.00010317	3	4	Up-regulated
Sus_scrofa___IFIT2	7.18079	4.6491	46.0324	4.98587e-07	0.000108505	3	4	Up-regulated
Sus_scrofa___SCNN1A	3.16907	1.82134	45.9309	5.0878e-07	0.000109769	3	4	Up-regulated
Sus_scrofa___SLCO2A1	7.04585	5.20787	45.8062	5.17545e-07	0.000110706	3	4	Up-regulated
Sus_scrofa___ENSSSCG00000010517	1.6276	5.31195	45.5438	5.31132e-07	0.00011265	3	4	Up-regulated
Sus_scrofa___DNAJB9	2.23443	4.01108	45.4129	5.44013e-07	0.000113458	3	4	Up-regulated
Sus_scrofa___PLEKHO1	2.54278	2.02355	45.4236	5.49158e-07	0.000113585	3	4	Up-regulated
Sus_scrofa___H2BC21	3.45954	2.79504	45.0799	5.79624e-07	0.000115747	3	4	Up-regulated
Sus_scrofa___LOXL2	3.86837	5.44383	45.0188	5.83186e-07	0.000115747	3	4	Up-regulated
Sus_scrofa___CMAS	2.28862	4.25472	44.9912	5.86175e-07	0.000115747	3	4	Up-regulated
Sus_scrofa___MAP2K1	1.5645	6.45333	44.9772	5.87363e-07	0.000115747	3	4	Up-regulated
Sus_scrofa___TRIM26	4.19035	3.75443	44.6739	6.21404e-07	0.0001198	3	4	Up-regulated
Sus_scrofa___NLRC5	6.45302	6.31095	44.6577	6.22286e-07	0.0001198	3	4	Up-regulated
Sus_scrofa___AFF2	4.07611	3.05223	44.5821	6.3582e-07	0.000121471	3	4	Up-regulated
Sus_scrofa___ETS1	3.49954	4.02052	44.4075	6.51394e-07	0.000123503	3	4	Up-regulated
Sus_scrofa___YBX3	2.14567	8.31652	44.1994	6.75386e-07	0.000127089	3	4	Up-regulated
Sus_scrofa___GAN	2.27807	6.37953	43.7986	7.26254e-07	0.000133071	3	4	Up-regulated
Sus_scrofa___NMI	5.81976	1.10382	41.6497	7.2989e-07	0.000133071	3	4	Up-regulated
Sus_scrofa___ASAP1	1.2891	7.77033	43.7543	7.32109e-07	0.000133071	3	4	Up-regulated
Sus_scrofa___PARP14	8.18272	3.96945	43.4437	7.33761e-07	0.000133071	3	4	Up-regulated
Sus_scrofa___ENSSSCG00000015390	4.43119	0.0264902	40.466	8.03795e-07	0.000144605	3	4	Up-regulated
Sus_scrofa___ENSSSCG00000001229	8.24172	4.97474	42.7875	8.14692e-07	0.000144605	3	4	Up-regulated
Sus_scrofa___WSB2	1.51885	5.94104	43.0995	8.25175e-07	0.000145434	3	4	Up-regulated
Sus_scrofa___ENSSSCG00000011729	2.07798	7.00088	42.8992	8.56132e-07	0.000148867	3	4	Up-regulated
Sus_scrofa___STAT3	1.91094	7.72586	42.8965	8.5655e-07	0.000148867	3	4	Up-regulated
Sus_scrofa___UCHL1	4.55632	-0.968688	36.7635	8.75561e-07	0.000151122	3	4	Up-regulated
Sus_scrofa___ISG15	13.1824	5.94499	40.2971	8.85776e-07	0.000151753	3	4	Up-regulated
Sus_scrofa___S100Z	4.91654	-1.8368	34.7443	8.91344e-07	0.000151753	3	4	Up-regulated
Sus_scrofa___ADM	5.54969	1.59001	41.0793	9.19948e-07	0.000155564	3	4	Up-regulated
Sus_scrofa___H2AW	5.36888	-2.05042	34.698	9.4171e-07	0.000158176	3	4	Up-regulated
Sus_scrofa___ENSSSCG00000025593	6.49459	1.44514	38.1406	9.69962e-07	0.000161835	3	4	Up-regulated
Sus_scrofa___MAGI1	2.51004	8.73099	41.99	1.0134e-06	0.000167962	3	4	Up-regulated
Sus_scrofa___UVRAG	1.47066	8.51526	41.9432	1.02229e-06	0.000168321	3	4	Up-regulated
Sus_scrofa___PARP3	1.92761	4.55683	41.7967	1.05111e-06	0.000171936	3	4	Up-regulated
Sus_scrofa___KLF10	4.76803	2.41908	41.8229	1.06696e-06	0.000173394	3	4	Up-regulated
Sus_scrofa___MEGF9	1.68072	3.8196	41.5468	1.10183e-06	0.000177811	3	4	Up-regulated
Sus_scrofa___RSAD2	15.446	6.15516	45.2753	1.10835e-06	0.000177811	3	4	Up-regulated
Sus_scrofa___ENSSSCG00000006395	3.56116	2.42659	41.5535	1.11668e-06	0.000178007	3	4	Up-regulated
Sus_scrofa___WSB1	2.19024	7.2623	41.1741	1.18139e-06	0.00018713	3	4	Up-regulated
Sus_scrofa___SUSD1	1.9525	4.33473	40.9603	1.23059e-06	0.000193698	3	4	Up-regulated
Sus_scrofa___DDC	3.62277	1.13725	40.9199	1.28941e-06	0.00019972	3	4	Up-regulated
Sus_scrofa___PSMB9	5.5148	2.02358	40.5539	1.29279e-06	0.00019972	3	4	Up-regulated
Sus_scrofa___ME1	2.15197	5.30121	40.3895	1.37187e-06	0.000209301	3	4	Up-regulated
Sus_scrofa___SH3RF2	3.61031	4.70436	40.3204	1.39076e-06	0.000209301	3	4	Up-regulated
Sus_scrofa___ENSSSCG00000007735	1.5115	6.53366	40.2847	1.39959e-06	0.000209301	3	4	Up-regulated
Sus_scrofa___TLL2	3.1104	4.04286	40.2861	1.40058e-06	0.000209301	3	4	Up-regulated
Sus_scrofa___CMPK2	12.3317	4.19575	40.8649	1.40557e-06	0.000209301	3	4	Up-regulated
Sus_scrofa___NFKB1	1.12325	7.37825	40.1494	1.43644e-06	0.000211469	3	4	Up-regulated
Sus_scrofa___RIT1	2.31753	2.11558	40.0378	1.4767e-06	0.000216124	3	4	Up-regulated
Sus_scrofa___CDIN1	1.22524	7.24037	39.8503	1.52169e-06	0.000221415	3	4	Up-regulated
Sus_scrofa___LONRF3	5.07322	5.2679	39.6358	1.58731e-06	0.000227003	3	4	Up-regulated
Sus_scrofa___MIDN	2.42047	4.3373	39.4922	1.63161e-06	0.000232013	3	4	Up-regulated
Papio_anubis_DES	4.96906	-1.93908	33.8601	1.66467e-06	0.000235377	3	4	Up-regulated
Sus_scrofa___NPAS3	2.58549	6.64087	39.3244	1.68523e-06	0.000235924	3	4	Up-regulated
Sus_scrofa___ENSSSCG00000042730	3.93988	-0.875031	35.0298	1.68739e-06	0.000235924	3	4	Up-regulated
Sus_scrofa___THOC6	3.27204	4.32576	39.1753	1.73585e-06	0.000240017	3	4	Up-regulated
Sus_scrofa___HK2	5.27008	7.49951	39.1002	1.76105e-06	0.000242164	3	4	Up-regulated
Sus_scrofa___ENSSSCG00000028691	3.10007	2.50916	38.9774	1.83134e-06	0.000249092	3	4	Up-regulated
Sus_scrofa___PRXL2A	3.93683	-1.31326	32.0977	1.89191e-06	0.000255939	3	4	Up-regulated
Sus_scrofa___IGF2BP3	1.60624	6.70455	38.7036	1.90314e-06	0.000256075	3	4	Up-regulated
Sus_scrofa___VPS37C	1.42424	4.21609	38.3872	2.02641e-06	0.000271204	3	4	Up-regulated
Sus_scrofa___TMCC3	3.54735	3.91203	38.2153	2.09814e-06	0.00027931	3	4	Up-regulated
Sus_scrofa___TENT5B	4.39551	1.35174	37.6304	2.19254e-06	0.000290332	3	4	Up-regulated
Sus_scrofa___PFKP	2.30008	4.2968	37.9542	2.20856e-06	0.000290914	3	4	Up-regulated
Sus_scrofa___ENSSSCG00000010448	2.08957	4.49945	37.8751	2.24336e-06	0.00029242	3	4	Up-regulated
Sus_scrofa___NRCAM	3.5679	6.17292	37.7412	2.30421e-06	0.000298481	3	4	Up-regulated
Sus_scrofa___TSKU	2.6983	-0.707387	36.1236	2.32346e-06	0.000298481	3	4	Up-regulated
Sus_scrofa___IFIT5	4.01107	4.34342	37.6056	2.36919e-06	0.000302519	3	4	Up-regulated
Sus_scrofa___INHBA	7.06426	2.0486	36.5114	2.38749e-06	0.000303308	3	4	Up-regulated
Sus_scrofa___RPL37A	3.96917	4.11579	37.5007	2.42047e-06	0.000305945	3	4	Up-regulated
Sus_scrofa___PDCD4	2.46931	6.48071	37.3525	2.4906e-06	0.000313227	3	4	Up-regulated
Sus_scrofa___B2M	3.20139	6.4098	36.875	2.7431e-06	0.000334885	3	4	Up-regulated
Sus_scrofa___TLE3	4.24914	3.5412	36.8489	2.7802e-06	0.000337144	3	4	Up-regulated
Sus_scrofa___FJX1	4.23214	-0.355166	34.7622	2.78854e-06	0.000337144	3	4	Up-regulated
Sus_scrofa___C9orf72	2.60759	4.62414	36.7649	2.80566e-06	0.000337582	3	4	Up-regulated
Sus_scrofa___PLEKHA4	3.95047	4.02883	36.7146	2.84013e-06	0.000338809	3	4	Up-regulated
Sus_scrofa___PIM1	7.04282	2.53799	34.4672	2.93253e-06	0.000344566	3	4	Up-regulated
Sus_scrofa___DDAH1	2.74537	5.89701	36.4472	2.99296e-06	0.000350023	3	4	Up-regulated
Sus_scrofa___RHBDD1	1.71062	5.18043	36.3839	3.03203e-06	0.000352943	3	4	Up-regulated
Sus_scrofa___SRXN1	4.83718	2.86344	36.4058	3.04878e-06	0.000353249	3	4	Up-regulated
Sus_scrofa___PSMD14	1.48583	6.58832	36.1494	3.18127e-06	0.000366901	3	4	Up-regulated
Sus_scrofa___WDR54	3.18164	-0.645975	32.7042	3.22324e-06	0.000370037	3	4	Up-regulated
Sus_scrofa___LGALS3BP	8.74046	2.25017	32.7991	3.26383e-06	0.000372985	3	4	Up-regulated
Sus_scrofa___DUSP4	5.70508	1.92145	35.6352	3.31831e-06	0.000377488	3	4	Up-regulated
Sus_scrofa___MYORG	1.57813	6.06444	35.8123	3.41019e-06	0.000384301	3	4	Up-regulated
Sus_scrofa___ENO1	1.71339	7.13343	35.7206	3.47547e-06	0.000385574	3	4	Up-regulated
Sus_scrofa___SERPINB2	3.88091	6.23254	35.712	3.48183e-06	0.000385574	3	4	Up-regulated
Sus_scrofa___GHSR	5.21411	2.74154	35.7803	3.53937e-06	0.000388109	3	4	Up-regulated
Sus_scrofa___TXNRD1	1.63848	6.66202	35.5955	3.56676e-06	0.000388109	3	4	Up-regulated
Sus_scrofa___YBX2	3.11218	1.09622	35.6831	3.63292e-06	0.000391901	3	4	Up-regulated
Sus_scrofa___MAN1A1	3.97527	2.65369	35.5763	3.65097e-06	0.000392158	3	4	Up-regulated
Sus_scrofa___CCL5	6.853	3.32953	35.2377	3.89369e-06	0.000412733	3	4	Up-regulated
Sus_scrofa___NES	4.87175	3.78254	35.1915	3.90849e-06	0.000412733	3	4	Up-regulated
Sus_scrofa___ANKRD2	5.38534	4.36212	34.8855	4.14763e-06	0.000436146	3	4	Up-regulated
Sus_scrofa___CCL4	6.09692	1.2845	33.5653	4.17405e-06	0.000437088	3	4	Up-regulated
Sus_scrofa___ACTG1	2.15097	8.29355	34.7174	4.28568e-06	0.000445772	3	4	Up-regulated
Sus_scrofa___FLRT2	7.26914	4.58404	34.7693	4.30535e-06	0.000445772	3	4	Up-regulated
Sus_scrofa___UCK2	2.60136	7.77487	34.6867	4.31349e-06	0.000445772	3	4	Up-regulated
Sus_scrofa___FUT11	1.73806	2.96285	34.6779	4.32823e-06	0.000445772	3	4	Up-regulated
Sus_scrofa___NPPB	7.67067	6.88332	34.5061	4.48764e-06	0.000459809	3	4	Up-regulated
Sus_scrofa___DUSP5	6.98597	3.29412	33.1336	4.50127e-06	0.000459809	3	4	Up-regulated
Sus_scrofa___ENSSSCG00000033786	2.60382	7.30623	34.3098	4.67142e-06	0.00047525	3	4	Up-regulated
Sus_scrofa___SPIDR	3.04559	6.50974	34.154	4.82903e-06	0.000487323	3	4	Up-regulated
Sus_scrofa___ENSSSCG00000009338	1.81786	10.4802	34.0498	4.9371e-06	0.000496229	3	4	Up-regulated
Sus_scrofa___ENSSSCG00000009633	3.0061	3.80117	34.0069	4.98786e-06	0.000497252	3	4	Up-regulated
Sus_scrofa___KLF4	3.54964	1.40737	34.1179	5.00037e-06	0.000497252	3	4	Up-regulated
Sus_scrofa___CCDC3	3.29207	2.57884	33.8972	5.12587e-06	0.000507056	3	4	Up-regulated
Sus_scrofa___SLC37A2	2.48901	1.92603	33.6976	5.38762e-06	0.000526703	3	4	Up-regulated
Sus_scrofa___PFKFB3	4.73619	4.88988	33.6165	5.46573e-06	0.000530007	3	4	Up-regulated
Sus_scrofa___ENSSSCG00000012006	3.65132	4.43398	33.5779	5.46592e-06	0.000530007	3	4	Up-regulated
Sus_scrofa___PLOD1	1.86353	4.59794	33.5189	5.53321e-06	0.000532614	3	4	Up-regulated
Sus_scrofa___GPNMB	1.99265	4.48156	33.3677	5.71652e-06	0.000546331	3	4	Up-regulated
Sus_scrofa___BNIP3L	1.6056	5.28781	33.3644	5.71959e-06	0.000546331	3	4	Up-regulated
Sus_scrofa___ENSSSCG00000034570	12.5603	6.03303	30.4507	5.74329e-06	0.000546331	3	4	Up-regulated
Sus_scrofa___ENSSSCG00000023324	1.06008	7.24882	33.2514	5.86071e-06	0.000553303	3	4	Up-regulated
Sus_scrofa___ENSSSCG00000015645	1.73985	6.02734	33.115	6.03648e-06	0.000565824	3	4	Up-regulated
Sus_scrofa___TUFT1	2.7426	2.01972	33.0201	6.2437e-06	0.000578745	3	4	Up-regulated
Sus_scrofa___RPL31	2.42102	6.41371	32.9143	6.30553e-06	0.00058232	3	4	Up-regulated
Sus_scrofa___TRANK1	3.66557	5.50319	32.5473	6.83258e-06	0.00062112	3	4	Up-regulated
Sus_scrofa___SPECC1	2.63884	6.12833	32.5353	6.84977e-06	0.00062112	3	4	Up-regulated
Sus_scrofa___FBXO7	1.54637	6.33381	32.4927	6.91386e-06	0.000624668	3	4	Up-regulated
Sus_scrofa___CAMTA1	1.14983	7.71785	32.4368	6.99927e-06	0.00063011	3	4	Up-regulated
Sus_scrofa___ENSSSCG00000002850	5.72864	-1.5229	27.8169	7.05229e-06	0.000632608	3	4	Up-regulated
Sus_scrofa___CYP51A1	1.49002	2.85797	32.3101	7.20906e-06	0.000640797	3	4	Up-regulated
Sus_scrofa___CDC14A	2.18749	7.60448	32.2324	7.32116e-06	0.000647444	3	4	Up-regulated
Sus_scrofa___S100A11	4.5963	0.465303	30.0965	7.48638e-06	0.00065741	3	4	Up-regulated
Sus_scrofa___NTN1	3.2396	2.26268	32.1013	7.58806e-06	0.000664008	3	4	Up-regulated
Sus_scrofa___KDM3A	1.66549	6.75452	32.027	7.66088e-06	0.000666734	3	4	Up-regulated
Sus_scrofa___ENSSSCG00000042129	3.23433	-1.93496	26.1407	7.67748e-06	0.000666734	3	4	Up-regulated
Sus_scrofa___PEX7	1.25738	5.66297	32.0046	7.69913e-06	0.000666734	3	4	Up-regulated
Sus_scrofa___SP110	5.3375	3.03679	32.0522	7.73682e-06	0.000667687	3	4	Up-regulated
Sus_scrofa___MORC3	1.83908	5.77665	31.9581	7.77875e-06	0.000668999	3	4	Up-regulated
Sus_scrofa___RGS1	4.3705	-1.59067	26.079	7.97233e-06	0.0006833	3	4	Up-regulated
Sus_scrofa___ENSSSCG00000045769	4.53151	3.28088	31.8544	8.04181e-06	0.000686902	3	4	Up-regulated
Sus_scrofa___SESN2	4.44309	3.56075	31.6824	8.35078e-06	0.000708458	3	4	Up-regulated
Sus_scrofa___UBD	5.66787	0.251854	26.3946	8.46497e-06	0.00071331	3	4	Up-regulated
Sus_scrofa___MFRP	3.39526	0.633757	31.5739	8.80565e-06	0.000737053	3	4	Up-regulated
Sus_scrofa___GAPDH	2.52293	5.95304	31.3294	8.94871e-06	0.000744232	3	4	Up-regulated
Sus_scrofa___GUCY1B1	4.47106	0.719729	30.6989	8.95089e-06	0.000744232	3	4	Up-regulated
Sus_scrofa___IGF2BP2	1.77915	6.83996	31.2521	9.1048e-06	0.000754523	3	4	Up-regulated
Sus_scrofa___DYNC1H1	1.18587	6.02674	31.1348	9.34808e-06	0.000767064	3	4	Up-regulated
Sus_scrofa___DDX60	7.93695	5.97598	31.0588	9.54572e-06	0.000774938	3	4	Up-regulated
Sus_scrofa___REC8	4.75111	0.779066	30.4246	9.5679e-06	0.000774938	3	4	Up-regulated
Sus_scrofa___MYO5A	0.957391	7.30423	30.9386	9.77075e-06	0.000788815	3	4	Up-regulated
Sus_scrofa___ENSSSCG00000016646	2.44111	8.4138	30.9098	9.83443e-06	0.000788866	3	4	Up-regulated
Sus_scrofa___SLC1A5	5.31736	-1.12164	27.8285	1.00777e-05	0.000803252	3	4	Up-regulated
Sus_scrofa___ARAP2	4.01424	1.36576	30.9086	1.0078e-05	0.000803252	3	4	Up-regulated
Sus_scrofa___MLLT11	2.13593	3.97847	30.6634	1.04048e-05	0.000824053	3	4	Up-regulated
Sus_scrofa___SERPINB8	1.51953	3.06001	30.6321	1.04847e-05	0.000826059	3	4	Up-regulated
Sus_scrofa___ENSSSCG00000007692	1.29178	6.27402	30.4598	1.08917e-05	0.000853426	3	4	Up-regulated
Sus_scrofa___F2RL1	3.55359	0.854691	30.5769	1.09143e-05	0.000853426	3	4	Up-regulated
Sus_scrofa___GPA33	2.98326	4.56514	30.4395	1.09462e-05	0.000853426	3	4	Up-regulated
Sus_scrofa___TNFAIP3	3.23083	2.18195	30.3234	1.13156e-05	0.000876764	3	4	Up-regulated
Sus_scrofa___ENSSSCG00000038144	2.93677	8.35206	30.1911	1.15812e-05	0.000891454	3	4	Up-regulated
Sus_scrofa___KATNBL1	3.43801	8.75345	30.1176	1.17781e-05	0.000898431	3	4	Up-regulated
Sus_scrofa___MYEF2	2.42357	2.93136	30.1117	1.18106e-05	0.000898431	3	4	Up-regulated
Sus_scrofa___YWHAH	1.83883	4.99415	30.0189	1.20493e-05	0.000913809	3	4	Up-regulated
Sus_scrofa___ENSSSCG00000008767	4.76923	-0.514457	27.1368	1.23137e-05	0.000926657	3	4	Up-regulated
Sus_scrofa___BAG3	2.09668	6.801	29.9184	1.23298e-05	0.000926657	3	4	Up-regulated
Sus_scrofa___DENND3	2.77168	3.15861	29.7889	1.27195e-05	0.00095309	3	4	Up-regulated
Sus_scrofa___HSPB6	2.82965	4.86771	29.7403	1.28488e-05	0.000959898	3	4	Up-regulated
Sus_scrofa___G6PD	1.81882	2.18806	29.6873	1.30768e-05	0.000974028	3	4	Up-regulated
Sus_scrofa___PARP12	7.33651	5.69452	29.6408	1.31811e-05	0.000978882	3	4	Up-regulated
Sus_scrofa___IRF7	5.62835	1.88723	29.5643	1.36171e-05	0.00099648	3	4	Up-regulated
Sus_scrofa___SYT11	2.55039	2.57951	29.3437	1.41196e-05	0.00102335	3	4	Up-regulated
Sus_scrofa___CDCP1	1.96866	4.40835	29.3253	1.4148e-05	0.00102335	3	4	Up-regulated
Sus_scrofa___KDM4C	1.12898	8.55464	29.3038	1.42163e-05	0.00102473	3	4	Up-regulated
Sus_scrofa___IRAK3	2.34655	3.83234	29.2961	1.42488e-05	0.00102473	3	4	Up-regulated
Sus_scrofa___ENSSSCG00000041254	2.79607	-0.769772	27.2989	1.4846e-05	0.00105554	3	4	Up-regulated
Sus_scrofa___ERAP1	1.68582	3.2426	29.0391	1.5142e-05	0.00107221	3	4	Up-regulated
Sus_scrofa___CHORDC1	1.02365	6.63241	29.0186	1.51964e-05	0.00107221	3	4	Up-regulated
Sus_scrofa___ENSSSCG00000012427	4.93478	2.39572	29.0727	1.52089e-05	0.00107221	3	4	Up-regulated
Sus_scrofa___GPR137B	2.10468	2.60633	28.9738	1.53903e-05	0.00108195	3	4	Up-regulated
Sus_scrofa___PSMB8	8.8157	1.32348	28.984	1.54712e-05	0.00108459	3	4	Up-regulated
Sus_scrofa___ENSSSCG00000034015	2.80634	6.32981	28.8404	1.58459e-05	0.00110016	3	4	Up-regulated
Sus_scrofa___ANKRD37	3.09843	2.62561	28.8819	1.58692e-05	0.00110016	3	4	Up-regulated
Sus_scrofa___OASL	4.0421	1.76446	28.892	1.60849e-05	0.00111204	3	4	Up-regulated
Papio_anubis_ELOA	6.32534	1.07407	26.5093	1.61627e-05	0.00111277	3	4	Up-regulated
Sus_scrofa___SLC10A7	1.19872	6.6728	28.7407	1.62218e-05	0.00111277	3	4	Up-regulated
Sus_scrofa___SREBF2	1.43011	5.26756	28.7391	1.62289e-05	0.00111277	3	4	Up-regulated
Sus_scrofa___PARP9	5.82771	3.69053	28.6494	1.67287e-05	0.00114079	3	4	Up-regulated
Sus_scrofa___SEPTIN11	2.15478	5.50613	28.559	1.69335e-05	0.00115162	3	4	Up-regulated
Sus_scrofa___CDKN1A	2.7536	3.47845	28.429	1.74753e-05	0.00118524	3	4	Up-regulated
Sus_scrofa___DNAJB5	1.56843	4.97736	28.3718	1.77024e-05	0.00119417	3	4	Up-regulated
Sus_scrofa___RASSF1	2.48723	4.01136	28.3312	1.78798e-05	0.00119967	3	4	Up-regulated
Sus_scrofa___ENSSSCG00000046153	2.8109	5.32011	28.2682	1.81437e-05	0.0012026	3	4	Up-regulated
Sus_scrofa___ESAM	4.04552	-0.909352	26.237	1.81561e-05	0.0012026	3	4	Up-regulated
Sus_scrofa___TMEM238	4.42133	-1.90248	23.9357	1.81637e-05	0.0012026	3	4	Up-regulated
Sus_scrofa___HMGCR	1.6722	2.78469	28.2452	1.82694e-05	0.00120641	3	4	Up-regulated
Sus_scrofa___MAFG	2.01378	2.80729	28.1482	1.86981e-05	0.00122317	3	4	Up-regulated
Sus_scrofa___SAMD4A	1.41279	11.0683	28.14	1.87045e-05	0.00122317	3	4	Up-regulated
Sus_scrofa___ENSSSCG00000047500	2.1116	1.67536	28.1069	1.90066e-05	0.00123874	3	4	Up-regulated
Sus_scrofa___CAVIN3	5.50318	-1.68237	25.1882	1.9848e-05	0.00127042	3	4	Up-regulated
Sus_scrofa___ENSSSCG00000035992	2.15255	7.28192	27.769	2.0442e-05	0.0012981	3	4	Up-regulated
Sus_scrofa___ENC1	4.48262	2.04045	27.8215	2.04878e-05	0.0012981	3	4	Up-regulated
Sus_scrofa___CST3	5.38272	-0.252608	25.5815	2.07176e-05	0.00130276	3	4	Up-regulated
Sus_scrofa___BACE2	1.64232	7.0675	27.6694	2.09377e-05	0.00131267	3	4	Up-regulated
Sus_scrofa___IFIH1	7.6435	6.27123	27.6408	2.1127e-05	0.00131856	3	4	Up-regulated
Sus_scrofa___NEMP2	1.63608	4.56363	27.6053	2.12667e-05	0.00132398	3	4	Up-regulated
Sus_scrofa___BCL6	1.48051	4.77107	27.5859	2.13658e-05	0.00132685	3	4	Up-regulated
Sus_scrofa___ISG12(A)	10.0813	5.81939	26.9498	2.19301e-05	0.00135517	3	4	Up-regulated
Sus_scrofa___NETO2	2.4199	2.4503	27.4547	2.2137e-05	0.00136305	3	4	Up-regulated
Sus_scrofa___UBQLN1	0.997368	6.59097	27.367	2.2524e-05	0.00137338	3	4	Up-regulated
Sus_scrofa___TNNC2	3.40104	-0.817935	25.9498	2.26393e-05	0.00137523	3	4	Up-regulated
Sus_scrofa___TEAD4	1.52944	6.21307	27.2432	2.32109e-05	0.00140654	3	4	Up-regulated
Sus_scrofa___ENSSSCG00000022246	4.57736	-0.458803	24.0782	2.40244e-05	0.00144187	3	4	Up-regulated
Sus_scrofa___NPC2	2.30706	1.50535	27.1209	2.42397e-05	0.00144784	3	4	Up-regulated
Sus_scrofa___HLCS	1.28869	5.95548	27.0345	2.44209e-05	0.00145519	3	4	Up-regulated
Sus_scrofa___TTC39A	2.85386	3.70263	26.9768	2.47845e-05	0.00146986	3	4	Up-regulated
Sus_scrofa___ERBB3	2.10341	3.72953	26.9635	2.48594e-05	0.00147082	3	4	Up-regulated
Sus_scrofa___ENSSSCG00000005453	2.63898	3.27023	26.9159	2.51763e-05	0.00148605	3	4	Up-regulated
Sus_scrofa___PDE6D	1.50028	5.1766	26.8759	2.53864e-05	0.00149493	3	4	Up-regulated
Sus_scrofa___BMP4	2.04911	3.46864	26.7506	2.61961e-05	0.00152823	3	4	Up-regulated
Sus_scrofa___TAC4	2.69292	-0.20147	26.6245	2.6509e-05	0.00153931	3	4	Up-regulated
Sus_scrofa___TRIOBP	1.6468	4.11818	26.6782	2.66542e-05	0.00154415	3	4	Up-regulated
Sus_scrofa___INPP5F	2.38903	7.61674	26.5685	2.73751e-05	0.00158225	3	4	Up-regulated
Papio_anubis_ENSPANG00000008041	5.21496	0.158387	24.8167	2.79028e-05	0.00160904	3	4	Up-regulated
Sus_scrofa___USP18	6.19098	5.94493	26.4568	2.81509e-05	0.00161961	3	4	Up-regulated
Sus_scrofa___TRIB1	2.91792	5.25316	26.3733	2.8728e-05	0.00164432	3	4	Up-regulated
Sus_scrofa___AKAP7	2.2318	6.1051	26.3035	2.92275e-05	0.00166244	3	4	Up-regulated
Papio_anubis_VEGFD	6.08573	-2.26855	22.8278	2.96244e-05	0.0016812	3	4	Up-regulated
Sus_scrofa___ENSSSCG00000022322	2.02453	5.73538	26.2004	2.9984e-05	0.00169125	3	4	Up-regulated
Sus_scrofa___ARNTL	2.40374	6.56614	26.1693	3.02159e-05	0.00169518	3	4	Up-regulated
Papio_anubis_U5-10	3.25397	-0.832587	23.8019	3.02242e-05	0.00169518	3	4	Up-regulated
Sus_scrofa___NPDC1	4.64341	-1.48918	23.3614	3.02772e-05	0.00169518	3	4	Up-regulated
Sus_scrofa___ENSSSCG00000015795	2.61957	2.57386	26.1225	3.06609e-05	0.00171284	3	4	Up-regulated
Sus_scrofa___MYO1A	2.7768	-1.39219	23.5167	3.12581e-05	0.00173843	3	4	Up-regulated
Sus_scrofa___ENSSSCG00000011559	1.08504	4.75337	26.0109	3.1434e-05	0.00174049	3	4	Up-regulated
Sus_scrofa___CD44	2.23688	7.17554	25.8733	3.25287e-05	0.00179659	3	4	Up-regulated
Sus_scrofa___E2F6	1.01773	5.70184	25.8569	3.26626e-05	0.00179659	3	4	Up-regulated
Papio_anubis_PSMC3	6.41248	-2.42991	28.0056	3.2928e-05	0.00180721	3	4	Up-regulated
Sus_scrofa___BATF2	3.99281	-0.210014	23.6311	3.31626e-05	0.0018144	3	4	Up-regulated
Sus_scrofa___EEA1	1.18451	7.44149	25.723	3.37758e-05	0.00182572	3	4	Up-regulated
Sus_scrofa___C4orf46	3.23148	1.8921	25.7197	3.40386e-05	0.00183201	3	4	Up-regulated
Sus_scrofa___RPS6KA3	1.28405	7.60433	25.6541	3.43641e-05	0.00184556	3	4	Up-regulated
Sus_scrofa___TSPAN14	3.70647	0.0105846	25.3919	3.45075e-05	0.00184929	3	4	Up-regulated
Sus_scrofa___NFKBIE	2.93033	-0.695549	24.6511	3.47525e-05	0.00185844	3	4	Up-regulated
Sus_scrofa___IGFBP2	6.54692	3.93506	25.5498	3.49545e-05	0.00186526	3	4	Up-regulated
Sus_scrofa___ENSSSCG00000034610	3.35877	4.06977	25.5095	3.56554e-05	0.00189057	3	4	Up-regulated
Sus_scrofa___EIF2AK2	5.48254	8.13562	25.4298	3.63603e-05	0.00192107	3	4	Up-regulated
Sus_scrofa___MOV10	3.17684	3.72775	25.4309	3.63842e-05	0.00192107	3	4	Up-regulated
Sus_scrofa___DPP3	1.8792	3.14833	25.4098	3.65834e-05	0.00192255	3	4	Up-regulated
Sus_scrofa___DHX58	6.69242	2.71874	25.2625	3.66427e-05	0.00192255	3	4	Up-regulated
Sus_scrofa___PTP4A2	1.12176	8.20647	25.38	3.68203e-05	0.00192783	3	4	Up-regulated
Papio_anubis_PTP4A2	3.31089	-2.08238	22.6739	3.75575e-05	0.00195745	3	4	Up-regulated
Sus_scrofa___INSIG1	2.58536	1.44277	25.3448	3.76455e-05	0.00195745	3	4	Up-regulated
Sus_scrofa___MDM2	1.44957	6.25843	25.2429	3.81195e-05	0.00197519	3	4	Up-regulated
Sus_scrofa___DTX3L	5.54905	3.24224	25.2454	3.85325e-05	0.00199246	3	4	Up-regulated
Sus_scrofa___ACOXL	2.79423	2.85702	25.1964	3.86781e-05	0.00199587	3	4	Up-regulated
Sus_scrofa___NFYA	1.06889	4.00518	25.1712	3.88274e-05	0.00199786	3	4	Up-regulated
Sus_scrofa___EIF2AK3	0.954975	6.75017	25.1653	3.88763e-05	0.00199786	3	4	Up-regulated
Sus_scrofa___ADAMTS1	4.45279	5.59599	25.1308	3.92227e-05	0.00200885	3	4	Up-regulated
Sus_scrofa___ENSSSCG00000016426	2.02267	6.77676	25.1276	3.92508e-05	0.00200885	3	4	Up-regulated
Sus_scrofa___SMPX	1.46755	7.82094	25.1089	3.94372e-05	0.00201428	3	4	Up-regulated
Sus_scrofa___OSMR	2.59573	5.08658	25.0953	3.95799e-05	0.00201516	3	4	Up-regulated
Sus_scrofa___PHC3	0.996092	8.05353	25.0911	3.96156e-05	0.00201516	3	4	Up-regulated
Sus_scrofa___SEMA3B	2.53354	-0.475156	24.8739	3.9917e-05	0.00202637	3	4	Up-regulated
Sus_scrofa___HSPA13	1.96242	2.52917	25.0428	4.01736e-05	0.00203221	3	4	Up-regulated
Sus_scrofa___ROBO1	3.82174	6.87516	25.0341	4.01943e-05	0.00203221	3	4	Up-regulated
Sus_scrofa___TNFRSF1B	4.12719	-1.57163	21.2301	4.09475e-05	0.00205782	3	4	Up-regulated
Papio_anubis_MYL2	4.26164	-0.878087	22.4436	4.19455e-05	0.00209535	3	4	Up-regulated
Sus_scrofa___CTSD	1.72579	4.60849	24.7842	4.28456e-05	0.00213605	3	4	Up-regulated
Sus_scrofa___WWC1	3.05385	5.92599	24.7747	4.29467e-05	0.00213629	3	4	Up-regulated
Sus_scrofa___TRIM56	2.77627	2.18731	24.762	4.34424e-05	0.00214444	3	4	Up-regulated
Sus_scrofa___ENSSSCG00000022032	1.59279	7.14721	24.564	4.53287e-05	0.00222004	3	4	Up-regulated
Sus_scrofa___ENSSSCG00000010370	4.28847	-1.4503	21.1237	4.64603e-05	0.00226659	3	4	Up-regulated
Sus_scrofa___GM2A	2.54022	2.28147	24.452	4.69559e-05	0.00228226	3	4	Up-regulated
Sus_scrofa___PRRG4	3.9073	-0.0342018	23.4927	4.73046e-05	0.00229436	3	4	Up-regulated
Sus_scrofa___CEBPD	8.93071	1.6989	24.5832	4.92598e-05	0.00236627	3	4	Up-regulated
Sus_scrofa___PSMB2	1.04744	7.03188	24.2071	4.97017e-05	0.00238292	3	4	Up-regulated
Sus_scrofa___SLC26A2	1.51834	2.03568	24.1879	5.01369e-05	0.00239919	3	4	Up-regulated
Sus_scrofa___ENSSSCG00000004261	5.51891	-0.821881	23.3727	5.07176e-05	0.00241968	3	4	Up-regulated
Sus_scrofa___PCYT1B	1.73191	2.53109	24.0807	5.14614e-05	0.00244793	3	4	Up-regulated
Sus_scrofa___IFI44L	5.76086	6.37914	24.0673	5.15467e-05	0.00244793	3	4	Up-regulated
Sus_scrofa___NOL3	2.07434	2.54101	24.0281	5.22146e-05	0.00247475	3	4	Up-regulated
Sus_scrofa___PTP4A1	1.91011	5.12328	23.9882	5.26118e-05	0.00248437	3	4	Up-regulated
Sus_scrofa___DENND5B	0.948005	10.0146	23.9549	5.30675e-05	0.00249687	3	4	Up-regulated
Sus_scrofa___RBM18	1.05477	4.6305	23.9523	5.31095e-05	0.00249687	3	4	Up-regulated
Sus_scrofa___IFI44	8.25053	6.24775	23.9621	5.31758e-05	0.00249687	3	4	Up-regulated
Sus_scrofa___FLNC	2.07907	8.15296	23.9348	5.33459e-05	0.00250016	3	4	Up-regulated
Sus_scrofa___ATP1A2	2.46839	3.92302	23.9273	5.34717e-05	0.00250138	3	4	Up-regulated
Sus_scrofa___PML	3.80512	5.7423	23.8671	5.43021e-05	0.00253324	3	4	Up-regulated
Sus_scrofa___TRIM21	3.75516	3.73749	23.8604	5.44406e-05	0.00253324	3	4	Up-regulated
Sus_scrofa___LMNTD1	2.46975	10.3439	23.8505	5.4533e-05	0.00253324	3	4	Up-regulated
Sus_scrofa___ENSSSCG00000003079	4.0471	4.01697	23.8436	5.46846e-05	0.00253443	3	4	Up-regulated
Papio_anubis_ENSPANG00000017966	3.30327	0.954209	23.8483	5.53663e-05	0.00255655	3	4	Up-regulated
Sus_scrofa___POPDC2	1.41344	5.96405	23.667	5.72153e-05	0.00261739	3	4	Up-regulated
Sus_scrofa___ENSSSCG00000039582	1.5193	5.22559	23.6608	5.73114e-05	0.00261739	3	4	Up-regulated
Sus_scrofa___ENSSSCG00000003421	1.90639	3.39394	23.5968	5.83153e-05	0.0026344	3	4	Up-regulated
Sus_scrofa___ADRM1	1.37864	2.8095	23.5508	5.90578e-05	0.00265357	3	4	Up-regulated
Sus_scrofa___ZC3HAV1	3.86278	5.42151	23.5064	5.96858e-05	0.00266742	3	4	Up-regulated
Sus_scrofa___CTSB	1.86143	5.15021	23.486	6.00035e-05	0.00267684	3	4	Up-regulated
Sus_scrofa___SPHK1	4.1485	0.0809145	23.2475	6.04733e-05	0.00268345	3	4	Up-regulated
Sus_scrofa___PYGO1	1.92001	2.16427	23.4363	6.09741e-05	0.00269611	3	4	Up-regulated
Sus_scrofa___HIPK2	1.64765	10.1035	23.3009	6.30034e-05	0.00277115	3	4	Up-regulated
Sus_scrofa___BAMBI	2.57891	-0.609268	22.3183	6.31299e-05	0.00277185	3	4	Up-regulated
Sus_scrofa___HERC6	7.66185	6.67184	23.2203	6.44149e-05	0.00280401	3	4	Up-regulated
Sus_scrofa___EPS15	0.956387	7.09045	23.2167	6.44227e-05	0.00280401	3	4	Up-regulated
Sus_scrofa___LRP2	2.31778	4.01499	23.1928	6.48547e-05	0.00281792	3	4	Up-regulated
Sus_scrofa___ENSSSCG00000031818	1.21168	4.95224	23.1284	6.59522e-05	0.00284984	3	4	Up-regulated
Sus_scrofa___KSR1	1.31268	6.38485	23.1268	6.59764e-05	0.00284984	3	4	Up-regulated
Sus_scrofa___ENSSSCG00000034802	7.25676	-1.48548	21.261	6.6045e-05	0.00284984	3	4	Up-regulated
Sus_scrofa___ADGRG6	2.93561	4.84502	23.1154	6.61842e-05	0.00285093	3	4	Up-regulated
Sus_scrofa___SLC36A4	1.37035	5.33577	23.0492	6.73534e-05	0.00288146	3	4	Up-regulated
Sus_scrofa___ZNF395	0.969653	6.65088	23.035	6.76058e-05	0.00288732	3	4	Up-regulated
Sus_scrofa___CYTH3	1.35964	7.12239	22.9816	6.85737e-05	0.00291369	3	4	Up-regulated
Sus_scrofa___LTBP4	4.3795	0.0596998	21.679	6.98395e-05	0.00294751	3	4	Up-regulated
Sus_scrofa___MTR	1.59246	5.7791	22.865	7.07395e-05	0.00296605	3	4	Up-regulated
Sus_scrofa___PSMF1	1.29122	7.05947	22.8516	7.09908e-05	0.00296605	3	4	Up-regulated
Sus_scrofa___LBR	2.84598	0.603049	22.9514	7.10729e-05	0.00296605	3	4	Up-regulated
Sus_scrofa___ZMAT3	1.99754	3.57957	22.8179	7.16754e-05	0.00298472	3	4	Up-regulated
Sus_scrofa___TMEM135	1.74865	8.87803	22.7942	7.20881e-05	0.00299196	3	4	Up-regulated
Sus_scrofa___ENSSSCG00000023436	2.21271	0.838103	22.8332	7.25449e-05	0.00300096	3	4	Up-regulated
Papio_anubis_ATP5MC3	5.23336	-1.85872	20.9921	7.27886e-05	0.00300607	3	4	Up-regulated
Sus_scrofa___ARSB	2.71049	0.759519	22.812	7.36881e-05	0.00303821	3	4	Up-regulated
Sus_scrofa___AK4	3.91055	3.4224	22.7328	7.39228e-05	0.00304287	3	4	Up-regulated
Sus_scrofa___RAB9B	2.19943	4.49236	22.6248	7.54464e-05	0.00309511	3	4	Up-regulated
Sus_scrofa___CYBRD1	3.34983	1.29845	22.6808	7.56867e-05	0.00309511	3	4	Up-regulated
Sus_scrofa___EIF1AX	1.18622	4.29978	22.5998	7.59549e-05	0.00310102	3	4	Up-regulated
Sus_scrofa___ENSSSCG00000000659	1.93206	2.28803	22.5886	7.63868e-05	0.00311357	3	4	Up-regulated
Sus_scrofa___PRDX6	2.35314	3.66699	22.5216	7.75846e-05	0.00313179	3	4	Up-regulated
Sus_scrofa___SH3PXD2A	1.70358	6.76132	22.4717	7.86068e-05	0.00316794	3	4	Up-regulated
Sus_scrofa___DOCK9	1.82765	5.87459	22.4544	7.89738e-05	0.00317761	3	4	Up-regulated
Sus_scrofa___DEK	1.03143	5.9727	22.4382	7.93192e-05	0.00318128	3	4	Up-regulated
Sus_scrofa___GSR	1.87284	5.60343	22.4144	7.9835e-05	0.00318701	3	4	Up-regulated
Sus_scrofa___CASK	1.18429	5.82447	22.4138	7.98439e-05	0.00318701	3	4	Up-regulated
Sus_scrofa___ENSSSCG00000032591	5.86234	-2.42198	20.0666	8.09597e-05	0.00322127	3	4	Up-regulated
Sus_scrofa___PANX1	3.65698	1.03617	22.4053	8.11181e-05	0.00322245	3	4	Up-regulated
Sus_scrofa___SLC25A13	0.916321	7.95556	22.324	8.18026e-05	0.00324449	3	4	Up-regulated
Sus_scrofa___PPP1R15A	2.34955	4.04406	22.2764	8.28815e-05	0.00327768	3	4	Up-regulated
Sus_scrofa___ADAR	2.18884	5.46715	22.2748	8.29014e-05	0.00327768	3	4	Up-regulated
Sus_scrofa___AGPAT4	1.56954	3.52237	22.2642	8.31779e-05	0.00328163	3	4	Up-regulated
Sus_scrofa___LLGL2	3.02524	-0.243868	22.0684	8.33028e-05	0.00328163	3	4	Up-regulated
Sus_scrofa___MTFR1	1.46241	4.76638	22.2531	8.33947e-05	0.00328163	3	4	Up-regulated
Sus_scrofa___GCNT3	3.883	5.09615	22.2269	8.39919e-05	0.00329969	3	4	Up-regulated
Sus_scrofa___DAB2	2.89346	3.67765	22.217	8.42491e-05	0.00329969	3	4	Up-regulated
Sus_scrofa___TRIM14	3.19415	0.30466	22.1805	8.58572e-05	0.00334263	3	4	Up-regulated
Sus_scrofa___CMTM8	2.99979	2.33895	22.1433	8.61392e-05	0.00334753	3	4	Up-regulated
Sus_scrofa___ENSSSCG00000006777	4.51873	0.761712	22.1369	8.79179e-05	0.00340773	3	4	Up-regulated
Sus_scrofa___SPRYD3	1.44123	2.78781	22.0605	8.79608e-05	0.00340773	3	4	Up-regulated
Sus_scrofa___SLC16A12	3.46213	2.25915	22.056	8.86537e-05	0.00342397	3	4	Up-regulated
Sus_scrofa___SHISA5	2.87316	2.3613	21.9714	9.04902e-05	0.00348952	3	4	Up-regulated
Sus_scrofa___SPAG1	1.43845	3.19071	21.9487	9.06344e-05	0.0034897	3	4	Up-regulated
Sus_scrofa___CTRC	2.49496	2.23455	21.8848	9.24449e-05	0.00354306	3	4	Up-regulated
Sus_scrofa___ENSSSCG00000045136	3.26665	-1.54226	19.6926	9.32405e-05	0.00356809	3	4	Up-regulated
Sus_scrofa___KPNA4	1.01363	7.15147	21.8157	9.39265e-05	0.00358696	3	4	Up-regulated
Sus_scrofa___NCAM1	1.74609	10.0838	21.812	9.40202e-05	0.00358696	3	4	Up-regulated
Sus_scrofa___SLC39A8	2.6677	-1.44665	20.1037	9.43412e-05	0.00358826	3	4	Up-regulated
Sus_scrofa___TMEM51	3.7992	0.729908	21.6629	9.6362e-05	0.00364882	3	4	Up-regulated
Sus_scrofa___LIPA	2.66169	6.09133	21.6479	9.83468e-05	0.00371801	3	4	Up-regulated
Sus_scrofa___ENSSSCG00000017146	3.61201	6.76868	21.5866	0.000100018	0.00375849	3	4	Up-regulated
Sus_scrofa___UBE2R2	1.14501	8.92795	21.5618	0.000100701	0.00377848	3	4	Up-regulated
Sus_scrofa___TBXAS1	2.66422	2.89753	21.5349	0.000101679	0.00380377	3	4	Up-regulated
Sus_scrofa___ROCK2	1.99665	9.90281	21.5133	0.000102055	0.00381213	3	4	Up-regulated
Sus_scrofa___TMEM181	1.08599	3.86529	21.4971	0.000102534	0.00382337	3	4	Up-regulated
Sus_scrofa___DLG5	1.72919	6.82671	21.4567	0.000103658	0.00385253	3	4	Up-regulated
Sus_scrofa___TPI1	1.43331	4.1018	21.4542	0.000103752	0.00385253	3	4	Up-regulated
Sus_scrofa___ITGB8	2.45346	7.762	21.4406	0.00010412	0.00386046	3	4	Up-regulated
Sus_scrofa___USP25	0.856326	9.21093	21.4181	0.00010477	0.0038788	3	4	Up-regulated
Sus_scrofa___PIP4K2A	1.93536	5.74153	21.3655	0.000106305	0.00392403	3	4	Up-regulated
Sus_scrofa___LIN54	1.00876	5.7	21.352	0.000106699	0.00393279	3	4	Up-regulated
Sus_scrofa___GCA	3.07736	0.839671	21.423	0.000107374	0.00395123	3	4	Up-regulated
Sus_scrofa___RPP30	2.6229	8.83317	21.3244	0.000107515	0.00395123	3	4	Up-regulated
Sus_scrofa___CASP7	1.53718	4.38916	21.2464	0.000109876	0.00402028	3	4	Up-regulated
Sus_scrofa___RESF1	1.36671	5.51997	21.2236	0.000110565	0.00403956	3	4	Up-regulated
Sus_scrofa___ENSSSCG00000040973	1.33464	2.81283	21.2036	0.000111272	0.00405949	3	4	Up-regulated
Sus_scrofa___TNNT1	1.94748	5.23086	21.0422	0.000116285	0.00421167	3	4	Up-regulated
Sus_scrofa___ENSSSCG00000033465	2.29734	-1.386	19.6852	0.000119288	0.00429188	3	4	Up-regulated
Sus_scrofa___RAB11FIP5	1.87547	2.94216	20.9524	0.000119329	0.00429188	3	4	Up-regulated
Sus_scrofa___ENSSSCG00000024660	4.3916	1.35858	20.9937	0.000119357	0.00429188	3	4	Up-regulated
Sus_scrofa___ENSSSCG00000022925	1.99552	7.18735	20.936	0.000119775	0.00430074	3	4	Up-regulated
Sus_scrofa___ENSSSCG00000016119	1.74406	6.38468	20.9284	0.000120028	0.00430149	3	4	Up-regulated
Papio_anubis_NIN	4.41147	-2.18678	18.7641	0.00012014	0.00430149	3	4	Up-regulated
Sus_scrofa___ABCD1	1.36331	6.29867	20.8916	0.00012127	0.00432957	3	4	Up-regulated
Sus_scrofa___EIF4G3	0.933719	8.87457	20.8543	0.000122542	0.00435511	3	4	Up-regulated
Sus_scrofa___LSM6	1.31635	4.35221	20.8507	0.000122682	0.00435511	3	4	Up-regulated
Sus_scrofa___ARPC5	2.07252	3.89753	20.8363	0.000123195	0.00436095	3	4	Up-regulated
Sus_scrofa___STAT1	3.7467	7.47782	20.8297	0.000123387	0.00436158	3	4	Up-regulated
Sus_scrofa___SERGEF	1.56779	5.46563	20.8205	0.000123709	0.00436681	3	4	Up-regulated
Sus_scrofa___PPP1R18	3.99977	1.0189	20.7428	0.000125023	0.00440079	3	4	Up-regulated
Sus_scrofa___NELL2	2.762	5.18037	20.7477	0.000126265	0.00443826	3	4	Up-regulated
Sus_scrofa___REEP2	1.82514	0.968938	20.7882	0.000126587	0.00444333	3	4	Up-regulated
Sus_scrofa___ENSSSCG00000009348	1.44577	5.9101	20.6728	0.000128938	0.0045069	3	4	Up-regulated
Sus_scrofa___PSMA5	0.980346	4.24164	20.634	0.000130374	0.00453877	3	4	Up-regulated
Sus_scrofa___ANKRD12	0.984252	8.20356	20.6329	0.000130394	0.00453877	3	4	Up-regulated
Sus_scrofa___ENSSSCG00000002045	7.83654	-0.681976	20.5348	0.000132347	0.00457493	3	4	Up-regulated
Sus_scrofa___SNAPC1	1.38564	7.377	20.5447	0.00013367	0.00460792	3	4	Up-regulated
Sus_scrofa___STN1	1.20088	4.88715	20.5033	0.000135251	0.00464323	3	4	Up-regulated
Sus_scrofa___H2AC6	3.17658	2.96812	20.497	0.000136072	0.00465864	3	4	Up-regulated
Sus_scrofa___ERAP2	3.19761	1.29288	20.5363	0.000137474	0.00470023	3	4	Up-regulated
Sus_scrofa___REL	1.47285	5.71663	20.438	0.00013776	0.00470358	3	4	Up-regulated
Sus_scrofa___P4HA1	2.03241	7.89017	20.4226	0.000138361	0.00471765	3	4	Up-regulated
Sus_scrofa___AMOTL1	1.09105	5.47064	20.381	0.000140002	0.00476421	3	4	Up-regulated
Sus_scrofa___NQO1	2.0724	2.1522	20.3927	0.000140107	0.00476421	3	4	Up-regulated
Sus_scrofa___CCDC167	1.40813	2.40542	20.3669	0.000140799	0.00478126	3	4	Up-regulated
Sus_scrofa___ZBTB22	1.72864	2.72251	20.3385	0.000141823	0.00480854	3	4	Up-regulated
Sus_scrofa___KLF6	2.25698	6.02669	20.3312	0.000141987	0.00480854	3	4	Up-regulated
Sus_scrofa___ENSSSCG00000032959	3.287	0.467525	20.3236	0.000143316	0.00484698	3	4	Up-regulated
Sus_scrofa___ZBTB44	0.775135	7.29615	20.2378	0.000145797	0.00492423	3	4	Up-regulated
Sus_scrofa___MYL12A	1.72275	5.70565	20.2207	0.000146509	0.00492803	3	4	Up-regulated
Sus_scrofa___KCNMA1	1.77877	8.02065	20.2203	0.000146526	0.00492803	3	4	Up-regulated
Sus_scrofa___ATF5	2.39789	2.94785	20.2221	0.000146667	0.00492803	3	4	Up-regulated
Sus_scrofa___FAM76A	0.857381	6.31612	20.1962	0.000147532	0.00494939	3	4	Up-regulated
Sus_scrofa___PGGT1B	1.07362	6.95227	20.1915	0.000147728	0.00494939	3	4	Up-regulated
Sus_scrofa___FAM43B	2.57672	-0.382754	19.7084	0.000151522	0.00504606	3	4	Up-regulated
Sus_scrofa___GFOD2	1.31981	4.3264	20.1006	0.000151622	0.00504606	3	4	Up-regulated
Sus_scrofa___COL16A1	3.10328	2.01847	20.1048	0.000152608	0.00507091	3	4	Up-regulated
Sus_scrofa___ENSSSCG00000007554	1.75581	2.93042	20.0734	0.000152911	0.00507091	3	4	Up-regulated
Sus_scrofa___JAKMIP3	4.30238	3.88422	20.0735	0.000152976	0.00507091	3	4	Up-regulated
Sus_scrofa___ACTB	1.25486	7.34561	20.0482	0.000153881	0.00509415	3	4	Up-regulated
Sus_scrofa___NOCT	1.3332	5.62655	20.0057	0.000155764	0.00514968	3	4	Up-regulated
Sus_scrofa___EGLN3	1.34134	6.54677	19.981	0.000156864	0.00516381	3	4	Up-regulated
Sus_scrofa___ENSSSCG00000037142	3.10939	-0.764828	18.4974	0.00015826	0.00518427	3	4	Up-regulated
Sus_scrofa___TSSC4	1.5808	2.36606	19.9271	0.000159528	0.00520988	3	4	Up-regulated
Sus_scrofa___ENSSSCG00000035738	4.76995	0.912708	18.7684	0.000159554	0.00520988	3	4	Up-regulated
Sus_scrofa___SLC38A2	1.63757	7.88328	19.9191	0.000159667	0.00520988	3	4	Up-regulated
Sus_scrofa___POC1B	1.192	3.74239	19.9002	0.000160575	0.00522915	3	4	Up-regulated
Sus_scrofa___COQ10B	1.2148	5.08452	19.8972	0.000160675	0.00522915	3	4	Up-regulated
Sus_scrofa___CDC42EP4	3.45947	0.0401959	19.7048	0.000162219	0.00526796	3	4	Up-regulated
Sus_scrofa___EGR1	6.51976	2.69715	19.6574	0.000162289	0.00526796	3	4	Up-regulated
Sus_scrofa___SNX25	1.17741	5.25095	19.8343	0.000163595	0.00528681	3	4	Up-regulated
Sus_scrofa___SERP2	1.33125	3.95358	19.8284	0.000163903	0.00528681	3	4	Up-regulated
Papio_anubis_U4-51	2.6746	-1.61198	17.4676	0.000168213	0.00541115	3	4	Up-regulated
Sus_scrofa___ENSSSCG00000006350	3.35088	2.68504	19.7349	0.000168835	0.00542418	3	4	Up-regulated
Sus_scrofa___PTGES3	0.935702	6.38067	19.7081	0.000169632	0.00542888	3	4	Up-regulated
Sus_scrofa___HOOK2	1.93771	5.81423	19.7081	0.000169632	0.00542888	3	4	Up-regulated
Sus_scrofa___SAMD9	4.02774	0.0748878	18.1521	0.000170894	0.00545531	3	4	Up-regulated
Sus_scrofa___ENSSSCG00000028531	2.84338	-1.62647	17.7449	0.000178631	0.00564468	3	4	Up-regulated
Sus_scrofa___ERO1A	1.73499	7.5325	19.513	0.000179449	0.00564914	3	4	Up-regulated
Sus_scrofa___SMURF1	1.48463	6.01224	19.4993	0.00018016	0.00566442	3	4	Up-regulated
Sus_scrofa___TLNRD1	3.79729	-0.390538	19.0613	0.000182956	0.00573789	3	4	Up-regulated
Sus_scrofa___ARFGAP3	1.17043	6.87711	19.4278	0.000183929	0.0057612	3	4	Up-regulated
Sus_scrofa___CDH24	2.26541	0.478953	19.4744	0.000185754	0.00581107	3	4	Up-regulated
Sus_scrofa___RNASEH2B	1.25662	3.75157	19.376	0.000186755	0.00582781	3	4	Up-regulated
pCMV_____gp26	7.62512	-2.0322	29.2134	0.000188804	0.00587689	3	4	Up-regulated
Sus_scrofa___ZNF536	2.17279	3.81347	19.3283	0.000189375	0.00587689	3	4	Up-regulated
Sus_scrofa___CHD3	1.71772	3.69403	19.3229	0.000189673	0.00587689	3	4	Up-regulated
Sus_scrofa___TSPAN5	3.69088	3.67877	19.3288	0.000189888	0.00587689	3	4	Up-regulated
Sus_scrofa___NPPA	4.52584	4.45593	19.3179	0.000189971	0.00587689	3	4	Up-regulated
Sus_scrofa___CCSER1	3.03364	5.36689	19.2946	0.000191191	0.00590733	3	4	Up-regulated
Sus_scrofa___CLMN	2.18444	2.84857	19.2816	0.000192241	0.00592613	3	4	Up-regulated
Sus_scrofa___EPSTI1	5.75964	6.31002	19.2755	0.000192273	0.00592613	3	4	Up-regulated
Sus_scrofa___AKR1D1	1.88693	4.90675	19.2696	0.000192592	0.00592865	3	4	Up-regulated
Sus_scrofa___DAPK3	1.7114	6.63057	19.2632	0.000192932	0.00593182	3	4	Up-regulated
Sus_scrofa___KAZN	1.2105	4.51473	19.2451	0.000193968	0.00594178	3	4	Up-regulated
Sus_scrofa___CPNE5	3.138	4.91168	19.2394	0.000194302	0.00594474	3	4	Up-regulated
Papio_anubis_ENSPANG00000034481	5.10235	-0.959214	17.0808	0.000198719	0.00606504	3	4	Up-regulated
Sus_scrofa___SNAPC2	2.0114	-0.0142918	19.1981	0.000200012	0.00608225	3	4	Up-regulated
Sus_scrofa___BHLHE41	6.91655	-0.354733	20.0266	0.000200255	0.00608225	3	4	Up-regulated
Sus_scrofa___ENSSSCG00000031922	4.28563	-0.499131	17.4498	0.000201046	0.0060989	3	4	Up-regulated
Sus_scrofa___MSN	1.81498	4.44854	19.0605	0.000204722	0.00618791	3	4	Up-regulated
Sus_scrofa___LIG4	1.32686	1.71654	19.0696	0.000205097	0.00619177	3	4	Up-regulated
Sus_scrofa___PTGFRN	1.32247	4.30011	19.0453	0.000205625	0.00620022	3	4	Up-regulated
Sus_scrofa___SLCO4C1	3.07622	3.58602	19.0373	0.000206256	0.00621176	3	4	Up-regulated
Sus_scrofa___PLAGL1	1.13239	7.49836	19.0027	0.000208171	0.00624688	3	4	Up-regulated
Sus_scrofa___SSBP2	1.31339	9.59017	18.9812	0.000209484	0.00627356	3	4	Up-regulated
Sus_scrofa___ZNF292	0.908728	8.03875	18.9249	0.000212976	0.00634925	3	4	Up-regulated
Sus_scrofa___GDAP1	2.31004	0.859009	18.9888	0.000213105	0.00634925	3	4	Up-regulated
Sus_scrofa___KCTD6	0.792376	5.05809	18.9133	0.000213705	0.00635955	3	4	Up-regulated
Sus_scrofa___CNN1	2.89672	5.41201	18.9092	0.000214006	0.00636097	3	4	Up-regulated
Sus_scrofa___SRRM3	1.64623	2.47583	18.9037	0.000214613	0.00637143	3	4	Up-regulated
Sus_scrofa___PRR5	3.21628	0.729348	18.9275	0.000217075	0.00641999	3	4	Up-regulated
Sus_scrofa___PJA1	1.78774	1.76836	18.873	0.000217077	0.00641999	3	4	Up-regulated
Sus_scrofa___FOS	5.74881	4.67056	18.8381	0.000218691	0.00645422	3	4	Up-regulated
Sus_scrofa___PDE8A	1.1371	8.00865	18.7929	0.000221399	0.00649437	3	4	Up-regulated
Sus_scrofa___GPX1	4.12255	1.07583	18.7557	0.000221399	0.00649437	3	4	Up-regulated
Sus_scrofa___GLCCI1	1.63057	4.61026	18.7909	0.000221545	0.00649437	3	4	Up-regulated
Sus_scrofa___HS3ST1	2.70035	-0.0983407	18.6642	0.000222105	0.00650132	3	4	Up-regulated
Sus_scrofa___PSMD4	0.769324	5.08929	18.7555	0.000223859	0.00654499	3	4	Up-regulated
Sus_scrofa___SH3GLB1	0.90224	7.05241	18.7302	0.000225524	0.0065603	3	4	Up-regulated
Sus_scrofa___ENSSSCG00000013889	4.61711	2.90386	18.7229	0.00022693	0.0065603	3	4	Up-regulated
Sus_scrofa___ENAH	1.70109	9.11217	18.7085	0.000226975	0.0065603	3	4	Up-regulated
Sus_scrofa___ENSSSCG00000036556	1.47813	7.091	18.7051	0.000227205	0.0065603	3	4	Up-regulated
Sus_scrofa___CDKN1C	3.28684	-1.69753	16.5809	0.000229065	0.00658945	3	4	Up-regulated
Sus_scrofa___ENSSSCG00000014997	4.58727	1.58118	18.6497	0.000230726	0.00662958	3	4	Up-regulated
Sus_scrofa___KLF7	1.91263	5.98665	18.6257	0.000232597	0.00666043	3	4	Up-regulated
Sus_scrofa___USP31	1.24914	4.52238	18.558	0.000237322	0.00676475	3	4	Up-regulated
Sus_scrofa___PTPN14	1.14454	7.62098	18.5389	0.000238643	0.00679468	3	4	Up-regulated
Sus_scrofa___ENSSSCG00000044574	6.19686	2.4555	18.3111	0.000241089	0.00684873	3	4	Up-regulated
Sus_scrofa___CDK2AP2	2.22404	0.282115	18.5755	0.000242028	0.00686762	3	4	Up-regulated
Sus_scrofa___PCSK5	1.84353	8.51108	18.4216	0.000247097	0.00698769	3	4	Up-regulated
Sus_scrofa___ZNF664	0.766299	7.5979	18.4152	0.000247573	0.00699323	3	4	Up-regulated
Sus_scrofa___MFSD2B	1.09217	3.58213	18.3918	0.000249368	0.00702807	3	4	Up-regulated
Sus_scrofa___CPQ	2.0812	3.23103	18.3778	0.000250504	0.00705216	3	4	Up-regulated
Sus_scrofa___ENSSSCG00000003520	0.817348	6.90403	18.3465	0.000252679	0.00709743	3	4	Up-regulated
Sus_scrofa___ENSSSCG00000043413	3.58156	-2.00313	16.051	0.000254567	0.00713005	3	4	Up-regulated
Papio_anubis_RPS12	3.77452	-0.581238	16.5056	0.000254753	0.00713005	3	4	Up-regulated
Sus_scrofa___VEZF1	0.846291	6.35033	18.3161	0.00025498	0.00713005	3	4	Up-regulated
Sus_scrofa___RPL37	3.25206	3.26182	18.3111	0.000255672	0.00713478	3	4	Up-regulated
Sus_scrofa___ENSSSCG00000049262	3.35148	-1.70636	15.968	0.000258493	0.00717217	3	4	Up-regulated
Sus_scrofa___VEGFD	2.76245	0.601528	18.3357	0.000259071	0.00718024	3	4	Up-regulated
Sus_scrofa___TENT4A	1.08327	4.90149	18.227	0.000261856	0.00724943	3	4	Up-regulated
Sus_scrofa___MAFF	4.48861	4.03813	18.22	0.000262928	0.00726348	3	4	Up-regulated
Sus_scrofa___NPC1	1.14478	4.25813	18.2134	0.000262945	0.00726348	3	4	Up-regulated
Sus_scrofa___RGL1	1.34476	5.72523	18.1769	0.000265803	0.00733434	3	4	Up-regulated
Sus_scrofa___ETV5	2.80354	1.63539	18.1511	0.000272784	0.00747752	3	4	Up-regulated
Sus_scrofa___HMOX2	1.2302	7.28478	18.0568	0.000275539	0.00752829	3	4	Up-regulated
Sus_scrofa___SLAIN2	1.25884	7.43168	18.01	0.000279429	0.00761794	3	4	Up-regulated
Sus_scrofa___SQLE	1.99874	4.675	17.9669	0.000283101	0.00768689	3	4	Up-regulated
Sus_scrofa___SYAP1	1.31039	5.24984	17.9657	0.000283187	0.00768689	3	4	Up-regulated
Sus_scrofa___GRINA	1.82919	-0.3719	17.5309	0.000284006	0.00770079	3	4	Up-regulated
pCMV_____gp73	8.48268	-1.48944	26.4862	0.000284826	0.00771234	3	4	Up-regulated
Sus_scrofa___ABL2	0.89652	7.33077	17.9148	0.00028755	0.00773597	3	4	Up-regulated
Sus_scrofa___VTI1A	0.937723	7.81555	17.9122	0.000287777	0.00773597	3	4	Up-regulated
Sus_scrofa___ANXA5	1.62414	5.35999	17.8579	0.00029253	0.00783445	3	4	Up-regulated
Sus_scrofa___ENSSSCG00000007944	2.53336	0.569934	17.8753	0.000297322	0.00792448	3	4	Up-regulated
Sus_scrofa___PRKCE	1.08305	10.0824	17.7898	0.000298601	0.00794164	3	4	Up-regulated
Sus_scrofa___RNF115	1.28769	7.83682	17.7753	0.000299907	0.00795947	3	4	Up-regulated
Sus_scrofa___STXBP1	1.32975	3.21115	17.7697	0.000300538	0.00796775	3	4	Up-regulated
Sus_scrofa___FERMT3	2.39774	2.27865	17.7692	0.000302314	0.0079827	3	4	Up-regulated
Sus_scrofa___PSMD11	0.895152	5.60346	17.7482	0.000302378	0.0079827	3	4	Up-regulated
Sus_scrofa___SHISAL2A	1.37913	2.63398	17.7463	0.000302812	0.00798574	3	4	Up-regulated
Sus_scrofa___VCL	1.28326	9.16851	17.7118	0.000305722	0.00804554	3	4	Up-regulated
Sus_scrofa___MYC	2.80308	2.40023	17.7053	0.000306955	0.00806137	3	4	Up-regulated
Sus_scrofa___MYOT	1.39786	9.12675	17.6782	0.000308849	0.00808532	3	4	Up-regulated
Sus_scrofa___RASSF8	1.4705	8.80962	17.6471	0.000311775	0.00813638	3	4	Up-regulated
Sus_scrofa___BCLAF1	0.933098	6.6943	17.5842	0.000317782	0.00824159	3	4	Up-regulated
Sus_scrofa___ENSSSCG00000012915	2.58074	-0.364794	17.2438	0.00031897	0.00824466	3	4	Up-regulated
Sus_scrofa___PLAAT3	1.21954	5.30071	17.5695	0.000319218	0.00824466	3	4	Up-regulated
Sus_scrofa___CTNND1	1.03079	8.15632	17.5394	0.000322138	0.00829439	3	4	Up-regulated
Sus_scrofa___VEZT	0.822215	7.69683	17.5296	0.000323098	0.00831056	3	4	Up-regulated
Sus_scrofa___GADD45A	2.04474	3.55387	17.5168	0.000324468	0.00832869	3	4	Up-regulated
Sus_scrofa___PPP1R10	1.29458	5.71776	17.5041	0.000325624	0.00834124	3	4	Up-regulated
Sus_scrofa___ZNF703	2.8246	-1.49227	16.082	0.000326954	0.00836674	3	4	Up-regulated
Sus_scrofa___DEGS1	0.993504	3.80453	17.4516	0.000330928	0.00844374	3	4	Up-regulated
Sus_scrofa___GIPC1	1.55892	1.98332	17.4532	0.00033164	0.00845209	3	4	Up-regulated
Sus_scrofa___H1-3	2.52393	3.38552	17.4373	0.000333159	0.00847355	3	4	Up-regulated
Sus_scrofa___CEND1	3.6796	-1.63066	15.5079	0.000334763	0.00850569	3	4	Up-regulated
Sus_scrofa___MAX	1.37898	6.51999	17.3959	0.000336536	0.00853992	3	4	Up-regulated
Sus_scrofa___SLCO1A2	2.10784	-0.310423	17.3278	0.000336793	0.00853992	3	4	Up-regulated
Sus_scrofa___ENSSSCG00000013391	0.936462	4.88713	17.3317	0.000343222	0.00867558	3	4	Up-regulated
Sus_scrofa___PROSER2	1.50799	4.63928	17.3256	0.000343872	0.00867558	3	4	Up-regulated
Sus_scrofa___ENSSSCG00000039731	1.85677	3.15821	17.3125	0.000345457	0.00869545	3	4	Up-regulated
Sus_scrofa___DYNLT3	1.43824	1.7129	17.3179	0.000345811	0.00869545	3	4	Up-regulated
Sus_scrofa___MOSPD2	1.02019	4.53033	17.211	0.000356162	0.00888699	3	4	Up-regulated
Sus_scrofa___MRPS30	0.977388	5.54847	17.1804	0.000359494	0.00895229	3	4	Up-regulated
Papio_anubis_ANKRD2	4.61378	-2.2156	15.3901	0.000361405	0.0089881	3	4	Up-regulated
Papio_anubis_CRYAB	3.13692	-1.22079	15.8712	0.00036165	0.0089881	3	4	Up-regulated
Sus_scrofa___IRAK2	2.39918	1.10228	17.1848	0.000362025	0.0089885	3	4	Up-regulated
Sus_scrofa___HPGD	3.63097	1.55699	17.1834	0.000362911	0.00900145	3	4	Up-regulated
Papio_anubis_CLIP1	3.31953	-2.23144	15.8264	0.00036423	0.0090164	3	4	Up-regulated
Sus_scrofa___TM2D3	0.918198	5.31841	17.1322	0.000364857	0.00902063	3	4	Up-regulated
Sus_scrofa___BACH1	1.02254	6.24302	17.118	0.000366452	0.00904458	3	4	Up-regulated
Sus_scrofa___ENSSSCG00000045560	1.43074	4.91959	17.0995	0.000368554	0.00907086	3	4	Up-regulated
Sus_scrofa___FAM162A	0.799638	6.85934	17.0878	0.00036987	0.00909307	3	4	Up-regulated
Sus_scrofa___ITGA5	1.45909	7.75207	17.0829	0.000370431	0.00909773	3	4	Up-regulated
Sus_scrofa___SPTLC2	1.35943	3.84852	17.0804	0.000370787	0.00909773	3	4	Up-regulated
Papio_anubis_ENSPANG00000037669	4.89254	-1.93153	16.4377	0.000373935	0.00915703	3	4	Up-regulated
Papio_anubis_ACTA1	2.53294	1.89264	17.0384	0.000379356	0.00927162	3	4	Up-regulated
Sus_scrofa___H3-5	2.76356	6.88334	17.001	0.000379893	0.00927569	3	4	Up-regulated
Sus_scrofa___UBR1	0.684427	7.69283	16.9897	0.000381215	0.00927628	3	4	Up-regulated
Sus_scrofa___LRRC42	1.24056	4.14462	16.9897	0.000381262	0.00927628	3	4	Up-regulated
Sus_scrofa___NFATC2	1.52825	3.99968	16.9888	0.0003814	0.00927628	3	4	Up-regulated
Sus_scrofa___CLNK	2.96206	0.395593	16.9117	0.000383924	0.00931957	3	4	Up-regulated
Sus_scrofa___CGNL1	4.19253	1.87093	16.9427	0.000390323	0.00943827	3	4	Up-regulated
Sus_scrofa___MKLN1	0.70796	8.47132	16.9004	0.000391885	0.00946689	3	4	Up-regulated
Sus_scrofa___CASP3	1.20773	5.35857	16.8865	0.000393582	0.00948958	3	4	Up-regulated
Sus_scrofa___ENSSSCG00000029003	3.69449	-0.841416	15.881	0.000396486	0.00954801	3	4	Up-regulated
Sus_scrofa___SSR1	0.744962	5.71837	16.8604	0.000396769	0.00954801	3	4	Up-regulated
Sus_scrofa___MASP2	2.70595	4.20992	16.8408	0.000399286	0.009571	3	4	Up-regulated
Sus_scrofa___RGS7	0.802039	8.68937	16.8371	0.000399636	0.009571	3	4	Up-regulated
Sus_scrofa___SLC5A6	2.01291	3.95266	16.8309	0.000400485	0.00957302	3	4	Up-regulated
Sus_scrofa___LDLR	2.87795	0.972684	16.8629	0.000401847	0.00959597	3	4	Up-regulated
Sus_scrofa___TRAIP	1.77511	2.87527	16.819	0.000402213	0.00959597	3	4	Up-regulated
Sus_scrofa___FGF5	2.2382	1.48285	16.833	0.000402915	0.00960023	3	4	Up-regulated
Sus_scrofa___ENSSSCG00000009303	4.09334	2.87998	16.8204	0.000403158	0.00960023	3	4	Up-regulated
Sus_scrofa___ENSSSCG00000014540	2.2627	4.42394	16.7876	0.000405868	0.0096415	3	4	Up-regulated
Sus_scrofa___FHL1	1.41299	9.2001	16.7821	0.000406516	0.0096415	3	4	Up-regulated
Sus_scrofa___TPH2	1.42222	1.39101	16.7958	0.000407203	0.0096415	3	4	Up-regulated
Sus_scrofa___RPL28	3.3934	3.01774	16.7159	0.000415491	0.00979142	3	4	Up-regulated
Sus_scrofa___SHKBP1	2.73403	-0.183728	16.6424	0.000417387	0.00981761	3	4	Up-regulated
Sus_scrofa___PTBP3	1.21408	5.69422	16.6416	0.000424665	0.00995194	3	4	Up-regulated
Sus_scrofa___ENSSSCG00000004578	2.35156	4.45247	16.6422	0.000424669	0.00995194	3	4	Up-regulated
Sus_scrofa___APOBEC3B	2.21457	2.56115	16.6492	0.000424688	0.00995194	3	4	Up-regulated
Sus_scrofa___C2CD3	0.878202	6.11705	16.5439	0.000437807	0.0102115	3	4	Up-regulated
Sus_scrofa___ITM2C	3.21891	0.160853	16.5772	0.000438669	0.0102221	3	4	Up-regulated
Sus_scrofa___ENSSSCG00000014910	3.81944	1.59442	16.5555	0.000444914	0.0103196	3	4	Up-regulated
Sus_scrofa___FUNDC2	0.792042	4.78226	16.461	0.000449327	0.0103931	3	4	Up-regulated
pCMV_____gp33	7.56585	-2.05432	23.6266	0.000450385	0.0104079	3	4	Up-regulated
Sus_scrofa___RBAK	0.766747	3.9461	16.4257	0.000454354	0.0104742	3	4	Up-regulated
Sus_scrofa___SELENOF	0.950096	4.17648	16.4246	0.000454507	0.0104742	3	4	Up-regulated
Sus_scrofa___FOXO1	1.24222	7.56538	16.3776	0.0004612	0.0106186	3	4	Up-regulated
Sus_scrofa___AARS1	1.44031	5.85086	16.3466	0.00046571	0.010693	3	4	Up-regulated
Sus_scrofa___CDR2	1.71582	2.52674	16.3113	0.000471384	0.0108034	3	4	Up-regulated
Sus_scrofa___ENSSSCG00000045639	1.93758	0.452271	16.35	0.000472701	0.010815	3	4	Up-regulated
Sus_scrofa___PHTF1	0.923736	5.71186	16.2972	0.000472996	0.010815	3	4	Up-regulated
Sus_scrofa___HIVEP2	1.45775	9.04362	16.2959	0.000473184	0.010815	3	4	Up-regulated
Sus_scrofa___HSPB1	2.24711	6.7595	16.2708	0.000476933	0.0108809	3	4	Up-regulated
Sus_scrofa___RECQL	1.32279	3.34119	16.2694	0.000477318	0.0108809	3	4	Up-regulated
Sus_scrofa___CEP152	1.32155	3.41541	16.2688	0.000477372	0.0108809	3	4	Up-regulated
Sus_scrofa___DNAJC5	1.55546	1.66041	16.2716	0.000478529	0.0108973	3	4	Up-regulated
Sus_scrofa___ATMIN	1.00468	4.36688	16.2401	0.000481614	0.0109576	3	4	Up-regulated
Sus_scrofa___LDHC	1.58244	2.68301	16.2234	0.000484579	0.011005	3	4	Up-regulated
Sus_scrofa___ENSSSCG00000036469	2.24064	0.050186	16.1591	0.000487086	0.0110497	3	4	Up-regulated
Sus_scrofa___GCNT4	2.63036	0.320244	16.2338	0.000491234	0.0110878	3	4	Up-regulated
Sus_scrofa___FRYL	0.920901	7.26837	16.175	0.000491552	0.0110878	3	4	Up-regulated
Sus_scrofa___RNF152	1.81931	5.17766	16.1614	0.000493682	0.0111128	3	4	Up-regulated
Sus_scrofa___RPLP1	4.44507	4.59022	16.1631	0.000493763	0.0111128	3	4	Up-regulated
Sus_scrofa___DUSP10	2.54153	3.36136	16.1453	0.000496407	0.0111322	3	4	Up-regulated
Sus_scrofa___SQSTM1	1.31597	6.353	16.1296	0.000498652	0.0111726	3	4	Up-regulated
Sus_scrofa___RND3	1.65328	6.33479	16.1155	0.000500887	0.0112126	3	4	Up-regulated
Sus_scrofa___BNIP3	1.72011	6.495	16.1091	0.000501891	0.0112176	3	4	Up-regulated
Sus_scrofa___PSMD3	0.888449	4.88463	16.1085	0.000502007	0.0112176	3	4	Up-regulated
Sus_scrofa___TBC1D1	1.00148	7.26241	16.0918	0.00050464	0.011234	3	4	Up-regulated
Sus_scrofa___B3GNT5	1.21293	2.14684	16.087	0.000506529	0.0112484	3	4	Up-regulated
Sus_scrofa___ROR1	1.45043	11.4103	16.0709	0.000507992	0.0112687	3	4	Up-regulated
Sus_scrofa___JCHAIN	0.907895	4.87345	16.0649	0.000508986	0.0112729	3	4	Up-regulated
Sus_scrofa___AVPI1	1.42584	4.7772	15.9853	0.00052199	0.0114989	3	4	Up-regulated
Sus_scrofa___ENSSSCG00000049426	2.70378	-1.07705	15.1758	0.000522254	0.0114989	3	4	Up-regulated
Sus_scrofa___RBM25	0.802085	7.65056	15.9801	0.00052282	0.0114989	3	4	Up-regulated
Sus_scrofa___RAB36	1.76302	-0.87036	15.5074	0.000522865	0.0114989	3	4	Up-regulated
Sus_scrofa___RSRC1	0.852784	6.93073	15.9614	0.000525921	0.0115559	3	4	Up-regulated
Sus_scrofa___CDC42EP2	2.91746	0.695799	15.9761	0.000528442	0.0115763	3	4	Up-regulated
Sus_scrofa___VRK2	0.945412	6.20901	15.9449	0.000528698	0.0115763	3	4	Up-regulated
Sus_scrofa___SH3PXD2B	1.60955	6.71135	15.9191	0.000533036	0.0116484	3	4	Up-regulated
pCMV_____gp46	8.33413	-1.60584	22.6559	0.000533805	0.0116484	3	4	Up-regulated
Sus_scrofa___RNPEP	1.54576	2.50984	15.92	0.00053385	0.0116484	3	4	Up-regulated
Sus_scrofa___RPS28	2.6286	3.27592	15.8957	0.000537398	0.0117054	3	4	Up-regulated
Sus_scrofa___CD59	1.37938	3.83755	15.887	0.000538584	0.011721	3	4	Up-regulated
Sus_scrofa___GHITM	0.995443	5.38699	15.8659	0.000542138	0.0117637	3	4	Up-regulated
Sus_scrofa___ENSSSCG00000038506	1.09672	6.19529	15.8658	0.000542158	0.0117637	3	4	Up-regulated
Sus_scrofa___MTURN	2.64488	1.64949	15.8999	0.000542426	0.0117637	3	4	Up-regulated
Sus_scrofa___APOA1	4.98414	-2.32826	14.4628	0.00054552	0.0118206	3	4	Up-regulated
Sus_scrofa___IGSF8	1.6126	1.34742	15.8469	0.000548066	0.0118654	3	4	Up-regulated
Sus_scrofa___ENSSSCG00000035836	2.95431	0.387743	15.8555	0.000550339	0.0118941	3	4	Up-regulated
Sus_scrofa___GCLC	1.2983	4.05628	15.811	0.000551766	0.0118969	3	4	Up-regulated
Sus_scrofa___GEMIN8	1.11349	2.44278	15.8013	0.000554001	0.0119115	3	4	Up-regulated
Sus_scrofa___LURAP1L	4.50651	2.08122	15.7239	0.000563077	0.0120549	3	4	Up-regulated
Sus_scrofa___HSBP1	1.70383	2.92689	15.7199	0.000568283	0.0121195	3	4	Up-regulated
Papio_anubis_BLOC1S1	5.15188	-2.93821	17.8783	0.000568515	0.0121195	3	4	Up-regulated
Sus_scrofa___MGMT	1.51835	7.07705	15.69	0.000573421	0.0121894	3	4	Up-regulated
Sus_scrofa___CDKN3	1.63801	2.88602	15.691	0.000573573	0.0121894	3	4	Up-regulated
Sus_scrofa___UBE2D2	0.685404	7.44963	15.6832	0.000574671	0.0121986	3	4	Up-regulated
Sus_scrofa___LHFPL6	2.03694	7.69646	15.6806	0.000575154	0.0121986	3	4	Up-regulated
Sus_scrofa___FBXO4	0.782547	5.86925	15.6536	0.000580148	0.0122837	3	4	Up-regulated
pCMV_____gp43	6.97098	-2.3645	19.4683	0.000581145	0.0122841	3	4	Up-regulated
Sus_scrofa___ENSSSCG00000010531	0.973656	5.24907	15.645	0.000581753	0.0122865	3	4	Up-regulated
Sus_scrofa___APAF1	1.25662	4.7034	15.6228	0.00058593	0.0123315	3	4	Up-regulated
Sus_scrofa___RBM44	1.12672	2.98211	15.5347	0.000602992	0.012618	3	4	Up-regulated
Sus_scrofa___RLF	0.82075	7.70661	15.5267	0.000604246	0.0126231	3	4	Up-regulated
Sus_scrofa___ENSSSCG00000002953	2.48718	0.385243	15.4758	0.000620573	0.0129103	3	4	Up-regulated
Sus_scrofa___RHOA	1.12754	8.07598	15.4192	0.000625507	0.0129583	3	4	Up-regulated
Sus_scrofa___ENSSSCG00000044995	1.8708	1.45444	15.4339	0.000625546	0.0129583	3	4	Up-regulated
Papio_anubis_RPL18A	5.6815	-2.65949	15.1315	0.000632593	0.0130626	3	4	Up-regulated
Sus_scrofa___ENSSSCG00000014186	1.45807	1.42301	15.3854	0.00063583	0.0131179	3	4	Up-regulated
Sus_scrofa___LRP3	1.80449	1.11622	15.3809	0.000638424	0.0131481	3	4	Up-regulated
Sus_scrofa___ENSSSCG00000016737	2.45241	2.84284	15.3568	0.000638835	0.0131481	3	4	Up-regulated
Papio_anubis_PRKAA1	3.70113	-1.96912	13.8726	0.000645668	0.0132127	3	4	Up-regulated
Sus_scrofa___ICAM1	3.89568	-0.476409	14.5567	0.000646465	0.0132182	3	4	Up-regulated
Sus_scrofa___FBXO21	0.751191	6.5854	15.2965	0.000650769	0.0132845	3	4	Up-regulated
Sus_scrofa___ENSSSCG00000012566	0.929212	5.06631	15.2868	0.000652851	0.0133072	3	4	Up-regulated
Sus_scrofa___ADAMTS2	2.9348	1.33322	15.2987	0.000656048	0.013357	3	4	Up-regulated
Sus_scrofa___FYTTD1	1.09644	7.27488	15.2688	0.000656638	0.013357	3	4	Up-regulated
Sus_scrofa___C6orf89	0.938287	4.45466	15.2673	0.000656991	0.013357	3	4	Up-regulated
Papio_anubis_IFIH1	5.86447	-2.74057	17.0856	0.000660683	0.0134212	3	4	Up-regulated
Sus_scrofa___PLCG2	2.17877	1.93354	15.26	0.000661993	0.0134369	3	4	Up-regulated
Sus_scrofa___MXD1	1.19042	5.10447	15.2106	0.000669155	0.0135493	3	4	Up-regulated
Sus_scrofa___GRK6	1.13139	3.97224	15.1734	0.000677336	0.0136707	3	4	Up-regulated
Sus_scrofa___PROCA1	2.15534	2.52885	15.1661	0.000679683	0.013707	3	4	Up-regulated
Sus_scrofa___IL5RA	6.19328	-0.203422	15.3081	0.000681814	0.0137389	3	4	Up-regulated
Sus_scrofa___DHDH	0.985316	3.64033	15.1475	0.000683124	0.0137543	3	4	Up-regulated
Sus_scrofa___PARVB	1.03595	6.79481	15.1341	0.000685941	0.0137797	3	4	Up-regulated
Sus_scrofa___C14orf119	1.67287	1.59822	15.1434	0.000686482	0.0137797	3	4	Up-regulated
Sus_scrofa___NUAK2	1.93891	1.64811	15.1428	0.000687176	0.0137804	3	4	Up-regulated
Sus_scrofa___F2R	3.70558	-0.291733	14.8185	0.000688252	0.0137909	3	4	Up-regulated
Sus_scrofa___SLIT2	3.52716	6.38878	15.1146	0.000690355	0.013822	3	4	Up-regulated
Sus_scrofa___OSGIN1	1.35481	4.41635	15.0952	0.000694732	0.0138732	3	4	Up-regulated
Sus_scrofa___ARFIP1	0.688475	7.17873	15.0892	0.000696034	0.0138802	3	4	Up-regulated
Sus_scrofa___KLF5	3.48891	1.26807	14.7155	0.000698139	0.0139111	3	4	Up-regulated
Sus_scrofa___TNKS2	0.638239	6.9108	15.0526	0.000704371	0.0140241	3	4	Up-regulated
Sus_scrofa___RNF216	0.759728	7.23984	15.0308	0.000709389	0.0140904	3	4	Up-regulated
Sus_scrofa___MED12L	1.31615	4.36007	15.025	0.000710804	0.0141073	3	4	Up-regulated
Sus_scrofa___PRDM2	0.917567	6.99667	15.0166	0.000712672	0.0141332	3	4	Up-regulated
Sus_scrofa___AEBP2	0.78357	7.37443	15.0041	0.000715596	0.0141799	3	4	Up-regulated
Sus_scrofa___MFHAS1	1.56174	8.32744	14.9937	0.000718016	0.0142166	3	4	Up-regulated
Sus_scrofa___SOGA1	1.13705	4.2376	14.9819	0.000720854	0.0142364	3	4	Up-regulated
Sus_scrofa___ARRDC4	1.95585	3.14196	14.9656	0.000724925	0.0142743	3	4	Up-regulated
Papio_anubis_ATP5F1E	5.61633	-2.72458	16.0814	0.000726229	0.0142776	3	4	Up-regulated
Sus_scrofa___AREG	4.55764	2.27367	14.9356	0.000729642	0.0143222	3	4	Up-regulated
Sus_scrofa___RPS8	2.44105	4.43333	14.9288	0.000733486	0.0143622	3	4	Up-regulated
Sus_scrofa___CPLX4	1.58542	0.79965	14.9666	0.000733976	0.0143622	3	4	Up-regulated
Sus_scrofa___CSF1	2.15203	1.79729	14.9301	0.00073557	0.0143821	3	4	Up-regulated
Sus_scrofa___GATAD2B	0.778207	8.30358	14.9062	0.000738837	0.0144235	3	4	Up-regulated
Sus_scrofa___ACTR3	0.871451	6.25321	14.8691	0.000747861	0.0145883	3	4	Up-regulated
Papio_anubis_ENSPANG00000009265	4.75045	-2.91788	14.4043	0.000753921	0.0146721	3	4	Up-regulated
Sus_scrofa___ENSSSCG00000037376	1.63225	6.24237	14.8089	0.000762768	0.0148098	3	4	Up-regulated
Sus_scrofa___RPL18	3.16198	3.44932	14.7892	0.00076806	0.0148894	3	4	Up-regulated
Sus_scrofa___ANKRD29	1.66033	2.30352	14.7892	0.000768826	0.0148927	3	4	Up-regulated
Sus_scrofa___FAM155B	2.0324	0.815472	14.8087	0.000771057	0.0149154	3	4	Up-regulated
Sus_scrofa___TIAM2	1.51657	7.08848	14.7754	0.000771188	0.0149154	3	4	Up-regulated
Sus_scrofa___ENSSSCG00000048543	1.16455	3.25816	14.7704	0.000772708	0.0149169	3	4	Up-regulated
Sus_scrofa___NMNAT3	1.50573	6.178	14.7686	0.000772899	0.0149169	3	4	Up-regulated
Sus_scrofa___GDAP2	0.955088	5.85299	14.7578	0.000775671	0.0149444	3	4	Up-regulated
Sus_scrofa___CEMIP2	2.40089	3.64262	14.7528	0.000777165	0.0149616	3	4	Up-regulated
Sus_scrofa___TIMP1	5.88091	-0.842225	14.2641	0.000780872	0.0149959	3	4	Up-regulated
Sus_scrofa___PGK1	0.955661	5.35892	14.7337	0.000781844	0.0149959	3	4	Up-regulated
Sus_scrofa___RAB18	0.636034	6.79474	14.7332	0.000781942	0.0149959	3	4	Up-regulated
Sus_scrofa___MAGI3	1.21515	6.92053	14.6938	0.000792142	0.0151451	3	4	Up-regulated
Sus_scrofa___ETV3	1.475	3.26529	14.6831	0.000795204	0.015192	3	4	Up-regulated
Papio_anubis_RRAS2	5.13484	-2.84671	14.2212	0.000797387	0.0152221	3	4	Up-regulated
Sus_scrofa___ENSSSCG00000047841	2.57463	-1.14676	14.0452	0.000803387	0.0153016	3	4	Up-regulated
Sus_scrofa___CSNKA2IP	5.4733	-2.52405	13.3509	0.000805617	0.0153324	3	4	Up-regulated
Sus_scrofa___ACBD3	0.78723	5.41426	14.6259	0.000810078	0.0153943	3	4	Up-regulated
Sus_scrofa___ENSSSCG00000033262	2.52835	4.07356	14.6129	0.000813656	0.0154452	3	4	Up-regulated
Sus_scrofa___GJC1	1.99633	3.70242	14.612	0.000814007	0.0154452	3	4	Up-regulated
pCMV_____gp45	10.3733	0.0401139	23.7711	0.000818188	0.0155127	3	4	Up-regulated
Sus_scrofa___ORMDL1	1.89095	4.79422	14.5866	0.000820666	0.0155323	3	4	Up-regulated
Papio_anubis_MORF4L1	3.89758	-1.70725	13.8605	0.000821844	0.0155325	3	4	Up-regulated
Sus_scrofa___MET	2.62352	0.530265	14.6067	0.000822333	0.0155325	3	4	Up-regulated
Sus_scrofa___CEP95	1.03175	6.9233	14.5765	0.000823364	0.015533	3	4	Up-regulated
Sus_scrofa___METTL9	0.877228	5.61403	14.5715	0.000824737	0.015533	3	4	Up-regulated
Sus_scrofa___AZIN1	1.0427	6.39617	14.5656	0.000826349	0.0155425	3	4	Up-regulated
pCMV_____gp03	6.84552	-2.44414	20.0503	0.000826591	0.0155425	3	4	Up-regulated
Sus_scrofa___TNFSF13B	2.57433	-0.528573	14.4597	0.000829177	0.015579	3	4	Up-regulated
pCMV_____gp48	7.73166	-1.98044	23.717	0.000829775	0.015579	3	4	Up-regulated
Sus_scrofa___SEPTIN10	1.00555	4.73146	14.5186	0.00083933	0.015693	3	4	Up-regulated
Sus_scrofa___MTHFD2	1.69473	0.373492	14.548	0.000844729	0.0157354	3	4	Up-regulated
Sus_scrofa___TSPEAR	2.0783	0.478101	14.5426	0.000845025	0.0157354	3	4	Up-regulated
Sus_scrofa___STOX2	2.28956	1.87504	14.5082	0.00084594	0.0157408	3	4	Up-regulated
Sus_scrofa___ENSSSCG00000004150	1.62943	1.18899	14.487	0.000852963	0.0158361	3	4	Up-regulated
Sus_scrofa___SCARB2	0.992677	6.08338	14.4616	0.000855257	0.015867	3	4	Up-regulated
Sus_scrofa___ENSSSCG00000041670	2.37319	-1.90668	13.1241	0.000867693	0.0160738	3	4	Up-regulated
Sus_scrofa___AQP1	3.61746	0.757359	14.4406	0.000870326	0.016105	3	4	Up-regulated
Sus_scrofa___ERBIN	1.06045	8.65341	14.3976	0.0008736	0.0161372	3	4	Up-regulated
Sus_scrofa___INHA	1.56506	3.08922	14.3879	0.00087682	0.016183	3	4	Up-regulated
Sus_scrofa___PDZD8	0.671191	6.98692	14.3756	0.00088	0.0162298	3	4	Up-regulated
Sus_scrofa___SLC11A1	3.20042	-1.92693	13.0872	0.000881851	0.0162399	3	4	Up-regulated
Sus_scrofa___PMM1	1.43472	2.81177	14.3266	0.000895063	0.016447	3	4	Up-regulated
Papio_anubis_NME2	3.51438	-2.11656	13.2641	0.000900636	0.0165209	3	4	Up-regulated
Papio_anubis_CALU	2.67538	-1.34361	13.5275	0.000905253	0.0165733	3	4	Up-regulated
Sus_scrofa___ENSSSCG00000017509	3.28153	2.74286	14.2776	0.000910451	0.0166442	3	4	Up-regulated
Sus_scrofa___PARVA	0.787565	7.24923	14.2566	0.000915535	0.0166791	3	4	Up-regulated
Sus_scrofa___DBNDD2	0.891211	3.58822	14.2452	0.000919207	0.0167066	3	4	Up-regulated
Sus_scrofa___NUCB1	1.6764	0.361133	14.2854	0.000920153	0.0167117	3	4	Up-regulated
Sus_scrofa___NCK2	0.829251	5.75699	14.2344	0.000922342	0.0167164	3	4	Up-regulated
Sus_scrofa___FAM151B	1.0266	3.37415	14.2262	0.000925117	0.0167483	3	4	Up-regulated
Sus_scrofa___ARPC2	1.12712	5.59159	14.2082	0.000930448	0.0168252	3	4	Up-regulated
Sus_scrofa___CHCHD5	1.49264	1.06584	14.2306	0.000931111	0.0168252	3	4	Up-regulated
Sus_scrofa___WTIP	1.24742	4.94992	14.201	0.000932725	0.0168422	3	4	Up-regulated
Papio_anubis_CDC14A	2.35788	-0.503792	13.1486	0.000936245	0.0168936	3	4	Up-regulated
Sus_scrofa___DIRAS2	2.08552	-1.46779	13.4694	0.000946139	0.0170353	3	4	Up-regulated
Sus_scrofa___CLN6	0.94701	4.47593	14.1533	0.000947732	0.0170475	3	4	Up-regulated
Papio_anubis_CHCHD10	4.67545	-2.28299	14.4849	0.000953036	0.0171225	3	4	Up-regulated
Sus_scrofa___DPYSL3	1.48499	8.85261	14.1259	0.000956389	0.0171704	3	4	Up-regulated
Sus_scrofa___ACE2	1.48393	1.74187	14.1277	0.000958165	0.01719	3	4	Up-regulated
Sus_scrofa___ENSSSCG00000000097	0.804939	3.53862	14.0845	0.000969907	0.0173509	3	4	Up-regulated
Sus_scrofa___SPRED2	2.01959	6.37571	14.0732	0.000973406	0.0173886	3	4	Up-regulated
Sus_scrofa___KCNN3	1.05311	2.76291	14.0607	0.000978112	0.0174602	3	4	Up-regulated
Sus_scrofa___PREX1	2.30848	1.15367	14.0754	0.000983038	0.0175356	3	4	Up-regulated
Sus_scrofa___KCP	3.00743	1.02406	14.0614	0.000987101	0.0175956	3	4	Up-regulated
Sus_scrofa___ENSSSCG00000042304	2.67233	0.132172	14.0036	0.000998131	0.0177416	3	4	Up-regulated
Sus_scrofa___UBN1	0.667083	5.37873	13.9714	0.00100724	0.0178658	3	4	Up-regulated
Sus_scrofa___TAF5L	1.3444	5.08287	13.9714	0.00100726	0.0178658	3	4	Up-regulated
Papio_anubis_HBB	4.69509	-1.49185	12.9188	0.00100945	0.0178744	3	4	Up-regulated
Papio_anubis_SEC61G	5.24706	-2.69957	14.7881	0.00100959	0.0178744	3	4	Up-regulated
Papio_anubis_EIF1	3.73415	-1.70925	12.8623	0.00100989	0.0178744	3	4	Up-regulated
Sus_scrofa___BTG3	2.51122	1.78073	13.9721	0.00101188	0.0178844	3	4	Up-regulated
Sus_scrofa___ENSSSCG00000024009	4.21218	-1.43144	13.2441	0.00101464	0.017908	3	4	Up-regulated
Sus_scrofa___C3orf38	1.09332	4.99241	13.9399	0.00101798	0.017929	3	4	Up-regulated
Sus_scrofa___MARCHF3	1.39897	8.32353	13.9246	0.00102323	0.0179834	3	4	Up-regulated
Sus_scrofa___MYB	2.50618	0.108061	13.8945	0.00103983	0.018224	3	4	Up-regulated
Sus_scrofa___AREL1	0.758123	5.32944	13.8589	0.00104613	0.0182831	3	4	Up-regulated
Sus_scrofa___ANKRD1	1.7386	12.5354	13.8496	0.0010494	0.0183045	3	4	Up-regulated
Sus_scrofa___XPR1	1.99591	8.36049	13.8492	0.00104955	0.0183045	3	4	Up-regulated
Sus_scrofa___SLC25A33	1.32357	4.9234	13.8329	0.00105535	0.0183929	3	4	Up-regulated
Sus_scrofa___AFAP1	0.938979	6.62583	13.8259	0.00105784	0.0184235	3	4	Up-regulated
Sus_scrofa___SLCO6A1	4.30847	8.16021	13.8046	0.00106547	0.0185034	3	4	Up-regulated
Sus_scrofa___RFX3	1.1039	5.25389	13.8019	0.00106645	0.0185034	3	4	Up-regulated
Sus_scrofa___DIAPH1	1.07262	3.78414	13.7759	0.00107601	0.0186232	3	4	Up-regulated
Papio_anubis_ATP5MC1	3.08293	-0.886566	13.7054	0.00108214	0.0186967	3	4	Up-regulated
Sus_scrofa___FAM91A1	0.723926	5.31009	13.7569	0.00108281	0.0186967	3	4	Up-regulated
Sus_scrofa___ENSSSCG00000002950	0.874986	6.58943	13.7557	0.00108324	0.0186967	3	4	Up-regulated
Papio_anubis_ENAH	2.91451	-1.69526	12.7655	0.00109997	0.0189332	3	4	Up-regulated
Sus_scrofa___SHISA4	2.1123	1.8341	13.7096	0.00110365	0.0189835	3	4	Up-regulated
Sus_scrofa___OTOA	1.23304	2.52238	13.6909	0.00110811	0.0190343	3	4	Up-regulated
Sus_scrofa___PTGER4	2.9181	2.10529	13.678	0.00111515	0.0191288	3	4	Up-regulated
Sus_scrofa___ENSSSCG00000038200	2.07878	-0.730562	13.2455	0.0011172	0.0191508	3	4	Up-regulated
Sus_scrofa___ENSSSCG00000002281	0.856409	5.4041	13.6291	0.00113073	0.0193695	3	4	Up-regulated
Sus_scrofa___HPCAL1	1.22794	4.38897	13.6151	0.00113621	0.0194399	3	4	Up-regulated
Sus_scrofa___NSFL1C	0.742751	5.55327	13.6144	0.00113639	0.0194399	3	4	Up-regulated
Sus_scrofa___MACROD2	1.50141	7.20411	13.6097	0.0011382	0.0194402	3	4	Up-regulated
Sus_scrofa___MLXIP	1.05683	4.53525	13.6058	0.00113978	0.0194402	3	4	Up-regulated
Sus_scrofa___ANKFY1	0.696497	8.0426	13.6043	0.0011403	0.0194402	3	4	Up-regulated
Sus_scrofa___ENSSSCG00000049674	2.60524	1.21887	13.5717	0.00114399	0.0194767	3	4	Up-regulated
Sus_scrofa___ENSSSCG00000050627	1.02892	3.38998	13.5933	0.0011448	0.0194771	3	4	Up-regulated
Sus_scrofa___KCNQ5	2.48334	5.32336	13.5876	0.0011468	0.019498	3	4	Up-regulated
Sus_scrofa___EDEM1	1.10943	3.39487	13.5741	0.00115237	0.019547	3	4	Up-regulated
Sus_scrofa___CCN2	3.07124	5.34409	13.5727	0.00115268	0.019547	3	4	Up-regulated
Sus_scrofa___PPP2CB	0.694303	6.7826	13.5722	0.00115281	0.019547	3	4	Up-regulated
Sus_scrofa___CLCA2	2.13424	0.820189	13.5963	0.00115434	0.0195596	3	4	Up-regulated
Sus_scrofa___ENSSSCG00000035893	1.54932	2.13946	13.5619	0.00115846	0.0196029	3	4	Up-regulated
Sus_scrofa___TMED10	0.877891	5.65501	13.5353	0.00116739	0.019692	3	4	Up-regulated
Sus_scrofa___TSEN2	1.85211	5.50195	13.5346	0.00116766	0.019692	3	4	Up-regulated
pCMV_____gp40	6.88753	-2.41758	18.2699	0.00117511	0.019791	3	4	Up-regulated
Sus_scrofa___PSMB10	2.04534	1.47192	13.5248	0.00117711	0.0198115	3	4	Up-regulated
Sus_scrofa___ENSSSCG00000046695	2.92698	-2.51396	12.4561	0.00119066	0.0199857	3	4	Up-regulated
Sus_scrofa___ENSSSCG00000036529	0.726717	5.02746	13.4727	0.00119255	0.020004	3	4	Up-regulated
Sus_scrofa___TLR6	3.67663	-1.82603	12.5683	0.00120716	0.0201949	3	4	Up-regulated
Sus_scrofa___CHSY1	1.14114	5.19229	13.4251	0.00121208	0.0202502	3	4	Up-regulated
Sus_scrofa___TRAFD1	1.70513	5.13705	13.418	0.00121504	0.0202861	3	4	Up-regulated
Sus_scrofa___CEP112	1.18941	6.1064	13.4055	0.00122024	0.0203457	3	4	Up-regulated
Sus_scrofa___ATP2B4	1.30867	8.91135	13.3983	0.00122325	0.0203687	3	4	Up-regulated
Sus_scrofa___CD200R1	2.85478	-0.783628	12.8743	0.0012267	0.0204098	3	4	Up-regulated
Sus_scrofa___DOT1L	1.00226	6.43662	13.378	0.00123177	0.0204562	3	4	Up-regulated
Sus_scrofa___ENSSSCG00000040611	5.05194	-2.69666	12.7927	0.00123987	0.0205711	3	4	Up-regulated
pCMV_____gp35	5.7279	-2.82631	15.7974	0.00124033	0.0205711	3	4	Up-regulated
Sus_scrofa___INTS5	2.90233	-1.3523	12.6151	0.00124673	0.0206635	3	4	Up-regulated
Sus_scrofa___ARL5B	1.22441	4.36487	13.3404	0.00124782	0.0206678	3	4	Up-regulated
Sus_scrofa___SLC39A11	0.752224	5.89793	13.332	0.00125133	0.0206986	3	4	Up-regulated
Sus_scrofa___DPYD	1.08812	7.56416	13.3282	0.00125294	0.0207116	3	4	Up-regulated
Sus_scrofa___ARHGAP15	2.06565	1.43664	13.3413	0.0012567	0.0207463	3	4	Up-regulated
Sus_scrofa___ARCN1	0.726483	5.27996	13.3017	0.00126441	0.0208461	3	4	Up-regulated
Sus_scrofa___NTSR2	2.13889	0.993113	13.3269	0.00126653	0.0208673	3	4	Up-regulated
Sus_scrofa___MAF	2.24303	0.00371095	13.1913	0.00127305	0.0209537	3	4	Up-regulated
Sus_scrofa___SDC3	3.14564	-1.24685	12.395	0.00127345	0.0209537	3	4	Up-regulated
Papio_anubis_LMOD2	2.65665	-1.22913	12.7926	0.0012794	0.0210378	3	4	Up-regulated
Sus_scrofa___STAR	0.842612	4.01584	13.2567	0.00128417	0.0210905	3	4	Up-regulated
Sus_scrofa___UBALD1	1.90479	1.81669	13.261	0.00128533	0.0210905	3	4	Up-regulated
Sus_scrofa___ENSSSCG00000023041	2.23221	5.17914	13.2506	0.00128682	0.0210905	3	4	Up-regulated
pCMV_____gp25	8.75466	-1.29951	20.8052	0.0012886	0.0211059	3	4	Up-regulated
Sus_scrofa___NARF	1.05291	5.29985	13.222	0.00129948	0.0212562	3	4	Up-regulated
Sus_scrofa___MOB3C	1.73476	2.37078	13.1996	0.00131118	0.0214196	3	4	Up-regulated
Sus_scrofa___COMMD6	1.82539	10.9625	13.1863	0.00131554	0.0214628	3	4	Up-regulated
Sus_scrofa___CSNK1G1	0.786418	7.12628	13.1829	0.00131708	0.0214739	3	4	Up-regulated
Sus_scrofa___ENSSSCG00000000148	1.7101	1.8983	13.1798	0.00132106	0.0215249	3	4	Up-regulated
Sus_scrofa___PPP2R2C	1.68942	1.40075	13.18	0.00132597	0.0215844	3	4	Up-regulated
Sus_scrofa___TRPC6	2.01173	-0.666104	13.0877	0.00132644	0.0215844	3	4	Up-regulated
Sus_scrofa___ZNF484	1.52362	2.40345	13.1543	0.00133173	0.0216282	3	4	Up-regulated
Sus_scrofa___NET1	2.01718	2.05651	13.153	0.00133356	0.0216343	3	4	Up-regulated
Sus_scrofa___PTGFR	1.47101	4.61904	13.1393	0.00133707	0.0216429	3	4	Up-regulated
Sus_scrofa___ENSSSCG00000017103	2.10764	4.48493	13.1384	0.00133754	0.0216429	3	4	Up-regulated
Sus_scrofa___RHBDF2	1.85673	1.83478	13.1409	0.00133976	0.0216603	3	4	Up-regulated
Sus_scrofa___SLC20A2	1.23069	9.13541	13.128	0.00134223	0.0216862	3	4	Up-regulated
Sus_scrofa___ENSSSCG00000047274	1.80175	1.43602	13.1366	0.00134452	0.0216952	3	4	Up-regulated
Sus_scrofa___CLDND1	0.863975	5.58318	13.1167	0.00134744	0.0217284	3	4	Up-regulated
Papio_anubis_NRAP	2.21194	-0.29776	13.0623	0.00135203	0.0217883	3	4	Up-regulated
Sus_scrofa___GATA6	0.736786	9.11557	13.0986	0.00135591	0.0218227	3	4	Up-regulated
Sus_scrofa___TREX1	2.28249	0.674191	13.1233	0.0013579	0.0218407	3	4	Up-regulated
Sus_scrofa___CDKL2	2.26946	0.977772	13.1112	0.00136038	0.0218525	3	4	Up-regulated
pCMV_____gp06	7.352	-2.20143	20.3989	0.00136264	0.021856	3	4	Up-regulated
Sus_scrofa___CSRNP1	2.40797	1.89554	13.0936	0.00136321	0.021856	3	4	Up-regulated
Sus_scrofa___RTCA	1.04801	4.40649	13.0732	0.00136793	0.0219175	3	4	Up-regulated
Sus_scrofa___IFFO2	1.54862	1.2338	13.0948	0.00136994	0.0219357	3	4	Up-regulated
Sus_scrofa___ZC3H12A	1.56255	0.0435666	13.0937	0.00137097	0.0219382	3	4	Up-regulated
Papio_anubis_PPM1A	2.69152	-2.37623	12.1512	0.00137452	0.0219808	3	4	Up-regulated
Sus_scrofa___IFNAR1	1.036	4.74938	13.0572	0.00137548	0.0219812	3	4	Up-regulated
Sus_scrofa___CFL1	2.68907	0.885592	13.0797	0.0013763	0.0219812	3	4	Up-regulated
Sus_scrofa___CLTC	0.826995	7.25338	13.0438	0.00138181	0.0220551	3	4	Up-regulated
Sus_scrofa___SERPINB10	2.99029	-1.45098	12.1788	0.0013874	0.0221263	3	4	Up-regulated
Sus_scrofa___SDCBP	1.21542	4.50391	13.0285	0.00138924	0.0221263	3	4	Up-regulated
Sus_scrofa___ENSSSCG00000048793	1.86465	-0.539418	12.951	0.00138935	0.0221263	3	4	Up-regulated
Sus_scrofa___GNAS	2.8768	-1.55055	12.1931	0.00141453	0.022477	3	4	Up-regulated
Sus_scrofa___PDK1	1.10694	6.01061	12.9631	0.00142096	0.0225507	3	4	Up-regulated
Sus_scrofa___SEC14L1	1.24459	4.75189	12.9551	0.00142496	0.0225998	3	4	Up-regulated
Papio_anubis_DHX9	5.36369	-2.83063	13.6935	0.00142637	0.0226079	3	4	Up-regulated
Sus_scrofa___DAD1	0.926368	4.08796	12.9355	0.00143475	0.0226909	3	4	Up-regulated
Papio_anubis_CCDC112	3.95766	-2.8375	13.4805	0.00144809	0.0228653	3	4	Up-regulated
Sus_scrofa___CHCHD10	1.97951	4.75391	12.901	0.00145195	0.0228915	3	4	Up-regulated
Sus_scrofa___NR1D1	1.55445	2.86161	12.901	0.0014525	0.0228915	3	4	Up-regulated
Sus_scrofa___ENSSSCG00000039071	2.46003	0.295757	12.8453	0.00146665	0.0230564	3	4	Up-regulated
Sus_scrofa___ENSSSCG00000009133	2.63639	-1.65062	11.8458	0.00146856	0.0230719	3	4	Up-regulated
Sus_scrofa___GRHL1	2.25244	-0.29351	12.8344	0.00147562	0.0231539	3	4	Up-regulated
Sus_scrofa___COPZ2	1.24915	2.45803	12.8542	0.00147714	0.0231608	3	4	Up-regulated
Sus_scrofa___PPP1R12C	1.08461	5.5269	12.8354	0.0014854	0.0232146	3	4	Up-regulated
Sus_scrofa___ARL9	1.51113	1.1334	12.8472	0.00148834	0.0232369	3	4	Up-regulated
Sus_scrofa___ZNF274	0.884525	6.14271	12.8219	0.0014924	0.0232858	3	4	Up-regulated
pCMV_____gp49	8.6709	-1.29568	19.8631	0.00150147	0.0233665	3	4	Up-regulated
Sus_scrofa___ENSSSCG00000028092	2.82318	1.05019	12.8354	0.00150163	0.0233665	3	4	Up-regulated
Sus_scrofa___ENSSSCG00000032953	1.55771	1.98115	12.803	0.00150502	0.0233731	3	4	Up-regulated
Sus_scrofa___PNLDC1	2.01407	-0.422342	12.7954	0.00150529	0.0233731	3	4	Up-regulated
Sus_scrofa___VPS26C	0.799308	5.93928	12.7681	0.0015206	0.023506	3	4	Up-regulated
Sus_scrofa___RPS13	2.2898	0.700485	12.7999	0.00152207	0.023507	3	4	Up-regulated
Sus_scrofa___DPCD	0.908374	4.36343	12.762	0.00152396	0.023507	3	4	Up-regulated
Sus_scrofa___RNF19B	1.44607	5.01145	12.7611	0.00152443	0.023507	3	4	Up-regulated
Sus_scrofa___SLC35C2	1.30738	1.78726	12.7575	0.00152973	0.0235457	3	4	Up-regulated
Sus_scrofa___ZFAND4	1.72983	0.504181	12.7721	0.00152987	0.0235457	3	4	Up-regulated
Sus_scrofa___C20orf96	1.48622	1.62757	12.7696	0.00153164	0.0235457	3	4	Up-regulated
Sus_scrofa___FLNB	1.86215	3.72471	12.7455	0.00153304	0.0235528	3	4	Up-regulated
Sus_scrofa___UHMK1	0.959793	3.718	12.7398	0.00153594	0.0235539	3	4	Up-regulated
Sus_scrofa___KIAA0319	1.25573	3.34442	12.7208	0.00154621	0.0236534	3	4	Up-regulated
Sus_scrofa___SYNJ1	0.693483	5.86141	12.7178	0.00154758	0.0236599	3	4	Up-regulated
Sus_scrofa___ACKR3	4.86511	2.43939	12.6111	0.00155404	0.0237121	3	4	Up-regulated
Sus_scrofa___RPL24	1.31964	4.72073	12.7039	0.00155515	0.0237121	3	4	Up-regulated
Sus_scrofa___HP1BP3	0.624706	6.99415	12.7036	0.00155526	0.0237121	3	4	Up-regulated
Sus_scrofa___ENSSSCG00000016791	3.26261	0.167895	12.6956	0.00155573	0.0237121	3	4	Up-regulated
Sus_scrofa___DRAM2	1.03934	3.24135	12.7003	0.00155745	0.0237239	3	4	Up-regulated
pCMV_____gp61	8.23746	-1.63645	19.6484	0.0015592	0.023736	3	4	Up-regulated
Sus_scrofa___PSMD8	0.854653	3.32335	12.6348	0.00159345	0.0241839	3	4	Up-regulated
Sus_scrofa___SFMBT1	0.855613	5.78673	12.6301	0.00159578	0.024191	3	4	Up-regulated
pCMV_____gp32	8.34113	-1.60618	19.4912	0.00159981	0.0242364	3	4	Up-regulated
Sus_scrofa___PSMD12	0.735959	5.69516	12.6201	0.00160134	0.0242441	3	4	Up-regulated
Sus_scrofa___RTCB	1.01573	4.24988	12.6023	0.00161146	0.0243392	3	4	Up-regulated
Sus_scrofa___PLAGL2	1.27854	3.81727	12.5934	0.00161659	0.0244019	3	4	Up-regulated
Sus_scrofa___PHGDH	1.92795	-0.946573	12.3927	0.00162616	0.0245021	3	4	Up-regulated
Sus_scrofa___ENSSSCG00000011859	1.48451	2.38014	12.5668	0.00163337	0.0245782	3	4	Up-regulated
Sus_scrofa___VPS72	0.844604	4.59258	12.5624	0.00163416	0.0245782	3	4	Up-regulated
Sus_scrofa___STAMBP	0.80166	5.1482	12.5599	0.00163555	0.0245843	3	4	Up-regulated
Sus_scrofa___CHIC2	0.851871	6.38951	12.5577	0.0016368	0.0245883	3	4	Up-regulated
Sus_scrofa___MEMO1	0.687268	7.76975	12.5538	0.00163901	0.0246047	3	4	Up-regulated
Papio_anubis_U6-26	5.2343	-2.69069	11.4785	0.00163986	0.0246047	3	4	Up-regulated
Sus_scrofa___EML5	1.11643	5.9708	12.5457	0.00164369	0.0246475	3	4	Up-regulated
pCMV_____gp62	6.72011	-2.51053	18.9979	0.00164989	0.0247257	3	4	Up-regulated
Sus_scrofa___CASP10	1.69552	4.3672	12.5286	0.00165375	0.0247573	3	4	Up-regulated
Sus_scrofa___NUFIP2	0.608445	6.93291	12.5247	0.00165586	0.0247573	3	4	Up-regulated
pCMV_____gp47	6.47729	-2.59529	16.4866	0.00165681	0.0247573	3	4	Up-regulated
Sus_scrofa___TRIM72	2.03522	1.43397	12.5389	0.00165875	0.0247694	3	4	Up-regulated
Sus_scrofa___UMPS	0.825363	4.47994	12.5021	0.00166915	0.0248919	3	4	Up-regulated
Sus_scrofa___RAP2A	1.89056	1.87057	12.5034	0.00167215	0.0248953	3	4	Up-regulated
Sus_scrofa___OSTM1	0.982303	2.95693	12.4696	0.00168889	0.0250848	3	4	Up-regulated
Sus_scrofa___MAP1LC3A	1.36978	4.48379	12.4649	0.00169115	0.0251035	3	4	Up-regulated
Sus_scrofa___ARF4	0.968486	5.09207	12.4462	0.00170224	0.0252358	3	4	Up-regulated
Sus_scrofa___ENSSSCG00000005247	2.1627	4.66457	12.4423	0.00170465	0.0252358	3	4	Up-regulated
Sus_scrofa___MAP2K2	0.860552	4.44961	12.4416	0.00170511	0.0252358	3	4	Up-regulated
Sus_scrofa___PKM	0.650814	7.10213	12.4304	0.00171175	0.0253191	3	4	Up-regulated
Sus_scrofa___ENSSSCG00000007525	1.0177	2.2901	12.418	0.00172103	0.0254414	3	4	Up-regulated
Sus_scrofa___TTI2	0.715653	4.84692	12.4126	0.00172254	0.0254487	3	4	Up-regulated
Sus_scrofa___LNX2	1.25103	3.61621	12.4061	0.00172681	0.0254967	3	4	Up-regulated
Sus_scrofa___ENSSSCG00000027115	0.650123	6.77534	12.3922	0.00173495	0.0255764	3	4	Up-regulated
Sus_scrofa___FYB1	1.59036	1.32548	12.408	0.00173591	0.0255764	3	4	Up-regulated
Sus_scrofa___ENSSSCG00000038630	1.29064	1.8984	12.3941	0.0017363	0.0255764	3	4	Up-regulated
Sus_scrofa___AEN	1.20825	2.82207	12.3623	0.00175416	0.0257637	3	4	Up-regulated
Sus_scrofa___PSMD1	0.722624	7.71098	12.3504	0.00176075	0.0257951	3	4	Up-regulated
Sus_scrofa___IL13RA2	1.38158	0.934428	12.3681	0.00176145	0.0257951	3	4	Up-regulated
Papio_anubis_EIF3M	4.52748	-2.59305	15.1937	0.00176726	0.0258454	3	4	Up-regulated
Sus_scrofa___ETAA1	0.786972	4.19881	12.3373	0.00176901	0.0258454	3	4	Up-regulated
Sus_scrofa___NCS1	2.30177	1.65002	12.3351	0.0017783	0.0259184	3	4	Up-regulated
Sus_scrofa___C3orf62	1.42749	2.66305	12.3211	0.00178036	0.0259203	3	4	Up-regulated
Sus_scrofa___ZDHHC20	0.819199	6.357	12.3083	0.00178715	0.0259738	3	4	Up-regulated
Sus_scrofa___SEC23B	0.906733	4.70886	12.3035	0.00179025	0.0259903	3	4	Up-regulated
Sus_scrofa___TGFBRAP1	0.792283	4.8254	12.3	0.00179247	0.0259903	3	4	Up-regulated
Sus_scrofa___ENSSSCG00000038359	1.6078	1.89894	12.3036	0.00179364	0.0259903	3	4	Up-regulated
Sus_scrofa___STIM1	1.86069	0.858713	12.3184	0.00179838	0.0260313	3	4	Up-regulated
Sus_scrofa___ARL8B	0.746874	6.09897	12.2871	0.0018006	0.0260483	3	4	Up-regulated
Sus_scrofa___ENSSSCG00000005358	1.34657	6.16128	12.2686	0.00181244	0.0262045	3	4	Up-regulated
Sus_scrofa___CAMK1	1.05152	2.80855	12.2576	0.00182041	0.026259	3	4	Up-regulated
pCMV_____gp04	6.4126	-2.63808	18.2169	0.00182668	0.0263191	3	4	Up-regulated
Sus_scrofa___CNTFR	2.49863	-0.0774048	12.2307	0.00185595	0.0266948	3	4	Up-regulated
Sus_scrofa___HNRNPR	0.841879	7.17591	12.1698	0.00187713	0.0269221	3	4	Up-regulated
Sus_scrofa___C9orf40	1.19864	2.60143	12.1661	0.00188097	0.0269527	3	4	Up-regulated
Sus_scrofa___CLIC4	1.57801	9.45561	12.1634	0.00188142	0.0269527	3	4	Up-regulated
Sus_scrofa___FLT1	1.98216	3.48819	12.1617	0.00188368	0.0269626	3	4	Up-regulated
Sus_scrofa___CLIP1	0.638818	9.07274	12.1547	0.00188723	0.0269688	3	4	Up-regulated
Sus_scrofa___SPRY1	2.23348	3.3877	12.1537	0.00188857	0.0269688	3	4	Up-regulated
Sus_scrofa___TOPAZ1	0.957007	7.03953	12.1526	0.00188867	0.0269688	3	4	Up-regulated
Sus_scrofa___ACTN4	0.99874	8.09767	12.1157	0.0019136	0.0272887	3	4	Up-regulated
pCMV_____gp50	8.06499	-1.79832	18.4079	0.00192439	0.0274269	3	4	Up-regulated
Sus_scrofa___F11R	4.1213	-2.15504	11.3259	0.00194336	0.0276256	3	4	Up-regulated
Sus_scrofa___NF2	0.903242	5.73665	12.0147	0.00198378	0.0280255	3	4	Up-regulated
Sus_scrofa___CAPG	2.10101	0.868625	12.0066	0.00200399	0.0282399	3	4	Up-regulated
Sus_scrofa___RICTOR	0.915155	9.12686	11.9675	0.00201753	0.0284146	3	4	Up-regulated
Sus_scrofa___ENSSSCG00000014280	1.19904	7.66105	11.9508	0.0020296	0.0285277	3	4	Up-regulated
Sus_scrofa___ENSSSCG00000039871	3.11055	-1.78228	11.274	0.0020304	0.0285277	3	4	Up-regulated
Sus_scrofa___RRP15	1.00751	6.26905	11.9486	0.00203126	0.0285277	3	4	Up-regulated
Sus_scrofa___PAPOLA	0.613364	7.78892	11.9288	0.00204566	0.0286717	3	4	Up-regulated
Sus_scrofa___ASCC3	0.836119	7.57292	11.9282	0.00204609	0.0286717	3	4	Up-regulated
Sus_scrofa___SLC16A13	3.54449	-1.84435	10.9489	0.00204854	0.0286739	3	4	Up-regulated
Sus_scrofa___PCDH19	3.55705	-1.08464	11.4505	0.00205225	0.0287097	3	4	Up-regulated
Sus_scrofa___ENSSSCG00000004945	2.1267	2.56701	11.9063	0.00206346	0.0288021	3	4	Up-regulated
Sus_scrofa___ENSSSCG00000022842	3.26179	0.116826	11.9151	0.00206598	0.0288212	3	4	Up-regulated
Sus_scrofa___ENSSSCG00000004670	2.34418	-0.877071	11.625	0.00207403	0.0289174	3	4	Up-regulated
Sus_scrofa___MYO7B	1.72933	2.50769	11.8902	0.00207603	0.0289245	3	4	Up-regulated
Sus_scrofa___GMFB	1.02408	2.56809	11.8867	0.002078	0.0289245	3	4	Up-regulated
Sus_scrofa___VAV2	1.49924	4.00723	11.88	0.00208195	0.0289516	3	4	Up-regulated
pCMV_____gp09	7.6008	-2.04771	17.9306	0.00208333	0.0289516	3	4	Up-regulated
Sus_scrofa___RHOU	2.53117	0.564977	11.7851	0.00209616	0.0290868	3	4	Up-regulated
Sus_scrofa___NIBAN2	1.55077	3.3514	11.8399	0.00211254	0.0292426	3	4	Up-regulated
Papio_anubis_MTCH1	3.37735	-2.73193	11.0025	0.00211537	0.0292655	3	4	Up-regulated
Sus_scrofa___ITIH4	3.3352	-0.138609	11.8237	0.00212771	0.0293642	3	4	Up-regulated
Sus_scrofa___PDCL3	0.780168	4.62735	11.8191	0.00212789	0.0293642	3	4	Up-regulated
Sus_scrofa___PPRC1	1.20812	3.80322	11.8187	0.00212837	0.0293642	3	4	Up-regulated
Sus_scrofa___SNX24	0.8881	6.88377	11.8001	0.00214238	0.0294925	3	4	Up-regulated
Sus_scrofa___C10orf67	1.2729	2.1444	11.7946	0.00214899	0.0295672	3	4	Up-regulated
Sus_scrofa___ARHGAP31	1.0388	6.03422	11.7895	0.00215057	0.0295728	3	4	Up-regulated
Sus_scrofa___ENSSSCG00000015814	1.91994	2.11179	11.7926	0.00215189	0.0295746	3	4	Up-regulated
Sus_scrofa___GOLT1B	1.52509	2.11197	11.7862	0.00215573	0.0296111	3	4	Up-regulated
Sus_scrofa___IDI1	1.76129	1.46382	11.7825	0.00216285	0.0296763	3	4	Up-regulated
Sus_scrofa___C15orf39	2.14904	1.91736	11.7718	0.00216997	0.0297577	3	4	Up-regulated
Sus_scrofa___ENSSSCG00000016186	2.14468	2.86927	11.762	0.00217312	0.0297683	3	4	Up-regulated
Sus_scrofa___SH3BP4	1.92061	1.03732	11.7669	0.00218786	0.0298885	3	4	Up-regulated
Sus_scrofa___ENSSSCG00000049617	1.86916	-0.407744	11.6924	0.00219679	0.029994	3	4	Up-regulated
Sus_scrofa___ENSSSCG00000004441	4.02012	1.39845	11.7423	0.0022003	0.0300256	3	4	Up-regulated
Sus_scrofa___RPS11	2.75974	2.74313	11.721	0.00220578	0.0300796	3	4	Up-regulated
Sus_scrofa___SPACA3	2.97451	1.06606	11.7374	0.00220839	0.0300868	3	4	Up-regulated
Sus_scrofa___TIGD4	1.40726	0.517451	11.7287	0.00221845	0.0302074	3	4	Up-regulated
pCMV_____gp65	6.29181	-2.68389	17.0534	0.00222477	0.0302605	3	4	Up-regulated
Sus_scrofa___SLC5A1	0.774782	4.71289	11.6923	0.00222737	0.0302787	3	4	Up-regulated
Sus_scrofa___MSMO1	1.3919	2.28708	11.6819	0.00223851	0.0303813	3	4	Up-regulated
Sus_scrofa___NDUFA4L2	1.38285	0.0555977	11.6963	0.00224189	0.0304108	3	4	Up-regulated
Sus_scrofa___AMMECR1L	0.775013	4.48375	11.6595	0.00225387	0.0305534	3	4	Up-regulated
Sus_scrofa___BMPR2	0.797731	8.38376	11.652	0.00225992	0.0305725	3	4	Up-regulated
pCMV_____gp56	7.42382	-2.1507	17.4319	0.0022678	0.0306459	3	4	Up-regulated
Sus_scrofa___IER5	1.54496	3.64077	11.6409	0.00226931	0.0306498	3	4	Up-regulated
Sus_scrofa___LMOD2	1.21623	8.42451	11.6313	0.00227691	0.0307193	3	4	Up-regulated
Sus_scrofa___PSMB7	0.74151	5.7044	11.6265	0.00228089	0.0307564	3	4	Up-regulated
Sus_scrofa___EIF4EBP1	1.16446	3.72349	11.5975	0.00230544	0.0310038	3	4	Up-regulated
Papio_anubis_HSPA4	2.70669	-2.03815	10.715	0.00231855	0.0311467	3	4	Up-regulated
Papio_anubis_FBXL5	2.91224	-2.4139	10.7156	0.00232018	0.0311519	3	4	Up-regulated
Sus_scrofa___SDR42E1	1.67846	1.12943	11.5931	0.0023243	0.0311878	3	4	Up-regulated
Sus_scrofa___NDUFB7	2.33638	2.23854	11.5542	0.00234545	0.0314121	3	4	Up-regulated
Papio_anubis_CERT1	2.03198	-2.05288	10.9316	0.00234724	0.0314121	3	4	Up-regulated
Sus_scrofa___UBASH3B	1.91274	0.091474	11.5419	0.00235122	0.0314121	3	4	Up-regulated
Sus_scrofa___ZNF385A	2.02637	-0.503906	11.5317	0.00235908	0.0314883	3	4	Up-regulated
Sus_scrofa___ABCG2	1.29809	4.55257	11.5311	0.00236121	0.0315001	3	4	Up-regulated
Sus_scrofa___MAP1LC3B	0.789541	5.19526	11.5229	0.00236815	0.0315254	3	4	Up-regulated
Sus_scrofa___CAPZA1	0.556688	6.64467	11.514	0.0023758	0.0316035	3	4	Up-regulated
Sus_scrofa___SCD	6.25808	-0.548439	11.6735	0.00237654	0.0316035	3	4	Up-regulated
Sus_scrofa___MICU3	0.754162	7.56133	11.5044	0.00238409	0.0316303	3	4	Up-regulated
pCMV_____gp24	7.43259	-2.16496	17.1566	0.00238464	0.0316303	3	4	Up-regulated
Sus_scrofa___ENSSSCG00000012101	2.16968	-0.508523	11.4689	0.00238488	0.0316303	3	4	Up-regulated
Sus_scrofa___BZW2	0.891296	7.87083	11.494	0.00239313	0.031723	3	4	Up-regulated
Sus_scrofa___TM4SF18	3.74771	-1.97704	10.9918	0.00239503	0.0317289	3	4	Up-regulated
Sus_scrofa___CYP2S1	3.44684	-1.90477	10.7868	0.00239612	0.0317289	3	4	Up-regulated
Sus_scrofa___UPP1	2.60849	2.49173	11.4829	0.00241039	0.0318841	3	4	Up-regulated
Sus_scrofa___DHX9	0.692491	6.38808	11.4703	0.00241381	0.0319125	3	4	Up-regulated
Sus_scrofa___DDX11	1.15373	3.66868	11.4646	0.00241916	0.0319466	3	4	Up-regulated
Sus_scrofa___CHUK	0.701713	4.68473	11.4621	0.00242108	0.0319466	3	4	Up-regulated
Sus_scrofa___SNX19	0.880278	4.74552	11.4577	0.002425	0.0319592	3	4	Up-regulated
Sus_scrofa___NDN	1.80038	-1.34988	10.738	0.00242828	0.0319856	3	4	Up-regulated
Sus_scrofa___NANS	0.708268	5.73319	11.452	0.00242994	0.0319906	3	4	Up-regulated
Sus_scrofa___SSR3	0.961501	5.63026	11.4452	0.00243596	0.0320362	3	4	Up-regulated
Sus_scrofa___CCDC6	1.4432	9.01943	11.4367	0.00244353	0.0321188	3	4	Up-regulated
Sus_scrofa___PRDX1	1.02472	3.52018	11.4289	0.00245084	0.0321811	3	4	Up-regulated
Sus_scrofa___NRIP2	3.38781	-2.25103	10.5058	0.00245754	0.0322377	3	4	Up-regulated
pCMV_____gp59	7.29864	-2.23395	16.9682	0.00245773	0.0322377	3	4	Up-regulated
Sus_scrofa___NFKBIZ	3.17768	-0.525352	11.1018	0.00245971	0.0322469	3	4	Up-regulated
Sus_scrofa___CEP44	1.15845	3.16419	11.4164	0.00246231	0.032264	3	4	Up-regulated
Sus_scrofa___EIF4H	0.657621	6.38459	11.402	0.0024746	0.0323613	3	4	Up-regulated
Sus_scrofa___GTF2B	0.667702	5.27625	11.4017	0.00247491	0.0323613	3	4	Up-regulated
Sus_scrofa___PHF11	1.28354	6.70653	11.3995	0.00247686	0.0323699	3	4	Up-regulated
Sus_scrofa___CPNE2	2.56743	-0.102495	11.3602	0.00249044	0.0325055	3	4	Up-regulated
Sus_scrofa___NUDCD1	1.82051	6.00444	11.3837	0.00249113	0.0325055	3	4	Up-regulated
Papio_anubis_P4HA1	2.7227	-2.61652	10.8266	0.00249265	0.0325083	3	4	Up-regulated
Sus_scrofa___ZNF518B	1.44523	2.21582	11.3822	0.00249479	0.032516	3	4	Up-regulated
Sus_scrofa___MAP3K8	1.56702	3.24173	11.3778	0.00249713	0.032516	3	4	Up-regulated
Sus_scrofa___WIPF2	0.878026	5.61851	11.3673	0.00250608	0.0325647	3	4	Up-regulated
Sus_scrofa___SLCO3A1	0.901266	9.78804	11.3658	0.00250746	0.0325658	3	4	Up-regulated
pCMV_____gp52	7.31919	-2.22566	16.8496	0.00251401	0.0326174	3	4	Up-regulated
Sus_scrofa___TMEM185B	2.93475	-2.63663	10.4869	0.00251404	0.0326174	3	4	Up-regulated
Sus_scrofa___ATP6V0D1	0.740904	4.19857	11.3445	0.00252716	0.0327536	3	4	Up-regulated
Sus_scrofa___HNRNPLL	0.669458	6.18403	11.3317	0.00253887	0.0328714	3	4	Up-regulated
Sus_scrofa___FUT10	1.08511	5.36773	11.3273	0.00254302	0.0328793	3	4	Up-regulated
Sus_scrofa___ENSSSCG00000005768	0.88466	4.81843	11.3272	0.00254312	0.0328793	3	4	Up-regulated
Sus_scrofa___C19orf38	1.39935	0.327435	11.3522	0.00254343	0.0328793	3	4	Up-regulated
Sus_scrofa___PI4K2B	0.999392	5.41652	11.2814	0.00258604	0.0332755	3	4	Up-regulated
Sus_scrofa___RIPPLY1	1.83837	1.67343	11.2875	0.00258766	0.0332793	3	4	Up-regulated
Sus_scrofa___KLHL42	1.28441	3.55044	11.273	0.00259438	0.0333485	3	4	Up-regulated
Sus_scrofa___ENSSSCG00000031979	4.56526	-2.74554	10.5037	0.00261776	0.0335972	3	4	Up-regulated
Sus_scrofa___ENSSSCG00000014600	1.20844	5.09631	11.2302	0.00263504	0.0337325	3	4	Up-regulated
Sus_scrofa___CALU	1.16735	6.82477	11.2284	0.00263671	0.0337366	3	4	Up-regulated
Sus_scrofa___YPEL5	0.967417	5.46017	11.2207	0.0026442	0.0338035	3	4	Up-regulated
Sus_scrofa___HSD11B1L	3.37597	3.51427	11.2217	0.00264463	0.0338035	3	4	Up-regulated
Papio_anubis_ATP5F1B	2.14838	-0.719415	10.8073	0.00265349	0.033882	3	4	Up-regulated
pCMV_____gp17	7.03786	-2.35879	16.4785	0.00266059	0.0339036	3	4	Up-regulated
Sus_scrofa___SLC1A7	2.44356	-1.71212	10.5377	0.00266368	0.0339084	3	4	Up-regulated
Sus_scrofa___DNTTIP2	0.734629	4.41965	11.1888	0.00267535	0.034009	3	4	Up-regulated
Sus_scrofa___ENSSSCG00000027421	2.03964	-1.89472	10.4632	0.00267575	0.034009	3	4	Up-regulated
Sus_scrofa___ENSSSCG00000012886	1.09893	1.6049	11.1911	0.00267952	0.0340235	3	4	Up-regulated
Sus_scrofa___CREB5	1.2443	9.6336	11.1754	0.00268844	0.0341022	3	4	Up-regulated
Sus_scrofa___CD47	0.851902	7.49604	11.1657	0.00269805	0.0342068	3	4	Up-regulated
Sus_scrofa___SLC22A3	1.57489	9.02234	11.1486	0.00271506	0.0343712	3	4	Up-regulated
Sus_scrofa___WFDC1	1.70195	7.13257	11.1485	0.00271514	0.0343712	3	4	Up-regulated
Sus_scrofa___TRPM6	1.29789	3.99073	11.1316	0.00273233	0.034519	3	4	Up-regulated
Sus_scrofa___CFAP300	2.24689	3.82662	11.1275	0.0027366	0.0345554	3	4	Up-regulated
Papio_anubis_SLC39A10	5.35949	-2.89623	12.3214	0.00273804	0.0345562	3	4	Up-regulated
Sus_scrofa___STX7	0.733112	5.86635	11.1133	0.00275053	0.0346788	3	4	Up-regulated
Sus_scrofa___NAMPT	0.813715	6.65052	11.1107	0.00275322	0.0346872	3	4	Up-regulated
pCMV_____gp66	6.5072	-2.60319	16.0768	0.00275396	0.0346872	3	4	Up-regulated
Sus_scrofa___ENSSSCG00000000359	1.75865	2.77513	11.1029	0.00276258	0.0347607	3	4	Up-regulated
Sus_scrofa___SH3BGRL2	1.97006	0.109829	11.0714	0.00276861	0.0348016	3	4	Up-regulated
Sus_scrofa___CD101	2.16827	0.0542696	11.05	0.00277965	0.0348878	3	4	Up-regulated
Sus_scrofa___RPS3A	2.08295	3.4061	11.0764	0.0027888	0.0349669	3	4	Up-regulated
Sus_scrofa___ENSSSCG00000038413	3.39225	-1.62464	10.4004	0.00279398	0.0349799	3	4	Up-regulated
Sus_scrofa___RBPJ	0.786149	6.75725	11.069	0.00279582	0.0349855	3	4	Up-regulated
Sus_scrofa___AP3S2	1.00623	1.05929	11.077	0.00280068	0.0350182	3	4	Up-regulated
Sus_scrofa___DDX3X	1.28211	6.7072	11.0598	0.00280525	0.0350509	3	4	Up-regulated
Sus_scrofa___SLC39A10	1.00422	6.72247	11.0552	0.00281008	0.0350937	3	4	Up-regulated
Sus_scrofa___TBC1D10A	0.959416	2.59084	11.0527	0.00281436	0.0351296	3	4	Up-regulated
Sus_scrofa___RIPK1	0.675448	4.85947	11.0481	0.00281749	0.0351512	3	4	Up-regulated
pCMV_____gp23	6.88753	-2.43301	16.113	0.00282612	0.0351887	3	4	Up-regulated
Sus_scrofa___PHF23	1.73113	2.3036	11.0396	0.0028283	0.0351984	3	4	Up-regulated
Sus_scrofa___TAF10	1.91378	1.51434	11.0167	0.00285866	0.0354177	3	4	Up-regulated
Sus_scrofa___NHLRC3	0.688241	8.13357	11	0.00286793	0.0355149	3	4	Up-regulated
Sus_scrofa___WDR1	0.945564	5.16634	10.9855	0.00288333	0.0356703	3	4	Up-regulated
Sus_scrofa___SRRM4	1.86559	5.59699	10.9792	0.00289001	0.0357321	3	4	Up-regulated
pCMV_____gp67	6.86622	-2.44139	15.9875	0.00289118	0.0357321	3	4	Up-regulated
Sus_scrofa___ENSSSCG00000035037	2.50023	5.40973	10.9755	0.00289405	0.0357499	3	4	Up-regulated
Sus_scrofa___ENSSSCG00000024974	2.74754	3.68607	10.9658	0.00290493	0.03586	3	4	Up-regulated
Sus_scrofa___H2AZ2	0.70875	4.7291	10.9645	0.00290583	0.03586	3	4	Up-regulated
Sus_scrofa___STK4	0.778361	3.98517	10.9624	0.00290822	0.0358718	3	4	Up-regulated
Sus_scrofa___RFLNA	1.77118	-0.0167742	10.9712	0.00293341	0.036112	3	4	Up-regulated
Sus_scrofa___CHP1	0.785879	4.95945	10.9389	0.00293346	0.036112	3	4	Up-regulated
Sus_scrofa___CXCL11	3.25731	-0.0861637	10.3425	0.00295295	0.0363162	3	4	Up-regulated
Sus_scrofa___TRAF3	1.17448	4.43075	10.9086	0.00296671	0.0364675	3	4	Up-regulated
Sus_scrofa___CADPS2	2.28691	3.65193	10.9023	0.00297446	0.036527	3	4	Up-regulated
Sus_scrofa___ABRA	1.76157	8.00654	10.8996	0.0029764	0.0365328	3	4	Up-regulated
Sus_scrofa___CHD1	0.587939	6.84935	10.8944	0.00298219	0.0365857	3	4	Up-regulated
Sus_scrofa___EREG	2.48208	1.1453	10.9099	0.00298363	0.0365857	3	4	Up-regulated
Sus_scrofa___GOLGB1	0.689721	7.15898	10.8865	0.00299096	0.0366576	3	4	Up-regulated
Sus_scrofa___PSMD7	0.787352	4.80423	10.8791	0.00299929	0.0367237	3	4	Up-regulated
Papio_anubis_ENSPANG00000021905	4.56997	-2.86915	10.4044	0.00300554	0.0367822	3	4	Up-regulated
Sus_scrofa___TTC28	0.789133	9.2765	10.8641	0.00301595	0.0368611	3	4	Up-regulated
Sus_scrofa___MACIR	1.18793	3.33947	10.863	0.00301788	0.0368611	3	4	Up-regulated
Sus_scrofa___VMP1	0.82882	7.16173	10.857	0.00302392	0.0368989	3	4	Up-regulated
Sus_scrofa___GASK1A	2.01852	-0.274911	10.8752	0.00302811	0.0369301	3	4	Up-regulated
pCMV_____gp39	7.23602	-2.24608	15.8426	0.00303225	0.0369301	3	4	Up-regulated
Sus_scrofa___TOR3A	1.17988	3.2908	10.8487	0.00303385	0.0369301	3	4	Up-regulated
Sus_scrofa___ENSSSCG00000039365	3.06793	-1.99305	10.0119	0.00303808	0.0369584	3	4	Up-regulated
Sus_scrofa___SC5D	1.34424	1.06765	10.8551	0.00304061	0.0369584	3	4	Up-regulated
Sus_scrofa___RANBP6	1.04019	6.34324	10.8394	0.00304369	0.0369779	3	4	Up-regulated
Sus_scrofa___ENSSSCG00000022176	2.29846	1.41799	10.8435	0.00304887	0.0369855	3	4	Up-regulated
Sus_scrofa___PCK2	1.40419	0.17549	10.8526	0.00305023	0.0369855	3	4	Up-regulated
Sus_scrofa___C1RL	1.36921	1.33207	10.8445	0.00305362	0.0369981	3	4	Up-regulated
Sus_scrofa___ETS2	1.98944	6.27083	10.8262	0.00305865	0.0370338	3	4	Up-regulated
Sus_scrofa___ITGA10	1.16339	3.42462	10.8111	0.00307638	0.0371906	3	4	Up-regulated
Sus_scrofa___FZD6	1.60744	2.9595	10.8109	0.00307706	0.0371906	3	4	Up-regulated
Sus_scrofa___EPHX4	1.97454	3.09724	10.8019	0.00308714	0.0372706	3	4	Up-regulated
Papio_anubis_PDK4	2.70265	-1.97869	9.92628	0.00309327	0.0372813	3	4	Up-regulated
pCMV_____gp60	7.13835	-2.29932	15.7174	0.00309399	0.0372813	3	4	Up-regulated
Sus_scrofa___ZMYM6	0.704102	5.26647	10.7749	0.00311761	0.037459	3	4	Up-regulated
pCMV_____gp34	6.65789	-2.53659	15.5095	0.00312379	0.037514	3	4	Up-regulated
Sus_scrofa___PLEKHS1	1.98235	1.93777	10.7533	0.00314909	0.0377634	3	4	Up-regulated
Sus_scrofa___GP91-PHOX	0.861597	2.63316	10.7458	0.00315287	0.0377906	3	4	Up-regulated
Papio_anubis_ENSPANG00000022507	4.21737	-2.32862	10.1413	0.00316552	0.0378878	3	4	Up-regulated
Sus_scrofa___ENSSSCG00000011272	1.91013	3.67385	10.7272	0.00317393	0.0379522	3	4	Up-regulated
Sus_scrofa___RPL7	3.10395	2.54225	10.7268	0.00317902	0.0379949	3	4	Up-regulated
Sus_scrofa___PHF21B	1.64546	3.90547	10.7156	0.00318752	0.038051	3	4	Up-regulated
Sus_scrofa___DCTN5	0.727943	4.06513	10.7097	0.00319456	0.038051	3	4	Up-regulated
Sus_scrofa___CD58	0.931536	6.413	10.7089	0.00319519	0.038051	3	4	Up-regulated
Sus_scrofa___YEATS4	0.951652	3.25085	10.7094	0.00319542	0.038051	3	4	Up-regulated
Sus_scrofa___CHP2	2.74414	-2.42066	9.87621	0.00319642	0.038051	3	4	Up-regulated
pCMV_____gp68	6.85436	-2.45415	15.4696	0.00319644	0.038051	3	4	Up-regulated
Papio_anubis_ENSPANG00000030915	4.60146	-2.81623	10.0176	0.00319661	0.038051	3	4	Up-regulated
Sus_scrofa___PRKCB	1.08581	3.04397	10.7073	0.00319808	0.038051	3	4	Up-regulated
Papio_anubis_U6-12	4.19003	-2.82733	11.2782	0.00320984	0.0380904	3	4	Up-regulated
Papio_anubis_XIRP2	4.60146	-2.98398	10.8922	0.00321427	0.0381249	3	4	Up-regulated
Sus_scrofa___ENSSSCG00000039656	2.50998	-1.65344	10.0428	0.00322496	0.0381649	3	4	Up-regulated
Sus_scrofa___LAMTOR2	1.5995	0.670515	10.7005	0.00322527	0.0381649	3	4	Up-regulated
Sus_scrofa___TSC22D2	1.12333	8.13445	10.6643	0.00324889	0.0384081	3	4	Up-regulated
Sus_scrofa___ENTPD4	0.752307	4.56147	10.6519	0.00326414	0.0385338	3	4	Up-regulated
Sus_scrofa___DYNC1LI1	0.725222	5.00564	10.6337	0.00328634	0.0387716	3	4	Up-regulated
Sus_scrofa___LAD1	1.92553	-0.422354	10.4951	0.00328738	0.0387716	3	4	Up-regulated
Sus_scrofa___DNAJC25	0.739045	4.40156	10.6275	0.00329401	0.0388098	3	4	Up-regulated
Sus_scrofa___MAPKAPK2	0.750302	6.7863	10.6236	0.00329874	0.038814	3	4	Up-regulated
Sus_scrofa___HHAT	1.35311	3.64891	10.621	0.00330242	0.0388391	3	4	Up-regulated
Sus_scrofa___SLC25A14	1.28478	2.6844	10.6166	0.00330891	0.0388971	3	4	Up-regulated
pCMV_____gp57	6.79134	-2.47349	15.2577	0.00331942	0.0389989	3	4	Up-regulated
Sus_scrofa___ZDHHC13	0.897949	3.64782	10.6062	0.00332068	0.0389989	3	4	Up-regulated
Sus_scrofa___CYP2R1	1.60989	-0.0934079	10.6061	0.00333082	0.0390744	3	4	Up-regulated
Sus_scrofa___TOM1	0.797173	6.72913	10.5957	0.00333343	0.0390753	3	4	Up-regulated
Sus_scrofa___NFIL3	3.01636	5.03266	10.593	0.00333691	0.0390978	3	4	Up-regulated
Sus_scrofa___VPS13A	0.622595	7.04644	10.582	0.00335051	0.0392021	3	4	Up-regulated
Sus_scrofa___ACCSL	0.699338	5.82695	10.5806	0.00335235	0.0392053	3	4	Up-regulated
Sus_scrofa___ZDHHC18	0.775626	4.03875	10.5767	0.00335752	0.0392107	3	4	Up-regulated
Sus_scrofa___ACAP2	1.35415	7.4816	10.5662	0.00337042	0.0393064	3	4	Up-regulated
Sus_scrofa___SS18	0.655304	7.57413	10.5584	0.00338025	0.039366	3	4	Up-regulated
Sus_scrofa___ZNHIT2	1.93002	-1.49325	9.87061	0.003389	0.0394495	3	4	Up-regulated
Sus_scrofa___ENSSSCG00000044948	4.80921	-2.66165	10.1633	0.00340145	0.0395393	3	4	Up-regulated
Papio_anubis_TNNC1	2.01656	-0.40245	10.5196	0.00341075	0.039629	3	4	Up-regulated
Sus_scrofa___ENSSSCG00000004024	2.55418	-1.4329	10.0767	0.00341305	0.0396373	3	4	Up-regulated
Sus_scrofa___JUNB	3.27873	-0.555332	10.3557	0.00341691	0.0396621	3	4	Up-regulated
Sus_scrofa___GPR174	1.8382	-0.665772	10.4796	0.00341836	0.0396621	3	4	Up-regulated
Sus_scrofa___SERTAD3	1.6742	1.89273	10.5232	0.00343007	0.0397427	3	4	Up-regulated
Sus_scrofa___SLC6A5	2.02763	-1.30983	10.1862	0.00343824	0.039819	3	4	Up-regulated
Sus_scrofa___ENSSSCG00000040694	2.50299	-1.39374	10.0931	0.00345173	0.0399382	3	4	Up-regulated
Sus_scrofa___CCDC50	0.809056	5.46174	10.4979	0.00345802	0.0399926	3	4	Up-regulated
Sus_scrofa___CYB5A	1.68149	6.05353	10.4922	0.00346546	0.0400564	3	4	Up-regulated
Sus_scrofa___NYX	1.41099	2.98769	10.4921	0.00346674	0.0400564	3	4	Up-regulated
Sus_scrofa___MIF	2.46601	1.83127	10.4942	0.00347375	0.0401188	3	4	Up-regulated
Sus_scrofa___ENSSSCG00000031787	1.02207	1.04386	10.4873	0.00348756	0.0402089	3	4	Up-regulated
Sus_scrofa___VANGL1	0.800161	4.11364	10.4749	0.00348827	0.0402089	3	4	Up-regulated
Papio_anubis_U6-615	2.53662	-2.29232	9.52063	0.00349437	0.0402456	3	4	Up-regulated
Sus_scrofa___CTTNBP2NL	0.839307	3.99704	10.4602	0.00350768	0.0403803	3	4	Up-regulated
Sus_scrofa___HES1	1.84184	3.17439	10.4492	0.00352359	0.0405448	3	4	Up-regulated
Sus_scrofa___MEX3D	1.46695	0.655064	10.4639	0.00352848	0.0405637	3	4	Up-regulated
Sus_scrofa___LYSMD3	0.715522	5.10248	10.4413	0.00353247	0.040591	3	4	Up-regulated
Sus_scrofa___ZNF184	0.862365	3.22183	10.4313	0.00354652	0.0407291	3	4	Up-regulated
Sus_scrofa___IL10RA	2.85701	5.64187	10.4286	0.00354936	0.0407291	3	4	Up-regulated
Papio_anubis_RPS27	5.23005	-2.55146	10.2946	0.00355968	0.0407913	3	4	Up-regulated
Sus_scrofa___ZNF710	0.70533	5.24203	10.4156	0.00356687	0.0408363	3	4	Up-regulated
Sus_scrofa___PTK7	1.65797	1.30334	10.4161	0.00357854	0.0409137	3	4	Up-regulated
Sus_scrofa___PPARG	2.64693	4.40744	10.404	0.00358285	0.0409443	3	4	Up-regulated
Sus_scrofa___NCKAP1	0.628676	7.77973	10.3972	0.0035916	0.0410069	3	4	Up-regulated
Sus_scrofa___MGAT3	2.17777	-0.262681	10.3541	0.00359394	0.0410149	3	4	Up-regulated
Sus_scrofa___PLBD2	0.761022	3.81192	10.3733	0.00362447	0.0413003	3	4	Up-regulated
Sus_scrofa___ENSSSCG00000034230	0.738668	4.82398	10.3723	0.00362555	0.0413003	3	4	Up-regulated
Sus_scrofa___ATP1B1	1.12105	8.76206	10.3663	0.0036338	0.0413439	3	4	Up-regulated
Sus_scrofa___DNAJA4	1.41565	5.17053	10.3634	0.0036378	0.0413645	3	4	Up-regulated
Sus_scrofa___TSPAN3	0.857245	5.80609	10.3471	0.00366019	0.0415624	3	4	Up-regulated
Sus_scrofa___DEPDC1B	1.38992	2.90745	10.3458	0.00366341	0.0415801	3	4	Up-regulated
Sus_scrofa___DNASE1L1	1.03137	2.67181	10.332	0.00368324	0.0417484	3	4	Up-regulated
Sus_scrofa___ARL15	0.859033	7.20586	10.3291	0.00368522	0.041752	3	4	Up-regulated
Sus_scrofa___ENSSSCG00000025485	2.00473	-0.561887	10.2118	0.00369568	0.0418224	3	4	Up-regulated
pCMV_____gp14	6.31652	-2.67456	14.5102	0.00369881	0.0418224	3	4	Up-regulated
Sus_scrofa___ENSSSCG00000033744	2.44802	0.58648	10.3233	0.0037033	0.0418431	3	4	Up-regulated
Sus_scrofa___ENSSSCG00000048901	2.11262	-0.226514	10.2481	0.00371521	0.0419587	3	4	Up-regulated
Sus_scrofa___FLRT3	2.52001	0.0993056	10.2489	0.00373428	0.0420792	3	4	Up-regulated
Sus_scrofa___ARHGAP23	0.813357	6.15425	10.2903	0.00373974	0.0421217	3	4	Up-regulated
Sus_scrofa___GPR176	1.24448	6.35367	10.2851	0.00374713	0.0421524	3	4	Up-regulated
Sus_scrofa___SLC5A4	1.54295	3.37049	10.283	0.00375073	0.0421696	3	4	Up-regulated
Sus_scrofa___ENSSSCG00000051352	1.90482	0.225556	10.3086	0.00375371	0.0421842	3	4	Up-regulated
Sus_scrofa___FAM180A	1.83829	2.65609	10.2806	0.00375745	0.0422072	3	4	Up-regulated
Sus_scrofa___ENSSSCG00000040499	3.49287	-2.44951	9.49285	0.00376102	0.0422094	3	4	Up-regulated
Sus_scrofa___WAPL	0.637488	6.97186	10.2718	0.00376597	0.0422272	3	4	Up-regulated
Sus_scrofa___RPLP2	1.68272	3.15062	10.2656	0.00377579	0.0423182	3	4	Up-regulated
Sus_scrofa___PCDH1	4.58712	-2.63118	9.50611	0.00378067	0.0423247	3	4	Up-regulated
Sus_scrofa___ENSSSCG00000017971	1.59419	1.87348	10.2591	0.00379084	0.042373	3	4	Up-regulated
Sus_scrofa___ACSL4	1.10428	6.11184	10.2497	0.00379767	0.0423998	3	4	Up-regulated
Sus_scrofa___ACSM5	5.9469	4.6085	10.2537	0.00380097	0.0423998	3	4	Up-regulated
Sus_scrofa___POLR3E	0.796111	4.31368	10.2458	0.00380349	0.0423998	3	4	Up-regulated
Sus_scrofa___IGF1R	0.894356	11.4764	10.2438	0.00380622	0.0423998	3	4	Up-regulated
Sus_scrofa___RASSF5	1.99122	1.20382	10.2462	0.00381428	0.0424455	3	4	Up-regulated
Sus_scrofa___SEC22B	0.766434	4.4501	10.2325	0.00382262	0.0425195	3	4	Up-regulated
Sus_scrofa___ATP5F1D	1.28975	3.96583	10.2297	0.00382682	0.0425473	3	4	Up-regulated
pCMV_____gp70	6.18851	-2.72137	14.2358	0.00385822	0.0428203	3	4	Up-regulated
Sus_scrofa___CMTM4	1.23516	3.49973	10.195	0.00387784	0.0429999	3	4	Up-regulated
Sus_scrofa___P4HB	0.965626	3.69483	10.1935	0.00388008	0.0430028	3	4	Up-regulated
pCMV_____gp41	7.41598	-2.13734	14.6259	0.00388154	0.0430028	3	4	Up-regulated
Sus_scrofa___SLC7A1	0.962973	4.4349	10.1864	0.00389023	0.0430537	3	4	Up-regulated
Sus_scrofa___PDXP	1.94476	-1.00736	9.94239	0.00389588	0.0430676	3	4	Up-regulated
Sus_scrofa___MRPS9	0.600125	6.1487	10.1824	0.00389599	0.0430676	3	4	Up-regulated
Sus_scrofa___SEC24A	0.520881	6.35829	10.1797	0.00390004	0.0430933	3	4	Up-regulated
Sus_scrofa___ENSSSCG00000016629	0.762352	8.99869	10.1782	0.00390225	0.0430961	3	4	Up-regulated
Sus_scrofa___CYP20A1	0.702813	7.93401	10.1772	0.00390374	0.0430961	3	4	Up-regulated
Sus_scrofa___DNAJA1	0.98939	3.87347	10.172	0.00391183	0.0431474	3	4	Up-regulated
Sus_scrofa___C1QTNF2	1.45642	1.40784	10.176	0.00391603	0.0431697	3	4	Up-regulated
Sus_scrofa___BICDL2	2.69888	1.85078	10.1766	0.00392414	0.0431821	3	4	Up-regulated
Sus_scrofa___FGFBP1	5.0339	-2.90509	10.9063	0.00394593	0.0433674	3	4	Up-regulated
Sus_scrofa___SLC25A17	0.607735	5.55396	10.148	0.00394737	0.0433674	3	4	Up-regulated
Sus_scrofa___CSE1L	0.876143	6.19803	10.1435	0.00395411	0.0433919	3	4	Up-regulated
Papio_anubis_ENSPANG00000031934	2.57422	-2.09075	9.4181	0.00395496	0.0433919	3	4	Up-regulated
pCMV_____gp38	6.13402	-2.74039	14.0511	0.00398536	0.0436212	3	4	Up-regulated
Sus_scrofa___ARL2BP	1.03306	2.37531	10.1214	0.00399027	0.0436471	3	4	Up-regulated
Sus_scrofa___DYSF	0.976547	7.86417	10.1133	0.00399977	0.0437319	3	4	Up-regulated
Sus_scrofa___TMSB4X	2.50729	-2.32515	9.55599	0.00400372	0.043756	3	4	Up-regulated
Sus_scrofa___OTUD1	2.55347	4.03636	10.1094	0.00400611	0.043763	3	4	Up-regulated
Sus_scrofa___EMP1	5.23998	-0.0240016	9.86748	0.00401243	0.0438129	3	4	Up-regulated
Sus_scrofa___H2AC11	3.0257	-2.46766	9.21506	0.0040548	0.0441792	3	4	Up-regulated
Sus_scrofa___ABHD2	1.24055	9.30615	10.0722	0.00406291	0.0442098	3	4	Up-regulated
Sus_scrofa___ZNF507	0.955803	2.05822	10.0679	0.00407354	0.0442677	3	4	Up-regulated
Sus_scrofa___MRPS2	0.872671	2.77725	10.056	0.00408945	0.0443886	3	4	Up-regulated
Sus_scrofa___SLC31A2	1.33755	1.22905	10.06	0.00409863	0.0444631	3	4	Up-regulated
Sus_scrofa___MED15	0.808204	5.09845	10.0478	0.00410106	0.0444702	3	4	Up-regulated
Sus_scrofa___ENSSSCG00000002825	2.13122	1.2237	9.95191	0.00412515	0.0446927	3	4	Up-regulated
Papio_anubis_ENSPANG00000029483	3.83868	-2.42157	9.60599	0.00412832	0.0447076	3	4	Up-regulated
Sus_scrofa___ENSSSCG00000033720	1.40996	1.96875	10.0319	0.0041407	0.0448029	3	4	Up-regulated
Sus_scrofa___WASF2	0.881452	7.34919	10.0203	0.00414427	0.0448047	3	4	Up-regulated
Sus_scrofa___KISS1	2.34396	-1.96171	9.28235	0.00414444	0.0448047	3	4	Up-regulated
Sus_scrofa___RPS23	2.17779	2.97992	10.0184	0.0041489	0.0448335	3	4	Up-regulated
Sus_scrofa___FCER1G	1.71998	-0.138737	10.0233	0.00415931	0.0448523	3	4	Up-regulated
Sus_scrofa___APLP2	0.59118	6.45553	10.0107	0.0041596	0.0448523	3	4	Up-regulated
Sus_scrofa___PMAIP1	3.44099	-1.10747	9.36951	0.00416016	0.0448523	3	4	Up-regulated
Papio_anubis_ENSPANG00000048037	5.91449	-0.860206	10.2252	0.00416139	0.0448523	3	4	Up-regulated
pCMV_____gp29	5.9936	-2.78806	13.7538	0.00416904	0.0448871	3	4	Up-regulated
Sus_scrofa___MAD2L2	2.07057	0.283068	10.0237	0.00416999	0.0448871	3	4	Up-regulated
Sus_scrofa___ENSSSCG00000009341	0.577135	8.68731	9.99652	0.00418217	0.0449102	3	4	Up-regulated
Sus_scrofa___ENSSSCG00000049923	2.29737	-1.2911	9.54683	0.00419921	0.045008	3	4	Up-regulated
Sus_scrofa___SAYSD1	1.30633	-0.300043	9.96235	0.00420117	0.0450097	3	4	Up-regulated
Sus_scrofa___RAP1B	0.943244	6.8358	9.9785	0.00421112	0.0450888	3	4	Up-regulated
Papio_anubis_ABCB10	4.76449	-3.03	11.0008	0.00421215	0.0450888	3	4	Up-regulated
Sus_scrofa___VWC2	2.48487	3.3929	9.96738	0.00422999	0.0452411	3	4	Up-regulated
Sus_scrofa___UBE2W	0.562593	7.24964	9.96682	0.00423	0.0452411	3	4	Up-regulated
Sus_scrofa___CD151	1.90309	1.83149	9.95264	0.00425921	0.0454952	3	4	Up-regulated
Sus_scrofa___TMEM192	0.921628	3.17509	9.93124	0.004289	0.04574	3	4	Up-regulated
Sus_scrofa___TNFRSF21	1.98408	0.016251	9.94711	0.00428907	0.04574	3	4	Up-regulated
pCMV_____gp05	6.08676	-2.75782	13.6824	0.00429127	0.04574	3	4	Up-regulated
Sus_scrofa___SYT14	1.56396	3.61631	9.92488	0.0042991	0.0457731	3	4	Up-regulated
Sus_scrofa___NEMP1	0.909626	2.05179	9.9262	0.00430048	0.0457731	3	4	Up-regulated
Papio_anubis_PDLIM3	2.5442	0.768457	9.9273	0.00430169	0.0457731	3	4	Up-regulated
Sus_scrofa___SMNDC1	0.837266	4.5006	9.91494	0.00431512	0.0458515	3	4	Up-regulated
Sus_scrofa___RFNG	1.49714	1.70327	9.91736	0.0043183	0.0458515	3	4	Up-regulated
Sus_scrofa___CLOCK	0.658351	8.15848	9.91078	0.00432188	0.0458515	3	4	Up-regulated
Sus_scrofa___NUPR1	1.11374	2.73425	9.90336	0.0043359	0.0459419	3	4	Up-regulated
Papio_anubis_UBE2D2	2.96503	-1.52825	9.17485	0.00434118	0.0459605	3	4	Up-regulated
Sus_scrofa___GMEB1	0.722239	4.33601	9.89918	0.00434135	0.0459605	3	4	Up-regulated
Sus_scrofa___FNDC3A	0.605346	7.65391	9.89798	0.00434317	0.0459605	3	4	Up-regulated
Sus_scrofa___NSD2	0.853487	5.11047	9.8893	0.00435775	0.0460588	3	4	Up-regulated
Sus_scrofa___KIF2A	0.861409	5.45458	9.88678	0.00436193	0.0460588	3	4	Up-regulated
Sus_scrofa___HSPBAP1	0.832315	4.76978	9.88589	0.0043635	0.0460588	3	4	Up-regulated
Sus_scrofa___ENSSSCG00000012241	1.25367	3.63201	9.86946	0.00439148	0.0463151	3	4	Up-regulated
Sus_scrofa___TTPAL	0.956673	2.56133	9.86326	0.00440343	0.046402	3	4	Up-regulated
Sus_scrofa___SLC43A2	1.80057	2.32315	9.86533	0.00440535	0.0464027	3	4	Up-regulated
Sus_scrofa___ELOB	1.99237	2.54043	9.85921	0.00441051	0.0464374	3	4	Up-regulated
pCMV_____gp27	5.96971	-2.79681	13.4697	0.00442467	0.046546	3	4	Up-regulated
Sus_scrofa___TMEM161B	0.817768	7.1035	9.84859	0.0044264	0.046546	3	4	Up-regulated
Sus_scrofa___NPFFR1	2.05264	-0.029113	9.83459	0.00444072	0.046677	3	4	Up-regulated
Sus_scrofa___ARMC5	1.52545	0.309204	9.85677	0.00445338	0.0467722	3	4	Up-regulated
Sus_scrofa___MRAP2	1.44162	0.121687	9.85317	0.00445352	0.0467722	3	4	Up-regulated
Sus_scrofa___UBTD2	1.1575	4.50555	9.8251	0.00446677	0.0468213	3	4	Up-regulated
Sus_scrofa___PSMC6	0.621989	7.4561	9.82303	0.00447015	0.0468213	3	4	Up-regulated
Sus_scrofa___S100A10	2.93404	1.34757	9.84181	0.00447043	0.0468213	3	4	Up-regulated
Sus_scrofa___CALCOCO2	0.64998	7.03695	9.82111	0.00447347	0.0468213	3	4	Up-regulated
Sus_scrofa___HSPA14	0.766792	4.4767	9.82089	0.00447402	0.0468213	3	4	Up-regulated
Sus_scrofa___PDLIM3	2.55368	-0.0225513	9.66538	0.00447436	0.0468213	3	4	Up-regulated
Sus_scrofa___DYRK1A	0.785418	9.29665	9.8202	0.00447502	0.0468213	3	4	Up-regulated
Sus_scrofa___CTDP1	0.765684	4.07338	9.81052	0.00449201	0.0469577	3	4	Up-regulated
Sus_scrofa___ACSS3	1.11639	10.993	9.80608	0.00449944	0.0469577	3	4	Up-regulated
Sus_scrofa___MAPK6	0.67726	5.82725	9.80339	0.00450412	0.0469686	3	4	Up-regulated
Sus_scrofa___RHEB	1.4296	7.58809	9.79557	0.00451769	0.0470681	3	4	Up-regulated
Sus_scrofa___C11orf52	1.60562	3.31283	9.79471	0.00451993	0.0470681	3	4	Up-regulated
Sus_scrofa___CAMSAP2	0.728985	5.69479	9.79358	0.00452119	0.0470681	3	4	Up-regulated
Sus_scrofa___HBQ1	2.98753	-2.06411	9.02702	0.00456	0.047413	3	4	Up-regulated
Sus_scrofa___WT1	4.56997	-1.97432	9.46544	0.00456269	0.0474213	3	4	Up-regulated
Sus_scrofa___TRAPPC13	0.598464	5.97441	9.7679	0.00456618	0.0474378	3	4	Up-regulated
Sus_scrofa___GPX3	3.50433	0.861154	9.78516	0.00456928	0.0474504	3	4	Up-regulated
Sus_scrofa___PIGA	1.09188	3.74459	9.76137	0.00457806	0.0475218	3	4	Up-regulated
Sus_scrofa___ENSSSCG00000007617	0.975168	4.92406	9.75543	0.00458828	0.0476081	3	4	Up-regulated
Sus_scrofa___HSP90AB1	1.54193	4.16199	9.75308	0.00459263	0.0476336	3	4	Up-regulated
Sus_scrofa___ENSSSCG00000037595	1.06404	4.01053	9.74799	0.00460173	0.0477082	3	4	Up-regulated
Papio_anubis_BRD2	4.56997	-3.03847	10.3346	0.00460847	0.0477582	3	4	Up-regulated
Sus_scrofa___SSR4	2.9237	0.490937	9.76572	0.00461148	0.0477696	3	4	Up-regulated
Sus_scrofa___ENSSSCG00000009670	1.23259	0.635046	9.74829	0.00462791	0.0479002	3	4	Up-regulated
Sus_scrofa___MCF2	1.41534	0.527156	9.74472	0.00464241	0.0480106	3	4	Up-regulated
Sus_scrofa___CDC27	0.640491	6.83523	9.72249	0.00464693	0.0480375	3	4	Up-regulated
Sus_scrofa___PRR14L	0.668202	5.61177	9.71848	0.00465417	0.0480924	3	4	Up-regulated
Sus_scrofa___PNRC1	0.874247	6.7598	9.7132	0.00466365	0.0481394	3	4	Up-regulated
Sus_scrofa___ENSSSCG00000008241	3.13457	-1.24105	9.15851	0.00466821	0.0481394	3	4	Up-regulated
Papio_anubis_VAV3	4.40772	-2.97761	9.84774	0.00466994	0.0481394	3	4	Up-regulated
Sus_scrofa___PLK2	1.73117	4.41412	9.70901	0.00467144	0.0481394	3	4	Up-regulated
Sus_scrofa___SNRPD1	1.28046	2.05116	9.70927	0.00467589	0.0481394	3	4	Up-regulated
Sus_scrofa___VIM	2.55485	-1.59537	9.22799	0.00467602	0.0481394	3	4	Up-regulated
Sus_scrofa___KIFBP	0.719342	4.71005	9.70383	0.00468068	0.0481675	3	4	Up-regulated
Sus_scrofa___ENSSSCG00000003621	0.844497	2.92454	9.69624	0.00469561	0.0483013	3	4	Up-regulated
Sus_scrofa___TUSC3	0.669645	6.94601	9.6939	0.00469858	0.048312	3	4	Up-regulated
Sus_scrofa___MAMLD1	1.12206	5.012	9.68989	0.00470597	0.0483463	3	4	Up-regulated
Papio_anubis_NLGN2	4.2065	-2.61508	9.2077	0.00470947	0.0483463	3	4	Up-regulated
Sus_scrofa___M6PR	0.666014	4.22466	9.68795	0.00470965	0.0483463	3	4	Up-regulated
Sus_scrofa___ANKRD35	1.44341	-0.0515646	9.69784	0.00471326	0.04836	3	4	Up-regulated
Sus_scrofa___KCTD15	1.71049	1.25713	9.69503	0.00471484	0.04836	3	4	Up-regulated
Sus_scrofa___NUMB	0.58087	7.11291	9.6764	0.00473051	0.0484656	3	4	Up-regulated
Sus_scrofa___ENSSSCG00000035080	2.18828	2.90055	9.67716	0.00473094	0.0484656	3	4	Up-regulated
pCMV_____gp80	5.77217	-2.85756	13.0373	0.00473451	0.0484822	3	4	Up-regulated
Sus_scrofa___STX18	0.66135	6.18068	9.67287	0.004737	0.0484878	3	4	Up-regulated
Sus_scrofa___OPALIN	1.79432	-0.18973	9.63947	0.00474579	0.048558	3	4	Up-regulated
Sus_scrofa___NTAN1	1.31746	2.4179	9.6616	0.00476084	0.0486722	3	4	Up-regulated
Papio_anubis_FOXJ3	2.21376	2.16525	9.66466	0.00476417	0.0486864	3	4	Up-regulated
Sus_scrofa___TUBB2B	1.812	3.26024	9.654	0.00477256	0.0487521	3	4	Up-regulated
Sus_scrofa___COL5A3	2.07068	0.58773	9.67002	0.00478347	0.0488401	3	4	Up-regulated
Sus_scrofa___TAPT1	0.713545	5.38288	9.64681	0.00478507	0.0488401	3	4	Up-regulated
Sus_scrofa___ADCY9	0.733903	6.80856	9.64529	0.00478786	0.0488403	3	4	Up-regulated
Sus_scrofa___ATP8	3.12474	-0.731541	9.29729	0.00478899	0.0488403	3	4	Up-regulated
Sus_scrofa___MICOS13	1.81555	1.76342	9.64631	0.00479388	0.0488702	3	4	Up-regulated
Sus_scrofa___PRSS23	2.67503	1.72877	9.63992	0.0048126	0.0490411	3	4	Up-regulated
pCMV_____gp07	5.89021	-2.81935	13.042	0.00481609	0.0490567	3	4	Up-regulated
Papio_anubis_YTHDF2	2.30587	-2.30569	9.03742	0.00482738	0.0491317	3	4	Up-regulated
Sus_scrofa___ST8SIA2	2.93833	-1.18781	9.16134	0.00484456	0.0492664	3	4	Up-regulated
Sus_scrofa___ENSSSCG00000004830	3.07037	1.43806	9.62461	0.00485223	0.0493045	3	4	Up-regulated
Sus_scrofa___IQGAP2	1.77139	2.16648	9.60475	0.00486917	0.0494364	3	4	Up-regulated
Sus_scrofa___ENSSSCG00000033388	1.4579	2.42087	9.59867	0.00487784	0.0494843	3	4	Up-regulated
Sus_scrofa___ENSSSCG00000031838	1.1344	4.90241	9.59269	0.0048867	0.049537	3	4	Up-regulated
pCMV_____gp30	4.90979	-3.05739	12.352	0.004887	0.049537	3	4	Up-regulated
Sus_scrofa___PEAR1	2.57328	-1.2554	9.2668	0.00491258	0.0497213	3	4	Up-regulated
Sus_scrofa___ENSSSCG00000051243	1.50472	0.850634	9.5819	0.00493531	0.0499256	3	4	Up-regulated
Papio_anubis_HSP90AB1	3.62798	-2.56968	8.82751	0.00493774	0.0499284	3	4	Up-regulated
Sus_scrofa___SRC	1.06778	4.62364	9.56336	0.00494272	0.04994	3	4	Up-regulated
Sus_scrofa___GALP	-5.50917	0.652444	95.4956	5.86778e-12	4.8951e-08	3	4	Down-regulated
Sus_scrofa___ADAMTSL1	-4.06394	7.7907	99.8081	4.54707e-10	1.62571e-06	3	4	Down-regulated
Sus_scrofa___RNF207	-3.20332	6.58019	79.6467	3.98453e-09	5.79992e-06	3	4	Down-regulated
Sus_scrofa___ENSSSCG00000036306	-5.93012	2.67729	75.2444	5.93055e-09	7.42119e-06	3	4	Down-regulated
Sus_scrofa___DAPL1	-4.77876	4.58089	73.5613	8.43018e-09	9.5901e-06	3	4	Down-regulated
Sus_scrofa___ENSSSCG00000036052	-2.38724	9.38478	66.934	1.97501e-08	1.83069e-05	3	4	Down-regulated
Sus_scrofa___ENSSSCG00000013504	-3.61206	0.225408	60.8135	2.89445e-08	2.42863e-05	3	4	Down-regulated
Sus_scrofa___LRRC3B	-4.32101	2.10503	58.598	6.16484e-08	3.35658e-05	3	4	Down-regulated
Sus_scrofa___AUTS2	-3.0551	8.83661	56.9836	8.17397e-08	3.85981e-05	3	4	Down-regulated
Sus_scrofa___ZBTB7C	-4.01909	5.33161	56.1571	9.28171e-08	4.18443e-05	3	4	Down-regulated
Sus_scrofa___ENSSSCG00000038605	-5.24081	3.24365	54.7482	1.06417e-07	4.42135e-05	3	4	Down-regulated
Sus_scrofa___CBR3	-7.27408	0.679736	46.3673	1.37951e-07	5.07722e-05	3	4	Down-regulated
Sus_scrofa___SMTN	-2.82617	5.57582	52.2864	1.70258e-07	5.53383e-05	3	4	Down-regulated
Sus_scrofa___MYBPC3	-2.36175	10.8581	50.293	2.35661e-07	6.76645e-05	3	4	Down-regulated
Sus_scrofa___RNF135	-3.19591	3.79644	47.8737	3.55603e-07	8.98958e-05	3	4	Down-regulated
Sus_scrofa___ADRA1A	-5.21785	6.54601	47.7609	3.61185e-07	9.03938e-05	3	4	Down-regulated
Sus_scrofa___ENSSSCG00000009595	-3.83792	2.11438	47.7818	3.6606e-07	9.07068e-05	3	4	Down-regulated
Sus_scrofa___KCND3	-3.89583	5.46242	46.8774	4.20587e-07	9.65691e-05	3	4	Down-regulated
Sus_scrofa___CATSPERG	-1.72656	4.04901	46.6524	4.37474e-07	9.95334e-05	3	4	Down-regulated
Sus_scrofa___SLC38A5	-3.6659	0.862151	46.0988	4.53777e-07	0.000101399	3	4	Down-regulated
Sus_scrofa___PRKCG	-5.47906	3.63947	45.8972	4.89872e-07	0.000107544	3	4	Down-regulated
Sus_scrofa___NTM	-4.11495	5.29632	45.4629	5.391e-07	0.000113379	3	4	Down-regulated
Sus_scrofa___ZDHHC8	-3.30144	3.03264	45.2815	5.60918e-07	0.000114339	3	4	Down-regulated
Sus_scrofa___TRIP13	-1.80801	3.64925	45.2326	5.61939e-07	0.000114339	3	4	Down-regulated
Sus_scrofa___SEMA4C	-2.71212	1.52553	44.6555	6.19405e-07	0.0001198	3	4	Down-regulated
Sus_scrofa___ENSSSCG00000035617	-3.07149	6.25239	43.7465	7.33197e-07	0.000133071	3	4	Down-regulated
Sus_scrofa___JADE1	-2.26347	8.41005	43.1948	8.10863e-07	0.000144605	3	4	Down-regulated
Sus_scrofa___CPXM2	-2.98441	3.25801	40.8453	1.26393e-06	0.000197703	3	4	Down-regulated
Sus_scrofa___ENSSSCG00000051591	-5.17575	4.92435	40.5996	1.32282e-06	0.000203106	3	4	Down-regulated
Sus_scrofa___KCNIP2	-4.40753	5.33453	40.238	1.41335e-06	0.000209301	3	4	Down-regulated
Sus_scrofa___INSC	-2.92184	3.84952	39.8013	1.53911e-06	0.000222655	3	4	Down-regulated
Sus_scrofa___DGAT1	-2.21887	2.79813	39.7585	1.55673e-06	0.00022391	3	4	Down-regulated
Sus_scrofa___ENOX1	-3.0909	9.37737	39.2438	1.71189e-06	0.000238019	3	4	Down-regulated
Sus_scrofa___MYLIP	-2.37716	4.7354	38.9814	1.80296e-06	0.000246572	3	4	Down-regulated
Sus_scrofa___ROS1	-4.85106	3.72531	37.9127	2.23645e-06	0.00029242	3	4	Down-regulated
Sus_scrofa___RPL22	-2.01767	6.54813	37.6939	2.32564e-06	0.000298481	3	4	Down-regulated
Sus_scrofa___ALDH5A1	-2.73526	4.46714	37.2358	2.55118e-06	0.000319242	3	4	Down-regulated
Sus_scrofa___ENSSSCG00000016365	-3.02737	0.205507	36.225	2.67842e-06	0.000332954	3	4	Down-regulated
Sus_scrofa___TSPAN11	-3.01091	2.18062	37.0259	2.69339e-06	0.000332954	3	4	Down-regulated
Sus_scrofa___ENSSSCG00000048752	-3.04375	4.22274	36.9601	2.70067e-06	0.000332954	3	4	Down-regulated
Sus_scrofa___RORA	-1.84159	9.43287	36.8913	2.73392e-06	0.000334885	3	4	Down-regulated
Sus_scrofa___ENSSSCG00000041142	-3.53722	1.39639	36.5964	2.84292e-06	0.000338809	3	4	Down-regulated
Sus_scrofa___CDH9	-5.51959	5.02655	36.6072	2.90534e-06	0.000344566	3	4	Down-regulated
Sus_scrofa___ELL3	-3.72499	0.559533	35.3193	2.92283e-06	0.000344566	3	4	Down-regulated
Sus_scrofa___FNDC1	-4.2502	4.45638	35.9146	3.34841e-06	0.000379189	3	4	Down-regulated
Sus_scrofa___GRB14	-1.7483	6.91498	35.7924	3.42427e-06	0.000384301	3	4	Down-regulated
Sus_scrofa___ASB11	-3.37346	4.93567	35.7693	3.44225e-06	0.000384595	3	4	Down-regulated
Sus_scrofa___PAXBP1	-1.214	7.61514	35.6443	3.53079e-06	0.000388109	3	4	Down-regulated
Sus_scrofa___ENSSSCG00000042693	-4.12866	0.963542	34.9505	3.55293e-06	0.000388109	3	4	Down-regulated
Sus_scrofa___ENSSSCG00000042294	-3.3391	-0.450006	33.9267	3.61013e-06	0.000391129	3	4	Down-regulated
Sus_scrofa___RHOT1	-1.1231	8.54331	35.2641	3.82139e-06	0.000408709	3	4	Down-regulated
Sus_scrofa___ELP1	-1.17342	5.4632	35.2119	3.86353e-06	0.000411458	3	4	Down-regulated
Sus_scrofa___ENSSSCG00000039004	-1.06546	5.14552	34.2074	4.77456e-06	0.000483777	3	4	Down-regulated
Sus_scrofa___HPS4	-1.62374	3.85808	33.9874	5.00689e-06	0.000497252	3	4	Down-regulated
Sus_scrofa___ANKRD66	-2.85848	-0.60472	28.9619	5.2374e-06	0.000516049	3	4	Down-regulated
Sus_scrofa___RAPGEF5	-1.65221	8.09923	33.6841	5.33893e-06	0.00052399	3	4	Down-regulated
Sus_scrofa___PLEKHM3	-1.629	8.30912	33.5585	5.48495e-06	0.000530007	3	4	Down-regulated
Sus_scrofa___SLC2A4RG	-3.25565	2.29192	33.3665	5.76303e-06	0.000546331	3	4	Down-regulated
Sus_scrofa___HMCN1	-4.98939	6.28862	33.2385	5.88079e-06	0.000553303	3	4	Down-regulated
Papio_anubis_RBFOX1	-3.37239	0.278436	31.7674	6.09633e-06	0.000569302	3	4	Down-regulated
Sus_scrofa___ENSSSCG00000047248	-4.98973	-1.6617	27.8973	6.19005e-06	0.000575904	3	4	Down-regulated
Sus_scrofa___IGSF1	-2.68638	1.09206	32.8083	6.43935e-06	0.000592492	3	4	Down-regulated
Sus_scrofa___COG1	-1.22653	5.08918	32.7936	6.47407e-06	0.000593504	3	4	Down-regulated
Sus_scrofa___ENSSSCG00000006213	-1.60657	4.73297	32.6448	6.68871e-06	0.000610943	3	4	Down-regulated
Sus_scrofa___DPT	-6.25135	3.25116	32.1049	7.18291e-06	0.000640797	3	4	Down-regulated
Sus_scrofa___UBXN6	-1.26387	4.23674	32.2967	7.22039e-06	0.000640797	3	4	Down-regulated
Sus_scrofa___AKAP8	-1.43526	5.56179	32.2012	7.37199e-06	0.000649643	3	4	Down-regulated
Sus_scrofa___ENSSSCG00000015747	-3.76436	9.94681	31.692	8.2521e-06	0.000702467	3	4	Down-regulated
Sus_scrofa___OSBPL3	-1.18867	8.16237	31.5941	8.43402e-06	0.000713102	3	4	Down-regulated
Sus_scrofa___PCMTD2	-1.41208	5.95665	31.4993	8.61458e-06	0.00072348	3	4	Down-regulated
Sus_scrofa___CEP85	-1.46753	7.03076	31.2306	9.14895e-06	0.000755679	3	4	Down-regulated
Sus_scrofa___CFAP97D1	-2.56024	2.54614	31.1696	9.34094e-06	0.000767064	3	4	Down-regulated
Sus_scrofa___LAMB2	-2.38628	4.37279	31.1023	9.42137e-06	0.000770117	3	4	Down-regulated
Sus_scrofa___ESRRG	-1.36187	9.42776	31.0881	9.44683e-06	0.000770117	3	4	Down-regulated
Sus_scrofa___NASP	-1.26245	5.10053	30.9203	9.81213e-06	0.000788866	3	4	Down-regulated
Sus_scrofa___ETV1	-4.54757	3.03728	30.6893	1.03573e-05	0.000822896	3	4	Down-regulated
Sus_scrofa___PHKA2	-1.61528	4.42795	30.6237	1.04961e-05	0.000826059	3	4	Down-regulated
Sus_scrofa___COX6B2	-4.36671	-1.21334	27.8529	1.09869e-05	0.000853945	3	4	Down-regulated
Sus_scrofa___ATG16L2	-1.95546	2.80415	30.2249	1.15356e-05	0.000891057	3	4	Down-regulated
Sus_scrofa___ENSSSCG00000041499	-4.71795	4.54821	30.1961	1.1612e-05	0.000891454	3	4	Down-regulated
Sus_scrofa___C12orf56	-2.20517	2.08946	30.1634	1.17524e-05	0.000898431	3	4	Down-regulated
Sus_scrofa___MTHFD1	-1.33134	5.11708	29.9235	1.23165e-05	0.000926657	3	4	Down-regulated
Sus_scrofa___ROBO2	-3.70428	6.35477	29.5846	1.33198e-05	0.000984318	3	4	Down-regulated
Sus_scrofa___GNAO1	-2.87368	5.39963	29.5808	1.33329e-05	0.000984318	3	4	Down-regulated
Sus_scrofa___FAM216B	-6.44702	-0.558698	27.5407	1.33938e-05	0.000985902	3	4	Down-regulated
Sus_scrofa___RASGRP2	-3.5471	2.04001	29.4591	1.36169e-05	0.00099648	3	4	Down-regulated
Sus_scrofa___SLC38A3	-2.67454	2.76897	29.3572	1.41179e-05	0.00102335	3	4	Down-regulated
Sus_scrofa___ERICH4	-3.31934	1.475	29.1842	1.4137e-05	0.00102335	3	4	Down-regulated
Sus_scrofa___STXBP6	-2.23563	8.19954	29.2694	1.43307e-05	0.00102767	3	4	Down-regulated
Sus_scrofa___MAP2K6	-4.03912	2.6171	29.2141	1.45367e-05	0.00103945	3	4	Down-regulated
Sus_scrofa___ENSSSCG00000032969	-1.10733	4.50059	29.1661	1.46836e-05	0.00104697	3	4	Down-regulated
Sus_scrofa___RETSAT	-3.30714	4.39347	28.9208	1.55608e-05	0.00108782	3	4	Down-regulated
Sus_scrofa___CES5A	-2.55609	1.48447	28.8909	1.57075e-05	0.00109502	3	4	Down-regulated
Sus_scrofa___ENSSSCG00000046510	-3.60999	-0.157907	27.3428	1.66064e-05	0.00113554	3	4	Down-regulated
Sus_scrofa___ENSSSCG00000037344	-3.0809	0.211967	27.9753	1.76702e-05	0.00119417	3	4	Down-regulated
Sus_scrofa___ENSSSCG00000037140	-2.39749	4.99383	28.332	1.78728e-05	0.00119967	3	4	Down-regulated
Sus_scrofa___RIPOR3	-2.27559	2.49157	28.3245	1.79944e-05	0.0012026	3	4	Down-regulated
Sus_scrofa___MCFD2	-1.88089	4.98878	28.2865	1.80657e-05	0.0012026	3	4	Down-regulated
Sus_scrofa___B3GNT8	-3.53464	2.25546	28.176	1.86513e-05	0.00122317	3	4	Down-regulated
Sus_scrofa___PPEF2	-2.86086	0.57372	27.7291	1.87188e-05	0.00122317	3	4	Down-regulated
Sus_scrofa___SLC28A3	-1.58571	1.99731	28.0576	1.9219e-05	0.00124765	3	4	Down-regulated
Sus_scrofa___TRPM7	-0.917754	9.66442	28.0212	1.9243e-05	0.00124765	3	4	Down-regulated
Sus_scrofa___CDH1	-2.92653	1.71535	28.0079	1.93377e-05	0.00125055	3	4	Down-regulated
Sus_scrofa___ENSSSCG00000041209	-3.4353	-0.806084	25.0129	1.93973e-05	0.00125117	3	4	Down-regulated
Papio_anubis_ETV1	-6.61086	-1.99748	25.3399	1.95304e-05	0.00125652	3	4	Down-regulated
Sus_scrofa___ASPDH	-2.68263	11.0539	27.9071	1.97758e-05	0.00126905	3	4	Down-regulated
Sus_scrofa___NELFCD	-1.1823	4.38053	27.8388	2.01065e-05	0.00128369	3	4	Down-regulated
Sus_scrofa___PTPRU	-1.56777	4.8095	27.8158	2.02159e-05	0.00128739	3	4	Down-regulated
Sus_scrofa___ENSSSCG00000031964	-8.40262	-0.737496	24.3286	2.05788e-05	0.00130057	3	4	Down-regulated
Sus_scrofa___CPT1B	-1.86267	7.21613	27.7179	2.06945e-05	0.00130276	3	4	Down-regulated
Sus_scrofa___FRMD7	-1.97082	1.24083	27.6807	2.09801e-05	0.00131267	3	4	Down-regulated
Sus_scrofa___MINDY1	-1.93349	5.25371	27.4954	2.18368e-05	0.00135275	3	4	Down-regulated
Sus_scrofa___BPHL	-1.52299	3.85673	27.4305	2.21916e-05	0.00136305	3	4	Down-regulated
Sus_scrofa___PRKAG1	-1.3962	4.1853	27.4243	2.2221e-05	0.00136305	3	4	Down-regulated
Sus_scrofa___ABCC9	-2.42573	1.96844	27.4479	2.22821e-05	0.00136345	3	4	Down-regulated
Sus_scrofa___STRIP2	-1.53272	6.59401	27.3616	2.25539e-05	0.00137338	3	4	Down-regulated
Sus_scrofa___MMP11	-3.34822	6.58258	27.2161	2.33654e-05	0.00140914	3	4	Down-regulated
Sus_scrofa___DLX1	-3.94375	-1.12453	24.9481	2.33666e-05	0.00140914	3	4	Down-regulated
Sus_scrofa___ENSSSCG00000035525	-1.91683	2.76017	27.2048	2.35113e-05	0.00141447	3	4	Down-regulated
Sus_scrofa___BEST3	-1.92612	2.6783	27.0966	2.41348e-05	0.00144503	3	4	Down-regulated
Sus_scrofa___TRIM65	-2.27391	2.70222	27.0122	2.46513e-05	0.00146544	3	4	Down-regulated
Sus_scrofa___ENSSSCG00000012895	-2.57431	4.41786	26.8532	2.55364e-05	0.00149926	3	4	Down-regulated
Sus_scrofa___MSRB2	-1.17955	5.33913	26.8449	2.55798e-05	0.00149926	3	4	Down-regulated
Sus_scrofa___SLC19A1	-2.24366	2.60207	26.784	2.6067e-05	0.00152425	3	4	Down-regulated
Sus_scrofa___TPST2	-1.66809	4.99799	26.7001	2.65066e-05	0.00153931	3	4	Down-regulated
Sus_scrofa___RAPGEF3	-2.67957	0.131466	26.0566	2.84504e-05	0.00163309	3	4	Down-regulated
Sus_scrofa___ENSSSCG00000004016	-2.4591	-0.796891	24.426	2.88194e-05	0.00164432	3	4	Down-regulated
Sus_scrofa___CORIN	-2.16969	9.76986	26.3569	2.88431e-05	0.00164432	3	4	Down-regulated
Sus_scrofa___MRPL46	-1.3217	3.94732	26.2026	2.99805e-05	0.00169125	3	4	Down-regulated
Sus_scrofa___PTPN4	-1.3617	9.35746	26.1976	3.00042e-05	0.00169125	3	4	Down-regulated
Sus_scrofa___ASB14	-2.73223	3.83024	26.0729	3.10019e-05	0.00172803	3	4	Down-regulated
Sus_scrofa___RYR2	-1.25756	13.8959	26.0193	3.13647e-05	0.00174049	3	4	Down-regulated
Sus_scrofa___IVD	-1.46449	5.23136	25.8589	3.26482e-05	0.00179659	3	4	Down-regulated
Papio_anubis_ENSPANG00000044173	-3.52066	-1.19315	24.0957	3.32078e-05	0.0018144	3	4	Down-regulated
Sus_scrofa___HVCN1	-1.91225	4.06855	25.784	3.32764e-05	0.0018144	3	4	Down-regulated
Sus_scrofa___ZNF235	-2.00997	3.29807	25.7695	3.34228e-05	0.00181842	3	4	Down-regulated
Sus_scrofa___ADCY6	-1.88062	8.90397	25.7517	3.35336e-05	0.00182049	3	4	Down-regulated
Sus_scrofa___RGS11	-2.63219	1.93312	25.7604	3.37036e-05	0.00182572	3	4	Down-regulated
Sus_scrofa___HDAC6	-1.25999	5.21469	25.7097	3.38901e-05	0.00182795	3	4	Down-regulated
Sus_scrofa___SLC51B	-4.55205	-0.66707	24.5878	3.54676e-05	0.00188861	3	4	Down-regulated
Sus_scrofa___TINAG	-5.53591	4.1361	25.4868	3.56336e-05	0.00189057	3	4	Down-regulated
Sus_scrofa___PEBP4	-2.08782	2.98102	25.4159	3.6568e-05	0.00192255	3	4	Down-regulated
Sus_scrofa___ENSSSCG00000042384	-3.7079	-0.657787	24.5382	3.70617e-05	0.00193642	3	4	Down-regulated
Sus_scrofa___ENSSSCG00000012879	-1.34265	4.29415	25.2875	3.7699e-05	0.00195745	3	4	Down-regulated
Sus_scrofa___CLRN1	-3.01961	0.581731	24.5494	4.03232e-05	0.00203461	3	4	Down-regulated
Sus_scrofa___PPM1L	-2.21038	7.1271	25.0092	4.04498e-05	0.0020369	3	4	Down-regulated
Sus_scrofa___HJV	-4.98283	1.1087	24.2053	4.12012e-05	0.00206236	3	4	Down-regulated
Sus_scrofa___KCNJ3	-1.31365	9.82398	24.9368	4.12028e-05	0.00206236	3	4	Down-regulated
Sus_scrofa___NAAA	-2.8573	3.96397	24.7738	4.30211e-05	0.00213629	3	4	Down-regulated
Sus_scrofa___CA14	-2.87832	4.57403	24.7415	4.33337e-05	0.00214444	3	4	Down-regulated
Sus_scrofa___SMPD4	-1.06617	4.63822	24.7314	4.34294e-05	0.00214444	3	4	Down-regulated
Sus_scrofa___PRKAG3	-2.1526	4.22331	24.6238	4.46589e-05	0.00220015	3	4	Down-regulated
Sus_scrofa___TXNDC16	-1.40254	7.24327	24.5932	4.49904e-05	0.00221213	3	4	Down-regulated
Sus_scrofa___ENSSSCG00000044774	-4.12094	3.58434	24.5955	4.51068e-05	0.0022135	3	4	Down-regulated
Sus_scrofa___CCK	-3.42015	5.46024	24.5162	4.59021e-05	0.00224373	3	4	Down-regulated
Sus_scrofa___PHACTR3	-3.48406	1.79585	24.4491	4.69638e-05	0.00228226	3	4	Down-regulated
Sus_scrofa___ANXA9	-1.83459	3.52116	24.3464	4.79826e-05	0.00232043	3	4	Down-regulated
Sus_scrofa___EPB41L5	-1.36783	7.39695	24.3344	4.8092e-05	0.00232043	3	4	Down-regulated
Sus_scrofa___COMMD3	-1.51894	5.11176	24.3325	4.81202e-05	0.00232043	3	4	Down-regulated
Sus_scrofa___KLHL32	-1.79468	6.88636	24.2989	4.85358e-05	0.00233597	3	4	Down-regulated
Sus_scrofa___GASK1B	-2.8746	5.71159	24.1263	5.07584e-05	0.00241968	3	4	Down-regulated
Sus_scrofa___HYPK	-1.67666	3.90452	24.0123	5.23092e-05	0.00247475	3	4	Down-regulated
Sus_scrofa___ATP10D	-2.24078	5.61906	23.849	5.45578e-05	0.00253324	3	4	Down-regulated
Sus_scrofa___SACS	-1.33054	4.49338	23.7943	5.5349e-05	0.00255655	3	4	Down-regulated
Sus_scrofa___TPRA1	-1.43541	3.10755	23.7802	5.56098e-05	0.00256307	3	4	Down-regulated
Sus_scrofa___ENSSSCG00000018046	-2.07628	3.60224	23.757	5.59416e-05	0.00257362	3	4	Down-regulated
Sus_scrofa___PTOV1	-1.59844	3.87219	23.7204	5.64431e-05	0.00259193	3	4	Down-regulated
Sus_scrofa___ANKRD39	-1.3721	8.10533	23.6914	5.68494e-05	0.0026058	3	4	Down-regulated
Sus_scrofa___ZNF2	-1.06788	4.68676	23.6481	5.75057e-05	0.00262149	3	4	Down-regulated
Sus_scrofa___ENSSSCG00000043694	-1.76001	4.11084	23.6271	5.78387e-05	0.00263187	3	4	Down-regulated
Sus_scrofa___NEXMIF	-2.73564	-0.33179	22.9652	5.80087e-05	0.00263262	3	4	Down-regulated
Sus_scrofa___PTN	-3.04622	2.35585	23.5552	5.81423e-05	0.00263262	3	4	Down-regulated
Sus_scrofa___GABRA4	-1.67378	6.75029	23.6038	5.81708e-05	0.00263262	3	4	Down-regulated
Sus_scrofa___CAST	-1.29348	9.30374	23.5804	5.85302e-05	0.00263929	3	4	Down-regulated
Sus_scrofa___DNAJC5G	-2.60568	0.00563026	23.1648	5.86346e-05	0.00263929	3	4	Down-regulated
Sus_scrofa___HNMT	-3.59927	2.19974	23.6036	5.92559e-05	0.0026577	3	4	Down-regulated
Papio_anubis_TMEFF1	-3.52478	-1.12555	21.752	5.9502e-05	0.00266397	3	4	Down-regulated
Sus_scrofa___ENSSSCG00000010310	-1.38721	3.32004	23.4712	6.03029e-05	0.00268345	3	4	Down-regulated
Sus_scrofa___ENSSSCG00000047384	-3.03715	1.80048	23.4051	6.04105e-05	0.00268345	3	4	Down-regulated
Sus_scrofa___ENSSSCG00000051693	-6.19957	-1.75589	21.9984	6.06574e-05	0.00268685	3	4	Down-regulated
Sus_scrofa___CEP126	-1.29146	7.6926	23.3843	6.16301e-05	0.00272031	3	4	Down-regulated
Sus_scrofa___RXRG	-2.76625	5.74523	23.3113	6.28341e-05	0.00276857	3	4	Down-regulated
Sus_scrofa___HAUS8	-1.49228	3.59549	23.2621	6.36925e-05	0.00279002	3	4	Down-regulated
Sus_scrofa___ABCG5	-2.83417	1.16745	23.2375	6.37668e-05	0.00279002	3	4	Down-regulated
Sus_scrofa___ENSSSCG00000041764	-1.20006	8.14613	23.2435	6.39671e-05	0.0027939	3	4	Down-regulated
Sus_scrofa___ENSSSCG00000050756	-6.32268	-1.91945	20.3678	6.50742e-05	0.00282255	3	4	Down-regulated
Sus_scrofa___SLC26A3	-1.97691	2.48721	23.1182	6.63894e-05	0.00285486	3	4	Down-regulated
Sus_scrofa___ASB15	-2.5301	7.99582	23.0677	6.70199e-05	0.00287482	3	4	Down-regulated
Sus_scrofa___ENSSSCG00000046774	-3.88358	-1.15106	21.9152	6.70834e-05	0.00287482	3	4	Down-regulated
Sus_scrofa___ASB12	-3.56868	0.124583	22.1879	6.79374e-05	0.00289246	3	4	Down-regulated
Sus_scrofa___TTC7A	-1.87059	4.59794	23.0163	6.79572e-05	0.00289246	3	4	Down-regulated
Sus_scrofa___MYLK3	-1.29943	8.61505	22.9752	6.86888e-05	0.00291369	3	4	Down-regulated
Sus_scrofa___SLF1	-1.5472	5.20441	22.9487	6.91811e-05	0.0029296	3	4	Down-regulated
Sus_scrofa___ENSSSCG00000000028	-2.83924	-0.450952	22.0668	6.93482e-05	0.00293172	3	4	Down-regulated
Sus_scrofa___GRAMD1C	-1.81991	6.38307	22.8828	7.04039e-05	0.00296605	3	4	Down-regulated
Sus_scrofa___CACNA1D	-1.32588	5.0576	22.8491	7.10444e-05	0.00296605	3	4	Down-regulated
Sus_scrofa___ENSSSCG00000046137	-2.41386	-0.433979	22.2622	7.10869e-05	0.00296605	3	4	Down-regulated
Sus_scrofa___ENSSSCG00000037083	-3.47841	-0.958097	21.2656	7.11084e-05	0.00296605	3	4	Down-regulated
Sus_scrofa___ASB9	-4.22844	0.591541	22.2342	7.1965e-05	0.00299181	3	4	Down-regulated
Papio_anubis_EMC2	-2.48052	1.69472	22.7922	7.22866e-05	0.00299523	3	4	Down-regulated
Sus_scrofa___NICN1	-1.72705	1.44116	22.6912	7.46906e-05	0.00306943	3	4	Down-regulated
Sus_scrofa___MICU1	-0.891843	7.41421	22.6146	7.56433e-05	0.00309511	3	4	Down-regulated
Sus_scrofa___NTHL1	-1.86339	1.99587	22.5905	7.66193e-05	0.00311797	3	4	Down-regulated
Sus_scrofa___ENSSSCG00000012672	-5.06767	-2.38104	19.7398	7.71073e-05	0.00312922	3	4	Down-regulated
Sus_scrofa___XRCC3	-1.6524	1.79834	22.5643	7.72227e-05	0.00312922	3	4	Down-regulated
Sus_scrofa___ITPRID1	-3.13757	3.37525	22.5448	7.72708e-05	0.00312922	3	4	Down-regulated
Papio_anubis_SOX6	-2.49868	1.50864	22.5385	7.74777e-05	0.00313179	3	4	Down-regulated
Sus_scrofa___EPHX2	-2.17626	5.47164	22.4466	7.91437e-05	0.00317934	3	4	Down-regulated
Sus_scrofa___RNPS1	-1.0312	5.80032	22.4169	7.97759e-05	0.00318701	3	4	Down-regulated
Sus_scrofa___NSMF	-1.73197	3.83365	22.3899	8.03949e-05	0.00320389	3	4	Down-regulated
Sus_scrofa___ENSSSCG00000038202	-1.18604	5.75056	22.2161	8.42273e-05	0.00329969	3	4	Down-regulated
Sus_scrofa___DPH7	-1.39308	3.62515	22.1639	8.54656e-05	0.00334211	3	4	Down-regulated
Sus_scrofa___GBA2	-1.1515	5.69013	22.1468	8.58267e-05	0.00334263	3	4	Down-regulated
Sus_scrofa___ARG1	-3.52305	1.77312	22.1122	8.58796e-05	0.00334263	3	4	Down-regulated
Sus_scrofa___MMP16	-1.32881	8.05412	22.0439	8.82567e-05	0.00341391	3	4	Down-regulated
Sus_scrofa___PDE4D	-1.30231	13.4271	21.9279	9.10896e-05	0.00350184	3	4	Down-regulated
Sus_scrofa___TTC16	-3.19253	0.570548	21.6992	9.21946e-05	0.00353889	3	4	Down-regulated
Sus_scrofa___ENSSSCG00000044598	-3.12213	-0.891067	21.0082	9.41981e-05	0.00358826	3	4	Down-regulated
Sus_scrofa___MAOB	-2.57161	5.12203	21.7799	9.48626e-05	0.00360262	3	4	Down-regulated
Sus_scrofa___CLK3	-1.30836	3.44975	21.7241	9.63707e-05	0.00364882	3	4	Down-regulated
Sus_scrofa___ENSSSCG00000037928	-3.95689	-1.63966	18.6255	9.89227e-05	0.00373415	3	4	Down-regulated
Sus_scrofa___LNP1	-3.26638	3.41166	21.6039	9.97772e-05	0.00375849	3	4	Down-regulated
Sus_scrofa___GDPD2	-3.7203	3.09741	21.6057	9.99399e-05	0.00375849	3	4	Down-regulated
Sus_scrofa___LDHD	-2.55519	1.76213	21.5292	0.000101566	0.00380377	3	4	Down-regulated
Sus_scrofa___DPP4	-1.49385	8.62164	21.4918	0.000102661	0.00382337	3	4	Down-regulated
Sus_scrofa___CTBS	-2.70001	1.30338	21.3434	0.000105434	0.00389763	3	4	Down-regulated
Sus_scrofa___FAM186B	-2.22415	1.40147	21.312	0.000108603	0.00398536	3	4	Down-regulated
Sus_scrofa___ENSSSCG00000051631	-5.13481	-1.89706	20.1394	0.00010981	0.00402028	3	4	Down-regulated
Sus_scrofa___FHL2	-1.88759	11.4094	21.1781	0.000111967	0.00407889	3	4	Down-regulated
Sus_scrofa___ENSSSCG00000049530	-3.28931	3.4285	21.1774	0.000112325	0.00408597	3	4	Down-regulated
Sus_scrofa___NDUFB3	-0.988817	5.91434	21.0881	0.000114803	0.00417008	3	4	Down-regulated
Sus_scrofa___PDHA1	-1.11005	5.99654	21.0463	0.000116147	0.00421167	3	4	Down-regulated
Sus_scrofa___ZNF804B	-2.35512	9.21629	21.0158	0.000117137	0.00423641	3	4	Down-regulated
Sus_scrofa___TSR2	-1.35033	4.47773	20.9862	0.000118125	0.00426597	3	4	Down-regulated
Sus_scrofa___HSD17B10	-2.1436	0.981541	20.8138	0.000120903	0.00432263	3	4	Down-regulated
Papio_anubis_GRAMD1C	-3.81225	-2.05747	18.3642	0.000121459	0.00433013	3	4	Down-regulated
Sus_scrofa___DECR1	-0.983713	6.49059	20.8502	0.00012268	0.00435511	3	4	Down-regulated
Sus_scrofa___MANBA	-2.34503	4.67279	20.8428	0.000122956	0.00435868	3	4	Down-regulated
Sus_scrofa___CENPE	-2.66667	1.79587	20.8241	0.000125011	0.00440079	3	4	Down-regulated
Sus_scrofa___PIGQ	-1.30507	5.30909	20.7103	0.000127592	0.00447235	3	4	Down-regulated
Sus_scrofa___TYK2	-0.907047	5.29037	20.6733	0.000128926	0.0045069	3	4	Down-regulated
Sus_scrofa___ENSSSCG00000014368	-2.31999	1.35414	20.5973	0.00013032	0.00453877	3	4	Down-regulated
Sus_scrofa___FGF1	-1.49377	7.93614	20.6266	0.000130625	0.00454047	3	4	Down-regulated
Sus_scrofa___WNK2	-1.41375	8.24312	20.6043	0.000131446	0.00456268	3	4	Down-regulated
Sus_scrofa___TRRAP	-0.759422	6.96203	20.5842	0.000132193	0.00457493	3	4	Down-regulated
Sus_scrofa___DNPH1	-2.00059	2.45398	20.5947	0.000132343	0.00457493	3	4	Down-regulated
Sus_scrofa___GCN1	-0.870846	5.88594	20.5647	0.000132922	0.00458847	3	4	Down-regulated
Sus_scrofa___COQ8A	-1.33458	7.79155	20.537	0.000133963	0.00461167	3	4	Down-regulated
Sus_scrofa___U2AF1L4	-1.61949	2.39852	20.5156	0.000135236	0.00464323	3	4	Down-regulated
Sus_scrofa___TLCD3B	-2.42937	2.37048	20.5044	0.000135484	0.00464489	3	4	Down-regulated
Sus_scrofa___ENSSSCG00000049081	-2.95027	0.953065	20.1357	0.000146697	0.00492803	3	4	Down-regulated
Sus_scrofa___ENSSSCG00000043759	-2.79679	3.04957	20.1967	0.000147951	0.00495023	3	4	Down-regulated
Sus_scrofa___RIBC1	-1.88358	2.7956	20.152	0.000149855	0.00500161	3	4	Down-regulated
Sus_scrofa___ACSM3	-2.02211	2.55082	20.1514	0.000149886	0.00500161	3	4	Down-regulated
Papio_anubis_ENSPANG00000029693	-1.75695	1.66167	20.0087	0.000156498	0.00516381	3	4	Down-regulated
Sus_scrofa___ANO8	-1.65007	3.43223	19.9833	0.000156865	0.00516381	3	4	Down-regulated
Sus_scrofa___SMIM5	-1.94087	4.52713	19.9781	0.000157017	0.00516381	3	4	Down-regulated
Sus_scrofa___ARMCX6	-1.6378	2.13112	19.9829	0.000157437	0.00516741	3	4	Down-regulated
Sus_scrofa___KY	-2.71099	3.43205	19.9701	0.000157539	0.00516741	3	4	Down-regulated
Sus_scrofa___ASNS	-1.63901	6.34273	19.857	0.000162531	0.00526901	3	4	Down-regulated
Sus_scrofa___ENSSSCG00000046159	-4.18452	-0.171209	19.0967	0.000163722	0.00528681	3	4	Down-regulated
Sus_scrofa___ENSSSCG00000031810	-1.0715	4.44213	19.827	0.000163956	0.00528681	3	4	Down-regulated
Sus_scrofa___WEE2	-2.24958	2.25461	19.8366	0.000164137	0.00528681	3	4	Down-regulated
Sus_scrofa___ENSSSCG00000034739	-3.15268	1.84101	19.7441	0.00016906	0.00542443	3	4	Down-regulated
Sus_scrofa___RAB20	-1.63199	5.81332	19.7026	0.000169902	0.00543057	3	4	Down-regulated
Sus_scrofa___SPATA45	-2.24053	-0.0879509	19.4569	0.000171303	0.00546141	3	4	Down-regulated
Sus_scrofa___B3GALT2	-2.10309	4.93279	19.662	0.000171916	0.00547307	3	4	Down-regulated
Sus_scrofa___FCGR1A	-2.55603	2.99113	19.6692	0.000172106	0.00547307	3	4	Down-regulated
Sus_scrofa___GHRH	-2.26428	0.213617	19.4704	0.000173069	0.00549669	3	4	Down-regulated
Sus_scrofa___ENSSSCG00000047774	-2.7078	-0.478063	18.7439	0.000176215	0.00558951	3	4	Down-regulated
Sus_scrofa___DCLRE1A	-1.09047	6.18275	19.5643	0.00017681	0.0056013	3	4	Down-regulated
Sus_scrofa___P4HA3	-3.8286	-0.752912	18.6639	0.000177999	0.00563184	3	4	Down-regulated
Sus_scrofa___ASB5	-1.97401	4.18489	19.5187	0.000179196	0.00564914	3	4	Down-regulated
Sus_scrofa___ENPP1	-1.66982	7.58959	19.5163	0.000179276	0.00564914	3	4	Down-regulated
Sus_scrofa___ENSSSCG00000002877	-1.16711	5.91718	19.4789	0.00018123	0.0056909	3	4	Down-regulated
Sus_scrofa___SLC1A6	-3.23078	-1.4181	17.6954	0.00018616	0.0058165	3	4	Down-regulated
Sus_scrofa___NT5C1A	-1.52643	4.15834	19.3629	0.000187467	0.00584277	3	4	Down-regulated
Sus_scrofa___ENSSSCG00000014041	-1.57639	1.29446	19.3511	0.000189802	0.00587689	3	4	Down-regulated
Sus_scrofa___TRPC4	-2.12332	3.8262	19.2534	0.000193595	0.00594178	3	4	Down-regulated
Sus_scrofa___RAMP1	-1.10595	7.97445	19.246	0.000193899	0.00594178	3	4	Down-regulated
Sus_scrofa___ENSSSCG00000050174	-4.03529	4.73568	19.2288	0.000195098	0.0059618	3	4	Down-regulated
Sus_scrofa___UBXN11	-2.10794	3.5756	19.1515	0.000199455	0.00608009	3	4	Down-regulated
Sus_scrofa___SCN4A	-1.82929	0.495268	19.1536	0.000199921	0.00608225	3	4	Down-regulated
Sus_scrofa___LRFN2	-2.37671	6.65187	19.1079	0.00020187	0.00611647	3	4	Down-regulated
Sus_scrofa___RBMS2	-1.21849	5.65945	19.0661	0.000204352	0.00618417	3	4	Down-regulated
Sus_scrofa___DVL2	-1.26758	3.22565	19.0301	0.000206645	0.00621599	3	4	Down-regulated
Sus_scrofa___SERINC4	-2.66597	0.649269	18.9077	0.000207509	0.0062345	3	4	Down-regulated
Sus_scrofa___ENSSSCG00000043379	-6.79492	-1.95658	18.0378	0.000209592	0.00627356	3	4	Down-regulated
Sus_scrofa___ENSSSCG00000051665	-2.27315	0.212361	18.8595	0.000209812	0.00627356	3	4	Down-regulated
Sus_scrofa___AMIGO1	-2.03135	1.89847	18.9606	0.000211868	0.00632746	3	4	Down-regulated
Sus_scrofa___PGM2L1	-1.12434	4.81552	18.8822	0.000215675	0.00639539	3	4	Down-regulated
Sus_scrofa___GZMK	-3.0465	-0.704514	18.1702	0.000217275	0.00641999	3	4	Down-regulated
Sus_scrofa___ENSSSCG00000023127	-2.26712	-0.768615	18.097	0.00022015	0.00648963	3	4	Down-regulated
Sus_scrofa___SPATS2	-1.41811	5.78345	18.7913	0.000221509	0.00649437	3	4	Down-regulated
Sus_scrofa___PLEKHH3	-2.44154	3.95082	18.7913	0.000221608	0.00649437	3	4	Down-regulated
Sus_scrofa___DALRD3	-1.19901	4.60511	18.7454	0.000224544	0.00655219	3	4	Down-regulated
Sus_scrofa___PEX5L	-2.28543	5.6104	18.7439	0.000224629	0.00655219	3	4	Down-regulated
Sus_scrofa___ENSSSCG00000039331	-2.03108	4.91496	18.7341	0.000225289	0.0065603	3	4	Down-regulated
Sus_scrofa___TPPP	-2.51719	3.46023	18.7276	0.000225945	0.0065603	3	4	Down-regulated
Sus_scrofa___ENSSSCG00000039089	-1.74984	3.53578	18.7117	0.000226894	0.0065603	3	4	Down-regulated
Sus_scrofa___ENSSSCG00000044821	-3.1272	-0.996535	17.9687	0.000227064	0.0065603	3	4	Down-regulated
Sus_scrofa___STOML2	-1.57231	2.50096	18.7125	0.000227321	0.0065603	3	4	Down-regulated
Sus_scrofa___TBX10	-2.99301	1.12274	18.6228	0.000227528	0.0065603	3	4	Down-regulated
Sus_scrofa___TMEM120B	-1.315	7.02054	18.685	0.000228554	0.00658229	3	4	Down-regulated
Sus_scrofa___GFRA1	-1.93567	2.0133	18.6545	0.000231361	0.00663515	3	4	Down-regulated
Sus_scrofa___FCGRT	-1.46139	3.54474	18.6441	0.000231449	0.00663515	3	4	Down-regulated
Sus_scrofa___DAZAP1	-0.907249	6.85325	18.6027	0.000234179	0.00669804	3	4	Down-regulated
Sus_scrofa___ENSSSCG00000023325	-1.80268	2.64664	18.5942	0.00023533	0.00672328	3	4	Down-regulated
Sus_scrofa___ENSSSCG00000041597	-2.88572	-0.207668	18.1262	0.00023601	0.00673504	3	4	Down-regulated
Sus_scrofa___PNISR	-0.754773	8.74235	18.5282	0.000239404	0.00680861	3	4	Down-regulated
Sus_scrofa___UQCRQ	-1.64311	6.49799	18.4708	0.000243516	0.006902	3	4	Down-regulated
Sus_scrofa___IGDCC4	-1.59275	2.31594	18.4631	0.000244785	0.00693012	3	4	Down-regulated
Sus_scrofa___ENSSSCG00000050816	-2.75354	-1.69335	17.0241	0.000249338	0.00702807	3	4	Down-regulated
Sus_scrofa___MGLL	-1.27669	6.79529	18.3648	0.000251308	0.00706683	3	4	Down-regulated
Sus_scrofa___ENSSSCG00000022295	-1.01066	6.20484	18.3307	0.000253874	0.00712299	3	4	Down-regulated
Sus_scrofa___ADAMTS6	-1.96335	8.49266	18.3064	0.00025572	0.00713478	3	4	Down-regulated
Sus_scrofa___ENSSSCG00000034367	-2.65841	2.17211	18.3042	0.000256342	0.00714077	3	4	Down-regulated
Sus_scrofa___SLC47A1	-1.20336	5.86137	18.2961	0.000256505	0.00714077	3	4	Down-regulated
Papio_anubis_CCT5	-6.30396	-2.3342	25.6166	0.000257046	0.00714787	3	4	Down-regulated
Sus_scrofa___MPPED2	-1.13531	6.89313	18.2807	0.000257689	0.00715782	3	4	Down-regulated
Sus_scrofa___TLN2	-1.29991	9.35094	18.1659	0.000266676	0.00735034	3	4	Down-regulated
Sus_scrofa___ENSSSCG00000040091	-6.56139	-0.898202	18.4937	0.000268527	0.0073932	3	4	Down-regulated
Sus_scrofa___ENSSSCG00000044871	-3.24061	-2.2447	16.2835	0.000269766	0.00741917	3	4	Down-regulated
Sus_scrofa___BMP5	-1.77762	6.2974	18.114	0.000270855	0.00744092	3	4	Down-regulated
Sus_scrofa___ATP5ME	-1.16355	5.91079	18.1025	0.000271792	0.00745847	3	4	Down-regulated
Sus_scrofa___ENSSSCG00000039326	-3.40894	0.568945	17.7207	0.000273379	0.00748561	3	4	Down-regulated
Sus_scrofa___ENSSSCG00000032157	-1.93096	-0.393624	17.7202	0.000274677	0.00751293	3	4	Down-regulated
Sus_scrofa___FBF1	-1.75017	4.54972	18.0521	0.000275961	0.00753159	3	4	Down-regulated
Sus_scrofa___IDH3G	-1.16607	3.86254	18	0.00028035	0.00763472	3	4	Down-regulated
Sus_scrofa___SOX13	-2.31132	1.6067	18.0135	0.00028302	0.00768689	3	4	Down-regulated
Sus_scrofa___NREP	-3.07943	6.60327	17.9435	0.000285083	0.00771234	3	4	Down-regulated
Sus_scrofa___ENSSSCG00000013530	-1.93027	3.58847	17.9426	0.000285357	0.00771234	3	4	Down-regulated
Sus_scrofa___TMEM53	-1.51988	3.34538	17.9335	0.000286156	0.00771502	3	4	Down-regulated
Sus_scrofa___MINDY4B	-2.77725	0.499777	17.4358	0.000286361	0.00771502	3	4	Down-regulated
Sus_scrofa___ENSSSCG00000031075	-3.22459	3.04549	17.9337	0.000286381	0.00771502	3	4	Down-regulated
Sus_scrofa___TMEM52B	-1.80357	4.51874	17.88	0.000290638	0.00780452	3	4	Down-regulated
Sus_scrofa___PLEKHA6	-1.95203	6.40226	17.8705	0.000291417	0.00781704	3	4	Down-regulated
Sus_scrofa___STAP2	-2.12109	-0.599083	17.4494	0.000292692	0.00783445	3	4	Down-regulated
Sus_scrofa___ENSSSCG00000033787	-2.20839	0.54987	17.6889	0.00029482	0.00788296	3	4	Down-regulated
Sus_scrofa___SMIM17	-2.19952	2.3355	17.8314	0.000295975	0.0079054	3	4	Down-regulated
Sus_scrofa___TACR3	-3.06935	0.430983	17.5495	0.000297138	0.00792448	3	4	Down-regulated
Sus_scrofa___ENSSSCG00000040106	-1.72599	0.744528	17.8172	0.000298409	0.00794164	3	4	Down-regulated
Sus_scrofa___PXYLP1	-1.61538	6.49409	17.7778	0.000299688	0.00795947	3	4	Down-regulated
Sus_scrofa___NUDT6	-1.09421	6.02919	17.7593	0.000301364	0.0079812	3	4	Down-regulated
Sus_scrofa___ENSSSCG00000022820	-1.25564	3.47449	17.7572	0.000301692	0.00798145	3	4	Down-regulated
Sus_scrofa___SBK2	-2.25584	1.14749	17.7374	0.000304286	0.00801616	3	4	Down-regulated
Sus_scrofa___MYCBPAP	-1.93169	1.18292	17.7295	0.000306968	0.00806137	3	4	Down-regulated
Sus_scrofa___ZNF483	-1.94639	3.1737	17.6922	0.000308003	0.00808007	3	4	Down-regulated
Sus_scrofa___CDH8	-2.08191	6.7745	17.6791	0.000308768	0.00808532	3	4	Down-regulated
Sus_scrofa___ENSSSCG00000044745	-3.12055	1.75155	17.6293	0.000311138	0.00813638	3	4	Down-regulated
Sus_scrofa___MAGIX	-1.55048	3.33783	17.652	0.000311488	0.00813638	3	4	Down-regulated
Sus_scrofa___GLS	-1.17414	8.80605	17.6277	0.000313611	0.00817578	3	4	Down-regulated
Sus_scrofa___CSTA	-1.86274	1.79628	17.6216	0.000315185	0.00820305	3	4	Down-regulated
Sus_scrofa___PPFIA3	-2.02864	4.57216	17.6104	0.000315313	0.00820305	3	4	Down-regulated
Sus_scrofa___CTNNB1	-0.850604	6.74109	17.6053	0.000315759	0.00820612	3	4	Down-regulated
Sus_scrofa___MCTS1	-1.18722	3.29731	17.5873	0.000317639	0.00824159	3	4	Down-regulated
Sus_scrofa___TEX9	-1.34213	6.00222	17.5763	0.000318547	0.00824466	3	4	Down-regulated
Sus_scrofa___CXCR5	-3.48722	-0.291007	17.2256	0.00031886	0.00824466	3	4	Down-regulated
Sus_scrofa___KBTBD12	-1.81765	0.395259	17.4761	0.000321433	0.0082933	3	4	Down-regulated
Sus_scrofa___ENSSSCG00000043798	-2.16424	-0.684662	17.1366	0.000321982	0.00829439	3	4	Down-regulated
Sus_scrofa___TNK2	-2.36472	5.25156	17.5179	0.000324272	0.00832869	3	4	Down-regulated
Papio_anubis_SF3B1	-2.34176	3.75343	17.5087	0.000325488	0.00834124	3	4	Down-regulated
Sus_scrofa___MTSS2	-1.11942	5.5817	17.4746	0.000328566	0.00839942	3	4	Down-regulated
Sus_scrofa___IGFBP5	-5.28591	-0.0339674	16.8379	0.000330975	0.00844374	3	4	Down-regulated
Sus_scrofa___ENSSSCG00000048674	-1.31705	6.57867	17.4297	0.000333086	0.00847355	3	4	Down-regulated
Sus_scrofa___KIF22	-1.89836	0.526289	17.3448	0.000339379	0.00859681	3	4	Down-regulated
Sus_scrofa___ENSSSCG00000038633	-1.00815	4.76811	17.333	0.000343091	0.00867558	3	4	Down-regulated
Sus_scrofa___SOSTDC1	-4.13432	-0.84877	16.8021	0.000343875	0.00867558	3	4	Down-regulated
Papio_anubis_TPM2	-2.29212	3.42833	17.3133	0.000345765	0.00869545	3	4	Down-regulated
Sus_scrofa___TBATA	-3.84789	-0.886534	16.2809	0.000346253	0.00869545	3	4	Down-regulated
Sus_scrofa___ACSS2	-1.11637	7.4899	17.3014	0.000346401	0.00869545	3	4	Down-regulated
Sus_scrofa___CAVIN4	-1.24481	2.26241	17.3045	0.000346916	0.00869966	3	4	Down-regulated
Sus_scrofa___AP4M1	-1.17949	3.31828	17.2891	0.0003479	0.00871379	3	4	Down-regulated
Sus_scrofa___TET1	-1.17045	5.45327	17.2848	0.000348176	0.00871379	3	4	Down-regulated
Sus_scrofa___RAB3A	-2.43249	0.23133	17.0579	0.000352306	0.00880835	3	4	Down-regulated
Sus_scrofa___ENSSSCG00000045296	-2.3778	3.16594	17.2285	0.00035508	0.00886886	3	4	Down-regulated
Sus_scrofa___TMEM170A	-0.999117	3.76603	17.1963	0.000357845	0.0089201	3	4	Down-regulated
Sus_scrofa___ENKD1	-1.58689	1.82934	17.1632	0.000363266	0.00900145	3	4	Down-regulated
Sus_scrofa___KLHDC3	-1.73169	4.75096	17.1301	0.000365122	0.00902063	3	4	Down-regulated
Papio_anubis_PTPN4	-2.54872	1.41557	17.1102	0.000367938	0.00907086	3	4	Down-regulated
Sus_scrofa___DIPK1A	-0.976703	7.40775	17.0989	0.000368604	0.00907086	3	4	Down-regulated
Sus_scrofa___METTL11B	-3.12185	1.27012	16.9681	0.000372408	0.00912855	3	4	Down-regulated
Sus_scrofa___ENSSSCG00000015036	-1.37136	4.13276	17.0259	0.000377081	0.00922504	3	4	Down-regulated
Sus_scrofa___CASD1	-0.81624	6.18148	16.9952	0.000380582	0.00927628	3	4	Down-regulated
Sus_scrofa___ENSSSCG00000038903	-1.32333	2.76241	16.9726	0.000383778	0.00931957	3	4	Down-regulated
Sus_scrofa___TRIP6	-1.49057	2.33672	16.9679	0.000385103	0.00933911	3	4	Down-regulated
Sus_scrofa___TRIP10	-1.45588	4.80339	16.9367	0.000387543	0.00938276	3	4	Down-regulated
Sus_scrofa___ENSSSCG00000010968	-1.30285	4.61065	16.9358	0.000387652	0.00938276	3	4	Down-regulated
Sus_scrofa___ENSSSCG00000014314	-2.35062	0.845932	16.9166	0.000392926	0.00948288	3	4	Down-regulated
Sus_scrofa___PID1	-4.15686	5.29167	16.8516	0.000398034	0.00956072	3	4	Down-regulated
Sus_scrofa___PFKFB2	-1.27241	4.34738	16.8503	0.000398079	0.00956072	3	4	Down-regulated
Sus_scrofa___ENSSSCG00000046452	-1.356	5.86526	16.8468	0.000398443	0.00956072	3	4	Down-regulated
Sus_scrofa___CLASP2	-1.06066	7.41129	16.8307	0.000400433	0.00957302	3	4	Down-regulated
Sus_scrofa___PYROXD2	-2.08433	2.94098	16.7863	0.000406508	0.0096415	3	4	Down-regulated
Sus_scrofa___ENSSSCG00000034561	-1.65889	2.23119	16.7917	0.000406578	0.0096415	3	4	Down-regulated
Sus_scrofa___AIF1	-2.93182	0.174165	16.3781	0.000406953	0.0096415	3	4	Down-regulated
Sus_scrofa___TPGS2	-1.52963	5.18541	16.7653	0.000408659	0.00966684	3	4	Down-regulated
Sus_scrofa___CIAO3	-1.31205	4.04502	16.7357	0.000412494	0.00974835	3	4	Down-regulated
Sus_scrofa___OR52E4	-2.40747	0.0343342	16.4975	0.000413024	0.00975165	3	4	Down-regulated
Sus_scrofa___SPNS3	-1.65303	1.0546	16.753	0.00041494	0.00978765	3	4	Down-regulated
Sus_scrofa___PPIF	-1.2518	4.24931	16.7089	0.000415927	0.00979247	3	4	Down-regulated
Sus_scrofa___IQCF2	-3.11875	-1.32553	15.92	0.000422847	0.0099367	3	4	Down-regulated
Sus_scrofa___RBFOX1	-1.15594	9.56268	16.6359	0.000425424	0.00995586	3	4	Down-regulated
Sus_scrofa___ANKRD16	-1.17638	3.81032	16.6349	0.000425651	0.00995586	3	4	Down-regulated
Sus_scrofa___FAM131A	-1.42305	1.94627	16.5818	0.000434316	0.010149	3	4	Down-regulated
Sus_scrofa___RINT1	-0.809708	5.31622	16.5491	0.000437101	0.0102046	3	4	Down-regulated
Sus_scrofa___DYNC2I1	-1.02629	3.87609	16.5322	0.000439492	0.0102277	3	4	Down-regulated
Sus_scrofa___ENSSSCG00000012875	-1.734	5.26247	16.53	0.000439724	0.0102277	3	4	Down-regulated
Sus_scrofa___PDE4A	-1.53081	4.9578	16.5141	0.000441925	0.0102693	3	4	Down-regulated
Sus_scrofa___FOXA3	-1.82937	-0.0773437	16.3556	0.000443127	0.0102877	3	4	Down-regulated
Sus_scrofa___NLGN1	-2.21907	5.18923	16.4857	0.000445876	0.0103324	3	4	Down-regulated
Sus_scrofa___WRAP73	-1.3783	3.75432	16.4717	0.000447952	0.0103709	3	4	Down-regulated
Sus_scrofa___ENSSSCG00000004415	-1.46566	4.56108	16.4328	0.000453342	0.0104666	3	4	Down-regulated
Sus_scrofa___NT5DC2	-1.73512	1.82626	16.3742	0.000463987	0.0106633	3	4	Down-regulated
Sus_scrofa___ENSSSCG00000046266	-3.81325	-1.84163	15.205	0.000463994	0.0106633	3	4	Down-regulated
Sus_scrofa___CMYA5	-1.80623	5.37909	16.3197	0.000469687	0.0107744	3	4	Down-regulated
Sus_scrofa___RFTN1	-1.381	7.32211	16.2325	0.000482717	0.0109727	3	4	Down-regulated
Sus_scrofa___ENSSSCG00000043232	-4.49296	1.26568	15.8685	0.000487426	0.0110497	3	4	Down-regulated
Sus_scrofa___PDC	-3.16824	-2.29422	14.488	0.000488472	0.0110633	3	4	Down-regulated
Sus_scrofa___DHRS7C	-3.7761	3.4362	16.182	0.000491594	0.0110878	3	4	Down-regulated
Sus_scrofa___ENSSSCG00000045703	-3.8303	0.833374	15.8881	0.000491614	0.0110878	3	4	Down-regulated
Sus_scrofa___ADAP1	-1.18996	4.74585	16.1738	0.000491766	0.0110878	3	4	Down-regulated
Sus_scrofa___IDH3B	-1.10142	2.84762	16.1595	0.000494428	0.0111177	3	4	Down-regulated
Sus_scrofa___ENSSSCG00000003076	-1.04729	3.04774	16.1517	0.000495483	0.0111315	3	4	Down-regulated
Sus_scrofa___ARHGAP18	-1.924	4.22252	16.1458	0.0004962	0.0111322	3	4	Down-regulated
Sus_scrofa___ENSSSCG00000050753	-2.66029	-0.671628	15.5343	0.000502733	0.0112238	3	4	Down-regulated
Sus_scrofa___SLC9A5	-1.97239	1.70102	16.0832	0.00050344	0.0112296	3	4	Down-regulated
Sus_scrofa___MGST2	-1.53768	4.68536	16.0933	0.000504459	0.011234	3	4	Down-regulated
Sus_scrofa___RIN2	-2.12387	7.1729	16.0882	0.000505217	0.011234	3	4	Down-regulated
Sus_scrofa___MFN2	-0.878976	5.80736	16.0869	0.000505432	0.011234	3	4	Down-regulated
Sus_scrofa___ENSSSCG00000046228	-2.64855	0.0909944	15.8687	0.000508344	0.0112687	3	4	Down-regulated
Sus_scrofa___PAQR9	-1.48286	4.40964	16.0595	0.000509904	0.0112832	3	4	Down-regulated
Sus_scrofa___SLC22A4	-1.73253	1.02979	16.0585	0.000510958	0.0112966	3	4	Down-regulated
Sus_scrofa___ENSSSCG00000047214	-3.20105	-1.98138	14.459	0.000512368	0.0113178	3	4	Down-regulated
Sus_scrofa___CCDC85A	-1.77407	8.29281	16.0042	0.000518843	0.0114507	3	4	Down-regulated
Sus_scrofa___KCNE3	-3.44777	-0.858189	15.3279	0.000527074	0.0115621	3	4	Down-regulated
Sus_scrofa___ENSSSCG00000034843	-1.33706	1.57111	15.9703	0.000527125	0.0115621	3	4	Down-regulated
Sus_scrofa___ENSSSCG00000005529	-1.82349	0.896047	15.9001	0.000531159	0.01162	3	4	Down-regulated
Sus_scrofa___PHF19	-1.69236	3.88475	15.9083	0.000535034	0.011664	3	4	Down-regulated
Sus_scrofa___RSRP1	-1.1269	5.00201	15.8767	0.0005403	0.0117481	3	4	Down-regulated
Sus_scrofa___GRB7	-6.30836	-2.0576	14.3162	0.000548905	0.0118733	3	4	Down-regulated
Sus_scrofa___CENPS	-2.4703	-0.299452	15.4686	0.000551071	0.0118969	3	4	Down-regulated
Sus_scrofa___ENSSSCG00000016623	-2.14469	-0.157896	15.6101	0.000551894	0.0118969	3	4	Down-regulated
Sus_scrofa___ENTPD5	-1.18201	3.90862	15.8044	0.000552994	0.0119103	3	4	Down-regulated
Sus_scrofa___SMARCD1	-1.05483	4.20664	15.8004	0.00055364	0.0119115	3	4	Down-regulated
Sus_scrofa___ENSSSCG00000047922	-1.52386	1.67001	15.8078	0.000554848	0.0119195	3	4	Down-regulated
Sus_scrofa___PLSCR3	-1.65901	1.92882	15.7853	0.000558271	0.0119769	3	4	Down-regulated
Sus_scrofa___PANK4	-1.78445	4.60908	15.7731	0.000558478	0.0119769	3	4	Down-regulated
Sus_scrofa___CCDC102A	-1.46184	0.718626	15.7833	0.000560489	0.0120097	3	4	Down-regulated
Sus_scrofa___PDLIM7	-1.0971	6.91303	15.7431	0.00056378	0.0120596	3	4	Down-regulated
Sus_scrofa___PPFIBP2	-1.3601	7.1845	15.73	0.000566148	0.0120999	3	4	Down-regulated
Sus_scrofa___ENSSSCG00000047475	-2.32885	3.3673	15.7306	0.000566899	0.0121056	3	4	Down-regulated
Sus_scrofa___ENSSSCG00000050005	-3.69698	1.50258	15.6095	0.000570024	0.0121413	3	4	Down-regulated
Sus_scrofa___ENSSSCG00000040911	-3.46958	-1.96313	14.145	0.000573746	0.0121894	3	4	Down-regulated
Sus_scrofa___ENSSSCG00000035477	-1.93411	3.09079	15.6692	0.000578056	0.0122498	3	4	Down-regulated
Sus_scrofa___WNT9B	-2.13684	1.71883	15.6535	0.000581095	0.0122841	3	4	Down-regulated
Sus_scrofa___MCF2L	-1.7907	4.58841	15.6358	0.000583518	0.0123134	3	4	Down-regulated
Sus_scrofa___CYYR1	-1.85388	5.64554	15.6319	0.000584201	0.0123174	3	4	Down-regulated
Sus_scrofa___TSEN54	-1.52359	2.85574	15.6262	0.000585898	0.0123315	3	4	Down-regulated
Papio_anubis_CHN1	-2.54517	-0.476314	15.2025	0.000586346	0.0123315	3	4	Down-regulated
Sus_scrofa___PPIL2	-0.814726	4.86651	15.5999	0.000590231	0.0124028	3	4	Down-regulated
Sus_scrofa___ENSSSCG00000044453	-2.81818	3.59031	15.5932	0.000592344	0.0124367	3	4	Down-regulated
Sus_scrofa___GPR137C	-1.70357	8.15336	15.5789	0.000594201	0.0124653	3	4	Down-regulated
Sus_scrofa___EZH1	-0.80314	5.28412	15.5555	0.000598683	0.0125488	3	4	Down-regulated
Sus_scrofa___ZNF260	-0.781101	5.3845	15.5386	0.000601941	0.0126065	3	4	Down-regulated
Sus_scrofa___KANSL2	-0.889956	5.67725	15.5283	0.000603934	0.0126231	3	4	Down-regulated
Sus_scrofa___ENSSSCG00000050585	-2.04811	3.16772	15.501	0.000610266	0.0127382	3	4	Down-regulated
Sus_scrofa___PALM2AKAP2	-1.1052	9.79396	15.4849	0.000612413	0.0127644	3	4	Down-regulated
Sus_scrofa___PIK3C2G	-1.31793	2.55653	15.4893	0.000612542	0.0127644	3	4	Down-regulated
Sus_scrofa___TMEM247	-3.25666	0.104462	15.1563	0.000614698	0.0127987	3	4	Down-regulated
Sus_scrofa___PASK	-1.10095	2.56522	15.4441	0.000621359	0.0129159	3	4	Down-regulated
Papio_anubis_PHF20	-2.34996	0.379225	15.0828	0.000622239	0.0129231	3	4	Down-regulated
Sus_scrofa___NMD3	-1.12337	7.37512	15.4329	0.00062274	0.0129231	3	4	Down-regulated
Sus_scrofa___FKBPL	-2.10151	-0.318695	15.1985	0.000625986	0.0129583	3	4	Down-regulated
Sus_scrofa___ENSSSCG00000041087	-5.77161	-1.08004	14.6492	0.000627303	0.0129748	3	4	Down-regulated
Sus_scrofa___CDH18	-2.49628	5.89601	15.3916	0.000631114	0.0130428	3	4	Down-regulated
Sus_scrofa___TMEM147	-1.13791	3.94394	15.3666	0.000636319	0.0131179	3	4	Down-regulated
Sus_scrofa___ESRP1	-1.56804	0.797379	15.367	0.000640354	0.0131686	3	4	Down-regulated
Sus_scrofa___ABCA5	-1.39908	6.90112	15.3385	0.000642009	0.013181	3	4	Down-regulated
Sus_scrofa___CCDC22	-0.979618	4.18275	15.3388	0.00064201	0.013181	3	4	Down-regulated
Sus_scrofa___PPOX	-0.916485	3.89345	15.3351	0.000642825	0.0131869	3	4	Down-regulated
Sus_scrofa___GALNT13	-1.75258	3.49915	15.3263	0.000644931	0.0132127	3	4	Down-regulated
Sus_scrofa___FLRT1	-2.51099	3.11655	15.3261	0.00064552	0.0132127	3	4	Down-regulated
Sus_scrofa___ADTRP	-3.10655	-0.0273123	14.8851	0.000649796	0.0132755	3	4	Down-regulated
Sus_scrofa___D2HGDH	-1.17298	4.3184	15.2865	0.000652946	0.0133072	3	4	Down-regulated
Sus_scrofa___ENSSSCG00000050454	-3.89531	-1.99728	13.8853	0.000664122	0.0134692	3	4	Down-regulated
Papio_anubis_PNISR	-1.5483	4.1593	15.2313	0.000664797	0.013472	3	4	Down-regulated
Sus_scrofa___ZNF436	-1.33028	2.3886	15.2043	0.000671665	0.0135891	3	4	Down-regulated
Sus_scrofa___GPD1	-1.05661	3.262	15.1889	0.000674159	0.0136286	3	4	Down-regulated
Sus_scrofa___ENSSSCG00000044658	-3.5682	-0.59451	14.5706	0.000676732	0.0136695	3	4	Down-regulated
Sus_scrofa___SPTAN1	-1.40763	7.70221	15.14	0.000684627	0.0137734	3	4	Down-regulated
Sus_scrofa___TTN	-0.974682	14.628	15.1312	0.000686591	0.0137797	3	4	Down-regulated
Sus_scrofa___ENSSSCG00000029257	-1.5138	3.51227	15.1092	0.000691793	0.0138397	3	4	Down-regulated
Sus_scrofa___RGS16	-2.61063	3.52774	15.1043	0.000693143	0.0138557	3	4	Down-regulated
Sus_scrofa___IFN-ALPHA-8	-2.35452	0.866264	15.0323	0.000695128	0.0138732	3	4	Down-regulated
Sus_scrofa___MST1R	-2.56851	-1.12407	14.3645	0.000705398	0.0140334	3	4	Down-regulated
Sus_scrofa___SHOC1	-1.54872	1.97352	15.0555	0.000706591	0.014046	3	4	Down-regulated
Sus_scrofa___MYOM3	-1.40535	7.24061	14.9897	0.000718963	0.0142241	3	4	Down-regulated
Sus_scrofa___NEBL	-1.08492	12.638	14.9807	0.000721078	0.0142364	3	4	Down-regulated
Sus_scrofa___ENSSSCG00000027916	-0.934874	4.46725	14.98	0.000721293	0.0142364	3	4	Down-regulated
Sus_scrofa___BRD9	-1.11845	5.7408	14.9753	0.000722353	0.0142461	3	4	Down-regulated
Sus_scrofa___ENSSSCG00000043152	-1.97576	1.19865	14.9336	0.000723385	0.0142552	3	4	Down-regulated
Sus_scrofa___PLA2G4A	-1.64529	5.49873	14.9602	0.000725948	0.0142776	3	4	Down-regulated
Sus_scrofa___ENSSSCG00000047603	-3.05896	0.101645	14.7049	0.00072728	0.014287	3	4	Down-regulated
Sus_scrofa___ENSSSCG00000031608	-1.32178	8.69933	14.93	0.000733118	0.0143622	3	4	Down-regulated
Sus_scrofa___IQCA1L	-2.05025	1.71224	14.9282	0.000733851	0.0143622	3	4	Down-regulated
Sus_scrofa___HAGHL	-1.34366	2.39996	14.9145	0.000738249	0.0144232	3	4	Down-regulated
Sus_scrofa___HHATL	-1.85573	-0.282388	14.6416	0.000749172	0.0146024	3	4	Down-regulated
Sus_scrofa___CBLB	-1.1121	8.58803	14.8582	0.000750525	0.0146174	3	4	Down-regulated
Papio_anubis_EPB41L5	-3.7493	-2.41716	13.659	0.00075506	0.0146829	3	4	Down-regulated
Sus_scrofa___LRP4	-1.61006	2.09571	14.8323	0.000759113	0.0147502	3	4	Down-regulated
Sus_scrofa___NIT2	-0.874665	4.91548	14.7906	0.000767388	0.0148879	3	4	Down-regulated
Sus_scrofa___RPS6KA5	-1.36823	7.66928	14.768	0.000773056	0.0149169	3	4	Down-regulated
Sus_scrofa___ENSSSCG00000050806	-4.91493	-2.27578	13.6223	0.000774135	0.0149262	3	4	Down-regulated
Sus_scrofa___PARP1	-1.82078	4.45656	14.7387	0.000780628	0.0149959	3	4	Down-regulated
Sus_scrofa___TRDN	-1.75543	10.2462	14.7342	0.000781679	0.0149959	3	4	Down-regulated
Sus_scrofa___FSD2	-1.98114	6.71562	14.707	0.000788729	0.0151145	3	4	Down-regulated
Sus_scrofa___TYW3	-0.978073	4.03018	14.698	0.000791159	0.0151451	3	4	Down-regulated
Sus_scrofa___OSR1	-1.31538	7.06846	14.6942	0.000792043	0.0151451	3	4	Down-regulated
Sus_scrofa___SNRNP70	-0.954728	8.70886	14.6637	0.000800026	0.0152609	3	4	Down-regulated
Sus_scrofa___CDH11	-4.13622	2.16124	14.6653	0.000802011	0.0152871	3	4	Down-regulated
Sus_scrofa___HIPK4	-1.70707	1.57131	14.6376	0.000810099	0.0153943	3	4	Down-regulated
Sus_scrofa___STOX1	-1.86962	5.66657	14.5912	0.000819397	0.0155239	3	4	Down-regulated
Sus_scrofa___ACTC1	-2.83144	7.82443	14.585	0.000821082	0.0155323	3	4	Down-regulated
Sus_scrofa___PTPRS	-1.47039	3.77883	14.5734	0.000824398	0.015533	3	4	Down-regulated
Sus_scrofa___ADAMTS7	-1.73611	6.76843	14.5711	0.000824845	0.015533	3	4	Down-regulated
Sus_scrofa___SORD	-1.82497	1.48349	14.5553	0.000834688	0.0156595	3	4	Down-regulated
Papio_anubis_ADSS1	-3.49084	-0.725763	13.9361	0.000835317	0.0156595	3	4	Down-regulated
Sus_scrofa___EYA4	-2.82591	5.84624	14.5282	0.000836645	0.0156727	3	4	Down-regulated
Sus_scrofa___B9D2	-1.41924	2.12558	14.5312	0.000837921	0.0156848	3	4	Down-regulated
Sus_scrofa___METAP1D	-0.742472	6.34092	14.5154	0.000840172	0.015693	3	4	Down-regulated
Sus_scrofa___RPAP1	-0.910842	4.45909	14.5116	0.000841281	0.015693	3	4	Down-regulated
Sus_scrofa___FAM217B	-1.75174	1.95882	14.5207	0.000841435	0.015693	3	4	Down-regulated
Sus_scrofa___CEP131	-2.01566	0.980574	14.5124	0.000841489	0.015693	3	4	Down-regulated
Sus_scrofa___BAIAP2L2	-1.54146	1.53678	14.4982	0.000848068	0.0157631	3	4	Down-regulated
Sus_scrofa___KBTBD13	-3.69143	-1.95973	14.4185	0.000848398	0.0157631	3	4	Down-regulated
Sus_scrofa___ENSSSCG00000047958	-2.8313	0.414849	14.2336	0.000866826	0.0160697	3	4	Down-regulated
Sus_scrofa___SIRT4	-1.33381	2.3447	14.413	0.000870661	0.016105	3	4	Down-regulated
Sus_scrofa___PRC1	-1.9957	3.33801	14.3993	0.000873692	0.0161372	3	4	Down-regulated
Sus_scrofa___FAM3A	-0.857607	4.77664	14.3728	0.000880849	0.0162334	3	4	Down-regulated
Sus_scrofa___LSM7	-1.19018	3.71724	14.3362	0.000891813	0.0164113	3	4	Down-regulated
Sus_scrofa___SEMA6C	-1.62192	2.45419	14.3362	0.00089311	0.0164231	3	4	Down-regulated
Sus_scrofa___ENSSSCG00000044155	-1.66357	3.61305	14.3159	0.000897921	0.0164874	3	4	Down-regulated
Sus_scrofa___FGF13	-1.22025	9.69322	14.3044	0.000901067	0.0165209	3	4	Down-regulated
Papio_anubis_AIFM1	-3.37251	-0.949855	13.6244	0.000902108	0.0165279	3	4	Down-regulated
Sus_scrofa___OBSL1	-1.05335	5.23872	14.2844	0.000907127	0.0165955	3	4	Down-regulated
Sus_scrofa___MTG1	-1.17528	3.49356	14.2679	0.000912405	0.0166677	3	4	Down-regulated
Papio_anubis_IFT81	-3.4015	-2.17556	13.0902	0.000914471	0.0166791	3	4	Down-regulated
Sus_scrofa___TMEM150A	-1.49091	1.72643	14.2716	0.00091469	0.0166791	3	4	Down-regulated
Sus_scrofa___ENSSSCG00000040897	-1.95091	2.13374	14.2654	0.000915693	0.0166791	3	4	Down-regulated
Sus_scrofa___PMP2	-5.10874	-2.30682	13.3272	0.000917903	0.0167066	3	4	Down-regulated
Sus_scrofa___FAM135B	-1.10911	2.26252	14.2522	0.000918897	0.0167066	3	4	Down-regulated
Sus_scrofa___COX7A2L	-0.928055	4.8909	14.2389	0.000921002	0.0167149	3	4	Down-regulated
[truncated: 478 more rows]

## Sheet: Fibroblasts
Gene	logFC	logCPM	F	PValue	FDR	Observations_PCMV	Observations_Control	level
Sus_scrofa___hCD46	11.4673	7.63344	239.594	2.95149e-13	5.8224e-09	3	4	Up-regulated
Sus_scrofa___LIPG	5.84572	6.22074	85.9171	5.8136e-10	3.82283e-06	3	4	Up-regulated
Sus_scrofa___RCBTB1	2.72066	6.57629	84.047	1.94524e-09	7.58648e-06	3	4	Up-regulated
Sus_scrofa___PKDCC	4.16315	7.95561	72.4116	8.01273e-09	1.61802e-05	3	4	Up-regulated
Sus_scrofa___ENO1	5.00178	7.27489	71.2283	8.17231e-09	1.61802e-05	3	4	Up-regulated
Sus_scrofa___ASNS	3.29282	5.87187	72.1672	8.20207e-09	1.61802e-05	3	4	Up-regulated
Sus_scrofa___ENSSSCG00000035544	2.38644	6.41652	67.906	1.45821e-08	2.6151e-05	3	4	Up-regulated
Sus_scrofa___ZNF146	1.9135	7.45394	65.1875	2.08732e-08	3.43139e-05	3	4	Up-regulated
Sus_scrofa___CTPS1	5.85879	5.53452	57.3817	3.3173e-08	4.67431e-05	3	4	Up-regulated
Sus_scrofa___ENSSSCG00000038594	4.76702	5.87214	55.9162	3.62541e-08	4.7679e-05	3	4	Up-regulated
Sus_scrofa___MINPP1	4.38034	5.35899	56.3008	4.57073e-08	4.95398e-05	3	4	Up-regulated
Sus_scrofa___ZMAT3	4.85405	4.46239	54.8206	4.61255e-08	4.95398e-05	3	4	Up-regulated
Sus_scrofa___CRLF1	10.7154	5.46115	66.0928	4.90347e-08	4.95398e-05	3	4	Up-regulated
Sus_scrofa___TMEM161B	2.32781	6.23852	59.0562	5.1475e-08	4.95398e-05	3	4	Up-regulated
Sus_scrofa___DZIP1L	3.34242	6.1671	58.1702	5.27367e-08	4.95398e-05	3	4	Up-regulated
Sus_scrofa___PTPA	2.56084	5.34243	57.994	5.9033e-08	5.29338e-05	3	4	Up-regulated
Sus_scrofa___METAP1D	3.3171	5.22001	55.1458	8.16431e-08	6.44229e-05	3	4	Up-regulated
Sus_scrofa___CCDC91	2.20534	7.59891	55.5483	8.68387e-08	6.58872e-05	3	4	Up-regulated
Sus_scrofa___PSMD1	2.0946	7.24536	54.6214	1.00866e-07	7.36957e-05	3	4	Up-regulated
Sus_scrofa___ENSSSCG00000033700	3.09768	5.11883	52.6347	1.12327e-07	7.91387e-05	3	4	Up-regulated
Sus_scrofa___DIPK1A	3.04859	6.64495	52.6949	1.37741e-07	8.77306e-05	3	4	Up-regulated
Sus_scrofa___TSC22D2	3.53059	6.75559	52.7402	1.37864e-07	8.77306e-05	3	4	Up-regulated
Sus_scrofa___USP45	3.36699	4.97298	51.3429	1.5369e-07	9.47448e-05	3	4	Up-regulated
Sus_scrofa___OASL	6.07552	3.03546	45.22	1.63281e-07	9.6025e-05	3	4	Up-regulated
Sus_scrofa___SPATA5	2.59862	8.5157	49.1293	2.48343e-07	0.000136085	3	4	Up-regulated
Sus_scrofa___PABPC4	3.80603	4.99858	46.39	2.60223e-07	0.000138741	3	4	Up-regulated
Sus_scrofa___TEAD3	2.5947	6.40917	47.0204	3.62019e-07	0.000169925	3	4	Up-regulated
Sus_scrofa___NLK	2.58379	6.91018	46.7812	3.76742e-07	0.000169925	3	4	Up-regulated
Sus_scrofa___PTP4A2	2.44053	7.10445	46.7055	3.80364e-07	0.000169925	3	4	Up-regulated
Sus_scrofa___ACVR1B	3.34709	6.25075	46.3516	3.91526e-07	0.000169925	3	4	Up-regulated
Sus_scrofa___PDHX	2.06193	5.54899	46.5384	3.96237e-07	0.000169925	3	4	Up-regulated
Sus_scrofa___METAP1	2.92608	5.54887	45.7149	4.35359e-07	0.000182731	3	4	Up-regulated
Sus_scrofa___INTS13	3.79597	4.34215	42.4873	4.88156e-07	0.000190282	3	4	Up-regulated
Sus_scrofa___ENSSSCG00000009072	2.46351	5.62334	45.2125	4.91935e-07	0.000190282	3	4	Up-regulated
Sus_scrofa___GBE1	2.2823	8.13212	44.8296	5.3003e-07	0.000201075	3	4	Up-regulated
Sus_scrofa___CARNMT1	3.39523	4.65231	43.0267	5.67343e-07	0.000202134	3	4	Up-regulated
Sus_scrofa___GPM6B	1.94615	8.21036	44.2904	5.84561e-07	0.000202134	3	4	Up-regulated
Sus_scrofa___LRP12	3.11494	6.4172	44.2609	5.94302e-07	0.000202134	3	4	Up-regulated
Sus_scrofa___CCDC58	3.9752	4.12623	40.4207	6.80542e-07	0.000207913	3	4	Up-regulated
Sus_scrofa___PRRG1	3.18627	6.02448	43.1908	6.94169e-07	0.000207913	3	4	Up-regulated
Sus_scrofa___ENSSSCG00000027270	4.21612	4.37436	40.348	7.02965e-07	0.000207913	3	4	Up-regulated
Sus_scrofa___TRUB1	3.54179	4.82515	42.8115	7.07196e-07	0.000207913	3	4	Up-regulated
Sus_scrofa___ENSSSCG00000041731	2.07486	6.08014	43.3046	7.10978e-07	0.000207913	3	4	Up-regulated
Sus_scrofa___TNC	4.86643	9.20824	43.1814	7.25193e-07	0.000207913	3	4	Up-regulated
Sus_scrofa___FAM98A	3.10756	5.30043	42.4859	7.35942e-07	0.000207913	3	4	Up-regulated
Sus_scrofa___KPNA3	1.88679	6.54406	42.9953	7.48307e-07	0.000207913	3	4	Up-regulated
Sus_scrofa___VEZT	1.60892	6.55003	42.6431	7.97098e-07	0.000218394	3	4	Up-regulated
Sus_scrofa___OLA1	2.3788	7.42869	42.5421	8.11667e-07	0.00021904	3	4	Up-regulated
Sus_scrofa___TRIB3	5.95392	5.09602	39.6088	8.52876e-07	0.000221377	3	4	Up-regulated
Sus_scrofa___TBRG4	2.63054	5.01584	41.5202	9.2311e-07	0.000236496	3	4	Up-regulated
Sus_scrofa___RHOD	3.96042	4.76807	39.125	9.89727e-07	0.000243798	3	4	Up-regulated
Sus_scrofa___SRPK2	1.61957	8.7791	41.2904	1.02535e-06	0.000243798	3	4	Up-regulated
Sus_scrofa___MRS2	3.90034	4.49643	38.789	1.02918e-06	0.000243798	3	4	Up-regulated
Sus_scrofa___PGRMC1	3.30153	4.84015	39.3531	1.19515e-06	0.000274147	3	4	Up-regulated
Sus_scrofa___MUL1	2.43947	4.25768	39.2441	1.27542e-06	0.000278495	3	4	Up-regulated
Sus_scrofa___NSUN3	3.35219	6.00534	39.9608	1.28469e-06	0.000278495	3	4	Up-regulated
Sus_scrofa___VMP1	2.38677	9.02731	39.9982	1.31761e-06	0.000282526	3	4	Up-regulated
Sus_scrofa___TUSC3	4.31266	5.98389	39.1358	1.41179e-06	0.000296281	3	4	Up-regulated
Sus_scrofa___ENSSSCG00000004983	2.59998	5.48189	39.4269	1.43364e-06	0.000297699	3	4	Up-regulated
Sus_scrofa___PDSS2	2.03826	6.12089	39.1452	1.57546e-06	0.000321926	3	4	Up-regulated
Sus_scrofa___ERCC6	2.27434	5.05175	38.8768	1.60743e-06	0.00032357	3	4	Up-regulated
Sus_scrofa___ENSSSCG00000014132	3.29765	4.29652	37.0126	1.84057e-06	0.000359493	3	4	Up-regulated
Sus_scrofa___MRPS30	3.12742	5.44165	37.5184	1.88989e-06	0.000361335	3	4	Up-regulated
Sus_scrofa___TAF4B	2.93646	6.19654	38.0664	1.93363e-06	0.000362348	3	4	Up-regulated
Sus_scrofa___TOMM70	2.16736	5.95447	37.7604	2.08224e-06	0.000379912	3	4	Up-regulated
Sus_scrofa___STC2	6.51971	5.64948	34.5452	2.44263e-06	0.000417927	3	4	Up-regulated
Sus_scrofa___PANK2	2.65224	5.28005	36.8202	2.47871e-06	0.000417927	3	4	Up-regulated
Sus_scrofa___EIF3J	1.85558	5.69815	36.5047	2.69795e-06	0.000443521	3	4	Up-regulated
Sus_scrofa___FGFR2	3.36417	7.38009	36.0925	2.93118e-06	0.000473962	3	4	Up-regulated
Sus_scrofa___ADK	2.30042	7.22231	35.8626	3.06326e-06	0.000489535	3	4	Up-regulated
Sus_scrofa___ENC1	3.33445	4.15464	35.0625	3.0892e-06	0.000489535	3	4	Up-regulated
Sus_scrofa___NAA25	2.10744	6.94795	35.732	3.14708e-06	0.000489535	3	4	Up-regulated
Sus_scrofa___TMEM38B	4.46478	4.63155	33.4825	3.15156e-06	0.000489535	3	4	Up-regulated
Sus_scrofa___SPOCK3	3.2923	7.01666	35.4003	3.36906e-06	0.00051923	3	4	Up-regulated
Sus_scrofa___EMC2	3.6912	5.88019	34.9433	3.63722e-06	0.000547721	3	4	Up-regulated
Sus_scrofa___ENSSSCG00000023850	3.56543	5.29306	34.2774	3.67082e-06	0.000548593	3	4	Up-regulated
Sus_scrofa___SELENOM	2.15972	4.45779	34.6332	3.85932e-06	0.000563947	3	4	Up-regulated
Sus_scrofa___DNAJC24	2.28476	5.35834	34.328	4.22094e-06	0.00060338	3	4	Up-regulated
Sus_scrofa___LMNA	2.12089	6.44467	34.2904	4.29268e-06	0.00060922	3	4	Up-regulated
Sus_scrofa___NAMPT	2.51206	6.46525	34.1847	4.39517e-06	0.000615651	3	4	Up-regulated
Sus_scrofa___PLXNA4	2.526	10.0984	34.0979	4.43345e-06	0.000615906	3	4	Up-regulated
Sus_scrofa___SLC4A1AP	1.73021	6.0264	33.9636	4.60676e-06	0.000635507	3	4	Up-regulated
Sus_scrofa___RASSF8	1.48834	8.2189	33.791	4.73987e-06	0.000644851	3	4	Up-regulated
Sus_scrofa___IL4R	3.13082	7.29733	33.4341	5.1692e-06	0.000684382	3	4	Up-regulated
Sus_scrofa___C18orf25	2.04234	6.54345	33.2839	5.32922e-06	0.000696222	3	4	Up-regulated
Sus_scrofa___R3HDM1	1.61133	7.6639	33.1955	5.40112e-06	0.000700973	3	4	Up-regulated
Sus_scrofa___TXNDC5	1.55774	5.7346	32.86	5.86824e-06	0.000737342	3	4	Up-regulated
Sus_scrofa___PDE4B	4.4246	7.92243	32.7837	5.95513e-06	0.000743525	3	4	Up-regulated
Sus_scrofa___NUFIP2	1.2956	7.92154	32.7085	6.01195e-06	0.000745898	3	4	Up-regulated
Sus_scrofa___FBXO4	2.10362	5.27558	32.5888	6.12727e-06	0.000750761	3	4	Up-regulated
Sus_scrofa___SETDB2	2.58283	4.79918	32.2951	6.2721e-06	0.000763764	3	4	Up-regulated
Sus_scrofa___RPSA	1.96067	6.56965	32.3921	6.47043e-06	0.000778467	3	4	Up-regulated
Sus_scrofa___ENSSSCG00000031462	1.88655	7.99481	32.1761	6.76965e-06	0.000791249	3	4	Up-regulated
Sus_scrofa___LPCAT3	2.71201	4.81882	31.931	6.77858e-06	0.000791249	3	4	Up-regulated
Sus_scrofa___MRPL35	3.7631	3.63052	30.4769	6.889e-06	0.000799408	3	4	Up-regulated
Sus_scrofa___TIMP1	4.09745	6.27567	31.6196	7.17136e-06	0.000827306	3	4	Up-regulated
Sus_scrofa___TIMMDC1	1.53955	6.1998	31.8293	7.3698e-06	0.00084037	3	4	Up-regulated
Sus_scrofa___TMEM165	1.93099	5.59852	31.7513	7.51185e-06	0.00084577	3	4	Up-regulated
Sus_scrofa___ENSSSCG00000032067	3.33596	4.54161	30.5519	7.54578e-06	0.00084577	3	4	Up-regulated
Sus_scrofa___URGCP	2.24001	5.63364	31.5543	7.82561e-06	0.000872179	3	4	Up-regulated
Sus_scrofa___SSR2	1.53078	5.98958	31.487	7.96323e-06	0.00088025	3	4	Up-regulated
Sus_scrofa___ARHGAP5	1.56626	7.78117	31.4142	8.03742e-06	0.00088025	3	4	Up-regulated
Sus_scrofa___PPME1	2.47457	6.03816	31.4441	8.07651e-06	0.00088025	3	4	Up-regulated
Sus_scrofa___SLC20A2	3.56215	6.75509	31.3215	8.25281e-06	0.000893661	3	4	Up-regulated
Sus_scrofa___HSD17B12	1.73061	6.48179	31.2163	8.44958e-06	0.000902194	3	4	Up-regulated
Sus_scrofa___FSTL3	3.96267	4.61093	29.7874	8.66074e-06	0.000918551	3	4	Up-regulated
Sus_scrofa___ENSSSCG00000038009	3.31949	3.8362	29.3463	8.9299e-06	0.000932669	3	4	Up-regulated
Sus_scrofa___CDH11	2.16955	9.58072	30.9247	8.98298e-06	0.000932669	3	4	Up-regulated
Sus_scrofa___STT3B	1.47065	7.58267	30.8791	9.08466e-06	0.000936895	3	4	Up-regulated
Sus_scrofa___UCK2	3.1492	6.28178	30.3628	9.11866e-06	0.000936895	3	4	Up-regulated
Sus_scrofa___BACH1	1.68712	7.18861	30.8448	9.16668e-06	0.000936949	3	4	Up-regulated
Sus_scrofa___TFB2M	3.59373	4.04818	29.0526	9.3508e-06	0.000945253	3	4	Up-regulated
Sus_scrofa___SNX3	1.67962	5.80966	30.7811	9.37787e-06	0.000945253	3	4	Up-regulated
Sus_scrofa___XPO5	1.73426	5.7966	30.7719	9.39961e-06	0.000945253	3	4	Up-regulated
Sus_scrofa___TTC23	3.68058	4.26909	29.5363	9.62664e-06	0.000959114	3	4	Up-regulated
Sus_scrofa___CTSH	1.76149	7.32753	30.5749	9.75513e-06	0.000967032	3	4	Up-regulated
Sus_scrofa___PINX1	1.634	6.40503	30.5123	9.95039e-06	0.000975065	3	4	Up-regulated
Sus_scrofa___BAG3	2.97031	5.31619	30.0598	1.00874e-05	0.000976852	3	4	Up-regulated
Sus_scrofa___ZNF793	2.23217	5.17239	30.315	1.02655e-05	0.000987843	3	4	Up-regulated
Sus_scrofa___PSMD14	1.84946	6.76132	30.3393	1.0317e-05	0.000987976	3	4	Up-regulated
Sus_scrofa___ENSSSCG00000011290	4.17913	3.87967	28.6989	1.04441e-05	0.000990535	3	4	Up-regulated
Sus_scrofa___CCSER2	1.38713	7.31368	30.0747	1.09415e-05	0.00102782	3	4	Up-regulated
Sus_scrofa___PIAS2	1.51477	6.82524	30.0583	1.09969e-05	0.00102813	3	4	Up-regulated
Sus_scrofa___GBF1	1.29027	8.3857	29.9333	1.12999e-05	0.00104165	3	4	Up-regulated
Sus_scrofa___ATAD1	1.63078	7.85047	29.9069	1.13721e-05	0.0010429	3	4	Up-regulated
Sus_scrofa___FAM162A	3.50606	5.27897	29.4728	1.14192e-05	0.0010429	3	4	Up-regulated
Sus_scrofa___SERPINH1	2.14656	6.27723	29.8932	1.14901e-05	0.00104454	3	4	Up-regulated
Sus_scrofa___PDLIM7	3.3393	7.1724	29.8493	1.15899e-05	0.00104878	3	4	Up-regulated
Sus_scrofa___PSMC1	2.00512	4.99741	29.6281	1.20816e-05	0.00107404	3	4	Up-regulated
Sus_scrofa___ABCB7	1.59672	6.75128	29.6567	1.20868e-05	0.00107404	3	4	Up-regulated
Sus_scrofa___DPH5	2.79488	4.98763	29.1375	1.21897e-05	0.00107512	3	4	Up-regulated
Sus_scrofa___ETFA	1.59549	6.86536	29.5592	1.23581e-05	0.0010835	3	4	Up-regulated
Sus_scrofa___PSMB2	1.62406	7.07526	29.482	1.25782e-05	0.00109792	3	4	Up-regulated
Sus_scrofa___KDM4C	1.12768	8.05569	29.2688	1.32103e-05	0.00113304	3	4	Up-regulated
Sus_scrofa___ENSSSCG00000030478	2.22558	5.06984	29.2105	1.33399e-05	0.00113921	3	4	Up-regulated
Sus_scrofa___SMARCA4	1.52517	6.89764	29.1714	1.35484e-05	0.00115202	3	4	Up-regulated
Sus_scrofa___ZNF654	2.248	7.37127	29.0312	1.39997e-05	0.00116529	3	4	Up-regulated
Sus_scrofa___SLC25A20	2.68835	4.53932	28.6785	1.42607e-05	0.00117217	3	4	Up-regulated
Sus_scrofa___PPP4R4	3.42693	3.25976	26.7542	1.49353e-05	0.00121739	3	4	Up-regulated
Sus_scrofa___PAPPA	2.70268	8.74692	28.7359	1.4996e-05	0.00121739	3	4	Up-regulated
Sus_scrofa___UQCC1	1.99179	5.98449	28.6727	1.53563e-05	0.00123647	3	4	Up-regulated
Sus_scrofa___ENSSSCG00000005241	2.59183	4.02453	27.7223	1.5627e-05	0.00125315	3	4	Up-regulated
Sus_scrofa___GNL3	2.23171	5.49113	28.3974	1.61179e-05	0.00127576	3	4	Up-regulated
Sus_scrofa___SOCS5	1.36659	8.25857	28.4213	1.61677e-05	0.00127576	3	4	Up-regulated
Sus_scrofa___HACD1	3.77799	4.3086	27.1633	1.69825e-05	0.00131378	3	4	Up-regulated
Sus_scrofa___ALDH3A2	1.31289	7.21358	28.1488	1.72889e-05	0.00132175	3	4	Up-regulated
Sus_scrofa___LRRFIP1	2.50136	8.68765	28.1151	1.74097e-05	0.00132175	3	4	Up-regulated
Sus_scrofa___RTN4IP1	3.34732	4.06062	26.7871	1.76085e-05	0.00132175	3	4	Up-regulated
Sus_scrofa___IDE	1.45879	6.76364	27.9945	1.79613e-05	0.00134096	3	4	Up-regulated
Sus_scrofa___GPHN	1.07034	9.60386	27.9571	1.80816e-05	0.00134096	3	4	Up-regulated
Sus_scrofa___NFIL3	4.94754	5.64472	26.7331	1.86508e-05	0.00137414	3	4	Up-regulated
Sus_scrofa___CMSS1	1.80896	9.28226	27.7766	1.88944e-05	0.00138048	3	4	Up-regulated
Sus_scrofa___TOPAZ1	2.01828	6.92729	27.7714	1.8981e-05	0.00138169	3	4	Up-regulated
Sus_scrofa___MTX2	1.6651	5.98523	27.6627	1.95652e-05	0.00141898	3	4	Up-regulated
Sus_scrofa___GPD2	2.5325	6.1706	27.3757	2.10323e-05	0.00149785	3	4	Up-regulated
Sus_scrofa___NANS	1.37304	6.52216	27.3066	2.12655e-05	0.00150901	3	4	Up-regulated
Sus_scrofa___S100A11	2.15856	4.78706	27.2233	2.16697e-05	0.00152127	3	4	Up-regulated
Sus_scrofa___MYC	3.37755	4.86369	26.6159	2.204e-05	0.00153653	3	4	Up-regulated
Sus_scrofa___TAGLN	2.1371	6.63987	27.0935	2.24749e-05	0.00154732	3	4	Up-regulated
Sus_scrofa___NMD3	2.32405	5.98729	27.0924	2.25313e-05	0.00154732	3	4	Up-regulated
Sus_scrofa___CAPRIN1	1.01104	7.48196	26.9589	2.31049e-05	0.00157713	3	4	Up-regulated
Sus_scrofa___MTCH2	2.70192	4.35382	26.2652	2.35907e-05	0.00159922	3	4	Up-regulated
Sus_scrofa___ZNF23	3.20694	3.31488	25.5198	2.37876e-05	0.00160635	3	4	Up-regulated
Sus_scrofa___CSRNP1	3.19835	4.49359	26.2272	2.38587e-05	0.00160635	3	4	Up-regulated
Sus_scrofa___KIF12	5.10915	2.66322	24.8047	2.40834e-05	0.00161596	3	4	Up-regulated
Sus_scrofa___RBKS	1.67947	6.09095	26.6639	2.49885e-05	0.00165391	3	4	Up-regulated
Sus_scrofa___C16orf72	1.55645	6.15072	26.6612	2.50103e-05	0.00165391	3	4	Up-regulated
Sus_scrofa___COX10	2.92311	4.95479	26.4237	2.52201e-05	0.00165839	3	4	Up-regulated
Sus_scrofa___BCL2L13	1.61885	6.43126	26.5986	2.5365e-05	0.00166237	3	4	Up-regulated
Sus_scrofa___DAG1	2.71901	5.67205	26.5605	2.55834e-05	0.0016632	3	4	Up-regulated
Sus_scrofa___ALS2	3.01246	5.25738	26.4058	2.5601e-05	0.0016632	3	4	Up-regulated
Sus_scrofa___VDAC1	1.72818	5.82114	26.5582	2.5737e-05	0.0016632	3	4	Up-regulated
Sus_scrofa___ENSSSCG00000029761	4.7464	2.04659	23.1805	2.57991e-05	0.0016632	3	4	Up-regulated
Sus_scrofa___SLC20A1	2.20909	6.54927	26.4771	2.62277e-05	0.00168532	3	4	Up-regulated
Sus_scrofa___CDC42EP3	5.84402	5.60556	25.2214	2.63611e-05	0.0016884	3	4	Up-regulated
Sus_scrofa___DDX60	5.45649	6.41641	25.9058	2.70794e-05	0.00172321	3	4	Up-regulated
Sus_scrofa___MPC2	3.44295	4.3699	25.6587	2.74586e-05	0.00173614	3	4	Up-regulated
Sus_scrofa___ENSSSCG00000035570	1.94689	6.48678	26.2643	2.76152e-05	0.00174046	3	4	Up-regulated
Sus_scrofa___ASCC3	1.12573	8.37381	26.1054	2.85858e-05	0.00176775	3	4	Up-regulated
Sus_scrofa___ADAR	1.91787	6.13809	26.0754	2.89535e-05	0.00177933	3	4	Up-regulated
Sus_scrofa___DERL1	2.38064	5.62032	25.9752	2.93973e-05	0.00179254	3	4	Up-regulated
Sus_scrofa___GNPDA2	2.51123	5.38812	25.93	2.99427e-05	0.00180996	3	4	Up-regulated
Sus_scrofa___IRF7	3.86456	3.78914	24.6432	3.05032e-05	0.00183457	3	4	Up-regulated
Sus_scrofa___ENSSSCG00000032999	3.64714	3.6535	24.8459	3.07691e-05	0.00184493	3	4	Up-regulated
Sus_scrofa___SLC39A14	2.02556	9.30359	25.7995	3.08825e-05	0.00184612	3	4	Up-regulated
Sus_scrofa___SLC35A1	1.40734	6.0217	25.801	3.10179e-05	0.00184861	3	4	Up-regulated
Sus_scrofa___PBLD	2.15548	4.59013	25.7339	3.11998e-05	0.00185385	3	4	Up-regulated
Sus_scrofa___VCP	2.35179	5.2429	25.6495	3.2148e-05	0.00189876	3	4	Up-regulated
Sus_scrofa___ATP13A3	3.07754	7.63133	25.6102	3.25274e-05	0.00190411	3	4	Up-regulated
Sus_scrofa___CES1	6.91581	3.22287	27.2651	3.25282e-05	0.00190411	3	4	Up-regulated
Sus_scrofa___ENSSSCG00000017754	2.73641	5.26176	25.5184	3.36446e-05	0.00195208	3	4	Up-regulated
Sus_scrofa___ENSSSCG00000000908	1.37698	5.98852	25.471	3.37873e-05	0.0019546	3	4	Up-regulated
Sus_scrofa___ABCD3	1.98738	5.48895	25.3468	3.49812e-05	0.00200675	3	4	Up-regulated
Sus_scrofa___GDF15	6.22135	1.14476	25.9955	3.49938e-05	0.00200675	3	4	Up-regulated
Sus_scrofa___PTX3	4.33755	6.86804	24.9633	3.69222e-05	0.00208701	3	4	Up-regulated
Sus_scrofa___ACTB	2.6303	5.95681	24.9993	3.81845e-05	0.00213996	3	4	Up-regulated
Sus_scrofa___PMAIP1	3.68277	3.34779	23.6478	3.85934e-05	0.00215675	3	4	Up-regulated
Sus_scrofa___HSPA5	3.01519	5.58135	24.5804	3.90395e-05	0.00217001	3	4	Up-regulated
Sus_scrofa___SLC7A2	3.49683	4.92617	24.2104	3.97831e-05	0.00219354	3	4	Up-regulated
Sus_scrofa___P2RX4	3.14289	3.66914	23.6903	3.98077e-05	0.00219354	3	4	Up-regulated
Sus_scrofa___ENSSSCG00000009240	3.8231	5.51465	24.7997	4.01727e-05	0.00220566	3	4	Up-regulated
Sus_scrofa___SIAH2	2.7213	4.14349	24.1871	4.04012e-05	0.00220774	3	4	Up-regulated
Sus_scrofa___SLC25A33	4.8384	3.94184	23.9916	4.0524e-05	0.00220834	3	4	Up-regulated
Sus_scrofa___UBXN4	1.32399	6.90983	24.7296	4.06869e-05	0.0022111	3	4	Up-regulated
Sus_scrofa___NDUFS2	1.95403	4.81291	24.7071	4.11433e-05	0.00222976	3	4	Up-regulated
Sus_scrofa___PEAK1	1.64774	9.99463	24.5759	4.22845e-05	0.00227909	3	4	Up-regulated
Sus_scrofa___PYM1	2.9281	4.05386	23.3869	4.43794e-05	0.0023686	3	4	Up-regulated
Sus_scrofa___AHR	2.47486	5.84826	24.2586	4.63342e-05	0.00243742	3	4	Up-regulated
Sus_scrofa___CCL2	2.9419	7.9404	24.2153	4.65766e-05	0.00244366	3	4	Up-regulated
Sus_scrofa___ENSSSCG00000004830	2.1704	8.56864	24.1152	4.77107e-05	0.00248992	3	4	Up-regulated
Sus_scrofa___QRSL1	3.47638	3.44797	23.0816	4.84385e-05	0.00250799	3	4	Up-regulated
Sus_scrofa___RPL31	1.53962	8.50603	24.0446	4.86044e-05	0.00250976	3	4	Up-regulated
Sus_scrofa___ITPRID1	3.92758	3.15178	22.0992	4.8727e-05	0.00250976	3	4	Up-regulated
Sus_scrofa___ENSSSCG00000027124	4.26773	3.12489	23.084	4.97323e-05	0.00255487	3	4	Up-regulated
Sus_scrofa___PTGS2	4.65445	6.66331	23.502	5.1445e-05	0.00262916	3	4	Up-regulated
Sus_scrofa___AEN	3.24052	3.80979	22.7259	5.21466e-05	0.00265231	3	4	Up-regulated
Sus_scrofa___TPK1	2.91548	5.4343	23.7333	5.24467e-05	0.00265231	3	4	Up-regulated
Sus_scrofa___MCCC1	1.20838	7.16223	23.7009	5.32519e-05	0.00265823	3	4	Up-regulated
Sus_scrofa___CSTF3	1.29347	7.56023	23.6933	5.33455e-05	0.00265823	3	4	Up-regulated
Sus_scrofa___MED28	2.42268	3.43674	22.8584	5.3478e-05	0.00265823	3	4	Up-regulated
Sus_scrofa___DPH6	1.3818	7.04692	23.6714	5.36877e-05	0.00265823	3	4	Up-regulated
Sus_scrofa___NOCT	5.58207	4.88483	22.6947	5.37707e-05	0.00265823	3	4	Up-regulated
Sus_scrofa___PPTC7	2.86564	4.78257	23.5085	5.38557e-05	0.00265823	3	4	Up-regulated
Sus_scrofa___ANPEP	4.42001	5.07327	22.5551	5.39967e-05	0.00265823	3	4	Up-regulated
Sus_scrofa___GOLT1B	1.59053	4.68766	23.5899	5.49221e-05	0.0026818	3	4	Up-regulated
Sus_scrofa___TMEM263	1.94122	5.36847	23.5754	5.5394e-05	0.00268928	3	4	Up-regulated
Sus_scrofa___LARP4	1.34314	7.47096	23.5429	5.55256e-05	0.00268928	3	4	Up-regulated
Sus_scrofa___ENSSSCG00000003989	2.11603	5.43555	23.5552	5.55733e-05	0.00268928	3	4	Up-regulated
Sus_scrofa___IER3	6.70801	5.32904	22.9829	5.56205e-05	0.00268928	3	4	Up-regulated
Sus_scrofa___MRPS35	1.93452	5.3891	23.5313	5.58733e-05	0.00269127	3	4	Up-regulated
Sus_scrofa___EPHA7	3.82613	7.20461	23.5268	5.60966e-05	0.00269127	3	4	Up-regulated
Sus_scrofa___ENSSSCG00000003253	2.09693	6.51101	23.5151	5.62516e-05	0.00269127	3	4	Up-regulated
Sus_scrofa___TMX2	2.00839	4.68891	23.2665	5.67451e-05	0.00270389	3	4	Up-regulated
Sus_scrofa___REEP3	1.21057	8.80297	23.3027	5.9177e-05	0.00278493	3	4	Up-regulated
Sus_scrofa___BPNT2	1.70825	5.61163	23.3281	5.9293e-05	0.00278493	3	4	Up-regulated
Sus_scrofa___ANKRD17	1.12922	8.85504	23.2653	5.97713e-05	0.00280073	3	4	Up-regulated
Sus_scrofa___ERC1	2.06112	9.221	23.2323	6.03056e-05	0.00281907	3	4	Up-regulated
Sus_scrofa___ENSSSCG00000016191	3.92156	3.36452	22.5079	6.10936e-05	0.00284916	3	4	Up-regulated
Sus_scrofa___CHST11	2.68003	8.86	23.1482	6.17217e-05	0.00287166	3	4	Up-regulated
Sus_scrofa___TMEM70	2.71362	4.3619	22.6006	6.31818e-05	0.00292579	3	4	Up-regulated
Sus_scrofa___REV3L	1.08549	9.27408	23.0434	6.34398e-05	0.00293086	3	4	Up-regulated
Sus_scrofa___HIPK3	1.5696	7.36945	22.9385	6.53121e-05	0.00300329	3	4	Up-regulated
Sus_scrofa___WDR89	2.00642	5.02394	22.8723	6.61479e-05	0.0030206	3	4	Up-regulated
Sus_scrofa___DISP1	1.42895	9.53977	22.8485	6.68623e-05	0.00304344	3	4	Up-regulated
Sus_scrofa___FBXO30	2.69606	5.34152	22.7953	6.69831e-05	0.00304344	3	4	Up-regulated
Sus_scrofa___NARS2	1.75837	6.0059	22.8048	6.80367e-05	0.00306396	3	4	Up-regulated
Sus_scrofa___AGPAT2	1.9394	6.02747	22.7831	6.85263e-05	0.00306535	3	4	Up-regulated
Sus_scrofa___ENSSSCG00000003077	3.31548	3.48436	21.7814	6.89367e-05	0.00307673	3	4	Up-regulated
Sus_scrofa___LUZP1	1.56692	7.7065	22.6815	6.9989e-05	0.00311664	3	4	Up-regulated
Sus_scrofa___LGALS3BP	4.62314	4.65897	21.9799	7.07209e-05	0.00312863	3	4	Up-regulated
Sus_scrofa___GADD45B	3.2448	5.49752	22.496	7.1106e-05	0.00313105	3	4	Up-regulated
Sus_scrofa___VPS37A	2.0164	5.32069	22.6174	7.15994e-05	0.00314204	3	4	Up-regulated
Sus_scrofa___SHISA9	8.00292	5.85153	21.5568	7.19062e-05	0.00314204	3	4	Up-regulated
Sus_scrofa___MTDH	1.03789	7.84515	22.5385	7.2746e-05	0.00316093	3	4	Up-regulated
Sus_scrofa___FGF14	2.30431	3.9606	22.4454	7.34724e-05	0.00318547	3	4	Up-regulated
Sus_scrofa___DGKI	4.41567	5.27564	21.5368	7.40231e-05	0.00319531	3	4	Up-regulated
Sus_scrofa___ENSSSCG00000016629	2.33247	8.64366	22.4746	7.40234e-05	0.00319531	3	4	Up-regulated
Sus_scrofa___ZNF827	1.96879	6.8311	22.4321	7.49987e-05	0.00322331	3	4	Up-regulated
Sus_scrofa___ENSSSCG00000030335	2.76787	2.18543	19.881	7.91044e-05	0.00337039	3	4	Up-regulated
Sus_scrofa___USP53	2.79701	8.69804	22.2235	7.93022e-05	0.00337154	3	4	Up-regulated
Sus_scrofa___RGS2	4.32835	5.76466	21.979	8.18744e-05	0.00345115	3	4	Up-regulated
Sus_scrofa___XPNPEP2	2.75951	4.65621	22.0698	8.25171e-05	0.00347082	3	4	Up-regulated
Sus_scrofa___TTC27	2.06365	6.70538	22.0646	8.32127e-05	0.00348522	3	4	Up-regulated
Sus_scrofa___ENSSSCG00000033750	3.38546	4.00104	21.0344	8.47277e-05	0.00353366	3	4	Up-regulated
Sus_scrofa___KPNA7	1.82906	5.33405	21.9676	8.57178e-05	0.00355243	3	4	Up-regulated
Sus_scrofa___COL16A1	1.37216	6.80279	21.8349	8.83444e-05	0.00365361	3	4	Up-regulated
Sus_scrofa___FEM1B	3.94038	2.95617	21.2563	8.95544e-05	0.00368216	3	4	Up-regulated
Sus_scrofa___FARSA	2.64499	4.33122	21.2256	9.02126e-05	0.00369984	3	4	Up-regulated
Sus_scrofa___LARP1B	3.48659	4.19524	20.9511	9.04716e-05	0.00370277	3	4	Up-regulated
Sus_scrofa___TRAPPC13	3.03327	4.52316	21.3554	9.15426e-05	0.00372007	3	4	Up-regulated
Sus_scrofa___MRPS27	1.46916	6.78784	21.7065	9.16423e-05	0.00372007	3	4	Up-regulated
Sus_scrofa___TMEM176A	2.77174	2.99587	20.6794	9.16487e-05	0.00372007	3	4	Up-regulated
Sus_scrofa___DNAJC1	1.43899	8.62751	21.6901	9.18437e-05	0.00372033	3	4	Up-regulated
Sus_scrofa___LCLAT1	1.88306	6.44073	21.6565	9.29854e-05	0.00375886	3	4	Up-regulated
Sus_scrofa___PMS1	2.23275	5.72982	21.6512	9.3369e-05	0.00376665	3	4	Up-regulated
Sus_scrofa___ENSSSCG00000034802	3.96993	2.53901	20.0215	9.40142e-05	0.00378333	3	4	Up-regulated
Sus_scrofa___ENSSSCG00000013696	1.85728	5.07945	21.5982	9.41662e-05	0.00378333	3	4	Up-regulated
Sus_scrofa___DNAJA3	1.58721	5.25977	21.5987	9.4936e-05	0.00380205	3	4	Up-regulated
Sus_scrofa___ZNF131	1.52706	5.52468	21.5876	9.52103e-05	0.00380205	3	4	Up-regulated
Sus_scrofa___C14orf119	2.26663	3.48228	21.2211	9.55922e-05	0.00380959	3	4	Up-regulated
Sus_scrofa___VWA8	1.52298	6.77176	21.5287	9.62818e-05	0.00381203	3	4	Up-regulated
Sus_scrofa___NOP58	1.20915	7.24077	21.5153	9.64793e-05	0.00381203	3	4	Up-regulated
Sus_scrofa___ZNF792	2.1642	4.60116	21.5217	9.70814e-05	0.00381203	3	4	Up-regulated
Sus_scrofa___ACAD10	2.33175	4.96393	21.5	9.71994e-05	0.00381203	3	4	Up-regulated
Sus_scrofa___ZNF248	1.69199	5.82131	21.4883	9.77424e-05	0.00382303	3	4	Up-regulated
Sus_scrofa___ADAMTS9	2.27577	8.50108	21.3841	0.000100044	0.00388528	3	4	Up-regulated
Sus_scrofa___ISG15	6.72757	6.15168	20.421	0.000100666	0.00389816	3	4	Up-regulated
Sus_scrofa___PAK4	2.04115	4.42437	21.1434	0.000101397	0.00391439	3	4	Up-regulated
Sus_scrofa___DNAJC11	1.43457	6.05409	21.3231	0.000102246	0.00393514	3	4	Up-regulated
Sus_scrofa___CRLS1	1.97104	5.3289	21.3093	0.000102333	0.00393514	3	4	Up-regulated
Sus_scrofa___ENSSSCG00000021200	1.44965	7.61829	21.2855	0.00010284	0.00394692	3	4	Up-regulated
Sus_scrofa___BTBD1	1.73637	6.09204	21.2582	0.000104199	0.00399084	3	4	Up-regulated
Sus_scrofa___PSMD11	1.40045	5.19449	21.265	0.000104637	0.00399261	3	4	Up-regulated
Sus_scrofa___SUPT3H	1.29805	7.37326	21.2004	0.000105334	0.00400864	3	4	Up-regulated
Sus_scrofa___FZD2	2.73249	2.32324	19.0202	0.000105464	0.00400864	3	4	Up-regulated
Sus_scrofa___COA7	3.64764	3.78896	20.5826	0.000105971	0.00402016	3	4	Up-regulated
Sus_scrofa___SELENOS	1.7138	4.87369	21.1721	0.000106445	0.00403039	3	4	Up-regulated
Sus_scrofa___AMPD3	5.72857	4.27392	19.7838	0.00011068	0.00414305	3	4	Up-regulated
Sus_scrofa___DNAJB1	3.80094	3.18974	20.143	0.000112581	0.00416879	3	4	Up-regulated
Sus_scrofa___OAS2	4.52633	8.67305	20.967	0.000112705	0.00416879	3	4	Up-regulated
Sus_scrofa___NAA40	2.87499	3.44411	20.0907	0.000112885	0.00416879	3	4	Up-regulated
Sus_scrofa___ENSSSCG00000010968	2.48697	5.58776	20.8866	0.000114202	0.0042031	3	4	Up-regulated
Sus_scrofa___RSAD2	5.63444	6.5098	20.3674	0.000115267	0.00423078	3	4	Up-regulated
Sus_scrofa___CCN1	3.89213	6.76656	20.7158	0.000116458	0.00425437	3	4	Up-regulated
Sus_scrofa___ENSSSCG00000013366	2.54813	5.4598	20.7786	0.000119023	0.00434003	3	4	Up-regulated
Sus_scrofa___ENSSSCG00000016263	2.86879	6.81914	20.7161	0.000120994	0.00440378	3	4	Up-regulated
Sus_scrofa___APEX1	4.54985	2.0339	19.068	0.000121871	0.00442753	3	4	Up-regulated
Sus_scrofa___SLC25A12	2.1111	5.81483	20.7001	0.000122211	0.00443171	3	4	Up-regulated
Sus_scrofa___DCTPP1	2.08061	4.32324	20.464	0.000124223	0.0044718	3	4	Up-regulated
Sus_scrofa___UBQLN1	1.16704	6.68016	20.6023	0.000124858	0.00448646	3	4	Up-regulated
Sus_scrofa___HRH1	3.24319	6.34737	20.4875	0.000128787	0.00457764	3	4	Up-regulated
Sus_scrofa___SNX18	3.15355	5.28921	20.2742	0.00013015	0.00460412	3	4	Up-regulated
Sus_scrofa___EFL1	1.1987	6.75645	20.4485	0.000130466	0.00460412	3	4	Up-regulated
Sus_scrofa___ENSSSCG00000021155	3.41945	2.34003	18.6829	0.000136041	0.0047583	3	4	Up-regulated
Sus_scrofa___ACO1	2.02174	5.76893	20.2939	0.000136997	0.00477479	3	4	Up-regulated
Sus_scrofa___TMCC1	0.992019	9.08612	20.2295	0.000138726	0.00480114	3	4	Up-regulated
Sus_scrofa___ZNFX1	2.41134	6.94742	20.2027	0.000140069	0.00482225	3	4	Up-regulated
Sus_scrofa___NFKBIZ	2.31756	8.29971	20.1469	0.000142122	0.00488438	3	4	Up-regulated
Sus_scrofa___PRKAR2A	1.39277	7.69002	20.1192	0.000143251	0.00490609	3	4	Up-regulated
Sus_scrofa___ENSSSCG00000038187	2.36758	6.76454	20.1051	0.000144014	0.00492367	3	4	Up-regulated
Sus_scrofa___RASL11B	3.79188	3.89674	19.126	0.000148086	0.00504284	3	4	Up-regulated
Sus_scrofa___TXNDC11	1.25376	7.0625	19.9721	0.000149579	0.00507002	3	4	Up-regulated
Sus_scrofa___SUCLG2	1.20696	7.76671	19.9246	0.000151508	0.00510907	3	4	Up-regulated
Sus_scrofa___DTD2	2.35378	3.73038	19.4383	0.000152056	0.00511877	3	4	Up-regulated
Sus_scrofa___HNRNPC	1.26842	7.12878	19.8338	0.000155618	0.00519004	3	4	Up-regulated
Sus_scrofa___DCDC1	1.79087	4.44048	19.7633	0.000155717	0.00519004	3	4	Up-regulated
Sus_scrofa___ATP5MC2	3.08292	3.4909	19.0209	0.000155751	0.00519004	3	4	Up-regulated
Sus_scrofa___ENSSSCG00000002430	1.37346	6.62954	19.8029	0.000157183	0.00522892	3	4	Up-regulated
Sus_scrofa___ELL2	3.68563	6.09974	19.5062	0.000160937	0.00532832	3	4	Up-regulated
Sus_scrofa___HK1	1.66156	7.57328	19.7168	0.000161082	0.00532832	3	4	Up-regulated
Sus_scrofa___MX1	4.15195	7.72767	19.7223	0.000161237	0.00532832	3	4	Up-regulated
Sus_scrofa___ISG12(A)	4.68957	6.85363	19.6774	0.000162763	0.0053493	3	4	Up-regulated
Sus_scrofa___HIRA	1.19256	6.08908	19.6883	0.000162867	0.0053493	3	4	Up-regulated
Sus_scrofa___ERH	2.07683	4.00844	19.4122	0.000162971	0.0053493	3	4	Up-regulated
Sus_scrofa___CHSY3	1.66788	9.40409	19.6498	0.00016406	0.00537611	3	4	Up-regulated
Sus_scrofa___ERP29	2.06721	4.48047	19.5681	0.000164885	0.00539418	3	4	Up-regulated
Sus_scrofa___BZW2	3.24697	4.55237	19.1123	0.000166261	0.00542148	3	4	Up-regulated
Sus_scrofa___SLC41A2	1.78054	6.80285	19.5855	0.000167575	0.00545505	3	4	Up-regulated
Sus_scrofa___ABHD17C	1.7968	4.89983	19.5512	0.000169412	0.00549668	3	4	Up-regulated
Sus_scrofa___ADAMTS4	5.56026	4.29891	18.9815	0.000171965	0.00554306	3	4	Up-regulated
Sus_scrofa___BHLHE40	3.82787	5.28512	18.9475	0.000173443	0.00558159	3	4	Up-regulated
Sus_scrofa___NR4A2	3.9308	4.78427	19.1921	0.000174475	0.00558225	3	4	Up-regulated
Sus_scrofa___S1PR2	2.82178	4.47846	19.2873	0.000175301	0.00559573	3	4	Up-regulated
Sus_scrofa___PGGT1B	1.14239	6.26676	19.4078	0.00017652	0.00561648	3	4	Up-regulated
Sus_scrofa___MIPOL1	1.27539	7.22509	19.357	0.000178849	0.00567227	3	4	Up-regulated
Sus_scrofa___CHORDC1	1.23673	6.32468	19.3271	0.000180677	0.00571828	3	4	Up-regulated
Sus_scrofa___HSPA4	1.31765	6.61509	19.2386	0.000185486	0.00582469	3	4	Up-regulated
Sus_scrofa___BCL3	2.80967	4.54194	18.6976	0.000188033	0.00586717	3	4	Up-regulated
Sus_scrofa___USP18	3.45682	6.68776	19.197	0.000188266	0.00586717	3	4	Up-regulated
Sus_scrofa___TPM4	1.98936	6.88466	19.1714	0.000189168	0.00588598	3	4	Up-regulated
Sus_scrofa___CMPK2	4.31621	5.5635	18.9191	0.000189554	0.00588872	3	4	Up-regulated
Sus_scrofa___ZBTB43	2.39231	4.02525	18.8844	0.000190556	0.00590127	3	4	Up-regulated
Sus_scrofa___ENSSSCG00000048446	6.11093	1.5117	17.7829	0.000191986	0.00593622	3	4	Up-regulated
Sus_scrofa___PPP2CA	2.73024	4.63449	19.0231	0.000192335	0.00593769	3	4	Up-regulated
Sus_scrofa___RAB5A	0.98993	6.75304	19.0877	0.000193668	0.00596952	3	4	Up-regulated
Sus_scrofa___WIPI1	1.32441	6.76677	19.0662	0.000194938	0.00599928	3	4	Up-regulated
Sus_scrofa___SERTAD1	4.79375	2.81226	18.2413	0.000199633	0.00609623	3	4	Up-regulated
Sus_scrofa___MX2	4.95782	8.09768	18.9851	0.000200282	0.00610659	3	4	Up-regulated
Sus_scrofa___IGFBP2	3.48475	5.04021	18.6581	0.000203335	0.00615706	3	4	Up-regulated
Sus_scrofa___GPR158	2.69451	3.81672	18.3324	0.000203519	0.00615706	3	4	Up-regulated
Sus_scrofa___USP5	1.70071	4.54899	18.8878	0.000203984	0.00615706	3	4	Up-regulated
Sus_scrofa___CANX	1.30822	6.74304	18.8531	0.000207736	0.00621852	3	4	Up-regulated
Sus_scrofa___PPWD1	1.36665	5.07134	18.868	0.000208146	0.00621863	3	4	Up-regulated
Sus_scrofa___ENSSSCG00000037274	1.46888	7.16385	18.8401	0.00020837	0.00621863	3	4	Up-regulated
Sus_scrofa___BTF3L4	1.48009	5.96187	18.8444	0.00020881	0.00622236	3	4	Up-regulated
Sus_scrofa___CCDC126	2.0321	5.2021	18.8461	0.000209256	0.00622624	3	4	Up-regulated
Sus_scrofa___TRAK2	2.59392	4.98659	18.6412	0.000213725	0.00632108	3	4	Up-regulated
Sus_scrofa___MYNN	0.986028	5.53421	18.7345	0.000216065	0.00635219	3	4	Up-regulated
Sus_scrofa___SMIM8	4.01418	3.14857	17.9275	0.000221242	0.00646585	3	4	Up-regulated
Sus_scrofa___CS	2.31222	4.89546	18.4546	0.000225461	0.00656967	3	4	Up-regulated
Sus_scrofa___NDUFS1	1.5581	5.70756	18.5741	0.000226719	0.00659659	3	4	Up-regulated
Sus_scrofa___ADAMTS6	3.08048	7.57469	18.5657	0.000227084	0.00659747	3	4	Up-regulated
Sus_scrofa___SOD2	2.84787	6.14167	18.5336	0.000228488	0.0066285	3	4	Up-regulated
Sus_scrofa___PPP1R3B	6.04643	1.77018	17.4685	0.000229688	0.00665036	3	4	Up-regulated
Sus_scrofa___GSTO1	2.44594	3.22249	17.8577	0.000229915	0.00665036	3	4	Up-regulated
Sus_scrofa___TMEM168	1.56081	6.34837	18.4742	0.000232832	0.00670522	3	4	Up-regulated
Sus_scrofa___ENSSSCG00000039004	2.31831	3.53644	18.1441	0.000233722	0.00671619	3	4	Up-regulated
Sus_scrofa___ENSSSCG00000032146	3.41714	2.51102	17.4677	0.000233894	0.00671619	3	4	Up-regulated
Sus_scrofa___RDH14	3.22655	3.39752	17.7316	0.000234364	0.00671991	3	4	Up-regulated
Sus_scrofa___NR6A1	1.24683	7.07017	18.4386	0.000234928	0.00672632	3	4	Up-regulated
Sus_scrofa___MAP3K20	0.95064	8.85407	18.4064	0.000237049	0.0067772	3	4	Up-regulated
Sus_scrofa___THAP9	3.59241	3.65232	17.6953	0.000238286	0.0068027	3	4	Up-regulated
Sus_scrofa___HSP90B1	1.92751	6.31583	18.3634	0.000241082	0.00684976	3	4	Up-regulated
Sus_scrofa___LPGAT1	1.4677	6.25593	18.359	0.000241323	0.00684976	3	4	Up-regulated
Sus_scrofa___TP53	2.02215	4.71784	18.3025	0.000243055	0.00688901	3	4	Up-regulated
Sus_scrofa___BPNT1	1.71581	4.53791	18.2944	0.000243439	0.00688999	3	4	Up-regulated
Sus_scrofa___THSD4	3.10952	8.42422	18.3072	0.000244325	0.00690224	3	4	Up-regulated
Sus_scrofa___MAGI1	1.74796	9.68705	18.2575	0.000247908	0.00695658	3	4	Up-regulated
Sus_scrofa___TYW3	2.46763	3.43075	17.6241	0.000248814	0.0069721	3	4	Up-regulated
Sus_scrofa___ARMCX3	2.31964	4.15666	18.0777	0.000249402	0.00697867	3	4	Up-regulated
Sus_scrofa___FAM111A	1.68928	5.80633	18.2492	0.000249878	0.00698208	3	4	Up-regulated
Sus_scrofa___CARMIL1	1.32052	8.76179	18.2198	0.00025076	0.00698694	3	4	Up-regulated
Sus_scrofa___ENSSSCG00000034715	3.14436	3.26347	17.5126	0.000252569	0.0070175	3	4	Up-regulated
Sus_scrofa___ICAM2	1.35097	6.28283	18.1244	0.000258722	0.00715032	3	4	Up-regulated
Sus_scrofa___MBNL3	1.63573	6.18479	18.1241	0.000259005	0.00715032	3	4	Up-regulated
Sus_scrofa___WNK3	2.90339	3.20868	17.4019	0.00026149	0.00718268	3	4	Up-regulated
Sus_scrofa___ADAMTS3	4.62165	6.76151	17.9999	0.000261724	0.00718268	3	4	Up-regulated
Sus_scrofa___NBAS	1.21422	7.72941	18.0783	0.000261791	0.00718268	3	4	Up-regulated
Sus_scrofa___SCOC	3.36364	2.9642	17.3288	0.000264625	0.00723028	3	4	Up-regulated
Sus_scrofa___CEBPB	2.10703	5.40773	18.0279	0.000266936	0.00727326	3	4	Up-regulated
Sus_scrofa___DPP3	1.70875	4.88492	17.9998	0.000268139	0.00729596	3	4	Up-regulated
Sus_scrofa___SLC35B4	3.06687	3.7097	17.0502	0.000271915	0.0073745	3	4	Up-regulated
Sus_scrofa___MAPK6	1.51325	5.69482	17.9677	0.000272146	0.0073745	3	4	Up-regulated
Sus_scrofa___LARS2	1.22872	5.93219	17.9556	0.000272582	0.00737616	3	4	Up-regulated
Sus_scrofa___CDKN1A	3.26621	3.65367	17.3919	0.000273545	0.00738198	3	4	Up-regulated
Sus_scrofa___DNAJC16	1.30455	5.57525	17.9363	0.000274675	0.00739223	3	4	Up-regulated
Sus_scrofa___MRPL15	2.70019	3.69958	17.1982	0.00028298	0.00756415	3	4	Up-regulated
Sus_scrofa___GSS	2.09353	3.586	17.4992	0.00028468	0.00758808	3	4	Up-regulated
Sus_scrofa___C1orf198	4.73233	5.4851	17.138	0.00028476	0.00758808	3	4	Up-regulated
Sus_scrofa___ENSSSCG00000006395	1.45148	5.21948	17.825	0.000285241	0.00758808	3	4	Up-regulated
Sus_scrofa___ENSSSCG00000013715	1.32795	5.31874	17.7411	0.00029195	0.00771566	3	4	Up-regulated
Sus_scrofa___SYPL2	1.93247	4.2555	17.6725	0.000292168	0.00771566	3	4	Up-regulated
Sus_scrofa___ENSSSCG00000011676	2.08299	5.86886	17.6949	0.000295278	0.00775988	3	4	Up-regulated
Sus_scrofa___TMEM266	3.1316	1.92004	15.6369	0.000295459	0.00775988	3	4	Up-regulated
Sus_scrofa___AKR1D1	1.75708	5.39474	17.6805	0.000296421	0.00776555	3	4	Up-regulated
Sus_scrofa___YBEY	2.98578	2.35117	16.6409	0.000299627	0.00780811	3	4	Up-regulated
Sus_scrofa___NAA50	1.60813	6.1189	17.6199	0.000302099	0.0078478	3	4	Up-regulated
Sus_scrofa___NUDT12	4.86945	2.83939	17.2487	0.000302531	0.0078478	3	4	Up-regulated
Sus_scrofa___SLC7A1	2.83721	4.82533	17.2643	0.000314302	0.0080822	3	4	Up-regulated
Sus_scrofa___KCNK12	7.59097	3.55914	16.9502	0.000314651	0.0080822	3	4	Up-regulated
Sus_scrofa___HK2	6.84123	6.2667	17.1233	0.00031605	0.0081016	3	4	Up-regulated
Sus_scrofa___WDR37	1.48341	6.4411	17.4521	0.000317754	0.00811393	3	4	Up-regulated
Sus_scrofa___ZCCHC7	0.948844	8.86847	17.4246	0.000319605	0.00812995	3	4	Up-regulated
Sus_scrofa___USP25	1.05267	8.46633	17.4177	0.000320298	0.00812995	3	4	Up-regulated
Sus_scrofa___HLCS	1.04143	7.15384	17.4169	0.00032051	0.00812995	3	4	Up-regulated
Sus_scrofa___UQCRC2	1.72466	5.47603	17.4369	0.000320632	0.00812995	3	4	Up-regulated
Sus_scrofa___OGDH	1.93216	6.2754	17.4189	0.00032173	0.00814732	3	4	Up-regulated
Sus_scrofa___PTCD2	2.03043	4.40406	17.3454	0.000323118	0.00815057	3	4	Up-regulated
Sus_scrofa___GOLGA4	2.19348	6.05658	17.4028	0.000323416	0.00815057	3	4	Up-regulated
Sus_scrofa___ENSSSCG00000029347	2.45595	3.74149	16.9976	0.000324614	0.00816058	3	4	Up-regulated
Sus_scrofa___MMS19	1.75386	5.16436	17.3812	0.000325718	0.00816278	3	4	Up-regulated
Sus_scrofa___EPSTI1	3.66534	7.58663	17.3689	0.000325974	0.00816278	3	4	Up-regulated
Sus_scrofa___POLR3B	2.53435	4.84779	17.2443	0.000327642	0.00819188	3	4	Up-regulated
Sus_scrofa___TEAD4	2.12027	5.64338	17.3209	0.000328661	0.00820695	3	4	Up-regulated
Sus_scrofa___KLF10	1.95036	5.30598	17.3191	0.000331435	0.00826576	3	4	Up-regulated
Sus_scrofa___CPEB2	2.20849	6.36852	17.2927	0.000333595	0.0082882	3	4	Up-regulated
Sus_scrofa___ENSSSCG00000032591	3.48959	4.56061	17.0402	0.000336895	0.00835965	3	4	Up-regulated
Sus_scrofa___USP9X	1.07255	8.11611	17.2339	0.000339034	0.00840043	3	4	Up-regulated
Sus_scrofa___IFTAP	1.97179	4.36441	17.1875	0.000340018	0.00840543	3	4	Up-regulated
Sus_scrofa___PTP4A1	2.30404	3.6539	16.948	0.000341007	0.00841933	3	4	Up-regulated
Sus_scrofa___RPL3	1.7079	5.81586	17.2108	0.000343141	0.00843441	3	4	Up-regulated
Sus_scrofa___TMEM45A	1.42966	7.15713	17.1618	0.000346857	0.00846839	3	4	Up-regulated
Sus_scrofa___POP1	2.04019	4.61741	17.003	0.000348973	0.00849901	3	4	Up-regulated
Sus_scrofa___PIM3	3.60226	4.99978	16.6198	0.000349999	0.00850298	3	4	Up-regulated
Sus_scrofa___PNPT1	1.51616	6.26469	17.1236	0.000351869	0.00852842	3	4	Up-regulated
Sus_scrofa___NUDT21	1.01964	5.86175	17.116	0.000352768	0.00852842	3	4	Up-regulated
Sus_scrofa___HSPA14	1.56766	4.86464	17.1229	0.000353151	0.00852842	3	4	Up-regulated
Sus_scrofa___IDH3A	3.18391	3.52268	16.4632	0.000353619	0.00852842	3	4	Up-regulated
Sus_scrofa___ENSSSCG00000016646	2.65537	5.48157	17.0704	0.00035397	0.00852842	3	4	Up-regulated
Sus_scrofa___EIF2AK2	2.72576	8.38026	17.0944	0.000354072	0.00852842	3	4	Up-regulated
Sus_scrofa___PML	2.23475	7.18779	17.0612	0.000357997	0.00858929	3	4	Up-regulated
Sus_scrofa___RAI14	2.03664	9.28611	17.032	0.000360961	0.00861538	3	4	Up-regulated
Sus_scrofa___HERC5	3.77714	7.24835	17.0375	0.000361615	0.00861538	3	4	Up-regulated
Sus_scrofa___ECD	1.51017	5.19044	17.0335	0.000362049	0.00861538	3	4	Up-regulated
Sus_scrofa___IFIT1	2.92684	6.38955	17.0234	0.000363548	0.00863023	3	4	Up-regulated
Sus_scrofa___NIFK	1.43446	5.43779	17.0141	0.000365077	0.00865609	3	4	Up-regulated
Sus_scrofa___ENSSSCG00000034286	5.36759	1.12373	15.3133	0.000371208	0.00872747	3	4	Up-regulated
Sus_scrofa___PPA1	2.29288	5.63144	16.9615	0.000371298	0.00872747	3	4	Up-regulated
Sus_scrofa___STAT1	2.18526	8.28007	16.927	0.000373013	0.00873922	3	4	Up-regulated
Sus_scrofa___FJX1	2.89001	3.31603	16.3741	0.000374286	0.00875644	3	4	Up-regulated
Sus_scrofa___ENSSSCG00000003984	2.86799	3.7313	16.3276	0.000377228	0.0087962	3	4	Up-regulated
Sus_scrofa___NT5DC1	1.36706	6.58564	16.8895	0.000378187	0.00880655	3	4	Up-regulated
Sus_scrofa___EXTL3	2.37188	4.74424	16.8132	0.000379632	0.0088154	3	4	Up-regulated
Sus_scrofa___PPP1R14B	2.64637	3.42556	16.2676	0.000381986	0.00885481	3	4	Up-regulated
Sus_scrofa___CEP70	2.35782	3.97866	16.6558	0.000388338	0.00896876	3	4	Up-regulated
Sus_scrofa___AFG1L	1.32382	6.2676	16.7954	0.000389429	0.00896876	3	4	Up-regulated
Sus_scrofa___TMEM150C	1.25903	8.26147	16.7875	0.00038963	0.00896876	3	4	Up-regulated
Sus_scrofa___SLC10A7	1.11716	7.49281	16.7516	0.000394127	0.0090617	3	4	Up-regulated
Sus_scrofa___AVIL	3.29443	3.98146	16.1652	0.000396461	0.00910475	3	4	Up-regulated
Sus_scrofa___AIFM1	2.63355	4.55437	16.597	0.000398449	0.00912687	3	4	Up-regulated
Sus_scrofa___EMP1	1.56303	7.71415	16.6648	0.000404997	0.00923737	3	4	Up-regulated
Sus_scrofa___ALKBH2	5.83898	1.90736	16.1	0.000406129	0.0092514	3	4	Up-regulated
Sus_scrofa___TMEM161A	3.34876	2.86096	15.7224	0.000408788	0.00928823	3	4	Up-regulated
Sus_scrofa___PSMC6	0.963474	7.29333	16.6326	0.000409159	0.00928823	3	4	Up-regulated
Sus_scrofa___MRTO4	1.69283	4.94014	16.6128	0.000410176	0.00929241	3	4	Up-regulated
Sus_scrofa___CCN4	4.38318	5.70101	16.4639	0.000410285	0.00929241	3	4	Up-regulated
Sus_scrofa___PLAA	1.18058	6.43457	16.6068	0.000412993	0.00934004	3	4	Up-regulated
Sus_scrofa___MEMO1	1.27889	7.42873	16.6005	0.000413335	0.00934004	3	4	Up-regulated
Sus_scrofa___PFDN2	1.52298	4.95542	16.5912	0.000416652	0.00939349	3	4	Up-regulated
Sus_scrofa___SERPINE1	4.73108	8.78303	16.5071	0.000421324	0.00948797	3	4	Up-regulated
Sus_scrofa___CDK2AP1	3.08842	3.23344	15.9381	0.000422059	0.00949125	3	4	Up-regulated
Sus_scrofa___TTC12	3.31996	3.1389	15.9013	0.000422432	0.00949125	3	4	Up-regulated
Sus_scrofa___SCMH1	1.44864	8.16516	16.5156	0.000424461	0.00951517	3	4	Up-regulated
Sus_scrofa___ENSSSCG00000032436	4.50756	5.46413	16.3649	0.000426842	0.00954188	3	4	Up-regulated
Sus_scrofa___LIX1	4.18138	2.32453	15.2141	0.000426909	0.00954188	3	4	Up-regulated
Sus_scrofa___MIGA1	1.03381	6.82936	16.4975	0.000427117	0.00954188	3	4	Up-regulated
Sus_scrofa___ENSSSCG00000014997	1.5358	6.85809	16.4813	0.000429403	0.00957157	3	4	Up-regulated
Sus_scrofa___TMED5	1.88576	5.34623	16.4652	0.000433257	0.00962485	3	4	Up-regulated
Sus_scrofa___METTL16	1.25193	6.43907	16.4468	0.00043469	0.00964582	3	4	Up-regulated
Sus_scrofa___RNF7	2.69625	4.75937	16.3004	0.000436235	0.00966921	3	4	Up-regulated
Sus_scrofa___SEC22B	1.13598	6.22039	16.4188	0.00043857	0.00971007	3	4	Up-regulated
Sus_scrofa___ETV4	2.47325	4.81106	16.4032	0.000441086	0.0097439	3	4	Up-regulated
Sus_scrofa___UBE3D	1.64295	6.17323	16.3948	0.000442632	0.0097562	3	4	Up-regulated
Sus_scrofa___SMARCD3	2.16447	4.91937	16.2861	0.000447121	0.00984415	3	4	Up-regulated
Sus_scrofa___CFAP100	3.6488	2.92496	15.2014	0.000449293	0.00986994	3	4	Up-regulated
Sus_scrofa___C6orf163	4.1566	2.95846	15.7602	0.000450886	0.00989392	3	4	Up-regulated
Sus_scrofa___ZNF404	2.28886	3.63774	15.9713	0.00045184	0.00990383	3	4	Up-regulated
Sus_scrofa___GPX8	2.2878	4.5594	16.212	0.000465134	0.010084	3	4	Up-regulated
Sus_scrofa___VDR	3.32053	5.71349	16.1293	0.000465173	0.010084	3	4	Up-regulated
Sus_scrofa___BCAR1	1.76732	4.7817	16.2302	0.000466329	0.0100869	3	4	Up-regulated
Sus_scrofa___PDIA3	0.914591	6.71913	16.1945	0.000470332	0.0101624	3	4	Up-regulated
Sus_scrofa___MORN2	3.26688	1.86064	14.7247	0.000471809	0.0101831	3	4	Up-regulated
Sus_scrofa___SACS	1.96956	4.04611	16.0029	0.000472374	0.0101842	3	4	Up-regulated
Sus_scrofa___SDHD	4.52716	3.37021	15.756	0.000474758	0.0101989	3	4	Up-regulated
Sus_scrofa___DNAJC15	1.21167	5.53455	16.1766	0.000475047	0.0101989	3	4	Up-regulated
Sus_scrofa___CPM	2.21222	8.05949	16.1612	0.000475124	0.0101989	3	4	Up-regulated
Sus_scrofa___KDELR2	1.08759	6.3141	16.1264	0.000481132	0.0103166	3	4	Up-regulated
Sus_scrofa___PRR16	4.07833	7.20752	16.1171	0.000483324	0.0103411	3	4	Up-regulated
Sus_scrofa___ENSSSCG00000031912	4.07244	5.24979	15.979	0.000485083	0.0103675	3	4	Up-regulated
Sus_scrofa___ENSSSCG00000004441	1.44756	7.29513	16.0832	0.000487105	0.0103995	3	4	Up-regulated
Sus_scrofa___PTN	2.6648	5.33686	16.0994	0.000489919	0.0104483	3	4	Up-regulated
Sus_scrofa___HMGN3	1.72177	5.19258	16.0624	0.000493211	0.0104958	3	4	Up-regulated
Sus_scrofa___BST2	3.96608	5.88144	16.0314	0.000494434	0.0105015	3	4	Up-regulated
Sus_scrofa___THOC7	1.48201	5.54253	16.043	0.000495609	0.0105015	3	4	Up-regulated
Sus_scrofa___SLC16A1	3.1981	5.06769	15.8074	0.000496213	0.010503	3	4	Up-regulated
Sus_scrofa___DNAJB9	1.96835	3.96941	15.8204	0.000498095	0.0105315	3	4	Up-regulated
Sus_scrofa___TMEM98	3.07035	3.22241	15.4716	0.000499477	0.0105494	3	4	Up-regulated
Sus_scrofa___FBXO42	1.13858	7.29096	15.9371	0.0005104	0.0107288	3	4	Up-regulated
Sus_scrofa___ABL2	1.05114	7.2876	15.9353	0.000510689	0.0107288	3	4	Up-regulated
Sus_scrofa___TMEM132A	2.58486	3.4637	15.4111	0.000511292	0.0107301	3	4	Up-regulated
Sus_scrofa___COX5A	2.07239	4.47498	15.8966	0.00051184	0.0107301	3	4	Up-regulated
Sus_scrofa___SOD3	3.79449	4.20522	15.5263	0.000514456	0.0107735	3	4	Up-regulated
Sus_scrofa___CSKMT	5.80887	2.60608	16.3362	0.00051538	0.0107769	3	4	Up-regulated
Sus_scrofa___OSBPL11	1.58251	6.14559	15.913	0.00051593	0.0107769	3	4	Up-regulated
Sus_scrofa___SCFD2	1.03109	8.87018	15.8938	0.000517346	0.0107769	3	4	Up-regulated
Sus_scrofa___SLC35D1	2.64062	4.36388	15.6867	0.000523504	0.0108707	3	4	Up-regulated
Sus_scrofa___PPRC1	1.44188	5.32107	15.8647	0.000524636	0.0108827	3	4	Up-regulated
Sus_scrofa___RAB18	1.2292	6.65661	15.8446	0.000526134	0.0108853	3	4	Up-regulated
Sus_scrofa___SRSF10	1.25538	7.47935	15.8385	0.000526786	0.0108853	3	4	Up-regulated
Sus_scrofa___NRBF2	1.20336	5.49736	15.8534	0.000526964	0.0108853	3	4	Up-regulated
Sus_scrofa___TMEM120B	2.87448	4.40412	15.6146	0.000537103	0.0110599	3	4	Up-regulated
Sus_scrofa___DLG3	3.91181	1.57506	14.9595	0.000544753	0.0111708	3	4	Up-regulated
Sus_scrofa___SDHC	2.67274	4.49716	15.6481	0.000545982	0.0111844	3	4	Up-regulated
Sus_scrofa___PPIB	2.31685	5.00255	15.7124	0.000548244	0.0112049	3	4	Up-regulated
Sus_scrofa___KCNQ5	3.05466	9.62527	15.7114	0.000548688	0.0112049	3	4	Up-regulated
Sus_scrofa___TMEM243	2.24107	4.52216	15.6431	0.000549298	0.0112058	3	4	Up-regulated
Sus_scrofa___TMPPE	2.81687	3.16014	15.0948	0.000550309	0.0112148	3	4	Up-regulated
Sus_scrofa___METTL15	1.48562	6.00198	15.6988	0.000552357	0.0112348	3	4	Up-regulated
Sus_scrofa___ENSSSCG00000034570	5.40254	7.82016	15.7008	0.000553102	0.0112369	3	4	Up-regulated
Sus_scrofa___CERS4	2.09924	5.75527	15.6885	0.000553988	0.0112433	3	4	Up-regulated
Sus_scrofa___PIM1	2.83832	4.45825	15.5047	0.000557658	0.0112946	3	4	Up-regulated
Sus_scrofa___GNAO1	3.07077	3.43903	14.6497	0.000559534	0.0113184	3	4	Up-regulated
Sus_scrofa___DPY19L2	5.57054	1.6094	14.7655	0.000563649	0.0113692	3	4	Up-regulated
Sus_scrofa___UTP18	1.64545	4.99512	15.608	0.000566876	0.0114226	3	4	Up-regulated
Sus_scrofa___ZNF784	3.45687	2.96218	15.0893	0.000569228	0.0114476	3	4	Up-regulated
Sus_scrofa___IL1R1	1.48563	9.14958	15.585	0.000571546	0.0114699	3	4	Up-regulated
Sus_scrofa___ITGA5	2.02585	6.87527	15.5544	0.000578667	0.0115892	3	4	Up-regulated
Sus_scrofa___UHRF1BP1	1.75216	5.51033	15.5563	0.000579788	0.0115999	3	4	Up-regulated
Sus_scrofa___DAPK3	3.95147	4.54366	15.0826	0.000582649	0.0116453	3	4	Up-regulated
Sus_scrofa___DSCAM	2.057	3.51303	15.2117	0.000584715	0.0116748	3	4	Up-regulated
Sus_scrofa___ASB1	1.54806	4.42972	15.493	0.000589016	0.011701	3	4	Up-regulated
Sus_scrofa___RPL28	2.41452	6.01926	15.4997	0.000589821	0.011701	3	4	Up-regulated
Sus_scrofa___B3GALNT2	1.84144	5.16222	15.502	0.000590183	0.011701	3	4	Up-regulated
Sus_scrofa___ENSSSCG00000009293	1.78537	7.43206	15.4074	0.000605939	0.0119414	3	4	Up-regulated
Sus_scrofa___EIF3F	1.70695	5.16974	15.4105	0.000609383	0.0119853	3	4	Up-regulated
Sus_scrofa___TRAP1	1.18746	5.3572	15.3973	0.000610693	0.0119883	3	4	Up-regulated
Sus_scrofa___CCT3	1.26207	5.57	15.3819	0.000613312	0.0120266	3	4	Up-regulated
Sus_scrofa___ENSSSCG00000002709	2.72687	4.01603	15.1052	0.000613945	0.0120271	3	4	Up-regulated
Sus_scrofa___SDCBP	1.25812	6.68344	15.3575	0.000615917	0.0120418	3	4	Up-regulated
Sus_scrofa___ENSSSCG00000007203	1.01197	7.17106	15.3484	0.000617466	0.0120601	3	4	Up-regulated
Sus_scrofa___SLC25A13	1.2301	7.09235	15.3339	0.000620461	0.0120704	3	4	Up-regulated
Sus_scrofa___CHP1	1.73302	5.46295	15.3385	0.000620882	0.0120704	3	4	Up-regulated
Sus_scrofa___SLC38A11	4.63417	2.02154	14.1761	0.000621079	0.0120704	3	4	Up-regulated
Sus_scrofa___ATP8A2	2.62563	4.01496	15.213	0.000622829	0.0120704	3	4	Up-regulated
Sus_scrofa___TBC1D22B	1.99942	5.35477	15.3031	0.000629818	0.0121808	3	4	Up-regulated
Sus_scrofa___IL17RA	1.38879	5.05602	15.2743	0.000635833	0.0122675	3	4	Up-regulated
Sus_scrofa___PLEKHA6	3.19345	6.32401	15.2484	0.000636218	0.0122675	3	4	Up-regulated
Sus_scrofa___TYMS	2.54322	3.44465	14.9561	0.000636789	0.0122675	3	4	Up-regulated
Sus_scrofa___GABRG3	3.61171	2.43565	14.7379	0.000643326	0.0123693	3	4	Up-regulated
Sus_scrofa___ENSSSCG00000010893	1.20746	8.67506	15.1893	0.000650158	0.0124836	3	4	Up-regulated
Sus_scrofa___TCAIM	1.48069	5.17962	15.2077	0.000650537	0.0124836	3	4	Up-regulated
Sus_scrofa___CFL1	1.76866	3.87984	15.1578	0.000652927	0.0125136	3	4	Up-regulated
Sus_scrofa___SINHCAF	1.2326	5.56102	15.1887	0.000653371	0.0125136	3	4	Up-regulated
Sus_scrofa___CHPT1	2.98537	4.28998	14.9012	0.000656637	0.012564	3	4	Up-regulated
Sus_scrofa___FHIT	1.69906	7.04687	15.1436	0.000660347	0.0126227	3	4	Up-regulated
Sus_scrofa___GABRA2	3.50966	3.30105	13.895	0.000665047	0.012656	3	4	Up-regulated
Sus_scrofa___HAO2	1.60044	5.51954	15.103	0.000671622	0.0127518	3	4	Up-regulated
Sus_scrofa___SHISA5	1.35067	6.12824	15.0894	0.000673235	0.0127603	3	4	Up-regulated
Sus_scrofa___DCUN1D3	1.30774	6.70747	15.0847	0.000673366	0.0127603	3	4	Up-regulated
Sus_scrofa___ACSL5	1.20457	6.28278	15.0737	0.000676391	0.0127931	3	4	Up-regulated
Sus_scrofa___ENSSSCG00000014250	6.64155	1.81362	14.1394	0.000677806	0.0128076	3	4	Up-regulated
Sus_scrofa___TOB2	3.72572	4.38864	14.6004	0.000690487	0.0129593	3	4	Up-regulated
Sus_scrofa___PRDX4	1.57417	4.88787	14.9849	0.000699371	0.0130216	3	4	Up-regulated
Sus_scrofa___YAP1	1.62606	8.39924	14.9669	0.000699551	0.0130216	3	4	Up-regulated
Sus_scrofa___OTUD7B	0.978379	6.63817	14.9658	0.000700352	0.0130216	3	4	Up-regulated
Sus_scrofa___RAB3GAP1	1.90094	5.81751	14.9675	0.000702643	0.0130506	3	4	Up-regulated
Sus_scrofa___RRS1	2.98562	2.42835	14.1788	0.00071306	0.0131933	3	4	Up-regulated
Sus_scrofa___HDHD2	1.31023	4.90217	14.93	0.000713604	0.0131933	3	4	Up-regulated
Sus_scrofa___OSMR	1.15117	7.68609	14.8375	0.000730214	0.0134249	3	4	Up-regulated
Sus_scrofa___PARP9	2.30478	4.74098	14.8397	0.000731647	0.0134287	3	4	Up-regulated
Sus_scrofa___PYCR3	3.82179	2.4638	14.1517	0.000732246	0.0134287	3	4	Up-regulated
Sus_scrofa___CADPS2	1.30609	7.49546	14.8278	0.000732464	0.0134287	3	4	Up-regulated
Sus_scrofa___DDX24	1.22727	5.89855	14.815	0.000737182	0.0135027	3	4	Up-regulated
Sus_scrofa___CHODL	1.70657	5.7379	14.8155	0.000738127	0.0135074	3	4	Up-regulated
Sus_scrofa___ABCC3	1.83317	4.04552	14.7589	0.000741931	0.013536	3	4	Up-regulated
Sus_scrofa___RPF2	1.42579	5.8685	14.7979	0.000742545	0.013536	3	4	Up-regulated
Sus_scrofa___WFS1	3.05879	3.06939	14.1833	0.000743119	0.013536	3	4	Up-regulated
Sus_scrofa___MTERF1	1.44438	4.6992	14.6923	0.000767746	0.0139331	3	4	Up-regulated
Sus_scrofa___TRIM44	0.972775	7.65729	14.6701	0.00077177	0.0139842	3	4	Up-regulated
Sus_scrofa___FAM13A	1.1955	9.15941	14.667	0.00077244	0.0139842	3	4	Up-regulated
Sus_scrofa___ASIC2	2.44741	4.77194	14.5187	0.000783964	0.0141364	3	4	Up-regulated
Sus_scrofa___ABHD5	2.89088	4.76164	14.553	0.000788021	0.0141966	3	4	Up-regulated
Sus_scrofa___RSBN1	1.66419	6.01809	14.596	0.000793475	0.0142385	3	4	Up-regulated
Sus_scrofa___CAVIN3	2.04529	4.34983	14.5322	0.000797883	0.0142624	3	4	Up-regulated
Sus_scrofa___INTU	1.56984	4.30923	14.5606	0.000798399	0.0142624	3	4	Up-regulated
Sus_scrofa___ACOT11	3.82641	4.19558	14.363	0.000798781	0.0142624	3	4	Up-regulated
Sus_scrofa___KHDRBS3	4.04083	4.69535	14.1627	0.000800554	0.0142743	3	4	Up-regulated
Sus_scrofa___TRIT1	0.933491	6.83439	14.5598	0.000801014	0.0142743	3	4	Up-regulated
Sus_scrofa___TP63	4.55439	3.04257	13.568	0.000811621	0.0144502	3	4	Up-regulated
Sus_scrofa___EIF3I	1.4051	4.45518	14.4808	0.000814886	0.0144826	3	4	Up-regulated
Sus_scrofa___EGLN3	4.99197	4.34854	14.1574	0.000814908	0.0144826	3	4	Up-regulated
Sus_scrofa___NT5DC2	4.46501	2.77703	14.4004	0.000827164	0.0146476	3	4	Up-regulated
Sus_scrofa___PPP4R2	1.02245	7.05507	14.4534	0.000829821	0.0146684	3	4	Up-regulated
Sus_scrofa___FAM83B	3.6676	3.51557	13.7907	0.00083181	0.0146903	3	4	Up-regulated
Sus_scrofa___TACO1	2.68093	3.0116	13.9257	0.000838374	0.0147798	3	4	Up-regulated
Sus_scrofa___KIF24	4.31265	2.64856	13.9989	0.000839686	0.0147897	3	4	Up-regulated
Sus_scrofa___NSRP1	0.777372	7.33498	14.4049	0.000843232	0.0148125	3	4	Up-regulated
Sus_scrofa___FLVCR1	1.68401	5.06576	14.3653	0.00085308	0.0149527	3	4	Up-regulated
Sus_scrofa___KDM8	1.76111	4.56118	14.3099	0.000855313	0.0149581	3	4	Up-regulated
Sus_scrofa___FAN1	1.47321	5.84939	14.3421	0.000863846	0.015094	3	4	Up-regulated
Sus_scrofa___PAK1IP1	1.88372	4.39929	14.2835	0.000865145	0.0151033	3	4	Up-regulated
Sus_scrofa___EIF1AD	2.73377	2.11008	13.3933	0.000867028	0.0151208	3	4	Up-regulated
Sus_scrofa___ENSSSCG00000007188	1.47495	6.13656	14.2712	0.000884387	0.0153307	3	4	Up-regulated
Sus_scrofa___CTSC	2.86446	5.83986	14.2721	0.000887483	0.0153372	3	4	Up-regulated
Sus_scrofa___ENSSSCG00000012262	0.822587	8.36072	14.2512	0.000887739	0.0153372	3	4	Up-regulated
Sus_scrofa___TXNL1	1.78529	5.8257	14.2629	0.000887872	0.0153372	3	4	Up-regulated
Sus_scrofa___FAM20C	2.34754	4.8357	14.1177	0.000888882	0.0153412	3	4	Up-regulated
Sus_scrofa___C7H6orf125	1.84655	4.33588	14.1219	0.000890098	0.0153487	3	4	Up-regulated
Sus_scrofa___PGK1	2.63123	5.24173	14.2013	0.000896859	0.0154249	3	4	Up-regulated
Sus_scrofa___NDUFAF5	2.21624	4.1222	13.9913	0.000903364	0.0155095	3	4	Up-regulated
Sus_scrofa___KANK1	2.8946	5.67662	14.2221	0.000904565	0.0155095	3	4	Up-regulated
Sus_scrofa___PM20D2	2.38043	3.755	14.0168	0.000906969	0.0155182	3	4	Up-regulated
Sus_scrofa___NUP93	1.98918	4.25596	14.057	0.000907003	0.0155182	3	4	Up-regulated
Sus_scrofa___CCDC194	2.48358	2.43775	13.2812	0.000908183	0.0155249	3	4	Up-regulated
Sus_scrofa___IL6	4.67121	2.42593	13.163	0.000911488	0.0155679	3	4	Up-regulated
Sus_scrofa___ENSSSCG00000013260	2.06133	3.4466	14.0206	0.000921108	0.0157186	3	4	Up-regulated
Sus_scrofa___TRMT5	2.02222	3.57954	13.8605	0.000922148	0.0157227	3	4	Up-regulated
Sus_scrofa___DUSP5	3.7909	3.69281	13.6737	0.000930552	0.0158387	3	4	Up-regulated
Sus_scrofa___SPCS3	1.47999	5.34543	14.1187	0.000932067	0.0158508	3	4	Up-regulated
Sus_scrofa___ENSSSCG00000035904	1.72289	6.72719	14.0747	0.000942865	0.0159829	3	4	Up-regulated
Sus_scrofa___MPHOSPH10	1.35806	5.00776	14.0855	0.000944226	0.0159829	3	4	Up-regulated
Sus_scrofa___SNRPG	1.5999	4.73844	14.0704	0.000946206	0.0159829	3	4	Up-regulated
Sus_scrofa___ENSSSCG00000040187	1.71296	4.47473	14.0272	0.00094694	0.0159829	3	4	Up-regulated
Sus_scrofa___NXT2	5.58754	1.58777	13.3062	0.000950396	0.0160243	3	4	Up-regulated
Sus_scrofa___IKBKE	2.13842	3.05343	13.6368	0.000953055	0.0160554	3	4	Up-regulated
Sus_scrofa___RRP8	2.06241	4.28228	13.8752	0.000955105	0.0160628	3	4	Up-regulated
Sus_scrofa___SELENOT	1.46373	5.4883	14.0386	0.000958029	0.0160843	3	4	Up-regulated
Sus_scrofa___ENSSSCG00000037299	1.65745	3.90485	13.9619	0.000962324	0.0161313	3	4	Up-regulated
Sus_scrofa___CGAS	2.2211	4.17721	13.9755	0.000962464	0.0161313	3	4	Up-regulated
Sus_scrofa___CRK	0.866686	8.22326	13.9773	0.000973822	0.0162864	3	4	Up-regulated
Sus_scrofa___PSMB7	1.02621	6.00007	13.97	0.000978572	0.0163181	3	4	Up-regulated
Sus_scrofa___ENSSSCG00000013082	2.34465	3.20047	13.4993	0.000997758	0.016568	3	4	Up-regulated
Sus_scrofa___ENSSSCG00000020830	2.35942	4.80055	13.8871	0.000999772	0.0165735	3	4	Up-regulated
Sus_scrofa___RTKN2	2.02113	4.38591	13.8209	0.00100774	0.0166773	3	4	Up-regulated
Sus_scrofa___ENSSSCG00000011081	2.79822	2.66863	13.3059	0.00100857	0.0166773	3	4	Up-regulated
Sus_scrofa___PSMF1	1.5325	6.15898	13.8576	0.00101608	0.0167874	3	4	Up-regulated
Sus_scrofa___GART	0.990997	5.68326	13.8573	0.00101737	0.0167947	3	4	Up-regulated
Sus_scrofa___ENSSSCG00000020686	1.97122	4.98383	13.8439	0.00102431	0.0168733	3	4	Up-regulated
Sus_scrofa___FOS	3.77184	6.37788	13.8068	0.0010247	0.0168733	3	4	Up-regulated
Sus_scrofa___CSDE1	0.767966	7.41722	13.8223	0.00102665	0.0168913	3	4	Up-regulated
Sus_scrofa___PIGK	1.63574	5.08765	13.8181	0.00103289	0.0169556	3	4	Up-regulated
Sus_scrofa___SLC1A3	3.00459	7.21132	13.8097	0.00103314	0.0169556	3	4	Up-regulated
Sus_scrofa___RHOBTB3	1.73967	6.55966	13.8024	0.00103483	0.0169693	3	4	Up-regulated
Sus_scrofa___ENSSSCG00000045482	1.23732	6.48501	13.794	0.00103755	0.016996	3	4	Up-regulated
Sus_scrofa___BMP6	1.27709	8.76115	13.7735	0.00104368	0.0170538	3	4	Up-regulated
Sus_scrofa___AMMECR1	2.03509	6.08074	13.7835	0.00104492	0.0170538	3	4	Up-regulated
Sus_scrofa___ENSSSCG00000009523	2.38169	5.26447	13.7769	0.0010454	0.0170538	3	4	Up-regulated
Sus_scrofa___STX11	1.70153	4.89125	13.7765	0.00104603	0.0170538	3	4	Up-regulated
Sus_scrofa___ENSSSCG00000013593	1.73588	4.19876	13.7474	0.00104887	0.0170859	3	4	Up-regulated
Sus_scrofa___PANK1	3.35478	4.10139	13.4117	0.00105644	0.0171666	3	4	Up-regulated
Sus_scrofa___BLZF1	1.57867	4.50032	13.7072	0.00105788	0.0171759	3	4	Up-regulated
Sus_scrofa___ZNF697	2.28435	5.66546	13.738	0.00105982	0.0171792	3	4	Up-regulated
Sus_scrofa___TFB1M	1.38105	6.12209	13.7233	0.00106359	0.0172262	3	4	Up-regulated
Sus_scrofa___EPRS1	1.03642	6.55372	13.7124	0.00106688	0.017262	3	4	Up-regulated
Sus_scrofa___ENSSSCG00000008984	4.38212	3.18668	13.2211	0.00106846	0.017262	3	4	Up-regulated
Sus_scrofa___SERP1	2.04487	3.13605	13.3859	0.00106908	0.017262	3	4	Up-regulated
Sus_scrofa___STIP1	2.89033	3.55573	13.2937	0.0010693	0.017262	3	4	Up-regulated
Sus_scrofa___VDAC2	2.18382	4.1087	13.6382	0.00107039	0.0172653	3	4	Up-regulated
Sus_scrofa___PUS7	1.08998	7.35337	13.6867	0.00107547	0.0173155	3	4	Up-regulated
Sus_scrofa___SMG5	2.42367	4.11953	13.4668	0.00108044	0.0173659	3	4	Up-regulated
Sus_scrofa___ENSSSCG00000025224	2.26238	4.62012	13.6685	0.00108103	0.0173659	3	4	Up-regulated
Sus_scrofa___PDE12	2.80321	3.3323	13.23	0.00108992	0.0174732	3	4	Up-regulated
Sus_scrofa___DCAF8	0.878459	6.28835	13.647	0.00109105	0.0174732	3	4	Up-regulated
Sus_scrofa___PSME4	1.27226	8.23496	13.6387	0.00109303	0.0174876	3	4	Up-regulated
Sus_scrofa___ENSSSCG00000007554	1.72661	4.662	13.5828	0.00110559	0.0176599	3	4	Up-regulated
Sus_scrofa___ROR1	2.2716	10.1213	13.5903	0.00111117	0.0177204	3	4	Up-regulated
Sus_scrofa___RASA1	1.37962	8.44277	13.5845	0.00111345	0.0177424	3	4	Up-regulated
Sus_scrofa___FEM1C	1.70737	5.09517	13.5682	0.00112386	0.0178918	3	4	Up-regulated
Sus_scrofa___ENSSSCG00000035751	2.72875	6.66639	13.5582	0.00112671	0.0178918	3	4	Up-regulated
Sus_scrofa___REXO2	0.909528	8.89717	13.5489	0.00112709	0.0178918	3	4	Up-regulated
Sus_scrofa___TM9SF4	0.975325	6.34315	13.5499	0.001128	0.0178918	3	4	Up-regulated
Sus_scrofa___JAK2	0.92395	9.24483	13.5462	0.00112812	0.0178918	3	4	Up-regulated
Sus_scrofa___ZNF317	1.38097	4.38071	13.5248	0.00113098	0.01791	3	4	Up-regulated
Sus_scrofa___IARS1	0.851213	7.79972	13.5269	0.00113575	0.0179382	3	4	Up-regulated
Sus_scrofa___ENSSSCG00000038633	1.70611	4.7955	13.5082	0.00114588	0.0180694	3	4	Up-regulated
Sus_scrofa___HSPA8	1.20728	5.95685	13.4876	0.00115423	0.018143	3	4	Up-regulated
Sus_scrofa___ST6GAL2	2.35612	5.93017	13.4493	0.00116985	0.0183157	3	4	Up-regulated
Sus_scrofa___ENSSSCG00000016441	1.70835	4.51468	13.4045	0.00117519	0.0183812	3	4	Up-regulated
Sus_scrofa___RDH10	2.10894	7.11219	13.428	0.00117647	0.0183812	3	4	Up-regulated
Sus_scrofa___ITM2C	1.71369	3.69635	13.3835	0.00118189	0.0184392	3	4	Up-regulated
Sus_scrofa___ENSSSCG00000016255	5.66064	2.90357	12.6416	0.00118249	0.0184392	3	4	Up-regulated
Sus_scrofa___SERTAD3	2.26744	3.16024	13.0955	0.00118466	0.0184392	3	4	Up-regulated
Sus_scrofa___G3BP2	1.76552	6.14141	13.4109	0.00118523	0.0184392	3	4	Up-regulated
Sus_scrofa___ENSSSCG00000010370	4.39221	3.11702	12.5051	0.00118975	0.018492	3	4	Up-regulated
Sus_scrofa___METTL21A	1.21333	6.31374	13.3928	0.00119139	0.018492	3	4	Up-regulated
Sus_scrofa___WDR26	0.937714	6.04419	13.3644	0.00120319	0.0186452	3	4	Up-regulated
Sus_scrofa___ENSSSCG00000020808	1.2577	6.01539	13.3569	0.00120709	0.0186482	3	4	Up-regulated
Sus_scrofa___TRNP1	4.82948	2.67017	13.2806	0.00121189	0.018665	3	4	Up-regulated
Sus_scrofa___GPI	1.61754	6.86157	13.3424	0.00121203	0.018665	3	4	Up-regulated
Sus_scrofa___CEP57	1.20051	5.5257	13.3471	0.00121312	0.0186657	3	4	Up-regulated
Sus_scrofa___UBE2R2	0.780847	8.32014	13.3023	0.00122716	0.0188043	3	4	Up-regulated
Sus_scrofa___HSP90AB1	1.5287	5.87117	13.3091	0.00122776	0.0188043	3	4	Up-regulated
Sus_scrofa___PTK7	1.31975	6.54588	13.2992	0.00122993	0.0188084	3	4	Up-regulated
Sus_scrofa___CSTF2	1.57932	4.3915	13.2393	0.00123124	0.0188138	3	4	Up-regulated
Sus_scrofa___FOXRED1	1.59114	4.52587	13.2777	0.00123705	0.0188707	3	4	Up-regulated
Sus_scrofa___RCOR2	5.7089	1.94511	13.1965	0.00124608	0.0188707	3	4	Up-regulated
Sus_scrofa___C9orf85	1.72908	4.60769	13.2683	0.00124654	0.0188707	3	4	Up-regulated
Sus_scrofa___ENSSSCG00000036257	1.60149	4.86721	13.2516	0.00124717	0.0188707	3	4	Up-regulated
Sus_scrofa___ENSSSCG00000006061	1.92524	6.13694	13.2616	0.0012481	0.0188707	3	4	Up-regulated
Sus_scrofa___SNAPC1	1.90508	6.02232	13.2549	0.00125145	0.0188783	3	4	Up-regulated
Sus_scrofa___PABPC1	1.02918	7.11461	13.2442	0.00125247	0.0188783	3	4	Up-regulated
Sus_scrofa___ACVR2A	1.05542	7.66741	13.22	0.00126291	0.0189744	3	4	Up-regulated
Sus_scrofa___ENSSSCG00000021069	2.28992	3.28136	12.9902	0.00126507	0.0189924	3	4	Up-regulated
Sus_scrofa___DHX58	3.74302	4.06463	12.7883	0.00127264	0.0190697	3	4	Up-regulated
Sus_scrofa___ERRFI1	2.93251	7.42471	13.2011	0.00127409	0.0190697	3	4	Up-regulated
Sus_scrofa___ABRACL	2.90965	2.60287	12.4873	0.00127568	0.019079	3	4	Up-regulated
Sus_scrofa___TMED10	1.09536	6.45124	13.1822	0.00128057	0.0191088	3	4	Up-regulated
Sus_scrofa___DCLRE1B	2.56418	2.88206	12.6915	0.00128187	0.0191137	3	4	Up-regulated
Sus_scrofa___ENSSSCG00000009126	4.72661	2.06688	12.6615	0.00128399	0.0191164	3	4	Up-regulated
Sus_scrofa___RAD9B	2.39003	3.43786	13.0048	0.00128536	0.0191212	3	4	Up-regulated
Sus_scrofa___FKBP10	1.16966	5.30512	13.1802	0.00128625	0.0191212	3	4	Up-regulated
Sus_scrofa___WDCP	1.90399	3.43144	12.8942	0.00129253	0.0191778	3	4	Up-regulated
Sus_scrofa___CMTR1	0.80205	7.12615	13.148	0.00129492	0.0191778	3	4	Up-regulated
Sus_scrofa___FAF2	0.842332	6.23387	13.146	0.00129702	0.0191861	3	4	Up-regulated
Sus_scrofa___HPRT1	1.52541	5.16014	13.1529	0.00129742	0.0191861	3	4	Up-regulated
Sus_scrofa___PARP3	2.61317	3.28724	12.7969	0.00130483	0.0192481	3	4	Up-regulated
Sus_scrofa___TERF2IP	1.39448	5.04698	13.1365	0.00130672	0.0192515	3	4	Up-regulated
Sus_scrofa___ME1	3.51599	5.80166	12.9816	0.00131847	0.0193847	3	4	Up-regulated
Sus_scrofa___YWHAZ	1.2823	7.94715	13.0953	0.00131871	0.0193847	3	4	Up-regulated
Sus_scrofa___ENSSSCG00000014565	2.05638	6.07297	13.0936	0.00132226	0.0194224	3	4	Up-regulated
Sus_scrofa___LONP2	1.34478	7.36572	13.0519	0.00133905	0.0196251	3	4	Up-regulated
Sus_scrofa___AGO1	0.905906	7.62446	13.043	0.00134296	0.0196678	3	4	Up-regulated
Sus_scrofa___ENSSSCG00000014672	2.97713	4.86039	13.0244	0.00135072	0.0197521	3	4	Up-regulated
Sus_scrofa___RPS13	1.89046	3.14835	12.8541	0.001357	0.0198147	3	4	Up-regulated
Sus_scrofa___WDSUB1	1.7539	5.24657	13.0245	0.00135924	0.0198326	3	4	Up-regulated
Sus_scrofa___ATPAF1	1.54636	5.25694	13.0036	0.00136842	0.0199223	3	4	Up-regulated
Sus_scrofa___EGR2	3.10909	3.28983	12.5929	0.00136962	0.0199252	3	4	Up-regulated
Sus_scrofa___MED20	1.90315	4.21573	12.9316	0.00137519	0.0199915	3	4	Up-regulated
Sus_scrofa___HILPDA	2.85308	2.62029	12.4517	0.00137841	0.0199983	3	4	Up-regulated
Sus_scrofa___SKP2	2.37224	3.84475	12.7259	0.00138401	0.0200083	3	4	Up-regulated
Sus_scrofa___TLCD2	2.75842	4.08229	12.6678	0.00138587	0.020014	3	4	Up-regulated
Sus_scrofa___VLDLR	3.26744	3.69176	12.6856	0.00140076	0.0201747	3	4	Up-regulated
Sus_scrofa___ENSSSCG00000022295	1.22869	5.91299	12.9287	0.00140109	0.0201747	3	4	Up-regulated
Sus_scrofa___ENSSSCG00000012566	2.02229	4.4303	12.84	0.00141489	0.0203437	3	4	Up-regulated
Sus_scrofa___JUNB	3.62275	2.17925	12.4846	0.00141787	0.0203718	3	4	Up-regulated
Sus_scrofa___PRMT7	1.25825	6.25288	12.8834	0.00142222	0.0204172	3	4	Up-regulated
Sus_scrofa___ATP6V1C1	0.871471	6.56985	12.8787	0.00142311	0.0204172	3	4	Up-regulated
Sus_scrofa___USO1	0.971523	7.65951	12.8672	0.00142819	0.0204752	3	4	Up-regulated
Sus_scrofa___CLYBL	1.22442	6.03944	12.8685	0.00143	0.0204863	3	4	Up-regulated
Sus_scrofa___PREB	2.15843	4.21119	12.7469	0.00143199	0.0204999	3	4	Up-regulated
Sus_scrofa___RWDD3	1.56366	4.53709	12.8689	0.0014365	0.0205459	3	4	Up-regulated
Sus_scrofa___PHB	1.37435	4.51496	12.8471	0.00144046	0.0205599	3	4	Up-regulated
Sus_scrofa___PTPN11	1.00811	6.94853	12.8435	0.00144056	0.0205599	3	4	Up-regulated
Sus_scrofa___ENSSSCG00000026488	0.888089	7.17426	12.8413	0.00144139	0.0205599	3	4	Up-regulated
Sus_scrofa___NUDT2	3.26876	2.57737	12.5058	0.00144902	0.0206538	3	4	Up-regulated
Sus_scrofa___SPRYD4	2.77634	2.78022	12.4372	0.00145355	0.0207034	3	4	Up-regulated
Sus_scrofa___SYCP2	2.82413	6.60154	12.8021	0.00146071	0.0207675	3	4	Up-regulated
Sus_scrofa___UBA5	0.806762	6.30328	12.805	0.00146121	0.0207675	3	4	Up-regulated
Sus_scrofa___MRPS36	2.50237	3.59591	12.487	0.00146977	0.0208327	3	4	Up-regulated
Sus_scrofa___FLAD1	3.37404	3.02038	12.5364	0.00147002	0.0208327	3	4	Up-regulated
Sus_scrofa___TRAF3IP2	0.993676	7.43004	12.7826	0.00147129	0.0208358	3	4	Up-regulated
Sus_scrofa___PRICKLE2	1.31968	9.50887	12.7733	0.00147584	0.0208852	3	4	Up-regulated
Sus_scrofa___SELENOF	1.40777	5.43386	12.7589	0.00148944	0.0210324	3	4	Up-regulated
Sus_scrofa___TIMM21	2.38552	2.89968	12.2994	0.00149105	0.02104	3	4	Up-regulated
Sus_scrofa___GATA4	1.99038	7.58212	12.7242	0.0015019	0.0211632	3	4	Up-regulated
Sus_scrofa___PPP5C	1.63258	3.88301	12.6519	0.00150193	0.0211632	3	4	Up-regulated
Sus_scrofa___TSKU	1.44987	4.58654	12.7242	0.00150444	0.0211759	3	4	Up-regulated
Sus_scrofa___SSR4	3.16919	4.20277	12.6241	0.00151962	0.0213295	3	4	Up-regulated
Sus_scrofa___WDR12	1.15593	5.39077	12.6961	0.00152257	0.0213381	3	4	Up-regulated
Sus_scrofa___F3	4.74226	2.73012	12.2034	0.00152299	0.0213381	3	4	Up-regulated
Sus_scrofa___PSMA3	1.02765	6.54074	12.6781	0.00152749	0.0213441	3	4	Up-regulated
Sus_scrofa___IFIH1	2.26125	6.9559	12.6701	0.00153189	0.0213717	3	4	Up-regulated
Sus_scrofa___POLR1G	2.14604	3.22085	12.2921	0.00153533	0.0213957	3	4	Up-regulated
Sus_scrofa___DBF4B	2.54557	2.98797	12.2959	0.00153687	0.0213957	3	4	Up-regulated
Sus_scrofa___XPNPEP1	1.10093	6.20079	12.652	0.00154177	0.0214338	3	4	Up-regulated
Sus_scrofa___TMED7	1.57104	4.75273	12.6409	0.00154942	0.0215098	3	4	Up-regulated
Sus_scrofa___AIFM2	2.44277	3.16338	12.2624	0.00155798	0.0215938	3	4	Up-regulated
Sus_scrofa___YTHDF3	1.03249	6.17983	12.6199	0.00155985	0.0215938	3	4	Up-regulated
Sus_scrofa___SAMD9	2.02083	5.93408	12.6181	0.00156261	0.0216169	3	4	Up-regulated
Sus_scrofa___ENSSSCG00000001516	5.69298	1.87073	12.2874	0.00157803	0.0216967	3	4	Up-regulated
Sus_scrofa___SLC25A5	3.49196	2.9618	12.1543	0.00159079	0.0218379	3	4	Up-regulated
Sus_scrofa___CHST9	3.7894	5.72993	12.4446	0.00160874	0.0219776	3	4	Up-regulated
Sus_scrofa___P3H1	0.921085	6.85721	12.515	0.00161746	0.0220509	3	4	Up-regulated
Sus_scrofa___CDV3	1.10804	6.60006	12.4938	0.00163043	0.0221401	3	4	Up-regulated
Sus_scrofa___EHD4	1.72155	6.33223	12.4905	0.00163382	0.0221401	3	4	Up-regulated
Sus_scrofa___PRMT1	1.49722	5.00883	12.4905	0.00163411	0.0221401	3	4	Up-regulated
Sus_scrofa___PLCXD3	2.19193	7.06704	12.4841	0.00163881	0.0221582	3	4	Up-regulated
Sus_scrofa___VAPA	0.909635	7.6708	12.4613	0.0016481	0.0222229	3	4	Up-regulated
Sus_scrofa___ENSSSCG00000005901	1.97907	3.79045	12.3209	0.00165396	0.0222776	3	4	Up-regulated
Sus_scrofa___EGR1	1.97733	6.56964	12.4433	0.00166268	0.0223431	3	4	Up-regulated
Sus_scrofa___IFIT5	2.56557	5.42008	12.4121	0.00168441	0.022543	3	4	Up-regulated
Sus_scrofa___FAM78B	3.74409	6.58289	12.3936	0.00168905	0.0225897	3	4	Up-regulated
Sus_scrofa___DAAM1	1.31059	9.01822	12.3889	0.00169087	0.0225988	3	4	Up-regulated
Sus_scrofa___TAMM41	1.70902	4.44558	12.3547	0.00169304	0.0226106	3	4	Up-regulated
Sus_scrofa___ENSSSCG00000049011	4.17535	2.29754	12.125	0.00169405	0.0226106	3	4	Up-regulated
Sus_scrofa___OSBPL6	1.45926	8.40916	12.3786	0.00169713	0.0226211	3	4	Up-regulated
Sus_scrofa___USP6NL	1.03341	6.2849	12.3733	0.00170213	0.0226618	3	4	Up-regulated
Sus_scrofa___SFRP1	2.29245	8.38093	12.3675	0.00170405	0.0226618	3	4	Up-regulated
Sus_scrofa___AMD1	2.67252	4.64845	12.2417	0.00170477	0.0226618	3	4	Up-regulated
Sus_scrofa___NDUFA9	2.15626	4.04552	12.2657	0.00170967	0.0226809	3	4	Up-regulated
Sus_scrofa___ADM	2.97464	6.32537	12.3091	0.0017138	0.0227205	3	4	Up-regulated
Sus_scrofa___TECTA	1.24732	5.77158	12.3423	0.00172244	0.0228045	3	4	Up-regulated
Sus_scrofa___NUDT15	3.75107	1.96109	11.7256	0.00172704	0.02285	3	4	Up-regulated
Sus_scrofa___CCND3	1.59419	9.52166	12.3107	0.00173862	0.0229723	3	4	Up-regulated
Sus_scrofa___MSRB2	2.45111	3.50391	12.1179	0.00174192	0.022989	3	4	Up-regulated
Sus_scrofa___KATNAL2	2.35764	3.00652	11.9521	0.00174221	0.022989	3	4	Up-regulated
Sus_scrofa___USPL1	1.01005	6.03671	12.3011	0.00174752	0.0230437	3	4	Up-regulated
Sus_scrofa___RIOX2	1.73204	5.2861	12.2499	0.00178473	0.0234679	3	4	Up-regulated
Sus_scrofa___STK40	1.73304	4.80165	12.2227	0.00178658	0.0234679	3	4	Up-regulated
Sus_scrofa___SMYD2	1.36242	5.06513	12.2396	0.00178724	0.0234679	3	4	Up-regulated
Sus_scrofa___SNAP47	1.27621	6.08582	12.2381	0.00178802	0.0234679	3	4	Up-regulated
Sus_scrofa___USP14	0.863781	6.25525	12.2315	0.00179049	0.0234691	3	4	Up-regulated
Sus_scrofa___FBXO39	2.33363	7.02094	12.2282	0.00179191	0.0234721	3	4	Up-regulated
Sus_scrofa___APP	0.854028	8.87985	12.2189	0.0017966	0.023518	3	4	Up-regulated
Sus_scrofa___UBE2L6	2.47776	5.39226	12.2214	0.00180586	0.0236235	3	4	Up-regulated
Sus_scrofa___SNX19	1.28986	4.88318	12.2076	0.00181061	0.0236405	3	4	Up-regulated
Sus_scrofa___ZZZ3	0.885813	8.28256	12.1901	0.00181531	0.023651	3	4	Up-regulated
Sus_scrofa___TMEM59L	6.06233	1.87876	11.5575	0.00181636	0.023651	3	4	Up-regulated
Sus_scrofa___PPIL1	1.75102	3.70976	12.0704	0.00182261	0.0236583	3	4	Up-regulated
Sus_scrofa___LRRC32	1.95741	3.80848	12.089	0.00182261	0.0236583	3	4	Up-regulated
Sus_scrofa___ICAM1	1.76616	5.24007	12.1818	0.0018227	0.0236583	3	4	Up-regulated
Sus_scrofa___TRIB2	2.4569	6.13353	12.1874	0.00182292	0.0236583	3	4	Up-regulated
Sus_scrofa___PHLDA1	6.36471	2.56733	12.2628	0.00182661	0.0236906	3	4	Up-regulated
Sus_scrofa___SEC13	0.939363	6.71679	12.1682	0.0018307	0.0237281	3	4	Up-regulated
Sus_scrofa___PARP14	3.074	6.16854	12.1758	0.00183215	0.0237314	3	4	Up-regulated
Sus_scrofa___TENM3	1.29568	9.27104	12.1621	0.00183359	0.0237344	3	4	Up-regulated
Sus_scrofa___DOLPP1	3.07736	2.44686	11.6709	0.00183954	0.0237802	3	4	Up-regulated
Sus_scrofa___RPS9	1.28495	6.923	12.1466	0.0018447	0.0238313	3	4	Up-regulated
Sus_scrofa___ENSSSCG00000005453	1.24971	5.31237	12.149	0.00185013	0.0238701	3	4	Up-regulated
Sus_scrofa___STRN	1.86939	5.53465	12.141	0.00185469	0.0239133	3	4	Up-regulated
Sus_scrofa___ENSSSCG00000013862	1.29092	5.11766	12.1256	0.00186375	0.0240144	3	4	Up-regulated
Sus_scrofa___GAREM1	2.17626	7.66065	12.1006	0.00187505	0.0241286	3	4	Up-regulated
Sus_scrofa___IGFBP4	1.97197	6.78179	12.0972	0.00188051	0.0241673	3	4	Up-regulated
Sus_scrofa___RAD23A	1.63053	4.6999	12.0796	0.00188264	0.02417	3	4	Up-regulated
Sus_scrofa___RYBP	0.965865	7.16152	12.0773	0.00189085	0.0242528	3	4	Up-regulated
Sus_scrofa___POMGNT1	1.64555	4.00194	12.0493	0.0018926	0.0242567	3	4	Up-regulated
Sus_scrofa___TRIM56	1.71375	4.17085	12.0583	0.00189361	0.0242567	3	4	Up-regulated
Sus_scrofa___CDC20B	3.18394	3.98707	11.7347	0.00190059	0.0242748	3	4	Up-regulated
Sus_scrofa___LRPPRC	1.19185	6.67604	12.065	0.00190064	0.0242748	3	4	Up-regulated
Sus_scrofa___C19orf53	1.39749	3.87382	12.031	0.00190075	0.0242748	3	4	Up-regulated
Sus_scrofa___HES4	3.05281	2.03907	11.2595	0.00190241	0.0242748	3	4	Up-regulated
Sus_scrofa___PRKN	1.07431	8.63349	12.0573	0.00190388	0.0242779	3	4	Up-regulated
Sus_scrofa___ZNF783	1.54134	4.40837	12.0615	0.00190554	0.0242796	3	4	Up-regulated
Sus_scrofa___H6PD	2.13588	4.88223	12.0491	0.00190648	0.0242796	3	4	Up-regulated
Sus_scrofa___IFI44	2.7256	7.01883	12.0513	0.00190998	0.0243086	3	4	Up-regulated
Sus_scrofa___ELP3	1.0619	5.70917	12.0448	0.00191726	0.0243696	3	4	Up-regulated
Sus_scrofa___BMPR1A	0.939307	8.19422	12.023	0.00192763	0.0244554	3	4	Up-regulated
Sus_scrofa___C4A	3.25901	5.49981	11.9573	0.00192995	0.0244554	3	4	Up-regulated
Sus_scrofa___SMYD5	2.47672	3.22802	11.6915	0.0019302	0.0244554	3	4	Up-regulated
Sus_scrofa___HERC6	2.34691	8.32645	12.0157	0.00193283	0.0244731	3	4	Up-regulated
Sus_scrofa___CXCL10	3.81542	4.18081	11.8926	0.0019372	0.0245047	3	4	Up-regulated
Sus_scrofa___ETV6	1.0129	9.33161	11.9957	0.00194663	0.0246003	3	4	Up-regulated
Sus_scrofa___KITLG	1.01287	8.3669	11.9915	0.00194961	0.0246223	3	4	Up-regulated
pCMV_____gp45	7.74497	1.67932	13.8349	0.00197174	0.0247749	3	4	Up-regulated
Sus_scrofa___PSMA5	1.43547	5.11661	11.9646	0.00197766	0.0248334	3	4	Up-regulated
Sus_scrofa___ADSL	1.40304	4.40764	11.9634	0.00198077	0.0248566	3	4	Up-regulated
Sus_scrofa___FAM155A	2.69981	3.6796	11.8503	0.00199237	0.0249777	3	4	Up-regulated
Sus_scrofa___TBX3	2.03007	3.98518	11.8575	0.00199295	0.0249777	3	4	Up-regulated
Sus_scrofa___PSMA6	0.76353	6.91957	11.925	0.00199756	0.0250182	3	4	Up-regulated
Sus_scrofa___MRPS28	1.8714	5.63341	11.9286	0.00199943	0.0250182	3	4	Up-regulated
Sus_scrofa___ENSSSCG00000015691	3.46771	2.19259	11.5135	0.00199999	0.0250182	3	4	Up-regulated
Sus_scrofa___FN1	1.91701	9.73504	11.8996	0.00201531	0.0251712	3	4	Up-regulated
Sus_scrofa___SENP8	2.42889	3.41517	11.6483	0.00201988	0.0251714	3	4	Up-regulated
Sus_scrofa___POLE4	1.32897	4.67708	11.879	0.00203711	0.025354	3	4	Up-regulated
Sus_scrofa___PHOSPHO2	2.44905	2.87577	11.5093	0.00205422	0.0254756	3	4	Up-regulated
Sus_scrofa___RHOT1	1.83196	5.87153	11.8551	0.00205463	0.0254756	3	4	Up-regulated
Sus_scrofa___ADIPOR2	2.20214	4.70767	11.8251	0.00205653	0.0254832	3	4	Up-regulated
Sus_scrofa___VDAC3	2.27946	4.19653	11.7373	0.00206368	0.0255557	3	4	Up-regulated
Sus_scrofa___VCL	2.55147	8.52931	11.817	0.00207712	0.0256736	3	4	Up-regulated
Sus_scrofa___PHC2	1.04318	7.01592	11.8108	0.00208196	0.0256736	3	4	Up-regulated
Sus_scrofa___MSANTD3-TMEFF1	2.80289	3.39205	11.5245	0.00209619	0.0257802	3	4	Up-regulated
Sus_scrofa___CA12	2.18071	6.05066	11.7757	0.00211725	0.0259907	3	4	Up-regulated
Sus_scrofa___SEC24D	1.08944	8.76561	11.7497	0.00212784	0.026072	3	4	Up-regulated
Sus_scrofa___ENSSSCG00000016828	1.3026	4.58821	11.7444	0.00214045	0.0262102	3	4	Up-regulated
Sus_scrofa___FBXO28	0.922546	6.21795	11.7262	0.00214829	0.0262651	3	4	Up-regulated
Sus_scrofa___GORASP2	1.09466	6.6254	11.7017	0.00216682	0.0264183	3	4	Up-regulated
Sus_scrofa___ENSSSCG00000004489	1.1734	6.80211	11.6994	0.0021682	0.0264188	3	4	Up-regulated
Sus_scrofa___MRPL36	3.04335	2.17803	10.9725	0.00218146	0.0265354	3	4	Up-regulated
Sus_scrofa___IMMP1L	1.35043	6.05257	11.6842	0.0021832	0.0265361	3	4	Up-regulated
Sus_scrofa___DMC1	5.38948	2.62618	11.6237	0.00219336	0.0266431	3	4	Up-regulated
Sus_scrofa___SYT14	4.72582	2.46748	11.5737	0.00219857	0.0266871	3	4	Up-regulated
Sus_scrofa___SLC16A3	4.64948	3.43512	11.4211	0.0022031	0.0266971	3	4	Up-regulated
Sus_scrofa___SLC25A15	1.40433	5.03811	11.66	0.00220322	0.0266971	3	4	Up-regulated
Sus_scrofa___ENSSSCG00000049674	3.39689	1.64304	10.8221	0.00221936	0.0268762	3	4	Up-regulated
Sus_scrofa___IKBIP	1.17723	5.64247	11.6385	0.00222134	0.0268765	3	4	Up-regulated
Sus_scrofa___MKKS	1.99586	3.28796	11.4222	0.00222215	0.0268765	3	4	Up-regulated
Sus_scrofa___UGP2	2.19234	8.28951	11.6296	0.00222347	0.0268765	3	4	Up-regulated
Sus_scrofa___CALU	0.97086	8.06666	11.625	0.00222681	0.0268881	3	4	Up-regulated
Sus_scrofa___ENSSSCG00000009341	0.904353	7.09439	11.6236	0.00222832	0.0268881	3	4	Up-regulated
Sus_scrofa___ATP5F1C	1.55503	4.65978	11.6352	0.00222852	0.0268881	3	4	Up-regulated
Sus_scrofa___PKM	2.39622	5.33104	11.6159	0.0022333	0.0269128	3	4	Up-regulated
Sus_scrofa___ERLEC1	1.06544	6.05602	11.6188	0.00223503	0.0269172	3	4	Up-regulated
Sus_scrofa___PEX13	1.44111	5.01346	11.6177	0.00224178	0.0269799	3	4	Up-regulated
Sus_scrofa___TANC1	1.24857	7.8717	11.5915	0.00225429	0.0270952	3	4	Up-regulated
Sus_scrofa___ENSSSCG00000050093	2.92923	2.5958	11.0107	0.0022553	0.0270952	3	4	Up-regulated
Sus_scrofa___ZBP1	3.01703	5.44141	11.5794	0.00227177	0.0272599	3	4	Up-regulated
Sus_scrofa___AMH	1.54244	4.8407	11.5537	0.00228453	0.0273631	3	4	Up-regulated
Sus_scrofa___EIF4E	1.63194	6.11956	11.5531	0.00229162	0.0274146	3	4	Up-regulated
Sus_scrofa___NDUFB6	2.02077	3.94659	11.4625	0.00231029	0.0275084	3	4	Up-regulated
Sus_scrofa___SYNCRIP	0.887143	7.01027	11.5247	0.00231061	0.0275084	3	4	Up-regulated
Sus_scrofa___NOLC1	1.53314	4.71695	11.5053	0.00231334	0.0275202	3	4	Up-regulated
Sus_scrofa___KCND3	3.1428	5.94655	11.5084	0.00231579	0.0275202	3	4	Up-regulated
Sus_scrofa___ROR2	2.5234	7.86176	11.5167	0.00231727	0.0275212	3	4	Up-regulated
Sus_scrofa___TSC22D1	1.04145	7.47377	11.5128	0.00232026	0.0275402	3	4	Up-regulated
Sus_scrofa___PDK1	1.5597	5.68741	11.5035	0.00233489	0.0276805	3	4	Up-regulated
Sus_scrofa___MTRES1	2.99457	2.87948	11.1645	0.00234032	0.0277283	3	4	Up-regulated
Sus_scrofa___PXK	0.876032	7.36527	11.4679	0.0023588	0.0279137	3	4	Up-regulated
Sus_scrofa___ATG4A	2.63297	3.17897	11.1943	0.00236051	0.0279171	3	4	Up-regulated
Sus_scrofa___SIL1	0.953329	6.43693	11.4609	0.00236592	0.0279644	3	4	Up-regulated
Sus_scrofa___JADE1	2.44924	6.96257	11.4611	0.00236795	0.0279716	3	4	Up-regulated
Sus_scrofa___ENSSSCG00000011307	3.76523	1.89741	11.0902	0.00237163	0.0279983	3	4	Up-regulated
Sus_scrofa___ENSSSCG00000006324	1.46598	5.36655	11.4597	0.00237463	0.0280158	3	4	Up-regulated
Sus_scrofa___DARS1	0.890485	7.26965	11.446	0.00237787	0.0280216	3	4	Up-regulated
Sus_scrofa___LCOR	0.759238	8.02268	11.4342	0.00238779	0.028105	3	4	Up-regulated
Sus_scrofa___SNU13	1.45233	4.74147	11.4258	0.0024057	0.028282	3	4	Up-regulated
Sus_scrofa___PDE4A	1.42641	4.72752	11.3978	0.00241699	0.0283554	3	4	Up-regulated
Sus_scrofa___PCCB	1.15165	5.9976	11.4046	0.00241913	0.0283554	3	4	Up-regulated
Sus_scrofa___ENSSSCG00000030015	2.28681	2.14829	10.8151	0.00242939	0.0284225	3	4	Up-regulated
Sus_scrofa___C1QTNF1	2.06105	4.76001	11.3526	0.00243112	0.0284225	3	4	Up-regulated
Sus_scrofa___ZNF488	5.22774	1.00407	12.2365	0.0024335	0.0284225	3	4	Up-regulated
Papio_anubis_ENSPANG00000009679	4.67878	1.31435	10.6319	0.00244584	0.0285329	3	4	Up-regulated
Sus_scrofa___RLIM	0.817089	6.02864	11.3664	0.00245086	0.0285746	3	4	Up-regulated
Sus_scrofa___CEP41	2.36744	2.97694	11.0324	0.0024572	0.0286096	3	4	Up-regulated
Sus_scrofa___RPN2	1.44055	5.32226	11.3623	0.0024612	0.0286096	3	4	Up-regulated
Sus_scrofa___GOLPH3	0.906111	6.45418	11.3526	0.00246205	0.0286096	3	4	Up-regulated
Sus_scrofa___NIPSNAP2	1.83254	5.2308	11.3586	0.00246521	0.0286096	3	4	Up-regulated
Sus_scrofa___UCHL5	1.03678	5.67625	11.338	0.00247886	0.0287143	3	4	Up-regulated
Sus_scrofa___ECM1	1.25059	5.38276	11.3397	0.00248132	0.028726	3	4	Up-regulated
Sus_scrofa___KMT5A	1.08389	5.02339	11.3323	0.00248847	0.0287919	3	4	Up-regulated
Sus_scrofa___NMRK1	2.8611	2.16418	10.8043	0.00251385	0.0290004	3	4	Up-regulated
Sus_scrofa___KLHL26	1.66566	4.75527	11.2772	0.00253116	0.0291489	3	4	Up-regulated
Sus_scrofa___FKBP3	1.71413	4.19051	11.2684	0.00253758	0.0291869	3	4	Up-regulated
Sus_scrofa___MLLT11	4.08682	3.07896	11.0464	0.00256189	0.029417	3	4	Up-regulated
Sus_scrofa___RPL22	2.07657	4.9439	11.2591	0.00256386	0.0294179	3	4	Up-regulated
Sus_scrofa___RCC1L	1.42487	4.51652	11.2497	0.00256495	0.0294179	3	4	Up-regulated
Sus_scrofa___ENSSSCG00000009595	5.71571	1.73439	10.8618	0.00256779	0.0294306	3	4	Up-regulated
Sus_scrofa___SPPL2A	1.20667	5.78976	11.2363	0.00257439	0.0294406	3	4	Up-regulated
Sus_scrofa___ENSSSCG00000050709	3.583	2.35185	10.6144	0.00258331	0.0294742	3	4	Up-regulated
Sus_scrofa___MAPK8	1.01605	7.1742	11.2016	0.002602	0.0296532	3	4	Up-regulated
Sus_scrofa___HABP4	1.59237	5.57166	11.1495	0.00265388	0.0300886	3	4	Up-regulated
Sus_scrofa___CSMD3	1.66975	3.89726	11.0671	0.00265394	0.0300886	3	4	Up-regulated
Sus_scrofa___SETX	1.45891	8.26967	11.1444	0.00265713	0.0300962	3	4	Up-regulated
Sus_scrofa___MRM3	2.41634	3.22166	10.8552	0.0026688	0.0302051	3	4	Up-regulated
Sus_scrofa___CTDSPL	1.54388	8.75935	11.1295	0.00267171	0.0302207	3	4	Up-regulated
Sus_scrofa___ENSSSCG00000012703	1.07699	6.35417	11.1296	0.00267381	0.0302271	3	4	Up-regulated
Sus_scrofa___CSNK1A1	0.729839	7.95937	11.1234	0.00267791	0.0302561	3	4	Up-regulated
Sus_scrofa___TMEM9	3.30797	1.5069	10.5485	0.00269089	0.0303748	3	4	Up-regulated
Sus_scrofa___OTUB1	1.64323	3.33956	11.0174	0.00269149	0.0303748	3	4	Up-regulated
Sus_scrofa___ENSSSCG00000031589	3.12317	2.95124	10.7348	0.00270571	0.0304655	3	4	Up-regulated
Sus_scrofa___TFRC	3.42571	3.71957	10.6433	0.00271015	0.0304875	3	4	Up-regulated
Sus_scrofa___FAIM	2.53871	2.48635	10.6382	0.00271076	0.0304875	3	4	Up-regulated
Sus_scrofa___WDR75	1.34722	6.10381	11.0611	0.00274561	0.0308267	3	4	Up-regulated
Sus_scrofa___SLC30A1	2.95175	2.5265	10.7057	0.00274917	0.0308402	3	4	Up-regulated
Sus_scrofa___ENSSSCG00000040103	1.46591	4.46849	11.0365	0.00275967	0.0309318	3	4	Up-regulated
Sus_scrofa___TNK2	2.07388	4.89671	10.9847	0.00277701	0.0310453	3	4	Up-regulated
Sus_scrofa___IRS1	1.71404	5.61109	11.0324	0.00277879	0.0310453	3	4	Up-regulated
Sus_scrofa___ANXA13	5.34063	1.5232	10.6445	0.00277924	0.0310453	3	4	Up-regulated
Sus_scrofa___FUT11	3.04595	3.13972	10.7098	0.0027887	0.0311334	3	4	Up-regulated
Sus_scrofa___ENTPD4	1.23539	5.78952	11.0161	0.00279386	0.0311467	3	4	Up-regulated
Sus_scrofa___ENSSSCG00000022925	2.22723	7.11349	11.0106	0.00279463	0.0311467	3	4	Up-regulated
Sus_scrofa___CHRAC1	2.10747	3.34271	10.8498	0.0028013	0.0311955	3	4	Up-regulated
Sus_scrofa___THSD7B	1.98633	4.49463	11.0013	0.00280217	0.0311955	3	4	Up-regulated
Sus_scrofa___FUNDC1	2.19465	3.70112	10.9394	0.00281656	0.0313203	3	4	Up-regulated
Sus_scrofa___ZC3H12C	1.62919	6.23938	10.9872	0.00282145	0.031357	3	4	Up-regulated
Sus_scrofa___TADA2A	0.834043	6.53276	10.9771	0.00282953	0.0314291	3	4	Up-regulated
Sus_scrofa___MTMR10	1.17075	6.15531	10.9727	0.0028345	0.0314559	3	4	Up-regulated
Sus_scrofa___TOMM20	1.15561	5.13515	10.9803	0.00283512	0.0314559	3	4	Up-regulated
Sus_scrofa___PDIA5	1.61862	5.75173	10.9701	0.00284112	0.0315042	3	4	Up-regulated
Sus_scrofa___ENSSSCG00000017146	2.24358	8.17061	10.9603	0.00284554	0.0315182	3	4	Up-regulated
Sus_scrofa___H3-5	1.50626	7.27915	10.9573	0.00284889	0.0315376	3	4	Up-regulated
Sus_scrofa___CDCA7L	2.3569	3.43528	10.5136	0.00285676	0.0315893	3	4	Up-regulated
Sus_scrofa___TIMM44	2.02452	3.94645	10.8016	0.0028643	0.0316288	3	4	Up-regulated
Sus_scrofa___SRM	3.65104	3.28513	10.7186	0.00286514	0.0316288	3	4	Up-regulated
Sus_scrofa___WDR43	0.982306	7.30703	10.9378	0.00286991	0.031646	3	4	Up-regulated
Sus_scrofa___ANGPT4	2.5328	6.38693	10.9344	0.00287409	0.0316744	3	4	Up-regulated
Sus_scrofa___QTRT2	1.71439	4.22487	10.8768	0.00287869	0.0317074	3	4	Up-regulated
Sus_scrofa___FOSL1	5.76685	1.9396	10.4553	0.00288073	0.0317122	3	4	Up-regulated
Sus_scrofa___EIF3A	0.820963	6.75362	10.9212	0.00288825	0.0317521	3	4	Up-regulated
Sus_scrofa___ENSSSCG00000010161	3.83596	1.98732	10.4504	0.00292017	0.032039	3	4	Up-regulated
Sus_scrofa___NOD2	2.08609	3.80809	10.7543	0.0029218	0.0320391	3	4	Up-regulated
Sus_scrofa___AQP3	5.35652	4.35382	10.671	0.00292949	0.0320789	3	4	Up-regulated
Sus_scrofa___ENSSSCG00000029449	4.4152	4.97866	10.7022	0.00293281	0.0320789	3	4	Up-regulated
Sus_scrofa___ENSSSCG00000005307	3.89809	1.1607	10.1701	0.00293356	0.0320789	3	4	Up-regulated
Sus_scrofa___ORC3	0.86026	6.53345	10.8755	0.00293841	0.0321142	3	4	Up-regulated
Sus_scrofa___RAP1GDS1	1.13556	5.86113	10.8778	0.00294067	0.032121	3	4	Up-regulated
Sus_scrofa___TMEM33	1.23656	5.05017	10.8783	0.00294634	0.0321513	3	4	Up-regulated
Sus_scrofa___ALDH7A1	1.1686	5.77037	10.8703	0.00294818	0.0321513	3	4	Up-regulated
Sus_scrofa___GCLC	1.95644	4.24541	10.7638	0.00294833	0.0321513	3	4	Up-regulated
Sus_scrofa___GDF9	2.83039	2.45598	10.528	0.00295169	0.0321635	3	4	Up-regulated
Sus_scrofa___ENSSSCG00000012916	1.274	4.25763	10.8794	0.00295271	0.0321635	3	4	Up-regulated
Sus_scrofa___STAT3	0.838148	8.85536	10.8505	0.00296438	0.0322728	3	4	Up-regulated
Sus_scrofa___RBM28	1.02873	5.13314	10.8513	0.00297494	0.0323521	3	4	Up-regulated
Sus_scrofa___FUBP1	0.890979	7.35294	10.8396	0.00297696	0.0323562	3	4	Up-regulated
Sus_scrofa___MFF	1.24711	6.10604	10.7894	0.00303745	0.0328409	3	4	Up-regulated
Sus_scrofa___LARP1	0.8637	6.68197	10.7867	0.00303768	0.0328409	3	4	Up-regulated
Sus_scrofa___MCEE	2.98718	2.7049	10.4636	0.0030391	0.0328409	3	4	Up-regulated
Sus_scrofa___TWNK	1.93952	2.8126	10.4962	0.00303969	0.0328409	3	4	Up-regulated
Sus_scrofa___PTGIR	3.55578	1.77194	10.2662	0.00305623	0.0329816	3	4	Up-regulated
Sus_scrofa___PIGW	3.02564	1.57477	10.0593	0.00305788	0.0329816	3	4	Up-regulated
Sus_scrofa___LARS1	0.880603	7.48569	10.768	0.00305791	0.0329816	3	4	Up-regulated
Sus_scrofa___ENSSSCG00000040571	1.88751	4.87304	10.7511	0.00306674	0.0330408	3	4	Up-regulated
Sus_scrofa___ARMC8	0.904903	6.50724	10.7576	0.00307143	0.0330552	3	4	Up-regulated
Sus_scrofa___ZMAT1	3.5063	2.36532	10.3703	0.00307422	0.0330671	3	4	Up-regulated
Sus_scrofa___EPM2AIP1	1.61581	5.20166	10.7565	0.00308007	0.033112	3	4	Up-regulated
Sus_scrofa___EML4	1.10956	8.25115	10.7291	0.0031026	0.0332816	3	4	Up-regulated
Sus_scrofa___MFRP	1.5623	3.89815	10.6748	0.00312585	0.0334583	3	4	Up-regulated
Sus_scrofa___PPM1A	1.08129	6.43415	10.7075	0.00313016	0.0334743	3	4	Up-regulated
Sus_scrofa___SLC39A11	0.736386	7.84861	10.704	0.00313208	0.0334743	3	4	Up-regulated
Sus_scrofa___REEP5	1.80141	5.92696	10.6942	0.00314986	0.0335991	3	4	Up-regulated
Sus_scrofa___GDPD2	5.76127	0.849035	11.1334	0.00315433	0.0335991	3	4	Up-regulated
Sus_scrofa___MORF4L2	1.00753	6.19452	10.6858	0.00315685	0.0336078	3	4	Up-regulated
Sus_scrofa___GADD45A	2.25935	3.59956	10.5841	0.00317285	0.0337417	3	4	Up-regulated
Sus_scrofa___C2CD3	1.17463	6.83165	10.6464	0.00320171	0.0340119	3	4	Up-regulated
Sus_scrofa___RRM2B	1.75432	3.6173	10.5398	0.00325583	0.0343589	3	4	Up-regulated
Sus_scrofa___TNFAIP6	1.67549	6.38811	10.6018	0.00325753	0.0343589	3	4	Up-regulated
Sus_scrofa___ENSSSCG00000002351	3.54395	1.97612	10.0118	0.0032605	0.0343589	3	4	Up-regulated
Sus_scrofa___CIAO2A	2.2172	3.76575	10.4781	0.00328972	0.0345929	3	4	Up-regulated
Sus_scrofa___PDIK1L	1.64223	3.34092	10.4365	0.00330866	0.0347181	3	4	Up-regulated
Sus_scrofa___RNF41	1.34514	5.25074	10.556	0.00331876	0.0348056	3	4	Up-regulated
Sus_scrofa___LETMD1	1.81249	3.60701	10.4289	0.00335227	0.0350266	3	4	Up-regulated
Sus_scrofa___KLHL11	1.8072	3.25258	10.269	0.00335783	0.0350661	3	4	Up-regulated
Sus_scrofa___EIF4ENIF1	0.820442	6.5861	10.517	0.0033624	0.0350953	3	4	Up-regulated
Sus_scrofa___ENSSSCG00000031163	3.93599	1.96852	10.198	0.00336492	0.035103	3	4	Up-regulated
Sus_scrofa___SEC61B	1.38855	3.89979	10.4927	0.00337157	0.0351352	3	4	Up-regulated
Sus_scrofa___FOSL2	1.89154	5.90743	10.5092	0.0033791	0.0351395	3	4	Up-regulated
Sus_scrofa___ITGB1	1.49451	9.01832	10.4983	0.0033848	0.0351616	3	4	Up-regulated
Sus_scrofa___SMPDL3A	2.95236	1.81154	9.84835	0.00338701	0.0351661	3	4	Up-regulated
Sus_scrofa___ARF4	0.853668	6.38707	10.4798	0.00341119	0.0353427	3	4	Up-regulated
Sus_scrofa___SRSF1	0.986814	5.89664	10.4773	0.0034176	0.0353906	3	4	Up-regulated
Sus_scrofa___ENSSSCG00000037445	1.25468	4.87303	10.4717	0.0034314	0.0354962	3	4	Up-regulated
Papio_anubis_TOB1	3.25592	1.11585	9.92196	0.00343564	0.0355172	3	4	Up-regulated
Sus_scrofa___PCLO	2.8807	2.00458	10.0536	0.00345298	0.0356447	3	4	Up-regulated
Sus_scrofa___RMI1	2.46574	3.31123	10.1789	0.00347275	0.0358113	3	4	Up-regulated
Sus_scrofa___IFI44L	2.09466	8.04474	10.4278	0.00347677	0.035834	3	4	Up-regulated
Sus_scrofa___KANK2	1.37997	6.63252	10.4258	0.00348263	0.0358757	3	4	Up-regulated
Sus_scrofa___PRKACA	1.7509	4.3955	10.3813	0.00348926	0.0359084	3	4	Up-regulated
Sus_scrofa___AGXT	4.91838	1.17229	9.68572	0.00348945	0.0359084	3	4	Up-regulated
Sus_scrofa___CFAP97	0.865441	5.36072	10.4228	0.00349237	0.0359197	3	4	Up-regulated
Sus_scrofa___MARK1	1.41103	6.6015	10.4056	0.00350887	0.0360518	3	4	Up-regulated
Sus_scrofa___NOB1	1.86293	4.29477	10.3448	0.00351665	0.0360941	3	4	Up-regulated
Sus_scrofa___CD248	2.33111	3.44861	10.2023	0.00352042	0.0361141	3	4	Up-regulated
Sus_scrofa___P4HB	2.16094	4.91693	10.3688	0.00352605	0.036153	3	4	Up-regulated
Sus_scrofa___ACKR2	1.49726	7.96863	10.3719	0.00355136	0.036337	3	4	Up-regulated
Sus_scrofa___RSC1A1	0.909332	6.13518	10.3689	0.00355871	0.0363922	3	4	Up-regulated
Sus_scrofa___ZNF891	1.44127	4.60553	10.3687	0.00356634	0.0364147	3	4	Up-regulated
Sus_scrofa___OLFML2A	1.9446	4.96492	10.3639	0.00357335	0.0364297	3	4	Up-regulated
Sus_scrofa___MAP3K7	0.735954	6.04454	10.3465	0.003589	0.0365703	3	4	Up-regulated
Sus_scrofa___NSMCE1	1.52537	5.19248	10.3513	0.00359156	0.0365776	3	4	Up-regulated
Sus_scrofa___GCLM	1.96827	4.75373	10.3034	0.00361622	0.0367907	3	4	Up-regulated
Sus_scrofa___TSR1	1.62757	4.81793	10.3163	0.0036183	0.0367916	3	4	Up-regulated
Sus_scrofa___OSGIN1	3.03103	3.54146	10.072	0.00362408	0.0368137	3	4	Up-regulated
Sus_scrofa___HDHD5	2.63781	2.10117	9.92841	0.00363781	0.0369152	3	4	Up-regulated
Sus_scrofa___ACSL4	1.09143	8.83785	10.2915	0.00366159	0.0371137	3	4	Up-regulated
Sus_scrofa___RPL22L1	1.78423	4.38532	10.2635	0.00366302	0.0371137	3	4	Up-regulated
Papio_anubis_PABPN1	2.57054	2.60537	9.8621	0.00369341	0.037364	3	4	Up-regulated
Sus_scrofa___FIGN	2.36942	6.44236	10.2657	0.00370227	0.0374153	3	4	Up-regulated
Sus_scrofa___CNP	2.58121	2.99942	9.97984	0.00371146	0.0374506	3	4	Up-regulated
Sus_scrofa___TARBP1	1.18636	6.59419	10.2533	0.00371752	0.0374735	3	4	Up-regulated
Sus_scrofa___EIF2D	1.75678	4.00564	10.1907	0.00374831	0.0377068	3	4	Up-regulated
Sus_scrofa___TMEM170B	1.97758	4.00614	10.1488	0.00379018	0.0380037	3	4	Up-regulated
Sus_scrofa___PSMC4	1.29425	3.73811	10.1898	0.00379303	0.0380037	3	4	Up-regulated
Sus_scrofa___SFT2D3	3.89926	1.42585	9.54664	0.00379488	0.0380037	3	4	Up-regulated
Sus_scrofa___ARSI	3.90512	1.38828	10.2053	0.00379517	0.0380037	3	4	Up-regulated
Sus_scrofa___ENSSSCG00000038708	1.02701	5.92025	10.1914	0.00380945	0.0381114	3	4	Up-regulated
Sus_scrofa___PPP1R15A	2.55762	2.77086	9.87151	0.00381067	0.0381114	3	4	Up-regulated
Sus_scrofa___PNPLA3	2.83528	3.33362	9.94631	0.00381172	0.0381114	3	4	Up-regulated
Sus_scrofa___AIPL1	5.25547	1.49082	9.89555	0.00381965	0.0381639	3	4	Up-regulated
Sus_scrofa___FH	1.47156	4.71699	10.1563	0.00384487	0.038365	3	4	Up-regulated
Sus_scrofa___TMEM106B	1.21852	5.49932	10.1667	0.00384941	0.0383716	3	4	Up-regulated
Sus_scrofa___FAM120A	0.853855	7.60422	10.1468	0.00387032	0.0385054	3	4	Up-regulated
Sus_scrofa___CKAP4	1.75942	3.45781	10.0305	0.00387064	0.0385054	3	4	Up-regulated
Sus_scrofa___PARP12	2.34025	6.4872	10.1459	0.00387621	0.0385223	3	4	Up-regulated
Sus_scrofa___BTD	1.49045	4.63144	10.1363	0.00388605	0.0385614	3	4	Up-regulated
Sus_scrofa___CYP26B1	6.56337	2.56104	10.2829	0.00396198	0.0391573	3	4	Up-regulated
Sus_scrofa___E2F3	1.09568	6.38984	10.0844	0.00396677	0.039185	3	4	Up-regulated
Sus_scrofa___TRAF3	0.844189	7.06878	10.076	0.00397747	0.0392711	3	4	Up-regulated
Sus_scrofa___MAPK12	1.78445	4.88333	10.052	0.00398141	0.039284	3	4	Up-regulated
Sus_scrofa___CLIP1	1.55601	8.29253	10.0592	0.00400263	0.0394405	3	4	Up-regulated
Sus_scrofa___TFAP2A	5.27099	1.0573	10.41	0.00401104	0.0395036	3	4	Up-regulated
Sus_scrofa___RPL35	1.92212	6.07031	10.0389	0.00403949	0.039665	3	4	Up-regulated
Sus_scrofa___NRG2	2.07006	2.85089	9.75357	0.00407981	0.0399813	3	4	Up-regulated
Sus_scrofa___TTLL11	2.562	4.31268	9.75017	0.00411674	0.0402436	3	4	Up-regulated
Sus_scrofa___UBAP2L	0.692849	7.15016	9.98038	0.00412645	0.040286	3	4	Up-regulated
Sus_scrofa___MAP3K8	1.58393	6.64736	9.98262	0.00412724	0.040286	3	4	Up-regulated
Sus_scrofa___DCX	1.14725	5.96395	9.97285	0.00414242	0.0403942	3	4	Up-regulated
Sus_scrofa___CSNK2A2	0.716785	6.34764	9.96692	0.00414968	0.0404082	3	4	Up-regulated
Sus_scrofa___FRA10AC1	1.04538	4.95781	9.97321	0.00415181	0.0404082	3	4	Up-regulated
Sus_scrofa___WDR70	0.706049	7.6282	9.9641	0.00415216	0.0404082	3	4	Up-regulated
Sus_scrofa___ENSSSCG00000016737	1.11774	5.60139	9.9631	0.00416266	0.0404375	3	4	Up-regulated
Sus_scrofa___NMT2	1.26014	6.75183	9.94563	0.00418325	0.0405615	3	4	Up-regulated
Sus_scrofa___COPZ1	1.05753	4.60996	9.95357	0.00418631	0.0405615	3	4	Up-regulated
Sus_scrofa___RPH3A	2.54758	7.48387	9.94084	0.00419578	0.0406334	3	4	Up-regulated
Sus_scrofa___ENSSSCG00000006726	2.56389	1.90423	9.33949	0.00420471	0.0406866	3	4	Up-regulated
Sus_scrofa___SH3BP5L	1.26666	3.86316	9.91181	0.0042054	0.0406866	3	4	Up-regulated
Sus_scrofa___SYN1	4.65202	3.66487	9.59052	0.00421629	0.0407223	3	4	Up-regulated
Sus_scrofa___FOXS1	2.28201	4.69228	9.93081	0.00421638	0.0407223	3	4	Up-regulated
Sus_scrofa___DDX21	1.28282	6.46506	9.92451	0.0042203	0.0407308	3	4	Up-regulated
Sus_scrofa___ENSSSCG00000032073	1.66988	3.86391	9.87667	0.00422809	0.0407661	3	4	Up-regulated
Sus_scrofa___HMGCS1	2.41882	3.99374	9.76273	0.00424349	0.040871	3	4	Up-regulated
Sus_scrofa___ZNF454	2.65862	2.05446	9.54848	0.00424401	0.040871	3	4	Up-regulated
Sus_scrofa___CCNG1	2.6692	2.08733	9.27116	0.00424518	0.040871	3	4	Up-regulated
Sus_scrofa___DPH1	1.0993	4.59939	9.90825	0.00425388	0.0409148	3	4	Up-regulated
Sus_scrofa___PPP2R5E	0.765378	8.02331	9.89076	0.00427131	0.0410224	3	4	Up-regulated
Sus_scrofa___PTPRU	2.5774	4.37809	9.78136	0.00428315	0.0410762	3	4	Up-regulated
Sus_scrofa___LRIF1	1.84052	4.04468	9.87239	0.00429788	0.0411975	3	4	Up-regulated
Sus_scrofa___ATP11C	0.890315	6.87893	9.8739	0.00430037	0.0411977	3	4	Up-regulated
Sus_scrofa___RASD1	4.37291	1.68579	9.32375	0.00430418	0.0411977	3	4	Up-regulated
Sus_scrofa___NIPA2	0.964393	5.46929	9.86505	0.00432437	0.0413309	3	4	Up-regulated
Sus_scrofa___LITAF	0.941404	7.44487	9.85548	0.00433042	0.0413486	3	4	Up-regulated
Sus_scrofa___OGFOD1	1.19581	4.86742	9.85728	0.00434123	0.0414318	3	4	Up-regulated
Sus_scrofa___ST3GAL6	1.10498	7.17371	9.84117	0.00435475	0.0415005	3	4	Up-regulated
Sus_scrofa___SLC16A6	3.0692	1.86027	9.21281	0.00435985	0.0415291	3	4	Up-regulated
Sus_scrofa___ENSSSCG00000043628	4.96526	3.85571	9.87732	0.00437048	0.0415989	3	4	Up-regulated
Sus_scrofa___CCNT1	1.75847	5.94323	9.83619	0.00437139	0.0415989	3	4	Up-regulated
Sus_scrofa___ATF6	0.806173	8.10915	9.81346	0.00440116	0.041833	3	4	Up-regulated
Sus_scrofa___ENSSSCG00000039222	2.02578	5.31397	9.81977	0.00441238	0.0418879	3	4	Up-regulated
Sus_scrofa___SERTAD4	2.34106	3.7048	9.73758	0.00441752	0.0419165	3	4	Up-regulated
Sus_scrofa___ENSSSCG00000016226	1.11019	6.14329	9.79454	0.00443829	0.0420529	3	4	Up-regulated
Sus_scrofa___EIF2B3	0.750303	6.83482	9.77014	0.00447719	0.0422996	3	4	Up-regulated
Sus_scrofa___KCNK6	5.54289	2.08226	9.64903	0.00449532	0.0424303	3	4	Up-regulated
Sus_scrofa___NKRF	2.41037	2.69011	9.48097	0.00451512	0.0425603	3	4	Up-regulated
Sus_scrofa___C2orf76	1.05959	4.66776	9.74269	0.00453577	0.0426701	3	4	Up-regulated
Sus_scrofa___MFSD3	1.7386	3.41296	9.62001	0.00453856	0.0426701	3	4	Up-regulated
Sus_scrofa___ENSSSCG00000040763	1.65388	3.86645	9.67119	0.00454527	0.042677	3	4	Up-regulated
Sus_scrofa___ENSSSCG00000024974	1.97919	6.29899	9.73058	0.0045508	0.0426884	3	4	Up-regulated
Sus_scrofa___SERPINE2	1.59565	9.27913	9.72568	0.0045538	0.0426962	3	4	Up-regulated
Sus_scrofa___ENSSSCG00000031381	0.971365	5.30534	9.72884	0.00456067	0.0426998	3	4	Up-regulated
Sus_scrofa___UBAP2	0.738333	7.79221	9.72081	0.00456267	0.0426998	3	4	Up-regulated
Sus_scrofa___GREB1L	2.63562	3.4562	9.5117	0.00456691	0.0427176	3	4	Up-regulated
Sus_scrofa___EMILIN1	1.36383	5.13595	9.71457	0.00458813	0.0428755	3	4	Up-regulated
Sus_scrofa___ENSSSCG00000001229	2.00075	7.87918	9.7027	0.00459491	0.0429185	3	4	Up-regulated
Sus_scrofa___AKIRIN1	1.05803	5.95386	9.69762	0.00460966	0.0429968	3	4	Up-regulated
Sus_scrofa___ENSSSCG00000010165	5.19886	1.52092	9.31022	0.00460984	0.0429968	3	4	Up-regulated
Sus_scrofa___USP15	0.879537	7.767	9.68967	0.00461829	0.0430289	3	4	Up-regulated
Sus_scrofa___CFAP299	2.28374	5.15926	9.69561	0.00462497	0.0430289	3	4	Up-regulated
Sus_scrofa___DNAJB4	1.33672	6.8512	9.68481	0.00462837	0.0430289	3	4	Up-regulated
Sus_scrofa___SMIM19	1.3199	4.94156	9.6904	0.00462855	0.0430289	3	4	Up-regulated
Sus_scrofa___SPATA2	1.78091	3.34745	9.51216	0.00463459	0.0430594	3	4	Up-regulated
Sus_scrofa___RPL29	1.88442	5.73227	9.68565	0.00463648	0.0430594	3	4	Up-regulated
Sus_scrofa___MAK16	1.17049	4.46676	9.68076	0.00463837	0.0430594	3	4	Up-regulated
Sus_scrofa___MLKL	0.916258	5.2287	9.67973	0.00464967	0.0431439	3	4	Up-regulated
Sus_scrofa___SUPT4H1	1.34297	3.77436	9.65026	0.00465585	0.043181	3	4	Up-regulated
Sus_scrofa___GCN1	0.922605	6.29404	9.66777	0.00466177	0.043214	3	4	Up-regulated
Sus_scrofa___MYBBP1A	1.32724	4.34955	9.65105	0.00468209	0.0433331	3	4	Up-regulated
Sus_scrofa___CLINT1	0.872085	7.23256	9.65412	0.00468323	0.0433331	3	4	Up-regulated
Sus_scrofa___FADD	2.01199	2.65732	9.36641	0.00470236	0.0434489	3	4	Up-regulated
Sus_scrofa___CNN2	2.25935	3.38934	9.4917	0.00471176	0.043495	3	4	Up-regulated
Sus_scrofa___YPEL2	2.10455	7.07827	9.63217	0.00472633	0.0435888	3	4	Up-regulated
Sus_scrofa___CAB39	0.946923	6.92071	9.62974	0.00472863	0.0435895	3	4	Up-regulated
Sus_scrofa___ACKR4	1.84287	4.7524	9.5931	0.00474431	0.0437136	3	4	Up-regulated
Sus_scrofa___USP49	1.59727	4.39516	9.59551	0.00475344	0.0437773	3	4	Up-regulated
Sus_scrofa___SRRM4	1.07635	5.93025	9.61262	0.00476353	0.0438301	3	4	Up-regulated
Sus_scrofa___ACAA2	1.68824	3.85758	9.5965	0.0047659	0.0438301	3	4	Up-regulated
Sus_scrofa___LIX1L	2.45846	3.55013	9.42491	0.00476805	0.0438301	3	4	Up-regulated
Sus_scrofa___TBC1D32	1.73252	6.75447	9.60464	0.00477658	0.0438881	3	4	Up-regulated
Sus_scrofa___G6PD	1.54556	4.13152	9.58179	0.0047863	0.0439203	3	4	Up-regulated
Sus_scrofa___COL8A1	1.89312	11.265	9.59652	0.004789	0.0439203	3	4	Up-regulated
Sus_scrofa___AAR2	1.81728	3.96376	9.50753	0.00484047	0.0443306	3	4	Up-regulated
Sus_scrofa___FGFR1	1.00696	8.00527	9.55496	0.0048678	0.0445395	3	4	Up-regulated
Sus_scrofa___PSMD7	1.30362	4.80616	9.56143	0.0048778	0.0446103	3	4	Up-regulated
Sus_scrofa___ENSSSCG00000033241	5.57602	1.98059	9.17622	0.00488629	0.0446672	3	4	Up-regulated
Sus_scrofa___ENSSSCG00000005663	2.16343	3.77409	9.46675	0.00489774	0.0447345	3	4	Up-regulated
Sus_scrofa___THUMPD1	1.03861	5.55055	9.53826	0.00491056	0.0447786	3	4	Up-regulated
Sus_scrofa___CLTB	1.29086	5.51913	9.5387	0.00491209	0.0447786	3	4	Up-regulated
Sus_scrofa___HSF2	1.20789	5.30742	9.5374	0.0049158	0.0447917	3	4	Up-regulated
Sus_scrofa___ENSSSCG00000004945	1.3609	5.21153	9.52944	0.00493401	0.0448736	3	4	Up-regulated
Sus_scrofa___DUSP6	1.74753	4.59389	9.52553	0.00493616	0.0448736	3	4	Up-regulated
Sus_scrofa___C11orf68	2.39461	2.51595	9.2324	0.0049493	0.0449557	3	4	Up-regulated
Sus_scrofa___PRDX1	1.89489	4.24868	9.45382	0.00495619	0.0449727	3	4	Up-regulated
Sus_scrofa___PDCD11	1.47906	4.71042	9.46737	0.00501141	0.0453903	3	4	Up-regulated
Sus_scrofa___NETO2	2.36082	3.72034	9.24982	0.00502204	0.0454657	3	4	Up-regulated
Sus_scrofa___RUNX2	1.81258	7.54253	9.45891	0.00505581	0.0456464	3	4	Up-regulated
Sus_scrofa___ENSSSCG00000000576	1.76085	3.99375	9.43824	0.00508795	0.045852	3	4	Up-regulated
Sus_scrofa___MYLK	2.3728	6.83317	9.44132	0.00509272	0.045874	3	4	Up-regulated
Sus_scrofa___CCDC66	0.924056	6.55292	9.4293	0.00511649	0.046046	3	4	Up-regulated
Sus_scrofa___PLEKHA4	1.31591	5.69213	9.42237	0.00513824	0.0461997	3	4	Up-regulated
Sus_scrofa___NPFFR2	5.53111	1.77055	9.0725	0.00515683	0.0463246	3	4	Up-regulated
Sus_scrofa___CHPF	2.71778	3.16142	9.1507	0.00515932	0.0463259	3	4	Up-regulated
Sus_scrofa___HSPH1	1.42515	5.53302	9.4093	0.0051675	0.0463782	3	4	Up-regulated
Sus_scrofa___AKR1B1	0.850151	6.75151	9.40022	0.00517439	0.0464189	3	4	Up-regulated
Sus_scrofa___MID1IP1	3.0155	1.73361	8.94366	0.00517755	0.0464261	3	4	Up-regulated
Sus_scrofa___SLC15A1	3.06888	1.54947	8.9547	0.0051845	0.0464674	3	4	Up-regulated
Sus_scrofa___ENSSSCG00000007692	1.48412	5.255	9.40184	0.00519377	0.0465082	3	4	Up-regulated
Sus_scrofa___LIN52	2.14586	3.5845	9.20143	0.00521057	0.0465952	3	4	Up-regulated
Sus_scrofa___NAA15	0.804572	7.22683	9.38012	0.00521476	0.0465977	3	4	Up-regulated
Sus_scrofa___BCO1	4.03427	3.05711	9.21726	0.00521558	0.0465977	3	4	Up-regulated
Sus_scrofa___ECM2	1.54189	7.20187	9.37149	0.00523373	0.0467176	3	4	Up-regulated
Sus_scrofa___SFXN4	1.08295	5.67381	9.36732	0.00524993	0.0467924	3	4	Up-regulated
Sus_scrofa___TMEM17	4.02963	1.55142	8.85985	0.00525161	0.0467924	3	4	Up-regulated
Sus_scrofa___AAK1	1.31082	7.67567	9.35824	0.00525954	0.0468419	3	4	Up-regulated
Sus_scrofa___FLNA	1.56524	6.57534	9.35936	0.00526265	0.0468485	3	4	Up-regulated
Sus_scrofa___CTNNA1	0.666448	8.59721	9.35415	0.00526742	0.046869	3	4	Up-regulated
Sus_scrofa___RCC1	3.06519	2.71274	9.15897	0.00527839	0.046904	3	4	Up-regulated
Sus_scrofa___PDLIM1	1.78105	5.99919	9.34305	0.00529851	0.0470616	3	4	Up-regulated
Sus_scrofa___NKAIN1	4.25344	3.15038	9.11083	0.00532477	0.0472735	3	4	Up-regulated
Sus_scrofa___GATB	1.86842	3.90393	9.30639	0.00532739	0.0472755	3	4	Up-regulated
Sus_scrofa___ZNF3	2.37715	2.53752	9.02073	0.00534864	0.0474427	3	4	Up-regulated
Sus_scrofa___MRPL12	1.10735	5.24563	9.32036	0.00535339	0.0474483	3	4	Up-regulated
Sus_scrofa___BCL2A1	2.03159	2.61059	8.89749	0.00535517	0.0474483	3	4	Up-regulated
Sus_scrofa___THBD	3.14243	2.29381	9.06881	0.00538852	0.0476465	3	4	Up-regulated
Sus_scrofa___TSPAN3	1.38985	5.28711	9.30105	0.00539516	0.0476838	3	4	Up-regulated
Sus_scrofa___SPARC	0.987212	7.32531	9.28685	0.00541006	0.0477941	3	4	Up-regulated
Sus_scrofa___ISG20	5.65966	1.37952	8.86096	0.00541583	0.0478023	3	4	Up-regulated
Sus_scrofa___ENSSSCG00000006213	3.05325	2.38588	9.06375	0.00542236	0.0478385	3	4	Up-regulated
Sus_scrofa___NCSTN	1.33656	4.24686	9.25728	0.00546025	0.0480623	3	4	Up-regulated
Sus_scrofa___ADCY10	3.38967	3.0807	9.05597	0.00546275	0.0480623	3	4	Up-regulated
Sus_scrofa___JMJD4	1.54231	3.425	9.20753	0.00547453	0.0481266	3	4	Up-regulated
Sus_scrofa___PHKA2	2.79329	2.90072	8.88001	0.00550522	0.0483103	3	4	Up-regulated
Sus_scrofa___SYT12	3.3662	2.0869	8.97539	0.00551263	0.0483538	3	4	Up-regulated
Sus_scrofa___SYNRG	1.2428	6.44065	9.23272	0.00552985	0.0484002	3	4	Up-regulated
Sus_scrofa___JKAMP	1.13796	4.87196	9.24156	0.00553019	0.0484002	3	4	Up-regulated
Sus_scrofa___ENSSSCG00000013091	4.20605	0.662971	9.11377	0.00554924	0.0485239	3	4	Up-regulated
Sus_scrofa___PSMB8	2.29566	4.14128	9.21328	0.0055622	0.0486156	3	4	Up-regulated
Sus_scrofa___PTGIS	0.963441	9.49775	9.21012	0.00557619	0.0486865	3	4	Up-regulated
Sus_scrofa___GATA6	2.28414	5.02541	9.2072	0.00557772	0.0486865	3	4	Up-regulated
Sus_scrofa___FSD1L	0.868156	6.69683	9.20703	0.00558563	0.0487126	3	4	Up-regulated
Sus_scrofa___GFPT1	0.928932	6.54612	9.20618	0.0055881	0.0487126	3	4	Up-regulated
Sus_scrofa___SLC33A1	0.921779	6.35076	9.20194	0.00559772	0.0487631	3	4	Up-regulated
Sus_scrofa___MDM2	0.807798	7.14715	9.19852	0.00560273	0.0487631	3	4	Up-regulated
Sus_scrofa___PHF21B	2.69492	3.44141	9.00982	0.00560379	0.0487631	3	4	Up-regulated
Sus_scrofa___LRRFIP2	1.44959	6.4304	9.19385	0.00561726	0.0488157	3	4	Up-regulated
Sus_scrofa___OPA1	0.768392	6.30999	9.19016	0.00562409	0.0488163	3	4	Up-regulated
Sus_scrofa___ZBTB24	1.31409	3.80076	9.14641	0.0056321	0.0488586	3	4	Up-regulated
Sus_scrofa___CBR3	1.91806	3.46937	9.11993	0.00563621	0.048862	3	4	Up-regulated
Sus_scrofa___SPIRE1	1.60682	5.89299	9.1836	0.00564709	0.0489241	3	4	Up-regulated
Sus_scrofa___MED24	1.98202	4.55726	9.16442	0.00566663	0.0490719	3	4	Up-regulated
Sus_scrofa___GFM1	1.53746	5.01837	9.17735	0.00567333	0.0491083	3	4	Up-regulated
Sus_scrofa___FOSB	5.30154	2.99637	9.03481	0.00568627	0.0491556	3	4	Up-regulated
Sus_scrofa___ENSSSCG00000026446	2.16797	2.83752	8.90168	0.00570778	0.0492767	3	4	Up-regulated
Sus_scrofa___BABAM2	0.70807	8.74666	9.14173	0.00572976	0.0494017	3	4	Up-regulated
Sus_scrofa___MFSD12	1.48019	4.24148	9.13425	0.00575325	0.0495609	3	4	Up-regulated
Sus_scrofa___FPGS	1.95303	3.73517	8.98339	0.00577832	0.0497117	3	4	Up-regulated
Sus_scrofa___ENSSSCG00000031661	4.46505	3.50284	8.99614	0.00580607	0.0498635	3	4	Up-regulated
Sus_scrofa___SPARCL1	-3.5491	8.68449	95.9516	5.17361e-10	3.82283e-06	3	4	Down-regulated
Sus_scrofa___SCN7A	-5.10544	4.32308	79.7727	1.89549e-09	7.58648e-06	3	4	Down-regulated
Sus_scrofa___TMEFF2	-5.45248	7.92165	82.4963	2.30744e-09	7.58648e-06	3	4	Down-regulated
Sus_scrofa___LEPR	-5.61497	3.5375	63.4019	3.30993e-09	9.32785e-06	3	4	Down-regulated
Sus_scrofa___ABCA8	-4.00592	9.45012	62.281	3.14302e-08	4.67431e-05	3	4	Down-regulated
Sus_scrofa___ENSSSCG00000035525	-3.96765	4.43415	58.7586	5.08629e-08	4.95398e-05	3	4	Down-regulated
Sus_scrofa___NOX5	-5.30565	4.3978	51.5516	6.26521e-08	5.37365e-05	3	4	Down-regulated
Sus_scrofa___DOCK2	-5.50479	3.49618	47.2786	6.89361e-08	5.66626e-05	3	4	Down-regulated
Sus_scrofa___SLC6A20	-3.78351	4.86826	53.0546	1.34089e-07	8.77306e-05	3	4	Down-regulated
Sus_scrofa___TMOD2	-2.85378	4.5826	51.7955	1.65502e-07	9.6025e-05	3	4	Down-regulated
Sus_scrofa___SESTD1	-1.89342	9.39219	50.7308	1.89167e-07	0.00010662	3	4	Down-regulated
Sus_scrofa___ENSSSCG00000032896	-4.66395	3.50721	40.6047	3.37628e-07	0.000169925	3	4	Down-regulated
Sus_scrofa___PRKCB	-2.58849	4.93228	47.3572	3.52545e-07	0.000169925	3	4	Down-regulated
Sus_scrofa___ADGRV1	-3.17426	4.54644	47.2083	3.54876e-07	0.000169925	3	4	Down-regulated
Sus_scrofa___ALDH1A1	-4.05767	5.92522	46.6841	3.86306e-07	0.000169925	3	4	Down-regulated
Sus_scrofa___TNS3	-3.11644	7.30177	45.6873	4.5408e-07	0.000186617	3	4	Down-regulated
Sus_scrofa___ENSSSCG00000036029	-6.82333	1.67515	40.1596	4.81296e-07	0.000190282	3	4	Down-regulated
Sus_scrofa___MPP2	-5.01455	2.91496	39.1232	5.44902e-07	0.000202134	3	4	Down-regulated
Sus_scrofa___SEMA6D	-2.81926	6.54982	44.4776	5.66833e-07	0.000202134	3	4	Down-regulated
Sus_scrofa___CA10	-3.1111	7.48118	44.2294	5.93227e-07	0.000202134	3	4	Down-regulated
Sus_scrofa___RALGPS2	-2.60582	6.08624	43.912	6.30354e-07	0.000207913	3	4	Down-regulated
Sus_scrofa___ANGPTL1	-3.82508	3.62183	42.2723	6.81726e-07	0.000207913	3	4	Down-regulated
Sus_scrofa___ENSSSCG00000040719	-4.12465	3.36486	40.5446	7.18386e-07	0.000207913	3	4	Down-regulated
Sus_scrofa___GRID1	-3.18622	6.45679	43.1622	7.24068e-07	0.000207913	3	4	Down-regulated
Sus_scrofa___KLHL13	-3.6358	6.62873	43.0779	7.37939e-07	0.000207913	3	4	Down-regulated
Sus_scrofa___ENSSSCG00000006156	-2.18012	5.84855	42.4934	8.21662e-07	0.00021904	3	4	Down-regulated
Sus_scrofa___UNKL	-1.82	7.07973	42.3278	8.4239e-07	0.000221377	3	4	Down-regulated
Sus_scrofa___DCHS2	-3.58581	4.29294	41.7141	9.56878e-07	0.000242004	3	4	Down-regulated
Sus_scrofa___YTHDC2	-1.34195	7.40567	41.5103	9.8356e-07	0.000243798	3	4	Down-regulated
Sus_scrofa___WNT5A	-3.01645	3.84403	41.3104	1.00906e-06	0.000243798	3	4	Down-regulated
Sus_scrofa___PLCB4	-3.24456	9.43228	41.2258	1.03812e-06	0.000243798	3	4	Down-regulated
Sus_scrofa___CNTN3	-2.9915	7.73606	40.993	1.08641e-06	0.000252136	3	4	Down-regulated
Sus_scrofa___VSIG10	-2.2538	5.54797	40.4311	1.22385e-06	0.000275785	3	4	Down-regulated
Sus_scrofa___STON2	-2.2146	8.21878	40.3487	1.23025e-06	0.000275785	3	4	Down-regulated
Sus_scrofa___SESN3	-2.94035	6.71848	40.269	1.25303e-06	0.000277736	3	4	Down-regulated
Sus_scrofa___DISC1	-1.31289	7.84308	39.9094	1.3406e-06	0.000284367	3	4	Down-regulated
Sus_scrofa___CDK5RAP2	-2.41263	5.89371	39.1058	1.58295e-06	0.000321926	3	4	Down-regulated
Sus_scrofa___ENSSSCG00000028944	-4.5527	4.04931	37.3036	1.80223e-06	0.000355591	3	4	Down-regulated
Sus_scrofa___ENSSSCG00000031640	-8.7274	2.89613	35.0665	1.80256e-06	0.000355591	3	4	Down-regulated
Sus_scrofa___ENSSSCG00000048841	-4.42323	2.3276	31.6238	1.88325e-06	0.000361335	3	4	Down-regulated
Sus_scrofa___ENSSSCG00000014314	-3.51811	3.79767	37.7481	1.90494e-06	0.000361335	3	4	Down-regulated
Sus_scrofa___SGSM1	-2.65276	5.69205	38.099	1.94702e-06	0.000362348	3	4	Down-regulated
Sus_scrofa___ABCA9	-2.62159	8.03221	37.7393	2.06756e-06	0.000379912	3	4	Down-regulated
Sus_scrofa___ENSSSCG00000022039	-2.12764	4.95612	37.7763	2.09917e-06	0.000379912	3	4	Down-regulated
Sus_scrofa___ENSSSCG00000023479	-2.77005	6.43825	37.5434	2.16303e-06	0.000386442	3	4	Down-regulated
Sus_scrofa___SKAP1	-3.44728	3.77526	37.0746	2.17444e-06	0.000386442	3	4	Down-regulated
Sus_scrofa___ARHGAP15	-3.08069	4.3126	37.4076	2.21423e-06	0.000390001	3	4	Down-regulated
Sus_scrofa___JAM2	-2.18279	5.54767	37.2727	2.29984e-06	0.000400283	3	4	Down-regulated
Sus_scrofa___CAMKK2	-2.75855	5.9015	37.2327	2.31319e-06	0.000400283	3	4	Down-regulated
Sus_scrofa___MTUS2	-4.99936	6.97685	36.9929	2.46209e-06	0.000417927	3	4	Down-regulated
Sus_scrofa___WRAP73	-1.75282	5.54003	36.8357	2.51163e-06	0.00041989	3	4	Down-regulated
Sus_scrofa___REPS2	-1.86067	6.20384	36.7222	2.55427e-06	0.00042343	3	4	Down-regulated
Sus_scrofa___HPS3	-1.95406	5.44914	36.3832	2.75925e-06	0.000449848	3	4	Down-regulated
Sus_scrofa___FRMD4A	-1.44265	9.06309	35.7147	3.14067e-06	0.000489535	3	4	Down-regulated
Sus_scrofa___BMF	-4.18951	3.39843	33.4151	3.44517e-06	0.000526844	3	4	Down-regulated
Sus_scrofa___HMGCLL1	-4.84978	3.19536	32.4254	3.59681e-06	0.000545802	3	4	Down-regulated
Sus_scrofa___NQO2	-2.21135	5.08948	34.9697	3.74383e-06	0.000551407	3	4	Down-regulated
Sus_scrofa___MTHFR	-2.5165	4.49766	35.0243	3.74555e-06	0.000551407	3	4	Down-regulated
Sus_scrofa___ARHGAP21	-1.12983	8.79041	34.6203	3.96195e-06	0.000574686	3	4	Down-regulated
Sus_scrofa___RPS6KA5	-1.96268	6.5732	34.3988	4.16402e-06	0.000599589	3	4	Down-regulated
Sus_scrofa___MYL7	-6.08527	4.20427	29.2341	4.4004e-06	0.000615651	3	4	Down-regulated
Sus_scrofa___CD302	-2.65978	5.59994	33.9016	4.67112e-06	0.000639912	3	4	Down-regulated
Sus_scrofa___FNDC5	-2.85482	3.43061	32.8744	4.81459e-06	0.00065053	3	4	Down-regulated
Sus_scrofa___TMEM272	-3.7859	2.35971	27.4469	5.00236e-06	0.000668742	3	4	Down-regulated
Sus_scrofa___VAMP5	-1.90322	5.60112	33.5662	5.01718e-06	0.000668742	3	4	Down-regulated
Sus_scrofa___XKR8	-2.97121	2.90015	30.6805	5.23947e-06	0.000689061	3	4	Down-regulated
Sus_scrofa___ADAM28	-6.52335	1.80458	29.0401	5.50955e-06	0.000707504	3	4	Down-regulated
Sus_scrofa___UACA	-1.69912	8.66462	33.0908	5.52317e-06	0.000707504	3	4	Down-regulated
Sus_scrofa___TOP3A	-2.21067	7.54883	32.9645	5.68152e-06	0.000723093	3	4	Down-regulated
Sus_scrofa___ULK2	-1.2448	8.30668	32.8867	5.7777e-06	0.00073062	3	4	Down-regulated
Sus_scrofa___ENSSSCG00000040956	-1.9433	6.25229	32.6705	6.08374e-06	0.000750087	3	4	Down-regulated
Sus_scrofa___ARRB2	-3.28976	2.61285	29.4862	6.47177e-06	0.000778467	3	4	Down-regulated
Sus_scrofa___NTN5	-3.1078	2.91597	30.2675	6.62893e-06	0.000785658	3	4	Down-regulated
Sus_scrofa___TFDP2	-1.14136	8.23436	32.2592	6.64218e-06	0.000785658	3	4	Down-regulated
Sus_scrofa___PRRC2B	-1.10018	8.42537	32.2531	6.65103e-06	0.000785658	3	4	Down-regulated
Sus_scrofa___PRDM6	-2.71237	6.10747	31.8302	7.35882e-06	0.00084037	3	4	Down-regulated
Sus_scrofa___FYB1	-2.95559	3.13215	28.9732	7.43106e-06	0.000842486	3	4	Down-regulated
Sus_scrofa___KAZN	-2.61454	9.26663	31.3937	8.07188e-06	0.00088025	3	4	Down-regulated
Sus_scrofa___SNCAIP	-2.65765	4.53764	31.3997	8.29016e-06	0.000893661	3	4	Down-regulated
Sus_scrofa___ARHGAP25	-2.99239	3.69984	30.9864	8.46078e-06	0.000902194	3	4	Down-regulated
Sus_scrofa___SHMT1	-3.99826	6.21837	31.0563	8.81548e-06	0.000929963	3	4	Down-regulated
Sus_scrofa___TNRC18	-1.43896	6.62765	30.9413	8.95976e-06	0.000932669	3	4	Down-regulated
Sus_scrofa___PSAT1	-3.20446	4.22755	30.4459	9.43959e-06	0.000945253	3	4	Down-regulated
Sus_scrofa___PIK3R5	-2.86627	2.64584	26.8815	9.97135e-06	0.000975065	3	4	Down-regulated
Sus_scrofa___EZH1	-1.98404	6.60043	30.4725	9.98445e-06	0.000975065	3	4	Down-regulated
Sus_scrofa___SYT9	-2.45623	4.68935	30.5686	1.01018e-05	0.000976852	3	4	Down-regulated
Sus_scrofa___SLC46A3	-3.18493	6.56132	30.2949	1.04316e-05	0.000990535	3	4	Down-regulated
Sus_scrofa___EEF1A2	-8.98035	3.16729	27.0343	1.08075e-05	0.00102009	3	4	Down-regulated
Sus_scrofa___FNBP1	-1.23089	7.75582	29.986	1.1162e-05	0.00103865	3	4	Down-regulated
Sus_scrofa___ABCG2	-1.47294	7.36225	29.9448	1.12725e-05	0.00104165	3	4	Down-regulated
Sus_scrofa___ENSSSCG00000029771	-1.86858	7.99011	29.7959	1.16686e-05	0.00105108	3	4	Down-regulated
Sus_scrofa___ENSSSCG00000041213	-4.11054	5.42844	29.7216	1.19989e-05	0.00107404	3	4	Down-regulated
Sus_scrofa___ENSSSCG00000034866	-4.13808	2.76613	26.092	1.2208e-05	0.00107512	3	4	Down-regulated
Sus_scrofa___ABI3BP	-3.76259	8.23617	29.4075	1.27865e-05	0.00111119	3	4	Down-regulated
Sus_scrofa___FAM200A	-2.48312	4.39134	29.3961	1.30753e-05	0.0011313	3	4	Down-regulated
Sus_scrofa___EPHA3	-2.72793	6.56717	29.2821	1.31965e-05	0.00113304	3	4	Down-regulated
Sus_scrofa___SNRNP70	-1.58478	8.5868	29.1252	1.36642e-05	0.0011523	3	4	Down-regulated
Sus_scrofa___CREB5	-1.52032	9.6714	29.1057	1.37263e-05	0.0011523	3	4	Down-regulated
Sus_scrofa___ZDHHC14	-2.69366	5.80674	29.1262	1.37736e-05	0.0011523	3	4	Down-regulated
Sus_scrofa___AKAP8	-1.51208	6.18037	29.0978	1.37853e-05	0.0011523	3	4	Down-regulated
Sus_scrofa___KDM2B	-1.70543	5.90045	29.0199	1.40614e-05	0.0011655	3	4	Down-regulated
Sus_scrofa___LCP2	-4.31951	2.67295	24.891	1.42546e-05	0.00117217	3	4	Down-regulated
Sus_scrofa___SLC22A4	-3.83996	2.82516	27.0681	1.47342e-05	0.00120607	3	4	Down-regulated
Sus_scrofa___CDK9	-1.59137	6.54557	28.6603	1.5285e-05	0.00123577	3	4	Down-regulated
Sus_scrofa___MORC4	-1.30432	7.12153	28.5048	1.5852e-05	0.00126604	3	4	Down-regulated
Sus_scrofa___ABCA6	-2.79633	9.66602	28.4577	1.60228e-05	0.00127453	3	4	Down-regulated
Sus_scrofa___PRPSAP1	-1.90716	5.05056	28.4597	1.62403e-05	0.00127639	3	4	Down-regulated
Sus_scrofa___SLC25A45	-3.72077	1.91328	23.6201	1.66656e-05	0.00130461	3	4	Down-regulated
Sus_scrofa___CD34	-1.83371	6.93976	28.2492	1.68637e-05	0.00131378	3	4	Down-regulated
Sus_scrofa___ENSSSCG00000027790	-2.89459	4.8761	28.289	1.69809e-05	0.00131378	3	4	Down-regulated
Sus_scrofa___NPR2	-1.62887	5.35885	28.1662	1.73286e-05	0.00132175	3	4	Down-regulated
Sus_scrofa___ULK4	-1.52176	6.85661	28.1107	1.74357e-05	0.00132175	3	4	Down-regulated
Sus_scrofa___GPR137B	-1.58954	4.99393	28.1538	1.74958e-05	0.00132175	3	4	Down-regulated
Sus_scrofa___FRMD3	-2.75629	8.5081	28.0685	1.76021e-05	0.00132175	3	4	Down-regulated
Sus_scrofa___SLC6A4	-4.41982	5.41497	28.1122	1.76215e-05	0.00132175	3	4	Down-regulated
Sus_scrofa___CAPN5	-3.06069	4.07655	28.0199	1.80578e-05	0.00134096	3	4	Down-regulated
Sus_scrofa___ACSF2	-1.54568	6.55466	27.8306	1.86682e-05	0.00137414	3	4	Down-regulated
Sus_scrofa___RADIL	-2.17122	6.09927	27.8032	1.88401e-05	0.00138048	3	4	Down-regulated
Sus_scrofa___GALNT16	-3.39513	6.33261	27.6126	1.97872e-05	0.00142982	3	4	Down-regulated
Sus_scrofa___ENSSSCG00000016085	-2.34647	4.89354	27.6087	1.99729e-05	0.00143798	3	4	Down-regulated
Sus_scrofa___NCOA7	-1.54047	7.53082	27.5321	2.00611e-05	0.00143907	3	4	Down-regulated
Sus_scrofa___CDO1	-3.27601	4.27285	27.4324	2.07053e-05	0.0014799	3	4	Down-regulated
Sus_scrofa___PNPO	-1.99618	5.41185	27.2817	2.15248e-05	0.00152127	3	4	Down-regulated
Sus_scrofa___IFT140	-1.54991	5.8596	27.2371	2.16421e-05	0.00152127	3	4	Down-regulated
Sus_scrofa___LRRC36	-3.58074	2.63219	24.797	2.20427e-05	0.00153653	3	4	Down-regulated
Sus_scrofa___RHPN2	-3.09591	4.59588	27.2307	2.22112e-05	0.00154282	3	4	Down-regulated
Sus_scrofa___ACTC1	-9.13416	3.26313	26.1091	2.25487e-05	0.00154732	3	4	Down-regulated
Sus_scrofa___TNXB	-2.94034	8.6096	27.0488	2.25897e-05	0.00154732	3	4	Down-regulated
Sus_scrofa___HSDL1	-2.29264	3.08111	26.3034	2.35184e-05	0.00159922	3	4	Down-regulated
Sus_scrofa___KIAA1109	-1.22101	7.36031	26.6907	2.46917e-05	0.00165116	3	4	Down-regulated
Sus_scrofa___ADCY7	-2.10958	5.11503	26.7247	2.48278e-05	0.00165391	3	4	Down-regulated
Sus_scrofa___MAL	-3.50145	2.83201	23.8	2.50681e-05	0.00165391	3	4	Down-regulated
Sus_scrofa___BMP5	-3.72997	4.19064	24.8482	2.57578e-05	0.0016632	3	4	Down-regulated
Sus_scrofa___BIN2	-5.50194	2.32034	23.5293	2.65694e-05	0.00169623	3	4	Down-regulated
Sus_scrofa___PDE4D	-1.96468	9.64124	26.2833	2.73301e-05	0.00173357	3	4	Down-regulated
Sus_scrofa___GLE1	-1.53777	4.94659	26.2407	2.79918e-05	0.00175369	3	4	Down-regulated
Sus_scrofa___RNF180	-2.10548	8.11477	26.1831	2.80322e-05	0.00175369	3	4	Down-regulated
Sus_scrofa___PCDH9	-2.28169	7.65341	26.1752	2.80917e-05	0.00175369	3	4	Down-regulated
Sus_scrofa___TNS2	-1.27851	6.92648	26.1251	2.84592e-05	0.00176775	3	4	Down-regulated
Sus_scrofa___CDH7	-3.8236	3.16325	25.1176	2.85444e-05	0.00176775	3	4	Down-regulated
Sus_scrofa___SH3RF2	-2.25869	5.06792	26.1162	2.89088e-05	0.00177933	3	4	Down-regulated
Sus_scrofa___ENSSSCG00000038540	-3.22429	4.16097	26.0138	2.93494e-05	0.00179254	3	4	Down-regulated
Sus_scrofa___A2M	-4.6029	1.81068	22.8551	2.94411e-05	0.00179254	3	4	Down-regulated
Sus_scrofa___SYNE2	-1.41976	7.86119	25.9608	2.9648e-05	0.00179958	3	4	Down-regulated
Sus_scrofa___CSF1R	-3.90734	3.10744	22.5651	3.00023e-05	0.00180996	3	4	Down-regulated
Sus_scrofa___TTC21B	-1.21341	7.65301	25.6519	3.20654e-05	0.00189876	3	4	Down-regulated
Sus_scrofa___ZNF879	-1.48908	5.14207	25.6413	3.24734e-05	0.00190411	3	4	Down-regulated
Sus_scrofa___ADAM22	-3.16798	7.3512	25.5889	3.26378e-05	0.00190487	3	4	Down-regulated
Sus_scrofa___SORCS1	-3.65023	3.39313	24.8826	3.28737e-05	0.00191298	3	4	Down-regulated
Sus_scrofa___IRAG2	-2.79062	3.71981	25.4098	3.38863e-05	0.0019546	3	4	Down-regulated
Sus_scrofa___DEPDC1B	-1.60623	5.54118	25.3112	3.51871e-05	0.00201199	3	4	Down-regulated
Sus_scrofa___CCP110	-1.88843	5.15421	25.2622	3.58343e-05	0.00204063	3	4	Down-regulated
Sus_scrofa___ENSSSCG00000039807	-2.89424	2.38248	23.219	3.58948e-05	0.00204063	3	4	Down-regulated
Sus_scrofa___ITIH5	-2.72393	8.18849	25.1252	3.66907e-05	0.00207988	3	4	Down-regulated
Sus_scrofa___EFHC1	-1.62912	5.43646	25.0703	3.75236e-05	0.00211494	3	4	Down-regulated
Sus_scrofa___PLSCR5	-3.57141	2.01883	21.3146	3.79021e-05	0.00213018	3	4	Down-regulated
Sus_scrofa___CEP112	-1.29558	7.78492	24.8835	3.90508e-05	0.00217001	3	4	Down-regulated
Sus_scrofa___RAVER2	-2.20057	4.47937	24.9154	3.9643e-05	0.00219354	3	4	Down-regulated
Sus_scrofa___PSIP1	-1.2783	6.50006	24.7701	4.02514e-05	0.00220566	3	4	Down-regulated
Sus_scrofa___ENSSSCG00000007944	-2.45925	4.01744	24.6749	4.19412e-05	0.00226678	3	4	Down-regulated
Sus_scrofa___RGS1	-4.45354	2.32052	23.714	4.33154e-05	0.00232829	3	4	Down-regulated
Sus_scrofa___BAZ2B	-1.18237	9.27233	24.4445	4.37581e-05	0.00234569	3	4	Down-regulated
Sus_scrofa___RIN2	-1.73354	8.56886	24.3868	4.44256e-05	0.0023686	3	4	Down-regulated
Sus_scrofa___CEP290	-1.44879	6.50095	24.352	4.48858e-05	0.00238669	3	4	Down-regulated
Sus_scrofa___CCDC28B	-2.72241	3.78792	24.2197	4.62234e-05	0.00243742	3	4	Down-regulated
Sus_scrofa___TSPAN11	-3.03809	4.34592	24.2992	4.62992e-05	0.00243742	3	4	Down-regulated
Sus_scrofa___NEDD4	-1.29515	7.40942	24.2279	4.63231e-05	0.00243742	3	4	Down-regulated
Sus_scrofa___MME	-4.26956	6.96896	24.2098	4.67252e-05	0.00244496	3	4	Down-regulated
Sus_scrofa___RPIA	-2.01429	4.56889	24.1534	4.81374e-05	0.00249932	3	4	Down-regulated
Sus_scrofa___DUSP11	-1.18348	6.86979	24.0824	4.81442e-05	0.00249932	3	4	Down-regulated
Sus_scrofa___C20orf194	-1.16025	8.12383	23.8632	5.09821e-05	0.00261227	3	4	Down-regulated
Sus_scrofa___BRD3	-1.45892	6.34123	23.7536	5.25536e-05	0.00265231	3	4	Down-regulated
Sus_scrofa___FARP2	-1.44418	6.22548	23.7521	5.25885e-05	0.00265231	3	4	Down-regulated
Sus_scrofa___DOCK8	-2.69093	3.71215	23.3704	5.26133e-05	0.00265231	3	4	Down-regulated
Sus_scrofa___CRTC2	-2.02642	3.7148	23.7343	5.27047e-05	0.00265231	3	4	Down-regulated
Sus_scrofa___RIMKLB	-2.27533	5.39419	23.7586	5.29366e-05	0.0026572	3	4	Down-regulated
Sus_scrofa___ENSSSCG00000000367	-2.0319	4.12788	23.7409	5.4035e-05	0.00265823	3	4	Down-regulated
Sus_scrofa___TBCCD1	-1.18543	5.14004	23.6547	5.43342e-05	0.00266629	3	4	Down-regulated
Sus_scrofa___IL10RA	-4.8487	3.08124	21.3491	5.45108e-05	0.00266832	3	4	Down-regulated
Sus_scrofa___PDGFRL	-1.99766	5.84874	23.5029	5.62951e-05	0.00269127	3	4	Down-regulated
Sus_scrofa___ENSSSCG00000045443	-3.21943	1.60788	19.9187	5.63438e-05	0.00269127	3	4	Down-regulated
Sus_scrofa___PCP4	-8.85384	3.03343	21.5507	5.83096e-05	0.00277174	3	4	Down-regulated
Sus_scrofa___ENSSSCG00000029553	-1.49358	5.80058	23.3522	5.85842e-05	0.00277595	3	4	Down-regulated
Sus_scrofa___SLC25A27	-1.95843	6.10416	23.3348	5.88146e-05	0.00277595	3	4	Down-regulated
Sus_scrofa___BMPER	-1.31076	7.14656	23.3268	5.88203e-05	0.00277595	3	4	Down-regulated
Sus_scrofa___NR3C1	-0.9751	8.6248	23.0803	6.28131e-05	0.00291556	3	4	Down-regulated
Sus_scrofa___SYTL3	-4.90164	2.02038	20.4097	6.37967e-05	0.00294046	3	4	Down-regulated
Sus_scrofa___APBB1IP	-2.35217	3.61252	22.6308	6.56252e-05	0.00301067	3	4	Down-regulated
Sus_scrofa___CNTN4	-3.6302	4.38001	22.8499	6.58423e-05	0.00301362	3	4	Down-regulated
Sus_scrofa___AP3M2	-3.17177	2.43202	21.2833	6.71108e-05	0.00304344	3	4	Down-regulated
Sus_scrofa___BTNL9	-4.58901	2.53273	19.9138	6.74288e-05	0.00305084	3	4	Down-regulated
Sus_scrofa___CD247	-2.96062	3.72416	22.7302	6.76094e-05	0.00305202	3	4	Down-regulated
Sus_scrofa___COX7A1	-6.2404	4.37113	20.7569	6.81846e-05	0.00306396	3	4	Down-regulated
Sus_scrofa___DPP8	-0.978253	7.4393	22.7666	6.83783e-05	0.00306535	3	4	Down-regulated
Sus_scrofa___ARHGAP22	-2.64498	6.05261	22.6809	7.02271e-05	0.0031202	3	4	Down-regulated
Sus_scrofa___SEL1L3	-2.47408	5.22701	22.6808	7.07746e-05	0.00312863	3	4	Down-regulated
Sus_scrofa___MEIOB	-1.4354	7.4562	22.6336	7.08925e-05	0.00312863	3	4	Down-regulated
Sus_scrofa___CEP128	-1.591	6.54039	22.586	7.1884e-05	0.00314204	3	4	Down-regulated
Sus_scrofa___FRMD4B	-2.51146	6.81782	22.5801	7.19927e-05	0.00314204	3	4	Down-regulated
Sus_scrofa___FAIM2	-3.28127	2.98741	21.7318	7.25311e-05	0.00315855	3	4	Down-regulated
Sus_scrofa___PCSK6	-1.64338	9.40632	22.4502	7.45033e-05	0.00320901	3	4	Down-regulated
Sus_scrofa___LUC7L3	-0.981862	8.8171	22.4112	7.53008e-05	0.00322926	3	4	Down-regulated
Sus_scrofa___PITPNM1	-2.08294	4.12845	22.3714	7.74805e-05	0.00331553	3	4	Down-regulated
Sus_scrofa___ENSSSCG00000035789	-6.29903	1.74136	20.3324	7.89265e-05	0.00337009	3	4	Down-regulated
Sus_scrofa___MTURN	-1.80495	5.27267	22.2145	8.01165e-05	0.00339884	3	4	Down-regulated
Sus_scrofa___KIFC2	-3.8835	1.68245	19.2185	8.04205e-05	0.00340441	3	4	Down-regulated
Sus_scrofa___CMTM8	-1.99049	6.76888	22.1114	8.18143e-05	0.00345115	3	4	Down-regulated
Sus_scrofa___DIS3L2	-0.982842	8.42998	22.058	8.2958e-05	0.00348194	3	4	Down-regulated
Sus_scrofa___CRYGS	-3.3082	2.67698	20.8652	8.34812e-05	0.00348905	3	4	Down-regulated
Sus_scrofa___NCKAP1L	-5.26129	2.10566	19.9611	8.49672e-05	0.00353618	3	4	Down-regulated
Sus_scrofa___TP53BP1	-1.02809	6.80665	21.9509	8.54906e-05	0.00355047	3	4	Down-regulated
Sus_scrofa___ENSSSCG00000009125	-1.49684	9.65699	21.8046	8.89645e-05	0.00367156	3	4	Down-regulated
Sus_scrofa___DOCK11	-1.72658	5.73844	21.7914	8.95948e-05	0.00368216	3	4	Down-regulated
Sus_scrofa___INO80C	-2.11177	4.25144	21.7885	9.12984e-05	0.00372007	3	4	Down-regulated
Sus_scrofa___KREMEN1	-1.69887	4.73832	21.6134	9.50874e-05	0.00380205	3	4	Down-regulated
Sus_scrofa___NECAB1	-2.51978	6.33988	21.5431	9.586e-05	0.00381203	3	4	Down-regulated
Sus_scrofa___ADAM33	-1.71526	6.10995	21.5267	9.6302e-05	0.00381203	3	4	Down-regulated
Sus_scrofa___CYP4V2	-1.98994	3.94378	21.5735	9.70518e-05	0.00381203	3	4	Down-regulated
Sus_scrofa___NREP	-4.60487	4.7058	21.4034	9.71833e-05	0.00381203	3	4	Down-regulated
Sus_scrofa___GALR1	-3.00114	3.34706	19.6909	9.78675e-05	0.00382303	3	4	Down-regulated
Sus_scrofa___NAA60	-1.07434	6.06607	21.3957	9.98709e-05	0.00388528	3	4	Down-regulated
Sus_scrofa___THTPA	-1.87935	3.80209	21.4341	0.000100052	0.00388528	3	4	Down-regulated
Sus_scrofa___TC2N	-3.17031	3.06292	20.6374	0.000100779	0.00389816	3	4	Down-regulated
Sus_scrofa___RCAN2	-4.89646	6.97853	21.246	0.000104388	0.00399084	3	4	Down-regulated
Sus_scrofa___GFRA1	-3.61911	5.76131	21.1762	0.000107262	0.00405265	3	4	Down-regulated
Sus_scrofa___PDK4	-4.00765	6.18434	21.1347	0.000107443	0.00405265	3	4	Down-regulated
Sus_scrofa___LRRK1	-0.917265	8.26003	21.1098	0.000108013	0.00406636	3	4	Down-regulated
Sus_scrofa___PDE1A	-1.46982	9.68613	21.0701	0.000109216	0.00410383	3	4	Down-regulated
Sus_scrofa___MYL3	-7.49699	5.09316	20.0607	0.000109712	0.00411462	3	4	Down-regulated
Sus_scrofa___ARHGAP18	-1.80969	6.39445	20.9926	0.000111769	0.00416879	3	4	Down-regulated
Sus_scrofa___CKM	-6.12353	4.41318	19.4509	0.000112097	0.00416879	3	4	Down-regulated
Sus_scrofa___FGF13	-7.19359	3.78506	20.6975	0.000112315	0.00416879	3	4	Down-regulated
Sus_scrofa___EVC	-1.30148	6.07222	20.9628	0.00011278	0.00416879	3	4	Down-regulated
Sus_scrofa___WNT5B	-3.59299	5.07223	20.9563	0.000113058	0.00416879	3	4	Down-regulated
Sus_scrofa___ENPP1	-1.15413	9.43636	20.8756	0.000115383	0.00423078	3	4	Down-regulated
Sus_scrofa___VAV1	-2.65744	2.5412	18.6378	0.0001163	0.00425437	3	4	Down-regulated
Sus_scrofa___NIPAL2	-1.33262	6.74746	20.6689	0.000122452	0.00443231	3	4	Down-regulated
Sus_scrofa___MTMR14	-1.22645	6.62858	20.6619	0.000122682	0.0044325	3	4	Down-regulated
Sus_scrofa___FGD2	-3.53555	2.50973	19.262	0.000124184	0.0044718	3	4	Down-regulated
Sus_scrofa___ENSSSCG00000043817	-1.32749	8.54446	20.5876	0.000125221	0.00449132	3	4	Down-regulated
Sus_scrofa___TMEM269	-3.39771	2.9448	19.9193	0.000125676	0.00449233	3	4	Down-regulated
Sus_scrofa___USP20	-1.68336	6.8858	20.5759	0.000125704	0.00449233	3	4	Down-regulated
Sus_scrofa___CDC14A	-1.80574	6.02316	20.5633	0.000126368	0.00450789	3	4	Down-regulated
Sus_scrofa___GALNT1	-0.946527	8.1688	20.544	0.000126791	0.00451481	3	4	Down-regulated
Sus_scrofa___SLC16A12	-2.35976	5.64757	20.4966	0.00012941	0.0045915	3	4	Down-regulated
Sus_scrofa___ENSSSCG00000010878	-1.54936	6.15038	20.4523	0.000130375	0.00460412	3	4	Down-regulated
Sus_scrofa___POU6F1	-2.0233	4.86214	20.4019	0.000133369	0.00469557	3	4	Down-regulated
Sus_scrofa___ENSSSCG00000007920	-1.67232	4.34861	20.4285	0.000133533	0.00469557	3	4	Down-regulated
Sus_scrofa___IFT46	-1.46977	5.17752	20.3772	0.000133974	0.00470268	3	4	Down-regulated
Sus_scrofa___ENSSSCG00000009208	-1.09602	7.48144	20.3225	0.000135097	0.00473366	3	4	Down-regulated
Sus_scrofa___ARHGAP4	-6.34399	1.27842	18.4854	0.000136676	0.00477203	3	4	Down-regulated
Sus_scrofa___ENSSSCG00000033010	-2.1486	4.65835	20.298	0.00013791	0.00479816	3	4	Down-regulated
Sus_scrofa___SF3B1	-1.10991	9.16875	20.241	0.000138267	0.00480114	3	4	Down-regulated
Sus_scrofa___PIK3CG	-3.38397	1.97316	18.0634	0.000138547	0.00480114	3	4	Down-regulated
Sus_scrofa___CROCC	-1.65323	4.16693	20.29	0.00013918	0.0048016	3	4	Down-regulated
Sus_scrofa___TRPM3	-2.39948	3.94597	20.1948	0.000139226	0.0048016	3	4	Down-regulated
Sus_scrofa___ENSSSCG00000001456	-3.06703	4.3163	20.1788	0.000143013	0.00490609	3	4	Down-regulated
Sus_scrofa___LLGL1	-1.5277	4.96734	20.1062	0.000145243	0.00495709	3	4	Down-regulated
Sus_scrofa___KCNS3	-3.83913	2.98178	18.9905	0.000148266	0.00504284	3	4	Down-regulated
Sus_scrofa___DYNC2I2	-1.74746	5.04484	20.0214	0.000148623	0.00504629	3	4	Down-regulated
Sus_scrofa___ENSSSCG00000007512	-1.44862	5.43572	19.9642	0.000150459	0.00508849	3	4	Down-regulated
Sus_scrofa___DIDO1	-1.23894	5.86099	19.9525	0.00015064	0.00508849	3	4	Down-regulated
Sus_scrofa___PELI2	-1.10697	8.84669	19.8935	0.00015285	0.00513649	3	4	Down-regulated
Sus_scrofa___OSTF1	-1.12099	7.00375	19.8891	0.000153103	0.00513649	3	4	Down-regulated
Sus_scrofa___ENSSSCG00000028741	-2.68935	3.80924	19.8084	0.000153706	0.00514799	3	4	Down-regulated
Papio_anubis_HERC1	-6.61245	2.212	19.7547	0.000161252	0.00532832	3	4	Down-regulated
Sus_scrofa___MPP7	-4.91316	4.21136	19.1481	0.000162096	0.00534727	3	4	Down-regulated
Sus_scrofa___HPSE2	-2.64408	6.53915	19.611	0.000166269	0.00542148	3	4	Down-regulated
Sus_scrofa___LTBP1	-1.76898	10.0329	19.5401	0.000169392	0.00549668	3	4	Down-regulated
Sus_scrofa___LY86	-3.87215	1.91119	18.3376	0.00017073	0.00553036	3	4	Down-regulated
Sus_scrofa___FBP1	-3.23896	5.01848	19.5387	0.000171101	0.00553331	3	4	Down-regulated
Sus_scrofa___GRID2	-1.81848	5.04395	19.5266	0.000171777	0.00554306	3	4	Down-regulated
Sus_scrofa___PTPRG	-1.01015	8.41432	19.4511	0.000173872	0.00558225	3	4	Down-regulated
Sus_scrofa___COL15A1	-1.78934	8.96563	19.4371	0.000174583	0.00558225	3	4	Down-regulated
Sus_scrofa___COLGALT2	-2.96739	6.2443	19.4466	0.000174596	0.00558225	3	4	Down-regulated
Sus_scrofa___TRIP13	-1.69624	4.88134	19.4383	0.000176336	0.00561648	3	4	Down-regulated
Sus_scrofa___TTN	-3.71071	10.2821	19.3838	0.000177329	0.00563312	3	4	Down-regulated
Sus_scrofa___ATP9A	-0.977984	6.92973	19.3176	0.000180879	0.00571828	3	4	Down-regulated
Sus_scrofa___CAPRIN2	-1.39405	5.32521	19.3257	0.000181278	0.00572172	3	4	Down-regulated
Sus_scrofa___RTTN	-1.31585	5.41389	19.2998	0.000182605	0.00575438	3	4	Down-regulated
Sus_scrofa___EBF3	-1.65777	8.50278	19.2681	0.000183469	0.00577238	3	4	Down-regulated
Sus_scrofa___RBPJ	-1.52037	8.82827	19.2228	0.000185927	0.00582469	3	4	Down-regulated
Sus_scrofa___ZNF483	-1.76362	4.70361	19.265	0.000186017	0.00582469	3	4	Down-regulated
Sus_scrofa___BRF1	-1.16197	5.55346	19.2128	0.000187183	0.00585193	3	4	Down-regulated
Sus_scrofa___ANKRD55	-1.93081	4.10971	19.2129	0.000190004	0.00589341	3	4	Down-regulated
Sus_scrofa___AADAC	-6.35036	1.3703	16.8914	0.000196608	0.00604127	3	4	Down-regulated
Sus_scrofa___CLK1	-1.19776	7.96937	19.0234	0.000197215	0.00605047	3	4	Down-regulated
Sus_scrofa___LIPC	-1.9529	5.6703	19.0228	0.000198086	0.00606775	3	4	Down-regulated
Sus_scrofa___BRD9	-1.48867	6.77622	19.0017	0.000198586	0.00607366	3	4	Down-regulated
Sus_scrofa___CORO2B	-2.0716	7.80913	18.9656	0.000200631	0.00610779	3	4	Down-regulated
Sus_scrofa___CYTH2	-1.33482	5.96824	18.9426	0.000202328	0.00614997	3	4	Down-regulated
Sus_scrofa___GAP43	-2.16195	5.71346	18.9298	0.000203505	0.00615706	3	4	Down-regulated
Sus_scrofa___HSPB6	-4.57113	2.30855	17.4699	0.000204122	0.00615706	3	4	Down-regulated
Sus_scrofa___ENSSSCG00000021374	-7.68748	2.50406	18.2714	0.000204654	0.00616368	3	4	Down-regulated
Sus_scrofa___PIK3IP1	-2.26667	3.66097	18.8223	0.000205471	0.00617884	3	4	Down-regulated
Sus_scrofa___C1QB	-3.81237	1.95108	18.3296	0.000206339	0.00619551	3	4	Down-regulated
Sus_scrofa___BTBD11	-1.79752	3.4975	18.8493	0.00020746	0.00621852	3	4	Down-regulated
Sus_scrofa___CDH19	-4.10413	1.70649	17.065	0.000209986	0.00623223	3	4	Down-regulated
Sus_scrofa___LTBP4	-1.46338	6.42412	18.8132	0.000210089	0.00623223	3	4	Down-regulated
Sus_scrofa___GAMT	-2.56864	1.84841	17.0138	0.00021324	0.00631618	3	4	Down-regulated
Sus_scrofa___TSPAN4	-2.5356	3.40942	18.662	0.000214291	0.00632777	3	4	Down-regulated
Sus_scrofa___CDC42BPB	-0.913675	8.24588	18.7389	0.000214593	0.00632777	3	4	Down-regulated
Sus_scrofa___CEP43	-1.26319	5.18653	18.7559	0.000215105	0.0063334	3	4	Down-regulated
Sus_scrofa___ADAM19	-2.83705	7.59488	18.6829	0.000218279	0.00640771	3	4	Down-regulated
Sus_scrofa___ARID4A	-1.10377	7.23242	18.649	0.000220466	0.0064623	3	4	Down-regulated
Sus_scrofa___ATG4C	-1.42036	6.11185	18.6457	0.000220995	0.00646585	3	4	Down-regulated
Sus_scrofa___CYTH4	-3.43743	1.79339	16.4898	0.000224284	0.00654503	3	4	Down-regulated
Sus_scrofa___MYBPC3	-7.95478	6.13833	17.9263	0.000231085	0.00667439	3	4	Down-regulated
Sus_scrofa___WDR19	-1.17394	5.47574	18.4824	0.000232661	0.00670522	3	4	Down-regulated
Sus_scrofa___ENSSSCG00000033648	-1.70451	5.77909	18.3892	0.000238881	0.00680984	3	4	Down-regulated
Sus_scrofa___ENSSSCG00000035736	-6.65486	1.30602	19.346	0.000240881	0.00684976	3	4	Down-regulated
Sus_scrofa___WBP2	-1.44311	5.85163	18.3092	0.000244611	0.00690224	3	4	Down-regulated
Sus_scrofa___CHMP2A	-1.56712	4.58562	18.3397	0.000244921	0.00690224	3	4	Down-regulated
Sus_scrofa___HDAC4	-1.17216	7.08285	18.2836	0.000246052	0.00692421	3	4	Down-regulated
Sus_scrofa___MORN3	-4.36852	2.55054	17.3904	0.000246553	0.00692842	3	4	Down-regulated
Sus_scrofa___RFX2	-1.85865	7.61038	18.2254	0.000250381	0.00698625	3	4	Down-regulated
Sus_scrofa___RUBCNL	-2.39248	4.06352	18.253	0.000251205	0.00698945	3	4	Down-regulated
Sus_scrofa___OGA	-1.03283	7.777	18.1711	0.000254491	0.00706096	3	4	Down-regulated
Sus_scrofa___HMCN2	-4.33113	8.65022	18.156	0.000255709	0.00708479	3	4	Down-regulated
Sus_scrofa___LRIG3	-2.03573	5.76766	18.1205	0.000259162	0.00715032	3	4	Down-regulated
Sus_scrofa___NR3C2	-2.74548	7.11402	18.0936	0.000260671	0.00718191	3	4	Down-regulated
Sus_scrofa___ENSSSCG00000033497	-1.10527	8.61023	18.0688	0.00026247	0.00719131	3	4	Down-regulated
Sus_scrofa___DHX37	-1.28308	5.20953	18.0759	0.000263412	0.0072071	3	4	Down-regulated
Sus_scrofa___ENSSSCG00000015664	-1.75682	6.49985	18.0297	0.000266058	0.00725936	3	4	Down-regulated
Sus_scrofa___CAMK1D	-2.0593	7.77583	17.9749	0.000270118	0.00733968	3	4	Down-regulated
Sus_scrofa___SCN9A	-2.50954	2.18759	16.6929	0.000273304	0.00738198	3	4	Down-regulated
Sus_scrofa___CPEB1	-3.20832	2.49497	17.2112	0.000274168	0.00738867	3	4	Down-regulated
Sus_scrofa___DOCK6	-1.58994	5.35135	17.8883	0.000278442	0.0074748	3	4	Down-regulated
Sus_scrofa___GUCY1B1	-1.78855	6.45137	17.8769	0.0002785	0.0074748	3	4	Down-regulated
Sus_scrofa___TXLNB	-7.8028	2.44841	16.8706	0.000281783	0.00754882	3	4	Down-regulated
Sus_scrofa___AGAP3	-1.50055	7.09486	17.8335	0.000282024	0.00754882	3	4	Down-regulated
Sus_scrofa___CCDC82	-1.79092	5.75082	17.8025	0.000285414	0.00758808	3	4	Down-regulated
Sus_scrofa___GALNT17	-2.05204	6.72041	17.7906	0.000285951	0.00759214	3	4	Down-regulated
Sus_scrofa___WNT9A	-2.22457	4.22559	17.8252	0.000286553	0.00759788	3	4	Down-regulated
Sus_scrofa___CYP2B22	-2.73805	4.6047	17.7563	0.000290286	0.00768654	3	4	Down-regulated
Sus_scrofa___MCOLN2	-2.8103	4.7356	17.7696	0.000292874	0.00772396	3	4	Down-regulated
Sus_scrofa___RAB11FIP3	-1.22605	7.06975	17.6908	0.000294612	0.00775943	3	4	Down-regulated
Sus_scrofa___DNM3	-1.62362	6.78536	17.6784	0.000295809	0.00775988	3	4	Down-regulated
Sus_scrofa___DNMBP	-0.985012	7.30213	17.6659	0.000296813	0.00776555	3	4	Down-regulated
Sus_scrofa___THEMIS2	-2.75803	1.72426	15.7995	0.000298436	0.00779769	3	4	Down-regulated
Sus_scrofa___FILIP1	-3.3258	6.94927	17.6431	0.000299498	0.00780811	3	4	Down-regulated
Sus_scrofa___CEP78	-1.46956	4.73757	17.6424	0.000302015	0.0078478	3	4	Down-regulated
Sus_scrofa___DLC1	-1.04694	11.1107	17.6007	0.000302741	0.0078478	3	4	Down-regulated
Sus_scrofa___CACHD1	-1.14432	6.61433	17.592	0.000303738	0.0078633	3	4	Down-regulated
Sus_scrofa___SCP2	-1.11652	7.65207	17.5473	0.00030779	0.00795777	3	4	Down-regulated
Sus_scrofa___SV2C	-3.30256	3.33111	17.1513	0.000310109	0.00800723	3	4	Down-regulated
Sus_scrofa___RGS6	-4.47036	5.72861	17.5148	0.000311245	0.00802605	3	4	Down-regulated
Sus_scrofa___FLOT1	-1.582	4.83215	17.5287	0.000312208	0.00804039	3	4	Down-regulated
Sus_scrofa___CAPN6	-4.0071	1.98557	15.8643	0.000316228	0.0081016	3	4	Down-regulated
Sus_scrofa___GPS1	-1.51309	4.36526	17.5041	0.000316823	0.00810631	3	4	Down-regulated
Sus_scrofa___PRRX1	-2.27913	6.6399	17.446	0.000317943	0.00811393	3	4	Down-regulated
Sus_scrofa___SOX13	-1.97094	4.76389	17.4644	0.000318806	0.00812545	3	4	Down-regulated
Sus_scrofa___PACS2	-1.37514	5.24139	17.4114	0.000322756	0.00815057	3	4	Down-regulated
Sus_scrofa___CDC25B	-1.82497	5.07687	17.4108	0.000323511	0.00815057	3	4	Down-regulated
Sus_scrofa___UAP1	-1.37737	8.09012	17.3732	0.000324735	0.00816058	3	4	Down-regulated
Sus_scrofa___GPR17	-5.46471	2.81479	17.0783	0.000326064	0.00816278	3	4	Down-regulated
Sus_scrofa___ARL6IP4	-1.37489	4.62877	17.3374	0.000332201	0.0082744	3	4	Down-regulated
Sus_scrofa___REV1	-1.65016	9.29244	17.2882	0.000333345	0.0082882	3	4	Down-regulated
Sus_scrofa___FIG4	-1.20133	7.22537	17.2309	0.00033939	0.00840043	3	4	Down-regulated
Sus_scrofa___MFAP5	-1.82081	8.59432	17.1975	0.00034286	0.00843441	3	4	Down-regulated
Sus_scrofa___CORO1A	-6.03608	1.06162	17.7469	0.000343234	0.00843441	3	4	Down-regulated
Sus_scrofa___GPIHBP1	-4.38412	2.61941	15.9313	0.000343328	0.00843441	3	4	Down-regulated
Sus_scrofa___GK5	-1.26964	7.63158	17.1889	0.00034381	0.00843575	3	4	Down-regulated
Sus_scrofa___RAB32	-1.51946	5.89341	17.1791	0.000345423	0.00846468	3	4	Down-regulated
Sus_scrofa___VSIG4	-3.59309	2.16918	16.4882	0.000346173	0.00846468	3	4	Down-regulated
Sus_scrofa___ENSSSCG00000049439	-4.59118	1.80994	15.7224	0.000346276	0.00846468	3	4	Down-regulated
Sus_scrofa___LAYN	-2.32281	2.68328	16.4751	0.000348801	0.00849901	3	4	Down-regulated
Sus_scrofa___MTRR	-0.989419	6.20247	17.1395	0.00034946	0.00850036	3	4	Down-regulated
Sus_scrofa___ABCC10	-1.29647	4.76456	17.14	0.000352424	0.00852842	3	4	Down-regulated
Papio_anubis_MEIS1	-5.61068	1.44021	15.667	0.000355931	0.00856275	3	4	Down-regulated
Sus_scrofa___RGS12	-1.12517	6.39012	17.074	0.000356581	0.00856793	3	4	Down-regulated
Sus_scrofa___ART4	-2.46678	7.05624	17.0562	0.000358509	0.00858929	3	4	Down-regulated
Sus_scrofa___NHSL2	-1.56484	6.87153	17.0527	0.000358776	0.00858929	3	4	Down-regulated
Sus_scrofa___UNC13C	-5.03473	5.29461	16.9877	0.000360063	0.00860965	3	4	Down-regulated
Sus_scrofa___GABBR1	-1.22103	5.68934	17.0332	0.000361704	0.00861538	3	4	Down-regulated
Sus_scrofa___ADGRG3	-5.72893	1.33977	15.335	0.000362545	0.00861677	3	4	Down-regulated
Sus_scrofa___IGDCC4	-2.1588	4.77232	16.9986	0.000368153	0.00871855	3	4	Down-regulated
Sus_scrofa___ENSSSCG00000036052	-10.0632	4.43766	17.4337	0.000369086	0.00872747	3	4	Down-regulated
Sus_scrofa___ENSSSCG00000011121	-1.21227	10.4741	16.9517	0.000370092	0.00872747	3	4	Down-regulated
Sus_scrofa___PRKAG2	-1.5314	8.30711	16.9507	0.000370236	0.00872747	3	4	Down-regulated
Sus_scrofa___KIN	-1.00966	6.83095	16.9479	0.000370685	0.00872747	3	4	Down-regulated
Sus_scrofa___RHOH	-2.57789	2.22726	16.9854	0.000371739	0.00872747	3	4	Down-regulated
Sus_scrofa___PLXNA3	-2.39616	3.58987	16.866	0.000372069	0.00872747	3	4	Down-regulated
Sus_scrofa___FYN	-1.24739	9.28182	16.9127	0.000374636	0.00875644	3	4	Down-regulated
Sus_scrofa___TPCN1	-1.41711	5.22916	16.9119	0.000376804	0.0087962	3	4	Down-regulated
Sus_scrofa___CLEC3B	-2.03089	4.57095	16.9137	0.000378565	0.00880655	3	4	Down-regulated
Sus_scrofa___E4F1	-1.36427	5.34005	16.8819	0.000379839	0.0088154	3	4	Down-regulated
Sus_scrofa___INPP4B	-3.3594	6.7552	16.8408	0.000384033	0.00889181	3	4	Down-regulated
Sus_scrofa___SUSD4	-2.47184	4.69498	16.8447	0.000387674	0.00896558	3	4	Down-regulated
Sus_scrofa___LIMS2	-3.91742	5.10688	16.7809	0.000389012	0.00896876	3	4	Down-regulated
Sus_scrofa___DCLK1	-1.24996	8.13255	16.7226	0.000397646	0.00912136	3	4	Down-regulated
Papio_anubis_TFDP2	-6.6788	2.00286	15.8131	0.000398812	0.00912687	3	4	Down-regulated
Sus_scrofa___LRRTM4	-2.31169	3.75387	16.6988	0.000400832	0.00916247	3	4	Down-regulated
Sus_scrofa___ENO3	-4.57409	2.799	15.3603	0.000405045	0.00923737	3	4	Down-regulated
Sus_scrofa___KMO	-2.12019	2.78384	15.7848	0.000406861	0.00925739	3	4	Down-regulated
Sus_scrofa___ENSSSCG00000013100	-3.23559	2.72742	15.0215	0.000416215	0.00939349	3	4	Down-regulated
Sus_scrofa___CASZ1	-7.07231	1.66264	14.8422	0.000422943	0.00949193	3	4	Down-regulated
Sus_scrofa___HSPG2	-1.08806	8.84588	16.492	0.000427588	0.00954188	3	4	Down-regulated
Sus_scrofa___RAB3IL1	-2.62317	4.44894	16.4858	0.000432147	0.00961787	3	4	Down-regulated
Sus_scrofa___DKK2	-3.20618	4.13466	16.4141	0.000432456	0.00961787	3	4	Down-regulated
Sus_scrofa___SRL	-7.74135	2.62711	15.6665	0.000439485	0.00971942	3	4	Down-regulated
Sus_scrofa___ENSSSCG00000014097	-1.54595	4.79592	16.4225	0.000442004	0.00975326	3	4	Down-regulated
Papio_anubis_ENSPANG00000016983	-8.46485	2.7388	15.2613	0.000449017	0.00986994	3	4	Down-regulated
Sus_scrofa___TCEA2	-1.42535	5.02831	16.333	0.000452575	0.00990892	3	4	Down-regulated
Sus_scrofa___SPOCK2	-2.45691	2.36003	15.1335	0.000453551	0.00991189	3	4	Down-regulated
Sus_scrofa___MRGPRF	-3.15821	2.28965	15.2348	0.000453715	0.00991189	3	4	Down-regulated
Sus_scrofa___RNF207	-6.28304	1.13372	16.2948	0.000457249	0.00997804	3	4	Down-regulated
Sus_scrofa___YPEL3	-1.92793	4.93328	16.2898	0.0004597	0.0100112	3	4	Down-regulated
Sus_scrofa___CCDC170	-1.06936	7.09106	16.2637	0.000459785	0.0100112	3	4	Down-regulated
Sus_scrofa___ENSSSCG00000035371	-1.86876	4.46835	16.2886	0.000460669	0.0100194	3	4	Down-regulated
Sus_scrofa___COL21A1	-2.46248	7.7105	16.253	0.000461336	0.0100229	3	4	Down-regulated
Sus_scrofa___C8orf88	-2.19937	5.03579	16.2432	0.000465854	0.0100869	3	4	Down-regulated
Sus_scrofa___CD4	-2.52582	1.97493	14.5836	0.000474282	0.0101989	3	4	Down-regulated
Sus_scrofa___ARSB	-1.57265	5.47604	16.1254	0.00048207	0.0103255	3	4	Down-regulated
Sus_scrofa___ENSSSCG00000015747	-4.4621	4.79971	15.6618	0.000492079	0.010483	3	4	Down-regulated
Sus_scrofa___FLT3	-3.13943	1.87322	14.5527	0.000495285	0.0105015	3	4	Down-regulated
Sus_scrofa___BCL11B	-6.63845	1.40822	15.5649	0.000495354	0.0105015	3	4	Down-regulated
Sus_scrofa___CEP68	-1.35119	5.40635	15.99	0.000503483	0.0106227	3	4	Down-regulated
Sus_scrofa___PDE4DIP	-5.78724	5.49087	15.6671	0.000506179	0.0106682	3	4	Down-regulated
Sus_scrofa___CDH20	-2.68695	3.30091	15.4809	0.000509417	0.0107249	3	4	Down-regulated
Sus_scrofa___MOK	-1.54875	4.53348	15.9363	0.0005168	0.0107769	3	4	Down-regulated
Sus_scrofa___TECRL	-8.91267	3.78064	16.3316	0.000516829	0.0107769	3	4	Down-regulated
Sus_scrofa___PCDH7	-4.23634	6.79742	15.8926	0.000518545	0.0107904	3	4	Down-regulated
Sus_scrofa___ITGAM	-2.67289	3.31579	15.4599	0.000519783	0.0108048	3	4	Down-regulated
Sus_scrofa___HIGD1B	-3.11	3.01816	15.452	0.000526485	0.0108853	3	4	Down-regulated
Sus_scrofa___CCDC171	-1.43591	5.27694	15.8147	0.000533088	0.0110002	3	4	Down-regulated
Sus_scrofa___ASPDH	-5.33983	5.69258	15.7222	0.0005342	0.0110117	3	4	Down-regulated
Sus_scrofa___ST3GAL5	-2.18671	5.99632	15.7572	0.00054172	0.0111377	3	4	Down-regulated
Sus_scrofa___ARFGAP2	-1.05786	5.44083	15.7586	0.000542007	0.0111377	3	4	Down-regulated
Sus_scrofa___CASS4	-2.20576	2.11329	14.6782	0.000543683	0.0111605	3	4	Down-regulated
Sus_scrofa___CMTM7	-2.37701	3.13274	15.6128	0.000547543	0.0112047	3	4	Down-regulated
Sus_scrofa___ZNF704	-1.5153	8.45654	15.6902	0.000552426	0.0112348	3	4	Down-regulated
Sus_scrofa___RFX3	-0.987778	7.35505	15.6696	0.000556191	0.0112764	3	4	Down-regulated
Sus_scrofa___AURKB	-2.17158	3.3931	15.6166	0.00055998	0.0113184	3	4	Down-regulated
Sus_scrofa___ENSSSCG00000017643	-3.02968	3.54472	15.5232	0.000563577	0.0113692	3	4	Down-regulated
Sus_scrofa___BLNK	-2.65637	3.37734	15.3396	0.000569274	0.0114476	3	4	Down-regulated
Sus_scrofa___PTPN22	-2.46885	2.06258	14.378	0.000569858	0.0114476	3	4	Down-regulated
Sus_scrofa___ATOH8	-2.41425	4.11951	15.6097	0.000573821	0.0115038	3	4	Down-regulated
Sus_scrofa___FOXN3	-0.928166	9.27666	15.508	0.000585977	0.0116881	3	4	Down-regulated
Sus_scrofa___ENSSSCG00000037775	-2.75519	2.15317	14.2058	0.000587167	0.0116987	3	4	Down-regulated
Sus_scrofa___EHD3	-2.95577	2.92061	14.5401	0.000587691	0.0116987	3	4	Down-regulated
Sus_scrofa___OTULINL	-2.22039	3.73524	15.4864	0.000590156	0.011701	3	4	Down-regulated
Sus_scrofa___TLE4	-1.4087	6.66246	15.457	0.000596096	0.0118064	3	4	Down-regulated
Sus_scrofa___ACE	-1.88792	2.59256	14.905	0.000601896	0.0119093	3	4	Down-regulated
Sus_scrofa___ABHD17A	-1.63834	4.7742	15.4409	0.000603755	0.011931	3	4	Down-regulated
Sus_scrofa___TRPV2	-2.73242	2.28032	14.2594	0.000604203	0.011931	3	4	Down-regulated
Papio_anubis_EBF3	-2.86614	2.98355	15.1023	0.00060559	0.0119414	3	4	Down-regulated
Sus_scrofa___CREBBP	-0.818338	8.73311	15.3911	0.000608693	0.0119837	3	4	Down-regulated
Sus_scrofa___OPCML	-3.02886	6.8894	15.3836	0.000610748	0.0119883	3	4	Down-regulated
Sus_scrofa___MROH9	-2.27557	3.79039	15.3389	0.000614695	0.0120299	3	4	Down-regulated
Sus_scrofa___SUSD1	-2.36111	3.01141	14.9702	0.000619429	0.0120704	3	4	Down-regulated
Sus_scrofa___CCDC150	-1.10862	5.59493	15.3322	0.000621943	0.0120704	3	4	Down-regulated
Sus_scrofa___RAPGEF1	-0.962038	7.09256	15.3253	0.000622038	0.0120704	3	4	Down-regulated
Sus_scrofa___SNX33	-1.51034	5.11398	15.3374	0.000622886	0.0120704	3	4	Down-regulated
Sus_scrofa___COL6A6	-2.79685	8.06668	15.2945	0.000628266	0.0121627	3	4	Down-regulated
Sus_scrofa___ESRRG	-8.97591	3.4935	15.5341	0.000632239	0.0122156	3	4	Down-regulated
Sus_scrofa___ARHGEF2	-1.0631	6.67167	15.2469	0.000638305	0.0122847	3	4	Down-regulated
Sus_scrofa___TTC13	-0.86808	6.84103	15.1303	0.000663073	0.012656	3	4	Down-regulated
Sus_scrofa___MYH7B	-8.41122	2.88416	14.6861	0.000664673	0.012656	3	4	Down-regulated
Sus_scrofa___RAC3	-1.50242	3.40607	15.0637	0.000664684	0.012656	3	4	Down-regulated
Sus_scrofa___ENSSSCG00000025940	-0.896669	6.26536	15.1203	0.000665558	0.012656	3	4	Down-regulated
Sus_scrofa___FBN1	-1.1087	10.5552	15.1161	0.000665937	0.012656	3	4	Down-regulated
Sus_scrofa___IFN-DELTA-1	-3.10682	2.48696	14.1538	0.000676291	0.0127931	3	4	Down-regulated
Sus_scrofa___LAMC2	-1.87151	6.10582	15.0594	0.00067945	0.0128263	3	4	Down-regulated
Sus_scrofa___ZMIZ1	-1.14672	8.9345	15.0454	0.00068161	0.0128528	3	4	Down-regulated
Sus_scrofa___RGS5	-2.89634	5.2919	15.053	0.000682155	0.0128528	3	4	Down-regulated
Sus_scrofa___ENSSSCG00000021401	-2.27666	2.70969	14.7206	0.000686229	0.0129172	3	4	Down-regulated
Sus_scrofa___C4BPA	-5.80192	1.17509	14.3196	0.000688532	0.0129482	3	4	Down-regulated
Sus_scrofa___RET	-2.90849	3.48953	14.9368	0.000691075	0.0129593	3	4	Down-regulated
Sus_scrofa___BTK	-2.69357	1.62603	13.4795	0.000691091	0.0129593	3	4	Down-regulated
Sus_scrofa___EMILIN2	-2.79587	4.1186	14.9763	0.000693417	0.0129849	3	4	Down-regulated
Sus_scrofa___SOGA1	-1.04693	6.37529	14.9939	0.000693775	0.0129849	3	4	Down-regulated
Sus_scrofa___AIG1	-1.44314	5.66259	14.991	0.000695386	0.0129965	3	4	Down-regulated
Sus_scrofa___CD200R1	-3.05223	2.02817	13.699	0.00069571	0.0129965	3	4	Down-regulated
Sus_scrofa___ENSSSCG00000040016	-2.64149	2.41476	14.268	0.000699507	0.0130216	3	4	Down-regulated
Sus_scrofa___RASGEF1B	-1.36065	7.06313	14.9638	0.000700355	0.0130216	3	4	Down-regulated
Sus_scrofa___ENSSSCG00000033909	-3.02892	2.37499	13.6297	0.000703239	0.0130506	3	4	Down-regulated
Sus_scrofa___LRFN5	-2.46011	4.88778	14.9679	0.000705189	0.0130745	3	4	Down-regulated
Sus_scrofa___CEP162	-1.1528	7.0606	14.9192	0.000710705	0.0131644	3	4	Down-regulated
Sus_scrofa___DLG2	-2.35755	9.33503	14.9007	0.000714898	0.0132049	3	4	Down-regulated
Sus_scrofa___TSC1	-1.13542	6.0227	14.901	0.0007158	0.0132091	3	4	Down-regulated
Sus_scrofa___ITGB1BP1	-0.937676	6.71683	14.8756	0.000721142	0.0132953	3	4	Down-regulated
Sus_scrofa___ENSSSCG00000000657	-2.49746	5.78061	14.8748	0.000722899	0.0133153	3	4	Down-regulated
Sus_scrofa___ENSSSCG00000013754	-1.79005	5.61264	14.8582	0.000728894	0.0134131	3	4	Down-regulated
Sus_scrofa___ENPP2	-2.44549	5.82462	14.8094	0.000739042	0.0135117	3	4	Down-regulated
Sus_scrofa___FCHSD1	-1.905	3.58198	14.825	0.000739834	0.0135136	3	4	Down-regulated
Sus_scrofa___CDKL1	-1.3694	6.78582	14.7699	0.00074684	0.0135912	3	4	Down-regulated
Sus_scrofa___B3GAT3	-1.3389	4.7295	14.7654	0.000753434	0.0136986	3	4	Down-regulated
Sus_scrofa___KLHL7	-1.33459	5.94058	14.7066	0.000763499	0.0138688	3	4	Down-regulated
Sus_scrofa___NCAPD3	-1.34985	5.15891	14.6788	0.000773247	0.0139842	3	4	Down-regulated
Sus_scrofa___PEPD	-1.21991	5.30237	14.6751	0.000773393	0.0139842	3	4	Down-regulated
Sus_scrofa___EBF2	-1.14133	9.53333	14.6395	0.000779522	0.0140821	3	4	Down-regulated
Sus_scrofa___ENSSSCG00000040419	-1.11629	5.46877	14.637	0.000782246	0.0141184	3	4	Down-regulated
Sus_scrofa___ZSWIM7	-1.02791	5.51712	14.608	0.000789712	0.0142141	3	4	Down-regulated
Sus_scrofa___CIZ1	-1.20165	5.76118	14.6018	0.000790893	0.0142224	3	4	Down-regulated
Sus_scrofa___RYR2	-4.37679	8.66189	14.5918	0.000792188	0.0142327	3	4	Down-regulated
Sus_scrofa___CPT1B	-7.21013	1.88422	13.832	0.000793956	0.0142385	3	4	Down-regulated
Sus_scrofa___GALNS	-1.31244	5.19614	14.5912	0.000795517	0.0142536	3	4	Down-regulated
Sus_scrofa___PKD2	-0.913683	7.74155	14.5661	0.0007989	0.0142624	3	4	Down-regulated
Sus_scrofa___CATSPERB	-3.24912	2.07381	13.3386	0.000816844	0.0145039	3	4	Down-regulated
Sus_scrofa___ENSSSCG00000034610	-4.57849	6.10046	14.4883	0.000820355	0.0145532	3	4	Down-regulated
Sus_scrofa___IRF5	-3.49167	2.01963	13.1753	0.000823691	0.0145992	3	4	Down-regulated
Sus_scrofa___NME4	-5.51627	1.12973	13.1684	0.000828811	0.0146636	3	4	Down-regulated
Sus_scrofa___NLRP3	-3.07636	2.16021	13.1262	0.000837797	0.0147798	3	4	Down-regulated
Sus_scrofa___STXBP5	-1.01414	7.07843	14.4113	0.000841409	0.0148068	3	4	Down-regulated
Sus_scrofa___TAOK3	-1.05598	6.97081	14.4072	0.000842613	0.0148125	3	4	Down-regulated
Sus_scrofa___RASGRF2	-2.91025	5.3598	14.3867	0.000851371	0.0149422	3	4	Down-regulated
Sus_scrofa___PLAAT3	-2.1069	4.76286	14.3849	0.000853889	0.0149527	3	4	Down-regulated
Sus_scrofa___ATP13A2	-1.58673	5.02578	14.3839	0.000854245	0.0149527	3	4	Down-regulated
Sus_scrofa___LAPTM5	-2.88784	1.98218	13.1342	0.000867683	0.0151208	3	4	Down-regulated
Sus_scrofa___TNNT2	-4.77983	5.7009	14.3241	0.00087127	0.0151699	3	4	Down-regulated
Sus_scrofa___ENSSSCG00000027232	-3.06835	1.72347	12.7951	0.000873952	0.0152032	3	4	Down-regulated
Sus_scrofa___HGS	-1.30667	6.17557	14.2783	0.0008806	0.0153054	3	4	Down-regulated
Sus_scrofa___MYOM1	-6.68152	3.66525	14.2183	0.000883237	0.0153307	3	4	Down-regulated
Sus_scrofa___ENSSSCG00000023419	-0.967729	6.15747	14.2658	0.000884158	0.0153307	3	4	Down-regulated
Sus_scrofa___ARHGAP10	-1.34104	10.16	14.2577	0.00088572	0.0153372	3	4	Down-regulated
Sus_scrofa___USP13	-5.88279	3.28349	14.1634	0.000892369	0.0153745	3	4	Down-regulated
Sus_scrofa___SLC7A7	-1.70257	4.92401	14.2435	0.000895555	0.0154159	3	4	Down-regulated
Sus_scrofa___ASB15	-6.95672	1.78909	13.7276	0.000900605	0.0154758	3	4	Down-regulated
Sus_scrofa___CCL26	-7.75816	2.54305	13.9782	0.000904922	0.0155095	3	4	Down-regulated
Sus_scrofa___CDH13	-2.98829	7.88633	14.126	0.000926535	0.0157839	3	4	Down-regulated
Sus_scrofa___TFPI	-7.19154	2.7232	14.3143	0.000934639	0.0158808	3	4	Down-regulated
Sus_scrofa___YWHAQ	-0.877662	7.25036	14.0628	0.000946128	0.0159829	3	4	Down-regulated
Sus_scrofa___CCDC142	-1.83238	3.59403	14.0568	0.000946156	0.0159829	3	4	Down-regulated
Sus_scrofa___CHCHD10	-4.28078	3.8339	13.225	0.000946157	0.0159829	3	4	Down-regulated
Sus_scrofa___RAP1GAP2	-3.00913	2.76983	13.018	0.000947131	0.0159829	3	4	Down-regulated
Sus_scrofa___SLC5A10	-1.34257	7.20514	14.0349	0.000955118	0.0160628	3	4	Down-regulated
Sus_scrofa___SUGP2	-0.985388	5.67496	14.031	0.000957966	0.0160843	3	4	Down-regulated
Sus_scrofa___DAZAP1	-1.13042	7.18849	14.0042	0.000965105	0.0161618	3	4	Down-regulated
Sus_scrofa___SYNE3	-1.20005	7.07884	13.9736	0.00097517	0.0162864	3	4	Down-regulated
Sus_scrofa___PKD1	-1.01328	7.37615	13.9734	0.000975182	0.0162864	3	4	Down-regulated
Sus_scrofa___ANGEL2	-1.02815	6.71689	13.972	0.000975846	0.0162864	3	4	Down-regulated
Sus_scrofa___MAD1L1	-1.04826	6.6422	13.9552	0.000981571	0.0163543	3	4	Down-regulated
Sus_scrofa___AP2A2	-1.02791	7.16139	13.9426	0.000985501	0.0164059	3	4	Down-regulated
Sus_scrofa___VASH2	-1.16679	5.92725	13.941	0.000987689	0.0164285	3	4	Down-regulated
Sus_scrofa___ENSSSCG00000033643	-2.79812	1.80197	12.8441	0.000990024	0.0164534	3	4	Down-regulated
Sus_scrofa___RAD17	-1.12176	5.22011	13.9106	0.000999609	0.0165735	3	4	Down-regulated
Sus_scrofa___ITGB5	-1.32196	7.44039	13.8922	0.00100242	0.0166035	3	4	Down-regulated
Sus_scrofa___ASB4	-7.39381	2.24499	13.1715	0.00101965	0.0168183	3	4	Down-regulated
Sus_scrofa___IST1	-0.882883	6.39841	13.8066	0.00103251	0.0169556	3	4	Down-regulated
Sus_scrofa___GPR176	-1.61764	6.46804	13.7907	0.00103818	0.016996	3	4	Down-regulated
Sus_scrofa___GAS2	-1.87031	4.26346	13.8235	0.00103934	0.0170009	3	4	Down-regulated
Sus_scrofa___ENSSSCG00000000530	-1.62245	7.05361	13.7509	0.00105219	0.0171259	3	4	Down-regulated
Sus_scrofa___DPYSL2	-1.09987	7.39321	13.7386	0.0010563	0.0171666	3	4	Down-regulated
Sus_scrofa___ISCU	-2.20204	3.50551	13.3742	0.00105949	0.0171792	3	4	Down-regulated
Sus_scrofa___USP12	-0.790196	6.68073	13.6947	0.00107252	0.0172856	3	4	Down-regulated
Sus_scrofa___ENSSSCG00000040083	-2.50507	2.76127	13.3229	0.00107613	0.0173155	3	4	Down-regulated
Sus_scrofa___CDKL5	-1.07687	6.6927	13.6614	0.0010848	0.0174124	3	4	Down-regulated
Sus_scrofa___ENSSSCG00000003261	-3.39509	3.08095	13.1874	0.00109124	0.0174732	3	4	Down-regulated
Sus_scrofa___SLU7	-1.02223	5.42892	13.6124	0.00110555	0.0176599	3	4	Down-regulated
Sus_scrofa___LMO1	-3.89237	1.50658	12.3928	0.001111	0.0177204	3	4	Down-regulated
Sus_scrofa___NEBL	-3.8613	7.55086	13.548	0.00112827	0.0178918	3	4	Down-regulated
Sus_scrofa___DOCK3	-6.23768	3.12941	13.2654	0.00113123	0.01791	3	4	Down-regulated
Sus_scrofa___ENSSSCG00000044640	-3.27549	2.44594	12.6299	0.00113368	0.0179343	3	4	Down-regulated
Sus_scrofa___LHFPL1	-2.5739	1.78451	12.3968	0.0011356	0.0179382	3	4	Down-regulated
Sus_scrofa___PRDM16	-5.21909	2.09719	12.5519	0.00114076	0.018003	3	4	Down-regulated
Sus_scrofa___ECE1	-1.45658	6.37006	13.4984	0.00114753	0.0180809	3	4	Down-regulated
Sus_scrofa___SUN1	-1.16694	7.14419	13.4881	0.00115108	0.0181225	3	4	Down-regulated
Sus_scrofa___CLCN6	-1.65997	4.35217	13.5132	0.00115323	0.0181418	3	4	Down-regulated
Sus_scrofa___GRIK4	-1.67234	5.08691	13.4831	0.00115795	0.018187	3	4	Down-regulated
Sus_scrofa___TPM2	-5.51288	4.11569	13.1551	0.00116148	0.0182279	3	4	Down-regulated
Sus_scrofa___ENSSSCG00000046937	-2.07887	4.46409	13.4875	0.00116363	0.0182471	3	4	Down-regulated
Sus_scrofa___SNX15	-2.15091	3.22274	13.3917	0.00116562	0.0182638	3	4	Down-regulated
Sus_scrofa___DENND11	-1.88203	3.10795	13.2611	0.00117683	0.0183812	3	4	Down-regulated
Sus_scrofa___SLC4A11	-2.87529	2.33424	12.583	0.00118357	0.0184392	3	4	Down-regulated
Papio_anubis_SF3B1	-1.932	5.37225	13.3978	0.00119143	0.018492	3	4	Down-regulated
Sus_scrofa___GCNT3	-6.65623	2.15478	13.0611	0.00119979	0.0186071	3	4	Down-regulated
Sus_scrofa___SLC43A3	-1.19749	5.11648	13.3676	0.00120427	0.0186473	3	4	Down-regulated
Sus_scrofa___ENSSSCG00000024162	-1.54561	4.78342	13.3742	0.00120556	0.0186482	3	4	Down-regulated
Sus_scrofa___ENSSSCG00000031608	-7.61179	2.37819	12.7611	0.00120717	0.0186482	3	4	Down-regulated
Sus_scrofa___ENSSSCG00000047475	-1.99137	5.9991	13.3483	0.00120992	0.018665	3	4	Down-regulated
Sus_scrofa___AK5	-2.40719	4.11933	13.3561	0.00121135	0.018665	3	4	Down-regulated
Sus_scrofa___PGAM2	-4.78092	1.98304	12.3853	0.00121478	0.0186657	3	4	Down-regulated
Sus_scrofa___ADAMTS16	-2.77121	3.59225	13.1531	0.00121492	0.0186657	3	4	Down-regulated
Sus_scrofa___HUNK	-3.12243	5.16454	13.3147	0.00122205	0.0187606	3	4	Down-regulated
Sus_scrofa___XKR4	-2.63776	2.75566	12.9459	0.00122565	0.0188012	3	4	Down-regulated
Sus_scrofa___ENSSSCG00000013568	-0.963779	5.46647	13.3042	0.00122936	0.0188084	3	4	Down-regulated
Sus_scrofa___TBC1D22A	-0.994079	6.74944	13.2783	0.00123778	0.0188707	3	4	Down-regulated
Sus_scrofa___MIIP	-1.66426	4.09772	13.3109	0.0012383	0.0188707	3	4	Down-regulated
Sus_scrofa___CNNM3	-1.2565	4.90702	13.2898	0.00123983	0.0188707	3	4	Down-regulated
Sus_scrofa___NRCAM	-7.06524	2.38124	13.0845	0.00124287	0.0188707	3	4	Down-regulated
Sus_scrofa___DIP2A	-1.14511	6.70708	13.2622	0.00124472	0.0188707	3	4	Down-regulated
Sus_scrofa___STAB1	-2.49638	3.38728	12.7997	0.001245	0.0188707	3	4	Down-regulated
Sus_scrofa___EIF4E3	-0.823284	6.63158	13.2583	0.00124641	0.0188707	3	4	Down-regulated
Sus_scrofa___SRRT	-1.0601	6.17998	13.2595	0.00124645	0.0188707	3	4	Down-regulated
Sus_scrofa___BTBD8	-2.01438	4.36599	13.2825	0.0012491	0.0188707	3	4	Down-regulated
Sus_scrofa___GZMH	-5.64573	1.09599	12.334	0.00124931	0.0188707	3	4	Down-regulated
Sus_scrofa___HTR7	-2.05745	3.08978	12.5677	0.00125268	0.0188783	3	4	Down-regulated
Sus_scrofa___OBSCN	-5.89507	3.74184	12.9836	0.00125713	0.0189308	3	4	Down-regulated
Sus_scrofa___GNLY	-6.41466	1.07994	18.1234	0.00125928	0.0189364	3	4	Down-regulated
Sus_scrofa___AIF1L	-2.91946	2.45231	12.3905	0.00125942	0.0189364	3	4	Down-regulated
Sus_scrofa___MN1	-1.25494	5.85985	13.2131	0.00126779	0.0190187	3	4	Down-regulated
Sus_scrofa___RRAD	-8.01397	2.7586	12.8478	0.00127313	0.0190697	3	4	Down-regulated
Sus_scrofa___ENSSSCG00000003236	-2.10549	3.01889	13.0478	0.00127795	0.0190986	3	4	Down-regulated
Sus_scrofa___SLCO1A2	-2.41295	3.34613	13.1216	0.00127978	0.0191088	3	4	Down-regulated
Sus_scrofa___HBB	-2.95765	2.95095	12.8711	0.00128369	0.0191164	3	4	Down-regulated
Sus_scrofa___CABLES1	-1.60997	7.13138	13.1545	0.00129192	0.0191778	3	4	Down-regulated
Sus_scrofa___AGTR1	-2.04069	5.90162	13.1534	0.00129444	0.0191778	3	4	Down-regulated
Sus_scrofa___ERICH1	-1.1682	4.97094	13.1622	0.00129484	0.0191778	3	4	Down-regulated
Sus_scrofa___PTH1R	-1.6251	4.69205	13.1577	0.00130023	0.0192132	3	4	Down-regulated
Sus_scrofa___SIDT2	-1.56814	4.08728	13.1654	0.00130245	0.0192317	3	4	Down-regulated
Papio_anubis_SPATS2L	-3.22366	1.96787	12.3256	0.00130552	0.0192481	3	4	Down-regulated
Sus_scrofa___TIAL1	-0.871285	7.26597	13.0999	0.0013166	0.0193825	3	4	Down-regulated
Sus_scrofa___ENSSSCG00000040416	-1.16836	5.7275	13.0708	0.00133209	0.0195522	3	4	Down-regulated
Sus_scrofa___TMCO3	-1.15327	5.24086	13.0675	0.00133638	0.0196006	3	4	Down-regulated
Sus_scrofa___DEPTOR	-1.20753	6.89926	13.0379	0.00134559	0.0196917	3	4	Down-regulated
Sus_scrofa___KIDINS220	-0.82051	7.71369	13.0189	0.00135421	0.0197885	3	4	Down-regulated
Sus_scrofa___SETD3	-0.840128	7.45407	13.0053	0.00136074	0.0198399	3	4	Down-regulated
Sus_scrofa___RPA2	-2.06529	3.01778	12.8177	0.00136708	0.0199176	3	4	Down-regulated
Sus_scrofa___TMEM160	-3.00735	2.43	12.4337	0.00137823	0.0199983	3	4	Down-regulated
Sus_scrofa___XRCC1	-1.35585	4.55213	12.991	0.0013787	0.0199983	3	4	Down-regulated
Sus_scrofa___SMARCA2	-0.868768	7.73915	12.9591	0.00138282	0.0200083	3	4	Down-regulated
Sus_scrofa___TBC1D12	-0.801011	6.947	12.9588	0.0013832	0.0200083	3	4	Down-regulated
Sus_scrofa___ASTN1	-2.31273	2.77916	12.3975	0.00138424	0.0200083	3	4	Down-regulated
Sus_scrofa___SMOC1	-1.43701	8.0352	12.9557	0.00138447	0.0200083	3	4	Down-regulated
Sus_scrofa___MYO6	-0.970752	6.86553	12.9452	0.00138983	0.0200565	3	4	Down-regulated
Sus_scrofa___MAP3K3	-1.0908	5.76671	12.9459	0.0013912	0.0200615	3	4	Down-regulated
Sus_scrofa___TRIM7	-5.83029	1.01661	12.1243	0.00141278	0.0203281	3	4	Down-regulated
Sus_scrofa___DDR2	-0.946131	8.9912	12.8486	0.00143729	0.0205459	3	4	Down-regulated
Sus_scrofa___CYP39A1	-1.34075	6.15594	12.8159	0.00145512	0.0207107	3	4	Down-regulated
Sus_scrofa___DMXL2	-1.45959	4.8458	12.8132	0.00146365	0.0207872	3	4	Down-regulated
Sus_scrofa___SEMA4C	-1.47652	3.926	12.8215	0.00146931	0.0208327	3	4	Down-regulated
Sus_scrofa___CEP120	-0.848822	7.53731	12.7653	0.00148013	0.0209309	3	4	Down-regulated
Sus_scrofa___SRSF5	-0.997248	7.72616	12.7624	0.0014816	0.0209367	3	4	Down-regulated
Sus_scrofa___DCN	-1.36254	9.50535	12.7177	0.00150497	0.0211759	3	4	Down-regulated
Sus_scrofa___ZCCHC14	-0.875765	7.67212	12.7055	0.00151161	0.0212541	3	4	Down-regulated
Sus_scrofa___TAFA5	-2.34991	2.98672	12.4188	0.00151556	0.0212944	3	4	Down-regulated
Sus_scrofa___BTG4	-2.95281	2.46193	12.2253	0.00152022	0.0213295	3	4	Down-regulated
Sus_scrofa___SNAPC4	-1.55054	4.90625	12.6962	0.00152562	0.0213441	3	4	Down-regulated
Sus_scrofa___PAF1	-1.45301	4.02566	12.7037	0.00152774	0.0213441	3	4	Down-regulated
Sus_scrofa___RUNDC3B	-2.75919	3.93694	12.6562	0.00152775	0.0213441	3	4	Down-regulated
Papio_anubis_SESTD1	-3.27902	2.28474	12.012	0.00152991	0.0213592	3	4	Down-regulated
Sus_scrofa___GOLIM4	-1.1639	6.72185	12.6608	0.00153605	0.0213957	3	4	Down-regulated
Sus_scrofa___SH2D3A	-2.46866	1.96372	11.8501	0.0015403	0.0214285	3	4	Down-regulated
Sus_scrofa___ACCS	-1.12439	5.55696	12.6451	0.00154692	0.0214902	3	4	Down-regulated
Sus_scrofa___ENSSSCG00000013788	-2.22473	2.13708	11.699	0.00155621	0.0215888	3	4	Down-regulated
Sus_scrofa___TIAM1	-1.77352	6.2515	12.62	0.00155905	0.0215938	3	4	Down-regulated
Sus_scrofa___PTPRC	-2.3338	5.59145	12.619	0.00156776	0.0216601	3	4	Down-regulated
Sus_scrofa___PER2	-1.93753	5.63586	12.6078	0.00156794	0.0216601	3	4	Down-regulated
Sus_scrofa___PKP2	-7.31529	2.35865	12.3248	0.0015707	0.0216633	3	4	Down-regulated
Sus_scrofa___OSBPL10	-1.03408	6.29095	12.5972	0.00157137	0.0216633	3	4	Down-regulated
Sus_scrofa___ADCY5	-2.74724	4.20963	12.588	0.00157146	0.0216633	3	4	Down-regulated
Sus_scrofa___NUDT16L1	-3.56309	2.13832	12.0053	0.00157377	0.02168	3	4	Down-regulated
Sus_scrofa___ANKRD39	-5.92492	3.13851	12.4627	0.0015765	0.0216967	3	4	Down-regulated
Sus_scrofa___RBL2	-0.968012	6.26573	12.5848	0.00157828	0.0216967	3	4	Down-regulated
Sus_scrofa___PRKCZ	-1.99542	2.96757	12.4675	0.00158636	0.0217926	3	4	Down-regulated
Sus_scrofa___TNNC1	-4.44419	5.43166	12.5298	0.00159188	0.0218379	3	4	Down-regulated
Sus_scrofa___CERS6	-2.24085	4.91759	12.5645	0.00159749	0.0218997	3	4	Down-regulated
Sus_scrofa___KIF3A	-0.783427	6.95219	12.5452	0.00159993	0.0219003	3	4	Down-regulated
Sus_scrofa___DGKA	-1.27327	5.04018	12.5573	0.00160008	0.0219003	3	4	Down-regulated
Sus_scrofa___ADCY9	-0.837882	7.60961	12.5431	0.00160087	0.0219003	3	4	Down-regulated
Sus_scrofa___TTC16	-3.73895	1.87101	11.6535	0.00160338	0.0219196	3	4	Down-regulated
Sus_scrofa___ENSSSCG00000039407	-5.36022	0.898293	14.0552	0.00161288	0.0220049	3	4	Down-regulated
Sus_scrofa___ADAMTS19	-2.0022	7.35745	12.5223	0.00161297	0.0220049	3	4	Down-regulated
Sus_scrofa___IFFO1	-1.35042	5.01485	12.5217	0.00161956	0.0220551	3	4	Down-regulated
Sus_scrofa___MINK1	-1.29977	4.68551	12.5286	0.00162016	0.0220551	3	4	Down-regulated
Sus_scrofa___DUOX2	-3.84783	2.68687	11.7439	0.00162112	0.0220551	3	4	Down-regulated
Sus_scrofa___ENSSSCG00000040556	-1.87907	3.33129	12.4683	0.0016274	0.0221252	3	4	Down-regulated
Sus_scrofa___CATSPERG	-1.29708	5.41735	12.4935	0.00163301	0.0221401	3	4	Down-regulated
Sus_scrofa___ENSSSCG00000013436	-4.33027	4.29869	12.3792	0.00163392	0.0221401	3	4	Down-regulated
Sus_scrofa___ZFYVE21	-1.63514	3.26452	12.4386	0.00163606	0.0221513	3	4	Down-regulated
Sus_scrofa___USP22	-0.962773	5.31036	12.4859	0.00163864	0.0221582	3	4	Down-regulated
Sus_scrofa___ZDHHC4	-1.41283	5.6984	12.476	0.00164181	0.0221685	3	4	Down-regulated
Sus_scrofa___ENSSSCG00000050958	-2.5406	2.15708	11.6867	0.00164182	0.0221685	3	4	Down-regulated
Sus_scrofa___CACNB2	-2.62938	7.9377	12.4676	0.00164436	0.0221877	3	4	Down-regulated
Sus_scrofa___P2RY1	-4.78778	2.21091	12.0307	0.00165442	0.0222776	3	4	Down-regulated
Sus_scrofa___SCIMP	-5.88114	1.24486	11.6043	0.00165936	0.022329	3	4	Down-regulated
Sus_scrofa___BANP	-1.13329	6.21969	12.4399	0.00166171	0.0223431	3	4	Down-regulated
Sus_scrofa___CD6	-5.13037	0.777586	13.0275	0.00166733	0.0223903	3	4	Down-regulated
Sus_scrofa___CADM1	-2.55297	5.1239	12.4389	0.00167098	0.022424	3	4	Down-regulated
Sus_scrofa___SRPK3	-5.94813	1.78545	11.5377	0.00167742	0.0224952	3	4	Down-regulated
Sus_scrofa___DBP	-3.213	1.71456	11.3283	0.00168079	0.0225251	3	4	Down-regulated
Sus_scrofa___ENSSSCG00000035989	-2.47784	1.97443	11.4967	0.00168318	0.0225418	3	4	Down-regulated
Sus_scrofa___NAGK	-0.917278	5.98219	12.3829	0.00169605	0.0226211	3	4	Down-regulated
Sus_scrofa___TXK	-1.95693	1.88889	11.4866	0.00170443	0.0226618	3	4	Down-regulated
Sus_scrofa___LGALS2	-3.69767	1.75369	11.6664	0.00170728	0.0226732	3	4	Down-regulated
Sus_scrofa___ENSSSCG00000004598	-5.77954	2.97901	12.2733	0.00170793	0.0226732	3	4	Down-regulated
Sus_scrofa___GPS2	-1.18876	5.65869	12.3509	0.00171689	0.0227463	3	4	Down-regulated
Sus_scrofa___CELSR1	-3.29731	2.39041	11.842	0.0017317	0.0228963	3	4	Down-regulated
Sus_scrofa___ENSSSCG00000016810	-2.09168	5.3538	12.2807	0.00176362	0.0232404	3	4	Down-regulated
Sus_scrofa___P2RY8	-2.64228	1.64742	11.2691	0.00177699	0.023401	3	4	Down-regulated
Sus_scrofa___SCML2	-1.22578	5.35768	12.2426	0.0017863	0.0234679	3	4	Down-regulated
Sus_scrofa___RINL	-1.54146	4.12051	12.2581	0.00178987	0.0234691	3	4	Down-regulated
Sus_scrofa___NCALD	-1.6863	6.11275	12.2011	0.00180957	0.0236405	3	4	Down-regulated
Sus_scrofa___ENSSSCG00000044127	-1.0022	7.01742	12.1976	0.00181076	0.0236405	3	4	Down-regulated
Sus_scrofa___NLRC3	-3.26203	1.9108	11.3507	0.00181502	0.023651	3	4	Down-regulated
Sus_scrofa___NIPAL4	-3.57671	3.17761	11.9175	0.00181521	0.023651	3	4	Down-regulated
Sus_scrofa___S100A1	-3.09522	2.04778	11.2338	0.00181912	0.0236583	3	4	Down-regulated
Sus_scrofa___ZFP69B	-1.26432	5.14024	12.1643	0.00183859	0.0237802	3	4	Down-regulated
Sus_scrofa___NME9	-2.874	1.95233	11.2694	0.00184769	0.0238544	3	4	Down-regulated
Sus_scrofa___ADAMTS15	-2.07736	4.80717	12.1254	0.00186803	0.0240539	3	4	Down-regulated
Sus_scrofa___SAT1	-1.30063	9.06212	12.0942	0.00187881	0.0241612	3	4	Down-regulated
Sus_scrofa___SEMA6C	-2.3516	3.00008	11.919	0.00188317	0.02417	3	4	Down-regulated
Sus_scrofa___RAB3GAP2	-0.654382	8.31613	12.0698	0.00189536	0.0242633	3	4	Down-regulated
Sus_scrofa___IGF1R	-1.2211	9.49912	12.0606	0.00190158	0.0242748	3	4	Down-regulated
Sus_scrofa___CCBE1	-1.32262	10.6024	12.0423	0.00191413	0.0243456	3	4	Down-regulated
Sus_scrofa___PROX1	-6.21266	1.69397	11.3778	0.00192326	0.0244302	3	4	Down-regulated
Sus_scrofa___FGD3	-1.77875	2.34786	11.4741	0.00192976	0.0244554	3	4	Down-regulated
Sus_scrofa___ENSSSCG00000033570	-1.5636	3.73705	12.022	0.00193782	0.0245047	3	4	Down-regulated
Papio_anubis_PTBP2	-3.86052	1.93511	11.3376	0.00195137	0.0246287	3	4	Down-regulated
Sus_scrofa___PRCP	-1.76464	4.63861	11.993	0.00196105	0.024735	3	4	Down-regulated
Sus_scrofa___LAIR1	-3.61234	1.44669	11.9236	0.00196452	0.0247631	3	4	Down-regulated
Sus_scrofa___NUP210	-5.84891	1.1302	11.6141	0.00196674	0.0247749	3	4	Down-regulated
Sus_scrofa___DUSP28	-1.15484	5.13688	11.9734	0.00196891	0.0247749	3	4	Down-regulated
Sus_scrofa___CD96	-4.97553	1.12458	10.9403	0.00196988	0.0247749	3	4	Down-regulated
Sus_scrofa___DGKG	-2.56959	2.79476	11.7273	0.00197061	0.0247749	3	4	Down-regulated
Sus_scrofa___SNX29	-1.01846	7.66468	11.9029	0.00201305	0.0251657	3	4	Down-regulated
Sus_scrofa___ZFHX3	-1.02931	8.33109	11.898	0.00201653	0.0251712	3	4	Down-regulated
Sus_scrofa___EXOC2	-0.650364	8.07952	11.8969	0.00201732	0.0251712	3	4	Down-regulated
Sus_scrofa___PCBP4	-1.23891	4.83042	11.908	0.0020192	0.0251714	3	4	Down-regulated
Sus_scrofa___ARHGAP6	-1.18656	8.21699	11.8904	0.00202205	0.0251824	3	4	Down-regulated
Sus_scrofa___TARDBP	-0.847393	6.48038	11.8668	0.00204024	0.0253612	3	4	Down-regulated
Sus_scrofa___TESK2	-1.23768	4.95485	11.8792	0.00204026	0.0253612	3	4	Down-regulated
Sus_scrofa___ANO4	-2.57633	5.24525	11.8684	0.00205057	0.0254733	3	4	Down-regulated
Sus_scrofa___NRDE2	-0.950711	5.54034	11.8537	0.00205342	0.0254756	3	4	Down-regulated
Sus_scrofa___ITK	-3.61947	1.34687	11.2454	0.00207444	0.0256728	3	4	Down-regulated
Sus_scrofa___PRPF6	-0.943915	5.92336	11.8154	0.00207977	0.0256736	3	4	Down-regulated
Sus_scrofa___ENSSSCG00000012238	-2.77377	4.36171	11.8202	0.0020802	0.0256736	3	4	Down-regulated
Sus_scrofa___SLC16A2	-1.29728	4.34651	11.833	0.00208174	0.0256736	3	4	Down-regulated
Sus_scrofa___CPE	-2.01145	2.82963	11.6791	0.00208231	0.0256736	3	4	Down-regulated
Sus_scrofa___ENSSSCG00000024500	-1.38058	4.0985	11.8271	0.00209177	0.0257741	3	4	Down-regulated
Sus_scrofa___RHEX	-5.97651	0.971363	12.6596	0.00209323	0.025776	3	4	Down-regulated
Sus_scrofa___PROM1	-1.99081	4.34844	11.8156	0.00209579	0.0257802	3	4	Down-regulated
Sus_scrofa___GP91-PHOX	-3.45115	1.78111	11.4616	0.00210054	0.0258177	3	4	Down-regulated
Sus_scrofa___ENSSSCG00000015632	-5.05956	2.13502	11.1205	0.00210303	0.0258322	3	4	Down-regulated
Sus_scrofa___RGS18	-5.42243	1.26047	11.6087	0.00211982	0.026006	3	4	Down-regulated
Sus_scrofa___ENSSSCG00000038455	-8.24823	2.95596	11.7726	0.00212277	0.0260261	3	4	Down-regulated
Sus_scrofa___CERT1	-1.02438	7.51865	11.7274	0.00214536	0.0262541	3	4	Down-regulated
Sus_scrofa___PGBD2	-2.0584	2.69443	11.5102	0.00214893	0.0262651	3	4	Down-regulated
Sus_scrofa___GRM7	-2.86663	5.94453	11.7272	0.00215065	0.0262699	3	4	Down-regulated
Sus_scrofa___CCDC88C	-2.07411	2.93388	11.4752	0.00215484	0.0263048	3	4	Down-regulated
Sus_scrofa___GID8	-1.05067	5.79314	11.7041	0.00216638	0.0264183	3	4	Down-regulated
Sus_scrofa___RSRP1	-1.08754	6.18689	11.6946	0.00217236	0.0264532	3	4	Down-regulated
Sus_scrofa___ITGB2	-3.21977	1.28625	11.1385	0.00218181	0.0265354	3	4	Down-regulated
Sus_scrofa___F2	-4.88447	1.60134	10.9291	0.00219969	0.0266871	3	4	Down-regulated
Sus_scrofa___SLC44A5	-7.28693	2.47166	11.5946	0.00223246	0.0269128	3	4	Down-regulated
Sus_scrofa___ENSSSCG00000010190	-4.89407	4.83355	11.567	0.00224296	0.0269799	3	4	Down-regulated
Sus_scrofa___MAGI2	-1.00434	9.09077	11.5873	0.00225746	0.0271046	3	4	Down-regulated
Sus_scrofa___CD3E	-3.02442	1.16268	10.6327	0.00227845	0.0273233	3	4	Down-regulated
Sus_scrofa___PPP1R1C	-2.28313	4.60488	11.5741	0.00228042	0.0273305	3	4	Down-regulated
Sus_scrofa___L2HGDH	-1.03189	6.29268	11.5494	0.00229017	0.0274139	3	4	Down-regulated
Sus_scrofa___C11orf53	-2.32629	1.80119	10.5424	0.0022959	0.0274492	3	4	Down-regulated
Sus_scrofa___PPP1R16B	-2.72092	4.3903	11.5431	0.00229883	0.0274676	3	4	Down-regulated
Sus_scrofa___ADSS1	-6.52141	1.55282	10.6981	0.00230363	0.0275044	3	4	Down-regulated
Sus_scrofa___IL12RB1	-3.58652	1.18563	10.6768	0.00230493	0.0275044	3	4	Down-regulated
Sus_scrofa___ASTN2	-1.22404	5.92512	11.5327	0.00230609	0.0275044	3	4	Down-regulated
Sus_scrofa___OSM	-2.20384	2.86933	11.3782	0.0023083	0.0275084	3	4	Down-regulated
Sus_scrofa___PTPRS	-1.04923	7.23061	11.5187	0.00231512	0.0275202	3	4	Down-regulated
Sus_scrofa___SLC35F3	-2.70306	5.94603	11.527	0.00232168	0.0275405	3	4	Down-regulated
Sus_scrofa___ENSSSCG00000014041	-2.60515	2.67417	11.1462	0.00235394	0.0278728	3	4	Down-regulated
Sus_scrofa___ENSSSCG00000023014	-3.5452	2.27134	10.6521	0.00237595	0.0280158	3	4	Down-regulated
Sus_scrofa___SLA-DRB1	-2.68544	3.03973	11.2965	0.00238227	0.0280567	3	4	Down-regulated
Sus_scrofa___RNF217	-0.871615	7.62371	11.4155	0.00240425	0.0282818	3	4	Down-regulated
Sus_scrofa___SLC9C2	-2.00733	2.72379	11.1844	0.00241088	0.0283261	3	4	Down-regulated
Sus_scrofa___MFAP3L	-2.3945	2.53672	11.013	0.00241473	0.0283544	3	4	Down-regulated
Sus_scrofa___PREX2	-1.22055	7.69566	11.4001	0.00241793	0.0283554	3	4	Down-regulated
[truncated: 298 more rows]

## Sheet: Mural cells
Gene	logFC	logCPM	F	PValue	FDR	Observations_PCMV	Observations_Control	level
Sus_scrofa___hCD46	9.5225	8.08994	144.331	2.10677e-13	3.40518e-09	3	4	Up-regulated
Sus_scrofa___ENSSSCG00000016868	4.50918	7.51869	65.1088	1.66943e-09	6.74574e-06	3	4	Up-regulated
Sus_scrofa___PLOD2	3.07327	9.06308	58.5216	5.64669e-09	1.28905e-05	3	4	Up-regulated
Sus_scrofa___SLC7A2	4.22116	7.21559	57.5081	6.63801e-09	1.28905e-05	3	4	Up-regulated
Sus_scrofa___PLSCR4	2.57821	9.07403	57.2477	7.17778e-09	1.28905e-05	3	4	Up-regulated
Sus_scrofa___ACKR2	4.588	7.11217	53.8768	1.09802e-08	1.61238e-05	3	4	Up-regulated
Sus_scrofa___ENSSSCG00000032436	5.17955	6.11269	52.3545	1.18359e-08	1.61238e-05	3	4	Up-regulated
Sus_scrofa___BST2	6.03481	6.25628	48.3312	2.12688e-08	2.64436e-05	3	4	Up-regulated
Sus_scrofa___ZNF662	3.5282	7.16127	46.2863	6.69602e-08	7.21519e-05	3	4	Up-regulated
Sus_scrofa___SPATA5	2.42651	8.32458	44.8511	9.44807e-08	7.85085e-05	3	4	Up-regulated
Sus_scrofa___ZMAT3	5.71951	4.89624	42.0672	9.76013e-08	7.85085e-05	3	4	Up-regulated
Sus_scrofa___ENSSSCG00000009240	4.50834	5.30635	40.2762	1.21681e-07	8.7801e-05	3	4	Up-regulated
Sus_scrofa___ENSSSCG00000016263	3.25101	7.8352	42.2119	1.74114e-07	0.000100508	3	4	Up-regulated
Sus_scrofa___PFKFB3	2.71513	7.23762	41.1318	2.24103e-07	0.000116845	3	4	Up-regulated
Sus_scrofa___CBLB	2.27678	9.53127	40.19	2.75397e-07	0.000139044	3	4	Up-regulated
Sus_scrofa___IGFBP2	3.94905	7.244	39.7867	2.83885e-07	0.000139044	3	4	Up-regulated
Sus_scrofa___ZNFX1	3.17818	7.58655	39.8654	3.03204e-07	0.000144138	3	4	Up-regulated
Sus_scrofa___DDX60	5.95101	6.65786	36.916	3.40417e-07	0.000157205	3	4	Up-regulated
Sus_scrofa___F3	5.46986	6.22087	37.5069	3.71635e-07	0.000157821	3	4	Up-regulated
Sus_scrofa___ISG15	6.9052	6.76978	37.2865	3.79641e-07	0.000157821	3	4	Up-regulated
Sus_scrofa___RSAD2	6.76533	6.58318	36.4309	3.81962e-07	0.000157821	3	4	Up-regulated
Sus_scrofa___ENO1	3.89716	7.01187	38.3707	4.06042e-07	0.000157821	3	4	Up-regulated
Sus_scrofa___LGALS3BP	5.03292	4.80336	35.4745	4.18078e-07	0.000157821	3	4	Up-regulated
Sus_scrofa___CXCL10	5.14835	4.88916	34.2581	4.19867e-07	0.000157821	3	4	Up-regulated
Sus_scrofa___MX1	4.78819	7.78512	37.0964	5.8848e-07	0.000202374	3	4	Up-regulated
Sus_scrofa___SPOCK1	3.80314	7.55885	36.7645	6.43062e-07	0.000212119	3	4	Up-regulated
Sus_scrofa___CMPK2	6.2277	6.06956	33.4081	8.79729e-07	0.000253912	3	4	Up-regulated
Sus_scrofa___SOCS5	1.93794	8.73471	34.6743	1.08105e-06	0.000291217	3	4	Up-regulated
Sus_scrofa___PLAC9	4.4959	5.31233	32.3359	1.28284e-06	0.000329118	3	4	Up-regulated
Sus_scrofa___HSPA5	3.83297	5.60539	31.9419	1.48671e-06	0.000358653	3	4	Up-regulated
Sus_scrofa___OSMR	2.30488	7.58017	31.6885	2.40159e-06	0.000517558	3	4	Up-regulated
Sus_scrofa___ENSSSCG00000001229	2.78399	8.41961	31.0848	2.802e-06	0.000588165	3	4	Up-regulated
Sus_scrofa___HIF1A	2.43775	7.61233	31.0533	2.84919e-06	0.000588251	3	4	Up-regulated
Sus_scrofa___IRS1	3.19401	6.66394	30.8927	2.96646e-06	0.000588251	3	4	Up-regulated
Sus_scrofa___PSMB9	3.79719	4.70816	28.288	3.10645e-06	0.000603081	3	4	Up-regulated
Sus_scrofa___CEP70	2.92882	5.78871	29.7996	3.21734e-06	0.000604672	3	4	Up-regulated
Sus_scrofa___BNIP3	3.08616	7.1382	30.0256	3.7525e-06	0.000673907	3	4	Up-regulated
Sus_scrofa___TRIM9	3.31862	6.15354	29.0753	4.87031e-06	0.000855639	3	4	Up-regulated
Sus_scrofa___ISG12(A)	4.98884	6.99997	29.1477	5.02123e-06	0.000864383	3	4	Up-regulated
Sus_scrofa___ENSSSCG00000014672	4.00967	5.55527	27.8268	5.38058e-06	0.000887412	3	4	Up-regulated
Sus_scrofa___FAM13A	1.83477	9.10234	28.317	6.05035e-06	0.000977919	3	4	Up-regulated
Sus_scrofa___MX2	5.60387	8.29616	27.1237	7.71255e-06	0.00122214	3	4	Up-regulated
Sus_scrofa___PSMD14	2.17213	6.63195	27.0439	8.87578e-06	0.00136628	3	4	Up-regulated
Sus_scrofa___ELL2	3.20832	7.2002	26.2242	1.10873e-05	0.00162912	3	4	Up-regulated
Sus_scrofa___ZBP1	3.26115	6.01655	25.6574	1.23598e-05	0.00177192	3	4	Up-regulated
Sus_scrofa___C9orf85	2.88657	5.05968	24.9451	1.27429e-05	0.00177192	3	4	Up-regulated
Sus_scrofa___FKBP5	2.2003	9.43517	25.7265	1.28756e-05	0.00177192	3	4	Up-regulated
Sus_scrofa___HERC6	3.59319	8.72834	25.7002	1.30117e-05	0.00177192	3	4	Up-regulated
Sus_scrofa___PRRG1	3.10655	6.16687	25.4895	1.30458e-05	0.00177192	3	4	Up-regulated
Sus_scrofa___KHDRBS3	4.30167	6.32002	24.9649	1.49043e-05	0.00194273	3	4	Up-regulated
Sus_scrofa___DDIT4	3.08675	7.14761	25.1344	1.55907e-05	0.00196252	3	4	Up-regulated
Sus_scrofa___PPP3CA	1.40152	9.34802	25.068	1.56847e-05	0.00196252	3	4	Up-regulated
Sus_scrofa___NEDD9	2.31929	7.21974	25.0082	1.61214e-05	0.00198909	3	4	Up-regulated
Sus_scrofa___ENSSSCG00000034570	5.5189	7.85908	24.3551	1.89571e-05	0.0021886	3	4	Up-regulated
Sus_scrofa___IFIT1	3.68835	6.15176	24.13	1.98081e-05	0.00222332	3	4	Up-regulated
Sus_scrofa___DPH6	1.69962	6.97116	23.8141	2.31907e-05	0.00244988	3	4	Up-regulated
Sus_scrofa___PARP12	3.033	6.94546	23.7579	2.37525e-05	0.00249294	3	4	Up-regulated
Sus_scrofa___ADAMTS3	4.23166	6.25673	23.2498	2.39838e-05	0.00249483	3	4	Up-regulated
Sus_scrofa___SMARCD3	2.17609	6.64372	23.5601	2.52223e-05	0.00254793	3	4	Up-regulated
Sus_scrofa___ENSSSCG00000044574	3.79341	4.78833	21.2845	2.83479e-05	0.00276389	3	4	Up-regulated
Sus_scrofa___SNX10	2.24804	7.35647	23.1379	2.86302e-05	0.00277095	3	4	Up-regulated
Sus_scrofa___CHSY1	1.99785	8.07183	22.9827	2.99296e-05	0.00287948	3	4	Up-regulated
Sus_scrofa___NAB1	1.82905	6.85268	22.9575	3.03485e-05	0.00290251	3	4	Up-regulated
Sus_scrofa___TMEM165	2.75871	5.58212	22.498	3.11477e-05	0.00296141	3	4	Up-regulated
Sus_scrofa___CCDC194	4.7124	3.95293	21.4426	3.15176e-05	0.00297906	3	4	Up-regulated
Sus_scrofa___PARP14	4.28693	6.53473	22.2758	3.44709e-05	0.00313007	3	4	Up-regulated
Sus_scrofa___ACBD3	1.84856	6.91383	22.2957	3.74002e-05	0.00334434	3	4	Up-regulated
Sus_scrofa___EIF2AK2	3.02557	8.32906	22.2072	3.8151e-05	0.00338366	3	4	Up-regulated
Sus_scrofa___CTPS1	3.72295	5.45038	21.3517	3.83104e-05	0.00338366	3	4	Up-regulated
Sus_scrofa___LIN7A	2.73036	5.90612	22.0282	3.93107e-05	0.00342352	3	4	Up-regulated
Sus_scrofa___ENSSSCG00000017754	3.00602	5.92917	21.8108	3.99414e-05	0.00342352	3	4	Up-regulated
Sus_scrofa___SHISA5	2.4223	5.52367	21.9117	3.99475e-05	0.00342352	3	4	Up-regulated
Sus_scrofa___RYK	1.53134	7.52002	22.0612	4.00325e-05	0.00342352	3	4	Up-regulated
Sus_scrofa___IFI44	3.48082	7.12235	21.989	4.12559e-05	0.00347858	3	4	Up-regulated
Sus_scrofa___HERC5	4.29208	7.54235	21.913	4.21919e-05	0.00349717	3	4	Up-regulated
Sus_scrofa___CHIC2	1.55978	7.60693	21.6585	4.55237e-05	0.00371616	3	4	Up-regulated
Sus_scrofa___TAF4B	3.05222	5.93799	21.3449	4.58561e-05	0.00372448	3	4	Up-regulated
Sus_scrofa___ATP13A3	2.51486	6.69573	21.5671	4.7139e-05	0.00380585	3	4	Up-regulated
Sus_scrofa___PCMT1	2.0277	6.58362	21.5608	4.73288e-05	0.00380585	3	4	Up-regulated
Sus_scrofa___DTX3L	3.03982	5.67837	20.9233	5.15386e-05	0.00404378	3	4	Up-regulated
Sus_scrofa___NUFIP2	1.45017	7.66547	21.1761	5.31709e-05	0.00409239	3	4	Up-regulated
Sus_scrofa___C18orf25	2.1008	6.41188	21.0587	5.58316e-05	0.00422792	3	4	Up-regulated
Sus_scrofa___NHSL1	1.83338	8.30859	20.9328	5.74266e-05	0.00422792	3	4	Up-regulated
Sus_scrofa___PPP4R2	1.52453	6.80635	20.7418	6.17111e-05	0.00443305	3	4	Up-regulated
Sus_scrofa___SYTL4	2.1544	6.71876	20.587	6.50202e-05	0.00462961	3	4	Up-regulated
Sus_scrofa___SAMHD1	1.95962	6.70873	20.5342	6.61138e-05	0.00464608	3	4	Up-regulated
Sus_scrofa___OAS2	4.0704	8.8069	20.2739	7.14497e-05	0.00493522	3	4	Up-regulated
Sus_scrofa___C5orf24	2.19349	5.88207	20.2106	7.31105e-05	0.00500714	3	4	Up-regulated
Sus_scrofa___AKIRIN1	2.39947	5.72599	20.0337	7.6595e-05	0.00519302	3	4	Up-regulated
Sus_scrofa___SETX	2.02737	8.3714	20.0504	7.67885e-05	0.00519302	3	4	Up-regulated
Sus_scrofa___CLCA1	3.03955	5.26532	19.654	7.86546e-05	0.00529706	3	4	Up-regulated
Sus_scrofa___ATP5MC2	3.32396	4.26702	18.5511	7.92627e-05	0.00531566	3	4	Up-regulated
Sus_scrofa___GNAI1	1.86099	7.27591	19.9544	7.95886e-05	0.00531566	3	4	Up-regulated
Sus_scrofa___PSMB8	2.96877	4.78599	19.1633	8.03684e-05	0.00534565	3	4	Up-regulated
Sus_scrofa___SNX3	2.48316	5.62914	19.7204	8.42177e-05	0.00551097	3	4	Up-regulated
Sus_scrofa___KDM4C	1.54238	7.58736	19.698	8.6535e-05	0.00561713	3	4	Up-regulated
Sus_scrofa___AGFG1	1.66081	7.21947	19.5094	9.25007e-05	0.00590944	3	4	Up-regulated
Sus_scrofa___STC1	3.01996	6.1123	19.2608	9.80175e-05	0.00616443	3	4	Up-regulated
Sus_scrofa___FMO4	1.67997	7.14735	19.1344	0.000104891	0.00652061	3	4	Up-regulated
Sus_scrofa___SCFD2	1.45462	7.99226	18.8503	0.000114951	0.00695865	3	4	Up-regulated
Sus_scrofa___IGF2BP2	2.28584	7.44695	18.7351	0.000120357	0.0071422	3	4	Up-regulated
Sus_scrofa___CPM	2.05661	11.5353	18.6938	0.00012104	0.0071422	3	4	Up-regulated
Sus_scrofa___SORL1	2.76804	6.14869	18.719	0.000121077	0.0071422	3	4	Up-regulated
Sus_scrofa___TRIM22	2.60451	6.51712	18.6678	0.00012358	0.0072109	3	4	Up-regulated
Sus_scrofa___ACSL3	2.23325	7.23749	18.5738	0.000127029	0.00728075	3	4	Up-regulated
Sus_scrofa___PNPT1	2.26614	6.21333	18.5113	0.000129458	0.00739373	3	4	Up-regulated
Sus_scrofa___STK39	1.91121	9.98453	18.4064	0.000133575	0.00749642	3	4	Up-regulated
Sus_scrofa___XPC	1.92269	6.33957	18.3294	0.000138874	0.00766084	3	4	Up-regulated
Sus_scrofa___PLAA	1.87902	6.31019	18.2981	0.000140009	0.00768438	3	4	Up-regulated
Sus_scrofa___PML	2.55584	7.28048	18.2737	0.000140904	0.00769401	3	4	Up-regulated
Sus_scrofa___TRIB3	5.44779	3.85245	18.4858	0.000143919	0.0078192	3	4	Up-regulated
Sus_scrofa___PLSCR1	2.07595	6.89311	18.1782	0.000145729	0.00787766	3	4	Up-regulated
Sus_scrofa___DNAJB9	5.35216	4.33347	17.5978	0.000147327	0.00788495	3	4	Up-regulated
Sus_scrofa___SDCBP	1.82526	6.70013	18.1214	0.00014877	0.00793586	3	4	Up-regulated
Sus_scrofa___ITPR1	1.44315	10.4275	18.0199	0.000152598	0.00803403	3	4	Up-regulated
Sus_scrofa___TBC1D32	2.23238	6.02379	17.8259	0.00016028	0.0083568	3	4	Up-regulated
Sus_scrofa___B2M	1.45243	8.01761	17.8601	0.000161499	0.00839326	3	4	Up-regulated
Sus_scrofa___ARAP2	1.74845	7.52681	17.7301	0.000169547	0.00867784	3	4	Up-regulated
Sus_scrofa___IFI44L	2.61938	7.68945	17.7273	0.00016992	0.00867784	3	4	Up-regulated
Sus_scrofa___ATAD1	1.67596	7.63937	17.5752	0.000178678	0.00894312	3	4	Up-regulated
Sus_scrofa___CRACR2A	2.99075	5.37391	16.7042	0.000178718	0.00894312	3	4	Up-regulated
Sus_scrofa___ENSSSCG00000010893	2.56207	6.58787	17.4503	0.000186768	0.00912001	3	4	Up-regulated
Sus_scrofa___PI15	3.74375	6.53867	16.8984	0.000187452	0.00912589	3	4	Up-regulated
Sus_scrofa___FBXO21	1.91905	7.52279	17.4181	0.000189025	0.0091748	3	4	Up-regulated
Sus_scrofa___URI1	1.53803	7.50041	17.3562	0.000192924	0.00933602	3	4	Up-regulated
Sus_scrofa___CYP26B1	4.62491	4.54978	16.6052	0.000195482	0.00943157	3	4	Up-regulated
Sus_scrofa___IL17D	2.22956	5.91791	17.1885	0.000199856	0.00952686	3	4	Up-regulated
Sus_scrofa___UGP2	1.75493	7.16954	17.2675	0.000200014	0.00952686	3	4	Up-regulated
Sus_scrofa___TTC27	2.03571	6.48909	17.1309	0.000209981	0.00986607	3	4	Up-regulated
Sus_scrofa___ADK	2.03111	6.86321	17.0875	0.000213374	0.00999641	3	4	Up-regulated
Sus_scrofa___PDK1	2.10695	6.07596	16.9946	0.00022003	0.0101649	3	4	Up-regulated
Sus_scrofa___PAPPA	2.77721	8.32575	16.8224	0.000233111	0.0106135	3	4	Up-regulated
Sus_scrofa___ERC1	1.62695	8.63302	16.7299	0.000240143	0.010829	3	4	Up-regulated
Sus_scrofa___MDM2	1.77186	7.70688	16.7213	0.000241358	0.010829	3	4	Up-regulated
Sus_scrofa___NEO1	1.28218	8.01952	16.7156	0.000241469	0.010829	3	4	Up-regulated
Sus_scrofa___PRMT3	1.25347	7.61482	16.7153	0.000241866	0.010829	3	4	Up-regulated
Sus_scrofa___UBQLN1	1.7107	6.46554	16.7138	0.00024377	0.0108572	3	4	Up-regulated
Sus_scrofa___SNAPC1	2.22901	6.73735	16.6066	0.000252719	0.0110997	3	4	Up-regulated
Sus_scrofa___RPS9	1.79328	6.52196	16.5217	0.000261096	0.0114098	3	4	Up-regulated
Sus_scrofa___ENSSSCG00000014997	2.17706	6.10929	16.4602	0.000265807	0.0114873	3	4	Up-regulated
Sus_scrofa___DAAM1	1.5164	8.09796	16.416	0.00026877	0.0114947	3	4	Up-regulated
Sus_scrofa___ENSSSCG00000014565	2.75951	6.43801	16.3436	0.000276794	0.0118043	3	4	Up-regulated
Sus_scrofa___ENSSSCG00000000703	2.58192	4.96063	15.9562	0.000280074	0.0118388	3	4	Up-regulated
Sus_scrofa___UPP1	5.49706	4.39451	15.9389	0.000282639	0.0118966	3	4	Up-regulated
Sus_scrofa___C7	2.4477	8.48691	16.2374	0.000286662	0.0119657	3	4	Up-regulated
Sus_scrofa___MTX2	2.15823	5.98765	16.1817	0.000293659	0.0120774	3	4	Up-regulated
Sus_scrofa___EPSTI1	2.61322	7.60171	16.1377	0.000298243	0.012124	3	4	Up-regulated
Sus_scrofa___ST3GAL6	1.69182	6.56278	16.1447	0.000298524	0.012124	3	4	Up-regulated
Sus_scrofa___TRAF3IP2	1.79553	7.21388	16.1345	0.000298542	0.012124	3	4	Up-regulated
Sus_scrofa___CALU	1.50337	7.42245	16.0817	0.000303856	0.0123088	3	4	Up-regulated
Sus_scrofa___ERP29	3.51791	4.21715	15.3096	0.00030552	0.0123321	3	4	Up-regulated
Sus_scrofa___GHSR	2.63063	5.78043	15.9965	0.000306307	0.0123321	3	4	Up-regulated
Sus_scrofa___NUDT21	2.24157	5.80776	16.0421	0.000306721	0.0123321	3	4	Up-regulated
Sus_scrofa___ENSSSCG00000008222	1.4568	6.61953	16.0185	0.000312253	0.0124924	3	4	Up-regulated
Sus_scrofa___SETD6	4.06498	3.98769	15.1306	0.000314199	0.0125277	3	4	Up-regulated
Sus_scrofa___ENSSSCG00000017146	2.52671	8.20016	15.9772	0.000315119	0.0125277	3	4	Up-regulated
Sus_scrofa___MTDH	1.33443	7.63346	15.9687	0.000316083	0.0125277	3	4	Up-regulated
Sus_scrofa___EMP1	2.48082	6.69267	15.9379	0.000321068	0.0126881	3	4	Up-regulated
Sus_scrofa___USP18	3.39681	6.19441	15.8074	0.000325609	0.0127738	3	4	Up-regulated
Sus_scrofa___PPM1A	1.99056	6.07197	15.7922	0.000339259	0.0132256	3	4	Up-regulated
Sus_scrofa___GBE1	1.73114	7.68384	15.7508	0.000342307	0.0132998	3	4	Up-regulated
Sus_scrofa___SERPINE1	3.10036	7.83584	15.6956	0.000350742	0.0135948	3	4	Up-regulated
Sus_scrofa___SLC10A7	1.58692	7.38883	15.6149	0.000360556	0.0139418	3	4	Up-regulated
Sus_scrofa___RBBP9	4.86728	3.90779	14.9298	0.000368369	0.0140632	3	4	Up-regulated
Sus_scrofa___SUPT3H	1.46782	6.79257	15.5498	0.000369787	0.0140632	3	4	Up-regulated
Sus_scrofa___PLAGL1	1.48349	7.519	15.4747	0.000378551	0.0142887	3	4	Up-regulated
Sus_scrofa___VMP1	1.53906	8.05513	15.4572	0.000380729	0.0142887	3	4	Up-regulated
Sus_scrofa___CEBPD	2.64952	5.12521	15.2466	0.000380812	0.0142887	3	4	Up-regulated
Sus_scrofa___PDGFA	2.77496	5.9691	15.2644	0.00038398	0.0142887	3	4	Up-regulated
Sus_scrofa___CTTNBP2NL	1.635	6.14293	15.3662	0.000396834	0.0145846	3	4	Up-regulated
Sus_scrofa___SLC16A3	5.39675	4.489	15.191	0.000397934	0.0145846	3	4	Up-regulated
Sus_scrofa___NAMPT	2.4777	6.09806	15.2969	0.000399197	0.0145978	3	4	Up-regulated
Sus_scrofa___TOPAZ1	2.1847	6.27131	15.2705	0.000409061	0.0149247	3	4	Up-regulated
Sus_scrofa___ENSSSCG00000016629	1.6557	9.05686	15.1975	0.000418127	0.0151802	3	4	Up-regulated
Sus_scrofa___YTHDF3	1.77805	5.91503	15.205	0.000419364	0.0151802	3	4	Up-regulated
Sus_scrofa___KLHDC10	1.13882	7.62372	15.1669	0.000423538	0.0151802	3	4	Up-regulated
Sus_scrofa___PAPSS1	1.55152	7.03728	15.1749	0.000424056	0.0151802	3	4	Up-regulated
Sus_scrofa___PGK1	2.55689	5.2307	15.0113	0.00042411	0.0151802	3	4	Up-regulated
Sus_scrofa___ENSSSCG00000015814	1.30026	7.86794	15.0982	0.00043408	0.0154879	3	4	Up-regulated
Sus_scrofa___CDC42EP2	3.18159	4.37376	14.3469	0.000438572	0.0156138	3	4	Up-regulated
Sus_scrofa___SRSF10	1.37722	7.26306	15.0402	0.000444429	0.0157184	3	4	Up-regulated
Sus_scrofa___ENSSSCG00000031349	3.111	4.65855	14.5116	0.000446825	0.0157369	3	4	Up-regulated
Sus_scrofa___RCBTB1	2.00526	5.94377	15.0302	0.0004469	0.0157369	3	4	Up-regulated
Sus_scrofa___ENSSSCG00000032591	3.04011	4.32052	14.2895	0.000448994	0.0157763	3	4	Up-regulated
Sus_scrofa___ECM1	2.67251	5.03333	14.5845	0.000459569	0.0160779	3	4	Up-regulated
Sus_scrofa___RPL28	2.04867	5.9186	14.8907	0.00046914	0.0163773	3	4	Up-regulated
Sus_scrofa___PGRMC1	2.46293	5.10029	14.571	0.000489758	0.016924	3	4	Up-regulated
Sus_scrofa___SLC6A7	2.28883	5.46504	14.5259	0.000515166	0.0175667	3	4	Up-regulated
Sus_scrofa___BTG3	1.93697	6.65534	14.5866	0.000527928	0.0178612	3	4	Up-regulated
Sus_scrofa___AIMP2	3.12321	4.32267	13.7957	0.000532605	0.0179718	3	4	Up-regulated
Sus_scrofa___LRRC58	2.81582	5.02391	14.1402	0.000538376	0.0180221	3	4	Up-regulated
Sus_scrofa___CAMKMT	1.22365	7.87409	14.5069	0.000541339	0.0180221	3	4	Up-regulated
Sus_scrofa___ADAMTSL2	2.93926	4.82145	14.1723	0.000541485	0.0180221	3	4	Up-regulated
Sus_scrofa___IFIH1	2.19236	7.10728	14.5142	0.000542294	0.0180221	3	4	Up-regulated
Sus_scrofa___LAP3	1.68866	6.28851	14.5164	0.000543016	0.0180221	3	4	Up-regulated
Sus_scrofa___BACH1	1.66619	6.73222	14.465	0.000552314	0.0182931	3	4	Up-regulated
Sus_scrofa___BCL2L1	1.51301	7.03412	14.3768	0.000569809	0.0186205	3	4	Up-regulated
Sus_scrofa___ANXA5	1.33365	7.91409	14.3662	0.000570262	0.0186205	3	4	Up-regulated
Sus_scrofa___ADM	5.32864	4.30196	14.0826	0.000572308	0.0186496	3	4	Up-regulated
Sus_scrofa___YAP1	1.68423	8.12965	14.2946	0.000585644	0.0189695	3	4	Up-regulated
Sus_scrofa___PSMB2	1.58864	6.6069	14.2943	0.000589502	0.0190562	3	4	Up-regulated
Sus_scrofa___PRKD1	1.66714	7.38994	14.2469	0.000597479	0.0192372	3	4	Up-regulated
Sus_scrofa___PTAR1	2.09268	6.1853	14.2234	0.000605153	0.0193962	3	4	Up-regulated
Sus_scrofa___ENSSSCG00000029160	5.0287	5.55637	13.7106	0.000607424	0.0194028	3	4	Up-regulated
Sus_scrofa___LUZP1	1.21376	8.13005	14.1827	0.000610753	0.0194706	3	4	Up-regulated
Sus_scrofa___C7H6orf125	2.91125	4.84894	13.687	0.000623153	0.0197879	3	4	Up-regulated
Sus_scrofa___STAT1	1.53134	8.36671	14.0513	0.000641849	0.0203018	3	4	Up-regulated
Sus_scrofa___VPS37A	2.23475	5.0888	13.8997	0.000646376	0.0203701	3	4	Up-regulated
Sus_scrofa___ENSSSCG00000005508	2.13019	5.59079	13.9773	0.000657269	0.0205881	3	4	Up-regulated
Sus_scrofa___FAM111A	2.09449	4.81632	13.6221	0.00066021	0.0206304	3	4	Up-regulated
Sus_scrofa___SS18L2	2.14301	7.36719	13.9828	0.000661172	0.0206304	3	4	Up-regulated
Sus_scrofa___KLF10	2.30494	5.09316	13.7084	0.000675977	0.0210517	3	4	Up-regulated
Sus_scrofa___ATP8A2	2.70229	6.14378	13.8348	0.000685283	0.0212188	3	4	Up-regulated
Sus_scrofa___LARS1	1.29697	7.29486	13.8264	0.000700655	0.0215708	3	4	Up-regulated
Sus_scrofa___NLK	1.72929	6.90545	13.8146	0.000705842	0.0216481	3	4	Up-regulated
Sus_scrofa___ADAMTS9	1.5452	9.93587	13.7469	0.000719922	0.0220381	3	4	Up-regulated
Sus_scrofa___CYP8B1	5.29723	4.14911	13.4543	0.000724498	0.0220629	3	4	Up-regulated
Sus_scrofa___ACCSL	1.30334	8.0583	13.7145	0.00072939	0.02216	3	4	Up-regulated
Sus_scrofa___H3-5	1.43549	7.60761	13.6673	0.00074339	0.0225275	3	4	Up-regulated
Sus_scrofa___CMTM2	2.37964	4.92703	13.3069	0.000770924	0.0230749	3	4	Up-regulated
Sus_scrofa___ENSSSCG00000006418	2.20838	5.63317	13.3533	0.0007911	0.0234826	3	4	Up-regulated
Sus_scrofa___WDR17	2.0905	6.14848	13.5045	0.000793261	0.0234826	3	4	Up-regulated
Sus_scrofa___URGCP	1.92864	5.71072	13.4791	0.000795579	0.0235081	3	4	Up-regulated
Sus_scrofa___RGS2	3.61973	6.04433	13.2176	0.000831902	0.024311	3	4	Up-regulated
Sus_scrofa___JKAMP	1.99114	5.00431	13.2359	0.000834721	0.024311	3	4	Up-regulated
Sus_scrofa___ZC3HAV1	1.84326	6.93457	13.3734	0.000834825	0.024311	3	4	Up-regulated
Sus_scrofa___PTPRE	1.67687	8.40972	13.3577	0.000836289	0.024311	3	4	Up-regulated
Sus_scrofa___FOXS1	2.17684	6.48677	13.364	0.000839648	0.0243212	3	4	Up-regulated
Sus_scrofa___HIPK3	1.84485	7.71589	13.3367	0.000844013	0.0244039	3	4	Up-regulated
Sus_scrofa___MFSD12	2.59236	4.71596	12.8236	0.000864081	0.0248471	3	4	Up-regulated
Sus_scrofa___SERTAD1	5.0901	3.73079	13.0035	0.000864557	0.0248471	3	4	Up-regulated
Sus_scrofa___OLA1	1.68555	6.97643	13.2696	0.000869562	0.0248756	3	4	Up-regulated
Sus_scrofa___TAMM41	3.26423	4.45908	12.8298	0.00087309	0.0249324	3	4	Up-regulated
Sus_scrofa___USP15	1.25649	7.90675	13.2365	0.000876817	0.0249507	3	4	Up-regulated
Sus_scrofa___UBE2L6	2.51668	5.77618	13.0546	0.000917617	0.025943	3	4	Up-regulated
Sus_scrofa___PSMD1	1.43771	7.0646	13.112	0.000923394	0.0260468	3	4	Up-regulated
Sus_scrofa___ENSSSCG00000011272	2.33086	5.62032	13.0557	0.000934789	0.0262847	3	4	Up-regulated
Sus_scrofa___SLAIN2	1.49934	7.0244	13.0784	0.000935081	0.0262847	3	4	Up-regulated
Sus_scrofa___IRF7	3.41998	4.13816	12.3216	0.000945254	0.026478	3	4	Up-regulated
Sus_scrofa___CSF1	2.21034	6.02695	12.9676	0.000962254	0.0267692	3	4	Up-regulated
Sus_scrofa___PRMT2	1.54904	9.30631	12.9365	0.000983738	0.0271334	3	4	Up-regulated
pCMV_____gp45	6.35572	3.62519	14.8146	0.000997168	0.0274103	3	4	Up-regulated
Sus_scrofa___RCC1L	2.6867	4.89264	12.5874	0.00101419	0.0278308	3	4	Up-regulated
Sus_scrofa___USP53	1.7089	6.95321	12.8574	0.0010199	0.027835	3	4	Up-regulated
Sus_scrofa___TIPIN	2.06332	4.70606	12.5576	0.00102029	0.027835	3	4	Up-regulated
Sus_scrofa___DNAH12	5.21985	3.93209	12.4433	0.00102606	0.027835	3	4	Up-regulated
Sus_scrofa___ENSSSCG00000010517	2.97539	4.43726	12.1902	0.00102681	0.027835	3	4	Up-regulated
Sus_scrofa___ZCCHC7	1.07801	8.58367	12.815	0.00103169	0.027835	3	4	Up-regulated
Sus_scrofa___CSRNP1	2.95252	4.37386	12.2814	0.00103852	0.0279118	3	4	Up-regulated
pCMV_____gp73	5.58602	3.40442	14.5985	0.00103959	0.0279118	3	4	Up-regulated
Sus_scrofa___DHX58	4.48049	4.40558	12.3752	0.00107098	0.0285177	3	4	Up-regulated
Sus_scrofa___ENSSSCG00000013715	2.24378	5.58432	12.6141	0.00108652	0.0287739	3	4	Up-regulated
Sus_scrofa___ENTPD4	1.98533	5.5388	12.6232	0.00108713	0.0287739	3	4	Up-regulated
Sus_scrofa___RAP1GDS1	1.79518	5.92353	12.6075	0.00112439	0.0295987	3	4	Up-regulated
Sus_scrofa___CGAS	2.71836	4.67244	12.1187	0.00112864	0.0296622	3	4	Up-regulated
Sus_scrofa___NIFK	1.99349	5.42012	12.4164	0.00117608	0.0307734	3	4	Up-regulated
Sus_scrofa___ENSSSCG00000009072	2.46025	5.01699	12.2574	0.00117664	0.0307734	3	4	Up-regulated
Sus_scrofa___ENSSSCG00000006395	1.78461	5.65908	12.4375	0.00119299	0.0310631	3	4	Up-regulated
Sus_scrofa___ENSSSCG00000001341	1.41459	7.7605	12.4461	0.00119348	0.0310631	3	4	Up-regulated
Sus_scrofa___SUCLG2	1.29462	7.55427	12.4269	0.00120302	0.0312091	3	4	Up-regulated
Sus_scrofa___KIAA1755	1.43161	7.0852	12.4284	0.00120488	0.0312091	3	4	Up-regulated
Sus_scrofa___VCL	1.6386	9.22919	12.3912	0.0012181	0.0313006	3	4	Up-regulated
Sus_scrofa___SLC25A6	2.51709	5.10551	12.2266	0.00122871	0.0314732	3	4	Up-regulated
Sus_scrofa___PTGER4	1.87172	5.11282	12.2778	0.00123932	0.0315948	3	4	Up-regulated
Sus_scrofa___ZBTB38	1.33922	7.51344	12.3223	0.0012535	0.0318559	3	4	Up-regulated
pCMV_____gp26	5.83241	3.46515	13.9319	0.0012925	0.0323491	3	4	Up-regulated
pCMV_____gp32	5.83241	3.46515	13.9319	0.0012925	0.0323491	3	4	Up-regulated
Sus_scrofa___RNF7	2.10051	5.0804	12.079	0.00129292	0.0323491	3	4	Up-regulated
Sus_scrofa___NOP58	1.40254	6.93944	12.2196	0.00130951	0.0326332	3	4	Up-regulated
Sus_scrofa___FBXO24	4.64587	3.98144	11.8034	0.00131614	0.0327274	3	4	Up-regulated
Sus_scrofa___ASCC3	1.10313	7.92454	12.1924	0.00131885	0.0327444	3	4	Up-regulated
Sus_scrofa___PDE4A	2.01269	6.67302	12.1852	0.00132606	0.0328728	3	4	Up-regulated
Sus_scrofa___ADD3	1.16815	9.07293	12.1501	0.00133994	0.0331153	3	4	Up-regulated
Sus_scrofa___MAP3K8	1.47344	7.31668	12.1186	0.00136098	0.0334819	3	4	Up-regulated
Sus_scrofa___S100A11	2.21985	5.17623	12.0282	0.00137562	0.0337905	3	4	Up-regulated
Sus_scrofa___ZNF140	2.39497	4.64608	11.8355	0.00137981	0.0338108	3	4	Up-regulated
Sus_scrofa___PHF11	1.13699	8.06668	12.0762	0.00138063	0.0338108	3	4	Up-regulated
Sus_scrofa___EPM2AIP1	2.20034	5.2208	11.9641	0.00139521	0.0340133	3	4	Up-regulated
Sus_scrofa___ENSSSCG00000010448	2.67529	4.40378	11.5087	0.00139975	0.0340726	3	4	Up-regulated
Sus_scrofa___ATF6	1.22764	7.74862	12.024	0.00141058	0.0341818	3	4	Up-regulated
Sus_scrofa___UNC93B1	2.35873	4.26239	11.4794	0.00141348	0.0342008	3	4	Up-regulated
Sus_scrofa___RAB5A	1.4159	6.58546	12.0221	0.00141749	0.0342464	3	4	Up-regulated
Sus_scrofa___ENSSSCG00000005247	1.79407	5.90337	12.0015	0.00142009	0.034258	3	4	Up-regulated
Sus_scrofa___P3H1	1.46909	6.91966	12.0073	0.00142433	0.0342582	3	4	Up-regulated
Sus_scrofa___RGS4	1.70979	7.27652	11.9801	0.00143829	0.0345424	3	4	Up-regulated
Sus_scrofa___YAF2	1.04551	7.95734	11.9308	0.00146299	0.0349798	3	4	Up-regulated
Sus_scrofa___TRAIP	2.30598	4.6866	11.5606	0.00146645	0.0350106	3	4	Up-regulated
Sus_scrofa___MCCC1	1.41281	7.03943	11.8917	0.00148983	0.0354119	3	4	Up-regulated
Sus_scrofa___EIF4E	1.86688	5.97639	11.8498	0.0014926	0.0354256	3	4	Up-regulated
Sus_scrofa___TMEM168	1.64387	6.09661	11.8394	0.00152478	0.0358776	3	4	Up-regulated
Sus_scrofa___RPL31	1.50751	7.7645	11.8239	0.00152814	0.0358776	3	4	Up-regulated
Sus_scrofa___ENSSSCG00000016226	1.907	5.82445	11.7753	0.00153815	0.0360307	3	4	Up-regulated
Sus_scrofa___DDB2	1.75356	6.16099	11.8079	0.0015464	0.0361715	3	4	Up-regulated
Sus_scrofa___HK2	4.55568	5.97022	11.7512	0.00155193	0.0361961	3	4	Up-regulated
Sus_scrofa___TUSC3	2.32532	6.43356	11.785	0.00155749	0.0362509	3	4	Up-regulated
Sus_scrofa___TTC39B	1.89137	6.9313	11.7803	0.00155877	0.0362509	3	4	Up-regulated
Sus_scrofa___ALS2	2.12508	5.44681	11.7277	0.00156198	0.0362618	3	4	Up-regulated
Sus_scrofa___NBAS	1.17938	7.30689	11.7691	0.00156372	0.0362618	3	4	Up-regulated
Sus_scrofa___SSR2	1.7349	5.84725	11.7474	0.00157353	0.0363329	3	4	Up-regulated
Sus_scrofa___SPOP	1.57041	6.5386	11.7239	0.0015973	0.0368289	3	4	Up-regulated
Sus_scrofa___ENSSSCG00000002459	4.91684	3.90183	11.2158	0.00160537	0.0369623	3	4	Up-regulated
Sus_scrofa___HOOK3	1.09033	7.53204	11.6571	0.00163383	0.0375263	3	4	Up-regulated
Sus_scrofa___ENSSSCG00000035856	1.69822	4.92873	11.5218	0.00163479	0.0375263	3	4	Up-regulated
Sus_scrofa___PTX3	5.23264	4.20704	11.9595	0.00163915	0.0375263	3	4	Up-regulated
Sus_scrofa___CHORDC1	1.50897	6.62171	11.6539	0.00164257	0.0375502	3	4	Up-regulated
Sus_scrofa___ERRFI1	1.49305	6.84749	11.6365	0.00165352	0.0376421	3	4	Up-regulated
Sus_scrofa___PPIB	2.57226	4.82858	11.321	0.00169292	0.0383767	3	4	Up-regulated
Sus_scrofa___PLAU	2.26426	5.11617	11.4492	0.00170266	0.038393	3	4	Up-regulated
Sus_scrofa___NETO2	1.9711	5.38619	11.47	0.00171212	0.0385394	3	4	Up-regulated
Sus_scrofa___HSP90AB1	1.76015	6.0373	11.5241	0.00172684	0.0387651	3	4	Up-regulated
Sus_scrofa___CCL2	2.99474	5.62896	11.4187	0.00173503	0.0388485	3	4	Up-regulated
Sus_scrofa___EXOC5	1.49678	6.91934	11.4563	0.00177622	0.0394898	3	4	Up-regulated
Sus_scrofa___POLR1F	1.50783	6.24658	11.4558	0.00177927	0.0395032	3	4	Up-regulated
Sus_scrofa___NMI	1.83592	5.61625	11.3966	0.00179153	0.0396418	3	4	Up-regulated
Sus_scrofa___BIRC3	1.37687	7.73289	11.3595	0.00184189	0.0403393	3	4	Up-regulated
Sus_scrofa___KANK2	1.25805	7.05736	11.3201	0.00187442	0.04082	3	4	Up-regulated
Sus_scrofa___ENSSSCG00000037510	1.80947	5.87011	11.2945	0.00189389	0.0411437	3	4	Up-regulated
Sus_scrofa___HSD17B12	1.60379	6.14942	11.2634	0.00192479	0.0415353	3	4	Up-regulated
Sus_scrofa___PSMD7	2.23038	4.78897	11.0062	0.00192923	0.0415353	3	4	Up-regulated
Sus_scrofa___CCND1	2.09853	6.27502	11.2515	0.0019299	0.0415353	3	4	Up-regulated
Sus_scrofa___AGPAT2	1.80698	5.89277	11.2018	0.00196125	0.042098	3	4	Up-regulated
Sus_scrofa___SLC39A14	1.26094	8.9537	11.19	0.00197143	0.0421522	3	4	Up-regulated
Sus_scrofa___NECTIN1	3.16637	4.15466	10.6112	0.00197161	0.0421522	3	4	Up-regulated
Sus_scrofa___UBE2D3	1.34022	6.55963	11.1803	0.00198913	0.0424147	3	4	Up-regulated
Sus_scrofa___TRIM44	1.19297	7.7935	11.1297	0.00202211	0.0427881	3	4	Up-regulated
Sus_scrofa___PSMF1	1.86253	6.38239	11.1397	0.00202253	0.0427881	3	4	Up-regulated
Sus_scrofa___ST8SIA4	1.59054	7.43825	11.1248	0.00202811	0.0428093	3	4	Up-regulated
Sus_scrofa___CTDSPL	1.06625	9.48488	11.1166	0.00203095	0.0428093	3	4	Up-regulated
Sus_scrofa___HMBOX1	1.0629	7.77601	11.1184	0.00203147	0.0428093	3	4	Up-regulated
Sus_scrofa___ETV7	1.66209	6.20318	11.0994	0.00205505	0.0431934	3	4	Up-regulated
Sus_scrofa___CLASP2	0.990783	8.87313	11.0546	0.00208328	0.0434302	3	4	Up-regulated
Sus_scrofa___CBLL1	2.22443	5.28553	10.9928	0.002087	0.0434302	3	4	Up-regulated
Sus_scrofa___ENSSSCG00000037274	1.10753	7.58432	10.9982	0.00213398	0.0441632	3	4	Up-regulated
Sus_scrofa___MYO1D	1.20831	9.70931	10.918	0.00220286	0.0452988	3	4	Up-regulated
Sus_scrofa___USP25	1.05312	8.3248	10.908	0.00221278	0.0453929	3	4	Up-regulated
Sus_scrofa___AMMECR1	1.82271	5.68624	10.9022	0.00221306	0.0453929	3	4	Up-regulated
Sus_scrofa___DDX3X	1.1501	7.78119	10.8983	0.00222251	0.045529	3	4	Up-regulated
Sus_scrofa___TMUB1	4.60059	3.68092	10.4641	0.00224004	0.0457722	3	4	Up-regulated
Sus_scrofa___GNL3	2.04388	5.6913	10.8164	0.00225174	0.0458987	3	4	Up-regulated
Sus_scrofa___METTL15	1.71805	6.0495	10.8776	0.00225191	0.0458987	3	4	Up-regulated
Sus_scrofa___LPCAT3	2.01428	5.00109	10.7516	0.00225679	0.0459402	3	4	Up-regulated
Sus_scrofa___MRPS27	1.36591	7.00905	10.8304	0.00229296	0.0465007	3	4	Up-regulated
Sus_scrofa___NPM1	1.50976	6.16446	10.8202	0.00230777	0.0467208	3	4	Up-regulated
Sus_scrofa___ENSSSCG00000038829	2.16884	4.94003	10.681	0.00231248	0.0467208	3	4	Up-regulated
Sus_scrofa___EFL1	1.37484	6.36448	10.758	0.00236499	0.0476031	3	4	Up-regulated
Sus_scrofa___ENSSSCG00000017103	3.58295	4.08483	10.3684	0.00237444	0.0477083	3	4	Up-regulated
Sus_scrofa___NSRP1	1.10771	6.95677	10.7421	0.00237612	0.0477083	3	4	Up-regulated
Sus_scrofa___BTG1	2.17673	6.88463	10.7093	0.00241157	0.0483002	3	4	Up-regulated
Sus_scrofa___HDHD2	2.13325	4.86655	10.4096	0.00245895	0.0490667	3	4	Up-regulated
Sus_scrofa___DNAJC24	1.89279	5.34573	10.5847	0.00249306	0.0494521	3	4	Up-regulated
Sus_scrofa___ENSSSCG00000023158	2.25571	5.01366	10.4872	0.00252186	0.0498749	3	4	Up-regulated
Sus_scrofa___ABCA8	-5.27259	7.08112	79.7984	1.08006e-10	8.72854e-07	3	4	Down-regulated
Sus_scrofa___ST6GALNAC3	-5.20007	6.65487	70.8344	3.86737e-10	2.08361e-06	3	4	Down-regulated
Sus_scrofa___SH3RF2	-4.05243	7.42325	58.9819	5.21784e-09	1.28905e-05	3	4	Down-regulated
Sus_scrofa___ADAMTS16	-5.81895	5.45634	48.8803	6.30691e-09	1.28905e-05	3	4	Down-regulated
Sus_scrofa___ARHGAP44	-4.43142	6.40595	52.4666	1.19709e-08	1.61238e-05	3	4	Down-regulated
Sus_scrofa___SAMD5	-4.75911	5.51556	44.3499	5.86945e-08	6.77628e-05	3	4	Down-regulated
Sus_scrofa___MYBPC3	-8.50993	8.0729	45.3262	7.31153e-08	7.38602e-05	3	4	Down-regulated
Sus_scrofa___PCDH7	-6.30099	8.63118	43.9313	8.51057e-08	7.85085e-05	3	4	Down-regulated
Sus_scrofa___ASPDH	-7.93648	7.66445	44.2877	9.2707e-08	7.85085e-05	3	4	Down-regulated
Sus_scrofa___CNTN4	-6.12044	5.91832	43.8608	1.02003e-07	7.85085e-05	3	4	Down-regulated
Sus_scrofa___RYR2	-4.69172	10.6116	43.5926	1.24941e-07	8.7801e-05	3	4	Down-regulated
Sus_scrofa___PDE4D	-4.27103	10.1963	43.3432	1.3224e-07	8.90581e-05	3	4	Down-regulated
Sus_scrofa___RCAN2	-2.75535	10.0157	43.0602	1.40879e-07	9.10808e-05	3	4	Down-regulated
Sus_scrofa___ENSSSCG00000015747	-10.2028	7.13161	41.7905	1.4754e-07	9.17186e-05	3	4	Down-regulated
Sus_scrofa___LDLRAD3	-2.35751	7.71555	42.6419	1.56913e-07	9.39328e-05	3	4	Down-regulated
Sus_scrofa___THRB	-3.71392	7.45307	41.4388	2.0047e-07	0.000108783	3	4	Down-regulated
Sus_scrofa___EPB41L3	-5.25528	6.51718	40.2531	2.01912e-07	0.000108783	3	4	Down-regulated
Sus_scrofa___PAPLN	-3.2119	6.65942	38.7137	3.89434e-07	0.000157821	3	4	Down-regulated
Sus_scrofa___CDH2	-7.66509	8.02835	37.9934	4.10716e-07	0.000157821	3	4	Down-regulated
Sus_scrofa___MPP7	-8.61254	6.40754	39.1902	4.61724e-07	0.00016961	3	4	Down-regulated
Sus_scrofa___KLHL13	-3.60709	6.36848	37.5663	4.86176e-07	0.000174623	3	4	Down-regulated
Sus_scrofa___PTPRT	-4.67063	7.05301	37.0012	5.45653e-07	0.000191726	3	4	Down-regulated
Sus_scrofa___LDB2	-1.72818	10.4173	36.8883	6.15447e-07	0.000207239	3	4	Down-regulated
Sus_scrofa___ENSSSCG00000009125	-3.80432	7.39454	36.2119	7.01509e-07	0.00022677	3	4	Down-regulated
Sus_scrofa___PTPRQ	-3.87459	5.6049	31.6398	7.29327e-07	0.000231139	3	4	Down-regulated
Sus_scrofa___SYT9	-3.88438	5.90105	34.843	7.78179e-07	0.000241879	3	4	Down-regulated
Sus_scrofa___PDE4DIP	-6.15462	7.44274	34.7871	8.08327e-07	0.000241905	3	4	Down-regulated
Sus_scrofa___FHOD3	-5.55521	8.36675	35.3211	8.13803e-07	0.000241905	3	4	Down-regulated
Sus_scrofa___ENSSSCG00000043817	-2.17799	7.51011	35.7773	8.23163e-07	0.000241905	3	4	Down-regulated
Sus_scrofa___MTUS2	-5.18576	6.34325	34.1163	9.78618e-07	0.000274222	3	4	Down-regulated
Sus_scrofa___FHL2	-5.12626	7.95405	34.7597	9.84029e-07	0.000274222	3	4	Down-regulated
Sus_scrofa___ZNF385D	-2.9578	7.56404	34.9566	1.0177e-06	0.000278799	3	4	Down-regulated
Sus_scrofa___TTN	-4.92784	11.6871	34.5047	1.12766e-06	0.000298792	3	4	Down-regulated
Sus_scrofa___RALGPS2	-2.62544	7.65534	34.2544	1.21494e-06	0.000316728	3	4	Down-regulated
Sus_scrofa___FGF13	-9.04521	6.38371	34.5221	1.39168e-06	0.000351464	3	4	Down-regulated
Sus_scrofa___SCN7A	-4.04249	5.38352	30.6757	1.46242e-06	0.000358653	3	4	Down-regulated
Sus_scrofa___SPARCL1	-1.80074	9.31395	33.471	1.47675e-06	0.000358653	3	4	Down-regulated
Sus_scrofa___ENSSSCG00000012101	-3.85609	4.9423	29.7434	1.52881e-06	0.000363385	3	4	Down-regulated
Sus_scrofa___ADAM28	-6.64204	4.32017	29.5811	1.65735e-06	0.000388227	3	4	Down-regulated
Sus_scrofa___GPC3	-2.50015	8.2281	32.7992	1.77205e-06	0.000409167	3	4	Down-regulated
Sus_scrofa___DLG2	-3.83022	9.20252	32.5361	1.89614e-06	0.000431653	3	4	Down-regulated
Sus_scrofa___ENSSSCG00000040109	-8.7412	6.63661	33.0655	2.00048e-06	0.000449081	3	4	Down-regulated
Sus_scrofa___ST6GALNAC5	-3.90509	5.21457	29.1851	2.06934e-06	0.000458174	3	4	Down-regulated
Sus_scrofa___CTNNA3	-2.81671	10.0397	31.7966	2.30543e-06	0.00050355	3	4	Down-regulated
Sus_scrofa___ENSSSCG00000017643	-2.32617	7.32765	31.2012	2.74179e-06	0.0005831	3	4	Down-regulated
Sus_scrofa___CORIN	-8.85933	6.2969	30.7745	2.97231e-06	0.000588251	3	4	Down-regulated
Sus_scrofa___ATP2A2	-3.1529	8.16341	30.8678	2.97566e-06	0.000588251	3	4	Down-regulated
Sus_scrofa___ZDHHC14	-3.96381	5.64043	29.5722	2.98438e-06	0.000588251	3	4	Down-regulated
Sus_scrofa___NHSL2	-2.3083	9.00565	30.671	3.13425e-06	0.000603081	3	4	Down-regulated
Sus_scrofa___ENSSSCG00000036052	-9.02406	6.30957	31.0692	3.21466e-06	0.000604672	3	4	Down-regulated
Sus_scrofa___ENSSSCG00000011121	-1.97258	8.5426	30.5067	3.27998e-06	0.000609359	3	4	Down-regulated
Sus_scrofa___PLCB4	-2.05156	10.5291	30.1405	3.62197e-06	0.000658703	3	4	Down-regulated
Sus_scrofa___ADA	-3.3672	5.41054	29.203	3.62708e-06	0.000658703	3	4	Down-regulated
Sus_scrofa___NCEH1	-7.81685	5.53707	29.3127	4.82174e-06	0.000855639	3	4	Down-regulated
Sus_scrofa___CORO2B	-2.35245	6.67774	29.0202	5.03075e-06	0.000864383	3	4	Down-regulated
Sus_scrofa___RORA	-1.49195	11.4795	28.9295	5.08052e-06	0.000864383	3	4	Down-regulated
Sus_scrofa___TMEM164	-5.39051	6.93588	28.1262	5.25343e-06	0.000879663	3	4	Down-regulated
Sus_scrofa___DOCK6	-1.72365	7.07164	28.8464	5.27917e-06	0.000879663	3	4	Down-regulated
Sus_scrofa___MYO10	-2.81333	7.60131	28.3715	5.90133e-06	0.000963466	3	4	Down-regulated
Sus_scrofa___CADM1	-5.35372	5.20886	26.5939	6.30104e-06	0.00100835	3	4	Down-regulated
Sus_scrofa___SGSM1	-4.5169	4.80466	26.3055	7.80015e-06	0.00122402	3	4	Down-regulated
Sus_scrofa___ABLIM1	-3.49858	9.75561	27.1682	8.4247e-06	0.00130931	3	4	Down-regulated
Sus_scrofa___SLC37A1	-4.04366	5.22799	26.1133	9.09635e-06	0.00137594	3	4	Down-regulated
Sus_scrofa___TNNT2	-4.37324	7.3246	26.8075	9.10881e-06	0.00137594	3	4	Down-regulated
Sus_scrofa___COQ8A	-5.1498	4.97197	24.9636	9.86763e-06	0.00147676	3	4	Down-regulated
Sus_scrofa___ESRRG	-5.46986	6.14968	25.5062	1.09637e-05	0.00162574	3	4	Down-regulated
Sus_scrofa___MYOCD	-4.47495	6.92836	25.4985	1.21684e-05	0.00177187	3	4	Down-regulated
Sus_scrofa___SLIT2	-2.65848	7.71387	25.861	1.24381e-05	0.00177192	3	4	Down-regulated
Sus_scrofa___A2M	-3.4815	6.88174	25.7602	1.26857e-05	0.00177192	3	4	Down-regulated
Sus_scrofa___PDZRN4	-2.73861	9.1457	25.7735	1.27085e-05	0.00177192	3	4	Down-regulated
Sus_scrofa___ENSSSCG00000024162	-2.66534	7.27825	25.5879	1.36193e-05	0.00183155	3	4	Down-regulated
Sus_scrofa___KCP	-3.90793	5.67837	24.6646	1.37114e-05	0.00183155	3	4	Down-regulated
Sus_scrofa___RIPOR2	-6.48264	4.37981	24.5809	1.40661e-05	0.00186352	3	4	Down-regulated
Sus_scrofa___ADGRV1	-1.84238	9.21954	25.3936	1.42235e-05	0.00186907	3	4	Down-regulated
Sus_scrofa___TSPAN18	-3.35185	5.48742	24.4893	1.5432e-05	0.00196252	3	4	Down-regulated
Sus_scrofa___PPM1E	-5.42074	7.36428	24.5731	1.54463e-05	0.00196252	3	4	Down-regulated
Sus_scrofa___SULF2	-3.93085	6.4978	24.6965	1.57661e-05	0.00196252	3	4	Down-regulated
Sus_scrofa___ATP8A1	-4.3205	5.61026	24.2992	1.57847e-05	0.00196252	3	4	Down-regulated
Sus_scrofa___LRFN5	-2.99426	6.60893	24.7556	1.70196e-05	0.002084	3	4	Down-regulated
Sus_scrofa___SGCD	-8.20552	6.36506	25.2541	1.7341e-05	0.00210164	3	4	Down-regulated
Sus_scrofa___ENSSSCG00000016437	-3.80587	6.12921	24.3261	1.76015e-05	0.00210164	3	4	Down-regulated
Sus_scrofa___PER2	-3.85245	5.72834	24.2026	1.76916e-05	0.00210164	3	4	Down-regulated
Sus_scrofa___LMO7	-6.13798	6.3892	24.4478	1.77455e-05	0.00210164	3	4	Down-regulated
Sus_scrofa___PPP1R12B	-3.17018	7.6545	24.6536	1.78138e-05	0.00210164	3	4	Down-regulated
Sus_scrofa___SLC16A7	-4.68518	6.26455	24.0698	1.81008e-05	0.00212002	3	4	Down-regulated
Sus_scrofa___ANKRD39	-8.10742	5.41406	23.8859	1.83784e-05	0.00213705	3	4	Down-regulated
Sus_scrofa___TMEFF2	-7.45133	6.62675	24.871	1.92765e-05	0.00220969	3	4	Down-regulated
Sus_scrofa___ADAMTSL3	-2.55378	7.56883	24.3724	1.95075e-05	0.00222042	3	4	Down-regulated
Sus_scrofa___TECRL	-8.38542	6.50426	24.7367	1.96534e-05	0.00222139	3	4	Down-regulated
Sus_scrofa___COL3A1	-2.58258	7.8503	24.2843	1.99577e-05	0.00222467	3	4	Down-regulated
Sus_scrofa___DEPTOR	-1.98802	6.87001	24.2542	2.03244e-05	0.00225003	3	4	Down-regulated
Sus_scrofa___RAP1GAP2	-6.85789	4.70604	23.3399	2.06626e-05	0.0022719	3	4	Down-regulated
Sus_scrofa___NEXN	-5.7418	7.83974	23.5787	2.11198e-05	0.00230648	3	4	Down-regulated
Sus_scrofa___SLC9A3R2	-3.20434	5.94945	23.7907	2.1447e-05	0.0023265	3	4	Down-regulated
Sus_scrofa___WNK2	-7.62124	5.33849	23.216	2.17611e-05	0.00233996	3	4	Down-regulated
Sus_scrofa___KIF26B	-4.39075	7.41854	23.8487	2.18607e-05	0.00233996	3	4	Down-regulated
Sus_scrofa___PDE3B	-4.97542	6.48602	23.3712	2.25363e-05	0.00239641	3	4	Down-regulated
Sus_scrofa___ANTXR1	-1.71225	9.18477	23.6661	2.40793e-05	0.00249483	3	4	Down-regulated
Sus_scrofa___RRAD	-7.75572	5.45346	23.8509	2.44214e-05	0.00251416	3	4	Down-regulated
Sus_scrofa___SORBS1	-2.51033	9.40354	23.5714	2.48017e-05	0.00252868	3	4	Down-regulated
Sus_scrofa___PTGER3	-6.16212	6.36298	23.3862	2.48754e-05	0.00252868	3	4	Down-regulated
Sus_scrofa___TPM2	-4.89046	6.64532	23.0458	2.57877e-05	0.00256963	3	4	Down-regulated
Sus_scrofa___SOX6	-3.71527	7.40041	23.3822	2.5908e-05	0.00256963	3	4	Down-regulated
Sus_scrofa___AUTS2	-1.33105	10.8093	23.428	2.59141e-05	0.00256963	3	4	Down-regulated
Sus_scrofa___SLC4A11	-2.66348	6.09734	23.3229	2.64315e-05	0.00260495	3	4	Down-regulated
Sus_scrofa___KCNJ3	-8.41408	6.06992	23.4358	2.83862e-05	0.00276389	3	4	Down-regulated
Sus_scrofa___TMEM94	-2.93206	6.41064	22.6866	3.23288e-05	0.00302745	3	4	Down-regulated
Sus_scrofa___COLEC12	-2.3182	7.24622	22.706	3.27675e-05	0.00302745	3	4	Down-regulated
Sus_scrofa___SRL	-7.24047	5.00637	22.2025	3.28965e-05	0.00302745	3	4	Down-regulated
Sus_scrofa___MLIP	-4.69061	8.2637	22.5309	3.30065e-05	0.00302745	3	4	Down-regulated
Sus_scrofa___RNF150	-4.03992	6.39319	22.2763	3.31297e-05	0.00302745	3	4	Down-regulated
Sus_scrofa___OBSCN	-8.47289	6.09738	23.0508	3.31534e-05	0.00302745	3	4	Down-regulated
Sus_scrofa___GALNT16	-2.67207	7.96737	22.4752	3.51013e-05	0.00316951	3	4	Down-regulated
Sus_scrofa___KIAA1109	-1.4679	8.0273	22.2637	3.74513e-05	0.00334434	3	4	Down-regulated
Sus_scrofa___ENSSSCG00000008137	-1.692	9.3332	22.1611	3.86235e-05	0.00339278	3	4	Down-regulated
Sus_scrofa___DMD	-2.49581	10.5733	22.0767	3.96677e-05	0.00342352	3	4	Down-regulated
Sus_scrofa___CAMK2A	-5.71996	5.67969	21.5976	4.10971e-05	0.00347858	3	4	Down-regulated
Sus_scrofa___ANKRD44	-1.51206	8.61607	21.9346	4.1539e-05	0.00347858	3	4	Down-regulated
Sus_scrofa___NEBL	-4.13171	9.2638	21.9289	4.16804e-05	0.00347858	3	4	Down-regulated
Sus_scrofa___PCP4	-7.97278	5.36819	21.6607	4.17525e-05	0.00347858	3	4	Down-regulated
Sus_scrofa___CREB5	-2.41295	8.89491	21.7829	4.36713e-05	0.00360132	3	4	Down-regulated
Sus_scrofa___INPP5B	-1.90232	6.95636	21.7001	4.51736e-05	0.0037063	3	4	Down-regulated
Sus_scrofa___MYH7B	-5.87208	5.66595	20.7452	5.08359e-05	0.00404378	3	4	Down-regulated
Sus_scrofa___CPT1B	-7.24368	4.69671	20.9631	5.08648e-05	0.00404378	3	4	Down-regulated
Sus_scrofa___MYOZ2	-4.9116	7.68135	20.924	5.12276e-05	0.00404378	3	4	Down-regulated
Sus_scrofa___MYL3	-4.97929	5.6094	20.4977	5.149e-05	0.00404378	3	4	Down-regulated
Sus_scrofa___ART3	-6.9659	4.59154	19.8053	5.19329e-05	0.00405034	3	4	Down-regulated
Sus_scrofa___RGS12	-1.95609	6.64106	21.2496	5.21235e-05	0.00405034	3	4	Down-regulated
Sus_scrofa___ARHGEF28	-5.58526	6.15346	21.0259	5.31238e-05	0.00409239	3	4	Down-regulated
Sus_scrofa___LAMA4	-1.36796	9.33182	21.0304	5.55761e-05	0.00422792	3	4	Down-regulated
Sus_scrofa___NR3C2	-2.90299	7.29424	21.026	5.56956e-05	0.00422792	3	4	Down-regulated
Sus_scrofa___NTF3	-1.83056	7.63733	20.9776	5.67847e-05	0.00422792	3	4	Down-regulated
Sus_scrofa___MYH7	-4.12652	7.83004	20.9476	5.71379e-05	0.00422792	3	4	Down-regulated
Sus_scrofa___UNC45B	-6.52759	4.55262	20.0908	5.7319e-05	0.00422792	3	4	Down-regulated
Sus_scrofa___SEMA5A	-2.10252	10.2851	20.9245	5.75165e-05	0.00422792	3	4	Down-regulated
Sus_scrofa___PKP2	-7.46511	5.46144	21.0944	5.75188e-05	0.00422792	3	4	Down-regulated
Sus_scrofa___ARHGEF3	-3.5391	5.32904	20.4405	5.75476e-05	0.00422792	3	4	Down-regulated
Sus_scrofa___MIGA2	-7.82529	5.71768	21.1835	5.94825e-05	0.00433478	3	4	Down-regulated
Sus_scrofa___TXLNB	-4.81249	5.48515	19.8133	5.95386e-05	0.00433478	3	4	Down-regulated
Sus_scrofa___PCSK6	-3.42167	5.93919	20.5024	6.12088e-05	0.00443305	3	4	Down-regulated
Sus_scrofa___NOTCH3	-1.69595	8.73266	20.7125	6.16928e-05	0.00443305	3	4	Down-regulated
Sus_scrofa___SLC8A1	-1.68702	11.1143	20.6136	6.36705e-05	0.00455357	3	4	Down-regulated
Sus_scrofa___MYLK3	-7.18459	4.97981	19.9973	6.56339e-05	0.00464608	3	4	Down-regulated
Sus_scrofa___EPHB1	-3.1058	5.8138	20.2641	6.59682e-05	0.00464608	3	4	Down-regulated
Sus_scrofa___ENSSSCG00000048674	-6.56761	4.27548	19.5632	6.72552e-05	0.00470583	3	4	Down-regulated
Sus_scrofa___ERBB4	-7.10316	5.03844	20.0704	6.84379e-05	0.00476794	3	4	Down-regulated
Sus_scrofa___ENSSSCG00000031608	-7.4333	5.13686	19.8675	7.12783e-05	0.00493522	3	4	Down-regulated
Sus_scrofa___HMCN1	-2.43211	7.5709	20.2559	7.21957e-05	0.00496553	3	4	Down-regulated
Sus_scrofa___RAB30	-2.58597	6.71158	20.0698	7.63611e-05	0.00519302	3	4	Down-regulated
Sus_scrofa___SCARB1	-2.4227	6.87315	19.9048	8.11884e-05	0.00537807	3	4	Down-regulated
Sus_scrofa___ENSSSCG00000027725	-1.86948	10.4765	19.8285	8.25556e-05	0.00544631	3	4	Down-regulated
Sus_scrofa___TRPM3	-4.91958	5.32035	19.549	8.31706e-05	0.00546458	3	4	Down-regulated
Sus_scrofa___RETREG1	-6.30433	6.6082	19.6018	8.51564e-05	0.00554993	3	4	Down-regulated
Sus_scrofa___SAMD12	-5.45866	5.94501	19.5075	8.81252e-05	0.00569747	3	4	Down-regulated
Sus_scrofa___HUNK	-3.7615	5.49389	19.1673	9.03238e-05	0.00580317	3	4	Down-regulated
Sus_scrofa___FAR2	-5.63462	4.42504	19.2644	9.04781e-05	0.00580317	3	4	Down-regulated
Sus_scrofa___PTPRF	-1.9311	6.39542	19.4505	9.42583e-05	0.00599523	3	4	Down-regulated
Sus_scrofa___MYOM1	-4.23702	6.71827	19.1589	9.45855e-05	0.00599523	3	4	Down-regulated
Sus_scrofa___FADS2	-2.58331	6.0191	19.295	9.6236e-05	0.00607603	3	4	Down-regulated
Sus_scrofa___PROM1	-2.80313	6.68389	19.284	9.86723e-05	0.00618155	3	4	Down-regulated
Sus_scrofa___DOCK3	-5.23601	5.40061	18.8298	0.000104579	0.00652061	3	4	Down-regulated
Sus_scrofa___ENSSSCG00000010212	-3.53947	8.13956	19.0191	0.000107773	0.0066741	3	4	Down-regulated
Sus_scrofa___FAM117A	-1.89846	6.90683	19.0054	0.000109502	0.00675526	3	4	Down-regulated
Sus_scrofa___ENSSSCG00000015632	-6.43623	4.38139	17.9496	0.00011031	0.00677922	3	4	Down-regulated
Sus_scrofa___PDE9A	-2.97384	6.61855	18.8852	0.00011076	0.0067811	3	4	Down-regulated
Sus_scrofa___TRIM55	-7.57813	5.49325	19.001	0.000111953	0.0068283	3	4	Down-regulated
Sus_scrofa___OSR1	-2.63974	5.32632	18.2375	0.000114515	0.00695832	3	4	Down-regulated
Sus_scrofa___PLEKHG3	-1.62711	7.42925	18.8287	0.00011608	0.00700077	3	4	Down-regulated
Sus_scrofa___CKM	-4.29982	4.94144	17.5486	0.000117508	0.00705458	3	4	Down-regulated
Sus_scrofa___TACC2	-2.89009	7.02291	18.7584	0.000117845	0.00705458	3	4	Down-regulated
Sus_scrofa___ATP2B4	-2.44477	6.87495	18.6822	0.00012095	0.0071422	3	4	Down-regulated
Sus_scrofa___SCN5A	-7.17362	4.93422	18.3584	0.000122179	0.007181	3	4	Down-regulated
Sus_scrofa___PYGB	-6.15443	6.01476	18.5011	0.000123075	0.00720749	3	4	Down-regulated
Sus_scrofa___MYL7	-5.31666	4.86289	17.5218	0.000124531	0.00724028	3	4	Down-regulated
Sus_scrofa___ENSSSCG00000003261	-6.01097	4.0516	17.6526	0.000125002	0.00724158	3	4	Down-regulated
Sus_scrofa___EFCAB5	-2.1562	6.7412	18.5979	0.000125539	0.00724675	3	4	Down-regulated
Sus_scrofa___ASB4	-7.37885	5.12758	18.4151	0.000126078	0.00725198	3	4	Down-regulated
Sus_scrofa___ABCA6	-3.26752	4.88608	17.4199	0.00013193	0.00749083	3	4	Down-regulated
Sus_scrofa___TLN2	-2.40143	6.97048	18.4422	0.000132438	0.00749083	3	4	Down-regulated
Sus_scrofa___RXFP1	-6.7758	4.58579	18.0755	0.000132548	0.00749083	3	4	Down-regulated
Sus_scrofa___CDH13	-2.54837	9.14858	18.4144	0.000133327	0.00749642	3	4	Down-regulated
Sus_scrofa___KCNQ1	-7.06909	5.07367	18.3844	0.000134936	0.00754659	3	4	Down-regulated
Sus_scrofa___KSR1	-1.34903	9.41558	18.3549	0.000135971	0.00755973	3	4	Down-regulated
Sus_scrofa___ENSSSCG00000038455	-8.39201	6.08133	18.6172	0.000136106	0.00755973	3	4	Down-regulated
Sus_scrofa___PRKAA2	-5.27159	5.44467	17.8389	0.00013686	0.00757558	3	4	Down-regulated
Sus_scrofa___GRIA1	-6.46942	4.54364	17.6869	0.000140252	0.00768438	3	4	Down-regulated
Sus_scrofa___TNS3	-2.35958	6.52272	18.2002	0.000144164	0.0078192	3	4	Down-regulated
Sus_scrofa___ENSSSCG00000033497	-1.28333	8.95754	18.1382	0.000146531	0.00788031	3	4	Down-regulated
Sus_scrofa___ITGB6	-7.4069	4.99663	17.3669	0.000146753	0.00788031	3	4	Down-regulated
Sus_scrofa___TNXB	-3.34604	4.87985	17.4194	0.000149444	0.00794559	3	4	Down-regulated
Sus_scrofa___ENSSSCG00000004598	-7.22669	5.00851	17.7225	0.000151126	0.0080087	3	4	Down-regulated
Sus_scrofa___VWF	-3.21778	5.04654	17.6014	0.00015216	0.00803403	3	4	Down-regulated
Sus_scrofa___TET1	-1.52125	7.27703	17.9564	0.000156717	0.0082093	3	4	Down-regulated
Sus_scrofa___GABRB1	-6.67458	4.71	17.3234	0.000156943	0.0082093	3	4	Down-regulated
Sus_scrofa___ENSSSCG00000033414	-7.04378	4.53011	16.5926	0.000166319	0.00860308	3	4	Down-regulated
Sus_scrofa___FOXN3	-1.21372	9.30629	17.7675	0.0001666	0.00860308	3	4	Down-regulated
Sus_scrofa___RBFOX1	-4.28833	6.01725	17.388	0.000169265	0.00867784	3	4	Down-regulated
Sus_scrofa___GUCY1B1	-1.20505	9.93146	17.7057	0.000170196	0.00867784	3	4	Down-regulated
Sus_scrofa___TENM2	-8.50782	6.64052	17.9694	0.000171031	0.00869301	3	4	Down-regulated
Sus_scrofa___DDX4	-1.92345	5.92232	17.6593	0.000172356	0.00873287	3	4	Down-regulated
Sus_scrofa___PIP5K1B	-3.59136	6.28914	17.463	0.000174023	0.00878063	3	4	Down-regulated
Sus_scrofa___ENSSSCG00000010626	-5.61049	8.10008	17.3409	0.000174385	0.00878063	3	4	Down-regulated
Sus_scrofa___NAV2	-2.33134	8.05084	17.5369	0.00018088	0.00898126	3	4	Down-regulated
Sus_scrofa___CDH24	-1.93393	6.54742	17.546	0.000180888	0.00898126	3	4	Down-regulated
Sus_scrofa___VSTM1	-6.48054	4.21042	17.7015	0.000181483	0.00898126	3	4	Down-regulated
Sus_scrofa___HSPG2	-1.52446	7.96869	17.5241	0.000181703	0.00898126	3	4	Down-regulated
Sus_scrofa___PHLDB2	-1.92457	8.2942	17.5105	0.000182463	0.00899129	3	4	Down-regulated
Sus_scrofa___ZNF804B	-8.09802	5.70589	17.2333	0.000183956	0.00903734	3	4	Down-regulated
Sus_scrofa___LARGE1	-1.8789	8.60873	17.4457	0.000186531	0.00912001	3	4	Down-regulated
Sus_scrofa___LAMA3	-3.21907	4.5463	16.0471	0.000196615	0.00945799	3	4	Down-regulated
Sus_scrofa___OSBPL3	-5.23512	5.28322	17.0061	0.000197229	0.00945939	3	4	Down-regulated
Sus_scrofa___TNFRSF21	-1.80001	9.69418	17.2394	0.000200404	0.00952686	3	4	Down-regulated
Sus_scrofa___GPR137C	-6.64532	4.83075	17.1491	0.000202141	0.00958123	3	4	Down-regulated
Sus_scrofa___ASB2	-6.82704	4.90875	17.0948	0.000206576	0.00976285	3	4	Down-regulated
Sus_scrofa___CEP85	-6.73015	4.59068	16.339	0.000208651	0.00983216	3	4	Down-regulated
Sus_scrofa___PTCHD4	-6.43784	4.78235	16.7033	0.000215243	0.0100549	3	4	Down-regulated
Sus_scrofa___LRRC2	-5.98032	6.15436	16.8908	0.000218769	0.0101649	3	4	Down-regulated
Sus_scrofa___NGF	-1.55786	8.49033	16.9874	0.000219243	0.0101649	3	4	Down-regulated
Sus_scrofa___NSMF	-2.80987	5.36611	16.6291	0.000220115	0.0101649	3	4	Down-regulated
Sus_scrofa___ENSSSCG00000041213	-3.54829	4.8605	16.4941	0.000221901	0.0102182	3	4	Down-regulated
Sus_scrofa___RADIL	-1.98162	6.81733	16.9577	0.000222803	0.0102306	3	4	Down-regulated
Sus_scrofa___SCN9A	-2.20195	6.87279	16.8653	0.000230662	0.0105615	3	4	Down-regulated
Sus_scrofa___STXBP6	-5.02302	5.30642	16.65	0.000231781	0.0105827	3	4	Down-regulated
Sus_scrofa___ST3GAL4	-2.09416	6.57086	16.8065	0.000234829	0.0106616	3	4	Down-regulated
Sus_scrofa___HMCN2	-6.5373	4.50494	16.0448	0.000240481	0.010829	3	4	Down-regulated
Sus_scrofa___IKBKG	-3.43665	5.19699	16.3537	0.000244783	0.0108572	3	4	Down-regulated
Sus_scrofa___WRAP73	-1.74303	6.13602	16.6809	0.000245641	0.0108572	3	4	Down-regulated
Sus_scrofa___DPP4	-7.85698	5.44137	16.5822	0.000246171	0.0108572	3	4	Down-regulated
Sus_scrofa___SEMA6D	-1.70907	7.83954	16.6615	0.000246506	0.0108572	3	4	Down-regulated
Sus_scrofa___SPTB	-6.67701	4.67919	16.3831	0.000246526	0.0108572	3	4	Down-regulated
Sus_scrofa___CLSTN2	-2.58913	5.20057	16.1844	0.000261385	0.0114098	3	4	Down-regulated
Sus_scrofa___ASB15	-7.0183	4.91266	16.2101	0.000261896	0.0114098	3	4	Down-regulated
Sus_scrofa___ADORA2A	-1.79393	5.69894	16.2069	0.000265037	0.0114873	3	4	Down-regulated
Sus_scrofa___TRDN	-8.38282	6.34721	16.702	0.000265115	0.0114873	3	4	Down-regulated
Sus_scrofa___COL14A1	-2.65173	5.66328	16.3061	0.000267166	0.0114947	3	4	Down-regulated
Sus_scrofa___ADAM22	-2.11564	7.41098	16.4172	0.000268577	0.0114947	3	4	Down-regulated
Sus_scrofa___FAM160A1	-7.04805	5.09966	16.3324	0.000268823	0.0114947	3	4	Down-regulated
Sus_scrofa___PDZRN3	-1.94164	8.00431	16.3209	0.000278328	0.0118191	3	4	Down-regulated
Sus_scrofa___ACTN2	-4.90906	8.19327	16.1699	0.000278604	0.0118191	3	4	Down-regulated
Sus_scrofa___EFNA5	-3.92725	7.01649	16.1706	0.000280532	0.0118388	3	4	Down-regulated
Sus_scrofa___USP13	-7.65241	5.61376	16.3763	0.000283971	0.0119036	3	4	Down-regulated
Sus_scrofa___SLCO5A1	-6.80193	4.79531	15.868	0.000284278	0.0119036	3	4	Down-regulated
Sus_scrofa___SEMA3C	-4.95304	5.55494	16.0093	0.000287242	0.0119657	3	4	Down-regulated
Sus_scrofa___PARVA	-1.25491	9.3458	16.2068	0.000289443	0.0120246	3	4	Down-regulated
Sus_scrofa___CCDC167	-3.41348	5.03077	15.5087	0.000290143	0.0120246	3	4	Down-regulated
Sus_scrofa___SVIL	-2.09926	8.00512	16.1897	0.000291698	0.0120389	3	4	Down-regulated
Sus_scrofa___SLC12A9	-5.64667	4.63792	16.1813	0.00029198	0.0120389	3	4	Down-regulated
Sus_scrofa___EBI3	-2.02796	5.52778	16.0708	0.000295544	0.012124	3	4	Down-regulated
Sus_scrofa___JAM3	-1.22516	8.41547	16.1364	0.000297048	0.012124	3	4	Down-regulated
Sus_scrofa___NM_001206399	-4.99127	5.18124	15.7948	0.00030932	0.0124058	3	4	Down-regulated
Sus_scrofa___CCDC69	-6.48107	4.47899	15.4734	0.000316236	0.0125277	3	4	Down-regulated
Sus_scrofa___STRADB	-4.25479	5.43728	15.6253	0.000323051	0.0127353	3	4	Down-regulated
Sus_scrofa___SERTAD4	-3.96349	4.47368	15.2154	0.000324669	0.012768	3	4	Down-regulated
Sus_scrofa___GRIK4	-1.9388	8.54332	15.7963	0.000336529	0.0131702	3	4	Down-regulated
Sus_scrofa___PPARGC1A	-5.09733	6.3081	15.5451	0.000339578	0.0132256	3	4	Down-regulated
Sus_scrofa___PLA2G7	-7.04949	4.88766	15.2408	0.000364354	0.014055	3	4	Down-regulated
Sus_scrofa___BCAS3	-1.10552	10.4625	15.5538	0.000366738	0.0140632	3	4	Down-regulated
Sus_scrofa___MYO18B	-5.71201	6.165	15.4667	0.00036678	0.0140632	3	4	Down-regulated
Sus_scrofa___AKNA	-1.84582	5.90738	15.539	0.0003674	0.0140632	3	4	Down-regulated
Sus_scrofa___DISC1	-1.442	7.64183	15.5415	0.000369304	0.0140632	3	4	Down-regulated
Sus_scrofa___PTPRS	-2.17029	6.2521	15.4144	0.000381125	0.0142887	3	4	Down-regulated
Sus_scrofa___SNRNP70	-1.21184	9.05907	15.4481	0.000381286	0.0142887	3	4	Down-regulated
Sus_scrofa___ASTN2	-3.26771	5.47529	15.2041	0.000382504	0.0142887	3	4	Down-regulated
Sus_scrofa___ABCA9	-2.56984	5.64864	15.3272	0.000383025	0.0142887	3	4	Down-regulated
Sus_scrofa___DPF3	-4.76237	4.8929	14.9395	0.000384197	0.0142887	3	4	Down-regulated
Sus_scrofa___ELOVL6	-1.80618	8.90117	15.4254	0.000384557	0.0142887	3	4	Down-regulated
Sus_scrofa___STAU2	-3.27757	6.33527	15.2604	0.000387009	0.0143469	3	4	Down-regulated
Sus_scrofa___MACROD1	-6.31917	4.227	14.4665	0.000391056	0.0144637	3	4	Down-regulated
Sus_scrofa___ACADL	-6.04991	4.28177	14.6383	0.000396851	0.0145846	3	4	Down-regulated
Sus_scrofa___ATP1A1	-3.03919	6.3159	15.2933	0.000397566	0.0145846	3	4	Down-regulated
Sus_scrofa___CDH8	-6.11366	4.1053	14.3423	0.000415467	0.0151243	3	4	Down-regulated
Sus_scrofa___CHRM2	-5.03064	5.59274	15.0766	0.000420162	0.0151802	3	4	Down-regulated
Sus_scrofa___ST8SIA1	-1.61248	7.54955	15.1802	0.000421857	0.0151802	3	4	Down-regulated
Sus_scrofa___PMFBP1	-2.96899	5.30666	14.7742	0.000424517	0.0151802	3	4	Down-regulated
Sus_scrofa___PARM1	-6.91447	5.06533	15.0789	0.000442616	0.0157184	3	4	Down-regulated
Sus_scrofa___ULK4	-1.3126	7.28123	15.045	0.000443978	0.0157184	3	4	Down-regulated
Sus_scrofa___PPP1R9A	-4.23056	5.28943	14.5408	0.000455556	0.0159721	3	4	Down-regulated
Sus_scrofa___UNKL	-1.33855	7.35189	14.8448	0.000477688	0.0166043	3	4	Down-regulated
Sus_scrofa___PLXDC2	-0.978781	10.7788	14.8364	0.000477695	0.0166043	3	4	Down-regulated
Sus_scrofa___MYOM3	-4.23007	4.36337	13.8533	0.000486925	0.0168888	3	4	Down-regulated
Sus_scrofa___HTR4	-2.93835	5.0379	14.4844	0.000490992	0.016924	3	4	Down-regulated
Sus_scrofa___SLC19A1	-2.71749	5.58971	14.6453	0.000491082	0.016924	3	4	Down-regulated
Sus_scrofa___SPRING1	-1.69131	7.69128	14.6941	0.000504867	0.0173621	3	4	Down-regulated
Sus_scrofa___RFX2	-2.01252	7.42061	14.6789	0.000507936	0.0174305	3	4	Down-regulated
Sus_scrofa___WNT5B	-4.28816	5.31111	14.5484	0.000510771	0.0174907	3	4	Down-regulated
Sus_scrofa___ENSSSCG00000014822	-1.30698	9.12235	14.6412	0.000513826	0.0175581	3	4	Down-regulated
Sus_scrofa___PTDSS1	-4.5821	4.83347	14.264	0.000517615	0.0176047	3	4	Down-regulated
Sus_scrofa___ENSSSCG00000017783	-4.0767	4.89417	14.3986	0.000518458	0.0176047	3	4	Down-regulated
Sus_scrofa___LHFPL3	-3.5628	6.31608	14.4589	0.000528222	0.0178612	3	4	Down-regulated
Sus_scrofa___SH3BP5	-3.20495	4.97278	14.2219	0.000535703	0.0180221	3	4	Down-regulated
Sus_scrofa___SASH1	-0.993673	10.3297	14.5099	0.000539584	0.0180221	3	4	Down-regulated
Sus_scrofa___SLC41A1	-6.70079	4.59275	14.0969	0.000540804	0.0180221	3	4	Down-regulated
Sus_scrofa___RFTN1	-1.48628	8.04753	14.4355	0.000555492	0.0183381	3	4	Down-regulated
Sus_scrofa___PPARA	-5.53609	6.36894	14.3553	0.00055607	0.0183381	3	4	Down-regulated
Sus_scrofa___RNF144A	-2.40726	5.5162	14.3293	0.000557075	0.0183381	3	4	Down-regulated
Sus_scrofa___HRH2	-3.39465	5.14116	14.1347	0.000561482	0.0184456	3	4	Down-regulated
Sus_scrofa___ASAP1	-1.18474	9.5906	14.3903	0.000564363	0.0185026	3	4	Down-regulated
Sus_scrofa___SLIT3	-2.73002	8.80707	14.3485	0.00057381	0.0186516	3	4	Down-regulated
Sus_scrofa___FRMD4B	-2.26542	6.50789	14.3614	0.000574678	0.0186516	3	4	Down-regulated
Sus_scrofa___DTNA	-4.15837	6.30584	14.0665	0.000593997	0.0191632	3	4	Down-regulated
Sus_scrofa___MRAS	-3.83675	4.85672	13.8175	0.000599341	0.0192587	3	4	Down-regulated
Sus_scrofa___PPP2R2B	-6.59248	4.76394	14.0643	0.000606018	0.0193962	3	4	Down-regulated
Sus_scrofa___SAT1	-1.38738	8.24369	14.133	0.000622284	0.0197879	3	4	Down-regulated
Sus_scrofa___KCNAB1	-1.41511	10.3068	14.1173	0.000625438	0.0198215	3	4	Down-regulated
Sus_scrofa___ACSS3	-3.35086	7.31992	14.0076	0.000646531	0.0203701	3	4	Down-regulated
Sus_scrofa___DST	-1.96088	8.53776	14.012	0.000651486	0.0204863	3	4	Down-regulated
Sus_scrofa___PITPNM2	-1.73894	6.93213	14.0073	0.000654155	0.0205303	3	4	Down-regulated
[truncated: 161 more rows]

## Sheet: Resident Immune
Gene	logFC	logCPM	F	PValue	FDR	Observations_PCMV	Observations_Control	level
[truncated: 433 more rows]

[truncated: 1 more sheets: Vascular EC]
