# Supplementary material for: Integrated Molecular Profiling of Preclinical and Clinical Cardiac Xenotransplants
Source: Research Square preprint supplement (doi:10.21203/rs.3.rs-8406985/v1), 2026-02-04
Supplement: Supplementary file 19 [file 949ff51c56dcef5aac4e8d48.xlsx]

## Sheet: CM
Gene	logFC	logCPM	F	PValue	FDR	Observations_Extended	Observations_Control	level
Sus_scrofa___THBD	5.09265	2.60036	191.014	2.61332e-13	7.23131e-09	3	4	Up-regulated
Sus_scrofa___hCD46	14.1563	6.57908	216.518	7.93819e-13	1.09829e-08	3	4	Up-regulated
Sus_scrofa___ENSSSCG00000014672	7.4785	1.12274	82.7167	1.53074e-10	1.05893e-06	3	4	Up-regulated
Sus_scrofa___ISG20	6.66303	1.00756	72.0742	2.74443e-10	1.31213e-06	3	4	Up-regulated
Sus_scrofa___ENSSSCG00000013366	5.91745	5.0472	101.791	2.84514e-10	1.31213e-06	3	4	Up-regulated
Sus_scrofa___ENSSSCG00000031163	5.40164	0.0178497	65.2188	6.97038e-10	2.75539e-06	3	4	Up-regulated
Sus_scrofa___HMOX1	5.80497	0.212711	73.5905	1.64141e-09	5.67742e-06	3	4	Up-regulated
Sus_scrofa___SHFL	6.03587	-0.335855	58.4009	2.51126e-09	7.72101e-06	3	4	Up-regulated
Sus_scrofa___TRIM22	8.44386	0.436566	61.6333	3.55246e-09	9.83002e-06	3	4	Up-regulated
Sus_scrofa___HES4	8.6028	0.615255	65.2838	5.94533e-09	1.43505e-05	3	4	Up-regulated
Sus_scrofa___PFKFB3	7.39706	4.88338	73.9775	6.48386e-09	1.43505e-05	3	4	Up-regulated
Sus_scrofa___ZBP1	6.35687	-0.00829542	53.3025	6.74197e-09	1.43505e-05	3	4	Up-regulated
Sus_scrofa___MX2	11.7756	5.79503	62.9123	7.81154e-09	1.46535e-05	3	4	Up-regulated
Sus_scrofa___ENSSSCG00000016263	6.99219	2.99372	70.234	7.94343e-09	1.46535e-05	3	4	Up-regulated
Sus_scrofa___KLF5	6.10879	1.2662	66.7529	8.96556e-09	1.52896e-05	3	4	Up-regulated
Sus_scrofa___UPP1	5.80548	2.48756	71.2168	9.39336e-09	1.52896e-05	3	4	Up-regulated
Sus_scrofa___SNAPC1	2.61181	7.37397	69.9035	1.08243e-08	1.664e-05	3	4	Up-regulated
Sus_scrofa___MOB3B	3.73415	4.62924	69.5011	1.14713e-08	1.67065e-05	3	4	Up-regulated
Sus_scrofa___STAT3	2.45128	7.72693	68.239	1.35321e-08	1.87224e-05	3	4	Up-regulated
Sus_scrofa___IFI35	5.45273	-0.319557	55.5641	1.50423e-08	1.98208e-05	3	4	Up-regulated
Sus_scrofa___FOXS1	10.0147	4.63018	57.6934	1.66137e-08	2.08963e-05	3	4	Up-regulated
Sus_scrofa___NDRG1	5.50241	0.164961	59.7946	1.82937e-08	2.2009e-05	3	4	Up-regulated
Sus_scrofa___TRIM38	5.20658	-1.47085	47.6793	2.15853e-08	2.48869e-05	3	4	Up-regulated
Sus_scrofa___SLC16A3	5.19438	2.72384	63.8466	2.58772e-08	2.8642e-05	3	4	Up-regulated
Sus_scrofa___FAM171B	3.62144	3.42958	62.3319	3.11188e-08	3.31188e-05	3	4	Up-regulated
Sus_scrofa___ADM	6.47618	1.58465	59.0144	3.60851e-08	3.69819e-05	3	4	Up-regulated
Sus_scrofa___phTBM	11.3	2.81887	67.7246	3.86512e-08	3.76097e-05	3	4	Up-regulated
Sus_scrofa___HLA-DOB	5.59631	0.366588	47.607	3.94161e-08	3.76097e-05	3	4	Up-regulated
Sus_scrofa___ANKRD37	4.44845	2.61887	60.5714	4.08721e-08	3.76991e-05	3	4	Up-regulated
Sus_scrofa___ENSSSCG00000016868	4.01633	-0.52704	50.3853	4.39826e-08	3.92594e-05	3	4	Up-regulated
Sus_scrofa___RAB32	2.43197	7.1358	59.6381	4.59533e-08	3.97367e-05	3	4	Up-regulated
Sus_scrofa___HK2	6.8359	7.49897	59.3651	4.78858e-08	4.0153e-05	3	4	Up-regulated
Sus_scrofa___SH3D19	4.08398	4.51121	59.1469	4.952e-08	4.0302e-05	3	4	Up-regulated
Sus_scrofa___ENO1	2.16858	7.12975	57.2	6.65095e-08	5.08274e-05	3	4	Up-regulated
Sus_scrofa___ETV7	5.91253	1.22417	51.1847	6.79634e-08	5.08274e-05	3	4	Up-regulated
Sus_scrofa___HERC5	7.39791	5.90773	56.3622	7.63099e-08	5.55677e-05	3	4	Up-regulated
Sus_scrofa___RPS6KA1	4.38745	0.603632	54.2314	8.23871e-08	5.69933e-05	3	4	Up-regulated
Sus_scrofa___HIF1A	2.47748	7.18928	55.5295	8.62452e-08	5.82071e-05	3	4	Up-regulated
Sus_scrofa___MED12L	2.50427	4.35671	55.1817	9.11422e-08	6.00475e-05	3	4	Up-regulated
Sus_scrofa___ENSSSCG00000001398	6.84262	1.18544	48.774	9.84694e-08	6.3241e-05	3	4	Up-regulated
Sus_scrofa___STAC2	7.46114	6.49514	54.5871	1.0086e-07	6.3241e-05	3	4	Up-regulated
Sus_scrofa___WSB1	2.54336	7.26151	54.3782	1.03495e-07	6.3241e-05	3	4	Up-regulated
Sus_scrofa___TUFT1	3.42904	2.01521	54.4025	1.05131e-07	6.3241e-05	3	4	Up-regulated
Sus_scrofa___C1orf115	4.70466	1.69084	53.1792	1.08933e-07	6.34502e-05	3	4	Up-regulated
Sus_scrofa___FBXO39	3.07918	6.76478	53.9934	1.10065e-07	6.34502e-05	3	4	Up-regulated
Sus_scrofa___RASAL1	6.47982	3.30123	51.6916	1.13462e-07	6.40737e-05	3	4	Up-regulated
Sus_scrofa___SAMD9	5.6648	0.0668972	45.9824	1.1669e-07	6.45784e-05	3	4	Up-regulated
Sus_scrofa___ENSSSCG00000006452	4.06242	-0.622979	47.4459	1.25327e-07	6.66908e-05	3	4	Up-regulated
Sus_scrofa___ENSSSCG00000045077	5.1022	-1.22762	42.4125	1.30916e-07	6.83506e-05	3	4	Up-regulated
Sus_scrofa___CNN3	7.28551	1.69582	46.5907	1.51767e-07	7.76881e-05	3	4	Up-regulated
Sus_scrofa___PGK1	1.81802	5.35793	51.9107	1.54416e-07	7.76881e-05	3	4	Up-regulated
Sus_scrofa___PNOC	3.41342	1.99149	51.853	1.58561e-07	7.83491e-05	3	4	Up-regulated
Sus_scrofa___OASL	5.21831	1.75805	51.6338	1.6998e-07	8.2518e-05	3	4	Up-regulated
Sus_scrofa___CMIP	2.72158	4.79607	51.0405	1.78508e-07	8.51637e-05	3	4	Up-regulated
Sus_scrofa___FLT1	4.06733	3.48055	50.7708	1.87147e-07	8.67987e-05	3	4	Up-regulated
Sus_scrofa___ENSSSCG00000009633	3.67619	3.80026	50.5241	1.94743e-07	8.67987e-05	3	4	Up-regulated
Sus_scrofa___ARMC12	3.31128	2.59064	50.5651	1.95632e-07	8.67987e-05	3	4	Up-regulated
Sus_scrofa___STX3	3.85492	1.61736	50.4792	2.00758e-07	8.67987e-05	3	4	Up-regulated
Sus_scrofa___PSMB9	6.04301	2.02027	50.176	2.01279e-07	8.67987e-05	3	4	Up-regulated
Sus_scrofa___OSMR	3.72958	5.08422	49.9171	2.15484e-07	9.03432e-05	3	4	Up-regulated
Sus_scrofa___TYRP1	6.75604	0.0654072	42.018	2.23574e-07	9.23362e-05	3	4	Up-regulated
Sus_scrofa___KDM3A	2.07279	6.75272	49.4451	2.33394e-07	9.36124e-05	3	4	Up-regulated
Sus_scrofa___ETS1	3.68093	4.01995	49.4521	2.33431e-07	9.36124e-05	3	4	Up-regulated
Sus_scrofa___ZNFX1	3.83351	5.6566	49.1488	2.45562e-07	9.70705e-05	3	4	Up-regulated
Sus_scrofa___PEA15	1.78683	3.99969	48.8671	2.57804e-07	9.98606e-05	3	4	Up-regulated
Sus_scrofa___ATP8B4	2.66668	1.13885	48.9972	2.59837e-07	9.98606e-05	3	4	Up-regulated
Sus_scrofa___AK4	5.7947	3.41496	48.7952	2.65716e-07	0.000100605	3	4	Up-regulated
Sus_scrofa___ELF4	3.8812	0.914018	48.7581	2.72969e-07	0.000100711	3	4	Up-regulated
Sus_scrofa___UBD	6.41679	0.244322	38.5703	2.80237e-07	0.000102032	3	4	Up-regulated
Sus_scrofa___ENSSSCG00000041254	3.3454	-0.767818	44.3847	2.8854e-07	0.000103691	3	4	Up-regulated
Sus_scrofa___UBE2L6	7.08365	2.86201	45.805	3.17143e-07	0.000111114	3	4	Up-regulated
Sus_scrofa___PLOD1	2.19206	4.59473	47.668	3.17228e-07	0.000111114	3	4	Up-regulated
Sus_scrofa___UBA7	8.38278	-0.445411	42.1083	3.25635e-07	0.000112633	3	4	Up-regulated
Sus_scrofa___EDN1	6.78007	1.06654	38.8327	3.63385e-07	0.000123045	3	4	Up-regulated
Sus_scrofa___PLEKHA4	4.48631	4.02582	46.789	3.71044e-07	0.000123045	3	4	Up-regulated
Sus_scrofa___ENSSSCG00000024009	5.84172	-1.43231	41.6641	3.72052e-07	0.000123045	3	4	Up-regulated
Sus_scrofa___ACOXL	3.79747	2.85237	46.6483	3.81305e-07	0.000124131	3	4	Up-regulated
Sus_scrofa___ENSSSCG00000035669	6.93613	1.30807	42.0112	3.92081e-07	0.000126154	3	4	Up-regulated
Sus_scrofa___IFNAR1	1.94581	4.74809	46.1346	4.15858e-07	0.000132267	3	4	Up-regulated
Sus_scrofa___TNMD	2.7271	-0.854874	43.6328	4.40658e-07	0.000138562	3	4	Up-regulated
Sus_scrofa___CCDC83	3.25002	0.891665	45.6998	4.67567e-07	0.000143756	3	4	Up-regulated
Sus_scrofa___IFIT1	7.70958	5.94713	45.4177	4.81293e-07	0.00014635	3	4	Up-regulated
Sus_scrofa___BST2	12.1795	3.42364	49.112	5.07021e-07	0.000147768	3	4	Up-regulated
Sus_scrofa___MX1	9.39809	6.01794	44.966	5.08649e-07	0.000147768	3	4	Up-regulated
Sus_scrofa___P2RY12	3.48603	1.84648	45.1049	5.10532e-07	0.000147768	3	4	Up-regulated
Sus_scrofa___PFKP	2.457	4.29312	44.9285	5.1687e-07	0.000147768	3	4	Up-regulated
Sus_scrofa___ERO1A	2.67022	7.53051	44.9119	5.18221e-07	0.000147768	3	4	Up-regulated
Sus_scrofa___BNIP3	2.92038	6.49007	44.8579	5.23337e-07	0.000147768	3	4	Up-regulated
Sus_scrofa___LOXL2	3.82027	5.44199	44.7401	5.34802e-07	0.00014948	3	4	Up-regulated
Sus_scrofa___SESN2	5.25436	3.55637	44.6093	5.54591e-07	0.000153461	3	4	Up-regulated
Sus_scrofa___OAS2	6.62212	6.73592	44.4204	5.67248e-07	0.000155409	3	4	Up-regulated
Sus_scrofa___RIMKLA	3.03076	0.464134	44.5267	5.84173e-07	0.000158477	3	4	Up-regulated
Sus_scrofa___C1RL	2.55006	1.32949	44.3022	5.94728e-07	0.000159011	3	4	Up-regulated
Sus_scrofa___PLEKHO1	2.51429	2.02411	44.1889	5.97635e-07	0.000159011	3	4	Up-regulated
Sus_scrofa___ARHGAP15	3.5294	1.43707	44.0518	6.24821e-07	0.000164661	3	4	Up-regulated
Sus_scrofa___LYN	2.60998	2.09435	43.6918	6.54952e-07	0.000170973	3	4	Up-regulated
Sus_scrofa___BLNK	3.70099	0.581285	43.551	6.73492e-07	0.00017417	3	4	Up-regulated
Sus_scrofa___ENSSSCG00000010517	1.61178	5.31331	43.4209	6.81649e-07	0.000174647	3	4	Up-regulated
Sus_scrofa___ACAP1	4.03707	-0.614509	39.6688	7.73085e-07	0.000196257	3	4	Up-regulated
Sus_scrofa___ENSSSCG00000006395	3.56052	2.42773	42.7064	7.90079e-07	0.000198748	3	4	Up-regulated
Sus_scrofa___ETV5	4.09707	1.6278	42.6574	8.22966e-07	0.000205156	3	4	Up-regulated
Sus_scrofa___TMEM45A	4.07602	1.70908	42.2722	8.69326e-07	0.000214525	3	4	Up-regulated
Sus_scrofa___PRRG4	4.65221	-0.0354639	40.0589	8.76383e-07	0.000214525	3	4	Up-regulated
Sus_scrofa___TBXAS1	3.67798	2.89656	42.0607	8.83806e-07	0.000214525	3	4	Up-regulated
Sus_scrofa___ENSSSCG00000040253	3.72356	-0.433105	39.3278	9.08726e-07	0.000218336	3	4	Up-regulated
Sus_scrofa___ARAP2	4.55789	1.36139	42.0339	9.15287e-07	0.000218336	3	4	Up-regulated
Sus_scrofa___RSAD2	15.2319	6.1515	45.1102	9.74893e-07	0.000230566	3	4	Up-regulated
Sus_scrofa___RAB39B	2.75804	-0.931826	39.2498	9.88841e-07	0.000231883	3	4	Up-regulated
Sus_scrofa___ENSSSCG00000039706	3.37432	-0.997673	38.3436	1.01345e-06	0.000235657	3	4	Up-regulated
Sus_scrofa___CLCN5	2.87912	4.78827	41.2652	1.02456e-06	0.000236256	3	4	Up-regulated
Sus_scrofa___ISG15	12.6949	5.94228	38.8384	1.03434e-06	0.000236539	3	4	Up-regulated
Sus_scrofa___LAX1	4.31499	0.36847	39.4901	1.0739e-06	0.000243572	3	4	Up-regulated
Sus_scrofa___PARP14	7.81024	3.96852	40.6765	1.10244e-06	0.000246654	3	4	Up-regulated
Sus_scrofa___SLCO2A1	6.51487	5.21218	40.9534	1.10692e-06	0.000246654	3	4	Up-regulated
Sus_scrofa___SPAG1	1.95263	3.18866	40.7585	1.13087e-06	0.000246654	3	4	Up-regulated
Sus_scrofa___BICDL2	4.89259	1.84415	40.8931	1.13135e-06	0.000246654	3	4	Up-regulated
Sus_scrofa___ECM1	5.78063	-1.41336	34.6837	1.13941e-06	0.000246654	3	4	Up-regulated
Sus_scrofa___ENSSSCG00000008898	5.62317	0.684628	36.775	1.14175e-06	0.000246654	3	4	Up-regulated
Sus_scrofa___KLK8	3.90041	-0.417165	38.7304	1.14988e-06	0.000246654	3	4	Up-regulated
Sus_scrofa___CCDC194	3.76027	0.517348	39.1951	1.16088e-06	0.000247097	3	4	Up-regulated
Sus_scrofa___ENSSSCG00000017754	4.15183	3.60883	40.5458	1.18188e-06	0.000247901	3	4	Up-regulated
Sus_scrofa___BHLHE41	8.3943	-0.357597	43.8062	1.18257e-06	0.000247901	3	4	Up-regulated
Sus_scrofa___FERMT3	3.41113	2.27639	40.3224	1.24753e-06	0.000257615	3	4	Up-regulated
Sus_scrofa___ENSSSCG00000025593	6.34168	1.44459	36.6745	1.30826e-06	0.000268154	3	4	Up-regulated
Sus_scrofa___KLF10	4.61368	2.42004	39.9138	1.35745e-06	0.000274175	3	4	Up-regulated
Sus_scrofa___ENSSSCG00000001396	4.08218	-0.612671	35.8036	1.47472e-06	0.000293575	3	4	Up-regulated
Sus_scrofa___ENSSSCG00000022246	5.1396	-0.462018	34.05	1.50559e-06	0.000295848	3	4	Up-regulated
Sus_scrofa___SLC1A4	2.72637	4.22798	39.2882	1.50752e-06	0.000295848	3	4	Up-regulated
Sus_scrofa___MMP25	5.6194	2.4874	39.1081	1.52434e-06	0.000297042	3	4	Up-regulated
Sus_scrofa___FYB1	2.64422	1.32592	39.1592	1.58196e-06	0.000303988	3	4	Up-regulated
Sus_scrofa___CCL5	7.11823	3.32215	38.9815	1.63024e-06	0.000308975	3	4	Up-regulated
Sus_scrofa___IFIT2	6.39045	4.64706	38.9284	1.64774e-06	0.000310167	3	4	Up-regulated
Sus_scrofa___LURAP1L	6.42664	2.0741	38.3753	1.78422e-06	0.000331908	3	4	Up-regulated
Sus_scrofa___PLSCR1	3.10795	4.38315	38.4162	1.79398e-06	0.000331908	3	4	Up-regulated
Sus_scrofa___ENSSSCG00000032436	8.57607	1.96966	33.1475	1.79922e-06	0.000331908	3	4	Up-regulated
Sus_scrofa___DUSP4	5.75567	1.91816	38.0062	1.84342e-06	0.000335903	3	4	Up-regulated
Sus_scrofa___LAD1	3.21482	-0.426	37.1829	1.85911e-06	0.000335903	3	4	Up-regulated
Sus_scrofa___HES1	3.44645	3.17281	38.2273	1.8668e-06	0.000335903	3	4	Up-regulated
Sus_scrofa___TMEM51	4.81057	0.727309	38.1121	1.86943e-06	0.000335903	3	4	Up-regulated
Sus_scrofa___CPLX4	2.40872	0.797004	38.3311	1.8948e-06	0.000338264	3	4	Up-regulated
Sus_scrofa___IMPDH1	4.11362	-1.1565	31.9148	1.93649e-06	0.00034349	3	4	Up-regulated
Sus_scrofa___IKBKE	3.97186	-0.00257302	36.3456	1.98902e-06	0.000350561	3	4	Up-regulated
Sus_scrofa___DUSP5	7.16607	3.29514	36.2857	2.07901e-06	0.000361813	3	4	Up-regulated
Sus_scrofa___TRIM72	3.30732	1.43237	37.5883	2.17129e-06	0.000372932	3	4	Up-regulated
Sus_scrofa___P2RY14	4.11445	1.04526	37.3353	2.1896e-06	0.000372932	3	4	Up-regulated
Sus_scrofa___TLL2	2.94343	4.04025	37.3887	2.21029e-06	0.000372932	3	4	Up-regulated
Sus_scrofa___MAN1A1	4.03744	2.65701	37.3463	2.27185e-06	0.000380996	3	4	Up-regulated
Sus_scrofa___LONRF3	4.80623	5.26803	37.171	2.31054e-06	0.000385151	3	4	Up-regulated
Sus_scrofa___CCDC180	2.81042	5.73561	37.127	2.33035e-06	0.000386126	3	4	Up-regulated
Sus_scrofa___MIDN	2.3219	4.33904	36.8884	2.44816e-06	0.000402038	3	4	Up-regulated
Sus_scrofa___TMEFF2	2.72586	0.768476	37.0462	2.45544e-06	0.000402038	3	4	Up-regulated
Sus_scrofa___SIGLEC1	4.77847	0.457107	36.4903	2.48005e-06	0.000403679	3	4	Up-regulated
Sus_scrofa___ENSSSCG00000036618	3.85078	-1.06674	32.0425	2.5103e-06	0.000406213	3	4	Up-regulated
Sus_scrofa___TRIOBP	1.92779	4.11582	36.7147	2.53781e-06	0.000408278	3	4	Up-regulated
Sus_scrofa___CAMK1	1.77801	2.80628	36.6472	2.57706e-06	0.000412195	3	4	Up-regulated
Sus_scrofa___CCL4	6.10061	1.2795	35.3671	2.62537e-06	0.00041751	3	4	Up-regulated
Sus_scrofa___RASSF1	2.80056	4.01109	36.4166	2.70003e-06	0.000426929	3	4	Up-regulated
Sus_scrofa___ARID5A	3.52355	4.73141	36.245	2.79967e-06	0.000438452	3	4	Up-regulated
Sus_scrofa___FUT11	1.76879	2.96165	36.2385	2.8046e-06	0.000438452	3	4	Up-regulated
Sus_scrofa___ENSSSCG00000023041	3.75479	5.17803	35.8222	3.05598e-06	0.000472414	3	4	Up-regulated
Sus_scrofa___LAT2	2.02301	2.49894	35.6771	3.1639e-06	0.000484987	3	4	Up-regulated
Sus_scrofa___ENSSSCG00000051689	3.10277	0.325377	35.4078	3.17237e-06	0.000484987	3	4	Up-regulated
Sus_scrofa___PMAIP1	5.05413	-1.1108	30.2186	3.22095e-06	0.000489709	3	4	Up-regulated
Sus_scrofa___NUPR1	2.05868	2.73247	35.5099	3.26906e-06	0.000494306	3	4	Up-regulated
Sus_scrofa___MAP2K1	1.40633	6.45416	35.4266	3.32109e-06	0.000496745	3	4	Up-regulated
Sus_scrofa___TRIM26	3.65941	3.7561	35.3757	3.36184e-06	0.000500137	3	4	Up-regulated
Sus_scrofa___STK17A	2.57472	2.79942	35.2719	3.44306e-06	0.000509481	3	4	Up-regulated
Sus_scrofa___COL1A1	5.36842	1.08402	34.1697	3.47862e-06	0.000509603	3	4	Up-regulated
Sus_scrofa___TRAIP	2.5072	2.8746	35.2134	3.48072e-06	0.000509603	3	4	Up-regulated
Sus_scrofa___RNF32	2.81283	0.407035	35.3228	3.53309e-06	0.000514548	3	4	Up-regulated
Sus_scrofa___GSTT4	5.3712	-0.107768	32.6414	3.62454e-06	0.000519661	3	4	Up-regulated
Sus_scrofa___PCSK5	2.55793	8.51053	34.8779	3.73165e-06	0.000530754	3	4	Up-regulated
Sus_scrofa___IGFBP2	7.65193	3.9293	34.7742	3.78466e-06	0.000530754	3	4	Up-regulated
Sus_scrofa___THOC6	3.03379	4.32726	34.6596	3.91149e-06	0.000539586	3	4	Up-regulated
Sus_scrofa___ERAP2	4.01506	1.28987	34.8589	3.91951e-06	0.000539586	3	4	Up-regulated
Sus_scrofa___NRIP2	4.60719	-2.25086	28.7417	3.94248e-06	0.000540061	3	4	Up-regulated
Sus_scrofa___EDEM1	1.75795	3.39282	34.5661	3.99227e-06	0.000541521	3	4	Up-regulated
Sus_scrofa___PAQR7	3.61716	-1.91659	28.2077	4.08603e-06	0.000551534	3	4	Up-regulated
Sus_scrofa___PDCD4	2.34661	6.48254	34.1678	4.34652e-06	0.000579704	3	4	Up-regulated
Sus_scrofa___ENSSSCG00000015390	4.073	0.0257365	32.4967	4.35757e-06	0.000579704	3	4	Up-regulated
Sus_scrofa___ENSSSCG00000003421	2.26079	3.39137	34.0208	4.49089e-06	0.000588945	3	4	Up-regulated
Sus_scrofa___WT1	6.39133	-1.97296	31.3205	4.7257e-06	0.000613588	3	4	Up-regulated
Sus_scrofa___PSMB8	9.18448	1.319	33.8957	4.7279e-06	0.000613588	3	4	Up-regulated
Sus_scrofa___ODC1	2.37536	3.5794	33.7663	4.74532e-06	0.000613588	3	4	Up-regulated
Sus_scrofa___DEPDC1B	2.45803	2.90725	33.6867	4.83246e-06	0.000621949	3	4	Up-regulated
Sus_scrofa___NLRC5	5.3256	6.31647	33.608	4.91023e-06	0.000629032	3	4	Up-regulated
Sus_scrofa___ENSSSCG00000028691	2.81472	2.50605	33.1697	5.46546e-06	0.000689903	3	4	Up-regulated
Sus_scrofa___MECOM	3.738	2.62134	33.1258	5.48512e-06	0.000689903	3	4	Up-regulated
Sus_scrofa___ENSSSCG00000007944	3.27007	0.567876	33.2364	5.56665e-06	0.000693998	3	4	Up-regulated
Sus_scrofa___ZNF395	1.18735	6.6497	33.001	5.60788e-06	0.000693998	3	4	Up-regulated
Sus_scrofa___CTSH	2.64819	3.9695	32.9959	5.618e-06	0.000693998	3	4	Up-regulated
Sus_scrofa___SCD	8.14888	-0.550494	34.0308	5.73909e-06	0.000699588	3	4	Up-regulated
Sus_scrofa___NPDC1	4.90513	-1.48883	28.9522	5.81349e-06	0.000699961	3	4	Up-regulated
Sus_scrofa___CKB	4.96545	0.888771	32.2669	5.84334e-06	0.000699961	3	4	Up-regulated
Sus_scrofa___IRAK3	2.46804	3.83132	32.7767	5.89586e-06	0.000703209	3	4	Up-regulated
Sus_scrofa___CMPK2	11.0296	4.19918	32.8979	6.15753e-06	0.000725043	3	4	Up-regulated
Sus_scrofa___LRRC6	2.36264	2.38095	32.5438	6.22811e-06	0.000727513	3	4	Up-regulated
Sus_scrofa___STX12	1.29966	6.47538	32.5209	6.2374e-06	0.000727513	3	4	Up-regulated
Sus_scrofa___ENSSSCG00000049674	3.74524	1.21275	32.4301	6.25739e-06	0.000727513	3	4	Up-regulated
Sus_scrofa___GPNMB	1.9363	4.47882	32.3757	6.44397e-06	0.000746071	3	4	Up-regulated
Sus_scrofa___CXCL11	4.81898	-0.0947922	28.8577	6.49388e-06	0.000748717	3	4	Up-regulated
Sus_scrofa___ST8SIA2	4.32573	-1.18662	28.7971	6.59713e-06	0.000754336	3	4	Up-regulated
Sus_scrofa___REC8	4.76498	0.780555	31.6282	6.73324e-06	0.000763588	3	4	Up-regulated
Sus_scrofa___KRT80	2.76334	5.30894	32.1303	6.80727e-06	0.000768833	3	4	Up-regulated
Sus_scrofa___NEDD4	3.7089	2.40545	31.9383	7.14924e-06	0.000800917	3	4	Up-regulated
Sus_scrofa___SLCO4C1	3.99721	3.58481	31.8426	7.2715e-06	0.00081133	3	4	Up-regulated
Sus_scrofa___TNFRSF1B	4.38183	-1.57094	26.4535	7.32181e-06	0.000813662	3	4	Up-regulated
Sus_scrofa___PREX1	3.31548	1.15192	31.7201	7.66675e-06	0.000842727	3	4	Up-regulated
Sus_scrofa___GPR171	4.1635	-0.0537558	30.637	7.67472e-06	0.000842727	3	4	Up-regulated
Sus_scrofa___ERBB3	2.26586	3.72811	31.5273	7.80108e-06	0.000853216	3	4	Up-regulated
Sus_scrofa___ENSSSCG00000015823	2.76414	1.31275	31.5786	7.91137e-06	0.000861438	3	4	Up-regulated
Sus_scrofa___NPPB	7.04892	6.88213	31.4533	7.93852e-06	0.000861438	3	4	Up-regulated
Sus_scrofa___FLRT2	6.73915	4.58337	31.3975	8.1387e-06	0.000876288	3	4	Up-regulated
Sus_scrofa___HAP1	2.63755	-0.315403	30.7303	8.8451e-06	0.0009332	3	4	Up-regulated
Sus_scrofa___MCUB	1.911	2.34601	30.9638	8.89459e-06	0.0009332	3	4	Up-regulated
Sus_scrofa___BNIP3L	1.56215	5.28851	30.9454	8.90336e-06	0.0009332	3	4	Up-regulated
Sus_scrofa___ENSSSCG00000035799	3.55107	0.241209	30.2073	9.11526e-06	0.000950991	3	4	Up-regulated
Sus_scrofa___STX11	2.29423	3.04216	30.8102	9.20491e-06	0.000953966	3	4	Up-regulated
Sus_scrofa___TTC39C	2.70227	0.990052	30.8232	9.42966e-06	0.000967885	3	4	Up-regulated
Sus_scrofa___WSB2	1.30783	5.94249	30.6811	9.46037e-06	0.000967885	3	4	Up-regulated
Sus_scrofa___GCA	3.5759	0.839503	30.8359	9.48942e-06	0.000967885	3	4	Up-regulated
Sus_scrofa___MCF2L2	1.78245	4.38561	30.579	9.68775e-06	0.00098194	3	4	Up-regulated
Sus_scrofa___CD200	4.93172	-0.89335	27.019	1.01755e-05	0.00101648	3	4	Up-regulated
Sus_scrofa___CRELD2	2.64173	0.373212	30.3784	1.05239e-05	0.00104002	3	4	Up-regulated
Sus_scrofa___NMI	4.91198	1.10054	29.2492	1.05902e-05	0.00104125	3	4	Up-regulated
Sus_scrofa___PKM	1.01571	7.10014	30.1729	1.0641e-05	0.00104125	3	4	Up-regulated
Sus_scrofa___DNAJB9	1.80973	4.00978	30.0364	1.099e-05	0.00106703	3	4	Up-regulated
Sus_scrofa___ENSSSCG00000022925	2.39948	7.18871	29.9444	1.12232e-05	0.00108486	3	4	Up-regulated
Sus_scrofa___NES	4.37361	3.78189	29.957	1.12521e-05	0.00108486	3	4	Up-regulated
Sus_scrofa___AANAT	3.19006	-0.371461	29.4792	1.15723e-05	0.00111186	3	4	Up-regulated
Sus_scrofa___NAB2	3.35609	0.337021	29.8083	1.16917e-05	0.00111559	3	4	Up-regulated
Sus_scrofa___B3GNT5	1.62271	2.14382	29.733	1.1842e-05	0.00112219	3	4	Up-regulated
Sus_scrofa___MEIS3	4.1161	-1.66176	24.7352	1.19382e-05	0.00112651	3	4	Up-regulated
Sus_scrofa___LIPH	3.15144	-0.875088	27.789	1.22317e-05	0.00114733	3	4	Up-regulated
Sus_scrofa___CSDC2	3.10522	1.86653	29.4524	1.27505e-05	0.00117415	3	4	Up-regulated
Sus_scrofa___ENSSSCG00000035371	4.81373	0.544377	29.0346	1.28303e-05	0.00117415	3	4	Up-regulated
Sus_scrofa___MAP1A	4.12459	1.10366	29.2872	1.28899e-05	0.00117415	3	4	Up-regulated
Sus_scrofa___TMCC3	3.04593	3.91179	29.3546	1.28995e-05	0.00117415	3	4	Up-regulated
Sus_scrofa___ENSSSCG00000001229	6.44058	4.97364	29.1382	1.30405e-05	0.00117923	3	4	Up-regulated
Sus_scrofa___CNN1	3.59144	5.41829	29.2403	1.32486e-05	0.00119414	3	4	Up-regulated
Sus_scrofa___RPP30	3.06568	8.83302	29.1737	1.34545e-05	0.00120486	3	4	Up-regulated
Sus_scrofa___KCTD8	2.64034	3.00905	29.1626	1.35118e-05	0.00120608	3	4	Up-regulated
Sus_scrofa___RHOU	3.58607	0.567776	28.7785	1.37314e-05	0.00121782	3	4	Up-regulated
Sus_scrofa___TACR2	2.9217	4.2009	29.006	1.40077e-05	0.00123836	3	4	Up-regulated
Sus_scrofa___RET	3.77922	-1.71745	24.3594	1.40783e-05	0.00124005	3	4	Up-regulated
Sus_scrofa___KLF2	4.15229	0.820527	28.9844	1.44315e-05	0.00126371	3	4	Up-regulated
Sus_scrofa___G6PD	1.78479	2.18657	28.8789	1.44989e-05	0.0012656	3	4	Up-regulated
Sus_scrofa___IFIT5	3.45405	4.34443	28.8486	1.45445e-05	0.0012656	3	4	Up-regulated
Sus_scrofa___ENSSSCG00000034570	11.4982	6.03672	26.4441	1.55293e-05	0.00134285	3	4	Up-regulated
Sus_scrofa___P4HA1	2.38966	7.88923	28.5353	1.56676e-05	0.00135059	3	4	Up-regulated
Sus_scrofa___ANO6	4.13438	5.92611	28.4989	1.58278e-05	0.00136016	3	4	Up-regulated
Sus_scrofa___BATF2	4.04133	-0.211057	26.1789	1.58859e-05	0.00136092	3	4	Up-regulated
Sus_scrofa___SLC22A15	1.65469	7.93891	28.2772	1.66717e-05	0.00141946	3	4	Up-regulated
Sus_scrofa___PANX1	3.95682	1.03247	28.2554	1.71241e-05	0.00144906	3	4	Up-regulated
Sus_scrofa___OAF	5.46707	-2.52888	24.4132	1.7339e-05	0.00146276	3	4	Up-regulated
Sus_scrofa___NFKBIE	2.99437	-0.696993	27.0977	1.76269e-05	0.00147804	3	4	Up-regulated
Sus_scrofa___ENSSSCG00000051243	2.41236	0.851652	28.1144	1.7734e-05	0.00148253	3	4	Up-regulated
Sus_scrofa___LGALS3BP	7.8362	2.25256	25.9541	1.79988e-05	0.00149165	3	4	Up-regulated
Sus_scrofa___NRCAM	2.98642	6.17528	27.9343	1.81174e-05	0.00149165	3	4	Up-regulated
Sus_scrofa___SP110	4.90268	3.03649	27.9702	1.81695e-05	0.00149165	3	4	Up-regulated
Sus_scrofa___ENSSSCG00000014997	5.40677	1.58045	27.9273	1.82263e-05	0.00149165	3	4	Up-regulated
Sus_scrofa___CD200R1	3.64514	-0.783861	26.2247	1.82983e-05	0.00149165	3	4	Up-regulated
Sus_scrofa___PLAC9	4.02955	-1.82754	24.2736	1.83717e-05	0.00149165	3	4	Up-regulated
Sus_scrofa___SLCO4A1	4.51294	-2.03313	23.377	1.84268e-05	0.00149165	3	4	Up-regulated
Sus_scrofa___ARSB	2.9327	0.758364	27.9917	1.84405e-05	0.00149165	3	4	Up-regulated
Sus_scrofa___SLC37A2	2.24046	1.92446	27.8326	1.87271e-05	0.00149165	3	4	Up-regulated
Sus_scrofa___COQ10B	1.43962	5.08542	27.796	1.87359e-05	0.00149165	3	4	Up-regulated
Sus_scrofa___ZNF503	6.30704	-2.0811	25.7156	1.87595e-05	0.00149165	3	4	Up-regulated
Sus_scrofa___ZDHHC14	4.15555	5.10063	27.7805	1.88198e-05	0.00149216	3	4	Up-regulated
Sus_scrofa___ENSSSCG00000038200	2.66681	-0.729886	26.4798	1.88927e-05	0.00149366	3	4	Up-regulated
Sus_scrofa___RASGRF1	2.23433	2.02229	27.7329	1.91117e-05	0.00150238	3	4	Up-regulated
Sus_scrofa___CDH24	2.57643	0.478963	27.7896	1.94314e-05	0.00152319	3	4	Up-regulated
Sus_scrofa___KAZN	1.45324	4.51404	27.4932	2.01762e-05	0.00156386	3	4	Up-regulated
Sus_scrofa___ZNF484	2.14624	2.40033	27.3069	2.11757e-05	0.00162765	3	4	Up-regulated
Sus_scrofa___SPECC1	2.41838	6.13172	27.2832	2.12415e-05	0.00162818	3	4	Up-regulated
Sus_scrofa___EXOSC1	1.77757	3.46216	27.2649	2.13479e-05	0.00163182	3	4	Up-regulated
Sus_scrofa___CEBPG	1.5249	3.93203	27.2337	2.15075e-05	0.00163948	3	4	Up-regulated
Sus_scrofa___ENSSSCG00000000703	2.92879	-0.748532	26.4374	2.19441e-05	0.0016636	3	4	Up-regulated
Sus_scrofa___KCNC3	2.8108	0.517414	27.1637	2.2449e-05	0.00168801	3	4	Up-regulated
Sus_scrofa___ACOT12	2.56412	2.14659	27.0614	2.25722e-05	0.00168886	3	4	Up-regulated
Sus_scrofa___ENSSSCG00000002941	3.70907	0.333979	26.9975	2.25824e-05	0.00168886	3	4	Up-regulated
Sus_scrofa___MFRP	3.15993	0.631301	27.1521	2.26942e-05	0.00169265	3	4	Up-regulated
Sus_scrofa___KDELR3	3.3634	1.58843	26.9463	2.3481e-05	0.00174194	3	4	Up-regulated
Sus_scrofa___TRIM14	3.40912	0.304049	26.9097	2.36924e-05	0.00175292	3	4	Up-regulated
Sus_scrofa___PLEKHB1	2.64168	-1.00157	25.4906	2.39071e-05	0.0017594	3	4	Up-regulated
Sus_scrofa___MCHR2	6.40226	0.135694	28.1187	2.4189e-05	0.00177542	3	4	Up-regulated
Sus_scrofa___TNNT1	2.16537	5.2266	26.7316	2.43503e-05	0.00177783	3	4	Up-regulated
Sus_scrofa___DDX60	7.10035	5.97667	26.6844	2.4706e-05	0.00179905	3	4	Up-regulated
Sus_scrofa___LTBP4	4.57003	0.0578387	25.1699	2.4897e-05	0.0018082	3	4	Up-regulated
Sus_scrofa___FSTL3	2.09428	4.42708	26.5944	2.52004e-05	0.00182545	3	4	Up-regulated
Sus_scrofa___ENSSSCG00000006350	3.81876	2.68483	26.5751	2.54143e-05	0.00183613	3	4	Up-regulated
Sus_scrofa___GDAP1	2.65175	0.85792	26.6065	2.58094e-05	0.00185982	3	4	Up-regulated
Sus_scrofa___STUM	3.41786	-0.137204	25.2396	2.59855e-05	0.00186765	3	4	Up-regulated
Sus_scrofa___ENSSSCG00000033553	3.20934	-1.67351	24.1778	2.62809e-05	0.00187999	3	4	Up-regulated
Sus_scrofa___TSHZ3	3.45907	-1.26726	24.1477	2.66994e-05	0.00190412	3	4	Up-regulated
Sus_scrofa___GPRC5B	2.80352	-0.874823	25.4927	2.67695e-05	0.00190421	3	4	Up-regulated
Sus_scrofa___CMAS	1.73107	4.25369	26.3332	2.69041e-05	0.00190888	3	4	Up-regulated
Sus_scrofa___ENSSSCG00000012006	3.15979	4.4329	26.2561	2.74365e-05	0.00194168	3	4	Up-regulated
Sus_scrofa___CEACAM19	1.92738	-0.201276	25.9143	2.75319e-05	0.00194346	3	4	Up-regulated
Sus_scrofa___ENSSSCG00000047663	2.59969	0.138295	26.0919	2.88925e-05	0.00202184	3	4	Up-regulated
Sus_scrofa___GK5	1.66644	4.8631	26.0438	2.89345e-05	0.00202184	3	4	Up-regulated
Sus_scrofa___FAM162A	0.99446	6.85802	25.9424	2.96814e-05	0.0020637	3	4	Up-regulated
Sus_scrofa___NETO1	2.76199	1.1475	25.8493	3.08662e-05	0.00213525	3	4	Up-regulated
Sus_scrofa___ENSSSCG00000044640	3.095	-0.568917	25.1906	3.11538e-05	0.00214935	3	4	Up-regulated
Sus_scrofa___NMU	2.48463	-0.95357	24.3536	3.12254e-05	0.00214935	3	4	Up-regulated
Sus_scrofa___PARP9	5.42844	3.69229	25.6963	3.18214e-05	0.00217698	3	4	Up-regulated
Sus_scrofa___EVA1C	1.74035	6.48529	25.6561	3.19179e-05	0.00217698	3	4	Up-regulated
Sus_scrofa___PPP2R2C	2.26681	1.39675	25.6963	3.19791e-05	0.00217698	3	4	Up-regulated
Sus_scrofa___RNF165	2.59747	3.36316	25.6041	3.23675e-05	0.0021952	3	4	Up-regulated
Sus_scrofa___ENSSSCG00000034802	7.24294	-1.48795	23.2712	3.27924e-05	0.00221703	3	4	Up-regulated
Sus_scrofa___MET	3.27075	0.532591	25.5553	3.33738e-05	0.00224693	3	4	Up-regulated
Sus_scrofa___BACE2	1.56397	7.06724	25.4342	3.37772e-05	0.00226687	3	4	Up-regulated
Sus_scrofa___IL12RB2	2.43568	2.06675	25.4478	3.38338e-05	0.00226687	3	4	Up-regulated
Sus_scrofa___SLC22A17	4.15786	-1.48846	22.3773	3.41592e-05	0.00227068	3	4	Up-regulated
Sus_scrofa___LIMK1	1.53885	3.62346	25.3903	3.41789e-05	0.00227068	3	4	Up-regulated
Sus_scrofa___CGNL1	4.88559	1.87303	25.4435	3.42099e-05	0.00227068	3	4	Up-regulated
Sus_scrofa___SERPINB2	3.16685	6.23496	25.3835	3.4219e-05	0.00227068	3	4	Up-regulated
Sus_scrofa___PRICKLE3	1.37602	3.38761	25.349	3.45387e-05	0.00228641	3	4	Up-regulated
Sus_scrofa___PIEZO1	3.65724	-0.294849	24.9263	3.51431e-05	0.00231534	3	4	Up-regulated
Sus_scrofa___CD86	2.8574	-0.592513	24.7875	3.59602e-05	0.00235795	3	4	Up-regulated
Sus_scrofa___PARP8	4.38411	1.18243	25.162	3.61096e-05	0.00236215	3	4	Up-regulated
Sus_scrofa___PRSS48	3.587	0.176911	25.0544	3.63014e-05	0.0023691	3	4	Up-regulated
Sus_scrofa___ENSSSCG00000021401	2.81747	-0.529108	24.5948	3.75533e-05	0.00243929	3	4	Up-regulated
Sus_scrofa___RHBDF2	2.44048	1.83263	25.0323	3.76497e-05	0.00243983	3	4	Up-regulated
Sus_scrofa___FAM89A	4.41986	-1.37973	22.1942	3.81185e-05	0.00246444	3	4	Up-regulated
Sus_scrofa___SPRY1	3.19978	3.38617	24.933	3.84544e-05	0.00248036	3	4	Up-regulated
Sus_scrofa___ENSSSCG00000049262	3.65183	-1.70716	21.1671	3.86804e-05	0.00248583	3	4	Up-regulated
Sus_scrofa___GHSR	4.27116	2.7428	24.9734	3.87189e-05	0.00248583	3	4	Up-regulated
Sus_scrofa___REEP2	1.94585	0.969026	24.9535	3.88297e-05	0.00248717	3	4	Up-regulated
Sus_scrofa___INHA	2.03432	3.09264	24.8754	3.903e-05	0.00249423	3	4	Up-regulated
Sus_scrofa___P4HB	1.52148	3.69416	24.8499	3.92729e-05	0.00250397	3	4	Up-regulated
Sus_scrofa___ARFGAP3	1.33309	6.87643	24.8192	3.95696e-05	0.00251708	3	4	Up-regulated
Sus_scrofa___BTBD19	3.84128	-1.89295	21.4438	3.99322e-05	0.00252844	3	4	Up-regulated
Sus_scrofa___TEK	4.00014	-1.33365	22.2915	4.0053e-05	0.00252844	3	4	Up-regulated
Sus_scrofa___KLF7	2.19751	5.98619	24.7666	4.01136e-05	0.00252844	3	4	Up-regulated
Sus_scrofa___S100A6	3.53171	-0.563009	21.1709	4.08866e-05	0.0025713	3	4	Up-regulated
Sus_scrofa___ANKRD2	4.34239	4.36275	24.6109	4.18351e-05	0.00260825	3	4	Up-regulated
Sus_scrofa___IFIH1	6.99659	6.2752	24.5873	4.20941e-05	0.00260825	3	4	Up-regulated
Sus_scrofa___LRRC36	1.69758	0.578256	24.6513	4.21165e-05	0.00260825	3	4	Up-regulated
Sus_scrofa___PIK3R6	2.00908	0.309428	24.6447	4.21339e-05	0.00260825	3	4	Up-regulated
Sus_scrofa___SH3BP4	2.64486	1.0343	24.6281	4.25158e-05	0.00262363	3	4	Up-regulated
Sus_scrofa___LPCAT1	3.48255	-0.754094	23.322	4.25721e-05	0.00262363	3	4	Up-regulated
Sus_scrofa___LIN7A	3.88456	1.98896	24.4694	4.37171e-05	0.00267736	3	4	Up-regulated
Sus_scrofa___MAP3K1	1.31949	5.08771	24.4348	4.37341e-05	0.00267736	3	4	Up-regulated
Sus_scrofa___SLC16A12	3.55893	2.25835	24.3999	4.44738e-05	0.0027077	3	4	Up-regulated
Sus_scrofa___RAB3B	3.42199	2.36501	24.3018	4.56591e-05	0.002757	3	4	Up-regulated
Sus_scrofa___ENSSSCG00000047274	2.3111	1.43335	24.2943	4.57899e-05	0.002757	3	4	Up-regulated
Sus_scrofa___POU1F1	2.48799	0.596917	24.2988	4.58321e-05	0.002757	3	4	Up-regulated
Sus_scrofa___KDM4C	1.04137	8.55458	24.2471	4.59343e-05	0.00275716	3	4	Up-regulated
Sus_scrofa___PIK3CG	3.40973	-0.220418	23.6768	4.62982e-05	0.00277298	3	4	Up-regulated
Sus_scrofa___FAM151A	3.36147	2.55413	24.169	4.69165e-05	0.00279301	3	4	Up-regulated
Sus_scrofa___GPR152	2.43149	-1.0744	23.2656	4.69355e-05	0.00279301	3	4	Up-regulated
Sus_scrofa___ENSSSCG00000009208	1.14739	6.50362	24.1544	4.70655e-05	0.00279356	3	4	Up-regulated
Sus_scrofa___MGAT4A	1.65008	6.15707	24.1479	4.71466e-05	0.00279356	3	4	Up-regulated
Sus_scrofa___MACROD2	1.99693	7.20422	24.1175	4.7524e-05	0.00280991	3	4	Up-regulated
Sus_scrofa___RELB	1.83353	3.99084	24.0963	4.78034e-05	0.0028204	3	4	Up-regulated
Sus_scrofa___LOXL4	3.00356	1.3614	24.0906	4.80238e-05	0.00282289	3	4	Up-regulated
Sus_scrofa___LAMA3	1.74823	2.31426	24.0837	4.80496e-05	0.00282289	3	4	Up-regulated
Sus_scrofa___DBNDD2	1.1536	3.58901	24.0571	4.83028e-05	0.00283175	3	4	Up-regulated
Sus_scrofa___ADAMTS17	2.06736	3.08673	24.0276	4.87063e-05	0.00284336	3	4	Up-regulated
Sus_scrofa___SLC7A5	4.61039	-1.36382	21.9237	4.93452e-05	0.00286855	3	4	Up-regulated
Sus_scrofa___RBM44	1.39022	2.98369	23.9564	4.96243e-05	0.00287873	3	4	Up-regulated
Sus_scrofa___PARP12	6.31038	5.69912	23.8769	5.07301e-05	0.00293059	3	4	Up-regulated
Sus_scrofa___HELB	1.57308	4.42595	23.7794	5.19721e-05	0.00298365	3	4	Up-regulated
Sus_scrofa___MTPN	1.58196	7.06356	23.7306	5.26381e-05	0.00301563	3	4	Up-regulated
Sus_scrofa___PLEKHS1	2.83624	1.93917	23.6507	5.4041e-05	0.00307669	3	4	Up-regulated
Sus_scrofa___CLEC7A	2.91702	-1.44445	21.6887	5.41487e-05	0.00307669	3	4	Up-regulated
Sus_scrofa___NARF	1.37532	5.29683	23.5865	5.46951e-05	0.00308871	3	4	Up-regulated
Sus_scrofa___BRSK2	3.51722	-0.855214	22.1869	5.50331e-05	0.00309942	3	4	Up-regulated
Sus_scrofa___MROH5	2.98856	4.05391	23.5557	5.51693e-05	0.00309942	3	4	Up-regulated
Sus_scrofa___RPL31	2.01398	6.41649	23.4335	5.69707e-05	0.00318472	3	4	Up-regulated
Sus_scrofa___BAALC	3.68107	1.81659	23.4539	5.76594e-05	0.00321025	3	4	Up-regulated
Sus_scrofa___NFKBIZ	4.05669	-0.52787	22.3524	5.84341e-05	0.00324034	3	4	Up-regulated
Sus_scrofa___TNFAIP3	2.80394	2.18319	23.3252	5.89106e-05	0.00325671	3	4	Up-regulated
Sus_scrofa___KLF4	2.91043	1.41052	23.3616	5.90186e-05	0.00325671	3	4	Up-regulated
Sus_scrofa___ERICH6	3.77287	2.61849	23.3095	5.90824e-05	0.00325671	3	4	Up-regulated
Sus_scrofa___WDR54	2.71318	-0.647118	21.8307	5.9358e-05	0.0032654	3	4	Up-regulated
Sus_scrofa___SSUH2	2.35446	0.355107	23.3188	5.9676e-05	0.00327498	3	4	Up-regulated
Sus_scrofa___PRRT3	2.74812	-0.940551	22.1974	5.98853e-05	0.00327498	3	4	Up-regulated
Sus_scrofa___PRKCB	1.58618	3.04588	23.2413	6.00177e-05	0.00327564	3	4	Up-regulated
Sus_scrofa___ISG12(A)	9.04647	5.82284	22.8854	6.0205e-05	0.0032794	3	4	Up-regulated
Sus_scrofa___GAPDH	2.15657	5.95545	23.1471	6.15127e-05	0.00332445	3	4	Up-regulated
Sus_scrofa___TDRD1	2.32897	0.056347	22.9096	6.35598e-05	0.00341507	3	4	Up-regulated
Sus_scrofa___SYT11	2.1932	2.5764	23.0197	6.37622e-05	0.00341931	3	4	Up-regulated
Sus_scrofa___TAGLN	6.71833	-1.71768	22.0089	6.44073e-05	0.00344153	3	4	Up-regulated
Sus_scrofa___ADORA2A	2.78822	0.566763	23.073	6.44253e-05	0.00344153	3	4	Up-regulated
Sus_scrofa___ENSSSCG00000048901	2.85813	-0.226193	22.7277	6.55137e-05	0.00349293	3	4	Up-regulated
Sus_scrofa___TEAD4	1.39052	6.21257	22.8696	6.62909e-05	0.0035208	3	4	Up-regulated
Sus_scrofa___B2M	2.46784	6.41151	22.8344	6.69261e-05	0.00354772	3	4	Up-regulated
Sus_scrofa___LIPA	2.72331	6.09068	22.8215	6.71592e-05	0.00355328	3	4	Up-regulated
Sus_scrofa___EDAR	3.25692	-1.23573	21.1645	6.81697e-05	0.003593	3	4	Up-regulated
Sus_scrofa___PLOD2	3.08281	5.90944	22.6775	6.98351e-05	0.00366681	3	4	Up-regulated
Sus_scrofa___HS3ST1	2.89693	-0.103899	22.55	7.01027e-05	0.00366956	3	4	Up-regulated
Sus_scrofa___EGLN3	1.42964	6.54596	22.6606	7.01528e-05	0.00366956	3	4	Up-regulated
Sus_scrofa___CPNE6	3.11377	-1.36641	20.7059	7.03573e-05	0.00367332	3	4	Up-regulated
Sus_scrofa___ENSSSCG00000010448	1.61874	4.50106	22.5969	7.1386e-05	0.00371369	3	4	Up-regulated
Sus_scrofa___SOBP	3.02443	0.291489	22.4241	7.28061e-05	0.00376658	3	4	Up-regulated
Sus_scrofa___NUAK2	2.27242	1.6452	22.528	7.32327e-05	0.00376658	3	4	Up-regulated
Sus_scrofa___PLPP5	1.62749	1.18869	22.4476	7.52051e-05	0.00382537	3	4	Up-regulated
Sus_scrofa___C1QA	3.91486	-1.91686	19.7256	7.59696e-05	0.00385717	3	4	Up-regulated
Sus_scrofa___APH1B	2.55769	2.00393	22.35	7.67219e-05	0.00387885	3	4	Up-regulated
Sus_scrofa___PIM1	5.6621	2.54736	21.4942	7.76115e-05	0.00389217	3	4	Up-regulated
Sus_scrofa___MTHFD1L	2.85305	2.57753	22.299	7.76258e-05	0.00389217	3	4	Up-regulated
Sus_scrofa___ABHD12	0.909015	4.88459	22.2889	7.76437e-05	0.00389217	3	4	Up-regulated
Sus_scrofa___SLC1A5	4.81516	-1.12122	20.653	7.80144e-05	0.00389966	3	4	Up-regulated
Sus_scrofa___FRRS1L	2.1439	0.0642824	22.2878	7.84742e-05	0.00389966	3	4	Up-regulated
Sus_scrofa___ACSL5	2.8107	-0.736211	21.6452	7.8562e-05	0.00389966	3	4	Up-regulated
Sus_scrofa___LDLR	3.2136	0.968953	22.3183	7.86708e-05	0.00389966	3	4	Up-regulated
Sus_scrofa___ZP2	3.39731	-0.213556	22.0472	7.8882e-05	0.00389966	3	4	Up-regulated
Sus_scrofa___DNAH12	2.33154	3.41065	22.2313	7.89205e-05	0.00389966	3	4	Up-regulated
Sus_scrofa___PHLDA2	3.91941	2.38275	22.241	7.92364e-05	0.00390133	3	4	Up-regulated
Sus_scrofa___TRANK1	2.95567	5.50488	22.1949	7.96759e-05	0.00391573	3	4	Up-regulated
Sus_scrofa___CCN2	3.9833	5.34604	22.1889	7.98119e-05	0.00391573	3	4	Up-regulated
Sus_scrofa___MXD1	1.44847	5.10481	22.0906	8.19891e-05	0.00399423	3	4	Up-regulated
Sus_scrofa___SLC22A18	2.27537	1.75545	22.1044	8.24356e-05	0.00400892	3	4	Up-regulated
Sus_scrofa___ENSSSCG00000045347	5.1251	-1.72966	20.134	8.44105e-05	0.00408343	3	4	Up-regulated
Sus_scrofa___ENSSSCG00000003079	3.80746	4.01755	21.9441	8.54328e-05	0.00411849	3	4	Up-regulated
Sus_scrofa___CBARP	2.359	1.31205	21.9057	8.72274e-05	0.00417973	3	4	Up-regulated
Sus_scrofa___TECTB	2.40006	-0.0540229	21.6491	8.74385e-05	0.00417973	3	4	Up-regulated
Sus_scrofa___SRXN1	3.63366	2.86323	21.8678	8.76095e-05	0.00417973	3	4	Up-regulated
Sus_scrofa___CAVIN3	5.13354	-1.67998	20.1732	8.80823e-05	0.00419505	3	4	Up-regulated
Sus_scrofa___CHAC1	3.24523	-1.35596	19.7021	9.27555e-05	0.00439493	3	4	Up-regulated
Sus_scrofa___STIM1	2.37889	0.856703	21.6778	9.36636e-05	0.00443037	3	4	Up-regulated
Sus_scrofa___UCK2	2.03123	7.77667	21.5938	9.40722e-05	0.0044421	3	4	Up-regulated
Sus_scrofa___HFE	3.17111	-1.78299	18.9028	9.45941e-05	0.00445365	3	4	Up-regulated
Sus_scrofa___ENSSSCG00000007735	1.1252	6.53509	21.5536	9.51302e-05	0.00445547	3	4	Up-regulated
Sus_scrofa___DHX58	6.08587	2.72271	21.4648	9.53722e-05	0.00445547	3	4	Up-regulated
Sus_scrofa___TSPAN15	2.01525	7.31443	21.5337	9.56591e-05	0.00445547	3	4	Up-regulated
Sus_scrofa___BCL2L14	2.12885	-0.756191	21.0937	9.57925e-05	0.00445547	3	4	Up-regulated
Sus_scrofa___ENSSSCG00000013880	3.29386	4.19744	21.5317	9.58033e-05	0.00445547	3	4	Up-regulated
Sus_scrofa___ENSSSCG00000012950	3.0509	-0.968722	20.3286	9.73376e-05	0.00451161	3	4	Up-regulated
Sus_scrofa___AREG	5.16064	2.27774	21.4441	9.78667e-05	0.00452854	3	4	Up-regulated
Sus_scrofa___EGR1	6.59466	2.69429	21.2019	9.93221e-05	0.00456535	3	4	Up-regulated
Sus_scrofa___IL1RAP	2.92832	0.715797	21.4164	0.000100496	0.00460402	3	4	Up-regulated
Sus_scrofa___ITPR3	2.30645	-0.0481067	21.4063	0.000100908	0.00461527	3	4	Up-regulated
Sus_scrofa___CLDN6	3.92707	-0.141173	20.9035	0.000102152	0.00465919	3	4	Up-regulated
Sus_scrofa___ENSSSCG00000038506	1.29905	6.19734	21.2969	0.000102206	0.00465919	3	4	Up-regulated
Sus_scrofa___ETV4	4.35124	-1.82524	19.2058	0.000103581	0.00471413	3	4	Up-regulated
Sus_scrofa___ENSSSCG00000031798	3.07488	1.66174	21.215	0.000105448	0.00476772	3	4	Up-regulated
Sus_scrofa___USP18	5.31217	5.94894	21.1661	0.000106057	0.00478633	3	4	Up-regulated
Sus_scrofa___IFI44	7.48776	6.25038	21.0814	0.000108908	0.00488427	3	4	Up-regulated
Sus_scrofa___MTURN	2.97946	1.64634	21.091	0.000109916	0.0049215	3	4	Up-regulated
Sus_scrofa___EIF2AK2	4.81019	8.13973	21.006	0.000110922	0.00495111	3	4	Up-regulated
Sus_scrofa___JAKMIP3	4.38428	3.88963	21.0037	0.00011113	0.00495111	3	4	Up-regulated
Sus_scrofa___FMNL2	2.99394	3.0493	20.9988	0.000111293	0.00495111	3	4	Up-regulated
Sus_scrofa___FYCO1	1.19782	7.70394	20.9759	0.000111868	0.00495199	3	4	Up-regulated
Sus_scrofa___SRGN	3.16451	-0.408638	20.3179	0.00011201	0.00495199	3	4	Up-regulated
Sus_scrofa___ENSSSCG00000049426	2.94816	-1.07827	19.8236	0.000112054	0.00495199	3	4	Up-regulated
Sus_scrofa___ENSSSCG00000026976	2.37099	-1.88553	18.8641	0.000112821	0.00496323	3	4	Up-regulated
Sus_scrofa___PRR5	3.32672	0.726743	20.992	0.000113827	0.00499955	3	4	Up-regulated
Sus_scrofa___FKBP1B	2.01165	2.73332	20.9043	0.00011432	0.00501325	3	4	Up-regulated
Sus_scrofa___RUNX1	2.58345	0.673238	20.9092	0.000114791	0.00501642	3	4	Up-regulated
Sus_scrofa___ENSSSCG00000041010	3.58104	-1.4133	18.7641	0.000115534	0.00501642	3	4	Up-regulated
Sus_scrofa___SLC6A17	2.30195	0.630196	20.9282	0.000115731	0.00501642	3	4	Up-regulated
Sus_scrofa___ADORA3	2.52023	-0.441134	20.7094	0.000115832	0.00501642	3	4	Up-regulated
Sus_scrofa___OPALIN	2.41419	-0.192035	20.7325	0.000117457	0.00507046	3	4	Up-regulated
Sus_scrofa___MGAM	1.77935	1.33265	20.8163	0.000117964	0.00508438	3	4	Up-regulated
Sus_scrofa___COL16A1	3.09583	2.01278	20.773	0.000119333	0.00511948	3	4	Up-regulated
Sus_scrofa___ENSSSCG00000042730	3.1623	-0.875335	19.4132	0.000120713	0.0051639	3	4	Up-regulated
Sus_scrofa___SHISAL2A	1.45955	2.63287	20.7098	0.000120742	0.0051639	3	4	Up-regulated
Sus_scrofa___ENSSSCG00000033089	2.16618	2.61324	20.696	0.000121264	0.00517078	3	4	Up-regulated
Sus_scrofa___TPH2	1.54568	1.38977	20.715	0.000121276	0.00517078	3	4	Up-regulated
Sus_scrofa___ENSSSCG00000047500	1.84246	1.67721	20.7024	0.000121475	0.00517128	3	4	Up-regulated
Sus_scrofa___PMM1	1.68072	2.80756	20.6712	0.000122079	0.00518901	3	4	Up-regulated
Sus_scrofa___SERP2	1.35788	3.95176	20.6526	0.00012263	0.00519646	3	4	Up-regulated
Sus_scrofa___MAFF	4.71015	4.04066	20.632	0.000123585	0.00522677	3	4	Up-regulated
Sus_scrofa___UCHL1	3.5652	-0.971058	18.9003	0.000123902	0.00522677	3	4	Up-regulated
Sus_scrofa___ENSSSCG00000036556	1.52775	7.09074	20.6154	0.000123912	0.00522677	3	4	Up-regulated
Sus_scrofa___LRRC57	1.28772	2.80456	20.6012	0.00012452	0.00524441	3	4	Up-regulated
Sus_scrofa___CHST3	3.56671	-0.998384	19.4564	0.000125646	0.00525985	3	4	Up-regulated
Sus_scrofa___EBI3	2.44947	-0.710094	20.1318	0.00012756	0.00532385	3	4	Up-regulated
Sus_scrofa___NELL2	2.68052	5.17675	20.5056	0.000127863	0.00532844	3	4	Up-regulated
Sus_scrofa___CDC42BPG	2.10965	-1.83666	18.4595	0.000128682	0.00534981	3	4	Up-regulated
Sus_scrofa___KDR	4.34123	-1.52491	18.7808	0.000128762	0.00534981	3	4	Up-regulated
Sus_scrofa___MYEF2	1.9556	2.92885	20.435	0.000130562	0.00540028	3	4	Up-regulated
Sus_scrofa___AARS1	1.59142	5.85105	20.4267	0.000130773	0.00540093	3	4	Up-regulated
Sus_scrofa___GPR137B	1.77413	2.60685	20.3902	0.000132308	0.00543996	3	4	Up-regulated
Sus_scrofa___AKR1D1	1.91503	4.90459	20.3721	0.00013284	0.00545374	3	4	Up-regulated
Sus_scrofa___MASP2	2.91014	4.2098	20.3617	0.000133264	0.00546303	3	4	Up-regulated
Sus_scrofa___CHGA	2.97189	-1.35956	18.5837	0.000133465	0.0054632	3	4	Up-regulated
Sus_scrofa___TSPAN33	3.55242	-0.972698	19.2549	0.000135799	0.00553414	3	4	Up-regulated
Sus_scrofa___VEGFD	2.84106	0.60077	20.3561	0.000136642	0.00556033	3	4	Up-regulated
Sus_scrofa___IFFO2	1.88625	1.22989	20.2766	0.000138581	0.00562268	3	4	Up-regulated
Sus_scrofa___C3orf14	3.10246	-1.14221	18.6133	0.000138922	0.00562775	3	4	Up-regulated
Sus_scrofa___ENSSSCG00000049913	1.47664	2.69076	20.1823	0.0001404	0.00566328	3	4	Up-regulated
Sus_scrofa___XCR1	4.20912	-2.25252	18.1519	0.000140853	0.00567328	3	4	Up-regulated
Sus_scrofa___CDKL2	2.72566	0.98009	20.1792	0.00014221	0.00569561	3	4	Up-regulated
Sus_scrofa___MAST3	2.0345	0.690666	20.1886	0.000142231	0.00569561	3	4	Up-regulated
Sus_scrofa___CEBPD	8.119	1.69951	20.2983	0.000143266	0.00571915	3	4	Up-regulated
Sus_scrofa___DGKA	1.65646	1.58896	20.12	0.000143735	0.00572272	3	4	Up-regulated
Sus_scrofa___ENSSSCG00000051343	3.37313	-1.81261	17.74	0.000144235	0.00573439	3	4	Up-regulated
Sus_scrofa___C16orf89	2.38549	-0.00108869	20.0519	0.000144681	0.00573789	3	4	Up-regulated
Sus_scrofa___REL	1.47482	5.71912	20.0686	0.000144945	0.00573789	3	4	Up-regulated
Sus_scrofa___HIP1R	3.18557	-2.09115	17.7171	0.000145641	0.0057557	3	4	Up-regulated
Sus_scrofa___DIO1	2.09736	0.275127	19.9958	0.000148213	0.00584215	3	4	Up-regulated
Sus_scrofa___NOCT	1.35873	5.62971	19.932	0.000150785	0.00592787	3	4	Up-regulated
Sus_scrofa___MRC1	2.17016	0.773462	19.9841	0.000150816	0.00592787	3	4	Up-regulated
Sus_scrofa___GDF10	3.99202	-0.701941	18.6329	0.00015311	0.00599543	3	4	Up-regulated
Sus_scrofa___GPRC5A	2.43501	-0.313278	19.7782	0.000153184	0.00599543	3	4	Up-regulated
Sus_scrofa___ENSSSCG00000004670	2.84942	-0.875582	19.3025	0.000153554	0.00600139	3	4	Up-regulated
Sus_scrofa___SLC17A9	5.05318	-1.53947	18.1964	0.000153856	0.00600474	3	4	Up-regulated
Sus_scrofa___PRSS45P	3.14235	0.99146	19.9118	0.0001544	0.00601748	3	4	Up-regulated
Sus_scrofa___ENSSSCG00000037566	3.49229	-1.10775	18.2225	0.000158867	0.00611405	3	4	Up-regulated
Sus_scrofa___ENSSSCG00000045769	3.44401	3.27882	19.718	0.000161263	0.00618543	3	4	Up-regulated
Sus_scrofa___SEMA3D	2.54846	0.171913	19.7364	0.000161392	0.00618543	3	4	Up-regulated
Sus_scrofa___STOX2	2.64986	1.87398	19.695	0.00016249	0.00621891	3	4	Up-regulated
Sus_scrofa___TLE3	3.06494	3.54946	19.6726	0.000163147	0.00622816	3	4	Up-regulated
Sus_scrofa___IRF7	4.57432	1.89145	19.6892	0.000163643	0.00622912	3	4	Up-regulated
Sus_scrofa___HERC6	6.76434	6.67617	19.6453	0.00016398	0.00623282	3	4	Up-regulated
Sus_scrofa___MOV10	2.7498	3.72906	19.6207	0.000165162	0.00626912	3	4	Up-regulated
Sus_scrofa___LRATD1	4.64475	-1.27854	18.4957	0.000166047	0.00628548	3	4	Up-regulated
Sus_scrofa___ENSSSCG00000011859	1.83094	2.37898	19.5811	0.000167282	0.00632356	3	4	Up-regulated
Sus_scrofa___FAM180A	2.44169	2.65198	19.5762	0.000167599	0.0063269	3	4	Up-regulated
Sus_scrofa___ENSSSCG00000013717	1.84212	1.20493	19.5556	0.000169893	0.00638073	3	4	Up-regulated
Sus_scrofa___HSPA5	2.31488	4.66675	19.4112	0.000175517	0.00652787	3	4	Up-regulated
Sus_scrofa___GPR173	2.55917	-1.42571	18.0761	0.00017611	0.00654112	3	4	Up-regulated
Papio_anubis_ENSPANG00000037669	5.0598	-1.92827	18.7259	0.000176475	0.00654588	3	4	Up-regulated
Sus_scrofa___PCP2	1.80991	-0.125472	19.2996	0.000177434	0.00657264	3	4	Up-regulated
Sus_scrofa___LINGO1	1.66439	1.40828	19.3805	0.000178236	0.00658473	3	4	Up-regulated
Sus_scrofa___WWC1	2.62336	5.92625	19.3209	0.000180218	0.00663598	3	4	Up-regulated
Sus_scrofa___RFX5	1.90475	0.267201	19.2964	0.000180403	0.00663598	3	4	Up-regulated
Sus_scrofa___PML	3.35761	5.74528	19.3141	0.000180582	0.00663598	3	4	Up-regulated
Sus_scrofa___ENSSSCG00000017146	3.35625	6.76791	19.3032	0.000181155	0.0066482	3	4	Up-regulated
Sus_scrofa___ENSSSCG00000006525	3.59119	-1.96183	17.3661	0.000182153	0.00667598	3	4	Up-regulated
Sus_scrofa___ARHGAP6	2.65155	1.98018	19.2843	0.000182822	0.0066775	3	4	Up-regulated
Sus_scrofa___PKNOX2	2.04068	2.09536	19.2775	0.000182947	0.0066775	3	4	Up-regulated
Sus_scrofa___ENSSSCG00000007719	2.47004	0.579664	19.308	0.000183475	0.00667816	3	4	Up-regulated
Sus_scrofa___DOCK8	2.08063	1.07746	19.289	0.000183727	0.00667816	3	4	Up-regulated
Sus_scrofa___C9orf72	1.85242	4.62538	19.2523	0.000183902	0.00667816	3	4	Up-regulated
Sus_scrofa___SH3BGRL2	2.48515	0.108599	19.1684	0.000186133	0.00672089	3	4	Up-regulated
Sus_scrofa___DOCK9	1.67938	5.87449	19.211	0.000186136	0.00672089	3	4	Up-regulated
Sus_scrofa___AXL	3.21875	-0.724251	18.7353	0.000186924	0.00673485	3	4	Up-regulated
Sus_scrofa___FADS6	1.85891	-0.55269	19.0403	0.000187509	0.00674716	3	4	Up-regulated
Sus_scrofa___GPA33	2.29703	4.56679	19.1517	0.000189454	0.00680829	3	4	Up-regulated
Sus_scrofa___ARHGAP30	3.03332	-0.75509	18.6525	0.000191843	0.00687627	3	4	Up-regulated
Sus_scrofa___EMP1	6.25248	-0.026592	18.3641	0.000192872	0.00690423	3	4	Up-regulated
Sus_scrofa___CNP	1.60233	-0.17336	19.0454	0.00019494	0.00696746	3	4	Up-regulated
Sus_scrofa___MYO7B	2.16849	2.50558	19.0339	0.000196425	0.007003	3	4	Up-regulated
Sus_scrofa___ENSSSCG00000048171	5.46948	-2.81761	20.0323	0.000196644	0.007003	3	4	Up-regulated
Sus_scrofa___ITGB8	2.30572	7.76509	19.0145	0.000197261	0.00701594	3	4	Up-regulated
Sus_scrofa___CSRNP1	2.79177	1.90003	19.0229	0.000197824	0.00701792	3	4	Up-regulated
Sus_scrofa___CHMP4B	1.18527	6.46462	18.9971	0.000198281	0.00702514	3	4	Up-regulated
Sus_scrofa___ENSSSCG00000046656	1.77307	-0.927151	18.4476	0.000199283	0.0070479	3	4	Up-regulated
Sus_scrofa___MAP3K9	2.23491	-0.331488	18.8761	0.000200065	0.007054	3	4	Up-regulated
Sus_scrofa___SERPINB10	3.37313	-1.44945	17.4573	0.000200316	0.007054	3	4	Up-regulated
Sus_scrofa___BCL6	1.23322	4.77174	18.962	0.00020037	0.007054	3	4	Up-regulated
Sus_scrofa___NPR1	2.52115	-1.92918	17.0544	0.000200707	0.00705688	3	4	Up-regulated
Sus_scrofa___DDX25	2.69023	-0.37346	18.698	0.000201125	0.00706261	3	4	Up-regulated
Sus_scrofa___MTHFD2	1.88786	0.372986	19.0037	0.000202204	0.0070915	3	4	Up-regulated
Sus_scrofa___SEPTIN11	1.74401	5.50766	18.9218	0.000202762	0.00710205	3	4	Up-regulated
Sus_scrofa___IFI44L	4.90304	6.38426	18.904	0.000203854	0.00713126	3	4	Up-regulated
Sus_scrofa___ENSSSCG00000017285	2.42714	-1.42142	17.7652	0.00020608	0.0071883	3	4	Up-regulated
Sus_scrofa___IGF2BP3	1.12603	6.70496	18.8641	0.000206263	0.0071883	3	4	Up-regulated
Sus_scrofa___CHD3	1.67109	3.69129	18.8346	0.000208143	0.0072356	3	4	Up-regulated
Sus_scrofa___RASSF7	3.09054	-1.53758	17.0598	0.00021143	0.00732225	3	4	Up-regulated
Sus_scrofa___ENSSSCG00000038183	2.61982	-1.569	17.0476	0.000213157	0.00735136	3	4	Up-regulated
Sus_scrofa___S100A11	3.74796	0.466634	18.0454	0.000213865	0.00735136	3	4	Up-regulated
Sus_scrofa___DTX3L	4.65128	3.24567	18.7469	0.000215075	0.00738379	3	4	Up-regulated
Sus_scrofa___ENSSSCG00000041367	2.83007	1.82237	18.7043	0.000216724	0.00742198	3	4	Up-regulated
Sus_scrofa___ATP6V0D2	2.45721	-0.115694	18.6439	0.000218563	0.00744809	3	4	Up-regulated
Sus_scrofa___IL25	4.14533	-0.244053	17.7714	0.000219632	0.00747532	3	4	Up-regulated
Sus_scrofa___ID1	4.30622	-2.18641	16.691	0.00022098	0.00751195	3	4	Up-regulated
Sus_scrofa___ARL9	1.79045	1.1322	18.6247	0.000223507	0.00758853	3	4	Up-regulated
Sus_scrofa___NCKIPSD	1.95146	0.801931	18.6201	0.000224828	0.00761469	3	4	Up-regulated
Sus_scrofa___CD96	2.05178	-0.655008	18.3772	0.00022553	0.00762916	3	4	Up-regulated
Sus_scrofa___ENSSSCG00000034555	4.12239	-2.12371	17.5174	0.000226586	0.0076555	3	4	Up-regulated
Sus_scrofa___PABPC1	1.23106	5.65504	18.5394	0.000227259	0.00765956	3	4	Up-regulated
Sus_scrofa___FLNC	1.80637	8.15722	18.4845	0.000231033	0.00774288	3	4	Up-regulated
Sus_scrofa___MFAP2	4.33794	-2.42068	16.4399	0.00023195	0.00775271	3	4	Up-regulated
Sus_scrofa___LBR	2.5829	0.602645	18.5355	0.000232214	0.00775271	3	4	Up-regulated
Sus_scrofa___CDCP1	1.53845	4.40935	18.4671	0.000232265	0.00775271	3	4	Up-regulated
Sus_scrofa___ICAM1	4.12993	-0.481181	17.4953	0.000233556	0.00778643	3	4	Up-regulated
Sus_scrofa___RNPEP	1.63932	2.50716	18.4411	0.000234505	0.00780728	3	4	Up-regulated
Sus_scrofa___SDC3	3.50505	-1.24691	16.9892	0.000234969	0.00780728	3	4	Up-regulated
Sus_scrofa___ADAMTS8	3.59742	-1.43178	16.2281	0.000235436	0.00780743	3	4	Up-regulated
Sus_scrofa___UNC5D	1.51946	3.40959	18.4208	0.000235597	0.00780743	3	4	Up-regulated
Sus_scrofa___FJX1	3.19442	-0.354226	17.8759	0.000236798	0.00783783	3	4	Up-regulated
Sus_scrofa___ENSSSCG00000004404	2.03686	0.230298	18.4041	0.00023799	0.00786313	3	4	Up-regulated
Sus_scrofa___ABCC11	1.39801	0.729729	18.4059	0.000238522	0.00786668	3	4	Up-regulated
Sus_scrofa___SYT2	2.67414	0.439547	18.3917	0.000240036	0.0079072	3	4	Up-regulated
Sus_scrofa___VXN	2.38553	3.1319	18.3356	0.000241936	0.00793838	3	4	Up-regulated
Sus_scrofa___ENSSSCG00000046153	2.2178	5.3215	18.3168	0.000242994	0.00795427	3	4	Up-regulated
Sus_scrofa___HR	1.99912	2.30617	18.3253	0.000243197	0.00795427	3	4	Up-regulated
Sus_scrofa___CD4	2.29389	-0.811032	17.979	0.00024523	0.00800207	3	4	Up-regulated
Sus_scrofa___LDHC	1.67512	2.68157	18.2652	0.000247039	0.00805161	3	4	Up-regulated
Sus_scrofa___SARNP	1.47317	0.946247	18.2732	0.00024845	0.00808807	3	4	Up-regulated
Sus_scrofa___YBX2	2.2631	1.09682	18.2757	0.000249727	0.00812009	3	4	Up-regulated
Sus_scrofa___GJC1	2.22072	3.70109	18.2066	0.000251284	0.00815155	3	4	Up-regulated
Sus_scrofa___MAP2	2.32629	0.266719	18.1244	0.000260229	0.0083915	3	4	Up-regulated
Sus_scrofa___C3orf62	1.67934	2.65998	18.0769	0.000261533	0.00840548	3	4	Up-regulated
Sus_scrofa___PKDCC	1.23101	5.80858	18.072	0.000261653	0.00840548	3	4	Up-regulated
Sus_scrofa___RGL1	1.34201	5.72557	18.0683	0.000261945	0.00840548	3	4	Up-regulated
Sus_scrofa___ENSSSCG00000007578	1.65942	0.253973	18.0964	0.000262149	0.00840548	3	4	Up-regulated
Sus_scrofa___CHSY3	2.82498	1.31559	18.0717	0.000263759	0.0084154	3	4	Up-regulated
Sus_scrofa___POLR1G	1.79262	2.3187	18.0439	0.000264426	0.0084154	3	4	Up-regulated
Sus_scrofa___BCAT1	2.18729	-0.0362092	17.8357	0.000264892	0.0084154	3	4	Up-regulated
Sus_scrofa___ENSSSCG00000014351	4.4948	-0.731904	16.9081	0.000266094	0.00844391	3	4	Up-regulated
Sus_scrofa___MMRN2	3.09943	0.45739	17.8888	0.000266579	0.00844477	3	4	Up-regulated
Sus_scrofa___DNAH9	1.21438	2.77677	18.0085	0.000266947	0.00844477	3	4	Up-regulated
Sus_scrofa___ENSSSCG00000014996	3.0216	-1.38158	16.3936	0.000267129	0.00844477	3	4	Up-regulated
Sus_scrofa___ENSSSCG00000023771	2.26183	2.89614	17.985	0.000268937	0.00848548	3	4	Up-regulated
Sus_scrofa___F2	2.45321	2.20518	17.9862	0.000269829	0.00850392	3	4	Up-regulated
Sus_scrofa___CLDND1	1.0292	5.5852	17.9625	0.000270499	0.00851532	3	4	Up-regulated
Sus_scrofa___ENSSSCG00000036123	2.31359	1.67726	17.9562	0.00027236	0.00855178	3	4	Up-regulated
Sus_scrofa___EFS	3.0407	0.453938	17.8363	0.000272584	0.00855178	3	4	Up-regulated
Sus_scrofa___NSG1	2.20405	-0.632582	17.5714	0.00027336	0.00855774	3	4	Up-regulated
Sus_scrofa___PLAU	3.54841	-1.54424	16.3112	0.000274896	0.00857569	3	4	Up-regulated
Sus_scrofa___MYO1D	2.40674	3.60514	17.8941	0.000276266	0.00860875	3	4	Up-regulated
Sus_scrofa___ENSSSCG00000048841	3.28853	-1.73805	16.7193	0.000277356	0.00863298	3	4	Up-regulated
Sus_scrofa___FLRT3	3.04955	0.0991305	17.7169	0.000283264	0.00876757	3	4	Up-regulated
Sus_scrofa___NDUFA4L2	1.6708	0.0549514	17.8342	0.00028566	0.00881215	3	4	Up-regulated
Sus_scrofa___SPTLC2	1.37884	3.84682	17.7529	0.000288413	0.00886742	3	4	Up-regulated
Sus_scrofa___CD44	1.84933	7.17905	17.7295	0.000290423	0.00890943	3	4	Up-regulated
Sus_scrofa___RTN1	1.58957	1.71313	17.7239	0.000292164	0.00894616	3	4	Up-regulated
Sus_scrofa___ENSSSCG00000036363	3.00848	-0.729908	17.3605	0.000292787	0.00894616	3	4	Up-regulated
Sus_scrofa___SLC51A	1.92182	1.18368	17.6449	0.000293148	0.00894616	3	4	Up-regulated
Sus_scrofa___ENSSSCG00000050527	5.38155	-2.12807	16.8408	0.000293789	0.00894616	3	4	Up-regulated
Sus_scrofa___SPIDR	2.1237	6.5088	17.6909	0.000293884	0.00894616	3	4	Up-regulated
Sus_scrofa___SLC2A6	1.75532	-0.686632	17.3282	0.000294842	0.00896547	3	4	Up-regulated
Sus_scrofa___PLLP	2.02761	1.23563	17.6279	0.0003019	0.00913992	3	4	Up-regulated
Papio_anubis_U5-10	2.83749	-0.833372	16.5094	0.00030383	0.00916248	3	4	Up-regulated
Sus_scrofa___SDSL	2.53688	-1.60458	16.5324	0.00030397	0.00916248	3	4	Up-regulated
Sus_scrofa___FAM111B	2.74093	-1.02134	16.7329	0.000308645	0.00926304	3	4	Up-regulated
Sus_scrofa___EIF5A2	2.08115	0.386669	17.5817	0.000310253	0.00930119	3	4	Up-regulated
Sus_scrofa___ENSSSCG00000050094	2.15397	0.877449	17.5213	0.000312604	0.00935345	3	4	Up-regulated
Sus_scrofa___SOAT1	1.57088	2.89303	17.4916	0.000312672	0.00935345	3	4	Up-regulated
Sus_scrofa___PAX6	3.55062	-2.23634	15.5331	0.000313511	0.00936843	3	4	Up-regulated
Sus_scrofa___MARCHF10	1.89673	1.66578	17.4719	0.000315758	0.00940509	3	4	Up-regulated
Sus_scrofa___OSBPL10	2.04061	3.6836	17.4515	0.000316425	0.00941484	3	4	Up-regulated
Sus_scrofa___IRAK4	1.70179	2.99148	17.4427	0.000317373	0.00941706	3	4	Up-regulated
Sus_scrofa___MSR1	2.87913	-0.539522	17.1157	0.000317479	0.00941706	3	4	Up-regulated
Sus_scrofa___PPP1R18	3.69097	1.02265	17.4207	0.000317521	0.00941706	3	4	Up-regulated
Sus_scrofa___WNT6	1.71192	-0.875931	17.1529	0.000318668	0.00942468	3	4	Up-regulated
Sus_scrofa___TLR2	2.59782	-1.27391	16.6377	0.000318799	0.00942468	3	4	Up-regulated
Sus_scrofa___DAB2	2.53246	3.68117	17.417	0.000319809	0.00944445	3	4	Up-regulated
Sus_scrofa___SPATA6	1.74641	1.63229	17.4193	0.00032066	0.00945948	3	4	Up-regulated
Sus_scrofa___C3orf49	3.09531	0.973526	17.35	0.000321093	0.00946215	3	4	Up-regulated
Sus_scrofa___RCAN1	1.77078	8.44461	17.3945	0.000321917	0.00946872	3	4	Up-regulated
Sus_scrofa___CD247	1.56461	2.45927	17.3832	0.000323393	0.00948952	3	4	Up-regulated
Sus_scrofa___FARP1	0.986297	6.82934	17.342	0.000327181	0.00957023	3	4	Up-regulated
Sus_scrofa___ENSSSCG00000002653	2.00335	1.01584	17.3608	0.000328094	0.00958678	3	4	Up-regulated
Sus_scrofa___RFX3	1.22766	5.25591	17.2413	0.000337557	0.00977044	3	4	Up-regulated
Sus_scrofa___SUSD1	1.25365	4.33456	17.1987	0.000342061	0.00986983	3	4	Up-regulated
Sus_scrofa___KCTD17	3.83289	-2.45887	15.4525	0.000343364	0.00989538	3	4	Up-regulated
Sus_scrofa___CFAP251	2.30666	2.65664	17.1817	0.000344172	0.00989538	3	4	Up-regulated
Sus_scrofa___CGAS	3.26267	-2.09437	15.0367	0.000344265	0.00989538	3	4	Up-regulated
Sus_scrofa___AQP11	1.53388	1.5622	17.0504	0.000359742	0.0102548	3	4	Up-regulated
Sus_scrofa___CCDC68	3.43587	-1.5342	15.7609	0.000362417	0.0103106	3	4	Up-regulated
Sus_scrofa___ENSSSCG00000004547	1.75738	1.36043	16.9953	0.000366533	0.0103674	3	4	Up-regulated
Sus_scrofa___TIMP1	6.04812	-0.841288	16.4265	0.000367093	0.0103674	3	4	Up-regulated
Sus_scrofa___SHISA4	2.3278	1.83478	16.9775	0.000367718	0.0103674	3	4	Up-regulated
Sus_scrofa___SCG5	3.10598	1.08353	16.9321	0.000368296	0.0103674	3	4	Up-regulated
Sus_scrofa___ADGRG6	2.47164	4.84665	16.9424	0.00037047	0.0103968	3	4	Up-regulated
Sus_scrofa___ENSSSCG00000039961	3.25045	0.395126	16.3791	0.000373127	0.0104374	3	4	Up-regulated
Sus_scrofa___ACOT7	1.4703	1.04126	16.9436	0.000373424	0.0104374	3	4	Up-regulated
Sus_scrofa___CCND3	2.6983	4.31252	16.9079	0.000374504	0.01045	3	4	Up-regulated
Sus_scrofa___IL5RA	6.3317	-0.204359	17.0611	0.000374832	0.01045	3	4	Up-regulated
Sus_scrofa___CEP152	1.3541	3.41764	16.9004	0.00037543	0.01045	3	4	Up-regulated
Papio_anubis_U12-1	3.71939	-2.24479	14.9745	0.000375734	0.01045	3	4	Up-regulated
Sus_scrofa___CD244	2.97973	-1.39913	15.9136	0.000376094	0.01045	3	4	Up-regulated
Sus_scrofa___ENSSSCG00000026233	1.23935	3.21818	16.895	0.000376139	0.01045	3	4	Up-regulated
Sus_scrofa___ENSSSCG00000047417	3.20729	-2.06746	15.4192	0.000377987	0.0104908	3	4	Up-regulated
Sus_scrofa___FAM83B	2.79512	0.308791	16.8228	0.000380488	0.0105496	3	4	Up-regulated
Sus_scrofa___TECPR1	2.05649	4.151	16.8284	0.000383946	0.0106135	3	4	Up-regulated
Sus_scrofa___XBP1	1.28677	3.34532	16.8121	0.000385977	0.0106484	3	4	Up-regulated
Sus_scrofa___ENSSSCG00000001456	2.43646	-0.48058	16.2903	0.000389213	0.010727	3	4	Up-regulated
Sus_scrofa___MCF2	1.76392	0.528698	16.7981	0.000393368	0.0108092	3	4	Up-regulated
Sus_scrofa___IRF3	1.00502	4.07016	16.734	0.000395484	0.0108566	3	4	Up-regulated
Sus_scrofa___ENSSSCG00000039731	1.81703	3.1594	16.7108	0.000398542	0.0108973	3	4	Up-regulated
Sus_scrofa___GAN	1.39245	6.38141	16.6978	0.000399953	0.0109039	3	4	Up-regulated
Sus_scrofa___TBC1D10A	1.14845	2.58871	16.6975	0.000400362	0.0109039	3	4	Up-regulated
Sus_scrofa___FCER2	1.6772	0.17771	16.7079	0.000401112	0.0109136	3	4	Up-regulated
Sus_scrofa___IRF1	2.3959	1.28916	16.6338	0.000412525	0.0111352	3	4	Up-regulated
Sus_scrofa___CPNE8	1.56988	2.87737	16.5996	0.000412877	0.0111352	3	4	Up-regulated
Sus_scrofa___SGTB	1.35465	2.73019	16.5649	0.000417342	0.0112038	3	4	Up-regulated
Sus_scrofa___CCNB1IP1	0.92157	4.78505	16.522	0.000422752	0.0113037	3	4	Up-regulated
Sus_scrofa___SHKBP1	2.66599	-0.184468	16.4883	0.000422802	0.0113037	3	4	Up-regulated
Sus_scrofa___TNNT3	1.35959	3.29568	16.4835	0.000428073	0.0114116	3	4	Up-regulated
Sus_scrofa___ENSSSCG00000003845	3.31467	4.12797	16.4684	0.000430163	0.0114563	3	4	Up-regulated
Sus_scrofa___SATB2	2.10324	1.17541	16.454	0.000435032	0.0115275	3	4	Up-regulated
Sus_scrofa___EPSTI1	5.14847	6.31376	16.4299	0.000435284	0.0115275	3	4	Up-regulated
Sus_scrofa___CPA1	1.87094	1.43589	16.4337	0.000437095	0.0115524	3	4	Up-regulated
Sus_scrofa___ENSSSCG00000017103	2.34666	4.49441	16.4155	0.000437269	0.0115524	3	4	Up-regulated
Sus_scrofa___CCSER1	2.73675	5.36557	16.4084	0.00043822	0.0115524	3	4	Up-regulated
Sus_scrofa___LLGL2	2.6633	-0.24192	16.3261	0.000438311	0.0115524	3	4	Up-regulated
Sus_scrofa___ENSSSCG00000014186	1.47058	1.42004	16.3777	0.000444841	0.0116339	3	4	Up-regulated
Sus_scrofa___DCST2	3.07443	-1.87697	14.9159	0.000445243	0.0116339	3	4	Up-regulated
Sus_scrofa___SLC24A5	3.05513	0.853591	16.3895	0.000448292	0.0117025	3	4	Up-regulated
Sus_scrofa___KANK3	2.52498	-1.26945	15.5084	0.000453034	0.011777	3	4	Up-regulated
Sus_scrofa___ZC3H12A	1.71835	0.0432828	16.3445	0.000453455	0.011777	3	4	Up-regulated
Sus_scrofa___TRIM21	3.02771	3.73978	16.2946	0.000454548	0.011777	3	4	Up-regulated
Sus_scrofa___ENSSSCG00000028531	2.66851	-1.62498	15.0909	0.000454551	0.011777	3	4	Up-regulated
Sus_scrofa___ENSSSCG00000034866	2.73636	-1.95881	14.6712	0.000456316	0.011802	3	4	Up-regulated
Sus_scrofa___PLXDC2	4.24957	2.35414	16.2701	0.000456367	0.011802	3	4	Up-regulated
Sus_scrofa___PTGS2	5.46707	-2.25971	15.4296	0.000459805	0.011847	3	4	Up-regulated
Sus_scrofa___PCDH17	3.27947	-1.08484	15.3095	0.000459821	0.011847	3	4	Up-regulated
Sus_scrofa___GRM3	2.57509	2.51235	16.2609	0.000460301	0.0118484	3	4	Up-regulated
Sus_scrofa___ENSSSCG00000043963	1.85047	2.93479	16.1939	0.000469406	0.0120157	3	4	Up-regulated
Sus_scrofa___DNAJB13	1.31118	1.50498	16.1989	0.000470844	0.0120191	3	4	Up-regulated
Sus_scrofa___TM4SF20	3.23723	-0.905124	15.5608	0.000473526	0.0120431	3	4	Up-regulated
Sus_scrofa___H2AC12	4.73536	-2.21419	15.0372	0.000475194	0.0120735	3	4	Up-regulated
Sus_scrofa___KCNN3	1.12997	2.76255	16.1502	0.000476027	0.0120735	3	4	Up-regulated
Sus_scrofa___ENSSSCG00000033720	1.75415	1.96595	16.143	0.00047973	0.012134	3	4	Up-regulated
Sus_scrofa___EML6	1.43768	2.04421	16.1154	0.000482181	0.0121737	3	4	Up-regulated
Sus_scrofa___MRAP2	1.76599	0.121447	16.1485	0.000483301	0.0121909	3	4	Up-regulated
Sus_scrofa___DENND2D	2.83106	-1.07526	15.3415	0.000485131	0.0122259	3	4	Up-regulated
Sus_scrofa___RNF220	0.974429	3.53816	16.0816	0.000486354	0.0122456	3	4	Up-regulated
Sus_scrofa___FGF5	2.14727	1.48197	16.0872	0.000488167	0.0122787	3	4	Up-regulated
Sus_scrofa___H2BC11	4.06137	-2.24061	15.4715	0.000488556	0.0122787	3	4	Up-regulated
Sus_scrofa___GALNT5	2.47459	0.735389	16.0631	0.000495063	0.012382	3	4	Up-regulated
Sus_scrofa___ACTB	1.11937	7.34694	16.0238	0.000495312	0.012382	3	4	Up-regulated
Sus_scrofa___MASTL	1.76875	0.211791	16.0524	0.000495361	0.012382	3	4	Up-regulated
Sus_scrofa___OTOGL	1.78345	1.21554	16.0326	0.000497186	0.012391	3	4	Up-regulated
Sus_scrofa___ENSSSCG00000024268	2.49054	0.106177	16.0403	0.000497706	0.012391	3	4	Up-regulated
Sus_scrofa___PLCG2	2.19586	1.93468	16.011	0.000499826	0.0124265	3	4	Up-regulated
Sus_scrofa___SORCS1	1.35269	2.3795	15.9978	0.000500403	0.0124297	3	4	Up-regulated
Sus_scrofa___LGALS3	2.43883	-0.927948	15.5895	0.000504873	0.0125182	3	4	Up-regulated
Sus_scrofa___TXNRD1	1.09929	6.66294	15.949	0.000507338	0.0125568	3	4	Up-regulated
Sus_scrofa___XIAP	1.03441	8.48899	15.8786	0.000518934	0.0128095	3	4	Up-regulated
Sus_scrofa___ARRDC5	1.66426	-0.720023	15.4764	0.000521559	0.0128628	3	4	Up-regulated
Sus_scrofa___ENSSSCG00000035037	2.98448	5.41514	15.8531	0.000523245	0.0128929	3	4	Up-regulated
Sus_scrofa___ITGAV	1.31257	8.87611	15.8445	0.000524661	0.012905	3	4	Up-regulated
Sus_scrofa___STC1	5.09935	-2.51516	14.5562	0.00052467	0.012905	3	4	Up-regulated
Sus_scrofa___FBXO4	0.79619	5.8688	15.8377	0.000525819	0.0129218	3	4	Up-regulated
Sus_scrofa___ANKDD1A	2.30555	0.572319	15.8451	0.000527788	0.0129472	3	4	Up-regulated
Sus_scrofa___ELAVL3	1.53173	-0.262062	15.8415	0.000530608	0.0129922	3	4	Up-regulated
Sus_scrofa___ZNF792	2.50667	0.666289	15.8524	0.000531049	0.0129922	3	4	Up-regulated
Sus_scrofa___SYCP2	1.86004	6.9806	15.7898	0.000533981	0.0130413	3	4	Up-regulated
Sus_scrofa___ENSSSCG00000043127	2.77843	-0.663768	15.2397	0.00054141	0.0131878	3	4	Up-regulated
Sus_scrofa___CD109	1.33623	3.35286	15.7434	0.000542227	0.0131961	3	4	Up-regulated
Sus_scrofa___ENSSSCG00000002891	2.90185	-2.23596	13.9336	0.000544938	0.0132433	3	4	Up-regulated
Sus_scrofa___ENSSSCG00000017164	2.49061	5.76539	15.7152	0.000547006	0.0132774	3	4	Up-regulated
Sus_scrofa___UNC5A	1.59152	-0.561131	15.4189	0.000548914	0.0132939	3	4	Up-regulated
Sus_scrofa___ARAP3	3.72922	-1.6355	14.2999	0.0005506	0.013315	3	4	Up-regulated
Sus_scrofa___FHL3	4.25715	-2.1488	14.4523	0.000550962	0.013315	3	4	Up-regulated
Sus_scrofa___SLC36A4	1.13327	5.33613	15.6757	0.000554024	0.0133657	3	4	Up-regulated
Sus_scrofa___GLP1R	2.03813	2.28564	15.6655	0.000558052	0.0134394	3	4	Up-regulated
Sus_scrofa___SRF	1.2805	4.5703	15.6479	0.00055907	0.0134398	3	4	Up-regulated
Sus_scrofa___ETNK2	1.86159	-0.276347	15.5113	0.000559528	0.0134398	3	4	Up-regulated
Sus_scrofa___ARL4C	3.21258	0.279698	15.5951	0.000560723	0.0134438	3	4	Up-regulated
Sus_scrofa___ABCG1	3.24371	-0.207494	15.2942	0.000563366	0.0134852	3	4	Up-regulated
Sus_scrofa___TGM1	2.8237	-1.10922	14.9174	0.000565955	0.0135355	3	4	Up-regulated
Sus_scrofa___ZNF18	1.06948	3.33295	15.6005	0.000567817	0.0135449	3	4	Up-regulated
Sus_scrofa___ENSSSCG00000040586	2.50697	1.44768	15.6009	0.000571312	0.0135995	3	4	Up-regulated
Sus_scrofa___STXBP1	1.24481	3.21096	15.5802	0.00057158	0.0135995	3	4	Up-regulated
Sus_scrofa___BTG3	2.62735	1.78322	15.5724	0.000575734	0.0136748	3	4	Up-regulated
Sus_scrofa___NETO2	1.80943	2.44897	15.5265	0.000582423	0.0137772	3	4	Up-regulated
Sus_scrofa___HOMEZ	1.35628	1.41762	15.5347	0.000582537	0.0137772	3	4	Up-regulated
Sus_scrofa___ZC3HAV1	3.03713	5.42478	15.51	0.000584611	0.0137909	3	4	Up-regulated
Sus_scrofa___ABHD5	2.06005	5.14371	15.5057	0.000585413	0.0137948	3	4	Up-regulated
Sus_scrofa___CHST7	2.18126	0.461867	15.498	0.000592293	0.0139247	3	4	Up-regulated
Sus_scrofa___ANXA5	1.5041	5.36019	15.456	0.000594936	0.0139571	3	4	Up-regulated
Sus_scrofa___ENSSSCG00000048811	2.0811	-1.56807	14.5655	0.000595186	0.0139571	3	4	Up-regulated
Sus_scrofa___FAM234B	0.88704	3.91775	15.4523	0.000595705	0.0139574	3	4	Up-regulated
Sus_scrofa___ENSSSCG00000040779	3.30509	0.634796	15.4118	0.000605569	0.0141766	3	4	Up-regulated
Sus_scrofa___CD180	3.00329	-0.633064	14.9362	0.000608566	0.0142115	3	4	Up-regulated
Sus_scrofa___TJP3	1.68314	1.28417	15.3986	0.000608601	0.0142115	3	4	Up-regulated
Sus_scrofa___CARMIL1	2.58684	1.69155	15.3915	0.000610973	0.0142428	3	4	Up-regulated
Sus_scrofa___ENSSSCG00000010370	3.70179	-1.44814	13.9232	0.000614096	0.0142915	3	4	Up-regulated
Sus_scrofa___ENSSSCG00000045272	2.90255	-1.98359	14.0516	0.000617332	0.0143427	3	4	Up-regulated
Sus_scrofa___ENSSSCG00000039871	3.32644	-1.78074	14.3491	0.000618643	0.0143611	3	4	Up-regulated
Sus_scrofa___KCNAB1	1.69617	4.7358	15.3284	0.000620214	0.0143855	3	4	Up-regulated
Sus_scrofa___SEC22C	1.01356	5.20701	15.3226	0.000621358	0.0144	3	4	Up-regulated
Sus_scrofa___ENSSSCG00000044138	3.46345	0.104054	14.8055	0.000627714	0.0145351	3	4	Up-regulated
Sus_scrofa___MYC	2.50963	2.40108	15.2731	0.000632416	0.014583	3	4	Up-regulated
Sus_scrofa___MYO1A	2.26191	-1.3925	14.343	0.0006379	0.0146972	3	4	Up-regulated
Sus_scrofa___ARL5B	1.31279	4.36585	15.2392	0.000638581	0.0147006	3	4	Up-regulated
Sus_scrofa___PDCL3	0.893686	4.62714	15.2354	0.000639357	0.0147063	3	4	Up-regulated
Sus_scrofa___PRKCD	2.05465	0.59002	15.2772	0.000640153	0.0147124	3	4	Up-regulated
Sus_scrofa___MAP2K3	1.37511	4.92739	15.223	0.000641939	0.0147412	3	4	Up-regulated
Sus_scrofa___ENSSSCG00000040973	1.14194	2.81342	15.2099	0.000644996	0.0147624	3	4	Up-regulated
Sus_scrofa___ENSSSCG00000028092	3.02761	1.05148	15.2286	0.000648775	0.0148127	3	4	Up-regulated
Sus_scrofa___LHFPL4	1.61744	0.568415	15.2147	0.00064928	0.0148127	3	4	Up-regulated
Sus_scrofa___MYH6	3.05696	9.49705	15.1806	0.000650893	0.014836	3	4	Up-regulated
Sus_scrofa___RHBDD1	1.11989	5.18198	15.1702	0.000653133	0.0148625	3	4	Up-regulated
Sus_scrofa___ADAM33	3.50315	1.29962	15.1863	0.000655978	0.0148944	3	4	Up-regulated
Sus_scrofa___C8orf89	2.23039	0.554209	15.171	0.000661134	0.0149341	3	4	Up-regulated
Sus_scrofa___CLIP4	1.98075	0.78378	15.1136	0.00067163	0.015099	3	4	Up-regulated
Sus_scrofa___PYGO1	1.53481	2.1629	15.0893	0.000671708	0.015099	3	4	Up-regulated
Sus_scrofa___TREX1	2.3359	0.669829	15.1115	0.000674012	0.0151385	3	4	Up-regulated
Sus_scrofa___FAM83G	2.04253	3.29986	15.0669	0.000675897	0.0151685	3	4	Up-regulated
Sus_scrofa___ENSSSCG00000032896	1.51999	0.576131	15.0722	0.000679994	0.0152455	3	4	Up-regulated
Sus_scrofa___LGALS1	3.35892	1.27653	14.756	0.00068064	0.0152455	3	4	Up-regulated
Sus_scrofa___TOX	2.28695	1.86617	15.0498	0.000681949	0.0152548	3	4	Up-regulated
Sus_scrofa___LMNTD1	1.92697	10.351	15.0199	0.000686198	0.0153251	3	4	Up-regulated
Sus_scrofa___CCDC38	2.01423	0.97082	14.9893	0.000694607	0.0154532	3	4	Up-regulated
Sus_scrofa___MORC3	1.27264	5.77947	14.9783	0.00069567	0.0154532	3	4	Up-regulated
Sus_scrofa___TKFC	1.6552	2.41013	14.9804	0.000695842	0.0154532	3	4	Up-regulated
Sus_scrofa___MDH1B	2.01411	0.297192	14.9576	0.000700796	0.0155258	3	4	Up-regulated
Sus_scrofa___KLHL29	3.14686	3.19415	14.9497	0.000702789	0.0155271	3	4	Up-regulated
Sus_scrofa___CCL2	5.13117	-1.37836	14.0079	0.000703099	0.0155271	3	4	Up-regulated
Sus_scrofa___TMEM40	2.20068	1.63742	14.9204	0.000712945	0.0156695	3	4	Up-regulated
Sus_scrofa___MYOF	2.1448	0.46266	14.8555	0.000717376	0.0157419	3	4	Up-regulated
Sus_scrofa___MAD2L2	2.37466	0.282869	14.9013	0.000722861	0.0158497	3	4	Up-regulated
Sus_scrofa___GRK6	1.11555	3.97256	14.8416	0.000727878	0.015947	3	4	Up-regulated
Sus_scrofa___SEC23B	0.999343	4.70937	14.8073	0.000736138	0.0160771	3	4	Up-regulated
Sus_scrofa___ENSSSCG00000016548	2.12097	2.97578	14.7957	0.000739276	0.0161329	3	4	Up-regulated
Sus_scrofa___IL15	3.55898	2.73478	14.8024	0.000740723	0.0161517	3	4	Up-regulated
Sus_scrofa___HSD17B7	2.22248	0.639247	14.8148	0.000744185	0.0161802	3	4	Up-regulated
Sus_scrofa___TESK2	1.2254	3.35336	14.7475	0.00075116	0.0162767	3	4	Up-regulated
Sus_scrofa___STAT1	3.06249	7.48051	14.7392	0.000752922	0.0162791	3	4	Up-regulated
Sus_scrofa___GUCY1B1	3.34133	0.725646	14.5744	0.000758213	0.0163538	3	4	Up-regulated
Sus_scrofa___NPAS3	1.55424	6.64447	14.7179	0.000758263	0.0163538	3	4	Up-regulated
Sus_scrofa___SHISA5	2.33201	2.36021	14.708	0.000762816	0.016394	3	4	Up-regulated
Sus_scrofa___PRKCZ	1.49906	2.19384	14.7036	0.000763088	0.016394	3	4	Up-regulated
Sus_scrofa___ENSSSCG00000036469	2.10355	0.0469566	14.649	0.000770343	0.0165242	3	4	Up-regulated
Sus_scrofa___PPP1R10	1.18489	5.72028	14.6594	0.000773142	0.0165585	3	4	Up-regulated
Sus_scrofa___GRIA2	1.76725	0.0183213	14.5747	0.000773773	0.0165592	3	4	Up-regulated
Sus_scrofa___ENSSSCG00000008686	5.10209	-2.77388	13.775	0.000776284	0.0165873	3	4	Up-regulated
Sus_scrofa___RIT1	1.44157	2.12006	14.6431	0.000778579	0.0166235	3	4	Up-regulated
Sus_scrofa___TNXB	3.30222	1.7197	14.5857	0.000797357	0.016907	3	4	Up-regulated
Sus_scrofa___RANBP6	1.18878	6.34145	14.5278	0.00080782	0.0170505	3	4	Up-regulated
Sus_scrofa___LRRC38	2.30513	-1.43047	13.8731	0.000809585	0.0170747	3	4	Up-regulated
Sus_scrofa___CEP170B	1.56912	1.40363	14.5283	0.000811338	0.0170987	3	4	Up-regulated
Sus_scrofa___TMEM204	2.8451	-1.7908	13.6109	0.000816088	0.0171785	3	4	Up-regulated
Sus_scrofa___SERPINB8	1.06986	3.0621	14.4974	0.000816368	0.0171785	3	4	Up-regulated
Sus_scrofa___BCL3	1.26847	3.07506	14.4872	0.000819243	0.0172113	3	4	Up-regulated
Sus_scrofa___ENSSSCG00000039506	2.83008	-1.57969	13.5272	0.000821038	0.0172113	3	4	Up-regulated
Sus_scrofa___ACKR3	5.08382	2.45824	14.375	0.000822168	0.0172192	3	4	Up-regulated
Sus_scrofa___SMIM2	3.52306	4.71873	14.4747	0.00082266	0.0172192	3	4	Up-regulated
Sus_scrofa___CLIC2	3.87939	-1.05638	13.596	0.000827787	0.0172728	3	4	Up-regulated
Sus_scrofa___TMEM150C	2.1991	0.18038	14.4479	0.000828672	0.0172728	3	4	Up-regulated
Sus_scrofa___CRYM	3.0063	-2.00773	13.3204	0.000828799	0.0172728	3	4	Up-regulated
Sus_scrofa___MATN1	2.76919	-1.77498	13.2382	0.000829136	0.0172728	3	4	Up-regulated
Sus_scrofa___GSTA1	3.34418	0.984689	14.3743	0.000830253	0.0172728	3	4	Up-regulated
Sus_scrofa___MYO7A	1.84373	3.43874	14.4451	0.000830839	0.0172728	3	4	Up-regulated
Sus_scrofa___LRRC55	2.02173	-0.219348	14.4057	0.000833979	0.017306	3	4	Up-regulated
Sus_scrofa___ENSSSCG00000044997	2.28531	0.660975	14.4386	0.000835072	0.0173088	3	4	Up-regulated
Sus_scrofa___CYBRD1	2.69866	1.29782	14.4511	0.000836366	0.0173227	3	4	Up-regulated
Sus_scrofa___AMOT	2.93572	-0.831528	14.0793	0.000837542	0.017334	3	4	Up-regulated
Sus_scrofa___LNX1	1.4594	1.41508	14.4229	0.00084009	0.0173702	3	4	Up-regulated
Sus_scrofa___SEMA5B	1.52698	0.98438	14.4285	0.00084102	0.0173702	3	4	Up-regulated
Sus_scrofa___ENSSSCG00000038144	1.98703	8.36188	14.4068	0.00084117	0.0173702	3	4	Up-regulated
Sus_scrofa___STYK1	2.76783	-1.42827	13.5667	0.000843311	0.0173755	3	4	Up-regulated
Sus_scrofa___ENSSSCG00000015795	1.9464	2.57666	14.3935	0.000845962	0.0174042	3	4	Up-regulated
Sus_scrofa___CDHR4	4.53011	-2.59703	15.7875	0.000851651	0.0174952	3	4	Up-regulated
Sus_scrofa___ENSSSCG00000001394	2.59916	-2.03257	12.9393	0.000854472	0.0175301	3	4	Up-regulated
Sus_scrofa___SCRG1	1.92844	2.94114	14.3604	0.000855024	0.0175301	3	4	Up-regulated
Sus_scrofa___ENSSSCG00000049923	2.60944	-1.2897	13.6001	0.000855883	0.0175301	3	4	Up-regulated
Sus_scrofa___RSPO2	1.6814	1.22008	14.3544	0.000861763	0.0176114	3	4	Up-regulated
Sus_scrofa___TLR6	3.71046	-1.82608	13.4012	0.000865268	0.01767	3	4	Up-regulated
Sus_scrofa___SAMD11	3.14452	-1.38972	13.4642	0.000868336	0.0176935	3	4	Up-regulated
Sus_scrofa___AGXT2	2.16794	0.172061	14.2587	0.000870105	0.0177165	3	4	Up-regulated
Sus_scrofa___CREB3L4	1.62444	0.226967	14.244	0.00087228	0.0177335	3	4	Up-regulated
Sus_scrofa___NGF	3.87954	-1.93408	13.2772	0.000873485	0.0177335	3	4	Up-regulated
Sus_scrofa___RGS10	2.99738	-2.34839	12.9486	0.000873989	0.0177335	3	4	Up-regulated
Sus_scrofa___GATA5	3.80423	-2.38698	13.0221	0.000874144	0.0177335	3	4	Up-regulated
Sus_scrofa___GTPBP2	1.28475	5.07998	14.2899	0.000874878	0.0177354	3	4	Up-regulated
Sus_scrofa___KIT	2.39798	0.1202	14.2771	0.000877141	0.0177682	3	4	Up-regulated
Sus_scrofa___NPFFR1	2.36407	-0.0288921	14.2745	0.000878293	0.0177785	3	4	Up-regulated
Sus_scrofa___ENSSSCG00000023436	1.77321	0.838801	14.2885	0.000882626	0.0178401	3	4	Up-regulated
Sus_scrofa___CADPS2	2.60346	3.64917	14.2531	0.000886102	0.0178843	3	4	Up-regulated
Sus_scrofa___ARPC4	0.73668	4.25805	14.2377	0.000890394	0.0179186	3	4	Up-regulated
Sus_scrofa___BTG1	1.38123	5.60609	14.2053	0.000900127	0.0180488	3	4	Up-regulated
Sus_scrofa___HPGD	3.27261	1.55864	14.2061	0.000906432	0.018149	3	4	Up-regulated
Sus_scrofa___ENSSSCG00000017643	2.99594	-1.49204	13.2507	0.000912708	0.0182482	3	4	Up-regulated
Sus_scrofa___PRDX4	0.918831	4.52926	14.1611	0.000913685	0.0182528	3	4	Up-regulated
Sus_scrofa___PCYT1B	1.33064	2.53237	14.1463	0.000919009	0.0183213	3	4	Up-regulated
Sus_scrofa___TMEM102	2.24656	-2.00732	12.8945	0.000921319	0.0183387	3	4	Up-regulated
Sus_scrofa___ENSSSCG00000029253	3.02874	-1.28117	13.3016	0.000921871	0.0183387	3	4	Up-regulated
Sus_scrofa___SYT9	1.5994	1.97111	14.1339	0.000923651	0.0183609	3	4	Up-regulated
Sus_scrofa___ENSSSCG00000009625	2.50199	-1.50656	13.3929	0.000926643	0.0184045	3	4	Up-regulated
Sus_scrofa___FOXP3	1.59688	-0.214051	14.1343	0.000927174	0.0184045	3	4	Up-regulated
Sus_scrofa___EPHA1	1.68612	0.539152	13.9914	0.000932916	0.0184897	3	4	Up-regulated
Sus_scrofa___BIN1	2.02938	2.14449	14.1022	0.000933473	0.0184897	3	4	Up-regulated
Sus_scrofa___MAGI2	1.5774	5.22434	14.0731	0.000941228	0.01863	3	4	Up-regulated
Sus_scrofa___ENSSSCG00000045136	2.81328	-1.54032	13.1291	0.000950504	0.0187733	3	4	Up-regulated
Sus_scrofa___DEGS1	0.907959	3.80573	14.0324	0.000954392	0.0188098	3	4	Up-regulated
Sus_scrofa___MYD88	1.64217	-0.221146	14.0023	0.000955965	0.0188274	3	4	Up-regulated
Sus_scrofa___CD84	2.16205	-0.946601	13.8089	0.000958663	0.0188671	3	4	Up-regulated
Sus_scrofa___ENSSSCG00000006025	2.37443	-1.48128	13.3419	0.000962385	0.0189135	3	4	Up-regulated
Sus_scrofa___MDFI	1.86418	-0.932325	13.7837	0.000966774	0.0189862	3	4	Up-regulated
Sus_scrofa___ENSSSCG00000044574	5.28229	2.45427	13.864	0.000969271	0.0190218	3	4	Up-regulated
Sus_scrofa___FCER1G	1.9673	-0.138045	13.9791	0.000980232	0.0191689	3	4	Up-regulated
Sus_scrofa___LRRC69	1.37968	1.07053	13.9673	0.000983246	0.0192102	3	4	Up-regulated
Sus_scrofa___DNAJC22	1.30301	0.885047	13.9635	0.00098373	0.0192102	3	4	Up-regulated
Sus_scrofa___ENSSSCG00000013173	2.6271	-1.40963	13.249	0.000986797	0.0192429	3	4	Up-regulated
Sus_scrofa___FGFR3	3.51801	-2.00093	12.6156	0.000988515	0.0192618	3	4	Up-regulated
Sus_scrofa___ADAM32	1.48672	1.39597	13.9386	0.000989157	0.0192618	3	4	Up-regulated
Sus_scrofa___PHF21B	1.8326	3.90444	13.9032	0.000997184	0.01935	3	4	Up-regulated
Sus_scrofa___ENSSSCG00000038825	1.68945	-1.02543	13.6401	0.00100383	0.0194379	3	4	Up-regulated
Sus_scrofa___SYTL3	1.74867	1.18606	13.8932	0.00100671	0.0194665	3	4	Up-regulated
Sus_scrofa___TAFA5	2.63684	-0.29675	13.7102	0.00101157	0.0195215	3	4	Up-regulated
Sus_scrofa___ENSSSCG00000030801	1.75155	4.00364	13.8608	0.00101167	0.0195215	3	4	Up-regulated
Sus_scrofa___HID1	2.28641	-0.455571	13.7844	0.00102075	0.0196557	3	4	Up-regulated
Sus_scrofa___DAPK3	1.44616	6.63507	13.8136	0.00102794	0.0197666	3	4	Up-regulated
Sus_scrofa___SHCBP1L	1.91274	2.96311	13.8062	0.00103104	0.0197997	3	4	Up-regulated
Sus_scrofa___NCS1	2.39778	1.64805	13.8122	0.00103323	0.019827	3	4	Up-regulated
Sus_scrofa___TLR3	1.83401	1.05512	13.8216	0.00103594	0.0198551	3	4	Up-regulated
Sus_scrofa___TENT5B	2.86917	1.35682	13.7365	0.00103766	0.0198551	3	4	Up-regulated
Sus_scrofa___ZNF274	0.900313	6.14052	13.7854	0.00103786	0.0198551	3	4	Up-regulated
Sus_scrofa___BTBD11	1.43267	2.43473	13.7854	0.00103885	0.0198551	3	4	Up-regulated
Sus_scrofa___CDYL2	1.30225	4.30022	13.7807	0.00103961	0.0198551	3	4	Up-regulated
Sus_scrofa___ENSSSCG00000037376	1.55903	6.24428	13.7802	0.00103972	0.0198551	3	4	Up-regulated
Sus_scrofa___LRATD2	4.3597	-1.85492	13.0199	0.00104668	0.0199544	3	4	Up-regulated
Sus_scrofa___INPP5F	1.70691	7.62131	13.7575	0.0010478	0.0199544	3	4	Up-regulated
Sus_scrofa___CLCA2	2.05221	0.820687	13.7752	0.00105073	0.0199848	3	4	Up-regulated
Sus_scrofa___NUP42	0.96075	4.34484	13.7384	0.00105475	0.0200453	3	4	Up-regulated
Sus_scrofa___LCP1	2.13817	1.17972	13.7301	0.00106122	0.0201031	3	4	Up-regulated
Sus_scrofa___TSPAN13	2.94086	-0.556647	13.5603	0.00106142	0.0201031	3	4	Up-regulated
Sus_scrofa___ENSSSCG00000047841	2.49707	-1.14526	13.243	0.001064	0.0201243	3	4	Up-regulated
Sus_scrofa___NTN4	2.41271	-0.329426	13.6811	0.00106487	0.020127	3	4	Up-regulated
Sus_scrofa___MARCKSL1	4.09255	-2.49519	12.5678	0.00107172	0.020215	3	4	Up-regulated
Sus_scrofa___FSTL4	1.55841	1.87927	13.675	0.00108013	0.0203459	3	4	Up-regulated
Sus_scrofa___VPS37C	0.860937	4.21572	13.6445	0.00108921	0.02042	3	4	Up-regulated
Sus_scrofa___C19orf38	1.49753	0.326003	13.6754	0.00108996	0.02042	3	4	Up-regulated
Sus_scrofa___RAB19	1.6826	0.411436	13.6433	0.00109907	0.0205489	3	4	Up-regulated
Sus_scrofa___SBNO2	1.14194	4.6026	13.593	0.0011086	0.0206896	3	4	Up-regulated
Sus_scrofa___PNPT1	1.14147	5.54707	13.5907	0.00110941	0.0206896	3	4	Up-regulated
Sus_scrofa___SHROOM4	2.94497	-0.671242	13.4011	0.00111306	0.0207189	3	4	Up-regulated
Sus_scrofa___ENSSSCG00000016426	1.4754	6.78163	13.5634	0.00111984	0.0208182	3	4	Up-regulated
Sus_scrofa___ENSSSCG00000017235	3.56358	-2.34152	12.5459	0.00112092	0.0208182	3	4	Up-regulated
Sus_scrofa___NCALD	1.66978	2.23846	13.5596	0.00112286	0.0208388	3	4	Up-regulated
Sus_scrofa___TDRP	3.08039	0.63157	13.5314	0.00112382	0.0208426	3	4	Up-regulated
Sus_scrofa___ZNF488	3.73422	-2.14571	12.2266	0.00113272	0.0209096	3	4	Up-regulated
Sus_scrofa___PAWR	2.42444	2.58556	13.519	0.00113819	0.0209723	3	4	Up-regulated
Sus_scrofa___ENSSSCG00000034015	1.86534	6.3352	13.5156	0.00113839	0.0209723	3	4	Up-regulated
Sus_scrofa___LTC4S	2.42794	-1.20521	13.059	0.00113948	0.0209784	3	4	Up-regulated
Sus_scrofa___KLF8	2.01902	-1.36804	13.0229	0.00114257	0.0210213	3	4	Up-regulated
Sus_scrofa___RBM47	1.30796	2.79091	13.5014	0.00114453	0.0210435	3	4	Up-regulated
Sus_scrofa___LGSN	2.58926	-0.727169	13.272	0.00114629	0.0210617	3	4	Up-regulated
Sus_scrofa___OLFML2B	2.17391	-1.79918	12.4911	0.00115815	0.0212515	3	4	Up-regulated
Sus_scrofa___CPNE2	2.71172	-0.0992025	13.4036	0.00117421	0.0214685	3	4	Up-regulated
Sus_scrofa___CACNG8	2.06748	-0.282862	13.2253	0.00117464	0.0214685	3	4	Up-regulated
Sus_scrofa___EIF4EBP1	1.24923	3.7224	13.4094	0.00118109	0.0215573	3	4	Up-regulated
Sus_scrofa___ADCY3	1.36062	1.50076	13.4179	0.00118183	0.0215573	3	4	Up-regulated
Sus_scrofa___PIM2	1.95561	-0.480491	13.3348	0.00118662	0.0216304	3	4	Up-regulated
Sus_scrofa___PDZK1	1.66504	1.74272	13.3886	0.00119291	0.0217308	3	4	Up-regulated
Sus_scrofa___H2BC21	1.84545	2.79434	13.3682	0.00119896	0.0217984	3	4	Up-regulated
Sus_scrofa___SLCO2B1	3.93625	-1.15212	12.4441	0.00119936	0.0217984	3	4	Up-regulated
Sus_scrofa___EML5	1.1406	5.97122	13.354	0.00120364	0.02184	3	4	Up-regulated
Sus_scrofa___EFCAB12	2.12803	-2.43188	11.9213	0.00121224	0.0219716	3	4	Up-regulated
Sus_scrofa___IKBIP	1.89934	3.11817	13.3288	0.00121457	0.0219951	3	4	Up-regulated
Sus_scrofa___GPR156	1.63455	2.08203	13.3088	0.00122481	0.0221225	3	4	Up-regulated
Sus_scrofa___NOS1AP	1.89744	2.07916	13.3039	0.00122649	0.0221333	3	4	Up-regulated
Sus_scrofa___GEMIN8	1.01864	2.44195	13.3002	0.00122715	0.0221333	3	4	Up-regulated
Sus_scrofa___CCDC3	2.0391	2.57928	13.2987	0.00122855	0.0221333	3	4	Up-regulated
Sus_scrofa___RHOH	2.19617	-1.49373	12.6906	0.00122866	0.0221333	3	4	Up-regulated
Papio_anubis_ACTA1	2.2283	1.9048	13.3035	0.00123309	0.0221564	3	4	Up-regulated
Sus_scrofa___SLITRK6	2.61706	-0.93088	13.3661	0.00123463	0.0221696	3	4	Up-regulated
Sus_scrofa___ATP1A2	1.8198	3.92754	13.2744	0.00123746	0.0222008	3	4	Up-regulated
Sus_scrofa___ENSSSCG00000046333	3.28409	-1.64298	12.4036	0.0012385	0.0222008	3	4	Up-regulated
Sus_scrofa___CTNND1	0.90356	8.15888	13.2611	0.00124299	0.022233	3	4	Up-regulated
Sus_scrofa___ENSSSCG00000009754	1.21106	2.69794	13.2582	0.00124501	0.022233	3	4	Up-regulated
Sus_scrofa___DDIT4	2.73417	4.68253	13.2532	0.00124666	0.0222413	3	4	Up-regulated
Sus_scrofa___ENSSSCG00000014600	1.3045	5.09577	13.2462	0.00124942	0.0222762	3	4	Up-regulated
Sus_scrofa___SDCBP	1.23789	4.50535	13.2444	0.00125025	0.0222767	3	4	Up-regulated
Sus_scrofa___GXYLT2	2.09322	-0.468014	12.9259	0.00125419	0.0223181	3	4	Up-regulated
Sus_scrofa___C5AR1	2.6444	-1.18252	12.804	0.00126437	0.0224503	3	4	Up-regulated
Sus_scrofa___TMEM212	3.81962	-2.06058	12.5223	0.00127163	0.0225216	3	4	Up-regulated
Sus_scrofa___ENSSSCG00000035473	2.13148	-0.707627	13.0241	0.00127313	0.0225216	3	4	Up-regulated
Sus_scrofa___NMRAL1	1.74175	6.8397	13.1911	0.00127356	0.0225216	3	4	Up-regulated
Sus_scrofa___SGMS2	1.45807	3.17805	13.1791	0.00127925	0.0225761	3	4	Up-regulated
Sus_scrofa___ENSSSCG00000010531	0.911476	5.25027	13.1635	0.00128583	0.0226769	3	4	Up-regulated
Sus_scrofa___SIGLEC15	2.46472	-1.43792	12.5576	0.00129185	0.0227687	3	4	Up-regulated
Sus_scrofa___ENSSSCG00000048016	2.08466	-0.0416165	13.1602	0.00129904	0.0228371	3	4	Up-regulated
Sus_scrofa___ANKRD1	1.66324	12.5368	13.1311	0.00130038	0.0228462	3	4	Up-regulated
Sus_scrofa___SLCO6A1	4.13308	8.16887	13.1228	0.00130417	0.0228837	3	4	Up-regulated
Sus_scrofa___ENSSSCG00000015814	2.00333	2.10898	13.1244	0.0013057	0.0228961	3	4	Up-regulated
Sus_scrofa___TTC29	1.47075	3.52294	13.1116	0.00131021	0.0229607	3	4	Up-regulated
Sus_scrofa___ENSSSCG00000027232	1.47779	-0.320588	13.0895	0.00131494	0.0230289	3	4	Up-regulated
Sus_scrofa___ENSSSCG00000029449	2.81159	-2.00157	12.2078	0.00131958	0.0230746	3	4	Up-regulated
Sus_scrofa___ENSSSCG00000012238	1.54273	1.0557	13.0662	0.00133818	0.023362	3	4	Up-regulated
Sus_scrofa___ENSSSCG00000050627	1.00875	3.39049	13.0379	0.00134354	0.023426	3	4	Up-regulated
Sus_scrofa___ENSSSCG00000044127	1.30271	4.01896	13.0312	0.00134661	0.0234499	3	4	Up-regulated
Sus_scrofa___MYBL1	1.79341	2.77079	13.0311	0.0013477	0.0234543	3	4	Up-regulated
Sus_scrofa___PPBP	4.69038	-2.86815	12.6696	0.00135019	0.0234756	3	4	Up-regulated
Sus_scrofa___KLHL5	2.3904	3.53483	13.0158	0.00135398	0.0234756	3	4	Up-regulated
Sus_scrofa___TRIB1	1.99358	5.25811	13.0074	0.00135775	0.0235091	3	4	Up-regulated
Sus_scrofa___HERPUD1	1.12742	5.34874	13.0055	0.00135862	0.0235091	3	4	Up-regulated
Sus_scrofa___ARHGAP9	1.83996	0.0701808	13.0114	0.00137291	0.0236696	3	4	Up-regulated
Sus_scrofa___PALD1	2.08338	-0.687349	12.6358	0.00137502	0.0236766	3	4	Up-regulated
Sus_scrofa___SPRED2	1.90901	6.37624	12.9614	0.0013797	0.0237129	3	4	Up-regulated
Sus_scrofa___CASP7	1.20818	4.39111	12.9547	0.00138305	0.0237556	3	4	Up-regulated
Sus_scrofa___TNFSF13B	2.43647	-0.5277	12.8929	0.00138519	0.0237777	3	4	Up-regulated
Sus_scrofa___ENSSSCG00000032903	1.87266	0.0357439	12.9778	0.0013865	0.0237854	3	4	Up-regulated
Sus_scrofa___NAGS	2.40563	-2.10895	11.7656	0.00138884	0.0238107	3	4	Up-regulated
Sus_scrofa___ENSSSCG00000051644	2.35074	-0.251041	12.7564	0.00139517	0.0238575	3	4	Up-regulated
Sus_scrofa___CTSW	2.06469	1.65014	12.9342	0.00139729	0.0238669	3	4	Up-regulated
Sus_scrofa___APAF1	1.13645	4.70183	12.8953	0.0014121	0.0240183	3	4	Up-regulated
Sus_scrofa___DNAJC6	1.70864	3.84839	12.8953	0.00141223	0.0240183	3	4	Up-regulated
Sus_scrofa___CASS4	1.35033	0.910713	12.9017	0.00141812	0.0240868	3	4	Up-regulated
Sus_scrofa___VWA5B2	2.44657	-0.606918	12.7587	0.00141887	0.0240868	3	4	Up-regulated
Sus_scrofa___HAS1	1.98605	1.10659	12.8394	0.0014232	0.0241244	3	4	Up-regulated
Sus_scrofa___EGFL8	2.65764	-1.03584	12.5241	0.0014237	0.0241244	3	4	Up-regulated
Sus_scrofa___ADGRL1	2.01155	0.569751	12.8791	0.00142611	0.0241505	3	4	Up-regulated
Sus_scrofa___MAGI1	1.35575	8.73238	12.863	0.00142813	0.0241638	3	4	Up-regulated
Sus_scrofa___ADGRB2	1.58538	-0.90452	12.7024	0.00142933	0.0241638	3	4	Up-regulated
Sus_scrofa___PNLIP	2.51405	-1.93864	11.9001	0.00143039	0.0241638	3	4	Up-regulated
Sus_scrofa___ENSSSCG00000003253	1.15821	5.67222	12.8403	0.00143958	0.0242598	3	4	Up-regulated
Sus_scrofa___MAP3K8	1.66004	3.24253	12.8259	0.00144718	0.0243434	3	4	Up-regulated
Sus_scrofa___GPR34	2.51389	-1.56337	12.0789	0.00145304	0.024384	3	4	Up-regulated
Sus_scrofa___RAB27B	2.92629	2.85649	12.8161	0.00145376	0.024384	3	4	Up-regulated
Sus_scrofa___EIF2S2	0.77864	5.339	12.8121	0.00145387	0.024384	3	4	Up-regulated
Sus_scrofa___DDC	2.11356	1.13535	12.8339	0.00145524	0.02439	3	4	Up-regulated
Sus_scrofa___ENSSSCG00000044325	1.44298	1.31734	12.8156	0.00145766	0.0244158	3	4	Up-regulated
Sus_scrofa___CXCL10	5.57206	-2.18581	12.1961	0.00146334	0.0244562	3	4	Up-regulated
Sus_scrofa___ENSSSCG00000046747	1.53958	1.34425	12.7736	0.00147768	0.0246468	3	4	Up-regulated
Sus_scrofa___TTF2	1.2551	2.98019	12.7566	0.00148316	0.0246786	3	4	Up-regulated
Sus_scrofa___PDXP	2.12103	-1.00733	12.4348	0.00149126	0.024792	3	4	Up-regulated
Sus_scrofa___FRK	1.27634	-0.0579821	12.7437	0.00149355	0.024792	3	4	Up-regulated
Sus_scrofa___ENSSSCG00000031706	1.52896	2.71707	12.7321	0.00149609	0.0248053	3	4	Up-regulated
Sus_scrofa___GALNT18	1.72946	2.31402	12.7175	0.00150526	0.024917	3	4	Up-regulated
Sus_scrofa___GCNT3	2.82392	5.10239	12.6999	0.00151257	0.0250175	3	4	Up-regulated
Sus_scrofa___TRPV2	2.75243	-2.44113	11.4203	0.0015204	0.025087	3	4	Up-regulated
Sus_scrofa___MFSD14B	1.02613	4.93961	12.6832	0.00152141	0.0250888	3	4	Up-regulated
Sus_scrofa___RFTN2	1.96638	1.06545	12.6866	0.00152754	0.0251299	3	4	Up-regulated
Sus_scrofa___MGAT3	2.35062	-0.258613	12.6215	0.00153005	0.0251505	3	4	Up-regulated
Sus_scrofa___VPS13A	0.703578	7.04813	12.6661	0.00153061	0.0251505	3	4	Up-regulated
Sus_scrofa___ENSSSCG00000027039	1.62992	-0.274122	12.6475	0.001537	0.0252066	3	4	Up-regulated
Sus_scrofa___RND3	1.45875	6.33762	12.6509	0.00153886	0.0252066	3	4	Up-regulated
Sus_scrofa___LHFPL5	1.6629	-0.238544	12.6501	0.00154202	0.0252183	3	4	Up-regulated
Sus_scrofa___ENSSSCG00000004572	2.32196	-1.82024	11.7199	0.00154202	0.0252183	3	4	Up-regulated
Sus_scrofa___C3	2.49642	-1.13458	12.2731	0.00154686	0.0252675	3	4	Up-regulated
Sus_scrofa___ZNF292	0.757838	8.03917	12.6307	0.00154988	0.0253019	3	4	Up-regulated
Sus_scrofa___WTIP	1.17631	4.94866	12.6258	0.0015526	0.0253165	3	4	Up-regulated
Sus_scrofa___IRAK2	2.06855	1.10335	12.6312	0.00155767	0.0253691	3	4	Up-regulated
Sus_scrofa___MAP4K1	2.59176	-1.52288	11.8718	0.00156373	0.0254529	3	4	Up-regulated
Sus_scrofa___ITGB3	2.33566	0.429785	12.6096	0.00156766	0.0254719	3	4	Up-regulated
Sus_scrofa___MTR	1.18874	5.78237	12.5876	0.0015737	0.0255449	3	4	Up-regulated
Sus_scrofa___ID3	3.09683	-0.0611849	12.4102	0.00157724	0.0255675	3	4	Up-regulated
Sus_scrofa___SLC12A1	1.97325	0.809765	12.5968	0.00158057	0.025594	3	4	Up-regulated
Sus_scrofa___ENSSSCG00000023788	2.73763	-0.930165	12.2304	0.00158332	0.0256211	3	4	Up-regulated
Sus_scrofa___RNASE1	2.3729	-1.56781	11.9413	0.00158935	0.0256618	3	4	Up-regulated
Sus_scrofa___ENSSSCG00000010190	1.50542	9.2646	12.558	0.00159024	0.0256618	3	4	Up-regulated
Sus_scrofa___LHX4	1.45899	-0.313336	12.5634	0.00159035	0.0256618	3	4	Up-regulated
Sus_scrofa___HSPA1L	1.41595	0.651668	12.5774	0.00159138	0.0256618	3	4	Up-regulated
Sus_scrofa___ENSSSCG00000048793	1.8139	-0.538968	12.4964	0.00159653	0.0257146	3	4	Up-regulated
Sus_scrofa___GSDMD	2.66931	-2.57108	11.36	0.00163384	0.0261924	3	4	Up-regulated
Sus_scrofa___ABI3BP	2.2912	3.92193	12.4806	0.00163472	0.0261924	3	4	Up-regulated
Sus_scrofa___DUSP2	2.89711	-0.525643	12.3276	0.00163606	0.0261988	3	4	Up-regulated
Sus_scrofa___SLC24A1	1.68802	2.21076	12.4723	0.00164117	0.0262654	3	4	Up-regulated
Sus_scrofa___ARHGAP45	3.03508	-1.17911	11.9036	0.00165663	0.0264059	3	4	Up-regulated
Sus_scrofa___EPB42	1.51361	-0.0864361	12.4481	0.00165922	0.0264282	3	4	Up-regulated
Sus_scrofa___ENSSSCG00000032082	1.27593	1.15206	12.4497	0.00165994	0.0264282	3	4	Up-regulated
Sus_scrofa___NCAPD2	0.864856	4.45522	12.433	0.00166248	0.0264534	3	4	Up-regulated
Sus_scrofa___MEGF6	2.31724	0.546885	12.4518	0.00167012	0.0265195	3	4	Up-regulated
Sus_scrofa___KLRG1	2.41614	-1.5472	11.8223	0.00167046	0.0265195	3	4	Up-regulated
Sus_scrofa___GGN	3.31628	-2.48592	11.5043	0.00167758	0.0265714	3	4	Up-regulated
Sus_scrofa___HEATR9	1.85641	1.5541	12.4098	0.00168162	0.0266028	3	4	Up-regulated
Sus_scrofa___PTAFR	2.07795	-0.618157	12.2296	0.0016843	0.0266169	3	4	Up-regulated
Sus_scrofa___ENSSSCG00000028674	2.98552	-1.88291	11.4199	0.00168619	0.0266316	3	4	Up-regulated
Sus_scrofa___FOSL1	4.67043	-1.24185	11.8918	0.00170077	0.026816	3	4	Up-regulated
Sus_scrofa___ENSSSCG00000041185	2.76856	0.956745	12.3893	0.00170271	0.0268187	3	4	Up-regulated
Sus_scrofa___PLK3	2.58248	-1.59756	11.6575	0.00170664	0.0268473	3	4	Up-regulated
Sus_scrofa___CLIC3	2.39633	-1.85599	11.4485	0.00171258	0.0269255	3	4	Up-regulated
Sus_scrofa___VSIG4	3.04341	-1.71248	11.6605	0.00172645	0.027082	3	4	Up-regulated
Sus_scrofa___TTC39A	1.87976	3.70242	12.3212	0.00173032	0.0271274	3	4	Up-regulated
Sus_scrofa___DDX3X	1.35378	6.7109	12.2907	0.0017489	0.0273721	3	4	Up-regulated
Sus_scrofa___ENSSSCG00000038594	1.20332	5.74391	12.2882	0.00175045	0.0273808	3	4	Up-regulated
Sus_scrofa___TAF5L	1.27	5.08772	12.2804	0.00175536	0.0274266	3	4	Up-regulated
Sus_scrofa___DPYS	1.32687	0.274081	12.2806	0.00176727	0.0275661	3	4	Up-regulated
Sus_scrofa___ENSSSCG00000048968	2.71424	1.46983	12.2462	0.00178509	0.0277813	3	4	Up-regulated
Sus_scrofa___MAP3K14	1.32261	5.88913	12.1974	0.00180824	0.027999	3	4	Up-regulated
Sus_scrofa___TULP2	1.80991	1.39297	12.2041	0.0018109	0.027999	3	4	Up-regulated
Sus_scrofa___ENSSSCG00000032469	0.877017	3.68626	12.1925	0.00181161	0.027999	3	4	Up-regulated
Sus_scrofa___CIAPIN1	1.33811	3.13264	12.192	0.00181222	0.027999	3	4	Up-regulated
Sus_scrofa___ENSSSCG00000017734	1.97593	1.49749	12.1998	0.00181229	0.027999	3	4	Up-regulated
Sus_scrofa___MEGF9	0.924696	3.82001	12.1893	0.00181369	0.027999	3	4	Up-regulated
Papio_anubis_ENSPANG00000050525	4.31751	-2.72094	11.5442	0.00181484	0.027999	3	4	Up-regulated
Sus_scrofa___HSF4	1.90844	-1.38713	11.7485	0.00181576	0.027999	3	4	Up-regulated
Sus_scrofa___ENSSSCG00000032422	1.51739	2.71022	12.1867	0.00181628	0.027999	3	4	Up-regulated
Sus_scrofa___ANGPTL3	1.97618	1.46012	12.1883	0.0018196	0.028019	3	4	Up-regulated
Sus_scrofa___SLC44A2	1.80271	6.11891	12.1695	0.00182642	0.0280927	3	4	Up-regulated
Sus_scrofa___PJA1	1.46263	1.76916	12.1717	0.00182837	0.0280946	3	4	Up-regulated
Sus_scrofa___ENSSSCG00000039222	2.37143	-1.39363	11.6859	0.0018363	0.0281593	3	4	Up-regulated
Sus_scrofa___HBQ1	3.18741	-2.06267	11.1132	0.00183685	0.0281593	3	4	Up-regulated
Sus_scrofa___M1AP	2.81156	3.3811	12.1493	0.00184143	0.0282138	3	4	Up-regulated
Sus_scrofa___TP53TG5	2.63214	-1.77129	11.3987	0.00184572	0.0282639	3	4	Up-regulated
Sus_scrofa___RSPO4	1.54083	-1.003	11.9472	0.00184926	0.0283025	3	4	Up-regulated
Sus_scrofa___ENSSSCG00000001931	3.00589	2.26034	12.1402	0.00185136	0.0283032	3	4	Up-regulated
Sus_scrofa___NPTXR	2.12976	-1.18373	11.7315	0.00186916	0.0285125	3	4	Up-regulated
Sus_scrofa___MYO1G	1.88748	0.830414	12.1179	0.00187381	0.0285519	3	4	Up-regulated
Sus_scrofa___ENSSSCG00000033734	5.35803	-2.65129	11.3562	0.00188658	0.0287039	3	4	Up-regulated
Sus_scrofa___TNN	1.81469	-0.607593	11.9468	0.00190434	0.0289212	3	4	Up-regulated
Sus_scrofa___PNP	1.46345	1.27833	12.0629	0.00190461	0.0289212	3	4	Up-regulated
Sus_scrofa___RXFP2	2.24169	-0.603146	11.9463	0.00190641	0.0289212	3	4	Up-regulated
Sus_scrofa___PADI6	3.29844	-2.44158	10.9909	0.00191009	0.0289611	3	4	Up-regulated
Sus_scrofa___ILDR2	3.58245	2.60418	12.0264	0.00192669	0.0291213	3	4	Up-regulated
Sus_scrofa___UPB1	1.39334	0.241872	12.0158	0.00192697	0.0291213	3	4	Up-regulated
Sus_scrofa___IL10RB	1.04617	3.37666	12.0194	0.00192807	0.0291221	3	4	Up-regulated
Sus_scrofa___UNC93B1	1.71393	0.850016	12.0345	0.00193055	0.0291436	3	4	Up-regulated
Sus_scrofa___FGD3	1.75053	0.588433	12.0315	0.00193346	0.0291716	3	4	Up-regulated
Sus_scrofa___SULF1	2.56299	0.46148	12.0258	0.00193607	0.0291782	3	4	Up-regulated
Sus_scrofa___TSPAN5	2.81067	3.67355	11.9814	0.00195704	0.0293354	3	4	Up-regulated
Sus_scrofa___IQGAP2	1.95529	2.16823	11.9773	0.00195978	0.029346	3	4	Up-regulated
Sus_scrofa___ZCCHC9	0.969715	3.66303	11.9706	0.0019622	0.0293651	3	4	Up-regulated
Sus_scrofa___ENTPD4	0.806605	4.56106	11.9668	0.00196463	0.0293697	3	4	Up-regulated
Sus_scrofa___F10	1.50782	0.869925	11.9654	0.00197914	0.0295546	3	4	Up-regulated
Sus_scrofa___TTPAL	1.0384	2.56225	11.9442	0.00198169	0.0295767	3	4	Up-regulated
Sus_scrofa___FABP2	2.31967	1.02456	11.9555	0.00198648	0.0296235	3	4	Up-regulated
Sus_scrofa___PPARG	2.82091	4.4176	11.9358	0.00198696	0.0296235	3	4	Up-regulated
Sus_scrofa___TTC9	1.86191	0.342785	11.8364	0.00199069	0.0296631	3	4	Up-regulated
Sus_scrofa___GTF2B	0.701906	5.27611	11.9125	0.00200353	0.0298223	3	4	Up-regulated
Sus_scrofa___YWHAH	1.1525	4.99718	11.8937	0.00201719	0.0299157	3	4	Up-regulated
Sus_scrofa___PCK2	1.45909	0.175739	11.9066	0.00202356	0.0299433	3	4	Up-regulated
Sus_scrofa___NPPA	3.39324	4.45976	11.8693	0.00203548	0.0300715	3	4	Up-regulated
Sus_scrofa___RGS18	3.28229	-1.44204	11.3242	0.00203777	0.0300857	3	4	Up-regulated
Sus_scrofa___PGM2	0.8991	3.54223	11.8649	0.00203862	0.0300857	3	4	Up-regulated
Sus_scrofa___ENSSSCG00000008599	2.96199	-1.83798	10.9799	0.00204621	0.0301655	3	4	Up-regulated
Sus_scrofa___ASIC4	1.76566	0.805829	11.8697	0.00205201	0.0302189	3	4	Up-regulated
Sus_scrofa___ASPRV1	0.842333	5.3238	11.8431	0.0020545	0.0302394	3	4	Up-regulated
Sus_scrofa___VAV1	1.72213	-0.0649778	11.8422	0.00206153	0.0303268	3	4	Up-regulated
Sus_scrofa___PTX3	4.71266	-2.3893	11.3431	0.00207879	0.0305319	3	4	Up-regulated
Sus_scrofa___NAPSA	2.01455	-1.06292	11.56	0.00208802	0.0305864	3	4	Up-regulated
Sus_scrofa___TRHDE	1.81898	1.38649	11.7964	0.0020957	0.0306613	3	4	Up-regulated
Sus_scrofa___SSBP4	1.19277	2.39425	11.7904	0.00209646	0.0306613	3	4	Up-regulated
Sus_scrofa___BAG3	1.3051	6.80422	11.7809	0.0021013	0.0307159	3	4	Up-regulated
Sus_scrofa___PHF7	2.10236	-1.51913	11.2044	0.00211033	0.0308152	3	4	Up-regulated
Sus_scrofa___SLC6A6	2.69197	5.21092	11.7659	0.00211288	0.0308362	3	4	Up-regulated
Sus_scrofa___LYL1	2.40089	-2.02391	10.873	0.00211976	0.0309041	3	4	Up-regulated
Sus_scrofa___ENSSSCG00000012362	1.21614	2.91818	11.7551	0.0021219	0.0309189	3	4	Up-regulated
Sus_scrofa___RAB11FIP5	1.39304	2.94133	11.7511	0.00212496	0.0309309	3	4	Up-regulated
Sus_scrofa___LRRC59	0.859743	2.58328	11.7403	0.00213361	0.0310406	3	4	Up-regulated
Sus_scrofa___LHX6	2.90661	-1.59334	11.0747	0.00214482	0.0311587	3	4	Up-regulated
Sus_scrofa___LVRN	2.62729	-0.148614	11.7294	0.00214511	0.0311587	3	4	Up-regulated
Sus_scrofa___ENSSSCG00000005358	1.30489	6.16092	11.7186	0.00214946	0.0311892	3	4	Up-regulated
Sus_scrofa___MCM5	2.46625	-1.93069	10.7264	0.00215841	0.0312534	3	4	Up-regulated
Sus_scrofa___DNAJA1	1.06983	3.87716	11.6962	0.00216727	0.0313489	3	4	Up-regulated
Sus_scrofa___SPINK4	1.95254	1.06139	11.6928	0.00217466	0.0314381	3	4	Up-regulated
Sus_scrofa___KLK7	2.41232	-2.04036	10.7769	0.0021757	0.0314381	3	4	Up-regulated
Sus_scrofa___MON1B	0.992734	2.22878	11.6823	0.00218004	0.0314611	3	4	Up-regulated
Sus_scrofa___ANKS4B	1.94106	-1.41607	11.2728	0.00218152	0.0314611	3	4	Up-regulated
Sus_scrofa___BRI3BP	1.43412	0.817773	11.6896	0.00218298	0.0314611	3	4	Up-regulated
Sus_scrofa___SLC13A5	2.2712	2.57088	11.6706	0.00219118	0.03153	3	4	Up-regulated
Sus_scrofa___HSPA13	1.35691	2.53222	11.6658	0.00219239	0.031531	3	4	Up-regulated
Sus_scrofa___ENSSSCG00000031818	0.879944	4.95762	11.6342	0.00221664	0.0317478	3	4	Up-regulated
Sus_scrofa___ENSSSCG00000011729	1.08585	7.00438	11.6138	0.00223316	0.0319348	3	4	Up-regulated
Sus_scrofa___SPACA3	2.92505	1.06707	11.619	0.00224476	0.0320532	3	4	Up-regulated
Sus_scrofa___PDK1	1.05966	6.01168	11.5969	0.00224693	0.0320654	3	4	Up-regulated
Sus_scrofa___DNAJB5	0.993347	4.98061	11.5921	0.00225094	0.0320916	3	4	Up-regulated
Sus_scrofa___CCM2L	3.56598	-2.47289	10.9208	0.00225108	0.0320916	3	4	Up-regulated
Sus_scrofa___FASN	1.64841	0.978464	11.5919	0.00226014	0.0321941	3	4	Up-regulated
Sus_scrofa___MAX	1.13776	6.52199	11.5803	0.00226061	0.0321941	3	4	Up-regulated
Sus_scrofa___ISX	1.39492	1.18513	11.5859	0.00226483	0.0322046	3	4	Up-regulated
Sus_scrofa___FLYWCH2	1.36466	1.31477	11.5752	0.00227117	0.0322781	3	4	Up-regulated
Sus_scrofa___ACTG1	1.21353	8.29561	11.5551	0.00228156	0.0324007	3	4	Up-regulated
Sus_scrofa___PXK	0.616203	6.88935	11.5544	0.00228214	0.0324007	3	4	Up-regulated
Sus_scrofa___ENSSSCG00000000659	1.40055	2.29218	11.5533	0.00228539	0.0324302	3	4	Up-regulated
Sus_scrofa___ENSSSCG00000047907	1.38968	1.61414	11.555	0.00228668	0.032432	3	4	Up-regulated
Sus_scrofa___GPX3	3.73122	0.861351	11.5709	0.00229101	0.0324542	3	4	Up-regulated
Sus_scrofa___NDFIP2	0.72952	6.20201	11.5433	0.00229147	0.0324542	3	4	Up-regulated
Sus_scrofa___PLAGL1	0.887786	7.49975	11.5336	0.00229957	0.0325147	3	4	Up-regulated
Sus_scrofa___TEX52	2.61849	-1.56874	10.8565	0.0023283	0.0328192	3	4	Up-regulated
Sus_scrofa___EREG	2.44659	1.15044	11.5027	0.00234001	0.0329257	3	4	Up-regulated
Sus_scrofa___SETX	1.22474	6.19852	11.478	0.00234691	0.0329892	3	4	Up-regulated
Sus_scrofa___ALX3	3.32882	-2.83055	10.8603	0.00235339	0.0330562	3	4	Up-regulated
Sus_scrofa___ERAP1	1.06866	3.24214	11.4577	0.00236517	0.033188	3	4	Up-regulated
Sus_scrofa___NMUR2	2.19789	0.987919	11.4706	0.00236825	0.0331985	3	4	Up-regulated
Sus_scrofa___ENSSSCG00000050069	1.64452	-0.0456829	11.4641	0.00236833	0.0331985	3	4	Up-regulated
Sus_scrofa___ARHGEF16	2.1772	-2.41926	10.3862	0.00237265	0.0332255	3	4	Up-regulated
Sus_scrofa___STXBP2	3.00474	-2.31155	10.3952	0.00237489	0.0332401	3	4	Up-regulated
Sus_scrofa___CFAP52	1.46744	-0.165562	11.4415	0.00238055	0.0332913	3	4	Up-regulated
Sus_scrofa___SLC39A8	2.11014	-1.4456	10.9456	0.00238096	0.0332913	3	4	Up-regulated
Sus_scrofa___KCNQ5	2.25483	5.3291	11.4216	0.00239608	0.0334689	3	4	Up-regulated
Sus_scrofa___PRDM8	2.84965	-2.34301	10.3728	0.00241303	0.0336325	3	4	Up-regulated
Sus_scrofa___ENSSSCG00000040797	2.39778	-0.771977	11.1096	0.00241387	0.0336325	3	4	Up-regulated
Sus_scrofa___C1QTNF2	1.52967	1.40986	11.4059	0.00241661	0.0336473	3	4	Up-regulated
Sus_scrofa___DCLK1	1.12604	5.15381	11.3975	0.00241737	0.0336473	3	4	Up-regulated
Sus_scrofa___PYCR1	2.37839	-1.2212	10.9927	0.00242204	0.0336785	3	4	Up-regulated
Sus_scrofa___ENSSSCG00000001393	2.78826	-2.4685	10.3821	0.00242331	0.0336793	3	4	Up-regulated
Sus_scrofa___CRACDL	1.68869	4.32739	11.3862	0.00242769	0.0337232	3	4	Up-regulated
Sus_scrofa___COL6A3	2.27947	-0.708354	11.1853	0.00243082	0.0337421	3	4	Up-regulated
Sus_scrofa___RAB9B	1.55655	4.49687	11.3643	0.00244711	0.0339078	3	4	Up-regulated
Sus_scrofa___NIPAL2	2.08458	3.14632	11.3456	0.00246526	0.0340441	3	4	Up-regulated
Sus_scrofa___GNA14	2.06364	1.03042	11.3576	0.00246555	0.0340441	3	4	Up-regulated
Sus_scrofa___OPTC	3.45145	-1.98698	10.4106	0.00246854	0.0340684	3	4	Up-regulated
Sus_scrofa___ENSSSCG00000002281	0.802808	5.40541	11.3335	0.00247491	0.0340942	3	4	Up-regulated
Sus_scrofa___EPB41L4A	2.00955	2.27665	11.3355	0.0024759	0.0340942	3	4	Up-regulated
Sus_scrofa___ARPC1B	2.35859	-0.762239	11.1673	0.0024768	0.0340942	3	4	Up-regulated
Sus_scrofa___ENSSSCG00000044206	1.89096	0.966445	11.3277	0.00248791	0.0342027	3	4	Up-regulated
Sus_scrofa___EDARADD	1.51244	0.306637	11.3293	0.00249713	0.034243	3	4	Up-regulated
Sus_scrofa___LETM2	1.13142	3.21347	11.309	0.00249783	0.034243	3	4	Up-regulated
Sus_scrofa___CXCR6	2.00647	0.593143	11.2036	0.00250466	0.0342931	3	4	Up-regulated
Sus_scrofa___TRIB3	2.37223	2.12199	11.315	0.00250615	0.0342966	3	4	Up-regulated
Sus_scrofa___SARS1	1.20662	4.30928	11.2854	0.00251933	0.0343749	3	4	Up-regulated
Sus_scrofa___CNTN2	2.12323	2.49733	11.2644	0.00254155	0.0346269	3	4	Up-regulated
Sus_scrofa___SEPTIN3	1.18137	1.86906	11.2582	0.00254852	0.0346877	3	4	Up-regulated
Sus_scrofa___SLC16A13	3.44867	-1.84336	10.419	0.00255123	0.0347075	3	4	Up-regulated
Sus_scrofa___ENSSSCG00000043076	2.23875	-0.826458	11.0199	0.00256636	0.034838	3	4	Up-regulated
Sus_scrofa___JUNB	3.13395	-0.554887	11.0723	0.00256701	0.034838	3	4	Up-regulated
Sus_scrofa___SF3B6	0.957941	4.04589	11.2169	0.00258397	0.0350073	3	4	Up-regulated
Sus_scrofa___ENSSSCG00000009046	1.82474	-1.31867	10.8746	0.00258465	0.0350073	3	4	Up-regulated
Sus_scrofa___HMOX2	0.973622	7.28491	11.1919	0.00260774	0.035251	3	4	Up-regulated
Sus_scrofa___ME1	1.12335	5.30267	11.189	0.00261062	0.0352727	3	4	Up-regulated
Sus_scrofa___TCFL5	2.32593	0.0870221	11.1932	0.0026312	0.0354657	3	4	Up-regulated
Sus_scrofa___HEY1	5.27475	-2.85082	11.8306	0.00263657	0.035502	3	4	Up-regulated
Sus_scrofa___PHLDB3	2.17581	-1.63479	10.6354	0.00264038	0.035536	3	4	Up-regulated
Sus_scrofa___SERPINE2	2.39956	-0.333746	11.0668	0.00264463	0.0355758	3	4	Up-regulated
Sus_scrofa___RELT	1.53415	-0.148883	11.1258	0.00265317	0.0356734	3	4	Up-regulated
Sus_scrofa___C17orf78	1.677	-0.0765613	11.145	0.00266502	0.0358133	3	4	Up-regulated
Sus_scrofa___GLI1	2.7576	-2.16585	10.4436	0.00266866	0.0358294	3	4	Up-regulated
Sus_scrofa___ST3GAL5	2.06448	0.167975	11.0986	0.00269274	0.0360478	3	4	Up-regulated
Sus_scrofa___MPI	0.900584	2.65306	11.0999	0.00269952	0.0360862	3	4	Up-regulated
Sus_scrofa___SMPD3	1.38305	1.96133	11.097	0.00270518	0.0361356	3	4	Up-regulated
Sus_scrofa___INHBC	2.26931	-1.51966	10.605	0.00270829	0.0361356	3	4	Up-regulated
Sus_scrofa___CLEC12B	1.67395	-0.406584	11.0583	0.00270844	0.0361356	3	4	Up-regulated
Sus_scrofa___SNTB1	1.67256	4.52664	11.0776	0.0027208	0.036248	3	4	Up-regulated
Sus_scrofa___CCDC197	1.92853	2.83125	11.0762	0.00272329	0.0362638	3	4	Up-regulated
Sus_scrofa___FLT3	1.18426	0.793561	11.0867	0.00272652	0.0362894	3	4	Up-regulated
Sus_scrofa___RASSF8	1.16358	8.81407	11.0617	0.00273684	0.0364091	3	4	Up-regulated
Sus_scrofa___TRIM62	1.03335	1.37852	11.0642	0.0027431	0.0364574	3	4	Up-regulated
Sus_scrofa___RNASEH2B	0.946282	3.75197	11.0527	0.00274629	0.0364823	3	4	Up-regulated
Sus_scrofa___ACLY	0.770362	4.20995	11.0454	0.00275361	0.0365445	3	4	Up-regulated
Sus_scrofa___ENSSSCG00000004578	1.90097	4.45177	11.0387	0.00276056	0.0366191	3	4	Up-regulated
Sus_scrofa___CHRNB2	3.46079	-2.62673	10.3474	0.0027723	0.0366868	3	4	Up-regulated
Sus_scrofa___ARNTL	1.52695	6.56924	11.0219	0.00277763	0.0367048	3	4	Up-regulated
Sus_scrofa___CABP4	2.11503	-1.57337	10.477	0.00278254	0.0367171	3	4	Up-regulated
Sus_scrofa___RPL37A	2.09211	4.11865	11.0145	0.002786	0.0367452	3	4	Up-regulated
Sus_scrofa___ENSSSCG00000046893	4.51765	-2.77452	10.3646	0.00279367	0.0368288	3	4	Up-regulated
Papio_anubis_NLGN2	4.34312	-2.61288	10.4293	0.00281422	0.0370291	3	4	Up-regulated
Sus_scrofa___H4C8	3.82775	-2.30579	10.1581	0.0028232	0.0370768	3	4	Up-regulated
Sus_scrofa___CDKN1A	1.68538	3.48096	10.9774	0.00282463	0.037078	3	4	Up-regulated
Sus_scrofa___RNF19B	1.33763	5.00849	10.9683	0.00283385	0.0371405	3	4	Up-regulated
Sus_scrofa___CLNK	2.46495	0.400963	10.9491	0.00283441	0.0371405	3	4	Up-regulated
Sus_scrofa___PRKD2	0.958406	3.15768	10.9613	0.00284171	0.0371964	3	4	Up-regulated
Sus_scrofa___SERPINB1	1.68795	0.352139	10.9714	0.00285371	0.0373004	3	4	Up-regulated
Sus_scrofa___GAB3	3.36188	-2.04206	10.1375	0.00287631	0.037525	3	4	Up-regulated
Sus_scrofa___RAB42	2.16025	-1.54023	10.4442	0.00289242	0.0376507	3	4	Up-regulated
Sus_scrofa___ENSSSCG00000016184	4.4978	-2.82581	10.2112	0.00289275	0.0376507	3	4	Up-regulated
Sus_scrofa___ENSSSCG00000036297	2.06187	1.92144	10.9154	0.00289451	0.0376558	3	4	Up-regulated
Sus_scrofa___APOLD1	4.54257	-2.43455	10.3565	0.00289836	0.0376742	3	4	Up-regulated
Sus_scrofa___RASD1	2.60869	-1.65432	10.2999	0.00289864	0.0376742	3	4	Up-regulated
Sus_scrofa___ENSSSCG00000012915	2.14696	-0.362495	10.7837	0.00290657	0.0377428	3	4	Up-regulated
Sus_scrofa___ENSSSCG00000022401	1.63553	0.226044	10.9278	0.00290665	0.0377428	3	4	Up-regulated
Sus_scrofa___SEMA3F	2.56934	-1.13332	10.6074	0.00291136	0.0377862	3	4	Up-regulated
Sus_scrofa___CPT1C	1.89149	-1.01497	10.7565	0.00291524	0.0378189	3	4	Up-regulated
Sus_scrofa___GCLC	1.08218	4.05745	10.8827	0.00292593	0.0378912	3	4	Up-regulated
Sus_scrofa___VMP1	0.840957	7.16096	10.8812	0.00292732	0.0378912	3	4	Up-regulated
Sus_scrofa___GRIK5	1.22646	1.40865	10.8721	0.00294466	0.0380577	3	4	Up-regulated
Sus_scrofa___ADAMTS1	2.74955	5.60454	10.8532	0.00295831	0.0381985	3	4	Up-regulated
Sus_scrofa___KCNK5	1.77256	-2.19164	10.0008	0.00297465	0.0383733	3	4	Up-regulated
Sus_scrofa___NTAN1	1.37931	2.41731	10.838	0.00297718	0.0383733	3	4	Up-regulated
Sus_scrofa___MTFR1	1.02593	4.76768	10.8306	0.00298343	0.0383796	3	4	Up-regulated
Sus_scrofa___PRSS57	3.40933	-2.06094	10.5489	0.00298711	0.0384091	3	4	Up-regulated
Sus_scrofa___SLC5A6	1.58523	3.95364	10.8262	0.00298861	0.0384105	3	4	Up-regulated
Sus_scrofa___NFE2L3	1.79928	4.16993	10.824	0.00299098	0.0384232	3	4	Up-regulated
Sus_scrofa___ENSSSCG00000043967	1.5714	0.192299	10.8462	0.00299432	0.0384347	3	4	Up-regulated
Sus_scrofa___CD300LB	2.71471	-2.05295	10.0536	0.00299605	0.0384347	3	4	Up-regulated
Sus_scrofa___HNF1B	0.880927	3.4324	10.8178	0.00299814	0.0384437	3	4	Up-regulated
Sus_scrofa___KDM5B	0.650828	7.23777	10.8093	0.00300724	0.0384883	3	4	Up-regulated
Sus_scrofa___AMOTL1	0.801196	5.4704	10.8086	0.00300808	0.0384883	3	4	Up-regulated
Sus_scrofa___FAM76A	0.640259	6.31613	10.8081	0.00300857	0.0384883	3	4	Up-regulated
Sus_scrofa___HYOU1	1.02787	3.69635	10.7954	0.00302346	0.0386045	3	4	Up-regulated
Sus_scrofa___NUDCD1	1.74795	6.00353	10.7927	0.00302602	0.0386045	3	4	Up-regulated
Sus_scrofa___NPY	2.37207	-1.48583	10.1785	0.00302814	0.0386137	3	4	Up-regulated
Sus_scrofa___NTN1	1.8671	2.26122	10.7844	0.00303991	0.0387281	3	4	Up-regulated
Sus_scrofa___COL12A1	2.44038	-0.753282	10.6228	0.00305231	0.0388295	3	4	Up-regulated
Sus_scrofa___CSF1R	2.03338	2.03268	10.7725	0.00305472	0.0388295	3	4	Up-regulated
Sus_scrofa___ENSSSCG00000039009	1.57393	3.28733	10.7632	0.00306028	0.0388581	3	4	Up-regulated
Sus_scrofa___NRXN3	1.84118	6.57241	10.758	0.00306576	0.0388581	3	4	Up-regulated
Sus_scrofa___ENSSSCG00000004024	2.57197	-1.43142	10.3326	0.00306804	0.0388581	3	4	Up-regulated
Sus_scrofa___SPRYD3	1.00698	2.78694	10.7452	0.00308172	0.0389633	3	4	Up-regulated
Sus_scrofa___TLE1	2.0191	1.08024	10.7546	0.00308231	0.0389633	3	4	Up-regulated
Sus_scrofa___TAS1R1	1.13163	0.262271	10.7567	0.00308597	0.0389917	3	4	Up-regulated
Sus_scrofa___GABRP	2.33978	-2.16608	9.90212	0.00310283	0.0391144	3	4	Up-regulated
Sus_scrofa___EMCN	2.25249	0.727629	10.5544	0.0031095	0.0391269	3	4	Up-regulated
Sus_scrofa___SERPINB9	3.12043	-1.45134	10.1981	0.00311683	0.039167	3	4	Up-regulated
Sus_scrofa___SAG	1.05472	2.24342	10.714	0.00311912	0.0391682	3	4	Up-regulated
Sus_scrofa___FAM240A	1.83711	-0.557963	10.602	0.00312112	0.0391682	3	4	Up-regulated
Sus_scrofa___LIF	2.21322	-2.30391	9.82226	0.00312356	0.0391804	3	4	Up-regulated
Sus_scrofa___ARNTL2	1.38953	4.41039	10.7061	0.00312646	0.039199	3	4	Up-regulated
Sus_scrofa___CEND1	3.11001	-1.63106	9.93729	0.00312849	0.0392068	3	4	Up-regulated
Sus_scrofa___SLC35C2	1.18685	1.78626	10.7044	0.00313298	0.0392452	3	4	Up-regulated
Sus_scrofa___A2M	2.00088	-1.18311	10.4427	0.00313753	0.0392845	3	4	Up-regulated
Papio_anubis_USP36	4.12736	-2.92972	10.1234	0.00314137	0.0393062	3	4	Up-regulated
Sus_scrofa___PPP1R15A	1.59873	4.04756	10.6924	0.00314254	0.0393062	3	4	Up-regulated
Sus_scrofa___ENSSSCG00000044345	1.99708	0.448289	10.7081	0.00314637	0.0393062	3	4	Up-regulated
Sus_scrofa___ENSSSCG00000040134	1.84219	-0.372108	10.5556	0.00316668	0.039453	3	4	Up-regulated
Sus_scrofa___COL15A1	2.33092	-0.0789899	10.6354	0.0031704	0.0394816	3	4	Up-regulated
Sus_scrofa___PIP4K2A	1.36138	5.74351	10.6658	0.00317394	0.0395003	3	4	Up-regulated
Sus_scrofa___CMAH	1.91844	-0.037537	10.6403	0.00318245	0.0395782	3	4	Up-regulated
Sus_scrofa___WDFY4	1.65276	0.605389	10.6577	0.00319157	0.0396318	3	4	Up-regulated
Sus_scrofa___TMEM184C	0.8182	5.86505	10.6503	0.00319249	0.0396318	3	4	Up-regulated
Sus_scrofa___ABRACL	3.26654	-1.78558	10.0415	0.00319503	0.0396455	3	4	Up-regulated
Sus_scrofa___ATF5	1.70462	2.94431	10.6476	0.00319745	0.0396477	3	4	Up-regulated
Sus_scrofa___ENSSSCG00000038135	1.50982	-1.24244	10.3375	0.00319807	0.0396477	3	4	Up-regulated
Sus_scrofa___ARHGAP22	1.80625	1.10854	10.6488	0.00320684	0.0397277	3	4	Up-regulated
Sus_scrofa___PLCE1	1.84346	1.88396	10.6139	0.00324279	0.0400584	3	4	Up-regulated
Sus_scrofa___SPATC1	1.82353	-1.78723	10.0378	0.00325563	0.0401814	3	4	Up-regulated
Sus_scrofa___ENSSSCG00000016646	1.39938	8.41854	10.5937	0.00326141	0.0402294	3	4	Up-regulated
Sus_scrofa___EMB	1.35371	2.42098	10.5968	0.00326243	0.0402294	3	4	Up-regulated
Sus_scrofa___ENSSSCG00000040016	1.91971	-0.219907	10.5559	0.00328371	0.0404277	3	4	Up-regulated
Sus_scrofa___PCDH9	1.01012	4.09866	10.5693	0.00329186	0.0405007	3	4	Up-regulated
Sus_scrofa___CPM	1.92647	4.94047	10.5681	0.00329322	0.0405007	3	4	Up-regulated
Sus_scrofa___SLC25A33	1.15293	4.92492	10.5651	0.00329693	0.0405214	3	4	Up-regulated
Sus_scrofa___CDKN3	1.34266	2.88968	10.5631	0.00330029	0.0405214	3	4	Up-regulated
Sus_scrofa___TMEM63B	0.771124	4.52963	10.5609	0.00330222	0.0405214	3	4	Up-regulated
Sus_scrofa___SLC1A2	1.21842	7.15666	10.5467	0.0033199	0.0407023	3	4	Up-regulated
Sus_scrofa___ENSSSCG00000001341	2.61437	3.72546	10.5428	0.00332538	0.0407514	3	4	Up-regulated
Sus_scrofa___ENSSSCG00000016737	2.03672	2.84655	10.538	0.0033325	0.0407677	3	4	Up-regulated
Sus_scrofa___SLC6A4	1.89293	-0.192016	10.5377	0.00333408	0.0407677	3	4	Up-regulated
Sus_scrofa___ACTR3	0.753018	6.25544	10.5305	0.0033403	0.0408077	3	4	Up-regulated
Papio_anubis_MTSS1	5.08569	-2.48643	9.9401	0.003355	0.0409218	3	4	Up-regulated
Sus_scrofa___OPRD1	1.95273	0.378297	10.5441	0.00335851	0.0409218	3	4	Up-regulated
Sus_scrofa___PLBD2	0.767712	3.8114	10.5086	0.00336841	0.0410244	3	4	Up-regulated
Sus_scrofa___CD80	0.985549	3.81017	10.4887	0.00339389	0.0412258	3	4	Up-regulated
Sus_scrofa___F11R	3.8948	-2.15238	9.944	0.00340163	0.041286	3	4	Up-regulated
Sus_scrofa___LPCAT3	0.848224	5.23469	10.4824	0.00340183	0.041286	3	4	Up-regulated
Sus_scrofa___AIRE	3.52664	-2.37773	10.1612	0.00341212	0.0413564	3	4	Up-regulated
Sus_scrofa___MAPK15	2.93679	-2.41654	9.57072	0.00342959	0.0414844	3	4	Up-regulated
Sus_scrofa___MERTK	1.83072	0.324089	10.4595	0.00343017	0.0414844	3	4	Up-regulated
Sus_scrofa___ENSSSCG00000016186	1.9915	2.8707	10.4357	0.00346389	0.0418068	3	4	Up-regulated
Sus_scrofa___ENSSSCG00000031307	1.20595	2.74506	10.4124	0.00349722	0.042093	3	4	Up-regulated
Sus_scrofa___SPHK1	2.9331	0.0853545	10.3694	0.00350016	0.0421073	3	4	Up-regulated
Sus_scrofa___STAR	0.757395	4.01661	10.4064	0.00350158	0.0421073	3	4	Up-regulated
Sus_scrofa___ENSSSCG00000027515	1.97732	-0.130658	10.4136	0.00350325	0.0421073	3	4	Up-regulated
Sus_scrofa___PTPRB	1.47451	0.304097	10.412	0.00350874	0.0421073	3	4	Up-regulated
Sus_scrofa___DHRS13	1.43905	1.43001	10.4116	0.00350907	0.0421073	3	4	Up-regulated
Sus_scrofa___ENSSSCG00000009341	0.602843	8.68873	10.3986	0.00351178	0.0421216	3	4	Up-regulated
Sus_scrofa___LIFR	0.846021	7.42564	10.3852	0.00352964	0.0422991	3	4	Up-regulated
Sus_scrofa___VAX2	1.58293	-1.49935	9.98912	0.00354362	0.0424483	3	4	Up-regulated
Sus_scrofa___CLCA1	1.94991	2.81012	10.3716	0.00354975	0.0424721	3	4	Up-regulated
Sus_scrofa___AXDND1	1.38994	2.02178	10.3733	0.00355021	0.0424721	3	4	Up-regulated
Sus_scrofa___DES	1.4279	8.84547	10.3622	0.00356064	0.0425785	3	4	Up-regulated
Sus_scrofa___RND1	1.60712	-0.959457	10.1776	0.00357229	0.0426231	3	4	Up-regulated
Sus_scrofa___ENTPD6	0.999277	6.74553	10.3514	0.00357534	0.0426231	3	4	Up-regulated
Sus_scrofa___C5AR2	2.69214	-1.80445	9.69229	0.0035767	0.0426231	3	4	Up-regulated
Sus_scrofa___TIAM1	1.02518	2.86175	10.3505	0.00357776	0.0426231	3	4	Up-regulated
Sus_scrofa___H2AW	3.5746	-2.04931	9.668	0.00357784	0.0426231	3	4	Up-regulated
Sus_scrofa___ENSSSCG00000042183	1.27098	-0.282421	10.3239	0.00357824	0.0426231	3	4	Up-regulated
Sus_scrofa___ENSSSCG00000005247	1.96325	4.66963	10.3393	0.00359208	0.0426961	3	4	Up-regulated
Sus_scrofa___NUCB1	1.41614	0.362512	10.358	0.00359702	0.0426997	3	4	Up-regulated
Sus_scrofa___NFKBIB	1.11621	2.72498	10.3303	0.00360542	0.0427684	3	4	Up-regulated
Sus_scrofa___ENSSSCG00000010559	1.65784	-1.26309	10.0515	0.0036059	0.0427684	3	4	Up-regulated
Sus_scrofa___C3orf70	2.00109	-0.385071	10.2596	0.0036107	0.042788	3	4	Up-regulated
Papio_anubis_ENSPANG00000048037	5.81635	-0.855052	10.5497	0.00361656	0.042788	3	4	Up-regulated
Sus_scrofa___SKAP1	1.47883	2.54827	10.323	0.00361663	0.042788	3	4	Up-regulated
Sus_scrofa___HOOK2	1.37849	5.81552	10.3186	0.00362031	0.042788	3	4	Up-regulated
Sus_scrofa___ENSSSCG00000015645	0.969539	6.02813	10.31	0.0036322	0.04286	3	4	Up-regulated
Sus_scrofa___ENSSSCG00000037832	1.98505	1.41035	10.3156	0.0036366	0.0428886	3	4	Up-regulated
Sus_scrofa___CCDC24	2.76274	0.734274	10.3256	0.00363772	0.0428886	3	4	Up-regulated
Sus_scrofa___HMGCR	1.00675	2.78391	10.2963	0.00365254	0.0429727	3	4	Up-regulated
Sus_scrofa___MSH4	0.659787	5.66433	10.2953	0.00365262	0.0429727	3	4	Up-regulated
Sus_scrofa___ST6GALNAC5	0.975664	1.11729	10.2979	0.0036612	0.0430005	3	4	Up-regulated
Sus_scrofa___FN1	2.72658	-0.862607	10.0361	0.00367608	0.0431569	3	4	Up-regulated
Sus_scrofa___GPX1	3.16795	1.0793	10.2686	0.00367945	0.043169	3	4	Up-regulated
Sus_scrofa___INHBA	4.05765	2.05513	10.181	0.00368149	0.043169	3	4	Up-regulated
Sus_scrofa___LEKR1	0.912755	3.75447	10.2703	0.00368798	0.043205	3	4	Up-regulated
Sus_scrofa___EHBP1	1.51799	11.1369	10.2569	0.00370659	0.0433116	3	4	Up-regulated
Sus_scrofa___ENSSSCG00000007692	0.772114	6.27717	10.2567	0.00370684	0.0433116	3	4	Up-regulated
Sus_scrofa___ZMYM6	0.688087	5.26552	10.2559	0.00370802	0.0433116	3	4	Up-regulated
Sus_scrofa___TBX19	1.32637	-0.658023	10.2083	0.00372148	0.0434136	3	4	Up-regulated
Sus_scrofa___ENSSSCG00000051377	2.37439	-1.29823	9.89887	0.00373631	0.0435316	3	4	Up-regulated
Sus_scrofa___SLC9A3R1	2.37707	-0.957605	10.0711	0.00374451	0.0435881	3	4	Up-regulated
Sus_scrofa___SPATA21	1.14051	2.62088	10.2167	0.00376586	0.0437687	3	4	Up-regulated
Sus_scrofa___SERTAD3	1.59623	1.89398	10.2183	0.00376615	0.0437687	3	4	Up-regulated
Sus_scrofa___ENSSSCG00000034572	1.20535	1.84391	10.2177	0.00376787	0.0437702	3	4	Up-regulated
Sus_scrofa___MLXIP	0.924766	4.53727	10.2078	0.003777	0.0438211	3	4	Up-regulated
Sus_scrofa___OPN1SW	2.03369	-1.74933	9.6959	0.00378583	0.0439052	3	4	Up-regulated
Sus_scrofa___HACD4	2.30601	-1.32384	9.82492	0.00378871	0.0439201	3	4	Up-regulated
Sus_scrofa___PRSS12	2.1284	2.83012	10.191	0.00380353	0.0440366	3	4	Up-regulated
Sus_scrofa___HCN2	1.26631	0.329735	10.1807	0.00383825	0.0443644	3	4	Up-regulated
Papio_anubis_RNF181	2.34264	-2.07041	9.43597	0.00384183	0.0443872	3	4	Up-regulated
Sus_scrofa___PAPLN	1.77995	-0.528061	10.1249	0.00385431	0.0444942	3	4	Up-regulated
Sus_scrofa___ENSSSCG00000016284	2.86931	-1.93988	9.52745	0.00385892	0.0445289	3	4	Up-regulated
Sus_scrofa___IFI30	4.00214	-2.77262	9.93673	0.00388268	0.0446868	3	4	Up-regulated
Sus_scrofa___ENSSSCG00000002811	1.10567	0.778889	10.1461	0.00388389	0.0446868	3	4	Up-regulated
Sus_scrofa___ENSSSCG00000016437	1.50271	1.33397	10.1418	0.00388391	0.0446868	3	4	Up-regulated
Sus_scrofa___STAT4	1.44592	0.467084	10.1445	0.00389478	0.044756	3	4	Up-regulated
Sus_scrofa___THBS4	2.34857	0.194682	10.1349	0.00390061	0.0447858	3	4	Up-regulated
Sus_scrofa___ASTE1	0.822897	3.20134	10.1225	0.00390312	0.044796	3	4	Up-regulated
Sus_scrofa___EPHX3	2.66028	-2.27189	9.39886	0.00392663	0.0449914	3	4	Up-regulated
Sus_scrofa___PAFAH1B3	1.4622	1.42575	10.1158	0.00392704	0.0449914	3	4	Up-regulated
Sus_scrofa___LMO2	4.02434	-2.61081	9.44917	0.00394109	0.0451195	3	4	Up-regulated
Sus_scrofa___ENSSSCG00000012566	0.757839	5.06496	10.0934	0.00394629	0.0451417	3	4	Up-regulated
Sus_scrofa___ANKRD12	0.710262	8.20491	10.0835	0.00396135	0.0452578	3	4	Up-regulated
Sus_scrofa___VAMP5	1.16543	1.63575	10.0827	0.00397041	0.0453239	3	4	Up-regulated
Sus_scrofa___CAPN3	1.58785	1.63813	10.0589	0.00400737	0.0456517	3	4	Up-regulated
Sus_scrofa___CSF1	1.74794	1.79924	10.0518	0.00401667	0.0457372	3	4	Up-regulated
Sus_scrofa___TNFSF18	1.77429	-1.47083	9.71417	0.00401819	0.0457372	3	4	Up-regulated
Sus_scrofa___TEKT3	1.93839	-0.245944	10.0446	0.00402957	0.0458017	3	4	Up-regulated
Sus_scrofa___CBLIF	1.41773	-1.5868	9.6684	0.00403047	0.0458017	3	4	Up-regulated
Sus_scrofa___CLHC1	1.37045	2.16562	10.036	0.00403808	0.0458415	3	4	Up-regulated
Sus_scrofa___NUDT18	1.54756	-0.221274	10.0264	0.00403894	0.0458415	3	4	Up-regulated
Sus_scrofa___ENSSSCG00000038667	5.29061	-1.97845	9.79397	0.00404437	0.0458842	3	4	Up-regulated
Sus_scrofa___TRAT1	2.3191	-1.34841	9.65163	0.00405346	0.0459498	3	4	Up-regulated
Sus_scrofa___IDH2	0.751067	7.4463	10.0082	0.00407785	0.0461506	3	4	Up-regulated
Sus_scrofa___TMEM132A	1.79193	-1.17065	9.77685	0.00408951	0.0462636	3	4	Up-regulated
Sus_scrofa___H2AC17	1.0367	3.16269	9.99179	0.00410443	0.0463566	3	4	Up-regulated
Sus_scrofa___ENSSSCG00000029857	0.79982	4.60278	9.99001	0.00410669	0.0463632	3	4	Up-regulated
Sus_scrofa___MAP3K6	1.39458	0.451074	10.0075	0.00411213	0.0463769	3	4	Up-regulated
Sus_scrofa___ENSSSCG00000007554	1.2304	2.93059	9.98674	0.00411293	0.0463769	3	4	Up-regulated
Sus_scrofa___SLC4A1	1.99874	-1.69581	9.54095	0.00412772	0.0465058	3	4	Up-regulated
Sus_scrofa___C1QTNF6	2.38704	-0.883261	9.78992	0.00413414	0.0465402	3	4	Up-regulated
Sus_scrofa___CASP10	1.4993	4.36817	9.95715	0.00415921	0.0468034	3	4	Up-regulated
Sus_scrofa___DCBLD2	0.738752	4.80361	9.9501	0.00417041	0.0468342	3	4	Up-regulated
Sus_scrofa___TMEM198	1.41162	-0.634498	9.90742	0.0041893	0.0470081	3	4	Up-regulated
Sus_scrofa___ENSSSCG00000014097	1.0112	1.96361	9.93483	0.00419895	0.0470596	3	4	Up-regulated
Sus_scrofa___AMMECR1L	0.730273	4.48419	9.93089	0.00420152	0.0470596	3	4	Up-regulated
Sus_scrofa___IGF2BP2	0.997356	6.83957	9.91932	0.00422022	0.047202	3	4	Up-regulated
Sus_scrofa___BID	0.743654	3.96883	9.91205	0.00423242	0.0473002	3	4	Up-regulated
Sus_scrofa___ENSSSCG00000033101	1.91163	-1.19626	9.68678	0.00424766	0.0474322	3	4	Up-regulated
Sus_scrofa___RASGRF2	1.69833	0.769685	9.9116	0.00424986	0.0474377	3	4	Up-regulated
Sus_scrofa___PRKAR2B	1.74981	0.564825	9.91441	0.00425225	0.0474451	3	4	Up-regulated
Sus_scrofa___DYTN	1.12722	1.22077	9.89868	0.0042673	0.0475556	3	4	Up-regulated
Papio_anubis_IFFO2	4.1189	-3.02379	9.75741	0.00429152	0.0477677	3	4	Up-regulated
Sus_scrofa___NSD2	0.85144	5.10903	9.87206	0.00429818	0.0478034	3	4	Up-regulated
Sus_scrofa___BCL2A1	2.19794	-2.12561	9.22065	0.00430037	0.0478085	3	4	Up-regulated
Sus_scrofa___EPHB1	1.19496	1.67605	9.86748	0.00431246	0.0478822	3	4	Up-regulated
Sus_scrofa___DERL3	1.91671	-1.07677	9.64783	0.00432868	0.0479116	3	4	Up-regulated
Sus_scrofa___MYL12A	1.19798	5.708	9.84553	0.00434256	0.0479884	3	4	Up-regulated
Sus_scrofa___MRPS18B	3.46912	-2.82457	9.40638	0.00434994	0.0480224	3	4	Up-regulated
Sus_scrofa___GAS2	1.04653	3.96673	9.82225	0.0043823	0.0482925	3	4	Up-regulated
Sus_scrofa___ENSSSCG00000041954	1.39567	2.85474	9.82054	0.00438608	0.048315	3	4	Up-regulated
Sus_scrofa___CSKMT	1.56036	0.772556	9.80987	0.00440842	0.0484839	3	4	Up-regulated
Sus_scrofa___MMP3	1.90996	-1.49499	9.41272	0.00441554	0.0485429	3	4	Up-regulated
Sus_scrofa___ADAR	1.43885	5.46928	9.7876	0.00444133	0.0487585	3	4	Up-regulated
Sus_scrofa___COLGALT2	1.269	1.73771	9.79102	0.0044422	0.0487585	3	4	Up-regulated
Sus_scrofa___GCM1	1.241	0.225308	9.77632	0.00447112	0.0489788	3	4	Up-regulated
Sus_scrofa___ENSSSCG00000011436	2.85268	-1.39044	9.31525	0.00449598	0.0491538	3	4	Up-regulated
Sus_scrofa___CFL1	2.36016	0.888781	9.76448	0.00450485	0.0491761	3	4	Up-regulated
Sus_scrofa___MAST4	1.09869	9.86324	9.75041	0.00450596	0.0491761	3	4	Up-regulated
Sus_scrofa___GSTO2	1.65076	1.06565	9.75037	0.00451046	0.0491761	3	4	Up-regulated
Sus_scrofa___EME1	1.86676	-1.56463	9.33173	0.00451367	0.0491917	3	4	Up-regulated
Sus_scrofa___CNN2	1.22148	2.90886	9.7375	0.00452979	0.0493285	3	4	Up-regulated
Sus_scrofa___EFHB	1.34802	0.33809	9.72915	0.00454351	0.0494522	3	4	Up-regulated
Sus_scrofa___ENSSSCG00000000148	1.45041	1.89635	9.72134	0.00456231	0.049505	3	4	Up-regulated
Sus_scrofa___SLC43A3	2.96538	-1.98854	9.0792	0.00458463	0.0496083	3	4	Up-regulated
Sus_scrofa___TSPEAR	1.70143	0.478359	9.72533	0.00458567	0.0496083	3	4	Up-regulated
Sus_scrofa___PPM1N	1.85869	-1.3219	9.44644	0.00458596	0.0496083	3	4	Up-regulated
Sus_scrofa___TAGLN3	2.48287	-1.53685	9.19065	0.00459414	0.049658	3	4	Up-regulated
Sus_scrofa___CYP2S1	3.25308	-1.90294	9.20322	0.00460263	0.0496953	3	4	Up-regulated
Sus_scrofa___MAN2B2	1.26411	0.00037908	9.69799	0.00460901	0.0497022	3	4	Up-regulated
Sus_scrofa___ENSSSCG00000005453	1.57749	3.27016	9.68553	0.00462287	0.0497935	3	4	Up-regulated
Sus_scrofa___C9orf152	1.91557	-0.202411	9.61883	0.00464621	0.0499671	3	4	Up-regulated
Sus_scrofa___GALP	-5.41584	0.645825	98.8111	3.0716e-12	2.83314e-08	3	4	Down-regulated
Sus_scrofa___ANKRD66	-4.35992	-0.607339	47.8568	5.17949e-08	4.09491e-05	3	4	Down-regulated
Sus_scrofa___ENSSSCG00000036306	-4.31421	2.67118	55.4392	8.00822e-08	5.68194e-05	3	4	Down-regulated
Sus_scrofa___LRRC3B	-3.92573	2.10155	53.2774	1.2005e-07	6.51356e-05	3	4	Down-regulated
Sus_scrofa___RNF135	-3.29162	3.79184	50.5739	1.93635e-07	8.67987e-05	3	4	Down-regulated
Sus_scrofa___PHKA2	-2.10526	4.42592	50.2451	2.03893e-07	8.67987e-05	3	4	Down-regulated
Papio_anubis_ARID1B	-8.56427	-0.121985	46.8947	2.69045e-07	0.000100605	3	4	Down-regulated
Sus_scrofa___ENSSSCG00000013504	-2.76507	0.221535	45.0084	3.73525e-07	0.000123045	3	4	Down-regulated
Papio_anubis_STRN	-6.93649	-1.15728	42.0198	4.60272e-07	0.000143103	3	4	Down-regulated
Sus_scrofa___AUTS2	-2.66212	8.83597	44.9543	5.14245e-07	0.000147768	3	4	Down-regulated
Sus_scrofa___HPS4	-1.78567	3.85627	40.4011	1.21158e-06	0.000252073	3	4	Down-regulated
Papio_anubis_ENSPANG00000022056	-5.9438	-0.330884	35.3477	1.31883e-06	0.000268332	3	4	Down-regulated
Sus_scrofa___GRAMD1C	-2.41702	6.37884	39.7629	1.3718e-06	0.000275066	3	4	Down-regulated
Papio_anubis_NFAT5	-7.63345	-1.10445	34.0392	1.56186e-06	0.000302225	3	4	Down-regulated
Sus_scrofa___FNDC1	-4.43831	4.45182	38.925	1.62393e-06	0.000308975	3	4	Down-regulated
Papio_anubis_DDX6	-7.29183	-1.28137	34.748	2.05115e-06	0.000359224	3	4	Down-regulated
Sus_scrofa___TRPM7	-1.09357	9.66474	37.5815	2.12325e-06	0.000367203	3	4	Down-regulated
Sus_scrofa___ESRRG	-1.52018	9.42837	37.39	2.20789e-06	0.000372932	3	4	Down-regulated
Sus_scrofa___RNF207	-1.99726	6.57778	36.0929	2.88713e-06	0.000448819	3	4	Down-regulated
Papio_anubis_KIF13A	-5.18835	-0.548606	33.5171	3.28883e-06	0.000494593	3	4	Down-regulated
Sus_scrofa___MMP16	-1.6892	8.05303	35.0704	3.58165e-06	0.000516583	3	4	Down-regulated
Papio_anubis_PCCA	-4.96697	-0.832646	31.293	3.5844e-06	0.000516583	3	4	Down-regulated
Sus_scrofa___PAXBP1	-1.22887	7.61647	34.8515	3.75276e-06	0.000530754	3	4	Down-regulated
Papio_anubis_GXYLT1	-6.59669	-1.54124	31.7797	3.76973e-06	0.000530754	3	4	Down-regulated
Sus_scrofa___DAPL1	-2.85645	4.58011	34.8157	3.79781e-06	0.000530754	3	4	Down-regulated
Sus_scrofa___FGF13	-1.96908	9.69439	34.6556	3.91334e-06	0.000539586	3	4	Down-regulated
Papio_anubis_ZNF207	-3.91661	0.625017	32.7364	3.97062e-06	0.000541236	3	4	Down-regulated
Sus_scrofa___CEP85	-1.54568	7.03023	34.2825	4.24013e-06	0.000569556	3	4	Down-regulated
Sus_scrofa___STRIP2	-1.68997	6.59245	34.089	4.42122e-06	0.000585357	3	4	Down-regulated
Sus_scrofa___TRIP13	-1.5257	3.64769	34.0685	4.44452e-06	0.00058564	3	4	Down-regulated
Sus_scrofa___RAPGEF5	-1.62068	8.09602	33.4693	5.05941e-06	0.000643678	3	4	Down-regulated
Papio_anubis_EXOC6B	-5.51447	-0.38516	30.418	5.07108e-06	0.000643678	3	4	Down-regulated
Sus_scrofa___ENSSSCG00000041209	-3.72463	-0.806977	29.3403	5.61035e-06	0.000693998	3	4	Down-regulated
Sus_scrofa___BPHL	-1.669	3.85681	32.9254	5.70541e-06	0.000699588	3	4	Down-regulated
Papio_anubis_TNRC6A	-4.15074	-0.608603	29.2937	5.73144e-06	0.000699588	3	4	Down-regulated
Sus_scrofa___KCNJ3	-1.5379	9.82542	32.8654	5.77836e-06	0.000699961	3	4	Down-regulated
Sus_scrofa___ENSSSCG00000016365	-2.67134	0.202468	32.3104	5.84032e-06	0.000699961	3	4	Down-regulated
Sus_scrofa___SLF1	-1.82646	5.20086	32.7024	5.99131e-06	0.000711526	3	4	Down-regulated
Sus_scrofa___ADAMTSL1	-2.04483	7.78609	32.643	6.07051e-06	0.000717851	3	4	Down-regulated
Sus_scrofa___NAAA	-3.31868	3.95962	32.2813	6.59223e-06	0.000754336	3	4	Down-regulated
Sus_scrofa___ALDH5A1	-2.47103	4.46471	32.224	6.66744e-06	0.000759237	3	4	Down-regulated
Sus_scrofa___ENSSSCG00000009595	-2.79519	2.1082	32.0281	7.04377e-06	0.00079231	3	4	Down-regulated
Sus_scrofa___PPEF2	-3.03794	0.569955	31.2688	7.56385e-06	0.000837197	3	4	Down-regulated
Sus_scrofa___DPP4	-1.85169	8.6224	31.4193	7.99055e-06	0.000863697	3	4	Down-regulated
Sus_scrofa___ZNF521	-1.67278	8.62917	31.2727	8.26148e-06	0.000886059	3	4	Down-regulated
Sus_scrofa___ROBO2	-3.79516	6.35126	31.2364	8.33091e-06	0.000890056	3	4	Down-regulated
Papio_anubis_PAXBP1	-2.99438	0.378277	31.0966	8.44786e-06	0.000898378	3	4	Down-regulated
Sus_scrofa___ENSSSCG00000014314	-3.44255	0.843044	31.2507	8.47373e-06	0.000898378	3	4	Down-regulated
Papio_anubis_RHOT1	-3.36523	-0.147712	29.2619	9.14183e-06	0.000950991	3	4	Down-regulated
Sus_scrofa___SPATS2L	-1.36575	7.91046	30.6943	9.43166e-06	0.000967885	3	4	Down-regulated
Sus_scrofa___CATSPERG	-1.3487	4.04561	30.6584	9.51411e-06	0.000967885	3	4	Down-regulated
Sus_scrofa___ENSSSCG00000032157	-2.72099	-0.393626	29.6648	1.01115e-05	0.00101604	3	4	Down-regulated
Papio_anubis_DLG1	-3.95171	0.0481736	29.1798	1.01162e-05	0.00101604	3	4	Down-regulated
Sus_scrofa___HAUS8	-1.70492	3.59441	30.3863	1.01344e-05	0.00101604	3	4	Down-regulated
Sus_scrofa___CASD1	-1.12334	6.18218	30.3305	1.02589e-05	0.00102113	3	4	Down-regulated
Sus_scrofa___EPB41L5	-1.53798	7.3946	30.2515	1.04484e-05	0.00103626	3	4	Down-regulated
Sus_scrofa___RHOT1	-1.06915	8.54351	30.1696	1.06492e-05	0.00104125	3	4	Down-regulated
Sus_scrofa___PCMTD2	-1.37936	5.95539	30.0981	1.0828e-05	0.00105501	3	4	Down-regulated
Sus_scrofa___SLC38A5	-2.60301	0.855851	29.6662	1.1664e-05	0.00111559	3	4	Down-regulated
Papio_anubis_CDK14	-7.38621	-1.2292	27.0564	1.18103e-05	0.00112219	3	4	Down-regulated
Papio_anubis_MAPKAP1	-4.83121	-1.51208	25.9797	1.1969e-05	0.00112651	3	4	Down-regulated
Papio_anubis_CFAP36	-3.81776	-1.71141	25.6653	1.2279e-05	0.00114788	3	4	Down-regulated
Sus_scrofa___CTNNB1	-1.15149	6.74075	29.5333	1.23588e-05	0.00115145	3	4	Down-regulated
Sus_scrofa___NTM	-3.07165	5.29105	29.5151	1.24164e-05	0.00115293	3	4	Down-regulated
Sus_scrofa___ASB11	-2.90816	4.93282	29.4603	1.25776e-05	0.00116399	3	4	Down-regulated
Sus_scrofa___FRA10AC1	-1.90778	5.46003	29.3832	1.28045e-05	0.00117415	3	4	Down-regulated
Papio_anubis_QKI	-4.27497	1.66965	29.269	1.30344e-05	0.00117923	3	4	Down-regulated
Papio_anubis_NFIA	-3.55433	-0.777035	26.788	1.3412e-05	0.00120486	3	4	Down-regulated
Sus_scrofa___RYR2	-1.33755	13.8973	29.0977	1.36994e-05	0.00121782	3	4	Down-regulated
Sus_scrofa___GRB14	-1.56339	6.91525	28.9716	1.41164e-05	0.00124005	3	4	Down-regulated
Sus_scrofa___CAVIN4	-1.66381	2.26164	28.7526	1.49334e-05	0.00129536	3	4	Down-regulated
Papio_anubis_USP3	-3.91634	-0.891879	24.4921	1.63988e-05	0.00140053	3	4	Down-regulated
Sus_scrofa___DECR1	-1.16458	6.48978	28.2588	1.67461e-05	0.00142142	3	4	Down-regulated
Sus_scrofa___ENSSSCG00000038202	-1.33885	5.75044	28.0715	1.75222e-05	0.00147373	3	4	Down-regulated
Sus_scrofa___ENSSSCG00000035617	-2.3481	6.25101	28.0085	1.77922e-05	0.00148291	3	4	Down-regulated
Sus_scrofa___ASB4	-1.43027	8.56336	27.9564	1.8018e-05	0.00149165	3	4	Down-regulated
Papio_anubis_HNRNPH3	-6.77865	-1.49205	24.8622	1.8467e-05	0.00149165	3	4	Down-regulated
Sus_scrofa___ENSSSCG00000016898	-1.29693	4.94074	27.8322	1.85716e-05	0.00149165	3	4	Down-regulated
Sus_scrofa___CFAP97D1	-2.29565	2.54143	27.844	1.86195e-05	0.00149165	3	4	Down-regulated
Sus_scrofa___TYW3	-1.38438	4.02966	27.8052	1.86981e-05	0.00149165	3	4	Down-regulated
Papio_anubis_TFDP2	-4.51179	-1.39732	23.6406	1.90713e-05	0.00150238	3	4	Down-regulated
Papio_anubis_XPO1	-7.14977	-0.957471	26.5068	1.95997e-05	0.00153204	3	4	Down-regulated
Sus_scrofa___TRRAP	-0.913226	6.9629	27.5283	2.00006e-05	0.00155627	3	4	Down-regulated
Sus_scrofa___WRAP73	-1.8123	3.75328	27.5263	2.00222e-05	0.00155627	3	4	Down-regulated
Sus_scrofa___SMTN	-1.94173	5.57542	27.3362	2.09684e-05	0.00161691	3	4	Down-regulated
Sus_scrofa___MGST2	-2.02899	4.68396	27.3346	2.09776e-05	0.00161691	3	4	Down-regulated
Sus_scrofa___CCDC102A	-1.98051	0.716597	27.246	2.17477e-05	0.00165324	3	4	Down-regulated
Sus_scrofa___METAP1D	-1.04158	6.34167	27.1325	2.2045e-05	0.00166669	3	4	Down-regulated
Sus_scrofa___OSBPL3	-1.11006	8.16244	27.0692	2.23926e-05	0.00168801	3	4	Down-regulated
Sus_scrofa___PTPN4	-1.39653	9.35914	27.0026	2.27644e-05	0.00169331	3	4	Down-regulated
Papio_anubis_ZCCHC10	-4.86147	-1.56778	25.4906	2.38091e-05	0.00175686	3	4	Down-regulated
Papio_anubis_MAP4K5	-6.31762	-1.8692	24.8686	2.43045e-05	0.00177783	3	4	Down-regulated
Sus_scrofa___PCSK6	-1.54016	7.09601	26.4239	2.6293e-05	0.00187999	3	4	Down-regulated
Sus_scrofa___ENSSSCG00000002430	-1.97078	6.6619	26.1241	2.83503e-05	0.00199614	3	4	Down-regulated
Sus_scrofa___ENSSSCG00000004016	-2.36573	-0.798635	24.3896	2.85591e-05	0.00200573	3	4	Down-regulated
Sus_scrofa___CDAN1	-1.44773	3.59567	25.9443	2.96828e-05	0.0020637	3	4	Down-regulated
Sus_scrofa___ENSSSCG00000014575	-1.74575	6.16145	25.8751	3.01912e-05	0.00209379	3	4	Down-regulated
Sus_scrofa___ENSSSCG00000037928	-4.49737	-1.64332	21.817	3.13741e-05	0.00215422	3	4	Down-regulated
Papio_anubis_CELF2	-6.60571	-1.7421	22.5672	3.20202e-05	0.00217698	3	4	Down-regulated
Papio_anubis_AKAP9	-4.21131	-0.44777	23.6477	3.28496e-05	0.00221703	3	4	Down-regulated
Sus_scrofa___MRPL33	-1.26609	5.18632	25.2866	3.50801e-05	0.00231534	3	4	Down-regulated
Sus_scrofa___CCDC85A	-2.2556	8.29176	25.2251	3.56359e-05	0.00234223	3	4	Down-regulated
Papio_anubis_PHF20	-3.20568	0.378715	24.313	3.71622e-05	0.00241956	3	4	Down-regulated
Papio_anubis_STAG2	-4.03018	-0.0978548	23.3067	3.99357e-05	0.00252844	3	4	Down-regulated
Sus_scrofa___ROS1	-3.39266	3.72142	24.6611	4.1354e-05	0.0025948	3	4	Down-regulated
Papio_anubis_WAC	-5.61193	-0.916662	23.9894	4.19918e-05	0.00260825	3	4	Down-regulated
Sus_scrofa___SESN1	-1.19971	8.99454	24.588	4.20191e-05	0.00260825	3	4	Down-regulated
Papio_anubis_MATR3	-3.99218	-0.965007	23.175	4.26889e-05	0.00262499	3	4	Down-regulated
Sus_scrofa___TMEM131L	-1.64216	7.14533	24.3717	4.44586e-05	0.0027077	3	4	Down-regulated
Papio_anubis_MLLT10	-4.98201	-0.985059	22.446	4.46201e-05	0.0027077	3	4	Down-regulated
Sus_scrofa___KCNJ2	-1.78793	5.61476	24.3579	4.46211e-05	0.0027077	3	4	Down-regulated
Sus_scrofa___AKAP8	-1.23612	5.56041	24.3258	4.49982e-05	0.00272461	3	4	Down-regulated
Papio_anubis_CASD1	-3.06816	-0.964522	22.5611	4.65016e-05	0.00277915	3	4	Down-regulated
Papio_anubis_KIF13B	-4.05851	-0.845219	22.1361	4.85414e-05	0.00283972	3	4	Down-regulated
Sus_scrofa___GAB1	-1.13223	8.50817	24.0063	4.89365e-05	0.00285078	3	4	Down-regulated
Sus_scrofa___GRK3	-1.15323	7.05255	23.881	5.05826e-05	0.00292818	3	4	Down-regulated
Papio_anubis_RPS6KB1	-7.48395	-0.806235	23.3597	5.10929e-05	0.00294504	3	4	Down-regulated
Sus_scrofa___ENSSSCG00000034739	-3.44596	1.83693	23.8696	5.11931e-05	0.00294504	3	4	Down-regulated
Sus_scrofa___PDE4D	-1.36635	13.4291	23.6958	5.31274e-05	0.00303737	3	4	Down-regulated
Sus_scrofa___MRPS28	-1.26638	5.82672	23.6791	5.33634e-05	0.00304457	3	4	Down-regulated
Papio_anubis_TAF15	-4.33661	-0.815045	23.2466	5.44254e-05	0.00308043	3	4	Down-regulated
Sus_scrofa___ENSSSCG00000034220	-3.28868	0.316283	23.8424	5.44371e-05	0.00308043	3	4	Down-regulated
Papio_anubis_PPP3CB	-3.6719	-0.138647	22.3767	5.52208e-05	0.00309942	3	4	Down-regulated
Papio_anubis_RBFOX1	-2.52308	0.278976	22.8455	5.61065e-05	0.00314276	3	4	Down-regulated
Sus_scrofa___ECM2	-2.21727	6.49002	23.4141	5.72664e-05	0.0031948	3	4	Down-regulated
Sus_scrofa___STK36	-1.24908	3.55472	23.3469	5.83274e-05	0.00324034	3	4	Down-regulated
Papio_anubis_FER	-3.5069	-0.609435	21.8357	5.98873e-05	0.00327498	3	4	Down-regulated
Sus_scrofa___GNAO1	-2.44558	5.39809	23.2199	6.03313e-05	0.00327982	3	4	Down-regulated
Papio_anubis_PPP1R9A	-7.20462	-1.50835	20.8557	6.07134e-05	0.00329412	3	4	Down-regulated
Sus_scrofa___ZNF704	-1.97053	7.84533	23.1848	6.0893e-05	0.0032974	3	4	Down-regulated
Sus_scrofa___ENSSSCG00000042693	-2.81087	0.961225	22.7905	6.29221e-05	0.00339399	3	4	Down-regulated
Papio_anubis_USP34	-5.4721	-0.728885	21.2418	6.35563e-05	0.00341507	3	4	Down-regulated
Papio_anubis_MEF2A	-5.61567	-0.180559	22.7547	6.61633e-05	0.00352078	3	4	Down-regulated
Sus_scrofa___ENSSSCG00000015747	-3.04612	9.94455	22.7676	6.8146e-05	0.003593	3	4	Down-regulated
Papio_anubis_MTF2	-7.0267	-1.32261	21.8201	6.84824e-05	0.00360261	3	4	Down-regulated
Papio_anubis_RB1	-6.51831	-1.75546	20.326	7.13991e-05	0.00371369	3	4	Down-regulated
Sus_scrofa___VPS36	-1.157	5.88814	22.5286	7.27195e-05	0.00376658	3	4	Down-regulated
Sus_scrofa___DGAT1	-1.56206	2.79481	22.5178	7.31003e-05	0.00376658	3	4	Down-regulated
Papio_anubis_UBE2V2	-6.48554	-1.55962	21.414	7.3175e-05	0.00376658	3	4	Down-regulated
Sus_scrofa___PDE3B	-1.27764	9.83666	22.5035	7.32171e-05	0.00376658	3	4	Down-regulated
Papio_anubis_CHD9	-3.42642	-0.711796	20.703	7.34077e-05	0.00376858	3	4	Down-regulated
Papio_anubis_GRAMD1C	-3.84939	-2.05981	19.6232	7.36309e-05	0.0037708	3	4	Down-regulated
Sus_scrofa___RPAP1	-1.15495	4.45997	22.4788	7.37235e-05	0.0037708	3	4	Down-regulated
Papio_anubis_TLK2	-6.46693	-1.39259	21.3153	7.49348e-05	0.00382307	3	4	Down-regulated
Papio_anubis_HERC2	-4.62152	-1.39046	20.7394	7.50218e-05	0.00382307	3	4	Down-regulated
Sus_scrofa___MALT1	-1.48418	7.46803	22.3375	7.66135e-05	0.00387885	3	4	Down-regulated
Sus_scrofa___ANKRD39	-1.31086	8.10358	22.3263	7.685e-05	0.00387885	3	4	Down-regulated
Papio_anubis_ENSPANG00000017547	-2.91591	1.50014	22.1783	7.69573e-05	0.00387885	3	4	Down-regulated
Sus_scrofa___TXLNB	-1.70548	8.80918	22.268	7.80871e-05	0.00389966	3	4	Down-regulated
Papio_anubis_GOLGA4	-4.20352	-0.758759	19.8265	7.85555e-05	0.00389966	3	4	Down-regulated
Papio_anubis_REV3L	-6.96704	-1.22285	21.3944	7.9163e-05	0.00390133	3	4	Down-regulated
Papio_anubis_ARGLU1	-4.02407	-0.342306	20.9531	8.03599e-05	0.00393469	3	4	Down-regulated
Papio_anubis_AHCYL2	-6.99484	-1.32884	20.3816	8.04825e-05	0.00393469	3	4	Down-regulated
Sus_scrofa___DIP2A	-1.3957	6.47651	22.1319	8.10608e-05	0.00395597	3	4	Down-regulated
Papio_anubis_DDX17	-3.95643	-0.708112	20.0136	8.40161e-05	0.00407861	3	4	Down-regulated
Sus_scrofa___PRPF40B	-1.37501	4.75242	21.9885	8.4332e-05	0.00408343	3	4	Down-regulated
Sus_scrofa___TMEM231	-1.62117	2.604	21.9708	8.49905e-05	0.00410431	3	4	Down-regulated
Sus_scrofa___COPS7B	-1.32816	4.31939	21.9171	8.60183e-05	0.0041395	3	4	Down-regulated
Sus_scrofa___COQ8A	-1.36945	7.79176	21.8794	8.69037e-05	0.00417485	3	4	Down-regulated
Sus_scrofa___IVD	-1.32886	5.22866	21.8517	8.75774e-05	0.00417973	3	4	Down-regulated
Papio_anubis_LARP7	-4.64536	-0.903501	20.184	8.90584e-05	0.00423425	3	4	Down-regulated
Papio_anubis_ARFGEF1	-4.23916	-0.456509	20.2591	9.23811e-05	0.00438469	3	4	Down-regulated
Papio_anubis_PBRM1	-4.0647	-1.36842	18.9224	9.46387e-05	0.00445365	3	4	Down-regulated
Papio_anubis_LUC7L3	-3.41863	-0.260539	20.5818	9.49629e-05	0.00445547	3	4	Down-regulated
Sus_scrofa___ANKRD16	-1.3177	3.80727	21.5294	9.58044e-05	0.00445547	3	4	Down-regulated
Sus_scrofa___ENSSSCG00000012879	-1.23074	4.2931	21.4763	9.72187e-05	0.00451161	3	4	Down-regulated
Sus_scrofa___AGL	-1.05377	8.2922	21.4278	9.85291e-05	0.00454867	3	4	Down-regulated
Sus_scrofa___CPT1B	-1.59493	7.21507	21.4241	9.86305e-05	0.00454867	3	4	Down-regulated
Papio_anubis_SNX2	-6.91569	-1.33139	20.3479	9.90855e-05	0.00456205	3	4	Down-regulated
Sus_scrofa___IGSF1	-1.94693	1.09011	21.3669	0.000100236	0.00459972	3	4	Down-regulated
Sus_scrofa___MICU1	-0.876576	7.41431	21.2361	0.000103963	0.00472376	3	4	Down-regulated
Papio_anubis_MEIS2	-2.63917	-0.535623	20.7953	0.000104302	0.00473138	3	4	Down-regulated
Sus_scrofa___BMP5	-1.90773	6.29731	21.2137	0.000104623	0.00473816	3	4	Down-regulated
Sus_scrofa___ENSSSCG00000047774	-2.76801	-0.47697	20.2978	0.000106205	0.00478633	3	4	Down-regulated
Papio_anubis_RAPGEF6	-4.60859	-1.64383	19.3545	0.000106666	0.00479927	3	4	Down-regulated
Sus_scrofa___MAVS	-1.18227	7.17777	21.0779	0.000108694	0.00488258	3	4	Down-regulated
Papio_anubis_FCHSD2	-5.18731	-1.40153	18.9463	0.000111069	0.00495111	3	4	Down-regulated
Papio_anubis_WDR82	-5.60875	-1.81536	19.2993	0.000112074	0.00495199	3	4	Down-regulated
Sus_scrofa___PLEKHM3	-1.27895	8.30939	20.9633	0.000112265	0.00495199	3	4	Down-regulated
Sus_scrofa___ENSSSCG00000032029	-1.75064	6.51419	20.9595	0.000112386	0.00495199	3	4	Down-regulated
Sus_scrofa___DIPK1A	-1.07143	7.40643	20.8768	0.000115047	0.00501642	3	4	Down-regulated
Papio_anubis_NCOR1	-4.15009	-0.30941	19.786	0.000115391	0.00501642	3	4	Down-regulated
Sus_scrofa___ANO8	-1.63706	3.42918	20.8558	0.000115807	0.00501642	3	4	Down-regulated
Sus_scrofa___PTPRS	-1.7752	3.77678	20.8536	0.000115843	0.00501642	3	4	Down-regulated
Sus_scrofa___IFTAP	-1.25238	5.49912	20.8148	0.000117088	0.00506239	3	4	Down-regulated
Sus_scrofa___PLCL1	-1.49798	8.47119	20.7691	0.000118612	0.00510438	3	4	Down-regulated
Sus_scrofa___ENSSSCG00000041142	-2.28309	1.39252	20.7309	0.000118879	0.0051079	3	4	Down-regulated
Sus_scrofa___TSPAN11	-2.01099	2.17638	20.6778	0.000122454	0.00519646	3	4	Down-regulated
Sus_scrofa___PHACTR3	-2.94278	1.7869	20.6094	0.000124797	0.0052481	3	4	Down-regulated
Sus_scrofa___RORA	-1.32141	9.4309	20.5831	0.000125058	0.00525109	3	4	Down-regulated
Sus_scrofa___ENSSSCG00000039004	-0.833294	5.14488	20.5723	0.000125449	0.00525954	3	4	Down-regulated
Sus_scrofa___CYC1	-1.38697	5.15713	20.5293	0.000126999	0.00530843	3	4	Down-regulated
Sus_scrofa___HNMT	-3.24431	2.19404	20.5227	0.000129064	0.00535432	3	4	Down-regulated
Sus_scrofa___RAPGEF4	-1.55091	8.27445	20.461	0.000129495	0.00536416	3	4	Down-regulated
Sus_scrofa___TPGS1	-1.75572	3.28847	20.4204	0.000131097	0.00540626	3	4	Down-regulated
Sus_scrofa___ZNF436	-1.55564	2.38616	20.3978	0.000132155	0.00543996	3	4	Down-regulated
Papio_anubis_UBE2W	-4.63456	-1.49081	18.6567	0.000134918	0.00551449	3	4	Down-regulated
Sus_scrofa___KCND3	-2.27059	5.45611	20.2982	0.000135699	0.00553414	3	4	Down-regulated
Papio_anubis_MKLN1	-5.77457	-2.30027	25.0593	0.000138033	0.00560868	3	4	Down-regulated
Sus_scrofa___MSRB2	-1.03436	5.3393	20.2112	0.000139113	0.00562775	3	4	Down-regulated
Sus_scrofa___SEMA6C	-1.90245	2.45091	20.2022	0.000139796	0.00564714	3	4	Down-regulated
Sus_scrofa___AARS2	-1.53977	3.15622	20.1652	0.000141066	0.0056736	3	4	Down-regulated
Sus_scrofa___SIAE	-0.999747	5.10109	20.1346	0.000142216	0.00569561	3	4	Down-regulated
Sus_scrofa___DLX1	-2.85153	-1.12587	18.8707	0.000143125	0.00571915	3	4	Down-regulated
Sus_scrofa___PEBP4	-1.77945	2.9793	20.1098	0.000143439	0.00571915	3	4	Down-regulated
Sus_scrofa___STRBP	-1.06615	6.74845	20.0694	0.000144912	0.00573789	3	4	Down-regulated
Papio_anubis_CEP170	-6.76443	-1.85882	18.9023	0.000145811	0.0057557	3	4	Down-regulated
Sus_scrofa___COX7A2L	-1.11483	4.89076	19.9215	0.000151252	0.00593657	3	4	Down-regulated
Papio_anubis_PALM2AKAP2	-6.50768	-2.1606	20.4035	0.000155254	0.00603057	3	4	Down-regulated
Sus_scrofa___ENSSSCG00000045703	-4.3914	0.837703	19.4692	0.000155257	0.00603057	3	4	Down-regulated
Sus_scrofa___CXADR	-1.17286	6.29207	19.8282	0.00015539	0.00603057	3	4	Down-regulated
Papio_anubis_RASA2	-6.27914	-1.9687	21.3099	0.000156975	0.00607659	3	4	Down-regulated
Papio_anubis_FRA10AC1	-6.8113	-1.80796	19.0086	0.0001571	0.00607659	3	4	Down-regulated
Sus_scrofa___KIF26B	-2.02291	10.6779	19.7874	0.000157241	0.00607659	3	4	Down-regulated
Papio_anubis_UBR3	-7.56178	-0.477219	19.5655	0.000157454	0.00607659	3	4	Down-regulated
Sus_scrofa___OTUD3	-0.954802	4.21197	19.7726	0.000157942	0.00608691	3	4	Down-regulated
Sus_scrofa___HTR4	-1.56048	5.19349	19.7236	0.000160192	0.00615649	3	4	Down-regulated
Papio_anubis_DCP2	-2.93019	0.493305	19.6421	0.000163182	0.00622816	3	4	Down-regulated
Sus_scrofa___NREP	-3.19047	6.59458	19.6501	0.000163658	0.00622912	3	4	Down-regulated
Papio_anubis_TMEM131	-6.77726	-1.71096	18.5121	0.000165412	0.00627001	3	4	Down-regulated
Papio_anubis_RBM26	-3.41481	0.0747629	18.8514	0.000168913	0.00636782	3	4	Down-regulated
Sus_scrofa___CORIN	-1.80933	9.76862	19.5214	0.000169921	0.00638073	3	4	Down-regulated
Papio_anubis_CCT5	-6.29226	-2.33508	26.9159	0.000170162	0.00638073	3	4	Down-regulated
Sus_scrofa___TPRA1	-1.2609	3.10483	19.519	0.000170178	0.00638073	3	4	Down-regulated
Papio_anubis_TMEFF1	-2.84497	-1.12491	18.3137	0.000171015	0.00640347	3	4	Down-regulated
Sus_scrofa___CZIB	-1.29031	3.37982	19.4939	0.000171365	0.00640791	3	4	Down-regulated
Papio_anubis_RAB14	-6.537	-1.53148	18.9463	0.000171698	0.00641169	3	4	Down-regulated
Sus_scrofa___PPP1R9A	-0.966313	8.64481	19.4565	0.000173179	0.00645826	3	4	Down-regulated
Sus_scrofa___DNAJC5G	-2.13462	0.00165027	19.1859	0.0001746	0.00650249	3	4	Down-regulated
Sus_scrofa___SCN4A	-1.79371	0.492446	19.3857	0.000177852	0.00657934	3	4	Down-regulated
Papio_anubis_SMG1	-7.25936	-0.826712	18.8615	0.000179754	0.00663197	3	4	Down-regulated
Papio_anubis_RAPGEF2	-6.0588	-2.07393	17.8886	0.000183025	0.0066775	3	4	Down-regulated
Papio_anubis_CEP350	-6.59949	-1.5397	17.5975	0.00018316	0.0066775	3	4	Down-regulated
Sus_scrofa___PTPRK	-1.26607	9.9215	19.2343	0.000184859	0.00670412	3	4	Down-regulated
Sus_scrofa___INSC	-1.84326	3.84529	19.2152	0.000186038	0.00672089	3	4	Down-regulated
Sus_scrofa___ZNF362	-1.13168	4.8195	19.2083	0.000186293	0.00672089	3	4	Down-regulated
Sus_scrofa___ENSSSCG00000047248	-2.7961	-1.6636	17.205	0.00019177	0.00687627	3	4	Down-regulated
Sus_scrofa___INPP5E	-1.35539	2.66312	19.0551	0.000195142	0.00696746	3	4	Down-regulated
Sus_scrofa___RAPGEF3	-2.11742	0.127752	18.8436	0.000197746	0.00701792	3	4	Down-regulated
Sus_scrofa___RASL12	-3.04796	1.12849	18.998	0.000199433	0.0070479	3	4	Down-regulated
Sus_scrofa___USP22	-0.937558	4.45903	18.8736	0.000205703	0.00718687	3	4	Down-regulated
Sus_scrofa___TEX9	-1.36805	6.00039	18.8569	0.000206707	0.00719472	3	4	Down-regulated
Sus_scrofa___ENSSSCG00000039089	-1.70623	3.53071	18.8141	0.000209466	0.00727244	3	4	Down-regulated
Sus_scrofa___ENSSSCG00000004017	-3.56246	-1.75907	16.6647	0.000210915	0.00731357	3	4	Down-regulated
Sus_scrofa___IFT122	-1.19908	4.74595	18.7544	0.000213123	0.00735136	3	4	Down-regulated
Sus_scrofa___B3GNT8	-2.56381	2.251	18.7646	0.00021322	0.00735136	3	4	Down-regulated
Papio_anubis_ATAD2B	-4.63974	-0.759846	17.7672	0.000213518	0.00735136	3	4	Down-regulated
Sus_scrofa___ATXN1	-0.963526	9.51423	18.7433	0.000213821	0.00735136	3	4	Down-regulated
Papio_anubis_KAT7	-5.68977	-2.22587	17.7544	0.000215947	0.00740456	3	4	Down-regulated
Papio_anubis_OGT	-4.20346	-0.49386	17.8452	0.000217469	0.00743828	3	4	Down-regulated
Papio_anubis_SMAP1	-3.20416	-1.13517	17.9326	0.000218029	0.00744809	3	4	Down-regulated
Papio_anubis_TRIP12	-5.90188	-1.9944	22.0284	0.000218442	0.00744809	3	4	Down-regulated
Sus_scrofa___SMPD4	-0.920424	4.63862	18.5911	0.000223781	0.00758855	3	4	Down-regulated
Sus_scrofa___TSEN54	-1.64316	2.85306	18.5481	0.000226935	0.00765796	3	4	Down-regulated
Papio_anubis_PMPCB	-5.81466	-2.01035	16.7933	0.000229403	0.0077224	3	4	Down-regulated
Sus_scrofa___SMIM17	-2.17653	2.33399	18.5083	0.000230196	0.00773966	3	4	Down-regulated
Papio_anubis_PBX1	-3.92649	-0.697145	17.4709	0.000230916	0.00774288	3	4	Down-regulated
Papio_anubis_NAV2	-5.97156	-2.05587	16.6603	0.000231131	0.00774288	3	4	Down-regulated
Sus_scrofa___SOX6	-1.02338	10.3377	18.4274	0.000235028	0.00780728	3	4	Down-regulated
Sus_scrofa___GLRX5	-1.63303	5.04929	18.3839	0.00023813	0.00786313	3	4	Down-regulated
Papio_anubis_ITSN2	-4.60138	-1.59975	16.4632	0.000241118	0.00793209	3	4	Down-regulated
Sus_scrofa___TSR2	-1.23967	4.47643	18.3393	0.000241365	0.00793209	3	4	Down-regulated
Sus_scrofa___ARHGEF6	-0.932793	8.34933	18.3285	0.00024213	0.00793838	3	4	Down-regulated
Sus_scrofa___TNK2	-2.38668	5.24974	18.3103	0.000243478	0.00795427	3	4	Down-regulated
Sus_scrofa___ADGRL2	-1.05659	7.35739	18.2143	0.000250621	0.00813959	3	4	Down-regulated
Sus_scrofa___ANAPC2	-1.27483	3.0014	18.1881	0.000252784	0.00819063	3	4	Down-regulated
Sus_scrofa___SPATA20	-1.63157	1.93338	18.1639	0.000255312	0.00826286	3	4	Down-regulated
Papio_anubis_SRSF11	-1.76783	1.93195	18.1214	0.000258876	0.00836841	3	4	Down-regulated
Sus_scrofa___ENSSSCG00000046228	-2.83771	0.0907292	17.8922	0.00025928	0.00837169	3	4	Down-regulated
Papio_anubis_ANKRD13C	-4.32515	-1.91153	16.2729	0.0002605	0.0083915	3	4	Down-regulated
Papio_anubis_PPIL4	-3.53126	-0.709796	16.9675	0.000262987	0.0084154	3	4	Down-regulated
Sus_scrofa___CCDC115	-1.59046	1.85576	18.0605	0.000263568	0.0084154	3	4	Down-regulated
Sus_scrofa___TDP1	-1.4838	3.42448	18.0476	0.000263705	0.0084154	3	4	Down-regulated
Sus_scrofa___NELFCD	-0.952546	4.37955	18.0335	0.000264758	0.0084154	3	4	Down-regulated
Papio_anubis_ATF2	-3.92131	-0.755223	17.0744	0.000264768	0.0084154	3	4	Down-regulated
Sus_scrofa___CMYA5	-1.87155	5.37889	18.0013	0.000267342	0.00844477	3	4	Down-regulated
Papio_anubis_BIRC6	-4.97764	-1.27331	17.7649	0.000270828	0.008516	3	4	Down-regulated
Papio_anubis_ELF2	-5.64592	-1.99154	17.0789	0.000273694	0.00855774	3	4	Down-regulated
Sus_scrofa___CES1	-2.7558	2.90023	17.9331	0.000273702	0.00855774	3	4	Down-regulated
Papio_anubis_USP47	-4.09498	-0.847923	16.7633	0.000274846	0.00857569	3	4	Down-regulated
Papio_anubis_USP45	-6.56568	-1.69933	16.9108	0.000277921	0.0086336	3	4	Down-regulated
Sus_scrofa___CDH8	-2.09981	6.77736	17.8727	0.000278	0.0086336	3	4	Down-regulated
Sus_scrofa___RGSL1	-1.30809	4.84431	17.8371	0.00028105	0.00871362	3	4	Down-regulated
Sus_scrofa___FBXL4	-1.76548	4.64015	17.8354	0.000281206	0.00871362	3	4	Down-regulated
Sus_scrofa___ASB9	-3.27523	0.589237	17.4781	0.000283901	0.00877747	3	4	Down-regulated
Papio_anubis_AGO3	-5.91448	-2.00743	16.264	0.000284547	0.0087876	3	4	Down-regulated
Sus_scrofa___HHATL	-2.04618	-0.283824	17.4961	0.00028817	0.00886742	3	4	Down-regulated
Papio_anubis_STK38	-4.224	-2.18139	17.3913	0.00028833	0.00886742	3	4	Down-regulated
Papio_anubis_SAMD4A	-5.40208	-2.01337	16.8528	0.000288862	0.00887136	3	4	Down-regulated
Sus_scrofa___PLEKHH1	-0.826187	5.04278	17.6938	0.000293627	0.00894616	3	4	Down-regulated
Papio_anubis_TNRC6B	-4.68524	-1.49721	17.4776	0.000293704	0.00894616	3	4	Down-regulated
Papio_anubis_TRO	-2.15608	1.0682	17.7049	0.00029604	0.00899201	3	4	Down-regulated
Sus_scrofa___TRUB1	-1.28216	5.59608	17.6602	0.000296659	0.00900092	3	4	Down-regulated
Sus_scrofa___POMT1	-1.22259	4.52559	17.6456	0.000298016	0.00903221	3	4	Down-regulated
Sus_scrofa___NFYC	-0.873885	8.32458	17.585	0.00030358	0.00916248	3	4	Down-regulated
Sus_scrofa___PRKAG1	-1.10561	4.18629	17.5822	0.000303892	0.00916248	3	4	Down-regulated
Sus_scrofa___DPH7	-1.20815	3.62347	17.5744	0.000304661	0.00917331	3	4	Down-regulated
Sus_scrofa___SGMS1	-1.16721	9.33855	17.556	0.000306302	0.00921269	3	4	Down-regulated
Sus_scrofa___CIAO3	-1.32677	4.04397	17.5344	0.000308396	0.00926304	3	4	Down-regulated
Papio_anubis_UBE4A	-6.28214	-1.75568	16.5564	0.00031415	0.00937738	3	4	Down-regulated
Papio_anubis_MED13	-4.27685	-0.460351	16.2303	0.00031495	0.00939114	3	4	Down-regulated
Papio_anubis_RCOR3	-2.79707	-1.1085	16.164	0.00031806	0.00942296	3	4	Down-regulated
Papio_anubis_PUS10	-3.94539	-1.84386	16.2343	0.000322	0.00946872	3	4	Down-regulated
Papio_anubis_EMC2	-1.97877	1.69364	17.3967	0.000322432	0.00947135	3	4	Down-regulated
Papio_anubis_RNF207	-2.30303	-0.412197	17.0597	0.000324292	0.00950581	3	4	Down-regulated
Sus_scrofa___CPXM2	-1.75599	3.25706	17.3638	0.000325534	0.00953212	3	4	Down-regulated
Sus_scrofa___PLIN5	-2.84114	0.314836	17.1873	0.000328966	0.00960212	3	4	Down-regulated
Sus_scrofa___ENSSSCG00000037083	-2.68093	-0.958299	16.4375	0.000329339	0.00960248	3	4	Down-regulated
Sus_scrofa___SLC2A4RG	-2.05752	2.2885	17.3285	0.000329713	0.00960248	3	4	Down-regulated
Papio_anubis_RAB3GAP1	-3.74116	-1.10066	16.9971	0.000330306	0.00960248	3	4	Down-regulated
Papio_anubis_VPS54	-4.62235	-1.43543	15.6349	0.000330366	0.00960248	3	4	Down-regulated
Papio_anubis_SNX13	-4.62145	-1.73831	17.9118	0.000332246	0.00964699	3	4	Down-regulated
Sus_scrofa___ZNF438	-0.929327	7.96872	17.2677	0.000334794	0.00971079	3	4	Down-regulated
Papio_anubis_C2CD5	-7.69416	-0.511427	17.1398	0.000337299	0.00977044	3	4	Down-regulated
Papio_anubis_PTPN4	-2.37544	1.41603	17.2136	0.00034131	0.00986874	3	4	Down-regulated
Sus_scrofa___CWC27	-0.832384	7.64379	17.1988	0.000342023	0.00986983	3	4	Down-regulated
Sus_scrofa___B3GALNT1	-1.52538	4.81961	17.1769	0.000344377	0.00989538	3	4	Down-regulated
Papio_anubis_ANKRD17	-5.01995	0.932557	16.5334	0.000344847	0.00989862	3	4	Down-regulated
Papio_anubis_TEAD1	-5.11034	-2.28901	16.6089	0.000348563	0.0099949	3	4	Down-regulated
Sus_scrofa___ASNS	-1.48677	6.33959	17.1039	0.000352255	0.0100903	3	4	Down-regulated
Papio_anubis_SPTBN1	-3.26916	1.27866	17.1081	0.000355491	0.0101628	3	4	Down-regulated
Sus_scrofa___TXNDC16	-1.15551	7.24366	17.0742	0.000355521	0.0101628	3	4	Down-regulated
Sus_scrofa___TPK1	-0.926491	8.36466	17.0448	0.000358793	0.0102458	3	4	Down-regulated
Papio_anubis_KIF1B	-6.5786	-1.52585	15.9847	0.00035985	0.0102548	3	4	Down-regulated
Sus_scrofa___PTDSS1	-0.919636	8.28162	17.0113	0.000362554	0.0103106	3	4	Down-regulated
Sus_scrofa___ZNF235	-1.5614	3.29456	16.9909	0.000365101	0.0103674	3	4	Down-regulated
Papio_anubis_PLD1	-4.00847	-1.91225	15.4056	0.00036598	0.0103674	3	4	Down-regulated
Papio_anubis_CHN1	-2.61137	-0.473947	16.5456	0.000366824	0.0103674	3	4	Down-regulated
Sus_scrofa___GOLIM4	-1.08171	6.5918	16.9682	0.000367471	0.0103674	3	4	Down-regulated
Sus_scrofa___AIG1	-1.51712	6.17576	16.9642	0.000367935	0.0103674	3	4	Down-regulated
Sus_scrofa___COX10	-0.887864	6.58997	16.9635	0.000368008	0.0103674	3	4	Down-regulated
Papio_anubis_TRUB1	-2.63849	-1.26124	15.7945	0.000369521	0.0103879	3	4	Down-regulated
Papio_anubis_SLC38A6	-5.10441	-2.55304	15.8729	0.000369777	0.0103879	3	4	Down-regulated
Sus_scrofa___ENSSSCG00000051613	-3.83936	-2.38673	15.3931	0.000371632	0.0104189	3	4	Down-regulated
Papio_anubis_PHIP	-4.18637	-0.939636	16.3636	0.000373194	0.0104374	3	4	Down-regulated
Sus_scrofa___NUDT3	-0.747611	8.52357	16.8532	0.000380921	0.010551	3	4	Down-regulated
Sus_scrofa___RAB20	-1.47239	5.81159	16.842	0.000382266	0.0105777	3	4	Down-regulated
Papio_anubis_CUX1	-4.64052	-1.71551	15.1256	0.000385698	0.0106484	3	4	Down-regulated
Papio_anubis_TBL1XR1	-6.20676	-1.71533	15.5501	0.000390317	0.0107467	3	4	Down-regulated
Sus_scrofa___ZNF804B	-2.05902	9.21726	16.7539	0.000392964	0.0108089	3	4	Down-regulated
Papio_anubis_FBXW11	-6.69038	-0.958403	16.6851	0.000397238	0.0108939	3	4	Down-regulated
Sus_scrofa___TSC2	-1.41287	3.92493	16.7142	0.000397971	0.0108973	3	4	Down-regulated
Sus_scrofa___ENSSSCG00000042294	-1.82499	-0.452482	16.3105	0.000398474	0.0108973	3	4	Down-regulated
Papio_anubis_SKIC3	-6.01043	-2.0144	15.8097	0.000399031	0.0108999	3	4	Down-regulated
Sus_scrofa___PARP1	-1.90657	4.45183	16.6966	0.000400153	0.0109039	3	4	Down-regulated
Papio_anubis_PDS5A	-6.34012	-1.75483	17.2531	0.000402744	0.0109473	3	4	Down-regulated
Sus_scrofa___ASB5	-1.77159	4.1834	16.6686	0.000403717	0.010963	3	4	Down-regulated
Papio_anubis_RPRD2	-5.76118	-2.14801	17.0483	0.000405872	0.0110061	3	4	Down-regulated
Sus_scrofa___METTL6	-0.987859	3.41932	16.6501	0.000406123	0.0110061	3	4	Down-regulated
Papio_anubis_IREB2	-3.92012	-1.77657	15.2144	0.000406499	0.0110061	3	4	Down-regulated
Papio_anubis_SETD2	-4.38865	-1.75486	15.1138	0.000407164	0.0110133	3	4	Down-regulated
Papio_anubis_JMJD1C	-6.79916	-1.56536	15.9979	0.00040776	0.0110187	3	4	Down-regulated
Sus_scrofa___ISOC2	-1.24298	3.39686	16.5764	0.000415675	0.0111998	3	4	Down-regulated
Papio_anubis_CCDC191	-1.90835	0.372872	16.5184	0.000416179	0.0111999	3	4	Down-regulated
Sus_scrofa___ENSSSCG00000050454	-3.94398	-1.99841	15.0089	0.000416489	0.0111999	3	4	Down-regulated
Sus_scrofa___DYNC2I1	-1.01555	3.87388	16.5625	0.000417443	0.0112038	3	4	Down-regulated
Sus_scrofa___KIF13A	-0.764327	8.56182	16.5319	0.000421414	0.0112994	3	4	Down-regulated
Sus_scrofa___KY	-2.32416	3.42654	16.5312	0.000421863	0.0113005	3	4	Down-regulated
Sus_scrofa___TLN2	-1.23015	9.35071	16.5157	0.000423576	0.0113135	3	4	Down-regulated
Papio_anubis_MTMR3	-6.04527	-2.08904	16.1043	0.000425596	0.0113565	3	4	Down-regulated
Sus_scrofa___MYCBPAP	-1.76694	1.18035	16.4707	0.000433129	0.0115234	3	4	Down-regulated
Sus_scrofa___MPPED2	-1.07055	6.89224	16.4424	0.000433518	0.0115234	3	4	Down-regulated
Sus_scrofa___FBXO36	-1.05157	4.01285	16.4384	0.000434131	0.0115275	3	4	Down-regulated
Sus_scrofa___JADE1	-1.32712	8.41006	16.4292	0.000435337	0.0115275	3	4	Down-regulated
Papio_anubis_TNIK	-5.36552	-1.23591	15.2943	0.000438365	0.0115524	3	4	Down-regulated
Sus_scrofa___PPIF	-1.22167	4.24781	16.3993	0.000439529	0.0115689	3	4	Down-regulated
Papio_anubis_ENSPANG00000004585	-4.1608	0.31421	16.067	0.000439828	0.0115689	3	4	Down-regulated
Sus_scrofa___METTL25	-0.905271	6.74157	16.3926	0.000440405	0.0115731	3	4	Down-regulated
Sus_scrofa___PTDSS2	-1.03886	4.48479	16.3892	0.000440918	0.0115756	3	4	Down-regulated
Sus_scrofa___RXRG	-2.22491	5.74166	16.3776	0.000442526	0.0116061	3	4	Down-regulated
Sus_scrofa___PPM1L	-1.70531	7.12316	16.3747	0.000442921	0.0116061	3	4	Down-regulated
Sus_scrofa___DRC1	-1.96652	4.34705	16.3699	0.00044366	0.0116145	3	4	Down-regulated
Papio_anubis_GPATCH8	-2.31914	-0.789849	15.2527	0.000449924	0.0117341	3	4	Down-regulated
Sus_scrofa___SIRT5	-0.993957	4.99386	16.3005	0.000453487	0.011777	3	4	Down-regulated
Papio_anubis_ATP8A1	-7.40608	-1.18491	16.0579	0.000454233	0.011777	3	4	Down-regulated
Sus_scrofa___NEO1	-1.08499	6.99018	16.2943	0.00045437	0.011777	3	4	Down-regulated
Sus_scrofa___NADK2	-0.973585	4.78069	16.2623	0.000459034	0.011847	3	4	Down-regulated
Papio_anubis_BTAF1	-6.64592	-1.50101	15.0181	0.000459338	0.011847	3	4	Down-regulated
Papio_anubis_LCOR	-7.15978	-1.28005	15.5475	0.000462881	0.0119037	3	4	Down-regulated
Sus_scrofa___DNAL4	-0.964729	2.83957	16.2277	0.000464431	0.0119325	3	4	Down-regulated
Papio_anubis_PPP4R2	-3.19374	-1.44008	15.2645	0.000465246	0.0119423	3	4	Down-regulated
Sus_scrofa___ENSSSCG00000038605	-2.14329	3.24418	16.1622	0.000465987	0.0119503	3	4	Down-regulated
Papio_anubis_ATF7	-3.79054	-1.89357	14.8231	0.000467452	0.0119767	3	4	Down-regulated
Sus_scrofa___PRKAG3	-1.64556	4.2221	16.187	0.000470264	0.0120191	3	4	Down-regulated
Papio_anubis_UBE2R2	-3.22053	-0.896745	15.0857	0.00047068	0.0120191	3	4	Down-regulated
Papio_anubis_ETV1	-3.01991	-1.9993	15.1493	0.000471417	0.0120226	3	4	Down-regulated
Sus_scrofa___CES5A	-1.72213	1.48348	16.1823	0.000471868	0.0120231	3	4	Down-regulated
Sus_scrofa___IRS1	-1.31855	6.38849	16.171	0.000472554	0.0120295	3	4	Down-regulated
Papio_anubis_RICTOR	-4.1217	-0.77079	15.6164	0.000475624	0.0120735	3	4	Down-regulated
Papio_anubis_PHF3	-3.60089	-0.657946	15.5458	0.000477364	0.0120963	3	4	Down-regulated
Sus_scrofa___NSD1	-0.947689	7.49683	16.1355	0.000477939	0.0120998	3	4	Down-regulated
Sus_scrofa___DYRK2	-1.45987	4.23017	16.1163	0.000480932	0.0121533	3	4	Down-regulated
Sus_scrofa___CCDC122	-0.940516	5.85243	16.0598	0.000489645	0.0122949	3	4	Down-regulated
Sus_scrofa___PAG1	-1.11743	7.65402	16.0448	0.000492001	0.0123428	3	4	Down-regulated
Sus_scrofa___DHX32	-0.820579	4.56415	16.0367	0.000493317	0.0123646	3	4	Down-regulated
Papio_anubis_AUTS2	-5.99805	-2.20209	14.5923	0.000495798	0.012382	3	4	Down-regulated
Sus_scrofa___SYNRG	-1.0761	8.22974	16.0115	0.000497267	0.012391	3	4	Down-regulated
Papio_anubis_ENSPANG00000032917	-5.90405	-2.18557	15.5758	0.000497952	0.012391	3	4	Down-regulated
Sus_scrofa___WFIKKN1	-3.14369	-1.45039	14.7923	0.000504602	0.0125182	3	4	Down-regulated
Sus_scrofa___NSMF	-1.41661	3.83231	15.9617	0.000505405	0.0125202	3	4	Down-regulated
Sus_scrofa___CLCN1	-1.09794	3.9664	15.9455	0.000507972	0.0125613	3	4	Down-regulated
Sus_scrofa___QSOX2	-1.32464	3.39293	15.8798	0.0005189	0.0128095	3	4	Down-regulated
Sus_scrofa___VTCN1	-2.69431	4.91562	15.8281	0.000527503	0.0129472	3	4	Down-regulated
Sus_scrofa___OPLAH	-1.34043	4.47722	15.823	0.000528363	0.0129498	3	4	Down-regulated
Papio_anubis_TOP2B	-3.66289	-0.434701	15.1768	0.000531501	0.0129922	3	4	Down-regulated
Papio_anubis_SUPT20H	-3.27207	-0.0783344	15.2948	0.000534774	0.0130491	3	4	Down-regulated
Sus_scrofa___MANBA	-1.96796	4.66912	15.7531	0.000540399	0.0131748	3	4	Down-regulated
Papio_anubis_HNRNPA2B1	-4.67205	-0.298915	14.9944	0.000545122	0.0132433	3	4	Down-regulated
Sus_scrofa___SORT1	-1.02821	7.01544	15.7064	0.000548546	0.0132939	3	4	Down-regulated
Papio_anubis_KLHL24	-5.05393	-2.48177	14.6832	0.00054913	0.0132939	3	4	Down-regulated
Sus_scrofa___DBF4B	-1.42905	2.29485	15.6941	0.000551709	0.0133214	3	4	Down-regulated
Sus_scrofa___DALRD3	-1.0706	4.60385	15.659	0.000557048	0.0134269	3	4	Down-regulated
Papio_anubis_CCNT2	-4.96502	-2.5147	18.2831	0.000559283	0.0134398	3	4	Down-regulated
Sus_scrofa___SLC40A1	-2.16112	4.95074	15.6422	0.000560078	0.0134414	3	4	Down-regulated
Papio_anubis_ARMC8	-6.33316	-1.55487	15.6589	0.000561148	0.0134438	3	4	Down-regulated
Papio_anubis_MFN1	-5.85799	-2.15138	14.831	0.000566914	0.0135449	3	4	Down-regulated
Papio_anubis_NUP155	-5.03024	-2.50308	15.0335	0.00056767	0.0135449	3	4	Down-regulated
Sus_scrofa___MYOM3	-1.40587	7.23796	15.5852	0.000570486	0.0135968	3	4	Down-regulated
Papio_anubis_ATG5	-5.396	-2.59779	16.4931	0.000574264	0.0136516	3	4	Down-regulated
Sus_scrofa___FIGN	-1.13588	6.98504	15.5485	0.000577325	0.0137008	3	4	Down-regulated
Sus_scrofa___RIPOR3	-1.56467	2.48742	15.547	0.000578853	0.0137253	3	4	Down-regulated
Sus_scrofa___PGAP2	-1.02714	2.91543	15.5243	0.000582218	0.0137772	3	4	Down-regulated
Sus_scrofa___CERS4	-1.45994	5.93942	15.5146	0.000583698	0.0137909	3	4	Down-regulated
Sus_scrofa___HADH	-1.0899	6.6814	15.5123	0.00058414	0.0137909	3	4	Down-regulated
Sus_scrofa___MBD5	-0.890578	9.34285	15.5037	0.000585773	0.0137948	3	4	Down-regulated
Sus_scrofa___RIN2	-2.06828	7.17096	15.484	0.000589536	0.0138716	3	4	Down-regulated
Sus_scrofa___ACSL3	-1.07512	5.90616	15.466	0.000593004	0.0139295	3	4	Down-regulated
Papio_anubis_NEMF	-3.38078	-1.41729	14.4313	0.000607427	0.014208	3	4	Down-regulated
Sus_scrofa___ENSSSCG00000048674	-1.21614	6.57708	15.3805	0.000609735	0.014226	3	4	Down-regulated
Sus_scrofa___DCUN1D2	-1.23563	6.44939	15.3615	0.000613521	0.0142902	3	4	Down-regulated
Papio_anubis_PICALM	-5.41494	-2.11594	15.4318	0.000614931	0.0142989	3	4	Down-regulated
Sus_scrofa___TSPAN2	-2.01431	3.26502	15.2886	0.000628611	0.0145437	3	4	Down-regulated
Papio_anubis_ENSPANG00000010317	-6.04059	-1.81253	15.0781	0.000629749	0.0145579	3	4	Down-regulated
Sus_scrofa___ILKAP	-0.912407	5.96945	15.2718	0.000631752	0.0145825	3	4	Down-regulated
Sus_scrofa___CNKSR3	-0.995098	7.34922	15.2713	0.000631869	0.0145825	3	4	Down-regulated
Papio_anubis_ILRUN	-5.05208	-0.91868	14.7062	0.000642539	0.0147427	3	4	Down-regulated
Sus_scrofa___PDHA1	-0.934837	5.99616	15.2171	0.000643162	0.0147448	3	4	Down-regulated
Papio_anubis_CUL3	-3.15478	-1.0469	14.7792	0.000643758	0.0147462	3	4	Down-regulated
Papio_anubis_PPP2R5E	-3.27479	0.00202199	14.7274	0.000647525	0.014808	3	4	Down-regulated
Papio_anubis_GLG1	-5.97569	-1.91941	14.2679	0.000649339	0.0148127	3	4	Down-regulated
Sus_scrofa___ENSSSCG00000037344	-1.92669	0.211261	15.0606	0.000652062	0.0148504	3	4	Down-regulated
Sus_scrofa___ZNF532	-1.10026	7.21591	15.1593	0.000655455	0.0148944	3	4	Down-regulated
Sus_scrofa___ATG16L2	-1.33271	2.80426	15.159	0.00065646	0.0148944	3	4	Down-regulated
Sus_scrofa___R3HDM1	-0.838343	8.64969	15.1514	0.000657159	0.0148944	3	4	Down-regulated
Sus_scrofa___ENPP1	-1.46143	7.59257	15.1511	0.000657226	0.0148944	3	4	Down-regulated
Papio_anubis_MARK3	-4.66449	-1.32953	14.1241	0.000657907	0.0148977	3	4	Down-regulated
Sus_scrofa___MSH3	-1.2604	6.37933	15.1453	0.000658485	0.0148986	3	4	Down-regulated
Papio_anubis_RBM25	-5.81796	-1.57347	14.0168	0.000660566	0.0149334	3	4	Down-regulated
Sus_scrofa___CCNJL	-2.01862	0.696292	15.1307	0.000665417	0.0150073	3	4	Down-regulated
Papio_anubis_FCHO2	-4.81753	-1.54009	13.9086	0.000665462	0.0150073	3	4	Down-regulated
Papio_anubis_CBLB	-5.91598	-2.1173	13.8708	0.000669806	0.0150838	3	4	Down-regulated
Sus_scrofa___ASXL3	-1.16636	6.86354	15.0927	0.000669944	0.0150838	3	4	Down-regulated
Papio_anubis_TNPO1	-3.37311	-1.63479	13.553	0.000680983	0.0152455	3	4	Down-regulated
Papio_anubis_ATRN	-5.68161	-2.03804	13.778	0.00068327	0.015272	3	4	Down-regulated
Sus_scrofa___KLC4	-1.05911	4.14866	15.0119	0.000688077	0.0153407	3	4	Down-regulated
Sus_scrofa___ENSSSCG00000033232	-1.00198	3.49434	15.0104	0.0006885	0.0153407	3	4	Down-regulated
Sus_scrofa___NCEH1	-1.31521	9.21334	15.0094	0.000688561	0.0153407	3	4	Down-regulated
Papio_anubis_EPC1	-2.82955	0.5608	14.7999	0.000695585	0.0154532	3	4	Down-regulated
Sus_scrofa___ENSSSCG00000039331	-1.75251	4.91355	14.9703	0.00069754	0.0154785	3	4	Down-regulated
Sus_scrofa___ENSSSCG00000003076	-1.01635	3.04662	14.9612	0.000699942	0.0155193	3	4	Down-regulated
Papio_anubis_TTC14	-2.50794	-0.944664	13.9504	0.00070187	0.0155271	3	4	Down-regulated
Sus_scrofa___AIFM3	-3.6853	-2.0013	13.4414	0.000703082	0.0155271	3	4	Down-regulated
Sus_scrofa___ENSSSCG00000043379	-4.08193	-1.95906	14.2749	0.00070408	0.0155364	3	4	Down-regulated
Sus_scrofa___LAMB2	-1.53243	4.36906	14.9325	0.00070637	0.0155745	3	4	Down-regulated
Sus_scrofa___DDX17	-0.736303	8.96	14.9233	0.000708401	0.0156068	3	4	Down-regulated
Sus_scrofa___RPS6KA5	-1.34952	7.66684	14.9133	0.000710744	0.0156458	3	4	Down-regulated
Sus_scrofa___THRB	-0.951809	10.4535	14.9109	0.000711299	0.0156458	3	4	Down-regulated
Papio_anubis_PTPRK	-4.03489	-2.00076	14.0172	0.000715054	0.0157034	3	4	Down-regulated
Sus_scrofa___ENSSSCG00000031964	-3.24635	-0.743965	13.7285	0.000728775	0.0159541	3	4	Down-regulated
Sus_scrofa___SHISA2	-4.51189	-1.02082	14.0881	0.00072954	0.0159582	3	4	Down-regulated
Sus_scrofa___GPX8	-0.991757	3.50287	14.8086	0.000735983	0.0160771	3	4	Down-regulated
Sus_scrofa___ENSSSCG00000047979	-5.09249	-2.44959	13.4315	0.000742038	0.0161677	3	4	Down-regulated
Sus_scrofa___RINT1	-0.776692	5.3148	14.7792	0.000743007	0.016176	3	4	Down-regulated
Sus_scrofa___CAMK2D	-1.02256	11.7778	14.7736	0.000744367	0.0161802	3	4	Down-regulated
Sus_scrofa___SGPL1	-1.18679	5.86312	14.7672	0.000745941	0.0162017	3	4	Down-regulated
Sus_scrofa___SPTAN1	-1.37709	7.70017	14.7594	0.000747889	0.0162205	3	4	Down-regulated
Sus_scrofa___IGDCC4	-1.37671	2.31298	14.7648	0.000747981	0.0162205	3	4	Down-regulated
Sus_scrofa___ENSSSCG00000037995	-1.93944	1.25352	14.7607	0.000751946	0.0162791	3	4	Down-regulated
Sus_scrofa___TYK2	-0.768962	5.28922	14.7388	0.000753034	0.0162791	3	4	Down-regulated
Sus_scrofa___RAPGEF2	-1.01065	9.47744	14.7352	0.000753919	0.0162855	3	4	Down-regulated
Sus_scrofa___NSL1	-0.992994	4.28955	14.7115	0.000759926	0.0163769	3	4	Down-regulated
Sus_scrofa___PTPRU	-1.11818	4.80856	14.7022	0.000762254	0.016394	3	4	Down-regulated
Sus_scrofa___CTU2	-1.09115	2.77766	14.7036	0.000762462	0.016394	3	4	Down-regulated
Sus_scrofa___FDXR	-1.68957	1.23388	14.704	0.0007667	0.0164588	3	4	Down-regulated
Sus_scrofa___ENSSSCG00000004008	-1.29312	4.11717	14.6656	0.000771625	0.0165388	3	4	Down-regulated
Sus_scrofa___ENSSSCG00000043280	-2.51631	2.15462	14.6615	0.000775139	0.0165756	3	4	Down-regulated
Papio_anubis_SUZ12	-2.72954	-0.756003	14.024	0.000783237	0.0167101	3	4	Down-regulated
Sus_scrofa___DNASE1	-0.972327	4.86171	14.6089	0.000786279	0.016762	3	4	Down-regulated
Papio_anubis_HUWE1	-3.38779	-0.129221	14.1162	0.000788336	0.0167929	3	4	Down-regulated
Sus_scrofa___ENSSSCG00000035655	-2.69441	1.89542	14.6039	0.00078914	0.0167971	3	4	Down-regulated
Sus_scrofa___SYDE2	-1.105	4.86665	14.5921	0.000790689	0.0168095	3	4	Down-regulated
Papio_anubis_FNDC3A	-6.10198	-1.96551	13.5788	0.000790937	0.0168095	3	4	Down-regulated
Sus_scrofa___NTHL1	-1.41315	1.99238	14.5953	0.000792339	0.0168264	3	4	Down-regulated
Sus_scrofa___TTLL6	-1.67241	1.21249	14.5979	0.000793904	0.0168467	3	4	Down-regulated
Sus_scrofa___MBTD1	-0.702298	7.40766	14.5643	0.00079802	0.0169081	3	4	Down-regulated
Papio_anubis_LUC7L2	-4.01016	-1.13596	13.5007	0.000798946	0.0169116	3	4	Down-regulated
Sus_scrofa___KCNIP2	-2.29515	5.3279	14.5585	0.000799733	0.0169116	3	4	Down-regulated
Papio_anubis_HELZ	-2.9141	-0.932235	13.8858	0.000800427	0.0169116	3	4	Down-regulated
Sus_scrofa___ELP1	-0.735101	5.46159	14.5546	0.000800631	0.0169116	3	4	Down-regulated
Sus_scrofa___STK33	-1.24245	2.64571	14.4909	0.000818631	0.0172113	3	4	Down-regulated
Sus_scrofa___MCFD2	-1.33268	4.98998	14.4833	0.000819943	0.0172113	3	4	Down-regulated
Sus_scrofa___ENSSSCG00000027725	-1.02855	10.9319	14.4814	0.000820442	0.0172113	3	4	Down-regulated
Sus_scrofa___STK11IP	-1.55916	1.37821	14.4812	0.000824764	0.0172502	3	4	Down-regulated
Sus_scrofa___SMIM5	-1.59239	4.52292	14.4561	0.000827476	0.0172728	3	4	Down-regulated
Sus_scrofa___TMEM170A	-0.911467	3.76287	14.4465	0.000830225	0.0172728	3	4	Down-regulated
Sus_scrofa___U2AF1L4	-1.30823	2.39918	14.4381	0.000833982	0.017306	3	4	Down-regulated
Sus_scrofa___SMC6	-0.884529	5.94757	14.4313	0.000834309	0.017306	3	4	Down-regulated
Sus_scrofa___ENSSSCG00000038717	-0.843037	7.1596	14.4024	0.000842417	0.0173755	3	4	Down-regulated
Papio_anubis_CLINT1	-2.75939	0.450461	14.1077	0.00084331	0.0173755	3	4	Down-regulated
Sus_scrofa___SPNS3	-1.46471	1.05035	14.4178	0.000845472	0.0174042	3	4	Down-regulated
Papio_anubis_GLS	-3.16386	0.356035	14.0649	0.000849591	0.0174658	3	4	Down-regulated
Sus_scrofa___SEMA4C	-1.32767	1.52393	14.3535	0.000855868	0.0175301	3	4	Down-regulated
Sus_scrofa___ENSSSCG00000027557	-0.801726	7.68926	14.3476	0.000858052	0.0175615	3	4	Down-regulated
Papio_anubis_RALGAPA1	-3.45157	-1.66954	13.1071	0.0008611	0.0176109	3	4	Down-regulated
Sus_scrofa___PALM2AKAP2	-1.05704	9.79387	14.3161	0.000867159	0.0176863	3	4	Down-regulated
Sus_scrofa___PPP1R13B	-0.932976	8.76761	14.3155	0.000867345	0.0176863	3	4	Down-regulated
Sus_scrofa___DUSP22	-1.10093	5.44765	14.3001	0.000871864	0.0177335	3	4	Down-regulated
Papio_anubis_PDE4D	-6.25758	-1.51513	13.7868	0.000880861	0.0178175	3	4	Down-regulated
Sus_scrofa___STXBP6	-1.4785	8.19703	14.2571	0.000884542	0.0178658	3	4	Down-regulated
Sus_scrofa___CLASP2	-0.978643	7.41198	14.2457	0.000887955	0.0179086	3	4	Down-regulated
Sus_scrofa___GABRB1	-1.27731	8.51324	14.2425	0.000888907	0.0179148	3	4	Down-regulated
Papio_anubis_UVRAG	-3.83484	-2.16327	14.5537	0.000889749	0.0179186	3	4	Down-regulated
Sus_scrofa___TRAF3IP1	-0.998122	3.81841	14.222	0.000895185	0.0180019	3	4	Down-regulated
Sus_scrofa___PLA2G7	-1.30298	8.0518	14.219	0.000895962	0.0180045	3	4	Down-regulated
Papio_anubis_ZMYM4	-3.09057	-1.43529	13.2372	0.000898794	0.0180359	3	4	Down-regulated
Sus_scrofa___PATZ1	-1.26883	2.20596	14.2141	0.000898832	0.0180359	3	4	Down-regulated
Papio_anubis_SCFD1	-5.89303	-2.16434	13.5043	0.000901838	0.0180701	3	4	Down-regulated
Papio_anubis_ZC3H14	-5.22261	-2.26067	13.0727	0.00091124	0.018232	3	4	Down-regulated
Sus_scrofa___MSANTD3-TMEFF1	-1.00913	5.68444	14.1591	0.000914254	0.0182528	3	4	Down-regulated
Sus_scrofa___PHF19	-1.56712	3.88428	14.1454	0.000918715	0.0183213	3	4	Down-regulated
Sus_scrofa___ENSSSCG00000041764	-0.920559	8.14634	14.139	0.000920478	0.0183373	3	4	Down-regulated
Sus_scrofa___HDC	-3.66409	-1.89928	12.7507	0.000929719	0.0184418	3	4	Down-regulated
Papio_anubis_PPP4R3B	-6.40481	-1.18157	13.8896	0.000944267	0.0186768	3	4	Down-regulated
Sus_scrofa___MBOAT2	-1.17694	6.29292	14.0504	0.000948487	0.0187468	3	4	Down-regulated
Sus_scrofa___ENSSSCG00000002877	-0.964927	5.91497	14.0382	0.000952392	0.0187972	3	4	Down-regulated
Papio_anubis_ALG13	-3.44923	-2.02673	12.8796	0.000953143	0.0187986	3	4	Down-regulated
Sus_scrofa___FN3K	-1.45996	3.45359	14.013	0.000960809	0.0188959	3	4	Down-regulated
Papio_anubis_NPHP3	-5.24066	-2.66316	14.2544	0.000972169	0.0190651	3	4	Down-regulated
Papio_anubis_POLB	-3.60511	-2.4753	13.5713	0.000972982	0.0190675	3	4	Down-regulated
Sus_scrofa___KCTD1	-1.08606	6.89854	13.972	0.000974016	0.0190714	3	4	Down-regulated
Papio_anubis_YWHAE	-5.10733	-1.27506	13.2004	0.000974557	0.0190714	3	4	Down-regulated
Sus_scrofa___CAST	-0.969291	9.30239	13.9346	0.00098645	0.0192429	3	4	Down-regulated
Sus_scrofa___PRLR	-2.77704	5.66786	13.9149	0.000993118	0.0193178	3	4	Down-regulated
Papio_anubis_NIPBL	-3.20863	1.10261	13.9063	0.000993431	0.0193178	3	4	Down-regulated
Sus_scrofa___SLC41A1	-1.0383	7.38703	13.9075	0.000995587	0.019339	3	4	Down-regulated
Sus_scrofa___ENSSSCG00000001517	-1.98085	-0.690738	13.7058	0.000995918	0.019339	3	4	Down-regulated
Sus_scrofa___SYN1	-1.23994	3.14703	13.9015	0.000998049	0.0193532	3	4	Down-regulated
Papio_anubis_NPEPPS	-4.53337	-0.820539	13.8912	0.00100139	0.0194045	3	4	Down-regulated
Sus_scrofa___CUL7	-1.24149	1.72134	13.892	0.00100452	0.0194379	3	4	Down-regulated
Sus_scrofa___CAMK2G	-1.39967	5.49844	13.8641	0.00101041	0.0195215	3	4	Down-regulated
Sus_scrofa___PXYLP1	-1.40867	6.49463	13.8485	0.00101579	0.0195874	3	4	Down-regulated
Sus_scrofa___RAP2C	-1.16094	4.52654	13.8427	0.00101786	0.0196137	3	4	Down-regulated
Sus_scrofa___TTN	-0.926499	14.6286	13.8314	0.00102171	0.0196605	3	4	Down-regulated
Sus_scrofa___DENND2B	-1.36609	5.16395	13.8047	0.00103109	0.0197997	3	4	Down-regulated
Sus_scrofa___CREBBP	-0.78887	7.62679	13.784	0.00103837	0.0198551	3	4	Down-regulated
Sus_scrofa___ENSSSCG00000039368	-1.02255	6.36845	13.7654	0.00104499	0.019942	3	4	Down-regulated
Sus_scrofa___ENSSSCG00000032969	-0.749123	4.49882	13.7583	0.00104759	0.0199544	3	4	Down-regulated
Sus_scrofa___ENSSSCG00000037808	-1.25366	3.09275	13.7502	0.00105084	0.0199848	3	4	Down-regulated
Sus_scrofa___ENSSSCG00000050756	-3.1091	-1.91919	12.6619	0.00105579	0.0200513	3	4	Down-regulated
Sus_scrofa___MAGIX	-1.31383	3.33678	13.7294	0.00105829	0.0200729	3	4	Down-regulated
Papio_anubis_AGFG1	-5.40951	-2.30722	14.3652	0.00105838	0.0200729	3	4	Down-regulated
Sus_scrofa___VARS2	-1.18565	4.42598	13.7172	0.00106241	0.020108	3	4	Down-regulated
Sus_scrofa___ATP8A1	-1.20927	8.47327	13.7078	0.00106576	0.0201302	3	4	Down-regulated
Papio_anubis_TP53BP1	-5.36173	-2.49115	12.9481	0.00106921	0.0201814	3	4	Down-regulated
Sus_scrofa___LRRC24	-1.61914	2.80112	13.6796	0.00107698	0.0203005	3	4	Down-regulated
Sus_scrofa___ATXN10	-0.716289	7.06317	13.6651	0.00108144	0.0203569	3	4	Down-regulated
Papio_anubis_AFG1L	-4.12452	-2.04695	13.0487	0.00108518	0.0204049	3	4	Down-regulated
Sus_scrofa___FITM2	-1.25997	4.21744	13.6545	0.00108547	0.0204049	3	4	Down-regulated
Sus_scrofa___MAPK12	-1.07353	5.30443	13.6511	0.00108667	0.0204132	3	4	Down-regulated
Sus_scrofa___CDK5RAP2	-1.07136	4.91844	13.6492	0.00108739	0.0204132	3	4	Down-regulated
Sus_scrofa___TMEM266	-1.72802	5.73622	13.6435	0.00108951	0.02042	3	4	Down-regulated
Sus_scrofa___NRG4	-1.19174	6.93096	13.6386	0.00109131	0.0204314	3	4	Down-regulated
Sus_scrofa___LHPP	-0.985677	5.56664	13.6354	0.00109253	0.0204405	3	4	Down-regulated
[truncated: 574 more rows]

## Sheet: Endocardial lymphatic EC
Gene	logFC	logCPM	F	PValue	FDR	Observations_Extended	Observations_Control	level
Sus_scrofa___hCD46	8.36145	7.84814	90.1034	1.96952e-10	3.10633e-06	3	4	Up-regulated
Sus_scrofa___ENO1	4.16	7.24279	55.795	1.29023e-08	6.78319e-05	3	4	Up-regulated
Sus_scrofa___SNAPC1	3.4467	7.01316	46.9257	8.58368e-08	0.000338454	3	4	Up-regulated
Sus_scrofa___SERPINE1	5.2166	9.08487	42.4071	1.82353e-07	0.000575215	3	4	Up-regulated
Sus_scrofa___GBE1	3.12013	7.74915	40.1733	4.00983e-07	0.000695601	3	4	Up-regulated
Sus_scrofa___HK2	8.43129	6.05189	38.7603	4.18534e-07	0.000695601	3	4	Up-regulated
Sus_scrofa___BNIP3	3.69593	6.70438	38.9355	4.32886e-07	0.000695601	3	4	Up-regulated
Sus_scrofa___IRS2	5.69466	5.40192	34.6053	4.55185e-07	0.000695601	3	4	Up-regulated
Sus_scrofa___ITGA1	3.39752	9.04304	38.9027	5.29242e-07	0.000695601	3	4	Up-regulated
Sus_scrofa___STXBP5L	7.96623	5.16234	36.0528	7.02382e-07	0.000852152	3	4	Up-regulated
Sus_scrofa___ENSSSCG00000029160	4.63457	7.28319	30.9808	1.50711e-06	0.00132056	3	4	Up-regulated
Sus_scrofa___HIF1A	2.86805	8.5029	34.2252	1.6337e-06	0.00135614	3	4	Up-regulated
Sus_scrofa___HK1	2.34155	7.88606	33.9461	1.76387e-06	0.00139099	3	4	Up-regulated
Sus_scrofa___OASL	7.22127	4.82242	35.8725	1.98546e-06	0.00148285	3	4	Up-regulated
Sus_scrofa___HERC5	3.99465	7.46324	32.2251	2.46582e-06	0.00169091	3	4	Up-regulated
Sus_scrofa___PLEKHA7	4.02595	5.62233	30.3428	2.68268e-06	0.00176297	3	4	Up-regulated
Sus_scrofa___GJC1	3.1499	6.3426	30.7077	3.56058e-06	0.00216135	3	4	Up-regulated
Sus_scrofa___HOMER1	4.39992	6.92898	28.7328	4.19736e-06	0.00216135	3	4	Up-regulated
Sus_scrofa___DDX60	5.3095	6.35358	28.1419	5.26528e-06	0.00259513	3	4	Up-regulated
Sus_scrofa___TFRC	7.05954	5.02285	27.2515	7.00028e-06	0.00324731	3	4	Up-regulated
Sus_scrofa___ENSSSCG00000034570	5.84405	7.89682	27.3229	7.6411e-06	0.0034433	3	4	Up-regulated
Sus_scrofa___TSC22D2	3.55759	7.16091	27.8585	8.56376e-06	0.00346601	3	4	Up-regulated
Sus_scrofa___IER3	5.30179	6.12632	27.3244	8.8624e-06	0.00346601	3	4	Up-regulated
Sus_scrofa___MYLK	3.78013	7.22831	27.4324	9.10622e-06	0.00346601	3	4	Up-regulated
Sus_scrofa___ISG15	5.51437	7.3839	26.1729	9.29057e-06	0.00346601	3	4	Up-regulated
Sus_scrofa___FBXO30	4.01905	5.74333	26.0135	9.29533e-06	0.00346601	3	4	Up-regulated
Sus_scrofa___MAP7	5.08943	5.09439	25.2037	9.422e-06	0.00346601	3	4	Up-regulated
Sus_scrofa___KCNQ1	4.64076	5.20887	25.5931	9.98865e-06	0.00350091	3	4	Up-regulated
Sus_scrofa___EXOSC5	5.99708	5.14659	26.3516	1.05032e-05	0.00360122	3	4	Up-regulated
Sus_scrofa___ENSSSCG00000043835	3.23325	6.89095	26.8021	1.12201e-05	0.00368674	3	4	Up-regulated
Sus_scrofa___SLC20A2	2.78876	7.30978	26.6261	1.20757e-05	0.00377038	3	4	Up-regulated
Sus_scrofa___VEGFA	4.90871	5.08853	24.1216	1.23681e-05	0.00377038	3	4	Up-regulated
Sus_scrofa___ENSSSCG00000017754	3.10548	6.4047	25.84	1.29993e-05	0.00384181	3	4	Up-regulated
Sus_scrofa___PLAUR	3.32826	6.62448	25.6721	1.33314e-05	0.00384181	3	4	Up-regulated
Sus_scrofa___AMD1	4.15119	6.11013	24.8425	1.4821e-05	0.00417027	3	4	Up-regulated
Sus_scrofa___SLC22A3	5.06047	6.31202	24.8638	1.50714e-05	0.00417027	3	4	Up-regulated
Sus_scrofa___BHLHE40	4.15622	5.32368	22.708	2.47317e-05	0.00630827	3	4	Up-regulated
Sus_scrofa___NCBP1	3.14705	6.67247	24.0063	2.49627e-05	0.00630827	3	4	Up-regulated
Sus_scrofa___ZBP1	3.71239	5.58907	22.368	2.63613e-05	0.00639648	3	4	Up-regulated
Sus_scrofa___OAS2	4.40757	8.31179	23.4175	3.08824e-05	0.0070591	3	4	Up-regulated
Sus_scrofa___MX2	5.01923	8.43267	23.0588	3.29197e-05	0.00732161	3	4	Up-regulated
Sus_scrofa___TENM1	4.23756	5.0243	21.2784	3.34235e-05	0.00732161	3	4	Up-regulated
Sus_scrofa___MX1	4.19997	7.1734	22.5225	3.56917e-05	0.00771135	3	4	Up-regulated
Sus_scrofa___SYCP2	4.06064	6.72799	22.5707	3.71825e-05	0.00792489	3	4	Up-regulated
Sus_scrofa___ENSSSCG00000012006	3.31181	6.33375	21.9358	4.13101e-05	0.00860008	3	4	Up-regulated
Sus_scrofa___VMP1	1.74639	8.51976	22.4798	4.14409e-05	0.00860008	3	4	Up-regulated
Sus_scrofa___ADM	4.41622	6.353	21.5654	4.22678e-05	0.00865777	3	4	Up-regulated
Sus_scrofa___EIF2AK2	2.82338	8.27252	22.0496	4.74643e-05	0.00959752	3	4	Up-regulated
Sus_scrofa___EGLN3	4.63784	5.86062	20.7237	4.855e-05	0.00960587	3	4	Up-regulated
Sus_scrofa___IGFBP2	4.45962	5.09411	20.2872	5.05825e-05	0.00972912	3	4	Up-regulated
Sus_scrofa___GRIA1	4.03277	5.0026	20.1559	5.27831e-05	0.00995756	3	4	Up-regulated
Sus_scrofa___RSAD2	4.49822	7.10254	20.8515	5.30329e-05	0.00995756	3	4	Up-regulated
Sus_scrofa___PCGF5	2.54756	7.71352	21.5911	5.46773e-05	0.0101455	3	4	Up-regulated
Sus_scrofa___SLC25A12	2.91296	6.65229	21.0514	6.24805e-05	0.0114586	3	4	Up-regulated
Sus_scrofa___IFI44	3.55251	6.90386	20.8835	6.4689e-05	0.0117151	3	4	Up-regulated
Sus_scrofa___FBXO39	2.92056	7.07837	20.9586	6.53644e-05	0.0117151	3	4	Up-regulated
Sus_scrofa___ENSSSCG00000036297	5.85172	4.39942	19.9173	6.62807e-05	0.011731	3	4	Up-regulated
Sus_scrofa___IFIH1	2.86215	6.98397	20.9	6.69407e-05	0.011731	3	4	Up-regulated
Sus_scrofa___CXCL2	3.018	7.88128	20.7867	6.94787e-05	0.012042	3	4	Up-regulated
Sus_scrofa___TTC39B	2.23383	8.12601	20.4711	7.77602e-05	0.0127383	3	4	Up-regulated
Sus_scrofa___ACO1	2.87454	6.11744	20.031	7.87889e-05	0.0127383	3	4	Up-regulated
Sus_scrofa___OPRD1	5.94247	4.14692	20.4581	8.36651e-05	0.0131957	3	4	Up-regulated
Sus_scrofa___PFKFB3	2.17392	6.93165	20.1811	8.48323e-05	0.0132473	3	4	Up-regulated
Sus_scrofa___SDHC	4.57251	5.14912	19.3229	8.672e-05	0.0133924	3	4	Up-regulated
Sus_scrofa___IL4R	2.43811	6.32833	19.6193	9.05447e-05	0.0133924	3	4	Up-regulated
Sus_scrofa___CLIP1	2.00279	7.44285	19.9637	9.1754e-05	0.0133924	3	4	Up-regulated
Sus_scrofa___ENSSSCG00000025224	3.29606	5.79753	19.1051	9.20391e-05	0.0133924	3	4	Up-regulated
Sus_scrofa___NRG4	5.61249	4.75595	19.0159	9.49562e-05	0.0133924	3	4	Up-regulated
Sus_scrofa___ENSSSCG00000023041	3.96418	4.69817	18.2659	9.56503e-05	0.0133924	3	4	Up-regulated
Sus_scrofa___GPRC5A	4.95658	4.67584	18.8509	9.6085e-05	0.0133924	3	4	Up-regulated
Sus_scrofa___SLC7A2	3.54497	5.41288	18.7535	9.65873e-05	0.0133924	3	4	Up-regulated
Sus_scrofa___LARP1B	4.12295	5.08715	18.4978	9.68e-05	0.0133924	3	4	Up-regulated
Sus_scrofa___ENSSSCG00000031037	5.28456	5.00311	19.1989	0.000100054	0.013604	3	4	Up-regulated
Sus_scrofa___PLEKHA4	3.31235	5.14957	18.6674	0.000100965	0.0136105	3	4	Up-regulated
Sus_scrofa___JADE1	2.34991	7.01211	19.599	0.000102095	0.0136461	3	4	Up-regulated
Sus_scrofa___TMEM132C	2.98624	4.95848	18.2432	0.000108947	0.0140228	3	4	Up-regulated
Sus_scrofa___XIRP2	3.692	4.46815	18.7359	0.000111367	0.0140228	3	4	Up-regulated
Sus_scrofa___TSPAN15	3.50965	6.0176	18.7068	0.000112026	0.0140228	3	4	Up-regulated
Sus_scrofa___E2F8	4.63107	4.6196	18.0403	0.000113178	0.0140555	3	4	Up-regulated
Sus_scrofa___SLC41A2	5.61571	5.12661	19.0468	0.000114232	0.0140755	3	4	Up-regulated
Sus_scrofa___CFAP299	3.25761	5.21432	17.7681	0.000123542	0.0146501	3	4	Up-regulated
Sus_scrofa___PTP4A2	2.09033	7.21044	18.9971	0.000125617	0.0146501	3	4	Up-regulated
Sus_scrofa___CCDC58	4.35413	5.01388	18.0841	0.000126138	0.0146501	3	4	Up-regulated
Sus_scrofa___PTP4A1	3.23064	4.9405	17.6417	0.000126687	0.0146501	3	4	Up-regulated
Sus_scrofa___CMPK2	3.41835	5.99111	18.1546	0.000129799	0.0148348	3	4	Up-regulated
Sus_scrofa___BST2	3.20389	6.27123	18.3006	0.000135088	0.0152187	3	4	Up-regulated
Sus_scrofa___PPA1	2.70487	5.68229	18.2027	0.000137613	0.0153931	3	4	Up-regulated
Sus_scrofa___BVES	5.38586	4.43206	19.9939	0.000143772	0.0159688	3	4	Up-regulated
Sus_scrofa___FZD5	6.40399	4.3527	18.2506	0.000145696	0.0160694	3	4	Up-regulated
Sus_scrofa___MNDA	4.69515	4.98532	17.8182	0.000146768	0.0160752	3	4	Up-regulated
Sus_scrofa___NOCT	6.23641	5.20055	18.1529	0.000149623	0.0161634	3	4	Up-regulated
Sus_scrofa___phTBM	5.73666	4.88674	17.623	0.000155019	0.01652	3	4	Up-regulated
Sus_scrofa___PTGS2	3.51237	5.26061	17.2967	0.000156179	0.0165319	3	4	Up-regulated
Sus_scrofa___CNKSR2	6.97047	4.89045	17.8713	0.000159293	0.016612	3	4	Up-regulated
Sus_scrofa___ABHD6	3.02676	5.5307	17.5473	0.000159726	0.016612	3	4	Up-regulated
Sus_scrofa___PTGIS	2.79706	7.47778	18.1854	0.000163208	0.0167317	3	4	Up-regulated
Sus_scrofa___ZNFX1	2.62579	7.66132	18.1717	0.000165492	0.0167317	3	4	Up-regulated
Sus_scrofa___FOXS1	2.81259	6.05099	17.7259	0.000169026	0.0168272	3	4	Up-regulated
Sus_scrofa___RPP30	3.50685	5.94033	17.731	0.000169518	0.0168272	3	4	Up-regulated
Sus_scrofa___KLHL21	4.16821	5.22197	16.7069	0.000179881	0.0177108	3	4	Up-regulated
Sus_scrofa___GPR156	3.83234	4.40491	16.6542	0.000181625	0.0177108	3	4	Up-regulated
Sus_scrofa___ELAPOR2	3.74636	6.24934	17.2892	0.000181914	0.0177108	3	4	Up-regulated
Sus_scrofa___AP1S3	4.21392	4.37943	16.4535	0.000196179	0.0188667	3	4	Up-regulated
Sus_scrofa___SPAG16	3.40625	6.09803	17.0983	0.000203115	0.0189674	3	4	Up-regulated
Sus_scrofa___FAM162A	2.62792	5.4719	16.917	0.00020436	0.0189674	3	4	Up-regulated
Sus_scrofa___GAREM1	3.51522	7.1372	17.4453	0.000207129	0.0189932	3	4	Up-regulated
Sus_scrofa___HERC6	2.67857	8.955	17.4386	0.000210594	0.0191438	3	4	Up-regulated
Sus_scrofa___TMEM45A	2.74196	6.05909	17.1668	0.000212412	0.0191438	3	4	Up-regulated
Sus_scrofa___KANK1	3.36043	5.65864	16.6626	0.000214809	0.0192498	3	4	Up-regulated
Sus_scrofa___ELL2	2.85498	6.52142	17.1275	0.000220078	0.0196106	3	4	Up-regulated
Sus_scrofa___PPP1R3B	5.12909	4.56535	16.3197	0.000239816	0.0211306	3	4	Up-regulated
Sus_scrofa___ENSSSCG00000027907	3.91083	4.96128	15.9409	0.000241749	0.0211826	3	4	Up-regulated
Sus_scrofa___CRP	2.64746	5.01298	15.9583	0.000243516	0.0212195	3	4	Up-regulated
Sus_scrofa___METTL24	2.915	4.98592	16.0026	0.000245679	0.0212904	3	4	Up-regulated
Sus_scrofa___TBC1D32	1.97237	7.00822	16.7393	0.000267521	0.0223246	3	4	Up-regulated
Sus_scrofa___PRPS2	2.07263	5.59631	16.1259	0.000282651	0.0232186	3	4	Up-regulated
Sus_scrofa___ENSSSCG00000013391	2.04519	5.91773	16.2642	0.000286559	0.0234177	3	4	Up-regulated
Sus_scrofa___PRR16	3.44063	6.85579	16.3772	0.000294095	0.0239097	3	4	Up-regulated
Sus_scrofa___ENSSSCG00000022044	4.33802	4.48661	15.4973	0.000303011	0.0242506	3	4	Up-regulated
Sus_scrofa___CLCA1	3.62163	4.95878	15.3356	0.000307514	0.0242506	3	4	Up-regulated
Sus_scrofa___ENSSSCG00000046704	4.11296	5.19698	15.8519	0.000312059	0.0244356	3	4	Up-regulated
Sus_scrofa___APOBEC2	6.61452	4.41154	16.4285	0.000312959	0.0244356	3	4	Up-regulated
Sus_scrofa___ENSSSCG00000014672	3.69963	5.24565	15.2065	0.000318136	0.0245962	3	4	Up-regulated
Sus_scrofa___ZMAT3	3.16317	5.07432	15.1224	0.000322941	0.0247715	3	4	Up-regulated
Sus_scrofa___CTSC	3.54312	5.73561	15.3552	0.000335815	0.0251018	3	4	Up-regulated
Sus_scrofa___SLCO5A1	5.19674	4.97505	15.3008	0.000345807	0.0257268	3	4	Up-regulated
Sus_scrofa___ORC6	4.08689	4.49104	15.0671	0.000352818	0.0261251	3	4	Up-regulated
Sus_scrofa___CDC6	4.7424	4.28174	15.457	0.000359943	0.0263628	3	4	Up-regulated
Sus_scrofa___LRRFIP2	2.84936	7.23017	15.8818	0.000361188	0.0263628	3	4	Up-regulated
Sus_scrofa___TOB2	3.58538	5.40931	15.2127	0.000363824	0.0263628	3	4	Up-regulated
Sus_scrofa___HMG20B	5.03479	4.64364	15.2301	0.000364386	0.0263628	3	4	Up-regulated
Sus_scrofa___EPSTI1	2.85009	7.52141	15.821	0.000370166	0.0265376	3	4	Up-regulated
Sus_scrofa___DNAJB1	5.32084	4.64956	15.2338	0.000386522	0.0272153	3	4	Up-regulated
Sus_scrofa___ANO1	3.48106	4.55645	14.6313	0.000389048	0.0272714	3	4	Up-regulated
Sus_scrofa___BLM	3.01733	5.72396	15.1665	0.00039585	0.0275037	3	4	Up-regulated
Sus_scrofa___RNF19B	2.39086	6.10734	15.4621	0.000399122	0.0276094	3	4	Up-regulated
Sus_scrofa___ENSSSCG00000032436	3.96299	6.46543	15.0037	0.000404858	0.0278839	3	4	Up-regulated
Sus_scrofa___MFHAS1	2.09526	6.61472	15.4785	0.000410006	0.0281157	3	4	Up-regulated
Sus_scrofa___SAMD4A	1.53655	9.74105	15.4346	0.000422825	0.028816	3	4	Up-regulated
Sus_scrofa___DSP	3.79003	4.39963	14.8312	0.000423872	0.028816	3	4	Up-regulated
Sus_scrofa___SLC28A2	4.95658	4.53188	14.7045	0.000432052	0.0291093	3	4	Up-regulated
Sus_scrofa___POLE	3.78213	4.78555	14.3784	0.00043637	0.0291628	3	4	Up-regulated
Sus_scrofa___ENSSSCG00000002875	3.00506	4.9242	14.4236	0.000446154	0.0296909	3	4	Up-regulated
Sus_scrofa___SLC1A2	3.21977	5.12893	14.5574	0.000458348	0.0302471	3	4	Up-regulated
Sus_scrofa___TMEM243	2.45466	5.25059	14.5093	0.000466745	0.0305153	3	4	Up-regulated
Sus_scrofa___COL12A1	2.90752	7.67672	15.1452	0.000469983	0.0305153	3	4	Up-regulated
Sus_scrofa___LTBP1	1.90837	10.2521	15.1387	0.000470151	0.0305153	3	4	Up-regulated
Sus_scrofa___ERO1A	1.51064	7.05877	15.0908	0.00048166	0.0308811	3	4	Up-regulated
Sus_scrofa___PCSK5	2.87211	7.3549	15.0616	0.000485056	0.0309729	3	4	Up-regulated
Sus_scrofa___TP63	5.96567	4.28806	14.6157	0.000518453	0.0325779	3	4	Up-regulated
Sus_scrofa___SLC19A2	5.74896	4.53531	14.3775	0.000523852	0.0327865	3	4	Up-regulated
Sus_scrofa___PPFIA2	2.68918	6.87024	14.6611	0.000539121	0.0331176	3	4	Up-regulated
Sus_scrofa___TOPAZ1	2.20911	6.57063	14.7364	0.000539584	0.0331176	3	4	Up-regulated
Sus_scrofa___ENSSSCG00000029039	4.02078	4.87932	13.9139	0.000539642	0.0331176	3	4	Up-regulated
Sus_scrofa___UCK2	2.26609	6.93941	14.5866	0.000550683	0.0333521	3	4	Up-regulated
Sus_scrofa___TMEM108	2.92445	6.50643	14.5681	0.000551921	0.0333521	3	4	Up-regulated
Sus_scrofa___PHLDA2	5.22873	4.66939	14.1646	0.000561634	0.0337924	3	4	Up-regulated
Sus_scrofa___HECTD2	2.05365	6.0723	14.4706	0.000565634	0.0337924	3	4	Up-regulated
Sus_scrofa___IRS1	2.64698	5.45786	13.9791	0.000587262	0.0348887	3	4	Up-regulated
Sus_scrofa___RRAGD	4.98187	4.31476	14.7186	0.000588409	0.0348887	3	4	Up-regulated
Sus_scrofa___PDE5A	2.18047	8.77939	14.3709	0.00062236	0.0366264	3	4	Up-regulated
Sus_scrofa___BRCA1	5.1257	4.43611	13.7502	0.000641041	0.0373081	3	4	Up-regulated
Sus_scrofa___FAM13A	1.67111	7.97045	14.2805	0.000644901	0.0373947	3	4	Up-regulated
Sus_scrofa___DNAAF2	3.56092	5.24333	13.7223	0.0006481	0.0374426	3	4	Up-regulated
Sus_scrofa___GLRA3	3.60169	4.42808	13.2781	0.000664854	0.037993	3	4	Up-regulated
Sus_scrofa___CADM2	2.39037	5.70167	13.8826	0.000672811	0.0382477	3	4	Up-regulated
Sus_scrofa___CDCP1	3.47495	5.30207	13.7108	0.00067416	0.0382477	3	4	Up-regulated
Sus_scrofa___ENSSSCG00000013366	2.31658	6.07184	13.8928	0.000694362	0.0390528	3	4	Up-regulated
Sus_scrofa___NCAPD2	2.08373	5.47296	13.677	0.000695779	0.0390528	3	4	Up-regulated
Sus_scrofa___ENSSSCG00000006061	2.07455	6.37986	13.9324	0.000709601	0.0393256	3	4	Up-regulated
Sus_scrofa___KCNMA1	4.74226	6.28868	13.4387	0.000716706	0.0393256	3	4	Up-regulated
Sus_scrofa___MORC3	1.6094	6.86148	13.9886	0.000716787	0.0393256	3	4	Up-regulated
Sus_scrofa___TMEM38B	3.42665	5.44469	13.4818	0.000716809	0.0393256	3	4	Up-regulated
Sus_scrofa___PLOD2	1.5637	8.77812	13.9806	0.000718093	0.0393256	3	4	Up-regulated
Sus_scrofa___HCN1	3.14824	4.6611	13.0588	0.000732301	0.0397927	3	4	Up-regulated
Sus_scrofa___DUSP5	3.87987	4.7591	13.3022	0.000734192	0.0397927	3	4	Up-regulated
Sus_scrofa___GSTO1	4.71996	4.58248	13.389	0.000744107	0.040192	3	4	Up-regulated
Sus_scrofa___NPR3	6.06463	4.33327	13.8083	0.000757524	0.040777	3	4	Up-regulated
Sus_scrofa___DNAH12	3.58279	4.3315	13.1113	0.000779569	0.041513	3	4	Up-regulated
Sus_scrofa___GADD45B	3.05069	5.66151	13.3473	0.000780829	0.041513	3	4	Up-regulated
Sus_scrofa___SLC16A3	4.18161	4.65964	13.0765	0.000784917	0.041513	3	4	Up-regulated
Sus_scrofa___PPM1E	2.86132	7.07405	13.5418	0.000785291	0.041513	3	4	Up-regulated
Sus_scrofa___ENSSSCG00000035544	1.97029	6.71827	13.7113	0.000791337	0.0416032	3	4	Up-regulated
Sus_scrofa___FAM171B	2.79833	4.69674	12.8869	0.000800422	0.041941	3	4	Up-regulated
Sus_scrofa___ATP1B1	5.23455	5.03854	13.176	0.000824374	0.043053	3	4	Up-regulated
Sus_scrofa___ALPK2	4.50614	5.10724	12.9417	0.000844998	0.0439845	3	4	Up-regulated
Sus_scrofa___PACRG	2.77664	5.3954	12.9604	0.000859867	0.0443617	3	4	Up-regulated
Sus_scrofa___CNTN5	5.90225	5.01033	12.9478	0.00086713	0.0444038	3	4	Up-regulated
Sus_scrofa___ANKRD33B	3.22925	5.01914	12.8488	0.000883118	0.0450762	3	4	Up-regulated
Sus_scrofa___MROH5	5.96567	4.19627	13.3286	0.000907823	0.0458916	3	4	Up-regulated
Sus_scrofa___SERPINB2	5.91937	4.21461	13.1982	0.00091999	0.0463581	3	4	Up-regulated
Sus_scrofa___GATA6	3.5206	5.1421	12.5703	0.000953211	0.0478791	3	4	Up-regulated
Sus_scrofa___CDA	5.52227	5.28448	12.9775	0.00098341	0.0490834	3	4	Up-regulated
Sus_scrofa___PTRH2	4.4606	4.47263	12.5712	0.000998448	0.0494537	3	4	Up-regulated
Sus_scrofa___PLGRKT	1.7102	5.80923	12.8745	0.00100024	0.0494537	3	4	Up-regulated
Sus_scrofa___SNTG1	3.51279	5.67401	12.5594	0.00101023	0.0495524	3	4	Up-regulated
Sus_scrofa___KCND2	4.54271	4.72031	12.5168	0.0010143	0.0495524	3	4	Up-regulated
Sus_scrofa___MMS22L	2.9428	5.70461	12.7409	0.00101731	0.0495524	3	4	Up-regulated
Sus_scrofa___SEMA4B	3.65824	4.28265	12.6155	0.00101794	0.0495524	3	4	Up-regulated
Sus_scrofa___ABI3BP	-3.86186	8.92401	64.1829	3.63752e-09	2.86855e-05	3	4	Down-regulated
Sus_scrofa___NCALD	-2.83839	7.53567	40.8599	3.32916e-07	0.000695601	3	4	Down-regulated
Sus_scrofa___ANKRD55	-4.19167	9.21615	39.0444	5.04255e-07	0.000695601	3	4	Down-regulated
Sus_scrofa___HS3ST1	-5.10842	7.23263	35.384	8.77699e-07	0.000928782	3	4	Down-regulated
Sus_scrofa___PRKAG2	-2.71405	9.25906	36.7275	8.8332e-07	0.000928782	3	4	Down-regulated
Sus_scrofa___ENSSSCG00000004081	-3.67733	7.93162	35.8138	1.05589e-06	0.00104084	3	4	Down-regulated
Sus_scrofa___SESN3	-3.67828	7.30196	34.7444	1.25957e-06	0.00116859	3	4	Down-regulated
Sus_scrofa___CCDC3	-3.22382	7.37891	32.7679	2.06839e-06	0.00148285	3	4	Down-regulated
Sus_scrofa___MAGI2	-2.15913	9.58106	30.9846	3.71599e-06	0.00216135	3	4	Down-regulated
Sus_scrofa___SLC9B1	-2.64476	7.38875	30.6445	4.0545e-06	0.00216135	3	4	Down-regulated
Sus_scrofa___THSD1	-2.72902	6.26041	29.0702	4.14955e-06	0.00216135	3	4	Down-regulated
Sus_scrofa___DENND4A	-2.1482	8.89241	30.5641	4.17139e-06	0.00216135	3	4	Down-regulated
Sus_scrofa___DTX1	-3.11955	6.94672	29.5933	4.24815e-06	0.00216135	3	4	Down-regulated
Sus_scrofa___SYNPR	-4.98478	6.67955	27.5542	6.05484e-06	0.00289385	3	4	Down-regulated
Sus_scrofa___RAPGEF4	-2.52513	8.19843	28.2002	7.94119e-06	0.00346601	3	4	Down-regulated
Sus_scrofa___ENSSSCG00000015747	-5.12598	5.63231	25.1619	9.44956e-06	0.00346601	3	4	Down-regulated
Sus_scrofa___MAP3K1	-2.36053	9.27765	27.4222	9.76799e-06	0.00350091	3	4	Down-regulated
Sus_scrofa___PARD6G	-2.54293	9.61879	26.9503	1.11264e-05	0.00368674	3	4	Down-regulated
Sus_scrofa___RORA	-1.74584	10.5049	26.5886	1.22955e-05	0.00377038	3	4	Down-regulated
Sus_scrofa___ZNF704	-2.23397	7.77712	26.3504	1.24309e-05	0.00377038	3	4	Down-regulated
Sus_scrofa___MAN1A1	-1.93802	8.63345	26.3121	1.33971e-05	0.00384181	3	4	Down-regulated
Sus_scrofa___ETS1	-1.65783	9.31741	24.9947	1.94777e-05	0.0052966	3	4	Down-regulated
Sus_scrofa___ND2	-5.22527	6.03885	23.8948	2.03828e-05	0.00544878	3	4	Down-regulated
Sus_scrofa___KLHL4	-2.89693	7.57386	24.1745	2.41598e-05	0.00630827	3	4	Down-regulated
Sus_scrofa___MCTP1	-2.92647	6.68831	23.1989	2.51979e-05	0.00630827	3	4	Down-regulated
Sus_scrofa___RALGPS2	-2.84289	6.99083	23.9224	2.56097e-05	0.0063112	3	4	Down-regulated
Sus_scrofa___CPQ	-2.78574	7.06322	23.7779	2.68719e-05	0.00642158	3	4	Down-regulated
Sus_scrofa___ADCY1	-4.44432	6.16577	22.2055	2.74582e-05	0.00646374	3	4	Down-regulated
Sus_scrofa___ND4	-3.96174	6.23674	22.4679	3.00603e-05	0.00697221	3	4	Down-regulated
Sus_scrofa___HDAC9	-2.10446	9.88995	23.2176	3.29866e-05	0.00732161	3	4	Down-regulated
Sus_scrofa___ARHGEF3	-2.04714	8.47536	21.9592	4.87236e-05	0.00960587	3	4	Down-regulated
Sus_scrofa___COX1	-2.66845	8.475	21.8903	4.99569e-05	0.0097274	3	4	Down-regulated
Sus_scrofa___SPARCL1	-2.11602	6.94154	20.713	7.09346e-05	0.0121607	3	4	Down-regulated
Sus_scrofa___AUTS2	-1.34525	10.1858	20.6713	7.25462e-05	0.0121889	3	4	Down-regulated
Sus_scrofa___ITIH5	-2.35411	7.06704	20.3637	7.26448e-05	0.0121889	3	4	Down-regulated
Sus_scrofa___PTOV1	-5.45319	4.81454	19.4842	7.64613e-05	0.0126942	3	4	Down-regulated
Sus_scrofa___MFSD4A	-3.59248	5.60007	19.0021	7.91501e-05	0.0127383	3	4	Down-regulated
Sus_scrofa___ENSSSCG00000017791	-3.09864	6.58269	19.8699	8.15772e-05	0.0129963	3	4	Down-regulated
Sus_scrofa___ADAMTSL3	-3.45616	6.96792	19.748	9.10075e-05	0.0133924	3	4	Down-regulated
Sus_scrofa___ITPR1	-1.73536	9.51978	19.9019	9.29163e-05	0.0133924	3	4	Down-regulated
Sus_scrofa___CYRIA	-2.3687	7.63946	19.8804	9.3792e-05	0.0133924	3	4	Down-regulated
Sus_scrofa___RAB3IL1	-2.66532	5.63269	18.9388	9.44609e-05	0.0133924	3	4	Down-regulated
Sus_scrofa___SCG3	-4.31087	5.58468	18.3682	9.93673e-05	0.013604	3	4	Down-regulated
Sus_scrofa___PRKCB	-2.39059	7.7427	19.55	0.00010469	0.0138754	3	4	Down-regulated
Sus_scrofa___COLGALT2	-2.48617	7.495	19.3712	0.000106759	0.0140228	3	4	Down-regulated
Sus_scrofa___EPB42	-3.24973	5.57076	18.1466	0.000108565	0.0140228	3	4	Down-regulated
Sus_scrofa___REEP1	-2.45947	7.95336	19.2508	0.000109875	0.0140228	3	4	Down-regulated
Sus_scrofa___ENSSSCG00000000854	-4.59913	5.23387	17.9529	0.000110771	0.0140228	3	4	Down-regulated
Sus_scrofa___RALGAPA2	-1.77625	9.75763	19.1676	0.000117938	0.0144195	3	4	Down-regulated
Sus_scrofa___ENSSSCG00000049691	-1.49119	9.96507	19.0729	0.000121614	0.0146501	3	4	Down-regulated
Sus_scrofa___STON2	-2.3503	9.64038	18.9497	0.000126767	0.0146501	3	4	Down-regulated
Sus_scrofa___DLG2	-2.76612	7.2578	18.8779	0.000126938	0.0146501	3	4	Down-regulated
Sus_scrofa___OSBPL6	-2.30044	9.82817	18.9383	0.000127255	0.0146501	3	4	Down-regulated
Sus_scrofa___SGSM1	-3.17542	5.41126	17.4553	0.000133659	0.015166	3	4	Down-regulated
Sus_scrofa___NXN	-1.87454	9.98911	18.4773	0.000148114	0.0161107	3	4	Down-regulated
Sus_scrofa___SLC9A9	-1.66463	9.00494	18.3896	0.00015282	0.0163964	3	4	Down-regulated
Sus_scrofa___SEMA6A	-2.5209	10.389	18.2439	0.000160095	0.016612	3	4	Down-regulated
Sus_scrofa___FARP2	-1.99664	6.99122	18.1221	0.000163838	0.0167317	3	4	Down-regulated
Sus_scrofa___GPM6A	-2.19814	9.76649	18.1485	0.000165383	0.0167317	3	4	Down-regulated
Sus_scrofa___ANTXR2	-1.79954	8.65986	18.0808	0.000169638	0.0168272	3	4	Down-regulated
Sus_scrofa___SRGAP3	-2.69096	7.14245	17.6973	0.000183574	0.0177627	3	4	Down-regulated
Sus_scrofa___CELSR1	-2.2133	7.86879	17.6014	0.000199488	0.0189674	3	4	Down-regulated
Sus_scrofa___PROM1	-4.13745	5.0146	16.5296	0.000200516	0.0189674	3	4	Down-regulated
Sus_scrofa___FOXP1	-1.34568	10.9144	17.5692	0.000200941	0.0189674	3	4	Down-regulated
Sus_scrofa___CCDC170	-2.01818	7.10672	17.4019	0.000204442	0.0189674	3	4	Down-regulated
Sus_scrofa___TC2N	-2.23294	7.34206	17.4845	0.000206124	0.0189932	3	4	Down-regulated
Sus_scrofa___SLC38A4	-4.42262	6.18754	16.7442	0.00021166	0.0191438	3	4	Down-regulated
Sus_scrofa___SNX2	-1.85309	7.2079	17.1283	0.000234401	0.0207695	3	4	Down-regulated
Sus_scrofa___KIAA1191	-2.32737	6.10698	16.5683	0.000247552	0.0213355	3	4	Down-regulated
Sus_scrofa___NOS1AP	-1.75702	9.11197	16.9356	0.000250215	0.0214478	3	4	Down-regulated
Sus_scrofa___DOCK9	-1.56641	11.1181	16.8342	0.000258497	0.0220379	3	4	Down-regulated
Sus_scrofa___TCEA2	-2.26486	6.78519	16.7389	0.00026016	0.0220604	3	4	Down-regulated
Sus_scrofa___CYTB	-4.03774	6.54183	16.3419	0.000264381	0.0222985	3	4	Down-regulated
Sus_scrofa___DNMBP	-1.45074	8.61254	16.759	0.000266318	0.0223246	3	4	Down-regulated
Sus_scrofa___GSDMD	-3.07113	5.4342	16.0247	0.000268973	0.0223276	3	4	Down-regulated
Sus_scrofa___DOCK8	-1.94625	7.21469	16.6542	0.000275559	0.0227546	3	4	Down-regulated
Sus_scrofa___LAYN	-2.91744	5.75247	15.8451	0.000300464	0.0242506	3	4	Down-regulated
Sus_scrofa___KAZN	-2.50861	6.78591	16.2048	0.000304161	0.0242506	3	4	Down-regulated
Sus_scrofa___KIDINS220	-1.52383	7.94802	16.3801	0.000304727	0.0242506	3	4	Down-regulated
Sus_scrofa___DLGAP1	-2.20954	9.27994	16.3427	0.000307132	0.0242506	3	4	Down-regulated
Sus_scrofa___ENSSSCG00000003090	-1.77992	8.12545	16.2645	0.000316975	0.0245962	3	4	Down-regulated
Sus_scrofa___MCF2L	-2.76148	5.83877	15.5157	0.000323544	0.0247715	3	4	Down-regulated
Sus_scrofa___ST6GAL1	-1.89412	7.23124	16.1383	0.000329842	0.0250542	3	4	Down-regulated
Sus_scrofa___SLCO2B1	-3.20855	6.42556	15.6875	0.000330412	0.0250542	3	4	Down-regulated
Sus_scrofa___ZNF423	-1.78652	8.25805	16.1307	0.000332039	0.025057	3	4	Down-regulated
Sus_scrofa___DAZAP1	-1.68857	6.8122	16.0692	0.000334629	0.0251018	3	4	Down-regulated
Sus_scrofa___GOLPH3L	-2.11779	6.36087	15.7297	0.000360117	0.0263628	3	4	Down-regulated
Sus_scrofa___STOX2	-1.91561	9.97243	15.839	0.000366277	0.0263786	3	4	Down-regulated
Sus_scrofa___CDC25B	-2.24376	5.90691	15.2309	0.000375371	0.0267889	3	4	Down-regulated
Sus_scrofa___CHST9	-2.07214	7.66149	15.7033	0.000379586	0.0268987	3	4	Down-regulated
Sus_scrofa___TSEN2	-1.63052	7.72624	15.7481	0.00038032	0.0268987	3	4	Down-regulated
Sus_scrofa___MDGA2	-1.84043	8.44345	15.6303	0.000395697	0.0275037	3	4	Down-regulated
Sus_scrofa___ENSSSCG00000002260	-1.37396	8.20801	15.3789	0.00043328	0.0291093	3	4	Down-regulated
Sus_scrofa___CHP2	-2.19371	7.32878	15.3435	0.000433724	0.0291093	3	4	Down-regulated
Sus_scrofa___DOP1B	-1.90827	6.59148	15.0813	0.000454333	0.0301082	3	4	Down-regulated
Sus_scrofa___MYL2	-3.97976	6.65651	14.6233	0.000467899	0.0305153	3	4	Down-regulated
Sus_scrofa___ANO8	-5.09918	4.63176	14.4342	0.000475665	0.0307467	3	4	Down-regulated
Sus_scrofa___COX2	-3.2642	7.77553	15.0801	0.00047889	0.0308288	3	4	Down-regulated
Sus_scrofa___RABGAP1L	-1.17648	9.39358	15.0355	0.000488036	0.0310375	3	4	Down-regulated
Sus_scrofa___ATP6	-3.57621	7.13618	14.9016	0.000490844	0.0310611	3	4	Down-regulated
Sus_scrofa___KIF3A	-1.6797	6.94964	15.0116	0.000492346	0.0310611	3	4	Down-regulated
Sus_scrofa___DIP2B	-1.19794	9.27505	14.796	0.000532298	0.0331176	3	4	Down-regulated
Sus_scrofa___SH3TC1	-2.28648	6.01426	14.4343	0.000538931	0.0331176	3	4	Down-regulated
Sus_scrofa___TRPS1	-1.30401	9.18006	14.746	0.000542101	0.0331396	3	4	Down-regulated
Sus_scrofa___NR2F1	-3.03977	6.35224	14.4353	0.000547384	0.0333333	3	4	Down-regulated
Sus_scrofa___F8	-2.07125	6.5853	14.5227	0.000565255	0.0337924	3	4	Down-regulated
Sus_scrofa___TTC39C	-5.38791	4.94355	13.9348	0.000615097	0.0363345	3	4	Down-regulated
Sus_scrofa___ENSSSCG00000048546	-3.932	5.42266	13.674	0.000639792	0.0373081	3	4	Down-regulated
Sus_scrofa___TNRC6A	-1.27065	8.97279	14.2918	0.000640212	0.0373081	3	4	Down-regulated
Sus_scrofa___FBXO21	-1.75364	6.42331	14.1477	0.000651279	0.037489	3	4	Down-regulated
Sus_scrofa___HPSE2	-4.33305	6.92889	13.9594	0.000660673	0.0378914	3	4	Down-regulated
Sus_scrofa___FNBP1L	-1.40112	7.81466	14.0888	0.000693022	0.0390528	3	4	Down-regulated
Sus_scrofa___ZSWIM6	-1.14674	9.43347	14.0265	0.000705383	0.0393256	3	4	Down-regulated
Sus_scrofa___RCBTB2	-1.52235	7.64489	13.9987	0.000716748	0.0393256	3	4	Down-regulated
Sus_scrofa___ENSSSCG00000027916	-3.16035	5.74421	13.548	0.000721037	0.0393501	3	4	Down-regulated
Sus_scrofa___QSOX1	-1.86863	6.64175	13.6919	0.000779849	0.041513	3	4	Down-regulated
Sus_scrofa___USP31	-1.38409	8.29625	13.7408	0.000786989	0.041513	3	4	Down-regulated
Sus_scrofa___TFPI	-2.32399	7.207	13.4877	0.00085839	0.0443617	3	4	Down-regulated
Sus_scrofa___ENSSSCG00000008137	-1.71904	9.0999	13.4862	0.000863475	0.0443617	3	4	Down-regulated
Sus_scrofa___ENSSSCG00000043817	-1.55369	8.69541	13.4884	0.000863495	0.0443617	3	4	Down-regulated
Sus_scrofa___C3orf70	-1.92277	7.57021	13.3982	0.000894783	0.0455243	3	4	Down-regulated
Sus_scrofa___ITGA9	-2.08815	10.3402	13.3503	0.000907427	0.0458916	3	4	Down-regulated
Sus_scrofa___LHFPL1	-3.07907	5.41327	12.639	0.000978094	0.048973	3	4	Down-regulated
Sus_scrofa___PLPP1	-1.70368	10.6791	13.1058	0.000995023	0.0494537	3	4	Down-regulated
Sus_scrofa___COL15A1	-2.35047	6.88403	12.9559	0.00101612	0.0495524	3	4	Down-regulated

## Sheet: Fibroblasts
Gene	logFC	logCPM	F	PValue	FDR	Observations_Extended	Observations_Control	level
Sus_scrofa___hCD46	11.4911	7.64313	233.095	1.96838e-13	4.51604e-09	3	4	Up-regulated
Sus_scrofa___DZIP1L	4.08101	6.17215	88.2475	7.24228e-10	8.30799e-06	3	4	Up-regulated
Sus_scrofa___ENO1	5.17313	7.2831	76.8692	2.88176e-09	1.94347e-05	3	4	Up-regulated
Sus_scrofa___LIPG	5.3143	6.23096	70.3319	3.38835e-09	1.94347e-05	3	4	Up-regulated
Sus_scrofa___ZNF146	2.04214	7.45855	74.9736	4.28302e-09	1.9653e-05	3	4	Up-regulated
Sus_scrofa___PKDCC	4.07461	7.96426	69.9257	8.46795e-09	3.238e-05	3	4	Up-regulated
Sus_scrofa___GBE1	2.65256	8.13622	64.8003	1.70924e-08	3.91617e-05	3	4	Up-regulated
Sus_scrofa___ENSSSCG00000038594	4.88415	5.878	58.5701	1.8776e-08	3.91617e-05	3	4	Up-regulated
Sus_scrofa___RCBTB1	2.22941	6.58406	54.0347	9.04311e-08	0.000138317	3	4	Up-regulated
Sus_scrofa___CTPS1	5.57489	5.54618	49.0875	1.2412e-07	0.000165976	3	4	Up-regulated
Sus_scrofa___PTPA	2.44533	5.35164	50.5975	1.56271e-07	0.000188701	3	4	Up-regulated
Sus_scrofa___MINPP1	4.01758	5.36662	46.9286	1.90804e-07	0.000202722	3	4	Up-regulated
Sus_scrofa___TNC	5.11187	9.21548	49.4885	1.9439e-07	0.000202722	3	4	Up-regulated
Sus_scrofa___HSPA5	4.13865	5.59062	47.8587	2.12038e-07	0.000211512	3	4	Up-regulated
Sus_scrofa___RHOD	4.17548	4.77758	44.2894	2.87604e-07	0.000261351	3	4	Up-regulated
Sus_scrofa___DIPK1A	2.84912	6.65071	46.9266	3.02868e-07	0.000261351	3	4	Up-regulated
Sus_scrofa___UCK2	3.81317	6.28877	45.5571	3.17483e-07	0.000261351	3	4	Up-regulated
Sus_scrofa___SOCS5	1.77994	8.26587	46.6322	3.18957e-07	0.000261351	3	4	Up-regulated
Sus_scrofa___HK1	2.46537	7.57305	43.5915	5.61709e-07	0.000426799	3	4	Up-regulated
Sus_scrofa___ERCC6	2.45826	5.05811	43.1289	5.9012e-07	0.000426799	3	4	Up-regulated
Sus_scrofa___IL4R	3.58344	7.31337	43.008	6.32921e-07	0.000426799	3	4	Up-regulated
Sus_scrofa___ASNS	2.55149	5.87906	42.7512	6.58397e-07	0.000426799	3	4	Up-regulated
Sus_scrofa___PDLIM7	3.96	7.17606	42.58	6.83312e-07	0.000426799	3	4	Up-regulated
Sus_scrofa___ENSSSCG00000035544	1.91543	6.42634	42.5758	6.883e-07	0.000426799	3	4	Up-regulated
Sus_scrofa___CTSH	2.11704	7.33094	42.5156	6.89708e-07	0.000426799	3	4	Up-regulated
Sus_scrofa___PPP4R4	4.02097	3.26893	38.8102	7.12006e-07	0.000426799	3	4	Up-regulated
Sus_scrofa___ACVR1B	3.14052	6.26127	40.0812	1.07221e-06	0.000537378	3	4	Up-regulated
Sus_scrofa___SLC20A1	2.7138	6.55756	40.2767	1.07743e-06	0.000537378	3	4	Up-regulated
Sus_scrofa___WNK3	3.94532	3.21152	37.3962	1.18467e-06	0.000566305	3	4	Up-regulated
Sus_scrofa___PRRG1	3.04894	6.03376	39.3293	1.24163e-06	0.000569735	3	4	Up-regulated
Sus_scrofa___COA7	4.59716	3.79547	37.5127	1.38479e-06	0.000622963	3	4	Up-regulated
Sus_scrofa___ENSSSCG00000033700	2.7011	5.12591	37.2018	1.69757e-06	0.000691467	3	4	Up-regulated
Sus_scrofa___CHST11	3.45617	8.87778	37.9505	1.7108e-06	0.000691467	3	4	Up-regulated
Sus_scrofa___ENSSSCG00000005241	2.93576	4.02915	36.4636	1.72977e-06	0.000691467	3	4	Up-regulated
Sus_scrofa___FAM162A	3.87394	5.28336	37.1483	1.74803e-06	0.000691467	3	4	Up-regulated
Sus_scrofa___BACH1	1.87051	7.19489	37.4351	1.90616e-06	0.000728885	3	4	Up-regulated
Sus_scrofa___SLC20A2	3.8299	6.76611	37.0203	2.08109e-06	0.000775246	3	4	Up-regulated
Sus_scrofa___VMP1	2.23735	9.03597	36.2819	2.42422e-06	0.000830131	3	4	Up-regulated
Sus_scrofa___CRLF1	9.08024	5.48026	38.8115	2.52534e-06	0.000830741	3	4	Up-regulated
Sus_scrofa___IGFBP2	4.67092	5.05186	35.1484	2.55979e-06	0.000830741	3	4	Up-regulated
Sus_scrofa___AKR1D1	2.45878	5.39573	36.0038	2.58279e-06	0.000830741	3	4	Up-regulated
Sus_scrofa___MRPS30	3.02728	5.44929	34.4442	3.13747e-06	0.000947145	3	4	Up-regulated
Sus_scrofa___FGFR2	3.27882	7.39372	34.6833	3.45056e-06	0.00101495	3	4	Up-regulated
Sus_scrofa___PINX1	1.73779	6.40886	33.645	4.33492e-06	0.00119827	3	4	Up-regulated
Sus_scrofa___TSC22D2	2.73927	6.76609	33.3387	4.64128e-06	0.00125276	3	4	Up-regulated
Sus_scrofa___VDAC1	1.94368	5.8259	33.0176	4.99734e-06	0.0013243	3	4	Up-regulated
Sus_scrofa___GPI	2.50972	6.86415	32.9722	5.02174e-06	0.0013243	3	4	Up-regulated
Sus_scrofa___DPH5	2.94618	4.99539	32.1718	5.21203e-06	0.00134742	3	4	Up-regulated
Sus_scrofa___NAMPT	2.51072	6.479	32.7584	5.29173e-06	0.00134742	3	4	Up-regulated
Sus_scrofa___ACO1	2.5267	5.77296	32.7524	5.29656e-06	0.00134742	3	4	Up-regulated
Sus_scrofa___TEAD3	2.1852	6.41202	32.4382	5.67548e-06	0.00140013	3	4	Up-regulated
Sus_scrofa___PDIA5	2.72566	5.75767	32.0061	6.26237e-06	0.0015124	3	4	Up-regulated
Sus_scrofa___VDR	4.53026	5.72864	31.3531	6.65512e-06	0.00152363	3	4	Up-regulated
Sus_scrofa___GPC5	4.99638	8.40167	31.5542	6.70736e-06	0.00152363	3	4	Up-regulated
Sus_scrofa___FAM98A	2.73109	5.30828	30.9873	7.23124e-06	0.00161074	3	4	Up-regulated
Sus_scrofa___PSMD1	1.59257	7.25338	31.2562	7.41883e-06	0.00162105	3	4	Up-regulated
Sus_scrofa___KDM4C	1.17284	8.06002	31.0686	7.72686e-06	0.0016568	3	4	Up-regulated
Sus_scrofa___ENSSSCG00000004983	2.33498	5.48721	30.7814	8.03338e-06	0.00169092	3	4	Up-regulated
Sus_scrofa___ELL2	4.50683	6.1175	30.2948	8.21689e-06	0.00171382	3	4	Up-regulated
Sus_scrofa___PABPC4	3.15776	5.00572	29.4962	8.51901e-06	0.00176083	3	4	Up-regulated
Sus_scrofa___ADAMTS6	3.96421	7.59563	30.4619	8.98121e-06	0.00183367	3	4	Up-regulated
Sus_scrofa___ZMAT3	3.78511	4.47541	28.7078	9.43677e-06	0.00189919	3	4	Up-regulated
Sus_scrofa___ACVR2A	1.56502	7.66935	29.5699	1.10136e-05	0.0021597	3	4	Up-regulated
Sus_scrofa___TEAD4	2.74943	5.65211	29.3267	1.1513e-05	0.0022385	3	4	Up-regulated
Sus_scrofa___LRRC31	7.8451	2.50936	26.5381	1.17014e-05	0.00224047	3	4	Up-regulated
Sus_scrofa___KPNA3	1.60087	6.5522	29.2918	1.18292e-05	0.00224296	3	4	Up-regulated
Sus_scrofa___METAP1	2.35798	5.55706	28.9122	1.25313e-05	0.0023566	3	4	Up-regulated
Sus_scrofa___BDKRB2	5.70531	4.47806	27.962	1.27553e-05	0.00237923	3	4	Up-regulated
Sus_scrofa___TAF4B	2.57542	6.20327	28.7458	1.33793e-05	0.00245922	3	4	Up-regulated
Sus_scrofa___LMNA	1.98746	6.44844	28.7852	1.33985e-05	0.00245922	3	4	Up-regulated
Sus_scrofa___ALDH3A2	1.35129	7.21693	28.5707	1.40369e-05	0.00251601	3	4	Up-regulated
Sus_scrofa___ENSSSCG00000009072	2.0199	5.63015	28.4357	1.43934e-05	0.00255048	3	4	Up-regulated
Sus_scrofa___HK2	8.13357	6.26295	27.6489	1.48553e-05	0.00260172	3	4	Up-regulated
Sus_scrofa___ENSSSCG00000035577	3.94607	3.19824	27.023	1.49728e-05	0.00260243	3	4	Up-regulated
Sus_scrofa___PRRX2	2.72583	7.12722	28.1716	1.54904e-05	0.0026132	3	4	Up-regulated
Sus_scrofa___TUSC3	3.61876	5.99628	27.6259	1.63519e-05	0.00271183	3	4	Up-regulated
Sus_scrofa___SYCP2	4.12148	6.60697	27.8765	1.65623e-05	0.00271183	3	4	Up-regulated
Sus_scrofa___LRP12	2.43169	6.42482	27.9096	1.65788e-05	0.00271183	3	4	Up-regulated
Sus_scrofa___GPR158	3.16471	3.82148	26.5898	1.72374e-05	0.00276559	3	4	Up-regulated
Sus_scrofa___TOPAZ1	2.02675	6.93208	27.6126	1.78074e-05	0.00283719	3	4	Up-regulated
Sus_scrofa___GPM6B	1.56236	8.22305	27.5359	1.8095e-05	0.00284351	3	4	Up-regulated
Sus_scrofa___TMEM38B	4.04401	4.63872	26.1687	1.82761e-05	0.00285243	3	4	Up-regulated
Sus_scrofa___ENSSSCG00000004830	2.30343	8.58043	27.3597	1.89044e-05	0.00289206	3	4	Up-regulated
Sus_scrofa___ENSSSCG00000009293	2.37435	7.44462	27.3647	1.89081e-05	0.00289206	3	4	Up-regulated
Sus_scrofa___HGF	3.31398	7.09085	27.2516	1.95321e-05	0.00296772	3	4	Up-regulated
Sus_scrofa___OSMR	1.56771	7.69091	27.1873	1.9749e-05	0.00298093	3	4	Up-regulated
Sus_scrofa___GBF1	1.20873	8.38914	27.1368	1.99893e-05	0.00299025	3	4	Up-regulated
Sus_scrofa___ENSSSCG00000032999	3.79742	3.65825	26.2051	2.01596e-05	0.00299025	3	4	Up-regulated
Sus_scrofa___BCL3	3.32076	4.54953	26.091	2.06916e-05	0.00302016	3	4	Up-regulated
Sus_scrofa___RAI14	2.58735	9.3011	26.9536	2.09303e-05	0.00302016	3	4	Up-regulated
Sus_scrofa___TOMM70	1.85907	5.96037	26.9017	2.13513e-05	0.00303569	3	4	Up-regulated
Sus_scrofa___PDE4B	3.88926	7.93813	26.8831	2.14349e-05	0.00303569	3	4	Up-regulated
Sus_scrofa___KIF24	5.30427	2.65689	25.6141	2.16984e-05	0.00305415	3	4	Up-regulated
Sus_scrofa___PDLIM1	2.9062	5.99923	26.698	2.24247e-05	0.00308078	3	4	Up-regulated
Sus_scrofa___KCNK12	8.39387	3.57325	25.4282	2.34303e-05	0.00312678	3	4	Up-regulated
Sus_scrofa___FN1	2.89886	9.75039	26.4712	2.36496e-05	0.00312678	3	4	Up-regulated
Sus_scrofa___CCDC58	3.3512	4.13361	25.2365	2.38499e-05	0.00312678	3	4	Up-regulated
Sus_scrofa___ENSSSCG00000041731	1.63949	6.08672	26.4038	2.42475e-05	0.003143	3	4	Up-regulated
Sus_scrofa___CES1	6.9822	3.22613	27.9556	2.45817e-05	0.00315391	3	4	Up-regulated
Sus_scrofa___CLSTN3	3.77414	3.40848	24.727	2.46067e-05	0.00315391	3	4	Up-regulated
Sus_scrofa___ASIC2	3.22766	4.78035	25.8594	2.54548e-05	0.00319131	3	4	Up-regulated
Sus_scrofa___DCLRE1B	3.41696	2.88827	24.6447	2.56523e-05	0.00319519	3	4	Up-regulated
Sus_scrofa___ANPEP	4.64791	5.09055	24.9488	2.57643e-05	0.00319519	3	4	Up-regulated
Sus_scrofa___FBXO4	1.89552	5.27843	25.867	2.73338e-05	0.0032869	3	4	Up-regulated
Sus_scrofa___NANS	1.34356	6.52635	25.9171	2.73429e-05	0.0032869	3	4	Up-regulated
Sus_scrofa___MRPS27	1.62181	6.79412	25.88	2.76034e-05	0.0032869	3	4	Up-regulated
Sus_scrofa___SLC41A2	2.04996	6.81131	25.8527	2.78095e-05	0.0032869	3	4	Up-regulated
Sus_scrofa___PYM1	3.07127	4.05933	24.7034	2.81818e-05	0.0032869	3	4	Up-regulated
Sus_scrofa___PTGS2	4.78705	6.66855	25.3783	2.81989e-05	0.0032869	3	4	Up-regulated
Sus_scrofa___SPATA5	1.86331	8.52498	25.7825	2.82336e-05	0.0032869	3	4	Up-regulated
Sus_scrofa___DUSP5	4.77917	3.70529	24.6444	2.83662e-05	0.0032869	3	4	Up-regulated
Sus_scrofa___TFB2M	3.40783	4.05106	24.5448	2.89504e-05	0.00333773	3	4	Up-regulated
Sus_scrofa___NDRG1	1.91355	7.19721	25.5972	2.96343e-05	0.00338259	3	4	Up-regulated
Sus_scrofa___SMARCA4	1.49336	6.90658	25.5701	2.98754e-05	0.00339322	3	4	Up-regulated
Sus_scrofa___NAA25	1.78376	6.95408	25.3919	3.13461e-05	0.00350817	3	4	Up-regulated
Sus_scrofa___LRRFIP1	2.32833	8.69959	25.2953	3.20286e-05	0.00354615	3	4	Up-regulated
Sus_scrofa___BCL2L13	1.54708	6.43424	25.2677	3.23848e-05	0.00354615	3	4	Up-regulated
Sus_scrofa___SLC25A12	2.30324	5.82061	25.2838	3.24105e-05	0.00354615	3	4	Up-regulated
Sus_scrofa___SLC7A2	3.53887	4.93693	24.5908	3.24583e-05	0.00354615	3	4	Up-regulated
Sus_scrofa___CCDC91	1.49437	7.60745	25.0907	3.38066e-05	0.0036586	3	4	Up-regulated
Sus_scrofa___ICAM1	2.49864	5.24764	25.0076	3.4511e-05	0.0037173	3	4	Up-regulated
Sus_scrofa___SLC4A1AP	1.51136	6.03408	24.8834	3.59004e-05	0.00382598	3	4	Up-regulated
Sus_scrofa___URGCP	1.98748	5.63672	24.8519	3.60306e-05	0.00382598	3	4	Up-regulated
Sus_scrofa___BAG3	2.73305	5.32652	24.4851	3.67725e-05	0.0038391	3	4	Up-regulated
Sus_scrofa___TRIB3	4.91692	5.11415	23.8366	3.67799e-05	0.0038391	3	4	Up-regulated
Sus_scrofa___GNL3	2.13042	5.4957	24.7199	3.68131e-05	0.0038391	3	4	Up-regulated
Sus_scrofa___ATP13A3	2.92732	7.63612	24.7234	3.73479e-05	0.00385979	3	4	Up-regulated
Sus_scrofa___SHISA9	8.25324	5.88064	23.5985	3.75642e-05	0.00386473	3	4	Up-regulated
Sus_scrofa___ENSSSCG00000012006	2.42274	5.81993	24.6149	3.85381e-05	0.00394723	3	4	Up-regulated
Sus_scrofa___PNPT1	1.84148	6.27054	24.5889	3.87384e-05	0.00394782	3	4	Up-regulated
Sus_scrofa___CDH11	1.91987	9.59034	24.5555	3.8888e-05	0.00394782	3	4	Up-regulated
Sus_scrofa___MRS2	3.21939	4.50486	23.4963	3.95068e-05	0.00399297	3	4	Up-regulated
Sus_scrofa___QTRT1	2.42478	5.35489	24.4002	4.00397e-05	0.00401148	3	4	Up-regulated
Sus_scrofa___VEZT	1.25405	6.55567	24.4211	4.04154e-05	0.00401943	3	4	Up-regulated
Sus_scrofa___TMEM161B	1.53102	6.24684	24.4309	4.04694e-05	0.00401943	3	4	Up-regulated
Sus_scrofa___TMEM70	2.80102	4.36879	23.8423	4.07493e-05	0.00402979	3	4	Up-regulated
Sus_scrofa___BHLHE40	4.22088	5.29507	23.5272	4.15606e-05	0.00409239	3	4	Up-regulated
Sus_scrofa___METAP1D	2.28605	5.22977	23.9056	4.36782e-05	0.00426429	3	4	Up-regulated
Sus_scrofa___NLK	1.83652	6.91849	24.0408	4.48161e-05	0.00433846	3	4	Up-regulated
Sus_scrofa___ADAM12	4.22654	8.86645	24.0009	4.51379e-05	0.00435125	3	4	Up-regulated
Sus_scrofa___HIF1A	1.59663	7.2374	23.979	4.53961e-05	0.00435784	3	4	Up-regulated
Sus_scrofa___NSUN3	2.63349	6.01755	23.7343	4.73339e-05	0.00444773	3	4	Up-regulated
Sus_scrofa___SLC39A14	1.93529	9.31472	23.8069	4.74957e-05	0.00444773	3	4	Up-regulated
Sus_scrofa___KCNMA1	5.08299	8.05197	23.7664	4.80883e-05	0.00448492	3	4	Up-regulated
Sus_scrofa___HYOU1	2.00504	4.77928	23.6607	4.89538e-05	0.00452393	3	4	Up-regulated
Sus_scrofa___OLA1	1.78033	7.43667	23.6773	4.92953e-05	0.00452393	3	4	Up-regulated
Sus_scrofa___RUNX1	2.6762	8.98398	23.6317	4.97955e-05	0.00453357	3	4	Up-regulated
Sus_scrofa___DNA2	2.95247	4.25793	23.2041	5.00679e-05	0.00454035	3	4	Up-regulated
Sus_scrofa___ENSSSCG00000014132	2.69138	4.30296	22.9483	5.10612e-05	0.00459411	3	4	Up-regulated
Sus_scrofa___FAM13A	1.49299	9.16368	23.4247	5.26594e-05	0.00470103	3	4	Up-regulated
Sus_scrofa___TIMMDC1	1.34701	6.20361	23.4096	5.31612e-05	0.00472744	3	4	Up-regulated
Sus_scrofa___SLC38A11	5.31938	2.02682	21.0145	5.47334e-05	0.0048113	3	4	Up-regulated
Sus_scrofa___DDX60	5.10085	6.43545	22.8441	5.59077e-05	0.00489576	3	4	Up-regulated
Sus_scrofa___PMS1	2.2669	5.73485	23.175	5.66176e-05	0.00492037	3	4	Up-regulated
Sus_scrofa___ECD	1.80172	5.19452	23.1235	5.73426e-05	0.00492947	3	4	Up-regulated
Sus_scrofa___PLCXD3	2.96797	7.07606	23.1298	5.73669e-05	0.00492947	3	4	Up-regulated
Sus_scrofa___BNIP3	2.8367	6.77032	23.0987	5.77738e-05	0.00494591	3	4	Up-regulated
Sus_scrofa___SETDB2	2.26161	4.8106	22.8791	5.87349e-05	0.00499094	3	4	Up-regulated
Sus_scrofa___BLZF1	2.02015	4.50532	22.8242	6.05528e-05	0.00507012	3	4	Up-regulated
Sus_scrofa___ENSSSCG00000016191	3.97098	3.37034	22.3362	6.07716e-05	0.00507012	3	4	Up-regulated
Sus_scrofa___PDGFA	3.29364	2.82371	21.625	6.2848e-05	0.00522436	3	4	Up-regulated
Sus_scrofa___GOLT1B	1.62104	4.6946	22.7402	6.33738e-05	0.00523526	3	4	Up-regulated
Sus_scrofa___ITGA3	2.74036	3.20788	21.8366	6.64497e-05	0.00546436	3	4	Up-regulated
Sus_scrofa___ARHGEF39	2.27781	3.83933	22.3802	6.787e-05	0.0055306	3	4	Up-regulated
Sus_scrofa___ANXA13	6.51266	1.52612	21.199	6.87195e-05	0.0055306	3	4	Up-regulated
Sus_scrofa___STC2	5.25608	5.65999	21.4157	7.11043e-05	0.0056448	3	4	Up-regulated
Sus_scrofa___EPHA7	3.68236	7.21928	22.2372	7.34123e-05	0.00576437	3	4	Up-regulated
Sus_scrofa___TIMP1	3.48615	6.2975	22.0191	7.37696e-05	0.00576437	3	4	Up-regulated
Sus_scrofa___RTKN2	2.51617	4.3935	22.0429	7.38437e-05	0.00576437	3	4	Up-regulated
Sus_scrofa___IER3	6.54588	5.33088	21.7322	7.45651e-05	0.00576437	3	4	Up-regulated
Sus_scrofa___PLEKHA6	3.83628	6.33744	22.1123	7.50812e-05	0.00576437	3	4	Up-regulated
Sus_scrofa___HSPA4	1.42335	6.61766	22.1236	7.55662e-05	0.00576437	3	4	Up-regulated
Sus_scrofa___DNAJB6	1.56689	6.44797	22.1127	7.57848e-05	0.00576437	3	4	Up-regulated
Sus_scrofa___DNAJB9	2.32971	3.97513	21.6826	7.69251e-05	0.00580648	3	4	Up-regulated
Sus_scrofa___INTS13	2.87121	4.35275	21.24	7.69469e-05	0.00580648	3	4	Up-regulated
Sus_scrofa___RFC2	1.69844	4.20341	21.8985	8.10655e-05	0.00601905	3	4	Up-regulated
Sus_scrofa___SESN2	2.38494	3.6463	21.6044	8.14036e-05	0.00602465	3	4	Up-regulated
Sus_scrofa___KATNAL2	3.04978	3.01221	20.9366	8.22337e-05	0.00604915	3	4	Up-regulated
Sus_scrofa___LUZP1	1.52786	7.71134	21.7469	8.37792e-05	0.00612149	3	4	Up-regulated
Sus_scrofa___AFAP1	1.38673	7.56477	21.6894	8.51392e-05	0.00616198	3	4	Up-regulated
Sus_scrofa___NKAIN3	2.93579	6.67231	21.6849	8.55837e-05	0.00617467	3	4	Up-regulated
Sus_scrofa___AEN	3.23672	3.8172	20.7823	8.6503e-05	0.0062089	3	4	Up-regulated
Sus_scrofa___RILPL1	2.21496	5.44778	21.6372	8.66347e-05	0.0062089	3	4	Up-regulated
Sus_scrofa___FAM20C	2.83942	4.84127	21.3103	8.71405e-05	0.0062089	3	4	Up-regulated
Sus_scrofa___ENSSSCG00000017754	2.56501	5.2779	21.5574	8.91811e-05	0.00629564	3	4	Up-regulated
Sus_scrofa___CDC20B	4.05566	3.99409	20.628	9.0803e-05	0.0063419	3	4	Up-regulated
Sus_scrofa___ADK	1.80593	7.23379	21.4227	9.2095e-05	0.00638349	3	4	Up-regulated
Sus_scrofa___DCDC1	1.92233	4.44781	21.2692	9.33272e-05	0.00643337	3	4	Up-regulated
Sus_scrofa___RPF2	1.73712	5.87351	21.3838	9.33754e-05	0.00643337	3	4	Up-regulated
Sus_scrofa___ENSSSCG00000031163	4.99595	1.9747	20.2765	9.42493e-05	0.00645914	3	4	Up-regulated
Sus_scrofa___SERPINE2	2.34554	9.28348	21.3167	9.45941e-05	0.00645914	3	4	Up-regulated
Sus_scrofa___DNAJC15	1.41218	5.53843	21.3249	9.50538e-05	0.00647127	3	4	Up-regulated
Sus_scrofa___VWA8	1.52175	6.77635	21.2821	9.57599e-05	0.00649565	3	4	Up-regulated
Sus_scrofa___PXK	1.23515	7.37237	21.2671	9.5978e-05	0.00649565	3	4	Up-regulated
Sus_scrofa___RSAD2	5.6425	6.53308	20.7023	9.65314e-05	0.00651388	3	4	Up-regulated
Sus_scrofa___OAS2	4.52155	8.6908	21.2169	9.75609e-05	0.00656405	3	4	Up-regulated
Sus_scrofa___EIF3J	1.45559	5.7038	21.1966	9.84958e-05	0.00660757	3	4	Up-regulated
Sus_scrofa___OSBP	1.49464	5.75002	21.1597	9.94812e-05	0.00665422	3	4	Up-regulated
Sus_scrofa___ENSSSCG00000023850	2.85095	5.30239	20.7545	0.000101517	0.00675105	3	4	Up-regulated
Sus_scrofa___AVIL	3.62324	3.98996	20.2044	0.000103156	0.00684019	3	4	Up-regulated
Sus_scrofa___TSHZ3	1.36584	7.7437	20.9558	0.000104886	0.00691492	3	4	Up-regulated
Sus_scrofa___FBXO24	3.46514	3.18493	19.924	0.000105601	0.00694215	3	4	Up-regulated
Sus_scrofa___PTP4A2	1.60242	7.11088	20.79	0.000110258	0.00716614	3	4	Up-regulated
Sus_scrofa___PPP1R3B	6.28023	1.77492	19.4951	0.000111816	0.00722647	3	4	Up-regulated
Sus_scrofa___PGRMC1	2.52171	4.84787	20.319	0.00011285	0.00724725	3	4	Up-regulated
Sus_scrofa___CSMD3	2.22944	3.89998	20.4263	0.000113044	0.00724725	3	4	Up-regulated
Sus_scrofa___PSMC1	1.72681	5.00051	20.6726	0.000113085	0.00724725	3	4	Up-regulated
Sus_scrofa___WDR89	1.93966	5.02961	20.576	0.000116159	0.00738236	3	4	Up-regulated
Sus_scrofa___DSCAM	2.41291	3.51897	20.0658	0.00011671	0.00739692	3	4	Up-regulated
Sus_scrofa___TXNDC11	1.2856	7.06599	20.466	0.000120927	0.00760117	3	4	Up-regulated
Sus_scrofa___ZNF654	1.81314	7.3735	20.3459	0.000125242	0.00780821	3	4	Up-regulated
Sus_scrofa___C12orf73	1.88013	4.35273	20.2908	0.000126003	0.0078344	3	4	Up-regulated
Sus_scrofa___POP1	2.21801	4.62294	19.9878	0.000130738	0.00804298	3	4	Up-regulated
Sus_scrofa___FARSA	2.64131	4.33796	19.7034	0.000131104	0.00804298	3	4	Up-regulated
Sus_scrofa___PLXNA4	1.85701	10.1023	20.1739	0.000131498	0.00804298	3	4	Up-regulated
Sus_scrofa___CHST9	4.68612	5.74494	19.927	0.000132598	0.0080695	3	4	Up-regulated
Sus_scrofa___ADAMTS9	2.20058	8.51533	20.053	0.000136281	0.00827168	3	4	Up-regulated
Sus_scrofa___SERPINE1	5.11716	8.77821	19.8771	0.000141061	0.00850485	3	4	Up-regulated
Sus_scrofa___ALS2	2.65541	5.26564	19.762	0.000144166	0.00863602	3	4	Up-regulated
Sus_scrofa___USP45	2.16609	4.98209	19.6363	0.000147715	0.00877983	3	4	Up-regulated
Sus_scrofa___PAK4	2.00544	4.42934	19.5525	0.000149312	0.00883108	3	4	Up-regulated
Sus_scrofa___SELENOM	1.71437	4.46375	19.6836	0.000149347	0.00883108	3	4	Up-regulated
Sus_scrofa___P2RX4	2.90422	3.67306	18.9783	0.000151426	0.00886267	3	4	Up-regulated
Sus_scrofa___USP53	2.58224	8.71076	19.5973	0.00015587	0.0090993	3	4	Up-regulated
Sus_scrofa___XPO5	1.43276	5.80183	19.6002	0.000156531	0.0090993	3	4	Up-regulated
Sus_scrofa___CMSS1	1.48879	9.28864	19.5791	0.000156659	0.0090993	3	4	Up-regulated
Sus_scrofa___C1RL	2.48625	5.43083	19.5791	0.000157476	0.00912367	3	4	Up-regulated
Sus_scrofa___ADAMTS3	4.74283	6.76884	19.4339	0.00015856	0.00912511	3	4	Up-regulated
Sus_scrofa___NBAS	1.29914	7.7359	19.5364	0.000158694	0.00912511	3	4	Up-regulated
Sus_scrofa___TSKU	1.81733	4.5937	19.5086	0.000160001	0.00915439	3	4	Up-regulated
Sus_scrofa___C1orf198	4.90749	5.48538	18.7439	0.000161101	0.00918025	3	4	Up-regulated
Sus_scrofa___DGKI	4.16315	5.29525	18.7574	0.000161972	0.00918505	3	4	Up-regulated
Sus_scrofa___NDUFAF6	1.87891	4.26003	19.3105	0.000165675	0.00930641	3	4	Up-regulated
Sus_scrofa___IGFBP4	2.49686	6.79115	19.3912	0.000166282	0.00930641	3	4	Up-regulated
Sus_scrofa___ENSSSCG00000031037	3.57214	3.40792	18.567	0.000172845	0.00957872	3	4	Up-regulated
Sus_scrofa___SBNO2	1.39631	6.6941	19.1597	0.000177775	0.00975951	3	4	Up-regulated
Sus_scrofa___PUS7	1.29884	7.35637	19.1486	0.000178194	0.00975951	3	4	Up-regulated
Sus_scrofa___PABPC1	1.24115	7.11784	19.1396	0.000178671	0.00976013	3	4	Up-regulated
Sus_scrofa___PRKAR2A	1.35052	7.69358	19.0478	0.000183614	0.00998257	3	4	Up-regulated
Sus_scrofa___MAP3K20	0.971487	8.85698	19.011	0.000185596	0.0100665	3	4	Up-regulated
Sus_scrofa___METTL16	1.34399	6.43995	18.9959	0.00018696	0.0100928	3	4	Up-regulated
Sus_scrofa___HIRA	1.22421	6.09638	18.9072	0.000192206	0.010321	3	4	Up-regulated
Sus_scrofa___YARS1	1.44301	5.74835	18.8968	0.000193031	0.0103233	3	4	Up-regulated
Sus_scrofa___RASL11B	3.73868	3.9087	18.0182	0.000200365	0.0106411	3	4	Up-regulated
Sus_scrofa___REEP3	1.06549	8.80642	18.7134	0.000203021	0.0107078	3	4	Up-regulated
Sus_scrofa___C18orf25	1.53057	6.54976	18.6997	0.000204569	0.0107199	3	4	Up-regulated
Sus_scrofa___SNX3	1.31945	5.8114	18.6689	0.000206812	0.0108084	3	4	Up-regulated
Sus_scrofa___SLC16A3	5.46847	3.44217	18.1333	0.000208845	0.0108542	3	4	Up-regulated
Sus_scrofa___ENSSSCG00000035570	1.63681	6.49203	18.6273	0.000209158	0.0108542	3	4	Up-regulated
Sus_scrofa___DTD2	2.33116	3.73448	18.1726	0.00020958	0.0108542	3	4	Up-regulated
Sus_scrofa___FEM1B	3.84747	2.96261	18.2124	0.000212628	0.0109872	3	4	Up-regulated
Sus_scrofa___R3HDM1	1.18992	7.67025	18.4149	0.000222373	0.0113447	3	4	Up-regulated
Sus_scrofa___DNAJC24	1.74288	5.36584	18.4073	0.00022238	0.0113447	3	4	Up-regulated
Sus_scrofa___ROR1	2.59816	10.1313	18.3608	0.000225987	0.0114554	3	4	Up-regulated
Sus_scrofa___SCFD2	1.11697	8.87532	18.3128	0.00022933	0.0115132	3	4	Up-regulated
Sus_scrofa___IDE	1.19334	6.76853	18.2528	0.000233924	0.0116672	3	4	Up-regulated
Sus_scrofa___TMEM165	1.53059	5.6061	18.2496	0.000234616	0.0116763	3	4	Up-regulated
Sus_scrofa___CUEDC2	2.18149	5.0048	18.2419	0.00023701	0.0117069	3	4	Up-regulated
Sus_scrofa___MX1	3.95641	7.74903	18.1991	0.00023827	0.0117309	3	4	Up-regulated
Sus_scrofa___NOCT	5.05253	4.89697	17.6189	0.000241451	0.0118368	3	4	Up-regulated
Sus_scrofa___ENSSSCG00000013366	2.40534	5.46831	18.1374	0.000242253	0.0118508	3	4	Up-regulated
Sus_scrofa___ENSSSCG00000002709	2.96534	4.02522	17.7599	0.000242977	0.0118609	3	4	Up-regulated
Sus_scrofa___CDC42EP3	5.086	5.61558	17.5654	0.000244193	0.0118949	3	4	Up-regulated
Sus_scrofa___EGLN3	5.43623	4.35064	17.6567	0.000245128	0.0119149	3	4	Up-regulated
Sus_scrofa___ENAH	2.23975	7.27037	18.0871	0.000246161	0.0119149	3	4	Up-regulated
Sus_scrofa___ISG15	6.24031	6.17269	17.4082	0.000246835	0.0119224	3	4	Up-regulated
Sus_scrofa___NAA40	2.77445	3.44933	17.3885	0.000250758	0.0120864	3	4	Up-regulated
Sus_scrofa___NFKBIZ	2.15803	8.30692	18.0013	0.000252427	0.0121414	3	4	Up-regulated
Sus_scrofa___ZNF3	3.13685	2.54213	17.0414	0.000259771	0.0123907	3	4	Up-regulated
Sus_scrofa___RPL31	1.30829	8.50961	17.8583	0.000263752	0.0125545	3	4	Up-regulated
Sus_scrofa___GADD45B	2.92474	5.5102	17.6682	0.0002715	0.0128169	3	4	Up-regulated
Sus_scrofa___ERO1A	1.98568	6.88721	17.7562	0.000272484	0.0128369	3	4	Up-regulated
Sus_scrofa___NFIL3	4.05083	5.65394	17.2179	0.000275066	0.0129059	3	4	Up-regulated
Sus_scrofa___ENSSSCG00000022295	1.45931	5.91728	17.7324	0.000275312	0.0129059	3	4	Up-regulated
Sus_scrofa___SLCO4A1	6.7164	2.35233	16.9762	0.000275635	0.0129059	3	4	Up-regulated
Sus_scrofa___DERL1	1.96812	5.62301	17.6872	0.000276539	0.0129219	3	4	Up-regulated
Sus_scrofa___UBAP2	0.983472	7.79284	17.6586	0.000280608	0.0130732	3	4	Up-regulated
Sus_scrofa___EPRS1	1.20664	6.55789	17.66	0.000280918	0.0130732	3	4	Up-regulated
Sus_scrofa___TBRG4	1.82197	5.02348	17.5558	0.000282178	0.0130914	3	4	Up-regulated
Sus_scrofa___GNPDA2	2.0785	5.39484	17.627	0.00028308	0.0130942	3	4	Up-regulated
Sus_scrofa___KANK2	1.77827	6.63329	17.6121	0.000285285	0.0131696	3	4	Up-regulated
Sus_scrofa___TSPAN15	3.40256	4.52409	17.3495	0.000286593	0.0132034	3	4	Up-regulated
Sus_scrofa___OASL	4.36297	3.05194	16.5947	0.000288129	0.0132211	3	4	Up-regulated
Sus_scrofa___CARNMT1	2.31565	4.66087	17.2547	0.000289597	0.0132619	3	4	Up-regulated
Sus_scrofa___ZNF697	2.55108	5.67524	17.5538	0.00029081	0.0132909	3	4	Up-regulated
Sus_scrofa___TTC27	1.83533	6.71001	17.5201	0.000294003	0.0133957	3	4	Up-regulated
Sus_scrofa___TBX3	2.44764	3.99313	17.3411	0.000294271	0.0133957	3	4	Up-regulated
Sus_scrofa___ALKBH2	5.97146	1.91131	16.8765	0.000296987	0.0134926	3	4	Up-regulated
Sus_scrofa___MDFIC	1.18356	7.73826	17.4578	0.000298728	0.0135449	3	4	Up-regulated
Sus_scrofa___SNAPC1	2.13787	6.02363	17.4273	0.000302933	0.0136815	3	4	Up-regulated
Sus_scrofa___UHRF1BP1	1.84988	5.5162	17.3905	0.00030663	0.013771	3	4	Up-regulated
Sus_scrofa___PDE4A	1.74209	4.72757	17.3539	0.000307031	0.013771	3	4	Up-regulated
Sus_scrofa___APH1A	2.73397	2.67154	16.564	0.000307916	0.013771	3	4	Up-regulated
Sus_scrofa___ACKR4	2.41532	4.76039	17.2555	0.000308881	0.0137873	3	4	Up-regulated
Sus_scrofa___TNK2	2.55748	4.90195	17.2119	0.000311953	0.0138973	3	4	Up-regulated
Sus_scrofa___SLC25A33	4.32325	3.94854	16.9602	0.000313952	0.0139593	3	4	Up-regulated
Papio_anubis_CHD4	4.00112	1.13678	15.6851	0.00031456	0.0139593	3	4	Up-regulated
Sus_scrofa___VCP	1.97118	5.25057	17.2774	0.000315757	0.0139854	3	4	Up-regulated
Sus_scrofa___ENSSSCG00000010968	2.27204	5.59094	17.2384	0.00031726	0.0140242	3	4	Up-regulated
Sus_scrofa___CKB	4.6921	2.0608	16.1336	0.000317858	0.0140242	3	4	Up-regulated
Sus_scrofa___MLLT11	4.80231	3.08622	16.8613	0.000319724	0.0140795	3	4	Up-regulated
Sus_scrofa___DPP3	1.72256	4.89407	17.1957	0.000323514	0.0142191	3	4	Up-regulated
Sus_scrofa___ENSSSCG00000046436	3.53727	3.50394	16.5288	0.000338533	0.014684	3	4	Up-regulated
Sus_scrofa___HSD17B6	6.08547	1.43178	15.8935	0.000339108	0.014684	3	4	Up-regulated
Sus_scrofa___MTCH2	2.2518	4.36034	16.7471	0.000340829	0.0147263	3	4	Up-regulated
Sus_scrofa___CCL2	2.44188	7.94803	16.9875	0.000346823	0.0149571	3	4	Up-regulated
Sus_scrofa___ASCC3	0.936355	8.38019	16.9294	0.000352705	0.0151492	3	4	Up-regulated
Sus_scrofa___UQCC1	1.51696	5.98897	16.9054	0.000356988	0.0152377	3	4	Up-regulated
Sus_scrofa___COL8A1	2.50559	11.2717	16.8773	0.000358541	0.0152616	3	4	Up-regulated
Sus_scrofa___YIPF2	1.38688	6.16987	16.8659	0.000361009	0.0153098	3	4	Up-regulated
Sus_scrofa___ENSSSCG00000003077	3.01193	3.48817	16.3148	0.000366114	0.0154692	3	4	Up-regulated
Sus_scrofa___SYN1	5.57891	3.68272	15.9968	0.000367768	0.0155105	3	4	Up-regulated
Sus_scrofa___PMAIP1	3.25466	3.35734	16.2048	0.000369587	0.0155586	3	4	Up-regulated
Sus_scrofa___KDM8	1.95099	4.56533	16.686	0.000371457	0.0156087	3	4	Up-regulated
Sus_scrofa___SNX18	2.87995	5.30064	16.6104	0.00037329	0.015657	3	4	Up-regulated
Sus_scrofa___ZBTB7C	2.80643	8.01599	16.7208	0.000376968	0.0157537	3	4	Up-regulated
Sus_scrofa___PAPPA	1.98821	8.7607	16.6469	0.000385897	0.0160207	3	4	Up-regulated
Sus_scrofa___GABRA2	3.7208	3.315	15.2881	0.00038615	0.0160207	3	4	Up-regulated
Sus_scrofa___EMC2	2.57617	5.89014	16.5947	0.000388569	0.0160919	3	4	Up-regulated
Sus_scrofa___SMIM14	1.14886	7.96257	16.6066	0.000390877	0.0161584	3	4	Up-regulated
Sus_scrofa___VDAC3	2.66408	4.19867	16.3978	0.000392585	0.016188	3	4	Up-regulated
Sus_scrofa___SLC7A1	2.81623	4.83629	16.2979	0.000403726	0.0165701	3	4	Up-regulated
Sus_scrofa___ENSSSCG00000035751	2.99416	6.67691	16.4972	0.000405968	0.0166324	3	4	Up-regulated
Sus_scrofa___NOP58	1.08752	7.24588	16.4279	0.00041404	0.0168473	3	4	Up-regulated
Sus_scrofa___WDR37	1.43441	6.44432	16.4308	0.000414505	0.0168473	3	4	Up-regulated
Sus_scrofa___MFSD2A	3.2622	2.46804	15.5037	0.000414886	0.0168473	3	4	Up-regulated
Sus_scrofa___THBS4	2.92654	7.40952	16.3838	0.000420167	0.0170016	3	4	Up-regulated
Sus_scrofa___ENSSSCG00000047553	3.7128	6.98747	16.3812	0.000422172	0.0170061	3	4	Up-regulated
Sus_scrofa___ENSSSCG00000028892	3.12149	2.47235	15.4709	0.000423244	0.0170061	3	4	Up-regulated
Sus_scrofa___ETV3	1.59858	4.52338	16.3027	0.000429477	0.0171945	3	4	Up-regulated
Sus_scrofa___PGPEP1	1.50349	5.73075	16.3192	0.000430181	0.0171945	3	4	Up-regulated
Sus_scrofa___HSD17B12	1.29933	6.48917	16.2971	0.00043267	0.0172639	3	4	Up-regulated
Papio_anubis_DDX3X	6.14129	1.62095	15.5353	0.000437371	0.0173709	3	4	Up-regulated
Sus_scrofa___EIF3I	1.53071	4.45853	16.195	0.00043995	0.0173709	3	4	Up-regulated
Sus_scrofa___CMPK2	3.99091	5.58411	16.041	0.000440938	0.0173709	3	4	Up-regulated
Sus_scrofa___HSP90B1	1.82934	6.32475	16.2358	0.000441714	0.0173709	3	4	Up-regulated
Sus_scrofa___ENSSSCG00000043835	1.94917	5.13671	16.237	0.000441887	0.0173709	3	4	Up-regulated
Sus_scrofa___HAO2	1.67032	5.52275	16.2344	0.000442165	0.0173709	3	4	Up-regulated
Sus_scrofa___SCGB1A1	6.0695	1.56486	15.0988	0.000446416	0.0174482	3	4	Up-regulated
Sus_scrofa___ENSSSCG00000000908	1.12217	5.99166	16.183	0.000449388	0.0175048	3	4	Up-regulated
Sus_scrofa___ZHX1	1.55848	4.97484	16.1573	0.000453502	0.0176351	3	4	Up-regulated
Sus_scrofa___ARNTL2	2.27288	6.62835	16.1426	0.000454915	0.0176601	3	4	Up-regulated
Sus_scrofa___EHD4	1.95764	6.34251	16.0796	0.000464208	0.0179298	3	4	Up-regulated
Sus_scrofa___ENSSSCG00000029347	2.44766	3.75032	15.7173	0.000466705	0.0179409	3	4	Up-regulated
Sus_scrofa___BZW2	3.00209	4.56195	15.6975	0.000466842	0.0179409	3	4	Up-regulated
Sus_scrofa___PRR11	3.07461	3.12705	15.2494	0.000475537	0.0181535	3	4	Up-regulated
Sus_scrofa___LAP3	1.55094	6.82695	15.9949	0.000476361	0.0181548	3	4	Up-regulated
Sus_scrofa___SACS	2.00903	4.05088	15.791	0.000478332	0.0181996	3	4	Up-regulated
Sus_scrofa___MYBPH	7.12976	2.70082	15.4673	0.000482666	0.0182736	3	4	Up-regulated
Sus_scrofa___EFL1	1.08364	6.76183	15.9278	0.000486886	0.018403	3	4	Up-regulated
Sus_scrofa___ADAR	1.53923	6.14709	15.9054	0.000491372	0.0184843	3	4	Up-regulated
Sus_scrofa___TRIM46	3.25921	3.0454	15.4824	0.000491453	0.0184843	3	4	Up-regulated
Sus_scrofa___MB21D2	1.20716	6.70233	15.8934	0.000492401	0.0184896	3	4	Up-regulated
Sus_scrofa___PSMD14	1.38415	6.77086	15.871	0.000496272	0.0185896	3	4	Up-regulated
Sus_scrofa___ZNHIT6	1.52461	8.35233	15.8498	0.000498945	0.0185896	3	4	Up-regulated
Sus_scrofa___ENC1	2.34566	4.16701	15.6265	0.000504177	0.0187174	3	4	Up-regulated
Sus_scrofa___ME1	3.81425	5.81267	15.5694	0.000517188	0.0190463	3	4	Up-regulated
Sus_scrofa___EPSTI1	3.46678	7.60684	15.7337	0.000519365	0.0190958	3	4	Up-regulated
Sus_scrofa___KIF12	4.38663	2.67313	14.9779	0.000520721	0.0191056	3	4	Up-regulated
Sus_scrofa___UPP1	3.565	2.46186	14.7165	0.000521296	0.0191056	3	4	Up-regulated
Sus_scrofa___ENSSSCG00000012566	2.21712	4.43146	15.5924	0.000527113	0.019288	3	4	Up-regulated
Sus_scrofa___CARMIL1	1.22251	8.76518	15.6216	0.000537549	0.0195726	3	4	Up-regulated
Sus_scrofa___CPM	2.1369	8.06394	15.6186	0.000538305	0.0195726	3	4	Up-regulated
Sus_scrofa___PSMB7	1.10985	6.00392	15.6195	0.000539513	0.0195855	3	4	Up-regulated
Sus_scrofa___TMEM243	2.24165	4.52885	15.5261	0.000540797	0.0196011	3	4	Up-regulated
Sus_scrofa___NRIP1	1.06023	7.93087	15.5925	0.000542768	0.0196415	3	4	Up-regulated
Sus_scrofa___ENSSSCG00000005307	4.51721	1.16393	14.3089	0.000543855	0.0196499	3	4	Up-regulated
Sus_scrofa___phTBM	7.68852	2.89248	15.6473	0.000548705	0.0197797	3	4	Up-regulated
Sus_scrofa___DNAJC11	1.26039	6.06004	15.5667	0.000549172	0.0197797	3	4	Up-regulated
Sus_scrofa___STIL	2.2258	3.85153	15.3255	0.000551206	0.0198218	3	4	Up-regulated
Sus_scrofa___ENSSSCG00000048052	4.07694	1.91202	14.8953	0.000553342	0.0198361	3	4	Up-regulated
Sus_scrofa___MYNN	0.934505	5.53611	15.5354	0.000555367	0.0198361	3	4	Up-regulated
Sus_scrofa___ADM	3.29434	6.32186	15.3917	0.00056609	0.020105	3	4	Up-regulated
Sus_scrofa___CCSER2	0.985804	7.31985	15.449	0.00056914	0.020182	3	4	Up-regulated
Sus_scrofa___C1orf105	5.00055	2.03836	14.9235	0.000574028	0.0202614	3	4	Up-regulated
Sus_scrofa___SRPK2	1.00102	8.78674	15.4068	0.000576895	0.0203313	3	4	Up-regulated
Sus_scrofa___LIN52	2.71478	3.58859	14.9462	0.000583012	0.0204214	3	4	Up-regulated
Sus_scrofa___UHRF1	2.81216	2.75712	14.1492	0.000592808	0.0206385	3	4	Up-regulated
Sus_scrofa___FSTL3	3.00319	4.62407	14.9241	0.000596767	0.0207135	3	4	Up-regulated
Papio_anubis_LRMDA	7.15232	1.60007	15.2512	0.000600222	0.0207792	3	4	Up-regulated
Sus_scrofa___SRXN1	4.95825	3.25126	15.0664	0.00060047	0.0207792	3	4	Up-regulated
Sus_scrofa___ENSSSCG00000008984	4.55558	3.1943	14.7483	0.000603345	0.0208472	3	4	Up-regulated
Sus_scrofa___ATAD1	1.19397	7.86031	15.2073	0.00061634	0.0211687	3	4	Up-regulated
Sus_scrofa___BTBD1	1.46587	6.09691	15.1911	0.000621835	0.021262	3	4	Up-regulated
Sus_scrofa___NOLC1	1.7579	4.72047	15.1208	0.000627164	0.0213487	3	4	Up-regulated
Sus_scrofa___S100A11	1.67568	4.79371	15.1453	0.000628246	0.0213539	3	4	Up-regulated
Sus_scrofa___ENSSSCG00000032067	2.46984	4.55018	14.8161	0.000630695	0.0214054	3	4	Up-regulated
Sus_scrofa___MX2	4.32078	8.12529	15.1297	0.000634304	0.021416	3	4	Up-regulated
Sus_scrofa___TTC7A	1.46524	6.72792	15.1214	0.000634741	0.021416	3	4	Up-regulated
Sus_scrofa___P4HB	2.57077	4.92446	15.0216	0.000644181	0.0216511	3	4	Up-regulated
Sus_scrofa___ENSSSCG00000011355	3.66899	2.63991	14.4708	0.000644541	0.0216511	3	4	Up-regulated
Sus_scrofa___ABHD2	2.16611	5.88119	15.0762	0.00064658	0.0216737	3	4	Up-regulated
Sus_scrofa___PLAUR	1.59084	5.76798	15.0694	0.000647647	0.0216737	3	4	Up-regulated
Sus_scrofa___HRH1	2.78266	6.36014	15.0496	0.000648046	0.0216737	3	4	Up-regulated
Sus_scrofa___ETV6	1.15153	9.33932	15.0299	0.000653675	0.0218301	3	4	Up-regulated
Sus_scrofa___TMEM108	1.81237	3.64454	14.8783	0.000659325	0.0219385	3	4	Up-regulated
Sus_scrofa___MIPOL1	1.11686	7.23026	14.9909	0.000662572	0.0219385	3	4	Up-regulated
Sus_scrofa___RTN2	2.10377	4.23347	14.8672	0.000665796	0.0220106	3	4	Up-regulated
Sus_scrofa___LITAF	1.13952	7.44331	14.9606	0.000669126	0.0220598	3	4	Up-regulated
Sus_scrofa___ERRFI1	3.06825	7.4179	14.951	0.000673078	0.0221556	3	4	Up-regulated
Papio_anubis_GAS7	6.37787	1.50376	15.701	0.000674691	0.0221768	3	4	Up-regulated
Sus_scrofa___SEL1L2	4.25005	1.89023	14.2189	0.000678796	0.0222237	3	4	Up-regulated
Sus_scrofa___NT5DC2	4.59998	2.78231	14.8295	0.00068522	0.0223846	3	4	Up-regulated
Sus_scrofa___ENSSSCG00000013696	1.60929	5.08486	14.8756	0.000686865	0.0223846	3	4	Up-regulated
Sus_scrofa___TADA2A	0.999532	6.53571	14.8624	0.000692073	0.0225223	3	4	Up-regulated
Sus_scrofa___FLVCR1	1.7407	5.07063	14.8351	0.00069521	0.0225924	3	4	Up-regulated
Sus_scrofa___MRTO4	1.63875	4.94408	14.8193	0.00069772	0.0226418	3	4	Up-regulated
Sus_scrofa___MRPL35	2.90949	3.63695	14.4579	0.000700773	0.0226768	3	4	Up-regulated
Sus_scrofa___RDH10	2.20857	7.12291	14.7745	0.000713056	0.0230094	3	4	Up-regulated
Sus_scrofa___TDRP	2.70384	4.03457	14.5044	0.000725961	0.0233341	3	4	Up-regulated
Sus_scrofa___GYG2	2.3199	5.26668	14.7269	0.000727024	0.0233341	3	4	Up-regulated
Sus_scrofa___CSKMT	5.75263	2.60991	15.0513	0.000727188	0.0233341	3	4	Up-regulated
Sus_scrofa___RUNX2	2.25115	7.55414	14.7002	0.000730352	0.0233834	3	4	Up-regulated
Sus_scrofa___H1-3	2.51529	3.15611	13.6778	0.000730764	0.0233834	3	4	Up-regulated
Sus_scrofa___CANX	1.18496	6.74856	14.6588	0.00074108	0.0236476	3	4	Up-regulated
Sus_scrofa___PLEKHA4	1.66143	5.69978	14.6588	0.000743115	0.0236796	3	4	Up-regulated
Sus_scrofa___PIM3	3.41148	5.00661	14.2424	0.000748153	0.0237412	3	4	Up-regulated
Sus_scrofa___ROR2	2.82282	7.87738	14.6121	0.000752309	0.0237744	3	4	Up-regulated
Sus_scrofa___STK40	1.89333	4.80476	14.5704	0.000756506	0.0238414	3	4	Up-regulated
Sus_scrofa___POLR1G	2.33663	3.22471	14.1171	0.000761465	0.0239319	3	4	Up-regulated
Sus_scrofa___NOD2	2.4128	3.81406	14.3184	0.00076589	0.0240381	3	4	Up-regulated
Sus_scrofa___CSTF2	1.69553	4.39463	14.4796	0.000766999	0.02404	3	4	Up-regulated
Sus_scrofa___GPHN	0.774357	9.60778	14.5184	0.000776101	0.0242393	3	4	Up-regulated
Sus_scrofa___ICAM2	1.24415	6.29024	14.5225	0.000776528	0.0242393	3	4	Up-regulated
Sus_scrofa___FARP1	1.24829	9.34358	14.499	0.000781241	0.0243202	3	4	Up-regulated
Sus_scrofa___LDHC	4.04527	2.1934	13.3913	0.000785777	0.0243855	3	4	Up-regulated
Sus_scrofa___MON1A	5.74177	2.04318	14.1988	0.000791187	0.0244969	3	4	Up-regulated
Sus_scrofa___WARS1	1.68339	5.1555	14.4608	0.0007948	0.0245756	3	4	Up-regulated
Sus_scrofa___ENSSSCG00000027270	2.78715	4.38414	14.0088	0.000800722	0.024659	3	4	Up-regulated
Sus_scrofa___AIPL1	5.86855	1.49681	13.9316	0.000801873	0.0246614	3	4	Up-regulated
Sus_scrofa___TTC39B	2.0119	5.84519	14.4216	0.000804789	0.0247179	3	4	Up-regulated
Sus_scrofa___SIAH2	2.20683	4.15197	14.1634	0.00080994	0.0248108	3	4	Up-regulated
Sus_scrofa___PBLD	1.65664	4.59214	14.3723	0.000811059	0.0248108	3	4	Up-regulated
Sus_scrofa___GINS4	2.53462	3.3787	14.0764	0.000814503	0.024883	3	4	Up-regulated
Sus_scrofa___FRA10AC1	1.27852	4.96018	14.3839	0.000816708	0.0249148	3	4	Up-regulated
Sus_scrofa___PDCD11	1.8146	4.71442	14.3273	0.000817717	0.0249148	3	4	Up-regulated
Sus_scrofa___CLU	3.84522	4.98934	14.0566	0.000825051	0.0250964	3	4	Up-regulated
Sus_scrofa___CFAP100	3.55005	2.93535	13.4904	0.000825863	0.0250964	3	4	Up-regulated
Papio_anubis_CPQ	5.99946	1.07287	14.1378	0.000828372	0.0251393	3	4	Up-regulated
Sus_scrofa___STT3B	0.999063	7.58783	14.3092	0.000833459	0.025227	3	4	Up-regulated
Sus_scrofa___ZNF404	2.20927	3.64279	14.0182	0.000835858	0.0252663	3	4	Up-regulated
Sus_scrofa___ZNFX1	2.04713	6.96181	14.283	0.000841738	0.0254105	3	4	Up-regulated
Papio_anubis_GAB2	6.41689	1.23943	13.6373	0.000843995	0.0254326	3	4	Up-regulated
Sus_scrofa___TAF6L	2.21185	3.91791	14.1785	0.000844688	0.0254326	3	4	Up-regulated
Sus_scrofa___ENSSSCG00000003253	1.67445	6.51627	14.2662	0.000848036	0.0255	3	4	Up-regulated
Sus_scrofa___APBA3	2.29318	3.5037	13.9647	0.000851918	0.025557	3	4	Up-regulated
Sus_scrofa___PDSS2	1.26326	6.12773	14.2457	0.000854072	0.0255809	3	4	Up-regulated
Sus_scrofa___TRIM69	5.84043	1.04091	13.4689	0.000858418	0.0256025	3	4	Up-regulated
Sus_scrofa___STAT3	0.953607	8.85649	14.218	0.000859499	0.0256025	3	4	Up-regulated
Sus_scrofa___BPNT1	1.56372	4.54296	14.1932	0.000860098	0.0256025	3	4	Up-regulated
Sus_scrofa___IQCH	2.64485	3.24839	13.8322	0.000871471	0.025789	3	4	Up-regulated
Sus_scrofa___PHLDA1	6.62561	2.5744	14.2649	0.000873527	0.0257932	3	4	Up-regulated
Sus_scrofa___TANC1	1.3426	7.87208	14.1498	0.000879821	0.0258722	3	4	Up-regulated
Sus_scrofa___MYCBP2	0.927652	9.68611	14.1464	0.000880712	0.0258722	3	4	Up-regulated
Sus_scrofa___GPR161	1.77949	7.28034	14.108	0.00089293	0.0261326	3	4	Up-regulated
Sus_scrofa___PDIA3	0.886048	6.7231	14.0977	0.000896224	0.0261604	3	4	Up-regulated
Sus_scrofa___UBXN4	0.988505	6.91244	14.0761	0.000902804	0.0262978	3	4	Up-regulated
Sus_scrofa___TPM4	1.69206	6.88621	14.0771	0.000903225	0.0262978	3	4	Up-regulated
Sus_scrofa___NRG3	2.25636	3.64301	13.7738	0.00090996	0.0263334	3	4	Up-regulated
Sus_scrofa___ADORA2A	1.67604	4.82827	14.0589	0.000911268	0.0263334	3	4	Up-regulated
Sus_scrofa___FEM1C	1.74403	5.10067	14.0544	0.000911334	0.0263334	3	4	Up-regulated
Sus_scrofa___TERB2	4.20364	1.23134	14.1032	0.000914209	0.0263382	3	4	Up-regulated
Sus_scrofa___GALK2	1.69329	9.23338	14.0351	0.000914945	0.0263382	3	4	Up-regulated
Sus_scrofa___PTPN2	1.0775	7.1055	14.0133	0.000922207	0.0264995	3	4	Up-regulated
Sus_scrofa___EGR2	3.22416	3.29722	13.5874	0.000922975	0.0264995	3	4	Up-regulated
Sus_scrofa___SEC22B	1.07643	6.22361	14.0115	0.000924108	0.0264995	3	4	Up-regulated
Papio_anubis_DAPK1	4.08717	1.59219	13.115	0.000926303	0.0264995	3	4	Up-regulated
Sus_scrofa___TPK1	2.24674	5.44117	13.9657	0.000932172	0.0264995	3	4	Up-regulated
Sus_scrofa___LPCAT3	1.88658	4.82492	13.9158	0.000932334	0.0264995	3	4	Up-regulated
Sus_scrofa___TAGLN	1.5401	6.637	13.985	0.000933253	0.0264995	3	4	Up-regulated
Sus_scrofa___SUCLG2	1.01106	7.77094	13.9662	0.000936959	0.0265391	3	4	Up-regulated
Sus_scrofa___ENSSSCG00000011559	1.54835	5.17058	13.9681	0.000940028	0.0265927	3	4	Up-regulated
Sus_scrofa___YAP1	1.51585	8.39788	13.9532	0.000941171	0.0265927	3	4	Up-regulated
Sus_scrofa___NRBF2	1.14393	5.50133	13.9617	0.000942508	0.0265977	3	4	Up-regulated
Sus_scrofa___AMD1	2.83108	4.65937	13.7766	0.000943936	0.0266053	3	4	Up-regulated
Sus_scrofa___SARDH	3.12144	3.67983	13.6172	0.000948577	0.0266848	3	4	Up-regulated
Sus_scrofa___GJC1	1.36031	6.70328	13.9304	0.000949083	0.0266848	3	4	Up-regulated
Sus_scrofa___CSRNP1	2.43583	4.50207	13.7183	0.000952233	0.0267318	3	4	Up-regulated
Sus_scrofa___JADE1	2.66838	6.96634	13.918	0.000954502	0.0267318	3	4	Up-regulated
Sus_scrofa___CRLS1	1.62226	5.33283	13.9079	0.000955555	0.0267318	3	4	Up-regulated
Sus_scrofa___ENSSSCG00000013862	1.39272	5.12005	13.9126	0.000957066	0.0267318	3	4	Up-regulated
Sus_scrofa___PHC2	1.13983	7.02148	13.9034	0.000957746	0.0267318	3	4	Up-regulated
Sus_scrofa___CAPN15	1.70972	4.08623	13.8482	0.000963085	0.026836	3	4	Up-regulated
Sus_scrofa___MRPL15	2.51422	3.70376	13.5002	0.000964335	0.026836	3	4	Up-regulated
Sus_scrofa___HERC5	3.38281	7.27155	13.888	0.000964989	0.026836	3	4	Up-regulated
Sus_scrofa___POLE	2.81176	3.20912	13.3779	0.000971489	0.0268803	3	4	Up-regulated
Sus_scrofa___PARP9	2.25872	4.75156	13.8623	0.000971591	0.0268803	3	4	Up-regulated
Sus_scrofa___TAMM41	1.82564	4.44689	13.8136	0.000971813	0.0268803	3	4	Up-regulated
Sus_scrofa___GLS	0.918021	8.97882	13.8578	0.000972438	0.0268803	3	4	Up-regulated
Sus_scrofa___OTUD7B	0.94212	6.64045	13.8529	0.000974961	0.0269176	3	4	Up-regulated
Papio_anubis_JARID2	6.45116	1.48303	13.0784	0.00097866	0.0269873	3	4	Up-regulated
Sus_scrofa___VEGFA	3.75087	5.07498	13.7062	0.000979972	0.0269891	3	4	Up-regulated
Sus_scrofa___GABRG3	3.56958	2.4413	13.412	0.000996264	0.0273086	3	4	Up-regulated
Sus_scrofa___CS	2.02946	4.90028	13.6085	0.00103111	0.0280873	3	4	Up-regulated
Sus_scrofa___DIAPH3	2.83811	5.79641	13.7018	0.00103202	0.0280873	3	4	Up-regulated
Sus_scrofa___SPATA48	4.75248	2.05659	13.0871	0.00104399	0.0283343	3	4	Up-regulated
Sus_scrofa___SFRP1	2.37698	8.38708	13.6472	0.00104603	0.0283343	3	4	Up-regulated
Sus_scrofa___MAP3K8	1.85322	6.65276	13.6465	0.0010482	0.0283595	3	4	Up-regulated
Sus_scrofa___ENSSSCG00000006719	3.43887	2.69209	12.7833	0.00105079	0.028396	3	4	Up-regulated
Sus_scrofa___SFXN4	1.29588	5.6747	13.639	0.00105225	0.028402	3	4	Up-regulated
Sus_scrofa___CCL11	5.62967	2.73605	12.8216	0.00105371	0.0284079	3	4	Up-regulated
Sus_scrofa___FAM78B	3.86939	6.59684	13.5708	0.00107335	0.0287015	3	4	Up-regulated
Sus_scrofa___MANF	2.18013	3.94031	13.4415	0.00107627	0.0287461	3	4	Up-regulated
Sus_scrofa___ENSSSCG00000033766	5.61948	1.76576	13.1254	0.0010818	0.0288268	3	4	Up-regulated
Sus_scrofa___GSS	1.89882	3.59054	13.2976	0.00110318	0.0292603	3	4	Up-regulated
Sus_scrofa___MAGI1	1.4771	9.6943	13.4834	0.00110713	0.0293312	3	4	Up-regulated
Sus_scrofa___CNDP1	3.10463	2.2742	12.7888	0.00111141	0.0293768	3	4	Up-regulated
Sus_scrofa___UBA5	0.86244	6.30714	13.4526	0.00112057	0.0295127	3	4	Up-regulated
Sus_scrofa___TIMM44	2.24767	3.95221	13.2212	0.00112576	0.0295127	3	4	Up-regulated
Sus_scrofa___TRAP1	1.15311	5.36142	13.4438	0.00112709	0.0295127	3	4	Up-regulated
Sus_scrofa___ENSSSCG00000011676	1.82709	5.87394	13.4352	0.00112806	0.0295127	3	4	Up-regulated
Sus_scrofa___HTR2C	2.94297	2.5927	13.0105	0.00112807	0.0295127	3	4	Up-regulated
Sus_scrofa___MTERF1	1.40267	4.69989	13.431	0.00112813	0.0295127	3	4	Up-regulated
Sus_scrofa___TICRR	3.27738	3.23119	12.9621	0.00113562	0.029649	3	4	Up-regulated
Sus_scrofa___USP25	0.91682	8.46881	13.3758	0.00114949	0.0299011	3	4	Up-regulated
Sus_scrofa___SLC35E1	1.22915	5.52313	13.3827	0.00115112	0.0299097	3	4	Up-regulated
Sus_scrofa___CCN1	3.11896	6.76292	13.2945	0.00115564	0.0299929	3	4	Up-regulated
Sus_scrofa___POLQ	2.97761	3.58119	13.0378	0.00116342	0.0301267	3	4	Up-regulated
Sus_scrofa___NDUFS2	1.49419	4.82053	13.3361	0.00116707	0.0301809	3	4	Up-regulated
Sus_scrofa___ST8SIA6	3.09335	1.85752	12.3606	0.00116945	0.0301809	3	4	Up-regulated
Sus_scrofa___SPOCK1	3.48114	4.4738	13.2046	0.00117365	0.0301825	3	4	Up-regulated
Sus_scrofa___HIPK3	1.17182	7.37443	13.2976	0.00118189	0.0302634	3	4	Up-regulated
Sus_scrofa___HES6	2.36941	3.40188	13.0314	0.00118508	0.0303113	3	4	Up-regulated
Sus_scrofa___KPNA7	1.43925	5.33758	13.2671	0.00119818	0.0305444	3	4	Up-regulated
Papio_anubis_ENSPANG00000009679	4.97878	1.31717	12.3173	0.00120225	0.0306141	3	4	Up-regulated
Sus_scrofa___COX4I1	2.66809	4.38861	13.1844	0.00120989	0.0307403	3	4	Up-regulated
Sus_scrofa___FADD	2.3672	2.66227	12.7771	0.00121277	0.0307795	3	4	Up-regulated
Sus_scrofa___GCN1	1.0952	6.29684	13.2004	0.00122413	0.0309992	3	4	Up-regulated
Sus_scrofa___PTK6	3.63169	1.64814	12.2194	0.00122898	0.0310449	3	4	Up-regulated
Sus_scrofa___FSD1L	1.04572	6.69975	13.1827	0.00123099	0.0310449	3	4	Up-regulated
Sus_scrofa___ENSSSCG00000000703	2.97239	1.65023	12.2525	0.00123135	0.0310449	3	4	Up-regulated
Sus_scrofa___SERPINH1	1.45915	6.28511	13.1668	0.00124013	0.0311976	3	4	Up-regulated
Sus_scrofa___RNF19B	1.58203	4.91651	13.1347	0.00125648	0.0315241	3	4	Up-regulated
Sus_scrofa___SLC16A1	2.91647	5.0726	12.9577	0.00125723	0.0315241	3	4	Up-regulated
Sus_scrofa___PKM	2.53386	5.33636	13.1034	0.00126192	0.031572	3	4	Up-regulated
Sus_scrofa___PRMT7	1.27668	6.25713	13.1121	0.00126312	0.031572	3	4	Up-regulated
Sus_scrofa___NDUFA4L2	1.98281	2.38757	12.5172	0.00126785	0.0316522	3	4	Up-regulated
Sus_scrofa___ITGA5	1.85443	6.88306	13.0932	0.00127191	0.031719	3	4	Up-regulated
Sus_scrofa___IARS1	0.853906	7.80391	13.0553	0.00128658	0.0319537	3	4	Up-regulated
Sus_scrofa___ISG12(A)	3.77832	6.87071	13.0506	0.0012869	0.0319537	3	4	Up-regulated
Sus_scrofa___MPI	3.61273	2.32788	12.4059	0.00129148	0.032033	3	4	Up-regulated
Sus_scrofa___E2F8	6.65732	1.82797	12.4185	0.00129732	0.0320737	3	4	Up-regulated
Sus_scrofa___QRSL1	2.82561	3.45252	12.6831	0.00132759	0.0325928	3	4	Up-regulated
Sus_scrofa___TRNP1	4.82896	2.6756	12.9133	0.00132902	0.0325928	3	4	Up-regulated
Sus_scrofa___TSFM	1.80897	4.29304	12.8978	0.00132968	0.0325928	3	4	Up-regulated
Sus_scrofa___MAGT1	0.853038	7.03119	12.9493	0.00133592	0.0327107	3	4	Up-regulated
Sus_scrofa___PSMA3	1.06388	6.54317	12.9435	0.0013395	0.032729	3	4	Up-regulated
Sus_scrofa___MYO1D	1.97427	9.46342	12.9409	0.00133952	0.032729	3	4	Up-regulated
Sus_scrofa___PEDS1	1.67805	4.20487	12.8934	0.0013447	0.0327858	3	4	Up-regulated
Sus_scrofa___CD9	2.36234	4.31169	12.9216	0.0013467	0.0327998	3	4	Up-regulated
Sus_scrofa___TRAF3	0.964608	7.07262	12.921	0.00134943	0.0328315	3	4	Up-regulated
Sus_scrofa___KANK4	2.59926	3.16676	12.6928	0.00135357	0.032895	3	4	Up-regulated
Papio_anubis_USP24	5.865	1.18705	12.7064	0.00135585	0.032895	3	4	Up-regulated
Sus_scrofa___KLHL32	3.07962	2.66487	12.221	0.00136398	0.0330102	3	4	Up-regulated
Sus_scrofa___SPIRE2	2.42548	3.79349	12.6176	0.00138201	0.0332712	3	4	Up-regulated
Sus_scrofa___SMYD2	1.4121	5.06724	12.7851	0.00141734	0.0340147	3	4	Up-regulated
Sus_scrofa___PANK2	1.63011	5.2879	12.7672	0.00141966	0.0340348	3	4	Up-regulated
Sus_scrofa___ENSSSCG00000047029	4.1628	1.82418	12.0106	0.00142582	0.0340755	3	4	Up-regulated
Sus_scrofa___C2orf76	1.24106	4.66955	12.7601	0.00143236	0.0341964	3	4	Up-regulated
Sus_scrofa___WSCD2	4.38933	5.13606	12.4412	0.00144997	0.0344732	3	4	Up-regulated
Sus_scrofa___MORN4	3.36041	2.73121	12.3711	0.00145159	0.0344759	3	4	Up-regulated
Sus_scrofa___ENSSSCG00000038852	3.07947	2.07713	12.152	0.00145833	0.0346003	3	4	Up-regulated
Sus_scrofa___CIBAR1	1.30798	5.90715	12.6998	0.00146331	0.0346825	3	4	Up-regulated
Sus_scrofa___ENSSSCG00000041378	3.27192	1.35385	11.636	0.00147281	0.0348716	3	4	Up-regulated
Sus_scrofa___TRIB2	2.48366	6.14116	12.6655	0.00148216	0.0350209	3	4	Up-regulated
Sus_scrofa___TXNL1	1.65754	5.83002	12.6182	0.00150734	0.0353971	3	4	Up-regulated
Sus_scrofa___UBE3D	1.4487	6.17641	12.6034	0.00151443	0.0354547	3	4	Up-regulated
Sus_scrofa___ENSSSCG00000011290	3.05272	3.88646	12.2848	0.00152184	0.0355619	3	4	Up-regulated
Sus_scrofa___OSGIN1	3.3024	3.5466	12.2625	0.00152211	0.0355619	3	4	Up-regulated
Sus_scrofa___USP18	2.78888	6.70482	12.5679	0.00153399	0.035694	3	4	Up-regulated
Sus_scrofa___CDKN1A	2.87122	3.6641	12.261	0.00153981	0.0357932	3	4	Up-regulated
Sus_scrofa___ENSSSCG00000027124	3.50042	3.13371	12.2709	0.00155972	0.0361605	3	4	Up-regulated
Sus_scrofa___MTO1	1.18876	5.14616	12.5244	0.00156034	0.0361605	3	4	Up-regulated
Papio_anubis_ARPC2	5.81816	1.281	11.9512	0.00156446	0.0361828	3	4	Up-regulated
Sus_scrofa___NUFIP2	0.809604	7.92595	12.5002	0.00156752	0.0362077	3	4	Up-regulated
Sus_scrofa___PML	1.92145	7.20301	12.4952	0.00157109	0.0362108	3	4	Up-regulated
Sus_scrofa___ACTN3	5.17513	1.11966	11.6673	0.00157328	0.0362108	3	4	Up-regulated
Sus_scrofa___KLF10	1.69447	5.31209	12.4822	0.00158	0.0363225	3	4	Up-regulated
Sus_scrofa___PSMB2	1.08252	7.08265	12.4764	0.00158165	0.0363241	3	4	Up-regulated
Sus_scrofa___ENSSSCG00000043628	5.39745	3.8655	12.5399	0.00158648	0.0363985	3	4	Up-regulated
Sus_scrofa___NCBP1	2.11907	5.87899	12.4673	0.00159137	0.0364464	3	4	Up-regulated
Sus_scrofa___DPY19L2	5.32971	1.61491	11.8997	0.00159174	0.0364464	3	4	Up-regulated
Papio_anubis_PFKFB3	6.12387	1.18085	12.4724	0.00159537	0.0364931	3	4	Up-regulated
Sus_scrofa___NMT2	1.40553	6.75782	12.4279	0.00160957	0.036766	3	4	Up-regulated
Sus_scrofa___PIAS2	0.974426	6.82845	12.4202	0.00161422	0.036766	3	4	Up-regulated
Sus_scrofa___THAP9	3.15135	3.65936	12.1051	0.00161592	0.036766	3	4	Up-regulated
Sus_scrofa___GPD2	1.74895	6.18299	12.4101	0.00162363	0.036766	3	4	Up-regulated
Sus_scrofa___TK1	2.52148	3.72878	12.2625	0.00162686	0.036766	3	4	Up-regulated
Sus_scrofa___ANGPT4	2.69315	6.38864	12.3931	0.00162807	0.036766	3	4	Up-regulated
Sus_scrofa___CCT3	1.15947	5.57443	12.4002	0.00163011	0.036766	3	4	Up-regulated
Sus_scrofa___ZNF23	2.47739	3.32084	12.0746	0.00163868	0.0367954	3	4	Up-regulated
Sus_scrofa___IRF7	2.88678	3.80158	12.0497	0.00163963	0.0367954	3	4	Up-regulated
Sus_scrofa___CACNA1D	1.87751	5.12727	12.3832	0.0016405	0.0367954	3	4	Up-regulated
Sus_scrofa___PAK1IP1	1.79914	4.40444	12.3316	0.00164066	0.0367954	3	4	Up-regulated
Sus_scrofa___STAC2	3.00752	1.59425	11.5083	0.00164372	0.0368281	3	4	Up-regulated
Sus_scrofa___PFKFB4	3.02768	4.61526	12.3194	0.00165898	0.0370975	3	4	Up-regulated
Sus_scrofa___LARS2	1.01829	5.9344	12.3339	0.00166752	0.0372521	3	4	Up-regulated
Sus_scrofa___AMH	1.65299	4.84769	12.3082	0.00167655	0.0373447	3	4	Up-regulated
Sus_scrofa___NMD3	1.59826	5.99579	12.3001	0.00168864	0.0375776	3	4	Up-regulated
Sus_scrofa___ENSSSCG00000013593	1.68516	4.20517	12.2464	0.00170763	0.03789	3	4	Up-regulated
Sus_scrofa___PSMD5	1.45952	4.74214	12.2632	0.0017107	0.0379213	3	4	Up-regulated
Sus_scrofa___MUL1	1.51488	4.26248	12.1274	0.00171434	0.0379516	3	4	Up-regulated
Sus_scrofa___CACNA1I	3.32608	1.69661	11.4891	0.00171537	0.0379516	3	4	Up-regulated
Sus_scrofa___PDHX	1.11373	5.55651	12.2382	0.00172727	0.0381413	3	4	Up-regulated
Sus_scrofa___LDLR	1.81419	6.31363	12.2287	0.00173175	0.0382035	3	4	Up-regulated
Sus_scrofa___CCDC126	1.68526	5.21154	12.2254	0.00173562	0.0382521	3	4	Up-regulated
Sus_scrofa___NAA50	1.35681	6.12523	12.2062	0.00174656	0.0384193	3	4	Up-regulated
Sus_scrofa___RCOR2	5.63892	1.9483	12.1192	0.00175703	0.0385019	3	4	Up-regulated
Sus_scrofa___STYXL1	6.02438	1.66181	12.2511	0.0017594	0.0385171	3	4	Up-regulated
Sus_scrofa___NXF1	0.992166	6.10818	12.1506	0.0017807	0.0389462	3	4	Up-regulated
Sus_scrofa___MRPS35	1.43615	5.39312	12.1348	0.00178922	0.0390329	3	4	Up-regulated
Sus_scrofa___RMI1	2.68829	3.31918	11.8145	0.00178977	0.0390329	3	4	Up-regulated
Sus_scrofa___ENSSSCG00000038066	5.7695	1.11229	11.8204	0.0017982	0.0391423	3	4	Up-regulated
Sus_scrofa___ERC1	1.43213	9.22675	12.0911	0.00181691	0.0395123	3	4	Up-regulated
Sus_scrofa___SLC10A7	0.968135	7.49856	12.0801	0.00182449	0.0396085	3	4	Up-regulated
Sus_scrofa___FBXO30	2.00874	5.34892	12.0463	0.00183278	0.0397043	3	4	Up-regulated
Sus_scrofa___ENSSSCG00000038009	2.35239	3.83976	11.7649	0.00183786	0.0397043	3	4	Up-regulated
Sus_scrofa___TTC23	2.50762	4.27927	11.831	0.00184534	0.039791	3	4	Up-regulated
Sus_scrofa___DNAJB1	3.18534	3.19965	11.7725	0.0018496	0.0398454	3	4	Up-regulated
Sus_scrofa___TSR1	1.79169	4.82275	12.0248	0.00185233	0.0398667	3	4	Up-regulated
Sus_scrofa___CRK	0.783783	8.22453	12.0223	0.00186303	0.0400434	3	4	Up-regulated
Sus_scrofa___MYO1H	2.32203	4.17787	11.8666	0.0018725	0.0401057	3	4	Up-regulated
Sus_scrofa___BAALC	2.61334	4.28026	11.938	0.00187254	0.0401057	3	4	Up-regulated
Sus_scrofa___CDA	2.18759	3.55887	11.8486	0.00187392	0.0401057	3	4	Up-regulated
Sus_scrofa___RPP30	3.17406	4.13299	11.8951	0.00187764	0.0401479	3	4	Up-regulated
Sus_scrofa___PCYT1A	1.11271	6.43083	11.9753	0.00189712	0.0404513	3	4	Up-regulated
Sus_scrofa___CERS4	1.84742	5.76112	11.9557	0.00191002	0.0406508	3	4	Up-regulated
Sus_scrofa___SMIM2	5.97033	1.06371	11.6027	0.00193948	0.0411685	3	4	Up-regulated
Sus_scrofa___RAB5A	0.803385	6.75549	11.9049	0.00194547	0.0412522	3	4	Up-regulated
Sus_scrofa___TRPC4	2.95788	3.20815	11.421	0.00195066	0.0412854	3	4	Up-regulated
Sus_scrofa___CEMIP	4.9718	7.24179	11.8379	0.00195369	0.0412854	3	4	Up-regulated
Sus_scrofa___KIF18A	2.26112	4.00079	11.7576	0.00198276	0.041811	3	4	Up-regulated
Sus_scrofa___ZNF317	1.34657	4.38422	11.8085	0.0020021	0.0421009	3	4	Up-regulated
Sus_scrofa___CLCA1	2.74041	4.56365	11.7701	0.00200292	0.0421009	3	4	Up-regulated
Sus_scrofa___TMEM45A	1.16839	7.1603	11.8236	0.00200384	0.0421009	3	4	Up-regulated
Sus_scrofa___BOK	2.549	2.15817	11.1925	0.00201291	0.0422283	3	4	Up-regulated
Sus_scrofa___C7H6orf125	1.74251	4.34044	11.7121	0.00201472	0.0422283	3	4	Up-regulated
Sus_scrofa___RBKS	1.16497	6.09687	11.8117	0.00201585	0.0422283	3	4	Up-regulated
Sus_scrofa___UGP2	2.15593	8.29138	11.8048	0.00201759	0.0422283	3	4	Up-regulated
Sus_scrofa___MICAL1	1.55116	3.49341	11.7312	0.00202831	0.042382	3	4	Up-regulated
Sus_scrofa___PKP1	2.37874	1.65311	10.9122	0.00203058	0.0423908	3	4	Up-regulated
Sus_scrofa___PIF1	5.60528	1.08708	11.5525	0.00204365	0.0424968	3	4	Up-regulated
Sus_scrofa___PRMT1	1.5045	5.01409	11.7668	0.00204699	0.0425014	3	4	Up-regulated
Sus_scrofa___CDCP1	4.14688	2.78288	11.1543	0.0020588	0.0426111	3	4	Up-regulated
Sus_scrofa___YPEL2	2.2918	7.08575	11.7506	0.0020597	0.0426111	3	4	Up-regulated
Sus_scrofa___BNC2	0.788576	10.8327	11.7423	0.00206383	0.0426581	3	4	Up-regulated
Sus_scrofa___ENSSSCG00000003989	1.54165	5.4401	11.7381	0.00206925	0.042697	3	4	Up-regulated
Sus_scrofa___TYW3	2.13377	3.43622	11.4599	0.00206944	0.042697	3	4	Up-regulated
Sus_scrofa___MTX2	1.11837	5.99037	11.7102	0.00209319	0.0431095	3	4	Up-regulated
Sus_scrofa___RNF41	1.42202	5.25085	11.7035	0.00209716	0.0431525	3	4	Up-regulated
Sus_scrofa___EIF2AK2	2.22943	8.39508	11.6827	0.00210982	0.0433355	3	4	Up-regulated
Sus_scrofa___SZRD1	0.940096	6.07798	11.6783	0.00211607	0.0433847	3	4	Up-regulated
Sus_scrofa___NDUFAF5	2.07558	4.12926	11.5133	0.00212111	0.0434118	3	4	Up-regulated
Sus_scrofa___SLC25A15	1.42409	5.04299	11.6619	0.00212808	0.0434248	3	4	Up-regulated
Sus_scrofa___TMED1	1.62893	3.23219	11.5136	0.00212955	0.0434248	3	4	Up-regulated
Sus_scrofa___PTK7	1.24276	6.55146	11.6528	0.00213524	0.0434248	3	4	Up-regulated
Sus_scrofa___ACOT4	1.27416	5.55823	11.6393	0.00214985	0.043534	3	4	Up-regulated
Sus_scrofa___ZMAT1	3.66125	2.36578	11.2177	0.00215283	0.0435558	3	4	Up-regulated
Sus_scrofa___AIFM2	2.4295	3.16511	11.3413	0.00215484	0.0435581	3	4	Up-regulated
Sus_scrofa___ASB1	1.37585	4.43315	11.616	0.00215828	0.0435893	3	4	Up-regulated
Sus_scrofa___TENM1	3.30731	5.34423	11.5446	0.00216845	0.0437561	3	4	Up-regulated
Sus_scrofa___YARS2	1.43542	5.08459	11.607	0.0021759	0.0438151	3	4	Up-regulated
Sus_scrofa___FUT11	3.18683	3.14695	11.2808	0.00219199	0.0439876	3	4	Up-regulated
Sus_scrofa___PPWD1	1.11311	5.07399	11.5873	0.00219334	0.0439876	3	4	Up-regulated
Sus_scrofa___RRP9	2.14018	3.2367	11.2883	0.00220832	0.0442106	3	4	Up-regulated
Sus_scrofa___BCAR1	1.53758	4.78959	11.5551	0.00221353	0.0442415	3	4	Up-regulated
Sus_scrofa___TRAK2	2.07611	4.98961	11.4864	0.00222312	0.0443214	3	4	Up-regulated
Sus_scrofa___ST6GAL2	2.1813	5.93592	11.5439	0.00222469	0.0443214	3	4	Up-regulated
Sus_scrofa___ACSL5	1.05943	6.28453	11.5374	0.00222843	0.0443214	3	4	Up-regulated
Sus_scrofa___CHSY3	1.2585	9.41428	11.5338	0.00222871	0.0443214	3	4	Up-regulated
Sus_scrofa___UBC	1.92641	5.82641	11.5156	0.00224926	0.0446022	3	4	Up-regulated
Sus_scrofa___NT5DC1	1.13502	6.59059	11.5088	0.00225244	0.0446268	3	4	Up-regulated
Sus_scrofa___AGMO	1.69061	6.09267	11.5067	0.00225461	0.0446312	3	4	Up-regulated
Sus_scrofa___ENSSSCG00000031462	1.1157	8.00644	11.5003	0.0022568	0.0446361	3	4	Up-regulated
Sus_scrofa___ENSSSCG00000002351	3.72726	1.97996	10.838	0.00227619	0.0449204	3	4	Up-regulated
Sus_scrofa___TSPO	1.76596	4.29099	11.4599	0.00227886	0.0449204	3	4	Up-regulated
Sus_scrofa___KCNQ1	2.23574	5.62714	11.4828	0.00227901	0.0449204	3	4	Up-regulated
Sus_scrofa___MDM2	0.91198	7.14894	11.4667	0.00228522	0.0450041	3	4	Up-regulated
Sus_scrofa___SPIRE1	1.77421	5.89809	11.4518	0.00230374	0.045291	3	4	Up-regulated
Sus_scrofa___SMYD5	2.50584	3.23287	11.1608	0.00231078	0.0453906	3	4	Up-regulated
Sus_scrofa___ENSSSCG00000046704	3.22527	4.90395	11.3007	0.00231889	0.0455109	3	4	Up-regulated
Sus_scrofa___CLCN5	0.838135	7.30849	11.3975	0.00234482	0.0458238	3	4	Up-regulated
Sus_scrofa___CFAP44	3.69816	1.94862	10.8452	0.00235068	0.0458602	3	4	Up-regulated
Sus_scrofa___ENSSSCG00000010006	2.39879	2.40061	10.844	0.00235925	0.0459884	3	4	Up-regulated
Sus_scrofa___EPHA1	2.71613	2.77487	11.0369	0.00236137	0.0459907	3	4	Up-regulated
Sus_scrofa___SLC2A5	2.97828	1.88277	10.7724	0.00236702	0.0460225	3	4	Up-regulated
Sus_scrofa___ENSSSCG00000011307	3.86348	1.90012	11.0217	0.00237156	0.0460327	3	4	Up-regulated
Sus_scrofa___DNAJA3	1.18093	5.26274	11.3615	0.0023823	0.0462022	3	4	Up-regulated
Sus_scrofa___ENSSSCG00000035000	2.57457	3.62733	11.1612	0.00239807	0.0463713	3	4	Up-regulated
Sus_scrofa___TLE1	1.77851	5.93847	11.3408	0.00240029	0.0463713	3	4	Up-regulated
Sus_scrofa___FAM104A	1.2761	4.21099	11.3313	0.00240128	0.0463713	3	4	Up-regulated
Sus_scrofa___KLHL26	1.70386	4.76498	11.3275	0.00240386	0.0463713	3	4	Up-regulated
Sus_scrofa___FAM111A	1.36923	5.8129	11.3311	0.00240927	0.0464114	3	4	Up-regulated
Sus_scrofa___DARS1	0.884051	7.27187	11.3064	0.00242559	0.046638	3	4	Up-regulated
Sus_scrofa___VPS37A	1.45785	5.32688	11.3078	0.00242714	0.046638	3	4	Up-regulated
Sus_scrofa___PEX11G	3.22624	2.35907	11.0227	0.00243201	0.0466803	3	4	Up-regulated
Sus_scrofa___ETV4	2.09953	4.82291	11.2921	0.00243898	0.0467481	3	4	Up-regulated
Sus_scrofa___ENSSSCG00000007554	1.62419	4.66864	11.2607	0.00244693	0.0468487	3	4	Up-regulated
Sus_scrofa___GFPT1	1.03976	6.55029	11.2829	0.00244831	0.0468487	3	4	Up-regulated
Sus_scrofa___USO1	0.907199	7.66251	11.2167	0.00250795	0.0475423	3	4	Up-regulated
Sus_scrofa___SLC25A13	1.06758	7.09729	11.2161	0.00250901	0.0475423	3	4	Up-regulated
Sus_scrofa___ENSSSCG00000049674	3.45188	1.64547	10.4854	0.00251545	0.047579	3	4	Up-regulated
Sus_scrofa___DMAC2	1.58429	4.60249	11.2071	0.00251714	0.047579	3	4	Up-regulated
Sus_scrofa___IFIH1	2.12834	6.97029	11.1972	0.00252801	0.0476672	3	4	Up-regulated
Sus_scrofa___DNAJC1	1.01657	8.63145	11.188	0.00253469	0.0477249	3	4	Up-regulated
Sus_scrofa___UMPS	0.87809	5.44517	11.1949	0.0025357	0.0477249	3	4	Up-regulated
Sus_scrofa___ACSL4	1.13443	8.84231	11.1807	0.00254163	0.0477973	3	4	Up-regulated
Sus_scrofa___LTBP2	1.54448	7.69649	11.1788	0.00254372	0.0477974	3	4	Up-regulated
Sus_scrofa___ENSSSCG00000040103	1.51223	4.47389	11.164	0.00254686	0.0478172	3	4	Up-regulated
Sus_scrofa___ENSSSCG00000029160	3.4343	4.42659	10.8478	0.00256621	0.0480635	3	4	Up-regulated
Sus_scrofa___FBXO42	0.970843	7.29582	11.1555	0.00256627	0.0480635	3	4	Up-regulated
Sus_scrofa___RAB3GAP1	1.6317	5.82459	11.1584	0.0025708	0.04807	3	4	Up-regulated
Sus_scrofa___STIP1	2.70993	3.56119	10.884	0.00257385	0.0480878	3	4	Up-regulated
Sus_scrofa___CBLL1	1.4097	5.24096	11.1331	0.0025942	0.0483498	3	4	Up-regulated
Sus_scrofa___ENSSSCG00000006206	0.984091	7.24925	11.1049	0.00261547	0.0485884	3	4	Up-regulated
Sus_scrofa___ERG	2.29766	7.28489	11.1029	0.0026181	0.048598	3	4	Up-regulated
Sus_scrofa___CGAS	2.0297	4.18962	11.0607	0.00262827	0.0486686	3	4	Up-regulated
Sus_scrofa___ERH	1.68158	4.01365	10.9727	0.00264539	0.0489159	3	4	Up-regulated
Sus_scrofa___ENSSSCG00000041264	1.88132	3.17863	10.8779	0.00264802	0.0489159	3	4	Up-regulated
Sus_scrofa___ENSSSCG00000040820	2.53702	2.27226	10.5267	0.00265045	0.0489214	3	4	Up-regulated
Sus_scrofa___MFSD12	1.66204	4.25074	11.0594	0.0026594	0.0490026	3	4	Up-regulated
Sus_scrofa___EPHX4	6.21573	1.12854	10.7675	0.00266294	0.0490026	3	4	Up-regulated
Sus_scrofa___FRMD8	1.26593	4.75431	11.0565	0.0026757	0.0491897	3	4	Up-regulated
Sus_scrofa___SMARCD3	1.84657	4.92273	10.9884	0.0026931	0.0494455	3	4	Up-regulated
Sus_scrofa___IFIT1	2.35581	6.40623	11.0321	0.00269393	0.0494455	3	4	Up-regulated
Sus_scrofa___CCDC97	1.66346	3.63915	10.9472	0.00270519	0.0496124	3	4	Up-regulated
Sus_scrofa___ENSSSCG00000039723	5.88156	1.10494	10.7455	0.00271295	0.0496883	3	4	Up-regulated
Sus_scrofa___CTNND2	2.08793	3.52729	10.8623	0.00271366	0.0496883	3	4	Up-regulated
Sus_scrofa___NMRAL1	1.67609	4.4601	11.0039	0.00271707	0.0497111	3	4	Up-regulated
Sus_scrofa___MRPL45	2.52024	2.90409	10.6675	0.00271967	0.049719	3	4	Up-regulated
Sus_scrofa___ZC3H12C	1.6363	6.24946	10.9954	0.00272927	0.0498548	3	4	Up-regulated
Sus_scrofa___SPARCL1	-2.81874	8.66659	66.7682	1.28919e-08	3.91617e-05	3	4	Down-regulated
Sus_scrofa___ABCA8	-3.99208	9.41694	64.7776	1.71172e-08	3.91617e-05	3	4	Down-regulated
Sus_scrofa___CA10	-3.95237	7.46129	64.7915	1.71872e-08	3.91617e-05	3	4	Down-regulated
Sus_scrofa___TMEFF2	-4.01848	7.89071	57.0267	5.55937e-08	0.000102162	3	4	Down-regulated
Sus_scrofa___NOX5	-5.40558	4.36836	50.9191	5.78872e-08	0.000102162	3	4	Down-regulated
Sus_scrofa___PCSK6	-2.67226	9.39442	54.9129	7.72054e-08	0.000126523	3	4	Down-regulated
Sus_scrofa___SCN7A	-3.61681	4.29849	51.0126	1.05082e-07	0.000150681	3	4	Down-regulated
Sus_scrofa___LEPR	-4.09015	3.5046	43.8495	1.30217e-07	0.000165976	3	4	Down-regulated
Sus_scrofa___KLHL13	-3.9498	6.60688	49.8235	1.83153e-07	0.000202722	3	4	Down-regulated
Sus_scrofa___SLC6A20	-3.48555	4.83211	47.076	3.03767e-07	0.000261351	3	4	Down-regulated
Sus_scrofa___PLCB4	-3.35881	9.41474	44.4697	4.74645e-07	0.000375509	3	4	Down-regulated
Sus_scrofa___KAZN	-3.11513	9.24697	43.0482	6.20837e-07	0.000426799	3	4	Down-regulated
Sus_scrofa___SGSM1	-2.80224	5.66643	42.2525	7.33954e-07	0.000426799	3	4	Down-regulated
Sus_scrofa___SYT9	-3.12774	4.6651	42.3659	7.44103e-07	0.000426799	3	4	Down-regulated
Sus_scrofa___ARHGAP21	-1.24949	8.78196	41.4334	8.48125e-07	0.000474599	3	4	Down-regulated
Sus_scrofa___RPS6KA5	-2.14067	6.55763	41.2378	8.83634e-07	0.000482696	3	4	Down-regulated
Sus_scrofa___FNBP1	-1.4614	7.74695	40.8147	9.58072e-07	0.000511187	3	4	Down-regulated
Sus_scrofa___TFDP2	-1.28259	8.22412	40.6018	9.99116e-07	0.000520971	3	4	Down-regulated
Sus_scrofa___FNDC5	-3.48437	3.4071	38.6241	1.19054e-06	0.000566305	3	4	Down-regulated
Sus_scrofa___PRKCB	-2.31182	4.90851	39.8264	1.20947e-06	0.000566305	3	4	Down-regulated
Sus_scrofa___ENSSSCG00000032896	-4.07025	3.46802	33.5845	1.62699e-06	0.000691467	3	4	Down-regulated
Sus_scrofa___COL15A1	-2.61822	8.95621	37.9027	1.7253e-06	0.000691467	3	4	Down-regulated
Sus_scrofa___CEP112	-1.61722	7.7735	37.8791	1.7343e-06	0.000691467	3	4	Down-regulated
Sus_scrofa___ENSSSCG00000047920	-2.45028	5.47737	37.6839	1.83887e-06	0.000715071	3	4	Down-regulated
Sus_scrofa___ADAM22	-3.98002	7.33057	36.9845	2.09499e-06	0.000775246	3	4	Down-regulated
Sus_scrofa___PTPRD	-3.08582	8.57094	36.6224	2.25509e-06	0.000806853	3	4	Down-regulated
Sus_scrofa___TNS3	-2.67962	7.27806	36.6186	2.2595e-06	0.000806853	3	4	Down-regulated
Sus_scrofa___WNT5A	-2.91203	3.82452	36.497	2.2859e-06	0.000806853	3	4	Down-regulated
Sus_scrofa___ENSSSCG00000036029	-6.76034	1.66121	32.9191	2.32502e-06	0.000808225	3	4	Down-regulated
Sus_scrofa___JAM2	-2.14371	5.52952	36.1265	2.53336e-06	0.000830741	3	4	Down-regulated
Sus_scrofa___PSAT1	-3.83955	4.21818	35.592	2.60704e-06	0.000830741	3	4	Down-regulated
Sus_scrofa___TTC21B	-1.44766	7.64244	35.8215	2.67421e-06	0.00083859	3	4	Down-regulated
Sus_scrofa___SEMA6D	-2.47216	6.53543	35.7829	2.70477e-06	0.00083859	3	4	Down-regulated
Sus_scrofa___MYL7	-6.93415	4.13694	30.1696	3.11646e-06	0.000947145	3	4	Down-regulated
Sus_scrofa___RHOH	-7.55566	2.21174	34.9179	3.39272e-06	0.0010109	3	4	Down-regulated
Sus_scrofa___MTUS2	-4.59527	6.9263	34.5467	3.59675e-06	0.00104456	3	4	Down-regulated
Sus_scrofa___SESTD1	-1.49489	9.37767	34.2421	3.76656e-06	0.00106931	3	4	Down-regulated
Sus_scrofa___YTHDC2	-1.21167	7.39616	34.2339	3.77518e-06	0.00106931	3	4	Down-regulated
Sus_scrofa___ENSSSCG00000031640	-8.66428	2.86037	31.4991	3.87148e-06	0.00108321	3	4	Down-regulated
Sus_scrofa___ABCA9	-2.36084	8.00626	33.4669	4.47348e-06	0.00122185	3	4	Down-regulated
Sus_scrofa___ENSSSCG00000009125	-1.85264	9.64813	32.6735	5.34434e-06	0.00134742	3	4	Down-regulated
Sus_scrofa___ABCG2	-1.54299	7.35107	32.6011	5.43561e-06	0.00135553	3	4	Down-regulated
Sus_scrofa___ENSSSCG00000023479	-2.5113	6.42071	32.0626	6.17032e-06	0.00150602	3	4	Down-regulated
Sus_scrofa___CSF1R	-5.41643	3.07584	27.3089	6.45521e-06	0.00152363	3	4	Down-regulated
Sus_scrofa___ENSSSCG00000043817	-1.64366	8.53204	31.7748	6.56029e-06	0.00152363	3	4	Down-regulated
Sus_scrofa___ARHGAP15	-2.78717	4.28873	31.7686	6.56499e-06	0.00152363	3	4	Down-regulated
Sus_scrofa___MPP2	-3.97702	2.8941	28.6884	6.66114e-06	0.00152363	3	4	Down-regulated
Sus_scrofa___VAV1	-4.30408	2.52618	27.2407	6.91955e-06	0.00155642	3	4	Down-regulated
Sus_scrofa___FGD2	-7.8986	2.48409	28.564	7.36929e-06	0.00162105	3	4	Down-regulated
Sus_scrofa___PSIP1	-1.46172	6.48929	31.1933	7.51492e-06	0.00162656	3	4	Down-regulated
Sus_scrofa___TMEM272	-4.0816	2.34038	25.8046	7.8928e-06	0.00167671	3	4	Down-regulated
Sus_scrofa___WRAP73	-1.625	5.52986	30.4357	9.03127e-06	0.00183367	3	4	Down-regulated
Sus_scrofa___NCOA7	-1.59507	7.51826	29.8918	1.01938e-05	0.0020337	3	4	Down-regulated
Sus_scrofa___ENSSSCG00000029771	-1.82634	7.97664	29.659	1.07745e-05	0.00213103	3	4	Down-regulated
Sus_scrofa___ENSSSCG00000035525	-2.49492	4.41383	29.2243	1.17185e-05	0.00224047	3	4	Down-regulated
Sus_scrofa___RAC3	-2.45065	3.39712	28.5094	1.3616e-05	0.00247931	3	4	Down-regulated
Sus_scrofa___STON2	-1.80758	8.20405	28.5744	1.40016e-05	0.00251601	3	4	Down-regulated
Sus_scrofa___LCP2	-4.8843	2.64445	24.7005	1.44516e-05	0.00255048	3	4	Down-regulated
Sus_scrofa___UNKL	-1.43592	7.06453	28.2386	1.52095e-05	0.0026132	3	4	Down-regulated
Sus_scrofa___SNCAIP	-2.51617	4.52101	28.2694	1.54578e-05	0.0026132	3	4	Down-regulated
Sus_scrofa___SLC35F3	-4.90531	5.90951	28.2441	1.54687e-05	0.0026132	3	4	Down-regulated
Sus_scrofa___ENSSSCG00000012520	-2.57439	3.65923	27.9001	1.6272e-05	0.00271183	3	4	Down-regulated
Sus_scrofa___KMO	-3.3542	2.76827	25.8102	1.6666e-05	0.00271183	3	4	Down-regulated
Sus_scrofa___PIK3R5	-2.93072	2.6252	24.8177	1.69506e-05	0.00273872	3	4	Down-regulated
Sus_scrofa___ENSSSCG00000028944	-3.54597	4.02224	26.9263	1.80134e-05	0.00284351	3	4	Down-regulated
Sus_scrofa___ART4	-3.26181	7.04001	27.368	1.88866e-05	0.00289206	3	4	Down-regulated
Sus_scrofa___GAMT	-4.26056	1.84082	23.9257	2.02018e-05	0.00299025	3	4	Down-regulated
Sus_scrofa___XKR8	-2.75351	2.88385	25.253	2.035e-05	0.00299288	3	4	Down-regulated
Sus_scrofa___HTR7	-3.72218	3.07821	24.6989	2.09008e-05	0.00302016	3	4	Down-regulated
Sus_scrofa___TMOD2	-1.97993	4.568	27.0054	2.10873e-05	0.00302379	3	4	Down-regulated
Sus_scrofa___HSDL1	-2.50672	3.06912	26.1871	2.19875e-05	0.00306952	3	4	Down-regulated
Sus_scrofa___SHMT1	-3.53139	6.19348	26.7793	2.20752e-05	0.00306952	3	4	Down-regulated
Sus_scrofa___GPR137B	-1.57075	4.9826	26.7524	2.2326e-05	0.00308078	3	4	Down-regulated
Sus_scrofa___VAMP5	-1.72708	5.59367	26.644	2.27743e-05	0.00311018	3	4	Down-regulated
Sus_scrofa___EPB41L2	-1.11777	9.7787	26.5776	2.30161e-05	0.00312461	3	4	Down-regulated
Sus_scrofa___SLC46A3	-2.89077	6.53911	26.514	2.34799e-05	0.00312678	3	4	Down-regulated
Sus_scrofa___DLG2	-3.22739	9.31861	26.4808	2.35909e-05	0.00312678	3	4	Down-regulated
Sus_scrofa___DDC	-5.16123	2.77558	23.7456	2.37207e-05	0.00312678	3	4	Down-regulated
Sus_scrofa___ENSSSCG00000040016	-5.20478	2.39614	24.6554	2.41229e-05	0.003143	3	4	Down-regulated
Sus_scrofa___CNTN3	-2.31614	7.72803	26.2663	2.49281e-05	0.00316173	3	4	Down-regulated
Sus_scrofa___FARP2	-1.51793	6.21355	26.2498	2.50706e-05	0.00316173	3	4	Down-regulated
Sus_scrofa___BMF	-3.45934	3.37571	25.1534	2.50811e-05	0.00316173	3	4	Down-regulated
Sus_scrofa___HPGD	-3.63142	8.28796	26.0928	2.6057e-05	0.00321411	3	4	Down-regulated
Sus_scrofa___ISCU	-3.89826	3.49112	24.892	2.707e-05	0.0032869	3	4	Down-regulated
Sus_scrofa___NTN5	-2.9081	2.90399	24.5563	2.74523e-05	0.0032869	3	4	Down-regulated
Sus_scrofa___CD163	-7.60149	4.77277	23.3808	2.74694e-05	0.0032869	3	4	Down-regulated
Sus_scrofa___APCDD1	-3.11834	3.11458	24.8316	2.77149e-05	0.0032869	3	4	Down-regulated
Sus_scrofa___PRRC2B	-0.981371	8.41809	25.605	2.95416e-05	0.00338259	3	4	Down-regulated
Sus_scrofa___NRK	-3.21444	4.75134	25.5161	3.07676e-05	0.00347704	3	4	Down-regulated
Sus_scrofa___LY86	-7.34934	1.88805	23.695	3.09164e-05	0.00347704	3	4	Down-regulated
Sus_scrofa___ENSSSCG00000013754	-2.48999	5.60646	25.3972	3.15111e-05	0.00350951	3	4	Down-regulated
Sus_scrofa___PRKAG2	-1.86349	8.2977	25.1357	3.33824e-05	0.00362983	3	4	Down-regulated
Sus_scrofa___LDLRAD3	-1.27043	8.76403	24.8772	3.57223e-05	0.00382598	3	4	Down-regulated
Sus_scrofa___REV1	-2.00595	9.28269	24.828	3.6187e-05	0.00382598	3	4	Down-regulated
Sus_scrofa___CMTM8	-2.05998	6.74751	24.7207	3.72609e-05	0.00385979	3	4	Down-regulated
Sus_scrofa___ABCA6	-2.50864	9.64763	24.4619	3.98639e-05	0.00401139	3	4	Down-regulated
Sus_scrofa___SLC6A4	-3.76746	5.38359	24.191	4.32351e-05	0.00423907	3	4	Down-regulated
Sus_scrofa___PDE1A	-1.58707	9.67953	24.0443	4.45582e-05	0.00433177	3	4	Down-regulated
Sus_scrofa___ITIH5	-2.59235	8.16928	23.9353	4.58893e-05	0.00438482	3	4	Down-regulated
Sus_scrofa___NR3C1	-0.994203	8.61569	23.9208	4.60594e-05	0.00438482	3	4	Down-regulated
Sus_scrofa___SMARCA2	-1.19888	7.73179	23.8969	4.63628e-05	0.00439546	3	4	Down-regulated
Sus_scrofa___MTURN	-1.87244	5.25406	23.8744	4.70566e-05	0.00444288	3	4	Down-regulated
Sus_scrofa___DIS3L2	-1.03574	8.423	23.7277	4.85175e-05	0.00450663	3	4	Down-regulated
Sus_scrofa___DUSP11	-1.17147	6.86046	23.6829	4.9135e-05	0.00452393	3	4	Down-regulated
Sus_scrofa___ATG4C	-1.6102	6.10068	23.6514	4.96353e-05	0.00453357	3	4	Down-regulated
Sus_scrofa___TOP3A	-1.84407	7.53869	23.5672	5.06813e-05	0.00457787	3	4	Down-regulated
Sus_scrofa___ENSSSCG00000015664	-2.07658	6.49712	23.4901	5.18588e-05	0.00464764	3	4	Down-regulated
Sus_scrofa___VSIG10	-1.65567	5.53245	23.3469	5.40992e-05	0.00479227	3	4	Down-regulated
Sus_scrofa___ANGPTL1	-2.50102	3.60379	22.9014	5.44885e-05	0.00480819	3	4	Down-regulated
Sus_scrofa___RALGPS2	-1.81346	6.07328	23.201	5.61413e-05	0.00489752	3	4	Down-regulated
Sus_scrofa___HPSE2	-2.87995	6.52295	23.1388	5.70638e-05	0.00492947	3	4	Down-regulated
Sus_scrofa___UACA	-1.38104	8.65273	23.0438	5.84217e-05	0.00498279	3	4	Down-regulated
Sus_scrofa___SUSD4	-3.16856	4.68655	23.036	5.96472e-05	0.00504647	3	4	Down-regulated
Sus_scrofa___DISC1	-0.960142	7.83193	22.9573	5.98283e-05	0.00504647	3	4	Down-regulated
Sus_scrofa___HPS3	-1.50259	5.4323	22.9378	6.05004e-05	0.00507012	3	4	Down-regulated
Sus_scrofa___SEL1L3	-2.50948	5.21203	22.7849	6.34355e-05	0.00523526	3	4	Down-regulated
Sus_scrofa___STAB1	-4.07582	3.36821	21.4222	6.67369e-05	0.00546837	3	4	Down-regulated
Sus_scrofa___SLC25A27	-1.87585	6.08434	22.4903	6.81988e-05	0.0055306	3	4	Down-regulated
Sus_scrofa___GLCCI1	-1.9404	6.14897	22.4657	6.86535e-05	0.0055306	3	4	Down-regulated
Sus_scrofa___FYB1	-2.39951	3.1071	20.9576	6.87829e-05	0.0055306	3	4	Down-regulated
Sus_scrofa___CCDC171	-1.74395	5.26358	22.4684	6.89426e-05	0.0055306	3	4	Down-regulated
Sus_scrofa___ENSSSCG00000022039	-1.61816	4.94598	22.4148	7.0339e-05	0.00561285	3	4	Down-regulated
Sus_scrofa___KIDINS220	-1.06024	7.70462	22.3648	7.04572e-05	0.00561285	3	4	Down-regulated
Sus_scrofa___NQO2	-1.71531	5.07644	22.3529	7.14293e-05	0.00565105	3	4	Down-regulated
Sus_scrofa___EFHC1	-1.53916	5.42446	22.1847	7.46116e-05	0.00576437	3	4	Down-regulated
Sus_scrofa___CDKL1	-1.69928	6.77363	22.1321	7.52207e-05	0.00576437	3	4	Down-regulated
Sus_scrofa___ENSSSCG00000048841	-3.13965	2.31677	19.5871	7.54124e-05	0.00576437	3	4	Down-regulated
Sus_scrofa___GLUL	-3.92483	5.78435	22.1708	7.5513e-05	0.00576437	3	4	Down-regulated
Sus_scrofa___ENSSSCG00000041213	-3.16398	5.39651	22.1231	7.58767e-05	0.00576437	3	4	Down-regulated
Sus_scrofa___ENSSSCG00000014314	-2.44973	3.77714	21.8801	7.72432e-05	0.00580648	3	4	Down-regulated
Sus_scrofa___NAA60	-1.12542	6.05993	22.0322	7.74433e-05	0.00580648	3	4	Down-regulated
Sus_scrofa___CDK9	-1.36606	6.53343	22.0142	7.77622e-05	0.00581139	3	4	Down-regulated
Sus_scrofa___ZNF704	-1.74842	8.44089	21.9781	7.84754e-05	0.00584565	3	4	Down-regulated
Sus_scrofa___FAM102B	-1.66488	6.48111	21.8148	8.22619e-05	0.00604915	3	4	Down-regulated
Sus_scrofa___ALDH1A1	-2.45529	5.9038	21.8017	8.30563e-05	0.00608805	3	4	Down-regulated
Sus_scrofa___DAZAP1	-1.40236	7.17809	21.72	8.4407e-05	0.00614778	3	4	Down-regulated
Sus_scrofa___HDAC4	-1.30326	7.076	21.7071	8.47236e-05	0.00615131	3	4	Down-regulated
Sus_scrofa___GFRA1	-3.65602	5.73718	21.6585	8.68779e-05	0.0062089	3	4	Down-regulated
Sus_scrofa___RNF180	-1.8472	8.10054	21.566	8.81378e-05	0.00626051	3	4	Down-regulated
Sus_scrofa___MOK	-1.90382	4.52206	21.6172	8.84933e-05	0.00626636	3	4	Down-regulated
Sus_scrofa___RHOJ	-1.87811	8.56666	21.4762	9.04034e-05	0.0063419	3	4	Down-regulated
Sus_scrofa___RNF150	-3.51551	6.50727	21.4804	9.0572e-05	0.0063419	3	4	Down-regulated
Sus_scrofa___CDK5RAP2	-1.70981	5.87822	21.4686	9.09421e-05	0.0063419	3	4	Down-regulated
Sus_scrofa___KDM2B	-1.44475	5.88796	21.4286	9.18627e-05	0.00638349	3	4	Down-regulated
Sus_scrofa___CAPRIN2	-1.48643	5.31386	21.3437	9.43949e-05	0.00645914	3	4	Down-regulated
Sus_scrofa___NEDD4	-1.19016	7.39873	21.1191	0.000100088	0.00667536	3	4	Down-regulated
Sus_scrofa___IFT46	-1.50556	5.16582	21.0192	0.000103775	0.00686141	3	4	Down-regulated
Sus_scrofa___FAM200A	-2.05633	4.37954	20.8915	0.000108183	0.00708743	3	4	Down-regulated
Sus_scrofa___RHPN2	-2.6646	4.57738	20.9069	0.000108429	0.00708743	3	4	Down-regulated
Sus_scrofa___ADAMTS19	-2.65532	7.34814	20.7987	0.000109752	0.00715354	3	4	Down-regulated
Sus_scrofa___BTNL9	-4.75071	2.5014	18.3731	0.000111463	0.00722397	3	4	Down-regulated
Sus_scrofa___LAYN	-2.95928	2.6693	19.7155	0.000115698	0.00738161	3	4	Down-regulated
Sus_scrofa___TP53BP1	-1.02365	6.79961	20.6123	0.000115825	0.00738161	3	4	Down-regulated
Sus_scrofa___ENSSSCG00000011121	-1.30559	10.4637	20.5657	0.000117331	0.0074158	3	4	Down-regulated
Sus_scrofa___ZNF831	-4.17897	3.60606	19.982	0.000119846	0.00755395	3	4	Down-regulated
Sus_scrofa___MORC1	-2.41065	4.45229	20.5093	0.000121278	0.00760242	3	4	Down-regulated
Sus_scrofa___REPS2	-1.38017	6.1947	20.3832	0.000123916	0.00774661	3	4	Down-regulated
Sus_scrofa___RGS1	-4.09908	2.29297	19.8044	0.000126351	0.00783476	3	4	Down-regulated
Sus_scrofa___FRMD4A	-1.08584	9.05631	20.2472	0.000128713	0.00795975	3	4	Down-regulated
Sus_scrofa___ZFAND5	-2.64007	6.35882	20.1984	0.000131334	0.00804298	3	4	Down-regulated
Sus_scrofa___GK5	-1.39809	7.62607	20.1663	0.000131812	0.00804298	3	4	Down-regulated
Sus_scrofa___ENSSSCG00000013100	-4.32679	2.70482	17.8947	0.000140145	0.00848378	3	4	Down-regulated
Sus_scrofa___VSIG4	-5.02247	2.15174	19.1218	0.000141235	0.00850485	3	4	Down-regulated
Sus_scrofa___DCN	-1.7223	9.49684	19.9015	0.000142424	0.00855404	3	4	Down-regulated
Sus_scrofa___BRD3	-1.33388	6.33171	19.8041	0.000146739	0.00876728	3	4	Down-regulated
Sus_scrofa___EHD3	-3.72942	2.90113	18.3624	0.000147357	0.00877983	3	4	Down-regulated
Sus_scrofa___DOCK2	-2.40616	3.46636	18.1112	0.0001509	0.00886267	3	4	Down-regulated
Sus_scrofa___OSBPL9	-0.995129	8.07281	19.7055	0.000150908	0.00886267	3	4	Down-regulated
Sus_scrofa___GALNT1	-0.955715	8.16493	19.6961	0.000151328	0.00886267	3	4	Down-regulated
Sus_scrofa___ENSSSCG00000044640	-5.36445	2.42957	17.8868	0.000158515	0.00912511	3	4	Down-regulated
Sus_scrofa___ULK2	-0.954891	8.29989	19.522	0.000159329	0.00913873	3	4	Down-regulated
Sus_scrofa___ABI2	-1.19241	7.30383	19.4822	0.000161254	0.00918025	3	4	Down-regulated
Sus_scrofa___C1QB	-4.8164	1.9357	18.9335	0.000162139	0.00918505	3	4	Down-regulated
Sus_scrofa___PRPSAP1	-1.54705	5.03829	19.4191	0.000165692	0.00930641	3	4	Down-regulated
Sus_scrofa___PLSCR5	-3.24645	2.00436	17.0908	0.000166005	0.00930641	3	4	Down-regulated
Sus_scrofa___ENSSSCG00000006156	-1.38682	5.83079	19.3825	0.000166552	0.00930641	3	4	Down-regulated
Sus_scrofa___DCHS2	-2.14574	4.26968	19.3821	0.000166715	0.00930641	3	4	Down-regulated
Sus_scrofa___MORC4	-1.08099	7.11449	19.3405	0.000168216	0.00936741	3	4	Down-regulated
Sus_scrofa___BMP5	-3.10007	4.16909	18.3786	0.000170326	0.00946194	3	4	Down-regulated
Sus_scrofa___COL21A1	-2.70611	7.70216	19.2123	0.000174768	0.00966195	3	4	Down-regulated
Sus_scrofa___ENSSSCG00000027790	-2.31411	4.85792	19.2313	0.000175557	0.00968223	3	4	Down-regulated
Sus_scrofa___DPP8	-0.924859	7.4346	19.1464	0.000178234	0.00975951	3	4	Down-regulated
Sus_scrofa___TMPO	-2.03922	4.39997	19.1256	0.000182477	0.00994436	3	4	Down-regulated
Sus_scrofa___ENSSSCG00000037775	-3.80558	2.13939	17.2094	0.000186718	0.0100928	3	4	Down-regulated
Sus_scrofa___EPS15	-0.906761	8.50335	18.9657	0.000188138	0.0101325	3	4	Down-regulated
Sus_scrofa___ENPP6	-3.28803	3.37544	18.607	0.000192537	0.010321	3	4	Down-regulated
Sus_scrofa___CEP290	-1.25307	6.48853	18.8746	0.000193541	0.0103265	3	4	Down-regulated
Sus_scrofa___MSS51	-1.49076	4.79665	18.8313	0.000198155	0.0105482	3	4	Down-regulated
Sus_scrofa___THNSL2	-1.50344	5.48113	18.7356	0.0002025	0.0107078	3	4	Down-regulated
Sus_scrofa___GRID1	-1.86621	6.43347	18.7265	0.00020268	0.0107078	3	4	Down-regulated
Sus_scrofa___ENSSSCG00000040719	-2.34646	3.34998	18.0804	0.000204459	0.0107199	3	4	Down-regulated
Sus_scrofa___BAZ2B	-1.03492	9.26473	18.6868	0.000204652	0.0107199	3	4	Down-regulated
Sus_scrofa___PDGFRL	-1.77847	5.83552	18.6267	0.000208973	0.0108542	3	4	Down-regulated
Sus_scrofa___CEP131	-3.15822	2.51201	17.4964	0.000220908	0.0113447	3	4	Down-regulated
Sus_scrofa___CLDN4	-7.41653	2.06218	16.8161	0.000222314	0.0113447	3	4	Down-regulated
Sus_scrofa___CEP43	-1.26777	5.17666	18.4355	0.000222509	0.0113447	3	4	Down-regulated
Sus_scrofa___ASTN1	-3.29753	2.76674	17.4022	0.000222513	0.0113447	3	4	Down-regulated
Sus_scrofa___CDO1	-2.5342	4.25712	18.4101	0.00022348	0.0113687	3	4	Down-regulated
Sus_scrofa___LUC7L3	-0.881725	8.81051	18.358	0.000226183	0.0114554	3	4	Down-regulated
Sus_scrofa___ENSSSCG00000010878	-1.42421	6.1328	18.3471	0.000227282	0.0114858	3	4	Down-regulated
Sus_scrofa___LRRC36	-2.91935	2.62166	17.1733	0.000228522	0.0115132	3	4	Down-regulated
Sus_scrofa___LCP1	-3.35729	3.11863	17.6784	0.000229268	0.0115132	3	4	Down-regulated
Sus_scrofa___CAPN5	-2.33251	4.05417	18.2833	0.000233036	0.0116616	3	4	Down-regulated
Sus_scrofa___FRMD3	-2.12105	8.4896	18.2568	0.000233303	0.0116616	3	4	Down-regulated
Sus_scrofa___CREBBP	-0.880771	8.72636	18.231	0.000235138	0.011677	3	4	Down-regulated
Sus_scrofa___ARHGAP6	-1.47055	8.20669	18.22	0.000235941	0.0116915	3	4	Down-regulated
Sus_scrofa___IFT140	-1.2595	5.84902	18.2089	0.000237271	0.0117069	3	4	Down-regulated
Sus_scrofa___OSTF1	-1.09916	6.99623	18.1633	0.000240151	0.0117982	3	4	Down-regulated
Sus_scrofa___EZH1	-1.47021	6.5865	18.0874	0.000245946	0.0119149	3	4	Down-regulated
Sus_scrofa___PROM1	-2.63658	4.33527	18.0007	0.000256223	0.0122982	3	4	Down-regulated
Sus_scrofa___LIPC	-1.92999	5.66004	17.9499	0.000257376	0.0123277	3	4	Down-regulated
Sus_scrofa___ULK4	-1.18546	6.84637	17.9313	0.00025796	0.01233	3	4	Down-regulated
Sus_scrofa___HMGCLL1	-2.88805	3.16898	17.0414	0.000265729	0.0126224	3	4	Down-regulated
Sus_scrofa___CCP110	-1.54743	5.14091	17.8281	0.000268194	0.0127132	3	4	Down-regulated
Sus_scrofa___EMILIN2	-3.25718	4.09813	17.7538	0.000270378	0.0127903	3	4	Down-regulated
Sus_scrofa___GALR1	-2.76385	3.31215	16.4279	0.000282449	0.0130914	3	4	Down-regulated
Sus_scrofa___LRRK1	-0.863088	8.25598	17.5749	0.000287977	0.0132211	3	4	Down-regulated
Sus_scrofa___MME	-3.40568	6.94898	17.4514	0.00030009	0.0135798	3	4	Down-regulated
Sus_scrofa___PCDH9	-1.80849	7.6411	17.3761	0.000306455	0.013771	3	4	Down-regulated
Sus_scrofa___ENSSSCG00000015747	-4.73216	4.74175	16.9375	0.000307319	0.013771	3	4	Down-regulated
Sus_scrofa___PIK3CG	-3.36218	1.95505	15.6279	0.000325602	0.0142835	3	4	Down-regulated
Sus_scrofa___ENSSSCG00000033909	-3.8243	2.35469	15.5724	0.000326415	0.0142919	3	4	Down-regulated
Sus_scrofa___NUDT22	-2.66367	2.84644	16.764	0.000327539	0.0143138	3	4	Down-regulated
Sus_scrofa___CAMKK2	-1.75094	5.88747	17.0856	0.000336879	0.014684	3	4	Down-regulated
Sus_scrofa___WDFY3	-0.751738	9.26815	17.0561	0.000338826	0.014684	3	4	Down-regulated
Sus_scrofa___KLHL7	-1.45675	5.93238	17.0583	0.00033921	0.014684	3	4	Down-regulated
Sus_scrofa___ARGLU1	-1.07163	8.52126	16.9237	0.000353322	0.0151492	3	4	Down-regulated
Sus_scrofa___MRGPRF	-3.71411	2.27517	15.8229	0.00035357	0.0151492	3	4	Down-regulated
Sus_scrofa___MROH9	-2.47246	3.76864	16.8906	0.00035392	0.0151492	3	4	Down-regulated
Sus_scrofa___ENSSSCG00000035989	-3.60711	1.96396	15.3882	0.000357315	0.0152377	3	4	Down-regulated
Sus_scrofa___CILK1	-1.14355	6.48413	16.8679	0.000359894	0.0152909	3	4	Down-regulated
Sus_scrofa___ACSF2	-1.17121	6.5416	16.842	0.000362813	0.015358	3	4	Down-regulated
Sus_scrofa___APBB1IP	-1.98712	3.59923	16.5713	0.000375127	0.0157054	3	4	Down-regulated
Sus_scrofa___CCDC150	-1.17333	5.58514	16.6942	0.000381045	0.0158951	3	4	Down-regulated
Sus_scrofa___FBLN5	-2.68518	7.82915	16.677	0.000382188	0.0159139	3	4	Down-regulated
Sus_scrofa___HMCN2	-3.94585	8.62959	16.5899	0.000393004	0.016188	3	4	Down-regulated
Sus_scrofa___ENSSSCG00000045443	-2.83885	1.59612	14.6522	0.000399788	0.0164379	3	4	Down-regulated
Sus_scrofa___RBM47	-1.89067	4.25082	16.5032	0.000409302	0.0167391	3	4	Down-regulated
Sus_scrofa___SNRNP48	-1.01975	6.19075	16.4523	0.000411007	0.0167789	3	4	Down-regulated
Sus_scrofa___ARHGEF11	-0.845597	8.26346	16.4044	0.000416966	0.0169018	3	4	Down-regulated
Sus_scrofa___ARHGAP4	-6.27991	1.26611	15.1914	0.000421507	0.0170061	3	4	Down-regulated
Sus_scrofa___SESN3	-1.74936	6.70239	16.3631	0.000422955	0.0170061	3	4	Down-regulated
Sus_scrofa___ASB9	-1.63283	4.79663	16.3534	0.000428432	0.0171845	3	4	Down-regulated
Sus_scrofa___IFT57	-0.988085	6.3008	16.2843	0.000433751	0.017277	3	4	Down-regulated
Sus_scrofa___ACE	-2.1459	2.58363	15.6877	0.000438438	0.0173709	3	4	Down-regulated
Sus_scrofa___LMX1A	-2.26012	6.27471	16.2375	0.000440727	0.0173709	3	4	Down-regulated
Sus_scrofa___RB1CC1	-1.06065	7.59009	16.2064	0.000444449	0.0174307	3	4	Down-regulated
Sus_scrofa___VEGFD	-2.43576	6.98261	16.2011	0.000445439	0.0174398	3	4	Down-regulated
Sus_scrofa___IL10RA	-3.70437	3.05994	15.0556	0.000447806	0.0174728	3	4	Down-regulated
Sus_scrofa___GP91-PHOX	-6.87657	1.76547	15.5794	0.00045923	0.0177975	3	4	Down-regulated
Sus_scrofa___SASH1	-1.28693	9.78927	16.0929	0.000460996	0.0178358	3	4	Down-regulated
Sus_scrofa___PNPO	-1.47441	5.39287	16.0764	0.00046566	0.0179409	3	4	Down-regulated
Sus_scrofa___ITGB2	-6.13902	1.27751	15.1453	0.000471249	0.0180801	3	4	Down-regulated
Sus_scrofa___ATOH8	-2.49918	4.10003	16.0535	0.000472523	0.0180987	3	4	Down-regulated
Sus_scrofa___DENND2C	-0.932169	6.30922	16.0054	0.000474642	0.0181495	3	4	Down-regulated
Sus_scrofa___SLC25A45	-2.66081	1.8958	14.2702	0.000479612	0.0182181	3	4	Down-regulated
Sus_scrofa___KCNS3	-3.43551	2.9598	15.2999	0.000482469	0.0182736	3	4	Down-regulated
Sus_scrofa___ANTXR2	-1.47611	8.75827	15.9104	0.000489145	0.018458	3	4	Down-regulated
Sus_scrofa___TSHZ1	-1.19372	5.95445	15.8597	0.000498207	0.0185896	3	4	Down-regulated
Sus_scrofa___ROBO2	-2.2901	8.59518	15.8502	0.000498835	0.0185896	3	4	Down-regulated
Sus_scrofa___CARD11	-4.08288	2.19069	14.6909	0.000499114	0.0185896	3	4	Down-regulated
Sus_scrofa___AMOT	-1.64369	5.59804	15.8356	0.000502798	0.0186964	3	4	Down-regulated
Sus_scrofa___MCOLN2	-2.64376	4.72161	15.8519	0.0005063	0.0187658	3	4	Down-regulated
Sus_scrofa___USP22	-1.13175	5.30519	15.7928	0.000510438	0.0188887	3	4	Down-regulated
Sus_scrofa___HSPB6	-4.19519	2.27375	14.7618	0.000514254	0.0189992	3	4	Down-regulated
Sus_scrofa___CCDC82	-1.62031	5.7328	15.75	0.000516628	0.0190463	3	4	Down-regulated
Sus_scrofa___ZNF569	-1.08915	5.88664	15.6712	0.000529673	0.0193508	3	4	Down-regulated
Sus_scrofa___SETD3	-0.928836	7.44797	15.647	0.000533142	0.0194466	3	4	Down-regulated
Sus_scrofa___ENSSSCG00000035736	-6.59458	1.29183	16.2146	0.000554093	0.0198361	3	4	Down-regulated
Sus_scrofa___ENSSSCG00000002260	-1.61192	8.00399	15.5243	0.000555083	0.0198361	3	4	Down-regulated
Sus_scrofa___BTK	-3.20258	1.61479	13.97	0.000555927	0.0198361	3	4	Down-regulated
Sus_scrofa___ENSSSCG00000010884	-2.25794	3.29784	15.4094	0.000559497	0.0199325	3	4	Down-regulated
Sus_scrofa___SOBP	-1.40495	9.21587	15.4646	0.000565989	0.020105	3	4	Down-regulated
Sus_scrofa___ENSSSCG00000028741	-2.28572	3.78769	15.383	0.000572892	0.0202614	3	4	Down-regulated
Sus_scrofa___CACHD1	-1.09798	6.60867	15.4253	0.000573645	0.0202614	3	4	Down-regulated
Sus_scrofa___RIN2	-1.35021	8.55863	15.4017	0.000577861	0.0203341	3	4	Down-regulated
Sus_scrofa___MTRR	-0.948471	6.1955	15.3956	0.000579567	0.0203629	3	4	Down-regulated
Sus_scrofa___ENSSSCG00000014097	-1.51782	4.78308	15.4115	0.000581811	0.0204106	3	4	Down-regulated
Sus_scrofa___FIG4	-1.12123	7.21543	15.3506	0.000587782	0.020537	3	4	Down-regulated
Sus_scrofa___ITM2B	-1.27218	6.98964	15.3494	0.000588101	0.020537	3	4	Down-regulated
Sus_scrofa___TMEM35B	-3.522	1.52829	13.997	0.00058961	0.0205584	3	4	Down-regulated
Sus_scrofa___ENSSSCG00000045703	-6.25412	1.69358	14.2717	0.000596503	0.0207135	3	4	Down-regulated
Sus_scrofa___DENND11	-2.1557	3.09442	15.0307	0.000611196	0.0210867	3	4	Down-regulated
Sus_scrofa___CNNM3	-1.37861	4.89818	15.2485	0.000612266	0.0210919	3	4	Down-regulated
Sus_scrofa___SH3TC1	-2.40751	3.07525	15.0818	0.000613282	0.0210953	3	4	Down-regulated
Sus_scrofa___ENO3	-4.59396	2.75841	14.1288	0.000619644	0.0212504	3	4	Down-regulated
Sus_scrofa___DICER1	-0.918305	7.57221	15.1864	0.000620591	0.0212511	3	4	Down-regulated
Sus_scrofa___PTPRG	-0.883218	8.40696	15.1748	0.000622927	0.0212676	3	4	Down-regulated
Sus_scrofa___ARHGAP20	-3.09562	6.02518	15.1757	0.000624789	0.0212995	3	4	Down-regulated
Sus_scrofa___CDK14	-1.12165	10.4225	15.1313	0.000631964	0.0214133	3	4	Down-regulated
Sus_scrofa___DOCK10	-1.57847	7.3344	15.1279	0.000632796	0.0214133	3	4	Down-regulated
Sus_scrofa___RAVER2	-1.63491	4.45883	15.1343	0.000638996	0.0215279	3	4	Down-regulated
Sus_scrofa___CEP68	-1.31609	5.39795	15.015	0.000659166	0.0219385	3	4	Down-regulated
Sus_scrofa___DEPTOR	-1.29349	6.8894	15.0026	0.000659887	0.0219385	3	4	Down-regulated
Sus_scrofa___ITGB5	-1.37583	7.43294	14.9926	0.00066195	0.0219385	3	4	Down-regulated
Sus_scrofa___MAP1A	-1.60525	5.25959	15.0053	0.000662659	0.0219385	3	4	Down-regulated
Sus_scrofa___ST3GAL5	-2.08674	5.97646	14.9652	0.000669207	0.0220598	3	4	Down-regulated
Sus_scrofa___NAALADL2	-1.1958	9.97566	14.9245	0.000677053	0.0222226	3	4	Down-regulated
Sus_scrofa___OSCP1	-1.36361	4.66522	14.9443	0.000679023	0.0222237	3	4	Down-regulated
Sus_scrofa___TC2N	-2.56181	3.0419	14.5158	0.000686227	0.0223846	3	4	Down-regulated
Sus_scrofa___ANKRD13A	-1.13094	6.40804	14.8315	0.000698945	0.0226496	3	4	Down-regulated
Sus_scrofa___SORCS1	-2.50763	3.37824	14.5477	0.000706511	0.0228302	3	4	Down-regulated
Sus_scrofa___ENSSSCG00000016119	-1.48727	8.60301	14.7605	0.000715322	0.02305	3	4	Down-regulated
Sus_scrofa___RND3	-2.31288	5.86886	14.6948	0.000733163	0.0234275	3	4	Down-regulated
Sus_scrofa___KIF3B	-1.58455	5.76972	14.6442	0.000745458	0.0237079	3	4	Down-regulated
Sus_scrofa___KIAA1109	-0.905302	7.3518	14.6358	0.000746071	0.0237079	3	4	Down-regulated
Sus_scrofa___CYP39A1	-1.43452	6.14639	14.6171	0.000751437	0.0237744	3	4	Down-regulated
Sus_scrofa___NLRP3	-3.61741	2.15014	13.3491	0.000751474	0.0237744	3	4	Down-regulated
Sus_scrofa___CYTH2	-1.15741	5.95698	14.5994	0.000756116	0.0238414	3	4	Down-regulated
Sus_scrofa___CATSPERB	-3.77258	2.05902	13.4587	0.000758015	0.0238561	3	4	Down-regulated
Sus_scrofa___F13A1	-8.17874	3.96166	13.9997	0.000769665	0.0240906	3	4	Down-regulated
Sus_scrofa___C1QA	-6.19555	1.38622	14.8941	0.000780511	0.0243202	3	4	Down-regulated
Sus_scrofa___ADAMTS16	-3.06178	3.57954	14.2818	0.000785281	0.0243855	3	4	Down-regulated
Sus_scrofa___CCDC170	-1.02873	7.08296	14.4796	0.000786525	0.0243855	3	4	Down-regulated
Sus_scrofa___PACS2	-1.26729	5.23273	14.4537	0.00079685	0.0246058	3	4	Down-regulated
Sus_scrofa___COLGALT2	-2.43251	6.22863	14.4327	0.000800485	0.024659	3	4	Down-regulated
Sus_scrofa___DTX4	-1.92686	5.54731	14.4037	0.000810145	0.0248108	3	4	Down-regulated
Sus_scrofa___PDCD7	-1.36966	4.51391	14.3404	0.000832841	0.025227	3	4	Down-regulated
Sus_scrofa___CDH7	-2.5553	3.15027	13.9114	0.00085216	0.025557	3	4	Down-regulated
Sus_scrofa___CLK1	-1.01584	7.95957	14.2227	0.00085813	0.0256025	3	4	Down-regulated
Sus_scrofa___SNX24	-1.45011	7.07989	14.2157	0.000860372	0.0256025	3	4	Down-regulated
Sus_scrofa___SELENOP	-2.45317	6.45962	14.2135	0.000861765	0.0256107	3	4	Down-regulated
Sus_scrofa___SMARCA1	-1.1233	6.49049	14.1884	0.000868657	0.0257822	3	4	Down-regulated
Sus_scrofa___ENSSSCG00000033570	-1.77206	3.72513	14.1953	0.000870976	0.025789	3	4	Down-regulated
Sus_scrofa___EHBP1	-1.10862	9.13121	14.1747	0.00087226	0.025789	3	4	Down-regulated
Sus_scrofa___SLC9C2	-2.52356	2.7136	13.8363	0.00087707	0.0258646	3	4	Down-regulated
Sus_scrofa___MEIOB	-1.10787	7.44529	14.1552	0.00087822	0.0258652	3	4	Down-regulated
Sus_scrofa___GULP1	-1.4523	8.57019	14.1415	0.000882237	0.0258838	3	4	Down-regulated
Sus_scrofa___SYNE2	-1.03906	7.8521	14.1048	0.000893422	0.0261326	3	4	Down-regulated
Sus_scrofa___ENSSSCG00000007512	-1.20724	5.42422	14.1109	0.000894133	0.0261326	3	4	Down-regulated
Sus_scrofa___ENSSSCG00000009327	-0.929174	7.4125	14.0618	0.000906713	0.0263334	3	4	Down-regulated
Sus_scrofa___CORO1A	-5.97438	1.05245	14.4161	0.000908614	0.0263334	3	4	Down-regulated
Sus_scrofa___OGA	-0.884967	7.76791	14.0532	0.000909327	0.0263334	3	4	Down-regulated
Sus_scrofa___PDK4	-2.94105	6.14766	14.0415	0.00091338	0.0263382	3	4	Down-regulated
Sus_scrofa___U2SURP	-0.894404	8.03109	13.9969	0.000927032	0.0264995	3	4	Down-regulated
Sus_scrofa___SCD5	-1.37714	5.0256	14.0117	0.00092754	0.0264995	3	4	Down-regulated
Sus_scrofa___BMPER	-0.998766	7.13808	13.9871	0.000930356	0.0264995	3	4	Down-regulated
Sus_scrofa___TLL2	-2.74777	3.26099	13.6306	0.000930617	0.0264995	3	4	Down-regulated
Sus_scrofa___ARHGAP10	-1.31019	10.1515	13.968	0.000936239	0.0265391	3	4	Down-regulated
Sus_scrofa___MAP2K6	-2.96002	4.85775	13.9355	0.00095451	0.0267318	3	4	Down-regulated
Sus_scrofa___NDUFA1	-3.84123	2.71764	13.108	0.000968672	0.0268803	3	4	Down-regulated
Sus_scrofa___ENSSSCG00000048263	-0.972205	8.59004	13.8321	0.00098108	0.0269891	3	4	Down-regulated
Sus_scrofa___PSD3	-1.19826	9.40771	13.8169	0.00098623	0.0270983	3	4	Down-regulated
Sus_scrofa___USP40	-0.689409	7.8978	13.7949	0.000993789	0.0272733	3	4	Down-regulated
Sus_scrofa___OCLN	-2.73107	2.0018	12.8692	0.00100923	0.027631	3	4	Down-regulated
Sus_scrofa___C11orf53	-3.02187	1.78574	12.4263	0.00101589	0.0277801	3	4	Down-regulated
Sus_scrofa___RAB30	-1.84939	6.75514	13.7125	0.00102288	0.027938	3	4	Down-regulated
Sus_scrofa___DENND6A	-0.941763	7.20394	13.7048	0.00102537	0.0279727	3	4	Down-regulated
Sus_scrofa___ARRB2	-1.93761	2.59849	13.0248	0.0010448	0.0283343	3	4	Down-regulated
Sus_scrofa___GTF3A	-1.09283	5.09013	13.6629	0.00104516	0.0283343	3	4	Down-regulated
Sus_scrofa___ANGEL2	-1.00989	6.7083	13.6184	0.00105673	0.028456	3	4	Down-regulated
Sus_scrofa___ATP9A	-0.808857	6.92063	13.6052	0.00106148	0.0285372	3	4	Down-regulated
Sus_scrofa___ADGRD1	-1.04116	10.3693	13.6015	0.00106255	0.0285372	3	4	Down-regulated
Sus_scrofa___GPR176	-1.57881	6.44988	13.6007	0.00106348	0.0285372	3	4	Down-regulated
Sus_scrofa___TSEN2	-1.94654	7.82138	13.5893	0.00106721	0.0285763	3	4	Down-regulated
Sus_scrofa___ZFP69B	-1.37576	5.13433	13.6002	0.00106742	0.0285763	3	4	Down-regulated
Sus_scrofa___TSPAN11	-2.06302	4.32796	13.5812	0.00107875	0.0287789	3	4	Down-regulated
Sus_scrofa___EIF4E3	-0.84667	6.62507	13.5345	0.00108802	0.0289588	3	4	Down-regulated
Sus_scrofa___TCF4	-0.99448	11.0365	13.5264	0.00109064	0.0289742	3	4	Down-regulated
Sus_scrofa___KIN	-0.886316	6.82101	13.526	0.00109112	0.0289742	3	4	Down-regulated
Sus_scrofa___BLNK	-2.45554	3.3569	13.2838	0.00110898	0.0293464	3	4	Down-regulated
Sus_scrofa___PCED1A	-1.6475	3.99458	13.504	0.00111289	0.0293822	3	4	Down-regulated
Sus_scrofa___FAIM2	-2.3988	2.97261	13.1314	0.00111895	0.029508	3	4	Down-regulated
Sus_scrofa___LIMS2	-3.3301	5.07727	13.433	0.00112339	0.0295127	3	4	Down-regulated
Sus_scrofa___FBP1	-2.48385	4.99892	13.4256	0.00113592	0.029649	3	4	Down-regulated
Sus_scrofa___FAXDC2	-6.08374	1.54455	12.4816	0.00114127	0.0297549	3	4	Down-regulated
Sus_scrofa___RFX2	-1.55398	7.59807	13.3879	0.0011448	0.0298129	3	4	Down-regulated
Sus_scrofa___ENPP2	-2.2878	5.81076	13.3534	0.00116154	0.0301121	3	4	Down-regulated
Sus_scrofa___SKAP1	-1.74322	3.7551	13.2604	0.00116865	0.0301809	3	4	Down-regulated
Sus_scrofa___SH3D19	-0.859113	9.54462	13.3206	0.00117185	0.0301825	3	4	Down-regulated
Sus_scrofa___TOM1L1	-1.66345	4.93731	13.3316	0.00117392	0.0301825	3	4	Down-regulated
Sus_scrofa___UBE3C	-1.10686	5.82112	13.3178	0.00117478	0.0301825	3	4	Down-regulated
Sus_scrofa___MARCHF1	-2.89556	3.87187	13.1095	0.00117612	0.0301831	3	4	Down-regulated
Sus_scrofa___NCOA1	-1.23172	8.2856	13.3039	0.00117881	0.0302184	3	4	Down-regulated
Sus_scrofa___TBCCD1	-0.921033	5.13399	13.2877	0.0011902	0.0304085	3	4	Down-regulated
Sus_scrofa___SMAD1	-0.998304	7.83548	13.2599	0.00119713	0.0305444	3	4	Down-regulated
Sus_scrofa___PURG	-1.25923	6.62055	13.2366	0.00120745	0.0307123	3	4	Down-regulated
Sus_scrofa___SP3	-0.800306	7.43592	13.1986	0.00122326	0.0309992	3	4	Down-regulated
Sus_scrofa___NCOA2	-0.87003	9.08978	13.193	0.00122553	0.0310005	3	4	Down-regulated
Sus_scrofa___ENSSSCG00000013788	-2.51169	2.12855	12.2074	0.0012375	0.0311656	3	4	Down-regulated
Sus_scrofa___MAPRE2	-1.14518	6.46708	13.1572	0.00124191	0.0312083	3	4	Down-regulated
Sus_scrofa___IGF2R	-0.910311	7.13681	13.1073	0.00126326	0.031572	3	4	Down-regulated
Sus_scrofa___CCDC122	-0.86394	6.05542	13.0865	0.00127343	0.0317224	3	4	Down-regulated
Sus_scrofa___FRMD6	-1.29043	8.09034	13.0569	0.00128574	0.0319537	3	4	Down-regulated
Sus_scrofa___ESR1	-1.70612	4.14111	13.0717	0.00129321	0.0320413	3	4	Down-regulated
Sus_scrofa___BEX3	-1.95787	3.23638	12.9999	0.00129702	0.0320737	3	4	Down-regulated
Sus_scrofa___ENSSSCG00000004081	-1.26436	6.51752	13.0195	0.0013043	0.0322116	3	4	Down-regulated
Sus_scrofa___PRDM6	-1.60213	6.09517	13.0007	0.00131405	0.0323937	3	4	Down-regulated
Sus_scrofa___CYHR1	-1.42467	4.74878	13.014	0.0013145	0.0323937	3	4	Down-regulated
Sus_scrofa___KYAT3	-0.959571	6.72413	12.97	0.0013262	0.0325928	3	4	Down-regulated
Sus_scrofa___SLC27A6	-2.77998	6.98728	12.9668	0.00132787	0.0325928	3	4	Down-regulated
Sus_scrofa___VPS36	-0.801466	7.53005	12.9359	0.00134196	0.0327539	3	4	Down-regulated
Sus_scrofa___CALCRL	-1.39358	7.66079	12.9058	0.00135635	0.032895	3	4	Down-regulated
Sus_scrofa___MTHFR	-1.41621	4.48404	12.9253	0.00135809	0.0329024	3	4	Down-regulated
Sus_scrofa___CKM	-3.90555	4.3495	12.257	0.00137088	0.0331196	3	4	Down-regulated
Sus_scrofa___RGS12	-0.985416	6.38367	12.8762	0.00137138	0.0331196	3	4	Down-regulated
Sus_scrofa___DOCK8	-1.87306	3.69257	12.7452	0.00137347	0.0331274	3	4	Down-regulated
Sus_scrofa___TNRC18	-0.896593	6.61628	12.869	0.00137459	0.0331274	3	4	Down-regulated
Sus_scrofa___ENSSSCG00000040956	-1.18466	6.2464	12.8237	0.00139797	0.03362	3	4	Down-regulated
Sus_scrofa___DEUP1	-1.6494	6.05837	12.8082	0.00140543	0.0337643	3	4	Down-regulated
Sus_scrofa___MN1	-1.25228	5.85359	12.7739	0.00142359	0.0340755	3	4	Down-regulated
Sus_scrofa___RPIA	-1.41311	4.55598	12.7902	0.00142454	0.0340755	3	4	Down-regulated
Sus_scrofa___SNX2	-0.893608	6.60226	12.7389	0.00143964	0.0343052	3	4	Down-regulated
Sus_scrofa___CD53	-4.21742	1.94749	12.0338	0.00143991	0.0343052	3	4	Down-regulated
Sus_scrofa___EBF3	-1.30896	8.49049	12.7258	0.00144589	0.0344119	3	4	Down-regulated
Sus_scrofa___PKD2	-0.831687	7.73332	12.6634	0.0014785	0.0349704	3	4	Down-regulated
Sus_scrofa___ANKRD55	-1.55806	4.09879	12.6531	0.00149933	0.035381	3	4	Down-regulated
Sus_scrofa___SCAI	-1.11237	6.45393	12.6217	0.00150133	0.035381	3	4	Down-regulated
Sus_scrofa___LTBP4	-1.19164	6.41661	12.6184	0.00150321	0.035381	3	4	Down-regulated
Sus_scrofa___PPP6R3	-0.725652	8.38836	12.6162	0.00150357	0.035381	3	4	Down-regulated
Sus_scrofa___CPNE1	-0.868548	7.2236	12.6103	0.00150695	0.0353971	3	4	Down-regulated
Sus_scrofa___MMP23B	-1.05916	6.86362	12.6067	0.00150906	0.0354012	3	4	Down-regulated
Sus_scrofa___EVC	-1.02643	6.06719	12.6018	0.0015127	0.0354504	3	4	Down-regulated
Sus_scrofa___RALBP1	-0.865448	6.30461	12.5782	0.00152506	0.0355733	3	4	Down-regulated
Sus_scrofa___STIM2	-0.960547	6.74528	12.5752	0.00152623	0.0355733	3	4	Down-regulated
Sus_scrofa___DNAI3	-2.28727	2.8648	11.8931	0.00152725	0.0355733	3	4	Down-regulated
Sus_scrofa___RFX3	-0.872074	7.3481	12.524	0.00155417	0.0360903	3	4	Down-regulated
Sus_scrofa___KYNU	-2.44245	3.31298	12.3145	0.0015625	0.036174	3	4	Down-regulated
Sus_scrofa___ENSSSCG00000022724	-2.43475	2.58838	12.1622	0.00156869	0.0362077	3	4	Down-regulated
Sus_scrofa___ENSSSCG00000039339	-2.99439	2.78295	12.1639	0.00157356	0.0362108	3	4	Down-regulated
Sus_scrofa___SH3GLB2	-2.36758	3.09429	12.3322	0.00161239	0.036766	3	4	Down-regulated
Sus_scrofa___FOXN3	-0.804747	9.26977	12.4105	0.00161867	0.036766	3	4	Down-regulated
Sus_scrofa___FNDC3B	-0.932164	11.0896	12.4049	0.00162189	0.036766	3	4	Down-regulated
Sus_scrofa___SYK	-2.8311	2.8638	11.8527	0.00162204	0.036766	3	4	Down-regulated
Sus_scrofa___ENSSSCG00000022236	-2.90719	1.9881	11.4987	0.00162379	0.036766	3	4	Down-regulated
Sus_scrofa___LAPTM5	-2.89499	1.96832	11.5114	0.00162435	0.036766	3	4	Down-regulated
Sus_scrofa___AGTR1	-1.92141	5.88284	12.393	0.00163154	0.036766	3	4	Down-regulated
Sus_scrofa___ACTC1	-3.23552	3.21754	12.1561	0.00163202	0.036766	3	4	Down-regulated
Sus_scrofa___TLE4	-1.25937	6.65537	12.3872	0.00163294	0.036766	3	4	Down-regulated
Sus_scrofa___IFN-DELTA-1	-2.98539	2.47532	11.7305	0.00165491	0.0370426	3	4	Down-regulated
Sus_scrofa___ADD1	-0.738911	7.94782	12.3252	0.00166927	0.037255	3	4	Down-regulated
Sus_scrofa___FAM110B	-1.24234	6.68696	12.3205	0.00167257	0.0372924	3	4	Down-regulated
Sus_scrofa___RAP1GAP2	-2.97609	2.75355	11.4938	0.00170102	0.0378057	3	4	Down-regulated
Sus_scrofa___ATRNL1	-1.10721	10.1832	12.2709	0.00170219	0.0378057	3	4	Down-regulated
Sus_scrofa___NME7	-1.38984	6.2538	12.2339	0.00172642	0.0381413	3	4	Down-regulated
Sus_scrofa___CEP162	-1.02431	7.05101	12.2087	0.00174132	0.0383409	3	4	Down-regulated
Sus_scrofa___MPND	-2.41536	2.91786	11.9898	0.00175146	0.0384891	3	4	Down-regulated
Sus_scrofa___TNNT2	-4.06041	5.64487	12.2008	0.00175309	0.0384891	3	4	Down-regulated
Sus_scrofa___C4BPA	-5.73912	1.16793	11.7288	0.00175497	0.0384936	3	4	Down-regulated
Sus_scrofa___SPATA6	-1.21508	6.16321	12.1441	0.00178355	0.0389714	3	4	Down-regulated
Sus_scrofa___MFAP5	-1.51814	8.58973	12.1283	0.00179251	0.0390556	3	4	Down-regulated
Sus_scrofa___MAP3K4	-1.27138	6.42349	12.0806	0.00182479	0.0396085	3	4	Down-regulated
Sus_scrofa___HERC1	-0.810992	7.59766	12.0715	0.00182997	0.0396833	3	4	Down-regulated
Sus_scrofa___USP12	-0.748093	6.67421	12.063	0.00183608	0.0397043	3	4	Down-regulated
Sus_scrofa___DIP2A	-1.10337	6.70096	12.0609	0.00183746	0.0397043	3	4	Down-regulated
Sus_scrofa___SIPA1	-1.74525	3.33064	12.0317	0.00184203	0.039757	3	4	Down-regulated
Sus_scrofa___AKAP12	-1.25198	7.95283	12.0208	0.00186403	0.0400434	3	4	Down-regulated
Sus_scrofa___TMEM71	-3.38461	1.51297	11.2328	0.00186968	0.0401057	3	4	Down-regulated
Sus_scrofa___FMO1	-3.08253	7.99159	11.9879	0.00188665	0.040303	3	4	Down-regulated
Sus_scrofa___SSPN	-2.32523	6.19303	11.9838	0.00189117	0.0403619	3	4	Down-regulated
Sus_scrofa___GOLIM4	-1.1199	6.71298	11.9657	0.00190235	0.0405252	3	4	Down-regulated
Sus_scrofa___NREP	-2.94616	4.67649	11.8812	0.00193931	0.0411685	3	4	Down-regulated
Sus_scrofa___PROKR1	-1.76025	4.03131	11.9352	0.00193973	0.0411685	3	4	Down-regulated
Sus_scrofa___GPS1	-1.2625	4.35662	11.9199	0.0019515	0.0412854	3	4	Down-regulated
Sus_scrofa___MTMR14	-0.906923	6.61803	11.8921	0.00195423	0.0412854	3	4	Down-regulated
Sus_scrofa___RNF217	-0.890824	7.61738	11.8698	0.00196972	0.0415744	3	4	Down-regulated
Sus_scrofa___MIIP	-1.60295	4.08703	11.8586	0.00199747	0.0420826	3	4	Down-regulated
Sus_scrofa___ENSSSCG00000000530	-1.4762	7.04281	11.8029	0.00201911	0.0422283	3	4	Down-regulated
Sus_scrofa___TMEM231	-1.53679	4.11769	11.8053	0.00203745	0.0424957	3	4	Down-regulated
Sus_scrofa___ENSSSCG00000027232	-3.04438	1.71533	10.7439	0.0020414	0.0424968	3	4	Down-regulated
Sus_scrofa___PDZRN3	-1.24559	9.83816	11.7702	0.00204277	0.0424968	3	4	Down-regulated
Sus_scrofa___TRIR	-1.32516	4.42695	11.7906	0.00204492	0.0424968	3	4	Down-regulated
Sus_scrofa___ENSSSCG00000023419	-0.89963	6.15122	11.7633	0.0020494	0.0425129	3	4	Down-regulated
Sus_scrofa___C5orf15	-1.55596	4.28906	11.7749	0.00205412	0.0425724	3	4	Down-regulated
Sus_scrofa___RAPGEF1	-0.843981	7.08576	11.7051	0.00209261	0.0431095	3	4	Down-regulated
Sus_scrofa___ARL5A	-0.883319	5.77713	11.6915	0.00210561	0.0432877	3	4	Down-regulated
Sus_scrofa___CYTH4	-2.67829	1.77872	10.7909	0.00211343	0.0433707	3	4	Down-regulated
Sus_scrofa___MTM1	-0.949226	5.26022	11.6801	0.0021179	0.0433847	3	4	Down-regulated
Sus_scrofa___CRYZ	-1.45969	4.57925	11.6816	0.00212528	0.0434205	3	4	Down-regulated
Sus_scrofa___GALNS	-1.16145	5.18445	11.6709	0.00212532	0.0434205	3	4	Down-regulated
Sus_scrofa___ZNF174	-2.56487	3.06617	11.4987	0.00213273	0.0434248	3	4	Down-regulated
Sus_scrofa___PTH1R	-1.52407	4.67598	11.6663	0.0021361	0.0434248	3	4	Down-regulated
Sus_scrofa___QSOX1	-1.28419	5.22555	11.6581	0.00213833	0.0434248	3	4	Down-regulated
Sus_scrofa___HSPG2	-0.918806	8.84055	11.6446	0.00213937	0.0434248	3	4	Down-regulated
Sus_scrofa___FRMD4B	-1.70384	6.80269	11.6442	0.00214067	0.0434248	3	4	Down-regulated
Sus_scrofa___IKBKG	-1.42339	4.6782	11.6573	0.00214456	0.0434653	3	4	Down-regulated
Sus_scrofa___CLCC1	-1.03302	6.73778	11.6006	0.00217495	0.0438151	3	4	Down-regulated
Sus_scrofa___YPEL3	-1.59754	4.91922	11.6112	0.0021771	0.0438151	3	4	Down-regulated
Sus_scrofa___PRKRA	-1.18899	4.6459	11.6073	0.00218245	0.0438843	3	4	Down-regulated
Sus_scrofa___AKT3	-0.695788	9.59694	11.5776	0.00219293	0.0439876	3	4	Down-regulated
Sus_scrofa___ZER1	-1.01651	5.75504	11.5688	0.00220289	0.0441406	3	4	Down-regulated
Sus_scrofa___ENSSSCG00000008533	-4.69387	7.36153	11.5571	0.00221372	0.0442415	3	4	Down-regulated
Sus_scrofa___TARDBP	-0.856135	6.47605	11.5402	0.00222436	0.0443214	3	4	Down-regulated
Sus_scrofa___RAB11FIP2	-0.92215	6.28435	11.5346	0.0022293	0.0443214	3	4	Down-regulated
Sus_scrofa___PRAM1	-1.23981	4.34332	11.5539	0.00223169	0.0443304	3	4	Down-regulated
Sus_scrofa___SLC9A7	-1.74067	4.10548	11.5447	0.0022431	0.0445186	3	4	Down-regulated
Sus_scrofa___ENSSSCG00000032129	-3.44945	3.54897	11.3956	0.00227345	0.0449204	3	4	Down-regulated
Sus_scrofa___LAIR1	-4.11796	1.43466	11.4045	0.00229927	0.0452419	3	4	Down-regulated
Sus_scrofa___CCBE1	-1.25679	10.5928	11.422	0.00232294	0.0455515	3	4	Down-regulated
Sus_scrofa___SLC22A4	-2.08469	2.81437	11.0791	0.00233404	0.0457239	3	4	Down-regulated
Sus_scrofa___SAMD14	-5.79004	1.33963	10.5992	0.00233572	0.0457239	3	4	Down-regulated
Sus_scrofa___SEMA6C	-2.37867	2.98168	11.2509	0.00234088	0.0457859	3	4	Down-regulated
Sus_scrofa___TNRC6B	-0.80359	9.17052	11.3934	0.00234776	0.0458422	3	4	Down-regulated
Sus_scrofa___GPR1	-1.58634	6.97165	11.3746	0.00236493	0.0460209	3	4	Down-regulated
Sus_scrofa___ARID4A	-0.851267	7.22325	11.3672	0.002371	0.0460327	3	4	Down-regulated
Sus_scrofa___ITSN2	-0.775499	7.7012	11.3483	0.00238763	0.0462533	3	4	Down-regulated
Sus_scrofa___ENSSSCG00000001456	-2.1163	4.28694	11.3651	0.00238897	0.0462533	3	4	Down-regulated
Sus_scrofa___ABHD8	-3.06664	2.05163	10.7508	0.00240517	0.0463713	3	4	Down-regulated
Sus_scrofa___SEPTIN1	-2.84118	2.3177	10.8487	0.0024197	0.0465731	3	4	Down-regulated
Sus_scrofa___PRKCQ	-3.46359	1.85638	10.5322	0.0024334	0.0466803	3	4	Down-regulated
Sus_scrofa___ENSSSCG00000012088	-1.03956	5.65249	11.2806	0.00245228	0.0468629	3	4	Down-regulated
Sus_scrofa___ABI3BP	-2.10845	8.21945	11.2758	0.00245314	0.0468629	3	4	Down-regulated
Sus_scrofa___ITGB6	-3.98172	1.99753	10.3673	0.00245907	0.0469372	3	4	Down-regulated
Sus_scrofa___AKAP8	-0.927863	6.17225	11.2661	0.00246341	0.0469809	3	4	Down-regulated
Sus_scrofa___NT5E	-1.55597	3.67952	11.2607	0.00248894	0.0473909	3	4	Down-regulated
Sus_scrofa___ENSSSCG00000027349	-1.52573	4.90404	11.2498	0.00248904	0.0473909	3	4	Down-regulated
Sus_scrofa___ITGAM	-2.17828	3.29404	11.0091	0.00249472	0.0474597	3	4	Down-regulated
Sus_scrofa___ENSSSCG00000038540	-1.91406	4.1441	11.2249	0.0025016	0.0475423	3	4	Down-regulated
Sus_scrofa___NID1	-1.21679	10.0261	11.2208	0.00250374	0.0475423	3	4	Down-regulated
Sus_scrofa___GNLY	-6.36168	1.0737	14.2891	0.00250942	0.0475423	3	4	Down-regulated
Sus_scrofa___DNAH10	-1.19838	5.16979	11.2141	0.00251758	0.047579	3	4	Down-regulated
Sus_scrofa___GPN3	-1.32804	3.73931	11.2221	0.00252132	0.0476103	3	4	Down-regulated
Sus_scrofa___MAT2B	-1.14704	5.35784	11.2008	0.00252848	0.0476672	3	4	Down-regulated
Sus_scrofa___ENSSSCG00000002259	-1.09403	9.04594	11.171	0.00255085	0.0478529	3	4	Down-regulated
Sus_scrofa___ATP5PF	-2.63086	4.04325	11.1478	0.0025697	0.04807	3	4	Down-regulated
Sus_scrofa___HNRNPH3	-0.822731	7.33097	11.1384	0.00258239	0.0482081	3	4	Down-regulated
Sus_scrofa___ZNF879	-0.990533	5.13593	11.1433	0.00258597	0.0482357	3	4	Down-regulated
Sus_scrofa___PCDHAC2	-1.66896	5.59212	11.1221	0.00260265	0.0484681	3	4	Down-regulated
Sus_scrofa___CYP4V2	-1.40508	3.93315	11.1358	0.00260775	0.0485235	3	4	Down-regulated
Sus_scrofa___CD3E	-3.49937	1.15295	10.2855	0.00261513	0.0485884	3	4	Down-regulated
Sus_scrofa___CDC25B	-1.44163	5.0652	11.107	0.00262369	0.0486342	3	4	Down-regulated
Sus_scrofa___LRFN5	-2.05208	4.86128	11.1099	0.00262429	0.0486342	3	4	Down-regulated
Sus_scrofa___ADAMTS12	-1.25879	9.13968	11.0714	0.0026479	0.0489159	3	4	Down-regulated
Sus_scrofa___ENSSSCG00000037995	-5.18981	1.56718	10.4124	0.00265777	0.0490026	3	4	Down-regulated
Sus_scrofa___TNXB	-1.74309	8.59735	11.0559	0.0026634	0.0490026	3	4	Down-regulated
Sus_scrofa___ENSSSCG00000024162	-1.41242	4.7743	10.9979	0.00273663	0.0499495	3	4	Down-regulated

## Sheet: Mural cells
Gene	logFC	logCPM	F	PValue	FDR	Observations_Extended	Observations_Control	level
Sus_scrofa___hCD46	9.03668	8.07607	123.773	7.01756e-13	1.32056e-08	3	4	Up-regulated
Sus_scrofa___PLOD2	3.05313	9.04643	59.2331	3.41257e-09	1.09854e-05	3	4	Up-regulated
Sus_scrofa___IGFBP2	4.15597	7.22994	46.5627	4.45846e-08	6.44694e-05	3	4	Up-regulated
Sus_scrofa___SOCS5	2.19169	8.72354	45.2925	6.48764e-08	7.4163e-05	3	4	Up-regulated
Sus_scrofa___BNIP3	3.5777	7.13222	43.912	8.91887e-08	9.32419e-05	3	4	Up-regulated
Sus_scrofa___PFKFB3	2.7301	7.23183	43.3185	1.04063e-07	9.39116e-05	3	4	Up-regulated
Sus_scrofa___RUNX1	3.57533	8.07293	40.9748	1.81119e-07	0.000136332	3	4	Up-regulated
Sus_scrofa___OSMR	2.5571	7.5765	40.2558	2.16956e-07	0.000157026	3	4	Up-regulated
Sus_scrofa___ACKR2	3.98244	7.09978	38.9336	2.52008e-07	0.00017564	3	4	Up-regulated
Sus_scrofa___RSAD2	6.654	6.56507	36.2247	3.44109e-07	0.000223291	3	4	Up-regulated
Sus_scrofa___EYA2	4.58265	5.89755	35.9869	4.3991e-07	0.000275941	3	4	Up-regulated
Sus_scrofa___HIF1A	2.61687	7.60332	36.9889	4.90627e-07	0.000294809	3	4	Up-regulated
Sus_scrofa___ENSSSCG00000016868	3.43191	7.50281	36.602	5.32656e-07	0.000294809	3	4	Up-regulated
Sus_scrofa___DDX60	5.64636	6.63816	34.1515	6.1729e-07	0.000331788	3	4	Up-regulated
Sus_scrofa___PDGFA	3.7093	5.96539	35.0157	6.7125e-07	0.000340263	3	4	Up-regulated
Sus_scrofa___GPC5	6.21268	8.04555	34.8872	6.87107e-07	0.000340263	3	4	Up-regulated
Sus_scrofa___KCNJ6	7.37346	4.4887	34.3837	8.13948e-07	0.000382922	3	4	Up-regulated
Sus_scrofa___FSTL5	4.32295	6.53896	34.0153	8.96044e-07	0.000389151	3	4	Up-regulated
Sus_scrofa___ZNFX1	2.91531	7.56907	34.6359	9.0842e-07	0.000389151	3	4	Up-regulated
Sus_scrofa___ADAMTS9	2.43827	9.93088	34.5682	9.10888e-07	0.000389151	3	4	Up-regulated
Sus_scrofa___CTPS1	4.1606	5.46147	32.7936	9.48294e-07	0.000389151	3	4	Up-regulated
Sus_scrofa___ENO1	3.60567	7.00339	33.9182	1.03396e-06	0.000413978	3	4	Up-regulated
Sus_scrofa___MX1	4.46197	7.76294	33.5783	1.19021e-06	0.000466614	3	4	Up-regulated
Sus_scrofa___SLC7A2	3.19261	7.20129	32.1422	1.7264e-06	0.00060162	3	4	Up-regulated
Sus_scrofa___PAPPA	3.67946	8.31511	31.8519	1.91685e-06	0.000655841	3	4	Up-regulated
Sus_scrofa___IPO5	2.42147	6.42473	31.6059	2.06518e-06	0.0006818	3	4	Up-regulated
Sus_scrofa___HK2	5.99922	5.97146	31.1818	2.2075e-06	0.000704079	3	4	Up-regulated
Sus_scrofa___NAB1	2.00255	6.8463	31.1227	2.36301e-06	0.000735509	3	4	Up-regulated
Sus_scrofa___VMP1	2.08938	8.05306	30.192	3.04082e-06	0.000922938	3	4	Up-regulated
Sus_scrofa___C1RL	3.18549	5.10386	27.3956	4.26856e-06	0.0011484	3	4	Up-regulated
Sus_scrofa___KCNK12	6.24955	4.01743	26.3486	4.53285e-06	0.00119461	3	4	Up-regulated
Sus_scrofa___NOL11	2.33248	9.98623	28.7543	4.57071e-06	0.00119461	3	4	Up-regulated
Sus_scrofa___RAI14	4.00216	8.01721	28.6858	4.71551e-06	0.00120327	3	4	Up-regulated
Sus_scrofa___STC1	3.44511	6.1049	28.2701	5.08886e-06	0.00126003	3	4	Up-regulated
Sus_scrofa___SEMA5B	2.85624	6.86725	27.8441	5.40223e-06	0.00126953	3	4	Up-regulated
Sus_scrofa___SYCP2	2.56575	7.17176	28.1846	5.46454e-06	0.00126953	3	4	Up-regulated
Sus_scrofa___ELL2	3.16217	7.19118	27.9522	5.75089e-06	0.00130386	3	4	Up-regulated
Sus_scrofa___CLSTN3	6.56194	4.29125	26.1314	5.87932e-06	0.00131711	3	4	Up-regulated
Sus_scrofa___PLAT	4.25015	5.63077	25.7216	6.16165e-06	0.00134825	3	4	Up-regulated
Sus_scrofa___MRPS27	1.99129	7.01049	26.9319	7.93149e-06	0.00165839	3	4	Up-regulated
Sus_scrofa___BST2	4.66084	6.23487	25.6471	8.50458e-06	0.00173789	3	4	Up-regulated
Sus_scrofa___CMPK2	5.53437	6.05533	25.2891	9.19133e-06	0.00180169	3	4	Up-regulated
Sus_scrofa___GBE1	2.12637	7.67187	26.31	9.48092e-06	0.0018393	3	4	Up-regulated
Sus_scrofa___HSPA5	3.41392	5.60273	25.1911	1.00503e-05	0.00191036	3	4	Up-regulated
Sus_scrofa___ENSSSCG00000012006	2.73955	5.94743	25.3575	1.22985e-05	0.00221305	3	4	Up-regulated
Sus_scrofa___ANO4	4.31013	6.93564	25.072	1.34022e-05	0.00230473	3	4	Up-regulated
Sus_scrofa___ADAMTS2	3.04545	7.19336	25.1747	1.34722e-05	0.00230473	3	4	Up-regulated
Sus_scrofa___PRRG1	2.94013	6.1634	24.5942	1.50818e-05	0.00251159	3	4	Up-regulated
Sus_scrofa___UCK2	3.08204	5.92791	23.8193	1.76863e-05	0.00277351	3	4	Up-regulated
Sus_scrofa___ENSSSCG00000016263	2.41905	7.81273	24.1556	1.8449e-05	0.00286921	3	4	Up-regulated
Sus_scrofa___PLCXD3	3.57349	5.42221	23.0625	1.88951e-05	0.00291449	3	4	Up-regulated
Sus_scrofa___ISG15	5.69649	6.74442	23.3915	1.92901e-05	0.00292743	3	4	Up-regulated
Sus_scrofa___HTRA3	3.92534	4.96149	22.268	2.06266e-05	0.0030563	3	4	Up-regulated
Sus_scrofa___ZNF662	2.56704	7.15015	23.4566	2.25974e-05	0.00322149	3	4	Up-regulated
Sus_scrofa___PLAC9	3.8709	5.304	22.6204	2.3242e-05	0.00328615	3	4	Up-regulated
Sus_scrofa___ENSSSCG00000038594	3.8087	5.5903	22.5976	2.388e-05	0.00330421	3	4	Up-regulated
Sus_scrofa___C7	2.83598	8.47065	23.1688	2.50753e-05	0.00341933	3	4	Up-regulated
Sus_scrofa___ZMAT3	4.582	4.89009	22.3522	2.55979e-05	0.00345368	3	4	Up-regulated
Sus_scrofa___AGFG1	1.77072	7.21707	23.0321	2.63504e-05	0.00351675	3	4	Up-regulated
Sus_scrofa___HERC6	3.29969	8.70752	22.7999	2.82242e-05	0.00364447	3	4	Up-regulated
Sus_scrofa___UBAP2	1.50878	8.03738	22.7939	2.82758e-05	0.00364447	3	4	Up-regulated
Sus_scrofa___CRISPLD2	2.45021	6.70194	22.7046	2.94503e-05	0.00374457	3	4	Up-regulated
Sus_scrofa___PSMB9	3.32655	4.70296	21.2957	3.01502e-05	0.0038071	3	4	Up-regulated
Sus_scrofa___OAS2	4.20658	8.78769	22.5783	3.03467e-05	0.0038071	3	4	Up-regulated
Sus_scrofa___SLC20A2	2.18322	7.43362	22.4056	3.2303e-05	0.00399919	3	4	Up-regulated
Sus_scrofa___PPA1	2.31575	5.95142	22.0751	3.50217e-05	0.00427947	3	4	Up-regulated
Sus_scrofa___FAM13A	1.61376	9.09165	22.0336	3.60991e-05	0.00432492	3	4	Up-regulated
Sus_scrofa___KHDRBS3	3.96763	6.31451	21.7082	3.75193e-05	0.00441274	3	4	Up-regulated
Sus_scrofa___PHC2	1.73301	7.54158	21.5336	4.27018e-05	0.00489795	3	4	Up-regulated
Sus_scrofa___HECTD2	2.03738	6.62032	21.5179	4.32065e-05	0.00489795	3	4	Up-regulated
Sus_scrofa___PARP14	4.08917	6.51977	21.0609	4.6318e-05	0.00515747	3	4	Up-regulated
Sus_scrofa___UPP1	5.77575	4.39423	20.7368	4.67821e-05	0.00516805	3	4	Up-regulated
Sus_scrofa___GRM5	2.99888	5.32587	20.5557	5.04189e-05	0.00534151	3	4	Up-regulated
Sus_scrofa___MX2	4.7779	8.26705	20.7383	5.19565e-05	0.0054621	3	4	Up-regulated
Sus_scrofa___ADM	5.80322	4.30329	20.2677	5.50726e-05	0.00563237	3	4	Up-regulated
Sus_scrofa___FAM162A	2.5354	5.65841	20.4397	5.95224e-05	0.00595794	3	4	Up-regulated
Sus_scrofa___LAMC3	3.51085	4.71698	19.3674	6.71056e-05	0.00644282	3	4	Up-regulated
Sus_scrofa___ENSSSCG00000004578	2.11279	6.58745	20.1524	6.81559e-05	0.00651045	3	4	Up-regulated
Sus_scrofa___TMEM39A	1.83437	6.28967	20.0377	7.08628e-05	0.00665651	3	4	Up-regulated
Sus_scrofa___LRRFIP1	1.9138	8.99362	19.9279	7.27327e-05	0.00665651	3	4	Up-regulated
Sus_scrofa___ECM1	2.90094	5.0308	19.3588	7.28686e-05	0.00665651	3	4	Up-regulated
Sus_scrofa___PCMT1	1.88691	6.57595	19.9128	7.37188e-05	0.00670165	3	4	Up-regulated
Sus_scrofa___IFIT1	3.24306	6.13755	19.5671	7.90415e-05	0.00698311	3	4	Up-regulated
Sus_scrofa___PSMD14	1.82058	6.62895	19.6754	7.99839e-05	0.00700275	3	4	Up-regulated
Sus_scrofa___PIEZO2	2.62688	6.83134	19.6453	8.07523e-05	0.00700275	3	4	Up-regulated
Sus_scrofa___RGS2	4.01609	6.03637	19.2745	8.23379e-05	0.00704289	3	4	Up-regulated
Sus_scrofa___TAF4B	2.82687	5.94133	19.2474	8.49515e-05	0.00710497	3	4	Up-regulated
Sus_scrofa___MDM2	1.86056	7.69877	19.4599	8.55435e-05	0.00712282	3	4	Up-regulated
Sus_scrofa___MTO1	2.63702	5.37771	19.1193	8.89031e-05	0.00731172	3	4	Up-regulated
Sus_scrofa___TRIM13	2.16345	6.43226	19.3455	8.89778e-05	0.00731172	3	4	Up-regulated
Sus_scrofa___ECE1	1.9184	6.69248	19.3214	9.04011e-05	0.00736899	3	4	Up-regulated
Sus_scrofa___HGF	1.80116	8.24565	19.2911	9.04579e-05	0.00736899	3	4	Up-regulated
Sus_scrofa___COL12A1	3.26453	7.64413	19.123	9.62674e-05	0.00780845	3	4	Up-regulated
Sus_scrofa___PNPT1	2.21939	6.20813	18.9252	0.000102854	0.00823621	3	4	Up-regulated
Sus_scrofa___ERO1A	1.69303	6.85819	18.8838	0.000104824	0.00835839	3	4	Up-regulated
Sus_scrofa___CHSY1	1.76561	8.06809	18.7045	0.000111063	0.00877012	3	4	Up-regulated
Sus_scrofa___CBLB	1.53248	9.52007	18.6866	0.000111386	0.00877012	3	4	Up-regulated
Sus_scrofa___RAB5A	1.68239	6.58493	18.6423	0.000114168	0.00891461	3	4	Up-regulated
Sus_scrofa___PDE4A	2.31656	6.66797	18.4819	0.000120258	0.00923679	3	4	Up-regulated
Sus_scrofa___SLC16A3	5.57538	4.48883	18.2489	0.000121558	0.00929871	3	4	Up-regulated
Sus_scrofa___HERC5	3.84099	7.52094	18.3046	0.000128041	0.00966761	3	4	Up-regulated
Sus_scrofa___KLF10	2.43962	5.09348	17.9245	0.000130207	0.00971535	3	4	Up-regulated
Sus_scrofa___YIPF2	1.8629	6.48006	18.2197	0.000132333	0.00976569	3	4	Up-regulated
Sus_scrofa___DSCAM	5.13233	3.83782	17.279	0.000133207	0.00979173	3	4	Up-regulated
Sus_scrofa___TOPAZ1	2.25189	6.26155	18.1209	0.000136448	0.00999098	3	4	Up-regulated
Sus_scrofa___ZNF697	1.97445	6.46805	18.0745	0.000139374	0.0101508	3	4	Up-regulated
Sus_scrofa___EIF4E	2.15692	5.9847	17.9748	0.000139709	0.0101508	3	4	Up-regulated
Sus_scrofa___TGM2	2.38347	6.45731	17.9838	0.000143189	0.0103151	3	4	Up-regulated
Sus_scrofa___SGMS2	3.15626	4.95356	17.2789	0.000148845	0.010619	3	4	Up-regulated
Sus_scrofa___GADD45B	2.90049	5.43649	17.6156	0.000149223	0.010619	3	4	Up-regulated
Sus_scrofa___SNX10	1.93999	7.3507	17.7233	0.000157147	0.0110343	3	4	Up-regulated
Sus_scrofa___CACNA1D	2.37778	6.84881	17.6727	0.000160296	0.0111721	3	4	Up-regulated
Sus_scrofa___CALU	1.5133	7.41826	17.6318	0.000162017	0.0112503	3	4	Up-regulated
Sus_scrofa___REEP3	1.40073	8.04899	17.5507	0.000166337	0.0113001	3	4	Up-regulated
Sus_scrofa___RYK	1.34416	7.51658	17.493	0.000170062	0.0115116	3	4	Up-regulated
Sus_scrofa___ST3GAL1	1.75199	6.47722	17.4513	0.000173609	0.0116512	3	4	Up-regulated
Sus_scrofa___ENSSSCG00000051306	4.93771	4.72223	17.0161	0.000173981	0.0116512	3	4	Up-regulated
Sus_scrofa___SLCO2B1	2.62427	5.07728	17.0151	0.000184103	0.0120448	3	4	Up-regulated
Sus_scrofa___THBS1	3.01067	8.22332	17.2678	0.000184392	0.0120448	3	4	Up-regulated
Sus_scrofa___GNL3	2.35832	5.69582	17.1254	0.000185942	0.0120448	3	4	Up-regulated
Sus_scrofa___STK39	1.79528	9.98722	17.1042	0.000194883	0.0122845	3	4	Up-regulated
Sus_scrofa___DNAJB9	5.12463	4.33749	16.6566	0.000195446	0.0122845	3	4	Up-regulated
Sus_scrofa___ENSSSCG00000042008	5.20119	3.91649	16.2495	0.000196147	0.0122845	3	4	Up-regulated
Sus_scrofa___PRKAR1B	1.7986	6.64596	17.1066	0.000196495	0.0122845	3	4	Up-regulated
Sus_scrofa___BAALC	3.35838	5.20262	16.3691	0.000209222	0.0128665	3	4	Up-regulated
Sus_scrofa___GPRC5A	3.97704	4.70546	16.1819	0.000211447	0.0129609	3	4	Up-regulated
Sus_scrofa___PARP12	2.50671	6.92927	16.8618	0.000214438	0.0131016	3	4	Up-regulated
Sus_scrofa___FUNDC1	2.67038	4.34135	15.9054	0.000224027	0.013512	3	4	Up-regulated
Sus_scrofa___PRKD1	1.75189	7.38365	16.6809	0.000227901	0.0136581	3	4	Up-regulated
Sus_scrofa___SRPRB	1.92245	5.55607	16.5447	0.000229985	0.0137139	3	4	Up-regulated
Sus_scrofa___RHBDF2	4.1834	4.34528	15.9783	0.000247553	0.0145123	3	4	Up-regulated
Sus_scrofa___HK1	1.68856	7.70194	16.4187	0.000250331	0.0146296	3	4	Up-regulated
Sus_scrofa___FARSA	3.40687	4.51539	15.7256	0.00026099	0.0151308	3	4	Up-regulated
Sus_scrofa___BTG3	1.98944	6.65283	16.2935	0.000263365	0.0152025	3	4	Up-regulated
Sus_scrofa___OLA1	1.77003	6.97873	16.1329	0.000279242	0.0157601	3	4	Up-regulated
Sus_scrofa___ENSSSCG00000017146	2.48574	8.18469	16.1149	0.00027974	0.0157601	3	4	Up-regulated
Sus_scrofa___LAMB1	1.77243	7.86998	16.0664	0.000284811	0.0157601	3	4	Up-regulated
Sus_scrofa___CLCN5	1.58027	7.15736	16.07	0.000285588	0.0157601	3	4	Up-regulated
Sus_scrofa___SCFD2	1.33393	7.98359	15.9915	0.000292447	0.0159898	3	4	Up-regulated
Sus_scrofa___NFIL3	3.42387	4.80069	15.5903	0.000293149	0.0159898	3	4	Up-regulated
Sus_scrofa___EIF2AK2	2.50424	8.31288	15.9075	0.000301757	0.0162242	3	4	Up-regulated
Sus_scrofa___ADAM32	2.81858	4.95939	15.4179	0.00030359	0.0162762	3	4	Up-regulated
Sus_scrofa___ENSSSCG00000025500	2.9058	4.85734	15.4026	0.000305911	0.0163214	3	4	Up-regulated
Sus_scrofa___NAMPT	2.38843	6.0904	15.7952	0.000310758	0.0165194	3	4	Up-regulated
Sus_scrofa___LIN7A	2.27032	5.89841	15.7692	0.000312166	0.0165475	3	4	Up-regulated
Sus_scrofa___NTNG2	3.38384	3.98914	14.9812	0.000340003	0.0177727	3	4	Up-regulated
Sus_scrofa___USP18	3.25487	6.18248	15.4766	0.000344254	0.0177827	3	4	Up-regulated
Sus_scrofa___SLC17A9	5.19505	4.12201	14.9867	0.000344918	0.0177827	3	4	Up-regulated
Sus_scrofa___C2CD3	1.45021	6.96973	15.4725	0.000356095	0.0182224	3	4	Up-regulated
Sus_scrofa___SERPINH1	1.94295	5.92695	15.447	0.000356352	0.0182224	3	4	Up-regulated
Sus_scrofa___TP53BP2	1.59311	7.52743	15.3929	0.000365643	0.0186468	3	4	Up-regulated
Sus_scrofa___LITAF	1.39795	6.95536	15.3853	0.000367619	0.0186969	3	4	Up-regulated
Sus_scrofa___NT5DC2	2.86106	4.7718	14.8821	0.000369993	0.0187382	3	4	Up-regulated
Sus_scrofa___TRIB2	1.82079	6.64817	15.3729	0.000370422	0.0187382	3	4	Up-regulated
Sus_scrofa___SLC39A14	1.42901	8.94738	15.3228	0.000374415	0.0187886	3	4	Up-regulated
Sus_scrofa___PLAA	1.67513	6.30821	15.302	0.000379763	0.0190063	3	4	Up-regulated
Sus_scrofa___ADK	1.84849	6.87352	15.2824	0.000382637	0.0190489	3	4	Up-regulated
Sus_scrofa___RBFOX3	4.06539	4.00545	14.7967	0.000391043	0.0192826	3	4	Up-regulated
Sus_scrofa___LUZP1	1.23775	8.12631	15.1988	0.000392456	0.0192826	3	4	Up-regulated
Sus_scrofa___IL4R	1.82587	7.2073	15.1504	0.000401436	0.0196213	3	4	Up-regulated
Sus_scrofa___ADAM12	2.77649	9.03912	15.1228	0.000403861	0.0196888	3	4	Up-regulated
Sus_scrofa___CRLF1	5.27759	3.96302	14.939	0.000406525	0.0197457	3	4	Up-regulated
Sus_scrofa___NDRG1	2.15855	6.18656	14.9288	0.000421284	0.0201723	3	4	Up-regulated
Sus_scrofa___XPNPEP3	1.72638	5.87452	14.9976	0.000424998	0.0202149	3	4	Up-regulated
Sus_scrofa___ENSSSCG00000017754	2.46755	5.91732	14.8497	0.000428249	0.0202149	3	4	Up-regulated
Sus_scrofa___PARP9	2.54942	5.15836	14.6171	0.000430162	0.020237	3	4	Up-regulated
Sus_scrofa___ATP8A2	2.70341	6.14494	14.8821	0.000433662	0.0203291	3	4	Up-regulated
Sus_scrofa___IFI44	2.83747	7.10784	14.9407	0.000434471	0.0203291	3	4	Up-regulated
Sus_scrofa___TMEM165	2.22089	5.58294	14.7692	0.000435361	0.0203291	3	4	Up-regulated
Sus_scrofa___PAPSS1	1.50599	7.03622	14.8944	0.000442061	0.0205743	3	4	Up-regulated
Sus_scrofa___ELF4	2.97608	4.5859	14.2132	0.00044786	0.0206815	3	4	Up-regulated
Sus_scrofa___SPOCK1	2.43332	7.56928	14.8436	0.000449408	0.0206815	3	4	Up-regulated
Sus_scrofa___TTC27	1.81946	6.49048	14.851	0.000449501	0.0206815	3	4	Up-regulated
Sus_scrofa___SPATA5	1.38309	8.32203	14.7162	0.000470886	0.0214555	3	4	Up-regulated
Sus_scrofa___ZC3HAV1	1.88501	6.92617	14.6997	0.000475753	0.0215728	3	4	Up-regulated
Sus_scrofa___LRPPRC	1.58381	6.60595	14.6005	0.000494478	0.0222078	3	4	Up-regulated
Sus_scrofa___CABCOCO1	2.03613	6.16353	14.5573	0.000503092	0.0224842	3	4	Up-regulated
Sus_scrofa___ATP13A3	2.03535	6.69343	14.3609	0.000540559	0.0235469	3	4	Up-regulated
Sus_scrofa___KDM4C	1.29487	7.58059	14.3478	0.000542084	0.0235587	3	4	Up-regulated
Sus_scrofa___SFRP1	3.07552	4.32213	13.5633	0.00054522	0.0235877	3	4	Up-regulated
Sus_scrofa___SLC39A6	2.06449	5.70855	14.2599	0.000554944	0.0239517	3	4	Up-regulated
Sus_scrofa___LZTS1	2.24474	6.37631	14.1543	0.000565731	0.024147	3	4	Up-regulated
Sus_scrofa___GHRL	1.91497	7.50269	14.1827	0.000577794	0.0245811	3	4	Up-regulated
Sus_scrofa___CEP55	3.93901	3.99853	13.7139	0.000588639	0.0248315	3	4	Up-regulated
Sus_scrofa___PRKAR2A	1.38977	7.66128	14.1212	0.000591055	0.0248315	3	4	Up-regulated
Sus_scrofa___MB21D2	1.74316	6.21286	14.0936	0.000599896	0.0250307	3	4	Up-regulated
Sus_scrofa___PI15	3.30221	6.52102	13.7112	0.000607828	0.0253055	3	4	Up-regulated
Sus_scrofa___PCP4L1	3.44388	3.85991	13.3963	0.000621193	0.0256351	3	4	Up-regulated
Sus_scrofa___ENSSSCG00000001394	3.87648	4.07536	13.3041	0.000635026	0.0260347	3	4	Up-regulated
Sus_scrofa___SLC10A7	1.45439	7.39077	13.9235	0.000639292	0.0260959	3	4	Up-regulated
Sus_scrofa___SEPTIN9	1.44163	7.31911	13.915	0.000641066	0.0261116	3	4	Up-regulated
Sus_scrofa___PML	2.183	7.2665	13.9063	0.000644045	0.0261763	3	4	Up-regulated
Sus_scrofa___LGALS3BP	3.47999	4.7971	13.4051	0.000656104	0.0265517	3	4	Up-regulated
Sus_scrofa___ADAMTS3	3.31513	6.24163	13.6364	0.000670445	0.0267297	3	4	Up-regulated
Sus_scrofa___PLEKHA4	2.30449	5.58365	13.6101	0.00068872	0.0270723	3	4	Up-regulated
Sus_scrofa___GLDC	5.26883	3.82491	13.2155	0.000704333	0.0273281	3	4	Up-regulated
Sus_scrofa___SPSB1	2.22753	5.51175	13.5715	0.000713432	0.0276242	3	4	Up-regulated
Sus_scrofa___RHOD	3.01765	4.15187	12.8816	0.000715946	0.0276646	3	4	Up-regulated
Sus_scrofa___UGP2	1.5551	7.1633	13.5843	0.000729825	0.0280856	3	4	Up-regulated
Sus_scrofa___OSGIN1	2.74831	4.6809	13.0711	0.000734957	0.0281703	3	4	Up-regulated
Sus_scrofa___POLR1F	1.55063	6.24327	13.5139	0.000750812	0.028543	3	4	Up-regulated
Sus_scrofa___LARS1	1.25957	7.29348	13.4289	0.000773546	0.0290914	3	4	Up-regulated
Sus_scrofa___SLC2A13	1.31396	7.1702	13.4192	0.000777444	0.0290914	3	4	Up-regulated
Sus_scrofa___PHF21B	5.01194	3.73469	12.7615	0.000801207	0.029592	3	4	Up-regulated
Sus_scrofa___AMH	2.35206	5.09908	13.1709	0.000802437	0.029592	3	4	Up-regulated
Sus_scrofa___NETO2	1.98884	5.38735	13.2381	0.000803974	0.029592	3	4	Up-regulated
Sus_scrofa___KANK2	1.32395	7.05162	13.3301	0.000804203	0.029592	3	4	Up-regulated
Sus_scrofa___ENSSSCG00000034570	4.04281	7.83168	13.2891	0.000805139	0.029592	3	4	Up-regulated
Sus_scrofa___ADAMTS4	2.29343	6.2533	13.2981	0.000811056	0.0296935	3	4	Up-regulated
Sus_scrofa___SLC6A7	2.14443	5.47131	13.2018	0.000814623	0.0297662	3	4	Up-regulated
Sus_scrofa___DCTPP1	2.69872	4.65224	12.7874	0.000817718	0.0298214	3	4	Up-regulated
Sus_scrofa___ETV7	1.7664	6.19855	13.2184	0.000842242	0.0305971	3	4	Up-regulated
Sus_scrofa___CASP10	1.59703	6.56252	13.214	0.000844301	0.0306128	3	4	Up-regulated
Sus_scrofa___PSMA3	1.53418	6.36507	13.1901	0.000852471	0.0307904	3	4	Up-regulated
Sus_scrofa___SEC13	1.61091	6.36807	13.1328	0.000870867	0.0313345	3	4	Up-regulated
Sus_scrofa___IFIH1	2.02044	7.0954	13.1184	0.000875665	0.0314435	3	4	Up-regulated
Sus_scrofa___PKDCC	1.7362	7.01074	13.0996	0.000881157	0.0315196	3	4	Up-regulated
Sus_scrofa___PITRM1	1.87288	5.76483	13.0162	0.000904188	0.0320566	3	4	Up-regulated
Sus_scrofa___IARS1	1.16916	7.57337	13.0179	0.000907971	0.0320566	3	4	Up-regulated
Sus_scrofa___KLHL29	1.73295	7.90888	12.9839	0.000920043	0.0322409	3	4	Up-regulated
Sus_scrofa___NAA25	1.48746	6.51868	12.954	0.000935225	0.032712	3	4	Up-regulated
Sus_scrofa___PABPC1	1.37131	7.15345	12.8729	0.0009633	0.0335692	3	4	Up-regulated
Sus_scrofa___IL17D	1.89676	5.91438	12.808	0.000971736	0.0338006	3	4	Up-regulated
Sus_scrofa___USO1	1.35659	6.98345	12.8247	0.000982659	0.0341175	3	4	Up-regulated
Sus_scrofa___FBXO24	4.54006	3.98493	12.4006	0.000988394	0.0341433	3	4	Up-regulated
Sus_scrofa___NEO1	1.12269	8.01548	12.7988	0.000988847	0.0341433	3	4	Up-regulated
Sus_scrofa___ROR2	1.54463	7.92005	12.7769	0.000998049	0.0343351	3	4	Up-regulated
Sus_scrofa___DPH1	2.23966	5.27436	12.6813	0.00100314	0.0344473	3	4	Up-regulated
Sus_scrofa___TBC1D32	1.85849	6.0134	12.709	0.00101315	0.0346784	3	4	Up-regulated
Sus_scrofa___GART	1.99824	5.38035	12.6495	0.00101531	0.0346784	3	4	Up-regulated
Sus_scrofa___CCT7	1.89959	5.39544	12.6646	0.0010154	0.0346784	3	4	Up-regulated
Sus_scrofa___HIRA	1.77113	5.97712	12.7043	0.00102577	0.0347972	3	4	Up-regulated
Sus_scrofa___UNC5B	1.46935	7.11657	12.701	0.00103087	0.0348902	3	4	Up-regulated
Sus_scrofa___phTBM	4.87876	3.78282	12.1639	0.0010368	0.0350279	3	4	Up-regulated
Sus_scrofa___MFSD12	2.41623	4.71485	12.2172	0.00107137	0.0359496	3	4	Up-regulated
Sus_scrofa___CCND1	2.13221	6.27837	12.6038	0.00107173	0.0359496	3	4	Up-regulated
Sus_scrofa___ENSSSCG00000010448	2.58285	4.40252	12.043	0.00108061	0.036183	3	4	Up-regulated
Sus_scrofa___CCDC191	1.70534	5.66804	12.5519	0.00108644	0.0362493	3	4	Up-regulated
Sus_scrofa___MRPS30	2.50787	5.57596	12.3947	0.00109545	0.0364854	3	4	Up-regulated
Sus_scrofa___CMKLR1	2.15149	4.95132	12.2631	0.00111519	0.0370119	3	4	Up-regulated
Sus_scrofa___TNC	3.11925	6.89383	12.4634	0.001128	0.0372398	3	4	Up-regulated
Sus_scrofa___DCX	2.4093	4.7769	12.2229	0.00113049	0.0372568	3	4	Up-regulated
Sus_scrofa___ZBP1	2.32731	6.00359	12.3893	0.00113928	0.0374808	3	4	Up-regulated
Sus_scrofa___STK38L	1.69594	8.60755	12.3953	0.00116099	0.0380618	3	4	Up-regulated
Sus_scrofa___TTC12	4.48902	3.78134	11.9083	0.00116729	0.0380982	3	4	Up-regulated
Sus_scrofa___ZNF146	1.21327	7.26355	12.3618	0.00117929	0.0383943	3	4	Up-regulated
Sus_scrofa___DHX58	4.26218	4.4034	12.0388	0.00118916	0.0385631	3	4	Up-regulated
Sus_scrofa___EIF4EBP1	2.24315	4.74802	11.9432	0.00119725	0.0387028	3	4	Up-regulated
Sus_scrofa___C12orf73	2.45774	4.67333	11.9767	0.00119905	0.0387028	3	4	Up-regulated
Sus_scrofa___DBF4	1.71222	5.63136	12.294	0.00120428	0.0388051	3	4	Up-regulated
Sus_scrofa___CCDC126	1.90645	5.44666	12.1796	0.00122274	0.0389817	3	4	Up-regulated
Sus_scrofa___KPNA3	1.6024	6.23792	12.2697	0.00122426	0.0389817	3	4	Up-regulated
Sus_scrofa___MLKL	2.05909	4.96718	12.0696	0.00122714	0.0390073	3	4	Up-regulated
Sus_scrofa___ENSSSCG00000016444	2.3852	4.18052	11.6963	0.00123639	0.0392352	3	4	Up-regulated
Sus_scrofa___CACNA2D1	1.09205	9.62292	12.2183	0.00124579	0.0394669	3	4	Up-regulated
Sus_scrofa___SMARCA4	1.37528	6.94639	12.2232	0.00124878	0.0394951	3	4	Up-regulated
Sus_scrofa___PMAIP1	4.72396	3.74005	11.7698	0.00127749	0.0400663	3	4	Up-regulated
Sus_scrofa___COPZ1	2.36246	4.47505	11.8016	0.00128502	0.040202	3	4	Up-regulated
Sus_scrofa___PALB2	1.87327	5.01713	11.9951	0.00128609	0.040202	3	4	Up-regulated
Sus_scrofa___ENSSSCG00000009240	2.68879	5.2926	11.7943	0.00129471	0.0403524	3	4	Up-regulated
Sus_scrofa___WFDC1	2.04455	7.52432	12.1293	0.00129618	0.0403524	3	4	Up-regulated
Sus_scrofa___ARAP2	1.41837	7.52215	12.1237	0.00129737	0.0403524	3	4	Up-regulated
Sus_scrofa___LAMC1	0.9374	9.86332	12.1134	0.00129948	0.0403524	3	4	Up-regulated
Sus_scrofa___TRIM46	2.9283	3.92148	11.4702	0.00130875	0.0404182	3	4	Up-regulated
Sus_scrofa___GALNT18	1.29652	9.07659	12.0895	0.00131231	0.0404182	3	4	Up-regulated
Sus_scrofa___BCL3	2.33721	4.72563	11.8554	0.00131234	0.0404182	3	4	Up-regulated
Sus_scrofa___CGAS	2.55112	4.67009	11.6132	0.00135443	0.0414434	3	4	Up-regulated
Sus_scrofa___PTPA	1.95691	5.62455	11.9622	0.00136947	0.0416825	3	4	Up-regulated
Sus_scrofa___MAFF	2.45884	5.39617	11.8712	0.00138163	0.0418671	3	4	Up-regulated
Sus_scrofa___STT3B	1.19869	7.23661	11.9162	0.00141135	0.0421939	3	4	Up-regulated
Sus_scrofa___DNAJC13	1.23886	7.96989	11.9087	0.00141259	0.0421939	3	4	Up-regulated
Sus_scrofa___POLQ	2.68178	4.63632	11.5208	0.00142799	0.0424517	3	4	Up-regulated
Papio_anubis_DAPK1	4.65951	3.4062	12.0042	0.00143346	0.0425066	3	4	Up-regulated
Sus_scrofa___PDIA5	1.93775	5.7278	11.7936	0.00143816	0.0425066	3	4	Up-regulated
Sus_scrofa___SERPINE1	2.65647	7.83744	11.8681	0.00144113	0.0425066	3	4	Up-regulated
Sus_scrofa___ENSSSCG00000047553	2.45099	6.51083	11.8359	0.00144713	0.0426167	3	4	Up-regulated
Sus_scrofa___ENSSSCG00000016226	1.78935	5.82886	11.8066	0.00145353	0.0426769	3	4	Up-regulated
Sus_scrofa___PDLIM7	1.75218	7.54485	11.8358	0.001457	0.0426769	3	4	Up-regulated
Sus_scrofa___ENSSSCG00000031163	4.64543	3.54217	11.6618	0.00145825	0.0426769	3	4	Up-regulated
Sus_scrofa___ENSSSCG00000010517	2.711	4.43873	11.2737	0.00149089	0.0434971	3	4	Up-regulated
Sus_scrofa___GLIS3	1.54822	7.74785	11.7679	0.00149813	0.0436406	3	4	Up-regulated
Sus_scrofa___SETX	1.53007	8.3586	11.7087	0.00153191	0.0444039	3	4	Up-regulated
Sus_scrofa___TTC39B	1.80532	6.92297	11.7127	0.00153377	0.0444039	3	4	Up-regulated
Sus_scrofa___POLR1A	1.99138	5.2653	11.5536	0.00155302	0.0448351	3	4	Up-regulated
Sus_scrofa___ENSSSCG00000032525	4.97973	3.64269	11.2976	0.00155343	0.0448351	3	4	Up-regulated
Sus_scrofa___CACYBP	1.90134	6.07524	11.6656	0.00156333	0.0449829	3	4	Up-regulated
Sus_scrofa___DPP3	2.10183	4.81695	11.1946	0.00159132	0.0456487	3	4	Up-regulated
Sus_scrofa___COPA	1.22963	7.12215	11.6144	0.00159525	0.0456918	3	4	Up-regulated
Sus_scrofa___YPEL2	1.25624	7.53634	11.577	0.00161852	0.0462877	3	4	Up-regulated
Sus_scrofa___ALDH18A1	1.78148	5.58133	11.4593	0.00163022	0.046481	3	4	Up-regulated
Sus_scrofa___RPF2	1.88048	5.70379	11.5128	0.00165264	0.0468365	3	4	Up-regulated
Sus_scrofa___SCARA3	2.0062	4.67654	11.251	0.0016704	0.0471269	3	4	Up-regulated
Sus_scrofa___PTGIR	2.54207	4.00365	10.9591	0.00167297	0.0471286	3	4	Up-regulated
Sus_scrofa___ARMC12	4.17573	3.81787	11.0514	0.00170754	0.0479589	3	4	Up-regulated
Sus_scrofa___BAG3	3.31589	4.84538	11.1369	0.00171881	0.0480602	3	4	Up-regulated
Sus_scrofa___MYO9B	1.20271	7.95113	11.4164	0.00172657	0.0481341	3	4	Up-regulated
Sus_scrofa___SLC41A2	1.73654	6.18588	11.4022	0.00174067	0.048247	3	4	Up-regulated
Sus_scrofa___PLVAP	3.26686	4.52624	11.0583	0.00176521	0.048839	3	4	Up-regulated
Sus_scrofa___BIRC3	1.32569	7.72565	11.3369	0.00178439	0.048839	3	4	Up-regulated
Sus_scrofa___PLEKHA8	1.5187	5.8376	11.3384	0.00178559	0.048839	3	4	Up-regulated
Sus_scrofa___ABCA8	-4.10182	7.11083	70.9777	2.97459e-10	2.56314e-06	3	4	Down-regulated
Sus_scrofa___ARHGAP44	-4.72728	6.42805	67.5793	4.0862e-10	2.56314e-06	3	4	Down-regulated
Sus_scrofa___PTPRQ	-5.59692	5.62558	56.5965	5.47635e-10	2.57635e-06	3	4	Down-regulated
Sus_scrofa___SPARCL1	-2.45326	9.32623	59.0756	3.50261e-09	1.09854e-05	3	4	Down-regulated
Sus_scrofa___PLCB4	-2.92229	10.5457	56.3826	5.97248e-09	1.60557e-05	3	4	Down-regulated
Sus_scrofa___ADAM22	-4.30408	7.42844	50.3833	2.08951e-08	4.91504e-05	3	4	Down-regulated
Sus_scrofa___SH3RF2	-3.27006	7.45596	48.9971	2.84602e-08	5.95072e-05	3	4	Down-regulated
Sus_scrofa___SYT9	-4.33242	5.92431	46.4484	3.36457e-08	6.33144e-05	3	4	Down-regulated
Sus_scrofa___SCN7A	-4.44705	5.40515	42.6011	4.02192e-08	6.44694e-05	3	4	Down-regulated
Sus_scrofa___ST6GALNAC3	-3.02282	6.67866	45.604	4.55045e-08	6.44694e-05	3	4	Down-regulated
Sus_scrofa___ENSSSCG00000015747	-7.07737	7.13489	45.4682	4.79632e-08	6.44694e-05	3	4	Down-regulated
Sus_scrofa___ENSSSCG00000043817	-2.42892	7.52302	45.4414	6.34583e-08	7.4163e-05	3	4	Down-regulated
Sus_scrofa___ENSSSCG00000012101	-4.08493	4.95725	39.5335	6.69981e-08	7.4163e-05	3	4	Down-regulated
Sus_scrofa___ADAMTS16	-3.34422	5.47549	38.1832	1.00244e-07	9.39116e-05	3	4	Down-regulated
Sus_scrofa___RCAN2	-2.67049	10.0267	43.2222	1.04801e-07	9.39116e-05	3	4	Down-regulated
Sus_scrofa___ENSSSCG00000024162	-3.47291	7.30128	42.8442	1.17693e-07	0.000100671	3	4	Down-regulated
Sus_scrofa___ST6GALNAC5	-4.02796	5.23455	37.6805	1.35118e-07	0.00011055	3	4	Down-regulated
Sus_scrofa___KLHL13	-3.383	6.39082	40.7203	1.77263e-07	0.000136332	3	4	Down-regulated
Sus_scrofa___SAMD5	-3.18313	5.53555	37.0622	3.05198e-07	0.000205115	3	4	Down-regulated
Sus_scrofa___TNNT2	-5.02392	7.33053	36.6571	5.06565e-07	0.000294809	3	4	Down-regulated
Sus_scrofa___AUTS2	-1.69667	10.8198	36.6666	5.26147e-07	0.000294809	3	4	Down-regulated
Sus_scrofa___RIPOR2	-6.50184	4.38414	34.4691	6.34731e-07	0.000331788	3	4	Down-regulated
Sus_scrofa___RALGPS2	-2.48686	7.67273	35.091	8.00909e-07	0.000382922	3	4	Down-regulated
Sus_scrofa___DLG2	-3.72408	9.22465	34.426	9.48975e-07	0.000389151	3	4	Down-regulated
Sus_scrofa___LDLRAD3	-1.95757	7.73221	34.4381	9.51267e-07	0.000389151	3	4	Down-regulated
Sus_scrofa___GALNT17	-3.13618	7.07528	33.5166	1.21692e-06	0.000467348	3	4	Down-regulated
Sus_scrofa___THRB	-2.79288	7.45983	33.2115	1.28856e-06	0.000484963	3	4	Down-regulated
Sus_scrofa___EPHB1	-3.93033	5.83515	32.2954	1.45418e-06	0.000536562	3	4	Down-regulated
Sus_scrofa___CORIN	-5.44287	6.30552	32.3052	1.63195e-06	0.000590576	3	4	Down-regulated
Sus_scrofa___ENSSSCG00000038192	-4.92282	4.56354	29.3635	1.66675e-06	0.000591789	3	4	Down-regulated
Sus_scrofa___ENSSSCG00000017643	-2.24637	7.34549	31.7563	1.97573e-06	0.000663917	3	4	Down-regulated
Sus_scrofa___ADAMTSL3	-2.80628	7.5787	31.5153	2.10622e-06	0.00068336	3	4	Down-regulated
Sus_scrofa___DLGAP2	-3.7317	6.07887	30.8053	2.38421e-06	0.000735509	3	4	Down-regulated
Sus_scrofa___CPT1B	-7.25256	4.69756	29.3901	3.25313e-06	0.000958572	3	4	Down-regulated
Sus_scrofa___GPC3	-2.29412	8.25007	29.9457	3.2601e-06	0.000958572	3	4	Down-regulated
Sus_scrofa___OSR1	-3.12887	5.33284	28.4677	3.41426e-06	0.000988456	3	4	Down-regulated
Sus_scrofa___SNX2	-2.12861	6.5074	29.5283	3.72566e-06	0.00106131	3	4	Down-regulated
Sus_scrofa___SEMA6D	-2.26751	7.85551	29.4313	3.77872e-06	0.00106131	3	4	Down-regulated
Sus_scrofa___A2M	-3.43724	6.89723	29.3063	3.87349e-06	0.00107193	3	4	Down-regulated
Sus_scrofa___WRAP73	-2.25947	6.14634	29.0252	4.27186e-06	0.0011484	3	4	Down-regulated
Sus_scrofa___ADAM28	-3.59344	4.32733	26.142	4.73173e-06	0.00120327	3	4	Down-regulated
Sus_scrofa___DOCK6	-1.62806	7.08201	28.6358	4.79657e-06	0.00120349	3	4	Down-regulated
Sus_scrofa___COQ8A	-3.97933	4.97491	26.5626	5.25994e-06	0.00126953	3	4	Down-regulated
Sus_scrofa___FHL2	-3.79705	7.9688	28.0787	5.28929e-06	0.00126953	3	4	Down-regulated
Sus_scrofa___PAPLN	-2.36517	6.67647	28.1461	5.42672e-06	0.00126953	3	4	Down-regulated
Sus_scrofa___SYNPO2	-2.65828	9.56559	28.0586	5.60167e-06	0.00128552	3	4	Down-regulated
Sus_scrofa___CD4	-3.62823	6.33338	27.8144	5.95722e-06	0.00131886	3	4	Down-regulated
Sus_scrofa___ESRRG	-4.21328	6.15036	26.1769	7.87569e-06	0.00165839	3	4	Down-regulated
Sus_scrofa___KIAA1109	-1.5913	8.03617	26.91	7.89165e-06	0.00165839	3	4	Down-regulated
Sus_scrofa___PCP4	-6.16029	5.36337	26.5491	7.92997e-06	0.00165839	3	4	Down-regulated
Sus_scrofa___CYSLTR1	-2.34642	6.88957	26.7883	8.26924e-06	0.00171001	3	4	Down-regulated
Sus_scrofa___GLUL	-4.64052	5.23883	25.7016	8.62612e-06	0.00173789	3	4	Down-regulated
Sus_scrofa___SNRK	-2.11718	8.08572	26.5919	8.68116e-06	0.00173789	3	4	Down-regulated
Sus_scrofa___MTUS2	-3.17263	6.34536	25.9707	8.91967e-06	0.00176685	3	4	Down-regulated
Sus_scrofa___RXFP1	-6.78914	4.58994	25.592	9.68871e-06	0.00186043	3	4	Down-regulated
Sus_scrofa___DDX4	-2.25064	5.93568	26.0069	1.02591e-05	0.00193055	3	4	Down-regulated
Sus_scrofa___RNF150	-3.64666	6.39939	25.5349	1.04407e-05	0.00194528	3	4	Down-regulated
Sus_scrofa___TXLNB	-4.49049	5.49197	24.1339	1.21915e-05	0.00221305	3	4	Down-regulated
Sus_scrofa___CDC42EP1	-3.19147	5.21469	24.7959	1.22165e-05	0.00221305	3	4	Down-regulated
Sus_scrofa___GRIK4	-2.47149	8.56612	25.438	1.23483e-05	0.00221305	3	4	Down-regulated
Sus_scrofa___MRAS	-5.22766	4.859	24.1955	1.30371e-05	0.00230473	3	4	Down-regulated
Sus_scrofa___SAMSN1	-3.93154	4.68315	23.9149	1.31611e-05	0.00230473	3	4	Down-regulated
Sus_scrofa___KCP	-3.22929	5.69963	24.3685	1.34698e-05	0.00230473	3	4	Down-regulated
Sus_scrofa___ZNF385D	-2.18449	7.58681	25.1059	1.37341e-05	0.00232837	3	4	Down-regulated
Sus_scrofa___ART3	-5.16505	4.59623	23.2791	1.39297e-05	0.00234043	3	4	Down-regulated
Sus_scrofa___RORA	-1.39886	11.4914	24.6094	1.58805e-05	0.00258721	3	4	Down-regulated
Sus_scrofa___JAM3	-1.53454	8.42767	24.5978	1.59592e-05	0.00258721	3	4	Down-regulated
Sus_scrofa___FGF13	-3.85653	6.39342	24.9928	1.60502e-05	0.00258721	3	4	Down-regulated
Sus_scrofa___EPB41L3	-2.83102	6.52639	24.0942	1.61989e-05	0.00258721	3	4	Down-regulated
Sus_scrofa___KIF26B	-3.80145	7.41849	24.4146	1.62234e-05	0.00258721	3	4	Down-regulated
Sus_scrofa___ISYNA1	-2.18813	6.88908	24.5351	1.64227e-05	0.002597	3	4	Down-regulated
Sus_scrofa___CNTN4	-2.64336	5.93253	23.8302	1.91322e-05	0.00292707	3	4	Down-regulated
Sus_scrofa___EYA1	-2.88732	5.92113	23.8802	1.96357e-05	0.00293953	3	4	Down-regulated
Sus_scrofa___SLC4A11	-2.43513	6.11325	23.8807	1.96823e-05	0.00293953	3	4	Down-regulated
Sus_scrofa___RAB30	-2.55308	6.726	23.7565	2.07969e-05	0.00305747	3	4	Down-regulated
Sus_scrofa___ADA	-2.4171	5.42665	23.0708	2.1575e-05	0.0031272	3	4	Down-regulated
Sus_scrofa___ENPEP	-1.93881	8.79272	23.6321	2.16036e-05	0.0031272	3	4	Down-regulated
Sus_scrofa___SASH1	-1.30549	10.3402	23.5765	2.19694e-05	0.00315588	3	4	Down-regulated
Sus_scrofa___P2RY14	-1.91439	6.41422	23.4187	2.34001e-05	0.00328615	3	4	Down-regulated
Sus_scrofa___RFTN2	-1.69336	7.10706	23.3563	2.37843e-05	0.00330421	3	4	Down-regulated
Sus_scrofa___OSBPL11	-2.28859	5.66162	23.0937	2.50616e-05	0.00341933	3	4	Down-regulated
Sus_scrofa___ASPDH	-3.31615	7.67503	22.9199	2.56943e-05	0.00345368	3	4	Down-regulated
Sus_scrofa___MYOCD	-3.35016	6.93024	22.6	2.71858e-05	0.00360269	3	4	Down-regulated
Sus_scrofa___MYL7	-4.58426	4.8662	21.3839	2.80883e-05	0.00364447	3	4	Down-regulated
Sus_scrofa___RAP1GAP2	-3.84549	4.71459	22.115	2.81378e-05	0.00364447	3	4	Down-regulated
Sus_scrofa___BTBD11	-2.36227	6.88852	22.759	2.87368e-05	0.00367871	3	4	Down-regulated
Sus_scrofa___CADM1	-3.14828	5.21484	21.5107	3.11053e-05	0.00387642	3	4	Down-regulated
Sus_scrofa___ENSSSCG00000040109	-3.61743	6.65029	22.5713	3.37924e-05	0.00415624	3	4	Down-regulated
Sus_scrofa___PTDSS1	-5.12186	4.83757	21.3672	3.59785e-05	0.00432492	3	4	Down-regulated
Sus_scrofa___LAMA3	-3.18195	4.56172	20.245	3.61775e-05	0.00432492	3	4	Down-regulated
Sus_scrofa___ERBB4	-4.56587	5.04507	21.6722	3.63772e-05	0.00432492	3	4	Down-regulated
Sus_scrofa___ARHGAP6	-1.3243	9.95575	21.9946	3.65428e-05	0.00432492	3	4	Down-regulated
Sus_scrofa___ULK4	-1.56535	7.29444	21.9035	3.78975e-05	0.00442954	3	4	Down-regulated
Sus_scrofa___SLC9B2	-5.52023	5.31954	21.3177	3.82969e-05	0.00444859	3	4	Down-regulated
Sus_scrofa___ADGRD1	-1.82838	7.55809	21.6836	4.06294e-05	0.00469058	3	4	Down-regulated
Sus_scrofa___SGSM1	-2.70125	4.81401	20.8153	4.31207e-05	0.00489795	3	4	Down-regulated
Sus_scrofa___GABRB1	-4.90797	4.71823	20.6023	4.47439e-05	0.00504187	3	4	Down-regulated
Sus_scrofa___PDE3B	-3.53377	6.48277	20.9446	4.55436e-05	0.00510143	3	4	Down-regulated
Sus_scrofa___COLEC12	-2.09805	7.2614	21.2377	4.72082e-05	0.00516805	3	4	Down-regulated
Sus_scrofa___ABCA9	-2.69893	5.66298	21.0315	4.7237e-05	0.00516805	3	4	Down-regulated
Sus_scrofa___ENSSSCG00000036052	-3.62879	6.31597	21.4062	4.77205e-05	0.00519078	3	4	Down-regulated
Sus_scrofa___TSEN2	-2.18652	7.45055	21.1743	4.81461e-05	0.00520697	3	4	Down-regulated
Sus_scrofa___LDB2	-1.28806	10.4301	21.0247	5.02916e-05	0.00534151	3	4	Down-regulated
Sus_scrofa___ATP8A1	-3.0542	5.61653	20.5199	5.03235e-05	0.00534151	3	4	Down-regulated
Sus_scrofa___FAP	-1.77599	7.63241	21.0212	5.05255e-05	0.00534151	3	4	Down-regulated
Sus_scrofa___OLFML2B	-2.86881	5.73755	20.6673	5.24673e-05	0.00548517	3	4	Down-regulated
Sus_scrofa___ARHGAP29	-1.33184	9.03025	20.8465	5.33808e-05	0.00550932	3	4	Down-regulated
Sus_scrofa___MYH7B	-4.12982	5.66583	20.3433	5.34961e-05	0.00550932	3	4	Down-regulated
Sus_scrofa___YPEL3	-2.75604	4.98604	20.3457	5.35766e-05	0.00550932	3	4	Down-regulated
Sus_scrofa___GGA2	-4.64444	4.69576	20.0248	5.61864e-05	0.00571522	3	4	Down-regulated
Sus_scrofa___ADAMTSL1	-4.08189	5.11416	19.8366	5.82354e-05	0.00589179	3	4	Down-regulated
Sus_scrofa___PLXDC2	-1.18489	10.7846	20.5587	5.87548e-05	0.00591255	3	4	Down-regulated
Sus_scrofa___RND3	-3.33265	5.04049	19.9961	6.03422e-05	0.00600804	3	4	Down-regulated
Sus_scrofa___VSTM1	-4.72092	4.21833	20.6424	6.20262e-05	0.00614321	3	4	Down-regulated
Sus_scrofa___EGFLAM	-1.64732	11.0149	20.3643	6.27214e-05	0.00617953	3	4	Down-regulated
Sus_scrofa___PCSK6	-2.79001	5.94799	20.1095	6.37256e-05	0.00624577	3	4	Down-regulated
Sus_scrofa___TTC21B	-1.50359	7.0715	20.2691	6.52044e-05	0.00634775	3	4	Down-regulated
Sus_scrofa___TNFRSF21	-1.90521	9.71061	20.2388	6.54408e-05	0.00634775	3	4	Down-regulated
Sus_scrofa___ENSSSCG00000048674	-4.00381	4.27968	19.3948	6.66689e-05	0.00643372	3	4	Down-regulated
Sus_scrofa___SOX13	-1.71666	8.03278	20.0154	7.07438e-05	0.00665651	3	4	Down-regulated
Sus_scrofa___LRP5	-2.94184	6.01138	19.8811	7.12336e-05	0.00665651	3	4	Down-regulated
Sus_scrofa___NCEH1	-3.15457	5.54311	20.0451	7.17523e-05	0.00665651	3	4	Down-regulated
Sus_scrofa___SLC16A7	-3.04986	6.263	19.6256	7.20203e-05	0.00665651	3	4	Down-regulated
Sus_scrofa___CASZ1	-6.48195	4.40049	19.3736	7.27069e-05	0.00665651	3	4	Down-regulated
Sus_scrofa___NTN5	-2.76612	5.42443	19.7448	7.27871e-05	0.00665651	3	4	Down-regulated
Sus_scrofa___SPTB	-4.90462	4.68285	19.4219	7.70015e-05	0.00692637	3	4	Down-regulated
Sus_scrofa___KCNIP2	-5.91537	4.28458	19.0581	7.73399e-05	0.00692637	3	4	Down-regulated
Sus_scrofa___PTPRT	-2.55298	7.06689	19.6299	7.75069e-05	0.00692637	3	4	Down-regulated
Sus_scrofa___ENSSSCG00000027921	-5.70151	3.94253	18.3783	7.77078e-05	0.00692637	3	4	Down-regulated
Sus_scrofa___MYOF	-1.77203	8.38464	19.7234	7.80312e-05	0.00692637	3	4	Down-regulated
Sus_scrofa___LGR4	-3.51481	5.64919	19.2706	8.02728e-05	0.00700275	3	4	Down-regulated
Sus_scrofa___ENSSSCG00000031608	-4.31469	5.13925	19.2768	8.04136e-05	0.00700275	3	4	Down-regulated
Sus_scrofa___NRIP2	-2.91176	4.85903	18.6243	8.14896e-05	0.00703427	3	4	Down-regulated
Sus_scrofa___RYR2	-2.66477	10.614	19.5762	8.19991e-05	0.00704289	3	4	Down-regulated
Sus_scrofa___ENSSSCG00000042498	-3.87531	4.68493	18.7452	8.28895e-05	0.00705798	3	4	Down-regulated
Sus_scrofa___EFCC1	-3.49705	4.18352	18.0621	8.38883e-05	0.00710497	3	4	Down-regulated
Sus_scrofa___LRRC36	-4.76948	4.47343	18.6375	8.44279e-05	0.00710497	3	4	Down-regulated
Sus_scrofa___WNK2	-3.6373	5.34445	18.9902	8.45841e-05	0.00710497	3	4	Down-regulated
Sus_scrofa___ENSSSCG00000033497	-1.31215	8.96513	19.3793	8.76913e-05	0.00726949	3	4	Down-regulated
Sus_scrofa___HSPG2	-1.53377	7.97838	19.0935	9.69355e-05	0.00782889	3	4	Down-regulated
Sus_scrofa___PACSIN2	-1.48717	9.23267	19.0171	9.93269e-05	0.00798775	3	4	Down-regulated
Sus_scrofa___SNX24	-2.17499	6.34182	18.8211	0.000107409	0.0085284	3	4	Down-regulated
Sus_scrofa___MPPE1	-3.60078	4.55803	17.776	0.000112744	0.00884009	3	4	Down-regulated
Sus_scrofa___GRK3	-1.98367	6.92505	18.626	0.000114694	0.00891862	3	4	Down-regulated
Sus_scrofa___RNF207	-6.53874	4.18895	18.2173	0.000115381	0.00893518	3	4	Down-regulated
Sus_scrofa___BCAS3	-1.22126	10.4729	18.5589	0.000116427	0.00897919	3	4	Down-regulated
Sus_scrofa___CCDC69	-4.68827	4.48487	17.773	0.000125304	0.00954646	3	4	Down-regulated
Sus_scrofa___SLC66A2	-3.4606	5.27082	17.8489	0.000127489	0.00966761	3	4	Down-regulated
Sus_scrofa___SRL	-3.49672	5.01249	17.9801	0.000128436	0.00966761	3	4	Down-regulated
Sus_scrofa___KCNQ3	-3.86111	5.67953	17.9327	0.000130361	0.00971535	3	4	Down-regulated
Sus_scrofa___ZDHHC14	-2.17689	5.65765	17.7724	0.000130619	0.00971535	3	4	Down-regulated
Sus_scrofa___NCOA2	-1.13705	8.93763	18.208	0.000131681	0.00975582	3	4	Down-regulated
Sus_scrofa___ZNF804B	-4.97213	5.70567	17.7732	0.00014074	0.0101863	3	4	Down-regulated
Sus_scrofa___GADD45G	-4.79318	4.6767	16.9609	0.000143615	0.0103151	3	4	Down-regulated
Sus_scrofa___LCP1	-5.09344	3.95223	17.061	0.000149539	0.010619	3	4	Down-regulated
Sus_scrofa___DDAH2	-2.21849	4.93916	17.3987	0.00015699	0.0110343	3	4	Down-regulated
Sus_scrofa___KCNJ3	-3.77878	6.07224	17.8679	0.000157069	0.0110343	3	4	Down-regulated
Sus_scrofa___FBXO9	-2.19789	5.25311	17.5216	0.000159073	0.011128	3	4	Down-regulated
Sus_scrofa___ENSSSCG00000000359	-3.55361	4.79066	17.0246	0.000162993	0.0112765	3	4	Down-regulated
Sus_scrofa___MYOM1	-3.24908	6.72018	17.3851	0.000163936	0.0112915	3	4	Down-regulated
Sus_scrofa___ATP1A2	-2.37446	7.27561	17.5912	0.000164941	0.0112915	3	4	Down-regulated
Sus_scrofa___MYLK3	-3.70806	4.98447	17.1976	0.00016501	0.0112915	3	4	Down-regulated
Sus_scrofa___RBFOX1	-3.38068	6.02121	17.2527	0.000165932	0.0113001	3	4	Down-regulated
Sus_scrofa___CACNB4	-2.61001	5.14174	17.1607	0.000172902	0.0116512	3	4	Down-regulated
Sus_scrofa___ANKRD39	-3.46628	5.41135	17.075	0.000174713	0.0116587	3	4	Down-regulated
Sus_scrofa___CDK9	-1.82367	6.69455	17.382	0.000177801	0.0118198	3	4	Down-regulated
Sus_scrofa___HERC1	-1.4239	8.06965	17.354	0.000178383	0.0118198	3	4	Down-regulated
Sus_scrofa___HNRNPA2B1	-1.18082	8.83823	17.2682	0.000183789	0.0120448	3	4	Down-regulated
Sus_scrofa___MYL3	-3.17696	5.61735	16.779	0.000183868	0.0120448	3	4	Down-regulated
Sus_scrofa___TMEM164	-2.88084	6.93538	16.9881	0.000185891	0.0120448	3	4	Down-regulated
Sus_scrofa___MYL2	-4.06229	7.05602	17.1374	0.00018626	0.0120448	3	4	Down-regulated
Sus_scrofa___SLC44A5	-3.69004	5.71559	17.0205	0.000188008	0.0121162	3	4	Down-regulated
Sus_scrofa___IL10RA	-5.18305	3.74881	16.4226	0.000188802	0.0121258	3	4	Down-regulated
Sus_scrofa___BCL11A	-5.48684	3.92164	16.4591	0.000189789	0.0121478	3	4	Down-regulated
Sus_scrofa___TECRL	-3.49337	6.51044	17.3602	0.000190523	0.0121534	3	4	Down-regulated
Sus_scrofa___LUC7L3	-1.16124	8.99667	17.1403	0.000192406	0.0122321	3	4	Down-regulated
Sus_scrofa___PPP1R14C	-4.56051	4.28472	16.1232	0.000194272	0.0122845	3	4	Down-regulated
Sus_scrofa___PLS1	-4.27477	4.29832	16.29	0.000197719	0.0123077	3	4	Down-regulated
Sus_scrofa___SNTB1	-1.14922	9.02603	17.058	0.000198174	0.0123077	3	4	Down-regulated
Sus_scrofa___GUCY1B1	-1.18495	9.94268	16.9758	0.000204091	0.0126335	3	4	Down-regulated
Sus_scrofa___CDH8	-4.31757	4.10821	15.946	0.000208424	0.0128594	3	4	Down-regulated
Sus_scrofa___PLEKHM3	-3.39595	5.297	16.5924	0.000216353	0.0131758	3	4	Down-regulated
Sus_scrofa___PCDH19	-1.90669	7.51295	16.7366	0.00022328	0.013512	3	4	Down-regulated
Sus_scrofa___RAI2	-5.90041	4.03023	16.3751	0.000223824	0.013512	3	4	Down-regulated
Sus_scrofa___CCDC167	-2.77378	5.04298	16.0274	0.000225121	0.0135346	3	4	Down-regulated
Sus_scrofa___CXCL12	-2.6327	5.12692	16.3116	0.00023029	0.0137139	3	4	Down-regulated
Sus_scrofa___PPP1R9A	-3.43428	5.2869	16.1175	0.00023464	0.0138477	3	4	Down-regulated
Sus_scrofa___ENSSSCG00000032029	-3.82092	4.52708	15.6899	0.000234711	0.0138477	3	4	Down-regulated
Sus_scrofa___GAB1	-1.46214	8.3309	16.5912	0.000234744	0.0138477	3	4	Down-regulated
Sus_scrofa___ARHGAP15	-2.32152	5.68114	16.3871	0.000239743	0.0140984	3	4	Down-regulated
Sus_scrofa___LRRC4C	-1.67691	6.47814	16.364	0.00025696	0.0149705	3	4	Down-regulated
Sus_scrofa___SAT1	-1.47176	8.25384	16.2977	0.00026132	0.0151308	3	4	Down-regulated
Sus_scrofa___SLIT2	-1.86597	7.72556	16.2671	0.00026476	0.0152363	3	4	Down-regulated
Sus_scrofa___ENSSSCG00000035617	-5.69797	4.36782	15.571	0.000269957	0.015488	3	4	Down-regulated
Sus_scrofa___CLSTN2	-2.17812	5.21386	15.9055	0.000272578	0.0155908	3	4	Down-regulated
Sus_scrofa___ENSSSCG00000021374	-4.28747	4.06134	15.1862	0.000275634	0.0157178	3	4	Down-regulated
Sus_scrofa___KCNH2	-5.6424	3.80243	15.7811	0.000276524	0.0157209	3	4	Down-regulated
Sus_scrofa___TLN2	-1.93723	6.97188	16.0996	0.000281505	0.0157601	3	4	Down-regulated
Sus_scrofa___ARHGAP10	-1.31591	11.1952	16.0904	0.000281638	0.0157601	3	4	Down-regulated
Sus_scrofa___CCDC141	-2.32397	7.42348	16.0996	0.000281693	0.0157601	3	4	Down-regulated
Sus_scrofa___TMPO	-2.86082	4.42778	15.2629	0.00028351	0.0157601	3	4	Down-regulated
Sus_scrofa___ENSSSCG00000004598	-3.75552	5.00698	15.8155	0.000284516	0.0157601	3	4	Down-regulated
Sus_scrofa___NCALD	-1.37945	10.1781	16.0621	0.000284609	0.0157601	3	4	Down-regulated
Sus_scrofa___NTF3	-1.49782	7.65223	16.0467	0.000287047	0.0157943	3	4	Down-regulated
Sus_scrofa___CCDC85A	-2.52166	6.23191	15.9888	0.000289597	0.0158881	3	4	Down-regulated
Sus_scrofa___STRIP2	-5.47408	3.8954	15.3699	0.000295014	0.016045	3	4	Down-regulated
Sus_scrofa___TMTC1	-1.59057	7.55074	15.9515	0.000297145	0.0161144	3	4	Down-regulated
Sus_scrofa___ENSSSCG00000011121	-1.31881	8.54626	15.9113	0.000301069	0.0162242	3	4	Down-regulated
Sus_scrofa___MYH7	-3.05743	7.8347	15.9085	0.000301288	0.0162242	3	4	Down-regulated
Sus_scrofa___IFN-ALPHA-8	-4.96991	3.86686	15.1752	0.000306167	0.0163214	3	4	Down-regulated
Sus_scrofa___ENSSSCG00000032984	-1.86427	5.92039	15.791	0.000313669	0.0165804	3	4	Down-regulated
Sus_scrofa___FRRS1L	-2.94862	5.18212	15.1819	0.000317006	0.0167098	3	4	Down-regulated
Sus_scrofa___LMO7	-2.95827	6.39195	15.5932	0.000328393	0.0172617	3	4	Down-regulated
Sus_scrofa___LRFN5	-1.96889	6.62831	15.5831	0.000337555	0.0176939	3	4	Down-regulated
Sus_scrofa___FRMD4B	-2.15053	6.52047	15.5813	0.000342507	0.0177827	3	4	Down-regulated
Sus_scrofa___PRDM11	-1.95999	6.04073	15.5691	0.000343337	0.0177827	3	4	Down-regulated
Sus_scrofa___LIMS2	-3.80718	5.66049	15.1733	0.000344188	0.0177827	3	4	Down-regulated
Sus_scrofa___SPECC1	-1.88192	6.94514	15.529	0.000348669	0.0179269	3	4	Down-regulated
Sus_scrofa___FAM124A	-4.31057	4.27907	14.8172	0.000371569	0.0187458	3	4	Down-regulated
Sus_scrofa___TNNC1	-3.37036	5.77629	14.993	0.000373249	0.0187802	3	4	Down-regulated
Sus_scrofa___ENSSSCG00000007944	-1.69982	6.34505	15.2984	0.000380856	0.0190105	3	4	Down-regulated
Sus_scrofa___CEP85	-3.63147	4.5923	14.6564	0.000385232	0.0191274	3	4	Down-regulated
Sus_scrofa___DAZAP1	-1.54011	7.00282	15.2104	0.000392214	0.0192826	3	4	Down-regulated
Sus_scrofa___WDR11	-1.90907	6.23019	15.2127	0.00039236	0.0192826	3	4	Down-regulated
Sus_scrofa___RBM47	-2.70989	4.50581	14.5748	0.000394778	0.0193462	3	4	Down-regulated
Sus_scrofa___ESRRB	-3.82915	4.52888	14.4457	0.000407982	0.0197457	3	4	Down-regulated
Sus_scrofa___PDE4DIP	-2.5885	7.44437	14.8947	0.000408177	0.0197457	3	4	Down-regulated
Sus_scrofa___ARHGEF6	-2.09827	6.65451	15.1008	0.00040961	0.0197642	3	4	Down-regulated
Sus_scrofa___ASB4	-3.5815	5.13218	14.9438	0.000414632	0.0199553	3	4	Down-regulated
Sus_scrofa___SEMA3C	-3.27078	5.55288	14.8671	0.000416202	0.0199798	3	4	Down-regulated
Sus_scrofa___PLA2G7	-3.97506	4.88738	14.6956	0.000425519	0.0202149	3	4	Down-regulated
Sus_scrofa___ZC3H8	-2.0577	5.48547	14.9139	0.000427456	0.0202149	3	4	Down-regulated
Sus_scrofa___COX4I2	-1.8753	6.40173	14.9888	0.000427993	0.0202149	3	4	Down-regulated
Sus_scrofa___ENSSSCG00000024161	-5.02126	3.93925	14.2647	0.000428618	0.0202149	3	4	Down-regulated
Sus_scrofa___PDE4D	-2.10218	10.2034	14.8763	0.0004428	0.0205743	3	4	Down-regulated
Sus_scrofa___HMCN2	-3.52717	4.51883	14.3491	0.000447814	0.0206815	3	4	Down-regulated
Sus_scrofa___MYOM3	-3.10621	4.36743	13.9607	0.000450848	0.0206928	3	4	Down-regulated
Sus_scrofa___LNPEP	-2.18607	5.42765	14.6332	0.000462247	0.0211184	3	4	Down-regulated
Sus_scrofa___DOCK3	-2.9834	5.40329	14.5928	0.000462364	0.0211184	3	4	Down-regulated
Sus_scrofa___MACROD1	-3.75906	4.23328	13.9182	0.00047437	0.0215621	3	4	Down-regulated
Sus_scrofa___ASPN	-1.94554	6.44242	14.6822	0.000477695	0.0216088	3	4	Down-regulated
Sus_scrofa___PFKM	-5.13154	3.79068	14.103	0.0004834	0.0218144	3	4	Down-regulated
Sus_scrofa___TPCN1	-1.81143	6.02619	14.6006	0.000494016	0.0222078	3	4	Down-regulated
Sus_scrofa___GLI2	-1.2575	7.85479	14.535	0.000504322	0.0224842	3	4	Down-regulated
Sus_scrofa___MAP7	-4.54012	4.42397	14.0687	0.000505154	0.0224842	3	4	Down-regulated
Sus_scrofa___SLITRK6	-5.34154	3.61442	15.2887	0.000506377	0.0224842	3	4	Down-regulated
Sus_scrofa___CKM	-2.67594	4.94459	13.8029	0.000506606	0.0224842	3	4	Down-regulated
Sus_scrofa___NEB	-5.46491	3.85824	13.8829	0.000517889	0.0229309	3	4	Down-regulated
Sus_scrofa___CYSLTR2	-1.45774	7.07501	14.462	0.000520474	0.0229913	3	4	Down-regulated
Sus_scrofa___NOTCH2	-1.1699	8.87614	14.4309	0.00052423	0.0231029	3	4	Down-regulated
Sus_scrofa___DPP4	-4.01526	5.43871	14.3565	0.000526947	0.0231502	3	4	Down-regulated
Sus_scrofa___ENSSSCG00000030991	-4.02428	4.65305	13.7286	0.000527762	0.0231502	3	4	Down-regulated
Sus_scrofa___MSC	-2.48361	4.38722	13.6673	0.000533644	0.0233538	3	4	Down-regulated
Sus_scrofa___GRAMD4	-3.25778	4.66861	13.8881	0.000538626	0.0235171	3	4	Down-regulated
Sus_scrofa___PDE1A	-1.12055	10.0516	14.327	0.000545257	0.0235877	3	4	Down-regulated
Sus_scrofa___ITGB6	-3.581	5.00393	13.8038	0.000558242	0.0240389	3	4	Down-regulated
Sus_scrofa___ENSSSCG00000033414	-3.37703	4.53792	13.5208	0.000560554	0.0240834	3	4	Down-regulated
Sus_scrofa___DPF3	-3.27025	4.89794	13.8467	0.000564894	0.024147	3	4	Down-regulated
Sus_scrofa___FAM180A	-3.79434	3.98038	13.5159	0.000565885	0.024147	3	4	Down-regulated
Sus_scrofa___DBP	-5.19754	3.6536	13.9447	0.000578671	0.0245811	3	4	Down-regulated
Sus_scrofa___NQO2	-1.96456	5.26975	14.0657	0.000584645	0.024779	3	4	Down-regulated
Sus_scrofa___TMEM86A	-2.37024	4.88316	13.8151	0.000589428	0.0248315	3	4	Down-regulated
Sus_scrofa___WDR91	-1.94062	5.34981	13.9538	0.000591164	0.0248315	3	4	Down-regulated
Sus_scrofa___GNAO1	-5.05221	3.96774	13.5114	0.000597082	0.0249991	3	4	Down-regulated
Sus_scrofa___MCF2L	-3.63679	3.87647	13.2991	0.000597811	0.0249991	3	4	Down-regulated
Sus_scrofa___ANK1	-6.01439	4.43586	13.7326	0.000609355	0.0253131	3	4	Down-regulated
Sus_scrofa___MBP	-3.31966	5.63129	13.9017	0.000613728	0.0254386	3	4	Down-regulated
Sus_scrofa___FRMD3	-1.19546	11.2302	14.0023	0.000617543	0.0255405	3	4	Down-regulated
Sus_scrofa___EBI3	-1.67148	5.54014	13.9208	0.000623649	0.0256801	3	4	Down-regulated
Sus_scrofa___MYH14	-3.6496	4.10478	13.3735	0.000626803	0.0257537	3	4	Down-regulated
Sus_scrofa___GRIA1	-3.04813	4.5498	13.5867	0.000638609	0.0260959	3	4	Down-regulated
Sus_scrofa___SPINT2	-2.41198	4.5124	13.314	0.000648825	0.0263138	3	4	Down-regulated
Sus_scrofa___RXRG	-5.63016	3.79122	13.8362	0.000657626	0.0265562	3	4	Down-regulated
Sus_scrofa___CORO2B	-1.40049	6.69145	13.8294	0.000663527	0.0267074	3	4	Down-regulated
Sus_scrofa___ATP5ME	-3.20215	4.72567	13.2933	0.000664208	0.0267074	3	4	Down-regulated
Sus_scrofa___PTPN4	-3.11591	6.30275	13.8089	0.00066722	0.0267297	3	4	Down-regulated
Sus_scrofa___ADGRV1	-1.30509	9.23523	13.7943	0.000669302	0.0267297	3	4	Down-regulated
Sus_scrofa___CAMK2A	-2.74523	5.67599	13.649	0.000669491	0.0267297	3	4	Down-regulated
Sus_scrofa___ITGB1BP2	-3.98123	4.10167	13.129	0.000676161	0.0268972	3	4	Down-regulated
Sus_scrofa___ZFYVE16	-1.12394	7.45941	13.7676	0.000677503	0.0268972	3	4	Down-regulated
Sus_scrofa___OBSCN	-3.20809	6.09853	13.8816	0.000684446	0.0270592	3	4	Down-regulated
Sus_scrofa___ENSSSCG00000005916	-3.09528	4.79851	13.4499	0.000684461	0.0270592	3	4	Down-regulated
Sus_scrofa___GAS6	-3.60904	4.2147	13.0182	0.000689848	0.0270723	3	4	Down-regulated
Sus_scrofa___SLCO1C1	-4.94126	3.66575	13.1539	0.000690484	0.0270723	3	4	Down-regulated
Sus_scrofa___NPNT	-4.12757	4.11395	12.9805	0.000691396	0.0270723	3	4	Down-regulated
Sus_scrofa___INPP5B	-1.36338	6.97069	13.7196	0.000691984	0.0270723	3	4	Down-regulated
Sus_scrofa___ACSF2	-1.62135	6.13852	13.7016	0.000698691	0.0272306	3	4	Down-regulated
Sus_scrofa___RRAD	-2.86103	5.4657	13.7545	0.000698927	0.0272306	3	4	Down-regulated
Sus_scrofa___TMSB4X	-1.5101	6.83014	13.6763	0.000704179	0.0273281	3	4	Down-regulated
Sus_scrofa___SRC	-2.73033	4.88883	13.3471	0.000727935	0.0280703	3	4	Down-regulated
Sus_scrofa___SP4	-1.86457	5.37166	13.5191	0.00073502	0.0281703	3	4	Down-regulated
Sus_scrofa___HIGD1B	-1.52932	8.54693	13.5233	0.000743728	0.0284357	3	4	Down-regulated
Sus_scrofa___ADORA2A	-1.48928	5.70906	13.3595	0.000745205	0.0284357	3	4	Down-regulated
Sus_scrofa___SCARB1	-1.73124	6.88944	13.5245	0.000746478	0.0284357	3	4	Down-regulated
Sus_scrofa___TPM2	-2.66918	6.64732	13.3321	0.000760499	0.028853	3	4	Down-regulated
Sus_scrofa___TNS3	-1.78463	6.53509	13.4504	0.00076725	0.0290123	3	4	Down-regulated
Sus_scrofa___SPOCK2	-3.12306	4.14282	12.8368	0.000767783	0.0290123	3	4	Down-regulated
Sus_scrofa___ZFPM2	-1.05305	11.1071	13.4338	0.000769787	0.0290298	3	4	Down-regulated
Sus_scrofa___LPCAT4	-3.92289	4.72347	13.2061	0.000775709	0.0290914	3	4	Down-regulated
Sus_scrofa___PRKAA2	-2.95106	5.45117	13.1462	0.000778491	0.0290914	3	4	Down-regulated
Sus_scrofa___DIS3L2	-1.04761	8.01237	13.4052	0.000779151	0.0290914	3	4	Down-regulated
Sus_scrofa___C3orf62	-2.65966	5.06037	13.2059	0.000781726	0.0291297	3	4	Down-regulated
Sus_scrofa___SOX6	-2.22261	7.40655	13.3474	0.000791291	0.0294279	3	4	Down-regulated
Sus_scrofa___DEPTOR	-1.33222	6.88178	13.3656	0.000794338	0.0294829	3	4	Down-regulated
Sus_scrofa___DNAJC6	-1.62947	6.52161	13.3235	0.000809017	0.0296766	3	4	Down-regulated
Sus_scrofa___ENSSSCG00000049158	-1.8565	6.4906	13.231	0.000836389	0.0304433	3	4	Down-regulated
Sus_scrofa___MPP7	-2.16414	6.41595	13.3384	0.00084738	0.0306654	3	4	Down-regulated
Sus_scrofa___DPP8	-1.13731	7.79598	13.1684	0.000855049	0.0308244	3	4	Down-regulated
Sus_scrofa___FOXN3	-1.03463	9.31604	13.1006	0.000877237	0.0314435	3	4	Down-regulated
Sus_scrofa___STRADB	-2.73538	5.43684	12.9069	0.000882709	0.0315196	3	4	Down-regulated
Sus_scrofa___PLCE1	-1.35111	8.6013	13.0452	0.000896739	0.0319599	3	4	Down-regulated
Sus_scrofa___GFM1	-2.94522	5.49952	12.9559	0.000899682	0.0320042	3	4	Down-regulated
Sus_scrofa___SEPTIN7	-0.958953	9.40697	13.021	0.00090514	0.0320566	3	4	Down-regulated
Sus_scrofa___EEPD1	-2.52419	4.94233	12.7583	0.000907069	0.0320566	3	4	Down-regulated
Sus_scrofa___HMCN1	-1.75357	7.58468	13.0124	0.000911618	0.0321127	3	4	Down-regulated
Sus_scrofa___NGF	-1.29326	8.50535	13.0006	0.000912972	0.0321127	3	4	Down-regulated
Sus_scrofa___SCN5A	-3.10354	4.9365	12.8323	0.000918687	0.0322409	3	4	Down-regulated
Sus_scrofa___TFEB	-2.34472	5.1824	12.7548	0.000954214	0.0333143	3	4	Down-regulated
Sus_scrofa___ARGLU1	-1.01398	9.04458	12.8024	0.00098685	0.0341433	3	4	Down-regulated
Sus_scrofa___PDE6A	-2.25259	6.40178	12.8054	0.000990723	0.0341455	3	4	Down-regulated
Sus_scrofa___ENSSSCG00000015632	-2.74599	4.3856	12.264	0.00101773	0.0346952	3	4	Down-regulated
Sus_scrofa___CCDC82	-1.48351	5.80025	12.7097	0.00102563	0.0347972	3	4	Down-regulated
Sus_scrofa___DTX4	-2.36039	6.37948	12.7014	0.00102628	0.0347972	3	4	Down-regulated
Sus_scrofa___SLC41A1	-3.5781	4.59258	12.3629	0.00104534	0.0352529	3	4	Down-regulated
Sus_scrofa___ADCY5	-2.39989	7.54925	12.6318	0.00105332	0.0354587	3	4	Down-regulated
Sus_scrofa___AJUBA	-1.86936	6.28444	12.5682	0.00108496	0.0362493	3	4	Down-regulated
Sus_scrofa___RPLP2	-3.194	5.29515	12.3872	0.00110387	0.0367006	3	4	Down-regulated
Sus_scrofa___UNKL	-1.18966	7.36064	12.4779	0.00112514	0.0372398	3	4	Down-regulated
Sus_scrofa___ENSSSCG00000000905	-4.79792	3.90255	12.0719	0.00112741	0.0372398	3	4	Down-regulated
Sus_scrofa___TRIM55	-3.07673	5.4956	12.443	0.0011511	0.0378035	3	4	Down-regulated
Sus_scrofa___SLC4A3	-3.39317	4.21845	11.9395	0.00116618	0.0380982	3	4	Down-regulated
Sus_scrofa___ARHGAP24	-1.175	10.6158	12.3785	0.00116817	0.0380982	3	4	Down-regulated
Sus_scrofa___SPRY1	-1.03554	9.86088	12.334	0.00118922	0.0385631	3	4	Down-regulated
Sus_scrofa___LRRC39	-4.97309	3.74189	11.9373	0.00119062	0.0385631	3	4	Down-regulated
Sus_scrofa___CDK18	-5.32524	3.67745	12.1017	0.00120884	0.0388239	3	4	Down-regulated
Sus_scrofa___RPS6KA5	-1.67152	6.95194	12.302	0.00120899	0.0388239	3	4	Down-regulated
Sus_scrofa___COL6A6	-3.01632	4.41092	11.8287	0.00121866	0.0389609	3	4	Down-regulated
Sus_scrofa___AKNA	-1.47363	5.91671	12.2657	0.00121909	0.0389609	3	4	Down-regulated
Sus_scrofa___GJA1	-5.28716	4.16041	12.2377	0.00121947	0.0389609	3	4	Down-regulated
Sus_scrofa___TRPC3	-1.79645	6.05692	12.1989	0.00125224	0.0395381	3	4	Down-regulated
Sus_scrofa___PKP2	-2.72511	5.46938	12.2369	0.00126322	0.0398179	3	4	Down-regulated
Sus_scrofa___MTUS1	-1.81422	6.74874	12.1893	0.00126537	0.0398188	3	4	Down-regulated
Sus_scrofa___SRPX	-1.76962	5.0817	11.9637	0.00126845	0.0398491	3	4	Down-regulated
Sus_scrofa___FHAD1	-2.69105	4.93684	11.8693	0.00130976	0.0404182	3	4	Down-regulated
Sus_scrofa___EEF2K	-2.66015	4.9118	11.8175	0.00131019	0.0404182	3	4	Down-regulated
Sus_scrofa___TCF15	-2.0128	5.60349	12.0159	0.00132519	0.0407474	3	4	Down-regulated
Sus_scrofa___ENSSSCG00000039476	-1.33116	7.29834	12.0364	0.00134406	0.0412601	3	4	Down-regulated
Sus_scrofa___MYBPC3	-2.29976	8.07866	11.965	0.00135178	0.0414297	3	4	Down-regulated
Sus_scrofa___CHCHD10	-3.01299	4.57964	11.6223	0.00135968	0.0414746	3	4	Down-regulated
Sus_scrofa___DISC1	-1.1932	7.64967	12.0048	0.00135986	0.0414746	3	4	Down-regulated
Sus_scrofa___MCC	-1.40769	7.1846	11.9874	0.00137111	0.0416825	3	4	Down-regulated
Sus_scrofa___KCND3	-3.12813	4.5195	11.6969	0.00137683	0.0417889	3	4	Down-regulated
Sus_scrofa___GPS1	-1.89824	4.90549	11.7878	0.00138608	0.0418821	3	4	Down-regulated
Sus_scrofa___ENSSSCG00000027790	-1.73762	5.30255	11.8533	0.00138657	0.0418821	3	4	Down-regulated
Sus_scrofa___SEMA3G	-4.84721	3.63525	11.4734	0.00138963	0.0419071	3	4	Down-regulated
Sus_scrofa___TBX19	-4.50342	4.12326	11.5486	0.00139226	0.0419193	3	4	Down-regulated
Sus_scrofa___CKMT2	-3.91459	4.52136	11.673	0.00139556	0.0419517	3	4	Down-regulated
Sus_scrofa___ACSS2	-2.83165	5.43372	11.8281	0.00140401	0.0421383	3	4	Down-regulated
Sus_scrofa___LRRC55	-3.53256	3.98014	11.4402	0.00140874	0.0421939	3	4	Down-regulated
Papio_anubis_TTN	-5.62475	3.81247	11.9466	0.00142048	0.0423623	3	4	Down-regulated
Sus_scrofa___KCNAB1	-1.26969	10.3145	11.8855	0.00142482	0.0424243	3	4	Down-regulated
Sus_scrofa___ZFAND5	-2.45382	6.3042	11.8623	0.00143449	0.0425066	3	4	Down-regulated
Sus_scrofa___CYRIA	-2.687	5.48461	11.7978	0.00144022	0.0425066	3	4	Down-regulated
Sus_scrofa___SUSD4	-1.48863	8.13449	11.8337	0.00145622	0.0426769	3	4	Down-regulated
Sus_scrofa___SRRM2	-1.07102	9.24307	11.7819	0.00148619	0.0434271	3	4	Down-regulated
Sus_scrofa___RB1CC1	-1.23869	7.36799	11.7365	0.00151664	0.0441116	3	4	Down-regulated
Sus_scrofa___FHOD3	-2.19884	8.37789	11.6691	0.00152041	0.0441529	3	4	Down-regulated
Sus_scrofa___ENSSSCG00000009327	-1.23538	6.99527	11.6692	0.00156018	0.044961	3	4	Down-regulated
Sus_scrofa___ENSSSCG00000016810	-2.03069	6.84796	11.6347	0.00158421	0.045514	3	4	Down-regulated
Sus_scrofa___NDUFA4	-2.87293	5.32893	11.2664	0.00162364	0.0463638	3	4	Down-regulated
Sus_scrofa___SCARF1	-3.72568	3.99811	11.0108	0.00164209	0.0467486	3	4	Down-regulated
Sus_scrofa___ATP1A1	-2.18037	6.32505	11.5093	0.00164549	0.0467747	3	4	Down-regulated
Sus_scrofa___ENSSSCG00000038455	-3.25335	6.08282	11.6224	0.00165194	0.0468365	3	4	Down-regulated
Sus_scrofa___CEP131	-3.60226	3.92213	11.0758	0.00166253	0.0470458	3	4	Down-regulated
Sus_scrofa___TRIM63	-3.73449	4.49396	11.2338	0.00167008	0.0471269	3	4	Down-regulated
Sus_scrofa___CDK14	-0.934063	9.99783	11.4563	0.00169727	0.0477416	3	4	Down-regulated
Sus_scrofa___CACNB2	-1.0716	11.7447	11.4359	0.00171142	0.0479623	3	4	Down-regulated
Sus_scrofa___NEBL	-2.48619	9.26993	11.4362	0.00171276	0.0479623	3	4	Down-regulated
Sus_scrofa___LAMA4	-0.974403	9.33796	11.4175	0.00172461	0.0481341	3	4	Down-regulated
Sus_scrofa___SLC37A1	-1.73654	5.23796	11.2539	0.001732	0.0482142	3	4	Down-regulated
Sus_scrofa___PER2	-1.86161	5.74398	11.2932	0.00173796	0.048247	3	4	Down-regulated
Sus_scrofa___GPX4	-2.824	4.89848	11.2466	0.00174087	0.048247	3	4	Down-regulated
Sus_scrofa___FIG4	-1.13618	7.3744	11.3579	0.00177035	0.048839	3	4	Down-regulated
Sus_scrofa___BTBD8	-2.44063	4.69659	11.071	0.00177393	0.048839	3	4	Down-regulated
Sus_scrofa___SLC9A3R2	-1.69552	5.9605	11.2846	0.00177778	0.048839	3	4	Down-regulated
Sus_scrofa___EPHX1	-2.69886	4.21187	10.9007	0.00177925	0.048839	3	4	Down-regulated
Sus_scrofa___PTPRD	-2.26629	5.24207	11.203	0.00178065	0.048839	3	4	Down-regulated
Sus_scrofa___RADIL	-1.4364	6.82927	11.3441	0.00178319	0.048839	3	4	Down-regulated
Sus_scrofa___LRFN2	-3.10589	4.06613	11.1719	0.00179284	0.0489662	3	4	Down-regulated
Sus_scrofa___NMRK2	-4.77812	3.6495	11.0498	0.00180432	0.0492083	3	4	Down-regulated

## Sheet: Neuronal cells
Gene	logFC	logCPM	F	PValue	FDR	Observations_Extended	Observations_Control	level
Sus_scrofa___hCD46	6.89641	8.35593	55.774	2.34882e-10	3.25804e-06	3	4	Up-regulated
Sus_scrofa___HERC5	4.58174	8.34718	43.1978	6.47763e-09	4.49256e-05	3	4	Up-regulated
Sus_scrofa___MX2	4.23556	8.71126	34.4958	1.29644e-07	0.000359659	3	4	Up-regulated
Sus_scrofa___ADGRB3	4.34436	9.07089	32.305	2.81386e-07	0.000650517	3	4	Up-regulated
Sus_scrofa___RSAD2	5.85335	7.54827	31.0537	3.71235e-07	0.000735629	3	4	Up-regulated
Sus_scrofa___OAS2	3.38107	8.39414	28.9177	9.50108e-07	0.00164737	3	4	Up-regulated
Sus_scrofa___HERC6	2.59299	8.86384	27.0447	1.92892e-06	0.00297289	3	4	Up-regulated
Sus_scrofa___VWA5A	3.4744	7.30247	25.9524	2.365e-06	0.00298227	3	4	Up-regulated
Sus_scrofa___ENO1	4.36597	7.18048	25.4284	3.1067e-06	0.00359108	3	4	Up-regulated
Sus_scrofa___CSMD3	4.42157	6.67402	22.9637	6.49019e-06	0.00687379	3	4	Up-regulated
Sus_scrofa___CACNA1B	5.20317	6.88029	23.2061	7.5376e-06	0.00697027	3	4	Up-regulated
Sus_scrofa___ZNFX1	3.02788	7.90642	22.8311	9.36726e-06	0.00812083	3	4	Up-regulated
Sus_scrofa___USP53	2.58241	10.0015	22.4996	1.08939e-05	0.00888878	3	4	Up-regulated
Sus_scrofa___NDST4	5.11255	7.11668	21.5472	1.43274e-05	0.0110409	3	4	Up-regulated
Sus_scrofa___EPSTI1	3.16788	7.86891	21.2209	1.69502e-05	0.0123745	3	4	Up-regulated
Sus_scrofa___IFIH1	2.87383	7.71181	20.6685	2.15729e-05	0.0142494	3	4	Up-regulated
Sus_scrofa___BNIP3	3.08236	7.05346	19.5568	3.22475e-05	0.017749	3	4	Up-regulated
Sus_scrofa___ZMAT3	5.491	6.03579	19.6347	3.22818e-05	0.017749	3	4	Up-regulated
Sus_scrofa___DDX60	4.47661	6.77127	19.2429	3.3269e-05	0.017749	3	4	Up-regulated
Sus_scrofa___SEMA5B	5.64266	5.81746	20.1081	3.71084e-05	0.0190641	3	4	Up-regulated
Sus_scrofa___MX1	2.77877	8.18579	18.6666	4.98594e-05	0.0234173	3	4	Up-regulated
Sus_scrofa___PARP14	2.98098	7.26621	17.6135	7.21702e-05	0.0319666	3	4	Up-regulated
Sus_scrofa___EIF2AK2	2.33091	8.59435	17.7434	7.47841e-05	0.0319666	3	4	Up-regulated
Sus_scrofa___TRANK1	2.79763	7.21466	17.5804	7.60507e-05	0.0319666	3	4	Up-regulated
Sus_scrofa___ENSSSCG00000034570	3.62446	8.50485	17.2418	8.94064e-05	0.0331952	3	4	Up-regulated
Sus_scrofa___NFIL3	5.41847	6.78533	17.0249	9.59889e-05	0.0331952	3	4	Up-regulated
Sus_scrofa___SAMHD1	2.36217	7.95671	17.0434	9.87071e-05	0.0331952	3	4	Up-regulated
Sus_scrofa___SESN2	4.37636	6.08402	16.7872	0.000100512	0.0331952	3	4	Up-regulated
Sus_scrofa___NPPA	5.90534	6.37745	16.5808	0.000116442	0.0375621	3	4	Up-regulated
Sus_scrofa___TBC1D32	2.45843	7.67338	16.4563	0.000124877	0.0383787	3	4	Up-regulated
Sus_scrofa___IFI44	2.43178	7.38183	15.8848	0.000159115	0.045981	3	4	Up-regulated
Sus_scrofa___SHTN1	3.78011	7.13536	15.6182	0.000174512	0.0480025	3	4	Up-regulated
Sus_scrofa___VMP1	2.06579	8.38518	15.3054	0.000210953	0.049908	3	4	Up-regulated
Sus_scrofa___STAT1	1.93829	8.67079	15.2736	0.000214285	0.049908	3	4	Up-regulated
Sus_scrofa___ISG15	4.39535	7.53929	15.0308	0.000219479	0.049908	3	4	Up-regulated
Sus_scrofa___ENSSSCG00000032439	-4.11059	8.54838	36.8294	5.54326e-08	0.000256302	3	4	Down-regulated
Sus_scrofa___CNTN3	-4.7135	9.62086	35.6653	8.74908e-08	0.000303396	3	4	Down-regulated
Sus_scrofa___ENSSSCG00000033643	-2.87434	10.0948	26.586	2.28242e-06	0.00298227	3	4	Down-regulated
Sus_scrofa___SLITRK6	-6.99568	7.65964	23.4584	6.93771e-06	0.00687379	3	4	Down-regulated
Sus_scrofa___ENSSSCG00000015747	-4.0651	7.98793	20.7157	2.07606e-05	0.0142494	3	4	Down-regulated
Sus_scrofa___HTR1E	-6.18126	7.06004	20.0179	2.71146e-05	0.0170957	3	4	Down-regulated
Sus_scrofa___NRXN1	-2.17817	12.1602	19.8803	3.09578e-05	0.017749	3	4	Down-regulated
Sus_scrofa___SIPA1L2	-2.28024	9.35106	19.1252	4.22535e-05	0.0209321	3	4	Down-regulated
Sus_scrofa___RORA	-2.16233	10.1881	18.6795	5.06466e-05	0.0234173	3	4	Down-regulated
Sus_scrofa___CORO2B	-2.03262	9.60982	17.5754	8.03383e-05	0.0327756	3	4	Down-regulated
Sus_scrofa___SRCIN1	-3.24197	8.13245	17.402	8.40358e-05	0.0331952	3	4	Down-regulated
Sus_scrofa___PHLDB1	-2.06061	9.36738	17.3432	8.85991e-05	0.0331952	3	4	Down-regulated
Sus_scrofa___PRDM8	-3.40516	7.25659	16.8379	9.89117e-05	0.0331952	3	4	Down-regulated
Sus_scrofa___ENSSSCG00000027348	-2.61993	8.1653	17.0208	9.92352e-05	0.0331952	3	4	Down-regulated
Sus_scrofa___EXOSC10	-5.669	6.58445	16.3304	0.000120091	0.0378588	3	4	Down-regulated
Sus_scrofa___ARHGEF6	-2.6052	8.3157	16.4612	0.000127274	0.0383787	3	4	Down-regulated
Sus_scrofa___TRABD2B	-5.69677	6.66472	16.2603	0.000131456	0.0387963	3	4	Down-regulated
Sus_scrofa___ENSSSCG00000004082	-2.08146	8.47446	15.893	0.000163528	0.0462917	3	4	Down-regulated
Sus_scrofa___SNX24	-3.00315	8.12588	15.6423	0.000177524	0.0480025	3	4	Down-regulated
Sus_scrofa___MEIOB	-2.39904	8.13262	15.6069	0.000182614	0.0480025	3	4	Down-regulated
Sus_scrofa___CDK5RAP2	-2.42011	8.374	15.6163	0.000183414	0.0480025	3	4	Down-regulated
Sus_scrofa___RGL1	-3.88897	7.37244	15.4331	0.00019258	0.0488311	3	4	Down-regulated
Sus_scrofa___TNNC1	-6.01415	6.81648	15.3499	0.000193621	0.0488311	3	4	Down-regulated
Sus_scrofa___CLEC16A	-3.82222	7.37477	15.3121	0.000203844	0.049908	3	4	Down-regulated
Sus_scrofa___COL15A1	-2.85691	8.08995	15.1785	0.000219024	0.049908	3	4	Down-regulated
Sus_scrofa___COL14A1	-2.53218	8.37164	15.2095	0.000219264	0.049908	3	4	Down-regulated

## Sheet: Resident Immune
Gene	logFC	logCPM	F	PValue	FDR	Observations_Extended	Observations_Control	level
Sus_scrofa___hCD46	9.73626	8.46915	89.4633	5.56343e-15	1.06061e-10	3	4	Up-regulated
Sus_scrofa___ENSSSCG00000029160	8.49591	8.90489	70.7039	9.13454e-13	7.39953e-09	3	4	Up-regulated
Sus_scrofa___HK2	6.6169	7.3231	66.2581	1.16442e-12	7.39953e-09	3	4	Up-regulated
Sus_scrofa___phTBM	8.0181	5.70997	57.4995	2.87147e-11	1.09483e-07	3	4	Up-regulated
Sus_scrofa___LHX4	10.0283	6.50921	57.4235	8.06038e-11	2.56105e-07	3	4	Up-regulated
Sus_scrofa___GADD45B	6.34546	7.04167	53.9259	1.02887e-10	2.80206e-07	3	4	Up-regulated
Sus_scrofa___GTF2IRD1	5.63081	7.41639	50.9552	1.59618e-10	3.68149e-07	3	4	Up-regulated
Sus_scrofa___ISG15	6.14032	7.85866	52.9641	1.73801e-10	3.68149e-07	3	4	Up-regulated
Sus_scrofa___DNAJB13	8.30998	6.17133	50.516	3.51397e-10	5.54861e-07	3	4	Up-regulated
Sus_scrofa___ENSSSCG00000013361	5.07408	6.1036	46.2351	8.00352e-10	8.5048e-07	3	4	Up-regulated
Sus_scrofa___ENSSSCG00000051775	8.2556	5.54228	50.044	8.03013e-10	8.5048e-07	3	4	Up-regulated
Sus_scrofa___DNAJB1	5.49671	6.60852	47.124	1.02364e-09	9.3727e-07	3	4	Up-regulated
Sus_scrofa___HSPA5	5.8639	7.90458	45.7812	1.08456e-09	9.3727e-07	3	4	Up-regulated
Sus_scrofa___PPP1R15A	5.56557	5.67564	43.2605	2.97237e-09	2.02376e-06	3	4	Up-regulated
Sus_scrofa___ENSSSCG00000033821	7.84118	5.22501	45.0677	3.69938e-09	2.34821e-06	3	4	Up-regulated
Sus_scrofa___FOSB	7.03033	5.50017	40.1726	1.13527e-08	5.4107e-06	3	4	Up-regulated
Sus_scrofa___TMEM108	4.45397	6.25585	36.5154	2.74821e-08	1.02729e-05	3	4	Up-regulated
Sus_scrofa___SERP2	4.81151	6.2837	36.2102	4.06193e-08	1.29061e-05	3	4	Up-regulated
Sus_scrofa___BNIP3	4.15037	7.75786	35.7081	4.32159e-08	1.32882e-05	3	4	Up-regulated
Sus_scrofa___AMD1	4.10777	7.58579	35.3041	4.49618e-08	1.3536e-05	3	4	Up-regulated
Sus_scrofa___RFC2	4.46421	7.95236	35.4116	4.54419e-08	1.3536e-05	3	4	Up-regulated
Sus_scrofa___ENSSSCG00000040680	7.21338	4.78466	37.2087	4.76555e-08	1.35598e-05	3	4	Up-regulated
Sus_scrofa___RND1	7.18877	4.80086	36.5793	4.84564e-08	1.35849e-05	3	4	Up-regulated
Sus_scrofa___ENSSSCG00000041495	7.18877	4.76865	36.898	5.29296e-08	1.41734e-05	3	4	Up-regulated
Sus_scrofa___ORC1	6.24814	5.53111	35.2966	5.59279e-08	1.45326e-05	3	4	Up-regulated
Sus_scrofa___OASL	6.31385	4.92539	35.4297	6.15712e-08	1.52092e-05	3	4	Up-regulated
Sus_scrofa___ENSSSCG00000028810	7.0854	4.71153	35.2523	8.47112e-08	1.85625e-05	3	4	Up-regulated
Sus_scrofa___KLF5	6.45046	5.26629	33.5162	9.73068e-08	2.01637e-05	3	4	Up-regulated
Sus_scrofa___GPC5	4.49711	6.71427	33.1959	1.01201e-07	2.07451e-05	3	4	Up-regulated
Sus_scrofa___RPL3L	5.15028	6.02565	33.9004	1.12963e-07	2.16952e-05	3	4	Up-regulated
Sus_scrofa___SLC31A1	4.29112	6.37516	32.9466	1.16233e-07	2.19393e-05	3	4	Up-regulated
Sus_scrofa___NOCT	4.40916	6.0828	33.3649	1.26546e-07	2.27969e-05	3	4	Up-regulated
Sus_scrofa___ZNF367	4.91317	6.66871	33.2807	1.34878e-07	2.33204e-05	3	4	Up-regulated
Sus_scrofa___ENSSSCG00000038594	4.2714	5.91062	32.2765	1.36583e-07	2.33204e-05	3	4	Up-regulated
Sus_scrofa___ENO1	3.67988	8.03682	32.385	1.37006e-07	2.33204e-05	3	4	Up-regulated
Sus_scrofa___ENSSSCG00000035789	6.23957	8.09278	32.7024	1.38548e-07	2.33741e-05	3	4	Up-regulated
Sus_scrofa___DNAJB9	4.67388	6.18198	31.8868	1.54031e-07	2.48851e-05	3	4	Up-regulated
Sus_scrofa___SLCO6A1	6.79071	6.5296	31.9621	1.72043e-07	2.68838e-05	3	4	Up-regulated
Sus_scrofa___ELL2	4.4482	6.94989	31.4043	1.96763e-07	2.99129e-05	3	4	Up-regulated
Sus_scrofa___H2AC12	6.91302	4.63587	32.195	2.55374e-07	3.47746e-05	3	4	Up-regulated
Sus_scrofa___ENSSSCG00000007554	4.65582	6.09117	30.1749	2.94808e-07	3.85059e-05	3	4	Up-regulated
Sus_scrofa___CLU	4.19607	6.16465	30.4984	2.99498e-07	3.8841e-05	3	4	Up-regulated
Sus_scrofa___IER5	4.64534	5.15749	30.5467	3.0948e-07	3.98643e-05	3	4	Up-regulated
Sus_scrofa___HES4	5.80871	4.626	30.4962	3.53485e-07	4.26508e-05	3	4	Up-regulated
Sus_scrofa___NPPB	6.77726	4.76191	30.1675	3.56149e-07	4.2702e-05	3	4	Up-regulated
Sus_scrofa___SYCP2	3.45446	7.20803	29.7864	3.75278e-07	4.44366e-05	3	4	Up-regulated
Sus_scrofa___ABHD5	3.9803	5.76656	29.3739	4.38758e-07	4.99473e-05	3	4	Up-regulated
Sus_scrofa___CLDN6	6.67752	4.46139	30.5723	4.82558e-07	5.31762e-05	3	4	Up-regulated
Sus_scrofa___CSKMT	6.35423	4.60589	29.2703	5.89302e-07	6.10568e-05	3	4	Up-regulated
Sus_scrofa___RANBP1	3.82658	5.85618	28.3376	6.46907e-07	6.63045e-05	3	4	Up-regulated
Sus_scrofa___ENSSSCG00000003444	6.60142	4.42009	29.6713	6.69059e-07	6.74979e-05	3	4	Up-regulated
Sus_scrofa___IER3	4.97691	5.47684	28.05	6.8709e-07	6.85795e-05	3	4	Up-regulated
Sus_scrofa___RPP30	4.34135	7.55521	28.4407	6.9441e-07	6.89395e-05	3	4	Up-regulated
Sus_scrofa___MCM10	3.90782	5.88581	28.0135	7.36666e-07	7.20195e-05	3	4	Up-regulated
Sus_scrofa___CKB	5.07614	4.80671	28.7577	7.68475e-07	7.42601e-05	3	4	Up-regulated
Sus_scrofa___HES1	3.73987	5.93302	28.3778	7.75165e-07	7.42601e-05	3	4	Up-regulated
Sus_scrofa___FGF18	5.34925	4.73231	28.5042	8.14834e-07	7.5601e-05	3	4	Up-regulated
Sus_scrofa___OLR1	5.32446	5.4816	27.8261	8.19298e-07	7.5601e-05	3	4	Up-regulated
Sus_scrofa___XKR9	5.62247	4.41799	28.3433	9.94676e-07	8.81977e-05	3	4	Up-regulated
Sus_scrofa___BAG3	4.23752	6.20331	27.1463	1.03798e-06	9.12596e-05	3	4	Up-regulated
Sus_scrofa___PPP1R15B	3.76033	5.78837	27.546	1.11284e-06	9.68732e-05	3	4	Up-regulated
Sus_scrofa___NUDC	3.60156	6.4039	26.9434	1.13342e-06	9.72509e-05	3	4	Up-regulated
Sus_scrofa___ENSSSCG00000037632	6.47798	4.35566	28.2252	1.13802e-06	9.72509e-05	3	4	Up-regulated
Sus_scrofa___CACYBP	3.46519	7.53662	27.0093	1.1563e-06	9.75382e-05	3	4	Up-regulated
Sus_scrofa___ENSSSCG00000014964	6.47798	4.36783	27.9468	1.18427e-06	9.90218e-05	3	4	Up-regulated
Sus_scrofa___KRT14	4.42041	5.15116	27.4209	1.26933e-06	0.000104755	3	4	Up-regulated
Sus_scrofa___HSPH1	3.71832	7.13479	27.3009	1.31587e-06	0.000108128	3	4	Up-regulated
Sus_scrofa___HOOK2	4.34041	5.71174	26.4454	1.33611e-06	0.000108853	3	4	Up-regulated
Sus_scrofa___ENSSSCG00000023041	4.24594	6.30336	26.331	1.43096e-06	0.000115105	3	4	Up-regulated
Sus_scrofa___SNAI1	6.29213	4.68755	26.8313	1.5257e-06	0.00012221	3	4	Up-regulated
Sus_scrofa___SMIM2	5.02898	4.91634	26.3288	1.70874e-06	0.000132229	3	4	Up-regulated
Sus_scrofa___ENSSSCG00000013880	6.53504	4.76928	25.9468	1.73603e-06	0.000133451	3	4	Up-regulated
Sus_scrofa___PTP4A1	4.24759	5.55768	25.9536	1.87368e-06	0.000141745	3	4	Up-regulated
Sus_scrofa___UPP1	4.59236	5.13833	25.8767	2.003e-06	0.000149161	3	4	Up-regulated
Sus_scrofa___CDCA5	5.15177	4.6468	26.2852	2.01243e-06	0.00014928	3	4	Up-regulated
Sus_scrofa___TOB2	3.5959	6.5558	25.9285	2.06959e-06	0.000152925	3	4	Up-regulated
Sus_scrofa___NFIL3	4.05664	6.13907	25.5286	2.14809e-06	0.000157505	3	4	Up-regulated
Sus_scrofa___MAFF	4.70629	5.27152	25.1171	2.30124e-06	0.000164067	3	4	Up-regulated
Sus_scrofa___CCDC152	6.16671	4.70057	25.322	2.3048e-06	0.000164067	3	4	Up-regulated
Sus_scrofa___CDKN1A	4.91428	5.19347	25.3917	2.35288e-06	0.00016613	3	4	Up-regulated
Sus_scrofa___ENSSSCG00000044013	4.75923	4.96761	25.635	2.37991e-06	0.000166804	3	4	Up-regulated
Sus_scrofa___ELAPOR2	3.88523	5.81861	24.9814	2.44823e-06	0.000169128	3	4	Up-regulated
Sus_scrofa___TUBB4B	4.0365	6.10794	25.0674	2.44855e-06	0.000169128	3	4	Up-regulated
Sus_scrofa___EIF4E	3.24727	7.00106	24.8708	2.71643e-06	0.000180439	3	4	Up-regulated
Sus_scrofa___TCTN1	4.17543	5.51824	24.5258	2.85153e-06	0.000188102	3	4	Up-regulated
Sus_scrofa___RAB34	4.48611	4.5849	24.8317	3.05311e-06	0.000198432	3	4	Up-regulated
Sus_scrofa___TBC1D32	3.22162	6.80607	24.4312	3.25201e-06	0.000208742	3	4	Up-regulated
Sus_scrofa___PCSK5	3.59205	7.96509	24.5823	3.44307e-06	0.000219527	3	4	Up-regulated
Sus_scrofa___TSC22D2	3.34217	7.39571	24.1308	3.72632e-06	0.00023368	3	4	Up-regulated
Sus_scrofa___IFIT1	3.56942	7.63584	24.1135	3.77134e-06	0.000234414	3	4	Up-regulated
Sus_scrofa___HCN2	5.18882	4.40729	24.094	4.03828e-06	0.000244723	3	4	Up-regulated
Sus_scrofa___CIDEC	5.86143	4.27036	24.2585	4.04363e-06	0.000244723	3	4	Up-regulated
Sus_scrofa___MRPS30	3.52899	5.97578	23.8497	4.08321e-06	0.000245559	3	4	Up-regulated
Sus_scrofa___ADCY8	3.9686	5.53921	23.9474	4.26579e-06	0.000252556	3	4	Up-regulated
Sus_scrofa___TRIM72	4.27672	4.82863	23.6762	4.29576e-06	0.000253543	3	4	Up-regulated
Sus_scrofa___HSPA1L	5.40713	4.45315	24.2978	4.44254e-06	0.000258209	3	4	Up-regulated
Sus_scrofa___HSPD1	3.2006	6.8976	23.6835	4.48583e-06	0.000259933	3	4	Up-regulated
Sus_scrofa___HS3ST3A1	4.45903	4.8249	23.9525	4.50948e-06	0.000260511	3	4	Up-regulated
Sus_scrofa___MTMR7	3.63931	5.51248	23.4684	4.58465e-06	0.000262468	3	4	Up-regulated
Sus_scrofa___ASF1B	4.45841	4.64978	23.9768	4.88483e-06	0.000273354	3	4	Up-regulated
Sus_scrofa___ENSSSCG00000034113	6.13222	4.19239	24.3207	4.98915e-06	0.000273354	3	4	Up-regulated
Sus_scrofa___PGK1	3.41919	6.19618	23.3862	5.00422e-06	0.000273354	3	4	Up-regulated
Sus_scrofa___PEG10	5.33894	4.2658	23.8264	5.65698e-06	0.000304624	3	4	Up-regulated
Sus_scrofa___CNN1	4.69309	4.66811	23.2649	5.67255e-06	0.000304624	3	4	Up-regulated
Sus_scrofa___SLC30A1	5.15634	4.92335	23.0105	5.93186e-06	0.00031588	3	4	Up-regulated
Sus_scrofa___FEM1C	3.25076	5.88107	23.0563	6.02449e-06	0.00031903	3	4	Up-regulated
Sus_scrofa___ENSSSCG00000046061	6.07405	4.16741	23.6893	6.37675e-06	0.000334894	3	4	Up-regulated
Sus_scrofa___ENSSSCG00000034015	3.94626	5.63376	22.8016	6.52598e-06	0.000341546	3	4	Up-regulated
Sus_scrofa___GRM3	6.00586	4.19239	23.2167	6.55999e-06	0.000341546	3	4	Up-regulated
Sus_scrofa___ACVR1B	3.70906	5.71944	22.9625	6.62823e-06	0.000341546	3	4	Up-regulated
Sus_scrofa___CFAP300	4.91528	5.16056	22.6582	6.62882e-06	0.000341546	3	4	Up-regulated
Sus_scrofa___ENSSSCG00000010517	3.66433	5.73102	22.7497	6.71108e-06	0.000344852	3	4	Up-regulated
Sus_scrofa___UBC	3.22345	7.16352	22.6855	6.90608e-06	0.000353579	3	4	Up-regulated
Sus_scrofa___TOP2A	3.74894	6.58791	23.0746	7.05571e-06	0.000359653	3	4	Up-regulated
Sus_scrofa___RNF19B	3.07703	7.50934	22.6851	7.08373e-06	0.000359771	3	4	Up-regulated
Sus_scrofa___TFB2M	4.16436	5.17476	22.6702	7.11203e-06	0.000359771	3	4	Up-regulated
Sus_scrofa___ENSSSCG00000010099	4.50528	4.84583	22.892	7.15239e-06	0.000359771	3	4	Up-regulated
Sus_scrofa___HSPE1	3.8118	5.71101	22.5813	8.2918e-06	0.000407409	3	4	Up-regulated
Sus_scrofa___KLHL21	3.5103	6.18402	22.195	8.64876e-06	0.000419616	3	4	Up-regulated
Sus_scrofa___ENSSSCG00000033533	5.13906	4.39117	22.288	8.69379e-06	0.000420656	3	4	Up-regulated
Sus_scrofa___ADM	4.46915	4.93863	22.0414	9.02432e-06	0.000434443	3	4	Up-regulated
Sus_scrofa___ENSSSCG00000009670	4.31682	4.71109	22.2328	9.11536e-06	0.000435918	3	4	Up-regulated
Sus_scrofa___ZMAT3	4.36033	4.89631	22.1408	9.12354e-06	0.000435918	3	4	Up-regulated
Sus_scrofa___SPATA2	3.8882	5.21293	21.9218	9.1535e-06	0.000436029	3	4	Up-regulated
Sus_scrofa___TAF4B	3.10028	6.49269	21.9093	9.27902e-06	0.000440038	3	4	Up-regulated
Sus_scrofa___PHLDA2	5.26495	4.56418	22.0311	9.36074e-06	0.000442812	3	4	Up-regulated
Sus_scrofa___SNIP1	3.53994	5.62681	22.0248	9.65491e-06	0.000453353	3	4	Up-regulated
Sus_scrofa___ENSSSCG00000049674	5.24553	4.42279	22.1917	9.76538e-06	0.000457413	3	4	Up-regulated
Sus_scrofa___CXCL11	6.15346	4.26973	22.3431	1.01015e-05	0.000470845	3	4	Up-regulated
Sus_scrofa___SERPINA3-2	5.08467	4.38382	21.9163	1.0232e-05	0.000475764	3	4	Up-regulated
Sus_scrofa___RSAD2	3.75859	7.66841	21.8284	1.09259e-05	0.000503118	3	4	Up-regulated
Sus_scrofa___WEE1	3.47502	5.17375	21.7564	1.11918e-05	0.000511657	3	4	Up-regulated
Sus_scrofa___SORCS3	6.04871	4.48603	21.5835	1.15905e-05	0.000526098	3	4	Up-regulated
Sus_scrofa___ENSSSCG00000003079	4.25594	5.70069	21.2186	1.20117e-05	0.000542631	3	4	Up-regulated
Sus_scrofa___SRXN1	5.96988	4.8959	21.2152	1.24602e-05	0.000556304	3	4	Up-regulated
Sus_scrofa___IFIT2	3.649	7.00265	21.5238	1.25664e-05	0.000557838	3	4	Up-regulated
Sus_scrofa___GALNT14	5.88134	4.13995	21.804	1.25824e-05	0.000557838	3	4	Up-regulated
Sus_scrofa___ENSSSCG00000036469	4.35526	5.13286	21.2549	1.32381e-05	0.0005815	3	4	Up-regulated
Sus_scrofa___SPAG16	3.12567	6.34563	21.2466	1.36099e-05	0.000595091	3	4	Up-regulated
Sus_scrofa___FAM222A	4.53815	5.43173	21.0204	1.42039e-05	0.000615204	3	4	Up-regulated
Sus_scrofa___ENSSSCG00000039417	5.88134	4.08968	21.6569	1.42313e-05	0.000615204	3	4	Up-regulated
Sus_scrofa___HCN4	5.94893	4.15732	21.5249	1.45853e-05	0.000626611	3	4	Up-regulated
Sus_scrofa___EGR1	3.73384	5.0539	20.6977	1.46815e-05	0.000627554	3	4	Up-regulated
Sus_scrofa___LMNA	2.95411	7.14958	20.8288	1.48792e-05	0.000634578	3	4	Up-regulated
Sus_scrofa___BPGM	5.69729	4.20078	21.1488	1.51321e-05	0.000641064	3	4	Up-regulated
Sus_scrofa___GPR158	4.80213	4.90477	20.8473	1.52481e-05	0.000643121	3	4	Up-regulated
Sus_scrofa___ENSSSCG00000022820	3.75276	6.14145	20.6968	1.54495e-05	0.000650175	3	4	Up-regulated
Sus_scrofa___GPRC5A	3.71693	4.73747	21.037	1.55513e-05	0.000653019	3	4	Up-regulated
Sus_scrofa___EGLN3	3.37208	5.98827	20.6376	1.58609e-05	0.000663099	3	4	Up-regulated
Sus_scrofa___RBM15	3.0186	6.48274	20.897	1.61399e-05	0.000669385	3	4	Up-regulated
Sus_scrofa___FLNC	3.43502	6.63207	20.4099	1.74539e-05	0.000718662	3	4	Up-regulated
Sus_scrofa___PIM2	5.73408	4.10441	20.8998	1.79128e-05	0.000734385	3	4	Up-regulated
Sus_scrofa___BRD2	3.13166	8.38245	20.314	1.84781e-05	0.000747912	3	4	Up-regulated
Sus_scrofa___ENSSSCG00000035473	3.98548	5.08119	20.4073	1.88698e-05	0.000758931	3	4	Up-regulated
Sus_scrofa___NTSR2	5.00427	4.16402	20.7267	1.96258e-05	0.000782734	3	4	Up-regulated
Sus_scrofa___KLF10	3.15645	6.17506	20.4036	1.97333e-05	0.000785379	3	4	Up-regulated
Sus_scrofa___CTPS1	4.79856	5.25906	20.3862	1.99061e-05	0.000788959	3	4	Up-regulated
Sus_scrofa___PPP1R3B	4.218	4.64855	20.2665	1.99737e-05	0.000789208	3	4	Up-regulated
Sus_scrofa___MROH5	4.93884	4.32728	20.3307	2.03067e-05	0.000798202	3	4	Up-regulated
Sus_scrofa___ISG12(A)	3.49207	6.79335	20.124	2.04479e-05	0.000800449	3	4	Up-regulated
Sus_scrofa___LRRC74B	3.56247	5.34286	20.0892	2.13067e-05	0.000828497	3	4	Up-regulated
Sus_scrofa___FAM162A	3.04047	6.24679	19.9314	2.15147e-05	0.000833649	3	4	Up-regulated
Sus_scrofa___STIP1	3.21637	5.59525	20.0809	2.20092e-05	0.000845936	3	4	Up-regulated
Sus_scrofa___ANKRD2	5.80983	4.05731	20.4209	2.28192e-05	0.000868315	3	4	Up-regulated
Sus_scrofa___KIAA0319	4.34032	5.41545	19.6784	2.32401e-05	0.000875804	3	4	Up-regulated
Sus_scrofa___RTN2	2.99327	6.23454	19.8005	2.32457e-05	0.000875804	3	4	Up-regulated
Sus_scrofa___ITGB8	3.03137	7.68111	19.774	2.4509e-05	0.000913266	3	4	Up-regulated
Sus_scrofa___TBRG4	3.17914	6.01072	19.742	2.47141e-05	0.000916632	3	4	Up-regulated
Sus_scrofa___GNL3	3.31895	6.22897	19.8273	2.4983e-05	0.000923015	3	4	Up-regulated
Sus_scrofa___ARNTL2	3.53069	6.69201	19.6743	2.53249e-05	0.000932034	3	4	Up-regulated
Sus_scrofa___ENSSSCG00000001931	4.70122	4.42803	19.6007	2.75253e-05	0.00099761	3	4	Up-regulated
Sus_scrofa___PCLAF	3.61723	5.46039	19.6695	2.8032e-05	0.00101212	3	4	Up-regulated
Sus_scrofa___FAM227B	2.91352	8.0929	19.3368	2.83279e-05	0.00101895	3	4	Up-regulated
Sus_scrofa___LDHC	4.92004	6.07698	19.2117	2.95426e-05	0.0010479	3	4	Up-regulated
Sus_scrofa___DLG3	5.56476	4.09183	19.4398	3.1487e-05	0.00110955	3	4	Up-regulated
Sus_scrofa___AREG	5.85556	4.11658	19.5637	3.17872e-05	0.00111647	3	4	Up-regulated
Sus_scrofa___ENSSSCG00000016646	2.97039	7.21312	19.1236	3.18972e-05	0.00111781	3	4	Up-regulated
Sus_scrofa___HNF1B	3.51317	5.38383	19.0344	3.24484e-05	0.00113504	3	4	Up-regulated
Sus_scrofa___SLIT2	2.72524	7.17744	18.9393	3.33803e-05	0.00115702	3	4	Up-regulated
Sus_scrofa___AEN	3.87201	4.9646	19.0025	3.3554e-05	0.00116093	3	4	Up-regulated
Sus_scrofa___NUP210L	3.54944	5.19008	18.6785	3.65325e-05	0.00124188	3	4	Up-regulated
Sus_scrofa___ZBTB10	2.6049	6.55174	18.7076	3.74292e-05	0.00126516	3	4	Up-regulated
Sus_scrofa___FBL	3.21648	5.56233	18.7274	3.88449e-05	0.00130837	3	4	Up-regulated
Sus_scrofa___XIRP2	3.38852	5.73651	18.5077	3.96632e-05	0.00133044	3	4	Up-regulated
Sus_scrofa___ERICH6	4.60834	4.60298	18.3828	4.11165e-05	0.00136855	3	4	Up-regulated
Sus_scrofa___CSRP1	3.45119	6.0085	18.6525	4.15343e-05	0.00137946	3	4	Up-regulated
Sus_scrofa___C3orf20	4.71467	4.54909	18.4901	4.25212e-05	0.00140246	3	4	Up-regulated
Sus_scrofa___UXT	4.17894	4.53304	18.4634	4.37018e-05	0.00143843	3	4	Up-regulated
Sus_scrofa___ENSSSCG00000049011	5.56476	4.25288	18.5786	4.38276e-05	0.00143843	3	4	Up-regulated
Sus_scrofa___NFKBIA	2.86113	8.38789	18.3361	4.39114e-05	0.00143843	3	4	Up-regulated
Sus_scrofa___DYNLL2	3.4387	5.10449	18.4228	4.50251e-05	0.00146478	3	4	Up-regulated
Sus_scrofa___ENSSSCG00000002459	3.46941	5.198	18.4392	4.54528e-05	0.00146962	3	4	Up-regulated
Sus_scrofa___GMNN	2.82619	6.74471	18.238	4.54823e-05	0.00146962	3	4	Up-regulated
Sus_scrofa___STAT5A	2.86515	7.18667	18.2861	4.5726e-05	0.00147499	3	4	Up-regulated
Sus_scrofa___ENSSSCG00000048667	5.56707	3.97895	18.5563	5.04442e-05	0.00158691	3	4	Up-regulated
Sus_scrofa___VEGFA	3.07444	6.41494	17.9541	5.13744e-05	0.00160821	3	4	Up-regulated
Sus_scrofa___IGF2BP2	2.70427	7.21978	17.9251	5.26141e-05	0.00163225	3	4	Up-regulated
Sus_scrofa___STXBP5L	3.60355	6.11058	17.9136	5.26559e-05	0.00163225	3	4	Up-regulated
Sus_scrofa___NETO2	4.14317	5.32727	17.7646	5.32492e-05	0.0016439	3	4	Up-regulated
Sus_scrofa___MANF	3.47969	5.43635	17.9448	5.40394e-05	0.00165895	3	4	Up-regulated
Sus_scrofa___TUSC3	2.99082	5.98143	17.7457	5.62428e-05	0.00171829	3	4	Up-regulated
Sus_scrofa___WDR74	2.86547	5.74957	17.8764	5.72349e-05	0.00174333	3	4	Up-regulated
Sus_scrofa___HMGN1	2.92425	5.55651	17.7274	5.79363e-05	0.00175903	3	4	Up-regulated
Sus_scrofa___MLLT11	3.84874	4.82093	17.552	5.87597e-05	0.00177809	3	4	Up-regulated
Sus_scrofa___APOBEC2	3.12781	6.71075	17.6091	6.12966e-05	0.00184315	3	4	Up-regulated
Sus_scrofa___DNAH12	3.77062	5.47496	17.4222	6.36551e-05	0.00190506	3	4	Up-regulated
Sus_scrofa___MRPL12	2.99937	6.30629	17.463	6.44024e-05	0.00191839	3	4	Up-regulated
Sus_scrofa___CAVIN1	2.9021	5.867	17.5134	6.66847e-05	0.0019771	3	4	Up-regulated
Sus_scrofa___POLH	2.76725	6.23863	17.4272	6.6997e-05	0.00198328	3	4	Up-regulated
Sus_scrofa___ENSSSCG00000009667	5.9288	4.24189	17.5542	6.8242e-05	0.00201076	3	4	Up-regulated
Sus_scrofa___LHFPL4	5.60099	4.00607	17.698	6.89017e-05	0.00202707	3	4	Up-regulated
Sus_scrofa___SNAPC1	2.78622	7.28644	17.3094	6.91047e-05	0.00202967	3	4	Up-regulated
Sus_scrofa___H2AC11	4.40723	4.42631	17.4757	7.05125e-05	0.00206173	3	4	Up-regulated
Sus_scrofa___ATF3	3.41352	5.97803	17.1769	7.17778e-05	0.00209231	3	4	Up-regulated
Sus_scrofa___NOP58	2.37438	7.6644	17.1869	7.34616e-05	0.00213162	3	4	Up-regulated
Sus_scrofa___CSMD3	3.13967	5.18494	17.3032	7.42271e-05	0.00215056	3	4	Up-regulated
Sus_scrofa___FJX1	4.65899	4.39319	17.2769	7.44826e-05	0.00215454	3	4	Up-regulated
Sus_scrofa___SRSF12	3.35049	5.71492	17.0333	7.61299e-05	0.00218905	3	4	Up-regulated
Sus_scrofa___AVPI1	4.05744	4.40028	17.2155	7.79873e-05	0.00223236	3	4	Up-regulated
Sus_scrofa___MXD1	2.80344	6.56249	17.2194	7.84273e-05	0.00224159	3	4	Up-regulated
Sus_scrofa___PRR16	2.92346	8.51707	17.1332	7.86257e-05	0.00224389	3	4	Up-regulated
Sus_scrofa___SIAH2	3.15308	5.55991	16.9539	7.87734e-05	0.00224475	3	4	Up-regulated
Sus_scrofa___PRR3	2.92657	5.63825	17.129	7.91676e-05	0.00225261	3	4	Up-regulated
Sus_scrofa___GREB1L	2.68886	6.00807	16.9364	7.99554e-05	0.00226863	3	4	Up-regulated
Sus_scrofa___TPH2	4.26968	4.58188	16.9291	7.99685e-05	0.00226863	3	4	Up-regulated
Sus_scrofa___OSER1	2.85195	5.81071	17.1289	8.01679e-05	0.00227091	3	4	Up-regulated
Sus_scrofa___RTKN2	3.06187	5.3984	17.1835	8.05296e-05	0.00227777	3	4	Up-regulated
Sus_scrofa___HSPA8	2.57969	7.58446	17.053	8.10032e-05	0.00228777	3	4	Up-regulated
Sus_scrofa___CXXC4	4.37516	4.20937	17.1859	8.14967e-05	0.0022983	3	4	Up-regulated
Sus_scrofa___GJA10	5.47433	4.06004	17.1678	8.24877e-05	0.00231257	3	4	Up-regulated
Sus_scrofa___ENSSSCG00000040980	5.48753	3.94507	17.2141	8.59511e-05	0.0023713	3	4	Up-regulated
Sus_scrofa___FANCA	2.9889	5.34551	16.9615	8.62368e-05	0.00237575	3	4	Up-regulated
Sus_scrofa___SOD2	2.52339	6.83082	16.7465	8.95813e-05	0.00245724	3	4	Up-regulated
Sus_scrofa___WWC1	3.59611	5.24655	16.6103	9.20305e-05	0.00252079	3	4	Up-regulated
Sus_scrofa___VPS37A	2.89964	6.04471	16.8215	9.26629e-05	0.00253388	3	4	Up-regulated
Sus_scrofa___NXT1	3.52775	4.607	16.7296	9.27742e-05	0.00253388	3	4	Up-regulated
Sus_scrofa___ATP8A2	3.89482	5.1218	16.5988	9.39564e-05	0.0025625	3	4	Up-regulated
Sus_scrofa___HSP90AA1	2.51845	7.96566	16.5012	9.96287e-05	0.00268266	3	4	Up-regulated
Sus_scrofa___DRD3	5.37412	4.00068	16.7518	0.000101073	0.00271389	3	4	Up-regulated
Sus_scrofa___H2AFZ	3.26798	4.92056	16.5013	0.000102126	0.00273444	3	4	Up-regulated
Sus_scrofa___FAM171B	3.30434	5.51269	16.347	0.000102694	0.00274581	3	4	Up-regulated
Sus_scrofa___MKNK2	3.00628	6.37859	16.4945	0.000103435	0.00275788	3	4	Up-regulated
Sus_scrofa___PLK4	3.01331	6.47375	16.3679	0.000105524	0.00280574	3	4	Up-regulated
Sus_scrofa___MREG	3.79449	4.46642	16.276	0.000108765	0.00286051	3	4	Up-regulated
Sus_scrofa___SLC10A1	3.1094	5.41316	16.1705	0.000110915	0.00290053	3	4	Up-regulated
Sus_scrofa___TMEM243	2.94741	6.41734	16.2719	0.000111749	0.00291217	3	4	Up-regulated
Sus_scrofa___AKR1D1	2.73972	6.572	16.3312	0.000111818	0.00291217	3	4	Up-regulated
Sus_scrofa___ENSSSCG00000027907	2.86102	5.42977	16.3588	0.000114073	0.00295875	3	4	Up-regulated
Sus_scrofa___JAKMIP3	4.06213	4.94323	16.0068	0.000116867	0.00302301	3	4	Up-regulated
Sus_scrofa___P4HB	2.94923	5.96152	16.0817	0.000117402	0.00303273	3	4	Up-regulated
Sus_scrofa___ENSSSCG00000048873	5.37412	3.95506	16.3724	0.000123982	0.00317261	3	4	Up-regulated
Sus_scrofa___ENSSSCG00000027778	2.68692	6.47746	15.9909	0.000124469	0.00318079	3	4	Up-regulated
Sus_scrofa___DPH5	3.08991	5.8153	15.9508	0.000124875	0.00318279	3	4	Up-regulated
Sus_scrofa___UBB	2.84849	7.64226	16.0534	0.000124881	0.00318279	3	4	Up-regulated
Sus_scrofa___C1orf115	3.68068	4.47331	16.0657	0.000130853	0.003306	3	4	Up-regulated
Sus_scrofa___SLC7A2	2.9309	5.64422	15.9755	0.000131337	0.00331192	3	4	Up-regulated
Sus_scrofa___KBTBD6	3.8906	4.67032	15.9404	0.000131956	0.00331875	3	4	Up-regulated
Sus_scrofa___ENSSSCG00000045115	4.60062	4.05185	16.1221	0.00013384	0.0033577	3	4	Up-regulated
Sus_scrofa___NR1D1	3.95108	4.28043	15.9499	0.000134371	0.00336616	3	4	Up-regulated
Sus_scrofa___SLC25A6	2.78732	5.91146	16.0093	0.000136307	0.00340125	3	4	Up-regulated
Sus_scrofa___ENSSSCG00000047841	4.22098	4.30817	15.9605	0.000136934	0.00340798	3	4	Up-regulated
Sus_scrofa___CDK2AP2	3.1551	4.99612	15.8734	0.000140894	0.0034838	3	4	Up-regulated
Sus_scrofa___BRIX1	2.55542	6.21621	15.742	0.000143129	0.0035238	3	4	Up-regulated
Sus_scrofa___ALB	3.20083	5.33412	15.6857	0.000143226	0.0035238	3	4	Up-regulated
Sus_scrofa___SLC13A1	4.42721	4.45687	15.6382	0.000144088	0.00353526	3	4	Up-regulated
Sus_scrofa___E2F8	3.45085	5.31258	15.7767	0.000148525	0.00362684	3	4	Up-regulated
Sus_scrofa___ATP8B3	3.98655	4.31566	15.7886	0.000149793	0.00365173	3	4	Up-regulated
Sus_scrofa___GADD45G	2.71013	6.89281	15.5104	0.000152719	0.00371403	3	4	Up-regulated
Sus_scrofa___ALKBH5	2.60237	5.82616	15.4651	0.00015799	0.00383197	3	4	Up-regulated
Sus_scrofa___XKR5	4.69414	4.12613	15.7449	0.000158933	0.00383746	3	4	Up-regulated
Sus_scrofa___SYNGR4	4.60062	4.03596	15.7303	0.000158984	0.00383746	3	4	Up-regulated
Sus_scrofa___PIWIL2	4.70115	4.29562	15.5893	0.000159022	0.00383746	3	4	Up-regulated
Sus_scrofa___SV2B	3.71108	4.48157	15.3946	0.000161828	0.00390023	3	4	Up-regulated
Sus_scrofa___GSTT4	5.48066	3.92358	15.7084	0.000165578	0.00396849	3	4	Up-regulated
Sus_scrofa___HEY1	4.15293	4.14418	15.6069	0.000165701	0.00396849	3	4	Up-regulated
Sus_scrofa___ENSSSCG00000043963	4.06452	4.55739	15.3412	0.000166943	0.00398822	3	4	Up-regulated
Sus_scrofa___PHF5A	3.15056	5.04062	15.3885	0.000172709	0.00409453	3	4	Up-regulated
Sus_scrofa___ENSSSCG00000036297	3.3992	4.89775	15.2649	0.000174882	0.00412341	3	4	Up-regulated
Sus_scrofa___NME1	3.35967	5.09607	15.354	0.000174981	0.00412341	3	4	Up-regulated
Sus_scrofa___RPL22L1	2.93799	5.30873	15.3297	0.000177976	0.00415801	3	4	Up-regulated
Sus_scrofa___CDC6	3.17268	5.40438	15.3204	0.000178328	0.00416113	3	4	Up-regulated
Sus_scrofa___ENSSSCG00000031037	3.22294	5.32091	15.1965	0.000180188	0.00419938	3	4	Up-regulated
Sus_scrofa___STMN1	3.37035	4.67374	15.2967	0.000180579	0.0042014	3	4	Up-regulated
Sus_scrofa___POLR1G	3.12906	5.14719	15.1792	0.000180715	0.0042014	3	4	Up-regulated
Sus_scrofa___DCST1	5.26512	3.93885	15.4397	0.00018492	0.00426793	3	4	Up-regulated
Sus_scrofa___VCP	2.62244	6.65671	15.1348	0.000185232	0.00426996	3	4	Up-regulated
Sus_scrofa___COL16A1	3.41918	4.59327	15.1576	0.000185909	0.00428039	3	4	Up-regulated
Sus_scrofa___NOLC1	2.77781	5.87331	15.18	0.000189669	0.00434333	3	4	Up-regulated
Sus_scrofa___COL26A1	3.9998	4.3611	15.1747	0.000192363	0.0043866	3	4	Up-regulated
Sus_scrofa___ENSSSCG00000032060	2.90766	5.30172	15.0474	0.000197935	0.00449754	3	4	Up-regulated
Sus_scrofa___PGP	3.31788	5.27976	15.0925	0.00019863	0.00450796	3	4	Up-regulated
Sus_scrofa___CRYBA1	2.72676	5.70062	15.0056	0.000199341	0.00451246	3	4	Up-regulated
Sus_scrofa___DNAJC6	2.84426	5.34251	14.9065	0.000199463	0.00451246	3	4	Up-regulated
Sus_scrofa___PINX1	2.53969	6.77954	14.9598	0.000199538	0.00451246	3	4	Up-regulated
Sus_scrofa___ENSSSCG00000004511	4.02829	4.38748	14.9437	0.000203382	0.00458308	3	4	Up-regulated
Sus_scrofa___ALYREF	3.34141	5.00404	14.9471	0.000204124	0.004593	3	4	Up-regulated
Sus_scrofa___PTCHD1	4.41213	4.05773	15.0856	0.000204931	0.004593	3	4	Up-regulated
Sus_scrofa___RNF139	2.45432	6.96031	14.9439	0.000205509	0.004593	3	4	Up-regulated
Sus_scrofa___SEZ6	3.53198	4.49228	14.9949	0.000205813	0.00459439	3	4	Up-regulated
Sus_scrofa___ADAMTS4	4.44771	4.16008	15.0639	0.0002064	0.00460212	3	4	Up-regulated
Sus_scrofa___ENSSSCG00000045769	3.08174	6.43235	14.9507	0.000217919	0.00479303	3	4	Up-regulated
Sus_scrofa___BOLL	4.4096	4.57162	14.7427	0.000218011	0.00479303	3	4	Up-regulated
Sus_scrofa___ELAVL3	4.75713	4.309	14.9057	0.000218725	0.00479835	3	4	Up-regulated
Sus_scrofa___USP5	2.82653	5.45269	14.8675	0.00022206	0.00486034	3	4	Up-regulated
Sus_scrofa___NR4A1	3.04023	5.90039	14.7266	0.000225872	0.00492117	3	4	Up-regulated
Sus_scrofa___RAD9A	2.74972	5.37843	14.7155	0.000230842	0.00501227	3	4	Up-regulated
Sus_scrofa___ENSSSCG00000002008	3.38093	5.02696	14.6712	0.000232407	0.00503478	3	4	Up-regulated
Sus_scrofa___NCBP1	2.66226	7.49005	14.6374	0.000238936	0.00516449	3	4	Up-regulated
Sus_scrofa___ZSWIM3	3.65994	4.7554	14.5672	0.000240865	0.0051944	3	4	Up-regulated
Sus_scrofa___FTL	2.73446	7.5696	14.6929	0.000241859	0.00520995	3	4	Up-regulated
Sus_scrofa___CCDC181	3.83276	4.5654	14.6454	0.000242414	0.005216	3	4	Up-regulated
Sus_scrofa___ENSSSCG00000034570	2.65906	7.9016	14.4912	0.000249185	0.00532974	3	4	Up-regulated
Sus_scrofa___PNP	3.32085	5.13955	14.3884	0.000254233	0.00540926	3	4	Up-regulated
Sus_scrofa___TRIB1	3.24695	5.34192	14.5489	0.000255282	0.00542132	3	4	Up-regulated
Papio_anubis_CPQ	5.14565	3.8775	14.7046	0.000256905	0.00544788	3	4	Up-regulated
Sus_scrofa___GPAT4	2.49429	6.67334	14.4423	0.000257686	0.00545837	3	4	Up-regulated
Sus_scrofa___MAPK8IP1	5.06757	3.912	14.584	0.000262738	0.00553462	3	4	Up-regulated
Sus_scrofa___SAMD7	5.06757	3.83809	14.6789	0.000265395	0.00558443	3	4	Up-regulated
Sus_scrofa___TCP1	2.56089	6.47852	14.4344	0.00026996	0.00566797	3	4	Up-regulated
Sus_scrofa___PIM3	2.87028	5.39032	14.3235	0.000271874	0.00570025	3	4	Up-regulated
Sus_scrofa___GADD45A	2.81137	5.33943	14.2238	0.000272095	0.00570025	3	4	Up-regulated
Sus_scrofa___PNOC	3.6864	4.80825	14.2049	0.00027324	0.00571795	3	4	Up-regulated
[truncated: 1,831 more rows]

## Sheet: Vascular EC
Gene	logFC	logCPM	F	PValue	FDR	Observations_Extended	Observations_Control	level
[truncated: 995 more rows]
