# Supplementary material for: Integrated Molecular Profiling of Preclinical and Clinical Cardiac Xenotransplants
Source: Research Square preprint supplement (doi:10.21203/rs.3.rs-8406985/v1), 2026-02-04
Supplement: Supplementary file 20 [file 9904e76bed4e968f3f53b3ce.xlsx]

## Sheet: CM
Gene	logFC	logCPM	F	PValue	FDR	Observations_Rejection	Observations_Standard	level
Sus_scrofa___DIO2	4.09323	3.72975	58.5435	4.07291e-08	0.0013887	4	7	Up-regulated
Sus_scrofa___DNAJB9	1.99296	4.0092	54.1714	8.14995e-08	0.0013894	4	7	Up-regulated
Sus_scrofa___EIF4EBP1	1.89156	3.71693	47.5502	2.54963e-07	0.00289774	4	7	Up-regulated
Sus_scrofa___ZNF395	1.09768	6.64958	42.1661	6.97996e-07	0.00594972	4	7	Up-regulated
Sus_scrofa___ENO1	1.42713	7.13248	38.4866	1.45909e-06	0.00967902	4	7	Up-regulated
Sus_scrofa___GLP1R	2.52203	2.28584	37.789	1.70325e-06	0.00967902	4	7	Up-regulated
Sus_scrofa___B4GAT1	3.70834	-0.879455	31.1969	2.71395e-06	0.0106233	4	7	Up-regulated
Sus_scrofa___ANO6	3.47879	5.91698	35.4175	2.79706e-06	0.0106233	4	7	Up-regulated
Sus_scrofa___ENSSSCG00000033720	2.28616	1.96503	35.0385	3.07532e-06	0.0106233	4	7	Up-regulated
Sus_scrofa___HELB	1.54463	4.42498	34.9163	3.11571e-06	0.0106233	4	7	Up-regulated
Sus_scrofa___UPP1	2.75223	2.49394	33.9261	3.9424e-06	0.01222	4	7	Up-regulated
Sus_scrofa___UFM1	1.08275	5.3039	31.7994	6.27874e-06	0.01784	4	7	Up-regulated
Sus_scrofa___TRIB3	3.39072	2.12132	30.7127	8.24399e-06	0.0188517	4	7	Up-regulated
Sus_scrofa___ENSSSCG00000013880	3.10447	4.19719	30.6136	8.29353e-06	0.0188517	4	7	Up-regulated
Sus_scrofa___PLOD1	1.39647	4.59576	30.1699	9.2041e-06	0.0196139	4	7	Up-regulated
Sus_scrofa___ENSSSCG00000038337	3.85033	-0.249625	26.1236	1.63176e-05	0.0309093	4	7	Up-regulated
Sus_scrofa___ERO1B	1.20673	4.75599	27.4335	1.797e-05	0.0309484	4	7	Up-regulated
Sus_scrofa___TRAF3IP2	1.08494	6.62382	26.8414	2.08667e-05	0.0309484	4	7	Up-regulated
Sus_scrofa___BACE2	1.27664	7.06471	26.8179	2.09916e-05	0.0309484	4	7	Up-regulated
Sus_scrofa___HAMP	2.37849	-1.03054	25.2144	2.1009e-05	0.0309484	4	7	Up-regulated
Sus_scrofa___ATF5	2.15529	2.94412	26.5409	2.25631e-05	0.0309484	4	7	Up-regulated
Sus_scrofa___H1-3	2.55058	3.38247	26.4164	2.33313e-05	0.0309484	4	7	Up-regulated
Sus_scrofa___ENSSSCG00000049087	3.14931	-1.73097	22.9811	2.48722e-05	0.0309484	4	7	Up-regulated
Sus_scrofa___NIPAL2	2.56423	3.14946	26.0821	2.53808e-05	0.0309484	4	7	Up-regulated
Sus_scrofa___P4HB	1.29716	3.69531	26.0726	2.54152e-05	0.0309484	4	7	Up-regulated
Sus_scrofa___SNAPC1	1.25304	7.37867	25.8039	2.72355e-05	0.0310379	4	7	Up-regulated
Sus_scrofa___CTSV	1.82734	3.43922	25.7955	2.73093e-05	0.0310379	4	7	Up-regulated
Sus_scrofa___IGF2BP2	1.27393	6.83515	25.3304	3.08144e-05	0.0338919	4	7	Up-regulated
Sus_scrofa___DDIT4	2.91445	4.68353	23.9551	4.44315e-05	0.0447285	4	7	Up-regulated
Sus_scrofa___SSR3	1.11844	5.62625	23.8158	4.61179e-05	0.0449268	4	7	Up-regulated
Papio_anubis_PPP3CB	-4.90068	-0.141583	29.224	7.59174e-06	0.0188517	4	7	Down-regulated
Sus_scrofa___SMTN	-1.61589	5.57524	27.9519	1.57874e-05	0.0309093	4	7	Down-regulated
Papio_anubis_RAB3IP	-4.63652	-1.50413	26.2939	1.88388e-05	0.0309484	4	7	Down-regulated
Papio_anubis_ENSPANG00000026399	-4.19686	1.91094	23.6576	4.13673e-05	0.0440768	4	7	Down-regulated
Papio_anubis_USP15	-4.75599	1.75073	23.2235	4.46026e-05	0.0447285	4	7	Down-regulated

## Sheet: Endocardial lymphatic EC
Gene	logFC	logCPM	F	PValue	FDR	Observations_Rejection	Observations_Standard	level
Sus_scrofa___PAPPA	3.10552	6.45837	33.1743	1.34307e-06	0.0148815	4	7	Up-regulated
Sus_scrofa___KCNMA1	3.96436	6.28936	30.888	1.79185e-06	0.0148815	4	7	Up-regulated
Sus_scrofa___FN1	2.32537	7.37871	32.133	2.35268e-06	0.0148815	4	7	Up-regulated
Sus_scrofa___NCAM1	4.48165	7.53702	28.6779	5.15177e-06	0.0189275	4	7	Up-regulated
Sus_scrofa___CD163	4.86214	6.00635	28.0098	6.29161e-06	0.0189275	4	7	Up-regulated
Sus_scrofa___PDK4	4.16601	6.83706	27.0588	6.87467e-06	0.0189275	4	7	Up-regulated
Sus_scrofa___FAM155A	4.35229	5.59315	26.1667	6.98212e-06	0.0189275	4	7	Up-regulated
Sus_scrofa___LRRTM3	5.3669	6.17591	25.469	9.5976e-06	0.0227655	4	7	Up-regulated
Sus_scrofa___LMNTD1	4.05196	7.54821	25.7329	1.25863e-05	0.0249643	4	7	Up-regulated
Sus_scrofa___TECRL	4.95479	6.62347	25.0592	1.43805e-05	0.0249643	4	7	Up-regulated
Sus_scrofa___PLEKHM3	3.93426	5.38095	23.9546	1.44713e-05	0.0249643	4	7	Up-regulated
Sus_scrofa___SLCO6A1	5.15505	5.54035	22.5246	2.84012e-05	0.0449118	4	7	Up-regulated

## Sheet: Fibroblasts
Gene	logFC	logCPM	F	PValue	FDR	Observations_Rejection	Observations_Standard	level
Sus_scrofa___GABRA2	4.89188	3.31419	59.9221	2.71639e-09	7.51353e-05	4	7	Up-regulated
Sus_scrofa___DGKI	3.64517	5.29505	41.1856	4.35984e-07	0.00345101	4	7	Up-regulated
Sus_scrofa___CXCL14	4.61855	3.26096	37.8514	7.11429e-07	0.00393563	4	7	Up-regulated
Sus_scrofa___CDCP1	5.43828	2.78207	33.9517	1.33369e-06	0.00472008	4	7	Up-regulated
Sus_scrofa___ACTG2	5.16937	2.82866	31.7689	1.83637e-06	0.00472008	4	7	Up-regulated
Sus_scrofa___GNAO1	3.15088	3.44962	32.6471	1.94577e-06	0.00472008	4	7	Up-regulated
Sus_scrofa___GPM6B	1.40067	8.22265	36.3181	2.04776e-06	0.00472008	4	7	Up-regulated
Sus_scrofa___TMPRSS11F	5.08131	3.27523	29.6424	2.83495e-06	0.00559564	4	7	Up-regulated
Sus_scrofa___CHST11	2.44325	8.8781	34.5191	3.04732e-06	0.00559564	4	7	Up-regulated
Sus_scrofa___CEMIP	6.31392	7.23996	33.9277	3.23542e-06	0.00559564	4	7	Up-regulated
Sus_scrofa___ADAMTS6	2.97947	7.59603	34.2866	3.23682e-06	0.00559564	4	7	Up-regulated
Sus_scrofa___PAPPA	2.19897	8.76065	33.5835	3.76104e-06	0.0059836	4	7	Up-regulated
Sus_scrofa___ENSSSCG00000026043	5.8218	3.02688	32.0553	3.89388e-06	0.0059836	4	7	Up-regulated
Sus_scrofa___TIMP1	2.65605	6.29703	31.5872	5.55067e-06	0.00731102	4	7	Up-regulated
Sus_scrofa___LCK	3.7841	1.92119	26.9329	6.38293e-06	0.00767617	4	7	Up-regulated
Sus_scrofa___ELL2	2.92307	6.11741	30.5037	6.89857e-06	0.0079506	4	7	Up-regulated
Sus_scrofa___ENSSSCG00000010370	3.69708	3.12992	27.0544	8.07788e-06	0.00854885	4	7	Up-regulated
Sus_scrofa___ENSSSCG00000009293	1.93639	7.44499	30.1709	8.38647e-06	0.00854885	4	7	Up-regulated
Sus_scrofa___CHSY3	1.60518	9.41393	30.0452	8.63003e-06	0.00854885	4	7	Up-regulated
Sus_scrofa___ANPEP	2.62198	5.08964	28.4821	8.96301e-06	0.00854885	4	7	Up-regulated
Sus_scrofa___GLIS3	1.02773	9.08082	29.6515	9.49796e-06	0.00875712	4	7	Up-regulated
Sus_scrofa___ENSSSCG00000047553	3.55292	6.9883	29.2563	1.05687e-05	0.00913534	4	7	Up-regulated
Sus_scrofa___NDRG1	1.58953	7.19711	28.8775	1.15049e-05	0.00963938	4	7	Up-regulated
Sus_scrofa___ENSSSCG00000006719	2.80624	2.69166	25.7553	1.2115e-05	0.00963938	4	7	Up-regulated
Sus_scrofa___PPP4R4	2.03368	3.26866	26.9302	1.21973e-05	0.00963938	4	7	Up-regulated
Sus_scrofa___FNDC1	4.72436	5.47219	27.2568	1.42179e-05	0.0101365	4	7	Up-regulated
Sus_scrofa___GCNT1	2.62644	4.12429	27.7775	1.50252e-05	0.0101365	4	7	Up-regulated
Sus_scrofa___CCDC83	3.72186	2.78843	24.2247	1.54233e-05	0.0101573	4	7	Up-regulated
Sus_scrofa___FER1L6	4.2189	2.90503	24.4559	1.64374e-05	0.0102991	4	7	Up-regulated
Sus_scrofa___FOXP1	1.18783	10.2871	27.3768	1.67557e-05	0.0102991	4	7	Up-regulated
Sus_scrofa___SLC2A5	3.32635	1.88241	24.4292	1.84365e-05	0.0108047	4	7	Up-regulated
Sus_scrofa___CHSY1	1.37277	7.27934	26.9411	1.87501e-05	0.0108047	4	7	Up-regulated
Sus_scrofa___MYBL1	3.09924	3.5655	25.0942	2.10487e-05	0.010985	4	7	Up-regulated
Sus_scrofa___ENSSSCG00000039222	2.4447	5.32861	26.4127	2.18286e-05	0.0111811	4	7	Up-regulated
Sus_scrofa___KCNMA1	3.56339	8.05189	25.9929	2.40113e-05	0.0120755	4	7	Up-regulated
Sus_scrofa___SORT1	4.19179	2.7818	22.9037	2.50115e-05	0.0120843	4	7	Up-regulated
Sus_scrofa___DDAH1	2.89019	6.33363	25.827	2.53395e-05	0.0120843	4	7	Up-regulated
Sus_scrofa___ENSSSCG00000013869	2.7788	4.08534	24.9969	2.81756e-05	0.0129294	4	7	Up-regulated
Sus_scrofa___CCSER2	1.00576	7.31938	25.2961	2.88302e-05	0.0129294	4	7	Up-regulated
Sus_scrofa___ZGRF1	1.86884	3.60906	25.0121	2.89813e-05	0.0129294	4	7	Up-regulated
Sus_scrofa___GBE1	1.25819	8.13547	24.9701	3.14481e-05	0.0138072	4	7	Up-regulated
Sus_scrofa___DAB1	3.97756	3.69096	23.4006	3.20254e-05	0.013841	4	7	Up-regulated
Sus_scrofa___SV2B	2.59182	3.67812	23.9544	3.41666e-05	0.0145392	4	7	Up-regulated
Sus_scrofa___ARL4C	5.44103	2.44484	25.2617	3.50127e-05	0.0146735	4	7	Up-regulated
Sus_scrofa___SLC35B4	2.5609	3.72148	22.8538	3.80107e-05	0.0151988	4	7	Up-regulated
Sus_scrofa___MFSD13A	2.50299	3.13465	22.3546	3.90153e-05	0.0151988	4	7	Up-regulated
Sus_scrofa___FN1	2.0988	9.75066	24.0603	4.01884e-05	0.0151988	4	7	Up-regulated
Sus_scrofa___OGDH	1.73555	6.28356	24.0557	4.05257e-05	0.0151988	4	7	Up-regulated
Sus_scrofa___UBE2E2	0.934376	9.43583	23.9042	4.19376e-05	0.0151988	4	7	Up-regulated
Sus_scrofa___HGF	2.29321	7.09169	23.8213	4.31023e-05	0.0152847	4	7	Up-regulated
Sus_scrofa___FARP1	1.2593	9.34367	23.2543	5.01657e-05	0.0167179	4	7	Up-regulated
Sus_scrofa___ENSSSCG00000035544	1.03346	6.42559	23.0009	5.41492e-05	0.0175561	4	7	Up-regulated
Sus_scrofa___ENSSSCG00000016629	1.79618	8.65651	22.9518	5.45853e-05	0.0175561	4	7	Up-regulated
Sus_scrofa___YWHAH	1.72076	3.5506	22.2802	5.82035e-05	0.0176548	4	7	Up-regulated
Sus_scrofa___KIT	2.32159	6.50826	22.7286	5.83311e-05	0.0176548	4	7	Up-regulated
Sus_scrofa___FGFR2	1.84954	7.3931	22.7234	5.84792e-05	0.0176548	4	7	Up-regulated
Sus_scrofa___SULF1	1.2276	9.61113	22.6304	5.97194e-05	0.0176548	4	7	Up-regulated
Sus_scrofa___CA12	2.30819	6.06772	22.6126	6.06309e-05	0.0176548	4	7	Up-regulated
Sus_scrofa___ENSSSCG00000031462	1.23	8.00594	22.5104	6.17932e-05	0.0176548	4	7	Up-regulated
Sus_scrofa___PHKA2	2.56355	2.91091	20.9383	6.26154e-05	0.0176548	4	7	Up-regulated
Sus_scrofa___CORIN	4.98306	6.36399	22.4223	6.31198e-05	0.0176548	4	7	Up-regulated
Sus_scrofa___ARNTL2	2.02518	6.62832	22.4443	6.31896e-05	0.0176548	4	7	Up-regulated
Sus_scrofa___DIAPH3	2.6108	5.79676	22.3276	6.57178e-05	0.0177839	4	7	Up-regulated
Sus_scrofa___SMPDL3B	4.03253	2.13681	20.8344	6.65729e-05	0.0177839	4	7	Up-regulated
Sus_scrofa___ACKR4	1.83694	4.75971	22.0678	6.74144e-05	0.0177839	4	7	Up-regulated
Sus_scrofa___HERC4	0.977766	7.76369	22.1974	6.75096e-05	0.0177839	4	7	Up-regulated
Sus_scrofa___GPC1	4.16967	3.08587	19.468	8.64978e-05	0.0215543	4	7	Up-regulated
Sus_scrofa___BAG3	1.55794	5.32566	20.9905	9.02478e-05	0.0222717	4	7	Up-regulated
Sus_scrofa___MFHAS1	1.59559	6.91126	21.1623	9.0987e-05	0.0222717	4	7	Up-regulated
Sus_scrofa___BNC2	0.852952	10.8324	20.9214	9.7476e-05	0.0232716	4	7	Up-regulated
Sus_scrofa___GYG1	2.79756	3.87528	20.2538	9.83978e-05	0.0232716	4	7	Up-regulated
Sus_scrofa___ENSSSCG00000034610	3.43768	6.10758	20.8235	0.000100308	0.0235019	4	7	Up-regulated
Sus_scrofa___HS3ST2	2.94228	3.07076	19.5296	0.00010134	0.0235019	4	7	Up-regulated
Sus_scrofa___TRHDE	3.34467	4.27951	20.2648	0.000104118	0.0235019	4	7	Up-regulated
Sus_scrofa___TMEM65	2.03618	6.33389	20.6977	0.000104509	0.0235019	4	7	Up-regulated
Sus_scrofa___LOX	1.41278	5.61192	20.6349	0.000106709	0.023803	4	7	Up-regulated
Sus_scrofa___CYSLTR2	2.23541	4.40988	20.5281	0.000111273	0.0242701	4	7	Up-regulated
Sus_scrofa___OSBPL3	3.69741	5.26735	20.4368	0.000113315	0.0244867	4	7	Up-regulated
Sus_scrofa___RAI14	1.71291	9.3013	20.2401	0.000119148	0.0255475	4	7	Up-regulated
Sus_scrofa___PMCH	2.89949	1.69136	18.1473	0.000128798	0.0267861	4	7	Up-regulated
Sus_scrofa___RNF122	3.44379	2.6139	17.9928	0.000130016	0.0268376	4	7	Up-regulated
Sus_scrofa___PLAT	2.17631	6.78876	19.8409	0.000134419	0.026998	4	7	Up-regulated
Sus_scrofa___ANKH	4.05316	5.63462	19.2899	0.000134697	0.026998	4	7	Up-regulated
Sus_scrofa___INHBA	3.60981	3.11564	18.1592	0.00013584	0.0270312	4	7	Up-regulated
Sus_scrofa___ASXL3	3.31161	3.34557	18.5444	0.000139612	0.0275833	4	7	Up-regulated
Sus_scrofa___ENSSSCG00000007188	1.29434	6.14267	19.6879	0.000141134	0.0276862	4	7	Up-regulated
Sus_scrofa___WFDC1	2.73543	6.3901	19.6188	0.000144612	0.0277201	4	7	Up-regulated
Sus_scrofa___TTC23	1.94681	4.27857	19.0567	0.000147314	0.0277201	4	7	Up-regulated
Sus_scrofa___RHOQ	2.24337	6.53202	19.4777	0.000150381	0.0279164	4	7	Up-regulated
Sus_scrofa___UBE2H	1.12874	8.49371	19.3278	0.000156658	0.0284451	4	7	Up-regulated
Sus_scrofa___COL4A3	2.88082	1.94458	17.1989	0.000160837	0.0287484	4	7	Up-regulated
Sus_scrofa___SPIDR	1.13175	7.87332	19.2077	0.000162508	0.0287484	4	7	Up-regulated
Sus_scrofa___ENSSSCG00000002260	1.35562	8.00452	19.1942	0.000163178	0.0287484	4	7	Up-regulated
Sus_scrofa___CREM	1.72744	4.03671	19.0281	0.000168316	0.0292806	4	7	Up-regulated
Sus_scrofa___FKBP1B	6.27278	1.92793	19.7643	0.000170783	0.0295241	4	7	Up-regulated
Sus_scrofa___CD44	2.46808	6.33168	18.8488	0.000182082	0.0307106	4	7	Up-regulated
Sus_scrofa___DDIT4	2.64719	6.81792	18.8476	0.000182087	0.0307106	4	7	Up-regulated
Sus_scrofa___HEPHL1	3.22505	1.67546	16.8791	0.000189671	0.031445	4	7	Up-regulated
Sus_scrofa___ENSSSCG00000039009	3.07902	5.11872	18.6567	0.000194934	0.0320945	4	7	Up-regulated
Sus_scrofa___GYG2	1.84871	5.2664	18.6004	0.000196965	0.032237	4	7	Up-regulated
Sus_scrofa___ADTRP	3.00476	1.91192	16.692	0.000201199	0.0323609	4	7	Up-regulated
Sus_scrofa___RASSF9	2.42298	5.36351	18.4507	0.00020719	0.0324913	4	7	Up-regulated
Sus_scrofa___RASSF8	0.872491	8.22655	18.4088	0.000207667	0.0324913	4	7	Up-regulated
Sus_scrofa___P4HA3	3.27928	1.83841	16.5367	0.000220257	0.0330822	4	7	Up-regulated
Sus_scrofa___PTX3	2.33384	6.88461	18.0421	0.000226824	0.0330822	4	7	Up-regulated
Sus_scrofa___STK38L	2.5614	7.13133	18.0983	0.00022945	0.0330822	4	7	Up-regulated
Sus_scrofa___MMD	4.58632	4.94483	17.625	0.000230109	0.0330822	4	7	Up-regulated
Sus_scrofa___TRPC4	2.49162	3.20836	17.1328	0.000231556	0.0330822	4	7	Up-regulated
Sus_scrofa___UHRF1	2.25397	2.75733	16.5692	0.000233226	0.0330822	4	7	Up-regulated
Sus_scrofa___ENSSSCG00000031706	2.58853	4.21239	17.8226	0.000236485	0.0333734	4	7	Up-regulated
Sus_scrofa___CTSL	4.23056	1.9657	17.7867	0.000242195	0.0334956	4	7	Up-regulated
Sus_scrofa___RIMS1	4.27174	3.75612	16.7666	0.000243514	0.0335105	4	7	Up-regulated
Sus_scrofa___NCAM1	2.85564	7.48422	17.7565	0.000254807	0.0345488	4	7	Up-regulated
Sus_scrofa___ENSSSCG00000004387	1.23427	9.77283	17.6654	0.000262016	0.0348124	4	7	Up-regulated
Sus_scrofa___GATA6	2.19511	5.03635	17.6387	0.000262793	0.0348124	4	7	Up-regulated
Sus_scrofa___LURAP1L	1.52312	5.71988	17.642	0.000265079	0.0349147	4	7	Up-regulated
Sus_scrofa___SERTAD2	1.13273	6.57428	17.466	0.000279317	0.0354397	4	7	Up-regulated
Sus_scrofa___ENSSSCG00000043603	4.78423	0.999512	17.2367	0.000279388	0.0354397	4	7	Up-regulated
Sus_scrofa___ARAP2	1.80373	5.69035	17.4843	0.000279389	0.0354397	4	7	Up-regulated
Sus_scrofa___PRL	2.72205	2.33015	15.9215	0.000279769	0.0354397	4	7	Up-regulated
Sus_scrofa___CD163	4.0438	4.77484	16.1045	0.000296342	0.0365929	4	7	Up-regulated
Sus_scrofa___HHAT	1.16019	6.53353	17.1988	0.000304192	0.0372298	4	7	Up-regulated
Sus_scrofa___EVA1A	2.19867	3.8609	17.0213	0.000307056	0.0372848	4	7	Up-regulated
Sus_scrofa___ENSSSCG00000044539	3.24149	2.29694	15.9586	0.000310675	0.0375252	4	7	Up-regulated
Sus_scrofa___PLOD2	0.881555	10.2956	17.0945	0.000314177	0.0377833	4	7	Up-regulated
Sus_scrofa___VCAN	1.42757	9.8705	17.0515	0.000318544	0.0381426	4	7	Up-regulated
Sus_scrofa___ENSSSCG00000049691	1.49414	9.13153	17.0101	0.000322809	0.0383215	4	7	Up-regulated
Sus_scrofa___ENAH	1.60867	7.27014	16.9208	0.000332679	0.0385067	4	7	Up-regulated
Sus_scrofa___F13A1	4.28711	3.96223	16.2135	0.000336271	0.0387552	4	7	Up-regulated
Sus_scrofa___CDCA7L	2.56219	3.4437	15.9478	0.000345568	0.0396444	4	7	Up-regulated
Sus_scrofa___GUCA1B	2.20292	3.56701	16.3857	0.000348204	0.0396444	4	7	Up-regulated
Sus_scrofa___PLEKHH1	3.13538	1.90993	15.468	0.000349361	0.0396444	4	7	Up-regulated
Sus_scrofa___RIPOR2	2.97609	4.419	16.4448	0.000351153	0.0396444	4	7	Up-regulated
Sus_scrofa___ADGRG2	2.32096	3.48664	16.4225	0.000352913	0.0396812	4	7	Up-regulated
Sus_scrofa___TSC22D1	1.00511	7.48046	16.7008	0.000356739	0.0398197	4	7	Up-regulated
Sus_scrofa___POSTN	2.49899	8.78878	16.6978	0.000357024	0.0398197	4	7	Up-regulated
Sus_scrofa___GPC6	1.27901	10.2031	16.6265	0.000365326	0.0404197	4	7	Up-regulated
Sus_scrofa___ENSSSCG00000032422	1.78104	4.12954	16.5372	0.000370522	0.0406054	4	7	Up-regulated
Sus_scrofa___ENSSSCG00000016255	3.57744	2.9168	15.5508	0.000375387	0.0408787	4	7	Up-regulated
Sus_scrofa___DCDC1	1.12952	4.44705	16.4267	0.000383118	0.0412336	4	7	Up-regulated
Sus_scrofa___RAMP1	3.23607	4.1835	16.2055	0.000390842	0.0415796	4	7	Up-regulated
Sus_scrofa___BMP3	3.25696	2.92518	15.1948	0.000400429	0.0421135	4	7	Up-regulated
Sus_scrofa___CCND3	1.42925	9.5317	16.3078	0.000405269	0.0424404	4	7	Up-regulated
Sus_scrofa___ANLN	2.24926	4.06253	16.1702	0.000411548	0.0426757	4	7	Up-regulated
Sus_scrofa___CSDC2	2.03557	3.35196	15.6728	0.000434935	0.044067	4	7	Up-regulated
Sus_scrofa___NDC80	2.59764	2.98637	15.1221	0.000445779	0.0447879	4	7	Up-regulated
Sus_scrofa___PXK	0.849382	7.37195	15.9528	0.000455535	0.0451617	4	7	Up-regulated
Sus_scrofa___ENSSSCG00000005959	1.45668	5.51211	15.8838	0.000468724	0.0461385	4	7	Up-regulated
Sus_scrofa___MCFD2	1.80951	5.37504	15.7394	0.000493188	0.0476487	4	7	Up-regulated
Sus_scrofa___LRRC7	3.01821	2.98338	14.5209	0.000536508	0.049629	4	7	Up-regulated
Sus_scrofa___PTPRC	1.87641	5.58643	15.4661	0.0005392	0.049629	4	7	Up-regulated
Sus_scrofa___ENSSSCG00000007692	1.4508	5.26452	15.4677	0.000539645	0.049629	4	7	Up-regulated
Sus_scrofa___RGS10	2.49479	2.40706	14.4214	0.000540114	0.049629	4	7	Up-regulated
Sus_scrofa___ENSSSCG00000050709	2.32696	2.3601	14.4697	0.000544582	0.049629	4	7	Up-regulated
Sus_scrofa___GTF2A1L	1.24247	7.14396	15.4136	0.000545016	0.049629	4	7	Up-regulated
Sus_scrofa___JAK2	0.80101	9.24915	15.4098	0.000545452	0.049629	4	7	Up-regulated
Sus_scrofa___PARPBP	1.50109	4.57978	15.39	0.000552293	0.0498122	4	7	Up-regulated
Sus_scrofa___DPYSL3	1.6965	7.88657	15.3701	0.000552868	0.0498122	4	7	Up-regulated
Sus_scrofa___GPD2	1.35878	6.18221	15.3707	0.000554703	0.0498152	4	7	Up-regulated
Sus_scrofa___CA10	-3.03248	7.46063	63.3411	1.59509e-08	0.000220601	4	7	Down-regulated
Sus_scrofa___TMEFF2	-2.72096	7.89182	43.2074	4.99061e-07	0.00345101	4	7	Down-regulated
Papio_anubis_CNOT6L	-6.49285	2.34231	38.5496	1.42959e-06	0.00472008	4	7	Down-regulated
Papio_anubis_PPP3CB	-5.50012	2.00498	35.6162	1.66236e-06	0.00472008	4	7	Down-regulated
Papio_anubis_AKT3	-5.14528	2.2831	34.4406	1.80559e-06	0.00472008	4	7	Down-regulated
Papio_anubis_PUM2	-5.75755	1.79798	29.9142	5.25059e-06	0.00728331	4	7	Down-regulated
Papio_anubis_RBPJ	-5.38521	3.53471	29.3063	5.26632e-06	0.00728331	4	7	Down-regulated
Sus_scrofa___BMP5	-4.60234	4.17069	29.5336	6.0202e-06	0.00756903	4	7	Down-regulated
Sus_scrofa___LVRN	-2.33525	6.03227	29.9479	8.8724e-06	0.00854885	4	7	Down-regulated
Papio_anubis_TAF15	-4.57342	1.77068	26.8356	1.03983e-05	0.00913534	4	7	Down-regulated
Papio_anubis_CHD2	-6.51311	2.38449	27.5612	1.2873e-05	0.00989075	4	7	Down-regulated
Sus_scrofa___MROH9	-2.70054	3.7689	27.9985	1.41013e-05	0.0101365	4	7	Down-regulated
Papio_anubis_CPSF6	-4.44344	1.93861	25.8857	1.44207e-05	0.0101365	4	7	Down-regulated
Sus_scrofa___ITIH5	-2.29058	8.16948	27.8624	1.48161e-05	0.0101365	4	7	Down-regulated
Papio_anubis_MIER1	-3.56315	2.07969	24.4666	1.6137e-05	0.0102991	4	7	Down-regulated
Papio_anubis_TCERG1	-4.21967	1.55987	25.5923	1.78951e-05	0.0107604	4	7	Down-regulated
Papio_anubis_NKTR	-2.49524	3.06026	26.4603	1.91819e-05	0.010828	4	7	Down-regulated
Papio_anubis_ATAD2B	-4.2147	1.91551	23.8713	2.01445e-05	0.0108337	4	7	Down-regulated
Papio_anubis_PPM1B	-4.15041	1.27938	24.7952	2.016e-05	0.0108337	4	7	Down-regulated
Papio_anubis_CLINT1	-3.02672	2.33934	24.6625	2.0367e-05	0.0108337	4	7	Down-regulated
Papio_anubis_TLK1	-5.49056	1.42752	24.3533	2.522e-05	0.0120843	4	7	Down-regulated
Papio_anubis_SEPTIN7	-2.76977	2.80517	24.6587	2.71287e-05	0.0127183	4	7	Down-regulated
Papio_anubis_ENSPANG00000026399	-6.91601	2.20594	25.0506	3.64311e-05	0.0149725	4	7	Down-regulated
Papio_anubis_KMT2E	-5.82875	2.08544	23.758	3.68086e-05	0.0149725	4	7	Down-regulated
Papio_anubis_PHF20	-3.77583	1.96961	21.4931	4.02514e-05	0.0151988	4	7	Down-regulated
Papio_anubis_ELF2	-5.22231	1.27072	22.7712	4.16801e-05	0.0151988	4	7	Down-regulated
Papio_anubis_ZNF207	-5.18904	2.23789	22.923	4.17392e-05	0.0151988	4	7	Down-regulated
Papio_anubis_GLS	-4.66764	1.61413	21.9471	4.23106e-05	0.0151988	4	7	Down-regulated
Papio_anubis_BAZ2B	-4.65634	1.73455	22.2592	4.59089e-05	0.0158852	4	7	Down-regulated
Papio_anubis_ELMO1	-5.5057	2.14642	22.2786	4.59443e-05	0.0158852	4	7	Down-regulated
Papio_anubis_ZRANB2	-2.22823	3.18437	23.2403	4.88732e-05	0.0166027	4	7	Down-regulated
Papio_anubis_FCHO2	-4.4058	2.01131	22.1524	4.92198e-05	0.0166027	4	7	Down-regulated
Papio_anubis_DIAPH2	-2.88045	3.8542	23.2048	5.14196e-05	0.0169317	4	7	Down-regulated
Sus_scrofa___ENSSSCG00000035525	-1.82144	4.41444	22.7535	5.6906e-05	0.0176548	4	7	Down-regulated
Papio_anubis_TMSB4X	-5.68647	1.21734	24.7897	5.72999e-05	0.0176548	4	7	Down-regulated
Sus_scrofa___VIT	-3.07325	5.24511	22.6577	5.99644e-05	0.0176548	4	7	Down-regulated
Papio_anubis_TBC1D15	-3.9517	1.32151	21.1725	6.11547e-05	0.0176548	4	7	Down-regulated
Papio_anubis_HERC1	-4.53131	2.20256	22.4159	6.3829e-05	0.0176551	4	7	Down-regulated
Sus_scrofa___FRMD3	-1.92574	8.48997	22.2712	6.61007e-05	0.0177839	4	7	Down-regulated
Papio_anubis_QKI	-4.96224	2.49423	21.4737	7.40584e-05	0.0191568	4	7	Down-regulated
Papio_anubis_STAG1	-6.07071	1.92891	22.3609	7.41063e-05	0.0191568	4	7	Down-regulated
Papio_anubis_ENSPANG00000005380	-3.92824	1.24087	19.9835	7.56691e-05	0.0193797	4	7	Down-regulated
Papio_anubis_SCAF4	-2.69241	1.82719	19.5931	7.75004e-05	0.0195342	4	7	Down-regulated
Papio_anubis_UBR3	-4.02937	1.63443	20.28	7.76849e-05	0.0195342	4	7	Down-regulated
Sus_scrofa___ABCA9	-1.49752	8.00712	21.0642	9.3516e-05	0.0226899	4	7	Down-regulated
Sus_scrofa___GPC5	-2.93534	8.39863	20.8341	9.84372e-05	0.0232716	4	7	Down-regulated
Papio_anubis_ACAP2	-5.8899	1.94556	19.9699	0.000102844	0.0235019	4	7	Down-regulated
Papio_anubis_RPS6KB1	-4.4513	1.91271	19.5331	0.000104244	0.0235019	4	7	Down-regulated
Papio_anubis_LUC7L3	-5.54999	1.82269	19.7081	0.000111114	0.0242701	4	7	Down-regulated
Papio_anubis_ZNF292	-4.10074	2.20602	19.0268	0.000111436	0.0242701	4	7	Down-regulated
Papio_anubis_USP15	-4.00695	2.41936	18.6798	0.000121075	0.0257611	4	7	Down-regulated
Papio_anubis_PTPRC	-6.7127	1.91496	21.9099	0.000122052	0.0257707	4	7	Down-regulated
Papio_anubis_USP47	-5.35688	1.23778	19.4705	0.000125186	0.0262322	4	7	Down-regulated
Papio_anubis_PIAS1	-4.87801	2.08248	18.8783	0.000131583	0.0269598	4	7	Down-regulated
Papio_anubis_PPP4R2	-4.11592	1.29101	18.4596	0.000133582	0.026998	4	7	Down-regulated
Papio_anubis_MBNL1	-6.59723	1.9432	19.918	0.00014296	0.0277201	4	7	Down-regulated
Papio_anubis_PRPF38B	-3.84554	0.71568	18.665	0.000143401	0.0277201	4	7	Down-regulated
Papio_anubis_ZEB2	-4.9788	2.33093	18.3489	0.00014778	0.0277201	4	7	Down-regulated
Papio_anubis_DOCK1	-3.90618	1.2564	18.1685	0.000148321	0.0277201	4	7	Down-regulated
Sus_scrofa___ARL14EPL	-4.83922	1.08112	17.9495	0.000148322	0.0277201	4	7	Down-regulated
Papio_anubis_TBC1D5	-6.21788	1.49305	21.3345	0.000152653	0.0281493	4	7	Down-regulated
Sus_scrofa___SLC46A3	-1.93676	6.53926	19.3557	0.000155698	0.0284451	4	7	Down-regulated
Papio_anubis_STAG2	-3.41861	1.85066	17.7291	0.000157343	0.0284451	4	7	Down-regulated
Papio_anubis_RAB2A	-4.16647	1.78254	17.8481	0.000163728	0.0287484	4	7	Down-regulated
Sus_scrofa___CDKL1	-1.25836	6.77276	19.1744	0.000164217	0.0287484	4	7	Down-regulated
Papio_anubis_XRN1	-4.52353	2.31069	17.8985	0.000174038	0.0298999	4	7	Down-regulated
Papio_anubis_CEP170	-5.96928	1.87884	19.1122	0.00018	0.0307106	4	7	Down-regulated
Papio_anubis_MACF1	-3.28456	2.7909	17.9633	0.000183793	0.0308104	4	7	Down-regulated
Papio_anubis_DNAJC2	-4.46645	1.0775	17.1297	0.000189853	0.031445	4	7	Down-regulated
Papio_anubis_ASAP1	-4.40924	1.45598	18.492	0.000201112	0.0323609	4	7	Down-regulated
Papio_anubis_GAS7	-5.41127	1.50384	19.5636	0.000201232	0.0323609	4	7	Down-regulated
Sus_scrofa___ENSSSCG00000048509	-4.19661	0.979487	16.7484	0.000205614	0.0324913	4	7	Down-regulated
Papio_anubis_DDX3X	-3.8258	1.62075	17.5795	0.000206975	0.0324913	4	7	Down-regulated
Papio_anubis_DDX6	-4.28895	1.45966	16.9574	0.000207916	0.0324913	4	7	Down-regulated
Papio_anubis_ARID5B	-4.64478	1.98962	17.5376	0.000215858	0.0330822	4	7	Down-regulated
Papio_anubis_FAM172A	-5.83467	1.50995	17.3309	0.000217283	0.0330822	4	7	Down-regulated
Papio_anubis_ENSPANG00000022056	-4.08135	1.47742	18.1586	0.000220218	0.0330822	4	7	Down-regulated
Papio_anubis_MANBA	-5.86555	1.63944	18.032	0.000225654	0.0330822	4	7	Down-regulated
Papio_anubis_DOCK2	-6.11542	1.83034	19.8301	0.00022582	0.0330822	4	7	Down-regulated
Papio_anubis_PSMD1	-4.81211	0.992053	17.5389	0.000227152	0.0330822	4	7	Down-regulated
Papio_anubis_PAFAH1B1	-2.74136	2.20086	17.0557	0.000229835	0.0330822	4	7	Down-regulated
Papio_anubis_NFKBIZ	-3.55477	1.11284	16.9092	0.000230811	0.0330822	4	7	Down-regulated
Papio_anubis_SMAP1	-4.54032	1.73628	16.7696	0.000230978	0.0330822	4	7	Down-regulated
Papio_anubis_VPS54	-4.84557	1.12789	16.8151	0.000231273	0.0330822	4	7	Down-regulated
Papio_anubis_AP3B1	-5.13445	1.2974	17.0335	0.000231567	0.0330822	4	7	Down-regulated
Papio_anubis_PHIP	-5.68979	1.65482	17.6673	0.000232607	0.0330822	4	7	Down-regulated
Papio_anubis_ETV6	-4.7058	2.02004	17.2688	0.000239874	0.0334649	4	7	Down-regulated
Papio_anubis_MLLT3	-4.23513	1.34035	16.3438	0.00024	0.0334649	4	7	Down-regulated
Papio_anubis_FBXO11	-5.92808	1.60131	17.6578	0.000240764	0.0334649	4	7	Down-regulated
Papio_anubis_TTC17	-5.34676	1.08934	18.5326	0.000252799	0.0345151	4	7	Down-regulated
Papio_anubis_DPYD	-5.14411	2.19717	17.2032	0.00025331	0.0345151	4	7	Down-regulated
Papio_anubis_PPP1R12A	-4.45653	1.58101	16.9923	0.000256963	0.0346713	4	7	Down-regulated
Papio_anubis_USP34	-5.52091	1.58895	17.4353	0.000262942	0.0348124	4	7	Down-regulated
Papio_anubis_ENSPANG00000011213	-4.67177	1.24168	16.2358	0.000263044	0.0348124	4	7	Down-regulated
Papio_anubis_WASHC4	-3.06688	2.45639	16.6214	0.000275334	0.0354397	4	7	Down-regulated
Papio_anubis_ZNF148	-2.98941	1.64195	15.8329	0.00027674	0.0354397	4	7	Down-regulated
Papio_anubis_MAP3K5	-4.88893	0.940561	17.428	0.000277227	0.0354397	4	7	Down-regulated
Papio_anubis_OSBPL9	-5.78224	1.66747	16.9161	0.000279647	0.0354397	4	7	Down-regulated
Papio_anubis_EWSR1	-3.52337	1.31137	16.1603	0.000280596	0.0354397	4	7	Down-regulated
Sus_scrofa___ST3GAL5	-1.8178	5.9764	17.4203	0.000283802	0.0355336	4	7	Down-regulated
Papio_anubis_CNOT4	-3.01418	2.54953	16.7234	0.000284098	0.0355336	4	7	Down-regulated
Sus_scrofa___LRMDA	-0.998554	9.8421	17.3978	0.000285194	0.0355336	4	7	Down-regulated
Papio_anubis_EIF4G3	-6.22757	1.86952	16.7092	0.000290777	0.0360668	4	7	Down-regulated
Papio_anubis_TBC1D22A	-3.72238	1.58794	15.881	0.000303566	0.0372298	4	7	Down-regulated
Sus_scrofa___TNFAIP2	-1.53085	3.97449	17.0734	0.000307337	0.0372848	4	7	Down-regulated
Papio_anubis_YTHDC2	-3.67277	1.85188	15.7903	0.000322791	0.0383215	4	7	Down-regulated
Sus_scrofa___ABCA8	-1.50118	9.41924	16.9935	0.000324543	0.0383627	4	7	Down-regulated
Papio_anubis_NFAT5	-5.17799	1.52769	15.9206	0.0003268	0.0384651	4	7	Down-regulated
Papio_anubis_SOS1	-5.46487	1.38813	16.3649	0.000328694	0.0385067	4	7	Down-regulated
Sus_scrofa___STON2	-1.1156	8.20381	16.9248	0.000331802	0.0385067	4	7	Down-regulated
Papio_anubis_HLCS	-4.71166	0.811254	18.303	0.000332722	0.0385067	4	7	Down-regulated
Papio_anubis_PITPNC1	-5.50575	1.29788	16.8367	0.000350263	0.0396444	4	7	Down-regulated
Papio_anubis_AKAP9	-2.85902	1.86124	15.3351	0.000358758	0.0398524	4	7	Down-regulated
Papio_anubis_BTBD9	-4.94129	1.04869	15.9714	0.000366832	0.0404246	4	7	Down-regulated
Papio_anubis_ARID4B	-3.56486	2.6612	15.83	0.000371409	0.0406054	4	7	Down-regulated
Papio_anubis_PCBP2	-3.26247	1.9668	15.2762	0.000377025	0.0408961	4	7	Down-regulated
Papio_anubis_HNRNPH3	-4.76634	1.17656	16.4211	0.000379122	0.040963	4	7	Down-regulated
Papio_anubis_EPC1	-3.07004	2.11313	15.4203	0.000384905	0.0412654	4	7	Down-regulated
Papio_anubis_SBF2	-5.50875	1.44893	16.29	0.00038962	0.0415796	4	7	Down-regulated
Papio_anubis_HUWE1	-2.68877	1.94958	15.2497	0.000393995	0.041644	4	7	Down-regulated
Papio_anubis_ARID1B	-3.89234	1.88907	15.4607	0.000394458	0.041644	4	7	Down-regulated
Papio_anubis_ITGA4	-5.52465	1.18709	16.5546	0.000406605	0.0424404	4	7	Down-regulated
Papio_anubis_CNTRL	-4.95358	1.09082	15.8851	0.000412949	0.0426757	4	7	Down-regulated
Papio_anubis_BTRC	-4.87403	1.0328	16.2875	0.000413488	0.0426757	4	7	Down-regulated
Sus_scrofa___VEGFD	-2.00895	6.98364	16.1943	0.000420865	0.0431399	4	7	Down-regulated
Papio_anubis_ANKRD17	-3.58316	2.24796	15.0799	0.000421105	0.0431399	4	7	Down-regulated
Papio_anubis_RBM33	-4.88058	1.03849	15.6694	0.000423013	0.0431754	4	7	Down-regulated
Papio_anubis_GPHN	-5.54431	1.33162	16.2886	0.00042764	0.0434873	4	7	Down-regulated
Papio_anubis_KAT6A	-5.09783	1.14421	15.7823	0.000446211	0.0447879	4	7	Down-regulated
Papio_anubis_SAFB	-4.76678	1.0566	15.1629	0.000446907	0.0447879	4	7	Down-regulated
Papio_anubis_JMJD1C	-5.94484	1.71324	15.2449	0.000454338	0.0451617	4	7	Down-regulated
Papio_anubis_ARHGAP15	-5.54514	2.09759	16.2725	0.00045529	0.0451617	4	7	Down-regulated
Papio_anubis_STK38	-3.2193	1.61486	14.53	0.000462497	0.0456881	4	7	Down-regulated
Papio_anubis_RABGAP1L	-4.88439	1.74103	14.9538	0.000477166	0.0468029	4	7	Down-regulated
Papio_anubis_PNISR	-1.78381	3.94222	15.7897	0.000488416	0.0476487	4	7	Down-regulated
Papio_anubis_CBLB	-5.43926	1.92271	16.3829	0.000491175	0.0476487	4	7	Down-regulated
Sus_scrofa___UACA	-0.926294	8.65229	15.7149	0.000492708	0.0476487	4	7	Down-regulated
Sus_scrofa___NRCAM	-4.37823	2.36022	15.4736	0.000495696	0.0476487	4	7	Down-regulated
Papio_anubis_FUBP1	-4.99825	1.25836	14.8519	0.000496777	0.0476487	4	7	Down-regulated
Papio_anubis_MKLN1	-4.95838	1.06036	15.2743	0.000497848	0.0476487	4	7	Down-regulated
Papio_anubis_PICALM	-5.06539	1.19646	15.0657	0.000503172	0.0479922	4	7	Down-regulated
Sus_scrofa___ENSSSCG00000042459	-2.48896	1.11497	14.1508	0.000506787	0.0481708	4	7	Down-regulated
Papio_anubis_DCAF6	-4.13351	1.45626	14.6432	0.000509393	0.0482528	4	7	Down-regulated
Papio_anubis_RAB14	-3.63442	1.08521	14.79	0.000514768	0.0485955	4	7	Down-regulated
Papio_anubis_UVRAG	-4.30906	1.29702	14.8331	0.000526592	0.0494497	4	7	Down-regulated
Papio_anubis_MED13L	-5.05422	1.79979	15.1132	0.000527392	0.0494497	4	7	Down-regulated
Sus_scrofa___GRM7	-2.49116	5.91944	15.4599	0.00053817	0.049629	4	7	Down-regulated
Papio_anubis_ARID2	-2.8758	2.84305	15.0805	0.000543648	0.049629	4	7	Down-regulated
Papio_anubis_PIP4K2A	-5.11522	1.08148	15.1564	0.000550228	0.0498122	4	7	Down-regulated
Sus_scrofa___EYA1	-1.90184	3.76418	15.3701	0.000558006	0.0498922	4	7	Down-regulated
Sus_scrofa___ENSSSCG00000014178	-2.30575	1.9619	14.2027	0.000559168	0.0498922	4	7	Down-regulated

## Sheet: Mural cells
Gene	logFC	logCPM	F	PValue	FDR	Observations_Rejection	Observations_Standard	level
Sus_scrofa___NDRG1	2.63425	6.1863	29.6655	3.22321e-06	0.00961249	4	7	Up-regulated
Sus_scrofa___GLYATL2	2.8607	4.65299	27.5928	3.53837e-06	0.00961249	4	7	Up-regulated
Sus_scrofa___UGP2	1.76248	7.15639	29.3941	3.80133e-06	0.00961249	4	7	Up-regulated
Sus_scrofa___ENAH	1.4016	8.77181	28.7836	4.47208e-06	0.00961249	4	7	Up-regulated
Sus_scrofa___FN1	2.61526	8.45685	24.6654	1.53931e-05	0.0251898	4	7	Up-regulated
Sus_scrofa___ITPR1	1.31054	10.4059	24.3675	1.69277e-05	0.0251898	4	7	Up-regulated
Sus_scrofa___KIT	2.55902	6.66635	22.5468	3.03583e-05	0.0396352	4	7	Up-regulated
Sus_scrofa___ERRFI1	1.56383	6.83305	22.5333	3.07329e-05	0.0396352	4	7	Up-regulated
Sus_scrofa___CHSY1	1.50507	8.05328	21.9302	3.71005e-05	0.0409627	4	7	Up-regulated
Sus_scrofa___PLOD2	1.35711	9.0426	21.8149	3.84258e-05	0.0409627	4	7	Up-regulated
Sus_scrofa___PI15	3.75735	6.51414	20.9428	4.0643e-05	0.0409627	4	7	Up-regulated
Sus_scrofa___ENSSSCG00000047553	2.70924	6.51937	21.4905	4.23497e-05	0.0409627	4	7	Up-regulated
Sus_scrofa___TMEM45A	1.9155	6.4326	20.7847	5.38128e-05	0.0463741	4	7	Up-regulated
Sus_scrofa___FAM13A	1.23415	9.08695	20.7223	5.51359e-05	0.0463741	4	7	Up-regulated
Sus_scrofa___RCAN2	-2.00944	10.0275	36.4438	5.46597e-07	0.00544146	4	7	Down-regulated
Sus_scrofa___MYH6	-4.83642	5.71173	33.8217	5.6257e-07	0.00544146	4	7	Down-regulated
Sus_scrofa___GRIK4	-2.55743	8.55921	33.2699	1.27482e-06	0.00822043	4	7	Down-regulated
Sus_scrofa___ISYNA1	-2.36604	6.89017	30.6756	2.63409e-06	0.00961249	4	7	Down-regulated
Papio_anubis_DIAPH2	-5.70881	4.57585	28.9516	4.0571e-06	0.00961249	4	7	Down-regulated
Sus_scrofa___SPTBN2	-3.17519	5.39836	26.3124	7.0955e-06	0.0137262	4	7	Down-regulated
Sus_scrofa___FRRS1L	-3.34408	5.18057	23.1777	1.65886e-05	0.0251898	4	7	Down-regulated
Sus_scrofa___IL31RA	-1.72217	7.40318	21.7762	3.90549e-05	0.0409627	4	7	Down-regulated
Papio_anubis_NKTR	-4.757	4.11389	20.7069	4.48738e-05	0.0413373	4	7	Down-regulated

## Sheet: Neuronal cells
Gene	logFC	logCPM	F	PValue	FDR	Observations_Rejection	Observations_Standard	level
Sus_scrofa___SLCO6A1	4.15142	7.57251	43.4942	3.78876e-09	5.31904e-05	4	7	Up-regulated
Sus_scrofa___FN1	3.41573	6.9633	36.3329	4.15764e-08	0.00021402	4	7	Up-regulated
Sus_scrofa___DIO2	7.1559	6.70181	38.0954	4.57341e-08	0.00021402	4	7	Up-regulated
Sus_scrofa___RGS6	3.38048	8.16069	32.3863	2.30093e-07	0.000807569	4	7	Up-regulated
Sus_scrofa___NCAM1	1.75936	9.86258	24.4493	4.80899e-06	0.0135027	4	7	Up-regulated
Sus_scrofa___PDK4	2.83825	8.15525	20.2199	2.48419e-05	0.0448769	4	7	Up-regulated
Sus_scrofa___IGF2BP2	2.26807	7.6234	19.7249	3.03303e-05	0.0473119	4	7	Up-regulated
Sus_scrofa___CACNB2	-2.23652	9.84355	22.6713	9.48951e-06	0.0222039	4	7	Down-regulated
Sus_scrofa___CORIN	-4.56922	7.61545	20.1984	2.55727e-05	0.0448769	4	7	Down-regulated

## Sheet: Resident Immune
Gene	logFC	logCPM	F	PValue	FDR	Observations_Rejection	Observations_Standard	level
Sus_scrofa___FBXW11	3.96106	8.2109	25.5209	2.35687e-06	0.00713157	4	7	Up-regulated
Sus_scrofa___SAMSN1	4.08264	9.03015	25.3541	2.36451e-06	0.00713157	4	7	Up-regulated
Sus_scrofa___ENSSSCG00000026043	9.92703	9.00339	24.82	3.53851e-06	0.0089135	4	7	Up-regulated
Sus_scrofa___ENSSSCG00000017791	5.4034	8.00517	24.4321	4.09594e-06	0.00902797	4	7	Up-regulated
Sus_scrofa___F13A1	3.90098	11.0118	23.4537	5.78379e-06	0.0101986	4	7	Up-regulated
Sus_scrofa___FKBP5	3.21814	11.2417	23.2209	6.58215e-06	0.0105512	4	7	Up-regulated
Sus_scrofa___HBP1	4.02568	7.47454	22.1613	9.76406e-06	0.013918	4	7	Up-regulated
Sus_scrofa___EPSTI1	3.90206	8.58567	21.8412	1.02611e-05	0.013918	4	7	Up-regulated
Sus_scrofa___FAM13A	2.86586	9.46181	21.6132	1.22924e-05	0.0154823	4	7	Up-regulated
Sus_scrofa___HERC6	3.79441	9.32355	20.8301	1.60145e-05	0.0188256	4	7	Up-regulated
Sus_scrofa___PTK2B	8.59687	8.3891	21.0657	1.73734e-05	0.0191466	4	7	Up-regulated
Sus_scrofa___SLC27A6	3.53678	7.84106	20.3929	1.85252e-05	0.019215	4	7	Up-regulated
Sus_scrofa___TXNIP	3.20972	8.66966	20.0722	2.19744e-05	0.0209589	4	7	Up-regulated
Sus_scrofa___APP	2.88278	10.7192	20.1635	2.31342e-05	0.0209589	4	7	Up-regulated
Sus_scrofa___IFIH1	5.00792	7.69636	20.1672	2.37724e-05	0.0209589	4	7	Up-regulated
Sus_scrofa___CRACDL	4.35026	8.66586	19.7377	2.59204e-05	0.0210864	4	7	Up-regulated
Sus_scrofa___ERC1	2.79948	8.92551	19.7471	2.63087e-05	0.0210864	4	7	Up-regulated
Sus_scrofa___TUT7	3.05898	10.4387	19.4219	3.12461e-05	0.0239549	4	7	Up-regulated
Sus_scrofa___HSPH1	8.06211	7.06102	18.2345	5.60849e-05	0.035919	4	7	Up-regulated
Sus_scrofa___IRS2	8.22261	7.12822	18.1816	5.75371e-05	0.035919	4	7	Up-regulated
Sus_scrofa___ENSSSCG00000005949	4.74678	7.66114	18.008	5.79228e-05	0.035919	4	7	Up-regulated
Sus_scrofa___ARL8B	3.36834	7.76133	17.8393	5.84881e-05	0.035919	4	7	Up-regulated
Sus_scrofa___ENSSSCG00000020967	7.96931	7.8472	17.7205	6.83779e-05	0.0401902	4	7	Up-regulated
Sus_scrofa___EIF2AK2	3.11883	8.5637	17.0457	8.14088e-05	0.0445672	4	7	Up-regulated
Sus_scrofa___PPARG	2.91121	8.97397	17.0207	8.43475e-05	0.0445672	4	7	Up-regulated
Sus_scrofa___ESCO1	3.23708	7.66008	16.7414	9.47967e-05	0.0445672	4	7	Up-regulated
Sus_scrofa___GLIS3	2.60402	9.56597	16.717	9.97495e-05	0.0445672	4	7	Up-regulated
Sus_scrofa___MX2	3.68892	9.51709	16.6315	9.98429e-05	0.0445672	4	7	Up-regulated
Sus_scrofa___ZCCHC2	3.70297	7.08883	16.4836	0.000109106	0.0445672	4	7	Up-regulated
Sus_scrofa___ENSSSCG00000029160	8.61805	8.80676	16.6082	0.000109514	0.0445672	4	7	Up-regulated
Sus_scrofa___HERC5	3.41139	8.45484	16.3565	0.000110129	0.0445672	4	7	Up-regulated
Sus_scrofa___GRK3	2.9325	9.12988	16.3922	0.000112394	0.0445672	4	7	Up-regulated
Sus_scrofa___TSC22D3	3.67044	7.38235	16.3813	0.000113539	0.0445672	4	7	Up-regulated
Sus_scrofa___JDP2	7.63013	6.75659	16.463	0.000117269	0.0445672	4	7	Up-regulated
Sus_scrofa___STX12	3.42348	7.73341	16.2381	0.000118792	0.0445672	4	7	Up-regulated
Sus_scrofa___USP15	2.53092	9.11591	16.167	0.000124377	0.0456905	4	7	Up-regulated
Sus_scrofa___MLXIP	2.8414	8.76117	16.0337	0.000128131	0.0461088	4	7	Up-regulated
Sus_scrofa___KLHL5	2.90859	7.94979	15.7818	0.000142276	0.04874	4	7	Up-regulated
Sus_scrofa___PARP14	4.79501	7.76643	15.9456	0.000144737	0.04874	4	7	Up-regulated
Sus_scrofa___DBT	7.43039	6.37228	16.0055	0.000145556	0.04874	4	7	Up-regulated
Sus_scrofa___ITSN1	2.71326	10.2754	15.8357	0.000147962	0.04874	4	7	Up-regulated
Sus_scrofa___RESF1	3.29881	8.7638	15.6508	0.000151674	0.04874	4	7	Up-regulated
Sus_scrofa___SEPTIN2	7.39571	6.69599	15.8674	0.000154791	0.04874	4	7	Up-regulated
Sus_scrofa___GRIK2	-6.68527	7.80204	35.9704	4.25597e-08	0.000750455	4	7	Down-regulated
Sus_scrofa___GALNT13	-6.08008	5.90681	28.2277	8.29911e-07	0.00630564	4	7	Down-regulated
Sus_scrofa___ENSSSCG00000035789	-8.00495	7.98415	27.6975	1.07281e-06	0.00630564	4	7	Down-regulated
Sus_scrofa___ELOVL2	-7.48097	5.01125	25.479	2.42667e-06	0.00713157	4	7	Down-regulated
Sus_scrofa___MYH6	-4.21726	7.05037	23.4247	5.70917e-06	0.0101986	4	7	Down-regulated
Sus_scrofa___NEB	-5.29553	6.00089	18.7902	3.84004e-05	0.0282131	4	7	Down-regulated
Sus_scrofa___ACTC1	-4.15851	6.00957	17.839	5.90739e-05	0.035919	4	7	Down-regulated
Sus_scrofa___GADL1	-5.11961	5.01753	17.2247	7.37956e-05	0.0419754	4	7	Down-regulated
Sus_scrofa___MARCHF11	-6.66638	4.00487	16.7045	9.86413e-05	0.0445672	4	7	Down-regulated
Sus_scrofa___RNF212B	-6.71067	4.07725	16.5842	0.000100123	0.0445672	4	7	Down-regulated
Sus_scrofa___CMTM5	-4.44579	5.05259	16.252	0.000118089	0.0445672	4	7	Down-regulated
Sus_scrofa___ENSSSCG00000040253	-6.5075	3.88401	16.3531	0.00011867	0.0445672	4	7	Down-regulated
Sus_scrofa___ENSSSCG00000015795	-4.39888	4.82842	15.6219	0.000153175	0.04874	4	7	Down-regulated

## Sheet: Vascular EC
Gene	logFC	logCPM	F	PValue	FDR	Observations_Rejection	Observations_Standard	level
Sus_scrofa___RGS2	2.66925	6.30092	42.1482	1.98232e-07	0.00480315	4	7	Up-regulated
Sus_scrofa___DDIT4	2.08492	7.76511	33.0154	1.98662e-06	0.0120339	4	7	Up-regulated
Sus_scrofa___PLSCR4	1.60439	7.5774	31.3829	3.03733e-06	0.0147189	4	7	Up-regulated
Sus_scrofa___TMCC3	1.47281	8.6589	30.1244	4.22924e-06	0.0170791	4	7	Up-regulated
Sus_scrofa___SPRY1	1.0398	8.89313	29.1772	5.47262e-06	0.0189431	4	7	Up-regulated
Sus_scrofa___WFDC1	2.33501	7.42565	28.7183	6.27259e-06	0.0189981	4	7	Up-regulated
Sus_scrofa___GALNT15	1.9562	6.34063	27.7082	8.2506e-06	0.0222125	4	7	Up-regulated
Sus_scrofa___DGKI	2.07073	6.53302	25.322	1.47559e-05	0.0301616	4	7	Up-regulated
Sus_scrofa___GABRA2	3.35128	3.41507	23.4863	1.49376e-05	0.0301616	4	7	Up-regulated
Sus_scrofa___SAV1	1.74537	4.44408	22.6296	3.02235e-05	0.0414417	4	7	Up-regulated
Sus_scrofa___ENSSSCG00000047553	1.94763	4.63923	22.8976	3.10994e-05	0.0414417	4	7	Up-regulated
Sus_scrofa___KCNN2	2.36948	7.30828	23.0616	3.11604e-05	0.0414417	4	7	Up-regulated
Sus_scrofa___ELL2	1.89337	5.62606	22.6688	3.54559e-05	0.041456	4	7	Up-regulated
Sus_scrofa___NABP1	1.59263	5.59989	22.4901	3.88202e-05	0.041456	4	7	Up-regulated
Papio_anubis_RBPJ	-3.89575	3.65379	35.425	4.03483e-07	0.0048882	4	7	Down-regulated
Papio_anubis_MEF2A	-5.6498	2.97412	34.9014	6.53746e-07	0.00528009	4	7	Down-regulated
Papio_anubis_MAML2	-5.417	2.79029	26.6774	1.07751e-05	0.026108	4	7	Down-regulated
Sus_scrofa___RCAN2	-3.08648	7.91227	24.0568	2.34301e-05	0.0414417	4	7	Down-regulated
Sus_scrofa___HEYL	-2.77029	3.70494	22.2043	2.7214e-05	0.0414417	4	7	Down-regulated
Sus_scrofa___LAMC2	-2.67017	4.11759	22.519	3.19837e-05	0.0414417	4	7	Down-regulated
Sus_scrofa___ADAMTSL3	-1.75291	6.84517	22.9114	3.24966e-05	0.0414417	4	7	Down-regulated
Sus_scrofa___RYR2	-2.89649	9.8583	22.4738	3.87621e-05	0.041456	4	7	Down-regulated
Sus_scrofa___TNNT2	-3.66081	7.08643	22.2499	3.93516e-05	0.041456	4	7	Down-regulated

## Sheet: Lymphoids baboon 
Gene	logFC	logCPM	F	PValue	FDR	Observations_Rejection	Observations_Standard	level
Papio_anubis_SLC4A10	3.41087	5.85325	35.7113	5.0535e-07	0.00767486	4	7	Up-regulated
Papio_anubis_MAST4	2.21694	7.64447	35.5497	6.94086e-07	0.00767486	4	7	Up-regulated
Papio_anubis_ZDHHC14	1.36976	9.14016	27.9899	6.00774e-06	0.044287	4	7	Up-regulated

## Sheet: Myeloids baboon 
Gene	logFC	logCPM	F	PValue	FDR	Observations_Rejection	Observations_Standard	level
Papio_anubis_SLC1A3	2.73735	8.2072	45.4232	4.01637e-07	0.00656696	4	7	Up-regulated
Papio_anubis_CUL1	1.63481	9.03071	42.5327	4.91134e-07	0.00656696	4	7	Up-regulated
Papio_anubis_CD300LF	1.63665	8.06965	37.6713	1.28646e-06	0.00857328	4	7	Up-regulated
Papio_anubis_KIAA1549L	2.83583	7.27504	36.1151	1.71339e-06	0.00857328	4	7	Up-regulated
Papio_anubis_HPGD	3.81781	4.0185	32.535	1.97937e-06	0.00857328	4	7	Up-regulated
Papio_anubis_NDRG1	2.29503	6.23451	34.9859	2.42766e-06	0.00857328	4	7	Up-regulated
Papio_anubis_ENSPANG00000042335	3.53373	3.67705	30.5829	2.69077e-06	0.00857328	4	7	Up-regulated
Papio_anubis_TGM2	3.57372	4.72041	32.0101	3.20097e-06	0.00857328	4	7	Up-regulated
Papio_anubis_SEMA3C	1.87728	6.44119	33.9519	3.24204e-06	0.00857328	4	7	Up-regulated
Papio_anubis_ENSPANG00000037119	2.68498	5.43989	32.7508	4.28675e-06	0.00857328	4	7	Up-regulated
Papio_anubis_GCH1	2.62883	6.13968	31.9329	5.53799e-06	0.00857328	4	7	Up-regulated
Papio_anubis_CHSY1	1.70988	8.0795	31.5278	5.57435e-06	0.00857328	4	7	Up-regulated
Papio_anubis_VCAN	3.52253	9.51642	30.9395	6.99789e-06	0.00984935	4	7	Up-regulated
Papio_anubis_EGLN3	2.47381	6.17966	30.8134	7.66397e-06	0.0102475	4	7	Up-regulated
Papio_anubis_ENSPANG00000040861	1.97838	5.23165	29.9448	8.66648e-06	0.0104683	4	7	Up-regulated
Papio_anubis_PTEN	1.35943	9.0126	29.9827	8.82195e-06	0.0104683	4	7	Up-regulated
Papio_anubis_TGFBR3	2.01223	5.84082	29.1481	9.0035e-06	0.0104683	4	7	Up-regulated
Papio_anubis_ENSPANG00000038988	3.65498	3.52848	26.3242	1.06236e-05	0.0118373	4	7	Up-regulated
Papio_anubis_ENSPANG00000048902	2.70804	5.40871	27.3317	1.28626e-05	0.0132297	4	7	Up-regulated
Papio_anubis_ANPEP	3.50805	5.39666	25.4667	1.78681e-05	0.0154139	4	7	Up-regulated
Papio_anubis_C7orf33	2.44006	3.84618	24.2733	2.65257e-05	0.0191716	4	7	Up-regulated
Papio_anubis_SERPINB10	4.6257	3.70291	24.5947	2.84888e-05	0.0198987	4	7	Up-regulated
Papio_anubis_FRRS1	1.95782	5.04608	24.5326	2.90199e-05	0.0198987	4	7	Up-regulated
Papio_anubis_ADAMTS2	1.87113	7.14287	24.6097	3.42113e-05	0.0217829	4	7	Up-regulated
Papio_anubis_CORO2A	2.55785	5.53105	24.6962	3.70434e-05	0.0230375	4	7	Up-regulated
Papio_anubis_ENSPANG00000051176	2.18953	4.15604	23.2439	4.09883e-05	0.0239428	4	7	Up-regulated
Papio_anubis_ERO1A	1.18926	8.32009	23.2218	4.58958e-05	0.0253441	4	7	Up-regulated
Papio_anubis_GBE1	1.35287	8.07706	23.4739	4.64386e-05	0.0253441	4	7	Up-regulated
Papio_anubis_ANXA3	2.82798	5.25912	22.4871	5.27181e-05	0.0276429	4	7	Up-regulated
Papio_anubis_ADORA2B	2.03772	6.06005	22.6898	5.5406e-05	0.0282374	4	7	Up-regulated
Papio_anubis_ATP13A3	1.41827	8.38077	22.859	5.59638e-05	0.0282374	4	7	Up-regulated
Papio_anubis_RMI2	2.52901	3.58793	21.1306	5.77335e-05	0.028275	4	7	Up-regulated
Papio_anubis_FAM124A	3.54273	3.73847	20.4819	5.81529e-05	0.028275	4	7	Up-regulated
Papio_anubis_GK5	1.84689	6.73386	22.3887	6.11538e-05	0.0288526	4	7	Up-regulated
Papio_anubis_VDR	2.07794	4.63853	22.2552	6.28169e-05	0.0289629	4	7	Up-regulated
Papio_anubis_STX11	1.36711	6.47807	21.4487	7.40823e-05	0.0329438	4	7	Up-regulated
Papio_anubis_ENSPANG00000049293	2.54309	3.85769	20.9806	7.68524e-05	0.0329438	4	7	Up-regulated
Papio_anubis_CRISPLD2	4.47794	3.24544	21.3207	7.78928e-05	0.0329438	4	7	Up-regulated
Papio_anubis_ENSPANG00000023537	1.50483	6.70009	21.376	8.13064e-05	0.0329439	4	7	Up-regulated
Papio_anubis_IL1RAP	1.72699	7.66721	21.2223	8.374e-05	0.033395	4	7	Up-regulated
Papio_anubis_ENSPANG00000040501	2.62804	4.79239	21.0292	8.54304e-05	0.033395	4	7	Up-regulated
Papio_anubis_CHKA	1.6009	7.7229	20.9197	8.90199e-05	0.0340081	4	7	Up-regulated
Papio_anubis_PIK3CB	1.07773	9.27456	20.6714	0.000102424	0.0380422	4	7	Up-regulated
Papio_anubis_MXI1	1.56877	7.23333	20.6417	0.00010578	0.0387185	4	7	Up-regulated
Papio_anubis_DPYD	0.982624	11.9274	20.6072	0.000107141	0.0387185	4	7	Up-regulated
Papio_anubis_ENSPANG00000016266	2.32437	4.96097	19.8775	0.00013109	0.0463579	4	7	Up-regulated
Papio_anubis_ENSPANG00000046018	2.58107	3.52763	18.3862	0.000133432	0.0463579	4	7	Up-regulated
Papio_anubis_AR	-1.66177	7.08503	35.7244	1.93939e-06	0.00857328	4	7	Down-regulated
Sus_scrofa___C2CD2L	-5.34831	2.85931	34.5608	4.57992e-06	0.00857328	4	7	Down-regulated
Papio_anubis_ATRNL1	-1.86599	7.46569	32.2561	4.90048e-06	0.00857328	4	7	Down-regulated
Papio_anubis_FOLR2	-2.34863	5.28109	32.5349	5.17333e-06	0.00857328	4	7	Down-regulated
Papio_anubis_IL12RB2	-2.41751	8.66626	31.1222	5.58422e-06	0.00857328	4	7	Down-regulated
Papio_anubis_ADGB	-1.49714	5.9365	32.0425	5.77067e-06	0.00857328	4	7	Down-regulated
Papio_anubis_CD83	-1.9923	9.17395	28.3276	1.22625e-05	0.013117	4	7	Down-regulated
Papio_anubis_C9	-4.53349	3.24168	27.0573	1.56985e-05	0.0150286	4	7	Down-regulated
Papio_anubis_SLC40A1	-3.35729	6.90774	27.8365	1.65177e-05	0.0150286	4	7	Down-regulated
Papio_anubis_DAB2	-1.66798	9.82961	27.422	1.6572e-05	0.0150286	4	7	Down-regulated
Papio_anubis_HPGDS	-4.17673	6.039	28.2778	1.68595e-05	0.0150286	4	7	Down-regulated
Papio_anubis_GLCCI1	-1.48869	7.53315	26.0096	1.97011e-05	0.0163652	4	7	Down-regulated
Papio_anubis_SEMA6A	-2.3294	5.8118	26.7522	2.01948e-05	0.0163652	4	7	Down-regulated
Papio_anubis_CCL2	-3.02798	6.60786	26.4312	2.27091e-05	0.0178614	4	7	Down-regulated
Papio_anubis_PLPP4	-3.64486	3.96605	24.8056	2.4184e-05	0.018478	4	7	Down-regulated
Papio_anubis_CD14	-1.86221	5.90592	26.1849	2.51661e-05	0.0186942	4	7	Down-regulated
Papio_anubis_KLHL13	-2.06292	6.35255	25.2875	3.20473e-05	0.0211347	4	7	Down-regulated
Sus_scrofa___ACTN2	-4.26758	5.36618	25.438	3.24031e-05	0.0211347	4	7	Down-regulated
Papio_anubis_FRRS1L	-4.24374	3.49124	23.6429	4.05161e-05	0.0239428	4	7	Down-regulated
Sus_scrofa___CAMK2D	-3.45793	4.03151	23.5914	4.13847e-05	0.0239428	4	7	Down-regulated
Papio_anubis_VNN1	-3.07812	4.12734	23.4791	4.20802e-05	0.0239428	4	7	Down-regulated
Papio_anubis_PDE4D	-2.14736	8.40252	23.363	4.82563e-05	0.0258094	4	7	Down-regulated
Papio_anubis_DEPTOR	-1.70726	6.98641	22.0864	6.14986e-05	0.0288526	4	7	Down-regulated
Papio_anubis_BCAR3	-1.22829	8.5364	22.3956	6.39452e-05	0.0289834	4	7	Down-regulated
Papio_anubis_CCDC141	-2.37613	7.71237	21.3103	7.84443e-05	0.0329438	4	7	Down-regulated
Papio_anubis_ENSPANG00000017243	-1.74816	8.75181	21.6313	7.91976e-05	0.0329438	4	7	Down-regulated
Papio_anubis_DNER	-3.26157	5.7721	21.5173	8.00744e-05	0.0329438	4	7	Down-regulated
Papio_anubis_ABCA4	-1.98214	5.37652	21.3241	8.61662e-05	0.033395	4	7	Down-regulated
Papio_anubis_SH3PXD2A	-1.51375	8.2526	20.4844	0.000101604	0.0380422	4	7	Down-regulated
Papio_anubis_PCDHAC2	-1.65802	6.40889	19.9085	0.000133914	0.0463579	4	7	Down-regulated
Papio_anubis_ZFP36	-1.63284	6.17988	19.4185	0.000135215	0.0463579	4	7	Down-regulated
Papio_anubis_ENSPANG00000022056	-1.66974	9.32137	19.6565	0.000142543	0.0482517	4	7	Down-regulated
Papio_anubis_ADRB2	-1.74482	6.78265	18.9134	0.000148704	0.0497079	4	7	Down-regulated
