# Supplementary material for: Integrated Molecular Profiling of Preclinical and Clinical Cardiac Xenotransplants
Source: Research Square preprint supplement (doi:10.21203/rs.3.rs-8406985/v1), 2026-02-04
Supplement: Supplementary file 21 [file 9ee701ab32ab3628144bca2a.xlsx]

## Sheet: CM
Gene	logFC	logCPM	F	PValue	FDR	Observations_Transplanted	Observations_Control	level
Sus_scrofa___THBD	5.39452	2.60436	218.426	3.39477e-15	6.18714e-11	19	4	Up-regulated
Sus_scrofa___hCD46	14.2032	6.58207	247.349	7.62915e-15	9.26967e-11	19	4	Up-regulated
Sus_scrofa___RASAL1	6.69197	3.29926	72.2743	1.51687e-09	2.76457e-06	19	4	Up-regulated
Sus_scrofa___CMIP	3.60238	4.79349	65.0119	6.59763e-09	8.29276e-06	19	4	Up-regulated
Sus_scrofa___STAT3	2.20445	7.72706	64.5033	7.14062e-09	8.39622e-06	19	4	Up-regulated
Sus_scrofa___RAB32	2.30887	7.1369	62.12	1.04525e-08	1.19064e-05	19	4	Up-regulated
Sus_scrofa___ARID5A	4.04231	4.73133	60.5252	1.35895e-08	1.40932e-05	19	4	Up-regulated
Sus_scrofa___STX12	1.43906	6.47562	55.5277	3.16989e-08	2.62603e-05	19	4	Up-regulated
Sus_scrofa___SLC1A4	2.90779	4.22971	51.2899	6.78975e-08	5.4352e-05	19	4	Up-regulated
Sus_scrofa___STK17A	2.65198	2.79804	49.4431	9.62251e-08	7.30729e-05	19	4	Up-regulated
Sus_scrofa___KRT80	3.26473	5.31213	47.7655	1.31927e-07	9.59695e-05	19	4	Up-regulated
Sus_scrofa___ENSSSCG00000041254	3.00309	-0.764743	43.912	1.67727e-07	0.000115355	19	4	Up-regulated
Sus_scrofa___RPL31	2.25811	6.41511	44.6924	2.41741e-07	0.000139848	19	4	Up-regulated
Sus_scrofa___ENSSSCG00000013366	5.05803	5.05085	44.632	2.45542e-07	0.000139848	19	4	Up-regulated
Sus_scrofa___TLE3	4.13993	3.55127	43.7748	2.93523e-07	0.000156931	19	4	Up-regulated
Sus_scrofa___SLC22A15	1.91191	7.93953	43.1743	3.29249e-07	0.000166687	19	4	Up-regulated
Sus_scrofa___FERMT3	3.1098	2.28325	42.9169	3.51843e-07	0.000175686	19	4	Up-regulated
Sus_scrofa___XIAP	1.58787	8.48806	42.058	4.15001e-07	0.000190247	19	4	Up-regulated
Sus_scrofa___CLCN5	2.59672	4.78638	41.8044	4.37721e-07	0.000192739	19	4	Up-regulated
Sus_scrofa___ENSSSCG00000006395	3.27282	2.42633	41.826	4.41066e-07	0.000192739	19	4	Up-regulated
Sus_scrofa___PEA15	1.95389	4.0007	41.0855	5.09504e-07	0.00021347	19	4	Up-regulated
Sus_scrofa___MIDN	2.08972	4.34326	40.1081	6.27691e-07	0.000259999	19	4	Up-regulated
Sus_scrofa___SLCO2A1	6.61356	5.21031	38.6651	8.70123e-07	0.000319063	19	4	Up-regulated
Sus_scrofa___MOB3B	4.46247	4.62575	38.593	8.7462e-07	0.000319063	19	4	Up-regulated
Sus_scrofa___TENT5B	4.03094	1.36673	38.1186	9.27425e-07	0.000334709	19	4	Up-regulated
Sus_scrofa___MAP2K1	1.29441	6.45417	38.1839	9.55095e-07	0.000338194	19	4	Up-regulated
Sus_scrofa___NES	4.35184	3.78497	36.9764	1.25921e-06	0.000428967	19	4	Up-regulated
Sus_scrofa___ENSSSCG00000038200	2.70388	-0.724333	34.7738	1.56774e-06	0.000508804	19	4	Up-regulated
Sus_scrofa___HK2	5.73047	7.50233	35.4457	1.77536e-06	0.000557877	19	4	Up-regulated
Sus_scrofa___GPA33	2.94221	4.57034	35.1739	1.89102e-06	0.000589143	19	4	Up-regulated
Sus_scrofa___COQ10B	1.27792	5.08586	34.8541	2.03675e-06	0.000626574	19	4	Up-regulated
Sus_scrofa___ITGAV	1.83237	8.8764	34.5551	2.18432e-06	0.000647322	19	4	Up-regulated
Sus_scrofa___ENSSSCG00000036556	1.78906	7.092	34.4107	2.25971e-06	0.000657539	19	4	Up-regulated
Sus_scrofa___ENSSSCG00000000659	2.05384	2.29245	34.3715	2.29095e-06	0.000657539	19	4	Up-regulated
Sus_scrofa___RBM44	1.32541	2.98465	33.8747	2.56774e-06	0.000703734	19	4	Up-regulated
Sus_scrofa___ENSSSCG00000038144	2.60918	8.35902	33.7588	2.63638e-06	0.000711843	19	4	Up-regulated
Sus_scrofa___EVA1C	1.78569	6.48302	33.6521	2.70417e-06	0.000724776	19	4	Up-regulated
Sus_scrofa___ENSSSCG00000006452	3.39559	-0.618449	31.2569	3.23121e-06	0.000823642	19	4	Up-regulated
Sus_scrofa___WSB2	1.19138	5.94311	32.8199	3.30171e-06	0.000833839	19	4	Up-regulated
Sus_scrofa___ENSSSCG00000016426	1.87008	6.78284	32.5264	3.54489e-06	0.000855727	19	4	Up-regulated
Sus_scrofa___ENSSSCG00000010517	1.34802	5.31543	32.327	3.72116e-06	0.000873058	19	4	Up-regulated
Sus_scrofa___RPS6KA1	3.76423	0.60955	31.8795	3.73644e-06	0.000873058	19	4	Up-regulated
Sus_scrofa___DUSP5	6.82743	3.29824	31.3156	3.96325e-06	0.000908582	19	4	Up-regulated
Sus_scrofa___phTBM	10.4288	2.82317	33.5601	4.12588e-06	0.000928349	19	4	Up-regulated
Sus_scrofa___CDCP1	1.65732	4.41129	31.715	4.3232e-06	0.000956515	19	4	Up-regulated
Sus_scrofa___FLNC	2.17934	8.15926	31.6593	4.38227e-06	0.000956515	19	4	Up-regulated
Sus_scrofa___ENSSSCG00000035992	1.94671	7.28605	31.0318	5.11927e-06	0.00107666	19	4	Up-regulated
Sus_scrofa___STAC2	6.88776	6.49377	31.0314	5.13947e-06	0.00107666	19	4	Up-regulated
Sus_scrofa___RIT1	1.79597	2.11957	30.7155	5.56483e-06	0.00115911	19	4	Up-regulated
Sus_scrofa___TMCC3	2.81086	3.91222	30.4572	5.91506e-06	0.00122506	19	4	Up-regulated
Sus_scrofa___RASSF8	1.58258	8.81319	30.397	6.00155e-06	0.00123595	19	4	Up-regulated
Papio_anubis_ENSPANG00000037669	5.10619	-1.92643	28.9538	6.19839e-06	0.00126446	19	4	Up-regulated
Sus_scrofa___KLF10	4.057	2.42165	29.8748	6.92394e-06	0.00137915	19	4	Up-regulated
Sus_scrofa___PCSK5	1.99304	8.51247	29.6552	7.24355e-06	0.00143497	19	4	Up-regulated
Sus_scrofa___GUCY1B1	3.8346	0.713192	29.3094	7.28515e-06	0.00143541	19	4	Up-regulated
Sus_scrofa___ENSSSCG00000031818	1.31396	4.95694	29.4215	7.69034e-06	0.00149107	19	4	Up-regulated
Sus_scrofa___STX3	3.53555	1.61966	29.4298	7.75248e-06	0.00149129	19	4	Up-regulated
Sus_scrofa___LYN	2.31298	2.09403	29.4024	7.7733e-06	0.00149129	19	4	Up-regulated
Sus_scrofa___FSTL3	2.24132	4.42635	29.2874	7.96034e-06	0.00151917	19	4	Up-regulated
Sus_scrofa___DBNDD2	1.05136	3.59168	29.0623	8.43746e-06	0.00158024	19	4	Up-regulated
Sus_scrofa___PLEKHO1	2.18274	2.023	29.0413	8.52984e-06	0.00158633	19	4	Up-regulated
Sus_scrofa___ARNTL	2.35752	6.5697	28.9383	8.70855e-06	0.00160321	19	4	Up-regulated
Sus_scrofa___THOC6	2.60544	4.33226	28.8468	8.91934e-06	0.00162559	19	4	Up-regulated
Sus_scrofa___MAN1A1	4.18867	2.65093	28.7152	9.32149e-06	0.00164979	19	4	Up-regulated
Sus_scrofa___LONRF3	4.14336	5.26804	28.3974	1.00266e-05	0.0017487	19	4	Up-regulated
Sus_scrofa___KLF5	4.90337	1.27135	27.6067	1.02617e-05	0.0017708	19	4	Up-regulated
Sus_scrofa___CNN1	4.08659	5.42143	28.0771	1.09028e-05	0.00184845	19	4	Up-regulated
Sus_scrofa___ETS1	3.01974	4.02001	27.7871	1.17718e-05	0.00196038	19	4	Up-regulated
Sus_scrofa___WSB1	1.95903	7.26444	27.7657	1.18317e-05	0.00196038	19	4	Up-regulated
Sus_scrofa___LOXL2	3.27165	5.44371	27.6529	1.21909e-05	0.00199097	19	4	Up-regulated
Sus_scrofa___ENSSSCG00000017103	2.57154	4.48883	27.6518	1.21959e-05	0.00199097	19	4	Up-regulated
Sus_scrofa___ENSSSCG00000007692	1.05344	6.27622	27.6294	1.2266e-05	0.00199097	19	4	Up-regulated
Sus_scrofa___CNN3	6.74548	1.69443	25.9632	1.27509e-05	0.00204664	19	4	Up-regulated
Sus_scrofa___P4HA1	2.05003	7.89041	27.3424	1.32375e-05	0.00206206	19	4	Up-regulated
Sus_scrofa___IKBKE	3.51977	-0.00255214	26.127	1.57086e-05	0.002416	19	4	Up-regulated
Sus_scrofa___LMNTD1	2.50077	10.352	26.5966	1.61687e-05	0.00247632	19	4	Up-regulated
Sus_scrofa___SH3D19	3.36983	4.51256	26.3311	1.73806e-05	0.00261794	19	4	Up-regulated
Sus_scrofa___PDCD4	2.08371	6.4848	26.1602	1.82005e-05	0.0027115	19	4	Up-regulated
Sus_scrofa___DNAJB5	1.51952	4.982	26.1256	1.83737e-05	0.0027115	19	4	Up-regulated
Sus_scrofa___RHOU	3.42572	0.57125	25.8216	1.91574e-05	0.00280444	19	4	Up-regulated
Sus_scrofa___ENSSSCG00000016646	1.96271	8.41953	25.7592	2.03096e-05	0.00289182	19	4	Up-regulated
Sus_scrofa___NELL2	2.62891	5.18258	25.5398	2.15741e-05	0.00303629	19	4	Up-regulated
Sus_scrofa___YWHAH	1.50702	4.99753	25.5156	2.17186e-05	0.00304486	19	4	Up-regulated
Sus_scrofa___FYB1	2.07427	1.329	25.4011	2.26914e-05	0.00314495	19	4	Up-regulated
Sus_scrofa___CCN2	3.61385	5.34787	25.3243	2.28996e-05	0.00316179	19	4	Up-regulated
Sus_scrofa___CD44	1.93988	7.17698	25.2047	2.36684e-05	0.0031933	19	4	Up-regulated
Sus_scrofa___ENSSSCG00000009633	2.82824	3.80151	25.2007	2.37089e-05	0.0031933	19	4	Up-regulated
Sus_scrofa___FKBP1B	1.94923	2.73716	25.1989	2.3741e-05	0.0031933	19	4	Up-regulated
Sus_scrofa___FLRT2	6.09748	4.5895	25.1917	2.39407e-05	0.00319657	19	4	Up-regulated
Sus_scrofa___IFNAR1	1.46712	4.74946	24.7483	2.68808e-05	0.00347458	19	4	Up-regulated
Sus_scrofa___CLDND1	0.94299	5.58514	24.5128	2.8716e-05	0.00364713	19	4	Up-regulated
Sus_scrofa___ENSSSCG00000035669	6.35022	1.30882	23.1417	2.9948e-05	0.00376426	19	4	Up-regulated
Sus_scrofa___ARMC12	3.09498	2.60028	24.2792	3.08098e-05	0.00384605	19	4	Up-regulated
Papio_anubis_ENSPANG00000048037	6.52674	-0.846457	25.0421	3.17093e-05	0.00391809	19	4	Up-regulated
Sus_scrofa___SPECC1	2.05314	6.13197	24.1431	3.18758e-05	0.00391841	19	4	Up-regulated
Sus_scrofa___RPP30	2.67101	8.83658	24.1374	3.19269e-05	0.00391841	19	4	Up-regulated
Sus_scrofa___INHA	1.85732	3.09572	24.1119	3.2183e-05	0.00391875	19	4	Up-regulated
Sus_scrofa___NPPB	6.44808	6.8827	24.1045	3.22522e-05	0.00391875	19	4	Up-regulated
Sus_scrofa___FARP1	1.24698	6.8284	24.0351	3.28667e-05	0.00395653	19	4	Up-regulated
Sus_scrofa___TTC39C	2.5453	0.984285	23.9333	3.4387e-05	0.00409688	19	4	Up-regulated
Sus_scrofa___ATP1A2	2.42925	3.92752	23.8768	3.43926e-05	0.00409688	19	4	Up-regulated
Sus_scrofa___TAF5L	1.36943	5.08767	23.8592	3.4555e-05	0.00410282	19	4	Up-regulated
Sus_scrofa___PRKCB	1.35192	3.04684	23.7742	3.54261e-05	0.00415214	19	4	Up-regulated
Sus_scrofa___ENSSSCG00000048543	1.26115	3.26048	23.5315	3.79682e-05	0.00436037	19	4	Up-regulated
Sus_scrofa___PTGFR	1.66769	4.62314	23.5234	3.804e-05	0.00436037	19	4	Up-regulated
Sus_scrofa___PDE8A	1.14014	8.01095	23.4517	3.88283e-05	0.00443677	19	4	Up-regulated
Sus_scrofa___VPS13A	0.781551	7.0479	23.4147	3.92436e-05	0.00447022	19	4	Up-regulated
Sus_scrofa___CSRNP1	2.50852	1.90078	23.424	3.94009e-05	0.00447415	19	4	Up-regulated
Sus_scrofa___CLNK	2.90529	0.399675	23.3639	3.95591e-05	0.00447816	19	4	Up-regulated
Sus_scrofa___DAB2	2.52346	3.67965	23.366	3.98171e-05	0.00449342	19	4	Up-regulated
Sus_scrofa___ENSSSCG00000039871	3.22466	-1.7713	21.575	4.09924e-05	0.00458347	19	4	Up-regulated
Sus_scrofa___TEAD4	1.4021	6.2137	23.2228	4.14752e-05	0.00462328	19	4	Up-regulated
Sus_scrofa___SERPINB2	2.94889	6.23899	23.1706	4.21068e-05	0.00465931	19	4	Up-regulated
Sus_scrofa___LAX1	3.79578	0.365844	22.7881	4.21819e-05	0.00465931	19	4	Up-regulated
Sus_scrofa___C1orf115	4.62555	1.69019	22.9518	4.28892e-05	0.00469475	19	4	Up-regulated
Sus_scrofa___TRIB1	2.31224	5.25917	23.0402	4.37276e-05	0.00475795	19	4	Up-regulated
Sus_scrofa___C9orf72	1.87275	4.62783	22.9345	4.50911e-05	0.0048772	19	4	Up-regulated
Sus_scrofa___PFKFB3	5.65589	4.89149	22.9003	4.57315e-05	0.00491728	19	4	Up-regulated
Sus_scrofa___BTG3	2.5354	1.77776	22.8664	4.63381e-05	0.00495328	19	4	Up-regulated
Sus_scrofa___MTR	1.31049	5.78306	22.7588	4.74528e-05	0.00505761	19	4	Up-regulated
Sus_scrofa___SYTL3	1.7911	1.1904	22.7857	4.76209e-05	0.00506073	19	4	Up-regulated
Sus_scrofa___HIVEP2	1.3248	9.04501	22.565	5.02171e-05	0.00525995	19	4	Up-regulated
Sus_scrofa___ADGRG6	2.41474	4.84803	22.5362	5.06459e-05	0.00528966	19	4	Up-regulated
Sus_scrofa___ENSSSCG00000034015	2.53246	6.33702	22.4854	5.14027e-05	0.00531107	19	4	Up-regulated
Sus_scrofa___SAMD4A	1.11885	11.0729	22.4341	5.2181e-05	0.00537302	19	4	Up-regulated
Sus_scrofa___TAC4	2.24914	-0.199621	22.1942	5.54397e-05	0.0056606	19	4	Up-regulated
Sus_scrofa___ENSSSCG00000051243	1.88707	0.852281	22.1592	5.74826e-05	0.00583648	19	4	Up-regulated
Sus_scrofa___MAST4	1.44215	9.86354	21.9964	5.93708e-05	0.00595768	19	4	Up-regulated
Sus_scrofa___NLRC5	5.00803	6.31522	21.8185	6.26011e-05	0.00618394	19	4	Up-regulated
Sus_scrofa___OSMR	2.81643	5.08734	21.7646	6.36053e-05	0.00626615	19	4	Up-regulated
Sus_scrofa___DNAJA1	1.18993	3.87734	21.7061	6.47324e-05	0.00635203	19	4	Up-regulated
Sus_scrofa___YBX3	1.68765	8.31808	21.7006	6.48255e-05	0.00635203	19	4	Up-regulated
Sus_scrofa___SOAT1	1.55681	2.89453	21.6374	6.61137e-05	0.00644922	19	4	Up-regulated
Sus_scrofa___ANKRD1	1.89363	12.5391	21.5497	6.7814e-05	0.00650497	19	4	Up-regulated
Sus_scrofa___DES	2.14242	8.84269	21.4872	6.9095e-05	0.00659314	19	4	Up-regulated
Sus_scrofa___RFX3	1.39805	5.25605	21.3433	7.21434e-05	0.00684817	19	4	Up-regulated
Sus_scrofa___NPAS3	1.77446	6.64194	21.2695	7.37593e-05	0.00691626	19	4	Up-regulated
Sus_scrofa___SERPINB8	1.26365	3.061	21.2669	7.386e-05	0.00691626	19	4	Up-regulated
Sus_scrofa___INPP5F	1.83371	7.62092	21.1658	7.61014e-05	0.00706617	19	4	Up-regulated
Sus_scrofa___FBXO7	1.16499	6.33868	21.1591	7.62544e-05	0.00706617	19	4	Up-regulated
Sus_scrofa___FAM171B	3.20581	3.42926	21.0416	7.91074e-05	0.00725575	19	4	Up-regulated
Sus_scrofa___DRAM2	1.08675	3.2412	21.0341	7.92239e-05	0.00725575	19	4	Up-regulated
Sus_scrofa___PIM1	6.23425	2.55281	20.5608	8.0063e-05	0.00727775	19	4	Up-regulated
Sus_scrofa___SLC38A2	1.51251	7.88964	20.9732	8.06614e-05	0.00729575	19	4	Up-regulated
Sus_scrofa___PPP1R10	1.17088	5.72131	20.9171	8.20453e-05	0.00738428	19	4	Up-regulated
Sus_scrofa___EML5	1.11893	5.97331	20.8639	8.33795e-05	0.00742152	19	4	Up-regulated
Sus_scrofa___ETAA1	0.886602	4.20007	20.8524	8.36807e-05	0.00742152	19	4	Up-regulated
Sus_scrofa___DOCK9	1.48612	5.87496	20.8235	8.44093e-05	0.00746797	19	4	Up-regulated
Sus_scrofa___RAB9B	1.78553	4.49301	20.7807	8.55204e-05	0.00752126	19	4	Up-regulated
Sus_scrofa___ENSSSCG00000015390	3.72781	0.03044	20.2352	8.77039e-05	0.00766642	19	4	Up-regulated
Sus_scrofa___IL12RB2	1.96468	2.07094	20.6702	8.87221e-05	0.00769369	19	4	Up-regulated
Sus_scrofa___BHLHE41	7.11297	-0.349039	21.4349	8.91671e-05	0.00769369	19	4	Up-regulated
Sus_scrofa___MLXIP	1.09098	4.5353	20.637	8.93473e-05	0.00769369	19	4	Up-regulated
Sus_scrofa___TSC22D2	1.18357	8.13712	20.5518	9.1695e-05	0.00779108	19	4	Up-regulated
Sus_scrofa___CDC42EP2	2.62108	0.695586	20.5824	9.19628e-05	0.007795	19	4	Up-regulated
Sus_scrofa___SLC16A3	4.28992	2.73212	20.5386	9.26682e-05	0.007795	19	4	Up-regulated
Sus_scrofa___CEBPG	1.45099	3.93191	20.4666	9.41325e-05	0.00786978	19	4	Up-regulated
Sus_scrofa___REL	1.23048	5.71941	20.4298	9.51855e-05	0.00788075	19	4	Up-regulated
Sus_scrofa___AARS1	1.42469	5.85377	20.4168	9.55639e-05	0.00788075	19	4	Up-regulated
Sus_scrofa___ENSSSCG00000044138	3.79655	0.11266	19.9409	9.63755e-05	0.00788075	19	4	Up-regulated
Sus_scrofa___CEP152	1.17692	3.41781	20.3303	9.81643e-05	0.00798703	19	4	Up-regulated
Sus_scrofa___WFDC1	1.91021	7.13595	20.2897	9.93643e-05	0.00806666	19	4	Up-regulated
Sus_scrofa___EIF1AX	0.979833	4.30241	20.263	0.000100193	0.00808984	19	4	Up-regulated
Sus_scrofa___HOOK2	1.57527	5.81895	20.2598	0.000100285	0.00808984	19	4	Up-regulated
Sus_scrofa___ENSSSCG00000009338	1.26847	10.4857	20.2587	0.000100316	0.00808984	19	4	Up-regulated
Sus_scrofa___ENSSSCG00000038506	1.39537	6.19541	20.0372	0.000107409	0.00851434	19	4	Up-regulated
Sus_scrofa___ENSSSCG00000033786	1.80604	7.3117	20.0182	0.000108042	0.00852434	19	4	Up-regulated
Sus_scrofa___SYT11	1.96196	2.58236	20.0081	0.000108529	0.00852584	19	4	Up-regulated
Sus_scrofa___GAPDH	1.86682	5.95239	19.9584	0.000110062	0.00862769	19	4	Up-regulated
Sus_scrofa___IL5RA	5.92008	-0.208424	19.9646	0.000113363	0.00877354	19	4	Up-regulated
Sus_scrofa___CEBPD	7.89264	1.71782	19.9271	0.000113608	0.00877354	19	4	Up-regulated
Sus_scrofa___NIPAL1	3.39949	2.43231	19.8102	0.000115856	0.0089026	19	4	Up-regulated
Sus_scrofa___ANKRD2	4.20249	4.37077	19.7691	0.000116841	0.00894733	19	4	Up-regulated
Sus_scrofa___ACTG1	1.52136	8.29899	19.759	0.000117085	0.00894733	19	4	Up-regulated
Sus_scrofa___KCNQ5	2.57711	5.32468	19.7061	0.000119035	0.00903351	19	4	Up-regulated
Sus_scrofa___MGAT3	2.329	-0.263651	19.646	0.000119204	0.00903351	19	4	Up-regulated
Sus_scrofa___RAB2A	0.973211	8.41839	19.5709	0.000124157	0.00929294	19	4	Up-regulated
Sus_scrofa___KATNBL1	2.49557	8.75717	19.4989	0.000126985	0.00944637	19	4	Up-regulated
Sus_scrofa___CTNND1	0.976372	8.16015	19.2433	0.000137589	0.0100708	19	4	Up-regulated
Sus_scrofa___CDYL2	1.18309	4.29985	19.217	0.000138744	0.0100945	19	4	Up-regulated
Sus_scrofa___HMOX1	4.31342	0.226103	18.5391	0.000142484	0.0102642	19	4	Up-regulated
Sus_scrofa___IGFBP2	6.22986	3.93868	19.1097	0.000143	0.010281	19	4	Up-regulated
Sus_scrofa___KLF7	1.82662	5.98589	19.0536	0.000146074	0.0104608	19	4	Up-regulated
Sus_scrofa___TNFAIP3	2.41755	2.18791	19.0358	0.000147365	0.0105119	19	4	Up-regulated
Sus_scrofa___FOSL2	1.40606	4.69114	18.973	0.000149852	0.0106477	19	4	Up-regulated
Sus_scrofa___ROCK2	1.57934	9.90761	18.9366	0.000151581	0.0107079	19	4	Up-regulated
Sus_scrofa___BLNK	2.69001	0.591902	18.9451	0.000152359	0.0107213	19	4	Up-regulated
Sus_scrofa___FLRT3	2.82805	0.0965425	18.8098	0.000154892	0.0108392	19	4	Up-regulated
Sus_scrofa___NRCAM	4.12614	6.16459	18.8679	0.000154927	0.0108392	19	4	Up-regulated
Sus_scrofa___ENSSSCG00000037376	1.52848	6.24743	18.786	0.000159006	0.011061	19	4	Up-regulated
Sus_scrofa___ENSSSCG00000023771	2.10698	2.8991	18.7233	0.000162346	0.011178	19	4	Up-regulated
Sus_scrofa___STX7	0.768402	5.86732	18.7174	0.000162517	0.011178	19	4	Up-regulated
Sus_scrofa___FLT3	1.21896	0.797404	18.7472	0.000162835	0.011178	19	4	Up-regulated
Sus_scrofa___ENSSSCG00000015823	2.43754	1.31238	18.7228	0.000163769	0.0112209	19	4	Up-regulated
Sus_scrofa___SORBS3	1.93331	5.41993	18.6738	0.000164791	0.0112487	19	4	Up-regulated
Sus_scrofa___SUSD1	1.28342	4.33547	18.6281	0.000167224	0.0113321	19	4	Up-regulated
Sus_scrofa___HSPB6	2.24467	4.87541	18.6219	0.000167547	0.0113321	19	4	Up-regulated
Sus_scrofa___RASSF1	2.12355	4.01391	18.6219	0.000167567	0.0113321	19	4	Up-regulated
Sus_scrofa___AREG	4.50363	2.28646	18.5111	0.000173309	0.0116341	19	4	Up-regulated
Sus_scrofa___HIPK2	1.21035	10.1066	18.5037	0.000173992	0.0116512	19	4	Up-regulated
Sus_scrofa___BCL6	1.14172	4.77391	18.4648	0.000176179	0.0117188	19	4	Up-regulated
Sus_scrofa___PLAGL1	1.08378	7.499	18.4316	0.000178055	0.011787	19	4	Up-regulated
Sus_scrofa___GCNT3	3.19664	5.10449	18.4185	0.000178821	0.011787	19	4	Up-regulated
Sus_scrofa___STUM	3.2059	-0.122299	18.1216	0.000181593	0.0119481	19	4	Up-regulated
Sus_scrofa___SRF	1.64792	4.57373	18.3083	0.000185255	0.0120251	19	4	Up-regulated
Sus_scrofa___ENSSSCG00000007735	1.09046	6.53481	18.2959	0.000185987	0.0120251	19	4	Up-regulated
Sus_scrofa___ENSSSCG00000011729	1.36268	7.00386	18.2501	0.00018875	0.0121061	19	4	Up-regulated
Sus_scrofa___VEZF1	0.714209	6.3528	18.2375	0.000189516	0.0121194	19	4	Up-regulated
Sus_scrofa___CCDC180	2.41644	5.73688	18.1952	0.000192121	0.012243	19	4	Up-regulated
Sus_scrofa___PRRG4	3.47085	-0.0225468	17.8617	0.000194487	0.0123689	19	4	Up-regulated
Sus_scrofa___HSPA1L	1.32017	0.647675	18.1235	0.000199105	0.0125666	19	4	Up-regulated
Sus_scrofa___SPATA6	1.48645	1.63472	18.0951	0.000199254	0.0125666	19	4	Up-regulated
Sus_scrofa___SLCO6A1	4.09096	8.17535	18.082	0.000199268	0.0125666	19	4	Up-regulated
Sus_scrofa___ITGB8	1.92765	7.76623	18.0436	0.00020176	0.0127018	19	4	Up-regulated
Sus_scrofa___DDX3X	1.28558	6.71264	18.0237	0.000203065	0.0127376	19	4	Up-regulated
Sus_scrofa___ACTR3	0.760719	6.25531	18.0115	0.000203864	0.0127376	19	4	Up-regulated
Sus_scrofa___CLIC4	1.59895	9.46099	18.0083	0.000204076	0.0127376	19	4	Up-regulated
Sus_scrofa___LAMA3	1.27675	2.31629	17.9457	0.000208558	0.0129951	19	4	Up-regulated
Sus_scrofa___SEC23B	0.940333	4.70929	17.9249	0.000209676	0.0130276	19	4	Up-regulated
Sus_scrofa___TRIM26	3.01068	3.76065	17.9246	0.000209794	0.0130276	19	4	Up-regulated
Sus_scrofa___ENSSSCG00000029857	0.848457	4.60404	17.9116	0.000210588	0.0130325	19	4	Up-regulated
Sus_scrofa___ZDHHC14	4.26938	5.09983	17.8951	0.000211778	0.013056	19	4	Up-regulated
Sus_scrofa___AXDND1	1.54947	2.01998	17.8828	0.000213052	0.0130961	19	4	Up-regulated
Sus_scrofa___PNRC1	0.939669	6.76139	17.8235	0.000216691	0.013275	19	4	Up-regulated
Sus_scrofa___CCSER1	2.58149	5.36699	17.8167	0.00021718	0.0132826	19	4	Up-regulated
Sus_scrofa___CDH24	2.09451	0.49396	17.8447	0.00021825	0.0132873	19	4	Up-regulated
Sus_scrofa___EREG	2.41037	1.15726	17.8254	0.000218773	0.0132873	19	4	Up-regulated
Sus_scrofa___SLCO4C1	2.94322	3.58887	17.7947	0.000218866	0.0132873	19	4	Up-regulated
Sus_scrofa___ENSSSCG00000022925	1.81623	7.1909	17.7853	0.000219403	0.0132873	19	4	Up-regulated
Sus_scrofa___NAB2	2.50922	0.343132	17.7692	0.000222002	0.0133535	19	4	Up-regulated
Sus_scrofa___EDAR	2.61211	-1.23119	17.0168	0.000223234	0.0133843	19	4	Up-regulated
Sus_scrofa___RIPPLY1	1.85714	1.68386	17.7455	0.000223249	0.0133843	19	4	Up-regulated
Sus_scrofa___REEP2	1.46888	0.976506	17.6796	0.000229252	0.0136321	19	4	Up-regulated
Sus_scrofa___ANXA5	1.50507	5.36072	17.609	0.000232395	0.0137517	19	4	Up-regulated
Sus_scrofa___ENSSSCG00000023041	2.77929	5.18071	17.5974	0.000233284	0.0137819	19	4	Up-regulated
Sus_scrofa___CD200R1	2.94049	-0.771407	17.1116	0.000233786	0.0137892	19	4	Up-regulated
Sus_scrofa___TSPEAR	1.892	0.491173	17.6176	0.000235131	0.0138238	19	4	Up-regulated
Sus_scrofa___FHL1	1.39522	9.20697	17.549	0.000237	0.0138757	19	4	Up-regulated
Sus_scrofa___DAPK3	1.47504	6.63735	17.548	0.000237078	0.0138757	19	4	Up-regulated
Sus_scrofa___TTPAL	0.970678	2.56374	17.5498	0.000237156	0.0138757	19	4	Up-regulated
Sus_scrofa___PRDX6	1.78226	3.67632	17.528	0.000238689	0.0138829	19	4	Up-regulated
Sus_scrofa___GAN	1.46415	6.38249	17.5259	0.000238801	0.0138829	19	4	Up-regulated
Sus_scrofa___ERBB3	1.68446	3.72878	17.4816	0.000242338	0.0140214	19	4	Up-regulated
Sus_scrofa___PLCG2	2.49291	1.93099	17.4856	0.000243006	0.014027	19	4	Up-regulated
Sus_scrofa___MYEF2	1.78011	2.93196	17.472	0.000243205	0.014027	19	4	Up-regulated
Sus_scrofa___ARHGAP23	0.899009	6.15734	17.447	0.000245061	0.0140869	19	4	Up-regulated
Sus_scrofa___PPP1R18	3.43438	1.01408	17.4343	0.000245402	0.0140869	19	4	Up-regulated
Sus_scrofa___CASQ2	0.827565	9.49705	17.3796	0.000250542	0.0143107	19	4	Up-regulated
Sus_scrofa___ENSSSCG00000021200	1.16623	8.77532	17.3698	0.000251351	0.0143107	19	4	Up-regulated
Sus_scrofa___CDKN3	1.36526	2.89056	17.3379	0.000254153	0.0143498	19	4	Up-regulated
Sus_scrofa___FGF5	2.06953	1.48746	17.3527	0.000254313	0.0143498	19	4	Up-regulated
Sus_scrofa___NOCT	1.07482	5.62985	17.3139	0.00025602	0.0143967	19	4	Up-regulated
Sus_scrofa___BAG3	1.41862	6.80669	17.2092	0.00026501	0.0146896	19	4	Up-regulated
Sus_scrofa___GRK6	0.954847	3.97395	17.2067	0.000265254	0.0146896	19	4	Up-regulated
Sus_scrofa___PTAFR	2.08146	-0.613398	17.0894	0.000265517	0.0146896	19	4	Up-regulated
Sus_scrofa___HES1	2.32797	3.1769	17.1963	0.000266295	0.0147071	19	4	Up-regulated
Sus_scrofa___RPS6KA3	1.13626	7.60398	17.1682	0.00026862	0.0147907	19	4	Up-regulated
Sus_scrofa___PFKP	1.79362	4.29714	17.1532	0.000269976	0.0148206	19	4	Up-regulated
Sus_scrofa___DEPDC1B	1.70474	2.90897	17.1264	0.000272526	0.0149381	19	4	Up-regulated
Sus_scrofa___ENSSSCG00000001396	3.41753	-0.621793	16.5502	0.000278261	0.0152067	19	4	Up-regulated
Sus_scrofa___PPARG	3.00944	4.4211	17.0325	0.000281003	0.015305	19	4	Up-regulated
Papio_anubis_ACTA1	3.05363	1.90234	16.9994	0.000285752	0.0154565	19	4	Up-regulated
Sus_scrofa___KDM3A	1.40759	6.75503	16.981	0.0002858	0.0154565	19	4	Up-regulated
Sus_scrofa___ENSSSCG00000003421	1.5994	3.39285	16.9638	0.000287517	0.0155168	19	4	Up-regulated
Sus_scrofa___ENSSSCG00000047500	1.51965	1.67483	16.9711	0.000287766	0.0155168	19	4	Up-regulated
Sus_scrofa___ELF4	2.94716	0.914928	16.9363	0.000292017	0.0156534	19	4	Up-regulated
Sus_scrofa___ENSSSCG00000034570	10.7538	6.04135	16.2238	0.000296304	0.0157213	19	4	Up-regulated
Sus_scrofa___TIAM2	1.32105	7.0928	16.8543	0.000298087	0.0157921	19	4	Up-regulated
Sus_scrofa___RTL5	1.92326	-0.755583	16.7097	0.000298503	0.0157921	19	4	Up-regulated
Sus_scrofa___MASP2	2.62692	4.21422	16.8253	0.000301033	0.0158904	19	4	Up-regulated
Sus_scrofa___MAFF	4.17779	4.04625	16.8224	0.00030167	0.0158904	19	4	Up-regulated
Sus_scrofa___ENSSSCG00000050527	4.77822	-2.12469	16.0355	0.000303099	0.0159427	19	4	Up-regulated
Sus_scrofa___ENSSSCG00000028531	2.33113	-1.63013	15.8559	0.000304299	0.0159597	19	4	Up-regulated
Sus_scrofa___SPRY4	4.55612	-2.29428	15.817	0.000306109	0.0160304	19	4	Up-regulated
Sus_scrofa___ENAH	1.36999	9.11671	16.7447	0.000309186	0.0161232	19	4	Up-regulated
Sus_scrofa___DPYD	1.17981	7.56383	16.7324	0.000310452	0.0161381	19	4	Up-regulated
Sus_scrofa___MYH6	3.59939	9.49818	16.7312	0.000310585	0.0161381	19	4	Up-regulated
Sus_scrofa___CCNB1IP1	0.749836	4.78688	16.7275	0.000310972	0.0161381	19	4	Up-regulated
Sus_scrofa___ADAMTS1	3.3816	5.60611	16.6859	0.000315333	0.0162274	19	4	Up-regulated
Sus_scrofa___DPYSL3	1.2999	8.85715	16.676	0.000316359	0.0162417	19	4	Up-regulated
Sus_scrofa___MMP25	4.99597	2.48445	16.644	0.00031693	0.0162481	19	4	Up-regulated
Sus_scrofa___ATP2B4	1.14849	8.91628	16.6575	0.000318322	0.0162965	19	4	Up-regulated
Sus_scrofa___STAT4	1.45562	0.470563	16.6886	0.000319216	0.0162965	19	4	Up-regulated
Sus_scrofa___ISG15	11.4958	5.95331	16.2079	0.000320145	0.0162972	19	4	Up-regulated
Sus_scrofa___ENSSSCG00000012427	4.17107	2.38775	16.6535	0.000320195	0.0162972	19	4	Up-regulated
Sus_scrofa___INHBA	5.29016	2.05141	16.4758	0.000321464	0.0162972	19	4	Up-regulated
Sus_scrofa___SESN2	4.3059	3.56102	16.6025	0.000325177	0.0163942	19	4	Up-regulated
Sus_scrofa___CTSB	1.33693	5.15311	16.5768	0.000327049	0.016437	19	4	Up-regulated
Sus_scrofa___ACTB	1.02262	7.34982	16.5738	0.000327378	0.016437	19	4	Up-regulated
Sus_scrofa___KLF4	2.63481	1.42122	16.5679	0.000330582	0.0165496	19	4	Up-regulated
Sus_scrofa___BICDL2	3.45137	1.85665	16.5434	0.000332736	0.0165914	19	4	Up-regulated
Sus_scrofa___IRAK3	1.89766	3.83133	16.5219	0.000333185	0.0165914	19	4	Up-regulated
Sus_scrofa___WWC1	2.54868	5.92751	16.5021	0.000335348	0.016657	19	4	Up-regulated
Sus_scrofa___SPAG1	1.25934	3.19131	16.5025	0.000335415	0.016657	19	4	Up-regulated
Sus_scrofa___EGR1	5.61873	2.70951	16.4036	0.000336826	0.0167043	19	4	Up-regulated
Sus_scrofa___ABHD12	0.658608	4.88565	16.4541	0.000340803	0.0168786	19	4	Up-regulated
Sus_scrofa___PPP2CB	0.634626	6.7845	16.4219	0.000344509	0.0169693	19	4	Up-regulated
Sus_scrofa___CHSY1	1.18742	5.19523	16.4201	0.000344724	0.0169693	19	4	Up-regulated
Sus_scrofa___ARHGAP15	2.44443	1.43798	16.4388	0.000344941	0.0169693	19	4	Up-regulated
Sus_scrofa___MET	2.44122	0.536143	16.4432	0.00034546	0.0169708	19	4	Up-regulated
Sus_scrofa___SSBP2	1.03894	9.59105	16.3378	0.000354403	0.0172936	19	4	Up-regulated
Sus_scrofa___ENSSSCG00000003079	3.30317	4.02338	16.2712	0.00036261	0.0175999	19	4	Up-regulated
Sus_scrofa___CFAP251	1.90462	2.65989	16.2239	0.000368646	0.0177981	19	4	Up-regulated
Sus_scrofa___FRRS1L	1.69798	0.0720866	16.2417	0.00037069	0.017873	19	4	Up-regulated
Sus_scrofa___CLIC2	3.7395	-1.06637	15.5229	0.000371937	0.0179095	19	4	Up-regulated
Sus_scrofa___KDELR3	2.64284	1.59744	16.1777	0.000376489	0.0181047	19	4	Up-regulated
Sus_scrofa___BACE2	1.42873	7.06746	16.142	0.00037866	0.018118	19	4	Up-regulated
Sus_scrofa___ST8SIA2	3.24793	-1.19309	15.4143	0.000381256	0.0181701	19	4	Up-regulated
Sus_scrofa___RNF115	1.02273	7.84021	16.1144	0.000382218	0.0181701	19	4	Up-regulated
Sus_scrofa___GPR137B	1.5548	2.6053	16.1154	0.00038241	0.0181701	19	4	Up-regulated
Sus_scrofa___SPRED2	1.74796	6.37728	16.1096	0.000382834	0.0181701	19	4	Up-regulated
Sus_scrofa___BIN1	1.80146	2.15291	16.0824	0.000387094	0.0183009	19	4	Up-regulated
Sus_scrofa___ESAM	3.01958	-0.907486	15.548	0.00039144	0.0184386	19	4	Up-regulated
Sus_scrofa___GADD45A	1.57232	3.55909	16.0341	0.000392857	0.018446	19	4	Up-regulated
Sus_scrofa___REC8	3.84874	0.787548	15.9267	0.0003932	0.018446	19	4	Up-regulated
Sus_scrofa___CHP1	0.797789	4.95983	16.0222	0.000394375	0.0184773	19	4	Up-regulated
Sus_scrofa___SMPX	1.07314	7.82412	15.951	0.00040404	0.0188093	19	4	Up-regulated
Sus_scrofa___ENSSSCG00000006525	2.96977	-1.96168	14.8913	0.000411237	0.0191199	19	4	Up-regulated
Sus_scrofa___SLC36A4	0.993101	5.33705	15.8604	0.000416706	0.0192027	19	4	Up-regulated
Sus_scrofa___MCAM	2.01939	3.79302	15.8499	0.000418272	0.0192505	19	4	Up-regulated
Sus_scrofa___SF3B6	0.994604	4.04753	15.8283	0.000421336	0.0193325	19	4	Up-regulated
Sus_scrofa___ENSSSCG00000010212	0.934484	12.0414	15.8136	0.00042342	0.01936	19	4	Up-regulated
Sus_scrofa___HNRNPH2	1.65117	2.29658	15.8147	0.000423838	0.01936	19	4	Up-regulated
Sus_scrofa___SPIDR	2.7618	6.50887	15.7872	0.000427263	0.0194677	19	4	Up-regulated
Sus_scrofa___C8orf89	1.86885	0.568806	15.8016	0.000430378	0.0195607	19	4	Up-regulated
Sus_scrofa___ENSSSCG00000024009	4.44551	-1.4331	15.5119	0.00043366	0.0196451	19	4	Up-regulated
Sus_scrofa___ENSSSCG00000046153	1.9728	5.32196	15.7408	0.000434106	0.0196451	19	4	Up-regulated
Sus_scrofa___DAPK1	1.43323	8.59973	15.6994	0.00044029	0.0198381	19	4	Up-regulated
Papio_anubis_ENSPANG00000017966	2.76681	0.964427	15.6966	0.000444325	0.0199633	19	4	Up-regulated
Sus_scrofa___RIMKLA	2.38077	0.461326	15.6951	0.000445186	0.0199633	19	4	Up-regulated
Sus_scrofa___TECPR1	1.91212	4.15355	15.5947	0.000456438	0.0202651	19	4	Up-regulated
Sus_scrofa___KAZN	1.01981	4.51466	15.5874	0.000457568	0.0202905	19	4	Up-regulated
Sus_scrofa___STX11	2.21716	3.042	15.4892	0.000473519	0.020715	19	4	Up-regulated
Sus_scrofa___CTSL	2.3881	-0.341678	15.4087	0.000475544	0.020715	19	4	Up-regulated
Sus_scrofa___ROR1	1.2252	11.4154	15.4745	0.000475665	0.020715	19	4	Up-regulated
Sus_scrofa___KDM4C	0.88285	8.55434	15.419	0.000484849	0.0209034	19	4	Up-regulated
Sus_scrofa___CASP3	0.95003	5.35912	15.4149	0.000485549	0.0209034	19	4	Up-regulated
Sus_scrofa___ENSSSCG00000012006	2.95541	4.4339	15.4116	0.000486164	0.0209034	19	4	Up-regulated
Sus_scrofa___ENSSSCG00000035037	2.9984	5.41804	15.3862	0.000490387	0.0210295	19	4	Up-regulated
Sus_scrofa___TP53I11	3.62907	0.423685	15.251	0.000493233	0.0211019	19	4	Up-regulated
Sus_scrofa___HACD4	2.26692	-1.32577	14.8339	0.00049439	0.0211266	19	4	Up-regulated
Sus_scrofa___CRELD2	1.96654	0.382347	15.3884	0.000495862	0.0211647	19	4	Up-regulated
Sus_scrofa___SEPTIN10	0.929131	4.73252	15.3406	0.000498177	0.0211799	19	4	Up-regulated
Sus_scrofa___TLL2	2.36619	4.04448	15.3359	0.000499037	0.0211799	19	4	Up-regulated
Sus_scrofa___PAM	1.12313	10.4885	15.3307	0.000499863	0.0211799	19	4	Up-regulated
Sus_scrofa___RPL37A	3.11667	4.11084	15.3296	0.000500186	0.0211799	19	4	Up-regulated
Sus_scrofa___PIP4K2A	1.53569	5.74279	15.3283	0.000500286	0.0211799	19	4	Up-regulated
Sus_scrofa___MCF2	1.41748	0.535124	15.3478	0.000502537	0.0212505	19	4	Up-regulated
Sus_scrofa___TP53INP2	1.24477	3.88706	15.2856	0.000507795	0.021412	19	4	Up-regulated
Sus_scrofa___FUT11	1.35193	2.9626	15.26	0.000512471	0.0215511	19	4	Up-regulated
Sus_scrofa___METTL9	0.758806	5.61669	15.189	0.000525037	0.0218223	19	4	Up-regulated
Sus_scrofa___BZW2	0.817712	7.8732	15.169	0.000528676	0.0218738	19	4	Up-regulated
Sus_scrofa___NR1D1	1.31235	2.87005	15.1645	0.000529766	0.0218738	19	4	Up-regulated
Sus_scrofa___ENSSSCG00000010448	1.39054	4.50275	15.1311	0.000535724	0.0220472	19	4	Up-regulated
Sus_scrofa___PHF20L1	0.625752	7.54469	15.13	0.000535893	0.0220472	19	4	Up-regulated
Sus_scrofa___SNAPC1	1.67429	7.37614	15.1248	0.000536869	0.0220625	19	4	Up-regulated
Sus_scrofa___MACROD2	1.53015	7.20714	15.1119	0.000539285	0.0221119	19	4	Up-regulated
Sus_scrofa___LBR	2.22549	0.594371	15.1208	0.000543333	0.022203	19	4	Up-regulated
Sus_scrofa___CAPZA1	0.544627	6.64607	15.0287	0.000555128	0.0225585	19	4	Up-regulated
Sus_scrofa___ZNF18	0.844363	3.33448	15.0127	0.000558358	0.02264	19	4	Up-regulated
Sus_scrofa___BCLAF1	0.697133	6.69669	15.0005	0.000560611	0.0226802	19	4	Up-regulated
Sus_scrofa___PHF21B	1.55839	3.91138	14.9925	0.000562243	0.0226979	19	4	Up-regulated
Sus_scrofa___TRAIP	1.62876	2.87955	14.9868	0.000563602	0.0227255	19	4	Up-regulated
Sus_scrofa___PGK1	1.1071	5.36005	14.9805	0.000564555	0.0227388	19	4	Up-regulated
Sus_scrofa___AK4	4.32294	3.42183	14.9675	0.000568779	0.0228836	19	4	Up-regulated
Sus_scrofa___PPRC1	1.09561	3.80617	14.9471	0.000571238	0.0229572	19	4	Up-regulated
Sus_scrofa___RND3	1.34962	6.34013	14.9391	0.000572762	0.0229931	19	4	Up-regulated
Sus_scrofa___MTFR1	1.157	4.76801	14.9248	0.000575659	0.023084	19	4	Up-regulated
Sus_scrofa___MKLN1	0.561911	8.4725	14.9093	0.000578769	0.0231577	19	4	Up-regulated
Sus_scrofa___TRIM72	2.25152	1.43946	14.9003	0.000583889	0.0233114	19	4	Up-regulated
Sus_scrofa___ENSSSCG00000044700	1.34783	8.24354	14.8485	0.000591212	0.0235265	19	4	Up-regulated
Sus_scrofa___NCBP1	1.06355	8.72706	14.8181	0.000597527	0.0237002	19	4	Up-regulated
Sus_scrofa___SCD	6.87296	-0.529175	15.2228	0.000599615	0.0237571	19	4	Up-regulated
Sus_scrofa___MAP2	1.91262	0.258712	14.8113	0.000605768	0.0239488	19	4	Up-regulated
Sus_scrofa___RPLP0	2.28482	3.92341	14.7682	0.000608185	0.0239971	19	4	Up-regulated
Sus_scrofa___TM4SF18	3.64162	-1.97485	14.1156	0.000608306	0.0239971	19	4	Up-regulated
Sus_scrofa___ENSSSCG00000039009	1.41433	3.28385	14.7604	0.000609915	0.0240346	19	4	Up-regulated
Sus_scrofa___BMT2	0.798532	6.94299	14.7552	0.000610859	0.0240458	19	4	Up-regulated
Sus_scrofa___ATP2B1	1.17655	5.65062	14.7377	0.000614625	0.0241419	19	4	Up-regulated
Sus_scrofa___C1RL	1.69246	1.3347	14.6842	0.000629451	0.0245681	19	4	Up-regulated
Sus_scrofa___TSPYL2	1.50074	2.90956	14.6437	0.000635572	0.0247625	19	4	Up-regulated
Sus_scrofa___TMEM212	3.50123	-2.05784	13.9085	0.000635859	0.0247625	19	4	Up-regulated
Sus_scrofa___ROBO1	2.65839	6.87957	14.636	0.000637009	0.0247707	19	4	Up-regulated
Sus_scrofa___PARP12	5.71543	5.70214	14.6335	0.000638108	0.0247707	19	4	Up-regulated
Sus_scrofa___HSPA13	1.43629	2.53296	14.6171	0.000641773	0.0248681	19	4	Up-regulated
Sus_scrofa___CREM	1.86985	6.73813	14.596	0.000646056	0.024927	19	4	Up-regulated
Sus_scrofa___ME1	1.38771	5.30343	14.5943	0.000646437	0.024927	19	4	Up-regulated
Sus_scrofa___ENSSSCG00000008898	5.35837	0.681652	14.0982	0.000647971	0.024927	19	4	Up-regulated
Sus_scrofa___ENSSSCG00000040779	2.77378	0.644019	14.6014	0.000647981	0.024927	19	4	Up-regulated
Sus_scrofa___SARNP	1.14077	0.949217	14.6051	0.000648391	0.024927	19	4	Up-regulated
Sus_scrofa___ZNFX1	2.96127	5.66153	14.5833	0.000648973	0.024927	19	4	Up-regulated
Sus_scrofa___ENSSSCG00000022032	1.23467	7.14668	14.5715	0.000651657	0.0250037	19	4	Up-regulated
Sus_scrofa___ENSSSCG00000009754	1.13636	2.69799	14.5231	0.000663283	0.0253166	19	4	Up-regulated
Sus_scrofa___SLC1A5	4.15612	-1.13393	14.0973	0.00066551	0.025375	19	4	Up-regulated
Sus_scrofa___IFIH1	6.17309	6.27699	14.5003	0.000668704	0.0254701	19	4	Up-regulated
Sus_scrofa___SORCS1	1.33024	2.38354	14.4904	0.000671239	0.02554	19	4	Up-regulated
Sus_scrofa___ENSSSCG00000003520	0.63251	6.90505	14.4836	0.000672201	0.0255489	19	4	Up-regulated
Sus_scrofa___TOPAZ1	0.848383	7.04029	14.4647	0.000676711	0.0255846	19	4	Up-regulated
Sus_scrofa___ENSSSCG00000015795	1.85848	2.57386	14.4587	0.000678728	0.0255846	19	4	Up-regulated
Sus_scrofa___MYC	2.21731	2.4103	14.4394	0.000683723	0.0257463	19	4	Up-regulated
Sus_scrofa___RCAN1	1.30065	8.44541	14.4196	0.000687592	0.0257481	19	4	Up-regulated
Sus_scrofa___KPNA4	0.746187	7.15439	14.4174	0.000688131	0.0257481	19	4	Up-regulated
Sus_scrofa___C16orf89	1.81558	-0.00221296	14.4418	0.000688504	0.0257481	19	4	Up-regulated
Sus_scrofa___NSF	0.792506	7.49904	14.4084	0.00069033	0.0257556	19	4	Up-regulated
Sus_scrofa___PAWR	2.12835	2.58108	14.4059	0.000691593	0.0257763	19	4	Up-regulated
Papio_anubis_DES	3.71434	-1.94185	13.7983	0.000697913	0.0259853	19	4	Up-regulated
Sus_scrofa___ENSSSCG00000004261	5.22612	-0.839787	14.3714	0.000701401	0.026062	19	4	Up-regulated
Sus_scrofa___PRMT2	1.35355	9.4381	14.3221	0.000711799	0.0263677	19	4	Up-regulated
Sus_scrofa___GLCCI1	1.18848	4.61032	14.3094	0.000715025	0.0263922	19	4	Up-regulated
Sus_scrofa___FRYL	0.719368	7.27075	14.308	0.000715357	0.0263922	19	4	Up-regulated
Sus_scrofa___LLGL2	2.26214	-0.239431	14.2712	0.000718893	0.0264958	19	4	Up-regulated
Sus_scrofa___SPRY1	2.35779	3.38506	14.2829	0.000722011	0.026557	19	4	Up-regulated
Sus_scrofa___CDKL2	2.05163	0.978542	14.2735	0.000729988	0.0267694	19	4	Up-regulated
Sus_scrofa___PNLIP	2.12677	-1.93567	13.3034	0.000732741	0.0268296	19	4	Up-regulated
Sus_scrofa___DYNLRB2	1.48476	1.35311	14.2269	0.000739467	0.0270083	19	4	Up-regulated
Sus_scrofa___EMP1	5.43065	-0.033085	13.8963	0.000743122	0.0271059	19	4	Up-regulated
Sus_scrofa___EHBP1	1.79527	11.1363	14.1791	0.000748929	0.0272719	19	4	Up-regulated
Sus_scrofa___ENSSSCG00000038667	5.00742	-1.96976	13.7457	0.000755007	0.0274658	19	4	Up-regulated
Sus_scrofa___BNIP3L	1.17829	5.28873	14.1261	0.000763241	0.027669	19	4	Up-regulated
Sus_scrofa___OSTF1	1.77828	6.17455	14.1199	0.000764932	0.027669	19	4	Up-regulated
Sus_scrofa___ZFHX2	1.86544	-0.0505178	14.1372	0.000765837	0.027669	19	4	Up-regulated
Sus_scrofa___TLR6	3.17058	-1.82519	13.3845	0.000769424	0.0276863	19	4	Up-regulated
Sus_scrofa___IL1RAP	2.19851	0.710602	14.1148	0.000773558	0.0277803	19	4	Up-regulated
Sus_scrofa___RPL24	1.22264	4.72077	14.0811	0.000775618	0.0278087	19	4	Up-regulated
Sus_scrofa___NFKBIZ	3.10906	-0.531139	13.8328	0.000775877	0.0278087	19	4	Up-regulated
Sus_scrofa___ENSSSCG00000051461	3.00953	0.417957	14.056	0.000776792	0.0278142	19	4	Up-regulated
Sus_scrofa___CNKSR2	1.02888	8.08589	14.0188	0.000793078	0.028334	19	4	Up-regulated
Sus_scrofa___DUSP4	4.66454	1.94081	13.9733	0.000793641	0.028334	19	4	Up-regulated
Sus_scrofa___ENSSSCG00000009341	0.590129	8.6886	14.0095	0.00079571	0.0283682	19	4	Up-regulated
Sus_scrofa___ENSSSCG00000049923	2.35144	-1.303	13.5757	0.000797134	0.0283753	19	4	Up-regulated
Sus_scrofa___DUSP10	2.02109	3.36967	14.0012	0.000798313	0.0283809	19	4	Up-regulated
Sus_scrofa___NETO2	1.91844	2.45136	14.0013	0.000798847	0.0283809	19	4	Up-regulated
Sus_scrofa___ENSSSCG00000017235	3.00622	-2.34483	13.0378	0.000807319	0.0286261	19	4	Up-regulated
Sus_scrofa___MFHAS1	1.24459	8.33207	13.9592	0.0008102	0.0286841	19	4	Up-regulated
Sus_scrofa___IL13RA2	1.16995	0.936977	13.9676	0.000813041	0.0287172	19	4	Up-regulated
Sus_scrofa___ENSSSCG00000017734	2.10311	1.50531	13.9527	0.000815722	0.028784	19	4	Up-regulated
Sus_scrofa___RAB11FIP5	1.38209	2.94465	13.9328	0.000818212	0.0288439	19	4	Up-regulated
Sus_scrofa___ENSSSCG00000048901	2.29627	-0.229753	13.9064	0.000819371	0.0288569	19	4	Up-regulated
Sus_scrofa___ASCC3	0.767528	7.57529	13.9192	0.000821902	0.0289181	19	4	Up-regulated
Sus_scrofa___RNASEH2B	0.883299	3.75415	13.9072	0.00082554	0.0289752	19	4	Up-regulated
Sus_scrofa___USP18	4.74068	5.95163	13.8787	0.000834059	0.02911	19	4	Up-regulated
Sus_scrofa___ENSSSCG00000010531	0.830644	5.24971	13.8378	0.000846293	0.029352	19	4	Up-regulated
Sus_scrofa___ACKR3	5.38724	2.45569	13.7728	0.000847117	0.029352	19	4	Up-regulated
Sus_scrofa___FBXO4	0.708003	5.86893	13.8188	0.000852112	0.0293854	19	4	Up-regulated
Sus_scrofa___TXNRD1	1.00348	6.66582	13.7599	0.000870378	0.0299586	19	4	Up-regulated
Sus_scrofa___MED12L	1.57146	4.36035	13.7571	0.000871294	0.0299618	19	4	Up-regulated
Sus_scrofa___SGTB	1.00405	2.73225	13.7498	0.000873986	0.0300261	19	4	Up-regulated
Sus_scrofa___IL25	3.41055	-0.218779	13.509	0.000876572	0.0300865	19	4	Up-regulated
Sus_scrofa___ADM	4.92864	1.5853	13.5992	0.000881225	0.0301611	19	4	Up-regulated
Sus_scrofa___MAGI1	1.6211	8.73147	13.721	0.00088266	0.0301818	19	4	Up-regulated
Sus_scrofa___INHBC	2.02322	-1.52071	13.1769	0.000890829	0.030319	19	4	Up-regulated
Sus_scrofa___CCDC68	2.76641	-1.54475	13.0243	0.000902017	0.0305855	19	4	Up-regulated
Sus_scrofa___PTGES3	0.658037	6.3822	13.6567	0.000903398	0.0306039	19	4	Up-regulated
Sus_scrofa___SRXN1	3.32899	2.87768	13.6548	0.000905662	0.0306521	19	4	Up-regulated
Sus_scrofa___CGNL1	3.73623	1.87966	13.6282	0.000915967	0.0309147	19	4	Up-regulated
Sus_scrofa___ARSB	2.1456	0.756958	13.6121	0.000926211	0.0310878	19	4	Up-regulated
Sus_scrofa___CHMP4B	1.15778	6.46449	13.5697	0.000932291	0.0312631	19	4	Up-regulated
Sus_scrofa___NCAPD2	0.73936	4.45638	13.5521	0.000938309	0.0313783	19	4	Up-regulated
Sus_scrofa___C15orf39	1.95803	1.91857	13.5432	0.000943353	0.0314782	19	4	Up-regulated
Sus_scrofa___XPR1	1.64945	8.36712	13.5283	0.000946392	0.031481	19	4	Up-regulated
Sus_scrofa___RELB	1.3152	3.99123	13.5281	0.000946564	0.031481	19	4	Up-regulated
Sus_scrofa___ARL4C	2.65211	0.293252	13.5227	0.000948174	0.0314896	19	4	Up-regulated
Sus_scrofa___APOLD1	4.22797	-2.43687	12.6906	0.000948551	0.0314896	19	4	Up-regulated
Sus_scrofa___ENSSSCG00000010058	1.47385	2.59118	13.5054	0.000954922	0.0316148	19	4	Up-regulated
Sus_scrofa___SLAIN2	0.962302	7.43572	13.4989	0.000956571	0.0316406	19	4	Up-regulated
Sus_scrofa___CKB	3.76881	0.905216	13.4064	0.000971497	0.0319603	19	4	Up-regulated
Sus_scrofa___EXOSC1	1.16459	3.46604	13.4136	0.000986861	0.032349	19	4	Up-regulated
Sus_scrofa___USP25	0.778726	9.21077	13.4033	0.000990388	0.0323773	19	4	Up-regulated
Sus_scrofa___PREX1	2.19503	1.15297	13.4174	0.000991652	0.0323895	19	4	Up-regulated
Sus_scrofa___HIF1A	1.54991	7.19252	13.3818	0.000998179	0.0324651	19	4	Up-regulated
Sus_scrofa___TNKS2	0.506855	6.91262	13.3777	0.000999666	0.0324651	19	4	Up-regulated
Sus_scrofa___NUCB1	1.34265	0.365954	13.4044	0.000999907	0.0324651	19	4	Up-regulated
Sus_scrofa___PRKAR1A	0.936036	6.48074	13.3762	0.0010002	0.0324651	19	4	Up-regulated
Sus_scrofa___CYP2S1	3.05417	-1.90767	12.6715	0.00100122	0.0324691	19	4	Up-regulated
Sus_scrofa___ENSSSCG00000027515	1.82063	-0.118992	13.3736	0.00100672	0.0326188	19	4	Up-regulated
Sus_scrofa___ENSSSCG00000029253	2.79986	-1.26853	12.844	0.00101256	0.0327497	19	4	Up-regulated
Sus_scrofa___PSMB9	4.50481	2.03284	13.3181	0.00101557	0.032809	19	4	Up-regulated
Sus_scrofa___ATP8	3.23932	-0.737338	12.9986	0.0010162	0.032809	19	4	Up-regulated
Sus_scrofa___CTRC	1.72562	2.2394	13.3252	0.0010202	0.0328801	19	4	Up-regulated
Sus_scrofa___PANX1	3.14834	1.0373	13.3227	0.00102322	0.032946	19	4	Up-regulated
Sus_scrofa___KCP	2.74795	1.03983	13.3264	0.0010253	0.032946	19	4	Up-regulated
Sus_scrofa___CNN2	1.11706	2.91165	13.3085	0.00102558	0.032946	19	4	Up-regulated
Sus_scrofa___MTPN	1.5567	7.06497	13.3067	0.00102586	0.032946	19	4	Up-regulated
Sus_scrofa___DHX58	5.3269	2.73049	13.2657	0.00103156	0.0330997	19	4	Up-regulated
Sus_scrofa___CLDN6	2.96048	-0.123836	13.176	0.00104045	0.0332732	19	4	Up-regulated
Sus_scrofa___LPCAT3	0.82725	5.23674	13.2677	0.00104061	0.0332732	19	4	Up-regulated
Sus_scrofa___SAMD4B	0.776483	5.96903	13.2547	0.00104554	0.0333596	19	4	Up-regulated
Sus_scrofa___PIK3CG	2.53549	-0.199376	13.2061	0.00104581	0.0333596	19	4	Up-regulated
Sus_scrofa___ENSSSCG00000039506	2.37829	-1.57377	12.6504	0.00104606	0.0333596	19	4	Up-regulated
Sus_scrofa___CHUK	0.610063	4.68592	13.243	0.00105005	0.0334575	19	4	Up-regulated
Sus_scrofa___ENSSSCG00000008451	1.03482	8.25876	13.2319	0.00105429	0.0335137	19	4	Up-regulated
Sus_scrofa___ACOXL	2.51802	2.85741	13.2208	0.00105938	0.0336372	19	4	Up-regulated
Sus_scrofa___EIF2AK2	4.15086	8.14195	13.2159	0.00106051	0.0336436	19	4	Up-regulated
Sus_scrofa___ENSSSCG00000001398	5.60002	1.19336	12.8136	0.00107286	0.0338724	19	4	Up-regulated
Sus_scrofa___SHKBP1	2.15413	-0.179084	13.1781	0.00107325	0.0338724	19	4	Up-regulated
Sus_scrofa___WT1	5.04479	-1.97347	12.8429	0.00107409	0.0338724	19	4	Up-regulated
Sus_scrofa___TMEM135	1.19085	8.88161	13.1689	0.00107891	0.0339432	19	4	Up-regulated
Sus_scrofa___AMOT	2.38771	-0.820118	12.9758	0.0010829	0.0339696	19	4	Up-regulated
Sus_scrofa___GLI1	2.58979	-2.16077	12.2792	0.00108624	0.034016	19	4	Up-regulated
Sus_scrofa___KLHL29	2.68375	3.1938	13.1055	0.00110484	0.0343329	19	4	Up-regulated
Sus_scrofa___FYCO1	0.965544	7.70497	13.092	0.00110978	0.0344091	19	4	Up-regulated
Sus_scrofa___ENSSSCG00000010190	1.6904	9.26582	13.0863	0.00111207	0.0344108	19	4	Up-regulated
Sus_scrofa___PTP4A2	0.832915	8.20589	13.0828	0.00111351	0.0344264	19	4	Up-regulated
Sus_scrofa___MX1	8.31265	6.02651	13.0733	0.00111519	0.034449	19	4	Up-regulated
Sus_scrofa___ENSSSCG00000009348	1.03215	5.91305	13.0732	0.00111747	0.0344903	19	4	Up-regulated
Sus_scrofa___ENSSSCG00000015645	1.08204	6.02732	13.0596	0.00112307	0.0346336	19	4	Up-regulated
Sus_scrofa___RLF	0.607911	7.70753	13.0267	0.00113672	0.0348482	19	4	Up-regulated
Sus_scrofa___ADORA3	1.84696	-0.436138	12.9875	0.00114646	0.0349998	19	4	Up-regulated
Sus_scrofa___ZNF462	0.830376	8.50744	12.9993	0.00114822	0.0350241	19	4	Up-regulated
Sus_scrofa___PTBP3	0.915827	5.69499	12.992	0.00115133	0.035059	19	4	Up-regulated
Sus_scrofa___NFKBIB	0.96543	2.72508	12.9673	0.00116239	0.0352944	19	4	Up-regulated
Sus_scrofa___NOX5	2.05027	-1.50576	12.5004	0.00116316	0.0352944	19	4	Up-regulated
Sus_scrofa___CNGA1	2.15987	0.35011	12.9853	0.00116386	0.0352944	19	4	Up-regulated
Sus_scrofa___ENSSSCG00000034572	1.09317	1.84042	12.9551	0.00116911	0.0353764	19	4	Up-regulated
Sus_scrofa___BICD1	1.27721	5.61846	12.9496	0.00116948	0.0353764	19	4	Up-regulated
Sus_scrofa___VPS37B	0.965616	6.05031	12.9348	0.00117584	0.0354807	19	4	Up-regulated
Sus_scrofa___NEDD4	2.53612	2.40685	12.9139	0.00118665	0.0357054	19	4	Up-regulated
Sus_scrofa___NDFIP2	0.631675	6.20135	12.9087	0.00118721	0.0357054	19	4	Up-regulated
Sus_scrofa___ENSSSCG00000004246	1.10848	2.01099	12.9042	0.00119082	0.0357843	19	4	Up-regulated
Sus_scrofa___KCNN3	0.968656	2.76076	12.8469	0.00121515	0.0364554	19	4	Up-regulated
Sus_scrofa___STAR	0.683477	4.01703	12.8365	0.00121939	0.0365526	19	4	Up-regulated
Sus_scrofa___DOCK8	1.5543	1.07609	12.8399	0.00122433	0.0366705	19	4	Up-regulated
Sus_scrofa___DEK	0.772075	5.97323	12.8211	0.00122631	0.0366996	19	4	Up-regulated
Sus_scrofa___MAP7D2	1.7699	1.32012	12.828	0.0012284	0.0367028	19	4	Up-regulated
Sus_scrofa___ADAM32	1.23552	1.39568	12.8253	0.00122848	0.0367028	19	4	Up-regulated
Sus_scrofa___PHLDA2	3.01509	2.38204	12.8202	0.00122943	0.0367028	19	4	Up-regulated
Sus_scrofa___NFKBIE	2.21121	-0.692958	12.707	0.00123283	0.0367265	19	4	Up-regulated
Sus_scrofa___SEPTIN11	1.44743	5.50822	12.7997	0.00123604	0.0367794	19	4	Up-regulated
Sus_scrofa___FCER1G	1.57939	-0.13745	12.8116	0.00123962	0.0368558	19	4	Up-regulated
Sus_scrofa___SMNDC1	0.754218	4.50323	12.7823	0.00124407	0.0369581	19	4	Up-regulated
Sus_scrofa___BTG1	1.20075	5.60656	12.7774	0.00124631	0.0369645	19	4	Up-regulated
Sus_scrofa___F2	2.48823	2.20322	12.7795	0.00124759	0.0369724	19	4	Up-regulated
Sus_scrofa___RNF11	0.898046	6.74375	12.7702	0.00124963	0.0370026	19	4	Up-regulated
Sus_scrofa___NUP42	0.788972	4.34728	12.7547	0.00125687	0.0371869	19	4	Up-regulated
Sus_scrofa___IFI35	4.25587	-0.320951	12.3533	0.00126481	0.0373435	19	4	Up-regulated
Sus_scrofa___FBXO39	2.25791	6.76852	12.7367	0.00126524	0.0373435	19	4	Up-regulated
Sus_scrofa___RIPK2	0.569963	6.19426	12.7227	0.00127181	0.037507	19	4	Up-regulated
Sus_scrofa___STYK1	2.34403	-1.4229	12.2501	0.00127931	0.0376369	19	4	Up-regulated
Sus_scrofa___ENSSSCG00000045136	2.44186	-1.53767	12.1559	0.00128578	0.0377968	19	4	Up-regulated
Sus_scrofa___MAGI2	1.37836	5.22683	12.6673	0.00129825	0.0381326	19	4	Up-regulated
Sus_scrofa___ENSSSCG00000025485	1.88697	-0.556114	12.6242	0.00130186	0.038193	19	4	Up-regulated
Sus_scrofa___ARL5B	1.05752	4.36692	12.6588	0.0013024	0.038193	19	4	Up-regulated
Sus_scrofa___TLNRD1	2.79606	-0.391516	12.5316	0.00131255	0.0384288	19	4	Up-regulated
Sus_scrofa___VWC2	2.19778	3.3992	12.5815	0.00134067	0.0390437	19	4	Up-regulated
Sus_scrofa___KDR	3.59462	-1.52039	12.1355	0.00134091	0.0390437	19	4	Up-regulated
Sus_scrofa___ENSSSCG00000037566	3.01474	-1.11047	12.1783	0.00134105	0.0390437	19	4	Up-regulated
Sus_scrofa___RHBDF2	1.64644	1.84162	12.5732	0.00134712	0.0391889	19	4	Up-regulated
Sus_scrofa___IGF1R	0.846332	11.4812	12.5254	0.00136867	0.0396576	19	4	Up-regulated
Sus_scrofa___GPX1	3.59681	1.07246	12.5	0.00137535	0.0397879	19	4	Up-regulated
Sus_scrofa___SLC7A5	3.78221	-1.3481	12.1105	0.00138147	0.0398656	19	4	Up-regulated
Sus_scrofa___LRRC36	1.11222	0.579282	12.5185	0.00138262	0.0398656	19	4	Up-regulated
Sus_scrofa___PARP14	6.54745	3.97722	12.4757	0.0013835	0.0398656	19	4	Up-regulated
Sus_scrofa___TRAFD1	1.31006	5.14507	12.4874	0.00138823	0.0399388	19	4	Up-regulated
Sus_scrofa___PDZD8	0.543043	6.98801	12.4696	0.0013975	0.0400798	19	4	Up-regulated
Sus_scrofa___CMPK2	10.437	4.20538	12.4971	0.00139753	0.0400798	19	4	Up-regulated
Sus_scrofa___PNPLA8	0.983735	6.74871	12.4596	0.00140275	0.0401072	19	4	Up-regulated
Sus_scrofa___MAPRE1	1.0152	5.2627	12.4535	0.00140592	0.0401072	19	4	Up-regulated
Sus_scrofa___UPP1	4.31564	2.49536	12.4537	0.00140955	0.0401426	19	4	Up-regulated
Sus_scrofa___IFI44	6.62157	6.25429	12.4334	0.00141806	0.0402728	19	4	Up-regulated
Sus_scrofa___RNF103	1.18443	6.62153	12.4265	0.0014202	0.0402728	19	4	Up-regulated
Sus_scrofa___PDE4B	1.05872	9.15167	12.4225	0.0014223	0.0402728	19	4	Up-regulated
Sus_scrofa___CACHD1	1.20033	3.59485	12.422	0.00142279	0.0402728	19	4	Up-regulated
Sus_scrofa___NFIL3	2.61109	5.04237	12.3756	0.00144756	0.0408226	19	4	Up-regulated
Sus_scrofa___AIMP2	0.726978	3.91051	12.3226	0.00147669	0.0414235	19	4	Up-regulated
Sus_scrofa___PLSCR1	2.30774	4.38733	12.3214	0.00147734	0.0414235	19	4	Up-regulated
Sus_scrofa___ENSSSCG00000042726	4.86449	1.52843	12.1868	0.0014914	0.0416492	19	4	Up-regulated
Sus_scrofa___RHEB	1.36531	7.595	12.2957	0.00149157	0.0416492	19	4	Up-regulated
Sus_scrofa___DEGS1	0.733873	3.80576	12.2943	0.00149247	0.0416492	19	4	Up-regulated
Sus_scrofa___LRRC49	1.19949	4.2104	12.2901	0.00149477	0.0416559	19	4	Up-regulated
Sus_scrofa___ENSSSCG00000006350	2.74161	2.6913	12.285	0.00149921	0.0416898	19	4	Up-regulated
Sus_scrofa___AOPEP	0.748573	11.1828	12.2694	0.00150637	0.0416904	19	4	Up-regulated
Sus_scrofa___ENSSSCG00000034555	3.37595	-2.11334	11.6792	0.00150745	0.0416904	19	4	Up-regulated
Sus_scrofa___NDRG1	3.89834	0.162633	12.0667	0.00151934	0.0419556	19	4	Up-regulated
Sus_scrofa___ARFGAP3	0.944725	6.8772	12.2439	0.00152087	0.0419662	19	4	Up-regulated
Sus_scrofa___CCND3	2.04084	4.31304	12.2364	0.00152527	0.0420064	19	4	Up-regulated
Sus_scrofa___ENSSSCG00000008057	2.13566	-1.40892	11.8514	0.00152809	0.0420064	19	4	Up-regulated
Sus_scrofa___IGSF8	1.29355	1.35122	12.2299	0.00153405	0.0421202	19	4	Up-regulated
Sus_scrofa___CPLX4	1.484	0.799866	12.2368	0.00153505	0.0421202	19	4	Up-regulated
Sus_scrofa___LGALS3BP	6.93873	2.26304	11.8398	0.00154536	0.0423215	19	4	Up-regulated
Sus_scrofa___ATP8B4	1.59799	1.14332	12.2103	0.00154752	0.0423488	19	4	Up-regulated
Sus_scrofa___JAKMIP3	3.44775	3.88567	12.1932	0.00155082	0.0423915	19	4	Up-regulated
Sus_scrofa___FMNL2	2.14248	3.04883	12.1912	0.00155193	0.0423915	19	4	Up-regulated
Sus_scrofa___CLTC	0.650744	7.25594	12.1853	0.0015548	0.0424143	19	4	Up-regulated
Sus_scrofa___IFI44L	4.34718	6.38604	12.1816	0.00155703	0.0424181	19	4	Up-regulated
Sus_scrofa___INTS5	2.47797	-1.35005	11.7812	0.00155869	0.0424181	19	4	Up-regulated
Sus_scrofa___RBM18	0.740196	4.63132	12.1776	0.00155936	0.0424181	19	4	Up-regulated
Sus_scrofa___IFIT1	6.77842	5.95785	12.1775	0.00156228	0.0424372	19	4	Up-regulated
Sus_scrofa___LRRC42	0.858105	4.14739	12.1611	0.00156916	0.0425576	19	4	Up-regulated
Sus_scrofa___HSPA14	0.677427	4.47739	12.1477	0.00157705	0.0427243	19	4	Up-regulated
Sus_scrofa___DDC	2.24143	1.13067	12.1617	0.00157765	0.0427243	19	4	Up-regulated
Sus_scrofa___MORC3	1.10895	5.77948	12.1237	0.00159135	0.0429677	19	4	Up-regulated
Sus_scrofa___SPACA3	2.59654	1.07505	12.1222	0.00160202	0.0431276	19	4	Up-regulated
Sus_scrofa___UCK2	1.65923	7.77762	12.1041	0.00160319	0.0431276	19	4	Up-regulated
Sus_scrofa___CYP51A1	0.902762	2.86104	12.0956	0.00160887	0.0432484	19	4	Up-regulated
Sus_scrofa___GRK5	0.844779	11.6257	12.0871	0.00161346	0.0432711	19	4	Up-regulated
Sus_scrofa___ENSSSCG00000040586	1.9762	1.45332	12.0963	0.00161376	0.0432711	19	4	Up-regulated
Sus_scrofa___RNF216	0.602131	7.24049	12.0808	0.00161736	0.043297	19	4	Up-regulated
Sus_scrofa___GATA6	0.655249	9.1168	12.0786	0.00161867	0.043297	19	4	Up-regulated
Sus_scrofa___ERBIN	0.780964	8.65626	12.0731	0.00162207	0.0433157	19	4	Up-regulated
Sus_scrofa___CASS4	1.09599	0.916001	12.0842	0.00162393	0.0433338	19	4	Up-regulated
Sus_scrofa___ENSSSCG00000032953	1.24775	1.98585	12.0631	0.00163033	0.0433973	19	4	Up-regulated
Sus_scrofa___PLEKHS1	1.96999	1.94226	12.0613	0.00163226	0.0433973	19	4	Up-regulated
Papio_anubis_ELOA	5.50676	1.05404	11.7296	0.00164088	0.0435311	19	4	Up-regulated
Sus_scrofa___EGLN3	1.05627	6.54706	12.0353	0.0016454	0.0436193	19	4	Up-regulated
Sus_scrofa___ENSSSCG00000050627	0.84717	3.39075	12.0245	0.0016524	0.0437224	19	4	Up-regulated
Sus_scrofa___PEX7	0.76871	5.66312	11.976	0.00168278	0.0442561	19	4	Up-regulated
Sus_scrofa___ENSSSCG00000032959	2.76398	0.451191	11.9717	0.00168876	0.0443174	19	4	Up-regulated
Sus_scrofa___GDF10	3.24348	-0.674604	11.6736	0.00169729	0.0444452	19	4	Up-regulated
Sus_scrofa___MYBL1	1.72427	2.77264	11.9509	0.0016996	0.0444739	19	4	Up-regulated
Sus_scrofa___KIAA0319	0.971178	3.34387	11.9426	0.00170451	0.0445704	19	4	Up-regulated
Sus_scrofa___LRRC6	1.61	2.38417	11.9123	0.00172528	0.0450488	19	4	Up-regulated
Sus_scrofa___ZNF484	1.48645	2.40218	11.9075	0.00172834	0.0450965	19	4	Up-regulated
Sus_scrofa___FOSL1	3.99547	-1.23945	11.579	0.00173688	0.0452545	19	4	Up-regulated
Sus_scrofa___ENSSSCG00000000703	1.93806	-0.740785	11.8173	0.00173884	0.0452731	19	4	Up-regulated
Sus_scrofa___YEATS4	0.920365	3.25248	11.8804	0.00174532	0.0453112	19	4	Up-regulated
Sus_scrofa___ARHGAP6	1.90748	1.98196	11.8818	0.00174684	0.0453112	19	4	Up-regulated
Papio_anubis_GATA6	1.00807	-0.19925	11.8574	0.00177187	0.0456619	19	4	Up-regulated
Sus_scrofa___MARCHF2	1.39859	-0.623805	11.8218	0.00177203	0.0456619	19	4	Up-regulated
Sus_scrofa___ENSSSCG00000023324	0.691241	7.24894	11.8393	0.00177245	0.0456619	19	4	Up-regulated
Sus_scrofa___PAPLN	1.60964	-0.526148	11.8259	0.00177256	0.0456619	19	4	Up-regulated
Sus_scrofa___RNF145	0.633175	5.98906	11.8323	0.00177718	0.0457162	19	4	Up-regulated
Sus_scrofa___ZNF503	4.89318	-2.09007	11.4728	0.0017814	0.0457925	19	4	Up-regulated
Sus_scrofa___DOCK2	1.49694	-0.0259084	11.8415	0.00178512	0.0458558	19	4	Up-regulated
Sus_scrofa___FLT1	2.65023	3.48742	11.8175	0.00178771	0.0458752	19	4	Up-regulated
Sus_scrofa___XCR1	3.17176	-2.2497	11.1707	0.00179832	0.0460652	19	4	Up-regulated
Sus_scrofa___TMEM51	3.31871	0.721549	11.7686	0.00181212	0.0462742	19	4	Up-regulated
Sus_scrofa___ENSSSCG00000042730	2.70758	-0.885701	11.5744	0.00181244	0.0462742	19	4	Up-regulated
Sus_scrofa___TAGLN	5.43182	-1.71952	11.6849	0.00181775	0.0463025	19	4	Up-regulated
Sus_scrofa___ENSSSCG00000047274	1.54307	1.44641	11.7699	0.0018255	0.0463824	19	4	Up-regulated
Sus_scrofa___MEGF9	1.01855	3.82042	11.7584	0.0018281	0.0463824	19	4	Up-regulated
Sus_scrofa___RPL28	2.64951	3.01447	11.7555	0.00183099	0.0463824	19	4	Up-regulated
Sus_scrofa___ENC1	3.00579	2.04711	11.7194	0.00186088	0.0469094	19	4	Up-regulated
Sus_scrofa___LRRC38	1.78197	-1.43226	11.3964	0.00186611	0.0469799	19	4	Up-regulated
Sus_scrofa___CYTH3	0.880994	7.1253	11.7041	0.00186626	0.0469799	19	4	Up-regulated
Sus_scrofa___ENSSSCG00000051054	1.40275	3.76882	11.7002	0.00186917	0.0470208	19	4	Up-regulated
Sus_scrofa___LRATD2	3.83994	-1.86047	11.3228	0.00189139	0.0475141	19	4	Up-regulated
Sus_scrofa___HERC4	1.18364	9.35668	11.6655	0.00189395	0.0475457	19	4	Up-regulated
Sus_scrofa___ENSSSCG00000005247	1.67395	4.66901	11.6524	0.00190356	0.047754	19	4	Up-regulated
Sus_scrofa___ENSSSCG00000002281	0.662119	5.40474	11.6502	0.00190512	0.0477603	19	4	Up-regulated
Sus_scrofa___FOXS1	9.07292	4.64613	11.3459	0.00191024	0.0478557	19	4	Up-regulated
Sus_scrofa___ENSSSCG00000007944	2.18864	0.573137	11.6505	0.00191902	0.0479402	19	4	Up-regulated
Sus_scrofa___RPS3A	1.77027	3.40602	11.6204	0.00192727	0.0480741	19	4	Up-regulated
Sus_scrofa___PRSS23	2.41217	1.73301	11.6224	0.00193112	0.0481143	19	4	Up-regulated
Sus_scrofa___ZBTB22	1.14297	2.7224	11.593	0.00194809	0.0485039	19	4	Up-regulated
Sus_scrofa___HERC6	5.98512	6.6795	11.5856	0.00195319	0.0485715	19	4	Up-regulated
Sus_scrofa___OR6N2	4.13673	-2.46832	10.9183	0.00195346	0.0485715	19	4	Up-regulated
Sus_scrofa___STC1	4.05217	-2.51522	10.8779	0.0019611	0.0486949	19	4	Up-regulated
Sus_scrofa___OAF	4.04339	-2.53228	10.8712	0.00196426	0.048733	19	4	Up-regulated
Sus_scrofa___ARAP2	3.13975	1.36392	11.5695	0.00197312	0.0488933	19	4	Up-regulated
Sus_scrofa___DDX60	6.15525	5.98427	11.5519	0.00197968	0.0489588	19	4	Up-regulated
Sus_scrofa___MX2	10.2414	5.80848	11.2563	0.00198065	0.0489588	19	4	Up-regulated
Sus_scrofa___TSPAN13	2.29151	-0.551192	11.4803	0.00198512	0.0490242	19	4	Up-regulated
Sus_scrofa___PTGS2	4.57643	-2.26583	11.0489	0.00199426	0.0491832	19	4	Up-regulated
Sus_scrofa___SLC25A33	1.04014	4.92501	11.517	0.00200494	0.0493465	19	4	Up-regulated
Sus_scrofa___SKAP1	1.34744	2.55048	11.5119	0.00200989	0.0494016	19	4	Up-regulated
Sus_scrofa___FGD3	1.40769	0.591392	11.5228	0.00201474	0.0494873	19	4	Up-regulated
Sus_scrofa___GALP	-5.64816	0.62062	316.703	9.63312e-21	3.51137e-16	19	4	Down-regulated
Sus_scrofa___ANKRD66	-3.76255	-0.632159	125.665	9.34846e-14	8.51901e-10	19	4	Down-regulated
Sus_scrofa___ENSSSCG00000013504	-2.99286	0.20541	124.396	3.45562e-12	2.51922e-08	19	4	Down-regulated
Sus_scrofa___ENSSSCG00000036306	-4.05459	2.66185	115.172	1.30941e-11	7.95486e-08	19	4	Down-regulated
Papio_anubis_GRAMD1C	-3.89005	-2.07666	73.1358	2.00141e-11	9.39237e-08	19	4	Down-regulated
Sus_scrofa___ENSSSCG00000016365	-2.84205	0.189164	107.603	2.06137e-11	9.39237e-08	19	4	Down-regulated
Sus_scrofa___RNF135	-2.93015	3.78521	103.71	4.15088e-11	1.4809e-07	19	4	Down-regulated
Sus_scrofa___LRRC3B	-3.49467	2.08874	104.001	4.27959e-11	1.4809e-07	19	4	Down-regulated
Sus_scrofa___ENSSSCG00000037928	-3.97518	-1.65507	67.7709	4.46899e-11	1.4809e-07	19	4	Down-regulated
Sus_scrofa___ENSSSCG00000009595	-2.96434	2.0997	102.479	4.99471e-11	1.51719e-07	19	4	Down-regulated
Sus_scrofa___SLC38A5	-3.18785	0.840644	98.4236	7.4108e-11	2.07793e-07	19	4	Down-regulated
Sus_scrofa___NTM	-3.22278	5.28716	93.6795	1.31067e-10	3.30494e-07	19	4	Down-regulated
Sus_scrofa___FNDC1	-3.83704	4.44519	93.4047	1.36002e-10	3.30494e-07	19	4	Down-regulated
Sus_scrofa___PPEF2	-3.11344	0.551431	91.4999	1.54499e-10	3.51977e-07	19	4	Down-regulated
Sus_scrofa___ENSSSCG00000050454	-3.96674	-2.01947	59.8779	3.64977e-10	7.82574e-07	19	4	Down-regulated
Sus_scrofa___ALDH5A1	-2.30312	4.46098	83.0986	4.93897e-10	1.00017e-06	19	4	Down-regulated
Sus_scrofa___ENSSSCG00000047248	-3.08975	-1.67447	56.2361	1.24987e-09	2.39785e-06	19	4	Down-regulated
Sus_scrofa___ENSSSCG00000031964	-4.06258	-0.758724	56.7554	2.21466e-09	3.84412e-06	19	4	Down-regulated
Sus_scrofa___ENSSSCG00000041209	-3.12578	-0.816392	60.8539	2.4857e-09	4.11847e-06	19	4	Down-regulated
Papio_anubis_ETV1	-3.74223	-2.01001	50.5852	2.94729e-09	4.67095e-06	19	4	Down-regulated
Sus_scrofa___HNMT	-3.41489	2.18085	69.266	3.58556e-09	5.44571e-06	19	4	Down-regulated
Sus_scrofa___ENSSSCG00000043379	-4.4538	-1.96574	52.9309	3.99735e-09	5.82829e-06	19	4	Down-regulated
Sus_scrofa___CFAP97D1	-2.12835	2.53621	67.4832	4.55422e-09	6.3611e-06	19	4	Down-regulated
Sus_scrofa___NREP	-3.19513	6.59107	67.1764	4.7118e-09	6.3611e-06	19	4	Down-regulated
Sus_scrofa___NAAA	-2.96488	3.95206	66.1749	5.51475e-09	7.17922e-06	19	4	Down-regulated
Papio_anubis_PALM2AKAP2	-4.62934	-2.18029	59.2229	7.0141e-09	8.39622e-06	19	4	Down-regulated
Sus_scrofa___HPS4	-1.49425	3.85285	60.9329	1.26996e-08	1.38676e-05	19	4	Down-regulated
Sus_scrofa___SCN4A	-1.99787	0.487072	60.9814	1.29351e-08	1.38676e-05	19	4	Down-regulated
Sus_scrofa___ENSSSCG00000004016	-2.44593	-0.810768	55.1474	1.39188e-08	1.40932e-05	19	4	Down-regulated
Sus_scrofa___ENSSSCG00000014314	-2.71166	0.827574	60.1624	1.4807e-08	1.45873e-05	19	4	Down-regulated
Sus_scrofa___PHACTR3	-2.96848	1.77959	59.725	1.61457e-08	1.54876e-05	19	4	Down-regulated
Sus_scrofa___DNAJC5G	-2.32984	-0.0031227	57.0721	2.13761e-08	1.9979e-05	19	4	Down-regulated
Sus_scrofa___RAPGEF3	-2.50227	0.113281	56.5205	2.4207e-08	2.20593e-05	19	4	Down-regulated
Sus_scrofa___RAPGEF5	-1.38286	8.09437	56.2754	2.78294e-08	2.47417e-05	19	4	Down-regulated
Sus_scrofa___ENSSSCG00000034739	-2.90408	1.82611	56.2619	2.89473e-08	2.51228e-05	19	4	Down-regulated
Sus_scrofa___CATSPERG	-1.31366	4.04401	55.6328	3.11452e-08	2.62603e-05	19	4	Down-regulated
Papio_anubis_EPB41L5	-3.12628	-2.42753	40.1067	6.85906e-08	5.4352e-05	19	4	Down-regulated
Sus_scrofa___FAM216B	-3.21775	-0.574103	45.9088	7.39388e-08	5.73435e-05	19	4	Down-regulated
Papio_anubis_IFT81	-3.13269	-2.18694	37.1526	1.2181e-07	9.06139e-05	19	4	Down-regulated
Sus_scrofa___EPB41L5	-1.37213	7.39237	47.6732	1.34275e-07	9.59695e-05	19	4	Down-regulated
Sus_scrofa___ENSSSCG00000034220	-3.26787	0.302986	46.327	1.46006e-07	0.000102347	19	4	Down-regulated
Sus_scrofa___ENSSSCG00000004017	-2.92754	-1.77251	37.0644	1.80111e-07	0.000121578	19	4	Down-regulated
Sus_scrofa___ENSSSCG00000043787	-6.371	-1.23763	46.2078	1.88457e-07	0.000122686	19	4	Down-regulated
Sus_scrofa___CENPS	-2.41862	-0.317088	44.6183	1.91842e-07	0.000122686	19	4	Down-regulated
Sus_scrofa___CBR3	-3.91084	0.65145	44.7965	1.94345e-07	0.000122686	19	4	Down-regulated
Papio_anubis_TFDP2	-2.80478	-1.4098	38.6204	1.95215e-07	0.000122686	19	4	Down-regulated
Sus_scrofa___ENSSSCG00000051613	-3.07512	-2.3984	35.9281	2.08067e-07	0.000128547	19	4	Down-regulated
Sus_scrofa___CXorf65	-3.45441	-2.56861	39.8409	2.21048e-07	0.00013429	19	4	Down-regulated
Sus_scrofa___SPNS3	-1.67634	1.0445	45.2006	2.25483e-07	0.000134739	19	4	Down-regulated
Sus_scrofa___CAVIN4	-1.35635	2.25564	44.9093	2.3331e-07	0.000137167	19	4	Down-regulated
Sus_scrofa___AUTS2	-1.97613	8.8322	44.313	2.60982e-07	0.000145585	19	4	Down-regulated
Sus_scrofa___DGAT1	-1.57621	2.79206	44.284	2.63603e-07	0.000145585	19	4	Down-regulated
Sus_scrofa___ENSSSCG00000048506	-3.6377	-2.50519	39.1017	2.69298e-07	0.00014651	19	4	Down-regulated
Sus_scrofa___GRAMD1C	-1.64396	6.37668	43.6763	2.97062e-07	0.000156931	19	4	Down-regulated
Sus_scrofa___SOX13	-2.45728	1.59248	43.6885	3.04701e-07	0.000158667	19	4	Down-regulated
Sus_scrofa___RIPOR3	-1.8035	2.48302	43.4909	3.10786e-07	0.000159556	19	4	Down-regulated
Sus_scrofa___ASB9	-2.97113	0.574289	42.5549	3.6443e-07	0.000177696	19	4	Down-regulated
Papio_anubis_CEP170	-3.35284	-1.88128	33.8295	3.65619e-07	0.000177696	19	4	Down-regulated
Sus_scrofa___SMIM5	-1.73654	4.52161	42.5995	3.70886e-07	0.000177884	19	4	Down-regulated
Sus_scrofa___SLF1	-1.36251	5.19947	42.2113	4.01965e-07	0.000189064	19	4	Down-regulated
Sus_scrofa___ADAMTS7	-1.75788	6.76437	42.18	4.0457e-07	0.000189064	19	4	Down-regulated
Papio_anubis_CCT5	-5.75315	-2.35262	83.9291	4.17541e-07	0.000190247	19	4	Down-regulated
Sus_scrofa___NTHL1	-1.57454	1.98897	41.9927	4.2589e-07	0.000191656	19	4	Down-regulated
Papio_anubis_TRUB1	-2.32071	-1.27217	37.1034	4.4416e-07	0.000192739	19	4	Down-regulated
Sus_scrofa___CTNNB1	-0.933946	6.73855	41.4231	4.74197e-07	0.000203353	19	4	Down-regulated
Papio_anubis_DNAH8	-3.31443	-2.4958	34.543	4.88483e-07	0.000207043	19	4	Down-regulated
Sus_scrofa___ENSSSCG00000042693	-2.53768	0.945875	39.8181	6.85905e-07	0.000277516	19	4	Down-regulated
Sus_scrofa___ENSSSCG00000037083	-2.45761	-0.971467	36.4868	6.88066e-07	0.000277516	19	4	Down-regulated
Sus_scrofa___ENSSSCG00000037344	-2.12604	0.197083	39.5826	6.9282e-07	0.000277516	19	4	Down-regulated
Papio_anubis_KIF13A	-3.05807	-0.570516	36.629	7.42067e-07	0.000293531	19	4	Down-regulated
Sus_scrofa___ENSSSCG00000039089	-1.60616	3.52809	39.2968	7.48907e-07	0.000293531	19	4	Down-regulated
Sus_scrofa___ENSSSCG00000041142	-2.12303	1.3835	39.3116	7.64962e-07	0.0002962	19	4	Down-regulated
Papio_anubis_STK38	-3.0361	-2.19496	31.2636	7.71967e-07	0.0002962	19	4	Down-regulated
Papio_anubis_PPP1R9A	-3.22695	-1.5255	32.4043	7.93961e-07	0.000299057	19	4	Down-regulated
Sus_scrofa___AIFM3	-3.01275	-2.01029	31.3486	7.95823e-07	0.000299057	19	4	Down-regulated
Sus_scrofa___ENSSSCG00000046159	-2.68768	-0.176239	37.58	8.75321e-07	0.000319063	19	4	Down-regulated
Sus_scrofa___HMCN1	-3.75968	6.27779	38.1819	9.55638e-07	0.000338194	19	4	Down-regulated
Sus_scrofa___CENPE	-2.25268	1.78071	37.5627	1.11724e-06	0.000391581	19	4	Down-regulated
Papio_anubis_ENSPANG00000022056	-3.01762	-0.355741	35.5071	1.19081e-06	0.000413394	19	4	Down-regulated
Sus_scrofa___TMEM231	-1.83639	2.60026	37.0666	1.23247e-06	0.000423818	19	4	Down-regulated
Sus_scrofa___ZNF235	-1.49252	3.2912	36.7569	1.31672e-06	0.000442001	19	4	Down-regulated
Sus_scrofa___PHKA2	-1.35457	4.42286	36.735	1.32172e-06	0.000442001	19	4	Down-regulated
Sus_scrofa___RINT1	-0.833395	5.31338	36.1837	1.49806e-06	0.000496418	19	4	Down-regulated
Sus_scrofa___DECR1	-0.924739	6.4884	36.1344	1.51497e-06	0.000497496	19	4	Down-regulated
Sus_scrofa___ENSSSCG00000012895	-1.90962	4.41141	35.9601	1.57732e-06	0.000508804	19	4	Down-regulated
Sus_scrofa___CUL7	-1.35251	1.71788	35.7515	1.67557e-06	0.000535756	19	4	Down-regulated
Sus_scrofa___DPT	-3.4164	3.23822	35.4939	1.76761e-06	0.000557877	19	4	Down-regulated
Sus_scrofa___RHOT1	-0.876288	8.54231	34.8354	2.04555e-06	0.000626574	19	4	Down-regulated
Sus_scrofa___ENSSSCG00000014575	-1.31025	6.15868	34.7624	2.0808e-06	0.000630783	19	4	Down-regulated
Sus_scrofa___IGSF1	-1.73405	1.08749	34.8147	2.10557e-06	0.000630783	19	4	Down-regulated
Sus_scrofa___IGFBP5	-3.107	-0.0484216	33.7428	2.1112e-06	0.000630783	19	4	Down-regulated
Sus_scrofa___TPRA1	-1.15184	3.10277	34.4998	2.2163e-06	0.000651502	19	4	Down-regulated
Papio_anubis_FRA10AC1	-3.36554	-1.82397	28.1976	2.2869e-06	0.000657539	19	4	Down-regulated
Sus_scrofa___TSPAN11	-1.9251	2.1739	34.2071	2.39268e-06	0.000677261	19	4	Down-regulated
Papio_anubis_CFAP36	-2.17742	-1.72004	29.5982	2.39773e-06	0.000677261	19	4	Down-regulated
Papio_anubis_PUS10	-2.93487	-1.85958	28.3596	2.4154e-06	0.000677261	19	4	Down-regulated
Sus_scrofa___TRIP13	-1.2103	3.64551	33.9433	2.52518e-06	0.000701781	19	4	Down-regulated
Sus_scrofa___PYROXD2	-1.8244	2.93455	33.9255	2.54136e-06	0.000701781	19	4	Down-regulated
Sus_scrofa___PARP1	-1.62377	4.45019	33.7997	2.61161e-06	0.000710416	19	4	Down-regulated
Sus_scrofa___GPRL15	-1.6183	3.10633	33.5661	2.76554e-06	0.000735814	19	4	Down-regulated
Sus_scrofa___SLC2A4RG	-1.98414	2.28339	33.5145	2.81687e-06	0.000744041	19	4	Down-regulated
Sus_scrofa___TRUB1	-1.11088	5.59448	33.4091	2.86573e-06	0.000751501	19	4	Down-regulated
Sus_scrofa___UMODL1	-2.62489	0.325433	33.1675	2.94684e-06	0.000767252	19	4	Down-regulated
Papio_anubis_NPHP3	-3.36842	-2.67466	31.3839	3.00832e-06	0.000777703	19	4	Down-regulated
Papio_anubis_NFAT5	-2.81936	-1.12798	29.8683	3.0415e-06	0.000780744	19	4	Down-regulated
Sus_scrofa___ASNS	-1.31662	6.33783	32.8008	3.31696e-06	0.000833839	19	4	Down-regulated
Sus_scrofa___ENSSSCG00000002430	-1.38944	6.65917	32.7509	3.35722e-06	0.000838179	19	4	Down-regulated
Papio_anubis_POLB	-2.84428	-2.48843	27.1458	3.42032e-06	0.000845941	19	4	Down-regulated
Sus_scrofa___ROBO2	-2.80779	6.34498	32.6567	3.43473e-06	0.000845941	19	4	Down-regulated
Sus_scrofa___ENSSSCG00000041087	-2.99318	-1.1056	29.1605	3.50327e-06	0.000854931	19	4	Down-regulated
Sus_scrofa___CLK3	-1.09417	3.44653	32.561	3.51814e-06	0.000854931	19	4	Down-regulated
Sus_scrofa___TYW3	-1.01504	4.02698	32.4928	3.57528e-06	0.000857384	19	4	Down-regulated
Sus_scrofa___COX6B2	-2.09541	-1.21862	29.8322	3.60617e-06	0.000859141	19	4	Down-regulated
Sus_scrofa___AKAP8	-1.03717	5.55916	32.3458	3.70412e-06	0.000873058	19	4	Down-regulated
Sus_scrofa___LIPM	-3.56863	1.08442	32.1817	3.83166e-06	0.000889603	19	4	Down-regulated
Papio_anubis_ATG5	-3.35112	-2.6111	29.1203	3.94579e-06	0.000908582	19	4	Down-regulated
Sus_scrofa___SYT17	-2.22117	2.41812	32.0705	3.99076e-06	0.00090917	19	4	Down-regulated
Sus_scrofa___ENSSSCG00000044658	-2.4085	-0.595611	30.6804	4.05994e-06	0.000919186	19	4	Down-regulated
Sus_scrofa___TBATA	-2.69365	-0.888941	29.315	4.33378e-06	0.000956515	19	4	Down-regulated
Sus_scrofa___GRB7	-3.15976	-2.05749	26.136	4.34231e-06	0.000956515	19	4	Down-regulated
Sus_scrofa___RIN2	-1.78637	7.16636	31.6616	4.37975e-06	0.000956515	19	4	Down-regulated
Sus_scrofa___KBTBD13	-2.9267	-1.97635	26.1895	4.66852e-06	0.00100496	19	4	Down-regulated
Sus_scrofa___PCMTD2	-1.04328	5.95356	31.4027	4.669e-06	0.00100496	19	4	Down-regulated
Sus_scrofa___KY	-1.95895	3.42421	31.3927	4.68691e-06	0.00100496	19	4	Down-regulated
Sus_scrofa___IGDCC4	-1.29456	2.30985	31.3108	4.79976e-06	0.00102313	19	4	Down-regulated
Papio_anubis_CDK14	-2.6793	-1.24139	27.9538	4.98984e-06	0.00105747	19	4	Down-regulated
Sus_scrofa___ENSSSCG00000040106	-1.52507	0.733646	30.3472	6.20937e-06	0.00126446	19	4	Down-regulated
Sus_scrofa___TSEN54	-1.37269	2.84983	30.0195	6.61655e-06	0.00133438	19	4	Down-regulated
Sus_scrofa___ARMCX6	-1.2649	2.12442	30.029	6.62593e-06	0.00133438	19	4	Down-regulated
Sus_scrofa___ZNF575	-1.59538	0.715108	30.0302	6.72476e-06	0.00134684	19	4	Down-regulated
Sus_scrofa___ENSSSCG00000031810	-0.941033	4.43845	29.5171	7.50509e-06	0.00147079	19	4	Down-regulated
Sus_scrofa___DYNC2I1	-1.00467	3.87316	29.4949	7.5496e-06	0.00147161	19	4	Down-regulated
Sus_scrofa___DNASE1	-0.945836	4.86057	29.2139	8.11168e-06	0.00153999	19	4	Down-regulated
Sus_scrofa___TSC22D4	-1.29457	4.13785	29.1845	8.17508e-06	0.00154399	19	4	Down-regulated
Sus_scrofa___CEP85	-1.12469	7.02876	29.0532	8.45371e-06	0.00158024	19	4	Down-regulated
Sus_scrofa___OXSM	-1.5285	2.37025	28.9643	8.68911e-06	0.00160321	19	4	Down-regulated
Papio_anubis_ATF7	-2.70098	-1.90958	24.6383	8.80179e-06	0.00161223	19	4	Down-regulated
Sus_scrofa___ENSSSCG00000035617	-1.85128	6.24935	28.8258	8.96588e-06	0.00162595	19	4	Down-regulated
Papio_anubis_USP3	-2.53351	-0.914515	27.0208	9.18057e-06	0.00164979	19	4	Down-regulated
Sus_scrofa___TMEM170A	-1.03481	3.76068	28.7218	9.21519e-06	0.00164979	19	4	Down-regulated
Sus_scrofa___B3GNT8	-2.1507	2.24796	28.7307	9.26173e-06	0.00164979	19	4	Down-regulated
Sus_scrofa___STAMBPL1	-1.98209	3.56599	28.6787	9.32365e-06	0.00164979	19	4	Down-regulated
Sus_scrofa___DPP4	-1.20155	8.61836	28.4344	9.9264e-06	0.00174796	19	4	Down-regulated
Papio_anubis_TRO	-1.71668	1.05394	28.4688	1.00242e-05	0.0017487	19	4	Down-regulated
Sus_scrofa___ETV1	-2.47767	3.02736	28.3603	1.01531e-05	0.00176234	19	4	Down-regulated
Sus_scrofa___AIG1	-1.21691	6.1732	28.2934	1.0299e-05	0.0017708	19	4	Down-regulated
Sus_scrofa___SLC1A6	-2.06044	-1.43264	25.6606	1.06891e-05	0.00182671	19	4	Down-regulated
Sus_scrofa___BPHL	-1.18316	3.85514	28.1404	1.07244e-05	0.00182671	19	4	Down-regulated
Sus_scrofa___PROK2	-2.07169	-1.86346	24.4976	1.11148e-05	0.00187567	19	4	Down-regulated
Sus_scrofa___ANO8	-1.31037	3.42796	27.8021	1.17277e-05	0.00196038	19	4	Down-regulated
Sus_scrofa___ENSSSCG00000047956	-1.74458	-1.41995	25.639	1.1843e-05	0.00196038	19	4	Down-regulated
Sus_scrofa___PFKFB2	-1.19169	4.34465	27.7493	1.18856e-05	0.00196038	19	4	Down-regulated
Papio_anubis_RHOT1	-2.32396	-0.167797	27.3244	1.22896e-05	0.00199097	19	4	Down-regulated
Papio_anubis_CELF2	-2.49949	-1.75107	23.9842	1.27522e-05	0.00204664	19	4	Down-regulated
Sus_scrofa___DYRK2	-1.22913	4.22651	27.4692	1.28017e-05	0.00204664	19	4	Down-regulated
Sus_scrofa___HYPK	-1.35474	3.90014	27.4487	1.28735e-05	0.00204913	19	4	Down-regulated
Sus_scrofa___ENSSSCG00000012879	-0.974984	4.29092	27.4204	1.29683e-05	0.00205525	19	4	Down-regulated
Sus_scrofa___MANBA	-1.62855	4.6666	27.3977	1.30462e-05	0.00205651	19	4	Down-regulated
Sus_scrofa___MCFD2	-1.2749	4.9864	27.3851	1.30891e-05	0.00205651	19	4	Down-regulated
Sus_scrofa___KCND3	-2.18625	5.45695	27.3444	1.32313e-05	0.00206206	19	4	Down-regulated
Sus_scrofa___KCNIP2	-2.37252	5.32721	27.2372	1.36154e-05	0.0021119	19	4	Down-regulated
Papio_anubis_RCOR3	-2.50403	-1.13089	25.0953	1.41905e-05	0.00219176	19	4	Down-regulated
Sus_scrofa___TGFBR3	-2.0392	5.55501	26.5189	1.65125e-05	0.0025184	19	4	Down-regulated
Sus_scrofa___RETSAT	-1.935	4.38568	26.4344	1.68988e-05	0.00256658	19	4	Down-regulated
Sus_scrofa___ENSSSCG00000003076	-0.905963	3.04315	26.4137	1.70078e-05	0.00257241	19	4	Down-regulated
Sus_scrofa___ASB5	-1.43267	4.18109	26.2615	1.77109e-05	0.0026567	19	4	Down-regulated
Sus_scrofa___MAOB	-1.75877	5.11431	26.146	1.82725e-05	0.0027115	19	4	Down-regulated
Sus_scrofa___CDHR1	-2.81088	2.57837	26.1607	1.83294e-05	0.0027115	19	4	Down-regulated
Sus_scrofa___PLIN5	-2.16715	0.30305	26.0941	1.84878e-05	0.00271734	19	4	Down-regulated
Sus_scrofa___OLFML2A	-1.86324	2.08964	25.9187	1.95758e-05	0.00285423	19	4	Down-regulated
Sus_scrofa___ENSSSCG00000044144	-2.79728	-2.61568	22.4957	1.96855e-05	0.00285879	19	4	Down-regulated
Sus_scrofa___ZNF436	-1.21545	2.37975	25.8614	1.98139e-05	0.00286389	19	4	Down-regulated
Sus_scrofa___TRAF3IP3	-1.65631	4.46349	25.8337	1.99031e-05	0.00286389	19	4	Down-regulated
Papio_anubis_DYNC2H1	-2.43158	-2.46967	21.8923	1.99563e-05	0.00286389	19	4	Down-regulated
Sus_scrofa___TTC16	-1.9558	0.553529	25.8141	2.02813e-05	0.00289182	19	4	Down-regulated
Sus_scrofa___MAP2K6	-2.19946	2.60996	25.7405	2.05019e-05	0.00290783	19	4	Down-regulated
Papio_anubis_ZNF207	-2.60059	0.614551	25.6233	2.11385e-05	0.00298651	19	4	Down-regulated
Sus_scrofa___MINDY1	-1.2727	5.24843	25.4915	2.18634e-05	0.00305342	19	4	Down-regulated
Sus_scrofa___RXRG	-1.82255	5.73822	25.364	2.26468e-05	0.00314495	19	4	Down-regulated
Sus_scrofa___SLC5A7	-1.70938	-1.30424	23.6919	2.30508e-05	0.00317066	19	4	Down-regulated
Papio_anubis_NREP	-3.5574	-2.77199	27.0675	2.31891e-05	0.00317769	19	4	Down-regulated
Sus_scrofa___ENSSSCG00000034623	-1.99828	-0.403332	24.9284	2.33428e-05	0.00318678	19	4	Down-regulated
Papio_anubis_CCDC191	-1.60436	0.370016	25.2623	2.35587e-05	0.0031933	19	4	Down-regulated
Sus_scrofa___TMEM106A	-1.68193	-0.221902	25.0573	2.38696e-05	0.00319657	19	4	Down-regulated
Sus_scrofa___CERS4	-1.17238	5.93749	25.094	2.44073e-05	0.00322901	19	4	Down-regulated
Sus_scrofa___ENSSSCG00000050756	-2.38888	-1.93333	21.8905	2.44404e-05	0.00322901	19	4	Down-regulated
Sus_scrofa___ENSSSCG00000051591	-2.57126	4.91571	25.0885	2.44495e-05	0.00322901	19	4	Down-regulated
Sus_scrofa___PTPRU	-1.02308	4.80594	25.0473	2.47281e-05	0.00325403	19	4	Down-regulated
Sus_scrofa___SLC46A1	-1.56244	1.21499	24.9762	2.55819e-05	0.00335426	19	4	Down-regulated
Sus_scrofa___IVD	-1.13133	5.22644	24.8837	2.58817e-05	0.00338141	19	4	Down-regulated
Papio_anubis_LIMCH1	-2.23192	-2.26301	21.2265	2.65603e-05	0.00345768	19	4	Down-regulated
Sus_scrofa___MGLL	-1.03925	6.79224	24.7661	2.67451e-05	0.00346935	19	4	Down-regulated
Sus_scrofa___ECM2	-1.55033	6.48938	24.6676	2.74938e-05	0.00354126	19	4	Down-regulated
Sus_scrofa___ADAMTSL1	-1.87596	7.78562	24.5709	2.82502e-05	0.00361973	19	4	Down-regulated
Papio_anubis_TMEM168	-2.81872	-2.21086	20.9642	2.83016e-05	0.00361973	19	4	Down-regulated
Sus_scrofa___HAUS8	-1.1608	3.59256	24.5255	2.8627e-05	0.00364713	19	4	Down-regulated
Papio_anubis_MFF	-2.73799	-2.09604	21.0245	2.88807e-05	0.00365532	19	4	Down-regulated
Sus_scrofa___ENSSSCG00000050172	-1.41332	1.38462	24.4458	2.9608e-05	0.0037344	19	4	Down-regulated
Sus_scrofa___TMEM131L	-1.11	7.14436	24.3237	3.02875e-05	0.00379385	19	4	Down-regulated
Sus_scrofa___PTPRS	-1.26577	3.77294	24.246	3.0972e-05	0.00385311	19	4	Down-regulated
Papio_anubis_AUTS2	-2.75662	-2.21976	20.6748	3.15828e-05	0.00391573	19	4	Down-regulated
Sus_scrofa___ENSSSCG00000051665	-1.5492	0.209089	24.1284	3.21795e-05	0.00391875	19	4	Down-regulated
Sus_scrofa___ENSSSCG00000040911	-2.33699	-1.97455	21.0275	3.27888e-05	0.00395653	19	4	Down-regulated
Sus_scrofa___HHATL	-1.58251	-0.288108	23.8918	3.28888e-05	0.00395653	19	4	Down-regulated
Papio_anubis_TTC14	-2.27087	-0.96807	22.8296	3.34938e-05	0.00401606	19	4	Down-regulated
Sus_scrofa___ENSSSCG00000000028	-1.90456	-0.455795	23.4427	3.52074e-05	0.00414399	19	4	Down-regulated
Papio_anubis_TMEM131	-2.73916	-1.72966	20.9858	3.52119e-05	0.00414399	19	4	Down-regulated
Papio_anubis_FNBP1L	-2.96365	-2.71949	21.9796	3.52428e-05	0.00414399	19	4	Down-regulated
Sus_scrofa___NT5DC2	-1.33132	1.8177	23.727	3.61264e-05	0.00422065	19	4	Down-regulated
Sus_scrofa___NANOG	-1.70363	-1.28604	22.3199	3.66263e-05	0.00425332	19	4	Down-regulated
Sus_scrofa___NKAIN1	-1.54966	2.45314	23.6651	3.66394e-05	0.00425332	19	4	Down-regulated
Sus_scrofa___DLX1	-1.99636	-1.13183	22.3013	3.72877e-05	0.00431484	19	4	Down-regulated
Papio_anubis_IREB2	-2.60387	-1.78901	20.7669	3.77505e-05	0.00435457	19	4	Down-regulated
Sus_scrofa___XRCC3	-1.10629	1.79272	23.3537	4.01905e-05	0.00452155	19	4	Down-regulated
Papio_anubis_CEP290	-2.36036	-0.665283	22.512	4.03315e-05	0.00452346	19	4	Down-regulated
Sus_scrofa___KMT5C	-1.13132	1.66295	23.2284	4.17143e-05	0.00463576	19	4	Down-regulated
Papio_anubis_SFSWAP	-2.69199	-2.67788	20.581	4.23516e-05	0.00466392	19	4	Down-regulated
Sus_scrofa___ESRP1	-1.22122	0.79147	23.1791	4.26436e-05	0.00468194	19	4	Down-regulated
Sus_scrofa___FGFBP3	-1.75162	-1.5019	21.4179	4.30303e-05	0.0046961	19	4	Down-regulated
Sus_scrofa___KLHDC3	-1.24777	4.74581	22.97	4.46294e-05	0.00484162	19	4	Down-regulated
Papio_anubis_IARS2	-3.78495	-2.69104	24.4162	4.55228e-05	0.00490932	19	4	Down-regulated
Sus_scrofa___RNF207	-1.6268	6.57665	22.8713	4.59239e-05	0.00492345	19	4	Down-regulated
Sus_scrofa___PATZ1	-1.05799	2.19998	22.6953	4.85033e-05	0.00513951	19	4	Down-regulated
Sus_scrofa___ENSSSCG00000037808	-1.04981	3.08989	22.6465	4.90779e-05	0.00518533	19	4	Down-regulated
Sus_scrofa___GAPT	-1.59282	-1.4143	21.2157	4.92511e-05	0.00518859	19	4	Down-regulated
Sus_scrofa___ANKRD39	-1.2954	8.10456	22.6056	4.96242e-05	0.00521283	19	4	Down-regulated
Sus_scrofa___ENSSSCG00000026564	-1.47711	3.66677	22.5213	5.08871e-05	0.00529967	19	4	Down-regulated
Sus_scrofa___FRA10AC1	-1.17097	5.4591	22.4853	5.14039e-05	0.00531107	19	4	Down-regulated
Sus_scrofa___TRIM65	-1.36621	2.6949	22.4896	5.14336e-05	0.00531107	19	4	Down-regulated
Sus_scrofa___SLC19A1	-1.36437	2.59684	22.3411	5.37427e-05	0.00551824	19	4	Down-regulated
Sus_scrofa___PEBP4	-1.39005	2.97738	22.2696	5.48346e-05	0.00561454	19	4	Down-regulated
Sus_scrofa___TPGS1	-1.25678	3.28634	22.1141	5.73786e-05	0.00583648	19	4	Down-regulated
Sus_scrofa___ABCG5	-1.64738	1.15953	22.13	5.78126e-05	0.00584611	19	4	Down-regulated
Papio_anubis_FCHSD2	-2.5178	-1.41011	20.1654	5.78982e-05	0.00584611	19	4	Down-regulated
Sus_scrofa___PLCL1	-1.01736	8.4702	22.0525	5.83924e-05	0.00587972	19	4	Down-regulated
Papio_anubis_AIFM1	-2.30491	-0.960761	20.9183	5.94934e-05	0.00595768	19	4	Down-regulated
Papio_anubis_ENSPANG00000030252	-4.53061	-2.68228	28.5489	6.05232e-05	0.00604419	19	4	Down-regulated
Sus_scrofa___F13B	-1.50535	-0.656833	21.5928	6.07804e-05	0.0060533	19	4	Down-regulated
Sus_scrofa___ENSSSCG00000048197	-3.53573	2.52108	21.8901	6.18833e-05	0.00614634	19	4	Down-regulated
Sus_scrofa___SEMA6C	-1.29166	2.44917	21.8361	6.24209e-05	0.00618289	19	4	Down-regulated
Papio_anubis_TMEFF1	-1.90225	-1.13603	20.6047	6.61712e-05	0.00644922	19	4	Down-regulated
Papio_anubis_NPTN	-3.32573	-2.76005	21.603	6.70803e-05	0.00648517	19	4	Down-regulated
Sus_scrofa___ENSSSCG00000047774	-1.90073	-0.488233	21.2731	6.73022e-05	0.00648517	19	4	Down-regulated
Sus_scrofa___ENSSSCG00000015747	-2.25462	9.94034	21.5745	6.73127e-05	0.00648517	19	4	Down-regulated
Sus_scrofa___P4HA3	-2.06913	-0.772412	20.9733	6.73498e-05	0.00648517	19	4	Down-regulated
Papio_anubis_CTDSP2	-2.22993	-1.85496	19.3055	6.74296e-05	0.00648517	19	4	Down-regulated
Sus_scrofa___MMP14	-2.2728	2.03557	21.5254	6.88045e-05	0.00658266	19	4	Down-regulated
Sus_scrofa___DIP2A	-0.950209	6.47478	21.429	7.03093e-05	0.0066915	19	4	Down-regulated
Sus_scrofa___CYB5R1	-2.15397	-2.16643	18.6769	7.31549e-05	0.00691626	19	4	Down-regulated
Papio_anubis_TP53BP1	-2.59949	-2.49981	18.5366	7.33391e-05	0.00691626	19	4	Down-regulated
Sus_scrofa___RAE1	-0.785463	4.76274	21.2738	7.36707e-05	0.00691626	19	4	Down-regulated
Sus_scrofa___SMIM17	-1.53592	2.32837	21.2696	7.39991e-05	0.00691626	19	4	Down-regulated
Sus_scrofa___VWC2L	-3.67445	5.28744	21.2319	7.46193e-05	0.00695639	19	4	Down-regulated
Sus_scrofa___MRPL41	-1.39151	2.84747	21.1583	7.63785e-05	0.00706617	19	4	Down-regulated
Sus_scrofa___PTOV1	-1.06791	3.87089	21.127	7.70171e-05	0.00710722	19	4	Down-regulated
Papio_anubis_PIGG	-1.80203	-0.838703	20.5519	7.74786e-05	0.00713175	19	4	Down-regulated
Sus_scrofa___ENSSSCG00000014041	-1.11245	1.28679	21.0476	7.9623e-05	0.00727403	19	4	Down-regulated
Sus_scrofa___ENSSSCG00000042294	-1.52234	-0.456368	20.8268	7.98449e-05	0.00727606	19	4	Down-regulated
Papio_anubis_FBXO32	-1.58143	-0.339463	20.8597	8.03438e-05	0.0072851	19	4	Down-regulated
Sus_scrofa___PGRMC1	-0.949901	5.20615	20.9511	8.12064e-05	0.00732686	19	4	Down-regulated
Papio_anubis_SMC3	-1.91668	-1.73059	19.0907	8.24666e-05	0.00738922	19	4	Down-regulated
Sus_scrofa___WRAP73	-1.25965	3.74946	20.8997	8.25056e-05	0.00738922	19	4	Down-regulated
Sus_scrofa___COG1	-0.785206	5.08755	20.8614	8.3445e-05	0.00742152	19	4	Down-regulated
Sus_scrofa___EPHX2	-1.36491	5.4671	20.8558	8.35876e-05	0.00742152	19	4	Down-regulated
Sus_scrofa___HTR4	-1.09705	5.19217	20.7866	8.53638e-05	0.00752126	19	4	Down-regulated
Papio_anubis_KBTBD3	-1.90014	-1.49263	19.2568	8.56307e-05	0.00752126	19	4	Down-regulated
Sus_scrofa___DPH7	-0.94793	3.62234	20.7146	8.72836e-05	0.00764801	19	4	Down-regulated
Sus_scrofa___FBXO36	-0.851718	4.01201	20.6692	8.84865e-05	0.00769369	19	4	Down-regulated
Sus_scrofa___CCNJL	-1.5387	0.697686	20.6894	8.90747e-05	0.00769369	19	4	Down-regulated
Papio_anubis_PBX3	-3.20356	-2.79494	20.6513	8.90823e-05	0.00769369	19	4	Down-regulated
Sus_scrofa___TDP1	-1.07566	3.42157	20.6294	8.95908e-05	0.00769369	19	4	Down-regulated
Sus_scrofa___AFAP1L1	-1.20693	5.00689	20.6238	8.97044e-05	0.00769369	19	4	Down-regulated
Sus_scrofa___ASB11	-1.83825	4.92965	20.6093	9.01067e-05	0.00770595	19	4	Down-regulated
Sus_scrofa___MAVS	-0.822024	7.17661	20.6031	9.02702e-05	0.00770595	19	4	Down-regulated
Sus_scrofa___IFT122	-0.915145	4.74539	20.5906	9.06214e-05	0.00771786	19	4	Down-regulated
Sus_scrofa___MCF2L	-1.25258	4.58367	20.5311	9.22867e-05	0.007795	19	4	Down-regulated
Sus_scrofa___SLC40A1	-1.54556	4.94817	20.5174	9.26715e-05	0.007795	19	4	Down-regulated
Sus_scrofa___IFTAP	-0.876997	5.49799	20.5083	9.29232e-05	0.007795	19	4	Down-regulated
Sus_scrofa___MACROD1	-1.43635	5.98872	20.5048	9.30242e-05	0.007795	19	4	Down-regulated
Sus_scrofa___TMEM150A	-1.13497	1.71965	20.4613	9.48176e-05	0.00788075	19	4	Down-regulated
Sus_scrofa___SPTAN1	-1.0894	7.69798	20.4251	9.53208e-05	0.00788075	19	4	Down-regulated
Sus_scrofa___ENSSSCG00000023127	-1.50537	-0.775368	20.0195	9.61387e-05	0.00788075	19	4	Down-regulated
Sus_scrofa___FAM117A	-1.00575	3.99773	20.3976	9.61483e-05	0.00788075	19	4	Down-regulated
Papio_anubis_SLC9A8	-2.39527	-1.8937	18.1944	9.61544e-05	0.00788075	19	4	Down-regulated
Sus_scrofa___ENSSSCG00000039004	-0.6812	5.14381	20.3905	9.63408e-05	0.00788075	19	4	Down-regulated
Papio_anubis_PCCA	-2.13453	-0.848335	19.7116	9.64257e-05	0.00788075	19	4	Down-regulated
Sus_scrofa___ENSSSCG00000032157	-1.4496	-0.40635	20.2536	9.67945e-05	0.00789319	19	4	Down-regulated
Sus_scrofa___HDC	-2.50279	-1.90546	17.9824	0.000100826	0.00811303	19	4	Down-regulated
Sus_scrofa___CCDC88C	-1.29288	3.32204	20.1737	0.000103039	0.00827288	19	4	Down-regulated
Sus_scrofa___HDHD3	-1.15925	1.4384	20.181	0.000103568	0.00829705	19	4	Down-regulated
Papio_anubis_RAB8B	-3.04644	-2.82992	20.1013	0.000104185	0.00832821	19	4	Down-regulated
Sus_scrofa___ENKD1	-1.13557	1.82279	20.1053	0.000105703	0.00843102	19	4	Down-regulated
Sus_scrofa___ENSSSCG00000004008	-1.03174	4.1165	20.0804	0.000106003	0.00843646	19	4	Down-regulated
Papio_anubis_MLLT10	-2.512	-1.01095	19.0202	0.000107448	0.00851434	19	4	Down-regulated
Sus_scrofa___SYNC	-1.07355	4.06461	20.0283	0.000107725	0.00851777	19	4	Down-regulated
Sus_scrofa___RERGL	-5.0995	-2.62349	29.3242	0.00010845	0.00852584	19	4	Down-regulated
Sus_scrofa___STK36	-0.844073	3.55291	19.916	0.000111554	0.00872586	19	4	Down-regulated
Sus_scrofa___NDST3	-1.51113	4.75664	19.882	0.000112707	0.00877354	19	4	Down-regulated
Sus_scrofa___ENSSSCG00000038906	-2.62824	-2.35029	17.3556	0.000112982	0.00877354	19	4	Down-regulated
Papio_anubis_KIF13B	-2.07267	-0.865853	19.2534	0.000113168	0.00877354	19	4	Down-regulated
Sus_scrofa___STX1A	-1.52901	1.63292	19.8828	0.000113486	0.00877354	19	4	Down-regulated
Sus_scrofa___ENSSSCG00000027916	-0.758278	4.46558	19.7963	0.000115745	0.0089026	19	4	Down-regulated
Sus_scrofa___SPATA20	-1.11116	1.92896	19.8023	0.000116012	0.0089026	19	4	Down-regulated
Sus_scrofa___ENSSSCG00000048187	-3.34096	-2.68324	18.9762	0.000118627	0.00903351	19	4	Down-regulated
Sus_scrofa___PWWP2B	-1.14769	1.89547	19.7251	0.000118863	0.00903351	19	4	Down-regulated
Papio_anubis_PHF20	-2.05177	0.364797	19.6911	0.000120005	0.00907533	19	4	Down-regulated
Sus_scrofa___CYC1	-1.01534	5.1546	19.664	0.000120605	0.00908911	19	4	Down-regulated
Sus_scrofa___VPS36	-0.799122	5.88686	19.6618	0.000120686	0.00908911	19	4	Down-regulated
Sus_scrofa___RPS6KA5	-1.02655	7.66615	19.6254	0.000122063	0.00917385	19	4	Down-regulated
Sus_scrofa___DIPK1A	-0.770314	7.40611	19.6037	0.000122892	0.00921718	19	4	Down-regulated
Sus_scrofa___CPXM2	-1.51823	3.25419	19.5565	0.000124809	0.00932255	19	4	Down-regulated
Sus_scrofa___MYCBPAP	-1.48922	1.17621	19.5412	0.000126635	0.00943965	19	4	Down-regulated
Sus_scrofa___NELFCD	-0.790229	4.37767	19.4682	0.000128223	0.00951906	19	4	Down-regulated
Sus_scrofa___SLC13A1	-1.13108	3.18985	19.4558	0.000128793	0.00954192	19	4	Down-regulated
Papio_anubis_FAF1	-2.70619	-2.35632	17.0026	0.000130145	0.00962251	19	4	Down-regulated
Sus_scrofa___ENSSSCG00000032029	-1.15954	6.51402	19.352	0.000132969	0.00981142	19	4	Down-regulated
Sus_scrofa___GLRX5	-1.10062	5.04767	19.3119	0.000134654	0.00991573	19	4	Down-regulated
Sus_scrofa___KCNH2	-1.13792	5.49783	19.2699	0.000136443	0.0100272	19	4	Down-regulated
Sus_scrofa___HACD3	-0.857514	6.31482	19.2476	0.000137403	0.0100708	19	4	Down-regulated
Sus_scrofa___C1orf216	-1.93789	-2.13769	17.1483	0.00013807	0.0100857	19	4	Down-regulated
Sus_scrofa___FGF13	-1.11042	9.69148	19.218	0.000138687	0.0100945	19	4	Down-regulated
Sus_scrofa___TEX9	-0.983315	5.99985	19.2044	0.000139283	0.0101136	19	4	Down-regulated
Sus_scrofa___POMT1	-0.88141	4.52561	19.1908	0.000139894	0.0101378	19	4	Down-regulated
Sus_scrofa___TSR2	-0.952575	4.47597	19.1701	0.000140812	0.010184	19	4	Down-regulated
Papio_anubis_EMC2	-1.63087	1.69047	19.1767	0.000141467	0.0102111	19	4	Down-regulated
Papio_anubis_DDX6	-2.55987	-1.29533	17.7353	0.000145591	0.0104467	19	4	Down-regulated
Papio_anubis_TNIK	-2.4322	-1.24814	17.8163	0.000146678	0.0104835	19	4	Down-regulated
Papio_anubis_PARD3	-2.70619	-2.60279	16.9792	0.000149665	0.0106477	19	4	Down-regulated
Sus_scrofa___PCSK6	-0.954961	7.09405	18.9605	0.000150439	0.0106686	19	4	Down-regulated
Sus_scrofa___CPT1B	-1.18887	7.21526	18.947	0.000151084	0.0106935	19	4	Down-regulated
Sus_scrofa___CLEC19A	-1.82447	1.02706	18.9591	0.000152247	0.0107213	19	4	Down-regulated
Papio_anubis_CUX1	-2.28345	-1.72451	17.1816	0.000154064	0.0108204	19	4	Down-regulated
Sus_scrofa___SIRT5	-0.753695	4.99373	18.8263	0.000156986	0.0109623	19	4	Down-regulated
Sus_scrofa___CYP46A1	-1.57431	0.855687	18.8516	0.00015754	0.0109799	19	4	Down-regulated
Papio_anubis_PAXBP1	-1.48771	0.369306	18.7895	0.000160239	0.0111255	19	4	Down-regulated
Sus_scrofa___NSMF	-1.10673	3.83094	18.7523	0.000160755	0.0111317	19	4	Down-regulated
Sus_scrofa___PPFIA3	-1.40061	4.56687	18.7483	0.000160939	0.0111317	19	4	Down-regulated
Sus_scrofa___IQSEC1	-1.05527	4.94854	18.7113	0.000162835	0.011178	19	4	Down-regulated
Sus_scrofa___ACSS2	-0.785836	7.48691	18.6858	0.000164158	0.0112265	19	4	Down-regulated
Papio_anubis_RB1	-2.25409	-1.77434	16.9733	0.000165985	0.0112912	19	4	Down-regulated
Sus_scrofa___KDM2B	-0.982004	5.15152	18.6503	0.000166033	0.0112912	19	4	Down-regulated
Papio_anubis_RAPGEF2	-2.39318	-2.08627	16.5224	0.000169296	0.0114278	19	4	Down-regulated
Papio_anubis_COMMD3	-2.15255	-2.54229	16.3374	0.000169922	0.0114489	19	4	Down-regulated
Sus_scrofa___R3HDML	-1.97045	-2.01286	16.7097	0.000171618	0.0115418	19	4	Down-regulated
Sus_scrofa___SORD	-1.3459	1.47339	18.5223	0.000174204	0.0116512	19	4	Down-regulated
Sus_scrofa___CDH1	-1.53518	1.71125	18.5083	0.000174806	0.01167	19	4	Down-regulated
Sus_scrofa___SMTN	-1.56844	5.57426	18.4828	0.000175166	0.0116727	19	4	Down-regulated
Sus_scrofa___OSBPL3	-0.792469	8.16125	18.4387	0.000177649	0.011787	19	4	Down-regulated
Sus_scrofa___SPTA1	-1.44099	0.336967	18.4542	0.000178209	0.011787	19	4	Down-regulated
Papio_anubis_KPNA5	-2.69118	-2.77988	17.24	0.000178653	0.011787	19	4	Down-regulated
Sus_scrofa___NT5C1A	-1.07038	4.15564	18.3416	0.000183303	0.0120251	19	4	Down-regulated
Sus_scrofa___CCDC102A	-1.19362	0.711479	18.3719	0.000183558	0.0120251	19	4	Down-regulated
Sus_scrofa___ENSSSCG00000047214	-1.80854	-1.9941	16.6101	0.000183942	0.0120251	19	4	Down-regulated
Sus_scrofa___AZIN2	-1.63376	2.59202	18.3331	0.000184134	0.0120251	19	4	Down-regulated
Sus_scrofa___CARNS1	-1.24605	2.55979	18.3197	0.000184874	0.0120251	19	4	Down-regulated
Sus_scrofa___ATG16L2	-1.18125	2.79962	18.3125	0.000185202	0.0120251	19	4	Down-regulated
Sus_scrofa___FAM186B	-1.29436	1.39378	18.3197	0.00018598	0.0120251	19	4	Down-regulated
Papio_anubis_ZCCHC10	-2.20811	-1.58585	16.9033	0.000186062	0.0120251	19	4	Down-regulated
Sus_scrofa___MST1R	-1.59546	-1.12475	17.6153	0.000187048	0.0120674	19	4	Down-regulated
Papio_anubis_ENSPANG00000032917	-2.38576	-2.20563	16.1852	0.000188514	0.0121061	19	4	Down-regulated
Sus_scrofa___TYK2	-0.650401	5.28862	18.2493	0.000188804	0.0121061	19	4	Down-regulated
Papio_anubis_CNTLN	-2.58526	-2.65178	16.3841	0.000188977	0.0121061	19	4	Down-regulated
Sus_scrofa___NEXMIF	-1.49038	-0.341657	18.1292	0.000190797	0.0121799	19	4	Down-regulated
Sus_scrofa___ESRRG	-0.892479	9.42615	18.1526	0.000194775	0.0123689	19	4	Down-regulated
Sus_scrofa___PAQR9	-1.06675	4.40478	18.1427	0.00019542	0.0123883	19	4	Down-regulated
Sus_scrofa___SRGAP1	-1.6552	3.69076	18.036	0.00020233	0.0127157	19	4	Down-regulated
Sus_scrofa___MKS1	-1.21545	1.74609	18.034	0.000203395	0.0127376	19	4	Down-regulated
Sus_scrofa___CES5A	-1.56704	1.47833	17.9348	0.00021056	0.0130325	19	4	Down-regulated
Sus_scrofa___ENSSSCG00000027349	-0.852975	4.25171	17.8999	0.000211402	0.013056	19	4	Down-regulated
Sus_scrofa___ACSF2	-0.999051	5.12553	17.8903	0.000212042	0.013056	19	4	Down-regulated
Papio_anubis_DPH6	-2.39279	-2.50968	15.769	0.000216146	0.0132639	19	4	Down-regulated
Papio_anubis_MKLN1	-2.61181	-2.31649	15.7187	0.000218768	0.0132873	19	4	Down-regulated
Papio_anubis_ENSPANG00000016737	-2.31456	-2.39292	15.709	0.000219444	0.0132873	19	4	Down-regulated
Sus_scrofa___ANXA9	-1.13959	3.51684	17.7791	0.000219924	0.0132943	19	4	Down-regulated
Sus_scrofa___DBF4B	-1.08627	2.29266	17.7769	0.000220486	0.0133062	19	4	Down-regulated
Sus_scrofa___HBB	-1.58247	2.77332	17.7575	0.000221698	0.0133535	19	4	Down-regulated
Sus_scrofa___COA4	-1.49403	0.0285978	17.7246	0.000223656	0.0133867	19	4	Down-regulated
Papio_anubis_ENSPANG00000035889	-2.38881	-2.19023	15.7056	0.000226119	0.0135119	19	4	Down-regulated
Sus_scrofa___TRPT1	-0.972843	2.04639	17.6792	0.000227795	0.0135898	19	4	Down-regulated
Papio_anubis_GPHN	-2.28581	-2.05698	15.8367	0.000228891	0.0136321	19	4	Down-regulated
Sus_scrofa___MYOM3	-1.0405	7.23824	17.6453	0.000229649	0.0136335	19	4	Down-regulated
Sus_scrofa___CYP2U1	-1.00832	3.33824	17.6135	0.000232151	0.0137517	19	4	Down-regulated
Sus_scrofa___CEL	-2.13049	0.0742615	17.5241	0.000234955	0.0138238	19	4	Down-regulated
Sus_scrofa___HVCN1	-1.1054	4.06413	17.5375	0.000237931	0.0138829	19	4	Down-regulated
Sus_scrofa___INSC	-1.5355	3.84589	17.534	0.000238231	0.0138829	19	4	Down-regulated
Papio_anubis_IQCB1	-3.47762	-2.89253	19.6347	0.000239825	0.0139201	19	4	Down-regulated
Sus_scrofa___ENSSSCG00000048980	-2.94355	-2.77841	16.8387	0.000242264	0.0140214	19	4	Down-regulated
Papio_anubis_APC	-2.50079	-2.54468	15.5404	0.000244875	0.0140869	19	4	Down-regulated
Sus_scrofa___DPAGT1	-0.876344	2.24484	17.4422	0.000245958	0.0140965	19	4	Down-regulated
Sus_scrofa___CRTAP	-1.12648	3.14394	17.4046	0.000248635	0.0142276	19	4	Down-regulated
Papio_anubis_CNTNAP2	-3.93034	-2.84966	21.3267	0.000251462	0.0143107	19	4	Down-regulated
Sus_scrofa___ENSSSCG00000034561	-1.16974	2.22679	17.371	0.000251855	0.0143107	19	4	Down-regulated
Sus_scrofa___FLACC1	-1.15021	0.302205	17.387	0.000252101	0.0143107	19	4	Down-regulated
Sus_scrofa___LECT2	-1.50486	-0.880763	16.9899	0.000252485	0.0143107	19	4	Down-regulated
Sus_scrofa___GGA2	-0.690768	6.12933	17.3519	0.000252835	0.0143107	19	4	Down-regulated
Sus_scrofa___THBS2	-2.06415	-0.706973	16.9468	0.000255578	0.0143967	19	4	Down-regulated
Papio_anubis_ARFGEF1	-2.16513	-0.472698	17.0637	0.000256329	0.0143967	19	4	Down-regulated
Sus_scrofa___RNPS1	-0.688759	5.7981	17.289	0.00025813	0.0144755	19	4	Down-regulated
Sus_scrofa___PPIF	-0.935021	4.24728	17.277	0.000259174	0.0144936	19	4	Down-regulated
Papio_anubis_SLC38A6	-2.25227	-2.56418	15.3201	0.000259503	0.0144936	19	4	Down-regulated
Sus_scrofa___KIF26A	-1.06271	1.6142	17.2823	0.000260035	0.0144936	19	4	Down-regulated
Papio_anubis_MTF2	-2.09703	-1.33605	16.3079	0.000260042	0.0144936	19	4	Down-regulated
Papio_anubis_MAPKAP1	-1.95858	-1.53548	16.1685	0.000261436	0.014549	19	4	Down-regulated
Sus_scrofa___STOM	-1.0992	4.63344	17.2029	0.000265574	0.0146896	19	4	Down-regulated
Papio_anubis_RASA2	-2.41357	-1.99206	15.4835	0.000267631	0.0147586	19	4	Down-regulated
Sus_scrofa___ENSSSCG00000032319	-1.3098	2.34598	17.1661	0.000269373	0.0148098	19	4	Down-regulated
Sus_scrofa___CRMP1	-1.57501	-0.092718	17.0866	0.000273409	0.014964	19	4	Down-regulated
Sus_scrofa___FAM110B	-0.966446	5.89882	17.0502	0.000279316	0.0152416	19	4	Down-regulated
Sus_scrofa___TEKT5	-1.33529	0.0667067	17.0357	0.000281319	0.015305	19	4	Down-regulated
Papio_anubis_FBXL17	-2.52839	-2.34911	15.08	0.000284265	0.0154422	19	4	Down-regulated
Papio_anubis_ENSPANG00000015635	-2.19092	-2.34149	15.1028	0.00028574	0.0154565	19	4	Down-regulated
Sus_scrofa___TSPAN10	-1.35556	1.25207	16.9737	0.000288734	0.015546	19	4	Down-regulated
Papio_anubis_ANKRD13C	-2.18626	-1.92167	15.3863	0.000290311	0.0156079	19	4	Down-regulated
Papio_anubis_LMBRD1	-2.5199	-2.75252	15.6026	0.000291966	0.0156534	19	4	Down-regulated
Sus_scrofa___NECAP2	-0.896262	3.97641	16.9091	0.000292758	0.0156601	19	4	Down-regulated
Sus_scrofa___ING1	-0.894084	2.3376	16.9114	0.000293001	0.0156601	19	4	Down-regulated
Sus_scrofa___ENSSSCG00000022295	-0.697006	6.20228	16.8956	0.00029402	0.0156768	19	4	Down-regulated
Sus_scrofa___PLEKHM3	-0.943665	8.30765	16.8941	0.000294174	0.0156768	19	4	Down-regulated
Papio_anubis_MTMR3	-2.32442	-2.10944	15.163	0.000295593	0.0157213	19	4	Down-regulated
Sus_scrofa___TARS3	-1.22163	6.14059	16.8751	0.000296037	0.0157213	19	4	Down-regulated
Sus_scrofa___CDH8	-1.451	6.77337	16.8225	0.000301265	0.0158904	19	4	Down-regulated
Sus_scrofa___APBB1	-0.812373	4.43528	16.7975	0.00030381	0.015957	19	4	Down-regulated
Papio_anubis_ATF2	-2.18902	-0.775599	16.3456	0.000306526	0.0160304	19	4	Down-regulated
Sus_scrofa___USP22	-0.651018	4.45846	16.7617	0.000307458	0.0160561	19	4	Down-regulated
Papio_anubis_PHF21A	-2.67068	-2.53016	14.962	0.000311243	0.0161381	19	4	Down-regulated
Papio_anubis_RAB28	-2.6516	-2.6248	15.1148	0.00031263	0.016187	19	4	Down-regulated
Sus_scrofa___CYTH2	-0.67716	4.47764	16.7045	0.000313387	0.0162032	19	4	Down-regulated
Sus_scrofa___ITIH5	-1.82114	1.85669	16.7127	0.000314068	0.0162154	19	4	Down-regulated
Papio_anubis_USP45	-2.24992	-1.71154	15.3476	0.000315076	0.0162274	19	4	Down-regulated
Sus_scrofa___C1orf210	-2.05238	-1.74093	15.3807	0.000315636	0.0162274	19	4	Down-regulated
Papio_anubis_TCEA1	-1.78946	-1.09615	16.0928	0.000318867	0.0162965	19	4	Down-regulated
Sus_scrofa___PPM1L	-1.24666	7.12242	16.6336	0.000320886	0.0162972	19	4	Down-regulated
Papio_anubis_CBLB	-2.26226	-2.12485	14.9283	0.000321163	0.0162972	19	4	Down-regulated
Papio_anubis_NAV2	-2.15737	-2.06339	14.9875	0.00032314	0.0163594	19	4	Down-regulated
Sus_scrofa___COMMD3	-1.00101	5.10929	16.605	0.000323978	0.0163791	19	4	Down-regulated
Sus_scrofa___AKR7A2	-1.15088	-0.554544	16.4909	0.00032475	0.0163942	19	4	Down-regulated
Sus_scrofa___CEP250	-0.77657	5.25294	16.5799	0.000326713	0.016437	19	4	Down-regulated
Sus_scrofa___MSRB2	-0.740069	5.3369	16.5506	0.000329939	0.0165428	19	4	Down-regulated
Sus_scrofa___PGAP2	-0.818985	2.91269	16.5432	0.000330983	0.0165496	19	4	Down-regulated
Sus_scrofa___MMP16	-0.935754	8.05113	16.5219	0.00033312	0.0165914	19	4	Down-regulated
Sus_scrofa___DALRD3	-0.861834	4.60387	16.4295	0.000343658	0.0169693	19	4	Down-regulated
Sus_scrofa___COX7A2L	-0.736866	4.8888	16.4181	0.000344962	0.0169693	19	4	Down-regulated
Sus_scrofa___PDGFC	-0.839288	8.40057	16.4077	0.000346162	0.0169824	19	4	Down-regulated
Sus_scrofa___ENSSSCG00000006286	-2.3972	-2.53884	14.6162	0.000351203	0.0172066	19	4	Down-regulated
Sus_scrofa___PNPLA7	-0.742877	4.0203	16.3573	0.000352134	0.0172189	19	4	Down-regulated
Sus_scrofa___CES1	-1.96118	2.89737	16.3584	0.0003524	0.0172189	19	4	Down-regulated
Papio_anubis_PTPN4	-1.66573	1.41444	16.3456	0.000356063	0.0173514	19	4	Down-regulated
Sus_scrofa___ACAD9	-0.812924	3.60347	16.299	0.000359168	0.0174793	19	4	Down-regulated
Papio_anubis_AFG1L	-2.19595	-2.0615	14.7334	0.000359849	0.0174892	19	4	Down-regulated
Sus_scrofa___ENSSSCG00000047137	-1.7148	-1.96558	14.8918	0.000364511	0.0176686	19	4	Down-regulated
Sus_scrofa___ENSSSCG00000042285	-2.20577	-1.33218	15.2965	0.000365481	0.0176921	19	4	Down-regulated
Sus_scrofa___ABCC9	-1.28365	1.96033	16.2473	0.000366612	0.0177233	19	4	Down-regulated
Sus_scrofa___DVL2	-0.809562	3.22365	16.1502	0.000377769	0.018118	19	4	Down-regulated
Papio_anubis_ROBO2	-2.79501	-2.70282	14.9663	0.000378231	0.018118	19	4	Down-regulated
Papio_anubis_QKI	-2.0571	1.66099	16.1607	0.000378752	0.018118	19	4	Down-regulated
Papio_anubis_GBF1	-2.1135	-1.62338	15.016	0.000381635	0.0181701	19	4	Down-regulated
Papio_anubis_RAB3GAP1	-2.11443	-1.11902	15.4621	0.000381886	0.0181701	19	4	Down-regulated
Papio_anubis_TMEM260	-3.55771	-3.04789	20.664	0.000385354	0.018266	19	4	Down-regulated
Papio_anubis_RNF38	-3.04799	-2.81795	16.0461	0.000386883	0.0183009	19	4	Down-regulated
Sus_scrofa___FRMPD4	-1.5293	3.29667	16.0567	0.000389968	0.0184128	19	4	Down-regulated
Sus_scrofa___UNC5C	-1.61529	2.6736	16.0475	0.000391525	0.0184386	19	4	Down-regulated
Sus_scrofa___EXOSC6	-2.16828	-2.43195	14.3042	0.000392081	0.018441	19	4	Down-regulated
Sus_scrofa___ENSSSCG00000043280	-1.81378	2.14879	16.0244	0.000395385	0.0185009	19	4	Down-regulated
Sus_scrofa___NUDT5	-0.814492	3.61296	15.9847	0.000399524	0.0186706	19	4	Down-regulated
Sus_scrofa___ERMAP	-1.69775	-0.879071	15.6216	0.000402085	0.0187662	19	4	Down-regulated
Sus_scrofa___POF1B	-1.05687	0.674212	15.9806	0.000403727	0.0188093	19	4	Down-regulated
Sus_scrofa___PLIN3	-0.960526	4.26965	15.8931	0.000412128	0.0191207	19	4	Down-regulated
Sus_scrofa___FBXL4	-1.19434	4.63632	15.8857	0.00041315	0.0191207	19	4	Down-regulated
Sus_scrofa___ZNF579	-1.21963	1.28212	15.9038	0.000413347	0.0191207	19	4	Down-regulated
Sus_scrofa___KRT10	-1.0459	3.57267	15.8835	0.00041354	0.0191207	19	4	Down-regulated
Sus_scrofa___ADCY6	-1.02288	8.90051	15.8804	0.000413878	0.0191207	19	4	Down-regulated
Papio_anubis_ECHDC1	-3.51894	-2.93281	18.9046	0.00041589	0.0191894	19	4	Down-regulated
Sus_scrofa___KCNJ2	-1.1284	5.61208	15.8307	0.00042096	0.0193325	19	4	Down-regulated
Sus_scrofa___TPPP	-1.46425	3.45278	15.8271	0.000421643	0.0193325	19	4	Down-regulated
Sus_scrofa___MGST2	-1.20998	4.6803	15.8184	0.000422747	0.0193587	19	4	Down-regulated
Sus_scrofa___PPTC7	-1.04083	7.13684	15.8014	0.000425186	0.0193973	19	4	Down-regulated
Sus_scrofa___OPLAH	-0.972413	4.47718	15.7661	0.000430374	0.0195607	19	4	Down-regulated
Sus_scrofa___MFSD6	-0.705203	5.31028	15.7477	0.000433069	0.0196451	19	4	Down-regulated
Papio_anubis_DGKH	-2.61157	-2.55863	14.1548	0.00043439	0.0196451	19	4	Down-regulated
Sus_scrofa___ENSSSCG00000038633	-0.687782	4.76511	15.7292	0.000435831	0.0196858	19	4	Down-regulated
Sus_scrofa___CCDC93	-0.562296	8.0739	15.7101	0.000438681	0.01979	19	4	Down-regulated
Sus_scrofa___CFAP44	-1.24038	1.83176	15.6902	0.000443328	0.0199503	19	4	Down-regulated
Sus_scrofa___MSANTD3-TMEFF1	-0.717244	5.68236	15.6667	0.00044526	0.0199633	19	4	Down-regulated
Sus_scrofa___PRPF40B	-0.849601	4.75193	15.6526	0.000447424	0.0200357	19	4	Down-regulated
Sus_scrofa___BEST3	-1.00959	2.67342	15.6487	0.000448464	0.0200576	19	4	Down-regulated
Sus_scrofa___MTG1	-0.856962	3.48971	15.6313	0.000450815	0.020138	19	4	Down-regulated
Papio_anubis_ZZZ3	-2.34039	-2.14983	14.0774	0.000451423	0.0201405	19	4	Down-regulated
Sus_scrofa___SLC25A27	-1.11297	2.91548	15.6199	0.000452788	0.0201768	19	4	Down-regulated
Sus_scrofa___ASB4	-0.791814	8.56217	15.6121	0.000453674	0.0201915	19	4	Down-regulated
Sus_scrofa___CCDC34	-0.927339	2.80817	15.6034	0.000455382	0.0202428	19	4	Down-regulated
Papio_anubis_KAT7	-2.18295	-2.23293	13.9998	0.000459648	0.0203433	19	4	Down-regulated
Sus_scrofa___ACADSB	-0.712504	6.08492	15.5726	0.000459874	0.0203433	19	4	Down-regulated
Sus_scrofa___ENSSSCG00000041597	-1.56543	-0.215898	15.5197	0.000461096	0.0203726	19	4	Down-regulated
Papio_anubis_LRCH1	-2.65437	-2.84738	15.0003	0.000462687	0.0204028	19	4	Down-regulated
Sus_scrofa___NME6	-0.746534	3.6472	15.5541	0.000462899	0.0204028	19	4	Down-regulated
Sus_scrofa___ENSSSCG00000026387	-1.30881	0.469686	15.5709	0.000463999	0.0204129	19	4	Down-regulated
Sus_scrofa___PLEKHH3	-1.41482	3.94457	15.5456	0.000464248	0.0204129	19	4	Down-regulated
Papio_anubis_SPATS2L	-1.73355	0.277932	15.5459	0.000465783	0.0204557	19	4	Down-regulated
Sus_scrofa___SMO	-0.697781	5.00912	15.5168	0.000468796	0.0205633	19	4	Down-regulated
Papio_anubis_ATP8A1	-2.45783	-1.215	14.7205	0.000469881	0.0205861	19	4	Down-regulated
Sus_scrofa___ENSSSCG00000002438	-2.046	-2.12042	14.0282	0.000473984	0.020715	19	4	Down-regulated
Sus_scrofa___TARBP2	-0.947073	2.4527	15.4805	0.000475304	0.020715	19	4	Down-regulated
Sus_scrofa___ENSSSCG00000048674	-0.938692	6.57635	15.467	0.000476898	0.0207439	19	4	Down-regulated
Papio_anubis_MAP4K5	-2.26666	-1.87835	14.1318	0.000480978	0.0208965	19	4	Down-regulated
Sus_scrofa___RAB20	-1.14584	5.81155	15.4369	0.000481864	0.0209034	19	4	Down-regulated
Papio_anubis_RAB12	-2.0165	-1.63124	14.4214	0.000483419	0.0209034	19	4	Down-regulated
Sus_scrofa___ENSSSCG00000046228	-1.64469	0.0776115	15.4241	0.000483518	0.0209034	19	4	Down-regulated
Papio_anubis_EEF1AKMT2	-1.97451	-2.23455	13.9295	0.00048365	0.0209034	19	4	Down-regulated
Sus_scrofa___SSRP1	-0.815793	3.70874	15.4182	0.000485075	0.0209034	19	4	Down-regulated
Papio_anubis_EXOC6B	-2.23831	-0.392197	15.2212	0.000486299	0.0209034	19	4	Down-regulated
Sus_scrofa___ENSSSCG00000050420	-2.47671	-2.7361	14.1273	0.000489259	0.0210059	19	4	Down-regulated
Sus_scrofa___FN3K	-1.00788	3.45215	15.3708	0.000493145	0.0211019	19	4	Down-regulated
Sus_scrofa___LNP1	-1.72349	3.40489	15.3412	0.000498295	0.0211799	19	4	Down-regulated
Sus_scrofa___ENSSSCG00000032969	-0.652952	4.49777	15.3355	0.000499065	0.0211799	19	4	Down-regulated
Sus_scrofa___PRDM14	-1.48045	-0.261998	15.2625	0.000503348	0.0212602	19	4	Down-regulated
Sus_scrofa___TRUB2	-0.801606	4.10768	15.2837	0.000508116	0.021412	19	4	Down-regulated
Sus_scrofa___KCNE3	-1.78664	-0.861225	14.9177	0.0005126	0.0215511	19	4	Down-regulated
Sus_scrofa___ENSSSCG00000038202	-0.829817	5.74966	15.253	0.000513502	0.0215641	19	4	Down-regulated
Sus_scrofa___FAH	-1.15605	2.78263	15.25	0.000514483	0.0215805	19	4	Down-regulated
Sus_scrofa___OSBPL5	-1.02791	5.97752	15.2324	0.000517184	0.0216467	19	4	Down-regulated
Papio_anubis_CBL	-1.96265	-1.48267	14.3782	0.00051725	0.0216467	19	4	Down-regulated
Papio_anubis_JMJD1C	-2.26685	-1.58545	14.2028	0.000520158	0.0217434	19	4	Down-regulated
Papio_anubis_MAP3K5	-2.71342	-2.41973	13.6491	0.000521725	0.0217779	19	4	Down-regulated
Sus_scrofa___DHCR24	-1.49322	2.65755	15.2077	0.000522273	0.0217779	19	4	Down-regulated
Sus_scrofa___SGPL1	-0.816177	5.8617	15.2014	0.000522775	0.0217779	19	4	Down-regulated
Sus_scrofa___ENSSSCG00000001612	-0.972776	1.95063	15.1973	0.000524938	0.0218223	19	4	Down-regulated
Sus_scrofa___GNAO1	-1.66373	5.395	15.1732	0.000527921	0.0218738	19	4	Down-regulated
Sus_scrofa___LDB1	-0.795227	4.41815	15.1661	0.00052926	0.0218738	19	4	Down-regulated
Sus_scrofa___STRIP2	-0.962643	6.59219	15.1639	0.000529619	0.0218738	19	4	Down-regulated
Sus_scrofa___EHMT2	-1.12537	2.16345	15.1686	0.000529877	0.0218738	19	4	Down-regulated
Sus_scrofa___UBXN6	-0.760644	4.23511	15.1316	0.000535648	0.0220472	19	4	Down-regulated
Sus_scrofa___LAMB2	-1.22365	4.36831	15.1197	0.000537867	0.0220786	19	4	Down-regulated
Sus_scrofa___ACAA2	-1.06838	5.08883	15.1044	0.000540704	0.0221452	19	4	Down-regulated
Sus_scrofa___SIAE	-0.70484	5.0996	15.0976	0.000541984	0.0221727	19	4	Down-regulated
Sus_scrofa___DENND2B	-0.989248	5.16377	15.0824	0.000544851	0.02224	19	4	Down-regulated
Papio_anubis_MFN1	-2.24682	-2.16144	13.6241	0.000546189	0.0222697	19	4	Down-regulated
Papio_anubis_MAPKAPK5	-1.96957	-2.07092	13.7613	0.000550685	0.022428	19	4	Down-regulated
Sus_scrofa___ENSSSCG00000039476	-0.894165	6.26531	15.0381	0.000553326	0.0225104	19	4	Down-regulated
Sus_scrofa___SPATA45	-1.20664	-0.0973183	15.005	0.000558626	0.02264	19	4	Down-regulated
Papio_anubis_ZMYND8	-1.52204	-1.2672	14.4882	0.000558997	0.02264	19	4	Down-regulated
Sus_scrofa___SEMA4C	-1.20574	1.52068	15.006	0.000562296	0.0226979	19	4	Down-regulated
Papio_anubis_IVNS1ABP	-1.64903	0.0613864	14.9143	0.00057672	0.0231011	19	4	Down-regulated
Sus_scrofa___MPPE1	-0.927891	2.58738	14.906	0.000580022	0.0231824	19	4	Down-regulated
Sus_scrofa___SHAS2	-1.84676	0.723588	14.8831	0.00058879	0.0234814	19	4	Down-regulated
Sus_scrofa___KBTBD6	-0.794216	2.68189	14.856	0.000590153	0.02351	19	4	Down-regulated
Sus_scrofa___ENSSSCG00000001433	-0.847022	2.71248	14.8342	0.000594646	0.0236304	19	4	Down-regulated
Sus_scrofa___RGP1	-0.875969	1.43883	14.8432	0.000595119	0.0236304	19	4	Down-regulated
Sus_scrofa___NOC4L	-0.856929	1.24906	14.8087	0.000602961	0.0238638	19	4	Down-regulated
Papio_anubis_ABLIM1	-1.6963	0.414721	14.7674	0.000611924	0.0240618	19	4	Down-regulated
Sus_scrofa___RGS11	-1.40807	1.92919	14.7407	0.00061598	0.0241691	19	4	Down-regulated
Sus_scrofa___ENSSSCG00000046510	-1.68762	-0.166792	14.6723	0.000620034	0.024292	19	4	Down-regulated
Sus_scrofa___GPD1	-0.777192	3.26041	14.7119	0.000620445	0.024292	19	4	Down-regulated
Papio_anubis_SCFD1	-2.30466	-2.18243	13.2917	0.000626172	0.0244899	19	4	Down-regulated
Papio_anubis_CHN1	-1.61028	-0.485422	14.5619	0.000629518	0.0245681	19	4	Down-regulated
Papio_anubis_REV1	-2.26377	-2.26039	13.2042	0.000637464	0.0247707	19	4	Down-regulated
Papio_anubis_CLASP2	-2.40924	-2.12284	13.2373	0.000641982	0.0248681	19	4	Down-regulated
Sus_scrofa___LRCH1	-0.622927	8.26728	14.6086	0.000643189	0.0248831	19	4	Down-regulated
Sus_scrofa___PRKCG	-2.1382	3.63346	14.6073	0.000643734	0.0248831	19	4	Down-regulated
Papio_anubis_MARCHF6	-2.5183	-2.58981	13.1855	0.000652618	0.0250143	19	4	Down-regulated
Sus_scrofa___ARG1	-1.7269	1.76906	14.5627	0.000656595	0.0251403	19	4	Down-regulated
Papio_anubis_DOP1A	-2.26569	-2.29831	13.1108	0.000659159	0.025212	19	4	Down-regulated
Sus_scrofa___INPP5E	-0.853025	2.66175	14.5376	0.000660067	0.0252202	19	4	Down-regulated
Sus_scrofa___KCNK6	-1.36797	2.30093	14.4859	0.000672916	0.0255489	19	4	Down-regulated
Sus_scrofa___NUDT19	-1.09752	1.53394	14.4903	0.000673576	0.0255489	19	4	Down-regulated
Sus_scrofa___DGKZ	-0.875628	7.22869	14.4673	0.000676094	0.0255846	19	4	Down-regulated
Sus_scrofa___ENSSSCG00000037703	-2.32874	-2.66597	13.1415	0.000677307	0.0255846	19	4	Down-regulated
Papio_anubis_RBFOX1	-1.7295	0.270359	14.4692	0.000677589	0.0255846	19	4	Down-regulated
Papio_anubis_CASD1	-1.56099	-0.978559	14.1514	0.00067835	0.0255846	19	4	Down-regulated
Sus_scrofa___ENSSSCG00000033232	-0.676517	3.49123	14.4317	0.000684823	0.0257481	19	4	Down-regulated
Sus_scrofa___ENSSSCG00000050670	-2.27216	-2.70654	13.1752	0.000686071	0.0257481	19	4	Down-regulated
Papio_anubis_UQCC	-2.9493	-2.92547	14.9518	0.000686488	0.0257481	19	4	Down-regulated
Sus_scrofa___ISOC2	-0.793483	3.39363	14.4158	0.000688715	0.0257481	19	4	Down-regulated
Sus_scrofa___CDC25B	-1.06195	4.13386	14.4109	0.000689797	0.0257556	19	4	Down-regulated
Papio_anubis_RNF207	-1.37563	-0.418239	14.2997	0.000700463	0.0260537	19	4	Down-regulated
Papio_anubis_PCNX1	-2.46495	-2.55911	12.993	0.000705163	0.026175	19	4	Down-regulated
Sus_scrofa___ENSSSCG00000013453	-0.768249	3.66802	14.3325	0.000709299	0.0263018	19	4	Down-regulated
Sus_scrofa___ENSSSCG00000021448	-1.85171	-0.522415	14.1525	0.000714597	0.0263922	19	4	Down-regulated
Papio_anubis_DNAJC7	-2.37654	-2.61818	12.9648	0.000715065	0.0263922	19	4	Down-regulated
Sus_scrofa___AK1	-1.06732	3.95887	14.2847	0.000721406	0.026557	19	4	Down-regulated
Papio_anubis_GK	-2.65344	-2.77959	13.509	0.000724287	0.0266139	19	4	Down-regulated
Sus_scrofa___XPOT	-0.864626	3.54129	14.2679	0.000725788	0.0266422	19	4	Down-regulated
Sus_scrofa___ABCC8	-1.06065	2.17004	14.2444	0.000733102	0.0268296	19	4	Down-regulated
Sus_scrofa___TTC7A	-1.11069	4.59386	14.2268	0.000736362	0.0269219	19	4	Down-regulated
Sus_scrofa___SPATS2	-0.882235	5.78103	14.1991	0.000743626	0.0271059	19	4	Down-regulated
Sus_scrofa___ANKRD16	-0.854201	3.80541	14.1492	0.000757095	0.0275143	19	4	Down-regulated
Sus_scrofa___MTHFD1	-0.766265	5.11375	14.1329	0.000761406	0.0276434	19	4	Down-regulated
Sus_scrofa___SBK2	-1.34873	1.14225	14.14	0.000764505	0.027669	19	4	Down-regulated
Papio_anubis_SASH1	-3.3089	-2.90653	15.4603	0.000766016	0.027669	19	4	Down-regulated
Sus_scrofa___RORA	-1.00199	9.42987	14.1098	0.000767691	0.027669	19	4	Down-regulated
Sus_scrofa___LACTB2	-0.884655	4.77295	14.1094	0.000767823	0.027669	19	4	Down-regulated
Papio_anubis_HAT1	-2.41668	-2.65733	12.8498	0.000768182	0.027669	19	4	Down-regulated
Sus_scrofa___ENSSSCG00000012664	-1.31208	-1.47964	13.5004	0.000772168	0.0277577	19	4	Down-regulated
Papio_anubis_ENSPANG00000044173	-1.39989	-1.19935	13.6517	0.000781316	0.0279487	19	4	Down-regulated
Sus_scrofa___ENSSSCG00000047930	-1.78329	-2.4368	12.6537	0.000796156	0.0283682	19	4	Down-regulated
Sus_scrofa___CLIP3	-1.14573	3.70946	13.9954	0.000799901	0.0283906	19	4	Down-regulated
Sus_scrofa___ENSSSCG00000049903	-2.00107	-2.14835	12.7294	0.000810529	0.0286841	19	4	Down-regulated
Sus_scrofa___DHRS7B	-0.679102	3.88311	13.952	0.000812391	0.0287172	19	4	Down-regulated
Sus_scrofa___GRK3	-0.689547	7.05087	13.9061	0.000825786	0.0289752	19	4	Down-regulated
Sus_scrofa___TNK2	-1.42208	5.24739	13.9057	0.00082591	0.0289752	19	4	Down-regulated
Papio_anubis_SLF1	-2.19615	-2.34956	12.5585	0.00082838	0.0290339	19	4	Down-regulated
Sus_scrofa___LAPTM4B	-0.561227	7.37082	13.8942	0.0008293	0.0290382	19	4	Down-regulated
Sus_scrofa___ENSSSCG00000041499	-2.07819	4.54368	13.8856	0.000831949	0.0291031	19	4	Down-regulated
Papio_anubis_FHIP2A	-2.48222	-2.7332	12.8235	0.000834223	0.02911	19	4	Down-regulated
Sus_scrofa___ENSSSCG00000047493	-1.12019	1.37946	13.8894	0.000834925	0.02911	19	4	Down-regulated
Sus_scrofa___CCKAR	-1.62019	-2.22079	12.6852	0.000835342	0.02911	19	4	Down-regulated
Sus_scrofa___PAXBP1	-0.734922	7.61483	13.8519	0.000842005	0.0293141	19	4	Down-regulated
Papio_anubis_LUC7L2	-2.02415	-1.14746	13.335	0.000844715	0.029352	19	4	Down-regulated
Sus_scrofa___TIMP4	-1.80364	0.0408337	13.8237	0.000845594	0.029352	19	4	Down-regulated
Sus_scrofa___SUFU	-0.605916	6.73991	13.8368	0.000846583	0.029352	19	4	Down-regulated
Papio_anubis_RUFY1	-2.44794	-2.76947	12.9064	0.000848786	0.0293665	19	4	Down-regulated
Sus_scrofa___ACOX3	-0.734407	4.29831	13.8286	0.000849149	0.0293665	19	4	Down-regulated
Sus_scrofa___SGSM1	-1.23889	2.12205	13.8287	0.000850909	0.0293854	19	4	Down-regulated
Sus_scrofa___COPS7B	-0.838874	4.31778	13.8207	0.000851571	0.0293854	19	4	Down-regulated
Sus_scrofa___ENSSSCG00000040874	-1.89943	-1.1008	13.3744	0.000859462	0.0296108	19	4	Down-regulated
Papio_anubis_TENM3	-1.58869	-1.17603	13.3217	0.000877572	0.0300925	19	4	Down-regulated
Sus_scrofa___ZNF512B	-0.767547	4.05699	13.7315	0.000879424	0.0301277	19	4	Down-regulated
Papio_anubis_CDH13	-1.64675	-1.60511	12.9982	0.000884983	0.0302208	19	4	Down-regulated
Sus_scrofa___VSX1	-1.50031	-1.35356	13.2026	0.000885457	0.0302208	19	4	Down-regulated
Sus_scrofa___DLX6	-2.31974	-2.55114	12.416	0.000889446	0.030319	19	4	Down-regulated
Sus_scrofa___NCEH1	-0.861899	9.21038	13.6965	0.000890513	0.030319	19	4	Down-regulated
Papio_anubis_TM9SF4	-1.89318	-1.52982	12.9717	0.000892186	0.0303368	19	4	Down-regulated
Sus_scrofa___PPFIBP2	-0.855101	7.1818	13.6856	0.000894011	0.0303706	19	4	Down-regulated
Sus_scrofa___ERI2	-1.17245	2.37501	13.6776	0.000897839	0.0304722	19	4	Down-regulated
Sus_scrofa___LIG3	-0.597515	4.592	13.6413	0.000908477	0.0307188	19	4	Down-regulated
Sus_scrofa___HAO2	-0.704499	5.50861	13.6208	0.000915214	0.0309147	19	4	Down-regulated
Sus_scrofa___ADRA1A	-1.95106	6.54062	13.6114	0.00091832	0.0309655	19	4	Down-regulated
Papio_anubis_GOLGA4	-2.17642	-0.781198	13.3133	0.000920826	0.0310213	19	4	Down-regulated
Sus_scrofa___DERL1	-0.728713	6.78131	13.5918	0.000924857	0.0310878	19	4	Down-regulated
Sus_scrofa___HIBCH	-0.634502	7.1013	13.5892	0.00092575	0.0310878	19	4	Down-regulated
Sus_scrofa___MALT1	-0.900592	7.46463	13.5886	0.000925933	0.0310878	19	4	Down-regulated
Sus_scrofa___ROS1	-2.06914	3.72065	13.5657	0.000933943	0.0312897	19	4	Down-regulated
Sus_scrofa___LIN9	-0.821042	2.97308	13.5556	0.00093753	0.0313783	19	4	Down-regulated
Sus_scrofa___UBAC1	-0.722701	5.49543	13.5374	0.000943288	0.0314782	19	4	Down-regulated
Sus_scrofa___KLKB1	-1.5792	-1.75231	12.7295	0.000943888	0.0314782	19	4	Down-regulated
Sus_scrofa___FKBPL	-1.2976	-0.332094	13.4978	0.000945094	0.031481	19	4	Down-regulated
Sus_scrofa___PTDSS2	-0.682795	4.48368	13.517	0.000950333	0.0315201	19	4	Down-regulated
Sus_scrofa___NUMA1	-0.582113	6.04713	13.5075	0.000953584	0.0315992	19	4	Down-regulated
Sus_scrofa___ENSSSCG00000049081	-1.51078	0.946403	13.501	0.000962608	0.0317984	19	4	Down-regulated
Sus_scrofa___ENSSSCG00000027557	-0.616761	7.68753	13.4802	0.000963086	0.0317984	19	4	Down-regulated
Sus_scrofa___IDH3G	-0.794406	3.86046	13.4676	0.000967626	0.0319194	19	4	Down-regulated
Papio_anubis_WASHC3	-2.46102	-2.46755	12.1892	0.000970706	0.0319603	19	4	Down-regulated
Sus_scrofa___ENSSSCG00000043798	-1.23595	-0.68612	13.3384	0.000971168	0.0319603	19	4	Down-regulated
Sus_scrofa___ENSSSCG00000029696	-3.16862	-3.20326	16.4037	0.000973082	0.0319836	19	4	Down-regulated
Sus_scrofa___FANCA	-1.08609	2.21224	13.4365	0.000980093	0.032185	19	4	Down-regulated
Sus_scrofa___SLC25A19	-0.921641	2.37518	13.4208	0.000985282	0.0323263	19	4	Down-regulated
Papio_anubis_SLC25A13	-2.04788	-2.32875	12.1898	0.000988405	0.0323705	19	4	Down-regulated
Sus_scrofa___ENSSSCG00000041491	-1.47647	-0.282017	13.3615	0.000989704	0.0323773	19	4	Down-regulated
Sus_scrofa___CD99L2	-0.611827	5.97311	13.3911	0.0009948	0.0324633	19	4	Down-regulated
Papio_anubis_ABCC5	-2.46294	-2.89272	12.9488	0.000995968	0.0324651	19	4	Down-regulated
Sus_scrofa___ATP4B	-1.5547	2.2338	13.3894	0.000997422	0.0324651	19	4	Down-regulated
Sus_scrofa___ENSSSCG00000037995	-1.23575	1.25414	13.3635	0.0010104	0.0327087	19	4	Down-regulated
Sus_scrofa___ZNF532	-0.701705	7.21417	13.3243	0.00101932	0.0328801	19	4	Down-regulated
Sus_scrofa___KLHL32	-0.963944	6.88358	13.2867	0.0010334	0.0331297	19	4	Down-regulated
Sus_scrofa___ZDHHC23	-0.899358	2.46285	13.2736	0.00103943	0.0332732	19	4	Down-regulated
Papio_anubis_HM13	-1.96548	-2.35451	12.028	0.0010516	0.0334775	19	4	Down-regulated
Sus_scrofa___P3H1	-0.611133	6.33736	13.2312	0.00105457	0.0335137	19	4	Down-regulated
Sus_scrofa___ENSSSCG00000002877	-0.705189	5.914	13.2068	0.00106403	0.0337261	19	4	Down-regulated
Sus_scrofa___LHPP	-0.711552	5.5666	13.2	0.00106669	0.033781	19	4	Down-regulated
Papio_anubis_SOX6	-1.35495	1.50441	13.1943	0.00107362	0.0338724	19	4	Down-regulated
Sus_scrofa___NUDT2	-0.755232	3.64742	13.1812	0.00107422	0.0338724	19	4	Down-regulated
Sus_scrofa___RPAP1	-0.748124	4.4586	13.1784	0.00107519	0.0338737	19	4	Down-regulated
Papio_anubis_OXR1	-2.55912	-2.86311	12.7442	0.00107926	0.0339432	19	4	Down-regulated
Sus_scrofa___ENSSSCG00000014799	-1.07608	2.08388	13.1696	0.00108069	0.0339535	19	4	Down-regulated
Sus_scrofa___VOPP1	-1.01118	5.70968	13.1625	0.00108145	0.0339535	19	4	Down-regulated
Sus_scrofa___ARHGAP18	-1.15401	4.21866	13.1558	0.0010842	0.0339811	19	4	Down-regulated
Sus_scrofa___RASGRP2	-1.57052	2.03239	13.1525	0.00108821	0.0340483	19	4	Down-regulated
Sus_scrofa___BICC1	-1.52515	2.61199	13.1431	0.00109034	0.0340684	19	4	Down-regulated
Sus_scrofa___AARS2	-0.936136	3.1577	13.1402	0.00109072	0.0340684	19	4	Down-regulated
Sus_scrofa___FBXW9	-0.985405	0.850157	13.1514	0.00109304	0.0341116	19	4	Down-regulated
Papio_anubis_ENSPANG00000050001	-1.76553	-0.179828	13.073	0.00109993	0.0342669	19	4	Down-regulated
Papio_anubis_ERLIN1	-1.11616	0.895836	13.1335	0.00110021	0.0342669	19	4	Down-regulated
Sus_scrofa___ENSSSCG00000047979	-1.83266	-2.45399	11.8996	0.00110083	0.0342669	19	4	Down-regulated
Sus_scrofa___ENSSSCG00000045087	-2.54576	-2.86554	12.6868	0.00110211	0.0342772	19	4	Down-regulated
Sus_scrofa___ILVBL	-0.818641	3.36929	13.097	0.00110801	0.0344022	19	4	Down-regulated
Sus_scrofa___GPCPD1	-1.03844	7.16967	13.0911	0.00111012	0.0344091	19	4	Down-regulated
Papio_anubis_CHD9	-1.98445	-0.734123	12.8778	0.00111172	0.0344108	19	4	Down-regulated
Sus_scrofa___TRPM4	-1.07394	4.11182	13.0547	0.0011252	0.03467	19	4	Down-regulated
Sus_scrofa___ENSSSCG00000036822	-1.67931	1.31674	13.0604	0.0011293	0.034767	19	4	Down-regulated
Sus_scrofa___DDX17	-0.500714	8.95899	13.038	0.001132	0.0348011	19	4	Down-regulated
Sus_scrofa___FAM3A	-0.612314	4.77579	13.0373	0.00113232	0.0348011	19	4	Down-regulated
Sus_scrofa___AGBL2	-0.82301	3.24837	13.0319	0.0011349	0.0348479	19	4	Down-regulated
Papio_anubis_SNX13	-2.19586	-1.75912	12.1705	0.00113575	0.0348479	19	4	Down-regulated
Sus_scrofa___GCN1	-0.591089	5.8856	13.0212	0.00113901	0.0348748	19	4	Down-regulated
Papio_anubis_GLS	-1.96682	0.340887	13.0263	0.0011395	0.0348748	19	4	Down-regulated
Sus_scrofa___ENSSSCG00000005982	-0.770121	4.03208	13.0059	0.00114554	0.0349998	19	4	Down-regulated
Papio_anubis_HNRNPH3	-1.985	-1.51538	12.358	0.00114601	0.0349998	19	4	Down-regulated
Sus_scrofa___ZDHHC8	-1.32811	3.02728	12.9962	0.00115016	0.0350539	19	4	Down-regulated
Sus_scrofa___B3GALNT1	-1.01666	4.8162	12.9899	0.00115225	0.035059	19	4	Down-regulated
Sus_scrofa___PSORS1C2	-1.16061	-0.0644014	12.9734	0.00115879	0.0352285	19	4	Down-regulated
Sus_scrofa___SLC41A1	-0.861792	7.3861	12.959	0.00116541	0.0353121	19	4	Down-regulated
Sus_scrofa___ENSSSCG00000044648	-1.91268	-0.131332	12.9089	0.00117129	0.0354018	19	4	Down-regulated
Sus_scrofa___STK11IP	-1.02909	1.37815	12.9542	0.00117265	0.0354137	19	4	Down-regulated
Papio_anubis_WAC	-2.01392	-0.934456	12.6121	0.00118233	0.0356468	19	4	Down-regulated
Sus_scrofa___PCGF2	-0.71692	2.38816	12.9157	0.00118538	0.0357054	19	4	Down-regulated
Sus_scrofa___THRA	-1.00105	5.79181	12.8918	0.00119467	0.0358707	19	4	Down-regulated
Papio_anubis_PTPRK	-1.88876	-2.01008	11.8671	0.00123121	0.0367259	19	4	Down-regulated
Papio_anubis_WDR11	-2.63433	-2.8402	12.4036	0.00123325	0.0367265	19	4	Down-regulated
Sus_scrofa___ENSSSCG00000047489	-2.88389	-3.23127	15.1956	0.00124605	0.0369645	19	4	Down-regulated
Sus_scrofa___BCL11A	-0.639149	6.39473	12.7375	0.00126485	0.0373435	19	4	Down-regulated
Sus_scrofa___ENSSSCG00000042944	-1.52023	-1.14299	12.3725	0.0012746	0.037559	19	4	Down-regulated
Sus_scrofa___TMEM266	-1.11741	5.73236	12.7111	0.00127731	0.0376085	19	4	Down-regulated
Sus_scrofa___GASK1B	-1.41344	5.70606	12.6447	0.0013092	0.0383614	19	4	Down-regulated
Sus_scrofa___EPB41L1	-0.727227	6.3861	12.6329	0.00131498	0.0384689	19	4	Down-regulated
Sus_scrofa___TFDP1	-0.950703	2.91373	12.6159	0.00132397	0.0387009	19	4	Down-regulated
Papio_anubis_LRRC28	-2.6023	-2.74003	11.8317	0.00132924	0.0388239	19	4	Down-regulated
Sus_scrofa___PXYLP1	-1.00728	6.49324	12.5951	0.0013336	0.0389201	19	4	Down-regulated
Papio_anubis_STK39	-2.05783	-2.26746	11.4781	0.00135315	0.0393331	19	4	Down-regulated
Sus_scrofa___ENSSSCG00000043694	-0.975454	4.10798	12.5461	0.00135827	0.0394505	19	4	Down-regulated
Papio_anubis_SKIC3	-2.09357	-2.02195	11.5909	0.00135972	0.0394612	19	4	Down-regulated
Sus_scrofa___EFEMP2	-0.829856	2.4876	12.5352	0.00136491	0.0395802	19	4	Down-regulated
Sus_scrofa___PLCG1	-0.830622	1.90829	12.5219	0.00137328	0.0397597	19	4	Down-regulated
Papio_anubis_ADGRL2	-2.06703	-2.72275	11.4709	0.00138161	0.0398656	19	4	Down-regulated
Sus_scrofa___ENSSSCG00000017577	-0.950076	0.819419	12.5155	0.00138236	0.0398656	19	4	Down-regulated
Papio_anubis_FNDC3A	-2.0712	-1.97977	11.5839	0.00138672	0.0399268	19	4	Down-regulated
Papio_anubis_APPL1	-1.73453	-0.955657	12.2289	0.00139578	0.0400798	19	4	Down-regulated
Sus_scrofa___SLC2A10	-1.75079	1.18815	12.4856	0.00139738	0.0400798	19	4	Down-regulated
Sus_scrofa___MRPL33	-0.672097	5.18391	12.4649	0.00139998	0.0400868	19	4	Down-regulated
Sus_scrofa___RAC3	-0.940169	1.94868	12.4615	0.00140453	0.0401072	19	4	Down-regulated
Papio_anubis_LARP7	-1.77664	-0.905281	12.1997	0.00140497	0.0401072	19	4	Down-regulated
Sus_scrofa___GRTP1	-0.742595	3.26252	12.4537	0.00140619	0.0401072	19	4	Down-regulated
Papio_anubis_SRP72	-2.05288	-2.6439	11.3819	0.00140963	0.0401426	19	4	Down-regulated
Sus_scrofa___CNTROB	-0.751614	3.42089	12.4427	0.0014119	0.0401757	19	4	Down-regulated
Sus_scrofa___ZSCAN16	-0.922051	3.44814	12.4356	0.0014157	0.0402524	19	4	Down-regulated
Sus_scrofa___ZNF704	-1.04283	7.84257	12.4289	0.00141894	0.0402728	19	4	Down-regulated
Sus_scrofa___FADD	-1.02312	1.39529	12.4318	0.00142304	0.0402728	19	4	Down-regulated
Sus_scrofa___PALM2AKAP2	-0.783263	9.79335	12.4165	0.0014255	0.0402836	19	4	Down-regulated
Sus_scrofa___OR52E4	-1.31072	0.024432	12.4184	0.00142564	0.0402836	19	4	Down-regulated
Sus_scrofa___ST6GAL1	-1.38977	3.35912	12.3757	0.00144788	0.0408226	19	4	Down-regulated
Papio_anubis_CAPRIN2	-1.90376	-1.36157	11.8594	0.00144807	0.0408226	19	4	Down-regulated
Papio_anubis_GPATCH8	-1.78135	-0.808314	12.1667	0.00145917	0.0410796	19	4	Down-regulated
Papio_anubis_PRKACB	-2.45122	-2.38194	11.2568	0.00145944	0.0410796	19	4	Down-regulated
Sus_scrofa___DNAL4	-0.695282	2.83854	12.3484	0.00146309	0.0411506	19	4	Down-regulated
Sus_scrofa___ENSSSCG00000044650	-1.90653	-1.94941	11.4965	0.0014666	0.0412173	19	4	Down-regulated
Sus_scrofa___CYRIA	-0.849509	6.38028	12.3259	0.00147473	0.0414139	19	4	Down-regulated
Sus_scrofa___IFT88	-0.63984	5.5575	12.3181	0.00147909	0.0414407	19	4	Down-regulated
Papio_anubis_ZNF292	-1.90845	0.0266844	12.293	0.00148437	0.0415568	19	4	Down-regulated
Sus_scrofa___RGN	-0.936916	1.27046	12.3099	0.00149019	0.0416492	19	4	Down-regulated
Sus_scrofa___ENSSSCG00000021305	-1.93901	-1.58773	11.6483	0.00149339	0.0416492	19	4	Down-regulated
Papio_anubis_FCHO2	-2.01525	-1.5624	11.662	0.00149937	0.0416898	19	4	Down-regulated
Papio_anubis_HELZ	-1.84297	-0.953894	12.0252	0.00150118	0.0416898	19	4	Down-regulated
Sus_scrofa___ENSSSCG00000049585	-2.04529	0.51782	12.2865	0.00150258	0.0416898	19	4	Down-regulated
Sus_scrofa___SELP	-1.66223	-0.262906	12.2353	0.00150332	0.0416898	19	4	Down-regulated
Sus_scrofa___TCEA3	-0.706615	6.17207	12.2736	0.001504	0.0416898	19	4	Down-regulated
Sus_scrofa___SLC25A37	-0.664018	5.61048	12.2726	0.00150458	0.0416898	19	4	Down-regulated
Papio_anubis_MACF1	-1.72077	1.71262	12.2814	0.00150514	0.0416898	19	4	Down-regulated
Papio_anubis_DPP4	-1.78862	-1.99505	11.3969	0.00151757	0.0419386	19	4	Down-regulated
Sus_scrofa___KLC4	-0.687093	4.14908	12.2409	0.00152274	0.0419859	19	4	Down-regulated
Sus_scrofa___CAMKV	-1.97261	-1.04229	11.8627	0.00152697	0.0420064	19	4	Down-regulated
Sus_scrofa___ENSSSCG00000028794	-0.836354	4.82326	12.232	0.00152776	0.0420064	19	4	Down-regulated
Sus_scrofa___ENSSSCG00000048552	-1.38752	-0.662961	12.1209	0.0015357	0.0421202	19	4	Down-regulated
Sus_scrofa___PPIL2	-0.594808	4.8655	12.206	0.00154276	0.0422821	19	4	Down-regulated
Sus_scrofa___CORIN	-1.13855	9.76657	12.1891	0.00155257	0.0423915	19	4	Down-regulated
Sus_scrofa___TMEM106C	-0.879986	3.39083	12.1843	0.00155573	0.0424143	19	4	Down-regulated
Sus_scrofa___ENSSSCG00000047922	-0.928829	1.66323	12.1798	0.00156239	0.0424372	19	4	Down-regulated
Sus_scrofa___EXOC7	-0.682563	4.59859	12.162	0.00156858	0.0425576	19	4	Down-regulated
Sus_scrofa___AKNA	-1.10664	1.94674	12.1435	0.00158273	0.0428301	19	4	Down-regulated
Papio_anubis_TTC7B	-2.09378	-2.19821	11.1619	0.00158601	0.0428569	19	4	Down-regulated
Papio_anubis_LCOR	-2.17281	-1.30765	11.6425	0.00158607	0.0428569	19	4	Down-regulated
Papio_anubis_HYPK	-2.4681	-2.82553	11.5408	0.00159318	0.0429852	19	4	Down-regulated
Papio_anubis_SUDS3	-1.13323	0.628396	12.1337	0.00159531	0.0430107	19	4	Down-regulated
Papio_anubis_MINDY3	-2.10178	-2.5257	11.044	0.00160228	0.0431276	19	4	Down-regulated
Sus_scrofa___ENSSSCG00000032124	-1.44745	-1.95739	11.3383	0.0016134	0.0432711	19	4	Down-regulated
Sus_scrofa___PTPN4	-0.885792	9.35784	12.0855	0.00161446	0.0432711	19	4	Down-regulated
Papio_anubis_PPIL4	-1.86088	-0.714404	11.8995	0.00161956	0.043297	19	4	Down-regulated
Sus_scrofa___GNLY	-3.95817	-3.09408	15.6358	0.00162018	0.043297	19	4	Down-regulated
Sus_scrofa___ENSSSCG00000036748	-1.18023	-0.729338	11.9717	0.00162612	0.0433604	19	4	Down-regulated
Sus_scrofa___ELP1	-0.592637	5.46134	12.0579	0.00163141	0.0433973	19	4	Down-regulated
Sus_scrofa___PPM1K	-0.93172	7.02856	12.057	0.00163196	0.0433973	19	4	Down-regulated
Papio_anubis_CCNL2	-1.39353	-0.012387	12.0474	0.00163579	0.0434343	19	4	Down-regulated
Sus_scrofa___ASPDH	-1.35545	11.049	12.0504	0.00163604	0.0434343	19	4	Down-regulated
Papio_anubis_SNX2	-1.89511	-1.34679	11.5573	0.00165236	0.0437224	19	4	Down-regulated
Sus_scrofa___ALKBH8	-0.661435	4.91105	12.0234	0.00165289	0.0437224	19	4	Down-regulated
Sus_scrofa___ANKRD27	-0.631266	5.85152	12.0207	0.00165454	0.0437343	19	4	Down-regulated
Sus_scrofa___INPPL1	-0.705005	4.1291	12.0149	0.0016583	0.0438019	19	4	Down-regulated
Papio_anubis_NFIA	-1.54581	-0.791839	11.8611	0.00166254	0.0438822	19	4	Down-regulated
Sus_scrofa___CARF	-0.578506	5.83393	11.9959	0.00167013	0.0440505	19	4	Down-regulated
Sus_scrofa___ASB18	-1.43632	6.83279	11.9838	0.00167784	0.0441884	19	4	Down-regulated
Papio_anubis_GRK3	-2.3272	-2.36532	10.9463	0.00167836	0.0441884	19	4	Down-regulated
Papio_anubis_UBE2G1	-2.85688	-3.07721	13.3847	0.00167899	0.0441884	19	4	Down-regulated
Sus_scrofa___SLC11A2	-0.653638	5.13776	11.9692	0.00168715	0.0443174	19	4	Down-regulated
Sus_scrofa___NRG2	-1.07807	0.0384779	11.9744	0.00168786	0.0443174	19	4	Down-regulated
Papio_anubis_RABGAP1	-2.04301	-1.87171	11.1869	0.00169026	0.0443251	19	4	Down-regulated
Sus_scrofa___CACNB2	-0.624628	12.2078	11.9545	0.00169657	0.0444452	19	4	Down-regulated
Sus_scrofa___GZMK	-1.4528	-0.708953	11.7934	0.00172266	0.0450127	19	4	Down-regulated
Sus_scrofa___ITPRID1	-1.44055	3.36956	11.899	0.00173314	0.0451894	19	4	Down-regulated
Papio_anubis_SLC30A6	-2.09687	-2.51707	10.8605	0.00174154	0.0452915	19	4	Down-regulated
Sus_scrofa___CACNA1E	-1.1668	3.7505	11.8852	0.00174203	0.0452915	19	4	Down-regulated
Sus_scrofa___ENSSSCG00000014746	-2.16959	-1.07861	11.5015	0.00174378	0.0453047	19	4	Down-regulated
Papio_anubis_DCP2	-1.56177	0.492145	11.8897	0.00174776	0.0453112	19	4	Down-regulated
Sus_scrofa___ICE2	-0.554094	6.5966	11.863	0.00175657	0.0455074	19	4	Down-regulated
Sus_scrofa___CASD1	-0.595906	6.18082	11.8582	0.00175976	0.0455408	19	4	Down-regulated
Sus_scrofa___SYN1	-0.838356	3.14503	11.8581	0.00176036	0.0455408	19	4	Down-regulated
Sus_scrofa___SERHL2	-0.982382	3.81288	11.8452	0.00176869	0.0456619	19	4	Down-regulated
Sus_scrofa___KLHL38	-1.1062	4.20782	11.8442	0.00176929	0.0456619	19	4	Down-regulated
Sus_scrofa___RRAD	-1.39969	8.30311	11.8343	0.00177584	0.0457141	19	4	Down-regulated
Sus_scrofa___TXLNB	-0.887579	8.80729	11.8158	0.00178839	0.0458752	19	4	Down-regulated
Sus_scrofa___DIPK2B	-1.31343	-0.144417	11.7942	0.00179806	0.0460652	19	4	Down-regulated
Sus_scrofa___GTF2I	-0.522177	7.57891	11.7832	0.00181075	0.0462742	19	4	Down-regulated
Sus_scrofa___OTUD3	-0.571635	4.21132	11.7804	0.0018128	0.0462742	19	4	Down-regulated
Sus_scrofa___LINC02210-CRHR1	-1.16519	0.652072	11.7954	0.00181324	0.0462742	19	4	Down-regulated
Sus_scrofa___DENND6B	-0.674071	4.55392	11.7766	0.00181537	0.0462742	19	4	Down-regulated
Papio_anubis_INTS4	-2.17467	-2.44393	10.7526	0.00182631	0.0463824	19	4	Down-regulated
Sus_scrofa___BEGAIN	-1.38991	-1.15745	11.4859	0.00182699	0.0463824	19	4	Down-regulated
Papio_anubis_ZC2HC1A	-2.05977	-2.51456	10.7481	0.00182892	0.0463824	19	4	Down-regulated
Sus_scrofa___ENSSSCG00000039331	-1.14179	4.91226	11.7559	0.00182974	0.0463824	19	4	Down-regulated
Sus_scrofa___TUBGCP5	-0.606648	4.59661	11.754	0.00183107	0.0463824	19	4	Down-regulated
Sus_scrofa___TRIP10	-0.861074	4.80049	11.7513	0.00183293	0.0463973	19	4	Down-regulated
Papio_anubis_VIPAS39	-2.28623	-2.69152	10.8718	0.00184033	0.0465523	19	4	Down-regulated
Sus_scrofa___ZNF260	-0.544753	5.38182	11.7378	0.00184236	0.0465713	19	4	Down-regulated
Sus_scrofa___ZNF2	-0.60231	4.68354	11.7237	0.00185236	0.0467916	19	4	Down-regulated
Sus_scrofa___SLC26A3	-0.987851	2.48189	11.7216	0.00185542	0.0468365	19	4	Down-regulated
Sus_scrofa___ENSSSCG00000017106	-0.67296	3.32984	11.7161	0.00185809	0.0468713	19	4	Down-regulated
Sus_scrofa___ENSSSCG00000051693	-1.68469	-1.76102	11.0347	0.00188537	0.0473956	19	4	Down-regulated
Papio_anubis_SMARCD1	-1.25827	-0.968124	11.4697	0.00191286	0.0478885	19	4	Down-regulated
Sus_scrofa___NUP43	-0.891502	1.98929	11.6419	0.00191431	0.0478918	19	4	Down-regulated
Sus_scrofa___ENSSSCG00000042410	-3.39269	-3.18159	14.1371	0.00191612	0.0479042	19	4	Down-regulated
Sus_scrofa___INTU	-0.636429	3.83661	11.6299	0.00192019	0.0479402	19	4	Down-regulated
Sus_scrofa___NCL	-0.706055	4.73221	11.6188	0.00192819	0.0480741	19	4	Down-regulated
Sus_scrofa___ZDHHC4	-0.773376	5.12548	11.5749	0.00196085	0.0486949	19	4	Down-regulated
Sus_scrofa___ENSSSCG00000031152	-1.05781	1.0312	11.5819	0.00196531	0.048733	19	4	Down-regulated
Sus_scrofa___MCTS1	-0.781196	3.29324	11.5516	0.00197888	0.0489588	19	4	Down-regulated
Sus_scrofa___PPP1R27	-1.19908	-0.599252	11.4817	0.00198113	0.0489588	19	4	Down-regulated
Sus_scrofa___CCDC22	-0.612001	4.18116	11.533	0.00199279	0.0491801	19	4	Down-regulated
Papio_anubis_CYRIB	-2.09814	-2.25281	10.6083	0.00199841	0.0492522	19	4	Down-regulated
Sus_scrofa___ENSSSCG00000035908	-1.47611	-0.803855	11.3863	0.00200424	0.0493465	19	4	Down-regulated
Sus_scrofa___RPF1	-0.633038	4.50851	11.5141	0.00200725	0.04937	19	4	Down-regulated
Sus_scrofa___JMJD8	-0.782151	2.08651	11.5056	0.0020165	0.0494972	19	4	Down-regulated
Sus_scrofa___TEAD2	-0.891231	2.58305	11.4919	0.00202577	0.0496913	19	4	Down-regulated
Sus_scrofa___GAA	-0.783283	3.41155	11.4855	0.00202974	0.0497552	19	4	Down-regulated
Papio_anubis_TMEM243	-1.92073	-2.23302	10.5875	0.0020392	0.0499537	19	4	Down-regulated

## Sheet: Endocardial lymphatic EC
Gene	logFC	logCPM	F	PValue	FDR	Observations_Transplanted	Observations_Control	level
Sus_scrofa___hCD46	8.48949	7.84808	117.277	3.23314e-12	6.71169e-08	18	4	Up-regulated
Sus_scrofa___SERPINE1	5.70158	9.09598	53.2611	1.20184e-08	2.77212e-05	18	4	Up-regulated
Sus_scrofa___VMP1	1.90745	8.51852	41.5843	2.00778e-07	0.000253007	18	4	Up-regulated
Sus_scrofa___ITGA1	3.31541	9.04745	38.8309	3.85464e-07	0.00038104	18	4	Up-regulated
Sus_scrofa___PLAUR	3.37222	6.62659	37.2451	4.5119e-07	0.000425739	18	4	Up-regulated
Sus_scrofa___ENO1	3.35107	7.25096	37.3643	5.0237e-07	0.000453422	18	4	Up-regulated
Sus_scrofa___HIF1A	2.59955	8.50605	34.5056	1.14044e-06	0.000845516	18	4	Up-regulated
Sus_scrofa___SLC20A2	2.58498	7.31775	34.129	1.24437e-06	0.000890751	18	4	Up-regulated
Sus_scrofa___ENSSSCG00000031037	5.09118	5.01349	29.3384	3.72923e-06	0.00188817	18	4	Up-regulated
Sus_scrofa___ENSSSCG00000012006	3.08302	6.33846	29.1189	4.02518e-06	0.00195671	18	4	Up-regulated
Sus_scrofa___LTBP1	2.6692	10.2571	27.8285	6.97381e-06	0.00277134	18	4	Up-regulated
Sus_scrofa___PPFIA2	2.95401	6.86809	27.5389	7.14242e-06	0.00277134	18	4	Up-regulated
Sus_scrofa___SPATA5	1.54088	8.47547	27.7556	7.15628e-06	0.00277134	18	4	Up-regulated
Sus_scrofa___IER3	5.12069	6.12784	27.3864	7.20904e-06	0.00277134	18	4	Up-regulated
Sus_scrofa___HK1	1.89121	7.891	27.2155	8.41485e-06	0.00303139	18	4	Up-regulated
Sus_scrofa___GCLM	4.0726	5.31919	26.0219	9.13689e-06	0.00314698	18	4	Up-regulated
Sus_scrofa___EXOSC5	5.31716	5.15375	26.6383	9.16435e-06	0.00314698	18	4	Up-regulated
Sus_scrofa___JADE1	2.15216	7.01284	26.7528	9.56365e-06	0.0031513	18	4	Up-regulated
Sus_scrofa___CCL2	4.85523	5.89357	25.9701	1.0742e-05	0.00333283	18	4	Up-regulated
Sus_scrofa___ENSSSCG00000046704	3.91298	5.19171	25.3237	1.08276e-05	0.00333283	18	4	Up-regulated
Sus_scrofa___TTC39B	2.47726	8.12414	26.0894	1.16664e-05	0.00341104	18	4	Up-regulated
Sus_scrofa___SLC41A2	5.28603	5.13216	24.9814	1.492e-05	0.00418547	18	4	Up-regulated
Sus_scrofa___PTP4A2	1.84147	7.21479	24.906	1.67195e-05	0.00450754	18	4	Up-regulated
Sus_scrofa___CCN1	5.79759	6.70981	24.3913	1.81787e-05	0.00483811	18	4	Up-regulated
Sus_scrofa___LPGAT1	1.90087	6.95936	23.9033	2.26045e-05	0.005596	18	4	Up-regulated
Sus_scrofa___PDE5A	2.33535	8.78404	23.6129	2.46105e-05	0.00584359	18	4	Up-regulated
Sus_scrofa___PTGIS	2.57656	7.47375	23.5761	2.4862e-05	0.00584359	18	4	Up-regulated
Sus_scrofa___SNAPC1	2.43867	7.01974	23.0205	2.93098e-05	0.00654238	18	4	Up-regulated
Sus_scrofa___CLIP1	1.85765	7.44955	22.9719	3.02897e-05	0.00659586	18	4	Up-regulated
Sus_scrofa___ITGA5	1.85678	7.08041	22.681	3.31451e-05	0.00689828	18	4	Up-regulated
Sus_scrofa___SAMD4A	1.71949	9.74054	22.2571	3.75276e-05	0.00749072	18	4	Up-regulated
Sus_scrofa___ENSSSCG00000022925	1.71824	7.38992	21.9287	4.21523e-05	0.00810223	18	4	Up-regulated
Sus_scrofa___RGS16	4.95966	4.92684	21.0937	4.58984e-05	0.00866186	18	4	Up-regulated
Sus_scrofa___EMC2	3.00226	5.89753	20.9747	4.71552e-05	0.00881888	18	4	Up-regulated
Sus_scrofa___AMOTL2	2.63302	6.64805	20.6517	6.0728e-05	0.0107748	18	4	Up-regulated
Sus_scrofa___NMD3	1.91136	6.25465	20.5519	6.28948e-05	0.0110647	18	4	Up-regulated
Sus_scrofa___ENSSSCG00000027270	2.98838	5.05761	18.9747	7.86443e-05	0.0133502	18	4	Up-regulated
Sus_scrofa___MRPS30	2.1149	5.72082	19.0313	9.48398e-05	0.0157502	18	4	Up-regulated
Sus_scrofa___SDHC	3.82057	5.15455	18.7247	9.69335e-05	0.0158444	18	4	Up-regulated
Sus_scrofa___BHLHE40	3.32317	5.32343	18.4448	0.000102159	0.016537	18	4	Up-regulated
Sus_scrofa___DNAAF2	3.23496	5.24499	18.2881	0.000106219	0.016832	18	4	Up-regulated
Sus_scrofa___PDLIM7	1.86901	6.46876	18.8621	0.000113157	0.01753	18	4	Up-regulated
Sus_scrofa___CCN2	3.39664	6.00285	18.355	0.000116141	0.017859	18	4	Up-regulated
Sus_scrofa___PRRG1	2.00903	6.39322	18.6839	0.000119026	0.0181681	18	4	Up-regulated
Sus_scrofa___ACO1	2.31628	6.11712	18.4783	0.00012184	0.0184045	18	4	Up-regulated
Sus_scrofa___CCDC58	3.63557	5.01506	17.9336	0.000123853	0.0184045	18	4	Up-regulated
Sus_scrofa___SEMA3F	2.78285	5.48756	18.0215	0.00012419	0.0184045	18	4	Up-regulated
Sus_scrofa___ENSSSCG00000031912	2.8468	6.27188	18.3539	0.000125008	0.0184045	18	4	Up-regulated
Sus_scrofa___TNC	5.12072	6.7476	18.0121	0.000132762	0.0191425	18	4	Up-regulated
Sus_scrofa___ENSSSCG00000035617	4.33386	5.50256	18.0826	0.000133127	0.0191425	18	4	Up-regulated
Sus_scrofa___HSPH1	2.45009	5.95938	17.9384	0.00014246	0.0200769	18	4	Up-regulated
Sus_scrofa___GALNT9	5.38837	5.18261	18.1082	0.000144545	0.0200831	18	4	Up-regulated
Sus_scrofa___TTC27	1.33964	6.64322	18.1858	0.000145116	0.0200831	18	4	Up-regulated
Sus_scrofa___NOCT	5.38678	5.21624	17.9635	0.000151867	0.0208782	18	4	Up-regulated
Sus_scrofa___CEMIP	5.58988	7.16886	17.611	0.000153142	0.020915	18	4	Up-regulated
Sus_scrofa___PGRMC1	2.53229	5.32437	17.1054	0.000168711	0.0216831	18	4	Up-regulated
Sus_scrofa___CTSH	2.23722	5.81444	17.4264	0.000169212	0.0216831	18	4	Up-regulated
Sus_scrofa___RRP8	2.84883	5.00833	16.6091	0.000186471	0.0235322	18	4	Up-regulated
Sus_scrofa___PTRH2	4.163	4.4743	16.542	0.000187042	0.0235322	18	4	Up-regulated
Sus_scrofa___GSTO1	4.41773	4.57497	16.6002	0.000193661	0.024174	18	4	Up-regulated
Sus_scrofa___SEC61A1	1.92999	5.60231	16.8053	0.000206202	0.0249816	18	4	Up-regulated
Sus_scrofa___ENSSSCG00000035544	1.68545	6.72232	17.1003	0.000211395	0.0250463	18	4	Up-regulated
Sus_scrofa___ADM	3.80763	6.35415	16.7293	0.000212349	0.0250463	18	4	Up-regulated
Sus_scrofa___GNL3	1.87445	5.67254	16.7514	0.000214806	0.025193	18	4	Up-regulated
Sus_scrofa___VWA8	1.64579	6.79116	16.9385	0.000224283	0.0257912	18	4	Up-regulated
Sus_scrofa___MINPP1	2.40687	5.66348	16.4473	0.000231671	0.0262801	18	4	Up-regulated
Sus_scrofa___VCL	1.61827	7.95555	16.7222	0.000242214	0.027179	18	4	Up-regulated
Sus_scrofa___SERTM1	5.36241	5.1439	16.5814	0.000246558	0.0274894	18	4	Up-regulated
Sus_scrofa___ENSSSCG00000034570	5.22964	7.90331	16.3477	0.000247629	0.0274894	18	4	Up-regulated
Sus_scrofa___CDA	5.5202	5.29282	16.4181	0.000269355	0.0295848	18	4	Up-regulated
Sus_scrofa___TPM4	1.69482	6.99754	16.3395	0.000278222	0.0302388	18	4	Up-regulated
Sus_scrofa___SLC7A2	2.99897	5.42295	15.7673	0.000279906	0.0302634	18	4	Up-regulated
Sus_scrofa___NUAK1	1.91045	7.54117	16.2769	0.000284429	0.03038	18	4	Up-regulated
Sus_scrofa___CCNT1	1.93798	6.50268	16.1737	0.000290189	0.0304806	18	4	Up-regulated
Sus_scrofa___HMG20B	4.48078	4.65172	15.5768	0.000290725	0.0304806	18	4	Up-regulated
Sus_scrofa___METTL21A	1.41227	6.36907	16.1437	0.000294782	0.0307506	18	4	Up-regulated
Sus_scrofa___SOD2	1.91788	6.28487	15.9942	0.000306161	0.0317779	18	4	Up-regulated
Sus_scrofa___KLHL5	1.65784	7.79582	16.0191	0.000311853	0.0322078	18	4	Up-regulated
Sus_scrofa___CLUH	3.41362	4.8807	15.3314	0.000315709	0.0324445	18	4	Up-regulated
Sus_scrofa___WDR37	1.51701	7.09606	15.9502	0.000320523	0.0327771	18	4	Up-regulated
Sus_scrofa___EMP2	1.65646	7.13497	15.8671	0.000330129	0.0335939	18	4	Up-regulated
Sus_scrofa___OMD	2.49257	5.538	15.3956	0.000335928	0.0340172	18	4	Up-regulated
Sus_scrofa___CXCL2	2.8498	7.8835	15.7769	0.000338887	0.0341502	18	4	Up-regulated
Sus_scrofa___PPP1R3B	4.34624	4.56505	15.0068	0.000352986	0.0351398	18	4	Up-regulated
Sus_scrofa___ZNF654	1.32477	7.35545	15.5193	0.000374774	0.0362412	18	4	Up-regulated
Sus_scrofa___YIPF2	1.54115	6.39099	15.3584	0.000392168	0.0371194	18	4	Up-regulated
Sus_scrofa___ELAPOR2	3.36021	6.2608	15.1079	0.000392826	0.0371194	18	4	Up-regulated
Sus_scrofa___ASNS	1.78906	6.04351	15.263	0.000393384	0.0371194	18	4	Up-regulated
Sus_scrofa___SNX18	2.612	5.57734	14.8626	0.000413222	0.0382363	18	4	Up-regulated
Sus_scrofa___CLCN5	1.27277	7.21099	15.2461	0.000414431	0.0382363	18	4	Up-regulated
Sus_scrofa___TEAD4	1.13626	6.99806	15.1884	0.000423417	0.0385514	18	4	Up-regulated
Sus_scrofa___PLVAP	3.5153	4.94434	14.5722	0.000434137	0.0393548	18	4	Up-regulated
Sus_scrofa___TXNL1	2.00477	6.39855	14.9967	0.000443377	0.0395084	18	4	Up-regulated
Sus_scrofa___ICAM1	4.15059	5.39381	14.7552	0.000443444	0.0395084	18	4	Up-regulated
Sus_scrofa___UQCC1	1.98638	6.1094	14.8356	0.00046202	0.0408573	18	4	Up-regulated
Sus_scrofa___MYLK	3.0046	7.24219	14.8839	0.000464094	0.0408573	18	4	Up-regulated
Sus_scrofa___SLC22A3	4.62205	6.32452	14.6118	0.000465932	0.0408573	18	4	Up-regulated
Sus_scrofa___GADD45B	2.66055	5.66866	14.5549	0.000469367	0.0408846	18	4	Up-regulated
Sus_scrofa___METAP1	1.62507	5.89739	14.7468	0.000472678	0.0408846	18	4	Up-regulated
Sus_scrofa___ENSSSCG00000043835	2.34949	6.90532	14.8343	0.000476538	0.0410476	18	4	Up-regulated
Sus_scrofa___AK5	2.27405	9.14208	14.7778	0.000489294	0.0417994	18	4	Up-regulated
Sus_scrofa___FGFR2	2.82481	5.55054	14.2383	0.000519543	0.0439238	18	4	Up-regulated
Sus_scrofa___TNFRSF1B	1.77081	5.96497	14.4934	0.000521434	0.0439238	18	4	Up-regulated
Sus_scrofa___HABP4	2.51405	5.71509	14.1173	0.000563807	0.0462611	18	4	Up-regulated
Sus_scrofa___FAN1	1.59389	6.07566	14.2698	0.000576237	0.046727	18	4	Up-regulated
Sus_scrofa___CSF1	1.93494	5.68193	14.0858	0.000584371	0.0470825	18	4	Up-regulated
Sus_scrofa___TRAF3IP2	1.24753	8.05908	14.2944	0.000587674	0.0470825	18	4	Up-regulated
Sus_scrofa___COL12A1	2.52345	7.68786	14.2602	0.000594834	0.0471304	18	4	Up-regulated
Sus_scrofa___GAS6	3.13257	4.73834	13.5991	0.000602357	0.047545	18	4	Up-regulated
Sus_scrofa___LTBP2	2.83145	5.29377	13.7173	0.000613833	0.0482673	18	4	Up-regulated
Sus_scrofa___ENSSSCG00000038594	3.69299	5.07253	13.7078	0.000628024	0.0490118	18	4	Up-regulated
Sus_scrofa___ACTN4	1.26366	7.93631	14.0533	0.000643974	0.0496961	18	4	Up-regulated
Sus_scrofa___MCTP1	-3.02278	6.68763	71.211	3.68513e-10	3.82498e-06	18	4	Down-regulated
Sus_scrofa___ENSSSCG00000015747	-3.42359	5.60108	58.6212	6.22804e-10	4.3096e-06	18	4	Down-regulated
Sus_scrofa___SCG3	-3.8147	5.58232	53.7618	1.61468e-09	8.37977e-06	18	4	Down-regulated
Sus_scrofa___CCDC3	-2.7955	7.35589	62.0893	2.82365e-09	1.17232e-05	18	4	Down-regulated
Sus_scrofa___MFSD4A	-2.92764	5.60098	52.0298	4.32649e-09	1.4969e-05	18	4	Down-regulated
Sus_scrofa___ENSSSCG00000000854	-3.26475	5.21759	47.3556	8.3672e-09	2.34243e-05	18	4	Down-regulated
Sus_scrofa___NCALD	-2.10012	7.51983	56.2626	9.02716e-09	2.34243e-05	18	4	Down-regulated
Sus_scrofa___MYL7	-4.53397	4.95204	46.092	1.43989e-08	2.98907e-05	18	4	Down-regulated
Sus_scrofa___PROM1	-2.90349	4.99688	42.9524	2.65484e-08	5.01016e-05	18	4	Down-regulated
Sus_scrofa___SGSM1	-2.6609	5.39523	43.732	3.02885e-08	5.23967e-05	18	4	Down-regulated
Sus_scrofa___ABI3BP	-2.30426	8.90523	43.7491	1.22414e-07	0.000194729	18	4	Down-regulated
Sus_scrofa___DTX1	-2.46492	6.93294	43.0988	1.31326e-07	0.000194729	18	4	Down-regulated
Sus_scrofa___GCNT3	-2.32974	6.42369	40.8186	1.92044e-07	0.000253007	18	4	Down-regulated
Sus_scrofa___CHP2	-2.40448	7.3173	41.3551	2.10443e-07	0.000253007	18	4	Down-regulated
Sus_scrofa___THSD1	-2.06401	6.24881	40.2079	2.19381e-07	0.000253007	18	4	Down-regulated
Sus_scrofa___SESN3	-2.35685	7.28036	40.4622	2.59943e-07	0.000284008	18	4	Down-regulated
Sus_scrofa___ENSSSCG00000004081	-2.51152	7.91464	39.0443	3.73179e-07	0.00038104	18	4	Down-regulated
Sus_scrofa___PTPRF	-2.5984	4.65163	32.5452	5.46589e-07	0.000472777	18	4	Down-regulated
Sus_scrofa___CCDC170	-1.92292	7.09401	37.1977	5.73315e-07	0.000475021	18	4	Down-regulated
Sus_scrofa___COX7A1	-3.37303	5.12557	32.3412	5.94948e-07	0.000475021	18	4	Down-regulated
Sus_scrofa___PTPRQ	-3.11971	4.38639	31.8604	7.33249e-07	0.00056376	18	4	Down-regulated
Sus_scrofa___ACSM5	-3.76895	4.24788	32.8952	1.30004e-06	0.000899582	18	4	Down-regulated
Sus_scrofa___ARHGEF3	-1.74104	8.46201	33.4292	1.51447e-06	0.00101416	18	4	Down-regulated
Sus_scrofa___RORA	-1.38656	10.4955	33.0532	1.65231e-06	0.00107188	18	4	Down-regulated
Sus_scrofa___ESR1	-2.40799	5.32535	29.9359	1.7247e-06	0.00108494	18	4	Down-regulated
Sus_scrofa___DACH2	-2.85989	5.09718	28.8708	1.933e-06	0.00118021	18	4	Down-regulated
Sus_scrofa___CDC25B	-1.99663	5.88971	31.1282	2.00635e-06	0.00118999	18	4	Down-regulated
Sus_scrofa___SLC9B1	-1.66889	7.38144	31.9342	2.26902e-06	0.0013084	18	4	Down-regulated
Sus_scrofa___ENSSSCG00000042147	-2.64615	5.68077	28.7616	2.93889e-06	0.00164887	18	4	Down-regulated
Sus_scrofa___CKM	-3.61799	4.78872	27.2505	3.12631e-06	0.00170787	18	4	Down-regulated
Sus_scrofa___DOC2B	-2.23835	4.92627	27.3304	3.31051e-06	0.00176213	18	4	Down-regulated
Sus_scrofa___PARD6G	-1.83777	9.61164	30.2875	3.49308e-06	0.00181282	18	4	Down-regulated
Sus_scrofa___KLHL4	-2.08675	7.55317	29.8063	4.05312e-06	0.00195671	18	4	Down-regulated
Sus_scrofa___POLR1D	-1.38447	6.60092	29.1423	4.68892e-06	0.00221221	18	4	Down-regulated
Sus_scrofa___MYLIP	-1.68572	6.89277	29.0115	4.95578e-06	0.00228616	18	4	Down-regulated
Sus_scrofa___ISYNA1	-2.38317	4.88592	25.4428	6.12781e-06	0.00276537	18	4	Down-regulated
Sus_scrofa___HS3ST1	-2.21116	7.22981	28.1892	6.29717e-06	0.00277134	18	4	Down-regulated
Sus_scrofa___SPC24	-2.73049	5.12842	25.2642	6.66877e-06	0.00277134	18	4	Down-regulated
Sus_scrofa___EPB42	-2.23125	5.56411	26.2145	6.93348e-06	0.00277134	18	4	Down-regulated
Sus_scrofa___FARP2	-1.55198	6.97986	27.7509	7.15982e-06	0.00277134	18	4	Down-regulated
Sus_scrofa___KIFC2	-3.51501	4.17628	26.547	8.07165e-06	0.00303139	18	4	Down-regulated
Sus_scrofa___NOX5	-3.94287	4.07985	29.9076	8.24597e-06	0.00303139	18	4	Down-regulated
Sus_scrofa___RAB3IL1	-1.67538	5.6197	26.0726	8.46961e-06	0.00303139	18	4	Down-regulated
Sus_scrofa___PCSK6	-1.46055	7.85966	26.903	9.24736e-06	0.00314698	18	4	Down-regulated
Sus_scrofa___MYL2	-2.79656	6.61694	26.2529	9.43149e-06	0.0031513	18	4	Down-regulated
Sus_scrofa___SPARCL1	-1.4145	6.92679	26.5764	1.00703e-05	0.00326638	18	4	Down-regulated
Sus_scrofa___ETS1	-1.13242	9.30791	26.348	1.07438e-05	0.00333283	18	4	Down-regulated
Sus_scrofa___ND2	-2.20358	6.01566	25.5088	1.09173e-05	0.00333283	18	4	Down-regulated
Sus_scrofa___MAP3K1	-1.68023	9.26641	26.1937	1.12545e-05	0.00338596	18	4	Down-regulated
Sus_scrofa___ZNF704	-1.76605	7.7507	26.124	1.16394e-05	0.00341104	18	4	Down-regulated
Sus_scrofa___MAGI2	-1.63042	9.56996	25.7129	1.29668e-05	0.00373859	18	4	Down-regulated
Sus_scrofa___CACNB4	-2.83357	4.80125	23.103	1.33844e-05	0.00380612	18	4	Down-regulated
Sus_scrofa___CYTB	-2.35416	6.52759	24.6814	1.60819e-05	0.00445125	18	4	Down-regulated
Sus_scrofa___RUNDC3B	-2.17626	5.56032	23.5483	1.64962e-05	0.00450584	18	4	Down-regulated
Sus_scrofa___ND4	-2.03133	6.21686	23.9603	1.94205e-05	0.00510317	18	4	Down-regulated
Sus_scrofa___ENSSSCG00000028572	-1.6418	6.27412	23.9846	2.02579e-05	0.00525668	18	4	Down-regulated
Sus_scrofa___TNNC1	-2.92457	5.74844	22.4209	2.17527e-05	0.00557	18	4	Down-regulated
Sus_scrofa___TNNT2	-2.87759	5.92261	22.6401	2.2002e-05	0.00557	18	4	Down-regulated
Sus_scrofa___TNS3	-1.81948	6.73635	23.8069	2.26439e-05	0.005596	18	4	Down-regulated
Sus_scrofa___ANKRD55	-2.30304	9.19739	23.8266	2.3038e-05	0.00562641	18	4	Down-regulated
Sus_scrofa___HDAC9	-1.47591	9.87905	23.6829	2.40023e-05	0.00579376	18	4	Down-regulated
Sus_scrofa___BMERB1	-1.64859	5.61951	22.6925	2.50532e-05	0.00584359	18	4	Down-regulated
Sus_scrofa___MCF2L	-1.8708	5.8266	22.6575	2.66379e-05	0.00614417	18	4	Down-regulated
Sus_scrofa___ENO3	-3.2073	4.46296	21.2153	2.74377e-05	0.00625911	18	4	Down-regulated
Sus_scrofa___ENSSSCG00000016898	-2.06882	5.12858	21.4275	2.8569e-05	0.00644634	18	4	Down-regulated
Sus_scrofa___SLC35F3	-2.41866	4.52103	20.8467	3.02433e-05	0.00659586	18	4	Down-regulated
Sus_scrofa___PRKAG2	-1.52165	9.24891	22.9183	3.05025e-05	0.00659586	18	4	Down-regulated
Sus_scrofa___CHST9	-1.9403	7.64088	22.9021	3.09995e-05	0.0066342	18	4	Down-regulated
Sus_scrofa___ENSSSCG00000035525	-1.91004	4.87934	20.9481	3.17213e-05	0.00671941	18	4	Down-regulated
Sus_scrofa___MAN1A1	-1.27946	8.62085	22.6544	3.32303e-05	0.00689828	18	4	Down-regulated
Sus_scrofa___RASGRP2	-2.64547	4.38385	20.528	3.41158e-05	0.00701197	18	4	Down-regulated
Sus_scrofa___CDHR3	-2.77652	4.43014	20.35	3.65185e-05	0.00741234	18	4	Down-regulated
Sus_scrofa___SH3TC1	-1.58932	6.00623	21.9474	3.67778e-05	0.00741234	18	4	Down-regulated
Sus_scrofa___ENSSSCG00000022039	-1.77624	5.33001	21.012	3.81937e-05	0.00755107	18	4	Down-regulated
Sus_scrofa___ABCA8	-2.19304	6.79293	21.9844	3.97682e-05	0.0077882	18	4	Down-regulated
Sus_scrofa___DLG2	-1.76116	7.22809	21.9367	4.19051e-05	0.00810223	18	4	Down-regulated
Sus_scrofa___DNAH5	-2.08462	5.4028	20.6376	4.29669e-05	0.00818303	18	4	Down-regulated
Sus_scrofa___RCBTB2	-1.24007	7.63633	21.4419	4.92744e-05	0.00911004	18	4	Down-regulated
Sus_scrofa___DENND4A	-1.36621	8.88327	21.3748	4.99181e-05	0.00911004	18	4	Down-regulated
Sus_scrofa___ENSSSCG00000024860	-1.80636	5.32994	20.2389	5.00286e-05	0.00911004	18	4	Down-regulated
Sus_scrofa___ENSSSCG00000033927	-3.11428	4.5879	19.4588	5.11698e-05	0.00923681	18	4	Down-regulated
Sus_scrofa___HPSE2	-2.68426	6.88904	21.0424	5.25211e-05	0.00939902	18	4	Down-regulated
Sus_scrofa___ANO4	-2.27243	6.51928	20.2234	6.77554e-05	0.0118196	18	4	Down-regulated
Sus_scrofa___ND1	-2.00556	6.08403	19.9361	7.0318e-05	0.0121644	18	4	Down-regulated
Sus_scrofa___ENSSSCG00000035651	-2.49767	4.16842	18.6416	7.38092e-05	0.0126628	18	4	Down-regulated
Sus_scrofa___SEMA6A	-1.70574	10.3802	19.9478	7.94651e-05	0.0133502	18	4	Down-regulated
Sus_scrofa___ITPR1	-1.26679	9.51221	19.9394	7.9745e-05	0.0133502	18	4	Down-regulated
Sus_scrofa___NMNAT2	-1.5775	6.5749	19.2949	9.67599e-05	0.0158444	18	4	Down-regulated
Sus_scrofa___RALGPS2	-1.54822	6.9771	19.1889	0.000102764	0.016537	18	4	Down-regulated
Sus_scrofa___RTN4R	-2.26547	4.51277	17.6282	0.000104038	0.0166133	18	4	Down-regulated
Sus_scrofa___NDUFA4	-2.41745	5.4872	17.987	0.000107792	0.0169519	18	4	Down-regulated
Sus_scrofa___COX5B	-2.28111	5.05014	17.5695	0.000113104	0.01753	18	4	Down-regulated
Sus_scrofa___KIRREL3	-2.14856	4.97047	17.3368	0.000123987	0.0184045	18	4	Down-regulated
Sus_scrofa___TCEA2	-1.47153	6.77893	18.4148	0.000132826	0.0191425	18	4	Down-regulated
Sus_scrofa___TET1	-1.09663	7.45941	18.4358	0.000133709	0.0191425	18	4	Down-regulated
Sus_scrofa___ENSSSCG00000027790	-1.39031	7.31401	18.3628	0.000137015	0.0194815	18	4	Down-regulated
Sus_scrofa___ITIH5	-1.55646	7.0474	18.2221	0.000143137	0.0200769	18	4	Down-regulated
Sus_scrofa___ENSSSCG00000040056	-1.42079	6.01969	17.7667	0.000154504	0.0209631	18	4	Down-regulated
Sus_scrofa___DLGAP1	-1.49356	9.26224	17.8769	0.000160769	0.0215533	18	4	Down-regulated
Sus_scrofa___CELSR1	-1.51151	7.86024	17.8941	0.000160931	0.0215533	18	4	Down-regulated
Sus_scrofa___RTL4	-2.04931	4.57594	16.525	0.000162045	0.0215634	18	4	Down-regulated
Sus_scrofa___ADAMTSL3	-1.73691	6.94265	17.7901	0.000165399	0.0216831	18	4	Down-regulated
Sus_scrofa___STAP1	-1.55347	5.96875	17.4953	0.000167112	0.0216831	18	4	Down-regulated
Sus_scrofa___GAS2	-1.49841	4.94615	16.6856	0.000168324	0.0216831	18	4	Down-regulated
Sus_scrofa___BCR	-1.14902	7.20357	17.7518	0.000169158	0.0216831	18	4	Down-regulated
Sus_scrofa___TC2N	-1.4669	7.32484	17.5147	0.000183723	0.0233981	18	4	Down-regulated
Sus_scrofa___KCNG2	-3.6216	4.24009	16.9582	0.000194473	0.024174	18	4	Down-regulated
Sus_scrofa___FOXP1	-0.939007	10.9094	17.2131	0.000202458	0.0249816	18	4	Down-regulated
Sus_scrofa___CATSPERG	-1.55444	5.69493	16.7749	0.000204325	0.0249816	18	4	Down-regulated
Sus_scrofa___REEP1	-1.81527	7.94411	17.1771	0.000206711	0.0249816	18	4	Down-regulated
Sus_scrofa___OSBPL6	-1.73285	9.82466	17.1521	0.000206987	0.0249816	18	4	Down-regulated
Sus_scrofa___RFTN2	-1.2748	7.54908	17.1579	0.000208285	0.024993	18	4	Down-regulated
Sus_scrofa___RADIL	-1.47671	7.47014	17.1035	0.000212309	0.0250463	18	4	Down-regulated
Sus_scrofa___CPT1C	-1.85518	4.78607	15.861	0.000218029	0.0254273	18	4	Down-regulated
Sus_scrofa___ENSSSCG00000027349	-1.67578	5.66846	16.512	0.000222225	0.0257719	18	4	Down-regulated
Sus_scrofa___SLC4A11	-2.48935	4.20152	15.7522	0.000224876	0.0257912	18	4	Down-regulated
Sus_scrofa___STOX2	-1.43018	9.96269	16.874	0.000228319	0.0260422	18	4	Down-regulated
Sus_scrofa___PIK3CB	-0.999864	7.96402	16.8266	0.000233558	0.0263501	18	4	Down-regulated
Sus_scrofa___CEP85L	-1.01801	8.73814	16.5003	0.000261319	0.0288548	18	4	Down-regulated
Sus_scrofa___QSOX1	-1.26862	6.63371	16.3546	0.000273008	0.0298283	18	4	Down-regulated
Sus_scrofa___SYT1	-1.62394	5.86233	15.9703	0.000285706	0.03038	18	4	Down-regulated
Sus_scrofa___SPOCK3	-1.38397	5.80052	15.9726	0.000285969	0.03038	18	4	Down-regulated
Sus_scrofa___KIF3B	-1.41921	6.10762	16.0833	0.000286838	0.03038	18	4	Down-regulated
Sus_scrofa___FRMD3	-1.42601	8.44209	15.7221	0.000346565	0.0347552	18	4	Down-regulated
Sus_scrofa___DOCK9	-1.0622	11.1136	15.6548	0.000353785	0.0351398	18	4	Down-regulated
Sus_scrofa___USP31	-1.06071	8.2878	15.642	0.000356866	0.035277	18	4	Down-regulated
Sus_scrofa___CORO1C	-1.08616	8.46348	15.6016	0.000361882	0.0356034	18	4	Down-regulated
Sus_scrofa___RIPOR2	-2.02354	5.60504	15.0405	0.000367104	0.0359468	18	4	Down-regulated
Sus_scrofa___ENSSSCG00000034846	-1.79182	4.80404	14.5732	0.000370976	0.0361553	18	4	Down-regulated
Sus_scrofa___MET	-1.87513	5.20388	14.7692	0.000375349	0.0362412	18	4	Down-regulated
Sus_scrofa___KLHL7	-1.21123	6.26311	15.3877	0.000379492	0.0364716	18	4	Down-regulated
Sus_scrofa___SPATS2	-0.963883	7.73648	15.4162	0.00038862	0.0371194	18	4	Down-regulated
Sus_scrofa___LRBA	-0.850759	8.71342	15.3392	0.000397897	0.0373753	18	4	Down-regulated
Sus_scrofa___TNRC6A	-0.890415	8.96392	15.3147	0.000401238	0.0374492	18	4	Down-regulated
Sus_scrofa___LRCH2	-1.36764	5.61916	14.9634	0.000402292	0.0374492	18	4	Down-regulated
Sus_scrofa___YTHDC2	-0.94971	7.26861	15.2224	0.000417692	0.0382934	18	4	Down-regulated
Sus_scrofa___ENSSSCG00000033570	-1.6994	4.98003	14.3932	0.000418739	0.0382934	18	4	Down-regulated
Sus_scrofa___GPM6A	-1.37426	9.75887	15.0732	0.000438162	0.0395084	18	4	Down-regulated
Sus_scrofa___LMO2	-1.4727	5.98362	14.8851	0.000440062	0.0395084	18	4	Down-regulated
Sus_scrofa___CSPP1	-0.874292	7.72197	14.9201	0.000466457	0.0408573	18	4	Down-regulated
Sus_scrofa___ENSSSCG00000034866	-2.78692	4.09268	14.3038	0.000471244	0.0408846	18	4	Down-regulated
Sus_scrofa___ARPP21	-2.69808	4.37501	13.8702	0.00048176	0.0413258	18	4	Down-regulated
Sus_scrofa___ENSSSCG00000014314	-2.27216	4.13509	13.8359	0.000498588	0.0424188	18	4	Down-regulated
Sus_scrofa___TTC21A	-1.93847	4.21232	13.6409	0.000522626	0.0439238	18	4	Down-regulated
Sus_scrofa___COX7C	-1.86772	5.15815	13.8955	0.000525147	0.0439578	18	4	Down-regulated
Sus_scrofa___NELFA	-1.21464	5.94434	14.405	0.000530551	0.0440735	18	4	Down-regulated
Sus_scrofa___ANKRD29	-1.98228	4.9421	13.7351	0.000530776	0.0440735	18	4	Down-regulated
Sus_scrofa___ARHGAP26	-1.2099	8.54312	14.5385	0.000535756	0.0443098	18	4	Down-regulated
Sus_scrofa___ATP5ME	-2.12399	5.0586	13.6628	0.000553523	0.0455975	18	4	Down-regulated
Sus_scrofa___KCNK5	-2.54916	4.13491	13.5846	0.000571193	0.0466229	18	4	Down-regulated
Sus_scrofa___ADCY1	-1.99538	6.16084	14.1916	0.000572707	0.0466229	18	4	Down-regulated
Sus_scrofa___ST6GAL1	-1.15745	7.21738	14.3122	0.000585423	0.0470825	18	4	Down-regulated
Sus_scrofa___ENSSSCG00000043817	-1.11393	8.68537	14.2811	0.000589694	0.0470825	18	4	Down-regulated
Sus_scrofa___BAIAP3	-1.96193	4.49141	13.36	0.000593872	0.0471304	18	4	Down-regulated
Sus_scrofa___BMF	-2.13802	4.30931	13.2529	0.000617911	0.0484046	18	4	Down-regulated
Sus_scrofa___ENSSSCG00000035789	-1.97376	9.26108	14.0884	0.000633719	0.0491907	18	4	Down-regulated
Sus_scrofa___ND6	-1.93159	4.78575	13.2567	0.000635056	0.0491907	18	4	Down-regulated

## Sheet: Fibroblasts
Gene	logFC	logCPM	F	PValue	FDR	Observations_Transplanted	Observations_Control	level
Sus_scrofa___hCD46	11.6114	7.62924	203.524	5.93822e-14	3.5178e-10	19	4	Up-regulated
Sus_scrofa___ENSSSCG00000038594	5.10871	5.86616	79.8079	2.56223e-10	3.10186e-07	19	4	Up-regulated
Sus_scrofa___ZNF146	1.93936	7.44901	86.8237	2.72277e-10	3.10186e-07	19	4	Up-regulated
Sus_scrofa___RCBTB1	2.37042	6.5703	77.9096	9.04759e-10	7.05236e-07	19	4	Up-regulated
Sus_scrofa___DZIP1L	3.54419	6.16031	70.2025	2.40979e-09	1.55169e-06	19	4	Up-regulated
Sus_scrofa___ENO1	4.64124	7.27007	64.8493	5.5669e-09	2.94449e-06	19	4	Up-regulated
Sus_scrofa___LIPG	5.05738	6.21814	59.4727	8.04897e-09	3.78429e-06	19	4	Up-regulated
Sus_scrofa___TEAD3	2.5392	6.40316	62.9787	8.41819e-09	3.80055e-06	19	4	Up-regulated
Sus_scrofa___ENSSSCG00000033700	2.97203	5.10863	61.2776	8.80327e-09	3.89183e-06	19	4	Up-regulated
Sus_scrofa___DIPK1A	3.09253	6.63766	58.8181	1.65952e-08	6.50961e-06	19	4	Up-regulated
Sus_scrofa___PINX1	1.88934	6.39909	55.7451	2.85612e-08	9.61343e-06	19	4	Up-regulated
Sus_scrofa___MINPP1	3.91982	5.34817	51.887	3.6817e-08	1.12425e-05	19	4	Up-regulated
Sus_scrofa___ENSSSCG00000004983	2.50767	5.47503	52.7865	4.6078e-08	1.33807e-05	19	4	Up-regulated
Sus_scrofa___MRPS30	3.26539	5.43122	51.7483	4.8497e-08	1.37893e-05	19	4	Up-regulated
Sus_scrofa___PRRG1	3.08895	6.01662	50.7696	6.66859e-08	1.748e-05	19	4	Up-regulated
Sus_scrofa___ACVR1B	3.23884	6.24528	49.5637	8.4387e-08	2.14252e-05	19	4	Up-regulated
Sus_scrofa___ALDH3A2	1.53568	7.21008	49.5938	8.7051e-08	2.18513e-05	19	4	Up-regulated
Sus_scrofa___TNC	5.13264	9.20305	49.4474	9.00945e-08	2.22623e-05	19	4	Up-regulated
Sus_scrofa___PKDCC	3.71866	7.95116	49.444	9.01917e-08	2.22623e-05	19	4	Up-regulated
Sus_scrofa___PABPC4	3.56134	4.988	46.8926	9.9594e-08	2.35998e-05	19	4	Up-regulated
Sus_scrofa___TIMMDC1	1.54874	6.1942	48.8677	1.00813e-07	2.3699e-05	19	4	Up-regulated
Sus_scrofa___LMNA	2.13688	6.44052	48.5054	1.0809e-07	2.50127e-05	19	4	Up-regulated
Sus_scrofa___FAM98A	2.86627	5.28933	47.2159	1.23184e-07	2.78527e-05	19	4	Up-regulated
Sus_scrofa___TAF4B	2.79418	6.19087	47.0267	1.41723e-07	3.04191e-05	19	4	Up-regulated
Sus_scrofa___SPATA5	2.45916	8.51059	46.3124	1.64267e-07	3.40251e-05	19	4	Up-regulated
Sus_scrofa___UCK2	4.14856	6.27501	45.3646	1.6846e-07	3.44123e-05	19	4	Up-regulated
Sus_scrofa___SNX3	1.6997	5.8027	45.6408	1.89995e-07	3.72693e-05	19	4	Up-regulated
Sus_scrofa___ENSSSCG00000009072	2.29127	5.61504	45.4279	1.94348e-07	3.76107e-05	19	4	Up-regulated
Sus_scrofa___TOMM70	2.0087	5.94724	45.4849	1.95545e-07	3.76107e-05	19	4	Up-regulated
Sus_scrofa___PDLIM7	3.43302	7.16913	44.1035	2.57272e-07	4.67509e-05	19	4	Up-regulated
Sus_scrofa___DPH5	2.84572	4.98022	42.4847	3.07076e-07	5.25757e-05	19	4	Up-regulated
Sus_scrofa___CTSH	1.80945	7.32455	43.1008	3.1575e-07	5.34429e-05	19	4	Up-regulated
Sus_scrofa___GBF1	1.3031	8.38128	42.8907	3.28849e-07	5.4722e-05	19	4	Up-regulated
Sus_scrofa___CTPS1	5.7558	5.52463	40.6528	3.57007e-07	5.77844e-05	19	4	Up-regulated
Sus_scrofa___HK1	2.08185	7.56875	42.2372	3.78049e-07	6.05287e-05	19	4	Up-regulated
Sus_scrofa___NAA25	2.04002	6.94358	42.1356	3.87537e-07	6.13842e-05	19	4	Up-regulated
Sus_scrofa___SLC20A1	2.48202	6.54472	41.3666	4.5711e-07	7.12611e-05	19	4	Up-regulated
Sus_scrofa___PSMD1	1.96488	7.24006	41.1035	4.81149e-07	7.46159e-05	19	4	Up-regulated
Sus_scrofa___VMP1	2.26536	9.02432	40.5395	5.40942e-07	8.25912e-05	19	4	Up-regulated
Sus_scrofa___CES1	6.9836	3.21528	42.8027	5.8062e-07	8.68583e-05	19	4	Up-regulated
Sus_scrofa___URGCP	2.03932	5.62725	40.0417	6.04454e-07	8.99695e-05	19	4	Up-regulated
Sus_scrofa___XPO5	1.66346	5.79112	39.94	6.22658e-07	9.21714e-05	19	4	Up-regulated
Sus_scrofa___ENSSSCG00000032999	3.78618	3.64143	38.1257	6.64423e-07	9.64716e-05	19	4	Up-regulated
Sus_scrofa___PLXNA4	2.37569	10.0932	39.4442	6.85892e-07	9.9103e-05	19	4	Up-regulated
Sus_scrofa___PTP4A2	2.03155	7.09754	39.3688	7.00821e-07	0.000100769	19	4	Up-regulated
Sus_scrofa___ENSSSCG00000035544	2.12719	6.40855	39.2959	7.15081e-07	0.00010183	19	4	Up-regulated
Sus_scrofa___MAP3K20	1.19613	8.85013	38.7996	7.90426e-07	0.000108997	19	4	Up-regulated
Sus_scrofa___MUL1	2.19449	4.24743	38.1254	7.91168e-07	0.000108997	19	4	Up-regulated
Sus_scrofa___OLA1	2.2019	7.42373	38.7749	7.97845e-07	0.000109408	19	4	Up-regulated
Sus_scrofa___ERCC6	2.04192	5.04561	38.5254	8.21542e-07	0.000111115	19	4	Up-regulated
Sus_scrofa___RPL31	1.61173	8.50171	38.5574	8.34158e-07	0.0001118	19	4	Up-regulated
Sus_scrofa___EIF3J	1.61922	5.6912	38.241	9.04694e-07	0.00011963	19	4	Up-regulated
Sus_scrofa___TFB2M	3.52143	4.03579	36.2933	9.19098e-07	0.000120994	19	4	Up-regulated
Sus_scrofa___HSPA4	1.49991	6.61114	37.9818	9.53141e-07	0.000123284	19	4	Up-regulated
Sus_scrofa___METAP1	2.64929	5.5401	37.7009	9.77467e-07	0.000125336	19	4	Up-regulated
Sus_scrofa___NLK	2.23702	6.90372	37.6181	1.03581e-06	0.000131677	19	4	Up-regulated
Sus_scrofa___DERL1	2.41912	5.61025	37.0797	1.1483e-06	0.000141338	19	4	Up-regulated
Sus_scrofa___GPHN	1.01351	9.60008	37.0761	1.1626e-06	0.000142299	19	4	Up-regulated
Sus_scrofa___PGRMC1	2.94326	4.83028	36.0875	1.22178e-06	0.000148317	19	4	Up-regulated
Sus_scrofa___PTPA	2.12444	5.33615	36.4449	1.33007e-06	0.000158857	19	4	Up-regulated
Sus_scrofa___FBXO4	2.07794	5.2663	35.9466	1.49083e-06	0.000175929	19	4	Up-regulated
Sus_scrofa___GNL3	2.30689	5.48485	35.7431	1.55953e-06	0.000182582	19	4	Up-regulated
Sus_scrofa___LRP12	2.62977	6.4088	35.7731	1.57569e-06	0.000183747	19	4	Up-regulated
Sus_scrofa___OSMR	1.52676	7.68135	35.5561	1.65024e-06	0.000190194	19	4	Up-regulated
Sus_scrofa___NSUN3	3.08963	5.99543	35.4018	1.65863e-06	0.000190422	19	4	Up-regulated
Sus_scrofa___HSPA5	3.3463	5.57718	34.9409	1.71004e-06	0.000194813	19	4	Up-regulated
Sus_scrofa___METAP1D	2.76155	5.20792	35.0528	1.72174e-06	0.000195217	19	4	Up-regulated
Sus_scrofa___VDAC1	1.73753	5.81606	35.3978	1.72676e-06	0.000195217	19	4	Up-regulated
Sus_scrofa___TMEM161B	1.88711	6.23173	35.3755	1.73404e-06	0.000195293	19	4	Up-regulated
Sus_scrofa___ENSSSCG00000000908	1.34604	5.98282	35.3114	1.76051e-06	0.000195305	19	4	Up-regulated
Sus_scrofa___VWA8	1.57873	6.76605	35.2268	1.7878e-06	0.000196857	19	4	Up-regulated
Sus_scrofa___PSMC1	1.75874	4.99229	35.1662	1.7954e-06	0.000196962	19	4	Up-regulated
Sus_scrofa___TXNDC11	1.40324	7.05768	34.8879	1.93175e-06	0.000207314	19	4	Up-regulated
Sus_scrofa___TBRG4	2.32351	5.00763	34.6184	1.96059e-06	0.000209362	19	4	Up-regulated
Sus_scrofa___CCDC91	1.64015	7.59294	34.6775	2.02775e-06	0.000214507	19	4	Up-regulated
Sus_scrofa___ENSSSCG00000016191	3.90674	3.3526	33.6158	2.07496e-06	0.000217677	19	4	Up-regulated
Sus_scrofa___TMEM165	1.86686	5.59299	34.1752	2.2952e-06	0.000237705	19	4	Up-regulated
Sus_scrofa___RHOD	3.6186	4.75941	32.6271	2.41204e-06	0.000247213	19	4	Up-regulated
Sus_scrofa___PYM1	2.93558	4.04471	32.5543	2.44285e-06	0.000249507	19	4	Up-regulated
Sus_scrofa___METTL16	1.43643	6.43484	33.8869	2.45645e-06	0.000250034	19	4	Up-regulated
Sus_scrofa___ACVR2A	1.45954	7.6637	33.7864	2.50473e-06	0.000253209	19	4	Up-regulated
Sus_scrofa___NANS	1.27711	6.51682	33.6858	2.57458e-06	0.000257632	19	4	Up-regulated
Sus_scrofa___ENSSSCG00000032067	3.04922	4.52667	32.4876	2.69596e-06	0.000266181	19	4	Up-regulated
Sus_scrofa___FEM1B	3.96735	2.9362	32.3878	2.91857e-06	0.00028159	19	4	Up-regulated
Sus_scrofa___CARNMT1	2.81482	4.63908	32.4012	2.96409e-06	0.000284573	19	4	Up-regulated
Sus_scrofa___CCDC58	3.57133	4.11356	31.6353	2.96871e-06	0.000284573	19	4	Up-regulated
Sus_scrofa___ENSSSCG00000010968	2.48896	5.5801	32.8476	3.09075e-06	0.000293423	19	4	Up-regulated
Sus_scrofa___CCL2	2.80889	7.93724	32.8196	3.17034e-06	0.000300017	19	4	Up-regulated
Sus_scrofa___CMSS1	1.81299	9.27803	32.7581	3.20729e-06	0.000302548	19	4	Up-regulated
Sus_scrofa___C18orf25	1.78907	6.53679	32.7677	3.21927e-06	0.000302713	19	4	Up-regulated
Sus_scrofa___TMEM38B	4.01104	4.6194	31.2098	3.28559e-06	0.000304353	19	4	Up-regulated
Sus_scrofa___MRS2	3.42312	4.48103	31.3663	3.29835e-06	0.000304353	19	4	Up-regulated
Sus_scrofa___MRPL35	3.45545	3.62017	31.4046	3.3166e-06	0.000305086	19	4	Up-regulated
Sus_scrofa___ZNF654	1.91202	7.36488	32.5801	3.3578e-06	0.00030697	19	4	Up-regulated
Sus_scrofa___BCL3	3.02723	4.53484	31.2578	3.70041e-06	0.000331136	19	4	Up-regulated
Sus_scrofa___TSC22D2	2.79582	6.74751	32.0341	3.85198e-06	0.00033957	19	4	Up-regulated
Sus_scrofa___ENSSSCG00000003253	2.17934	6.5072	31.994	3.89497e-06	0.000342341	19	4	Up-regulated
Sus_scrofa___KPNA3	1.62934	6.53829	31.8898	3.98919e-06	0.000348554	19	4	Up-regulated
Sus_scrofa___PDSS2	1.61623	6.11379	31.5129	4.38981e-06	0.000372568	19	4	Up-regulated
Sus_scrofa___KDM4C	1.06432	8.05137	31.4246	4.45471e-06	0.000375922	19	4	Up-regulated
Sus_scrofa___STT3B	1.34907	7.57757	31.2826	4.61789e-06	0.000383143	19	4	Up-regulated
Sus_scrofa___FARSA	2.6716	4.32138	30.2743	4.93129e-06	0.000402383	19	4	Up-regulated
Sus_scrofa___REEP3	1.17607	8.7991	30.7032	5.3361e-06	0.000425708	19	4	Up-regulated
Sus_scrofa___TTC27	2.24068	6.69853	30.7192	5.34779e-06	0.000425708	19	4	Up-regulated
Sus_scrofa___BACH1	1.56177	7.18477	30.6842	5.37231e-06	0.000425708	19	4	Up-regulated
Sus_scrofa___ENSSSCG00000003077	3.14095	3.47254	29.4444	5.46077e-06	0.00042904	19	4	Up-regulated
Sus_scrofa___ENSSSCG00000023850	3.23771	5.28178	30.146	5.47995e-06	0.000429408	19	4	Up-regulated
Sus_scrofa___MRPS35	1.84548	5.38064	30.5792	5.52115e-06	0.000431494	19	4	Up-regulated
Sus_scrofa___PDHX	1.72786	5.53921	30.4733	5.69501e-06	0.000438701	19	4	Up-regulated
Sus_scrofa___CRLS1	1.91207	5.31892	30.4399	5.70285e-06	0.000438701	19	4	Up-regulated
Sus_scrofa___DNAJC24	1.98835	5.3504	30.4315	5.70357e-06	0.000438701	19	4	Up-regulated
Sus_scrofa___ENSSSCG00000041731	1.95159	6.0727	30.459	5.71703e-06	0.000438701	19	4	Up-regulated
Sus_scrofa___VEZT	1.24298	6.5446	30.3941	5.79053e-06	0.00044205	19	4	Up-regulated
Sus_scrofa___UBE3D	1.77292	6.16558	30.2545	6.02098e-06	0.00045515	19	4	Up-regulated
Sus_scrofa___PRKAR2A	1.3019	7.68645	30.1934	6.07536e-06	0.000457893	19	4	Up-regulated
Sus_scrofa___MRPS27	1.60744	6.78302	30.1579	6.14855e-06	0.000461063	19	4	Up-regulated
Sus_scrofa___CCN1	4.25352	6.75965	29.8802	6.22265e-06	0.000464269	19	4	Up-regulated
Sus_scrofa___HSD17B12	1.51967	6.47691	30.0546	6.32037e-06	0.000470376	19	4	Up-regulated
Sus_scrofa___BCL2L13	1.43217	6.42558	29.8974	6.57881e-06	0.000484413	19	4	Up-regulated
Sus_scrofa___HK2	7.44466	6.26504	29.1296	6.77873e-06	0.000494547	19	4	Up-regulated
Sus_scrofa___COA7	4.35857	3.77355	28.9629	6.88773e-06	0.000499003	19	4	Up-regulated
Sus_scrofa___QRSL1	3.36439	3.42954	28.7004	6.89035e-06	0.000499003	19	4	Up-regulated
Sus_scrofa___LPCAT3	2.21184	4.8088	29.4982	6.94014e-06	0.000500163	19	4	Up-regulated
Sus_scrofa___PUS7	1.2693	7.35012	29.5721	7.12499e-06	0.000510406	19	4	Up-regulated
Sus_scrofa___WDR89	1.81694	5.01879	29.2652	7.65733e-06	0.000542608	19	4	Up-regulated
Sus_scrofa___FGFR2	3.31758	7.37319	29.0436	8.20313e-06	0.000570368	19	4	Up-regulated
Sus_scrofa___NUFIP2	1.15151	7.91766	28.9709	8.31758e-06	0.000572946	19	4	Up-regulated
Sus_scrofa___ABCB7	1.32416	6.74514	28.9261	8.43557e-06	0.000579725	19	4	Up-regulated
Sus_scrofa___ENSSSCG00000013696	1.71671	5.07549	28.9006	8.46416e-06	0.000579897	19	4	Up-regulated
Sus_scrofa___IL4R	3.10701	7.29188	28.9181	8.47723e-06	0.000579897	19	4	Up-regulated
Sus_scrofa___UBXN4	1.13212	6.90391	28.8797	8.52991e-06	0.00058135	19	4	Up-regulated
Sus_scrofa___INTS13	3.23845	4.32561	27.846	8.57698e-06	0.00058135	19	4	Up-regulated
Sus_scrofa___ENSSSCG00000005241	2.36188	4.01791	28.161	8.65201e-06	0.000583764	19	4	Up-regulated
Sus_scrofa___SERPINE1	5.89653	8.78244	28.6938	8.73342e-06	0.000586397	19	4	Up-regulated
Sus_scrofa___NFIL3	4.36174	5.63791	27.8064	8.90489e-06	0.00059406	19	4	Up-regulated
Sus_scrofa___TMX2	2.23658	4.67854	28.4686	8.95747e-06	0.000596226	19	4	Up-regulated
Sus_scrofa___CRLF1	9.39722	5.45156	29.9756	9.09138e-06	0.000601087	19	4	Up-regulated
Sus_scrofa___ATP13A3	2.84831	7.62596	28.4841	9.48126e-06	0.000624077	19	4	Up-regulated
Sus_scrofa___BTBD1	1.7175	6.08517	28.4852	9.50464e-06	0.00062423	19	4	Up-regulated
Sus_scrofa___IER3	6.52734	5.32574	27.7333	9.96393e-06	0.000651504	19	4	Up-regulated
Sus_scrofa___QTRT1	2.24555	5.34672	28.206	1.00427e-05	0.000653769	19	4	Up-regulated
Sus_scrofa___SMARCD3	2.26383	4.90811	28.0288	1.02522e-05	0.000663032	19	4	Up-regulated
Sus_scrofa___TOPAZ1	1.79091	6.92371	28.1539	1.03335e-05	0.000663946	19	4	Up-regulated
Sus_scrofa___SERPINH1	1.74352	6.27146	28.1174	1.04625e-05	0.000669327	19	4	Up-regulated
Sus_scrofa___SLC25A33	4.56292	3.9331	27.4173	1.05068e-05	0.000670316	19	4	Up-regulated
Sus_scrofa___PIM3	3.82823	4.99324	27.1381	1.05235e-05	0.000670316	19	4	Up-regulated
Sus_scrofa___TEAD4	2.50846	5.63667	28.0228	1.05458e-05	0.000670316	19	4	Up-regulated
Sus_scrofa___ZNF793	2.0127	5.16298	27.8858	1.09648e-05	0.000691019	19	4	Up-regulated
Sus_scrofa___PAK4	2.11104	4.41299	27.6074	1.11296e-05	0.00069843	19	4	Up-regulated
Sus_scrofa___MRPL15	2.78009	3.68556	26.8066	1.12343e-05	0.000702028	19	4	Up-regulated
Sus_scrofa___MYNN	0.960954	5.52938	27.746	1.15775e-05	0.00071892	19	4	Up-regulated
Sus_scrofa___CANX	1.28765	6.73888	27.6343	1.18509e-05	0.000731629	19	4	Up-regulated
Sus_scrofa___PIAS2	1.20117	6.81953	27.5201	1.22116e-05	0.000751014	19	4	Up-regulated
Sus_scrofa___NOP58	1.13524	7.23727	27.5132	1.22211e-05	0.000751014	19	4	Up-regulated
Sus_scrofa___ECD	1.56569	5.18642	27.5169	1.22625e-05	0.000752001	19	4	Up-regulated
Sus_scrofa___MTX2	1.36808	5.97979	27.5074	1.23078e-05	0.000752516	19	4	Up-regulated
Sus_scrofa___UQCC1	1.69959	5.97549	27.4673	1.24445e-05	0.000756894	19	4	Up-regulated
Sus_scrofa___SETDB2	2.18152	4.7881	27.1496	1.29524e-05	0.000781308	19	4	Up-regulated
Sus_scrofa___LPGAT1	1.54634	6.24853	27.2928	1.30218e-05	0.000781308	19	4	Up-regulated
Sus_scrofa___NAMPT	2.25375	6.45925	27.2912	1.30319e-05	0.000781308	19	4	Up-regulated
Sus_scrofa___FLVCR1	1.81837	5.05559	27.2393	1.30865e-05	0.000781308	19	4	Up-regulated
Sus_scrofa___SLC39A14	2.08035	9.29996	27.2163	1.32201e-05	0.000786305	19	4	Up-regulated
Sus_scrofa___ENSSSCG00000027270	3.5988	4.35765	26.1473	1.33857e-05	0.000791386	19	4	Up-regulated
Sus_scrofa___CS	2.47309	4.88151	26.9229	1.35352e-05	0.000797763	19	4	Up-regulated
Sus_scrofa___BHLHE40	3.85161	5.2786	26.3283	1.38321e-05	0.0008097	19	4	Up-regulated
Sus_scrofa___TRAK2	2.47827	4.97627	26.8053	1.40675e-05	0.000821854	19	4	Up-regulated
Sus_scrofa___IDE	1.26669	6.75841	26.9698	1.41596e-05	0.000824237	19	4	Up-regulated
Sus_scrofa___STAT3	1.08466	8.85132	26.8393	1.46331e-05	0.000848203	19	4	Up-regulated
Sus_scrofa___MYC	2.92798	4.85704	26.3966	1.47197e-05	0.000851558	19	4	Up-regulated
Sus_scrofa___ENSSSCG00000035570	1.80353	6.47929	26.78	1.49443e-05	0.00086039	19	4	Up-regulated
Sus_scrofa___SLC4A1AP	1.40706	6.0197	26.7083	1.52549e-05	0.00087552	19	4	Up-regulated
Sus_scrofa___PANK2	2.12839	5.26955	26.6483	1.52817e-05	0.00087552	19	4	Up-regulated
Sus_scrofa___ASNS	2.31164	5.86732	26.6578	1.53848e-05	0.00087912	19	4	Up-regulated
Sus_scrofa___TUSC3	3.60483	5.97787	26.3957	1.554e-05	0.000885183	19	4	Up-regulated
Sus_scrofa___LUZP1	1.36893	7.70246	26.5383	1.58872e-05	0.000903132	19	4	Up-regulated
Sus_scrofa___BAG3	2.98716	5.30528	26.2466	1.6108e-05	0.000908798	19	4	Up-regulated
Sus_scrofa___POP1	2.34242	4.60397	26.165	1.64344e-05	0.000918464	19	4	Up-regulated
Sus_scrofa___YAP1	1.80234	8.39448	26.2448	1.72062e-05	0.000947301	19	4	Up-regulated
Sus_scrofa___PDIA3	0.944329	6.71506	26.241	1.72502e-05	0.000947964	19	4	Up-regulated
Sus_scrofa___ENSSSCG00000011290	3.57213	3.87118	25.2608	1.76539e-05	0.000965079	19	4	Up-regulated
Sus_scrofa___CSKMT	6.27324	2.59064	26.8902	1.80205e-05	0.000981265	19	4	Up-regulated
Sus_scrofa___DNAJC1	1.22541	8.62311	26.0746	1.80238e-05	0.000981265	19	4	Up-regulated
Sus_scrofa___C7H6orf125	2.16606	4.32613	25.7784	1.80881e-05	0.000981265	19	4	Up-regulated
Sus_scrofa___ENSSSCG00000038009	2.82265	3.83079	25.0848	1.85643e-05	0.00100159	19	4	Up-regulated
Sus_scrofa___ENSSSCG00000014132	2.59288	4.28686	25.3826	1.8906e-05	0.00101633	19	4	Up-regulated
Sus_scrofa___CSTF2	1.82546	4.38385	25.6885	1.93035e-05	0.00103394	19	4	Up-regulated
Sus_scrofa___SMYD2	1.5305	5.05892	25.7497	1.97915e-05	0.00105436	19	4	Up-regulated
Sus_scrofa___EIF3I	1.58531	4.44595	25.6544	1.99143e-05	0.00105786	19	4	Up-regulated
Sus_scrofa___ENSSSCG00000011676	2.14959	5.86219	25.6866	2.01257e-05	0.00106451	19	4	Up-regulated
Sus_scrofa___P2RX4	2.71421	3.66197	24.7648	2.02835e-05	0.00106903	19	4	Up-regulated
Sus_scrofa___TYW3	2.35383	3.41859	24.7773	2.03606e-05	0.00107119	19	4	Up-regulated
Sus_scrofa___CARMIL1	1.2279	8.75933	25.6208	2.04245e-05	0.00107265	19	4	Up-regulated
Sus_scrofa___ENSSSCG00000002430	1.22134	6.62516	25.5927	2.0636e-05	0.00107991	19	4	Up-regulated
Sus_scrofa___CDH11	1.79678	9.57698	25.5636	2.07493e-05	0.00107991	19	4	Up-regulated
Sus_scrofa___TRIB3	5.05102	5.0887	24.6798	2.09694e-05	0.00108208	19	4	Up-regulated
Sus_scrofa___ERC1	1.95828	9.21625	25.517	2.10211e-05	0.00108286	19	4	Up-regulated
Sus_scrofa___SLC7A2	3.2446	4.91295	24.9717	2.12335e-05	0.00109001	19	4	Up-regulated
Sus_scrofa___PLCXD3	3.05276	7.06022	25.3861	2.1896e-05	0.00110788	19	4	Up-regulated
Sus_scrofa___R3HDM1	1.28868	7.65856	25.2989	2.23452e-05	0.00112562	19	4	Up-regulated
Sus_scrofa___SEC22B	1.10589	6.21527	25.172	2.32299e-05	0.00116228	19	4	Up-regulated
Sus_scrofa___FAM20C	2.67937	4.829	24.8527	2.33837e-05	0.001168	19	4	Up-regulated
Sus_scrofa___GADD45B	2.87438	5.49156	24.9674	2.36245e-05	0.00117804	19	4	Up-regulated
Sus_scrofa___CHP1	1.83113	5.4566	25.0997	2.3689e-05	0.00117927	19	4	Up-regulated
Sus_scrofa___ZNF23	2.85022	3.30402	24.1291	2.44101e-05	0.00121314	19	4	Up-regulated
Sus_scrofa___CSRNP1	2.64513	4.49059	24.4697	2.50909e-05	0.00123865	19	4	Up-regulated
Sus_scrofa___C16orf72	1.34641	6.1444	24.8778	2.52486e-05	0.00124437	19	4	Up-regulated
Sus_scrofa___AKR1D1	1.80492	5.38776	24.8044	2.57262e-05	0.00126161	19	4	Up-regulated
Sus_scrofa___PSME4	1.51344	8.23137	24.7712	2.58967e-05	0.00126648	19	4	Up-regulated
Sus_scrofa___HIPK3	1.396	7.36431	24.7718	2.59111e-05	0.00126648	19	4	Up-regulated
Sus_scrofa___SMIM14	1.1107	7.95553	24.7516	2.60404e-05	0.00126916	19	4	Up-regulated
Sus_scrofa___DISP1	1.32299	9.53539	24.6599	2.67137e-05	0.00129503	19	4	Up-regulated
Sus_scrofa___ERH	1.92572	3.99995	24.3449	2.68708e-05	0.00129977	19	4	Up-regulated
Sus_scrofa___TRAP1	1.27157	5.35017	24.6	2.73949e-05	0.00131941	19	4	Up-regulated
Sus_scrofa___RPF2	1.58853	5.86492	24.5118	2.80332e-05	0.0013402	19	4	Up-regulated
Sus_scrofa___CERS4	2.20089	5.74757	24.4425	2.84442e-05	0.00135019	19	4	Up-regulated
Sus_scrofa___GOLT1B	1.43545	4.67891	24.4227	2.85667e-05	0.00135383	19	4	Up-regulated
Sus_scrofa___METTL21A	1.29644	6.30801	24.3895	2.89492e-05	0.00136541	19	4	Up-regulated
Sus_scrofa___PSMB2	1.25528	7.07088	24.3363	2.93142e-05	0.00137605	19	4	Up-regulated
Sus_scrofa___SMARCA4	1.38715	6.89379	24.2895	2.97265e-05	0.0013932	19	4	Up-regulated
Sus_scrofa___NFKBIZ	2.13405	8.29635	24.2411	3.00963e-05	0.0014083	19	4	Up-regulated
Sus_scrofa___ALS2	2.53619	5.24746	24.1328	3.01568e-05	0.0014089	19	4	Up-regulated
Sus_scrofa___RNF41	1.57289	5.24394	23.9998	3.23835e-05	0.00149672	19	4	Up-regulated
Sus_scrofa___ZNF131	1.42818	5.51988	23.9859	3.25803e-05	0.00150316	19	4	Up-regulated
Sus_scrofa___KDM8	1.83104	4.55817	23.8465	3.28332e-05	0.00150778	19	4	Up-regulated
Sus_scrofa___NBAS	1.18397	7.72595	23.8515	3.36337e-05	0.00153266	19	4	Up-regulated
Sus_scrofa___EMC2	2.84545	5.87092	23.6723	3.49465e-05	0.00158089	19	4	Up-regulated
Sus_scrofa___NRIP1	1.03118	7.92882	23.682	3.5306e-05	0.00159173	19	4	Up-regulated
Sus_scrofa___ENSSSCG00000030478	1.84014	5.06283	23.618	3.58068e-05	0.00160454	19	4	Up-regulated
Sus_scrofa___SLC41A2	1.73121	6.79745	23.595	3.62984e-05	0.00161678	19	4	Up-regulated
Sus_scrofa___ENSSSCG00000003989	1.78226	5.43008	23.5725	3.65557e-05	0.00162093	19	4	Up-regulated
Sus_scrofa___OTUD7B	0.971664	6.63267	23.5598	3.66284e-05	0.00162172	19	4	Up-regulated
Sus_scrofa___HSP90B1	1.7421	6.31087	23.5007	3.73671e-05	0.00164145	19	4	Up-regulated
Sus_scrofa___ACSL4	1.30958	8.83486	23.4808	3.74064e-05	0.00164145	19	4	Up-regulated
Sus_scrofa___TMEM70	2.54555	4.34883	23.0898	3.75598e-05	0.00164574	19	4	Up-regulated
Sus_scrofa___ACO1	1.95186	5.76136	23.4621	3.77703e-05	0.00165252	19	4	Up-regulated
Sus_scrofa___AEN	2.8622	3.8019	22.6778	3.79615e-05	0.00165342	19	4	Up-regulated
Sus_scrofa___PNPT1	1.46678	6.26094	23.4347	3.80699e-05	0.00165342	19	4	Up-regulated
Sus_scrofa___HYOU1	1.63372	4.76845	23.3855	3.82596e-05	0.00165438	19	4	Up-regulated
Sus_scrofa___SLC16A1	3.17015	5.05461	23.0397	3.84875e-05	0.00166181	19	4	Up-regulated
Sus_scrofa___NOLC1	1.77041	4.71137	23.3297	3.85844e-05	0.00166356	19	4	Up-regulated
Sus_scrofa___NMD3	2.09498	5.98	23.3542	3.89698e-05	0.00167531	19	4	Up-regulated
Sus_scrofa___SIAH2	2.39017	4.13196	22.9028	3.9357e-05	0.00168462	19	4	Up-regulated
Sus_scrofa___C1orf198	4.72479	5.48479	22.4924	3.94482e-05	0.00168609	19	4	Up-regulated
Sus_scrofa___MTCH2	2.55477	4.33836	22.8018	4.08528e-05	0.0017361	19	4	Up-regulated
Sus_scrofa___WDR37	1.49707	6.43743	23.1804	4.09533e-05	0.00173689	19	4	Up-regulated
Sus_scrofa___DCTPP1	1.91523	4.31268	22.9749	4.14532e-05	0.00175341	19	4	Up-regulated
Sus_scrofa___UTP18	1.71734	4.98859	23.1014	4.1671e-05	0.00175825	19	4	Up-regulated
Sus_scrofa___PMS1	2.05494	5.72007	23.0598	4.23859e-05	0.00178588	19	4	Up-regulated
Sus_scrofa___NAA50	1.4483	6.11258	23.021	4.295e-05	0.00179941	19	4	Up-regulated
Sus_scrofa___DTD2	2.09894	3.71837	22.5339	4.30758e-05	0.00180213	19	4	Up-regulated
Sus_scrofa___FSTL3	3.32565	4.59992	22.3634	4.34274e-05	0.00181427	19	4	Up-regulated
Sus_scrofa___DNAJC15	1.17829	5.52898	22.965	4.3759e-05	0.00182555	19	4	Up-regulated
Sus_scrofa___DNAJA3	1.40243	5.25346	22.9549	4.3868e-05	0.00182753	19	4	Up-regulated
Sus_scrofa___TMEM263	1.65948	5.36004	22.8776	4.47718e-05	0.00185734	19	4	Up-regulated
Sus_scrofa___ENSSSCG00000013862	1.4459	5.10863	22.8762	4.48381e-05	0.00185749	19	4	Up-regulated
Sus_scrofa___CCT3	1.2066	5.56456	22.8349	4.54439e-05	0.00187037	19	4	Up-regulated
Sus_scrofa___TTLL11	3.69223	4.2942	22.0276	4.57434e-05	0.00187922	19	4	Up-regulated
Sus_scrofa___DNAJC11	1.39225	6.04957	22.7971	4.5858e-05	0.00188028	19	4	Up-regulated
Sus_scrofa___MIPOL1	1.1825	7.21887	22.7805	4.58961e-05	0.00188028	19	4	Up-regulated
Sus_scrofa___MB21D2	1.11643	6.69812	22.7455	4.64141e-05	0.00189626	19	4	Up-regulated
Sus_scrofa___UBAP2	0.867143	7.78884	22.702	4.69369e-05	0.00191497	19	4	Up-regulated
Sus_scrofa___GBE1	2.08503	8.1263	22.6605	4.75291e-05	0.00192851	19	4	Up-regulated
Sus_scrofa___ENSSSCG00000003984	2.77732	3.7157	21.9115	4.81923e-05	0.00194742	19	4	Up-regulated
Sus_scrofa___CDC42EP3	5.61943	5.59623	21.919	4.83903e-05	0.00195275	19	4	Up-regulated
Sus_scrofa___NDUFAF5	2.34071	4.10754	22.2074	4.87252e-05	0.00195918	19	4	Up-regulated
Sus_scrofa___SINHCAF	1.25294	5.55489	22.5858	4.88859e-05	0.00195918	19	4	Up-regulated
Sus_scrofa___ADK	2.35277	7.21668	22.5689	4.89442e-05	0.00195918	19	4	Up-regulated
Sus_scrofa___AGPAT2	1.81549	6.021	22.4827	5.03128e-05	0.00200035	19	4	Up-regulated
Sus_scrofa___ASCC3	0.933946	8.37004	22.448	5.05703e-05	0.00200521	19	4	Up-regulated
Sus_scrofa___CRK	0.859223	8.21905	22.3514	5.20368e-05	0.0020415	19	4	Up-regulated
Sus_scrofa___PSMD14	1.49755	6.75687	22.3495	5.21808e-05	0.00204174	19	4	Up-regulated
Sus_scrofa___BPNT1	1.55329	4.52851	22.2726	5.28036e-05	0.0020595	19	4	Up-regulated
Sus_scrofa___WNK3	3.06085	3.19675	21.6498	5.32264e-05	0.00206357	19	4	Up-regulated
Sus_scrofa___SLC20A2	3.20694	6.7495	22.2268	5.39982e-05	0.00208802	19	4	Up-regulated
Sus_scrofa___SOD2	2.64933	6.13355	22.2023	5.43547e-05	0.00209907	19	4	Up-regulated
Sus_scrofa___ZNF317	1.37803	4.37388	22.1733	5.4484e-05	0.00210132	19	4	Up-regulated
Sus_scrofa___GPR158	2.53631	3.8127	21.583	5.50216e-05	0.0021193	19	4	Up-regulated
Sus_scrofa___VPS37A	1.78064	5.3106	22.1578	5.52283e-05	0.00212244	19	4	Up-regulated
Sus_scrofa___MRTO4	1.78151	4.93395	22.132	5.52466e-05	0.00212244	19	4	Up-regulated
Sus_scrofa___FAM111A	1.52812	5.79963	22.1429	5.56628e-05	0.0021329	19	4	Up-regulated
Sus_scrofa___SLC7A1	2.7163	4.82002	21.8417	5.6336e-05	0.00215591	19	4	Up-regulated
Sus_scrofa___KATNAL2	2.53716	2.99974	21.2209	5.88608e-05	0.00222949	19	4	Up-regulated
Sus_scrofa___ZNHIT6	1.46259	8.35095	21.9189	5.91714e-05	0.00223684	19	4	Up-regulated
Sus_scrofa___ANGPT4	2.92785	6.38013	21.7875	6.14602e-05	0.00230729	19	4	Up-regulated
Sus_scrofa___RAB5A	0.858408	6.7491	21.7534	6.22398e-05	0.0023251	19	4	Up-regulated
Sus_scrofa___SELENOS	1.43366	4.86899	21.7577	6.22578e-05	0.0023251	19	4	Up-regulated
Sus_scrofa___SNX18	2.98539	5.27445	21.5693	6.24057e-05	0.0023251	19	4	Up-regulated
Sus_scrofa___EPRS1	1.13898	6.54954	21.7332	6.2673e-05	0.00233213	19	4	Up-regulated
Sus_scrofa___USP45	2.51298	4.95989	21.5823	6.29032e-05	0.00233776	19	4	Up-regulated
Sus_scrofa___DPH6	1.0766	7.04332	21.6835	6.35378e-05	0.00234662	19	4	Up-regulated
Sus_scrofa___LRPPRC	1.44339	6.67094	21.6357	6.45448e-05	0.00237493	19	4	Up-regulated
Sus_scrofa___FAM162A	3.06386	5.27257	21.4153	6.48033e-05	0.00237661	19	4	Up-regulated
Sus_scrofa___ADAMTS9	2.16851	8.49651	21.6143	6.48314e-05	0.00237661	19	4	Up-regulated
Sus_scrofa___PSMB7	1.10539	5.99489	21.5654	6.60448e-05	0.00240621	19	4	Up-regulated
Sus_scrofa___UBA5	0.891868	6.29879	21.5315	6.66068e-05	0.00242073	19	4	Up-regulated
Sus_scrofa___PTGS2	4.53299	6.6603	21.2573	6.76076e-05	0.00244809	19	4	Up-regulated
Sus_scrofa___SPCS3	1.45119	5.33862	21.4719	6.80464e-05	0.00245797	19	4	Up-regulated
Sus_scrofa___STK40	1.77699	4.79446	21.4167	6.81871e-05	0.00246005	19	4	Up-regulated
Sus_scrofa___SOCS5	1.24478	8.25587	21.3858	6.94333e-05	0.00249589	19	4	Up-regulated
Sus_scrofa___TRAPPC13	2.56784	4.50896	21.0054	7.18205e-05	0.00256923	19	4	Up-regulated
Sus_scrofa___RTN4IP1	2.98492	4.04167	20.6546	7.24135e-05	0.0025842	19	4	Up-regulated
Sus_scrofa___SSR2	1.18364	5.9832	21.2202	7.33038e-05	0.00260621	19	4	Up-regulated
Sus_scrofa___MAP3K8	1.80505	6.64393	21.1473	7.48551e-05	0.00264284	19	4	Up-regulated
Sus_scrofa___CPM	2.11351	8.05667	21.1388	7.48598e-05	0.00264284	19	4	Up-regulated
Sus_scrofa___NAA40	2.5153	3.42687	20.4332	7.65365e-05	0.00269882	19	4	Up-regulated
Sus_scrofa___SBNO2	1.19176	6.68816	21.0311	7.74339e-05	0.00272398	19	4	Up-regulated
Sus_scrofa___TERF2	1.19738	5.41104	21.0192	7.81017e-05	0.00274421	19	4	Up-regulated
Sus_scrofa___NOCT	4.89431	4.88028	20.4037	7.85317e-05	0.00275541	19	4	Up-regulated
Sus_scrofa___LRRFIP1	2.19557	8.68437	20.9768	7.86064e-05	0.00275541	19	4	Up-regulated
Sus_scrofa___USO1	0.977433	7.65491	20.9603	7.90047e-05	0.0027661	19	4	Up-regulated
Sus_scrofa___NUP93	2.1145	4.24241	20.7499	7.92331e-05	0.00277082	19	4	Up-regulated
Sus_scrofa___YIPF2	1.3141	6.16223	20.935	7.98939e-05	0.00278735	19	4	Up-regulated
Sus_scrofa___PDLIM1	2.28684	5.99457	20.9023	8.05791e-05	0.00280135	19	4	Up-regulated
Sus_scrofa___IGFBP4	2.17131	6.77476	20.862	8.1671e-05	0.00283599	19	4	Up-regulated
Sus_scrofa___WDR70	0.839191	7.62421	20.749	8.42653e-05	0.00290225	19	4	Up-regulated
Sus_scrofa___CSTF3	0.97125	7.55649	20.7151	8.515e-05	0.00292932	19	4	Up-regulated
Sus_scrofa___BTF3L4	1.23952	5.95427	20.6816	8.63773e-05	0.00296465	19	4	Up-regulated
Sus_scrofa___TNK2	2.38429	4.88754	20.5356	8.69948e-05	0.00297772	19	4	Up-regulated
Sus_scrofa___ENSSSCG00000016646	2.48013	5.4721	20.6013	8.71449e-05	0.00297772	19	4	Up-regulated
Sus_scrofa___NAA15	1.01957	7.22353	20.6167	8.77826e-05	0.00299553	19	4	Up-regulated
Sus_scrofa___PDIA5	2.05887	5.74466	20.5851	8.88145e-05	0.00302467	19	4	Up-regulated
Sus_scrofa___BLZF1	1.68257	4.49215	20.5276	8.88408e-05	0.00302467	19	4	Up-regulated
Sus_scrofa___ITGA5	2.10792	6.87207	20.5752	8.91258e-05	0.00303089	19	4	Up-regulated
Sus_scrofa___CIBAR1	1.31873	5.89966	20.5592	8.97136e-05	0.00304457	19	4	Up-regulated
Sus_scrofa___GNPDA2	2.02844	5.37963	20.5345	8.98363e-05	0.00304457	19	4	Up-regulated
Sus_scrofa___AVIL	3.09419	3.9792	19.8354	9.27853e-05	0.00313018	19	4	Up-regulated
Sus_scrofa___SLC25A20	2.12444	4.52622	20.3035	9.30526e-05	0.00313563	19	4	Up-regulated
Sus_scrofa___RSBN1	1.51064	6.00969	20.4113	9.38672e-05	0.00315232	19	4	Up-regulated
Sus_scrofa___ENSSSCG00000037274	1.25434	7.15917	20.3569	9.51091e-05	0.00318071	19	4	Up-regulated
Sus_scrofa___ARF4	0.922448	6.38247	20.3598	9.51421e-05	0.00318071	19	4	Up-regulated
Sus_scrofa___CDV3	1.10872	6.59656	20.3004	9.68725e-05	0.00322763	19	4	Up-regulated
Sus_scrofa___NIFK	1.47476	5.43152	20.2551	9.85996e-05	0.00325511	19	4	Up-regulated
Sus_scrofa___FLAD1	3.51884	3.00889	19.7797	0.000100016	0.00329164	19	4	Up-regulated
Sus_scrofa___PDE4B	3.53443	7.91664	20.179	0.000100736	0.00330356	19	4	Up-regulated
Sus_scrofa___ENSSSCG00000034715	2.79573	3.25384	19.5791	0.000100824	0.00330356	19	4	Up-regulated
Sus_scrofa___HIRA	1.15516	6.08453	20.1353	0.000102131	0.0033353	19	4	Up-regulated
Sus_scrofa___ENSSSCG00000040187	1.65626	4.46906	20.0718	0.000102318	0.00333773	19	4	Up-regulated
Sus_scrofa___ABL2	0.964373	7.28379	20.1142	0.00010249	0.00333901	19	4	Up-regulated
Sus_scrofa___CALU	0.956399	8.06249	20.11	0.000102583	0.00333901	19	4	Up-regulated
Sus_scrofa___ENSSSCG00000036257	1.69867	4.86	20.0672	0.000103574	0.00336359	19	4	Up-regulated
Sus_scrofa___ZNF248	1.35233	5.81284	20.0877	0.000103792	0.00336359	19	4	Up-regulated
Sus_scrofa___KPNA7	1.43266	5.32795	20.0826	0.000104017	0.00336671	19	4	Up-regulated
Sus_scrofa___ST3GAL1	1.35738	7.71155	20.0631	0.000104116	0.00336671	19	4	Up-regulated
Sus_scrofa___PDE4A	1.51538	4.72469	20.0285	0.000105021	0.00338857	19	4	Up-regulated
Sus_scrofa___PLAA	1.0142	6.42963	20.0296	0.000105377	0.003389	19	4	Up-regulated
Sus_scrofa___SRSF10	1.13337	7.47445	19.9898	0.000106519	0.00341461	19	4	Up-regulated
Sus_scrofa___TPM4	1.80013	6.87952	19.9784	0.000107094	0.00342932	19	4	Up-regulated
Sus_scrofa___FSD1L	1.0463	6.69279	19.9542	0.00010781	0.00344481	19	4	Up-regulated
Sus_scrofa___RAB10	0.900738	7.56823	19.9439	0.000108035	0.00344827	19	4	Up-regulated
Sus_scrofa___UBQLN1	0.930785	6.67699	19.916	0.00010909	0.00347447	19	4	Up-regulated
Sus_scrofa___REXO2	0.913447	8.89331	19.9082	0.00010921	0.00347455	19	4	Up-regulated
Sus_scrofa___SELENOM	1.572	4.44848	19.8416	0.000110297	0.00350537	19	4	Up-regulated
Sus_scrofa___ERRFI1	3.07286	7.42135	19.8738	0.000110767	0.00351653	19	4	Up-regulated
Sus_scrofa___IL17RA	1.30297	5.04952	19.8752	0.000110981	0.00351956	19	4	Up-regulated
Sus_scrofa___CSNK1A1	0.75544	7.95655	19.8422	0.000111498	0.0035284	19	4	Up-regulated
Sus_scrofa___TAMM41	1.67835	4.43971	19.7213	0.000113908	0.00357789	19	4	Up-regulated
Sus_scrofa___SMYD5	2.51005	3.21831	19.155	0.000114828	0.00359971	19	4	Up-regulated
Sus_scrofa___PPRC1	1.61458	5.3124	19.7596	0.000114846	0.00359971	19	4	Up-regulated
Sus_scrofa___POLR3B	2.25373	4.84186	19.6347	0.000115698	0.00361829	19	4	Up-regulated
Sus_scrofa___BZW2	3.08411	4.53706	19.3274	0.00011574	0.00361829	19	4	Up-regulated
Sus_scrofa___FBXO30	2.41354	5.33196	19.6673	0.000116245	0.00362821	19	4	Up-regulated
Sus_scrofa___RRP8	2.29248	4.27195	19.467	0.000116903	0.00364266	19	4	Up-regulated
Sus_scrofa___PSMA3	0.98258	6.53761	19.6481	0.000118656	0.00368792	19	4	Up-regulated
Sus_scrofa___UGP2	2.33405	8.28563	19.6341	0.000119047	0.00369619	19	4	Up-regulated
Sus_scrofa___LARP4	1.00547	7.46638	19.6264	0.000119314	0.00369673	19	4	Up-regulated
Sus_scrofa___DAG1	2.24797	5.65892	19.619	0.00011945	0.00369709	19	4	Up-regulated
Sus_scrofa___MAPK6	1.31081	5.68925	19.5932	0.000121145	0.0037365	19	4	Up-regulated
Sus_scrofa___PRUNE1	3.10484	3.21481	19.0792	0.000121289	0.0037365	19	4	Up-regulated
Sus_scrofa___FPGS	2.25177	3.72799	19.1701	0.000121354	0.0037365	19	4	Up-regulated
Sus_scrofa___ADM	3.67299	6.32066	19.4714	0.000122116	0.00375215	19	4	Up-regulated
Sus_scrofa___RAD23A	1.67742	4.68846	19.4983	0.000123338	0.00377481	19	4	Up-regulated
Sus_scrofa___VCP	1.91218	5.23573	19.4496	0.000125895	0.0038359	19	4	Up-regulated
Sus_scrofa___EFL1	1.07228	6.75246	19.4556	0.000126007	0.0038359	19	4	Up-regulated
Sus_scrofa___ABCD3	1.65003	5.47722	19.4318	0.000127331	0.00386824	19	4	Up-regulated
Sus_scrofa___TADA2A	0.931338	6.52889	19.3646	0.000129708	0.00392837	19	4	Up-regulated
Sus_scrofa___ZNF404	2.00483	3.63205	18.9369	0.000132787	0.00400934	19	4	Up-regulated
Sus_scrofa___RPH3A	3.0328	7.47825	19.2347	0.000135351	0.00407842	19	4	Up-regulated
Sus_scrofa___USP5	1.54342	4.54052	19.1948	0.000135777	0.00408712	19	4	Up-regulated
Sus_scrofa___ENSSSCG00000013715	1.17561	5.31284	19.2081	0.000136928	0.0041134	19	4	Up-regulated
Sus_scrofa___SACS	1.97376	4.03684	18.9734	0.000138093	0.00413998	19	4	Up-regulated
Sus_scrofa___NT5DC2	4.55796	2.75679	19.1869	0.000138271	0.00414113	19	4	Up-regulated
Sus_scrofa___ANPEP	4.62852	5.05832	18.5607	0.000139399	0.00417071	19	4	Up-regulated
Sus_scrofa___STC2	5.22756	5.64749	18.5489	0.000139772	0.00417344	19	4	Up-regulated
Sus_scrofa___ACSL5	1.03511	6.2772	19.1269	0.000139947	0.00417446	19	4	Up-regulated
Sus_scrofa___IL1R1	1.50661	9.14821	19.0794	0.000141735	0.00421929	19	4	Up-regulated
Sus_scrofa___LARS2	1.01112	5.92639	19.0877	0.00014188	0.00421937	19	4	Up-regulated
Sus_scrofa___EXTL3	2.04803	4.732	19.0044	0.000142288	0.00422725	19	4	Up-regulated
Sus_scrofa___SPATA2	1.90281	3.33963	18.5993	0.000144313	0.0042831	19	4	Up-regulated
Sus_scrofa___RILPL1	1.89196	5.4386	19.0162	0.00014484	0.00429446	19	4	Up-regulated
Sus_scrofa___RNF7	2.43172	4.75179	18.8252	0.000147451	0.00435444	19	4	Up-regulated
Sus_scrofa___ME1	3.63858	5.79063	18.7589	0.000148823	0.00438957	19	4	Up-regulated
Sus_scrofa___ENSSSCG00000027124	3.638	3.11326	18.5419	0.000150445	0.00441645	19	4	Up-regulated
Sus_scrofa___RBKS	1.25343	6.08607	18.8975	0.000150696	0.00441943	19	4	Up-regulated
Sus_scrofa___ZMAT3	3.50638	4.45595	18.342	0.000152135	0.00445722	19	4	Up-regulated
Sus_scrofa___AIFM2	2.38435	3.16454	18.2757	0.000153399	0.00448538	19	4	Up-regulated
Sus_scrofa___PTPN11	0.951745	6.94458	18.7869	0.0001557	0.00454368	19	4	Up-regulated
Sus_scrofa___ABHD17C	1.45348	4.89258	18.7383	0.000158378	0.00459467	19	4	Up-regulated
Sus_scrofa___MRPS28	1.91412	5.62308	18.7074	0.000160029	0.00462896	19	4	Up-regulated
Sus_scrofa___FH	1.69581	4.70756	18.6606	0.000160928	0.00465043	19	4	Up-regulated
Sus_scrofa___PRMT2	1.3933	9.36947	18.6769	0.000161143	0.00465209	19	4	Up-regulated
Sus_scrofa___TRMT5	2.01721	3.56896	18.286	0.000163463	0.00469763	19	4	Up-regulated
Sus_scrofa___GPM6B	1.66965	8.20603	18.6321	0.000163513	0.00469763	19	4	Up-regulated
Sus_scrofa___KMT5A	1.20041	5.0172	18.6377	0.000164184	0.00470321	19	4	Up-regulated
Sus_scrofa___ENSSSCG00000006061	1.79946	6.13005	18.6022	0.000165701	0.00474083	19	4	Up-regulated
Sus_scrofa___SLC10A7	0.956789	7.4886	18.5817	0.000166199	0.00474714	19	4	Up-regulated
Sus_scrofa___PGGT1B	0.982519	6.2617	18.5818	0.000166518	0.00474714	19	4	Up-regulated
Sus_scrofa___KLF10	1.63241	5.30154	18.3917	0.000177188	0.00500793	19	4	Up-regulated
Sus_scrofa___SLC39A6	1.41076	5.89891	18.3559	0.000179416	0.00505162	19	4	Up-regulated
Sus_scrofa___RASSF8	1.20848	8.21362	18.3291	0.000180246	0.00506115	19	4	Up-regulated
Sus_scrofa___ERP29	1.726	4.47215	18.2811	0.000180267	0.00506115	19	4	Up-regulated
Sus_scrofa___SRPK2	1.04435	8.77551	18.3054	0.000181612	0.00508445	19	4	Up-regulated
Sus_scrofa___IPO7	1.08984	7.1835	18.2781	0.000183326	0.0051276	19	4	Up-regulated
Sus_scrofa___DBF4B	2.45648	2.98435	17.7348	0.000184134	0.00514396	19	4	Up-regulated
Sus_scrofa___DNAJB9	1.90996	3.9598	18.0826	0.000184259	0.00514396	19	4	Up-regulated
Sus_scrofa___SERPINE2	2.07252	9.27453	18.2265	0.000186313	0.00519642	19	4	Up-regulated
Sus_scrofa___PPTC7	2.25257	4.77032	18.1141	0.000188095	0.00523995	19	4	Up-regulated
Sus_scrofa___IARS1	0.828062	7.796	18.195	0.000188245	0.00523995	19	4	Up-regulated
Sus_scrofa___MED28	1.9719	3.41965	17.7483	0.00019336	0.00534765	19	4	Up-regulated
Sus_scrofa___GCLC	2.29195	4.23021	17.8937	0.000194618	0.00537742	19	4	Up-regulated
Sus_scrofa___ENSSSCG00000005103	1.59052	4.75071	18.0732	0.000195316	0.00538664	19	4	Up-regulated
Sus_scrofa___PDCD11	1.85869	4.7052	18.0278	0.000196313	0.0054091	19	4	Up-regulated
Sus_scrofa___USP49	1.71489	4.38274	17.9945	0.000197436	0.00542994	19	4	Up-regulated
Sus_scrofa___TLCD2	2.69353	4.07662	17.657	0.000198578	0.00545629	19	4	Up-regulated
Sus_scrofa___MON1A	5.55209	2.01927	17.8728	0.000201314	0.0055161	19	4	Up-regulated
Sus_scrofa___C3	2.57626	7.64301	17.9513	0.000204072	0.00558631	19	4	Up-regulated
Sus_scrofa___ZCCHC7	0.852488	8.86473	17.932	0.000205006	0.00559656	19	4	Up-regulated
Sus_scrofa___DARS1	0.856508	7.26594	17.9247	0.000205581	0.0056071	19	4	Up-regulated
Sus_scrofa___TMEM98	2.83359	3.20924	17.4426	0.000206524	0.00562763	19	4	Up-regulated
Sus_scrofa___TSFM	1.7216	4.28059	17.8313	0.000207009	0.00562828	19	4	Up-regulated
Sus_scrofa___ENSSSCG00000046436	3.02476	3.49497	17.4071	0.000208892	0.00564543	19	4	Up-regulated
Sus_scrofa___NT5C3B	3.06571	2.90776	17.4718	0.000209205	0.00564543	19	4	Up-regulated
Sus_scrofa___PRMT1	1.50562	5.00419	17.8771	0.000209213	0.00564543	19	4	Up-regulated
Sus_scrofa___DCDC1	1.67813	4.43218	17.8064	0.000210557	0.00566457	19	4	Up-regulated
Sus_scrofa___IDH3A	3.19854	3.50314	17.3735	0.000212421	0.00570437	19	4	Up-regulated
Sus_scrofa___AMH	1.50365	4.83791	17.8178	0.000212881	0.00571153	19	4	Up-regulated
Sus_scrofa___MAPK12	2.16783	4.87452	17.7491	0.000213803	0.00572074	19	4	Up-regulated
Sus_scrofa___NME1	2.09428	4.06654	17.5961	0.0002148	0.00574221	19	4	Up-regulated
Sus_scrofa___GPI	1.79593	6.85735	17.7774	0.00021605	0.00577041	19	4	Up-regulated
Sus_scrofa___QTRT2	1.81255	4.21743	17.6606	0.000217204	0.00579601	19	4	Up-regulated
Sus_scrofa___NARS2	1.33475	5.9974	17.7374	0.000219239	0.00583981	19	4	Up-regulated
Sus_scrofa___SUCLG2	0.934526	7.76201	17.7203	0.000219736	0.00584777	19	4	Up-regulated
Sus_scrofa___LCLAT1	1.39734	6.4357	17.706	0.00022123	0.00587768	19	4	Up-regulated
Sus_scrofa___GCN1	1.0032	6.28944	17.6804	0.000223046	0.00591462	19	4	Up-regulated
Sus_scrofa___OSBP	1.09051	5.74547	17.6718	0.000224146	0.00592516	19	4	Up-regulated
Sus_scrofa___YWHAZ	1.22808	7.94278	17.6583	0.000224244	0.00592516	19	4	Up-regulated
Sus_scrofa___GPD2	2.196	6.16107	17.6264	0.000227268	0.00598905	19	4	Up-regulated
Sus_scrofa___PRMT7	1.18873	6.24825	17.5458	0.000233214	0.00611311	19	4	Up-regulated
Sus_scrofa___CHST11	2.95879	8.85621	17.4943	0.000236738	0.00618905	19	4	Up-regulated
Sus_scrofa___KANK2	1.56906	6.62838	17.4935	0.000237177	0.00619506	19	4	Up-regulated
Sus_scrofa___USP53	2.5138	8.69233	17.4781	0.000237959	0.00620453	19	4	Up-regulated
Sus_scrofa___TRIM46	2.8676	3.03876	17.0371	0.00023938	0.0062361	19	4	Up-regulated
Sus_scrofa___TXNL1	1.72919	5.81799	17.4567	0.000240499	0.00625973	19	4	Up-regulated
Sus_scrofa___ENSSSCG00000035751	2.84435	6.6596	17.4436	0.000241129	0.00627063	19	4	Up-regulated
Sus_scrofa___ITGB1	1.63808	9.01425	17.4316	0.000241574	0.00627668	19	4	Up-regulated
Sus_scrofa___MMS19	1.56069	5.15343	17.405	0.000244409	0.00633599	19	4	Up-regulated
Sus_scrofa___ENSSSCG00000021946	1.66834	5.8044	17.407	0.000244498	0.00633599	19	4	Up-regulated
Sus_scrofa___ARMCX3	1.87142	4.14487	17.2719	0.000245275	0.00634406	19	4	Up-regulated
Sus_scrofa___ATF6	0.808836	8.105	17.3757	0.000246082	0.00634925	19	4	Up-regulated
Sus_scrofa___PRKACA	1.83401	4.38807	17.2597	0.000249903	0.00642547	19	4	Up-regulated
Sus_scrofa___ZNF800	1.0052	6.02415	17.2678	0.000255722	0.00654665	19	4	Up-regulated
Sus_scrofa___SELENOF	1.36276	5.42524	17.2619	0.000256717	0.00656646	19	4	Up-regulated
Sus_scrofa___MCCC1	0.854245	7.15855	17.2236	0.000258884	0.0066104	19	4	Up-regulated
Sus_scrofa___PTPN2	0.948486	7.09938	17.2216	0.00025908	0.0066104	19	4	Up-regulated
Sus_scrofa___STIP1	2.84061	3.53919	16.7693	0.000259104	0.0066104	19	4	Up-regulated
Sus_scrofa___UMPS	0.867124	5.43826	17.2203	0.000260372	0.00663055	19	4	Up-regulated
Sus_scrofa___CBLL1	1.32974	5.233	17.2174	0.000260566	0.00663055	19	4	Up-regulated
Sus_scrofa___USP14	0.803754	6.25229	17.1873	0.000262379	0.00665528	19	4	Up-regulated
Sus_scrofa___CAPRIN1	0.735305	7.47818	17.1818	0.000262436	0.00665528	19	4	Up-regulated
Sus_scrofa___TMEM168	1.22323	6.34199	17.181	0.000263015	0.00666425	19	4	Up-regulated
Sus_scrofa___POLR3E	1.38592	5.24919	17.1751	0.000264165	0.00668196	19	4	Up-regulated
Sus_scrofa___POLR1G	2.15811	3.20679	16.7018	0.000265965	0.00672175	19	4	Up-regulated
Sus_scrofa___CSMD3	1.69472	3.8898	17.0084	0.000266208	0.00672215	19	4	Up-regulated
Sus_scrofa___TAGLN	2.09958	6.6356	17.1342	0.00026732	0.00673873	19	4	Up-regulated
Sus_scrofa___CEBPB	1.77208	5.40131	17.1029	0.000269955	0.00679938	19	4	Up-regulated
Sus_scrofa___NXF1	0.921121	6.10457	17.0825	0.000271835	0.00682645	19	4	Up-regulated
Sus_scrofa___MAK16	1.18763	4.45931	17.0799	0.000271952	0.00682645	19	4	Up-regulated
Sus_scrofa___ENSSSCG00000020808	1.19018	6.01177	17.0597	0.000274088	0.00687424	19	4	Up-regulated
Sus_scrofa___LARS1	0.912506	7.48245	17.0426	0.000274877	0.00688352	19	4	Up-regulated
Sus_scrofa___GFPT1	1.0207	6.54064	17.0455	0.000274922	0.00688352	19	4	Up-regulated
Sus_scrofa___HPRT1	1.3553	5.15568	17.0445	0.000275875	0.00690154	19	4	Up-regulated
Sus_scrofa___SLC25A13	1.03036	7.08749	17.0215	0.000276901	0.00692137	19	4	Up-regulated
Sus_scrofa___EXOC5	1.21494	6.93406	17.0165	0.000277457	0.0069294	19	4	Up-regulated
Sus_scrofa___AIFM1	2.23142	4.54057	16.8999	0.000278424	0.00694769	19	4	Up-regulated
Sus_scrofa___SEC13	0.928247	6.71288	16.9963	0.00027935	0.00695738	19	4	Up-regulated
Sus_scrofa___DNAJB6	1.15724	6.44119	16.998	0.000279411	0.00695738	19	4	Up-regulated
Sus_scrofa___ZZZ3	0.818591	8.27851	16.9917	0.000279516	0.00695738	19	4	Up-regulated
Sus_scrofa___PREB	2.05939	4.20367	16.8278	0.000281982	0.00701285	19	4	Up-regulated
Sus_scrofa___DPP3	1.68894	4.87607	16.9393	0.00028379	0.0070519	19	4	Up-regulated
Sus_scrofa___ENSSSCG00000007554	1.80885	4.65279	16.8722	0.00028783	0.00712837	19	4	Up-regulated
Sus_scrofa___ETV3	1.36227	4.51054	16.8526	0.000292465	0.00723107	19	4	Up-regulated
Sus_scrofa___PEX6	1.56147	3.13999	16.5021	0.00029444	0.00727382	19	4	Up-regulated
Sus_scrofa___SELENOT	1.31848	5.48143	16.8256	0.000296814	0.00731603	19	4	Up-regulated
Sus_scrofa___PCCB	1.34017	5.98966	16.8209	0.00029689	0.00731603	19	4	Up-regulated
Sus_scrofa___FBXO42	0.940918	7.28672	16.7911	0.000298991	0.00734736	19	4	Up-regulated
Sus_scrofa___NDUFAF6	1.49022	4.25012	16.7524	0.000299153	0.00734736	19	4	Up-regulated
Sus_scrofa___PTK7	1.24414	6.53993	16.7887	0.000299615	0.00735261	19	4	Up-regulated
Sus_scrofa___TMED5	1.59095	5.33803	16.7804	0.000300966	0.00737964	19	4	Up-regulated
Sus_scrofa___NT5DC1	1.50798	6.57871	16.7347	0.000305174	0.00745813	19	4	Up-regulated
Sus_scrofa___ASIC2	2.4427	4.76727	16.6141	0.000306277	0.00747892	19	4	Up-regulated
Sus_scrofa___CCDC66	0.964032	6.54741	16.7102	0.000307485	0.00750223	19	4	Up-regulated
Sus_scrofa___ELL2	3.9823	6.08994	16.5569	0.000308547	0.00751576	19	4	Up-regulated
Sus_scrofa___DNAJB1	3.33486	3.17851	16.3605	0.000309682	0.00753722	19	4	Up-regulated
Sus_scrofa___GART	0.864944	5.67967	16.6765	0.000311782	0.00756664	19	4	Up-regulated
Sus_scrofa___STIL	1.88294	3.83276	16.4734	0.000313718	0.00758558	19	4	Up-regulated
Sus_scrofa___TIMP1	3.83215	6.26889	16.5535	0.000314618	0.00760056	19	4	Up-regulated
Sus_scrofa___ADAMTS3	4.09028	6.75763	16.5596	0.000316965	0.00764378	19	4	Up-regulated
Sus_scrofa___LIN52	2.34599	3.57942	16.2173	0.00032067	0.00770961	19	4	Up-regulated
Sus_scrofa___LARP1B	3.08322	4.17363	16.2054	0.000321062	0.00771277	19	4	Up-regulated
Sus_scrofa___HIF1A	1.28572	7.22815	16.5725	0.000321838	0.00772064	19	4	Up-regulated
Sus_scrofa___CLU	3.45213	4.97288	16.2849	0.000322979	0.00774001	19	4	Up-regulated
Sus_scrofa___SNAPC1	1.73891	6.0159	16.5638	0.0003237	0.00775095	19	4	Up-regulated
Sus_scrofa___ENSSSCG00000016441	1.66947	4.50531	16.5218	0.000323959	0.00775095	19	4	Up-regulated
Sus_scrofa___SYNCRIP	0.883771	7.00685	16.5059	0.00032914	0.0078622	19	4	Up-regulated
Sus_scrofa___CDK2AP1	2.66751	3.21625	16.078	0.000329577	0.0078663	19	4	Up-regulated
Sus_scrofa___BDKRB2	4.76506	4.4578	16.1651	0.000331644	0.00790926	19	4	Up-regulated
Sus_scrofa___ETF1	1.04436	6.50523	16.4501	0.00033568	0.00799908	19	4	Up-regulated
Sus_scrofa___ETFA	1.17607	6.85942	16.4263	0.000338235	0.00805134	19	4	Up-regulated
Sus_scrofa___ENSSSCG00000038852	2.81027	2.06252	15.7875	0.000338417	0.00805134	19	4	Up-regulated
Sus_scrofa___PFDN2	1.31686	4.94875	16.4247	0.000339431	0.0080625	19	4	Up-regulated
Sus_scrofa___FADD	2.08722	2.64967	15.8791	0.00034262	0.00813173	19	4	Up-regulated
Sus_scrofa___ENSSSCG00000005307	4.02041	1.15608	14.9866	0.000345315	0.00818259	19	4	Up-regulated
Sus_scrofa___SLC25A15	1.5874	5.02817	16.358	0.000346291	0.00819915	19	4	Up-regulated
Sus_scrofa___RYBP	0.913705	7.15763	16.318	0.000350674	0.00828307	19	4	Up-regulated
Sus_scrofa___ST6GAL2	2.10674	5.92772	16.3178	0.00035139	0.00828818	19	4	Up-regulated
Sus_scrofa___TPK1	2.30936	5.4264	16.274	0.000353844	0.00833136	19	4	Up-regulated
Sus_scrofa___PDE12	2.51895	3.32541	15.8737	0.000354209	0.00833333	19	4	Up-regulated
Sus_scrofa___PCYT1A	1.03086	6.42426	16.2658	0.000357335	0.00839355	19	4	Up-regulated
Sus_scrofa___BPNT2	1.31175	5.60332	16.2484	0.000360399	0.00845211	19	4	Up-regulated
Sus_scrofa___SKP2	2.31559	3.8212	15.959	0.000362268	0.0084758	19	4	Up-regulated
Sus_scrofa___ENSSSCG00000045482	1.0328	6.48058	16.2169	0.000363271	0.00848588	19	4	Up-regulated
Sus_scrofa___RDH10	1.95717	7.1095	16.2014	0.000365204	0.00851668	19	4	Up-regulated
Sus_scrofa___ACTL6A	1.58689	4.56918	16.1791	0.000365399	0.00851668	19	4	Up-regulated
Sus_scrofa___GABRG3	3.23396	2.43089	15.7857	0.00036722	0.00854443	19	4	Up-regulated
Sus_scrofa___PMAIP1	2.97927	3.33415	15.7931	0.000367861	0.00854592	19	4	Up-regulated
Sus_scrofa___SNX19	1.27032	4.8738	16.1741	0.000369561	0.00857196	19	4	Up-regulated
Sus_scrofa___VCL	2.6399	8.5237	16.1379	0.000372792	0.00864013	19	4	Up-regulated
Sus_scrofa___UHRF1BP1	1.54444	5.50474	16.1174	0.000376652	0.00870236	19	4	Up-regulated
Sus_scrofa___PRDX1	2.00715	4.24064	15.9923	0.000377452	0.00870783	19	4	Up-regulated
Sus_scrofa___SPPL2A	1.15088	5.78226	16.1036	0.000378351	0.00871975	19	4	Up-regulated
Sus_scrofa___SRFBP1	1.24301	5.82371	16.098	0.000379055	0.00872387	19	4	Up-regulated
Sus_scrofa___SPIRE2	2.18473	3.78282	15.7982	0.000384045	0.00883184	19	4	Up-regulated
Sus_scrofa___NUDT21	0.823672	5.85764	16.0525	0.000384745	0.00884107	19	4	Up-regulated
Sus_scrofa___SPRYD4	2.57266	2.76148	15.6345	0.000385377	0.00884367	19	4	Up-regulated
Sus_scrofa___RBM28	1.05479	5.12661	16.0444	0.000386839	0.00886616	19	4	Up-regulated
Sus_scrofa___KLHL11	1.99371	3.2334	15.6757	0.000387092	0.00886616	19	4	Up-regulated
Sus_scrofa___PGP	3.03036	2.91541	15.6788	0.000389183	0.00890162	19	4	Up-regulated
Sus_scrofa___REV3L	0.779117	9.26982	15.9965	0.00039102	0.0089366	19	4	Up-regulated
Sus_scrofa___NRG3	1.99628	3.63908	15.748	0.000391316	0.0089366	19	4	Up-regulated
Sus_scrofa___ADAMTS4	4.95975	4.2837	15.7358	0.000392256	0.00895016	19	4	Up-regulated
Sus_scrofa___PPME1	1.96804	6.02827	15.9944	0.000392514	0.00895016	19	4	Up-regulated
Sus_scrofa___ENSSSCG00000013082	2.07382	3.19102	15.5838	0.000395208	0.00899774	19	4	Up-regulated
Sus_scrofa___ENSSSCG00000031349	1.40931	3.96648	15.8803	0.000399619	0.00907317	19	4	Up-regulated
Sus_scrofa___RAP1GDS1	1.14263	5.85416	15.9399	0.000399979	0.00907317	19	4	Up-regulated
Sus_scrofa___NOB1	1.94652	4.28265	15.8431	0.000400053	0.00907317	19	4	Up-regulated
Sus_scrofa___ICAM1	1.82588	5.23529	15.9043	0.000403598	0.00913958	19	4	Up-regulated
Sus_scrofa___TGDS	0.953917	5.30438	15.8681	0.000410695	0.00927194	19	4	Up-regulated
Sus_scrofa___C7	1.3473	10.4626	15.818	0.00041566	0.00936261	19	4	Up-regulated
Sus_scrofa___IFTAP	1.55056	4.35308	15.7491	0.000421616	0.00948236	19	4	Up-regulated
Sus_scrofa___WDR75	1.34863	6.09864	15.753	0.000426237	0.009579	19	4	Up-regulated
Sus_scrofa___ZBTB24	1.39958	3.7909	15.6138	0.000434173	0.00974258	19	4	Up-regulated
Sus_scrofa___MBNL3	1.31421	6.18087	15.6761	0.000437536	0.0098032	19	4	Up-regulated
Sus_scrofa___ENSSSCG00000022295	1.11576	5.91069	15.6674	0.000439076	0.00982284	19	4	Up-regulated
Sus_scrofa___HMGCS1	2.46922	3.97889	15.4026	0.000439928	0.00982706	19	4	Up-regulated
Sus_scrofa___HLCS	0.796489	7.15045	15.6367	0.000442583	0.00986404	19	4	Up-regulated
Sus_scrofa___DPH1	1.06633	4.59134	15.6305	0.00044549	0.00991184	19	4	Up-regulated
Sus_scrofa___ACER3	1.34375	9.12287	15.615	0.000445732	0.00991184	19	4	Up-regulated
Sus_scrofa___ENSSSCG00000043628	5.7329	3.83952	15.647	0.000453896	0.0100362	19	4	Up-regulated
Sus_scrofa___COQ5	1.83162	3.968	15.4397	0.00045417	0.0100362	19	4	Up-regulated
Sus_scrofa___THAP9	3.20294	3.63589	15.1948	0.000454371	0.0100362	19	4	Up-regulated
Sus_scrofa___RCOR2	5.36518	1.93737	15.3136	0.000455478	0.0100489	19	4	Up-regulated
Sus_scrofa___TACO1	2.36796	3.00088	15.1472	0.000455973	0.0100489	19	4	Up-regulated
Sus_scrofa___EIF2B3	0.862765	6.83113	15.5509	0.000456031	0.0100489	19	4	Up-regulated
Sus_scrofa___ENSSSCG00000040763	1.62878	3.86062	15.444	0.000456306	0.0100489	19	4	Up-regulated
Sus_scrofa___PLEKHA6	3.05904	6.31952	15.535	0.000456728	0.0100507	19	4	Up-regulated
Sus_scrofa___ENSSSCG00000013366	1.98871	5.45459	15.5352	0.000458269	0.0100689	19	4	Up-regulated
Sus_scrofa___AVEN	1.03508	7.32092	15.5338	0.000458575	0.0100689	19	4	Up-regulated
Sus_scrofa___MPC2	2.58466	4.35763	15.3386	0.00045938	0.0100791	19	4	Up-regulated
Sus_scrofa___HRH1	3.06346	6.33667	15.5012	0.00046234	0.0101183	19	4	Up-regulated
Sus_scrofa___GPC5	5.48166	8.41259	15.4775	0.000463157	0.0101214	19	4	Up-regulated
Sus_scrofa___SYCP2	3.18511	6.5966	15.4989	0.000463357	0.0101214	19	4	Up-regulated
Sus_scrofa___ADAMTS6	3.43156	7.56746	15.4664	0.000470341	0.0102364	19	4	Up-regulated
Sus_scrofa___YARS1	1.04985	5.74141	15.4668	0.000470767	0.0102364	19	4	Up-regulated
Sus_scrofa___TIMM21	2.31767	2.8887	15.0457	0.000471387	0.0102364	19	4	Up-regulated
Sus_scrofa___COX10	2.46755	4.9417	15.3661	0.00047464	0.0102873	19	4	Up-regulated
Sus_scrofa___TSR1	1.69638	4.81261	15.4199	0.000475211	0.0102893	19	4	Up-regulated
Sus_scrofa___TP53	1.63716	4.71244	15.4053	0.000477371	0.0103244	19	4	Up-regulated
Sus_scrofa___WDR12	1.03144	5.38481	15.413	0.000480182	0.0103591	19	4	Up-regulated
Sus_scrofa___SNAP47	1.23685	6.0771	15.3914	0.000482804	0.0103923	19	4	Up-regulated
Sus_scrofa___MYCBP2	0.790239	9.68069	15.3762	0.000484113	0.0104019	19	4	Up-regulated
Sus_scrofa___PAK1IP1	1.69753	4.38933	15.3163	0.00048777	0.0104542	19	4	Up-regulated
Sus_scrofa___ENSSSCG00000006206	0.985517	7.24298	15.352	0.000488392	0.01046	19	4	Up-regulated
Sus_scrofa___ATP5MC2	2.55873	3.47638	14.9891	0.000488959	0.0104646	19	4	Up-regulated
Sus_scrofa___CHPT1	2.63195	4.26993	15.1157	0.000493065	0.0105361	19	4	Up-regulated
Sus_scrofa___MAPK1IP1L	0.927737	5.75842	15.3233	0.000494664	0.0105562	19	4	Up-regulated
Sus_scrofa___ACTB	1.84138	5.95098	15.3046	0.000497819	0.0106082	19	4	Up-regulated
Sus_scrofa___MIGA1	0.782535	6.82417	15.2877	0.000499554	0.0106222	19	4	Up-regulated
Sus_scrofa___ENSSSCG00000029347	2.08032	3.73665	15.0354	0.000504987	0.0107218	19	4	Up-regulated
Sus_scrofa___MICAL3	1.21923	7.47945	15.2348	0.000508682	0.0107854	19	4	Up-regulated
Sus_scrofa___SERHL2	2.52539	3.14697	14.8524	0.000510155	0.0108089	19	4	Up-regulated
Sus_scrofa___KIF24	4.36259	2.63942	15.1935	0.000510917	0.0108173	19	4	Up-regulated
Sus_scrofa___CDC20B	3.41209	3.97417	14.8549	0.000511482	0.0108215	19	4	Up-regulated
Sus_scrofa___NDUFS2	1.45626	4.80499	15.1986	0.000515484	0.0108906	19	4	Up-regulated
Sus_scrofa___NUDT2	2.9575	2.56435	14.8369	0.000517838	0.0109326	19	4	Up-regulated
Sus_scrofa___PTCD2	1.54595	4.39702	15.1227	0.000524447	0.0110485	19	4	Up-regulated
Sus_scrofa___GPR161	1.51232	7.27536	15.1392	0.000526077	0.011061	19	4	Up-regulated
Sus_scrofa___ENSSSCG00000039331	2.56606	3.87374	14.8622	0.000526162	0.011061	19	4	Up-regulated
Sus_scrofa___PABPC1	0.891952	7.11156	15.0984	0.000533513	0.0111679	19	4	Up-regulated
Sus_scrofa___MTERF1	1.27485	4.69368	15.0955	0.000535151	0.0111943	19	4	Up-regulated
Sus_scrofa___ENSSSCG00000033019	1.53107	5.24994	15.0901	0.000536473	0.0112027	19	4	Up-regulated
Sus_scrofa___WDR43	1.09464	7.3042	15.0813	0.000536686	0.0112027	19	4	Up-regulated
Sus_scrofa___LONP2	1.16931	7.35893	15.0638	0.000539981	0.0112477	19	4	Up-regulated
Sus_scrofa___FAM120A	0.844663	7.60052	15.0446	0.000543513	0.0113133	19	4	Up-regulated
Sus_scrofa___TMED10	0.924546	6.44509	15.0335	0.000546202	0.0113527	19	4	Up-regulated
Sus_scrofa___ECM2	1.68514	7.19543	15.0299	0.000546694	0.0113527	19	4	Up-regulated
Sus_scrofa___LMNB2	2.06398	3.20389	14.6906	0.000546937	0.0113527	19	4	Up-regulated
Sus_scrofa___MTO1	0.983594	5.13753	15.0152	0.00055189	0.011428	19	4	Up-regulated
Sus_scrofa___SMG5	2.37329	4.10624	14.8142	0.000552387	0.011428	19	4	Up-regulated
Sus_scrofa___ENSSSCG00000012566	1.85779	4.43019	14.9411	0.000552988	0.011428	19	4	Up-regulated
Sus_scrofa___ENSSSCG00000005901	1.76968	3.78607	14.856	0.000553276	0.011428	19	4	Up-regulated
Sus_scrofa___ENSSSCG00000036556	1.07373	7.72883	14.9914	0.000553728	0.011428	19	4	Up-regulated
Sus_scrofa___FLNA	1.72045	6.57085	14.9951	0.00055404	0.011428	19	4	Up-regulated
Sus_scrofa___C4A	3.06299	5.49189	14.9132	0.000554594	0.0114315	19	4	Up-regulated
Sus_scrofa___FAN1	1.22322	5.84157	14.9808	0.00055743	0.0114816	19	4	Up-regulated
Sus_scrofa___NRBF2	1.03936	5.49117	14.9816	0.000557797	0.0114816	19	4	Up-regulated
Sus_scrofa___ICAM2	1.06531	6.27824	14.9674	0.000559289	0.0114937	19	4	Up-regulated
Sus_scrofa___PCMT1	0.917567	6.61545	14.9622	0.00055987	0.0114937	19	4	Up-regulated
Sus_scrofa___PTPN21	1.13242	6.53294	14.9619	0.000560114	0.0114937	19	4	Up-regulated
Sus_scrofa___RSL1D1	1.38276	4.17827	14.9331	0.00056033	0.0114937	19	4	Up-regulated
Sus_scrofa___UBC	1.80944	5.82271	14.9476	0.000563859	0.0115501	19	4	Up-regulated
Sus_scrofa___ENSSSCG00000032146	2.90986	2.48907	14.5871	0.000564634	0.0115536	19	4	Up-regulated
Sus_scrofa___ZBTB43	1.91204	4.01617	14.8062	0.000566992	0.0115903	19	4	Up-regulated
Sus_scrofa___MAPKAPK2	1.34461	5.85987	14.9138	0.00057071	0.0116342	19	4	Up-regulated
Sus_scrofa___KLHDC2	0.969251	6.57743	14.8946	0.00057335	0.0116799	19	4	Up-regulated
Sus_scrofa___TTC39B	1.67545	5.84025	14.8746	0.000578609	0.011779	19	4	Up-regulated
Sus_scrofa___ARMC8	0.885619	6.50287	14.7949	0.000593847	0.0120231	19	4	Up-regulated
Sus_scrofa___PHB	1.27207	4.50633	14.7355	0.000606171	0.0122141	19	4	Up-regulated
Sus_scrofa___GSTO1	1.96038	3.2116	14.3999	0.000611863	0.0123204	19	4	Up-regulated
Sus_scrofa___RCC1	3.64881	2.68874	14.4761	0.000612947	0.0123339	19	4	Up-regulated
Sus_scrofa___ENSSSCG00000033766	5.09473	1.75558	14.2605	0.000616157	0.0123898	19	4	Up-regulated
Sus_scrofa___ENSSSCG00000012006	1.79361	5.81669	14.6936	0.00061656	0.0123898	19	4	Up-regulated
Sus_scrofa___TRNP1	4.33827	2.6771	14.65	0.000617127	0.0123907	19	4	Up-regulated
Sus_scrofa___OSGIN1	2.97446	3.53203	14.3459	0.000617443	0.0123907	19	4	Up-regulated
Sus_scrofa___ALKBH2	5.30379	1.90237	14.4131	0.000618836	0.0124102	19	4	Up-regulated
Sus_scrofa___ENSSSCG00000010203	0.922477	6.9395	14.6655	0.000621247	0.0124418	19	4	Up-regulated
Sus_scrofa___STYX	1.05309	5.3722	14.6634	0.000624029	0.0124874	19	4	Up-regulated
Sus_scrofa___S100A11	1.46973	4.78409	14.6508	0.000624371	0.0124874	19	4	Up-regulated
Sus_scrofa___LITAF	0.967643	7.44161	14.6431	0.000626007	0.0125117	19	4	Up-regulated
Sus_scrofa___GORASP2	0.972672	6.62037	14.6366	0.000627874	0.0125405	19	4	Up-regulated
Sus_scrofa___FOXRED1	1.33071	4.5185	14.6252	0.000629654	0.0125676	19	4	Up-regulated
Sus_scrofa___PGK1	2.17954	5.23781	14.593	0.000633358	0.0126245	19	4	Up-regulated
Sus_scrofa___PPWD1	0.985661	5.06596	14.6162	0.00063511	0.012651	19	4	Up-regulated
Sus_scrofa___JADE1	2.22037	6.95748	14.5561	0.000646638	0.0128288	19	4	Up-regulated
Sus_scrofa___MRPS36	2.33605	3.57983	14.2612	0.000649825	0.0128834	19	4	Up-regulated
Sus_scrofa___C1QTNF1	2.16797	4.74587	14.4668	0.000654995	0.0129685	19	4	Up-regulated
Sus_scrofa___TMED7	1.38276	4.74419	14.5132	0.0006562	0.0129787	19	4	Up-regulated
Sus_scrofa___PIM1	2.36826	4.44793	14.3967	0.000656384	0.0129787	19	4	Up-regulated
Sus_scrofa___UPRT	1.70014	3.74027	14.3796	0.000658629	0.0130144	19	4	Up-regulated
Sus_scrofa___INTU	1.27404	4.29808	14.483	0.000660818	0.0130316	19	4	Up-regulated
Sus_scrofa___FEM1C	1.53102	5.08776	14.4871	0.000662806	0.0130534	19	4	Up-regulated
Sus_scrofa___CHODL	1.35615	5.73288	14.469	0.000667878	0.0131184	19	4	Up-regulated
Sus_scrofa___SQSTM1	0.932596	6.41256	14.4576	0.000669213	0.0131359	19	4	Up-regulated
Sus_scrofa___TMEM243	1.93743	4.5157	14.3932	0.000672381	0.0131894	19	4	Up-regulated
Sus_scrofa___KDELR2	0.975423	6.30873	14.4319	0.000675491	0.0132241	19	4	Up-regulated
Sus_scrofa___P4HB	2.17104	4.90953	14.3817	0.000677976	0.013264	19	4	Up-regulated
Sus_scrofa___PTX3	4.23728	6.86334	14.3618	0.000680314	0.0132922	19	4	Up-regulated
Sus_scrofa___SNRNP40	0.905993	6.15377	14.4064	0.000681826	0.0133129	19	4	Up-regulated
Sus_scrofa___NACC1	3.20107	2.33697	14.0347	0.000689262	0.0134404	19	4	Up-regulated
Sus_scrofa___NUAK1	1.49457	8.77028	14.3627	0.000691333	0.0134719	19	4	Up-regulated
Sus_scrofa___SEC24D	0.935573	8.76175	14.3405	0.000696794	0.0135451	19	4	Up-regulated
Sus_scrofa___BTD	1.41878	4.62393	14.3386	0.000696919	0.0135451	19	4	Up-regulated
Sus_scrofa___NOD2	1.96242	3.80105	14.1737	0.000699026	0.0135683	19	4	Up-regulated
Sus_scrofa___ENSSSCG00000007203	0.88725	7.16678	14.3243	0.000701099	0.0135843	19	4	Up-regulated
Sus_scrofa___SZRD1	0.819128	6.06972	14.3266	0.000701559	0.0135843	19	4	Up-regulated
Sus_scrofa___ENSSSCG00000001516	5.25232	1.86426	14.021	0.000704645	0.0136088	19	4	Up-regulated
Sus_scrofa___ANKRD17	0.816938	8.85071	14.3067	0.00070525	0.0136088	19	4	Up-regulated
Sus_scrofa___CYB5B	1.02732	6.33984	14.2814	0.000712674	0.0137252	19	4	Up-regulated
Sus_scrofa___SMIM19	1.22774	4.93511	14.2663	0.000718265	0.0138239	19	4	Up-regulated
Sus_scrofa___HS6ST1	2.09934	5.73485	14.2433	0.000722237	0.0138664	19	4	Up-regulated
Sus_scrofa___TOMM20	1.10086	5.12774	14.2272	0.000728866	0.0139825	19	4	Up-regulated
Sus_scrofa___PPP4R2	0.844001	7.05104	14.1975	0.000733606	0.0140643	19	4	Up-regulated
Sus_scrofa___KCNK6	5.6067	2.06178	14.1398	0.000737837	0.0141363	19	4	Up-regulated
Sus_scrofa___UBAP1	1.06309	6.73623	14.1421	0.000748613	0.0143058	19	4	Up-regulated
Sus_scrofa___DGKI	4.36985	5.25582	13.8139	0.000752092	0.0143445	19	4	Up-regulated
Sus_scrofa___HAO2	1.59274	5.51534	14.1202	0.000756138	0.0144124	19	4	Up-regulated
Sus_scrofa___RDH14	2.53246	3.38755	13.7866	0.000758918	0.014456	19	4	Up-regulated
Sus_scrofa___SPIRE1	1.72895	5.88446	14.1072	0.000759568	0.0144591	19	4	Up-regulated
Sus_scrofa___DNAJC16	0.947486	5.56993	14.0973	0.00076272	0.0144864	19	4	Up-regulated
Sus_scrofa___YARS2	1.18411	5.07561	14.0948	0.000764014	0.0144879	19	4	Up-regulated
Sus_scrofa___BCL6	1.73682	5.43465	14.0292	0.000780534	0.0147728	19	4	Up-regulated
Sus_scrofa___DPY19L2	4.86559	1.60024	13.4563	0.000782138	0.0147937	19	4	Up-regulated
Sus_scrofa___PEDS1	1.39376	4.19301	13.9908	0.000783347	0.014798	19	4	Up-regulated
Sus_scrofa___SEC63	0.582687	7.28751	14.0072	0.000785266	0.014815	19	4	Up-regulated
Sus_scrofa___ASB1	1.28302	4.42397	13.9876	0.000790147	0.0148673	19	4	Up-regulated
Sus_scrofa___ENTPD4	1.1789	5.78377	13.9962	0.000790547	0.0148673	19	4	Up-regulated
Sus_scrofa___MEMO1	1.04301	7.42377	13.9792	0.000793252	0.0148931	19	4	Up-regulated
Sus_scrofa___WARS1	1.30462	5.14517	13.9849	0.00079434	0.0149008	19	4	Up-regulated
Sus_scrofa___MLLT11	4.04645	3.06984	13.8129	0.000795413	0.0149021	19	4	Up-regulated
Sus_scrofa___OAS2	3.69914	8.67072	13.9583	0.000800023	0.014958	19	4	Up-regulated
Sus_scrofa___TRIT1	0.843539	6.83074	13.9554	0.000800333	0.014958	19	4	Up-regulated
Sus_scrofa___GLS	0.766982	8.97411	13.9535	0.000800421	0.014958	19	4	Up-regulated
Sus_scrofa___MIDN	1.4226	4.19321	13.9147	0.000804524	0.0150213	19	4	Up-regulated
Sus_scrofa___SLC25A12	1.75968	5.80705	13.9383	0.000807034	0.0150531	19	4	Up-regulated
Sus_scrofa___LDLR	1.54843	6.31036	13.8989	0.000818032	0.0152199	19	4	Up-regulated
Sus_scrofa___SLC1A3	2.58912	7.20049	13.8955	0.00081883	0.0152252	19	4	Up-regulated
Sus_scrofa___ENSSSCG00000046704	2.97406	4.89431	13.7082	0.000834154	0.0154725	19	4	Up-regulated
Sus_scrofa___ENAH	1.95043	7.25233	13.822	0.000840104	0.0155524	19	4	Up-regulated
Sus_scrofa___CCNT1	1.60014	5.93507	13.8136	0.000844187	0.0155988	19	4	Up-regulated
Sus_scrofa___RBM15	1.0382	5.2571	13.8078	0.00084722	0.01563	19	4	Up-regulated
Sus_scrofa___ENSSSCG00000031037	2.94754	3.39997	13.5026	0.000847458	0.01563	19	4	Up-regulated
Sus_scrofa___ENSSSCG00000004441	1.09235	7.29146	13.7672	0.000856381	0.0157553	19	4	Up-regulated
Sus_scrofa___NFX1	0.706549	6.67075	13.7571	0.000859808	0.0157987	19	4	Up-regulated
Sus_scrofa___THBD	3.06809	2.28243	13.4021	0.00086138	0.015808	19	4	Up-regulated
Sus_scrofa___PBLD	1.48671	4.58539	13.7208	0.000868574	0.0159203	19	4	Up-regulated
Sus_scrofa___ATAD1	1.10461	7.84596	13.6913	0.000880062	0.0160811	19	4	Up-regulated
Sus_scrofa___OPA1	0.725436	6.30622	13.676	0.000885864	0.0161703	19	4	Up-regulated
Sus_scrofa___ENSSSCG00000040571	1.85464	4.86194	13.6585	0.000886037	0.0161703	19	4	Up-regulated
Sus_scrofa___PEAK1	1.09024	9.99101	13.6618	0.000889384	0.0162015	19	4	Up-regulated
Sus_scrofa___COG3	1.3133	6.69279	13.6585	0.000891421	0.0162087	19	4	Up-regulated
Sus_scrofa___PTPRU	2.52382	4.36321	13.5136	0.000892579	0.0162197	19	4	Up-regulated
Sus_scrofa___EGR1	2.26243	6.56342	13.6548	0.00089369	0.01623	19	4	Up-regulated
Sus_scrofa___ENSSSCG00000011559	1.20818	5.16353	13.6376	0.000900806	0.0163492	19	4	Up-regulated
Sus_scrofa___TMPPE	2.43338	3.14691	13.3159	0.000901676	0.0163549	19	4	Up-regulated
Sus_scrofa___ANGPTL4	2.19917	5.98075	13.6244	0.000903094	0.0163707	19	4	Up-regulated
Sus_scrofa___AHR	1.75117	5.84286	13.62	0.000905446	0.0163836	19	4	Up-regulated
Sus_scrofa___TRUB1	2.3253	4.81485	13.5485	0.000909184	0.0164408	19	4	Up-regulated
Sus_scrofa___ATP6V1C1	0.693629	6.56639	13.5894	0.000913808	0.0165076	19	4	Up-regulated
Sus_scrofa___AAR2	1.78097	3.95281	13.4942	0.000915931	0.0165225	19	4	Up-regulated
Sus_scrofa___RPN2	1.57515	5.31106	13.5842	0.000917193	0.0165251	19	4	Up-regulated
Sus_scrofa___ZNF786	1.59111	4.39846	13.5372	0.000923284	0.0165945	19	4	Up-regulated
Sus_scrofa___ENSSSCG00000009374	2.91794	3.39081	13.2435	0.000933587	0.0167409	19	4	Up-regulated
Sus_scrofa___TMEM101	0.889831	5.80366	13.535	0.000933693	0.0167409	19	4	Up-regulated
Sus_scrofa___PPP4R4	3.08406	3.24862	13.2671	0.000935104	0.0167561	19	4	Up-regulated
Sus_scrofa___CAVIN3	1.60913	4.34287	13.4887	0.000937935	0.0167966	19	4	Up-regulated
Sus_scrofa___SRM	3.7543	3.26525	13.3226	0.000939486	0.0167981	19	4	Up-regulated
Sus_scrofa___HSPA14	1.17748	4.85832	13.5175	0.000940854	0.0167981	19	4	Up-regulated
Sus_scrofa___TMCC1	0.729573	9.08147	13.5016	0.000942761	0.016822	19	4	Up-regulated
Sus_scrofa___LAP3	1.1393	6.81827	13.4994	0.000944246	0.0168369	19	4	Up-regulated
Sus_scrofa___USPL1	0.862744	6.03239	13.4932	0.000947407	0.01687	19	4	Up-regulated
Sus_scrofa___TENM1	2.89216	5.33709	13.4279	0.000947727	0.01687	19	4	Up-regulated
Sus_scrofa___UBAP2L	0.627231	7.14752	13.4796	0.000950647	0.0169017	19	4	Up-regulated
Sus_scrofa___AMOTL2	1.52473	6.76476	13.4541	0.000960381	0.0170448	19	4	Up-regulated
Sus_scrofa___ARL1	0.836715	5.30793	13.4603	0.000961001	0.0170448	19	4	Up-regulated
Sus_scrofa___SNRPG	1.25017	4.73427	13.4434	0.000965492	0.0171142	19	4	Up-regulated
Sus_scrofa___MAPK8	0.920799	7.16864	13.4052	0.000976856	0.017283	19	4	Up-regulated
Sus_scrofa___HSPA9	1.11148	5.09112	13.4133	0.000977757	0.017283	19	4	Up-regulated
Sus_scrofa___DAPK3	3.44663	4.53094	13.1406	0.000977931	0.017283	19	4	Up-regulated
Sus_scrofa___PRICKLE3	1.18225	4.70306	13.402	0.000980757	0.0173034	19	4	Up-regulated
Sus_scrofa___MORN4	3.06431	2.7138	13.1202	0.000990517	0.0174534	19	4	Up-regulated
Sus_scrofa___KCND3	2.89989	5.93979	13.3427	0.000993531	0.0174928	19	4	Up-regulated
Sus_scrofa___ADAM12	3.25992	8.84567	13.3567	0.000994526	0.0174928	19	4	Up-regulated
Sus_scrofa___HNRNPC	0.944784	7.12353	13.336	0.00100196	0.0176131	19	4	Up-regulated
Sus_scrofa___SRSF1	0.943863	5.89137	13.3325	0.00100512	0.017653	19	4	Up-regulated
Sus_scrofa___ATAD3A	1.86733	3.71738	13.1926	0.00100556	0.017653	19	4	Up-regulated
Sus_scrofa___MYO1H	2.23676	4.17754	13.1869	0.00101227	0.0177521	19	4	Up-regulated
Sus_scrofa___S1PR2	2.02839	4.47179	13.2443	0.00101531	0.0177844	19	4	Up-regulated
Sus_scrofa___ENSSSCG00000033750	3.08563	3.99071	13.0137	0.00101914	0.017841	19	4	Up-regulated
Sus_scrofa___MRPL12	1.02105	5.23962	13.2914	0.00102226	0.0178745	19	4	Up-regulated
Sus_scrofa___THSD4	2.37607	8.4187	13.2743	0.00102473	0.0179023	19	4	Up-regulated
Sus_scrofa___C2orf76	1.05543	4.66186	13.2799	0.00102657	0.0179181	19	4	Up-regulated
Sus_scrofa___IMMP1L	1.15746	6.04363	13.2676	0.00102911	0.0179307	19	4	Up-regulated
Sus_scrofa___RAI14	1.93106	9.28303	13.2539	0.0010322	0.0179739	19	4	Up-regulated
Sus_scrofa___STX11	1.38161	4.88501	13.2412	0.00103916	0.0180796	19	4	Up-regulated
Sus_scrofa___EGLN3	4.60549	4.34647	13.0215	0.00104009	0.0180796	19	4	Up-regulated
Sus_scrofa___HABP4	2.16367	5.56676	13.2289	0.00104104	0.0180853	19	4	Up-regulated
Sus_scrofa___ERLEC1	0.879507	6.05293	13.217	0.00104807	0.0181812	19	4	Up-regulated
Sus_scrofa___VDR	3.28616	5.71292	13.1525	0.0010484	0.0181812	19	4	Up-regulated
Sus_scrofa___TRAF3IP2	0.762454	7.42509	13.2097	0.00104926	0.0181856	19	4	Up-regulated
Sus_scrofa___B3GALNT2	1.51255	5.14989	13.1989	0.00105568	0.018286	19	4	Up-regulated
Sus_scrofa___PSMD5	1.17111	4.73473	13.1987	0.00105679	0.0182946	19	4	Up-regulated
Sus_scrofa___FEZ2	0.849051	5.82487	13.1854	0.0010609	0.0183444	19	4	Up-regulated
Sus_scrofa___SLC35A1	0.930392	6.01618	13.1733	0.00106519	0.0183971	19	4	Up-regulated
Sus_scrofa___DNA2	2.21623	4.23934	13.0381	0.00107672	0.0185615	19	4	Up-regulated
Sus_scrofa___RSC1A1	0.781225	6.13033	13.1417	0.00107722	0.0185615	19	4	Up-regulated
Sus_scrofa___SDHD	3.82809	3.35688	12.9061	0.00109956	0.0189025	19	4	Up-regulated
Sus_scrofa___UTP15	1.09462	4.61838	13.0888	0.00110062	0.0189098	19	4	Up-regulated
Sus_scrofa___PSMA6	0.662381	6.91638	13.0497	0.00111318	0.0190706	19	4	Up-regulated
Sus_scrofa___MRM3	2.16312	3.21019	12.7791	0.00111321	0.0190706	19	4	Up-regulated
Sus_scrofa___MLKL	0.815967	5.22493	13.047	0.00111849	0.019136	19	4	Up-regulated
Sus_scrofa___ZCCHC4	1.23654	4.09931	13.0217	0.00111896	0.019136	19	4	Up-regulated
Sus_scrofa___MTRES1	2.69838	2.85749	12.7617	0.00112266	0.0191661	19	4	Up-regulated
Sus_scrofa___WSCD2	3.84509	5.12391	12.8044	0.00112369	0.0191726	19	4	Up-regulated
Sus_scrofa___TSKU	1.31782	4.58063	13.0182	0.00112645	0.0192086	19	4	Up-regulated
Sus_scrofa___TKT	1.59692	4.66839	12.9802	0.00113864	0.0193935	19	4	Up-regulated
Sus_scrofa___CSDE1	0.60906	7.41348	12.9787	0.00114249	0.0194374	19	4	Up-regulated
Sus_scrofa___AHCYL1	0.679622	6.35312	12.9748	0.00114504	0.0194696	19	4	Up-regulated
Sus_scrofa___ENSSSCG00000014997	1.10565	6.85308	12.9573	0.00115212	0.0195562	19	4	Up-regulated
Sus_scrofa___SLC35D1	2.34709	4.34531	12.8519	0.0011543	0.0195754	19	4	Up-regulated
Sus_scrofa___YIPF6	1.00162	4.97972	12.9531	0.00115827	0.019627	19	4	Up-regulated
Sus_scrofa___POLE4	1.1323	4.66957	12.9374	0.00116375	0.0197085	19	4	Up-regulated
Sus_scrofa___PDZD9	1.73491	3.78516	12.821	0.00116758	0.0197209	19	4	Up-regulated
Sus_scrofa___DUSP5	3.55084	3.69787	12.6829	0.00117055	0.0197559	19	4	Up-regulated
Sus_scrofa___POLR1C	1.31834	5.21196	12.9174	0.00117233	0.0197747	19	4	Up-regulated
Sus_scrofa___SYPL2	1.42946	4.24814	12.8828	0.00117559	0.0198185	19	4	Up-regulated
Sus_scrofa___TJP1	1.045	7.93056	12.8977	0.00117718	0.019834	19	4	Up-regulated
Sus_scrofa___ENSSSCG00000033721	1.82528	3.40941	12.705	0.0011795	0.0198617	19	4	Up-regulated
Sus_scrofa___PYCR3	3.32582	2.45209	12.6434	0.00118171	0.0198877	19	4	Up-regulated
Sus_scrofa___ENSSSCG00000004830	1.6714	8.56562	12.8703	0.00118918	0.019939	19	4	Up-regulated
Sus_scrofa___ROR1	2.1717	10.1192	12.8694	0.00118945	0.019939	19	4	Up-regulated
Sus_scrofa___WIPI1	0.969628	6.76043	12.8675	0.00119107	0.019939	19	4	Up-regulated
Sus_scrofa___CYP26B1	6.20696	2.54354	13.0724	0.00119202	0.019939	19	4	Up-regulated
Sus_scrofa___ACAD10	1.65532	4.9517	12.8626	0.00119215	0.019939	19	4	Up-regulated
Sus_scrofa___ZHX1	1.21693	4.96713	12.8722	0.0011924	0.019939	19	4	Up-regulated
Sus_scrofa___OGFOD1	1.04923	4.85959	12.8733	0.00119284	0.019939	19	4	Up-regulated
Sus_scrofa___ZNF527	1.30031	4.04931	12.828	0.0011985	0.0200223	19	4	Up-regulated
Sus_scrofa___ENSSSCG00000031462	1.32266	7.9895	12.8252	0.00120929	0.0201574	19	4	Up-regulated
Sus_scrofa___COL8A1	2.06682	11.2614	12.8248	0.00120931	0.0201574	19	4	Up-regulated
Sus_scrofa___PCLO	2.63693	2.0009	12.3589	0.00121019	0.0201589	19	4	Up-regulated
Sus_scrofa___USP25	0.80401	8.46221	12.8099	0.00121607	0.020236	19	4	Up-regulated
Sus_scrofa___PIGK	1.25563	5.07807	12.8148	0.00121796	0.0202561	19	4	Up-regulated
Sus_scrofa___EIF4E	1.57383	6.11427	12.7999	0.00122329	0.020326	19	4	Up-regulated
Sus_scrofa___ENSSSCG00000049011	3.9027	2.27803	12.6516	0.00122418	0.020326	19	4	Up-regulated
Sus_scrofa___RPL22L1	1.76988	4.37488	12.7319	0.00123624	0.0205025	19	4	Up-regulated
Sus_scrofa___ZNF697	2.05512	5.65847	12.752	0.00124368	0.0205797	19	4	Up-regulated
Sus_scrofa___ACKR4	2.22181	4.74286	12.6981	0.00124749	0.0206313	19	4	Up-regulated
Sus_scrofa___VDAC3	2.0914	4.18696	12.6386	0.00125519	0.0207009	19	4	Up-regulated
Sus_scrofa___BCO1	4.10349	3.02611	12.5931	0.00125678	0.0207156	19	4	Up-regulated
Sus_scrofa___G3BP2	1.48289	6.13523	12.7169	0.00126149	0.0207816	19	4	Up-regulated
Sus_scrofa___RAB18	0.940764	6.65079	12.7112	0.00126244	0.0207857	19	4	Up-regulated
Sus_scrofa___RETREG3	1.30436	5.62672	12.7107	0.00126545	0.0207993	19	4	Up-regulated
Sus_scrofa___POLR3H	1.31784	4.26083	12.6929	0.00126579	0.0207993	19	4	Up-regulated
Sus_scrofa___ZNF784	2.76249	2.94956	12.4543	0.00126642	0.0207993	19	4	Up-regulated
Sus_scrofa___RUNX1	1.93291	8.96912	12.6926	0.00127034	0.0208231	19	4	Up-regulated
Sus_scrofa___MAGT1	0.668893	7.02848	12.6798	0.00127681	0.020883	19	4	Up-regulated
Sus_scrofa___AKR1B1	0.774509	6.74724	12.6719	0.00128083	0.020892	19	4	Up-regulated
Sus_scrofa___CCDC126	1.52131	5.19486	12.6763	0.00128089	0.020892	19	4	Up-regulated
Sus_scrofa___RRS1	2.74236	2.41276	12.379	0.00128202	0.020899	19	4	Up-regulated
Sus_scrofa___TXNRD2	1.70936	3.36725	12.4816	0.00129217	0.0210303	19	4	Up-regulated
Sus_scrofa___FRA10AC1	0.931786	4.95218	12.6556	0.00129381	0.0210303	19	4	Up-regulated
Sus_scrofa___ADAR	1.27778	6.13415	12.6458	0.00129512	0.0210303	19	4	Up-regulated
Sus_scrofa___MICALL2	1.72146	4.03465	12.5736	0.00129808	0.0210565	19	4	Up-regulated
Sus_scrofa___YTHDF3	0.811843	6.17467	12.6187	0.00130756	0.021187	19	4	Up-regulated
Sus_scrofa___TRIM44	0.778455	7.65302	12.6127	0.00130891	0.0211916	19	4	Up-regulated
Sus_scrofa___USF3	0.918187	5.90143	12.617	0.00130927	0.0211916	19	4	Up-regulated
Sus_scrofa___NDUFS1	1.15766	5.70131	12.6146	0.00131134	0.0212102	19	4	Up-regulated
Sus_scrofa___FAM13A	1.05606	9.15518	12.6014	0.00131425	0.021235	19	4	Up-regulated
Sus_scrofa___ENSSSCG00000035577	2.92561	3.18905	12.3646	0.00131482	0.021235	19	4	Up-regulated
Sus_scrofa___MPHOSPH10	1.11607	5.00002	12.6053	0.00131744	0.0212656	19	4	Up-regulated
Sus_scrofa___DBF4	0.827365	5.37122	12.5964	0.00132136	0.0212973	19	4	Up-regulated
Sus_scrofa___MON2	0.629526	8.33373	12.5867	0.00132156	0.0212973	19	4	Up-regulated
Sus_scrofa___TTC23	2.69467	4.25606	12.4079	0.00133018	0.0214081	19	4	Up-regulated
Sus_scrofa___TIMM44	2.17345	3.93465	12.4361	0.00133129	0.0214081	19	4	Up-regulated
Sus_scrofa___SNIP1	1.3116	3.73641	12.5085	0.0013342	0.0214427	19	4	Up-regulated
Sus_scrofa___NUDT15	3.47422	1.94756	12.2342	0.00133876	0.0215043	19	4	Up-regulated
Sus_scrofa___VAPA	0.714802	7.66636	12.542	0.00134393	0.0215757	19	4	Up-regulated
Sus_scrofa___SLC25A37	1.04128	6.3233	12.5388	0.00134707	0.0216145	19	4	Up-regulated
Sus_scrofa___METTL1	2.29598	3.05797	12.2448	0.00135847	0.0217738	19	4	Up-regulated
Sus_scrofa___NSMCE1	1.43179	5.18082	12.5122	0.00136246	0.0218259	19	4	Up-regulated
Sus_scrofa___PRMT5	1.53326	3.99671	12.455	0.00136689	0.021885	19	4	Up-regulated
Sus_scrofa___PANK1	2.85334	4.08438	12.2784	0.00137227	0.0219474	19	4	Up-regulated
Sus_scrofa___MED20	1.55784	4.21002	12.4344	0.00138394	0.0220453	19	4	Up-regulated
Sus_scrofa___ENSSSCG00000011307	3.35475	1.88799	12.0854	0.00138792	0.0220904	19	4	Up-regulated
Sus_scrofa___FUT11	2.86241	3.12665	12.197	0.0014008	0.0222595	19	4	Up-regulated
Sus_scrofa___TMEM69	3.09989	2.28303	12.1236	0.00141062	0.0223676	19	4	Up-regulated
Sus_scrofa___CISD2	2.11114	3.12999	12.1562	0.00141343	0.0224002	19	4	Up-regulated
Sus_scrofa___SHQ1	0.955892	6.34588	12.4018	0.00141795	0.0224508	19	4	Up-regulated
Sus_scrofa___ZNF576	4.85928	1.56718	11.945	0.00141815	0.0224508	19	4	Up-regulated
Sus_scrofa___ANKRD10	0.832121	8.21065	12.3948	0.00142012	0.0224701	19	4	Up-regulated
Sus_scrofa___PPM1A	0.89486	6.42959	12.3884	0.00142483	0.0225326	19	4	Up-regulated
Sus_scrofa___SCFD2	0.795302	8.86661	12.3536	0.00144224	0.0227533	19	4	Up-regulated
Sus_scrofa___ENSSSCG00000029449	5.64739	4.9701	12.183	0.0014434	0.0227534	19	4	Up-regulated
Sus_scrofa___APBA3	1.81153	3.498	12.1912	0.00144819	0.0228166	19	4	Up-regulated
Sus_scrofa___DDX21	1.41903	6.45965	12.3417	0.00145068	0.0228438	19	4	Up-regulated
Sus_scrofa___EIF2D	1.53758	3.99321	12.2849	0.00145662	0.0229252	19	4	Up-regulated
Sus_scrofa___DCAF13	0.85672	4.74736	12.3368	0.00145857	0.0229436	19	4	Up-regulated
Sus_scrofa___COX5A	1.69729	4.46502	12.2951	0.00146295	0.0230003	19	4	Up-regulated
Sus_scrofa___RTN2	1.84362	4.2186	12.2403	0.00147659	0.0231533	19	4	Up-regulated
Sus_scrofa___DMAC2	1.27502	4.59018	12.2926	0.00147768	0.0231581	19	4	Up-regulated
Sus_scrofa___ENSSSCG00000016737	0.977135	5.59716	12.2876	0.00148265	0.0232115	19	4	Up-regulated
Sus_scrofa___MARK1	1.24651	6.59595	12.2807	0.0014839	0.0232123	19	4	Up-regulated
Sus_scrofa___BCAR1	1.40795	4.77512	12.2799	0.00148427	0.0232123	19	4	Up-regulated
Sus_scrofa___NDUFA9	1.87739	4.02801	12.2028	0.00148587	0.023225	19	4	Up-regulated
Sus_scrofa___TMEM19	0.716491	6.47522	12.2729	0.00148792	0.0232449	19	4	Up-regulated
Sus_scrofa___ENSSSCG00000033987	0.729709	7.20536	12.262	0.00149328	0.0233119	19	4	Up-regulated
Sus_scrofa___EMC3	0.852089	5.65865	12.2617	0.00149683	0.0233472	19	4	Up-regulated
Sus_scrofa___LRRC58	1.38669	5.13456	12.2594	0.00149838	0.023359	19	4	Up-regulated
Sus_scrofa___RBBP9	1.54579	3.13797	12.0708	0.00149972	0.0233676	19	4	Up-regulated
Sus_scrofa___ENSSSCG00000005453	1.08755	5.30451	12.2571	0.00150084	0.0233727	19	4	Up-regulated
Sus_scrofa___GSPT1	0.814091	6.46115	12.2247	0.00151536	0.0235247	19	4	Up-regulated
Sus_scrofa___PKM	2.14124	5.32402	12.2074	0.00152011	0.0235786	19	4	Up-regulated
Sus_scrofa___MANF	1.66097	3.92883	12.1493	0.00152043	0.0235786	19	4	Up-regulated
Sus_scrofa___ACOT4	1.04416	5.55036	12.1975	0.00153412	0.0237412	19	4	Up-regulated
Sus_scrofa___DSCAM	1.71353	3.51242	12.0512	0.00153599	0.0237578	19	4	Up-regulated
Sus_scrofa___PRDX4	1.18509	4.8809	12.1606	0.0015562	0.0240201	19	4	Up-regulated
Sus_scrofa___SAR1A	1.08672	4.58383	12.1583	0.0015575	0.0240277	19	4	Up-regulated
Sus_scrofa___ENSSSCG00000012262	0.639225	8.35675	12.1352	0.00156626	0.0241355	19	4	Up-regulated
Sus_scrofa___GCLM	2.023	4.74559	12.1057	0.00156868	0.0241373	19	4	Up-regulated
Sus_scrofa___ENSSSCG00000038633	1.37146	4.78688	12.1261	0.00157385	0.0241577	19	4	Up-regulated
Sus_scrofa___RASL11B	3.14466	3.89145	11.8818	0.00157434	0.0241577	19	4	Up-regulated
Sus_scrofa___NR6A1	1.00555	7.0653	12.1218	0.00157477	0.0241577	19	4	Up-regulated
Sus_scrofa___INTS7	0.94416	5.09046	12.1311	0.0015749	0.0241577	19	4	Up-regulated
Sus_scrofa___C19orf53	1.1693	3.86626	12.0699	0.00159166	0.0243461	19	4	Up-regulated
Sus_scrofa___EIF3H	0.94245	7.07657	12.0923	0.00159242	0.0243461	19	4	Up-regulated
Sus_scrofa___KLHL26	1.53775	4.74748	12.0746	0.00160146	0.0244637	19	4	Up-regulated
Sus_scrofa___S100A6	1.3773	5.11901	12.0777	0.0016049	0.0245037	19	4	Up-regulated
Sus_scrofa___ENSSSCG00000048543	3.24721	2.87869	11.8792	0.00160997	0.0245557	19	4	Up-regulated
Sus_scrofa___ENSSSCG00000032073	1.44374	3.8558	12.0133	0.00161227	0.0245717	19	4	Up-regulated
Sus_scrofa___ENSSSCG00000048052	3.35277	1.90161	11.7098	0.00161267	0.0245717	19	4	Up-regulated
Sus_scrofa___CLTA	0.980485	6.42056	12.0494	0.00161959	0.0246351	19	4	Up-regulated
Sus_scrofa___ENSSSCG00000007188	1.33401	6.13052	12.0506	0.00162016	0.0246351	19	4	Up-regulated
Sus_scrofa___FAF2	0.676949	6.22964	12.0287	0.0016325	0.0247591	19	4	Up-regulated
Sus_scrofa___ENSSSCG00000022925	1.86536	7.10869	12.0207	0.00163714	0.0247914	19	4	Up-regulated
Sus_scrofa___SLC16A3	4.4696	3.43606	11.9045	0.00164425	0.0248736	19	4	Up-regulated
Sus_scrofa___FOS	3.42021	6.37195	11.9798	0.00165104	0.0249255	19	4	Up-regulated
Sus_scrofa___PLGRKT	1.59957	4.77929	11.9584	0.00167282	0.025181	19	4	Up-regulated
Sus_scrofa___ANXA5	0.930521	7.94755	11.9532	0.00167838	0.0252383	19	4	Up-regulated
Sus_scrofa___RRP12	2.55028	3.61901	11.7388	0.00167948	0.0252391	19	4	Up-regulated
Sus_scrofa___ENSSSCG00000037445	1.12469	4.86692	11.9576	0.00168129	0.0252434	19	4	Up-regulated
Sus_scrofa___TCERG1	0.646355	7.40731	11.9473	0.00168233	0.0252434	19	4	Up-regulated
Sus_scrofa___TOB2	3.23065	4.37234	11.7412	0.00168445	0.0252625	19	4	Up-regulated
Sus_scrofa___EPM2AIP1	1.34789	5.19228	11.9489	0.00168579	0.0252698	19	4	Up-regulated
Sus_scrofa___POLR3A	0.900022	6.01989	11.9422	0.001688	0.0252853	19	4	Up-regulated
Sus_scrofa___ZNF570	0.957096	4.13412	11.9227	0.0016998	0.0253899	19	4	Up-regulated
Sus_scrofa___GSS	1.59755	3.57789	11.8016	0.00171253	0.025567	19	4	Up-regulated
Sus_scrofa___PPP2R5E	0.686583	8.02031	11.8827	0.00172407	0.0257005	19	4	Up-regulated
Sus_scrofa___HACD1	2.90164	4.29202	11.7052	0.00173084	0.0257755	19	4	Up-regulated
Sus_scrofa___TCAIM	1.16379	5.17136	11.8642	0.00174198	0.0259153	19	4	Up-regulated
Sus_scrofa___ZNF771	1.87745	3.33529	11.6753	0.00174652	0.0259698	19	4	Up-regulated
Sus_scrofa___UBA6	0.77642	6.15655	11.8199	0.00176795	0.026249	19	4	Up-regulated
Sus_scrofa___ENSSSCG00000010161	3.50856	1.9724	11.5418	0.00177075	0.0262642	19	4	Up-regulated
Sus_scrofa___IL6R	2.22307	5.44968	11.8042	0.00177271	0.0262802	19	4	Up-regulated
Sus_scrofa___CCDC134	1.80268	3.17934	11.5984	0.00178396	0.0264205	19	4	Up-regulated
Sus_scrofa___TMPRSS9	2.46327	3.20376	11.5527	0.00178697	0.0264386	19	4	Up-regulated
Sus_scrofa___UQCRC2	1.32749	5.46522	11.7808	0.00179738	0.0265528	19	4	Up-regulated
Sus_scrofa___OSBPL5	1.22363	5.84744	11.7562	0.00181332	0.0267483	19	4	Up-regulated
Sus_scrofa___EXOSC3	3.37445	1.89665	11.4172	0.00181949	0.0267992	19	4	Up-regulated
Sus_scrofa___ENOX2	1.00967	5.88787	11.7431	0.00182195	0.0268221	19	4	Up-regulated
Sus_scrofa___POLD3	0.788731	5.33872	11.7433	0.00182422	0.026836	19	4	Up-regulated
Sus_scrofa___TOMM40	2.41156	3.30994	11.5078	0.00182561	0.026836	19	4	Up-regulated
Sus_scrofa___UBE2K	0.671523	8.06779	11.7291	0.00182831	0.0268623	19	4	Up-regulated
Sus_scrofa___NUP54	1.5945	4.31805	11.7042	0.00183185	0.0268804	19	4	Up-regulated
Sus_scrofa___RYK	0.650886	7.63666	11.7232	0.00183252	0.0268804	19	4	Up-regulated
Sus_scrofa___GAREM1	1.70621	7.65395	11.7229	0.00183316	0.0268804	19	4	Up-regulated
Sus_scrofa___SCAP	1.23381	5.31306	11.7002	0.00185418	0.0271459	19	4	Up-regulated
Sus_scrofa___SNED1	2.45819	8.50094	11.6907	0.0018558	0.0271459	19	4	Up-regulated
Sus_scrofa___LIMD1	0.885651	6.43505	11.6922	0.00185585	0.0271459	19	4	Up-regulated
Sus_scrofa___PHLDA1	6.2133	2.5545	11.8585	0.00186166	0.0272173	19	4	Up-regulated
Sus_scrofa___PREP	0.636625	6.8864	11.6669	0.00187303	0.0273431	19	4	Up-regulated
Sus_scrofa___PNO1	1.17891	4.0916	11.6508	0.00187793	0.0274012	19	4	Up-regulated
Sus_scrofa___ENSSSCG00000016828	1.17517	4.57716	11.65	0.00188862	0.0275435	19	4	Up-regulated
Sus_scrofa___PPIB	1.69021	4.99718	11.6386	0.00189197	0.0275771	19	4	Up-regulated
Sus_scrofa___IPO11	0.679515	7.23351	11.6392	0.00189278	0.0275771	19	4	Up-regulated
Sus_scrofa___TMEM108	1.27567	3.63798	11.584	0.00189442	0.0275873	19	4	Up-regulated
Sus_scrofa___NFKBIB	2.10855	3.29381	11.4254	0.00189865	0.0276354	19	4	Up-regulated
Sus_scrofa___KCNMA1	4.46156	8.0284	11.6112	0.00191328	0.0278346	19	4	Up-regulated
Sus_scrofa___CBLB	1.25424	9.93041	11.6091	0.0019144	0.0278372	19	4	Up-regulated
Sus_scrofa___FBXO28	0.758251	6.21335	11.6024	0.0019214	0.0278754	19	4	Up-regulated
Sus_scrofa___CEP57	0.971282	5.517	11.6055	0.00192226	0.0278754	19	4	Up-regulated
Sus_scrofa___NCBP1	1.84076	5.86463	11.6032	0.00192267	0.0278754	19	4	Up-regulated
Sus_scrofa___ETV6	0.875826	9.32853	11.591	0.00192775	0.0279303	19	4	Up-regulated
Sus_scrofa___MDN1	1.0804	7.08876	11.5912	0.00192834	0.0279303	19	4	Up-regulated
Sus_scrofa___YBEY	2.30824	2.33727	11.2955	0.00193125	0.0279458	19	4	Up-regulated
Sus_scrofa___VGLL3	1.94997	8.44394	11.5866	0.0019313	0.0279458	19	4	Up-regulated
Sus_scrofa___CHORDC1	0.881309	6.31953	11.5607	0.00195232	0.0281182	19	4	Up-regulated
Sus_scrofa___PRR16	2.96273	7.2024	11.5619	0.0019527	0.0281182	19	4	Up-regulated
Sus_scrofa___RPSA	1.15228	6.5653	11.5555	0.001956	0.0281519	19	4	Up-regulated
Sus_scrofa___ENSSSCG00000048081	4.84768	1.572	11.1359	0.00196551	0.0282751	19	4	Up-regulated
Sus_scrofa___TM9SF4	0.791545	6.33843	11.5366	0.00197043	0.0283257	19	4	Up-regulated
Sus_scrofa___ASPH	0.996746	7.99463	11.5325	0.0019719	0.0283257	19	4	Up-regulated
Sus_scrofa___THOC7	1.03156	5.53473	11.5334	0.00197628	0.0283629	19	4	Up-regulated
Sus_scrofa___RAB3GAP1	1.51676	5.80837	11.5263	0.00198091	0.0284049	19	4	Up-regulated
Sus_scrofa___HSPH1	1.48266	5.52636	11.5172	0.00198824	0.0284638	19	4	Up-regulated
Sus_scrofa___ENSSSCG00000015691	2.97748	2.17784	11.2046	0.00200711	0.0287062	19	4	Up-regulated
Sus_scrofa___AMD1	2.70275	4.6347	11.3952	0.00200948	0.028723	19	4	Up-regulated
Sus_scrofa___CLIP1	1.47042	8.28687	11.4825	0.00201022	0.028723	19	4	Up-regulated
Sus_scrofa___GTF2F2	0.849895	7.43501	11.48	0.00201236	0.0287258	19	4	Up-regulated
Sus_scrofa___XKR6	1.06494	6.51015	11.4731	0.00201916	0.0287813	19	4	Up-regulated
Sus_scrofa___SRSF12	2.16633	3.63644	11.3105	0.00202422	0.0288395	19	4	Up-regulated
Sus_scrofa___BCL7A	1.61764	3.78016	11.3868	0.00203131	0.0289128	19	4	Up-regulated
Sus_scrofa___PLAUR	1.15317	5.75654	11.4552	0.00203598	0.0289386	19	4	Up-regulated
Sus_scrofa___HMBS	1.54077	2.72789	11.1843	0.00204224	0.028992	19	4	Up-regulated
Sus_scrofa___GDF9	2.44978	2.44085	11.1854	0.00204275	0.028992	19	4	Up-regulated
Sus_scrofa___PNPLA3	2.65841	3.32426	11.2168	0.00204713	0.0290127	19	4	Up-regulated
Sus_scrofa___CEBPG	0.812533	5.59809	11.4408	0.00204758	0.0290127	19	4	Up-regulated
Sus_scrofa___NYX	2.31767	2.60711	11.1834	0.00204806	0.0290127	19	4	Up-regulated
Sus_scrofa___CAPZA1	0.589358	7.41884	11.4344	0.00204813	0.0290127	19	4	Up-regulated
Sus_scrofa___EPHA7	3.03176	7.19913	11.4348	0.00205073	0.0290271	19	4	Up-regulated
Sus_scrofa___TMEM33	1.05605	5.03989	11.438	0.00205208	0.0290271	19	4	Up-regulated
Sus_scrofa___CTNNA1	0.586071	8.59346	11.4252	0.00205511	0.0290561	19	4	Up-regulated
Sus_scrofa___PTGIS	0.817663	9.49525	11.4028	0.00207298	0.0292807	19	4	Up-regulated
Sus_scrofa___QRICH1	0.546421	7.36284	11.3834	0.00208889	0.0294633	19	4	Up-regulated
Sus_scrofa___NIPA2	0.818831	5.46415	11.3709	0.00210451	0.0296412	19	4	Up-regulated
Sus_scrofa___PTAR1	0.769029	6.24158	11.359	0.00211053	0.0296974	19	4	Up-regulated
Sus_scrofa___IFT20	1.37271	3.65177	11.2999	0.00211151	0.0296974	19	4	Up-regulated
Sus_scrofa___PHC2	0.890831	7.01265	11.3474	0.00211868	0.0297701	19	4	Up-regulated
Sus_scrofa___DOLPP1	2.71286	2.43215	11.0986	0.00212817	0.029862	19	4	Up-regulated
Papio_anubis_ENSPANG00000009679	4.29922	1.31471	10.695	0.00213407	0.0299295	19	4	Up-regulated
Sus_scrofa___ENSSSCG00000011081	2.33783	2.65091	11.0691	0.00215066	0.0300964	19	4	Up-regulated
Sus_scrofa___YRDC	1.08312	3.64799	11.2669	0.00215822	0.0301577	19	4	Up-regulated
Sus_scrofa___ASCC2	0.891318	5.02622	11.3083	0.00215848	0.0301577	19	4	Up-regulated
Sus_scrofa___C12orf73	1.26649	4.34688	11.2813	0.00217021	0.0302787	19	4	Up-regulated
Sus_scrofa___NCSTN	1.28089	4.23731	11.2669	0.00217927	0.0303908	19	4	Up-regulated
Sus_scrofa___ODR4	0.570297	6.83821	11.2723	0.00218133	0.0304052	19	4	Up-regulated
Sus_scrofa___FAM104A	0.970651	4.2071	11.2669	0.0021884	0.0304751	19	4	Up-regulated
Sus_scrofa___ABCB6	3.13007	2.28996	11.0222	0.00219541	0.0305582	19	4	Up-regulated
Sus_scrofa___ENSSSCG00000042694	3.53593	3.33771	11.0992	0.00219648	0.0305588	19	4	Up-regulated
Sus_scrofa___ORC3	0.715562	6.5282	11.2408	0.00220873	0.0307004	19	4	Up-regulated
Sus_scrofa___PTGIR	3.13617	1.76891	10.8173	0.00222976	0.0309532	19	4	Up-regulated
Sus_scrofa___ADIPOR2	1.9194	4.69461	11.1951	0.00223088	0.0309532	19	4	Up-regulated
Sus_scrofa___RNF126	0.850355	4.42235	11.2238	0.00223109	0.0309532	19	4	Up-regulated
Sus_scrofa___CCSER2	0.936168	7.30874	11.2001	0.00224312	0.0310909	19	4	Up-regulated
Sus_scrofa___PIGU	0.771012	5.84207	11.1983	0.00224805	0.0311446	19	4	Up-regulated
Sus_scrofa___RMI1	2.21665	3.30594	10.9926	0.00224932	0.0311477	19	4	Up-regulated
Sus_scrofa___RTKN2	1.82862	4.37912	11.1437	0.00226483	0.0313165	19	4	Up-regulated
Sus_scrofa___ATG5	0.569732	6.67795	11.1733	0.00226716	0.0313215	19	4	Up-regulated
Sus_scrofa___FAM78B	3.16255	6.57636	11.1647	0.00227217	0.0313615	19	4	Up-regulated
Sus_scrofa___ZNF827	1.27106	6.82399	11.1643	0.00227556	0.0313807	19	4	Up-regulated
Sus_scrofa___SLCO4A1	5.94245	2.32992	11.2534	0.00227686	0.0313807	19	4	Up-regulated
Sus_scrofa___HM13	0.674194	6.2775	11.1624	0.0022778	0.0313807	19	4	Up-regulated
Sus_scrofa___RALY	0.617295	7.71495	11.1572	0.0022806	0.0313956	19	4	Up-regulated
Sus_scrofa___PTPN3	0.860904	6.39309	11.1521	0.0022869	0.0314476	19	4	Up-regulated
Sus_scrofa___TTLL5	0.553703	7.39299	11.1479	0.00228904	0.0314624	19	4	Up-regulated
Sus_scrofa___TXNRD1	1.31654	7.33912	11.1463	0.0022908	0.031472	19	4	Up-regulated
Sus_scrofa___EIF3A	0.720789	6.75027	11.1441	0.00229308	0.0314886	19	4	Up-regulated
Sus_scrofa___SYT14	4.13718	2.45614	11.0812	0.00229701	0.0315272	19	4	Up-regulated
Sus_scrofa___NLE1	1.71546	3.88696	11.0645	0.00230887	0.0316615	19	4	Up-regulated
Sus_scrofa___HTR2C	2.26137	2.58289	10.8652	0.0023229	0.0318244	19	4	Up-regulated
Sus_scrofa___ANKS6	1.03385	5.57463	11.1111	0.00232749	0.0318578	19	4	Up-regulated
Sus_scrofa___ECSIT	1.5944	3.42916	10.9973	0.00232903	0.0318641	19	4	Up-regulated
Sus_scrofa___ACLY	0.867125	5.88666	11.1006	0.00233525	0.0318993	19	4	Up-regulated
Sus_scrofa___SLC15A1	2.78573	1.54237	10.5631	0.00233591	0.0318993	19	4	Up-regulated
Sus_scrofa___COMMD2	1.5715	3.00822	10.8986	0.00234878	0.0320161	19	4	Up-regulated
Sus_scrofa___CCT4	0.853126	5.85419	11.0672	0.00236605	0.03218	19	4	Up-regulated
Sus_scrofa___SLC4A7	1.2309	7.97984	11.0625	0.00236654	0.03218	19	4	Up-regulated
Sus_scrofa___PXK	0.850832	7.36199	11.0619	0.00236733	0.03218	19	4	Up-regulated
Sus_scrofa___EIF2S1	0.76354	6.00382	11.0554	0.00237611	0.0322845	19	4	Up-regulated
Sus_scrofa___GOLPH3	0.722777	6.44927	11.0457	0.00238348	0.0323259	19	4	Up-regulated
Sus_scrofa___TWNK	1.59636	2.80369	10.8161	0.00238461	0.0323259	19	4	Up-regulated
Sus_scrofa___THBS1	2.60624	10.1769	11.0299	0.0023967	0.0324453	19	4	Up-regulated
Sus_scrofa___ISG15	5.43087	6.14692	10.7922	0.00242102	0.0326972	19	4	Up-regulated
Sus_scrofa___USP9X	0.713919	8.11316	11.0028	0.00242229	0.0326972	19	4	Up-regulated
Sus_scrofa___PSMA5	1.14532	5.10926	11.0067	0.00242587	0.0327206	19	4	Up-regulated
Sus_scrofa___MTDH	0.662965	7.84106	10.994	0.00243074	0.0327563	19	4	Up-regulated
Sus_scrofa___SFXN4	0.944445	5.66766	10.9973	0.00243266	0.0327673	19	4	Up-regulated
Sus_scrofa___DDX60	4.24191	6.414	10.9297	0.00243385	0.0327685	19	4	Up-regulated
Sus_scrofa___MPI	3.16904	2.3073	10.7728	0.00243563	0.0327729	19	4	Up-regulated
Sus_scrofa___ZNFX1	1.67551	6.9446	10.9899	0.00243639	0.0327729	19	4	Up-regulated
Sus_scrofa___TDG	0.729899	5.5402	10.9756	0.00245393	0.032949	19	4	Up-regulated
Sus_scrofa___HMGN3	1.22274	5.18389	10.9555	0.00247452	0.0331653	19	4	Up-regulated
Sus_scrofa___HADH	1.48959	5.25542	10.94	0.00248777	0.0332827	19	4	Up-regulated
Sus_scrofa___INIP	0.98543	4.15953	10.9343	0.00249066	0.0333063	19	4	Up-regulated
Sus_scrofa___KCNQ5	2.61405	9.61969	10.9284	0.00249402	0.0333264	19	4	Up-regulated
Sus_scrofa___ADCY10	3.2156	3.06184	10.7718	0.00249442	0.0333264	19	4	Up-regulated
Sus_scrofa___H6PD	1.73416	4.87017	10.9188	0.00249891	0.0333573	19	4	Up-regulated
Sus_scrofa___ENSSSCG00000010165	4.71998	1.50945	10.4977	0.00249898	0.0333573	19	4	Up-regulated
Sus_scrofa___NFATC3	0.601873	8.15121	10.9063	0.00251571	0.0335051	19	4	Up-regulated
Sus_scrofa___TSHZ3	0.868634	7.73714	10.8897	0.00253238	0.0336735	19	4	Up-regulated
Sus_scrofa___GALK2	1.4001	9.21776	10.8889	0.0025329	0.0336735	19	4	Up-regulated
Sus_scrofa___SERTAD1	3.75563	2.80294	10.7651	0.00253566	0.033695	19	4	Up-regulated
Sus_scrofa___IKBKE	1.64758	3.03991	10.6941	0.00255267	0.0338906	19	4	Up-regulated
Sus_scrofa___BTG3	0.912968	6.0805	10.8666	0.00255854	0.0339362	19	4	Up-regulated
Sus_scrofa___ENSSSCG00000016629	1.71661	8.63871	10.8591	0.00256286	0.033965	19	4	Up-regulated
Sus_scrofa___TRAF3	0.732497	7.06493	10.8483	0.0025743	0.0340557	19	4	Up-regulated
Sus_scrofa___SFRP1	1.92166	8.37821	10.8438	0.00257847	0.0340957	19	4	Up-regulated
Sus_scrofa___SLC30A1	2.49422	2.50976	10.6143	0.00258821	0.0342092	19	4	Up-regulated
Sus_scrofa___ILRUN	0.716449	7.23956	10.8316	0.00259113	0.0342325	19	4	Up-regulated
Sus_scrofa___MYBBP1A	1.31731	4.34269	10.8241	0.00259365	0.0342505	19	4	Up-regulated
Sus_scrofa___ENSSSCG00000032591	2.53976	4.55395	10.7363	0.00261279	0.0344418	19	4	Up-regulated
Sus_scrofa___CEP41	1.97899	2.96682	10.5603	0.00265378	0.0349269	19	4	Up-regulated
Sus_scrofa___PDIK1L	1.36968	3.33832	10.6721	0.00265613	0.0349354	19	4	Up-regulated
Sus_scrofa___AQP3	5.02226	4.33743	10.6416	0.00265983	0.034954	19	4	Up-regulated
Sus_scrofa___FAM20B	0.753278	5.07535	10.7737	0.0026599	0.034954	19	4	Up-regulated
Sus_scrofa___UGGT1	0.578315	7.11486	10.7599	0.00266538	0.0350105	19	4	Up-regulated
Sus_scrofa___EIF4A1	0.973563	5.97637	10.7547	0.00267435	0.0350972	19	4	Up-regulated
Sus_scrofa___COX7A2L	1.4915	4.64858	10.7428	0.00268075	0.0351656	19	4	Up-regulated
Sus_scrofa___KCTD1	1.77289	4.15639	10.6898	0.00269862	0.0353389	19	4	Up-regulated
Sus_scrofa___ENSSSCG00000040103	1.45996	4.46095	10.7087	0.00271269	0.0354707	19	4	Up-regulated
Sus_scrofa___CFAP97	0.6826	5.35579	10.7199	0.00271479	0.0354707	19	4	Up-regulated
Sus_scrofa___SNRPF	1.46807	4.06458	10.6823	0.00272336	0.0355415	19	4	Up-regulated
Sus_scrofa___MMGT1	1.58684	3.14477	10.5585	0.00272381	0.0355415	19	4	Up-regulated
Sus_scrofa___CLINT1	0.719943	7.22783	10.6943	0.00273528	0.0356755	19	4	Up-regulated
Sus_scrofa___ENSSSCG00000006213	2.70449	2.37676	10.461	0.00274316	0.0357625	19	4	Up-regulated
Sus_scrofa___ACKR3	1.5521	6.10522	10.6763	0.00275908	0.0359226	19	4	Up-regulated
Sus_scrofa___WDCP	1.73328	3.41869	10.5544	0.00276206	0.0359312	19	4	Up-regulated
Sus_scrofa___SDCBP	0.901871	6.67776	10.6648	0.0027684	0.0359664	19	4	Up-regulated
Sus_scrofa___POLR3D	0.933663	5.29529	10.6667	0.00277284	0.0360068	19	4	Up-regulated
Sus_scrofa___PPIL1	1.47785	3.7013	10.5956	0.00278279	0.0360885	19	4	Up-regulated
Sus_scrofa___PLB1	2.99227	2.64732	10.4601	0.00279585	0.0362103	19	4	Up-regulated
Sus_scrofa___ARPC5L	1.36491	3.39116	10.5515	0.00280202	0.0362744	19	4	Up-regulated
Sus_scrofa___VEPH1	2.79016	4.65013	10.5442	0.002804	0.0362842	19	4	Up-regulated
Sus_scrofa___BAZ1A	0.789974	7.43549	10.6116	0.0028262	0.0364823	19	4	Up-regulated
Sus_scrofa___HDHD5	2.24638	2.09768	10.2904	0.0028267	0.0364823	19	4	Up-regulated
Sus_scrofa___GLB1	1.42385	4.91315	10.6102	0.00283124	0.0365249	19	4	Up-regulated
Sus_scrofa___KCNK12	7.37427	3.55598	10.8409	0.00284058	0.0365977	19	4	Up-regulated
Sus_scrofa___DNAAF2	1.37178	4.81881	10.5961	0.0028469	0.0366313	19	4	Up-regulated
Sus_scrofa___NKRF	2.07042	2.6769	10.3474	0.00286701	0.036874	19	4	Up-regulated
Sus_scrofa___BCL2L12	1.86912	2.57394	10.3176	0.00288262	0.0370427	19	4	Up-regulated
Sus_scrofa___ENSSSCG00000016226	0.970151	6.13852	10.5618	0.00288554	0.0370595	19	4	Up-regulated
Sus_scrofa___SLC35E1	0.922944	5.5146	10.5632	0.0028874	0.0370595	19	4	Up-regulated
Sus_scrofa___TARBP1	0.961487	6.59	10.5586	0.00288769	0.0370595	19	4	Up-regulated
Sus_scrofa___SGPL1	1.17022	5.18703	10.5543	0.00289883	0.0371703	19	4	Up-regulated
Sus_scrofa___LETMD1	1.5335	3.596	10.4727	0.00290494	0.0372164	19	4	Up-regulated
Sus_scrofa___SEC61A1	0.983756	5.26471	10.5464	0.00290825	0.0372329	19	4	Up-regulated
Sus_scrofa___PHF21B	2.37257	3.44611	10.3593	0.00290995	0.0372329	19	4	Up-regulated
Sus_scrofa___PLAU	1.43884	4.1749	10.518	0.00291466	0.03725	19	4	Up-regulated
Sus_scrofa___RPS9	1.02577	6.91768	10.5342	0.00291511	0.03725	19	4	Up-regulated
Sus_scrofa___IBTK	0.675919	7.34754	10.5324	0.0029165	0.0372517	19	4	Up-regulated
Sus_scrofa___EXOG	1.22634	4.65714	10.5327	0.00292089	0.0372918	19	4	Up-regulated
Sus_scrofa___GFUS	1.20234	4.16719	10.5203	0.00292389	0.0372979	19	4	Up-regulated
Sus_scrofa___DAAM1	0.98043	9.01409	10.5034	0.00294986	0.0375321	19	4	Up-regulated
Sus_scrofa___SMC2	0.976384	5.14461	10.5095	0.00295182	0.0375409	19	4	Up-regulated
Sus_scrofa___TRMT6	0.819956	6.52544	10.4817	0.00297718	0.0377985	19	4	Up-regulated
Sus_scrofa___ENSSSCG00000031661	4.55868	3.49481	10.3959	0.00298268	0.0378522	19	4	Up-regulated
Sus_scrofa___TSEN54	2.1018	2.76618	10.2588	0.00298494	0.0378646	19	4	Up-regulated
Sus_scrofa___NUDT12	3.78414	2.83009	10.3619	0.00298669	0.0378707	19	4	Up-regulated
Sus_scrofa___PM20D2	1.75518	3.74786	10.3911	0.00299543	0.0379489	19	4	Up-regulated
Sus_scrofa___DDX24	0.859648	5.89473	10.4663	0.00299821	0.037968	19	4	Up-regulated
Sus_scrofa___EMP1	1.02881	7.71133	10.457	0.00300517	0.0380398	19	4	Up-regulated
Sus_scrofa___PLEKHA8	0.772064	5.82968	10.4567	0.00300983	0.0380826	19	4	Up-regulated
Sus_scrofa___ELP3	0.839712	5.70119	10.4562	0.00301137	0.0380858	19	4	Up-regulated
Sus_scrofa___TDRP	2.12097	4.02713	10.3618	0.00302187	0.0381541	19	4	Up-regulated
Sus_scrofa___CHIC2	0.697781	8.63827	10.442	0.00302279	0.0381541	19	4	Up-regulated
Sus_scrofa___SOD3	2.81383	4.19337	10.3053	0.00302322	0.0381541	19	4	Up-regulated
Sus_scrofa___DHRS11	3.10689	2.94192	10.291	0.00302552	0.038167	19	4	Up-regulated
Sus_scrofa___GPX8	1.61403	4.54471	10.4227	0.00303603	0.0382669	19	4	Up-regulated
Sus_scrofa___FAM155B	2.58245	3.59665	10.2503	0.00304553	0.0383214	19	4	Up-regulated
Sus_scrofa___SCOC	2.42757	2.95844	10.2231	0.00305314	0.0383682	19	4	Up-regulated
Sus_scrofa___TBC1D22B	1.38123	5.34619	10.4094	0.0030693	0.038555	19	4	Up-regulated
Sus_scrofa___ENSSSCG00000009523	1.76715	5.25582	10.39	0.00308801	0.0387571	19	4	Up-regulated
Sus_scrofa___SDHC	2.04151	4.48574	10.3511	0.00309264	0.0387988	19	4	Up-regulated
Sus_scrofa___ENSSSCG00000045726	1.29431	4.03287	10.3636	0.00310015	0.0388766	19	4	Up-regulated
Sus_scrofa___METTL15	1.02349	5.99686	10.3752	0.00310884	0.0389525	19	4	Up-regulated
Sus_scrofa___EIF4G1	0.861196	5.95751	10.3708	0.00311413	0.0389859	19	4	Up-regulated
Sus_scrofa___KLHL29	1.30332	8.35339	10.3664	0.00311545	0.0389859	19	4	Up-regulated
Sus_scrofa___SLC33A1	0.745515	6.34683	10.347	0.00314187	0.0392336	19	4	Up-regulated
Sus_scrofa___AFAP1	0.84081	7.55669	10.3402	0.00314844	0.0392805	19	4	Up-regulated
Sus_scrofa___WDR26	0.767963	6.0373	10.3419	0.0031496	0.0392805	19	4	Up-regulated
Sus_scrofa___PAPPA	2.02825	8.74249	10.3348	0.00315516	0.0393001	19	4	Up-regulated
Sus_scrofa___ENSSSCG00000004489	0.887527	6.7972	10.3344	0.00315678	0.0393038	19	4	Up-regulated
Sus_scrofa___EIF3E	0.604292	6.95774	10.3243	0.00316911	0.0394242	19	4	Up-regulated
Sus_scrofa___CHST9	3.46706	5.73344	10.2679	0.00317751	0.0395045	19	4	Up-regulated
Sus_scrofa___FASTKD2	1.0576	4.26486	10.3189	0.00317824	0.0395045	19	4	Up-regulated
Sus_scrofa___RIOX2	1.40713	5.27685	10.3198	0.00318077	0.0395195	19	4	Up-regulated
Sus_scrofa___GOLGA4	1.65158	6.04701	10.3102	0.00319157	0.0396204	19	4	Up-regulated
Sus_scrofa___SLC35F5	1.00979	5.22105	10.2962	0.00321314	0.0398715	19	4	Up-regulated
Sus_scrofa___RRP9	1.98624	3.21915	10.1096	0.00323962	0.0401357	19	4	Up-regulated
Sus_scrofa___PPA1	1.63096	5.62432	10.2731	0.00323986	0.0401357	19	4	Up-regulated
Sus_scrofa___HDHD2	1.13074	4.89323	10.2648	0.0032536	0.0402723	19	4	Up-regulated
Sus_scrofa___SLC35A2	1.64584	2.8537	10.0562	0.003268	0.0403762	19	4	Up-regulated
Sus_scrofa___TNS4	4.45504	1.338	9.75579	0.00328683	0.0405819	19	4	Up-regulated
Sus_scrofa___BNIP3	1.80842	6.76857	10.2286	0.00329535	0.0406473	19	4	Up-regulated
Sus_scrofa___G6PD	1.39546	4.12158	10.2105	0.00329613	0.0406473	19	4	Up-regulated
Sus_scrofa___AGO1	0.691217	7.61971	10.2249	0.00329722	0.0406473	19	4	Up-regulated
Sus_scrofa___PPP1R14B	2.13743	3.41491	10.0766	0.00329761	0.0406473	19	4	Up-regulated
Sus_scrofa___EPSTI1	2.79764	7.58295	10.2138	0.00331492	0.0407588	19	4	Up-regulated
Sus_scrofa___ZFP36	2.54249	4.76369	10.1545	0.00332449	0.0408256	19	4	Up-regulated
Sus_scrofa___CTNND2	1.59017	3.5174	10.1059	0.003345	0.0410435	19	4	Up-regulated
Sus_scrofa___MRRF	1.05206	4.86408	10.1884	0.00335569	0.0410942	19	4	Up-regulated
Sus_scrofa___EDN1	1.785	4.2069	10.146	0.00335587	0.0410942	19	4	Up-regulated
Sus_scrofa___CMTM2	5.10997	1.78401	9.96291	0.00336068	0.0411336	19	4	Up-regulated
Sus_scrofa___ABCE1	0.789203	7.08905	10.1728	0.00336731	0.0411977	19	4	Up-regulated
Sus_scrofa___ZFR	0.614613	7.72717	10.151	0.00339641	0.041451	19	4	Up-regulated
Sus_scrofa___PPP2CA	2.13431	4.61541	10.1198	0.00339948	0.0414714	19	4	Up-regulated
Sus_scrofa___NUP35	0.894108	4.95524	10.1516	0.00340677	0.0415262	19	4	Up-regulated
Sus_scrofa___NXT2	4.83218	1.57675	9.81303	0.00341086	0.0415347	19	4	Up-regulated
Sus_scrofa___ATP6V0A2	0.800287	5.85936	10.1423	0.00341304	0.0415347	19	4	Up-regulated
Sus_scrofa___YTHDF2	0.749615	6.77864	10.1386	0.00341448	0.0415347	19	4	Up-regulated
Sus_scrofa___CSNK2A2	0.576928	6.34317	10.1352	0.00342001	0.0415678	19	4	Up-regulated
Sus_scrofa___LSM4	1.72806	3.02077	9.96049	0.00342541	0.0416103	19	4	Up-regulated
Sus_scrofa___SRXN1	5.12785	3.22311	10.171	0.00342632	0.0416103	19	4	Up-regulated
Sus_scrofa___SLTM	0.555895	7.41829	10.1242	0.00343337	0.0416788	19	4	Up-regulated
Sus_scrofa___RNPS1	0.935123	5.42088	10.1288	0.00343495	0.041681	19	4	Up-regulated
Sus_scrofa___PSMC6	0.661241	7.29013	10.1191	0.00344066	0.0417161	19	4	Up-regulated
Sus_scrofa___NDUFB6	1.60116	3.93483	10.072	0.00345277	0.0418115	19	4	Up-regulated
Sus_scrofa___TMEM170B	1.67649	3.99288	10.0663	0.00345954	0.0418593	19	4	Up-regulated
Sus_scrofa___UBE2J1	0.951701	4.91827	10.1065	0.00346887	0.0419083	19	4	Up-regulated
Sus_scrofa___DDX3X	0.927332	7.64672	10.0968	0.00347147	0.0419083	19	4	Up-regulated
Sus_scrofa___ENSSSCG00000021155	2.61017	2.32826	9.88172	0.00347208	0.0419083	19	4	Up-regulated
Sus_scrofa___PEX13	1.09201	5.00457	10.0962	0.00348179	0.041998	19	4	Up-regulated
Sus_scrofa___SVEP1	1.97895	10.3235	10.0888	0.00348235	0.041998	19	4	Up-regulated
Sus_scrofa___TGM2	2.26472	7.14556	10.0881	0.00348656	0.0420317	19	4	Up-regulated
Sus_scrofa___IGF2BP2	1.43654	7.69287	10.074	0.00350374	0.0422044	19	4	Up-regulated
Sus_scrofa___FAM98B	0.933259	4.79985	10.0801	0.00350631	0.0422183	19	4	Up-regulated
Sus_scrofa___GLUD1	0.990382	5.26574	10.0727	0.00351438	0.0422678	19	4	Up-regulated
Sus_scrofa___PHOSPHO2	1.92574	2.86512	9.87075	0.0035147	0.0422678	19	4	Up-regulated
Sus_scrofa___SMAD3	1.08739	8.90874	10.0584	0.00352527	0.0423776	19	4	Up-regulated
Sus_scrofa___ENSSSCG00000046085	2.8966	2.09403	9.80275	0.00354658	0.0425992	19	4	Up-regulated
Sus_scrofa___ABHD2	1.63587	5.87367	10.0335	0.00356721	0.0427777	19	4	Up-regulated
Sus_scrofa___ENSSSCG00000039004	1.57979	3.52292	9.95254	0.00357012	0.0427953	19	4	Up-regulated
Sus_scrofa___ZNF207	0.572161	7.37018	10.0255	0.00357274	0.0428092	19	4	Up-regulated
Sus_scrofa___ENSSSCG00000002825	5.73834	2.24032	10.0357	0.00358556	0.0429281	19	4	Up-regulated
Sus_scrofa___WWTR1	0.733112	8.63184	10.0084	0.00359709	0.0430202	19	4	Up-regulated
Sus_scrofa___MX1	3.14592	7.72459	10.011	0.00359735	0.0430202	19	4	Up-regulated
Sus_scrofa___phTBM	6.57242	2.88703	10.1808	0.00361221	0.0431426	19	4	Up-regulated
Sus_scrofa___ALDH7A1	0.947729	5.76544	9.99984	0.00361573	0.0431673	19	4	Up-regulated
Sus_scrofa___SLC35B2	1.62197	3.52166	9.91305	0.00362233	0.0432286	19	4	Up-regulated
Sus_scrofa___ENSSSCG00000010546	4.36431	1.30226	9.49979	0.00363132	0.0433184	19	4	Up-regulated
Sus_scrofa___NSRP1	0.536106	7.33133	9.97546	0.00364578	0.043421	19	4	Up-regulated
Sus_scrofa___MTREX	0.530992	7.5805	9.96622	0.00365926	0.0435572	19	4	Up-regulated
Sus_scrofa___ISG12(A)	3.51624	6.8487	9.96248	0.00366016	0.0435572	19	4	Up-regulated
Sus_scrofa___TTC1	1.44284	6.50079	9.95962	0.00367234	0.0436748	19	4	Up-regulated
Sus_scrofa___PUS1	1.14914	4.5086	9.96038	0.00367299	0.0436748	19	4	Up-regulated
Sus_scrofa___FUBP1	0.700096	7.34887	9.95157	0.00368123	0.0437377	19	4	Up-regulated
Sus_scrofa___GOLGA1	0.567053	6.45954	9.93789	0.0037031	0.0439799	19	4	Up-regulated
Sus_scrofa___AZIN1	0.898055	6.13898	9.93555	0.00370852	0.0440266	19	4	Up-regulated
Sus_scrofa___ENSSSCG00000043835	1.36708	5.13005	9.93586	0.00371159	0.0440277	19	4	Up-regulated
Sus_scrofa___GDI2	0.657579	7.1753	9.9275	0.00371741	0.0440614	19	4	Up-regulated
Sus_scrofa___ARHGAP5	0.897621	7.77595	9.92029	0.00372793	0.0441685	19	4	Up-regulated
Sus_scrofa___VASN	2.1668	2.8033	9.7199	0.00374308	0.0442944	19	4	Up-regulated
Sus_scrofa___ZNF165	4.01717	1.12182	9.33408	0.00376255	0.0444365	19	4	Up-regulated
Sus_scrofa___RAD52	0.842785	6.88292	9.88548	0.00378183	0.0446464	19	4	Up-regulated
Sus_scrofa___AFF4	0.65402	8.38938	9.86352	0.00381446	0.0449957	19	4	Up-regulated
Sus_scrofa___ELAVL2	3.10232	1.69615	9.51087	0.00385797	0.0454366	19	4	Up-regulated
Sus_scrofa___NSA2	1.0147	4.14907	9.83024	0.0038679	0.0455355	19	4	Up-regulated
Sus_scrofa___ADORA2A	1.13884	4.82421	9.82742	0.00388031	0.0456477	19	4	Up-regulated
Sus_scrofa___ILF2	1.44513	3.95464	9.78956	0.00389085	0.0456967	19	4	Up-regulated
Sus_scrofa___NPFFR2	5.12025	1.76135	9.61291	0.00389986	0.0457662	19	4	Up-regulated
Sus_scrofa___ENSSSCG00000039538	2.66871	2.35227	9.60249	0.00391859	0.0459655	19	4	Up-regulated
Sus_scrofa___LIX1L	2.18645	3.5384	9.6666	0.00391995	0.0459655	19	4	Up-regulated
Sus_scrofa___ALYREF	1.90241	2.91428	9.61535	0.0039248	0.045986	19	4	Up-regulated
Sus_scrofa___GRHPR	2.418	2.22501	9.5568	0.00392973	0.0460073	19	4	Up-regulated
Sus_scrofa___YPEL2	1.84525	7.07473	9.78944	0.0039336	0.0460345	19	4	Up-regulated
Sus_scrofa___POMGNT1	1.23736	3.99485	9.76657	0.00394749	0.0461423	19	4	Up-regulated
Sus_scrofa___SEL1L2	3.25669	1.88504	9.5037	0.00397321	0.0464064	19	4	Up-regulated
Sus_scrofa___ACKR2	1.11117	7.9669	9.75784	0.00398215	0.0464741	19	4	Up-regulated
Sus_scrofa___DPH7	1.22513	4.22662	9.75294	0.00398372	0.0464741	19	4	Up-regulated
Sus_scrofa___ENSSSCG00000028414	0.864024	5.84524	9.7573	0.00398849	0.0464748	19	4	Up-regulated
Sus_scrofa___EML4	0.862012	8.24711	9.74899	0.00399636	0.0465117	19	4	Up-regulated
Sus_scrofa___ENSSSCG00000036529	0.998627	5.25834	9.75207	0.00400152	0.0465388	19	4	Up-regulated
Sus_scrofa___PAICS	1.05926	3.85224	9.73174	0.00400727	0.0465838	19	4	Up-regulated
Sus_scrofa___TBX3	1.64472	3.98085	9.69668	0.00402232	0.0466861	19	4	Up-regulated
Sus_scrofa___CCDC32	1.15823	3.70974	9.70792	0.00402548	0.0466861	19	4	Up-regulated
Sus_scrofa___ZNF629	1.28397	3.27056	9.65588	0.00402553	0.0466861	19	4	Up-regulated
Sus_scrofa___UBTD1	0.939514	5.21334	9.7251	0.00404621	0.0468892	19	4	Up-regulated
Sus_scrofa___FBL	1.60108	4.39637	9.70299	0.00405139	0.0469171	19	4	Up-regulated
Sus_scrofa___CRTAC1	2.1287	2.73348	9.51561	0.00406482	0.0469855	19	4	Up-regulated
Sus_scrofa___GRM2	4.12045	1.19903	9.17703	0.00407732	0.0470656	19	4	Up-regulated
Sus_scrofa___EXOSC5	1.49815	4.2805	9.68535	0.00408159	0.0470938	19	4	Up-regulated
Sus_scrofa___ZNF664	1.41678	5.92807	9.70028	0.00408295	0.0470938	19	4	Up-regulated
Sus_scrofa___MKKS	1.62959	3.28023	9.58009	0.00409709	0.0471651	19	4	Up-regulated
Sus_scrofa___ENSSSCG00000033241	5.48608	1.95622	9.61935	0.00411314	0.0472947	19	4	Up-regulated
Sus_scrofa___TRIM71	2.07754	3.50581	9.55542	0.00412479	0.0473919	19	4	Up-regulated
Sus_scrofa___MAGI1	1.17321	9.68351	9.66048	0.00414311	0.0475654	19	4	Up-regulated
Sus_scrofa___CACYBP	1.08927	6.09396	9.64146	0.0041804	0.0478847	19	4	Up-regulated
Sus_scrofa___NARS1	0.975746	6.10746	9.63666	0.00418822	0.0479532	19	4	Up-regulated
Sus_scrofa___SYN1	4.78014	3.65391	9.56314	0.00419394	0.0480002	19	4	Up-regulated
Sus_scrofa___RHOT1	1.50146	5.86239	9.62925	0.00420347	0.0480907	19	4	Up-regulated
Sus_scrofa___ENSSSCG00000041499	2.79056	3.66795	9.46396	0.00421755	0.0482145	19	4	Up-regulated
Sus_scrofa___ENSSSCG00000039635	1.51876	4.03163	9.58535	0.00422938	0.0482938	19	4	Up-regulated
Sus_scrofa___FN1	2.12735	9.73134	9.60032	0.00424636	0.0484503	19	4	Up-regulated
Sus_scrofa___ENSSSCG00000037299	1.28941	3.89217	9.57773	0.00425348	0.0484943	19	4	Up-regulated
Sus_scrofa___ENSSSCG00000013380	1.18562	5.36783	9.56896	0.0043109	0.0489605	19	4	Up-regulated
Sus_scrofa___PHKG2	0.953151	4.54582	9.56293	0.00432428	0.0490936	19	4	Up-regulated
Sus_scrofa___C12orf43	1.14074	3.39838	9.50199	0.00433143	0.0491559	19	4	Up-regulated
Sus_scrofa___ENSSSCG00000037143	0.624059	6.35083	9.54464	0.00434693	0.0492564	19	4	Up-regulated
Sus_scrofa___URB2	1.08636	4.50925	9.54246	0.00435642	0.0493307	19	4	Up-regulated
Sus_scrofa___C1orf43	0.817305	4.89879	9.54555	0.00435683	0.0493307	19	4	Up-regulated
Sus_scrofa___TNFRSF1A	1.07481	5.13636	9.54105	0.00436192	0.0493695	19	4	Up-regulated
Sus_scrofa___GSDME	2.27104	3.58929	9.40839	0.00437056	0.0494295	19	4	Up-regulated
Sus_scrofa___TMEM176A	1.82754	2.98606	9.36759	0.00437568	0.0494497	19	4	Up-regulated
Sus_scrofa___MRPL50	2.3163	2.82207	9.34994	0.00438566	0.0495435	19	4	Up-regulated
Sus_scrofa___TMA16	1.06501	4.34416	9.51986	0.00439431	0.0495845	19	4	Up-regulated
Sus_scrofa___ENSSSCG00000031912	2.91407	5.24373	9.45539	0.00443815	0.049984	19	4	Up-regulated
Sus_scrofa___MYL7	-6.96263	4.17736	145.96	1.23045e-16	3.64458e-12	19	4	Down-regulated
Sus_scrofa___LEPR	-4.8819	3.54792	160.453	6.50843e-16	9.63899e-12	19	4	Down-regulated
Sus_scrofa___NOX5	-4.73304	4.41327	171.484	1.69151e-14	1.67008e-10	19	4	Down-regulated
Sus_scrofa___SLC6A20	-3.61429	4.86812	189.847	2.44548e-14	1.81088e-10	19	4	Down-regulated
Sus_scrofa___SPARCL1	-2.77735	8.68999	156.883	2.44244e-13	1.20575e-09	19	4	Down-regulated
Sus_scrofa___HSPB6	-5.22027	2.28837	91.4489	8.20057e-13	3.47001e-09	19	4	Down-regulated
Sus_scrofa___TMEM272	-3.92014	2.3671	87.3875	2.23941e-12	8.29141e-09	19	4	Down-regulated
Sus_scrofa___SCN7A	-3.78811	4.33915	125.208	2.99697e-12	9.86338e-09	19	4	Down-regulated
Sus_scrofa___PSAT1	-3.65236	4.26161	122.167	4.20252e-12	1.24479e-08	19	4	Down-regulated
Sus_scrofa___ENSSSCG00000032896	-3.86719	3.48964	103.795	6.8242e-12	1.83757e-08	19	4	Down-regulated
Sus_scrofa___PLSCR5	-3.83721	2.02896	77.6768	8.46089e-12	2.06613e-08	19	4	Down-regulated
Sus_scrofa___KLHL13	-3.42183	6.6358	116.928	9.06807e-12	2.06613e-08	19	4	Down-regulated
Sus_scrofa___MTUS2	-4.82181	6.97605	107.021	2.68539e-11	5.36794e-08	19	4	Down-regulated
Sus_scrofa___RPS6KA5	-2.04115	6.57507	106.318	2.7184e-11	5.36794e-08	19	4	Down-regulated
Sus_scrofa___KAZN	-2.79212	9.26933	104.16	3.41635e-11	6.32451e-08	19	4	Down-regulated
Sus_scrofa___SYT9	-2.90825	4.69393	103.325	4.16318e-11	7.25373e-08	19	4	Down-regulated
Sus_scrofa___LY86	-3.95534	1.89681	67.4136	6.45373e-11	1.062e-07	19	4	Down-regulated
Sus_scrofa___FNDC5	-3.04603	3.43579	89.1907	1.02714e-10	1.56646e-07	19	4	Down-regulated
Sus_scrofa___MPP2	-3.57286	2.92801	77.4004	1.10078e-10	1.56646e-07	19	4	Down-regulated
Sus_scrofa___PLCB4	-2.97703	9.43813	93.4742	1.18145e-10	1.56646e-07	19	4	Down-regulated
Sus_scrofa___ABCA8	-3.57417	9.45131	93.4627	1.18335e-10	1.56646e-07	19	4	Down-regulated
Sus_scrofa___ACTC1	-4.82126	3.24111	68.4808	1.21636e-10	1.56646e-07	19	4	Down-regulated
Sus_scrofa___ENSSSCG00000040719	-3.45409	3.38923	79.0878	2.64035e-10	3.10186e-07	19	4	Down-regulated
Sus_scrofa___XKR8	-2.85376	2.90342	76.4432	3.22699e-10	3.54013e-07	19	4	Down-regulated
Sus_scrofa___ENSSSCG00000045443	-3.19944	1.60771	59.1769	4.11608e-10	4.35422e-07	19	4	Down-regulated
Sus_scrofa___RHPN2	-2.95109	4.60856	83.076	4.7807e-10	4.75546e-07	19	4	Down-regulated
Sus_scrofa___FNBP1	-1.34794	7.75561	82.417	4.81647e-10	4.75546e-07	19	4	Down-regulated
Sus_scrofa___SEMA6D	-2.43668	6.55681	81.2719	5.67227e-10	5.36882e-07	19	4	Down-regulated
Sus_scrofa___YTHDC2	-1.27623	7.40517	80.7488	6.02978e-10	5.36882e-07	19	4	Down-regulated
Sus_scrofa___SLC25A45	-3.51825	1.91965	57.9374	6.21761e-10	5.36882e-07	19	4	Down-regulated
Sus_scrofa___ENSSSCG00000023479	-2.87557	6.44647	80.6021	6.25704e-10	5.36882e-07	19	4	Down-regulated
Sus_scrofa___CNTN3	-2.49184	7.74762	80.377	6.34398e-10	5.36882e-07	19	4	Down-regulated
Sus_scrofa___ENSSSCG00000031640	-4.15953	2.87676	62.7184	6.56036e-10	5.39772e-07	19	4	Down-regulated
Sus_scrofa___JAM2	-2.22543	5.55271	78.7409	8.23241e-10	6.59038e-07	19	4	Down-regulated
Sus_scrofa___ABCG2	-1.64948	7.36344	76.7373	1.04882e-09	7.96566e-07	19	4	Down-regulated
Sus_scrofa___TNS3	-2.6956	7.30422	75.4013	1.26984e-09	9.40319e-07	19	4	Down-regulated
Sus_scrofa___WNT5A	-2.61778	3.84881	74.5914	1.35732e-09	9.62058e-07	19	4	Down-regulated
Sus_scrofa___PCSK6	-1.96277	9.40694	74.8709	1.36416e-09	9.62058e-07	19	4	Down-regulated
Sus_scrofa___UNKL	-1.56993	7.07919	74.0881	1.53033e-09	1.05415e-06	19	4	Down-regulated
Sus_scrofa___FYB1	-2.83757	3.12387	67.3871	1.99758e-09	1.34201e-06	19	4	Down-regulated
Sus_scrofa___PRKCB	-2.39281	4.92857	72.5791	2.03884e-09	1.34201e-06	19	4	Down-regulated
Sus_scrofa___CEP112	-1.64411	7.78442	70.343	2.64829e-09	1.66899e-06	19	4	Down-regulated
Sus_scrofa___DISC1	-1.14126	7.84143	68.7888	3.34742e-09	2.06564e-06	19	4	Down-regulated
Sus_scrofa___GALR1	-3.92213	3.34873	59.4913	3.47821e-09	2.10254e-06	19	4	Down-regulated
Sus_scrofa___BTNL9	-3.62605	2.51431	53.524	3.97901e-09	2.35716e-06	19	4	Down-regulated
Sus_scrofa___RGS1	-4.00212	2.30787	50.8322	4.29014e-09	2.49165e-06	19	4	Down-regulated
Sus_scrofa___PIK3CG	-3.17446	1.96331	51.0928	4.42415e-09	2.52006e-06	19	4	Down-regulated
Sus_scrofa___ENSSSCG00000035736	-4.7362	1.29971	58.9646	4.55881e-09	2.54777e-06	19	4	Down-regulated
Sus_scrofa___ARHGAP15	-2.4744	4.30504	66.1227	5.39368e-09	2.92239e-06	19	4	Down-regulated
Sus_scrofa___EHD3	-3.75224	2.93673	54.8102	5.42646e-09	2.92239e-06	19	4	Down-regulated
Sus_scrofa___PCP4	-4.78261	3.02081	49.8405	5.86586e-09	3.04819e-06	19	4	Down-regulated
Sus_scrofa___CEP290	-1.47178	6.50082	64.2465	6.82441e-09	3.48516e-06	19	4	Down-regulated
Sus_scrofa___EEF1A2	-4.90703	3.15557	49.1598	6.94409e-09	3.48617e-06	19	4	Down-regulated
Sus_scrofa___SESN3	-2.28085	6.72261	63.7206	7.4298e-09	3.64548e-06	19	4	Down-regulated
Sus_scrofa___ENSSSCG00000028741	-2.97551	3.82038	62.6926	7.50757e-09	3.64548e-06	19	4	Down-regulated
Sus_scrofa___ENSSSCG00000014314	-2.48735	3.79733	63.2215	7.80064e-09	3.72669e-06	19	4	Down-regulated
Sus_scrofa___ENSSSCG00000028944	-3.73667	4.06468	61.1003	8.28048e-09	3.80055e-06	19	4	Down-regulated
Sus_scrofa___EFHC1	-1.91801	5.44077	63.0604	8.46847e-09	3.80055e-06	19	4	Down-regulated
Sus_scrofa___SESTD1	-1.42973	9.39086	61.7972	1.00898e-08	4.39498e-06	19	4	Down-regulated
Sus_scrofa___PIK3R5	-2.79262	2.63689	54.3071	1.09e-08	4.6791e-06	19	4	Down-regulated
Sus_scrofa___SUSD4	-2.81652	4.71594	61.4039	1.15227e-08	4.87574e-06	19	4	Down-regulated
Sus_scrofa___ENSSSCG00000015747	-4.80638	4.79178	57.756	1.31297e-08	5.4775e-06	19	4	Down-regulated
Sus_scrofa___PNPO	-1.76969	5.40705	59.4609	1.52876e-08	6.26512e-06	19	4	Down-regulated
Sus_scrofa___SLC25A27	-1.93928	6.10324	59.3076	1.54407e-08	6.26512e-06	19	4	Down-regulated
Sus_scrofa___ENSSSCG00000036029	-3.21823	1.6749	44.8792	1.59694e-08	6.39209e-06	19	4	Down-regulated
Sus_scrofa___DCHS2	-2.69078	4.30131	59.0379	1.67026e-08	6.50961e-06	19	4	Down-regulated
Sus_scrofa___LIPC	-2.20925	5.6787	58.8355	1.6944e-08	6.51794e-06	19	4	Down-regulated
Sus_scrofa___ALDH1A1	-2.94889	5.93404	58.6314	1.76161e-08	6.6896e-06	19	4	Down-regulated
Sus_scrofa___HMGCLL1	-3.28946	3.20505	53.5631	1.79965e-08	6.74754e-06	19	4	Down-regulated
Sus_scrofa___SGSM1	-2.45387	5.69457	57.6032	2.09833e-08	7.76908e-06	19	4	Down-regulated
Sus_scrofa___SKAP1	-2.41782	3.78155	56.5926	2.35911e-08	8.62676e-06	19	4	Down-regulated
Sus_scrofa___COL15A1	-1.99925	8.9679	56.3174	2.55062e-08	9.21335e-06	19	4	Down-regulated
Sus_scrofa___ENSSSCG00000014097	-1.83311	4.79824	56.5267	2.59199e-08	9.24995e-06	19	4	Down-regulated
Sus_scrofa___GPR137B	-1.45002	4.99558	56.1764	2.71623e-08	9.49765e-06	19	4	Down-regulated
Sus_scrofa___CKM	-5.47604	4.39359	47.7991	2.72552e-08	9.49765e-06	19	4	Down-regulated
Sus_scrofa___ARRB2	-2.45854	2.61293	50.5104	2.77541e-08	9.55904e-06	19	4	Down-regulated
Sus_scrofa___HSDL1	-2.03193	3.08222	54.148	2.84437e-08	9.61343e-06	19	4	Down-regulated
Sus_scrofa___WRAP73	-1.46513	5.54158	55.4867	3.00638e-08	1.00055e-05	19	4	Down-regulated
Sus_scrofa___FAIM2	-2.95777	3.00725	50.8181	3.09562e-08	1.0188e-05	19	4	Down-regulated
Sus_scrofa___IFT140	-1.39939	5.86079	55.1298	3.17944e-08	1.03127e-05	19	4	Down-regulated
Sus_scrofa___NREP	-3.58574	4.70895	55.1577	3.20313e-08	1.03127e-05	19	4	Down-regulated
Sus_scrofa___TMEM71	-3.72585	1.53067	42.1172	3.52189e-08	1.12031e-05	19	4	Down-regulated
Sus_scrofa___REPS2	-1.60279	6.20705	54.4786	3.55535e-08	1.12031e-05	19	4	Down-regulated
Sus_scrofa___ENSSSCG00000009125	-1.57241	9.65685	54.3687	3.59898e-08	1.12212e-05	19	4	Down-regulated
Sus_scrofa___CASZ1	-4.22442	1.66215	42.4583	3.68016e-08	1.12425e-05	19	4	Down-regulated
Sus_scrofa___FGD2	-3.15879	2.49215	45.9589	3.82368e-08	1.15569e-05	19	4	Down-regulated
Sus_scrofa___BMF	-2.84788	3.39703	52.2846	3.87424e-08	1.15914e-05	19	4	Down-regulated
Sus_scrofa___OSTF1	-1.28479	7.00438	53.6265	4.11989e-08	1.22031e-05	19	4	Down-regulated
Sus_scrofa___TMOD2	-2.14658	4.59432	53.6123	4.3789e-08	1.28419e-05	19	4	Down-regulated
Sus_scrofa___ARHGAP21	-1.07698	8.79011	52.8514	4.73342e-08	1.3612e-05	19	4	Down-regulated
Sus_scrofa___CSF1R	-3.54434	3.09266	47.3723	4.88816e-08	1.37893e-05	19	4	Down-regulated
Sus_scrofa___ENSSSCG00000027232	-3.26127	1.73748	40.6966	5.29892e-08	1.47545e-05	19	4	Down-regulated
Sus_scrofa___RAVER2	-1.9338	4.47645	52.529	5.32995e-08	1.47545e-05	19	4	Down-regulated
Sus_scrofa___HPS3	-1.59577	5.4473	51.943	5.70973e-08	1.55396e-05	19	4	Down-regulated
Sus_scrofa___ENSSSCG00000013100	-3.22278	2.71713	45.4176	5.7185e-08	1.55396e-05	19	4	Down-regulated
Sus_scrofa___KIFC2	-3.30523	1.697	40.1182	5.99782e-08	1.61505e-05	19	4	Down-regulated
Sus_scrofa___KMO	-2.40732	2.77804	48.0295	6.09726e-08	1.62703e-05	19	4	Down-regulated
Sus_scrofa___CDK5RAP2	-1.76506	5.89332	51.1717	6.52715e-08	1.7262e-05	19	4	Down-regulated
Sus_scrofa___GRID2	-1.94186	5.04481	51.1182	6.77167e-08	1.75945e-05	19	4	Down-regulated
Sus_scrofa___BCL11B	-3.9233	1.40271	40.1749	7.5226e-08	1.93756e-05	19	4	Down-regulated
Sus_scrofa___RNF207	-4.67812	1.12917	49.3661	8.46304e-08	2.14252e-05	19	4	Down-regulated
Sus_scrofa___BTK	-2.68314	1.61682	38.9447	9.2572e-08	2.2661e-05	19	4	Down-regulated
Sus_scrofa___IFT46	-1.44129	5.17674	49.2408	9.53086e-08	2.31397e-05	19	4	Down-regulated
Sus_scrofa___RNF180	-1.7051	8.11397	49.0389	9.6476e-08	2.31455e-05	19	4	Down-regulated
Sus_scrofa___ULK2	-1.01411	8.30636	49.0155	9.68953e-08	2.31455e-05	19	4	Down-regulated
Sus_scrofa___LAYN	-2.48665	2.69125	44.5092	1.05388e-07	2.45795e-05	19	4	Down-regulated
Sus_scrofa___ART4	-2.54476	7.05972	48.2782	1.12e-07	2.57166e-05	19	4	Down-regulated
Sus_scrofa___CD3E	-3.37093	1.15862	38.5814	1.19264e-07	2.71738e-05	19	4	Down-regulated
Sus_scrofa___COLGALT2	-2.55021	6.25206	47.7688	1.24618e-07	2.79635e-05	19	4	Down-regulated
Sus_scrofa___ARHGAP4	-3.70622	1.27311	38.4908	1.26787e-07	2.82364e-05	19	4	Down-regulated
Sus_scrofa___RHOH	-3.1495	2.2214	39.5753	1.30004e-07	2.87366e-05	19	4	Down-regulated
Sus_scrofa___ENO3	-4.38488	2.78755	38.1971	1.33786e-07	2.93537e-05	19	4	Down-regulated
Sus_scrofa___MTURN	-1.65867	5.26994	47.3426	1.37289e-07	2.99006e-05	19	4	Down-regulated
Sus_scrofa___ITK	-4.45485	1.34948	41.001	1.38998e-07	3.00519e-05	19	4	Down-regulated
Sus_scrofa___CORO1A	-4.11405	1.05751	41.9982	1.50017e-07	3.19677e-05	19	4	Down-regulated
Sus_scrofa___TTC21B	-1.26113	7.65189	46.5898	1.55357e-07	3.28691e-05	19	4	Down-regulated
Sus_scrofa___C11orf53	-2.99966	1.79626	37.2293	1.57161e-07	3.30149e-05	19	4	Down-regulated
Sus_scrofa___CD4	-2.72441	1.97512	37.9592	1.63861e-07	3.40251e-05	19	4	Down-regulated
Sus_scrofa___DLG2	-2.43481	9.3367	46.2177	1.67157e-07	3.43833e-05	19	4	Down-regulated
Sus_scrofa___GAMT	-2.46029	1.85052	37.7337	1.78324e-07	3.59904e-05	19	4	Down-regulated
Sus_scrofa___MYL3	-4.91525	5.07501	44.8374	1.78615e-07	3.59904e-05	19	4	Down-regulated
Sus_scrofa___LRRK1	-0.894951	8.25993	45.8181	1.81033e-07	3.62311e-05	19	4	Down-regulated
Sus_scrofa___ENSSSCG00000010878	-1.46724	6.14626	45.7632	1.84159e-07	3.66094e-05	19	4	Down-regulated
Sus_scrofa___LAIR1	-3.57437	1.44008	36.3457	1.85757e-07	3.66808e-05	19	4	Down-regulated
Sus_scrofa___TFDP2	-1.24127	8.23376	45.47	1.94104e-07	3.76107e-05	19	4	Down-regulated
Sus_scrofa___ENSSSCG00000012520	-1.97892	3.67438	44.9143	2.17348e-07	4.13671e-05	19	4	Down-regulated
Sus_scrofa___PROM1	-2.27847	4.35471	45.1136	2.19072e-07	4.13671e-05	19	4	Down-regulated
Sus_scrofa___KLRK1	-4.45932	1.13057	42.0958	2.19265e-07	4.13671e-05	19	4	Down-regulated
Sus_scrofa___PDK4	-3.62999	6.18341	44.9426	2.21794e-07	4.15793e-05	19	4	Down-regulated
Sus_scrofa___BLNK	-2.56655	3.37046	43.7629	2.28043e-07	4.24821e-05	19	4	Down-regulated
Sus_scrofa___ENSSSCG00000029771	-1.54446	7.9904	44.5798	2.32359e-07	4.28378e-05	19	4	Down-regulated
Sus_scrofa___ENSSSCG00000000530	-1.8208	7.05637	44.577	2.32846e-07	4.28378e-05	19	4	Down-regulated
Sus_scrofa___NCOA7	-1.34842	7.52907	44.115	2.55535e-07	4.6722e-05	19	4	Down-regulated
Sus_scrofa___NQO2	-1.68134	5.09313	44.1427	2.61359e-07	4.71129e-05	19	4	Down-regulated
Sus_scrofa___SNCAIP	-2.11097	4.54445	44.2242	2.62445e-07	4.71129e-05	19	4	Down-regulated
Sus_scrofa___LCP2	-3.31388	2.65258	38.6775	2.64849e-07	4.7258e-05	19	4	Down-regulated
Sus_scrofa___ENSSSCG00000013754	-2.26923	5.62574	44.0035	2.66528e-07	4.72729e-05	19	4	Down-regulated
Sus_scrofa___SLC35F3	-3.57273	5.94687	44.028	2.68968e-07	4.74216e-05	19	4	Down-regulated
Sus_scrofa___ENSSSCG00000000367	-1.8318	4.14037	44.0165	2.73745e-07	4.79783e-05	19	4	Down-regulated
Sus_scrofa___ENSSSCG00000044640	-3.14735	2.44515	37.7031	2.77366e-07	4.83269e-05	19	4	Down-regulated
Sus_scrofa___DNAI3	-2.74213	2.8842	40.4731	2.97959e-07	5.16113e-05	19	4	Down-regulated
Sus_scrofa___PRRC2B	-0.901262	8.42454	43.335	2.99835e-07	5.16343e-05	19	4	Down-regulated
Sus_scrofa___ENSSSCG00000003261	-3.10446	3.06972	40.0851	3.10995e-07	5.29406e-05	19	4	Down-regulated
Sus_scrofa___C1QB	-3.23848	1.93857	35.1471	3.22334e-07	5.408e-05	19	4	Down-regulated
Sus_scrofa___SLC22A4	-2.55649	2.84117	40.277	3.23166e-07	5.408e-05	19	4	Down-regulated
Sus_scrofa___MTHFR	-1.87058	4.50313	43.0468	3.33849e-07	5.52436e-05	19	4	Down-regulated
Sus_scrofa___DENND11	-2.05004	3.10732	41.7386	3.40174e-07	5.59774e-05	19	4	Down-regulated
Sus_scrofa___FRMD4A	-1.09911	9.06343	42.5694	3.51526e-07	5.75259e-05	19	4	Down-regulated
Sus_scrofa___MORC1	-2.24987	4.47054	42.7527	3.55006e-07	5.77762e-05	19	4	Down-regulated
Sus_scrofa___ENSSSCG00000013788	-2.43008	2.14502	36.4693	3.77579e-07	6.05287e-05	19	4	Down-regulated
Sus_scrofa___ARHGAP25	-2.11893	3.70088	42.1313	3.83016e-07	6.09943e-05	19	4	Down-regulated
Sus_scrofa___CDC25B	-1.81031	5.08185	42.1976	3.91227e-07	6.16391e-05	19	4	Down-regulated
Sus_scrofa___ADAMTS16	-2.86484	3.60305	41.2622	4.0418e-07	6.33429e-05	19	4	Down-regulated
Sus_scrofa___ABCA9	-2.24008	8.03133	40.9248	4.98023e-07	7.68304e-05	19	4	Down-regulated
Sus_scrofa___CDH7	-2.53338	3.16696	39.47	5.273e-07	8.09256e-05	19	4	Down-regulated
Sus_scrofa___CYTH4	-2.97374	1.78299	33.1944	5.43929e-07	8.26214e-05	19	4	Down-regulated
Sus_scrofa___DEPTOR	-1.3298	6.89694	40.4711	5.49619e-07	8.30598e-05	19	4	Down-regulated
Sus_scrofa___ULK4	-1.17895	6.85578	40.3141	5.68566e-07	8.5487e-05	19	4	Down-regulated
Sus_scrofa___TXK	-2.10255	1.88665	33.9115	6.25471e-07	9.21714e-05	19	4	Down-regulated
Sus_scrofa___BRD3	-1.22332	6.34021	39.7975	6.3726e-07	9.34437e-05	19	4	Down-regulated
Sus_scrofa___ENSSSCG00000038192	-2.59466	1.70527	32.6281	6.58853e-07	9.61342e-05	19	4	Down-regulated
Sus_scrofa___TP53BP1	-0.951626	6.80518	39.3181	7.06191e-07	0.00010105	19	4	Down-regulated
Sus_scrofa___ENSSSCG00000012101	-2.93715	1.77619	32.1344	7.37629e-07	0.000104539	19	4	Down-regulated
Sus_scrofa___CLDN4	-3.55255	2.08581	32.1655	7.4252e-07	0.000104731	19	4	Down-regulated
Sus_scrofa___RGS12	-1.09695	6.38906	38.9665	7.64103e-07	0.000106854	19	4	Down-regulated
Sus_scrofa___ENSSSCG00000026217	-4.72804	1.05919	41.4294	7.64786e-07	0.000106854	19	4	Down-regulated
Sus_scrofa___KLHL7	-1.35832	5.94162	38.8363	7.89293e-07	0.000108997	19	4	Down-regulated
Sus_scrofa___FGD3	-2.14036	2.34897	35.0954	8.09179e-07	0.000110451	19	4	Down-regulated
Sus_scrofa___GK5	-1.25849	7.63263	38.6351	8.19998e-07	0.000111115	19	4	Down-regulated
Sus_scrofa___KDM2B	-1.37685	5.90187	38.6099	8.30268e-07	0.000111784	19	4	Down-regulated
Papio_anubis_ENSPANG00000016983	-4.68904	2.73027	31.4476	8.70188e-07	0.000116104	19	4	Down-regulated
Sus_scrofa___ENSSSCG00000029596	-2.63045	2.01763	32.5934	8.83583e-07	0.000117362	19	4	Down-regulated
Sus_scrofa___ENSSSCG00000007512	-1.28765	5.43486	38.1167	9.32345e-07	0.000122195	19	4	Down-regulated
Sus_scrofa___CMTM8	-1.86778	6.76777	38.031	9.39886e-07	0.000122641	19	4	Down-regulated
Sus_scrofa___RADIL	-1.57336	6.09717	38.0069	9.48146e-07	0.000123176	19	4	Down-regulated
Sus_scrofa___NCKAP1L	-3.04862	2.08597	32.1571	9.58987e-07	0.000123501	19	4	Down-regulated
Sus_scrofa___ENSSSCG00000006156	-1.4815	5.84731	37.8423	9.8604e-07	0.00012589	19	4	Down-regulated
Sus_scrofa___DKK2	-2.63875	4.13791	37.6174	1.05027e-06	0.000132944	19	4	Down-regulated
Sus_scrofa___SEMA6C	-2.3889	3.00331	36.0025	1.06873e-06	0.000134705	19	4	Down-regulated
Sus_scrofa___FARP2	-1.25214	6.22408	37.3258	1.10318e-06	0.000138189	19	4	Down-regulated
Sus_scrofa___MEIOB	-1.33924	7.45583	37.265	1.11462e-06	0.000138189	19	4	Down-regulated
Sus_scrofa___NDUFA1	-3.05877	2.73463	33.7652	1.11483e-06	0.000138189	19	4	Down-regulated
Sus_scrofa___ENSSSCG00000001456	-2.41659	4.31058	37.4204	1.11503e-06	0.000138189	19	4	Down-regulated
Sus_scrofa___CYP39A1	-1.51147	6.15811	37.1465	1.14998e-06	0.000141338	19	4	Down-regulated
Sus_scrofa___ENSSSCG00000039807	-2.41031	2.39505	33.2832	1.17713e-06	0.000143484	19	4	Down-regulated
Sus_scrofa___COX7A1	-4.426	4.35621	35.346	1.22748e-06	0.0001484	19	4	Down-regulated
Sus_scrofa___CDO1	-2.23844	4.27796	36.9049	1.25631e-06	0.000151267	19	4	Down-regulated
Sus_scrofa___ASTN1	-2.38098	2.78547	34.5529	1.32918e-06	0.000158857	19	4	Down-regulated
Sus_scrofa___MAL	-2.59833	2.83031	34.1563	1.45607e-06	0.000173208	19	4	Down-regulated
Sus_scrofa___CAPN5	-2.26633	4.07612	36.1906	1.46367e-06	0.000173416	19	4	Down-regulated
Sus_scrofa___CHCHD10	-4.45656	3.82192	32.7461	1.54206e-06	0.000181253	19	4	Down-regulated
Sus_scrofa___NR3C1	-0.957157	8.62314	35.7118	1.58997e-06	0.000184686	19	4	Down-regulated
Sus_scrofa___LRRC36	-2.40964	2.64009	33.2432	1.63826e-06	0.000189552	19	4	Down-regulated
Sus_scrofa___BIN2	-2.93911	2.31043	31.1908	1.6855e-06	0.000192758	19	4	Down-regulated
Sus_scrofa___COX5B	-3.56964	4.36719	35.0698	1.74318e-06	0.000195305	19	4	Down-regulated
Sus_scrofa___ENSSSCG00000022039	-1.41951	4.95564	35.3998	1.75028e-06	0.000195305	19	4	Down-regulated
Sus_scrofa___DCN	-1.46802	9.50581	35.2753	1.75989e-06	0.000195305	19	4	Down-regulated
Sus_scrofa___OGA	-0.957218	7.77553	35.2123	1.78649e-06	0.000196857	19	4	Down-regulated
Sus_scrofa___GRID1	-1.83369	6.45281	35.1513	1.81813e-06	0.000197881	19	4	Down-regulated
Sus_scrofa___SCD5	-1.37281	5.03478	35.2156	1.82313e-06	0.000197881	19	4	Down-regulated
Sus_scrofa___VSIG4	-2.98907	2.15109	30.413	1.82382e-06	0.000197881	19	4	Down-regulated
Sus_scrofa___ENSSSCG00000035525	-2.53391	4.44418	35.1628	1.87267e-06	0.000202439	19	4	Down-regulated
Sus_scrofa___ANGPTL1	-2.36008	3.6241	34.7748	1.9051e-06	0.000205197	19	4	Down-regulated
Sus_scrofa___CDH20	-2.49918	3.32756	34.1565	1.96498e-06	0.000209362	19	4	Down-regulated
Sus_scrofa___RET	-2.52048	3.50033	34.3988	1.97366e-06	0.000209534	19	4	Down-regulated
Sus_scrofa___CATSPERB	-2.63362	2.07037	29.9492	2.05307e-06	0.000216412	19	4	Down-regulated
Sus_scrofa___PDGFRL	-1.58602	5.8487	34.5965	2.07976e-06	0.000217677	19	4	Down-regulated
Sus_scrofa___RHEX	-4.84308	0.971621	40.0878	2.15916e-06	0.000225191	19	4	Down-regulated
Sus_scrofa___MORC4	-0.998352	7.12041	34.2642	2.23477e-06	0.000232259	19	4	Down-regulated
Sus_scrofa___APCDD1	-2.12956	3.13155	33.4221	2.33693e-06	0.000241185	19	4	Down-regulated
Sus_scrofa___ARHGAP18	-1.51497	6.39649	33.98	2.39678e-06	0.000246502	19	4	Down-regulated
Sus_scrofa___SYNE2	-1.19152	7.86027	33.7931	2.49885e-06	0.000253209	19	4	Down-regulated
Sus_scrofa___DOCK2	-3.02308	3.48314	32.9997	2.52486e-06	0.000254375	19	4	Down-regulated
Sus_scrofa___IRAG2	-2.01855	3.72672	33.6807	2.57441e-06	0.000257632	19	4	Down-regulated
Sus_scrofa___ABCA6	-2.09377	9.66818	33.6436	2.58933e-06	0.000258214	19	4	Down-regulated
Sus_scrofa___CAMK1D	-1.8031	7.77887	33.6316	2.59783e-06	0.000258214	19	4	Down-regulated
Sus_scrofa___PSIP1	-1.12823	6.498	33.5076	2.68127e-06	0.000265616	19	4	Down-regulated
Sus_scrofa___SHMT1	-2.53194	6.22035	33.4851	2.71076e-06	0.000266753	19	4	Down-regulated
Sus_scrofa___CEP43	-1.24181	5.18384	33.4761	2.73898e-06	0.000268638	19	4	Down-regulated
Sus_scrofa___ATG4C	-1.2424	6.10932	33.3938	2.76121e-06	0.000269925	19	4	Down-regulated
Sus_scrofa___KIDINS220	-0.903587	7.71112	33.2856	2.82304e-06	0.00027506	19	4	Down-regulated
Sus_scrofa___EMILIN2	-2.44744	4.11125	33.2788	2.89781e-06	0.00028142	19	4	Down-regulated
Sus_scrofa___TOP3A	-1.52745	7.55132	33.1607	2.91007e-06	0.00028159	19	4	Down-regulated
Sus_scrofa___ENSSSCG00000046937	-1.94586	4.46765	33.2103	2.97978e-06	0.000284713	19	4	Down-regulated
Sus_scrofa___TRIP13	-1.42013	4.88148	33.0869	3.03312e-06	0.000288878	19	4	Down-regulated
Sus_scrofa___PTPRD	-2.03446	8.58688	32.7239	3.23423e-06	0.000303158	19	4	Down-regulated
Sus_scrofa___OSBPL10	-1.11949	6.29234	32.7149	3.25074e-06	0.000303744	19	4	Down-regulated
Sus_scrofa___ASB9	-1.78503	4.80932	32.7679	3.29002e-06	0.000304353	19	4	Down-regulated
Sus_scrofa___TRIM7	-3.75098	1.00891	29.263	3.29351e-06	0.000304353	19	4	Down-regulated
Sus_scrofa___SP7	-2.70112	2.2512	28.898	3.32837e-06	0.000305221	19	4	Down-regulated
Sus_scrofa___SLA-DRB1	-2.58419	3.03416	31.0949	3.46798e-06	0.000315667	19	4	Down-regulated
Sus_scrofa___ENSSSCG00000023419	-0.980261	6.15678	32.4445	3.47425e-06	0.000315667	19	4	Down-regulated
Sus_scrofa___PRPSAP1	-1.36276	5.04919	32.4892	3.48982e-06	0.000316111	19	4	Down-regulated
Sus_scrofa___DIS3L2	-0.868984	8.42841	32.3358	3.55587e-06	0.000320483	19	4	Down-regulated
Sus_scrofa___TPCN1	-1.29088	5.22917	32.3916	3.55972e-06	0.000320483	19	4	Down-regulated
Sus_scrofa___AADAC	-3.3643	1.37531	27.0033	3.6113e-06	0.000324141	19	4	Down-regulated
Sus_scrofa___SH3RF2	-1.54509	5.0714	32.1925	3.75571e-06	0.000334827	19	4	Down-regulated
Sus_scrofa___ATP5MC1	-3.15893	2.95121	29.7012	3.76426e-06	0.000334827	19	4	Down-regulated
Sus_scrofa___TNNC1	-4.06418	5.41856	32.15	3.82967e-06	0.00033957	19	4	Down-regulated
Sus_scrofa___ENSSSCG00000040999	-2.3159	1.5522	26.9433	3.84871e-06	0.00033957	19	4	Down-regulated
Sus_scrofa___TCEA2	-1.28713	5.03274	31.9777	3.95663e-06	0.000346732	19	4	Down-regulated
Sus_scrofa___FIG4	-1.09431	7.22312	31.7389	4.12174e-06	0.000359076	19	4	Down-regulated
Sus_scrofa___CCDC88C	-2.11229	2.93186	30.7362	4.16363e-06	0.000360747	19	4	Down-regulated
Sus_scrofa___SLC9A7	-1.81868	4.12078	31.8308	4.16527e-06	0.000360747	19	4	Down-regulated
Sus_scrofa___INO80C	-1.63842	4.25795	31.818	4.18705e-06	0.000361575	19	4	Down-regulated
Sus_scrofa___S100A1	-3.02507	2.03809	27.1214	4.20223e-06	0.000361832	19	4	Down-regulated
Sus_scrofa___ADGRV1	-2.08184	4.55343	31.7747	4.22376e-06	0.000362216	19	4	Down-regulated
Sus_scrofa___MOK	-1.48043	4.53746	31.7581	4.23115e-06	0.000362216	19	4	Down-regulated
Sus_scrofa___ART3	-3.19972	1.77541	26.4967	4.32843e-06	0.000369476	19	4	Down-regulated
Sus_scrofa___GNLY	-6.45411	1.09997	61.8613	4.38462e-06	0.000372568	19	4	Down-regulated
Sus_scrofa___ENSSSCG00000033909	-2.9645	2.36048	28.0625	4.42744e-06	0.000374688	19	4	Down-regulated
Sus_scrofa___SLC6A4	-2.94871	5.41673	31.4879	4.49408e-06	0.00037738	19	4	Down-regulated
Sus_scrofa___RALGPS2	-1.73865	6.08942	31.4056	4.49748e-06	0.00037738	19	4	Down-regulated
Sus_scrofa___TSPAN11	-2.25981	4.35226	31.4818	4.53566e-06	0.000379314	19	4	Down-regulated
Sus_scrofa___ENSSSCG00000041213	-2.60995	5.42943	31.4273	4.54614e-06	0.000379314	19	4	Down-regulated
Sus_scrofa___BMPER	-1.02595	7.14461	31.3033	4.59331e-06	0.000382173	19	4	Down-regulated
Sus_scrofa___AMOT	-1.40794	5.60466	31.2974	4.6373e-06	0.000383678	19	4	Down-regulated
Sus_scrofa___ITGB2	-3.14376	1.28043	26.1826	4.65578e-06	0.000384134	19	4	Down-regulated
Sus_scrofa___CADM1	-2.26431	5.12102	31.3287	4.67168e-06	0.000384376	19	4	Down-regulated
Sus_scrofa___GFRA1	-2.49462	5.76033	31.1744	4.80184e-06	0.000393991	19	4	Down-regulated
Sus_scrofa___ITGB6	-3.30751	2.01142	26.4442	4.8259e-06	0.00039487	19	4	Down-regulated
Sus_scrofa___EIF4E3	-0.886903	6.63062	31.0088	4.94856e-06	0.000402683	19	4	Down-regulated
Sus_scrofa___AP3M2	-2.11636	2.43454	28.8027	4.98865e-06	0.000404832	19	4	Down-regulated
Sus_scrofa___REV1	-1.58702	9.29376	30.9329	5.03604e-06	0.000407562	19	4	Down-regulated
Sus_scrofa___ENSSSCG00000043817	-1.36457	8.54337	30.8881	5.09334e-06	0.000411076	19	4	Down-regulated
Sus_scrofa___HPGD	-2.47826	8.30502	30.8141	5.19001e-06	0.000417739	19	4	Down-regulated
Sus_scrofa___MUSK	-2.06533	4.66332	30.8683	5.28037e-06	0.000423699	19	4	Down-regulated
Sus_scrofa___TNRC18	-1.02525	6.62583	30.7416	5.29267e-06	0.000423699	19	4	Down-regulated
Sus_scrofa___TMEM244	-3.26208	1.26936	25.9389	5.37524e-06	0.000425708	19	4	Down-regulated
Sus_scrofa___MFAP5	-1.47335	8.5976	30.6534	5.40347e-06	0.000426802	19	4	Down-regulated
Sus_scrofa___MYL2	-4.07244	6.44982	30.7077	5.43732e-06	0.000428333	19	4	Down-regulated
Sus_scrofa___HTR7	-2.42698	3.08914	29.7395	5.6165e-06	0.000437792	19	4	Down-regulated
Sus_scrofa___ENSSSCG00000029553	-1.11873	5.79938	30.4836	5.67286e-06	0.000438701	19	4	Down-regulated
Sus_scrofa___TXLNB	-3.13824	2.44251	27.0166	5.69692e-06	0.000438701	19	4	Down-regulated
Sus_scrofa___DBP	-2.99584	1.72701	25.6656	5.7572e-06	0.000440642	19	4	Down-regulated
Sus_scrofa___RPIA	-1.43618	4.56628	30.3579	5.99299e-06	0.00045515	19	4	Down-regulated
Sus_scrofa___EVC	-1.04407	6.07334	30.252	6.00364e-06	0.00045515	19	4	Down-regulated
Sus_scrofa___ENSSSCG00000027196	-4.31256	0.881233	31.5572	6.02359e-06	0.00045515	19	4	Down-regulated
Sus_scrofa___KIAA1109	-1.00602	7.35989	30.1666	6.11546e-06	0.000459746	19	4	Down-regulated
Sus_scrofa___ADAM22	-2.57959	7.35397	30.1256	6.1846e-06	0.000462596	19	4	Down-regulated
Sus_scrofa___ITGB5	-1.20362	7.44011	29.9988	6.38262e-06	0.000473818	19	4	Down-regulated
Sus_scrofa___NT5E	-1.65557	3.69071	30.034	6.42342e-06	0.000475655	19	4	Down-regulated
Sus_scrofa___ENSSSCG00000006452	-2.3363	1.86011	25.9893	6.49362e-06	0.000479653	19	4	Down-regulated
Sus_scrofa___DOCK8	-2.20847	3.7061	29.8449	6.60198e-06	0.000484413	19	4	Down-regulated
Sus_scrofa___ENSSSCG00000035989	-2.53295	1.98294	26.1144	6.60711e-06	0.000484413	19	4	Down-regulated
Sus_scrofa___BAZ2B	-0.972956	9.27126	29.824	6.67135e-06	0.000487915	19	4	Down-regulated
Sus_scrofa___CLK1	-1.00857	7.96773	29.7232	6.84699e-06	0.000498299	19	4	Down-regulated
Sus_scrofa___ACSF2	-1.22186	6.55375	29.6897	6.9179e-06	0.000499776	19	4	Down-regulated
Sus_scrofa___ENSSSCG00000032129	-2.75597	3.56695	29.2359	6.98252e-06	0.000501996	19	4	Down-regulated
Sus_scrofa___QSOX1	-1.44578	5.23262	29.6172	7.13397e-06	0.000510406	19	4	Down-regulated
Sus_scrofa___RAP1GAP2	-2.96835	2.77504	27.5975	7.27988e-06	0.00051959	19	4	Down-regulated
Sus_scrofa___STING1	-2.49783	1.81687	25.3703	7.34173e-06	0.000522745	19	4	Down-regulated
Sus_scrofa___CPT1B	-3.74763	1.89091	24.7664	7.62774e-06	0.000541808	19	4	Down-regulated
Sus_scrofa___CCDC171	-1.36711	5.27682	29.3167	7.69914e-06	0.000543626	19	4	Down-regulated
Sus_scrofa___FCHSD1	-1.65704	3.58274	29.2742	7.7084e-06	0.000543626	19	4	Down-regulated
Sus_scrofa___ENSSSCG00000038991	-1.64367	3.85531	29.3263	7.77378e-06	0.000546404	19	4	Down-regulated
Sus_scrofa___GIMAP4	-2.97847	1.3043	24.6428	7.78469e-06	0.000546404	19	4	Down-regulated
Sus_scrofa___NME9	-2.34109	1.95716	25.5587	7.93986e-06	0.000555978	19	4	Down-regulated
Sus_scrofa___CRYM	-2.80591	1.79043	24.8722	8.00152e-06	0.000558974	19	4	Down-regulated
Sus_scrofa___CARD11	-2.87384	2.20559	25.7846	8.04886e-06	0.000560958	19	4	Down-regulated
Sus_scrofa___ENSSSCG00000037775	-2.3236	2.13693	26.1771	8.27007e-06	0.000572946	19	4	Down-regulated
Sus_scrofa___ZNF879	-1.09089	5.14237	29.0285	8.30346e-06	0.000572946	19	4	Down-regulated
Sus_scrofa___KIF3B	-1.39924	5.78093	28.9948	8.31436e-06	0.000572946	19	4	Down-regulated
Sus_scrofa___KIN	-0.927052	6.82878	28.8698	8.54484e-06	0.00058135	19	4	Down-regulated
Sus_scrofa___KCNS3	-2.71612	2.98393	27.5579	8.57295e-06	0.00058135	19	4	Down-regulated
Sus_scrofa___ITM2B	-1.10919	6.99385	28.842	8.60523e-06	0.000581934	19	4	Down-regulated
Sus_scrofa___VAMP5	-1.3755	5.60616	28.8175	8.72221e-06	0.000586397	19	4	Down-regulated
Sus_scrofa___SORCS1	-2.20277	3.39942	28.5302	8.75042e-06	0.000586397	19	4	Down-regulated
Sus_scrofa___ENSSSCG00000007944	-1.73644	4.02574	28.8354	8.86311e-06	0.000592608	19	4	Down-regulated
Sus_scrofa___SIRPB2	-4.61386	0.797287	35.6272	9.0205e-06	0.000598357	19	4	Down-regulated
Sus_scrofa___ENSSSCG00000033648	-1.48242	5.77709	28.679	9.02989e-06	0.000598357	19	4	Down-regulated
Sus_scrofa___CACHD1	-1.01697	6.61525	28.625	9.11284e-06	0.000601164	19	4	Down-regulated
Sus_scrofa___A2M	-2.68749	1.8182	24.3682	9.88618e-06	0.000647851	19	4	Down-regulated
Sus_scrofa___CROCC	-1.3515	4.16755	28.3739	1.00375e-05	0.000653769	19	4	Down-regulated
Sus_scrofa___CAPN6	-2.61366	1.98772	24.7717	1.01263e-05	0.000657768	19	4	Down-regulated
Sus_scrofa___GALNT1	-0.824677	8.16851	28.1749	1.02429e-05	0.000663032	19	4	Down-regulated
Sus_scrofa___CD84	-2.63572	1.25406	23.7976	1.03099e-05	0.000663946	19	4	Down-regulated
Sus_scrofa___GP91-PHOX	-2.91137	1.7635	24.2185	1.03132e-05	0.000663946	19	4	Down-regulated
Sus_scrofa___ADGRD1	-1.03521	10.3749	28.1154	1.04033e-05	0.000666983	19	4	Down-regulated
Sus_scrofa___ENSSSCG00000022773	-1.45582	5.09097	28.0935	1.06289e-05	0.00067415	19	4	Down-regulated
Sus_scrofa___ENSSSCG00000013436	-3.45271	4.29017	27.8385	1.06861e-05	0.000676328	19	4	Down-regulated
Sus_scrofa___FGF13	-3.4278	3.77965	27.3206	1.07103e-05	0.000676415	19	4	Down-regulated
Sus_scrofa___RNF217	-0.89052	7.62166	27.9064	1.09984e-05	0.000691664	19	4	Down-regulated
Sus_scrofa___USP22	-0.972434	5.30899	27.8829	1.11763e-05	0.000699875	19	4	Down-regulated
Sus_scrofa___SYTL3	-2.54129	2.02036	24.6313	1.12724e-05	0.000702921	19	4	Down-regulated
Sus_scrofa___KIF3A	-0.786236	6.95105	27.7854	1.13636e-05	0.000707123	19	4	Down-regulated
Sus_scrofa___RAB30	-1.62991	6.76783	27.6751	1.17095e-05	0.000725596	19	4	Down-regulated
Sus_scrofa___RAC3	-1.58942	3.40567	27.5669	1.18562e-05	0.000731629	19	4	Down-regulated
Sus_scrofa___IRF5	-2.50508	2.01542	24.3578	1.23217e-05	0.000752516	19	4	Down-regulated
Sus_scrofa___PDE1A	-1.22523	9.68672	27.4522	1.24086e-05	0.000756264	19	4	Down-regulated
Sus_scrofa___FEZ1	-2.31354	1.57656	23.4946	1.2774e-05	0.000774275	19	4	Down-regulated
Sus_scrofa___CEP162	-1.01562	7.05834	27.3439	1.27826e-05	0.000774275	19	4	Down-regulated
Sus_scrofa___PRKCQ	-2.49699	1.86148	23.8615	1.29911e-05	0.000781308	19	4	Down-regulated
Sus_scrofa___CENPK	-2.54121	1.18182	23.1512	1.29988e-05	0.000781308	19	4	Down-regulated
Sus_scrofa___LAX1	-2.67598	1.46981	23.2474	1.31095e-05	0.000781308	19	4	Down-regulated
Sus_scrofa___ARHGAP6	-1.22076	8.2163	27.2475	1.31097e-05	0.000781308	19	4	Down-regulated
Sus_scrofa___GAS2	-1.79822	4.26814	27.3059	1.32891e-05	0.000788826	19	4	Down-regulated
Sus_scrofa___CD2	-5.42814	0.898885	39.9632	1.33652e-05	0.000791386	19	4	Down-regulated
Sus_scrofa___APBB1IP	-1.85709	3.60598	27.1343	1.35474e-05	0.000797763	19	4	Down-regulated
Sus_scrofa___TESK2	-1.16661	4.94959	27.1776	1.35763e-05	0.000797876	19	4	Down-regulated
Sus_scrofa___PACS2	-1.12533	5.24012	27.1244	1.37014e-05	0.000803632	19	4	Down-regulated
Sus_scrofa___EZH1	-1.39217	6.59956	26.9658	1.4164e-05	0.000824237	19	4	Down-regulated
Papio_anubis_FXYD1	-4.68837	0.818736	33.1631	1.46242e-05	0.000848203	19	4	Down-regulated
Sus_scrofa___NDUFB11	-2.7123	2.35975	24.2082	1.48537e-05	0.000857637	19	4	Down-regulated
Sus_scrofa___PIK3IP1	-1.92584	3.66435	26.7629	1.49595e-05	0.00086039	19	4	Down-regulated
Sus_scrofa___CCDC28B	-1.80792	3.79547	26.7061	1.54039e-05	0.00087912	19	4	Down-regulated
Sus_scrofa___RNF150	-2.17792	6.52802	26.5398	1.59161e-05	0.000903132	19	4	Down-regulated
Sus_scrofa___VSIG10	-1.57371	5.55012	26.5273	1.60602e-05	0.000908798	19	4	Down-regulated
Sus_scrofa___MATN2	-1.48335	7.58275	26.4875	1.61038e-05	0.000908798	19	4	Down-regulated
Sus_scrofa___ACCS	-1.11468	5.55691	26.5036	1.61401e-05	0.000908877	19	4	Down-regulated
Sus_scrofa___VSTM1	-2.81661	1.01549	22.8	1.62515e-05	0.000913415	19	4	Down-regulated
Sus_scrofa___LHFPL1	-2.13177	1.78762	23.2193	1.63511e-05	0.000916556	19	4	Down-regulated
Sus_scrofa___FBN1	-0.930962	10.5549	26.4261	1.63693e-05	0.000916556	19	4	Down-regulated
Sus_scrofa___SASH1	-1.05833	9.79361	26.3546	1.66916e-05	0.00093062	19	4	Down-regulated
Sus_scrofa___FAM53B	-0.87089	7.27411	26.3464	1.67374e-05	0.00093062	19	4	Down-regulated
Sus_scrofa___GPR1	-1.54048	6.97882	26.3461	1.67461e-05	0.00093062	19	4	Down-regulated
Sus_scrofa___TNNT2	-3.69765	5.69322	26.3922	1.69322e-05	0.000939196	19	4	Down-regulated
Sus_scrofa___SMARCA2	-0.90332	7.73722	26.2873	1.70054e-05	0.000940096	19	4	Down-regulated
Sus_scrofa___OSCP1	-1.14919	4.67222	26.3631	1.70119e-05	0.000940096	19	4	Down-regulated
Sus_scrofa___OGFRL1	-1.46959	3.85085	26.3597	1.70916e-05	0.000942742	19	4	Down-regulated
Sus_scrofa___MYH7B	-3.6401	2.87884	23.6911	1.75378e-05	0.000961981	19	4	Down-regulated
Sus_scrofa___ENSSSCG00000036618	-2.78406	1.73189	22.6465	1.76594e-05	0.000965079	19	4	Down-regulated
Sus_scrofa___ENSSSCG00000032552	-0.844769	6.47764	26.0717	1.80646e-05	0.000981265	19	4	Down-regulated
Sus_scrofa___PCDH9	-1.62194	7.653	26.046	1.81695e-05	0.000983876	19	4	Down-regulated
Sus_scrofa___ABLIM1	-1.85076	8.6134	26.0274	1.8258e-05	0.000986865	19	4	Down-regulated
Sus_scrofa___NRK	-2.12473	4.77359	26.0036	1.88188e-05	0.00101348	19	4	Down-regulated
Sus_scrofa___NTN5	-1.82728	2.91272	25.3215	1.9113e-05	0.00102559	19	4	Down-regulated
Sus_scrofa___ENSSSCG00000051742	-2.61314	1.78875	22.4257	1.95095e-05	0.00104309	19	4	Down-regulated
Sus_scrofa___NEDD4	-1.05291	7.40771	25.7766	1.9569e-05	0.00104439	19	4	Down-regulated
Sus_scrofa___DUSP11	-0.924228	6.86844	25.7125	1.99286e-05	0.00105786	19	4	Down-regulated
Sus_scrofa___TLL2	-2.61488	3.29362	25.1629	2.00466e-05	0.00106222	19	4	Down-regulated
Sus_scrofa___MN1	-1.18363	5.85809	25.6641	2.0267e-05	0.00106903	19	4	Down-regulated
Sus_scrofa___ATOH8	-1.96126	4.11749	25.6813	2.0587e-05	0.00107927	19	4	Down-regulated
Sus_scrofa___ENSSSCG00000040016	-2.71612	2.39436	23.5696	2.0705e-05	0.00107991	19	4	Down-regulated
Sus_scrofa___SNX29	-0.96279	7.66404	25.5703	2.07154e-05	0.00107991	19	4	Down-regulated
Sus_scrofa___NCR1	-3.84737	0.753656	26.1792	2.08226e-05	0.00107991	19	4	Down-regulated
Sus_scrofa___GALNS	-1.11946	5.19389	25.5883	2.08369e-05	0.00107991	19	4	Down-regulated
Sus_scrofa___CCK	-3.97404	1.07912	23.6963	2.08545e-05	0.00107991	19	4	Down-regulated
Sus_scrofa___DEPDC4	-2.07812	2.24798	23.5632	2.09133e-05	0.00108107	19	4	Down-regulated
Sus_scrofa___CD200R1	-2.30106	2.02577	22.924	2.12327e-05	0.00109001	19	4	Down-regulated
Sus_scrofa___DEUP1	-1.65567	6.07424	25.4821	2.13071e-05	0.00109164	19	4	Down-regulated
Sus_scrofa___BMP5	-2.97885	4.21144	25.4506	2.1372e-05	0.00109164	19	4	Down-regulated
Sus_scrofa___NAA60	-0.858445	6.06464	25.4622	2.14028e-05	0.00109164	19	4	Down-regulated
Sus_scrofa___ENSSSCG00000034866	-2.65413	2.7716	24.1374	2.14126e-05	0.00109164	19	4	Down-regulated
Sus_scrofa___TMPO	-1.56753	4.41251	25.5275	2.15096e-05	0.00109411	19	4	Down-regulated
Sus_scrofa___ENSSSCG00000016791	-3.2502	1.50625	21.8343	2.1535e-05	0.00109411	19	4	Down-regulated
Sus_scrofa___ENSSSCG00000033570	-1.52098	3.73474	25.459	2.17681e-05	0.00110406	19	4	Down-regulated
Sus_scrofa___ENSSSCG00000026264	-2.5284	0.961	21.9079	2.19181e-05	0.00110788	19	4	Down-regulated
Sus_scrofa___HDAC4	-1.05962	7.08128	25.3239	2.21912e-05	0.00111977	19	4	Down-regulated
Sus_scrofa___ANKRD13A	-0.954365	6.41486	25.2642	2.25882e-05	0.00113593	19	4	Down-regulated
Sus_scrofa___NME7	-1.22453	6.26178	25.2443	2.27286e-05	0.00114105	19	4	Down-regulated
Sus_scrofa___PRDM16	-3.22027	2.09471	22.0915	2.27757e-05	0.00114148	19	4	Down-regulated
Sus_scrofa___BEX3	-1.80752	3.25231	24.7698	2.44855e-05	0.00121484	19	4	Down-regulated
Sus_scrofa___DNAAF4	-1.48883	4.19822	25.0548	2.45664e-05	0.00121682	19	4	Down-regulated
Sus_scrofa___TNRC6B	-0.802343	9.17515	24.9168	2.48516e-05	0.00122889	19	4	Down-regulated
Sus_scrofa___RFTN2	-1.19616	6.87563	24.8244	2.55265e-05	0.00125597	19	4	Down-regulated
Sus_scrofa___CAPRIN2	-1.31711	5.32922	24.8471	2.55878e-05	0.0012569	19	4	Down-regulated
Sus_scrofa___SPOCK2	-1.85495	2.35135	23.3183	2.60517e-05	0.00126916	19	4	Down-regulated
Sus_scrofa___TOM1L1	-1.50704	4.94959	24.7831	2.62202e-05	0.00127528	19	4	Down-regulated
Sus_scrofa___RAB11FIP3	-0.967041	7.06924	24.6674	2.66736e-05	0.00129503	19	4	Down-regulated
Sus_scrofa___CNTN4	-2.2295	4.37932	24.723	2.69032e-05	0.00129977	19	4	Down-regulated
Sus_scrofa___CD247	-1.78743	3.72501	24.6652	2.69433e-05	0.00129977	19	4	Down-regulated
Sus_scrofa___AIF1	-2.34656	1.56722	21.3324	2.7662e-05	0.00133011	19	4	Down-regulated
Sus_scrofa___RCBTB2	-0.875191	7.4117	24.5216	2.77872e-05	0.00133397	19	4	Down-regulated
Sus_scrofa___COX7C	-2.60193	4.11022	24.5321	2.78673e-05	0.00133565	19	4	Down-regulated
Sus_scrofa___FBH1	-0.917441	7.27265	24.4884	2.80529e-05	0.0013402	19	4	Down-regulated
Sus_scrofa___CDK14	-0.961471	10.4258	24.4585	2.82782e-05	0.00134693	19	4	Down-regulated
Sus_scrofa___GPR176	-1.65305	6.46779	24.4636	2.82963e-05	0.00134693	19	4	Down-regulated
Sus_scrofa___RAB32	-1.23587	5.8953	24.4662	2.83301e-05	0.00134693	19	4	Down-regulated
Sus_scrofa___ICA1L	-1.68846	3.17101	24.182	2.89207e-05	0.00136541	19	4	Down-regulated
Sus_scrofa___BTBD8	-1.73342	4.36533	24.4687	2.89233e-05	0.00136541	19	4	Down-regulated
Sus_scrofa___ENSSSCG00000038540	-2.13796	4.17135	24.4198	2.9217e-05	0.00137585	19	4	Down-regulated
Sus_scrofa___CLNK	-3.24331	1.22001	21.1522	2.92814e-05	0.00137605	19	4	Down-regulated
Sus_scrofa___OSBPL9	-0.842754	8.07387	24.1614	3.07727e-05	0.00143542	19	4	Down-regulated
Sus_scrofa___DPP8	-0.740811	7.43815	24.1029	3.12954e-05	0.0014575	19	4	Down-regulated
Sus_scrofa___CYTH2	-1.06748	5.96758	24.0626	3.17539e-05	0.00147653	19	4	Down-regulated
Sus_scrofa___DENND2C	-0.798007	6.31465	24.0456	3.18595e-05	0.00147737	19	4	Down-regulated
Sus_scrofa___LAPTM5	-2.11314	1.97127	21.7078	3.18717e-05	0.00147737	19	4	Down-regulated
Sus_scrofa___NCOA1	-1.05647	8.28974	23.9818	3.23902e-05	0.00149672	19	4	Down-regulated
Sus_scrofa___PRKAG2	-1.24313	8.30568	23.9532	3.26562e-05	0.00150432	19	4	Down-regulated
Sus_scrofa___NHSL2	-1.26144	6.87375	23.9454	3.27551e-05	0.00150653	19	4	Down-regulated
Sus_scrofa___ENSSSCG00000048841	-2.4844	2.33668	22.1156	3.2949e-05	0.00151076	19	4	Down-regulated
Sus_scrofa___ENSSSCG00000049439	-2.62038	1.82033	20.9986	3.3418e-05	0.00152989	19	4	Down-regulated
Sus_scrofa___ENSSSCG00000036052	-3.58464	4.42866	23.7503	3.35887e-05	0.00153266	19	4	Down-regulated
Sus_scrofa___KREMEN1	-1.22277	4.74134	23.9126	3.36322e-05	0.00153266	19	4	Down-regulated
Sus_scrofa___RPGRIP1	-1.49559	3.58641	23.8169	3.42102e-05	0.00155529	19	4	Down-regulated
Sus_scrofa___CERT1	-0.918944	7.51593	23.7875	3.42514e-05	0.00155529	19	4	Down-regulated
Sus_scrofa___FYN	-0.962258	9.27993	23.7829	3.42877e-05	0.00155529	19	4	Down-regulated
Sus_scrofa___ENSSSCG00000047920	-1.75672	5.48813	23.7449	3.49589e-05	0.00158089	19	4	Down-regulated
Sus_scrofa___ABI3BP	-2.18707	8.23799	23.7078	3.5041e-05	0.00158218	19	4	Down-regulated
Sus_scrofa___CEP135	-0.913081	6.4342	23.6726	3.54447e-05	0.00159555	19	4	Down-regulated
Sus_scrofa___ARHGAP30	-2.64086	1.39719	20.4414	3.57182e-05	0.00160318	19	4	Down-regulated
Sus_scrofa___ENSSSCG00000048674	-3.2595	1.46066	20.4761	3.57224e-05	0.00160318	19	4	Down-regulated
Sus_scrofa___GPIHBP1	-2.7672	2.60659	22.058	3.59399e-05	0.00160751	19	4	Down-regulated
Sus_scrofa___STON2	-1.43113	8.21901	23.6116	3.60222e-05	0.00160751	19	4	Down-regulated
Sus_scrofa___ENSSSCG00000010190	-3.55198	4.82118	23.6528	3.6036e-05	0.00160751	19	4	Down-regulated
Sus_scrofa___CATSPERG	-1.34902	5.42167	23.6042	3.6383e-05	0.00161812	19	4	Down-regulated
Sus_scrofa___ENSSSCG00000039339	-2.19498	2.80373	22.8083	3.65532e-05	0.00162093	19	4	Down-regulated
Sus_scrofa___PDE1B	-2.49372	1.23032	20.3032	3.69312e-05	0.00163269	19	4	Down-regulated
Sus_scrofa___PDE9A	-1.60171	3.65125	23.5409	3.70697e-05	0.00163637	19	4	Down-regulated
Sus_scrofa___DDX17	-0.803208	9.09032	23.4898	3.73063e-05	0.00164145	19	4	Down-regulated
Sus_scrofa___ZNF831	-2.25429	3.62663	23.4028	3.74021e-05	0.00164145	19	4	Down-regulated
Sus_scrofa___CCDC150	-0.980166	5.59357	23.4435	3.80163e-05	0.00165342	19	4	Down-regulated
Sus_scrofa___PEPD	-1.01547	5.29784	23.453	3.80191e-05	0.00165342	19	4	Down-regulated
Sus_scrofa___TMEFF2	-2.71377	7.92321	23.4217	3.80648e-05	0.00165342	19	4	Down-regulated
Papio_anubis_ACTA1	-4.14667	0.854492	24.0948	3.81832e-05	0.00165413	19	4	Down-regulated
Sus_scrofa___CETN3	-1.20864	5.36499	23.4361	3.81979e-05	0.00165413	19	4	Down-regulated
Sus_scrofa___SPINT2	-2.16949	1.95718	21.0275	3.88794e-05	0.00167385	19	4	Down-regulated
Sus_scrofa___DTX4	-1.75916	5.55818	23.3398	3.92544e-05	0.00168462	19	4	Down-regulated
Sus_scrofa___MKS1	-1.17345	3.91984	23.3947	3.93171e-05	0.00168462	19	4	Down-regulated
Sus_scrofa___NDUFA4	-3.40355	5.21751	23.3581	3.9631e-05	0.00169146	19	4	Down-regulated
Sus_scrofa___DIP2A	-0.985278	6.70702	23.275	3.97391e-05	0.00169363	19	4	Down-regulated
Sus_scrofa___ENSSSCG00000049172	-2.20542	2.06768	21.0965	4.05883e-05	0.00172734	19	4	Down-regulated
Sus_scrofa___LLGL1	-1.15031	4.97067	23.2099	4.09888e-05	0.00173689	19	4	Down-regulated
Sus_scrofa___SLC4A11	-2.29209	2.333	21.5088	4.14971e-05	0.00175341	19	4	Down-regulated
Sus_scrofa___ANKRD55	-1.4625	4.11502	23.1249	4.25015e-05	0.0017882	19	4	Down-regulated
Sus_scrofa___PDE4D	-1.25478	9.63715	23.0256	4.26857e-05	0.00179341	19	4	Down-regulated
Papio_anubis_TNNT2	-4.71041	0.704666	30.3219	4.28535e-05	0.0017979	19	4	Down-regulated
Sus_scrofa___VAV1	-2.30105	2.52348	21.7605	4.46575e-05	0.00185734	19	4	Down-regulated
Sus_scrofa___ATP5ME	-2.58253	4.3837	22.9294	4.4748e-05	0.00185734	19	4	Down-regulated
Sus_scrofa___PRTFDC1	-0.921814	6.19605	22.8428	4.51202e-05	0.00186657	19	4	Down-regulated
Sus_scrofa___RASGEF1B	-1.07854	7.06168	22.827	4.52611e-05	0.00186978	19	4	Down-regulated
Sus_scrofa___FLT3	-2.10059	1.87178	20.5591	4.542e-05	0.00187037	19	4	Down-regulated
Sus_scrofa___CREBBP	-0.721837	8.73152	22.8098	4.54649e-05	0.00187037	19	4	Down-regulated
Sus_scrofa___ENSSSCG00000027349	-1.33786	4.91143	22.7968	4.62831e-05	0.00189351	19	4	Down-regulated
Sus_scrofa___ENSSSCG00000027790	-1.87213	4.8754	22.7363	4.72471e-05	0.00192498	19	4	Down-regulated
Sus_scrofa___FAM102B	-1.19863	6.48899	22.6766	4.73425e-05	0.00192621	19	4	Down-regulated
Sus_scrofa___ENSSSCG00000032003	-1.53827	4.82626	22.7202	4.74349e-05	0.00192733	19	4	Down-regulated
Sus_scrofa___CDH8	-3.14154	1.20495	19.842	4.79343e-05	0.00194229	19	4	Down-regulated
Sus_scrofa___EPHA3	-1.61575	6.56798	22.6237	4.80888e-05	0.00194589	19	4	Down-regulated
Sus_scrofa___HPSE2	-1.89799	6.54071	22.5727	4.8834e-05	0.00195918	19	4	Down-regulated
Sus_scrofa___ND6	-2.36285	4.00048	22.5889	4.89189e-05	0.00195918	19	4	Down-regulated
Sus_scrofa___CDK18	-3.61043	0.900237	21.0567	4.89464e-05	0.00195918	19	4	Down-regulated
Sus_scrofa___IST1	-0.788874	6.39653	22.5279	4.94602e-05	0.00197707	19	4	Down-regulated
Sus_scrofa___CD48	-4.44078	0.644562	28.9499	4.96225e-05	0.00198089	19	4	Down-regulated
Sus_scrofa___CNNM3	-1.10227	4.90387	22.5244	5.00965e-05	0.00199712	19	4	Down-regulated
Sus_scrofa___LRFN5	-1.97098	4.88598	22.5322	5.01947e-05	0.00199834	19	4	Down-regulated
Sus_scrofa___DOCK10	-1.21611	7.34031	22.4515	5.05326e-05	0.00200521	19	4	Down-regulated
Sus_scrofa___DOP1B	-0.862532	6.87173	22.4398	5.07246e-05	0.00200523	19	4	Down-regulated
Sus_scrofa___CD6	-3.39786	0.773288	21.3216	5.07397e-05	0.00200523	19	4	Down-regulated
Sus_scrofa___NLRC3	-2.25603	1.90256	20.164	5.07738e-05	0.00200523	19	4	Down-regulated
Sus_scrofa___FRMD3	-1.90928	8.50871	22.4221	5.09575e-05	0.0020084	19	4	Down-regulated
Sus_scrofa___DNMBP	-0.762967	7.30024	22.4209	5.09897e-05	0.0020084	19	4	Down-regulated
Sus_scrofa___LCP1	-2.1472	3.12318	22.0672	5.16996e-05	0.00203366	19	4	Down-regulated
Sus_scrofa___ENSSSCG00000028572	-1.70837	5.54741	22.376	5.20271e-05	0.0020415	19	4	Down-regulated
Sus_scrofa___AURKB	-1.7413	3.39483	22.2734	5.21756e-05	0.00204174	19	4	Down-regulated
Sus_scrofa___RAPGEF1	-0.816845	7.09095	22.3236	5.24839e-05	0.00205089	19	4	Down-regulated
Sus_scrofa___SLC9C2	-1.94555	2.73292	21.5725	5.28433e-05	0.0020595	19	4	Down-regulated
Sus_scrofa___KCTD19	-3.15452	1.15531	19.5598	5.30827e-05	0.00206357	19	4	Down-regulated
Sus_scrofa___ADRB2	-3.18382	0.794492	20.6911	5.31496e-05	0.00206357	19	4	Down-regulated
Sus_scrofa___ADD1	-0.685836	7.95155	22.276	5.3209e-05	0.00206357	19	4	Down-regulated
Sus_scrofa___ENSSSCG00000022236	-2.16529	1.99165	20.2124	5.3946e-05	0.00208802	19	4	Down-regulated
Sus_scrofa___EPOR	-3.40226	0.983177	20.0849	5.54415e-05	0.00212717	19	4	Down-regulated
Sus_scrofa___ABCB5	-2.3394	2.50238	20.8452	5.6438e-05	0.00215702	19	4	Down-regulated
Sus_scrofa___ENSSSCG00000043303	-4.57791	0.545633	30.6119	5.70033e-05	0.00217582	19	4	Down-regulated
Sus_scrofa___ESRRG	-3.23479	3.49277	21.4293	5.71662e-05	0.00217923	19	4	Down-regulated
Sus_scrofa___SLC19A1	-1.66674	3.49912	22.0082	5.72835e-05	0.0021809	19	4	Down-regulated
Sus_scrofa___COX6A2	-1.33147	6.07747	22.0273	5.74367e-05	0.00218392	19	4	Down-regulated
Sus_scrofa___NUP210	-3.1453	1.13153	19.3572	5.81191e-05	0.00220704	19	4	Down-regulated
Sus_scrofa___VEGFD	-2.13356	7.0027	21.9572	5.85499e-05	0.00222055	19	4	Down-regulated
Sus_scrofa___AGAP3	-1.0973	7.09395	21.918	5.92059e-05	0.00223684	19	4	Down-regulated
Sus_scrofa___RUNX3	-3.22909	0.964873	19.6701	6.0156e-05	0.00226783	19	4	Down-regulated
Sus_scrofa___MTMR14	-0.905718	6.62784	21.865	6.01794e-05	0.00226783	19	4	Down-regulated
Sus_scrofa___OCLN	-1.84797	2.0087	19.9947	6.11079e-05	0.00229944	19	4	Down-regulated
Sus_scrofa___RASAL3	-3.47861	0.819622	20.7319	6.11735e-05	0.00229944	19	4	Down-regulated
Sus_scrofa___TMEM269	-1.97562	2.94089	21.3169	6.18891e-05	0.00231997	19	4	Down-regulated
Sus_scrofa___ENSSSCG00000022724	-1.73119	2.60059	21.0163	6.19547e-05	0.00231997	19	4	Down-regulated
Papio_anubis_MYH6	-3.96332	1.18285	20.0131	6.23546e-05	0.0023251	19	4	Down-regulated
Sus_scrofa___FBLN5	-1.90857	7.84873	21.7077	6.30301e-05	0.00233954	19	4	Down-regulated
Sus_scrofa___FAM209B	-2.49259	1.10178	18.9293	6.31986e-05	0.00234184	19	4	Down-regulated
Sus_scrofa___IGF2R	-0.862457	7.14043	21.6968	6.32501e-05	0.00234184	19	4	Down-regulated
Sus_scrofa___C4BPA	-2.63523	1.16133	18.9004	6.34336e-05	0.0023457	19	4	Down-regulated
Sus_scrofa___CAMKK2	-1.55481	5.89966	21.6642	6.40859e-05	0.00236392	19	4	Down-regulated
Sus_scrofa___LMX1A	-1.82272	6.28674	21.6507	6.42665e-05	0.00236763	19	4	Down-regulated
Sus_scrofa___FAM200A	-1.49842	4.39195	21.6914	6.46737e-05	0.00237661	19	4	Down-regulated
Sus_scrofa___SCN9A	-2.02637	2.19312	19.9749	6.5419e-05	0.00239519	19	4	Down-regulated
Sus_scrofa___ACE	-1.53664	2.589	20.9099	6.55767e-05	0.00239641	19	4	Down-regulated
Sus_scrofa___SELENOP	-1.78859	6.47169	21.5792	6.5614e-05	0.00239641	19	4	Down-regulated
Sus_scrofa___GLE1	-0.985418	4.94562	21.5968	6.59194e-05	0.0024046	19	4	Down-regulated
Sus_scrofa___ADGRL3	-1.71809	4.0498	21.6068	6.63007e-05	0.00241256	19	4	Down-regulated
Sus_scrofa___TMEM35B	-2.02677	1.5333	18.9587	6.67849e-05	0.00242423	19	4	Down-regulated
Sus_scrofa___CD226	-2.18176	2.17978	19.8928	6.73808e-05	0.00244286	19	4	Down-regulated
Sus_scrofa___FAM117A	-1.21566	6.04019	21.4662	6.79417e-05	0.00245718	19	4	Down-regulated
Sus_scrofa___CD22	-4.8524	0.59258	29.8826	6.86845e-05	0.00247498	19	4	Down-regulated
Sus_scrofa___MGP	-0.996532	8.91034	21.4096	6.89257e-05	0.00248066	19	4	Down-regulated
Sus_scrofa___U2SURP	-0.770883	8.03669	21.3663	6.98378e-05	0.00250739	19	4	Down-regulated
Sus_scrofa___SLC27A6	-2.06445	7.00495	21.3478	7.02901e-05	0.00252057	19	4	Down-regulated
Sus_scrofa___ENSSSCG00000023771	-1.31138	5.40158	21.3022	7.17028e-05	0.00256812	19	4	Down-regulated
Sus_scrofa___ZCCHC14	-0.766619	7.6708	21.2598	7.21287e-05	0.00257714	19	4	Down-regulated
Sus_scrofa___ITIH5	-2.1038	8.19046	21.2199	7.30034e-05	0.00260212	19	4	Down-regulated
Sus_scrofa___ZFYVE1	-0.910408	6.25053	21.2157	7.32124e-05	0.00260621	19	4	Down-regulated
Sus_scrofa___THEMIS	-2.07544	2.28339	19.8629	7.34699e-05	0.00260621	19	4	Down-regulated
Sus_scrofa___COQ8A	-2.98902	3.33988	20.6321	7.34701e-05	0.00260621	19	4	Down-regulated
Sus_scrofa___C20orf194	-0.939346	8.12303	21.1807	7.38694e-05	0.00261724	19	4	Down-regulated
Sus_scrofa___SMARCA1	-1.04922	6.49651	21.1411	7.48478e-05	0.00264284	19	4	Down-regulated
Sus_scrofa___TMEM86A	-1.83015	3.36686	20.9642	7.69107e-05	0.00270879	19	4	Down-regulated
Sus_scrofa___ARHGEF6	-1.36408	6.02868	20.9344	7.98261e-05	0.00278735	19	4	Down-regulated
Sus_scrofa___CARD9	-2.47112	1.61622	18.5274	8.01302e-05	0.0027923	19	4	Down-regulated
Sus_scrofa___HBB	-2.08274	2.9397	20.4554	8.05005e-05	0.00280135	19	4	Down-regulated
Sus_scrofa___ENSSSCG00000046603	-1.73804	2.18644	19.5186	8.20945e-05	0.00284735	19	4	Down-regulated
Sus_scrofa___IARS2	-0.869127	6.35451	20.8219	8.24997e-05	0.00285806	19	4	Down-regulated
Sus_scrofa___IL12RB1	-2.73843	1.19102	18.2357	8.30676e-05	0.00287437	19	4	Down-regulated
Sus_scrofa___ENSSSCG00000039921	-3.1673	0.960074	18.7513	8.35443e-05	0.00288749	19	4	Down-regulated
Sus_scrofa___NPNT	-2.943	1.43766	18.2051	8.39049e-05	0.00289658	19	4	Down-regulated
Sus_scrofa___RAI2	-2.81792	1.57741	18.2716	8.41003e-05	0.00289994	19	4	Down-regulated
Sus_scrofa___SH3TC1	-1.82186	3.08713	20.452	8.58256e-05	0.00294913	19	4	Down-regulated
Papio_anubis_SESTD1	-2.21463	2.28424	19.275	8.70319e-05	0.00297772	19	4	Down-regulated
Sus_scrofa___SLC35E2B	-1.06712	4.32837	20.7031	8.71603e-05	0.00297772	19	4	Down-regulated
Sus_scrofa___SEL1L3	-1.64778	5.22637	20.5732	8.97377e-05	0.00304457	19	4	Down-regulated
Sus_scrofa___ENSSSCG00000035756	-1.96722	2.13592	19.02	9.10961e-05	0.00308373	19	4	Down-regulated
Sus_scrofa___CCDC82	-1.30797	5.74921	20.496	9.14115e-05	0.00309088	19	4	Down-regulated
Sus_scrofa___RND3	-1.66923	5.87796	20.4478	9.27629e-05	0.00313018	19	4	Down-regulated
Sus_scrofa___ENSSSCG00000016085	-1.46778	4.89738	20.4594	9.32991e-05	0.00313932	19	4	Down-regulated
Sus_scrofa___FES	-1.21569	4.88785	20.454	9.33742e-05	0.00313932	19	4	Down-regulated
Sus_scrofa___MS4A2	-3.52546	0.7951	19.4665	9.45301e-05	0.00317099	19	4	Down-regulated
Sus_scrofa___RB1CC1	-0.813899	7.59638	20.3605	9.49363e-05	0.00318071	19	4	Down-regulated
Sus_scrofa___ABI2	-0.88158	7.30908	20.3208	9.61186e-05	0.00320973	19	4	Down-regulated
Sus_scrofa___ENPP6	-1.90549	3.38849	20.2266	9.66173e-05	0.00322275	19	4	Down-regulated
Sus_scrofa___NDUFC2	-2.25597	3.08439	19.9019	9.71566e-05	0.00323167	19	4	Down-regulated
Sus_scrofa___CDK9	-1.0395	6.54417	20.2867	9.72121e-05	0.00323167	19	4	Down-regulated
Sus_scrofa___IKZF3	-2.09743	2.57413	19.4481	9.73989e-05	0.00323426	19	4	Down-regulated
Sus_scrofa___WDFY3	-0.582062	9.27101	20.2711	9.75762e-05	0.00323652	19	4	Down-regulated
Sus_scrofa___ENSSSCG00000021374	-2.60192	2.49549	19.0447	9.81801e-05	0.0032529	19	4	Down-regulated
Sus_scrofa___THNSL2	-1.28067	5.48912	20.2636	9.83653e-05	0.00325511	19	4	Down-regulated
Sus_scrofa___TSNARE1	-1.21917	4.85755	20.2795	9.85481e-05	0.00325511	19	4	Down-regulated
Sus_scrofa___ENSSSCG00000036224	-2.11295	3.20706	20.0207	9.86865e-05	0.00325511	19	4	Down-regulated
Sus_scrofa___SCP2	-0.920818	7.65128	20.1927	9.99877e-05	0.00329164	19	4	Down-regulated
Sus_scrofa___NDUFB2	-2.21561	3.82526	20.1869	0.000100431	0.00330023	19	4	Down-regulated
Sus_scrofa___ENSSSCG00000035189	-2.73539	1.15483	17.7403	0.0001005	0.00330023	19	4	Down-regulated
Sus_scrofa___ITGAM	-2.09931	3.29597	20.0121	0.00010159	0.00332496	19	4	Down-regulated
Sus_scrofa___DNAH10	-1.16619	5.17998	20.1592	0.000101864	0.00333026	19	4	Down-regulated
Sus_scrofa___RCAN2	-2.65647	6.98358	20.0966	0.000103146	0.00335367	19	4	Down-regulated
Sus_scrofa___ENSSSCG00000043546	-3.63864	0.83369	19.2159	0.000103787	0.00336359	19	4	Down-regulated
Sus_scrofa___GPS1	-1.15742	4.36519	20.1061	0.00010466	0.00338063	19	4	Down-regulated
Sus_scrofa___TBX21	-5.15822	0.656534	28.1595	0.000105322	0.003389	19	4	Down-regulated
Sus_scrofa___MTM1	-0.830287	5.26316	20.0463	0.00010533	0.003389	19	4	Down-regulated
Sus_scrofa___ITGA4	-1.59755	3.55921	20.0306	0.00010554	0.00339057	19	4	Down-regulated
Sus_scrofa___ZNF483	-1.34673	4.70834	20.0521	0.000106008	0.00340191	19	4	Down-regulated
Sus_scrofa___AIG1	-1.11877	5.66237	19.9704	0.000107562	0.0034406	19	4	Down-regulated
Sus_scrofa___ENSSSCG00000033997	-2.44305	1.31216	17.5175	0.000108294	0.00345282	19	4	Down-regulated
Sus_scrofa___CDKL5	-0.955304	6.69312	19.851	0.000111265	0.00352477	19	4	Down-regulated
Sus_scrofa___CYP4V2	-1.52225	3.9501	19.8771	0.000112312	0.00355034	19	4	Down-regulated
Sus_scrofa___FBP1	-2.08753	5.02551	19.856	0.000112554	0.00355422	19	4	Down-regulated
Sus_scrofa___ENSSSCG00000040083	-1.78349	2.76558	19.3112	0.000113078	0.0035644	19	4	Down-regulated
Sus_scrofa___ZER1	-0.897042	5.75859	19.8036	0.000113207	0.0035644	19	4	Down-regulated
Sus_scrofa___CCDC15	-0.897179	6.18387	19.7977	0.000113238	0.0035644	19	4	Down-regulated
Sus_scrofa___SLC47A2	-2.27466	1.73156	17.7165	0.000113477	0.00356815	19	4	Down-regulated
Sus_scrofa___COL11A1	-1.11326	5.86975	19.7299	0.000115805	0.00361829	19	4	Down-regulated
Sus_scrofa___MDM1	-1.34779	4.23868	19.7523	0.000116954	0.00364266	19	4	Down-regulated
Sus_scrofa___SLC46A3	-2.04461	6.56429	19.6881	0.000117178	0.00364581	19	4	Down-regulated
Sus_scrofa___ENSSSCG00000011121	-0.960046	10.472	19.6274	0.000119226	0.00369673	19	4	Down-regulated
Sus_scrofa___ADSS1	-3.06704	1.55748	17.3029	0.000120076	0.00371258	19	4	Down-regulated
Sus_scrofa___IL10RA	-2.37233	3.05645	19.2531	0.000121043	0.0037365	19	4	Down-regulated
Sus_scrofa___FOXN3	-0.740413	9.27419	19.5528	0.000122054	0.00375215	19	4	Down-regulated
Sus_scrofa___ZFP69B	-1.13883	5.14577	19.5688	0.000122474	0.00375652	19	4	Down-regulated
Sus_scrofa___NPR2	-1.01136	5.36092	19.5601	0.000122512	0.00375652	19	4	Down-regulated
Sus_scrofa___CCP110	-1.23215	5.14958	19.5454	0.000123363	0.00377481	19	4	Down-regulated
Sus_scrofa___SUSD1	-1.63972	2.99733	19.2876	0.000124342	0.00380082	19	4	Down-regulated
Sus_scrofa___ADAMTS19	-1.66426	7.3598	19.4725	0.000125218	0.00382366	19	4	Down-regulated
Sus_scrofa___SPATA6	-0.969227	6.16772	19.4604	0.000125874	0.0038359	19	4	Down-regulated
Sus_scrofa___ARHGEF11	-0.640856	8.26592	19.4448	0.000126274	0.00384007	19	4	Down-regulated
Sus_scrofa___RPA2	-1.5561	3.01057	19.2081	0.000128138	0.00388878	19	4	Down-regulated
Sus_scrofa___MME	-2.45768	6.97193	19.3749	0.00012923	0.00391789	19	4	Down-regulated
Sus_scrofa___BAIAP3	-2.52333	1.34439	17.0461	0.000130719	0.00395496	19	4	Down-regulated
Sus_scrofa___DYNC2I2	-1.14726	5.04728	19.3321	0.000132064	0.00399156	19	4	Down-regulated
Sus_scrofa___SOGA1	-0.79841	6.37331	19.2373	0.000134975	0.00407123	19	4	Down-regulated
Sus_scrofa___ENSSSCG00000007524	-1.66805	5.46774	19.2306	0.000135975	0.0040889	19	4	Down-regulated
Sus_scrofa___ENSSSCG00000033497	-0.800052	8.60804	19.1686	0.00013778	0.0041348	19	4	Down-regulated
Sus_scrofa___ASB4	-2.6591	2.23168	17.6526	0.000139669	0.00417344	19	4	Down-regulated
Sus_scrofa___SH3D19	-0.74852	9.54947	19.111	0.000140314	0.00418119	19	4	Down-regulated
Sus_scrofa___LRIG3	-1.35688	5.76966	19.0049	0.000145652	0.00431421	19	4	Down-regulated
Sus_scrofa___HLF	-1.91053	4.9279	19.0224	0.000146179	0.00432549	19	4	Down-regulated
Sus_scrofa___SCIMP	-2.67015	1.24153	16.7576	0.000146972	0.00434462	19	4	Down-regulated
Sus_scrofa___C1orf185	-1.41839	4.71334	18.9671	0.000148937	0.00438957	19	4	Down-regulated
Sus_scrofa___SEPTIN6	-1.32847	4.92601	18.9474	0.000149411	0.00439916	19	4	Down-regulated
Sus_scrofa___ADAM28	-2.07836	1.79133	17.1812	0.000149574	0.00439957	19	4	Down-regulated
Sus_scrofa___RIN2	-1.1539	8.5688	18.895	0.000150296	0.00441643	19	4	Down-regulated
Sus_scrofa___ARSB	-1.11784	5.47571	18.8588	0.0001528	0.00447227	19	4	Down-regulated
Sus_scrofa___MCOLN2	-2.18111	4.7409	18.8498	0.000154874	0.00452402	19	4	Down-regulated
Sus_scrofa___EBF3	-1.13823	8.50026	18.7693	0.000156455	0.00456123	19	4	Down-regulated
Sus_scrofa___PRRT1	-1.86442	3.07251	18.5381	0.000156783	0.00456359	19	4	Down-regulated
Sus_scrofa___THEMIS2	-1.88402	1.71661	17.003	0.000156845	0.00456359	19	4	Down-regulated
Sus_scrofa___CALCOCO1	-1.21477	5.27916	18.7777	0.000157077	0.00456586	19	4	Down-regulated
Sus_scrofa___POU2F2	-3.01428	0.867466	17.1578	0.000157544	0.00457496	19	4	Down-regulated
Sus_scrofa___NUDT22	-1.5827	2.85391	18.4132	0.000159349	0.0046183	19	4	Down-regulated
Sus_scrofa___ATP8A1	-2.31155	3.89421	18.7071	0.000159976	0.00462896	19	4	Down-regulated
Sus_scrofa___ZNF704	-1.32078	8.45334	18.6614	0.000161954	0.00467096	19	4	Down-regulated
Sus_scrofa___DCLK1	-0.907458	8.13235	18.658	0.000162134	0.0046716	19	4	Down-regulated
Sus_scrofa___IL7R	-2.54379	1.11109	16.519	0.000162951	0.00469059	19	4	Down-regulated
Sus_scrofa___ENSSSCG00000000025	-3.67403	0.764531	18.3299	0.000163774	0.00469989	19	4	Down-regulated
Sus_scrofa___ENSSSCG00000024500	-1.18946	4.09742	18.6833	0.000163909	0.00469989	19	4	Down-regulated
Sus_scrofa___NAGA	-1.02724	5.01769	18.6153	0.000165817	0.00474083	19	4	Down-regulated
Sus_scrofa___TAGLN3	-3.5734	0.855648	17.7837	0.000166411	0.00474714	19	4	Down-regulated
Sus_scrofa___ITGB7	-2.27335	1.55907	16.6192	0.000167179	0.00476139	19	4	Down-regulated
Sus_scrofa___ARMH4	-1.23699	3.86089	18.6063	0.000167798	0.00477107	19	4	Down-regulated
Sus_scrofa___XKR4	-1.92842	2.74619	18.0718	0.000167841	0.00477107	19	4	Down-regulated
Sus_scrofa___TIAM1	-1.31908	6.25007	18.4963	0.000171045	0.00485747	19	4	Down-regulated
Sus_scrofa___TMEM160	-2.02928	2.439	17.5801	0.000172011	0.00488023	19	4	Down-regulated
Sus_scrofa___ARID4A	-0.870978	7.23124	18.4611	0.000172762	0.00489684	19	4	Down-regulated
Sus_scrofa___CD37	-2.09377	1.59018	16.5694	0.000173444	0.00491148	19	4	Down-regulated
Sus_scrofa___PGAM2	-2.45935	1.97232	16.8123	0.000175063	0.00495259	19	4	Down-regulated
Sus_scrofa___AGTR1	-1.5034	5.89521	18.3869	0.00017742	0.00500971	19	4	Down-regulated
Sus_scrofa___SF3B1	-0.766529	9.16736	18.3735	0.000177653	0.00501151	19	4	Down-regulated
Sus_scrofa___BTBD11	-1.14647	3.49495	18.3791	0.000178477	0.00502995	19	4	Down-regulated
Sus_scrofa___FAM110B	-0.988666	6.69135	18.3354	0.000179985	0.00506115	19	4	Down-regulated
Sus_scrofa___SNX2	-0.787982	6.60535	18.3249	0.000180606	0.00506587	19	4	Down-regulated
Sus_scrofa___C1QA	-2.73039	1.38199	16.2623	0.000181283	0.00508005	19	4	Down-regulated
Sus_scrofa___WWC3	-0.565568	7.42619	18.1924	0.000188405	0.00523995	19	4	Down-regulated
Sus_scrofa___CYTIP	-3.28366	1.2872	16.1952	0.00019039	0.00529021	19	4	Down-regulated
Sus_scrofa___GZMH	-2.78135	1.08986	16.1743	0.000191133	0.00530587	19	4	Down-regulated
Sus_scrofa___STIM2	-0.785892	6.75032	18.1349	0.000192031	0.00532519	19	4	Down-regulated
Sus_scrofa___FADS2	-1.39031	5.63384	18.1431	0.000192189	0.00532519	19	4	Down-regulated
Sus_scrofa___BRF1	-0.873087	5.55173	18.1393	0.000192401	0.0053261	19	4	Down-regulated
Sus_scrofa___RBM5	-0.565423	8.55978	18.0825	0.000195205	0.00538664	19	4	Down-regulated
Sus_scrofa___ENSSSCG00000034019	-1.94832	4.53457	18.1052	0.000196927	0.00542097	19	4	Down-regulated
Sus_scrofa___TTC16	-2.39638	1.88234	16.3806	0.00019978	0.00548424	19	4	Down-regulated
Sus_scrofa___BANK1	-1.92254	4.59255	18.0458	0.000200634	0.00550257	19	4	Down-regulated
Sus_scrofa___RORA	-1.0055	11.6658	17.9432	0.000204253	0.00558631	19	4	Down-regulated
Sus_scrofa___NAGK	-0.78492	5.98165	17.9402	0.000204868	0.00559656	19	4	Down-regulated
Sus_scrofa___SCAI	-0.885159	6.45638	17.905	0.000207018	0.00562828	19	4	Down-regulated
Sus_scrofa___SAT1	-1.18377	9.06184	17.9005	0.000207118	0.00562828	19	4	Down-regulated
Sus_scrofa___AXL	-0.912975	6.30425	17.9007	0.000207364	0.00562982	19	4	Down-regulated
Sus_scrofa___ARHGAP10	-1.0248	10.1594	17.8886	0.00020792	0.00563974	19	4	Down-regulated
Sus_scrofa___KYNU	-1.82032	3.3138	17.809	0.000208794	0.00564543	19	4	Down-regulated
Sus_scrofa___ENSSSCG00000031608	-3.04695	2.38229	16.4165	0.000209291	0.00564543	19	4	Down-regulated
Sus_scrofa___ENSSSCG00000021757	-1.03135	4.74429	17.9027	0.00020939	0.00564543	19	4	Down-regulated
Sus_scrofa___TMEM156	-1.73753	2.46347	17.1789	0.000209464	0.00564543	19	4	Down-regulated
Sus_scrofa___DYNC2I1	-0.940753	5.16463	17.8816	0.000209832	0.00565019	19	4	Down-regulated
Sus_scrofa___ENSSSCG00000033643	-1.864	1.79931	16.2668	0.00021217	0.00570278	19	4	Down-regulated
Sus_scrofa___USP46	-0.770715	6.29168	17.8103	0.000213572	0.00572074	19	4	Down-regulated
Sus_scrofa___PPARD	-0.876703	5.66142	17.8138	0.00021377	0.00572074	19	4	Down-regulated
Sus_scrofa___HERC1	-0.739962	7.60366	17.7352	0.000218648	0.00582931	19	4	Down-regulated
Sus_scrofa___ZAP70	-3.95421	0.720177	18.8718	0.000221256	0.00587768	19	4	Down-regulated
Sus_scrofa___ENSSSCG00000023014	-2.69594	2.27016	16.3844	0.000221557	0.00588039	19	4	Down-regulated
Sus_scrofa___ENSSSCG00000031311	-2.64288	0.990256	15.8216	0.000223938	0.00592516	19	4	Down-regulated
Sus_scrofa___TLE4	-1.00876	6.66354	17.6612	0.000224149	0.00592516	19	4	Down-regulated
Sus_scrofa___SMIM35	-2.37635	1.33677	15.6914	0.00022504	0.00594088	19	4	Down-regulated
Papio_anubis_CKMT2	-4.08873	0.655216	19.9812	0.000226691	0.00597916	19	4	Down-regulated
Sus_scrofa___TSPAN4	-1.55473	3.41257	17.5829	0.000227723	0.00599569	19	4	Down-regulated
Sus_scrofa___ENSSSCG00000004415	-1.21992	4.72747	17.62	0.000229758	0.00603998	19	4	Down-regulated
Sus_scrofa___ENSSSCG00000010884	-1.40797	3.30371	17.5517	0.000229813	0.00603998	19	4	Down-regulated
Sus_scrofa___LMO1	-2.2222	1.51763	15.7206	0.000230798	0.00606051	19	4	Down-regulated
Sus_scrofa___GOLIM4	-0.89478	6.71779	17.5434	0.00023297	0.00611211	19	4	Down-regulated
Sus_scrofa___TMEM231	-1.15586	4.12244	17.5582	0.000235776	0.00617478	19	4	Down-regulated
Sus_scrofa___PTPN22	-1.77057	2.06463	16.377	0.000236083	0.00617735	19	4	Down-regulated
Sus_scrofa___CORO2B	-1.27488	7.80852	17.4821	0.0002376	0.00620062	19	4	Down-regulated
Sus_scrofa___SYK	-2.07471	2.8628	17.0816	0.000242966	0.00630732	19	4	Down-regulated
Sus_scrofa___HMCN2	-2.7737	8.65547	17.3859	0.000245251	0.00634406	19	4	Down-regulated
Sus_scrofa___ENSSSCG00000031916	-2.95743	0.885057	15.8811	0.000245452	0.00634406	19	4	Down-regulated
Sus_scrofa___ENSSSCG00000039825	-3.03604	1.40938	15.506	0.000245801	0.00634754	19	4	Down-regulated
Sus_scrofa___ENSSSCG00000007920	-1.11039	4.35212	17.4029	0.000247719	0.00638594	19	4	Down-regulated
Sus_scrofa___TCAP	-3.08402	4.58731	17.3763	0.000248298	0.00639528	19	4	Down-regulated
Sus_scrofa___TCF4	-0.828818	11.0401	17.3422	0.000248786	0.0064023	19	4	Down-regulated
Sus_scrofa___ST3GAL5	-1.71139	5.99415	17.3326	0.00025025	0.0064288	19	4	Down-regulated
Sus_scrofa___RGS6	-2.51277	5.72521	17.335	0.000251036	0.00644178	19	4	Down-regulated
Sus_scrofa___SEMA4C	-1.19823	3.93116	17.3636	0.00025119	0.00644178	19	4	Down-regulated
Sus_scrofa___MLH1	-0.962914	4.7637	17.338	0.000251827	0.00645252	19	4	Down-regulated
Sus_scrofa___ASB18	-3.3	1.33751	15.4269	0.000260106	0.00663025	19	4	Down-regulated
Sus_scrofa___NME4	-2.48181	1.13082	15.3343	0.000261189	0.0066407	19	4	Down-regulated
Sus_scrofa___CCL26	-2.80174	2.54655	16.1714	0.000262114	0.00665528	19	4	Down-regulated
Sus_scrofa___RFC3	-0.878471	5.8899	17.1773	0.000263351	0.00666706	19	4	Down-regulated
Sus_scrofa___ASB15	-3.51558	1.80291	15.3248	0.000266638	0.00672727	19	4	Down-regulated
Sus_scrofa___PTPRG	-0.724699	8.41315	17.0882	0.000270659	0.00681131	19	4	Down-regulated
Sus_scrofa___SLC16A12	-1.83012	5.65707	17.0877	0.00027191	0.00682645	19	4	Down-regulated
Sus_scrofa___XRCC1	-1.03714	4.55282	16.9689	0.000285291	0.00708326	19	4	Down-regulated
Sus_scrofa___TMEM106A	-1.81299	2.75306	16.5414	0.000285894	0.00709227	19	4	Down-regulated
Sus_scrofa___ARL6IP4	-0.95783	4.62806	16.9418	0.000287597	0.00712837	19	4	Down-regulated
Sus_scrofa___CALCRL	-1.10998	7.67065	16.8808	0.000290073	0.00717792	19	4	Down-regulated
Sus_scrofa___DUSP26	-2.99457	1.16845	15.1122	0.000296856	0.00731603	19	4	Down-regulated
Sus_scrofa___UNC13C	-2.77831	5.2897	16.8367	0.000297571	0.00732672	19	4	Down-regulated
Sus_scrofa___EPB41L3	-2.20764	5.11798	16.8247	0.000298643	0.00734701	19	4	Down-regulated
Sus_scrofa___SUGP2	-0.744438	5.67453	16.7591	0.000302969	0.00742261	19	4	Down-regulated
Sus_scrofa___ENSSSCG00000000359	-1.56393	2.96271	16.5607	0.000303651	0.00743317	19	4	Down-regulated
Sus_scrofa___DOCK6	-1.13949	5.34896	16.746	0.000304981	0.00745813	19	4	Down-regulated
Sus_scrofa___GLUL	-2.25308	5.79855	16.7135	0.000308134	0.00751189	19	4	Down-regulated
Sus_scrofa___ENSSSCG00000050831	-2.25237	1.45446	14.9853	0.000310237	0.00754451	19	4	Down-regulated
Sus_scrofa___DOCK11	-1.0885	5.7391	16.683	0.000310795	0.00755189	19	4	Down-regulated
Sus_scrofa___TSC1	-0.889952	6.02266	16.669	0.000311913	0.00756664	19	4	Down-regulated
Sus_scrofa___SRCIN1	-2.05446	2.03401	15.5009	0.000312322	0.00757036	19	4	Down-regulated
Sus_scrofa___ABLIM3	-1.25548	6.77178	16.656	0.000312926	0.0075788	19	4	Down-regulated
Sus_scrofa___ZSWIM7	-0.762516	5.51551	16.6615	0.000313298	0.00758161	19	4	Down-regulated
Sus_scrofa___WBP2	-0.935664	5.85185	16.6427	0.000314851	0.00760056	19	4	Down-regulated
Sus_scrofa___MRGPRF	-1.93361	2.28369	15.7854	0.000317373	0.00764378	19	4	Down-regulated
Sus_scrofa___GLCCI1	-1.18934	6.15498	16.6164	0.000317416	0.00764378	19	4	Down-regulated
Sus_scrofa___BTG4	-1.89337	2.47092	15.9326	0.000318899	0.00767327	19	4	Down-regulated
Sus_scrofa___CEP68	-0.98488	5.40524	16.5832	0.000321911	0.00772064	19	4	Down-regulated
Sus_scrofa___USP12	-0.650655	6.68009	16.5218	0.000327375	0.00782634	19	4	Down-regulated
Sus_scrofa___ENSSSCG00000007978	-2.46199	2.01384	15.1229	0.000339416	0.0080625	19	4	Down-regulated
Sus_scrofa___DUSP28	-0.923744	5.13929	16.3884	0.000344413	0.00816775	19	4	Down-regulated
Sus_scrofa___CCDC88A	-0.745244	7.45457	16.3431	0.000347601	0.0082236	19	4	Down-regulated
Sus_scrofa___PHLDB2	-1.21947	7.673	16.3383	0.000348154	0.0082301	19	4	Down-regulated
Sus_scrofa___SV2C	-1.83184	3.31402	16.2526	0.00035145	0.00828818	19	4	Down-regulated
Sus_scrofa___CD3D	-4.50849	0.522974	21.0362	0.000353672	0.00833136	19	4	Down-regulated
Sus_scrofa___SLC24A4	-1.48369	4.1219	16.3279	0.000354735	0.00833908	19	4	Down-regulated
Sus_scrofa___FNDC3B	-0.70711	11.0921	16.2552	0.000358054	0.00840377	19	4	Down-regulated
Sus_scrofa___MAP4K1	-2.90773	0.848883	14.9813	0.000361043	0.00846051	19	4	Down-regulated
Sus_scrofa___ADAM19	-1.66283	7.59739	16.2267	0.000361613	0.00846717	19	4	Down-regulated
Sus_scrofa___ATP5IF1	-2.52465	4.05183	16.2198	0.000362854	0.00848283	19	4	Down-regulated
Sus_scrofa___NARF	-0.939616	6.61091	16.197	0.000365452	0.00851668	19	4	Down-regulated
Sus_scrofa___RGS14	-2.92517	0.719458	15.2695	0.000365997	0.00852267	19	4	Down-regulated
Sus_scrofa___PKD2	-0.687592	7.73914	16.1786	0.000367534	0.00854503	19	4	Down-regulated
Sus_scrofa___DAZAP1	-0.910139	7.18582	16.1706	0.000368602	0.00855642	19	4	Down-regulated
Sus_scrofa___SLU7	-0.796795	5.42845	16.1307	0.000375026	0.00868512	19	4	Down-regulated
Sus_scrofa___ND4L	-2.28869	2.14105	15.0753	0.00037608	0.0086991	19	4	Down-regulated
Sus_scrofa___CD8A	-2.73925	0.925298	14.6868	0.000376217	0.0086991	19	4	Down-regulated
Sus_scrofa___CCDC170	-0.908848	7.09045	16.1008	0.000377477	0.00870783	19	4	Down-regulated
Sus_scrofa___P2RY8	-2.0215	1.65247	14.6151	0.000378582	0.00871975	19	4	Down-regulated
[truncated: 627 more rows]

## Sheet: Mural cells
Gene	logFC	logCPM	F	PValue	FDR	Observations_Transplanted	Observations_Control	level
Sus_scrofa___hCD46	9.28657	8.07816	150.196	2.30066e-14	1.31603e-10	19	4	Up-regulated
Sus_scrofa___PFKFB3	2.38579	7.22029	42.4185	1.04707e-07	4.108e-05	19	4	Up-regulated
Sus_scrofa___ACKR2	4.01165	7.0992	39.7881	1.73299e-07	6.00796e-05	19	4	Up-regulated
Sus_scrofa___PLOD2	2.75758	9.04847	38.657	2.64742e-07	7.97049e-05	19	4	Up-regulated
Sus_scrofa___NAB1	1.77232	6.84269	35.8329	5.63287e-07	0.000146461	19	4	Up-regulated
Sus_scrofa___ZNF662	3.08552	7.14718	34.632	7.55967e-07	0.000188014	19	4	Up-regulated
Sus_scrofa___OSMR	2.21678	7.56162	34.3042	8.42431e-07	0.000207265	19	4	Up-regulated
Sus_scrofa___CBLB	1.95023	9.52012	32.9329	1.21583e-06	0.000267494	19	4	Up-regulated
Sus_scrofa___ENO1	3.33997	7.0011	32.1398	1.46762e-06	0.000304327	19	4	Up-regulated
Sus_scrofa___SLC7A2	3.2026	7.20082	31.1557	1.98317e-06	0.000377605	19	4	Up-regulated
Sus_scrofa___IGFBP2	3.62684	7.22717	30.7593	2.1633e-06	0.000403503	19	4	Up-regulated
Sus_scrofa___HK2	5.4356	5.95455	28.5765	4.05465e-06	0.000659133	19	4	Up-regulated
Sus_scrofa___ENSSSCG00000016868	3.25645	7.50415	28.3311	4.56034e-06	0.000724619	19	4	Up-regulated
Sus_scrofa___TAF4B	2.89538	5.91834	26.8044	6.61173e-06	0.000945519	19	4	Up-regulated
Sus_scrofa___PRRG1	2.74177	6.14812	26.7982	6.9461e-06	0.000981072	19	4	Up-regulated
Sus_scrofa___LRRC58	2.99852	5.02217	25.727	7.54368e-06	0.0010398	19	4	Up-regulated
Sus_scrofa___BNIP3	2.87103	7.12397	26.0114	9.24754e-06	0.00120223	19	4	Up-regulated
Sus_scrofa___ELL2	3.0635	7.17803	25.9074	9.50992e-06	0.00122936	19	4	Up-regulated
Sus_scrofa___CALU	1.49564	7.40925	25.7595	1.00655e-05	0.00128664	19	4	Up-regulated
Sus_scrofa___RYK	1.31722	7.50898	25.4434	1.10928e-05	0.0013911	19	4	Up-regulated
Sus_scrofa___SOCS5	1.6718	8.72328	25.37	1.12967e-05	0.00139939	19	4	Up-regulated
Sus_scrofa___SPATA5	1.96457	8.30881	24.5716	1.45482e-05	0.00165611	19	4	Up-regulated
Sus_scrofa___PCMT1	1.78296	6.57611	24.5618	1.47561e-05	0.00167145	19	4	Up-regulated
Sus_scrofa___LUZP1	1.28299	8.11963	23.6492	1.95308e-05	0.00207853	19	4	Up-regulated
Sus_scrofa___PSMD14	1.78191	6.61851	23.3347	2.18472e-05	0.00227488	19	4	Up-regulated
Sus_scrofa___AGFG1	1.52467	7.20633	23.2849	2.21041e-05	0.0022849	19	4	Up-regulated
Sus_scrofa___CTPS1	4.07193	5.41224	22.5554	2.28904e-05	0.00234546	19	4	Up-regulated
Sus_scrofa___PAPPA	3.11036	8.30344	23.0988	2.33982e-05	0.00237944	19	4	Up-regulated
Sus_scrofa___PDGFA	2.93548	5.94953	22.4388	2.6924e-05	0.0026638	19	4	Up-regulated
Sus_scrofa___HIF1A	2.02367	7.59605	22.3926	2.95196e-05	0.00281432	19	4	Up-regulated
Sus_scrofa___PRMT2	1.65348	9.29595	22.224	3.10459e-05	0.00293538	19	4	Up-regulated
Sus_scrofa___MRPS27	1.69553	6.99097	21.2834	4.28474e-05	0.0037136	19	4	Up-regulated
Sus_scrofa___RAB5A	1.42528	6.57574	20.9832	4.7575e-05	0.00400207	19	4	Up-regulated
Sus_scrofa___THBS1	3.04837	8.20237	20.5681	5.4314e-05	0.00435526	19	4	Up-regulated
Sus_scrofa___NUFIP2	1.22767	7.65578	20.2459	6.06015e-05	0.004755	19	4	Up-regulated
Sus_scrofa___LRPPRC	1.82952	6.5772	20.2537	6.08422e-05	0.004755	19	4	Up-regulated
Sus_scrofa___VMP1	1.67785	8.03712	20.1443	6.2686e-05	0.00482935	19	4	Up-regulated
Sus_scrofa___OLA1	1.93892	6.95442	19.9604	6.71695e-05	0.005106	19	4	Up-regulated
Sus_scrofa___EIF4E	2.20034	5.95018	19.8292	6.89688e-05	0.00517402	19	4	Up-regulated
Sus_scrofa___NFIL3	3.20433	4.78671	19.224	7.00149e-05	0.00519756	19	4	Up-regulated
Sus_scrofa___ENSSSCG00000016226	2.02278	5.80652	19.5709	7.54051e-05	0.00549473	19	4	Up-regulated
Sus_scrofa___STK39	1.97172	9.96474	19.4335	7.99779e-05	0.00568315	19	4	Up-regulated
Sus_scrofa___ATP8A2	2.52155	6.12541	19.2853	8.28054e-05	0.00582976	19	4	Up-regulated
Sus_scrofa___SERPINH1	1.7934	5.90902	19.258	8.51592e-05	0.00594063	19	4	Up-regulated
Sus_scrofa___IPO5	1.80487	6.39892	18.8869	9.77107e-05	0.00659504	19	4	Up-regulated
Sus_scrofa___DNAJB9	4.8775	4.32928	18.6189	9.87139e-05	0.00664315	19	4	Up-regulated
Sus_scrofa___SEC13	1.59004	6.35259	18.7586	0.000102395	0.00681077	19	4	Up-regulated
Sus_scrofa___GNL3	2.13065	5.67341	18.5483	0.000106487	0.00694167	19	4	Up-regulated
Sus_scrofa___ATP13A3	2.12048	6.67998	18.5856	0.000108411	0.00702707	19	4	Up-regulated
Sus_scrofa___YAP1	1.61173	8.11983	18.5451	0.000109444	0.00703505	19	4	Up-regulated
Sus_scrofa___ADAMTS9	1.69702	9.91598	18.4446	0.000113227	0.00719652	19	4	Up-regulated
Sus_scrofa___STT3B	1.29474	7.22206	18.4322	0.000114326	0.00722621	19	4	Up-regulated
Sus_scrofa___KDM4C	1.25377	7.57677	18.2284	0.000122662	0.00762672	19	4	Up-regulated
Sus_scrofa___MRPS30	2.62082	5.55846	17.9783	0.000125083	0.00769363	19	4	Up-regulated
Sus_scrofa___TTC27	1.85138	6.47264	18.0826	0.000129868	0.00786082	19	4	Up-regulated
Sus_scrofa___HK1	1.45104	7.69287	18.053	0.00013055	0.00786082	19	4	Up-regulated
Sus_scrofa___TPM4	1.322	7.81933	18.0323	0.000131441	0.00789371	19	4	Up-regulated
Sus_scrofa___MYO1D	1.35377	9.69727	17.9807	0.000133597	0.0079605	19	4	Up-regulated
Sus_scrofa___ENSSSCG00000013715	2.13051	5.57424	17.7341	0.000141539	0.00828276	19	4	Up-regulated
Sus_scrofa___TTC39B	1.79158	6.92171	17.8221	0.000142443	0.00831345	19	4	Up-regulated
Sus_scrofa___PDE4A	1.99294	6.66517	17.8087	0.00014312	0.00831345	19	4	Up-regulated
Sus_scrofa___ENSSSCG00000033987	1.35538	7.6894	17.7956	0.000143154	0.00831345	19	4	Up-regulated
Sus_scrofa___PDLIM7	1.85278	7.54069	17.603	0.000153632	0.00878816	19	4	Up-regulated
Sus_scrofa___SLC16A3	5.12335	4.48559	17.4019	0.000162476	0.00917372	19	4	Up-regulated
Sus_scrofa___ERC1	1.52071	8.61698	17.4339	0.000162778	0.00917372	19	4	Up-regulated
Sus_scrofa___SLC25A15	2.78197	5.14813	16.8698	0.000175453	0.00972046	19	4	Up-regulated
Sus_scrofa___GPC5	5.18156	8.04095	17.0141	0.000179186	0.00982791	19	4	Up-regulated
Sus_scrofa___KPNA3	1.65194	6.21717	17.1557	0.000181505	0.00991175	19	4	Up-regulated
Sus_scrofa___HECTD2	1.64991	6.62042	16.9379	0.000196498	0.0104317	19	4	Up-regulated
Sus_scrofa___MDM2	1.48611	7.69478	16.8806	0.000199523	0.0105434	19	4	Up-regulated
Sus_scrofa___RTN2	1.84029	5.75509	16.766	0.000206491	0.0107136	19	4	Up-regulated
Sus_scrofa___SNAPC1	1.87035	6.72639	16.7677	0.000208902	0.0107898	19	4	Up-regulated
Sus_scrofa___TRAF3IP2	1.50088	7.20536	16.5541	0.00022547	0.0113634	19	4	Up-regulated
Sus_scrofa___FSTL5	3.24562	6.52578	16.4565	0.000226172	0.0113737	19	4	Up-regulated
Sus_scrofa___PLAC9	3.4217	5.31617	16.1391	0.000228855	0.0114583	19	4	Up-regulated
Sus_scrofa___SMARCD3	1.90173	6.62709	16.4902	0.000231336	0.011532	19	4	Up-regulated
Sus_scrofa___HSPA5	2.86629	5.58507	16.2353	0.000234816	0.0116547	19	4	Up-regulated
Sus_scrofa___DAPK3	3.05228	5.53591	16.1409	0.000238521	0.0117875	19	4	Up-regulated
Sus_scrofa___MAPK6	1.68127	5.71629	16.2596	0.00024955	0.0122269	19	4	Up-regulated
Sus_scrofa___SINHCAF	1.77402	6.14201	16.1654	0.000260623	0.0125544	19	4	Up-regulated
Sus_scrofa___VCL	1.78391	9.22471	16.029	0.000272684	0.0129715	19	4	Up-regulated
Sus_scrofa___BIRC3	1.26618	7.72677	16.0269	0.000273412	0.0129791	19	4	Up-regulated
Sus_scrofa___COL12A1	2.89564	7.62463	15.8144	0.000296207	0.0138035	19	4	Up-regulated
Sus_scrofa___PNPT1	1.77813	6.20552	15.7676	0.000302419	0.0140183	19	4	Up-regulated
Sus_scrofa___C7	2.35232	8.47454	15.7228	0.000306135	0.0140939	19	4	Up-regulated
Sus_scrofa___ADAMTS3	3.45602	6.24043	15.5061	0.000313982	0.0143312	19	4	Up-regulated
Sus_scrofa___EXOC5	1.42699	6.90952	15.6589	0.000315047	0.0143312	19	4	Up-regulated
Sus_scrofa___NIFK	1.77442	5.40979	15.524	0.00032211	0.0145369	19	4	Up-regulated
Sus_scrofa___BAG3	3.29867	4.83156	15.1339	0.000332728	0.0148985	19	4	Up-regulated
Sus_scrofa___TMEM165	2.09784	5.56156	15.3914	0.000338224	0.0150856	19	4	Up-regulated
Sus_scrofa___FBXO24	4.24861	3.97802	14.8074	0.000356747	0.0157278	19	4	Up-regulated
Sus_scrofa___NLK	1.62334	6.89654	15.2742	0.000364241	0.0159966	19	4	Up-regulated
Sus_scrofa___LARS1	1.10629	7.28118	15.1807	0.000376469	0.0162748	19	4	Up-regulated
Sus_scrofa___SPOP	1.4104	6.52784	15.1445	0.000383339	0.0163642	19	4	Up-regulated
Sus_scrofa___URGCP	1.60132	5.70165	15.0434	0.000394823	0.0166678	19	4	Up-regulated
Sus_scrofa___NAA25	1.36008	6.50419	14.9403	0.000414363	0.0172383	19	4	Up-regulated
Sus_scrofa___TEAD3	1.92817	6.52222	14.8126	0.000434138	0.0177068	19	4	Up-regulated
Sus_scrofa___PRKD1	1.37686	7.37836	14.7546	0.000442791	0.0179319	19	4	Up-regulated
Sus_scrofa___RAI14	3.09742	8.01011	14.7328	0.000446157	0.0180044	19	4	Up-regulated
Sus_scrofa___ENSSSCG00000035477	4.53183	4.10275	14.3742	0.000452925	0.0182072	19	4	Up-regulated
Sus_scrofa___UPP1	4.95951	4.39697	14.5296	0.000463638	0.0184708	19	4	Up-regulated
Sus_scrofa___SGMS2	2.57375	4.94032	14.3175	0.000465133	0.0184769	19	4	Up-regulated
Sus_scrofa___URI1	1.18663	7.49028	14.5678	0.000475413	0.0187125	19	4	Up-regulated
Sus_scrofa___SSR2	1.4925	5.84177	14.5549	0.000478494	0.0187473	19	4	Up-regulated
Sus_scrofa___PLSCR4	1.42934	9.06407	14.5186	0.000483377	0.0189062	19	4	Up-regulated
Sus_scrofa___CMSS1	1.17484	8.33984	14.3836	0.00050946	0.0193637	19	4	Up-regulated
Sus_scrofa___RBBP9	4.08979	3.90617	13.7882	0.000522518	0.0197759	19	4	Up-regulated
Sus_scrofa___REEP3	1.11465	8.04481	14.1714	0.000553323	0.0205863	19	4	Up-regulated
Sus_scrofa___CCDC47	1.76494	4.93275	13.9337	0.000564405	0.0209225	19	4	Up-regulated
Sus_scrofa___SYTL4	1.56718	6.70447	14.1015	0.000571503	0.0210912	19	4	Up-regulated
Sus_scrofa___RPL31	1.44703	7.74695	14.0299	0.000585095	0.0213859	19	4	Up-regulated
Sus_scrofa___BTG3	1.5779	6.64612	13.9784	0.000599671	0.0216763	19	4	Up-regulated
Sus_scrofa___CPM	1.61921	11.5203	13.9108	0.000611794	0.0220448	19	4	Up-regulated
Sus_scrofa___RGS2	3.19475	6.01937	13.7858	0.00061455	0.0220746	19	4	Up-regulated
Sus_scrofa___FARSA	2.76318	4.49967	13.4847	0.000618408	0.0221784	19	4	Up-regulated
Sus_scrofa___USO1	1.26236	6.96811	13.8079	0.000639907	0.022842	19	4	Up-regulated
Sus_scrofa___PAPSS1	1.29201	7.02113	13.7958	0.000642777	0.0229087	19	4	Up-regulated
Sus_scrofa___CANX	1.25348	6.46364	13.7964	0.000644476	0.0229335	19	4	Up-regulated
Sus_scrofa___ENSSSCG00000038187	1.71786	5.43954	13.7298	0.000646848	0.0229628	19	4	Up-regulated
Sus_scrofa___GART	1.72926	5.35722	13.6678	0.000659559	0.0232935	19	4	Up-regulated
Sus_scrofa___CCN1	3.11	5.75194	13.5575	0.000664191	0.0233805	19	4	Up-regulated
Sus_scrofa___PDLIM1	1.85938	7.16034	13.6814	0.000672027	0.0235477	19	4	Up-regulated
Sus_scrofa___ENSSSCG00000038594	3.13922	5.58597	13.4812	0.000674605	0.0236019	19	4	Up-regulated
Sus_scrofa___TMEM39A	1.30374	6.28014	13.6518	0.000682342	0.0238003	19	4	Up-regulated
Sus_scrofa___GADD45B	2.30641	5.42021	13.5359	0.000682355	0.0238003	19	4	Up-regulated
Sus_scrofa___UCK2	2.66637	5.89112	13.5107	0.000698736	0.0242164	19	4	Up-regulated
Sus_scrofa___UBAP2	1.10669	8.02584	13.5716	0.000699578	0.0242164	19	4	Up-regulated
Sus_scrofa___ANO4	3.24077	6.92242	13.3889	0.000744679	0.0251674	19	4	Up-regulated
Sus_scrofa___MAFF	2.20645	5.38657	13.2919	0.000752916	0.0253145	19	4	Up-regulated
Sus_scrofa___MB21D2	1.4006	6.19782	13.3982	0.000753698	0.0253145	19	4	Up-regulated
Sus_scrofa___MAK16	1.72806	4.75308	13.145	0.000754534	0.0253145	19	4	Up-regulated
Sus_scrofa___WDR17	1.68994	6.14628	13.3376	0.000770344	0.0257285	19	4	Up-regulated
Sus_scrofa___NOL11	1.52618	9.97188	13.3153	0.00077332	0.0257285	19	4	Up-regulated
Sus_scrofa___C5orf24	1.49106	5.8765	13.3213	0.000774663	0.0257285	19	4	Up-regulated
Sus_scrofa___SNX3	1.71609	5.62629	13.274	0.000781413	0.0258374	19	4	Up-regulated
Sus_scrofa___SYCP2	1.90118	7.16666	13.2856	0.000785458	0.0259243	19	4	Up-regulated
Sus_scrofa___PITRM1	1.58143	5.7445	13.2521	0.000793552	0.0261256	19	4	Up-regulated
Sus_scrofa___MTX2	1.60867	5.98081	13.2544	0.000795559	0.026154	19	4	Up-regulated
Sus_scrofa___YIPF2	1.47337	6.46086	13.2395	0.000802092	0.0262282	19	4	Up-regulated
Sus_scrofa___LMNA	1.23829	6.53351	13.2386	0.000802433	0.0262282	19	4	Up-regulated
Sus_scrofa___SLC10A7	1.49201	7.36893	13.151	0.00082773	0.0269024	19	4	Up-regulated
Sus_scrofa___NUDT21	1.63337	5.80351	13.1377	0.000830553	0.0269558	19	4	Up-regulated
Sus_scrofa___ADAMTS4	2.02926	6.22328	13.1095	0.000841019	0.0271415	19	4	Up-regulated
Sus_scrofa___CSF1	1.97086	6.00966	13.0223	0.000868686	0.027845	19	4	Up-regulated
Sus_scrofa___ADK	2.07087	6.836	12.9759	0.000888724	0.0283945	19	4	Up-regulated
Sus_scrofa___ARMC12	3.90771	3.80806	12.4343	0.000895767	0.0284538	19	4	Up-regulated
Sus_scrofa___GPHN	0.954621	9.56314	12.8897	0.000916126	0.0289929	19	4	Up-regulated
Sus_scrofa___PLAA	1.3781	6.30052	12.8944	0.000920577	0.0290116	19	4	Up-regulated
Sus_scrofa___POLR1F	1.27335	6.23944	12.8951	0.000920636	0.0290116	19	4	Up-regulated
Sus_scrofa___ZMAT3	4.06902	4.89764	12.7503	0.000929001	0.0291009	19	4	Up-regulated
Sus_scrofa___PUS7	1.09922	7.14119	12.8471	0.00093492	0.029184	19	4	Up-regulated
Sus_scrofa___CMPK2	4.78358	6.0648	12.62	0.000942403	0.0293776	19	4	Up-regulated
Sus_scrofa___BHLHE40	2.82187	5.1132	12.5993	0.000943891	0.0293839	19	4	Up-regulated
Sus_scrofa___TAMM41	2.69894	4.4617	12.4177	0.000957133	0.0297153	19	4	Up-regulated
Sus_scrofa___ENSSSCG00000011559	1.64543	5.74641	12.7683	0.000961316	0.0298047	19	4	Up-regulated
Sus_scrofa___ZCCHC7	0.925463	8.57203	12.7358	0.000974682	0.0300965	19	4	Up-regulated
Sus_scrofa___PLCXD3	2.89095	5.41312	12.5689	0.00097697	0.0300965	19	4	Up-regulated
Sus_scrofa___GSPT1	1.20336	6.39884	12.7396	0.000979438	0.0301217	19	4	Up-regulated
Sus_scrofa___RUNX1	2.35783	8.04943	12.6768	0.00099941	0.0305715	19	4	Up-regulated
Sus_scrofa___PINX1	1.401	6.12581	12.6842	0.00100117	0.0305844	19	4	Up-regulated
Sus_scrofa___GBE1	1.59973	7.67582	12.6562	0.00100787	0.030675	19	4	Up-regulated
Sus_scrofa___GLRB	2.54695	6.91242	12.6518	0.0010095	0.030675	19	4	Up-regulated
Sus_scrofa___PTPN11	1.18121	7.07044	12.6141	0.00102686	0.0309968	19	4	Up-regulated
Sus_scrofa___FAM13A	1.29459	9.09005	12.5993	0.00102948	0.0310351	19	4	Up-regulated
Sus_scrofa___SLC39A14	1.17367	8.93722	12.5743	0.00103995	0.0313092	19	4	Up-regulated
Sus_scrofa___NEDD9	1.57116	7.21116	12.5657	0.00104678	0.0314577	19	4	Up-regulated
Sus_scrofa___ENSSSCG00000029160	4.94423	5.51664	12.5167	0.00104763	0.0314577	19	4	Up-regulated
Sus_scrofa___NOP58	1.20495	6.92413	12.5371	0.00105991	0.0317433	19	4	Up-regulated
Sus_scrofa___STAMBPL1	2.33249	7.16562	12.5214	0.00106548	0.0318265	19	4	Up-regulated
Sus_scrofa___ZNF697	1.48081	6.44913	12.5206	0.00106891	0.031847	19	4	Up-regulated
Sus_scrofa___ADAM32	2.27284	4.93738	12.2409	0.00110158	0.0324442	19	4	Up-regulated
Sus_scrofa___BACH1	1.24568	6.72371	12.4336	0.00110616	0.0324937	19	4	Up-regulated
Sus_scrofa___TOPAZ1	1.79843	6.26633	12.4229	0.0011102	0.0324937	19	4	Up-regulated
Sus_scrofa___ZNF197	4.22192	3.96283	12.0525	0.00111195	0.0324937	19	4	Up-regulated
Sus_scrofa___IFRD2	1.99291	5.21107	12.2784	0.00113106	0.0328336	19	4	Up-regulated
Sus_scrofa___CCL2	2.50234	5.62044	12.2918	0.00113219	0.0328336	19	4	Up-regulated
Sus_scrofa___HSP90B1	1.51233	6.28953	12.3621	0.00113961	0.0329191	19	4	Up-regulated
Sus_scrofa___DDX60	4.54578	6.64693	12.1612	0.00114397	0.0329191	19	4	Up-regulated
Sus_scrofa___PSMD1	1.27029	7.04997	12.3456	0.00114453	0.0329191	19	4	Up-regulated
Sus_scrofa___LRRFIP1	1.43613	8.97686	12.3348	0.00114572	0.0329191	19	4	Up-regulated
Sus_scrofa___WDR70	1.01249	7.59027	12.327	0.00115095	0.0329645	19	4	Up-regulated
Sus_scrofa___ENSSSCG00000023850	2.19001	5.20698	12.2132	0.00115111	0.0329645	19	4	Up-regulated
Sus_scrofa___EMP1	1.99887	6.67387	12.3235	0.00115544	0.033047	19	4	Up-regulated
Sus_scrofa___GNAI1	1.24161	7.26733	12.3056	0.00116225	0.033125	19	4	Up-regulated
Sus_scrofa___AKIRIN1	1.61679	5.72494	12.2964	0.00116251	0.033125	19	4	Up-regulated
Sus_scrofa___ZMPSTE24	1.4621	5.30487	12.2124	0.00118725	0.0335766	19	4	Up-regulated
Sus_scrofa___SMARCA4	1.2073	6.92948	12.2159	0.00120692	0.0340093	19	4	Up-regulated
Sus_scrofa___RCBTB1	1.4465	5.93563	12.1839	0.00122356	0.0343933	19	4	Up-regulated
Sus_scrofa___TP53BP2	1.19031	7.51238	12.1676	0.00122827	0.0344411	19	4	Up-regulated
Sus_scrofa___ENSSSCG00000012006	1.86649	5.94299	12.062	0.00128017	0.0355479	19	4	Up-regulated
Sus_scrofa___CYP8B1	4.55483	4.14766	11.8294	0.00129161	0.0357789	19	4	Up-regulated
Sus_scrofa___EIF3H	1.12097	6.87644	12.0206	0.00130704	0.0361626	19	4	Up-regulated
Sus_scrofa___TEAD4	1.42864	6.37152	12.0211	0.00130913	0.0361766	19	4	Up-regulated
Sus_scrofa___CSNK1G1	0.902865	7.85623	11.9751	0.00132746	0.0364441	19	4	Up-regulated
Sus_scrofa___ASCC3	0.913997	7.9119	11.9655	0.00133257	0.0365157	19	4	Up-regulated
Sus_scrofa___ENSSSCG00000013696	1.81388	4.94238	11.7759	0.00136145	0.037076	19	4	Up-regulated
Sus_scrofa___EFL1	1.22356	6.34641	11.9237	0.00136274	0.037076	19	4	Up-regulated
Sus_scrofa___PPP4R2	1.02267	6.79765	11.9151	0.00136507	0.0370952	19	4	Up-regulated
Sus_scrofa___FAM168B	1.1602	6.58681	11.9128	0.0013677	0.0371227	19	4	Up-regulated
Sus_scrofa___EYA2	3.23261	5.89271	11.773	0.00137866	0.0373756	19	4	Up-regulated
Sus_scrofa___CHSY1	1.52762	8.05286	11.8728	0.00138417	0.0374807	19	4	Up-regulated
Sus_scrofa___WDR59	1.07062	6.88768	11.8722	0.0013887	0.0375145	19	4	Up-regulated
Sus_scrofa___RNF135	1.54677	5.6383	11.8549	0.00139096	0.0375313	19	4	Up-regulated
Sus_scrofa___ENSSSCG00000005103	1.57218	5.08455	11.7611	0.00140192	0.0377381	19	4	Up-regulated
Sus_scrofa___CSTF2	2.11162	4.81988	11.6187	0.00141653	0.0380417	19	4	Up-regulated
Sus_scrofa___OAS2	3.14729	8.79282	11.787	0.00143417	0.0384253	19	4	Up-regulated
Sus_scrofa___CCND1	1.79279	6.25595	11.7674	0.00144995	0.0386092	19	4	Up-regulated
Sus_scrofa___PSMA3	1.16498	6.36102	11.7696	0.0014516	0.0386092	19	4	Up-regulated
Sus_scrofa___PRKAR2A	1.07164	7.64939	11.7138	0.00147829	0.0390585	19	4	Up-regulated
Sus_scrofa___PLAGL1	1.08775	7.50874	11.6637	0.00150959	0.0397794	19	4	Up-regulated
Sus_scrofa___ENSSSCG00000015814	0.914652	7.85995	11.6564	0.00151302	0.0397794	19	4	Up-regulated
Sus_scrofa___UGP2	1.51128	7.15539	11.658	0.00151512	0.0397794	19	4	Up-regulated
Sus_scrofa___PTAR1	1.5218	6.18409	11.6564	0.00151948	0.0397794	19	4	Up-regulated
Sus_scrofa___PRMT3	0.958137	7.60242	11.6366	0.00152617	0.039909	19	4	Up-regulated
Sus_scrofa___SLC17A9	4.54293	4.09576	11.4026	0.001546	0.0403663	19	4	Up-regulated
Sus_scrofa___OTUD7B	1.36497	6.75236	11.6015	0.00155311	0.0404747	19	4	Up-regulated
Sus_scrofa___ISG15	5.04556	6.76271	11.4025	0.00155616	0.040508	19	4	Up-regulated
Sus_scrofa___MX1	3.46978	7.76987	11.579	0.0015601	0.0405182	19	4	Up-regulated
Sus_scrofa___RSAD2	5.35511	6.57878	11.359	0.00159511	0.0412871	19	4	Up-regulated
Sus_scrofa___SOCS4	1.49464	5.20675	11.4416	0.0016195	0.0417296	19	4	Up-regulated
Sus_scrofa___SLC41A2	1.51286	6.17798	11.4973	0.00162257	0.0417616	19	4	Up-regulated
Sus_scrofa___BST2	4.13456	6.25102	11.2991	0.00164418	0.0422607	19	4	Up-regulated
Sus_scrofa___SPOCK1	3.01398	7.5253	11.4506	0.00164768	0.0422651	19	4	Up-regulated
Sus_scrofa___AMBRA1	0.790978	8.37498	11.436	0.00165643	0.042442	19	4	Up-regulated
Sus_scrofa___ENSSSCG00000011676	1.72413	6.45101	11.4411	0.0016599	0.0424834	19	4	Up-regulated
Sus_scrofa___LITAF	1.0228	6.94883	11.4215	0.00167151	0.0425438	19	4	Up-regulated
Sus_scrofa___ENSSSCG00000004578	1.47419	6.5697	11.4249	0.00167159	0.0425438	19	4	Up-regulated
Sus_scrofa___PSMB2	1.23045	6.59317	11.4246	0.00167192	0.0425438	19	4	Up-regulated
Sus_scrofa___HOOK3	0.842331	7.52359	11.4141	0.00167342	0.0425438	19	4	Up-regulated
Sus_scrofa___SNX10	1.49002	7.33706	11.3679	0.00170715	0.0430684	19	4	Up-regulated
Sus_scrofa___ADM	4.80928	4.30646	11.2538	0.00170888	0.0430684	19	4	Up-regulated
Sus_scrofa___LIN7A	1.84877	5.89307	11.3387	0.00172351	0.0433834	19	4	Up-regulated
Sus_scrofa___RAD23A	2.06341	4.78375	11.1254	0.00174339	0.0437996	19	4	Up-regulated
Sus_scrofa___B4GALT5	0.933831	8.21433	11.2977	0.00175451	0.0440125	19	4	Up-regulated
Sus_scrofa___ENSSSCG00000042008	4.12965	3.89861	10.9319	0.00178178	0.0443128	19	4	Up-regulated
Sus_scrofa___MARK1	1.3102	7.95828	11.2615	0.00178181	0.0443128	19	4	Up-regulated
Sus_scrofa___SLC39A6	1.54527	5.70361	11.2577	0.00178293	0.0443128	19	4	Up-regulated
Sus_scrofa___IGF2BP2	1.8162	7.42557	11.1605	0.00186096	0.0458842	19	4	Up-regulated
Sus_scrofa___ANXA5	1.01603	7.90215	11.1366	0.00187706	0.0460826	19	4	Up-regulated
Sus_scrofa___ENSSSCG00000038829	1.75512	4.93717	11.0093	0.00188292	0.046177	19	4	Up-regulated
Sus_scrofa___AMH	1.82479	5.0961	11.0373	0.00188593	0.0462011	19	4	Up-regulated
Sus_scrofa___XPNPEP3	1.24828	5.8628	11.1015	0.00191181	0.0466356	19	4	Up-regulated
Sus_scrofa___PGGT1B	1.16671	6.08327	11.0964	0.00191835	0.0466766	19	4	Up-regulated
Sus_scrofa___KHDRBS3	3.13793	6.32041	11.0116	0.00193981	0.0468212	19	4	Up-regulated
Sus_scrofa___ZBTB38	1.04096	7.50589	11.0393	0.00195636	0.0469791	19	4	Up-regulated
Sus_scrofa___ATP13A1	2.54272	4.32919	10.7264	0.00195669	0.0469791	19	4	Up-regulated
Sus_scrofa___MAPK1IP1L	1.30537	5.56957	11.0096	0.00197707	0.0473193	19	4	Up-regulated
Sus_scrofa___PLCH1	3.63121	3.68894	10.5329	0.00200048	0.0477299	19	4	Up-regulated
Sus_scrofa___LAMB1	1.35282	7.85924	10.9795	0.00200493	0.0477862	19	4	Up-regulated
Sus_scrofa___ZNF800	1.20555	5.90715	10.9847	0.00200847	0.0478207	19	4	Up-regulated
Sus_scrofa___YWHAZ	0.941832	7.60937	10.9727	0.00201121	0.0478364	19	4	Up-regulated
Sus_scrofa___MTO1	1.88404	5.36267	10.9094	0.00202624	0.0481438	19	4	Up-regulated
Sus_scrofa___MAPKAPK2	1.20359	6.28825	10.9006	0.00208187	0.0492608	19	4	Up-regulated
Sus_scrofa___KLF10	1.74238	5.0869	10.803	0.00208685	0.0493192	19	4	Up-regulated
Sus_scrofa___STC1	2.30653	6.09357	10.8698	0.00208942	0.0493192	19	4	Up-regulated
Sus_scrofa___PLVAP	2.79289	4.52324	10.6188	0.00209613	0.049394	19	4	Up-regulated
Sus_scrofa___ZNFX1	2.02797	7.57547	10.8553	0.00211436	0.0497211	19	4	Up-regulated
Sus_scrofa___FKBP5	1.43622	9.41904	10.8292	0.00213368	0.0499189	19	4	Up-regulated
Sus_scrofa___ABCA8	-4.35277	7.11122	217.362	1.28682e-17	2.94437e-13	19	4	Down-regulated
Sus_scrofa___PTPRQ	-5.28406	5.63647	133.536	5.84692e-17	6.68916e-13	19	4	Down-regulated
Sus_scrofa___ST6GALNAC5	-3.86149	5.23285	111.558	1.66993e-14	1.27365e-10	19	4	Down-regulated
Sus_scrofa___ENSSSCG00000012101	-3.67261	4.95619	99.6087	6.78353e-14	3.10428e-10	19	4	Down-regulated
Sus_scrofa___ADAM28	-3.93058	4.32654	84.2663	3.36866e-13	1.10113e-09	19	4	Down-regulated
Sus_scrofa___SCN7A	-3.78782	5.40424	97.6358	3.36868e-13	1.10113e-09	19	4	Down-regulated
Sus_scrofa___SYT9	-3.69062	5.92315	104.777	4.75754e-13	1.36071e-09	19	4	Down-regulated
Sus_scrofa___MYL7	-5.38728	4.8714	79.8616	1.74419e-12	4.4343e-09	19	4	Down-regulated
Sus_scrofa___LAMA3	-3.51493	4.55886	67.2581	2.28687e-11	5.23258e-08	19	4	Down-regulated
Sus_scrofa___COQ8A	-3.42708	4.98074	59.3473	3.52538e-10	7.33311e-07	19	4	Down-regulated
Sus_scrofa___ENSSSCG00000015747	-4.57367	7.1583	65.7566	5.88517e-10	1.05591e-06	19	4	Down-regulated
Sus_scrofa___ANKRD39	-3.91468	5.42404	58.1892	5.99923e-10	1.05591e-06	19	4	Down-regulated
Sus_scrofa___ST6GALNAC3	-2.80555	6.66664	66.0096	7.00006e-10	1.06709e-06	19	4	Down-regulated
Sus_scrofa___CKM	-3.65119	4.94723	55.2536	7.22136e-10	1.06709e-06	19	4	Down-regulated
Sus_scrofa___ADAMTS16	-3.39111	5.46181	60.6341	7.46185e-10	1.06709e-06	19	4	Down-regulated
Sus_scrofa___ARHGAP44	-3.00895	6.41701	64.1615	9.31737e-10	1.25406e-06	19	4	Down-regulated
Sus_scrofa___KLHL13	-2.74434	6.37954	63.9268	1.00077e-09	1.27215e-06	19	4	Down-regulated
Sus_scrofa___EPHB1	-3.04352	5.83149	61.457	1.16699e-09	1.39623e-06	19	4	Down-regulated
Sus_scrofa___CPT1B	-4.28276	4.70528	50.7987	1.22043e-09	1.39623e-06	19	4	Down-regulated
Sus_scrofa___ADA	-2.54945	5.42104	59.5285	1.48329e-09	1.61615e-06	19	4	Down-regulated
Sus_scrofa___ENSSSCG00000048674	-4.08316	4.2819	49.0899	2.27397e-09	2.36503e-06	19	4	Down-regulated
Sus_scrofa___ENSSSCG00000033414	-4.22555	4.54189	48.3767	2.41805e-09	2.40554e-06	19	4	Down-regulated
Sus_scrofa___SAMD5	-2.66529	5.5225	55.6794	3.6088e-09	3.36133e-06	19	4	Down-regulated
Sus_scrofa___RNF207	-4.58453	4.19054	50.0575	3.67262e-09	3.36133e-06	19	4	Down-regulated
Sus_scrofa___VSTM1	-3.78368	4.20968	46.6085	4.11742e-09	3.62348e-06	19	4	Down-regulated
Sus_scrofa___HMCN1	-2.39042	7.58443	56.1587	4.83273e-09	4.09547e-06	19	4	Down-regulated
Sus_scrofa___KCP	-3.10035	5.69537	53.1842	5.76986e-09	4.62334e-06	19	4	Down-regulated
Sus_scrofa___KIAA1109	-1.562	8.0375	55.1442	5.85975e-09	4.62334e-06	19	4	Down-regulated
Sus_scrofa___MYOM3	-3.28866	4.3661	45.164	6.89618e-09	5.15978e-06	19	4	Down-regulated
Sus_scrofa___SH3RF2	-2.93726	7.43972	54.4527	6.99065e-09	5.15978e-06	19	4	Down-regulated
Sus_scrofa___ENSSSCG00000038192	-2.89857	4.55778	46.1724	8.17613e-09	5.84619e-06	19	4	Down-regulated
Sus_scrofa___DDX4	-2.08953	5.93346	52.9587	8.96978e-09	6.21932e-06	19	4	Down-regulated
Sus_scrofa___ART3	-3.50918	4.59014	44.5392	9.43102e-09	6.3468e-06	19	4	Down-regulated
Sus_scrofa___ABCA9	-2.63864	5.66607	50.8058	1.14206e-08	7.46614e-06	19	4	Down-regulated
Sus_scrofa___MTUS2	-2.87432	6.35532	51.0946	1.35268e-08	8.59738e-06	19	4	Down-regulated
Sus_scrofa___ENSSSCG00000043817	-1.87553	7.52614	50.6564	1.55772e-08	9.40188e-06	19	4	Down-regulated
Sus_scrofa___CORO2B	-1.88763	6.68527	50.7371	1.56143e-08	9.40188e-06	19	4	Down-regulated
Sus_scrofa___CNTN4	-2.83126	5.93128	48.7264	2.02805e-08	1.18984e-05	19	4	Down-regulated
Sus_scrofa___PCP4	-3.69068	5.37854	43.7782	2.524e-08	1.44379e-05	19	4	Down-regulated
Sus_scrofa___RFTN2	-1.61932	7.10605	47.5457	3.15575e-08	1.76114e-05	19	4	Down-regulated
Sus_scrofa___SLC4A11	-2.29071	6.10252	46.8223	3.60154e-08	1.96207e-05	19	4	Down-regulated
Sus_scrofa___RIPOR2	-3.08976	4.38346	39.4832	4.12132e-08	2.1721e-05	19	4	Down-regulated
Sus_scrofa___RORA	-1.28216	11.4876	46.2065	4.17694e-08	2.1721e-05	19	4	Down-regulated
Sus_scrofa___DOCK6	-1.59826	7.07947	46.1738	4.32962e-08	2.20147e-05	19	4	Down-regulated
Sus_scrofa___TNNT2	-3.40361	7.34712	46.0637	4.48125e-08	2.22903e-05	19	4	Down-regulated
Sus_scrofa___ENSSSCG00000036052	-3.37743	6.32648	45.1515	4.78854e-08	2.33121e-05	19	4	Down-regulated
Sus_scrofa___FGF13	-3.22388	6.40545	44.9729	5.259e-08	2.5069e-05	19	4	Down-regulated
Sus_scrofa___PTPRT	-2.70339	7.07026	44.8814	5.91162e-08	2.76048e-05	19	4	Down-regulated
Sus_scrofa___ATP8A1	-2.71637	5.61935	43.3333	6.36668e-08	2.91352e-05	19	4	Down-regulated
Sus_scrofa___CADM1	-3.2051	5.22567	40.9131	6.61753e-08	2.96894e-05	19	4	Down-regulated
Sus_scrofa___COLEC12	-1.99029	7.26081	44.1614	6.94377e-08	3.05539e-05	19	4	Down-regulated
Sus_scrofa___ADGRV1	-1.66729	9.23172	43.7637	7.44906e-08	3.21589e-05	19	4	Down-regulated
Sus_scrofa___ENSSSCG00000021374	-3.41677	4.05961	36.67	8.88465e-08	3.76462e-05	19	4	Down-regulated
Sus_scrofa___OSR1	-2.35678	5.33028	41.4613	9.56722e-08	3.98014e-05	19	4	Down-regulated
Sus_scrofa___NRIP2	-2.62814	4.84991	39.2912	9.9291e-08	4.05692e-05	19	4	Down-regulated
Sus_scrofa___CYSLTR2	-1.59699	7.07254	42.4111	1.05869e-07	4.108e-05	19	4	Down-regulated
Sus_scrofa___MACROD1	-3.38608	4.23199	36.0396	1.05927e-07	4.108e-05	19	4	Down-regulated
Sus_scrofa___RALGPS2	-1.93303	7.66986	42.2148	1.0995e-07	4.19293e-05	19	4	Down-regulated
Sus_scrofa___ENSSSCG00000003261	-3.35016	4.05437	35.9284	1.12373e-07	4.20724e-05	19	4	Down-regulated
Sus_scrofa___ENSSSCG00000017643	-1.84315	7.33813	42.0909	1.14002e-07	4.20724e-05	19	4	Down-regulated
Sus_scrofa___MYL3	-3.20343	5.62778	39.4831	1.40743e-07	5.00407e-05	19	4	Down-regulated
Sus_scrofa___NDUFA4	-3.44796	5.33699	38.066	1.4199e-07	5.00407e-05	19	4	Down-regulated
Sus_scrofa___GPC3	-1.99304	8.23937	41.1379	1.42155e-07	5.00407e-05	19	4	Down-regulated
Sus_scrofa___LDB2	-1.26857	10.4234	40.1796	1.79315e-07	6.12375e-05	19	4	Down-regulated
Sus_scrofa___DEPTOR	-1.63472	6.87975	40.2079	1.83147e-07	6.16263e-05	19	4	Down-regulated
Sus_scrofa___SEMA6D	-1.73298	7.84884	40.0145	1.88818e-07	6.26137e-05	19	4	Down-regulated
Sus_scrofa___PAPLN	-2.13075	6.67734	39.9673	1.95239e-07	6.30012e-05	19	4	Down-regulated
Sus_scrofa___EPB41L3	-2.57548	6.53182	39.9164	1.95494e-07	6.30012e-05	19	4	Down-regulated
Sus_scrofa___CDH8	-3.42571	4.10851	34.1487	2.00858e-07	6.3831e-05	19	4	Down-regulated
Sus_scrofa___DLGAP2	-2.49573	6.08759	39.2605	2.19882e-07	6.89196e-05	19	4	Down-regulated
Sus_scrofa___SGSM1	-2.46944	4.81807	35.9124	2.5754e-07	7.89321e-05	19	4	Down-regulated
Sus_scrofa___RAP1GAP2	-2.77737	4.71197	35.123	2.58726e-07	7.89321e-05	19	4	Down-regulated
Sus_scrofa___TXLNB	-3.09421	5.50003	36.9387	2.71086e-07	7.98025e-05	19	4	Down-regulated
Sus_scrofa___CD4	-2.54161	6.32926	38.5588	2.72042e-07	7.98025e-05	19	4	Down-regulated
Sus_scrofa___SLITRK6	-4.49282	3.60761	43.2535	3.32546e-07	9.63162e-05	19	4	Down-regulated
Sus_scrofa___ITGB6	-3.18374	4.99971	34.084	3.92232e-07	0.000112183	19	4	Down-regulated
Sus_scrofa___PLCB4	-1.76499	10.5416	36.6158	4.48584e-07	0.000126717	19	4	Down-regulated
Sus_scrofa___CYP2B22	-3.01518	4.13799	31.5064	4.85618e-07	0.000134401	19	4	Down-regulated
Sus_scrofa___PMFBP1	-2.51595	5.3152	35.194	4.87536e-07	0.000134401	19	4	Down-regulated
Sus_scrofa___ENSSSCG00000024162	-2.26054	7.2873	36.321	4.95659e-07	0.000134773	19	4	Down-regulated
Sus_scrofa___MYL2	-3.50849	7.07757	36.235	5.04185e-07	0.000134773	19	4	Down-regulated
Sus_scrofa___RXFP1	-2.98848	4.58708	32.3251	5.06554e-07	0.000134773	19	4	Down-regulated
Sus_scrofa___SAT1	-1.61264	8.25465	36.1279	5.12717e-07	0.000134845	19	4	Down-regulated
Sus_scrofa___EFCC1	-2.76664	4.18445	30.9215	6.302e-07	0.000162018	19	4	Down-regulated
Sus_scrofa___RXRG	-3.8433	3.78842	32.7438	6.40943e-07	0.000162949	19	4	Down-regulated
Sus_scrofa___ENSSSCG00000011121	-1.39198	8.55097	34.8419	7.21987e-07	0.000181536	19	4	Down-regulated
Sus_scrofa___A2M	-2.33762	6.89279	34.3102	8.53882e-07	0.000207848	19	4	Down-regulated
Sus_scrofa___CEP85	-2.85007	4.58915	30.8412	8.64136e-07	0.000208129	19	4	Down-regulated
Sus_scrofa___SCN5A	-2.81863	4.94133	31.4925	9.51596e-07	0.000226807	19	4	Down-regulated
Sus_scrofa___CXCL12	-2.45679	5.13249	32.2912	9.8678e-07	0.000232768	19	4	Down-regulated
Sus_scrofa___TMEM266	-3.44939	3.65954	31.0713	1.06864e-06	0.000249506	19	4	Down-regulated
Sus_scrofa___EEF1A2	-2.90802	4.15926	29.2353	1.09014e-06	0.000251955	19	4	Down-regulated
Sus_scrofa___ENSSSCG00000015632	-2.97537	4.38827	29.4913	1.10516e-06	0.000252872	19	4	Down-regulated
Sus_scrofa___DLG2	-2.48051	9.22861	33.2114	1.12675e-06	0.000252937	19	4	Down-regulated
Sus_scrofa___PTP4A3	-2.87742	4.03959	29.0637	1.12756e-06	0.000252937	19	4	Down-regulated
Sus_scrofa___GAS6	-3.06455	4.21721	29.0538	1.153e-06	0.000256133	19	4	Down-regulated
Sus_scrofa___AUTS2	-1.18141	10.814	32.8672	1.23754e-06	0.00026857	19	4	Down-regulated
Sus_scrofa___ADORA2A	-1.77323	5.69923	32.7442	1.24419e-06	0.00026857	19	4	Down-regulated
Sus_scrofa___PPP1R14C	-3.1154	4.28355	28.8249	1.27872e-06	0.000273442	19	4	Down-regulated
Sus_scrofa___TNFRSF21	-1.63812	9.70192	32.5447	1.35447e-06	0.00028696	19	4	Down-regulated
Sus_scrofa___ESRRG	-2.81294	6.1599	32.3625	1.37032e-06	0.000287654	19	4	Down-regulated
Sus_scrofa___PLXDC2	-1.04978	10.7841	32.2296	1.4789e-06	0.000304327	19	4	Down-regulated
Sus_scrofa___P2RY14	-1.51131	6.40852	32.2915	1.48965e-06	0.000304327	19	4	Down-regulated
Sus_scrofa___FRMD4B	-2.02579	6.51585	32.2266	1.51515e-06	0.000306797	19	4	Down-regulated
Sus_scrofa___TTC21B	-1.30841	7.07022	32.0515	1.5807e-06	0.000317263	19	4	Down-regulated
Sus_scrofa___ADRA1A	-3.31492	4.16083	28.0337	1.61921e-06	0.000322167	19	4	Down-regulated
Sus_scrofa___COL22A1	-2.74554	4.21401	28.1024	1.72491e-06	0.000340238	19	4	Down-regulated
Sus_scrofa___PER2	-2.1937	5.73653	31.2396	1.85109e-06	0.000362006	19	4	Down-regulated
Sus_scrofa___KCNH2	-3.83579	3.80123	29.2074	1.91103e-06	0.000370562	19	4	Down-regulated
Sus_scrofa___MYH7B	-3.11919	5.68023	30.4146	1.93574e-06	0.000372199	19	4	Down-regulated
Sus_scrofa___BCAS3	-1.10396	10.4681	31.1688	1.99686e-06	0.000377605	19	4	Down-regulated
Sus_scrofa___ENSSSCG00000027921	-3.09583	3.94375	27.3025	2.16908e-06	0.000403503	19	4	Down-regulated
Sus_scrofa___DPF3	-2.70227	4.90158	28.8812	2.1985e-06	0.000405676	19	4	Down-regulated
Sus_scrofa___TBX19	-3.9327	4.11979	27.4597	2.22057e-06	0.000406471	19	4	Down-regulated
Sus_scrofa___SPARCL1	-1.42659	9.32306	30.5323	2.39793e-06	0.000435453	19	4	Down-regulated
Sus_scrofa___COX7A1	-3.12039	4.97074	28.265	2.45715e-06	0.000442694	19	4	Down-regulated
Sus_scrofa___ENSSSCG00000016437	-2.39321	6.14319	30.0569	2.72855e-06	0.000485473	19	4	Down-regulated
Sus_scrofa___RASSF4	-2.67257	4.1302	26.7708	2.73703e-06	0.000485473	19	4	Down-regulated
Sus_scrofa___SLC41A1	-2.83059	4.59795	27.0507	3.08379e-06	0.000540391	19	4	Down-regulated
Sus_scrofa___RAI2	-3.19001	4.03228	26.2719	3.09389e-06	0.000540391	19	4	Down-regulated
Papio_anubis_TTN	-3.54084	3.8046	26.8379	3.2679e-06	0.000566461	19	4	Down-regulated
Sus_scrofa___LRRC36	-2.76392	4.46615	26.7195	3.29898e-06	0.000567549	19	4	Down-regulated
Sus_scrofa___SLIT2	-1.72101	7.72147	29.2357	3.52267e-06	0.00060151	19	4	Down-regulated
Sus_scrofa___ABCA6	-2.33786	4.89041	27.7275	3.61072e-06	0.000609836	19	4	Down-regulated
Sus_scrofa___EBI3	-1.58729	5.5295	28.9693	3.62474e-06	0.000609836	19	4	Down-regulated
Sus_scrofa___DPP4	-2.92896	5.44759	27.9364	3.91203e-06	0.000650437	19	4	Down-regulated
Sus_scrofa___ASB4	-2.71424	5.13934	27.5748	3.92292e-06	0.000650437	19	4	Down-regulated
Sus_scrofa___MRAS	-2.61784	4.86335	27.0471	4.02842e-06	0.000659133	19	4	Down-regulated
Sus_scrofa___SRL	-2.7705	5.01837	27.1723	4.06179e-06	0.000659133	19	4	Down-regulated
Sus_scrofa___MYBPC3	-3.05113	8.09686	28.6528	4.19859e-06	0.000676535	19	4	Down-regulated
Sus_scrofa___TMEM86A	-2.10609	4.88492	27.2551	4.36737e-06	0.00069881	19	4	Down-regulated
Sus_scrofa___ENSSSCG00000031608	-2.85729	5.15012	26.8769	4.70037e-06	0.000741718	19	4	Down-regulated
Sus_scrofa___GABRA4	-3.08853	4.05291	25.0111	4.86053e-06	0.00075703	19	4	Down-regulated
Sus_scrofa___CDK18	-3.70312	3.67285	26.9896	4.86357e-06	0.00075703	19	4	Down-regulated
Sus_scrofa___PRLR	-2.99893	3.8459	25.0883	4.90558e-06	0.000758409	19	4	Down-regulated
Sus_scrofa___UNKL	-1.21672	7.35729	28.033	5.04192e-06	0.000774256	19	4	Down-regulated
Sus_scrofa___MYOF	-1.41353	8.37784	27.8266	5.32533e-06	0.000810135	19	4	Down-regulated
Sus_scrofa___CORIN	-2.93751	6.31704	27.7395	5.34638e-06	0.000810135	19	4	Down-regulated
Sus_scrofa___SLC37A1	-1.94769	5.23372	27.2794	5.38348e-06	0.000810391	19	4	Down-regulated
Sus_scrofa___NCEH1	-2.54723	5.54979	27.2765	5.43943e-06	0.000813462	19	4	Down-regulated
Sus_scrofa___WRAP73	-1.47837	6.14268	27.7142	5.58571e-06	0.000829913	19	4	Down-regulated
Sus_scrofa___ATP5F1A	-2.21207	4.61538	25.7537	5.87454e-06	0.000865624	19	4	Down-regulated
Sus_scrofa___DNAJC6	-1.51153	6.51583	27.5435	5.90172e-06	0.000865624	19	4	Down-regulated
Sus_scrofa___MCF2L	-2.58968	3.86911	24.3487	6.20346e-06	0.000904086	19	4	Down-regulated
Sus_scrofa___LRRC71	-2.31342	4.16187	24.5843	6.42494e-06	0.000930437	19	4	Down-regulated
Sus_scrofa___ENSSSCG00000004598	-2.70545	5.01246	25.7755	6.5553e-06	0.000943345	19	4	Down-regulated
Sus_scrofa___RGL1	-1.19216	6.9513	27.058	6.79889e-06	0.000966244	19	4	Down-regulated
Sus_scrofa___OSBPL3	-2.5695	5.2864	26.0981	7.1546e-06	0.00100432	19	4	Down-regulated
Sus_scrofa___DOCK2	-2.5733	3.83134	23.9231	7.28417e-06	0.00101357	19	4	Down-regulated
Sus_scrofa___COX4I2	-1.60247	6.40165	26.8357	7.30906e-06	0.00101357	19	4	Down-regulated
Sus_scrofa___ENO3	-3.42402	3.79125	24.3987	7.62281e-06	0.00104442	19	4	Down-regulated
Sus_scrofa___SRPX	-1.78596	5.06987	25.9564	7.89066e-06	0.00107468	19	4	Down-regulated
Sus_scrofa___SPNS2	-2.75096	3.97778	23.6585	8.06962e-06	0.00109255	19	4	Down-regulated
Sus_scrofa___EMILIN2	-2.7067	3.99792	23.6279	8.20085e-06	0.00110379	19	4	Down-regulated
Sus_scrofa___OSBPL11	-1.53696	5.66633	26.2111	8.5264e-06	0.00114089	19	4	Down-regulated
Sus_scrofa___RRAD	-2.65919	5.4746	25.62	8.74719e-06	0.00116363	19	4	Down-regulated
Sus_scrofa___SAMSN1	-2.06565	4.68175	24.7668	8.91684e-06	0.00117934	19	4	Down-regulated
Sus_scrofa___CCDC69	-2.66139	4.48082	23.9644	8.9934e-06	0.00118263	19	4	Down-regulated
Sus_scrofa___PRKCB	-1.78778	4.9789	25.3277	9.22941e-06	0.00120223	19	4	Down-regulated
Sus_scrofa___PDE4D	-2.1202	10.2167	25.7374	1.00636e-05	0.00128664	19	4	Down-regulated
Sus_scrofa___ND5	-2.31898	5.63464	25.4607	1.0184e-05	0.00129455	19	4	Down-regulated
Sus_scrofa___MYLK3	-2.74326	4.99462	24.3479	1.03347e-05	0.00130645	19	4	Down-regulated
Sus_scrofa___TARS3	-3.16992	3.90526	22.9336	1.11258e-05	0.0013911	19	4	Down-regulated
Sus_scrofa___SCN9A	-1.72595	6.87429	25.4115	1.13145e-05	0.00139939	19	4	Down-regulated
Papio_anubis_SEPTIN7	-2.42891	4.47212	23.3611	1.17379e-05	0.00144395	19	4	Down-regulated
Sus_scrofa___UNC45B	-2.59543	4.56261	23.3205	1.18746e-05	0.00145295	19	4	Down-regulated
Sus_scrofa___SNX2	-1.33868	6.51002	25.1471	1.23155e-05	0.0014953	19	4	Down-regulated
Sus_scrofa___DBP	-3.56094	3.65083	24.1104	1.23513e-05	0.0014953	19	4	Down-regulated
Sus_scrofa___ASPDH	-2.70217	7.68501	25.0515	1.26188e-05	0.00151266	19	4	Down-regulated
Sus_scrofa___LHFPL1	-2.81021	3.80251	22.5373	1.27015e-05	0.00151266	19	4	Down-regulated
Sus_scrofa___CLK1	-1.19262	7.7789	25.003	1.27214e-05	0.00151266	19	4	Down-regulated
Sus_scrofa___CASZ1	-3.03308	4.4035	22.6535	1.2772e-05	0.00151266	19	4	Down-regulated
Sus_scrofa___ENSSSCG00000041213	-1.98684	4.86506	24.0512	1.28253e-05	0.00151266	19	4	Down-regulated
Sus_scrofa___CHCHD10	-2.93119	4.58404	22.8717	1.30905e-05	0.00153602	19	4	Down-regulated
Sus_scrofa___SPECC1	-1.56679	6.93921	24.8902	1.33071e-05	0.00155347	19	4	Down-regulated
Sus_scrofa___MYH7	-2.58252	7.85329	24.815	1.35585e-05	0.00157478	19	4	Down-regulated
Sus_scrofa___NPNT	-2.82931	4.11494	22.2353	1.40354e-05	0.00162194	19	4	Down-regulated
Sus_scrofa___WDR91	-1.76361	5.33711	24.3691	1.4288e-05	0.00163618	19	4	Down-regulated
Sus_scrofa___ATP1B4	-3.15539	3.83529	22.362	1.43017e-05	0.00163618	19	4	Down-regulated
Sus_scrofa___HMCN2	-2.6324	4.50357	22.6151	1.52686e-05	0.00172098	19	4	Down-regulated
Sus_scrofa___CYTB	-2.35898	6.26363	24.3866	1.54492e-05	0.00173281	19	4	Down-regulated
Sus_scrofa___ENSSSCG00000014314	-3.44536	3.50967	24.0771	1.60043e-05	0.00177759	19	4	Down-regulated
Sus_scrofa___ARHGAP6	-1.01748	9.94784	24.2498	1.60776e-05	0.00177759	19	4	Down-regulated
Sus_scrofa___CAMK2A	-2.63834	5.6887	23.9464	1.60815e-05	0.00177759	19	4	Down-regulated
Sus_scrofa___ATG4C	-1.40758	6.20534	24.0862	1.71977e-05	0.00188554	19	4	Down-regulated
Sus_scrofa___PCSK6	-1.97521	5.94288	24.0222	1.72229e-05	0.00188554	19	4	Down-regulated
Sus_scrofa___ADCY6	-2.12169	6.24701	23.9745	1.77029e-05	0.00192547	19	4	Down-regulated
Sus_scrofa___TNS3	-1.61515	6.52791	23.9903	1.7756e-05	0.00192547	19	4	Down-regulated
Sus_scrofa___ZNF385D	-1.81689	7.5691	23.8867	1.81936e-05	0.00196362	19	4	Down-regulated
Sus_scrofa___CYSLTR1	-1.47354	6.89204	23.8128	1.87443e-05	0.00201356	19	4	Down-regulated
Sus_scrofa___SERTAD4	-2.23506	4.47783	22.0965	1.94977e-05	0.00207853	19	4	Down-regulated
Sus_scrofa___GRIA1	-2.47417	4.55303	21.9631	1.9952e-05	0.00211352	19	4	Down-regulated
Sus_scrofa___IL10RA	-2.73265	3.74392	21.3759	2.0215e-05	0.00213152	19	4	Down-regulated
Sus_scrofa___ARHGEF3	-1.82924	5.33489	23.2136	2.06419e-05	0.00216655	19	4	Down-regulated
Sus_scrofa___ENSSSCG00000040016	-3.47065	3.51346	23.1267	2.18729e-05	0.00227488	19	4	Down-regulated
Sus_scrofa___NM_001206399	-2.38458	5.18928	22.6434	2.21689e-05	0.0022849	19	4	Down-regulated
Sus_scrofa___RNF144A	-1.81095	5.52605	23.0011	2.29616e-05	0.00234546	19	4	Down-regulated
Sus_scrofa___TMEM94	-1.83143	6.42054	23.0659	2.38942e-05	0.00241913	19	4	Down-regulated
Sus_scrofa___ADGRD1	-1.24308	7.55675	22.9766	2.43794e-05	0.00245738	19	4	Down-regulated
Sus_scrofa___FOXN3	-1.00272	9.30831	22.9427	2.45166e-05	0.00246037	19	4	Down-regulated
Sus_scrofa___KIF3A	-1.00715	7.37625	22.8703	2.52611e-05	0.00252401	19	4	Down-regulated
Sus_scrofa___TTN	-2.46463	11.7109	22.7336	2.62425e-05	0.00261067	19	4	Down-regulated
Sus_scrofa___PTDSS1	-2.45894	4.83989	21.5822	2.70522e-05	0.0026638	19	4	Down-regulated
Sus_scrofa___LDLRAD3	-1.34452	7.71856	22.6437	2.71543e-05	0.0026638	19	4	Down-regulated
Sus_scrofa___PYGB	-2.74607	6.02608	22.5056	2.72422e-05	0.0026638	19	4	Down-regulated
Sus_scrofa___CDK14	-0.903042	9.99427	22.564	2.77469e-05	0.00270161	19	4	Down-regulated
Sus_scrofa___ZFYVE16	-1.0596	7.46377	22.4951	2.85492e-05	0.00276794	19	4	Down-regulated
Sus_scrofa___VWF	-1.82715	5.04887	21.9836	2.87758e-05	0.00277814	19	4	Down-regulated
Sus_scrofa___OBSCN	-2.56157	6.11203	22.3805	2.89912e-05	0.00278717	19	4	Down-regulated
Sus_scrofa___ACSF2	-1.39459	6.14041	22.4191	2.94705e-05	0.00281432	19	4	Down-regulated
Sus_scrofa___NTF3	-1.29366	7.63887	22.3758	2.96652e-05	0.00281647	19	4	Down-regulated
Papio_anubis_TIAL1	-2.78038	3.63695	20.271	3.33762e-05	0.00314272	19	4	Down-regulated
Sus_scrofa___ENSSSCG00000039825	-2.7691	3.87696	19.9593	3.39083e-05	0.00317148	19	4	Down-regulated
Sus_scrofa___ENSSSCG00000022773	-1.53559	5.63437	21.8979	3.39588e-05	0.00317148	19	4	Down-regulated
Sus_scrofa___GIPC2	-2.68269	4.4768	20.312	3.43232e-05	0.0031886	19	4	Down-regulated
Sus_scrofa___IFN-DELTA-1	-4.29463	3.30395	26.7627	3.44209e-05	0.0031886	19	4	Down-regulated
Sus_scrofa___FAM180A	-2.49223	3.97591	19.903	3.46997e-05	0.00320146	19	4	Down-regulated
Sus_scrofa___NDUFB2	-2.58507	4.39932	20.1396	3.59179e-05	0.00329371	19	4	Down-regulated
Sus_scrofa___PLA2G7	-2.6826	4.89326	20.7148	3.59874e-05	0.00329371	19	4	Down-regulated
Sus_scrofa___AGL	-2.26492	4.9792	21.0003	3.6531e-05	0.00333014	19	4	Down-regulated
Sus_scrofa___TPM2	-2.27777	6.66309	21.699	3.74491e-05	0.00340029	19	4	Down-regulated
Sus_scrofa___ENSSSCG00000038537	-4.12236	3.38087	25.0305	3.76659e-05	0.00340111	19	4	Down-regulated
Sus_scrofa___SLC44A5	-2.34164	5.72876	21.4883	3.77555e-05	0.00340111	19	4	Down-regulated
Sus_scrofa___CCDC167	-2.18036	5.02787	21.0532	3.81395e-05	0.00342224	19	4	Down-regulated
Sus_scrofa___ENSSSCG00000032029	-2.24898	4.51723	20.329	3.84797e-05	0.00343927	19	4	Down-regulated
Sus_scrofa___TMEM132C	-1.96402	5.85883	21.5372	3.86423e-05	0.00344037	19	4	Down-regulated
Sus_scrofa___PDE4DIP	-2.31325	7.45769	21.5357	3.94003e-05	0.00349426	19	4	Down-regulated
Sus_scrofa___FAM200A	-1.79538	4.96453	20.968	3.97583e-05	0.00351236	19	4	Down-regulated
Sus_scrofa___RIN2	-1.14335	7.80414	21.4788	3.99114e-05	0.00351236	19	4	Down-regulated
Sus_scrofa___HADHA	-2.08919	5.04605	20.8675	4.03087e-05	0.00353373	19	4	Down-regulated
Papio_anubis_ENSPANG00000016983	-2.94915	3.93456	19.4585	4.12428e-05	0.00360182	19	4	Down-regulated
Sus_scrofa___INPP5B	-1.27122	6.95871	21.365	4.17457e-05	0.00363187	19	4	Down-regulated
Sus_scrofa___LMOD2	-2.51621	4.53433	19.8494	4.31018e-05	0.00371446	19	4	Down-regulated
Sus_scrofa___SPTB	-2.43223	4.67958	20.1149	4.3182e-05	0.00371446	19	4	Down-regulated
Sus_scrofa___NEB	-2.86491	3.85559	19.3657	4.34294e-05	0.00372176	19	4	Down-regulated
Sus_scrofa___PSIP1	-1.1162	6.89404	21.1622	4.47046e-05	0.00381674	19	4	Down-regulated
Sus_scrofa___TCAP	-2.6777	5.99631	20.9878	4.54058e-05	0.0038622	19	4	Down-regulated
Sus_scrofa___ASB18	-3.13921	4.14622	19.164	4.62483e-05	0.00391929	19	4	Down-regulated
Sus_scrofa___ENSSSCG00000027790	-1.6102	5.29591	20.7776	4.72448e-05	0.00398896	19	4	Down-regulated
Sus_scrofa___ADAM22	-1.94581	7.42448	20.9367	4.81253e-05	0.00403354	19	4	Down-regulated
Sus_scrofa___ENSSSCG00000001064	-2.70125	3.98013	19.0317	4.88285e-05	0.00407753	19	4	Down-regulated
Sus_scrofa___SLC9A7	-2.26427	3.94612	19.0496	4.90092e-05	0.00407775	19	4	Down-regulated
Sus_scrofa___LRRC4C	-1.35875	6.47678	20.8883	4.91895e-05	0.00407792	19	4	Down-regulated
Sus_scrofa___MGLL	-1.87944	5.44997	20.6398	4.98945e-05	0.00412134	19	4	Down-regulated
Sus_scrofa___FIG4	-1.04417	7.37219	20.813	5.00735e-05	0.00412134	19	4	Down-regulated
Sus_scrofa___ACADL	-2.41303	4.28631	19.228	5.03846e-05	0.00413208	19	4	Down-regulated
Sus_scrofa___DPP8	-0.961657	7.7931	20.7701	5.06713e-05	0.00414075	19	4	Down-regulated
Sus_scrofa___BTBD11	-1.83969	6.87634	20.7699	5.11283e-05	0.00416322	19	4	Down-regulated
Sus_scrofa___SYNPO2L	-2.55508	4.07331	18.9155	5.22473e-05	0.00423926	19	4	Down-regulated
Sus_scrofa___SMIM5	-4.1655	3.51652	22.372	5.28312e-05	0.00426972	19	4	Down-regulated
Sus_scrofa___FAM124A	-2.58088	4.28138	19.0216	5.29959e-05	0.00426972	19	4	Down-regulated
Sus_scrofa___PLS1	-2.32675	4.29174	19.0814	5.44384e-05	0.00435526	19	4	Down-regulated
Sus_scrofa___CCDC82	-1.22382	5.79912	20.5068	5.53983e-05	0.00441662	19	4	Down-regulated
Sus_scrofa___TNNC1	-2.71174	5.79203	20.1738	5.79493e-05	0.00460395	19	4	Down-regulated
Sus_scrofa___DOCK3	-2.3063	5.41184	20.0422	5.86047e-05	0.00463991	19	4	Down-regulated
Sus_scrofa___TMTC1	-1.29015	7.54857	20.2781	6.00327e-05	0.00473658	19	4	Down-regulated
Sus_scrofa___SNX24	-1.42908	6.34407	20.2597	6.08897e-05	0.004755	19	4	Down-regulated
Sus_scrofa___KCNJ3	-2.47752	6.08224	20.1727	6.1182e-05	0.00476158	19	4	Down-regulated
Sus_scrofa___SLC4A3	-2.45431	4.21551	18.6331	6.16283e-05	0.00478005	19	4	Down-regulated
Sus_scrofa___CLSTN2	-1.62324	5.20373	19.9423	6.19815e-05	0.00479121	19	4	Down-regulated
Sus_scrofa___ESRRB	-2.3164	4.52742	18.9252	6.42143e-05	0.00493049	19	4	Down-regulated
Sus_scrofa___DZIP3	-2.10925	4.45581	18.863	6.50145e-05	0.00497524	19	4	Down-regulated
Sus_scrofa___WNK2	-2.69592	5.35773	19.5171	6.61122e-05	0.00504238	19	4	Down-regulated
Sus_scrofa___BCL11A	-2.61287	3.91931	18.2015	6.8086e-05	0.00515853	19	4	Down-regulated
Sus_scrofa___ENSSSCG00000032984	-1.38516	5.91854	19.8963	6.84973e-05	0.00517256	19	4	Down-regulated
Sus_scrofa___SLCO5A1	-2.37875	4.8034	19.0244	6.89402e-05	0.00517402	19	4	Down-regulated
Sus_scrofa___ADAMTSL1	-2.19083	5.11685	19.4012	6.9217e-05	0.00517567	19	4	Down-regulated
Sus_scrofa___PRDX6	-3.70987	3.42139	21.3012	6.98759e-05	0.00519756	19	4	Down-regulated
Sus_scrofa___DNAH10	-1.63772	4.90375	19.3502	7.04028e-05	0.00519756	19	4	Down-regulated
Sus_scrofa___HIGD1B	-1.22277	8.53517	19.8004	7.04853e-05	0.00519756	19	4	Down-regulated
Sus_scrofa___SLC12A7	-1.99547	4.49011	18.7495	7.06455e-05	0.00519756	19	4	Down-regulated
Sus_scrofa___ASPN	-1.52833	6.43534	19.7194	7.33219e-05	0.00537717	19	4	Down-regulated
Sus_scrofa___EYA1	-1.70143	5.90637	19.6217	7.49852e-05	0.00548159	19	4	Down-regulated
Sus_scrofa___ISYNA1	-1.64042	6.8859	19.6177	7.58225e-05	0.00550523	19	4	Down-regulated
Sus_scrofa___ENSSSCG00000024669	-1.31969	5.95272	19.6001	7.60304e-05	0.00550523	19	4	Down-regulated
Sus_scrofa___CA14	-3.64713	3.47417	20.0926	7.67762e-05	0.00554169	19	4	Down-regulated
Sus_scrofa___RPS6KC1	-0.875233	8.42847	19.5242	7.75676e-05	0.00558121	19	4	Down-regulated
Sus_scrofa___ITGB1BP2	-2.45885	4.10176	17.9389	7.82852e-05	0.00561519	19	4	Down-regulated
Sus_scrofa___LARGE1	-1.25472	8.61263	19.451	7.95583e-05	0.00568315	19	4	Down-regulated
Sus_scrofa___EPAS1	-1.1429	8.67354	19.4407	7.98322e-05	0.00568315	19	4	Down-regulated
Sus_scrofa___PDE10A	-0.98462	11.2358	19.4076	8.06912e-05	0.00571609	19	4	Down-regulated
Sus_scrofa___ATP5ME	-2.27858	4.73424	18.5193	8.12564e-05	0.00573836	19	4	Down-regulated
Sus_scrofa___ERBB4	-2.28632	5.03937	18.78	8.40888e-05	0.00590195	19	4	Down-regulated
Sus_scrofa___CLCN4	-3.31729	3.4197	19.7005	8.5101e-05	0.00594063	19	4	Down-regulated
Sus_scrofa___ENPP2	-2.24649	4.06024	17.7317	8.58552e-05	0.00597098	19	4	Down-regulated
Sus_scrofa___PTPN4	-2.16652	6.32374	19.1939	8.75187e-05	0.00606823	19	4	Down-regulated
Sus_scrofa___MPP7	-2.09867	6.42278	19.1653	8.86857e-05	0.00613057	19	4	Down-regulated
Sus_scrofa___TPCN1	-1.44993	6.02289	19.1393	8.92797e-05	0.00615304	19	4	Down-regulated
Sus_scrofa___MSC	-1.76546	4.3741	18.0739	9.09972e-05	0.00625257	19	4	Down-regulated
Sus_scrofa___NAA60	-1.16389	6.44403	19.0649	9.20594e-05	0.00630662	19	4	Down-regulated
Sus_scrofa___MTHFR	-2.03127	4.16978	17.6738	9.32213e-05	0.00636716	19	4	Down-regulated
Sus_scrofa___PPP1R9A	-2.37122	5.29838	18.5878	9.49951e-05	0.00646856	19	4	Down-regulated
Papio_anubis_DMD	-3.2002	3.61597	18.0471	9.52715e-05	0.00646856	19	4	Down-regulated
Sus_scrofa___GPIHBP1	-3.3026	3.4776	18.7447	9.67461e-05	0.00654926	19	4	Down-regulated
Sus_scrofa___GUCY1B1	-0.985753	9.93395	18.8222	9.90699e-05	0.00664756	19	4	Down-regulated
Sus_scrofa___SCD5	-1.6748	5.4053	18.6763	9.98899e-05	0.00668298	19	4	Down-regulated
Sus_scrofa___JAM3	-1.03279	8.4184	18.7706	0.000100994	0.00673713	19	4	Down-regulated
Sus_scrofa___ASB15	-2.54166	4.92278	17.9721	0.000103733	0.00687973	19	4	Down-regulated
Sus_scrofa___CDK9	-1.26	6.6893	18.6933	0.000104768	0.00690417	19	4	Down-regulated
Sus_scrofa___TSPAN18	-1.81569	5.49727	18.5467	0.000105119	0.00690417	19	4	Down-regulated
Sus_scrofa___PDE3B	-2.11337	6.49821	18.6719	0.000105529	0.00690417	19	4	Down-regulated
Sus_scrofa___DAPL1	-4.17344	3.40825	21.2068	0.000105591	0.00690417	19	4	Down-regulated
Sus_scrofa___ULK4	-1.14745	7.28294	18.6572	0.00010561	0.00690417	19	4	Down-regulated
Sus_scrofa___SASH1	-0.889515	10.331	18.5907	0.000107505	0.00698814	19	4	Down-regulated
Sus_scrofa___RBP2	-2.35712	3.76437	17.0537	0.000109137	0.00703505	19	4	Down-regulated
Sus_scrofa___ENSSSCG00000005959	-1.61304	5.06397	18.257	0.000109457	0.00703505	19	4	Down-regulated
Sus_scrofa___ENSSSCG00000035736	-4.24381	3.29155	21.9986	0.000110067	0.00705449	19	4	Down-regulated
Sus_scrofa___ST3GAL4	-1.33108	6.5685	18.5172	0.000111563	0.00713039	19	4	Down-regulated
Sus_scrofa___EEF2K	-2.02683	4.90541	17.9691	0.000112306	0.00715786	19	4	Down-regulated
Sus_scrofa___PRKAA2	-2.31309	5.45906	18.2002	0.00011421	0.00722621	19	4	Down-regulated
Sus_scrofa___STRIP2	-2.58227	3.8838	16.8932	0.000116521	0.00734465	19	4	Down-regulated
Sus_scrofa___ENSSSCG00000013436	-2.63556	4.82761	17.4914	0.000118787	0.00746696	19	4	Down-regulated
Sus_scrofa___TPST2	-1.79137	4.5836	17.5939	0.000119375	0.00748337	19	4	Down-regulated
Sus_scrofa___SPOCK2	-2.07528	4.13789	17.0105	0.000120175	0.0075129	19	4	Down-regulated
Sus_scrofa___COL14A1	-1.54363	5.66589	18.2392	0.000120607	0.00751936	19	4	Down-regulated
Sus_scrofa___ALPK2	-2.21085	5.10165	17.7692	0.000124201	0.00768072	19	4	Down-regulated
Sus_scrofa___ZNF804B	-2.77947	5.72092	17.9801	0.000124202	0.00768072	19	4	Down-regulated
Sus_scrofa___SGCA	-2.36205	4.03347	16.7822	0.000124662	0.00768837	19	4	Down-regulated
Sus_scrofa___HUNK	-1.79278	5.49576	18.0385	0.0001267	0.0077656	19	4	Down-regulated
Sus_scrofa___ANKRD44	-0.968751	8.61983	18.1255	0.000126932	0.0077656	19	4	Down-regulated
Sus_scrofa___ADAMTSL3	-1.67514	7.58444	18.1099	0.000128176	0.00781996	19	4	Down-regulated
Sus_scrofa___SLC19A1	-1.59548	5.59633	18.0407	0.000128504	0.00781996	19	4	Down-regulated
Sus_scrofa___LIPC	-1.57628	4.88397	17.6713	0.000129924	0.00786082	19	4	Down-regulated
Sus_scrofa___LRFN2	-2.42244	4.06402	16.681	0.000130512	0.00786082	19	4	Down-regulated
Sus_scrofa___SYT6	-1.72202	4.49739	17.214	0.00013334	0.0079605	19	4	Down-regulated
Sus_scrofa___ELOVL6	-1.32086	8.90735	17.9821	0.000133589	0.0079605	19	4	Down-regulated
Sus_scrofa___TRPV2	-1.3321	6.60727	17.9832	0.000134869	0.00801544	19	4	Down-regulated
Sus_scrofa___SDCCAG8	-1.17624	6.56235	17.9489	0.000136543	0.00808391	19	4	Down-regulated
Sus_scrofa___PTPRD	-1.88177	5.235	17.6964	0.000136828	0.00808391	19	4	Down-regulated
Sus_scrofa___IFT46	-1.32523	5.22814	17.7723	0.000137081	0.00808391	19	4	Down-regulated
Sus_scrofa___CCK	-3.03216	3.70405	16.733	0.000139634	0.00821328	19	4	Down-regulated
Sus_scrofa___ABLIM1	-1.80952	9.76999	17.8423	0.000140407	0.00823757	19	4	Down-regulated
Sus_scrofa___ENSSSCG00000000405	-1.9505	4.69461	17.1073	0.000144147	0.00834993	19	4	Down-regulated
Sus_scrofa___OLFM1	-4.08325	3.26421	20.7807	0.000146874	0.00848643	19	4	Down-regulated
Sus_scrofa___LUC7L3	-0.884418	8.98945	17.6368	0.000151216	0.00871532	19	4	Down-regulated
Sus_scrofa___GABRB1	-2.259	4.70338	16.9335	0.000152317	0.00874547	19	4	Down-regulated
Sus_scrofa___RYR2	-2.07815	10.6293	17.6124	0.000152504	0.00874547	19	4	Down-regulated
Sus_scrofa___SNRK	-1.20014	8.08083	17.5573	0.000155849	0.00889275	19	4	Down-regulated
Sus_scrofa___STXBP6	-2.08541	5.31375	17.3118	0.000157243	0.00894995	19	4	Down-regulated
Sus_scrofa___DISC1	-1.02337	7.6426	17.5146	0.000158483	0.00899816	19	4	Down-regulated
Sus_scrofa___ENSSSCG00000032896	-2.11803	3.86012	16.1089	0.000162502	0.00917372	19	4	Down-regulated
Sus_scrofa___ENSSSCG00000049691	-0.925426	9.77001	17.3305	0.000168897	0.00949517	19	4	Down-regulated
Sus_scrofa___LNPEP	-1.55653	5.42636	17.2295	0.000169729	0.00951853	19	4	Down-regulated
Sus_scrofa___CYHR1	-1.35771	5.33236	17.2072	0.000171048	0.00956905	19	4	Down-regulated
Sus_scrofa___EPHX1	-2.17242	4.21645	16.129	0.000173368	0.00966531	19	4	Down-regulated
Sus_scrofa___RAB3IL1	-2.64715	3.6928	16.0436	0.000173655	0.00966531	19	4	Down-regulated
Sus_scrofa___BTBD8	-2.01192	4.70644	16.6073	0.000174035	0.00966531	19	4	Down-regulated
Sus_scrofa___ARHGAP29	-0.901783	9.02837	17.1945	0.000177499	0.00981003	19	4	Down-regulated
Sus_scrofa___ENSSSCG00000046937	-1.79885	4.86298	16.7596	0.000179233	0.00982791	19	4	Down-regulated
Sus_scrofa___COX5B	-2.69247	5.01306	16.5636	0.000179378	0.00982791	19	4	Down-regulated
Sus_scrofa___RGS12	-1.1015	6.64019	17.1878	0.00017954	0.00982791	19	4	Down-regulated
Sus_scrofa___ENSSSCG00000038455	-2.40182	6.09424	17.0903	0.000183047	0.00997212	19	4	Down-regulated
Sus_scrofa___BRD3	-1.09882	7.19559	17.0664	0.000186954	0.0101299	19	4	Down-regulated
Sus_scrofa___UNC13B	-2.25426	5.23423	16.7637	0.00018717	0.0101299	19	4	Down-regulated
Sus_scrofa___ASB2	-2.11953	4.91494	16.5695	0.000187445	0.0101299	19	4	Down-regulated
Sus_scrofa___CKMT2	-2.50249	4.52057	16.1092	0.000187714	0.0101299	19	4	Down-regulated
Sus_scrofa___NQO2	-1.40885	5.27021	16.909	0.000188404	0.0101353	19	4	Down-regulated
Sus_scrofa___RHOH	-3.04547	3.46094	16.5831	0.0001887	0.0101353	19	4	Down-regulated
Sus_scrofa___DTX4	-1.94118	6.36232	17.0382	0.0001895	0.0101545	19	4	Down-regulated
Sus_scrofa___GP91-PHOX	-3.11264	3.52662	16.3247	0.000191332	0.0102287	19	4	Down-regulated
Sus_scrofa___CSF1R	-2.27881	3.86349	15.6699	0.000194542	0.010376	19	4	Down-regulated
Sus_scrofa___PTGFRN	-1.74938	4.9815	16.6187	0.000195024	0.0103775	19	4	Down-regulated
Sus_scrofa___ENSSSCG00000033497	-0.929254	8.96216	16.9049	0.000197303	0.0104502	19	4	Down-regulated
Sus_scrofa___GLUL	-1.95248	5.2347	16.6507	0.000200409	0.0105658	19	4	Down-regulated
Sus_scrofa___SCARB1	-1.52304	6.87539	16.8728	0.000201239	0.0105776	19	4	Down-regulated
Sus_scrofa___RASGRP3	-1.76558	4.36749	16.0313	0.000201556	0.0105776	19	4	Down-regulated
Sus_scrofa___CADM3	-1.98396	4.52355	16.1323	0.00020275	0.0106159	19	4	Down-regulated
Sus_scrofa___EDAR	-3.37527	3.34525	17.8099	0.00020484	0.0106802	19	4	Down-regulated
Sus_scrofa___CDH18	-2.59483	3.7921	15.5744	0.000204913	0.0106802	19	4	Down-regulated
Sus_scrofa___NDST3	-2.45737	3.7677	15.5488	0.000205736	0.0106988	19	4	Down-regulated
Sus_scrofa___SPRY1	-0.839034	9.86234	16.7613	0.000207905	0.0107626	19	4	Down-regulated
Sus_scrofa___ENSSSCG00000042498	-1.85709	4.67365	16.1502	0.000213769	0.0109959	19	4	Down-regulated
Sus_scrofa___PLEKHA7	-1.76984	4.52109	16.0082	0.000213854	0.0109959	19	4	Down-regulated
Sus_scrofa___ENSSSCG00000000359	-2.05052	4.79847	16.1171	0.000216028	0.0110828	19	4	Down-regulated
Sus_scrofa___GLI2	-0.930829	7.84781	16.6477	0.000217218	0.0111001	19	4	Down-regulated
Sus_scrofa___DCP1B	-1.99339	5.1185	16.3575	0.000217334	0.0111001	19	4	Down-regulated
Sus_scrofa___TANC2	-1.5173	5.45725	16.5655	0.00021813	0.0111061	19	4	Down-regulated
Sus_scrofa___PTPRF	-1.14296	6.39455	16.6538	0.000218423	0.0111061	19	4	Down-regulated
Sus_scrofa___LGMN	-2.04997	4.06257	15.516	0.000218988	0.0111101	19	4	Down-regulated
Sus_scrofa___PDZRN3	-1.22465	8.00647	16.556	0.000224634	0.0113576	19	4	Down-regulated
Sus_scrofa___TRPM3	-1.8853	5.32829	16.3999	0.00022486	0.0113576	19	4	Down-regulated
Sus_scrofa___PFKM	-2.38312	3.78309	15.2924	0.000228399	0.0114583	19	4	Down-regulated
Sus_scrofa___RADIL	-1.25891	6.81926	16.5021	0.000230548	0.0115178	19	4	Down-regulated
Sus_scrofa___AKNA	-1.17782	5.90989	16.4752	0.000232324	0.0115561	19	4	Down-regulated
Sus_scrofa___ABI2	-0.849306	8.19755	16.4247	0.000235631	0.0116698	19	4	Down-regulated
Sus_scrofa___SLCO1C1	-2.69198	3.66305	15.2792	0.000244638	0.0120637	19	4	Down-regulated
Sus_scrofa___KCNQ1	-2.19203	5.08514	15.9671	0.000245171	0.012064	19	4	Down-regulated
Sus_scrofa___ACTC1	-2.83919	4.69525	15.4202	0.000249294	0.0122269	19	4	Down-regulated
Sus_scrofa___SLC9A3R2	-1.60818	5.96198	16.2629	0.000250485	0.0122464	19	4	Down-regulated
Sus_scrofa___DEUP1	-1.39172	6.35055	16.2416	0.000254235	0.0124033	19	4	Down-regulated
Sus_scrofa___FNBP1	-0.919409	8.5359	16.2115	0.000254882	0.0124084	19	4	Down-regulated
Sus_scrofa___FHL2	-2.15374	7.97839	16.2063	0.000256022	0.0124374	19	4	Down-regulated
Sus_scrofa___CYFIP2	-2.36756	4.09368	15.0871	0.000257611	0.0124881	19	4	Down-regulated
Sus_scrofa___RCAN2	-1.58933	10.0274	16.1633	0.000259333	0.012545	19	4	Down-regulated
Sus_scrofa___TBC1D2B	-1.42243	5.40899	16.0881	0.000260076	0.0125544	19	4	Down-regulated
Sus_scrofa___GRK3	-1.22358	6.91809	16.1511	0.000262335	0.0126103	19	4	Down-regulated
Sus_scrofa___ENSSSCG00000039476	-1.14441	7.28858	16.1325	0.000263511	0.0126402	19	4	Down-regulated
Sus_scrofa___PPFIA4	-2.29043	4.42227	15.2366	0.000264843	0.0126775	19	4	Down-regulated
Sus_scrofa___CEP131	-2.33163	3.91492	14.9116	0.000269577	0.0128772	19	4	Down-regulated
Sus_scrofa___ZDHHC14	-1.75968	5.62735	16.0042	0.000271664	0.0129499	19	4	Down-regulated
Sus_scrofa___MIGA2	-2.07839	5.72419	15.9543	0.000274722	0.0129928	19	4	Down-regulated
Sus_scrofa___ENSSSCG00000039339	-2.39158	3.6814	14.9068	0.000274836	0.0129928	19	4	Down-regulated
Sus_scrofa___SP7	-2.73348	3.67665	14.9764	0.000277809	0.0131063	19	4	Down-regulated
Sus_scrofa___ENSSSCG00000007944	-1.24862	6.3328	15.9585	0.000282474	0.0132727	19	4	Down-regulated
Sus_scrofa___EFHC1	-1.32336	5.72942	15.9303	0.000282497	0.0132727	19	4	Down-regulated
Sus_scrofa___HPSE2	-1.76058	6.0376	15.9238	0.000284458	0.0133234	19	4	Down-regulated
Sus_scrofa___SOX13	-1.20123	8.016	15.917	0.000284739	0.0133234	19	4	Down-regulated
Sus_scrofa___FRMPD4	-1.87132	4.73562	15.3551	0.000296043	0.0138035	19	4	Down-regulated
Sus_scrofa___GRAMD1C	-2.46689	4.3706	14.8619	0.000297604	0.0138404	19	4	Down-regulated
Sus_scrofa___PDE6A	-1.67688	6.38251	15.7727	0.000302654	0.0140183	19	4	Down-regulated
Sus_scrofa___ARHGAP21	-0.819434	8.42819	15.7297	0.000305141	0.0140939	19	4	Down-regulated
Sus_scrofa___GADD45G	-2.2087	4.6587	15.1466	0.000305586	0.0140939	19	4	Down-regulated
Sus_scrofa___RIN3	-1.48055	5.36165	15.6344	0.000306957	0.0141034	19	4	Down-regulated
Sus_scrofa___DOCK9	-0.793899	8.8832	15.683	0.000310416	0.0142337	19	4	Down-regulated
Sus_scrofa___HRH1	-1.84285	4.98152	15.3916	0.00031126	0.0142439	19	4	Down-regulated
Sus_scrofa___SKAP1	-1.99964	4.39376	14.8672	0.000314546	0.0143312	19	4	Down-regulated
Sus_scrofa___APOBEC2	-2.27238	4.45655	14.8422	0.000316652	0.0143756	19	4	Down-regulated
Sus_scrofa___ENPEP	-1.24143	8.78218	15.611	0.000318986	0.0144529	19	4	Down-regulated
Sus_scrofa___THRB	-1.62425	7.46683	15.604	0.00032106	0.0145181	19	4	Down-regulated
Sus_scrofa___TNRC6B	-0.753112	9.20762	15.5711	0.000323709	0.0145803	19	4	Down-regulated
Sus_scrofa___SLC24A3	-1.35446	7.07312	15.5705	0.000325647	0.0146388	19	4	Down-regulated
Sus_scrofa___SCARF1	-2.28379	3.99445	14.4594	0.000330983	0.0148494	19	4	Down-regulated
Sus_scrofa___MOCOS	-1.63183	5.74534	15.4509	0.000336627	0.0150437	19	4	Down-regulated
Sus_scrofa___PROX1	-2.27662	4.08257	14.4313	0.000340005	0.0151355	19	4	Down-regulated
Sus_scrofa___CMTM8	-1.82501	4.79498	15.0106	0.000346584	0.0153984	19	4	Down-regulated
Sus_scrofa___SLC25A4	-2.12354	5.56928	15.2855	0.000347855	0.0154249	19	4	Down-regulated
Sus_scrofa___FAM162B	-1.19508	7.17719	15.3581	0.000352512	0.0156012	19	4	Down-regulated
Sus_scrofa___NGF	-1.24544	8.49519	15.3236	0.00035563	0.0157088	19	4	Down-regulated
Sus_scrofa___ENSSSCG00000031640	-2.56405	3.49132	14.5443	0.000361036	0.0158863	19	4	Down-regulated
Sus_scrofa___PPP1R12B	-1.50395	7.66253	15.2575	0.000365488	0.015997	19	4	Down-regulated
Sus_scrofa___EZH1	-1.01464	6.19335	15.2711	0.000365649	0.015997	19	4	Down-regulated
Sus_scrofa___ENSSSCG00000009125	-1.46798	7.4034	15.2507	0.000366831	0.0160152	19	4	Down-regulated
Sus_scrofa___NAAA	-2.84859	3.47586	14.8132	0.000367466	0.0160152	19	4	Down-regulated
Sus_scrofa___SEMA3G	-2.71403	3.63358	14.3676	0.000369156	0.0160583	19	4	Down-regulated
Sus_scrofa___SYK	-2.07849	3.77451	14.1273	0.000375267	0.0162748	19	4	Down-regulated
Sus_scrofa___PTPN18	-2.08236	3.78017	14.1161	0.000376969	0.0162748	19	4	Down-regulated
Sus_scrofa___ND2	-1.97775	5.81504	15.1412	0.000376994	0.0162748	19	4	Down-regulated
Sus_scrofa___SVIL	-1.3544	8.01108	15.1674	0.000377689	0.0162748	19	4	Down-regulated
Sus_scrofa___TMPO	-1.62349	4.41562	14.5548	0.00037998	0.01631	19	4	Down-regulated
Sus_scrofa___ND6	-2.00896	4.60792	14.5951	0.00038032	0.01631	19	4	Down-regulated
Sus_scrofa___MLPH	-2.36427	4.37822	14.322	0.000380646	0.01631	19	4	Down-regulated
Sus_scrofa___ATF6B	-1.21398	5.23487	15.0474	0.000381838	0.0163305	19	4	Down-regulated
Sus_scrofa___ANTXR2	-0.991919	7.57609	15.0934	0.000388855	0.0165687	19	4	Down-regulated
Sus_scrofa___COL6A6	-2.05921	4.41031	14.3678	0.000390879	0.016624	19	4	Down-regulated
Sus_scrofa___STRADB	-1.95312	5.44558	14.9605	0.0003918	0.0166322	19	4	Down-regulated
Sus_scrofa___EDIL3	-2.34554	4.19687	14.141	0.000393785	0.0166678	19	4	Down-regulated
Sus_scrofa___MANBA	-2.26345	4.05095	14.0613	0.000394764	0.0166678	19	4	Down-regulated
Sus_scrofa___ARHGEF6	-1.34756	6.66066	15.0529	0.000396937	0.0167262	19	4	Down-regulated
Sus_scrofa___ST8SIA1	-1.05804	7.55221	15.0312	0.000398222	0.0167495	19	4	Down-regulated
Sus_scrofa___VSIG4	-3.21597	3.36981	15.311	0.000399231	0.0167611	19	4	Down-regulated
Sus_scrofa___SEPTIN7	-0.734966	9.40321	15.009	0.000400512	0.0167841	19	4	Down-regulated
Sus_scrofa___CACNB2	-0.878016	11.7392	14.9936	0.000402814	0.0168497	19	4	Down-regulated
Sus_scrofa___MME	-2.53256	3.52924	14.1715	0.000405442	0.0169287	19	4	Down-regulated
Sus_scrofa___ANTXR1	-0.988946	9.18929	14.9499	0.000409677	0.0170744	19	4	Down-regulated
Sus_scrofa___CYP7B1	-0.981475	8.8647	14.9118	0.000415748	0.0172596	19	4	Down-regulated
Sus_scrofa___LAMA4	-0.834541	9.33302	14.9072	0.000416385	0.0172596	19	4	Down-regulated
Sus_scrofa___MPPE1	-1.73772	4.5492	14.3978	0.00041737	0.0172692	19	4	Down-regulated
Sus_scrofa___SLC16A7	-1.95199	6.27555	14.9057	0.000418913	0.0173017	19	4	Down-regulated
Sus_scrofa___PROM1	-1.4349	6.68506	14.8809	0.000423772	0.017462	19	4	Down-regulated
Sus_scrofa___FADS2	-1.31306	6.01649	14.8734	0.00042432	0.017462	19	4	Down-regulated
Sus_scrofa___SMARCD1	-1.31282	5.45075	14.8041	0.000425809	0.0174918	19	4	Down-regulated
Sus_scrofa___ENSSSCG00000017868	-2.62176	3.64174	13.9604	0.000427468	0.0175285	19	4	Down-regulated
Sus_scrofa___RUBCNL	-1.25243	5.86338	14.8317	0.000429867	0.0175953	19	4	Down-regulated
Sus_scrofa___NRG4	-2.20968	4.0022	13.8531	0.000432138	0.0176567	19	4	Down-regulated
Sus_scrofa___CEP170	-0.763504	7.88674	14.7743	0.000438734	0.0178624	19	4	Down-regulated
Sus_scrofa___SLC35F3	-2.13686	3.74998	13.7657	0.000439622	0.0178668	19	4	Down-regulated
Sus_scrofa___GPR137C	-1.95497	4.83592	14.395	0.000440692	0.0178785	19	4	Down-regulated
Sus_scrofa___PKP2	-1.9957	5.47087	14.6303	0.000445804	0.0180044	19	4	Down-regulated
Sus_scrofa___GABBR1	-0.975847	6.73056	14.7327	0.000448127	0.0180521	19	4	Down-regulated
Sus_scrofa___TRIM36	-1.97501	4.10631	13.8204	0.000453569	0.0182072	19	4	Down-regulated
Sus_scrofa___GPR176	-1.44171	6.2482	14.6932	0.000455311	0.0182451	19	4	Down-regulated
Sus_scrofa___ENSSSCG00000008576	-0.916173	6.51447	14.6881	0.000456307	0.0182531	19	4	Down-regulated
Sus_scrofa___PRKCG	-2.54622	3.50533	13.9566	0.000458851	0.0183228	19	4	Down-regulated
Sus_scrofa___SUSD4	-1.0905	8.12713	14.6265	0.000464171	0.0184708	19	4	Down-regulated
Sus_scrofa___ADAM11	-3.1073	3.54101	14.0902	0.000466015	0.0184799	19	4	Down-regulated
Sus_scrofa___ATP13A5	-3.61238	3.39517	15.4334	0.000467173	0.0184938	19	4	Down-regulated
Sus_scrofa___MAP7	-2.57243	4.43622	13.8069	0.000468107	0.0184987	19	4	Down-regulated
Sus_scrofa___ZDHHC19	-3.69485	3.20727	16.4625	0.000471472	0.0185996	19	4	Down-regulated
Sus_scrofa___ATP1A2	-1.56019	7.25699	14.5705	0.00047597	0.0187125	19	4	Down-regulated
Sus_scrofa___TRIR	-1.46801	4.83127	14.2804	0.000477497	0.0187403	19	4	Down-regulated
Sus_scrofa___FAM160A1	-2.03302	5.10409	14.2837	0.000484639	0.0189232	19	4	Down-regulated
Sus_scrofa___UQCR10	-2.92067	3.72464	13.6435	0.000490634	0.0191095	19	4	Down-regulated
Sus_scrofa___TRIM55	-2.16251	5.50706	14.3634	0.000491871	0.0191095	19	4	Down-regulated
Sus_scrofa___KCNQ3	-2.01973	5.6503	14.4294	0.000492088	0.0191095	19	4	Down-regulated
Sus_scrofa___NCOA2	-0.748594	8.93786	14.4618	0.000494113	0.0191095	19	4	Down-regulated
Sus_scrofa___EGFLAM	-1.0758	11.0053	14.4597	0.000494363	0.0191095	19	4	Down-regulated
Sus_scrofa___DDAH2	-1.31425	4.94112	14.2578	0.000494743	0.0191095	19	4	Down-regulated
Sus_scrofa___U2SURP	-0.759666	8.0624	14.4581	0.000495255	0.0191095	19	4	Down-regulated
Sus_scrofa___OPLAH	-3.19769	3.31653	15.1636	0.000497001	0.0191195	19	4	Down-regulated
Sus_scrofa___CELSR2	-1.31365	5.28605	14.3702	0.000497187	0.0191195	19	4	Down-regulated
Sus_scrofa___ENSSSCG00000036363	-1.36012	5.85564	14.4441	0.000498488	0.0191374	19	4	Down-regulated
Sus_scrofa___ADSS1	-2.45692	4.0691	13.487	0.00050549	0.0193533	19	4	Down-regulated
Sus_scrofa___LRFN5	-1.49076	6.60795	14.4202	0.000505802	0.0193533	19	4	Down-regulated
Sus_scrofa___MCC	-1.03856	7.18037	14.4019	0.000507706	0.0193637	19	4	Down-regulated
Sus_scrofa___ZCCHC14	-0.909766	8.47742	14.39	0.000508184	0.0193637	19	4	Down-regulated
Sus_scrofa___KSR1	-0.940069	9.41651	14.3839	0.000509128	0.0193637	19	4	Down-regulated
Sus_scrofa___ND4	-1.90472	5.7276	14.3307	0.000513304	0.0194775	19	4	Down-regulated
Sus_scrofa___BVES	-2.26844	4.25618	13.5282	0.000522897	0.0197759	19	4	Down-regulated
Sus_scrofa___MAVS	-1.66468	4.82793	13.9693	0.000532993	0.0200698	19	4	Down-regulated
Sus_scrofa___ENSSSCG00000013100	-2.58062	3.47111	13.7143	0.000533142	0.0200698	19	4	Down-regulated
Sus_scrofa___AKAP1	-2.41886	3.72168	13.3499	0.0005333	0.0200698	19	4	Down-regulated
Sus_scrofa___TRIM63	-2.3419	4.49998	13.5922	0.000535801	0.0201308	19	4	Down-regulated
Sus_scrofa___PPP1R3A	-2.45389	3.99279	13.3335	0.000537419	0.0201585	19	4	Down-regulated
Sus_scrofa___ASAH1	-2.02296	3.92625	13.3282	0.000539705	0.0202111	19	4	Down-regulated
Sus_scrofa___IVNS1ABP	-1.91107	6.10216	14.1883	0.000550643	0.0205863	19	4	Down-regulated
Sus_scrofa___ENSSSCG00000029709	-1.82942	5.47455	14.1066	0.000551863	0.0205863	19	4	Down-regulated
Sus_scrofa___XRRA1	-1.31059	5.07309	14.0372	0.00055244	0.0205863	19	4	Down-regulated
Sus_scrofa___TMSB4X	-1.07772	6.83175	14.1601	0.000558578	0.0207481	19	4	Down-regulated
Sus_scrofa___SH2D3C	-1.34728	5.22413	14.0283	0.00056548	0.0209225	19	4	Down-regulated
Sus_scrofa___S100A1	-2.79833	3.5827	13.4559	0.000566015	0.0209225	19	4	Down-regulated
Sus_scrofa___ZNF205	-1.51516	4.56421	13.6735	0.000574227	0.0211576	19	4	Down-regulated
Sus_scrofa___PTGER3	-1.89911	6.37047	14.0854	0.000575348	0.0211648	19	4	Down-regulated
Sus_scrofa___TBC1D1	-0.840811	9.56901	14.0404	0.000581696	0.0213451	19	4	Down-regulated
Sus_scrofa___ATP1A1	-1.66102	6.33088	14.0561	0.000582113	0.0213451	19	4	Down-regulated
Sus_scrofa___ENSSSCG00000040992	-3.44922	3.36059	14.7584	0.000585079	0.0213859	19	4	Down-regulated
Sus_scrofa___MPP2	-1.88968	3.91223	13.1227	0.000592612	0.0215992	19	4	Down-regulated
Sus_scrofa___TRAF3IP3	-2.25166	3.71197	13.095	0.00059282	0.0215992	19	4	Down-regulated
Sus_scrofa___GALNT16	-1.40862	7.9687	13.9869	0.000594873	0.0216396	19	4	Down-regulated
Sus_scrofa___PLEKHM3	-1.823	5.31248	13.8549	0.000597202	0.0216617	19	4	Down-regulated
Sus_scrofa___GRAMD4	-1.73562	4.66688	13.5843	0.000597982	0.0216617	19	4	Down-regulated
Sus_scrofa___FAP	-1.07631	7.63353	13.9739	0.000598322	0.0216617	19	4	Down-regulated
Sus_scrofa___UQCRQ	-2.30141	4.17118	13.1283	0.000604548	0.0218181	19	4	Down-regulated
Sus_scrofa___SEMA5A	-1.19221	10.2893	13.9017	0.000614	0.0220746	19	4	Down-regulated
Sus_scrofa___GGA2	-1.87272	4.69578	13.4802	0.000621317	0.0222478	19	4	Down-regulated
Sus_scrofa___RBM25	-0.782584	8.15095	13.8259	0.000633055	0.0226327	19	4	Down-regulated
Sus_scrofa___NOTCH3	-1.06419	8.73335	13.7677	0.000647305	0.0229628	19	4	Down-regulated
Sus_scrofa___ENSSSCG00000007524	-1.64027	5.3922	13.6783	0.000650992	0.0230578	19	4	Down-regulated
Papio_anubis_PNN	-1.62018	4.291	13.1327	0.000659683	0.0232935	19	4	Down-regulated
Sus_scrofa___CLIC5	-1.58874	6.70112	13.7189	0.000664147	0.0233805	19	4	Down-regulated
Sus_scrofa___RHEX	-3.33893	3.32939	14.3651	0.000670008	0.0235319	19	4	Down-regulated
Sus_scrofa___IQGAP2	-1.51665	4.93517	13.4871	0.000670546	0.0235319	19	4	Down-regulated
Sus_scrofa___GNPDA1	-1.56448	4.27789	13.0229	0.00068922	0.0239793	19	4	Down-regulated
Sus_scrofa___TSPAN11	-2.29755	3.44461	12.9933	0.000689584	0.0239793	19	4	Down-regulated
Sus_scrofa___EEPD1	-1.67392	4.93264	13.3774	0.000694682	0.0241199	19	4	Down-regulated
Sus_scrofa___ENSSSCG00000031075	-1.72668	5.51301	13.4923	0.000705249	0.0243758	19	4	Down-regulated
Sus_scrofa___ABCB5	-3.71816	3.31492	14.8232	0.000707193	0.0244062	19	4	Down-regulated
Sus_scrofa___ARHGAP10	-0.835996	11.1906	13.5352	0.000708941	0.0244296	19	4	Down-regulated
Sus_scrofa___SATB2	-1.29023	5.83043	13.5353	0.000710338	0.0244393	19	4	Down-regulated
Sus_scrofa___HLF	-1.7606	4.67155	13.1369	0.000711358	0.0244393	19	4	Down-regulated
Sus_scrofa___ADAMTSL5	-2.6467	3.61515	12.8149	0.000717624	0.0246078	19	4	Down-regulated
Sus_scrofa___DSP	-2.09585	4.35558	12.8922	0.000718413	0.0246078	19	4	Down-regulated
Sus_scrofa___JAM2	-1.70228	4.36795	12.9484	0.000726821	0.024846	19	4	Down-regulated
Sus_scrofa___GRIK4	-1.64333	8.54972	13.4715	0.000727538	0.024846	19	4	Down-regulated
Sus_scrofa___SUN1	-0.87308	7.4931	13.4714	0.000728806	0.0248522	19	4	Down-regulated
Sus_scrofa___KCNJ2	-2.6658	3.58636	12.7736	0.000734209	0.0249992	19	4	Down-regulated
Sus_scrofa___HBB	-2.00981	3.84775	12.593	0.000740058	0.0251493	19	4	Down-regulated
Sus_scrofa___RB1CC1	-0.9165	7.36741	13.4313	0.000740817	0.0251493	19	4	Down-regulated
Sus_scrofa___RNF150	-1.77639	6.40353	13.4345	0.000742615	0.0251674	19	4	Down-regulated
Sus_scrofa___SLC16A12	-1.17704	8.33077	13.4154	0.000743883	0.0251674	19	4	Down-regulated
Sus_scrofa___CROCC	-1.36945	5.23048	13.3258	0.000745749	0.0251674	19	4	Down-regulated
Sus_scrofa___FBXO40	-2.23531	4.60487	12.8808	0.000750791	0.0253002	19	4	Down-regulated
Sus_scrofa___SF3B1	-0.818406	9.21345	13.371	0.000756557	0.0253452	19	4	Down-regulated
Sus_scrofa___FSD2	-2.3441	3.95641	12.5311	0.00076126	0.0254655	19	4	Down-regulated
Sus_scrofa___ENSSSCG00000001456	-1.62199	4.36788	12.798	0.000773122	0.0257285	19	4	Down-regulated
Sus_scrofa___ENSSSCG00000037775	-2.4712	3.56612	12.6369	0.000775373	0.0257285	19	4	Down-regulated
[truncated: 165 more rows]

## Sheet: Neuronal cells
Gene	logFC	logCPM	F	PValue	FDR	Observations_Transplanted	Observations_Control	level
[truncated: 81 more rows]

[truncated: 2 more sheets: Resident Immune, Vascular EC]
