# Supplementary material for: Integrated Molecular Profiling of Preclinical and Clinical Cardiac Xenotransplants
Source: Research Square preprint supplement (doi:10.21203/rs.3.rs-8406985/v1), 2026-02-04
Supplement: Supplementary file 22 [file a87e2665b037e39542bed018.xlsx]

## Sheet: Arterial_EC
Gene	scores	log2FC	pvals	FDR
Sus_scrofa___KCNN2	10.9615	2.28834	5.85199e-28	2.13861e-23
Sus_scrofa___SOX5	10.7539	2.39368	5.68349e-27	1.03852e-22
Sus_scrofa___NEBL	10.2263	2.85383	1.51141e-24	1.84115e-20
Sus_scrofa___CPXM2	9.71107	3.07285	2.70492e-22	2.47129e-18
Sus_scrofa___LDB2	9.35026	1.43864	8.74296e-21	6.39023e-17
Sus_scrofa___SMAD6	8.96363	2.2234	3.1417e-19	1.64019e-15
Sus_scrofa___TSC22D1	8.74665	1.38181	2.19788e-18	1.00402e-14
Sus_scrofa___EPAS1	8.72548	1.08936	2.65054e-18	1.07627e-14
Sus_scrofa___ENSSSCG00000003909	8.38443	1.79736	5.09712e-17	1.86274e-13
Sus_scrofa___ENSSSCG00000016548	8.23377	1.17872	1.81409e-16	6.0269e-13
Sus_scrofa___PLSCR4	7.8136	2.25291	5.55794e-15	1.69262e-11
Sus_scrofa___RASGRF2	7.74044	1.36087	9.90764e-15	2.78519e-11
Sus_scrofa___LNX1	7.49263	2.08134	6.75079e-14	1.7622e-10
Sus_scrofa___GULP1	7.36531	1.44245	1.76742e-13	4.0369e-10
Sus_scrofa___ARL15	7.32775	0.994475	2.34051e-13	5.03141e-10
Sus_scrofa___THSD7A	7.07853	2.90264	1.45692e-12	2.80226e-09
Sus_scrofa___FRMD3	6.9155	1.2438	4.6623e-12	8.51919e-09
Sus_scrofa___CD36	6.87012	1.36033	6.41461e-12	1.11629e-08
Sus_scrofa___FABP4	6.7682	1.38008	1.30394e-11	2.07185e-08
Sus_scrofa___SYNE2	6.5853	0.912544	4.5396e-11	6.38076e-08
Sus_scrofa___NCOA3	6.47708	0.813713	9.35125e-11	1.26571e-07
Sus_scrofa___ADGRF4	6.3287	1.53181	2.47231e-10	3.17525e-07
Sus_scrofa___ENSSSCG00000003839	6.32577	1.05547	2.5197e-10	3.17525e-07
Sus_scrofa___FLT1	6.28442	0.858179	3.29087e-10	4.00883e-07
Sus_scrofa___PLPP1	6.11498	1.20336	9.65702e-10	1.00833e-06
Sus_scrofa___BMPR2	6.03997	0.770457	1.54139e-09	1.56473e-06
Sus_scrofa___SIPA1L2	5.98288	0.992118	2.19227e-09	2.16532e-06
Sus_scrofa___WFDC1	5.93067	1.47363	3.01703e-09	2.90151e-06
Sus_scrofa___ALCAM	5.77133	1.12839	7.86504e-09	7.1857e-06
Sus_scrofa___EFNB2	5.72574	1.34779	1.02986e-08	8.961e-06
Sus_scrofa___FCHO2	5.65355	0.751881	1.57163e-08	1.33571e-05
Sus_scrofa___CDK14	5.63966	1.57985	1.70386e-08	1.41517e-05
Sus_scrofa___SGK1	5.62674	1.71577	1.83643e-08	1.49139e-05
Sus_scrofa___ENSSSCG00000012362	5.60069	0.83249	2.13497e-08	1.66005e-05
Sus_scrofa___PUS7	5.54338	1.41702	2.96686e-08	2.25883e-05
Sus_scrofa___GHSR	5.53198	1.16127	3.16629e-08	2.36147e-05
Sus_scrofa___SLCO2A1	5.50507	1.03761	3.69032e-08	2.69725e-05
Sus_scrofa___SMAD7	5.49432	2.57433	3.92221e-08	2.81053e-05
Sus_scrofa___UTRN	5.48857	0.530247	4.05209e-08	2.84776e-05
Sus_scrofa___ENSSSCG00000048263	5.48412	1.0345	4.15542e-08	2.86528e-05
Sus_scrofa___HTRA1	5.47923	1.22231	4.27177e-08	2.89096e-05
Sus_scrofa___GPIHBP1	5.38556	1.53359	7.22205e-08	4.63035e-05
Sus_scrofa___RUNX1T1	5.25541	0.909898	1.47693e-07	9.14823e-05
Sus_scrofa___RAPGEF4	5.23457	0.820612	1.65368e-07	0.000100723
Sus_scrofa___LIMA1	5.20852	1.26829	1.90352e-07	0.00011404
Sus_scrofa___MPPED2	5.18431	2.43965	2.1681e-07	0.000127795
Sus_scrofa___ID3	5.16782	1.86224	2.36845e-07	0.000137389
Sus_scrofa___FGF2	5.10519	1.42777	3.30469e-07	0.000185203
Sus_scrofa___SLC9A3R2	5.10291	1.25666	3.34476e-07	0.000185203
Sus_scrofa___RAPGEF1	5.00598	0.776251	5.55796e-07	0.000290165
Sus_scrofa___CYYR1	4.91187	0.72016	9.02128e-07	0.000457893
Sus_scrofa___MYRIP	4.84446	1.49397	1.26955e-06	0.000626971
Sus_scrofa___CLIC5	4.82308	0.678568	1.41359e-06	0.000670907
Sus_scrofa___DENND1A	4.78096	0.696526	1.74458e-06	0.000817378
Sus_scrofa___TSPAN13	4.7713	0.80718	1.83038e-06	0.000846727
Sus_scrofa___ARHGEF12	4.76088	0.667085	1.92749e-06	0.0008805
Sus_scrofa___SRPK2	4.70704	0.809803	2.51335e-06	0.00112013
Sus_scrofa___TLN2	4.65581	1.33627	3.22708e-06	0.00142089
Sus_scrofa___MYCBP2	4.63616	0.702434	3.54934e-06	0.00152601
Sus_scrofa___DDX5	4.63182	0.767996	3.62461e-06	0.00154025
Sus_scrofa___ENSSSCG00000000530	4.6226	1.73728	3.78967e-06	0.00159188
Sus_scrofa___CCDC68	4.60577	1.22757	4.10939e-06	0.00168739
Sus_scrofa___PREX2	4.54086	0.570524	5.60247e-06	0.00224992
Sus_scrofa___CDC14A	4.50841	1.17701	6.53162e-06	0.00259454
Sus_scrofa___SAMD8	4.50027	1.04922	6.78684e-06	0.00266694
Sus_scrofa___ENG	4.49278	1.02511	7.03005e-06	0.00273312
Sus_scrofa___PDE4D	4.48561	0.696133	7.27047e-06	0.00279684
Sus_scrofa___ENSSSCG00000015814	4.4727	0.734563	7.72396e-06	0.00294034
Sus_scrofa___MAP4K3	4.45956	0.607254	8.21274e-06	0.0030626
Sus_scrofa___RABGAP1	4.36502	0.836101	1.27112e-05	0.00455421
Sus_scrofa___HERC6	4.30109	0.68771	1.69963e-05	0.00597239
Sus_scrofa___R3HDM1	4.24812	0.800015	2.15575e-05	0.0073628
Sus_scrofa___RIN2	4.24269	0.519773	2.20857e-05	0.00740837
Sus_scrofa___PDE7B	4.24258	0.662934	2.20964e-05	0.00740837
Sus_scrofa___NOP58	4.2162	1.18371	2.48449e-05	0.00810674
Sus_scrofa___ADAMTS6	4.1996	1.00448	2.6739e-05	0.00864759
Sus_scrofa___TMEM204	4.16117	1.33145	3.16618e-05	0.00997484
Sus_scrofa___ENSSSCG00000017146	4.15726	0.682205	3.22081e-05	0.0100602
Sus_scrofa___COMMD6	4.14478	0.798935	3.40137e-05	0.0105342
Sus_scrofa___PDE10A	4.14011	0.771506	3.47132e-05	0.0106605
Sus_scrofa___ADAMTS1	4.13393	1.02599	3.56616e-05	0.0107707
Sus_scrofa___FBN1	4.12796	0.695192	3.66e-05	0.0108941
Sus_scrofa___IFI44L	4.12676	0.80414	3.67904e-05	0.0108941
Sus_scrofa___SLC39A14	4.12568	0.685477	3.69644e-05	0.0108941
Sus_scrofa___ITGA1	4.08801	0.63225	4.35084e-05	0.0125198
Sus_scrofa___ZNF423	4.06522	1.2922	4.79874e-05	0.0135946
Sus_scrofa___EVA1C	4.04362	0.91662	5.26326e-05	0.0146829
Sus_scrofa___CHRM2	4.04112	1.73773	5.31961e-05	0.0147277
Sus_scrofa___ENSSSCG00000033189	3.98424	1.37232	6.76952e-05	0.0183253
Sus_scrofa___TPM1	3.97133	0.895215	7.14733e-05	0.0192058
Sus_scrofa___PCMTD1	3.938	0.723723	8.21621e-05	0.0219169
Sus_scrofa___ZBTB38	3.93171	0.7339	8.43443e-05	0.0223359
Sus_scrofa___RGS3	3.90653	1.07835	9.36325e-05	0.0246173
Sus_scrofa___NIPAL2	3.90457	1.03477	9.43921e-05	0.0246397
Sus_scrofa___PTPRG	3.88677	0.636414	0.000101586	0.0263296
Sus_scrofa___PTPN14	3.87885	0.666802	0.000104953	0.0270105
Sus_scrofa___BTNL9	3.87092	1.46551	0.000108424	0.0277087
Sus_scrofa___HEY1	3.85985	3.77157	0.000113456	0.0287933
Sus_scrofa___KDR	3.85225	0.677203	0.000117036	0.029497
Sus_scrofa___ENSSSCG00000023014	3.84487	1.88455	0.000120615	0.0301909

## Sheet: Antiinflam_EC
Gene	scores	log2FC	pvals	FDR
Sus_scrofa___KIT	7.28862	1.00268	3.13147e-13	5.72197e-09
Sus_scrofa___NEDD4L	6.15518	1.23626	7.49928e-10	4.65544e-06
Sus_scrofa___SMAD1	6.03327	1.23022	1.60678e-09	6.59606e-06
Sus_scrofa___KCTD16	6.01995	1.75813	1.74469e-09	6.59606e-06
Sus_scrofa___SERPINE1	5.80931	1.26141	6.27318e-09	1.91044e-05
Sus_scrofa___ARHGEF28	5.7746	0.932326	7.7136e-09	2.01352e-05
Sus_scrofa___LAMA4	5.55533	0.855658	2.77082e-08	6.75064e-05
Sus_scrofa___TRAF3	5.49432	1.44643	3.92211e-08	8.13715e-05
Sus_scrofa___ENSSSCG00000010172	5.4905	0.938665	4.0079e-08	8.13715e-05
Sus_scrofa___FILIP1	5.38082	0.912579	7.41492e-08	0.00014262
Sus_scrofa___FAM126A	5.17355	0.795777	2.29682e-07	0.000419686
Sus_scrofa___RAPGEF5	5.1335	0.9353	2.84404e-07	0.00049493
Sus_scrofa___ZBTB20	5.09388	0.522753	3.50807e-07	0.000534177
Sus_scrofa___PRKCA	5.05437	1.34452	4.3181e-07	0.000631221
Sus_scrofa___FBXL7	4.87232	0.666744	1.10294e-06	0.00155027
Sus_scrofa___PLEKHG1	4.86075	0.556448	1.1694e-06	0.0015828
Sus_scrofa___OSBPL10	4.82255	0.924295	1.41732e-06	0.00184985
Sus_scrofa___DDIT4	4.81524	0.885865	1.47022e-06	0.00185273
Sus_scrofa___OSBPL6	4.78195	2.57679	1.73601e-06	0.00204653
Sus_scrofa___FLNB	4.70261	0.784182	2.56861e-06	0.00276088
Sus_scrofa___EGLN3	4.57218	1.02241	4.82672e-06	0.00476737
Sus_scrofa___LOXL2	4.56531	1.21051	4.98767e-06	0.0047967
Sus_scrofa___RBM45	4.45474	1.65074	8.39931e-06	0.00787058
Sus_scrofa___KDM4C	4.43859	0.758398	9.05494e-06	0.00827282
Sus_scrofa___TEAD1	4.38544	0.645397	1.15752e-05	0.0100718
Sus_scrofa___CEP112	4.3324	0.731679	1.47495e-05	0.0122505
Sus_scrofa___ZNF292	4.32061	0.810841	1.55599e-05	0.0123617
Sus_scrofa___ARHGAP26	4.30555	0.628318	1.66573e-05	0.0126821
Sus_scrofa___CREB5	4.25065	1.20777	2.13152e-05	0.0155793
Sus_scrofa___SLC8A1	4.19084	0.958829	2.77925e-05	0.0191637
Sus_scrofa___ENSSSCG00000049691	4.18494	0.922886	2.85235e-05	0.0193035
Sus_scrofa___CARMIL1	4.16846	0.595156	3.06658e-05	0.0200122
Sus_scrofa___AGAP1	4.12841	0.672809	3.65281e-05	0.0230158
Sus_scrofa___TANC2	4.07384	0.952437	4.62445e-05	0.0281668
Sus_scrofa___SMAD3	4.05779	1.00913	4.95383e-05	0.0296783
Sus_scrofa___GBE1	4.03466	1.02257	5.46822e-05	0.0322316
Sus_scrofa___SLC12A2	4.02112	0.797552	5.79213e-05	0.033599
Sus_scrofa___GALNT1	4.00606	0.671676	6.17396e-05	0.034186
Sus_scrofa___ARHGAP21	3.92923	0.713281	8.52199e-05	0.0444909

## Sheet: Prolif_PCMV_PRV_sus
Gene	scores	log2FC	pvals	FDR
Sus_scrofa___DIAPH3	9.62797	7.59215	6.0923e-22	2.22643e-17
Sus_scrofa___ATAD2	8.3259	5.3206	8.36919e-17	1.52926e-12
Sus_scrofa___EZH2	7.87613	3.95464	3.3769e-15	4.11362e-11
Sus_scrofa___LMNB1	7.44858	4.25401	9.43518e-14	8.62021e-10
Sus_scrofa___TPX2	7.11207	7.19948	1.14314e-12	8.35521e-09
Sus_scrofa___NAV2	6.98234	2.23263	2.90299e-12	1.76816e-08
Sus_scrofa___NCAPG	6.46952	6.7555	9.83176e-11	5.02937e-07
Sus_scrofa___KIF11	6.45239	6.52044	1.10097e-10	5.02937e-07
Sus_scrofa___SYCP2	6.35806	1.78348	2.04317e-10	8.29642e-07
Sus_scrofa___KIF4A	6.33221	5.30117	2.41669e-10	8.7625e-07
Sus_scrofa___CENPP	6.31871	2.9702	2.6375e-10	8.7625e-07
Sus_scrofa___CIT	6.24101	4.84119	4.34762e-10	1.32403e-06
Sus_scrofa___ANLN	6.00805	6.09016	1.87763e-09	5.27831e-06
Sus_scrofa___NCAPD3	5.86976	4.03716	4.36416e-09	1.05271e-05
Sus_scrofa___KNTC1	5.86565	4.76894	4.47382e-09	1.05271e-05
Sus_scrofa___ENSSSCG00000009338	5.86071	1.65353	4.60895e-09	1.05271e-05
Sus_scrofa___ENSSSCG00000033654	5.83684	4.00435	5.32009e-09	1.14366e-05
Sus_scrofa___CEP128	5.74481	2.32262	9.2025e-09	1.86836e-05
Sus_scrofa___PBX3	5.70777	2.00141	1.14468e-08	2.20171e-05
Sus_scrofa___SMC2	5.58248	4.03721	2.3711e-08	4.33259e-05
Sus_scrofa___CENPF	5.5675	5.72108	2.58419e-08	4.44947e-05
Sus_scrofa___KCNB2	5.56125	2.59287	2.67857e-08	4.44947e-05
Sus_scrofa___MMS22L	5.54445	3.61271	2.94876e-08	4.68532e-05
Sus_scrofa___SMC4	5.48568	2.96465	4.11884e-08	6.27179e-05
Sus_scrofa___MAST2	5.45094	1.86223	5.01038e-08	7.32417e-05
Sus_scrofa___POLA1	5.44189	2.47831	5.27191e-08	7.41007e-05
Sus_scrofa___TOP2A	5.41999	6.18935	5.9602e-08	8.06724e-05
Sus_scrofa___PDS5B	5.36978	1.3135	7.88334e-08	0.000101543
Sus_scrofa___NCAPG2	5.36583	4.16721	8.05789e-08	0.000101543
Sus_scrofa___TRA2B	5.29191	1.25374	1.21047e-07	0.000147455
Sus_scrofa___SPIDR	5.20037	1.92342	1.98889e-07	0.000234464
Sus_scrofa___HMGB2	5.10686	4.07381	3.27552e-07	0.000374075
Sus_scrofa___CMSS1	5.03624	1.9209	4.74776e-07	0.000525779
Sus_scrofa___DLGAP5	5.00677	6.74405	5.5352e-07	0.000594952
Sus_scrofa___NUP205	4.90865	2.83174	9.17072e-07	0.000930955
Sus_scrofa___CKAP5	4.90157	2.3209	9.50751e-07	0.000939059
Sus_scrofa___DNA2	4.89449	5.01654	9.85619e-07	0.000947881
Sus_scrofa___SASS6	4.84526	3.779	1.26444e-06	0.00118484
Sus_scrofa___PRR11	4.74797	5.392	2.05472e-06	0.00172473
Sus_scrofa___ENSSSCG00000035544	4.74714	1.97686	2.0631e-06	0.00172473
Sus_scrofa___DEK	4.74583	1.37607	2.07657e-06	0.00172473
Sus_scrofa___CSPP1	4.72475	1.75868	2.30395e-06	0.00187106
Sus_scrofa___RBL1	4.70072	2.23051	2.5925e-06	0.00205962
Sus_scrofa___CDK5RAP2	4.61198	3.08219	3.9885e-06	0.00310127
Sus_scrofa___CDIN1	4.58976	2.40989	4.43765e-06	0.00337863
Sus_scrofa___PDE4B	4.55864	1.20593	5.14859e-06	0.0037631
Sus_scrofa___BRIP1	4.51814	3.2389	6.23849e-06	0.00447031
Sus_scrofa___CENPE	4.44043	4.72888	8.97772e-06	0.00619039
Sus_scrofa___CEP152	4.40026	3.05656	1.08119e-05	0.00731704
Sus_scrofa___GEN1	4.38479	6.36622	1.16098e-05	0.00771418
Sus_scrofa___RAD51B	4.37903	1.17871	1.1921e-05	0.00777952
Sus_scrofa___ECT2	4.34923	3.13005	1.36617e-05	0.00852329
Sus_scrofa___RRM1	4.34907	2.01753	1.36719e-05	0.00852329
Sus_scrofa___NSD2	4.34594	1.90583	1.38683e-05	0.00852329
Sus_scrofa___SRSF10	4.34396	1.21559	1.39936e-05	0.00852329
Sus_scrofa___GJC1	4.28453	1.39143	1.83127e-05	0.0109711
Sus_scrofa___PRIM2	4.2763	2.29513	1.90027e-05	0.0110803
Sus_scrofa___ENSSSCG00000004782	4.27515	5.02237	1.91013e-05	0.0110803
Sus_scrofa___CENPI	4.26955	3.83065	1.9587e-05	0.0111845
Sus_scrofa___STIL	4.26494	3.61935	1.99958e-05	0.0112422
Sus_scrofa___MTBP	4.22757	4.45873	2.36232e-05	0.0130805
Sus_scrofa___VRK1	4.2116	3.56051	2.53571e-05	0.013831
Sus_scrofa___RACGAP1	4.17406	6.79489	2.99217e-05	0.0160807
Sus_scrofa___MACROH2A1	4.15908	1.36115	3.19532e-05	0.0169236
Sus_scrofa___MYBL1	4.12368	4.96777	3.7286e-05	0.0191918
Sus_scrofa___CDK14	4.09405	1.39867	4.23901e-05	0.0215159
Sus_scrofa___MIS18BP1	4.08121	1.93537	4.48019e-05	0.0224286
Sus_scrofa___CNTLN	4.06705	1.23446	4.76118e-05	0.0235131
Sus_scrofa___WDHD1	4.03017	2.70937	5.57356e-05	0.0271581
Sus_scrofa___CEP57	4.01865	2.06552	5.85326e-05	0.0281457
Sus_scrofa___TK1	3.97222	4.34849	7.12048e-05	0.0337946
Sus_scrofa___REXO5	3.9607	3.48981	7.47305e-05	0.0350132
Sus_scrofa___FANCL	3.95625	3.34574	7.61341e-05	0.0352192
Sus_scrofa___USP1	3.94391	2.69634	8.01647e-05	0.036193
Sus_scrofa___KIF15	3.94374	5.74369	8.02198e-05	0.036193
Sus_scrofa___KIF20B	3.92975	3.98157	8.50347e-05	0.0378975
Sus_scrofa___FBXO5	3.90802	5.63314	9.30566e-05	0.0409729
Sus_scrofa___MBOAT1	3.87855	2.9453	0.000105082	0.0451789
Sus_scrofa___DTL	3.86505	4.70011	0.000111067	0.047197

## Sheet: Cap_EC
Gene	scores	log2FC	pvals	FDR
Sus_scrofa___ARL15	8.58336	0.816492	9.21436e-18	1.68369e-13
Sus_scrofa___CD36	7.95914	1.10771	1.73234e-15	2.11028e-11
Sus_scrofa___CYYR1	7.30181	0.811547	2.83917e-13	2.07515e-09
Sus_scrofa___SEMA6A	7.16615	1.17173	7.71343e-13	4.69812e-09
Sus_scrofa___ITGA1	6.9815	0.795608	2.9204e-12	1.52466e-08
Sus_scrofa___RASGRF2	6.91337	0.933469	4.73277e-12	2.16199e-08
Sus_scrofa___LNX1	6.72462	1.43066	1.76056e-11	5.84906e-08
Sus_scrofa___ABLIM3	6.69385	0.682068	2.17369e-11	6.61979e-08
Sus_scrofa___ARHGEF3	6.56693	0.889698	5.13633e-11	1.4439e-07
Sus_scrofa___PLCB4	6.39048	0.575024	1.65364e-10	4.31659e-07
Sus_scrofa___PDE7B	6.34103	0.895469	2.28229e-10	5.56041e-07
Sus_scrofa___FOXN3	6.05908	0.578724	1.36901e-09	2.63318e-06
Sus_scrofa___CLIC5	5.99695	0.640137	2.01059e-09	3.51038e-06
Sus_scrofa___NCOA3	5.99642	0.566235	2.01718e-09	3.51038e-06
Sus_scrofa___PTPRB	5.93451	0.531415	2.9472e-09	4.8957e-06
Sus_scrofa___EPAS1	5.90322	0.593342	3.56478e-09	5.66413e-06
Sus_scrofa___ADGRF5	5.79278	0.545931	6.92321e-09	9.7311e-06
Sus_scrofa___FLT1	5.73664	0.644825	9.65706e-09	1.26042e-05
Sus_scrofa___AFDN	5.28174	0.586727	1.27964e-07	0.00012639
Sus_scrofa___TSC22D1	5.2572	0.641657	1.46261e-07	0.000137054
Sus_scrofa___LDB2	5.14433	0.544103	2.68473e-07	0.000233604
Sus_scrofa___NCALD	5.11957	0.924648	3.06232e-07	0.000260261
Sus_scrofa___HERC6	4.91578	0.657742	8.84303e-07	0.000646337
Sus_scrofa___FRMD3	4.8007	0.782816	1.58109e-06	0.00107002
Sus_scrofa___STOX2	4.78171	0.61278	1.73806e-06	0.00115486
Sus_scrofa___ENSSSCG00000012362	4.77564	0.533718	1.79138e-06	0.00116904
Sus_scrofa___ASAP2	4.67287	0.535995	2.97022e-06	0.00190433
Sus_scrofa___FABP5	4.60967	0.556004	4.03304e-06	0.00254117
Sus_scrofa___ROBO4	4.60405	0.708994	4.1435e-06	0.00256651
Sus_scrofa___PPP1R16B	4.56881	0.80157	4.90507e-06	0.00289122
Sus_scrofa___MEOX2	4.54815	0.660236	5.41203e-06	0.00313941
Sus_scrofa___AFAP1L1	4.3641	0.714327	1.27645e-05	0.00647888
Sus_scrofa___PTPRG	4.30364	0.614088	1.68013e-05	0.00787185
Sus_scrofa___PRICKLE2	4.27615	1.03037	1.90157e-05	0.00874605
Sus_scrofa___SEL1L3	4.20444	0.792033	2.61727e-05	0.0112527
Sus_scrofa___AIG1	4.15803	0.908402	3.21e-05	0.0136407
Sus_scrofa___SPARCL1	4.12431	0.755348	3.71852e-05	0.0152689
Sus_scrofa___ENSSSCG00000003839	4.11238	0.593254	3.91597e-05	0.015901
Sus_scrofa___AQP1	4.05762	0.999993	4.95759e-05	0.0196929
Sus_scrofa___ENSSSCG00000048263	4.03643	0.529027	5.42718e-05	0.0204603
Sus_scrofa___HIPK2	3.95143	0.804707	7.76857e-05	0.0281091
Sus_scrofa___BTNL9	3.83803	1.39783	0.000124027	0.0427602

## Sheet: NFkB_EC
Gene	scores	log2FC	pvals	FDR
Sus_scrofa___RGMB	6.95316	1.90096	3.57204e-12	6.52701e-08
Sus_scrofa___FGF2	6.63314	2.2568	3.28626e-11	4.00322e-07
Sus_scrofa___ENSSSCG00000038187	6.5842	3.18439	4.57353e-11	4.17849e-07
Sus_scrofa___RAI14	6.50875	1.17569	7.57782e-11	5.53863e-07
Sus_scrofa___IL1R1	6.44669	3.80874	1.1432e-10	6.96304e-07
Sus_scrofa___SLCO2A1	6.40405	1.52547	1.51312e-10	7.89958e-07
Sus_scrofa___NFKBIZ	6.29908	1.55637	2.99419e-10	1.34676e-06
Sus_scrofa___PLPP1	6.2832	1.38066	3.31668e-10	1.34676e-06
Sus_scrofa___CAMK2D	6.22088	1.329	4.94379e-10	1.80671e-06
Sus_scrofa___CXCL2	6.01134	2.16081	1.83998e-09	5.60352e-06
Sus_scrofa___SNTB2	5.86557	1.20568	4.47607e-09	1.25829e-05
Sus_scrofa___TMTC1	5.63831	1.76153	1.71726e-08	3.94331e-05
Sus_scrofa___RASAL2	5.52875	0.71243	3.22518e-08	6.93319e-05
Sus_scrofa___LIFR	5.46262	1.06625	4.69153e-08	9.5251e-05
Sus_scrofa___GHSR	5.33482	1.45147	9.5637e-08	0.000149899
Sus_scrofa___DDR2	5.32958	1.88837	9.84422e-08	0.000149899
Sus_scrofa___LTBP1	5.31357	1.84461	1.07499e-07	0.000157142
Sus_scrofa___CXCL10	5.23878	2.50695	1.61642e-07	0.0002272
Sus_scrofa___RSAD2	5.19653	1.61899	2.03043e-07	0.000274822
Sus_scrofa___COL28A1	5.13788	3.49619	2.77855e-07	0.000350146
Sus_scrofa___NFAT5	4.91259	1.01651	8.98792e-07	0.00102645
Sus_scrofa___CD36	4.77876	1.18497	1.76379e-06	0.0017421
Sus_scrofa___MX1	4.77194	1.6214	1.82462e-06	0.00175475
Sus_scrofa___LRP11	4.73087	1.44958	2.2356e-06	0.00209487
Sus_scrofa___ADAMTS9	4.72155	0.871989	2.3405e-06	0.00213834
Sus_scrofa___OAS2	4.70318	1.2593	2.56135e-06	0.00228303
Sus_scrofa___PBX1	4.6587	1.3428	3.18205e-06	0.00276876
Sus_scrofa___RHOJ	4.6263	1.10086	3.72263e-06	0.0030919
Sus_scrofa___ZC3HAV1	4.61619	1.07473	3.90843e-06	0.00317408
Sus_scrofa___ENSSSCG00000017146	4.60648	1.02012	4.09535e-06	0.00325358
Sus_scrofa___MX2	4.52343	1.17475	6.08459e-06	0.00466713
Sus_scrofa___NCOA3	4.52185	0.673586	6.13004e-06	0.00466713
Sus_scrofa___CCND3	4.49102	1.03059	7.0883e-06	0.00521285
Sus_scrofa___ENSSSCG00000014565	4.37083	1.11247	1.23774e-05	0.00822915
Sus_scrofa___MGMT	4.3707	1.23783	1.23848e-05	0.00822915
Sus_scrofa___ITPR1	4.36178	0.88903	1.29009e-05	0.00839787
Sus_scrofa___TXNIP	4.35758	0.930187	1.31508e-05	0.00839787
Sus_scrofa___EIF2AK2	4.35207	0.888169	1.34858e-05	0.00839787
Sus_scrofa___FOXP1	4.3501	0.712443	1.36075e-05	0.00839787
Sus_scrofa___BST2	4.33449	1.29822	1.461e-05	0.00872536
Sus_scrofa___ZFPM2	4.3316	2.75366	1.48029e-05	0.00872536
Sus_scrofa___SNX9	4.3026	0.80407	1.68803e-05	0.00979189
Sus_scrofa___MRTFB	4.29604	0.671968	1.73874e-05	0.00992846
Sus_scrofa___LIMCH1	4.26258	1.16631	2.02076e-05	0.0111892
Sus_scrofa___ACTN1	4.24802	1.02598	2.15667e-05	0.0117635
Sus_scrofa___TEK	4.23241	0.986953	2.31204e-05	0.0124255
Sus_scrofa___ATP11C	4.18202	0.962667	2.88927e-05	0.0153027
Sus_scrofa___ENSSSCG00000034976	4.15722	2.14684	3.22138e-05	0.0168179
Sus_scrofa___LYST	4.14043	0.990647	3.46656e-05	0.017843
Sus_scrofa___HERC5	4.11957	1.21364	3.79585e-05	0.0192666
Sus_scrofa___PRICKLE1	4.11025	1.41018	3.95229e-05	0.0193459
Sus_scrofa___EPSTI1	4.10999	1.49281	3.95678e-05	0.0193459
Sus_scrofa___AAK1	4.1092	0.995592	3.97029e-05	0.0193459
Sus_scrofa___ISG15	4.09044	1.25166	4.30558e-05	0.0205855
Sus_scrofa___ENSSSCG00000034570	4.08873	1.14864	4.33735e-05	0.0205855
Sus_scrofa___VCAM1	4.06603	3.41389	4.782e-05	0.0222962
Sus_scrofa___SYBU	4.0642	1.22796	4.81981e-05	0.0222962
Sus_scrofa___SLC39A14	4.05921	0.96893	4.92388e-05	0.0224929
Sus_scrofa___STK38L	4.05475	1.35894	5.01879e-05	0.0226434
Sus_scrofa___ENSSSCG00000000657	4.04675	1.55047	5.19345e-05	0.0231457
Sus_scrofa___MSRB3	4.03258	0.833551	5.51688e-05	0.0242909
Sus_scrofa___SRPK2	4.02693	0.802152	5.65089e-05	0.0245848
Sus_scrofa___TNFRSF11A	4.00214	0.926657	6.27734e-05	0.0263684
Sus_scrofa___B4GALT5	3.99295	1.19095	6.52562e-05	0.026959
Sus_scrofa___ENSSSCG00000032591	3.99151	1.30375	6.56547e-05	0.026959
Sus_scrofa___ISG12(A)	3.98259	1.28489	6.81697e-05	0.0272289
Sus_scrofa___SETX	3.98167	0.761888	6.84337e-05	0.0272289
Sus_scrofa___DENND5B	3.98127	0.983764	6.85471e-05	0.0272289
Sus_scrofa___GHR	3.96422	0.916774	7.36376e-05	0.0286286
Sus_scrofa___SCFD2	3.9549	1.00225	7.65667e-05	0.0294266
Sus_scrofa___EPS8	3.95162	1.19022	7.7624e-05	0.0294266
Sus_scrofa___TINAGL1	3.94821	1.43332	7.87382e-05	0.0294266
Sus_scrofa___REV3L	3.94768	0.904786	7.8911e-05	0.0294266
Sus_scrofa___PARP14	3.91344	0.988447	9.09913e-05	0.0332472
Sus_scrofa___STAT1	3.91108	0.959284	9.18857e-05	0.0332472
Sus_scrofa___PLSCR4	3.90819	1.25812	9.29903e-05	0.033317
Sus_scrofa___EHD4	3.87224	1.13217	0.00010784	0.0378945
Sus_scrofa___UCK2	3.82264	1.68159	0.00013203	0.0455191
Sus_scrofa___ENSSSCG00000016263	3.82015	0.722896	0.000133371	0.0455519
Sus_scrofa___ENSSSCG00000014280	3.79561	0.789496	0.000147279	0.0498364

## Sheet: Cap_EC_ISG
Gene	scores	log2FC	pvals	FDR
Sus_scrofa___THBS1	10.3335	2.87312	4.97328e-25	1.81749e-20
Sus_scrofa___SERPINE1	9.89414	2.33151	4.41377e-23	8.06506e-19
Sus_scrofa___MED13L	7.79318	0.861808	6.53425e-15	4.77588e-11
Sus_scrofa___ENPP1	7.37847	1.55327	1.60122e-13	9.75277e-10
Sus_scrofa___CRIM1	6.96943	1.18522	3.18226e-12	1.66137e-08
Sus_scrofa___ISG15	6.87903	2.13124	6.02621e-12	2.75285e-08
Sus_scrofa___CCN2	6.71136	2.61422	1.92817e-11	7.82943e-08
Sus_scrofa___SLC12A2	6.55661	1.39518	5.50451e-11	1.92963e-07
Sus_scrofa___COL12A1	6.54859	2.12888	5.80817e-11	1.92963e-07
Sus_scrofa___UGP2	6.45029	2.13923	1.11639e-10	3.39988e-07
Sus_scrofa___PARD3	6.18899	1.5072	6.05516e-10	1.7022e-06
Sus_scrofa___RGMB	6.082	1.5232	1.18695e-09	2.55158e-06
Sus_scrofa___SORBS2	5.8698	0.90036	4.36329e-09	8.39244e-06
Sus_scrofa___ZFP36L2	5.76681	1.14089	8.0784e-09	1.40583e-05
Sus_scrofa___MERTK	5.6733	1.44302	1.40077e-08	2.2257e-05
Sus_scrofa___HERC5	5.55317	1.46607	2.8054e-08	4.10094e-05
Sus_scrofa___RSAD2	5.47468	1.57887	4.3831e-08	5.74235e-05
Sus_scrofa___CCN1	5.47401	2.37554	4.39966e-08	5.74235e-05
Sus_scrofa___LIFR	5.40721	0.898267	6.40143e-08	8.0669e-05
Sus_scrofa___ISG12(A)	5.38973	1.48689	7.05635e-08	8.59581e-05
Sus_scrofa___ENSSSCG00000034570	5.35533	1.22786	8.54011e-08	0.000100677
Sus_scrofa___ACKR3	5.32293	1.25169	1.02109e-07	0.000110832
Sus_scrofa___CORO1C	5.26571	0.867471	1.39652e-07	0.000145817
Sus_scrofa___ANGPT2	5.25903	1.07174	1.44821e-07	0.000147013
Sus_scrofa___USP53	5.22785	1.619	1.7149e-07	0.000169381
Sus_scrofa___CCSER2	5.09971	0.95085	3.40177e-07	0.000310794
Sus_scrofa___PRSS23	5.06542	1.70135	4.07505e-07	0.000363226
Sus_scrofa___RGS2	5.04838	1.3951	4.45563e-07	0.000387693
Sus_scrofa___DOCK7	4.9965	1.26791	5.83793e-07	0.00048488
Sus_scrofa___EIF2AK2	4.89675	0.995953	9.74353e-07	0.000791283
Sus_scrofa___JAK1	4.83073	0.710418	1.36034e-06	0.00108073
Sus_scrofa___PID1	4.76694	1.55957	1.8705e-06	0.00145441
Sus_scrofa___RUNX2	4.75035	2.25215	2.03069e-06	0.00148423
Sus_scrofa___VMP1	4.73955	0.821357	2.14197e-06	0.00153487
Sus_scrofa___CLIP1	4.70036	1.17732	2.59706e-06	0.00172563
Sus_scrofa___OAS2	4.68711	0.921063	2.77091e-06	0.00178914
Sus_scrofa___TMTC2	4.65471	0.723633	3.24435e-06	0.00204422
Sus_scrofa___USP18	4.64469	1.22923	3.40585e-06	0.00210961
Sus_scrofa___BIRC3	4.63601	0.985728	3.55203e-06	0.00216348
Sus_scrofa___PARP14	4.60328	1.23635	4.15897e-06	0.00249163
Sus_scrofa___LRRFIP1	4.58112	0.961271	4.62491e-06	0.00268711
Sus_scrofa___ZNHIT6	4.5731	1.22408	4.8055e-06	0.00274402
Sus_scrofa___ADM	4.56976	1.12791	4.88273e-06	0.00274413
Sus_scrofa___ENSSSCG00000010448	4.5318	1.30809	5.84832e-06	0.00314304
Sus_scrofa___NOX4	4.52512	0.770882	6.03612e-06	0.00319696
Sus_scrofa___MX2	4.45732	1.05762	8.29913e-06	0.00427171
Sus_scrofa___KLHL5	4.43895	0.9888	9.03994e-06	0.00452555
Sus_scrofa___EPHA4	4.41434	1.07059	1.01317e-05	0.00500354
Sus_scrofa___ENSSSCG00000022925	4.40466	0.700432	1.05951e-05	0.0050947
Sus_scrofa___ENSSSCG00000014565	4.40032	1.11969	1.08093e-05	0.00513022
Sus_scrofa___MX1	4.38707	1.26248	1.14889e-05	0.00538285
Sus_scrofa___MGMT	4.36168	1.05142	1.29065e-05	0.0059705
Sus_scrofa___SAT1	4.33719	1.06531	1.44316e-05	0.00659252
Sus_scrofa___PRKCA	4.25213	0.916264	2.11745e-05	0.00932315
Sus_scrofa___SAMD9	4.24423	1.03186	2.19348e-05	0.00954293
Sus_scrofa___ARNTL2	4.23076	1.37273	2.32907e-05	0.0100136
Sus_scrofa___ENSSSCG00000039544	4.21751	0.883233	2.47017e-05	0.0103762
Sus_scrofa___ADAM9	4.19146	0.787526	2.7717e-05	0.0113811
Sus_scrofa___HSPB1	4.18533	0.940801	2.84749e-05	0.0114803
Sus_scrofa___ERC1	4.18444	0.592186	2.85868e-05	0.0114803
Sus_scrofa___IFIT1	4.09794	0.933496	4.1685e-05	0.0163804
Sus_scrofa___TXNIP	4.05808	0.900154	4.9478e-05	0.0188351
Sus_scrofa___IFIH1	4.04606	0.918482	5.2088e-05	0.0192736
Sus_scrofa___CAMK2D	4.0455	0.846868	5.22119e-05	0.0192736
Sus_scrofa___NFKBIZ	4.04227	0.779586	5.29363e-05	0.0193456
Sus_scrofa___IGF2BP2	4.02201	0.817367	5.77043e-05	0.0206745
Sus_scrofa___CHST1	4.01076	0.762295	6.05229e-05	0.0212674
Sus_scrofa___MGAT5	3.98371	0.568747	6.7848e-05	0.0236143
Sus_scrofa___CXCL2	3.97803	1.11968	6.94884e-05	0.0239571
Sus_scrofa___ZNFX1	3.97313	0.832977	7.09336e-05	0.0242268
Sus_scrofa___NAMPT	3.96367	1.3094	7.38066e-05	0.0247455
Sus_scrofa___LAMA4	3.92749	0.596524	8.58385e-05	0.028261
Sus_scrofa___ENSSSCG00000017146	3.92526	0.836622	8.66364e-05	0.028269
Sus_scrofa___MBNL2	3.91513	0.610005	9.03563e-05	0.0292219
Sus_scrofa___ENSSSCG00000001341	3.91257	0.710092	9.13201e-05	0.0292745
Sus_scrofa___CCDC180	3.86725	0.928654	0.000110067	0.0343771
Sus_scrofa___ENSSSCG00000005247	3.8657	0.713149	0.000110773	0.0343771
Sus_scrofa___IFI44L	3.86414	0.884246	0.000111482	0.0343771
Sus_scrofa___MTMR10	3.86314	1.15136	0.000111941	0.0343771
Sus_scrofa___DTX3L	3.851	1.31367	0.000117636	0.0355291
Sus_scrofa___PARP12	3.8382	0.724124	0.000123941	0.0371264
Sus_scrofa___RUSC2	3.78665	0.938271	0.000152692	0.0442867
Sus_scrofa___EMP1	3.77051	0.686325	0.000162916	0.0464218
Sus_scrofa___ENSSSCG00000017754	3.76906	1.11557	0.000163864	0.0464218
Sus_scrofa___MOSPD2	3.76294	0.888558	0.00016793	0.0472078

## Sheet: Angiogenic_cap_EC
Gene	scores	log2FC	pvals	FDR
Sus_scrofa___KIT	12.3329	1.47863	6.02384e-35	2.20141e-30
Sus_scrofa___MYO1E	12.1114	1.50762	9.1861e-34	1.67853e-29
Sus_scrofa___ARHGAP18	11.6381	2.07106	2.63941e-31	3.21524e-27
Sus_scrofa___MYO10	10.4057	1.3537	2.33637e-25	2.13456e-21
Sus_scrofa___ENSSSCG00000022925	10.2796	1.46902	8.70473e-25	6.36228e-21
Sus_scrofa___MYO1B	9.8332	1.59166	8.10065e-23	4.93397e-19
Sus_scrofa___OSBPL10	9.76832	1.75014	1.53981e-22	8.03892e-19
Sus_scrofa___TCF4	9.34517	0.775674	9.17438e-21	4.19097e-17
Sus_scrofa___PDGFD	8.73103	1.34259	2.52365e-18	1.02474e-14
Sus_scrofa___ARHGEF28	8.45188	1.22229	2.8666e-17	1.0476e-13
Sus_scrofa___MYO1D	8.17931	1.34959	2.8548e-16	9.48443e-13
Sus_scrofa___RAPGEF2	8.12593	0.897664	4.43931e-16	1.35196e-12
Sus_scrofa___ANGPT2	7.65068	1.60975	1.99913e-14	5.21844e-11
Sus_scrofa___UNC5B	7.54325	1.6467	4.58404e-14	1.11682e-10
Sus_scrofa___MAST4	7.3042	0.76318	2.78923e-13	6.37078e-10
Sus_scrofa___SPRED2	7.20974	1.2008	5.60592e-13	1.1398e-09
Sus_scrofa___ENSSSCG00000010172	7.20954	1.11958	5.61402e-13	1.1398e-09
Sus_scrofa___ADGRL2	7.10889	0.970155	1.1698e-12	2.25002e-09
Sus_scrofa___ENSSSCG00000044700	7.10014	0.751953	1.24629e-12	2.27729e-09
Sus_scrofa___RCSD1	7.0101	1.54347	2.3814e-12	4.1442e-09
Sus_scrofa___ARHGAP21	6.84645	1.03511	7.57073e-12	1.24664e-08
Sus_scrofa___EGLN3	6.84133	1.45113	7.84588e-12	1.24664e-08
Sus_scrofa___CHST1	6.72564	1.52935	1.74819e-11	2.66198e-08
Sus_scrofa___DGKH	6.71257	0.658233	1.91226e-11	2.79535e-08
Sus_scrofa___ENSSSCG00000029160	6.60789	1.27944	3.89844e-11	5.27661e-08
Sus_scrofa___FAM126A	6.48512	0.889079	8.86621e-11	1.1572e-07
Sus_scrofa___NRP2	6.47607	0.999671	9.4139e-11	1.18631e-07
Sus_scrofa___DOCK9	6.36766	0.517788	1.91937e-10	2.33811e-07
Sus_scrofa___ENSSSCG00000049691	6.21235	1.34111	5.21968e-10	5.96104e-07
Sus_scrofa___CALCRL	6.15436	0.773798	7.53811e-10	8.34789e-07
Sus_scrofa___ERO1A	6.13716	1.30051	8.40103e-10	9.02987e-07
Sus_scrofa___CDK17	6.08546	0.744795	1.1616e-09	1.21287e-06
Sus_scrofa___DOCK4	5.99109	0.621238	2.08433e-09	2.11589e-06
Sus_scrofa___KLF6	5.89162	1.04399	3.82424e-09	3.67782e-06
Sus_scrofa___ADM	5.88661	1.77725	3.94201e-09	3.69387e-06
Sus_scrofa___ARHGAP29	5.83913	0.672888	5.24733e-09	4.79409e-06
Sus_scrofa___ENSSSCG00000022128	5.74821	1.26772	9.01926e-09	7.81372e-06
Sus_scrofa___RNF149	5.74497	1.02232	9.19387e-09	7.81372e-06
Sus_scrofa___HSPG2	5.73189	0.704685	9.93151e-09	8.2488e-06
Sus_scrofa___EXT1	5.65572	0.676211	1.55197e-08	1.20674e-05
Sus_scrofa___ENSSSCG00000033497	5.51811	0.63582	3.42673e-08	2.5046e-05
Sus_scrofa___CCDC85A	5.36998	0.626157	7.87466e-08	5.4298e-05
Sus_scrofa___ETS1	5.26706	0.589882	1.38623e-07	8.88768e-05
Sus_scrofa___PHACTR2	5.21143	0.513797	1.87391e-07	0.000114137
Sus_scrofa___COL4A2	5.1844	0.599071	2.16713e-07	0.000129832
Sus_scrofa___SVIL	5.07913	0.616998	3.79174e-07	0.000213184
Sus_scrofa___RPS6KA2	5.03136	1.51623	4.87024e-07	0.000261739
Sus_scrofa___TSPAN5	4.99862	2.36757	5.77409e-07	0.000305818
Sus_scrofa___PARD3B	4.98683	0.810466	6.13784e-07	0.000320439
Sus_scrofa___ENSSSCG00000011729	4.98319	0.749035	6.25439e-07	0.000321925
Sus_scrofa___ACTG1	4.92736	1.00933	8.33477e-07	0.000406463
Sus_scrofa___LAMA4	4.92687	0.692407	8.35575e-07	0.000406463
Sus_scrofa___CHST15	4.92461	0.809339	8.45293e-07	0.000406463
Sus_scrofa___MCAM	4.91429	1.54773	8.91057e-07	0.000417483
Sus_scrofa___ITGA6	4.87625	0.672815	1.08122e-06	0.000493917
Sus_scrofa___C1orf21	4.85767	0.614812	1.18775e-06	0.000535879
Sus_scrofa___PICALM	4.833	0.532147	1.34491e-06	0.000599389
Sus_scrofa___PALD1	4.81953	1.08276	1.43895e-06	0.00063357
Sus_scrofa___PLCB1	4.72488	0.691807	2.30256e-06	0.000978453
Sus_scrofa___PCDH17	4.6945	0.645264	2.67255e-06	0.0010974
Sus_scrofa___IVNS1ABP	4.69106	0.860844	2.71789e-06	0.00110361
Sus_scrofa___NR3C2	4.68123	1.01677	2.85153e-06	0.00112053
Sus_scrofa___TP53I11	4.6486	1.68934	3.34195e-06	0.00125877
Sus_scrofa___PLEKHG1	4.61538	0.523453	3.92382e-06	0.00143396
Sus_scrofa___PPP1R13B	4.60171	0.771971	4.19028e-06	0.00151618
Sus_scrofa___DPYD	4.57203	0.530929	4.83023e-06	0.00171379
Sus_scrofa___ASAP2	4.54156	0.618399	5.58399e-06	0.00194349
Sus_scrofa___XYLT1	4.53291	1.21267	5.8177e-06	0.00200573
Sus_scrofa___NRP1	4.46597	0.517595	7.97065e-06	0.00260078
Sus_scrofa___FILIP1	4.45732	0.596718	8.29903e-06	0.00268397
Sus_scrofa___CCSER1	4.40562	0.583202	1.05482e-05	0.00323938
Sus_scrofa___ACKR3	4.34438	1.29324	1.39669e-05	0.00418376
Sus_scrofa___RASGRP3	4.3375	0.664145	1.44112e-05	0.00424723
Sus_scrofa___FAM91A1	4.21857	1.11172	2.45861e-05	0.00675564
Sus_scrofa___CNKSR3	4.20618	0.605529	2.59723e-05	0.00697909
Sus_scrofa___ENSSSCG00000006231	4.14573	0.576178	3.38733e-05	0.00883609
Sus_scrofa___PLXNA2	4.12882	0.566071	3.64624e-05	0.0092536
Sus_scrofa___LAMB1	4.01362	0.704695	5.97937e-05	0.0140978
Sus_scrofa___TMEM45A	3.98001	1.45994	6.89132e-05	0.0157532
Sus_scrofa___ENSSSCG00000033385	3.97263	0.531133	7.10819e-05	0.0161347
Sus_scrofa___FOXO1	3.94344	0.760889	8.03205e-05	0.018008
Sus_scrofa___WWTR1	3.90363	0.52289	9.47595e-05	0.0204534
Sus_scrofa___UBB	3.88279	0.811278	0.000103263	0.0216881
Sus_scrofa___SYCP2	3.80357	0.759142	0.000142626	0.028797
Sus_scrofa___SMAD1	3.73575	0.772382	0.000187158	0.0352562
Sus_scrofa___PAPSS1	3.70862	0.886863	0.000208393	0.039055
Sus_scrofa___ACTN4	3.69604	0.516284	0.000218991	0.0408318
Sus_scrofa___PTPRK	3.65829	0.508042	0.000253902	0.0466273
Sus_scrofa___ACVR2A	3.65289	0.734687	0.000259309	0.0471466

## Sheet: Angiogenic_arterial_EC
Gene	scores	log2FC	pvals	FDR
Sus_scrofa___FNDC3B	5.11035	0.787723	3.21568e-07	0.00174065
Sus_scrofa___FKBP5	5.08886	0.870444	3.6022e-07	0.00174065
Sus_scrofa___VIM	4.65618	1.14295	3.22126e-06	0.00905545
Sus_scrofa___EGLN3	4.44355	1.34693	8.84874e-06	0.017002
Sus_scrofa___KIT	4.34886	0.830592	1.36845e-05	0.0238144
Sus_scrofa___RORA	4.25907	1.77749	2.05282e-05	0.0341001
Sus_scrofa___DDIT4	4.18587	1.16725	2.84079e-05	0.043257
Sus_scrofa___CCSER1	4.16453	0.820424	3.11995e-05	0.0456074
Sus_scrofa___ENSSSCG00000007188	4.13593	1.22241	3.53518e-05	0.0496896
