# Supplementary material for: Integrated Molecular Profiling of Preclinical and Clinical Cardiac Xenotransplants
Source: Research Square preprint supplement (doi:10.21203/rs.3.rs-8406985/v1), 2026-02-04
Supplement: Supplementary file 23 [file a8ec0adfc28c9ba825edee82.xlsx]

## Sheet: CM
gene	Species	p_val	avg_log2FC	pct. 1	pct.2	p_val_adj	level
EIF2AK2	Pig	0	7.18101	792	17	0	Up-regulated
ANKRD1	Pig	0	4.72327	991	279	0	Up-regulated
IFI44	Pig	0	14.4413	696	0	0	Up-regulated
SERPINE1	Pig	0	9.12081	689	6	0	Up-regulated
CRYAB	Pig	0	4.40289	887	0.21	0	Up-regulated
SLCO6A1	Pig	0	8.2295	673	9	0	Up-regulated
ENSSSCG00000010190	Pig	0	4.94416	749	99	0	Up-regulated
IFI44L	Pig	0	8.89103	652	5	0	Up-regulated
ISG12(A)	Pig	0	14.3144	642	0	0	Up-regulated
STAT1	Pig	0	4.78986	693	62	0	Up-regulated
B2M	Pig	0	8.28868	634	4	0	Up-regulated
ENSSSCG00000034570	Pig	0	14.5558	625	0	0	Up-regulated
FBXO39	Pig	0	5.91239	0.64	0.02	0	Up-regulated
HSPB1	Pig	0	4.3517	661	68	0	Up-regulated
CDC14A	Pig	0	3.65715	747	165	0	Up-regulated
ENSSSCG00000033786	Pig	0	4.38718	649	75	0	Up-regulated
ISG15	Pig	0	10.4989	573	1	0	Up-regulated
ENSSSCG00000001229	Pig	0	8.78631	562	1	0	Up-regulated
DES	Pig	0	2.74764	838	282	0	Up-regulated
XIRP2	Pig	0	5.33062	575	54	0	Up-regulated
MAP1B	Pig	0	2.67123	751	235	0	Up-regulated
CD44	Pig	0	4.17493	576	69	0	Up-regulated
IFIT1	Pig	0	9.50845	498	2	0	Up-regulated
CSRP3	Pig	0	2.62347	811	317	0	Up-regulated
SNX24	Pig	0	3.50436	576	88	0	Up-regulated
RNF19A	Pig	0	2.90339	733	249	0	Up-regulated
RPP30	Pig	0	3.90912	545	66	0	Up-regulated
ACTG1	Pig	0	2.34607	699	0.22	0	Up-regulated
LMNTD1	Pig	0	2.29924	711	234	0	Up-regulated
PPFIA4	Pig	0	2.47581	689	214	0	Up-regulated
BAG3	Pig	0	2.77379	635	161	0	Up-regulated
RNF115	Pig	0	2.59157	684	211	0	Up-regulated
IFIH1	Pig	0	11.4813	473	0	0	Up-regulated
LIMCH1	Pig	0	3.15145	593	122	0	Up-regulated
HERC6	Pig	0	13.3641	0.47	0	0	Up-regulated
SLC25A13	Pig	0	2.37217	685	216	0	Up-regulated
HK1	Pig	0	2.257	684	218	0	Up-regulated
P4HA1	Pig	0	3.63818	567	101	0	Up-regulated
ASAP1	Pig	0	3.09423	598	138	0	Up-regulated
BMPR1B	Pig	0	4.0451	0.5	46	0	Up-regulated
XIAP	Pig	0	2.41158	679	226	0	Up-regulated
RSAD2	Pig	0	12.4152	448	0	0	Up-regulated
TESC	Pig	0	2.33944	625	178	0	Up-regulated
ENSSSCG00000029160	Pig	0	7.32583	448	6	0	Up-regulated
GAPDH	Pig	0	2.63052	701	259	0	Up-regulated
NEDD4L	Pig	0	2.20635	784	344	0	Up-regulated
CALD1	Pig	0	2.17862	673	233	0	Up-regulated
TSC22D1	Pig	0	3.87549	503	63	0	Up-regulated
MKLN1	Pig	0	2.40796	819	379	0	Up-regulated
MEMO1	Pig	0	2.31047	638	204	0	Up-regulated
HSPB8	Pig	0	2.423	635	202	0	Up-regulated
NPPB	Pig	0	14.6883	431	0	0	Up-regulated
MAGI1	Pig	0	2.12588	664	237	0	Up-regulated
OAS2	Pig	0	8.3583	428	2	0	Up-regulated
SSBP2	Pig	0	2.68328	921	496	0	Up-regulated
VCL	Pig	0	2.13127	868	444	0	Up-regulated
GADD45G	Pig	0	2.48349	555	134	0	Up-regulated
ENSSSCG00000049691	Pig	0	3.32732	508	88	0	Up-regulated
ENSSSCG00000004207	Pig	0	2.91649	608	191	0	Up-regulated
ITGB8	Pig	0	2.66788	579	163	0	Up-regulated
MTPN	Pig	0	2.83363	552	139	0	Up-regulated
GPNMB	Pig	0	4.85906	437	29	0	Up-regulated
NCAM1	Pig	0	2.78766	949	541	0	Up-regulated
ATAD1	Pig	0	1.97657	804	399	0	Up-regulated
EIF4G3	Pig	0	1.99595	816	419	0	Up-regulated
DDX5	Pig	0	2.27615	825	435	0	Up-regulated
SCAF8	Pig	0	1.85924	764	375	0	Up-regulated
PARP12	Pig	0	9.22991	0.39	1	0	Up-regulated
ENSSSCG00000010440	Pig	0	3.13258	494	0.11	0	Up-regulated
STXBP5L	Pig	0	4.71517	0.4	25	0	Up-regulated
DDX60	Pig	0	8.30818	377	2	0	Up-regulated
MX1	Pig	0	10.9324	371	0	0	Up-regulated
USP25	Pig	0	1.99634	846	478	0	Up-regulated
ROBO1	Pig	0	5.95041	369	19	0	Up-regulated
HDAC9	Pig	0	2.3198	917	569	0	Up-regulated
ENSSSCG00000017146	Pig	0	4.47905	375	29	0	Up-regulated
GLIS3	Pig	0	4.4505	0.36	28	0	Up-regulated
GK5	Pig	0	5.44633	345	18	0	Up-regulated
ZDHHC14	Pig	0	9.06697	327	1	0	Up-regulated
RPLP1	Pig	0	5.25447	333	13	0	Up-regulated
USP18	Pig	0	5.55215	324	9	0	Up-regulated
ENSSSCG00000033262	Pig	0	5.11476	316	9	0	Up-regulated
ANO6	Pig	0	9.74481	0.3	0	0	Up-regulated
MYL2	Pig	0	2.55713	847	548	0	Up-regulated
PSME4	Pig	0	1.52543	892	631	0	Up-regulated
MBNL1	Pig	0	1.67065	893	671	0	Up-regulated
PARD3B	Pig	0	1.85734	939	727	0	Up-regulated
NRAP	Pig	0	2.05036	949	742	0	Up-regulated
QKI	Pig	0	1.42393	965	0.91	0	Up-regulated
RTN4	Pig	4.80567e-306	3.78201	409	57	1.75623e-301	Up-regulated
TRIM54	Pig	6.06402e-306	2.28877	696	289	2.2161e-301	Up-regulated
GRIA1	Pig	2.90627e-302	2.81442	516	118	1.0621e-297	Up-regulated
ENSSSCG00000003079	Pig	1.64261e-298	8.56571	278	2	6.00292e-294	Up-regulated
SYNPO2L	Pig	2.09907e-296	2.68559	0.47	84	7.67105e-292	Up-regulated
PTP4A2	Pig	1.16889e-295	1.78312	756	365	4.27169e-291	Up-regulated
LGALS1	Pig	1.69318e-294	11.0931	269	0	6.18773e-290	Up-regulated
MACROD2	Pig	2.28987e-294	4.80579	0.36	39	8.36834e-290	Up-regulated
KLF6	Pig	5.96151e-294	5.7802	299	11	2.17863e-289	Up-regulated
GDAP2	Pig	2.26736e-285	3.63911	389	54	8.28607e-281	Up-regulated
NLRC5	Pig	1.91642e-279	5.40316	291	12	7.00356e-275	Up-regulated
ADGRG6	Pig	1.63698e-278	12.5016	255	0	5.98236e-274	Up-regulated
SRPK2	Pig	4.64255e-276	1.70507	772	398	1.69662e-271	Up-regulated
CRACDL	Pig	5.11347e-276	2.37828	481	0.1	1.86872e-271	Up-regulated
GCNT3	Pig	2.4247e-275	7.06538	263	4	8.86106e-271	Up-regulated
CCDC180	Pig	1.08483e-272	4.61976	297	15	3.9645e-268	Up-regulated
CCDC85A	Pig	4.63728e-268	2.21284	0.63	248	1.6947e-263	Up-regulated
HSPB3	Pig	5.36283e-266	2.42944	516	137	1.95985e-261	Up-regulated
NUFIP2	Pig	1.86395e-265	2.33695	529	148	6.81179e-261	Up-regulated
NPAS3	Pig	1.20415e-263	3.72743	366	51	4.40058e-259	Up-regulated
SNAPC1	Pig	1.50368e-263	3.02661	446	96	5.49521e-259	Up-regulated
ENSSSCG00000014540	Pig	1.83358e-261	3.51439	364	0.05	6.70082e-257	Up-regulated
NRP1	Pig	1.86951e-258	2.07082	617	234	6.83213e-254	Up-regulated
GIPC2	Pig	2.32924e-258	2.26605	0.58	193	8.5122e-254	Up-regulated
TSC22D2	Pig	3.24633e-257	1.89861	691	319	1.18637e-252	Up-regulated
RBMS1	Pig	1.32198e-256	1.9346	637	268	4.83119e-252	Up-regulated
DPY19L1	Pig	1.74266e-255	2.45127	517	149	6.36855e-251	Up-regulated
ACAP2	Pig	1.92128e-255	2.52199	538	174	7.02133e-251	Up-regulated
DZIP3	Pig	1.20482e-253	2.1152	533	154	4.40301e-249	Up-regulated
SLCO4C1	Pig	3.26894e-253	12.4693	234	0	1.19463e-248	Up-regulated
IFIT5	Pig	1.57624e-251	4.79405	277	16	5.76035e-247	Up-regulated
TMEM159	Pig	4.16617e-251	3.1943	0.35	45	1.52253e-246	Up-regulated
CMAS	Pig	2.25458e-249	4.96789	267	12	8.23935e-245	Up-regulated
SLC9A9	Pig	5.43447e-249	3.90549	308	29	1.98603e-244	Up-regulated
TTLL11	Pig	4.86516e-248	3.26535	336	39	1.77797e-243	Up-regulated
PTGER3	Pig	5.75217e-248	1.43097	843	623	2.10213e-243	Up-regulated
ENSSSCG00000045769	Pig	6.76441e-248	9.53429	231	1	2.47205e-243	Up-regulated
PELI2	Pig	1.01309e-247	5.80542	246	5	3.70234e-243	Up-regulated
HIF1A	Pig	1.17862e-247	2.6825	455	109	4.30728e-243	Up-regulated
CPEB4	Pig	3.85281e-247	1.27886	837	0.57	1.40801e-242	Up-regulated
ZCCHC24	Pig	4.14737e-247	2.48925	481	126	1.51566e-242	Up-regulated
DDIT4	Pig	1.39714e-244	4.28032	302	29	5.10584e-240	Up-regulated
PPP1R3C	Pig	8.78745e-244	2.86487	0.37	57	3.21137e-239	Up-regulated
IL10RA	Pig	2.19885e-243	5.62133	251	8	8.03571e-239	Up-regulated
TXNIP	Pig	4.1043e-243	1.97832	573	202	1.49992e-238	Up-regulated
TMEM65	Pig	8.17826e-242	1.34764	837	545	2.98874e-237	Up-regulated
ASCC3	Pig	1.42896e-241	2.01786	567	194	5.22213e-237	Up-regulated
ATP2B4	Pig	1.81178e-241	1.49606	759	377	6.62114e-237	Up-regulated
ENSSSCG00000009341	Pig	2.05838e-240	1.44841	779	438	7.52237e-236	Up-regulated
RASAL2	Pig	1.55005e-239	2.77405	409	86	5.66465e-235	Up-regulated
ENSSSCG00000031661	Pig	3.52135e-239	5.67233	249	9	1.28688e-234	Up-regulated
CHIC2	Pig	8.70523e-239	2.43535	0.49	143	3.18133e-234	Up-regulated
CPM	Pig	2.87582e-236	5.40796	0.25	0.01	1.05097e-231	Up-regulated
BHLHE40	Pig	9.49012e-235	5.05185	242	7	3.46816e-230	Up-regulated
EXOC6B	Pig	2.01815e-233	1.21865	844	593	7.37532e-229	Up-regulated
STAC2	Pig	2.52162e-233	5.97075	235	6	9.21526e-229	Up-regulated
SLC1A2	Pig	1.91834e-231	2.15097	509	0.15	7.01057e-227	Up-regulated
TMEM117	Pig	4.2256e-230	3.65694	311	36	1.54425e-225	Up-regulated
HECTD4	Pig	4.87454e-230	1.54128	773	449	1.7814e-225	Up-regulated
TTC14	Pig	1.05592e-229	2.01691	559	201	3.85886e-225	Up-regulated
ITGB1	Pig	9.67116e-229	1.77408	658	301	3.53433e-224	Up-regulated
MAML2	Pig	2.52041e-228	2.89705	403	88	9.21085e-224	Up-regulated
LMOD2	Pig	2.61441e-228	1.30924	832	567	9.55436e-224	Up-regulated
DYSF	Pig	1.05046e-226	1.94302	608	236	3.83891e-222	Up-regulated
RANBP17	Pig	1.10645e-225	3.32991	0.33	49	4.04351e-221	Up-regulated
UBB	Pig	1.33142e-225	4.29382	268	0.02	4.86567e-221	Up-regulated
PURG	Pig	1.40306e-225	3.31737	341	54	5.12746e-221	Up-regulated
HECTD2	Pig	1.92746e-225	4.16947	271	22	7.0439e-221	Up-regulated
ENSSSCG00000021656	Pig	3.50328e-225	2.20378	588	235	1.28027e-220	Up-regulated
EGLN3	Pig	9.15218e-225	2.82199	351	57	3.34466e-220	Up-regulated
CHCHD10	Pig	2.74227e-224	2.17471	489	0.14	1.00216e-219	Up-regulated
ATP5MC1	Pig	1.17492e-222	2.59343	384	74	4.29376e-218	Up-regulated
C2CD6	Pig	1.52758e-221	3.09778	0.34	54	5.58256e-217	Up-regulated
RPL10	Pig	2.00389e-221	3.26494	325	47	7.32322e-217	Up-regulated
AAK1	Pig	2.11966e-221	1.06127	883	665	7.74628e-217	Up-regulated
KCNMA1	Pig	4.55839e-221	1.71149	591	0.22	1.66586e-216	Up-regulated
RPS15	Pig	1.14968e-220	3.23922	321	46	4.20149e-216	Up-regulated
STRADB	Pig	1.73298e-218	1.46895	723	388	6.33317e-214	Up-regulated
SLCO3A1	Pig	1.79701e-218	1.14296	894	669	6.56716e-214	Up-regulated
DENND5B	Pig	1.66774e-216	1.10533	922	746	6.09477e-212	Up-regulated
ACTB	Pig	7.25181e-216	2.64889	358	64	2.65017e-211	Up-regulated
STX12	Pig	1.42702e-215	2.69258	397	89	5.21504e-211	Up-regulated
DNAJB4	Pig	1.43344e-215	1.17625	869	648	5.23852e-211	Up-regulated
1 COP	Pig	4.78147e-215	2.06618	0.52	0.18	1.74739e-210	Up-regulated
USP34	Pig	4.69726e-214	1.46945	729	415	1.71661e-209	Up-regulated
WSB1	Pig	8.18705e-214	2.68179	0.43	117	2.99196e-209	Up-regulated
HSD17B12	Pig	5.21289e-213	2.35642	414	97	1.90505e-208	Up-regulated
ROCK2	Pig	2.98214e-212	1.3523	862	659	1.08982e-207	Up-regulated
OLA1	Pig	1.05149e-211	2.55418	367	0.07	3.84265e-207	Up-regulated
CTNND1	Pig	1.28841e-211	2.07618	511	0.17	4.70849e-207	Up-regulated
NUDCD1	Pig	1.82008e-211	2.60011	378	78	6.65149e-207	Up-regulated
ENSSSCG00000007692	Pig	3.60141e-211	2.50368	0.38	79	1.31613e-206	Up-regulated
ANKRD2	Pig	5.06264e-211	6.08651	208	3	1.85014e-206	Up-regulated
SLC35A1	Pig	1.05356e-210	2.36565	417	101	3.85023e-206	Up-regulated
ITGAV	Pig	2.78441e-210	1.84755	579	225	1.01756e-205	Up-regulated
SORBS2	Pig	2.769e-209	0.648973	988	976	1.01193e-204	Up-regulated
SMPX	Pig	2.89554e-209	1.71047	595	232	1.05818e-204	Up-regulated
TMEM260	Pig	3.44594e-209	2.35555	432	114	1.25932e-204	Up-regulated
SLC39A10	Pig	3.64167e-209	2.76008	364	72	1.33085e-204	Up-regulated
PHKB	Pig	4.06891e-209	1.72141	638	298	1.48698e-204	Up-regulated
ZNF654	Pig	5.62605e-208	1.38275	0.78	504	2.05604e-203	Up-regulated
CRYM	Pig	3.07614e-205	8.68278	193	0	1.12418e-200	Up-regulated
RPL37A	Pig	1.59535e-204	3.52666	272	29	5.83021e-200	Up-regulated
TASOR	Pig	4.25679e-204	2.80875	347	66	1.55564e-199	Up-regulated
CMPK2	Pig	1.00821e-203	11.4604	0.19	0	3.68451e-199	Up-regulated
CDIN1	Pig	3.21756e-203	1.94878	514	173	1.17586e-198	Up-regulated
TLL2	Pig	3.07177e-202	4.65511	224	11	1.12258e-197	Up-regulated
BTBD1	Pig	4.09882e-201	1.69866	599	0.25	1.49791e-196	Up-regulated
BACE2	Pig	6.86373e-200	2.67168	367	77	2.50835e-195	Up-regulated
RNLS	Pig	1.85209e-199	2.75493	333	59	6.76847e-195	Up-regulated
LONRF3	Pig	2.32457e-199	7.13332	195	2	8.49515e-195	Up-regulated
CALU	Pig	5.95179e-199	2.08415	476	152	2.17508e-194	Up-regulated
XKR6	Pig	6.18375e-199	1.87868	519	0.18	2.25985e-194	Up-regulated
RIMS1	Pig	6.78021e-198	1.52026	715	414	2.47783e-193	Up-regulated
PEAK1	Pig	1.32879e-197	1.43885	698	378	4.85608e-193	Up-regulated
RRP15	Pig	2.43479e-197	2.15392	451	131	8.89793e-193	Up-regulated
C3orf38	Pig	7.01494e-197	3.27969	0.29	41	2.56361e-192	Up-regulated
AEBP2	Pig	1.06209e-196	1.99281	548	216	3.88142e-192	Up-regulated
TPM1	Pig	3.36548e-195	1.12865	855	651	1.22991e-190	Up-regulated
KLHL32	Pig	2.61947e-194	2.05708	455	136	9.57285e-190	Up-regulated
CYP20A1	Pig	6.11641e-194	1.64862	595	263	2.23524e-189	Up-regulated
FRZB	Pig	1.39012e-193	5.88389	197	5	5.08019e-189	Up-regulated
NAALAD2	Pig	2.53778e-193	2.64943	319	55	9.27433e-189	Up-regulated
RGS7	Pig	2.23672e-192	1.32374	678	308	8.17409e-188	Up-regulated
PGGT1B	Pig	7.40667e-192	2.12347	499	179	2.70677e-187	Up-regulated
VMP1	Pig	8.26033e-192	2.19592	463	0.15	3.01874e-187	Up-regulated
SERPINB2	Pig	2.57952e-191	4.1469	233	18	9.42686e-187	Up-regulated
SGCD	Pig	3.48128e-191	1.06318	915	844	1.27223e-186	Up-regulated
PICALM	Pig	6.21006e-191	1.6454	0.61	293	2.26947e-186	Up-regulated
MYL3	Pig	6.48331e-190	1.74344	618	297	2.36933e-185	Up-regulated
PPP3CA	Pig	1.38402e-189	2.94982	313	57	5.0579e-185	Up-regulated
DYNC1I1	Pig	2.52725e-189	1.17506	827	563	9.23582e-185	Up-regulated
RAP1A	Pig	7.50067e-189	1.41446	722	411	2.74112e-184	Up-regulated
ATP5IF1	Pig	1.08629e-188	3.50789	263	32	3.96986e-184	Up-regulated
RPS20	Pig	2.18319e-188	4.82255	209	0.01	7.97849e-184	Up-regulated
ITIH4	Pig	5.95874e-188	8.82185	178	0	2.17762e-183	Up-regulated
ANKRD12	Pig	8.85538e-188	1.37873	707	407	3.2362e-183	Up-regulated
SEPTIN11	Pig	2.32357e-187	3.29685	288	44	8.49149e-183	Up-regulated
ENSSSCG00000050955	Pig	2.48589e-187	3.58253	0.25	26	9.0847e-183	Up-regulated
MLLT11	Pig	8.85865e-187	3.64832	231	19	3.23739e-182	Up-regulated
HERC5	Pig	2.84934e-185	7.00379	178	1	1.04129e-180	Up-regulated
CEP112	Pig	1.31565e-184	2.93229	0.33	0.07	4.80805e-180	Up-regulated
UBC	Pig	1.8632e-184	2.35146	384	96	6.80906e-180	Up-regulated
IFIT2	Pig	4.14411e-184	8.4533	176	1	1.51447e-179	Up-regulated
TRANK1	Pig	8.42198e-184	3.152	278	0.04	3.07781e-179	Up-regulated
REXO2	Pig	2.19808e-183	3.14175	273	38	8.03288e-179	Up-regulated
DIAPH2	Pig	1.87628e-182	0.823277	0.92	866	6.85685e-178	Up-regulated
DNAJB1	Pig	2.75203e-182	3.38828	258	31	1.00573e-177	Up-regulated
UBR1	Pig	9.2805e-182	1.65243	591	266	3.39156e-177	Up-regulated
TXNRD1	Pig	4.18183e-181	2.18452	0.41	114	1.52825e-176	Up-regulated
SPRED1	Pig	8.43616e-180	2.57723	328	68	3.083e-175	Up-regulated
PAG1	Pig	1.7428e-179	1.91491	492	171	6.36908e-175	Up-regulated
SLMAP	Pig	4.65499e-179	1.00899	848	0.64	1.70116e-174	Up-regulated
CPNE1	Pig	1.00056e-178	1.95055	477	165	3.65653e-174	Up-regulated
FOXS1	Pig	3.88668e-178	11.5585	168	0	1.42039e-173	Up-regulated
NFKB1	Pig	3.85855e-177	1.65488	584	259	1.41011e-172	Up-regulated
GJA1	Pig	5.62045e-177	1.42929	0.68	368	2.054e-172	Up-regulated
MTR	Pig	1.45314e-176	3.05019	289	0.05	5.3105e-172	Up-regulated
CDC42BPA	Pig	5.33152e-175	1.3406	694	401	1.9484e-170	Up-regulated
COX7C	Pig	7.59986e-175	1.82568	507	189	2.77737e-170	Up-regulated
ERO1A	Pig	2.2903e-174	2.66524	418	135	8.3699e-170	Up-regulated
RBPJ	Pig	8.45355e-174	2.40227	331	74	3.08935e-169	Up-regulated
SPTBN1	Pig	5.38397e-173	0.687019	0.93	868	1.96757e-168	Up-regulated
CYFIP2	Pig	1.00804e-172	3.68233	226	22	3.68387e-168	Up-regulated
CLIP1	Pig	2.21217e-172	1.13298	801	0.54	8.08439e-168	Up-regulated
BST2	Pig	1.08743e-171	8.66418	163	0	3.974e-167	Up-regulated
GYG1	Pig	4.59178e-171	2.1716	391	0.11	1.67807e-166	Up-regulated
ADAR	Pig	6.01538e-171	3.0529	268	0.04	2.19832e-166	Up-regulated
RAB3B	Pig	1.00996e-170	6.90228	166	2	3.69092e-166	Up-regulated
TIAM2	Pig	1.15115e-169	2.55664	333	74	4.20687e-165	Up-regulated
PLPP1	Pig	1.25779e-169	1.40392	713	434	4.59658e-165	Up-regulated
RPL31	Pig	1.8645e-169	3.39189	243	31	6.8138e-165	Up-regulated
ENSSSCG00000008451	Pig	4.36366e-169	1.43994	0.67	374	1.5947e-164	Up-regulated
RHOQ	Pig	1.49921e-168	1.53435	623	297	5.47886e-164	Up-regulated
ENSSSCG00000031798	Pig	2.81869e-168	5.82567	171	4	1.03009e-163	Up-regulated
ENSSSCG00000028850	Pig	3.33392e-168	5.07429	177	5	1.21838e-163	Up-regulated
FYN	Pig	5.20176e-168	2.72819	308	65	1.90098e-163	Up-regulated
VPS13B	Pig	4.70301e-167	1.33045	689	407	1.71871e-162	Up-regulated
KLF7	Pig	3.15112e-166	3.68402	217	21	1.15158e-161	Up-regulated
UTRN	Pig	4.3125e-165	1.36096	693	429	1.576e-160	Up-regulated
CCSER2	Pig	1.5178e-164	1.13329	754	486	5.54681e-160	Up-regulated
PRMT3	Pig	2.0582e-164	2.20556	375	103	7.52169e-160	Up-regulated
MAP3K20	Pig	5.60592e-164	1.49123	739	469	2.04868e-159	Up-regulated
ZCCHC7	Pig	6.46432e-164	1.25976	0.71	419	2.36239e-159	Up-regulated
TCF12	Pig	1.16266e-163	0.909527	847	683	4.24893e-159	Up-regulated
MYO5A	Pig	3.4615e-163	1.65032	538	227	1.26501e-158	Up-regulated
ZNF782	Pig	1.7701e-162	2.31222	303	0.06	6.46884e-158	Up-regulated
ENSSSCG00000036227	Pig	2.93202e-162	2.08922	388	114	1.07151e-157	Up-regulated
TGFB2	Pig	5.23895e-162	5.46254	0.17	5	1.91457e-157	Up-regulated
ENSSSCG00000039582	Pig	5.30798e-162	2.62895	282	52	1.9398e-157	Up-regulated
MGST3	Pig	1.41545e-161	2.36122	285	52	5.17275e-157	Up-regulated
PHF14	Pig	4.63676e-161	1.79671	462	165	1.6945e-156	Up-regulated
ENSSSCG00000039723	Pig	5.98953e-160	2.70453	256	39	2.18887e-155	Up-regulated
TGM2	Pig	1.12793e-159	1.40729	529	206	4.12203e-155	Up-regulated
FLNC	Pig	1.49432e-158	1.53057	583	263	5.461e-154	Up-regulated
RPS27A	Pig	2.05255e-158	3.06134	244	36	7.50104e-154	Up-regulated
PDE7B	Pig	5.8668e-158	8.71177	0.15	0	2.14402e-153	Up-regulated
SETX	Pig	7.88207e-158	2.29627	339	87	2.8805e-153	Up-regulated
HNRNPDL	Pig	1.00995e-157	1.60681	517	217	3.69088e-153	Up-regulated
CCN2	Pig	1.44981e-157	6.87339	158	3	5.29832e-153	Up-regulated
UCK2	Pig	3.05737e-157	1.96154	399	0.12	1.11732e-152	Up-regulated
TMCC1	Pig	2.30225e-156	1.15616	771	0.52	8.41358e-152	Up-regulated
ENSSSCG00000012427	Pig	6.39266e-156	5.51667	163	5	2.3362e-151	Up-regulated
PSMD14	Pig	1.2839e-155	1.68809	436	145	4.69202e-151	Up-regulated
POPDC2	Pig	2.32734e-155	2.66647	266	46	8.50527e-151	Up-regulated
COL4A5	Pig	4.56476e-155	2.70271	0.26	44	1.66819e-150	Up-regulated
RGL1	Pig	1.10956e-154	4.89599	163	5	4.0549e-150	Up-regulated
KSR1	Pig	1.72481e-154	3.93128	201	19	6.30331e-150	Up-regulated
LRRIQ3	Pig	3.06481e-154	2.24079	316	73	1.12003e-149	Up-regulated
LRRFIP2	Pig	9.45976e-154	0.892613	864	0.76	3.45707e-149	Up-regulated
DOCK7	Pig	2.12837e-153	1.98621	421	147	7.77812e-149	Up-regulated
RPS28	Pig	1.06473e-152	3.23939	231	32	3.89104e-148	Up-regulated
PML	Pig	1.57578e-152	3.14795	226	0.03	5.75868e-148	Up-regulated
ENSSSCG00000026960	Pig	1.70848e-152	1.23794	697	0.41	6.24363e-148	Up-regulated
ENSSSCG00000013366	Pig	2.42802e-152	6.23691	154	3	8.87322e-148	Up-regulated
ENSSSCG00000017791	Pig	2.94367e-152	3.14949	247	0.04	1.07577e-147	Up-regulated
ZNFX1	Pig	4.18897e-152	2.94058	231	32	1.53086e-147	Up-regulated
TECTA	Pig	1.01088e-151	2.13218	0.33	81	3.69428e-147	Up-regulated
GNAQ	Pig	7.32711e-151	2.15714	364	111	2.67769e-146	Up-regulated
NKAIN2	Pig	1.06538e-150	3.80958	226	31	3.89345e-146	Up-regulated
PCSK5	Pig	8.83553e-150	1.71406	512	216	3.22894e-145	Up-regulated
RPL24	Pig	5.78853e-149	2.69523	267	51	2.11542e-144	Up-regulated
MMP23B	Pig	1.04706e-148	5.40629	158	5	3.82648e-144	Up-regulated
CDYL2	Pig	1.0954e-148	4.70909	171	9	4.00314e-144	Up-regulated
PSMC6	Pig	1.12917e-148	1.36824	569	264	4.12655e-144	Up-regulated
PEX7	Pig	1.52097e-148	2.88826	242	38	5.55839e-144	Up-regulated
SLC44A2	Pig	1.72213e-148	3.54731	212	25	6.29351e-144	Up-regulated
ARHGEF3	Pig	1.97268e-148	2.49425	329	87	7.20917e-144	Up-regulated
ENSSSCG00000022032	Pig	2.37985e-148	2.35958	309	73	8.69715e-144	Up-regulated
BMP1	Pig	2.8266e-147	4.05714	188	16	1.03298e-142	Up-regulated
ZC3H6	Pig	3.41411e-147	1.85989	428	0.15	1.24769e-142	Up-regulated
MED13L	Pig	5.01153e-147	0.871641	839	691	1.83146e-142	Up-regulated
MMD	Pig	5.8628e-147	1.58231	516	222	2.14256e-142	Up-regulated
SRSF12	Pig	7.10735e-147	3.08892	219	29	2.59738e-142	Up-regulated
PRR16	Pig	1.32646e-146	1.09975	765	501	4.84753e-142	Up-regulated
SH3D19	Pig	2.49027e-146	4.56147	154	5	9.10071e-142	Up-regulated
MX2	Pig	3.81694e-146	11.7371	139	0	1.3949e-141	Up-regulated
GALNT1	Pig	7.80641e-146	3.00013	231	36	2.85285e-141	Up-regulated
CASP10	Pig	1.08993e-145	6.29893	146	2	3.98315e-141	Up-regulated
ZNF800	Pig	2.27542e-145	2.2705	327	85	8.31551e-141	Up-regulated
SLC25A24	Pig	2.4417e-145	9.81298	139	0	8.92321e-141	Up-regulated
RPL11	Pig	8.84349e-145	2.99179	221	0.03	3.23185e-140	Up-regulated
ENO1	Pig	1.01648e-144	1.6582	417	141	3.71473e-140	Up-regulated
SPI1	Pig	1.41883e-144	3.58199	199	21	5.18511e-140	Up-regulated
NDUFA4	Pig	1.86019e-144	1.59684	541	248	6.79807e-140	Up-regulated
SNX14	Pig	2.41291e-144	1.70492	442	165	8.81797e-140	Up-regulated
ENSSSCG00000013436	Pig	2.51999e-144	2.75918	0.26	0.05	9.20931e-140	Up-regulated
MICOS13	Pig	3.93677e-144	4.84525	158	7	1.43869e-139	Up-regulated
FLT1	Pig	4.95951e-144	5.62002	144	2	1.81245e-139	Up-regulated
RAD51B	Pig	6.25019e-144	1.37194	564	261	2.28413e-139	Up-regulated
AGPS	Pig	8.68709e-144	1.61352	466	0.18	3.1747e-139	Up-regulated
MRTFA	Pig	1.95095e-143	2.28827	317	82	7.12973e-139	Up-regulated
ELOVL5	Pig	2.44038e-143	2.1296	344	97	8.91837e-139	Up-regulated
MMP25	Pig	4.63678e-143	8.54176	137	0	1.69451e-138	Up-regulated
ACTR3	Pig	5.72771e-143	2.37963	316	83	2.09319e-138	Up-regulated
RPL18	Pig	1.52332e-142	2.89909	224	32	5.56697e-138	Up-regulated
TNNC1	Pig	2.07905e-142	1.58632	631	354	7.5979e-138	Up-regulated
SLC38A9	Pig	2.16363e-142	2.49123	284	64	7.907e-138	Up-regulated
PLGRKT	Pig	4.82256e-142	1.63891	429	151	1.76241e-137	Up-regulated
ABHD6	Pig	1.07015e-141	2.47854	281	61	3.91086e-137	Up-regulated
KTN1	Pig	1.58096e-141	1.30229	635	354	5.77763e-137	Up-regulated
MTHFD2L	Pig	2.56327e-141	1.43631	513	222	9.36747e-137	Up-regulated
SS18	Pig	6.65922e-141	1.66009	498	217	2.43361e-136	Up-regulated
ENSSSCG00000029830	Pig	4.72603e-140	3.51593	191	0.02	1.72713e-135	Up-regulated
SEPTIN8	Pig	9.06501e-140	3.07214	213	29	3.31281e-135	Up-regulated
CD274	Pig	9.56776e-140	2.66377	237	0.04	3.49654e-135	Up-regulated
SH3RF2	Pig	1.10126e-139	4.96662	158	8	4.02455e-135	Up-regulated
NABP1	Pig	1.10724e-139	2.85264	234	39	4.04642e-135	Up-regulated
ARFIP1	Pig	2.10748e-139	1.48934	523	233	7.70179e-135	Up-regulated
TTC39A	Pig	1.252e-138	4.76602	148	5	4.57542e-134	Up-regulated
1,00 AMD	Pig	1.59574e-138	1.21043	598	296	5.83164e-134	Up-regulated
UQCR10	Pig	2.39867e-138	2.40824	253	47	8.76592e-134	Up-regulated
PLSCR1	Pig	2.53247e-138	4.11564	167	11	9.2549e-134	Up-regulated
CERS6	Pig	4.90993e-138	3.85706	192	22	1.79433e-133	Up-regulated
H2AC6	Pig	6.0114e-138	4.32897	172	13	2.19687e-133	Up-regulated
INTS6	Pig	5.88728e-137	2.24782	313	84	2.15151e-132	Up-regulated
SSR3	Pig	8.66042e-137	2.92332	224	36	3.16495e-132	Up-regulated
TIPARP	Pig	1.1069e-136	2.31846	297	72	4.04517e-132	Up-regulated
LHFPL6	Pig	2.30706e-136	1.74466	379	125	8.43115e-132	Up-regulated
ERICH6	Pig	9.57597e-136	4.78035	146	5	3.49954e-131	Up-regulated
TUT4	Pig	2.6543e-135	0.906579	853	675	9.70012e-131	Up-regulated
DAPK3	Pig	2.7116e-135	1.93004	315	82	9.90956e-131	Up-regulated
RSRC1	Pig	6.93409e-135	1.7506	407	146	2.53406e-130	Up-regulated
KIAA0825	Pig	1.05201e-134	2.06052	328	93	3.84458e-130	Up-regulated
SCRN3	Pig	1.11532e-134	2.73752	217	32	4.07595e-130	Up-regulated
GPR161	Pig	1.28843e-134	1.67978	485	219	4.70857e-130	Up-regulated
KATNBL1	Pig	1.37619e-134	1.30085	565	268	5.02929e-130	Up-regulated
STK3	Pig	1.43805e-134	1.50739	535	263	5.25534e-130	Up-regulated
MGAT5	Pig	1.97919e-134	1.14435	763	514	7.23296e-130	Up-regulated
XPO6	Pig	5.44691e-134	2.01689	376	124	1.99057e-129	Up-regulated
ENSSSCG00000036556	Pig	5.62201e-134	2.9717	211	0.03	2.05457e-129	Up-regulated
FRMD4A	Pig	9.78797e-134	4.52389	144	5	3.57701e-129	Up-regulated
RPL29	Pig	1.27435e-133	3.43233	175	16	4.65711e-129	Up-regulated
EPB41L3	Pig	3.79011e-133	0.848181	883	738	1.3851e-128	Up-regulated
LIPA	Pig	5.00148e-133	2.52575	253	52	1.82779e-128	Up-regulated
DDHD1	Pig	9.8133e-133	2.37561	281	67	3.58627e-128	Up-regulated
GPHN	Pig	2.85396e-132	0.787317	872	746	1.04298e-127	Up-regulated
SEC61G	Pig	3.1379e-132	2.5731	238	44	1.14674e-127	Up-regulated
FGFR1OP2	Pig	6.37287e-132	2.32626	266	58	2.32897e-127	Up-regulated
ST3GAL6	Pig	3.45022e-131	2.3881	253	52	1.26088e-126	Up-regulated
ENSSSCG00000014280	Pig	6.44362e-131	1.58885	448	181	2.35482e-126	Up-regulated
PARP9	Pig	8.38022e-131	7.64621	128	1	3.06255e-126	Up-regulated
ENSSSCG00000013889	Pig	2.03953e-130	3.82032	162	12	7.45347e-126	Up-regulated
HSD11B1L	Pig	3.31847e-130	2.90134	209	32	1.21273e-125	Up-regulated
RUBCN	Pig	3.98453e-130	1.96269	323	0.09	1.45615e-125	Up-regulated
MAPT	Pig	5.47177e-130	1.66657	381	125	1.99966e-125	Up-regulated
FNDC3B	Pig	1.06279e-129	0.723498	885	771	3.88395e-125	Up-regulated
ENSSSCG00000024973	Pig	1.19551e-129	4.41907	0.15	8	4.36899e-125	Up-regulated
ADAMTS20	Pig	1.35209e-129	4.82036	0.16	12	4.94122e-125	Up-regulated
NCOA7	Pig	2.80956e-129	6.85712	129	2	1.02675e-124	Up-regulated
EPB41L1	Pig	5.31146e-129	1.61848	386	0.13	1.94107e-124	Up-regulated
SAMD12	Pig	7.45255e-129	1.11391	787	579	2.72353e-124	Up-regulated
TMEM245	Pig	8.86544e-129	1.26914	692	444	3.23987e-124	Up-regulated
CMAH	Pig	1.06075e-128	5.9464	136	4	3.87651e-124	Up-regulated
ARHGEF2	Pig	2.50253e-128	2.93752	244	0.05	9.1455e-124	Up-regulated
MAPK9	Pig	2.54523e-128	2.37928	273	64	9.30156e-124	Up-regulated
SLC10A7	Pig	7.24966e-128	1.56356	372	0.12	2.64939e-123	Up-regulated
ZNF664	Pig	9.60067e-128	1.20021	593	306	3.50856e-123	Up-regulated
PIGF	Pig	4.15478e-127	2.67105	212	34	1.51837e-122	Up-regulated
SETDB2	Pig	8.03652e-127	2.24262	246	0.05	2.93695e-122	Up-regulated
PHC3	Pig	1.07711e-126	1.23534	636	371	3.93629e-122	Up-regulated
SEMA6D	Pig	2.16969e-126	4.10469	158	12	7.92913e-122	Up-regulated
MRPS9	Pig	2.44026e-126	1.67923	384	132	8.91792e-122	Up-regulated
RNF144B	Pig	9.45411e-126	2.40404	265	62	3.45501e-121	Up-regulated
SYCP2	Pig	1.07161e-125	1.49816	393	0.14	3.91618e-121	Up-regulated
ALCAM	Pig	1.85054e-125	1.76866	367	125	6.76278e-121	Up-regulated
ENSSSCG00000034015	Pig	2.15234e-125	1.71075	0.4	143	7.86574e-121	Up-regulated
POLK	Pig	3.20046e-125	1.70166	366	122	1.16961e-120	Up-regulated
UBE3A	Pig	3.67453e-125	1.06572	716	475	1.34286e-120	Up-regulated
1,00 STN	Pig	6.2364e-125	2.84385	217	38	2.27909e-120	Up-regulated
GLB1	Pig	8.38146e-125	1.13458	632	0.34	3.06301e-120	Up-regulated
XPR1	Pig	1.07194e-124	1.49929	0.47	203	3.91742e-120	Up-regulated
IL34	Pig	2.08596e-124	1.59733	477	209	7.62316e-120	Up-regulated
BMPR2	Pig	6.181e-124	1.2308	632	0.35	2.25885e-119	Up-regulated
RUNDC3B	Pig	7.84053e-124	2.57503	232	45	2.86532e-119	Up-regulated
PLIN2	Pig	8.03438e-124	3.27358	181	22	2.93617e-119	Up-regulated
TRIM21	Pig	9.3544e-124	6.17498	127	3	3.41857e-119	Up-regulated
ENSSSCG00000017164	Pig	1.17387e-123	3.03129	201	31	4.2899e-119	Up-regulated
TUT7	Pig	1.1146e-122	2.14944	288	79	4.07332e-118	Up-regulated
AZIN1	Pig	3.35389e-122	1.99535	366	129	1.22568e-117	Up-regulated
TUSC3	Pig	3.78454e-122	1.60235	353	114	1.38306e-117	Up-regulated
FUT8	Pig	5.59841e-122	2.74541	219	41	2.04594e-117	Up-regulated
BZW2	Pig	5.67469e-122	1.37698	501	231	2.07382e-117	Up-regulated
FAM172A	Pig	1.95864e-121	1.31948	572	308	7.15783e-117	Up-regulated
CCNB1IP1	Pig	2.0295e-121	2.22495	219	39	7.41682e-117	Up-regulated
MORC3	Pig	2.53952e-121	2.05828	279	71	9.28068e-117	Up-regulated
DMXL1	Pig	2.67634e-121	1.21219	645	382	9.78068e-117	Up-regulated
AP3M1	Pig	4.34741e-121	1.53093	419	166	1.58876e-116	Up-regulated
ENSSSCG00000016646	Pig	5.38439e-121	1.37895	0.51	239	1.96772e-116	Up-regulated
RPL37	Pig	9.11406e-121	3.95109	149	11	3.33073e-116	Up-regulated
FYTTD1	Pig	2.74255e-120	1.40812	487	211	1.00226e-115	Up-regulated
UBAC2	Pig	3.7249e-120	1.70373	0.38	137	1.36127e-115	Up-regulated
TMEM68	Pig	8.07601e-120	2.30435	248	55	2.95138e-115	Up-regulated
ENSSSCG00000035811	Pig	1.07211e-119	3.97498	156	14	3.91804e-115	Up-regulated
DTX3L	Pig	1.10206e-119	8.55444	115	0	4.02748e-115	Up-regulated
MCF2L2	Pig	1.70246e-119	4.05959	156	14	6.22163e-115	Up-regulated
IARS1	Pig	2.70311e-119	1.30226	577	311	9.8785e-115	Up-regulated
NES	Pig	3.19846e-119	10.9518	114	0	1.16888e-114	Up-regulated
TTC23	Pig	3.2977e-119	2.07726	304	88	1.20514e-114	Up-regulated
RASA1	Pig	5.45715e-119	1.36351	515	249	1.99431e-114	Up-regulated
DHRS4	Pig	1.96924e-118	2.66683	203	34	7.19658e-114	Up-regulated
PNPT1	Pig	2.58151e-118	2.20955	238	51	9.43411e-114	Up-regulated
ENSSSCG00000024974	Pig	3.29189e-118	2.60483	205	35	1.20302e-113	Up-regulated
ENSSSCG00000013880	Pig	4.75207e-118	4.95843	0.13	5	1.73665e-113	Up-regulated
AHR	Pig	5.11434e-118	1.49584	378	134	1.86903e-113	Up-regulated
ARL13B	Pig	5.45996e-118	1.63593	366	127	1.99534e-113	Up-regulated
CNKSR2	Pig	1.74397e-117	1.39776	517	255	6.37335e-113	Up-regulated
ENSSSCG00000033310	Pig	5.55674e-117	1.85826	345	116	2.03071e-112	Up-regulated
TTC3	Pig	8.07459e-117	1.45655	444	186	2.95086e-112	Up-regulated
EPSTI1	Pig	1.1725e-116	4.42309	136	8	4.28489e-112	Up-regulated
THOC6	Pig	1.2132e-116	4.02766	144	0.01	4.43363e-112	Up-regulated
MRPS30	Pig	1.3157e-116	2.07979	0.26	63	4.80824e-112	Up-regulated
CSTF3	Pig	1.42424e-116	1.84783	355	126	5.20488e-112	Up-regulated
KDM3A	Pig	2.47832e-116	1.65046	399	156	9.05703e-112	Up-regulated
KRAS	Pig	2.59089e-116	3.50221	167	0.02	9.46841e-112	Up-regulated
VPS8	Pig	3.92118e-116	1.41243	487	227	1.43299e-111	Up-regulated
PIP4K2A	Pig	4.99182e-116	2.73235	226	48	1.82426e-111	Up-regulated
CHSY1	Pig	8.93523e-116	3.89826	154	15	3.26538e-111	Up-regulated
GSR	Pig	1.06404e-115	2.5586	248	58	3.88855e-111	Up-regulated
PARP3	Pig	1.34797e-115	2.65471	193	0.03	4.92617e-111	Up-regulated
ENSSSCG00000002950	Pig	1.45528e-115	1.95751	358	126	5.31833e-111	Up-regulated
NDUFB5	Pig	2.74371e-115	1.57073	338	109	1.00269e-110	Up-regulated
SNX21	Pig	3.16886e-115	2.81406	204	36	1.15806e-110	Up-regulated
NBEA	Pig	9.25257e-115	1.36992	564	0.31	3.38135e-110	Up-regulated
MYL12A	Pig	1.48436e-114	2.02263	0.28	77	5.42461e-110	Up-regulated
FLNB	Pig	1.95032e-114	6.20059	118	3	7.12745e-110	Up-regulated
AP5M1	Pig	2.93535e-114	1.69359	299	86	1.07272e-109	Up-regulated
NEXN	Pig	4.47701e-114	0.649008	945	903	1.63612e-109	Up-regulated
ADAM19	Pig	9.22431e-114	3.764	0.16	18	3.37102e-109	Up-regulated
HSPA8	Pig	1.25012e-113	2.46122	213	41	4.56857e-109	Up-regulated
VTI1A	Pig	2.3742e-113	1.29023	518	0.25	8.67653e-109	Up-regulated
PAPOLA	Pig	4.62753e-113	1.30059	564	303	1.69113e-108	Up-regulated
AIMP1	Pig	9.18582e-113	1.42013	0.5	242	3.35696e-108	Up-regulated
LPIN1	Pig	1.09508e-112	1.15858	553	0.27	4.00197e-108	Up-regulated
CACNA2D1	Pig	1.15494e-112	0.842898	847	713	4.22073e-108	Up-regulated
IQCG	Pig	4.29063e-112	2.40698	0.21	0.04	1.56801e-107	Up-regulated
ENSSSCG00000008137	Pig	5.1864e-112	1.05845	705	459	1.89537e-107	Up-regulated
OSTF1	Pig	1.11229e-111	2.76989	192	32	4.06487e-107	Up-regulated
ABCD3	Pig	1.717e-111	1.32516	455	198	6.27476e-107	Up-regulated
LHFPL2	Pig	1.92486e-111	2.22534	0.28	82	7.03439e-107	Up-regulated
EPS15	Pig	1.92821e-111	1.45374	448	201	7.04665e-107	Up-regulated
SERGEF	Pig	2.32168e-111	2.43616	236	55	8.48457e-107	Up-regulated
AKAP7	Pig	3.22187e-111	2.12732	281	82	1.17743e-106	Up-regulated
MDM2	Pig	2.32141e-110	1.88095	335	116	8.48358e-106	Up-regulated
VPS13A	Pig	3.54887e-110	1.53201	419	178	1.29693e-105	Up-regulated
1 SOS	Pig	4.77417e-110	1.0074	702	473	1.74472e-105	Up-regulated
PPFIA2	Pig	8.29945e-110	1.71945	333	114	3.03303e-105	Up-regulated
ZMYM6	Pig	1.72414e-109	2.56745	206	0.04	6.30088e-105	Up-regulated
TEP1	Pig	2.06162e-109	3.53131	166	22	7.53418e-105	Up-regulated
SGCE	Pig	2.14065e-109	3.41589	158	19	7.82301e-105	Up-regulated
HLCS	Pig	2.17196e-109	2.66872	191	33	7.93741e-105	Up-regulated
MDH1	Pig	2.48121e-109	1.19846	447	189	9.0676e-105	Up-regulated
PJA2	Pig	6.33834e-109	1.17063	593	334	2.31635e-104	Up-regulated
RCOR1	Pig	8.89127e-109	1.81838	366	139	3.24932e-104	Up-regulated
NCOA1	Pig	2.44835e-108	1.10435	656	405	8.9475e-104	Up-regulated
FIGN	Pig	2.49946e-108	2.11106	233	54	9.13428e-104	Up-regulated
SLC25A4	Pig	3.49817e-108	0.969812	804	739	1.2784e-103	Up-regulated
VWA8	Pig	3.55945e-108	1.01392	791	569	1.3008e-103	Up-regulated
ENSSSCG00000004578	Pig	4.38838e-108	2.54945	224	51	1.60373e-103	Up-regulated
FKBP5	Pig	1.35651e-107	0.674432	873	748	4.95735e-103	Up-regulated
ARHGEF28	Pig	5.75083e-107	0.949695	0.8	616	2.10164e-102	Up-regulated
ATP5MC3	Pig	1.70199e-106	2.39456	184	0.03	6.21991e-102	Up-regulated
TNKS	Pig	1.8217e-106	1.07345	613	358	6.65739e-102	Up-regulated
ERBB3	Pig	2.83366e-106	3.40045	0.15	16	1.03556e-101	Up-regulated
RGS8	Pig	3.8112e-106	2.27147	219	48	1.3928e-101	Up-regulated
ADK	Pig	1.06257e-105	1.3666	415	173	3.88318e-101	Up-regulated
GADD45A	Pig	1.85823e-105	6.13039	111	3	6.79089e-101	Up-regulated
GPA33	Pig	2.2863e-105	4.37067	119	5	8.35529e-101	Up-regulated
CD2AP	Pig	4.48092e-105	2.17113	232	56	1.63755e-100	Up-regulated
HTATIP2	Pig	7.83796e-105	3.23075	143	14	2.86438e-100	Up-regulated
ZNRF3	Pig	1.02639e-104	1.62617	394	162	3.75093e-100	Up-regulated
C1orf21	Pig	1.78196e-104	0.68337	902	782	6.51217e-100	Up-regulated
FSTL3	Pig	5.70182e-104	3.17719	148	16	2.08373e-99	Up-regulated
ENSSSCG00000000530	Pig	8.61568e-104	1.02982	741	512	3.1486e-99	Up-regulated
NPSR1	Pig	1.26082e-103	2.05971	201	39	4.60767e-99	Up-regulated
B4GALT1	Pig	1.27357e-103	1.85956	324	113	4.65427e-99	Up-regulated
COX6A2	Pig	5.88843e-103	1.83756	286	88	2.15193e-98	Up-regulated
PAFAH2	Pig	6.9044e-103	2.11439	235	57	2.52321e-98	Up-regulated
USP15	Pig	1.62556e-102	1.15436	552	301	5.94063e-98	Up-regulated
FTL	Pig	2.65152e-102	2.70593	186	34	9.68998e-98	Up-regulated
ZNF106	Pig	2.81498e-102	0.895184	741	528	1.02873e-97	Up-regulated
MICU3	Pig	2.98776e-102	1.08154	574	316	1.09188e-97	Up-regulated
JAK2	Pig	4.11596e-102	1.58712	374	0.15	1.50418e-97	Up-regulated
USP6NL	Pig	4.73092e-102	2.16024	214	47	1.72891e-97	Up-regulated
DAG1	Pig	6.21683e-102	1.08669	637	373	2.27194e-97	Up-regulated
ENSSSCG00000000145	Pig	9.50097e-102	1.1942	555	293	3.47213e-97	Up-regulated
LZTS1	Pig	1.73821e-101	3.09757	153	19	6.3523e-97	Up-regulated
GBE1	Pig	1.87327e-101	1.19946	777	651	6.84587e-97	Up-regulated
CEBPG	Pig	2.26923e-101	3.27378	151	19	8.29289e-97	Up-regulated
NAMPT	Pig	5.75212e-101	1.23564	423	0.18	2.10211e-96	Up-regulated
ENSSSCG00000015027	Pig	6.16378e-101	3.03777	142	15	2.25255e-96	Up-regulated
CTSS	Pig	9.42456e-101	6.2407	0.1	1	3.44421e-96	Up-regulated
UBAP1	Pig	1.72355e-100	1.37118	469	225	6.29871e-96	Up-regulated
PSMA6	Pig	2.37747e-100	1.39407	366	142	8.68847e-96	Up-regulated
SLC16A12	Pig	3.3377e-100	10.6016	96	0	1.21976e-95	Up-regulated
KCNN2	Pig	5.41247e-100	1.02459	645	403	1.97799e-95	Up-regulated
VCAN	Pig	6.91035e-100	1.47244	349	133	2.52539e-95	Up-regulated
FOCAD	Pig	9.14311e-100	1.50988	375	153	3.34135e-95	Up-regulated
PPP1R21	Pig	1.28788e-99	1.9679	256	74	4.70655e-95	Up-regulated
RPL35	Pig	3.57359e-99	2.54641	184	35	1.30597e-94	Up-regulated
PDCD4	Pig	5.37054e-99	2.74376	191	39	1.96266e-94	Up-regulated
RPS8	Pig	6.2221e-99	2.85952	158	23	2.27386e-94	Up-regulated
SYNE2	Pig	7.0415e-99	2.27004	212	49	2.57331e-94	Up-regulated
KDM4C	Pig	1.25943e-98	1.01604	623	371	4.60257e-94	Up-regulated
ENSSSCG00000051311	Pig	2.12772e-98	2.98628	148	18	7.77574e-94	Up-regulated
TRAPPC13	Pig	3.52712e-98	1.65276	288	91	1.28899e-93	Up-regulated
RAP1B	Pig	3.66224e-98	1.49182	0.4	175	1.33837e-93	Up-regulated
ADGRL2	Pig	3.99985e-98	1.50367	381	161	1.46174e-93	Up-regulated
MSN	Pig	5.04077e-98	2.93846	156	23	1.84215e-93	Up-regulated
IGFBP2	Pig	5.39407e-98	7.73713	95	0	1.97126e-93	Up-regulated
REEP1	Pig	8.55446e-98	1.40924	406	0.17	3.12623e-93	Up-regulated
NCKAP1	Pig	1.02007e-97	1.03024	595	346	3.72783e-93	Up-regulated
ALDH1L2	Pig	1.44265e-97	10.1528	93	0	5.27216e-93	Up-regulated
SYNJ1	Pig	1.72864e-97	1.98201	254	73	6.31733e-93	Up-regulated
HERC1	Pig	2.72373e-97	1.05201	664	439	9.95387e-93	Up-regulated
VWA5A	Pig	4.96285e-97	5.27355	107	4	1.81367e-92	Up-regulated
IFNGR1	Pig	5.83855e-97	2.60896	183	35	2.1337e-92	Up-regulated
CDKL1	Pig	7.59468e-97	2.97764	0.17	29	2.77548e-92	Up-regulated
TUBB2B	Pig	9.99763e-97	3.63594	124	0.01	3.65363e-92	Up-regulated
PPP2R2A	Pig	1.9295e-96	1.33092	438	202	7.05135e-92	Up-regulated
CDK8	Pig	2.06388e-96	1.48207	371	0.15	7.54243e-92	Up-regulated
ADCY9	Pig	3.0552e-96	1.34256	412	177	1.11652e-91	Up-regulated
MLPH	Pig	3.1655e-96	1.27243	432	0.19	1.15683e-91	Up-regulated
CHD1L	Pig	4.1804e-96	1.30588	414	182	1.52773e-91	Up-regulated
ENAH	Pig	7.71005e-96	0.881112	803	623	2.81764e-91	Up-regulated
ENSSSCG00000001341	Pig	8.20112e-96	9.863	92	0	2.9971e-91	Up-regulated
NME2	Pig	9.33359e-96	2.74546	157	23	3.41096e-91	Up-regulated
PDK1	Pig	1.74706e-95	1.60581	0.32	117	6.38463e-91	Up-regulated
CCDC18	Pig	3.88212e-95	2.58202	179	34	1.41872e-90	Up-regulated
CACNA2D3	Pig	5.10029e-95	1.79253	268	83	1.8639e-90	Up-regulated
RPL7	Pig	6.06245e-95	4.12254	114	7	2.21552e-90	Up-regulated
TBCK	Pig	9.9198e-95	1.59915	341	131	3.62519e-90	Up-regulated
RAB9B	Pig	1.33985e-94	4.62046	106	5	4.89649e-90	Up-regulated
ACOT13	Pig	1.998e-94	1.16948	495	254	7.30169e-90	Up-regulated
HEATR5B	Pig	2.08038e-94	1.90983	0.24	67	7.60277e-90	Up-regulated
VEZF1	Pig	2.56794e-94	1.61519	298	102	9.38455e-90	Up-regulated
GCLC	Pig	3.62662e-94	3.14928	134	15	1.32535e-89	Up-regulated
ENSSSCG00000011272	Pig	4.44946e-94	2.68413	151	21	1.62605e-89	Up-regulated
GTF2A1L	Pig	4.45783e-94	5.13306	0.1	3	1.62911e-89	Up-regulated
CCDC112	Pig	4.8026e-94	1.05585	585	328	1.75511e-89	Up-regulated
SMURF1	Pig	5.00238e-94	1.67156	297	101	1.82812e-89	Up-regulated
TLCD4	Pig	5.25801e-94	1.13995	562	314	1.92154e-89	Up-regulated
CDKN1A	Pig	2.32876e-93	3.50375	117	9	8.51044e-89	Up-regulated
MYCBP2	Pig	2.34981e-93	0.984967	615	381	8.58736e-89	Up-regulated
PXK	Pig	2.42597e-93	1.1785	457	216	8.8657e-89	Up-regulated
IGF2BP3	Pig	3.37781e-93	1.37816	385	0.16	1.23442e-88	Up-regulated
FBXL17	Pig	4.17586e-93	0.887455	702	0.48	1.52607e-88	Up-regulated
SMAD9	Pig	4.20902e-93	2.2091	199	44	1.53819e-88	Up-regulated
INPP5F	Pig	4.5753e-93	1.19185	465	221	1.67204e-88	Up-regulated
GCFC2	Pig	5.73893e-93	1.61402	285	93	2.09729e-88	Up-regulated
KLHDC1	Pig	6.10658e-93	2.22544	202	47	2.23165e-88	Up-regulated
NBAS	Pig	6.72254e-93	1.13063	451	208	2.45675e-88	Up-regulated
HOOK2	Pig	8.0726e-93	2.38001	181	36	2.95013e-88	Up-regulated
PRKCA	Pig	1.16118e-92	1.15049	409	177	4.24354e-88	Up-regulated
C9orf72	Pig	1.30491e-92	2.87944	165	29	4.7688e-88	Up-regulated
KPNA4	Pig	1.38102e-92	1.27571	467	234	5.04694e-88	Up-regulated
DPY19L3	Pig	1.78194e-92	2.0677	273	0.09	6.51211e-88	Up-regulated
PCGF5	Pig	2.58883e-92	0.693351	861	704	9.46088e-88	Up-regulated
DSC2	Pig	4.37445e-92	1.01348	574	324	1.59864e-87	Up-regulated
RPS2	Pig	5.56038e-92	1.76221	282	95	2.03204e-87	Up-regulated
1,00 PGK	Pig	6.88476e-92	2.31105	178	35	2.51603e-87	Up-regulated
APBA1	Pig	1.03673e-91	3.98477	122	11	3.78873e-87	Up-regulated
ENSSSCG00000008892	Pig	1.06217e-91	1.55198	284	93	3.88171e-87	Up-regulated
KIF3A	Pig	1.55149e-91	2.19308	196	44	5.66993e-87	Up-regulated
RAB18	Pig	1.71573e-91	1.16554	455	217	6.27014e-87	Up-regulated
6,00 LSM	Pig	2.33354e-91	2.44938	173	33	8.52791e-87	Up-regulated
ATP5MD	Pig	3.27022e-91	1.7424	248	72	1.1951e-86	Up-regulated
ARHGAP32	Pig	4.13324e-91	2.27787	233	67	1.51049e-86	Up-regulated
PAPSS2	Pig	5.0688e-91	2.65509	167	0.03	1.85239e-86	Up-regulated
TRIP11	Pig	6.93615e-91	1.25337	457	222	2.53482e-86	Up-regulated
MAP4K3	Pig	7.78537e-91	1.29652	428	202	2.84516e-86	Up-regulated
LRCH3	Pig	1.37394e-90	1.02933	632	395	5.02106e-86	Up-regulated
CAV3	Pig	1.52631e-90	2.07367	188	0.04	5.57791e-86	Up-regulated
DENND4C	Pig	1.98324e-90	1.44419	359	147	7.24776e-86	Up-regulated
ENSSSCG00000000207	Pig	3.11314e-90	3.42299	121	11	1.1377e-85	Up-regulated
HSF2	Pig	4.01173e-90	1.43107	299	104	1.46609e-85	Up-regulated
DENND2A	Pig	5.6839e-90	4.1023	132	16	2.07718e-85	Up-regulated
SH3PXD2A	Pig	6.17151e-90	1.60208	377	162	2.25538e-85	Up-regulated
NMNAT3	Pig	9.55975e-90	1.8812	204	49	3.49361e-85	Up-regulated
ENSSSCG00000007735	Pig	9.97376e-90	1.61355	345	141	3.64491e-85	Up-regulated
MRPL57	Pig	1.11188e-89	2.51235	0.15	23	4.06337e-85	Up-regulated
KIFAP3	Pig	1.70682e-89	1.53633	283	96	6.23757e-85	Up-regulated
MSANTD4	Pig	2.67483e-89	1.91809	188	0.04	9.77515e-85	Up-regulated
PRELID2	Pig	3.20535e-89	3.27453	127	14	1.1714e-84	Up-regulated
RFX3	Pig	5.68314e-89	2.92888	155	27	2.0769e-84	Up-regulated
PLEKHA7	Pig	7.14142e-89	1.09582	427	194	2.60983e-84	Up-regulated
HMBOX1	Pig	8.03426e-89	1.08035	535	295	2.93612e-84	Up-regulated
DTNBP1	Pig	8.61155e-89	1.86804	0.27	89	3.14709e-84	Up-regulated
CASP3	Pig	8.84142e-89	1.93121	211	53	3.2311e-84	Up-regulated
PPP1R14B	Pig	1.03818e-88	4.19561	99	4	3.79403e-84	Up-regulated
FCHSD2	Pig	1.14954e-88	1.40088	421	202	4.201e-84	Up-regulated
VPS13C	Pig	1.35603e-88	1.15584	482	247	4.95562e-84	Up-regulated
ATF3	Pig	1.68112e-88	4.35084	0.11	8	6.14367e-84	Up-regulated
MIF	Pig	1.84793e-88	3.4224	119	11	6.75325e-84	Up-regulated
FILIP1L	Pig	2.46981e-88	1.1703	0.4	178	9.0259e-84	Up-regulated
SLC1A4	Pig	2.87834e-88	4.95648	97	4	1.05189e-83	Up-regulated
NDUFA5	Pig	4.03112e-88	1.2672	332	127	1.47317e-83	Up-regulated
HACE1	Pig	4.87436e-88	1.81565	253	79	1.78133e-83	Up-regulated
MAN2A1	Pig	6.00413e-88	2.09358	212	56	2.19421e-83	Up-regulated
MED12L	Pig	6.67761e-88	5.01504	105	6	2.44033e-83	Up-regulated
CCDC88A	Pig	8.28703e-88	2.18843	206	53	3.02849e-83	Up-regulated
DEUP1	Pig	8.81992e-88	3.55065	126	14	3.22324e-83	Up-regulated
ANKRD44	Pig	8.94517e-88	3.79423	115	0.01	3.26901e-83	Up-regulated
PDZRN3	Pig	9.16797e-88	0.725039	802	606	3.35043e-83	Up-regulated
PHF21A	Pig	1.05079e-87	1.20582	479	249	3.84012e-83	Up-regulated
TMX3	Pig	1.10093e-87	1.87132	219	58	4.02336e-83	Up-regulated
EML4	Pig	1.39259e-87	1.71926	271	92	5.08921e-83	Up-regulated
SESN2	Pig	1.5316e-87	5.96696	93	3	5.59722e-83	Up-regulated
BBX	Pig	1.92603e-87	1.34072	417	199	7.03867e-83	Up-regulated
CPNE5	Pig	3.05332e-87	3.49497	116	0.01	1.11583e-82	Up-regulated
ZC3HAV1	Pig	3.66448e-87	2.56534	158	28	1.33919e-82	Up-regulated
PUS7	Pig	4.41512e-87	1.44368	321	121	1.6135e-82	Up-regulated
SP110	Pig	4.55481e-87	9.92252	83	0	1.66455e-82	Up-regulated
GSK3B	Pig	7.2537e-87	0.758028	756	0.55	2.65086e-82	Up-regulated
TM2D1	Pig	1.02362e-86	1.58033	255	0.08	3.74081e-82	Up-regulated
ERC2	Pig	1.25627e-86	3.68624	131	17	4.59105e-82	Up-regulated
ZNF248	Pig	1.39042e-86	1.64396	257	81	5.08128e-82	Up-regulated
TCAP	Pig	1.54768e-86	0.71646	864	792	5.65598e-82	Up-regulated
IWS1	Pig	1.92756e-86	1.47354	314	117	7.04426e-82	Up-regulated
KLHL2	Pig	2.62547e-86	2.584	158	29	9.59479e-82	Up-regulated
ARHGEF33	Pig	2.85205e-86	2.12469	182	0.04	1.04228e-81	Up-regulated
RHOB	Pig	3.19877e-86	2.94649	145	23	1.16899e-81	Up-regulated
USP30	Pig	3.31031e-86	1.43741	303	109	1.20975e-81	Up-regulated
FER	Pig	4.64616e-86	1.24046	433	214	1.69794e-81	Up-regulated
PLAGL1	Pig	4.66159e-86	1.44805	397	185	1.70358e-81	Up-regulated
SLAIN2	Pig	5.80259e-86	1.39176	409	193	2.12056e-81	Up-regulated
CISD3	Pig	6.38326e-86	2.83565	131	16	2.33276e-81	Up-regulated
CLMN	Pig	8.61669e-86	2.88771	139	0.02	3.14897e-81	Up-regulated
SLC30A7	Pig	1.25645e-85	1.68228	254	81	4.59169e-81	Up-regulated
NPTN	Pig	1.59896e-85	0.940939	599	366	5.84341e-81	Up-regulated
ENSSSCG00000017509	Pig	2.87962e-85	3.05345	131	17	1.05236e-80	Up-regulated
PRIMPOL	Pig	6.49777e-85	2.39992	161	0.03	2.37461e-80	Up-regulated
ARL14EP	Pig	7.63611e-85	1.27754	336	132	2.79062e-80	Up-regulated
TBL1XR1	Pig	9.27467e-85	0.87733	0.74	553	3.38943e-80	Up-regulated
ARPP21	Pig	1.09881e-84	4.31513	95	4	4.01558e-80	Up-regulated
DISP1	Pig	1.10621e-84	1.03004	562	322	4.04264e-80	Up-regulated
TRIT1	Pig	1.34547e-84	1.62392	0.31	118	4.91703e-80	Up-regulated
FAM126A	Pig	1.40052e-84	1.03213	511	275	5.11821e-80	Up-regulated
TCF4	Pig	2.87512e-84	1.39525	365	167	1.05071e-79	Up-regulated
ASCC1	Pig	3.56362e-84	1.88012	238	73	1.30233e-79	Up-regulated
AGFG1	Pig	3.74451e-84	1.49359	362	0.16	1.36843e-79	Up-regulated
MTX3	Pig	5.1651e-84	2.57268	162	32	1.88759e-79	Up-regulated
CEMIP2	Pig	7.67141e-84	3.01498	133	19	2.80352e-79	Up-regulated
ENSSSCG00000027348	Pig	7.77515e-84	2.71253	165	34	2.84143e-79	Up-regulated
RPGRIP1L	Pig	1.14321e-83	1.78691	229	67	4.17787e-79	Up-regulated
ARL6IP5	Pig	1.59064e-83	1.43494	313	119	5.81301e-79	Up-regulated
STT3B	Pig	1.71293e-83	1.24761	0.38	0.17	6.2599e-79	Up-regulated
EXOC5	Pig	2.26694e-83	0.969859	533	297	8.28452e-79	Up-regulated
NHS	Pig	2.40948e-83	6.34061	84	1	8.80546e-79	Up-regulated
SPTB	Pig	3.20955e-83	1.06897	495	257	1.17293e-78	Up-regulated
SLC39A11	Pig	5.29607e-83	1.86145	235	72	1.93545e-78	Up-regulated
PLEKHA4	Pig	6.49761e-83	4.30369	105	8	2.37455e-78	Up-regulated
TIMP3	Pig	1.16854e-82	1.4057	443	233	4.27043e-78	Up-regulated
ARL5A	Pig	1.18229e-82	2.96119	136	21	4.32069e-78	Up-regulated
NUAK1	Pig	1.491e-82	1.86435	278	0.1	5.44885e-78	Up-regulated
ENSSSCG00000012006	Pig	1.82429e-82	6.98009	82	1	6.66688e-78	Up-regulated
ALOX15	Pig	2.03724e-82	2.84239	148	26	7.4451e-78	Up-regulated
NDUFB4	Pig	2.12428e-82	1.88538	197	0.05	7.76317e-78	Up-regulated
DENND1A	Pig	3.21614e-82	0.934845	0.64	425	1.17534e-77	Up-regulated
SEC24D	Pig	7.61419e-82	1.06343	527	306	2.78261e-77	Up-regulated
COPG2	Pig	8.09389e-82	1.6088	278	99	2.95791e-77	Up-regulated
ALG14	Pig	1.19569e-81	2.46546	158	31	4.36965e-77	Up-regulated
NTN1	Pig	1.78671e-81	6.60547	0.08	1	6.52953e-77	Up-regulated
SPATA5	Pig	4.86873e-81	1.01315	494	264	1.77928e-76	Up-regulated
PALMD	Pig	4.87364e-81	0.867339	651	422	1.78107e-76	Up-regulated
KRT10	Pig	4.88781e-81	2.23943	152	28	1.78625e-76	Up-regulated
ADM	Pig	5.63916e-81	9.8562	78	0	2.06083e-76	Up-regulated
LONP2	Pig	6.25907e-81	0.963596	601	0.36	2.28738e-76	Up-regulated
ERBIN	Pig	1.02536e-80	0.960749	644	435	3.74718e-76	Up-regulated
SEPTIN9	Pig	1.05223e-80	3.27255	132	0.02	3.84537e-76	Up-regulated
AP3B1	Pig	1.57351e-80	1.25334	381	175	5.75039e-76	Up-regulated
ENSSSCG00000013609	Pig	1.91905e-80	2.7974	119	14	7.01316e-76	Up-regulated
ANKAR	Pig	2.08558e-80	2.72023	142	24	7.62175e-76	Up-regulated
UOX	Pig	2.14286e-80	1.42655	257	85	7.83108e-76	Up-regulated
GSTCD	Pig	2.21027e-80	2.61337	139	23	8.07742e-76	Up-regulated
TNKS2	Pig	2.40896e-80	1.39953	351	154	8.80354e-76	Up-regulated
HMOX1	Human	2.61077e-80	1.33261	513	306	9.54105e-76	Up-regulated
COX5B	Pig	3.39472e-80	1.47749	271	94	1.2406e-75	Up-regulated
RNF217	Pig	4.45162e-80	2.66428	151	29	1.62685e-75	Up-regulated
SCAF11	Pig	6.54337e-80	0.931616	564	333	2.39127e-75	Up-regulated
ENSSSCG00000043778	Pig	1.1281e-79	1.99107	196	51	4.12263e-75	Up-regulated
HDGFL3	Pig	1.18287e-79	1.28541	374	169	4.32281e-75	Up-regulated
ENSSSCG00000011237	Pig	1.25389e-79	1.22262	393	186	4.58234e-75	Up-regulated
ARHGAP21	Pig	1.38276e-79	1.24739	432	218	5.05328e-75	Up-regulated
MOV10	Pig	1.73393e-79	4.98507	89	4	6.33664e-75	Up-regulated
IER5	Pig	1.80474e-79	3.17913	109	11	6.59541e-75	Up-regulated
CHMP4B	Pig	2.62128e-79	1.4597	295	111	9.57946e-75	Up-regulated
CEP170	Pig	3.42196e-79	1.51742	294	114	1.25055e-74	Up-regulated
ASPH	Pig	3.94203e-79	1.08952	495	269	1.44061e-74	Up-regulated
IQGAP1	Pig	5.90923e-79	0.954901	577	348	2.15953e-74	Up-regulated
EEA1	Pig	6.54914e-79	0.924117	523	297	2.39338e-74	Up-regulated
ETFRF1	Pig	9.91807e-79	1.54127	0.22	65	3.62456e-74	Up-regulated
COMMD8	Pig	1.09332e-78	1.83599	186	46	3.99555e-74	Up-regulated
WWC1	Pig	1.43514e-78	2.88877	122	16	5.24472e-74	Up-regulated
CSE1L	Pig	2.72407e-78	1.41766	333	139	9.95511e-74	Up-regulated
TANC2	Pig	4.05221e-78	1.71697	297	118	1.48088e-73	Up-regulated
RAB1A	Pig	5.05406e-78	1.33124	336	143	1.847e-73	Up-regulated
ENSSSCG00000016263	Pig	6.15014e-78	9.80233	75	0	2.24757e-73	Up-regulated
ENSSSCG00000027557	Pig	6.51639e-78	0.915801	599	355	2.38141e-73	Up-regulated
RABGAP1L	Pig	9.32026e-78	1.00097	564	352	3.40609e-73	Up-regulated
CTSB	Pig	9.43225e-78	2.41565	156	33	3.44702e-73	Up-regulated
ENSSSCG00000028092	Pig	1.39218e-77	6.97399	77	1	5.08771e-73	Up-regulated
ENSSSCG00000014569	Pig	1.55498e-77	1.84734	224	0.07	5.68267e-73	Up-regulated
ENSSSCG00000014910	Pig	1.66866e-77	9.69952	74	0	6.09811e-73	Up-regulated
GPR155	Pig	1.69544e-77	5.17952	83	3	6.196e-73	Up-regulated
BCLAF3	Pig	1.7879e-77	1.35091	335	141	6.53388e-73	Up-regulated
GPD2	Pig	2.02903e-77	1.38119	305	0.12	7.41509e-73	Up-regulated
RPL38	Pig	2.81159e-77	3.0951	109	12	1.0275e-72	Up-regulated
GNPDA2	Pig	3.03143e-77	0.977722	494	267	1.10784e-72	Up-regulated
ENSSSCG00000024660	Pig	3.1234e-77	7.67294	76	1	1.14145e-72	Up-regulated
FRRS1	Pig	4.77806e-77	1.06002	418	207	1.74614e-72	Up-regulated
RANBP6	Pig	5.84716e-77	1.64011	245	82	2.13685e-72	Up-regulated
VASH2	Pig	5.90912e-77	4.75058	0.09	5	2.15949e-72	Up-regulated
PHLDA2	Pig	7.90366e-77	3.98645	94	6	2.88839e-72	Up-regulated
YWHAZ	Pig	9.14179e-77	1.01481	522	303	3.34087e-72	Up-regulated
ENSSSCG00000009303	Pig	1.1696e-76	2.7645	127	19	4.2743e-72	Up-regulated
ILDR2	Pig	1.18109e-76	8.2895	74	0	4.31631e-72	Up-regulated
MKNK1	Pig	1.22471e-76	1.93164	224	0.07	4.47568e-72	Up-regulated
SLC7A11	Pig	1.23203e-76	2.05181	0.18	45	4.50246e-72	Up-regulated
NNT	Pig	1.35862e-76	0.812771	0.61	381	4.96509e-72	Up-regulated
PLEKHA1	Pig	2.45382e-76	1.16276	394	188	8.9675e-72	Up-regulated
LRRC2	Pig	2.59324e-76	0.519344	903	819	9.47699e-72	Up-regulated
ARHGAP17	Pig	2.98268e-76	1.49337	512	0.31	1.09002e-71	Up-regulated
RDH14	Pig	3.36461e-76	2.69294	131	21	1.2296e-71	Up-regulated
ENSSSCG00000040273	Pig	3.84045e-76	2.55627	137	24	1.40349e-71	Up-regulated
ENSSSCG00000016687	Pig	4.99048e-76	1.97445	242	85	1.82377e-71	Up-regulated
PACSIN3	Pig	6.35579e-76	1.1298	272	96	2.32272e-71	Up-regulated
OSBPL11	Pig	1.92672e-75	1.1524	577	362	7.04121e-71	Up-regulated
CADM1	Pig	1.98864e-75	4.08338	87	4	7.26747e-71	Up-regulated
ENSSSCG00000006081	Pig	2.06924e-75	2.9122	123	18	7.56203e-71	Up-regulated
AK4	Pig	2.53477e-75	7.19774	73	0	9.26333e-71	Up-regulated
FBXO21	Pig	2.87674e-75	1.05902	434	216	1.05131e-70	Up-regulated
ZFP64	Pig	5.51647e-75	2.35496	168	39	2.01599e-70	Up-regulated
FDX1	Pig	8.46596e-75	1.87576	0.19	51	3.09388e-70	Up-regulated
PBX3	Pig	8.61415e-75	1.61435	262	96	3.14804e-70	Up-regulated
ENSSSCG00000031589	Pig	9.23581e-75	3.96212	88	5	3.37523e-70	Up-regulated
CAMKK1	Pig	1.03589e-74	5.27187	84	4	3.78565e-70	Up-regulated
ENSSSCG00000035751	Pig	1.12398e-74	1.06609	518	314	4.10759e-70	Up-regulated
RPL36AL	Pig	1.33836e-74	2.47979	129	21	4.89104e-70	Up-regulated
CHORDC1	Pig	1.74701e-74	1.13063	0.37	169	6.38444e-70	Up-regulated
TPM1	Human	2.72056e-74	1.70293	189	0.05	9.9423e-70	Up-regulated
KIZ	Pig	2.8222e-74	1.80934	0.2	57	1.03137e-69	Up-regulated
DBI	Pig	2.91346e-74	3.55506	96	8	1.06472e-69	Up-regulated
OBSCN	Pig	3.05749e-74	0.616528	864	768	1.11736e-69	Up-regulated
ENSSSCG00000032129	Pig	3.22986e-74	1.35084	309	127	1.18035e-69	Up-regulated
WDR70	Pig	3.25156e-74	1.11475	406	198	1.18828e-69	Up-regulated
ZNF407	Pig	4.00977e-74	0.975941	527	306	1.46537e-69	Up-regulated
ORC4	Pig	4.22238e-74	1.00263	484	266	1.54307e-69	Up-regulated
ASB18	Pig	6.27473e-74	1.0186	405	194	2.2931e-69	Up-regulated
ABI2	Pig	7.93413e-74	3.80074	98	9	2.89953e-69	Up-regulated
RSU1	Pig	9.26387e-74	1.20909	378	178	3.38548e-69	Up-regulated
PIP5K1C	Pig	9.65308e-74	3.56962	0.11	13	3.52772e-69	Up-regulated
URI1	Pig	1.05017e-73	0.960396	497	277	3.83783e-69	Up-regulated
TSPAN3	Pig	1.25666e-73	1.58978	248	86	4.59245e-69	Up-regulated
SMAD2	Pig	1.55749e-73	1.62112	273	106	5.69186e-69	Up-regulated
RNF13	Pig	1.7234e-73	1.24431	385	188	6.29815e-69	Up-regulated
C16orf72	Pig	1.77776e-73	1.23513	334	143	6.49682e-69	Up-regulated
SPG11	Pig	1.85739e-73	1.93237	204	61	6.78782e-69	Up-regulated
CLTC	Pig	2.77856e-73	1.02662	442	227	1.01543e-68	Up-regulated
CHFR	Pig	3.16927e-73	1.32026	303	0.12	1.15821e-68	Up-regulated
FBXL2	Pig	4.91695e-73	1.56205	225	72	1.7969e-68	Up-regulated
CKM	Pig	4.94613e-73	1.09278	494	285	1.80756e-68	Up-regulated
DHRS11	Pig	4.98407e-73	1.7155	252	89	1.82143e-68	Up-regulated
LRP2	Pig	5.3573e-73	2.45055	122	19	1.95783e-68	Up-regulated
SRXN1	Pig	5.56741e-73	4.99126	78	2	2.03461e-68	Up-regulated
NR6A1	Pig	5.59568e-73	1.02611	402	191	2.04494e-68	Up-regulated
IRF2	Pig	7.16534e-73	1.17708	423	216	2.61857e-68	Up-regulated
FAM76A	Pig	7.32606e-73	1.43754	292	116	2.67731e-68	Up-regulated
STK10	Pig	7.99117e-73	2.23057	164	39	2.92037e-68	Up-regulated
ENSSSCG00000011559	Pig	8.28926e-73	1.91912	196	56	3.02931e-68	Up-regulated
BMP2K	Pig	8.65997e-73	1.6111	287	115	3.16478e-68	Up-regulated
MAPK8	Pig	1.00548e-72	0.962877	0.45	231	3.67453e-68	Up-regulated
RARS2	Pig	1.23057e-72	1.22112	319	133	4.49713e-68	Up-regulated
PHTF1	Pig	1.34748e-72	1.87122	203	0.06	4.92435e-68	Up-regulated
SMARCAD1	Pig	1.54509e-72	1.29654	294	117	5.64654e-68	Up-regulated
SEC22C	Pig	1.59025e-72	1.64703	206	61	5.81155e-68	Up-regulated
CSNK1G3	Pig	1.61655e-72	1.38131	272	103	5.90768e-68	Up-regulated
MAPK6	Pig	1.77592e-72	1.25746	0.28	106	6.49009e-68	Up-regulated
SPSB1	Pig	1.83415e-72	2.71396	0.13	22	6.70291e-68	Up-regulated
ENSSSCG00000030801	Pig	2.41958e-72	4.14606	88	6	8.84237e-68	Up-regulated
SERP2	Pig	2.51371e-72	2.81856	131	23	9.18636e-68	Up-regulated
HIGD2A	Pig	2.52819e-72	2.80259	0.11	14	9.23926e-68	Up-regulated
CPQ	Pig	3.10253e-72	4.98534	82	4	1.13382e-67	Up-regulated
YBX3	Pig	3.15148e-72	0.804009	634	423	1.15171e-67	Up-regulated
SRD5A2	Pig	3.98844e-72	4.7485	78	3	1.45758e-67	Up-regulated
GNA12	Pig	4.81852e-72	1.23398	296	117	1.76093e-67	Up-regulated
ANKRD17	Pig	5.32666e-72	0.576638	847	726	1.94663e-67	Up-regulated
EIF3H	Pig	7.12982e-72	1.16446	322	136	2.60559e-67	Up-regulated
DNAJC10	Pig	7.83552e-72	1.8224	169	41	2.86349e-67	Up-regulated
PDE6D	Pig	8.69743e-72	1.87268	177	45	3.17848e-67	Up-regulated
FAM13A	Pig	1.02722e-71	1.04277	548	339	3.75397e-67	Up-regulated
ASXL2	Pig	1.03537e-71	1.0576	431	218	3.78376e-67	Up-regulated
ENSSSCG00000007322	Pig	1.20414e-71	2.72205	141	29	4.40054e-67	Up-regulated
DNAJC1	Pig	1.67335e-71	0.838486	664	458	6.11526e-67	Up-regulated
ACSL4	Pig	1.9813e-71	1.636	0.26	99	7.24066e-67	Up-regulated
PCMT1	Pig	2.17568e-71	1.08874	373	175	7.95104e-67	Up-regulated
VRK2	Pig	2.24567e-71	1.4171	0.29	118	8.20682e-67	Up-regulated
ACO1	Pig	2.3249e-71	0.806992	575	348	8.49635e-67	Up-regulated
ENSSSCG00000007203	Pig	2.98361e-71	1.00522	404	197	1.09036e-66	Up-regulated
EFR3B	Pig	3.99261e-71	1.24447	338	148	1.4591e-66	Up-regulated
TSPAN15	Pig	4.2232e-71	2.56198	148	32	1.54337e-66	Up-regulated
RHBDD1	Pig	4.54742e-71	2.22443	167	42	1.66185e-66	Up-regulated
RAD23B	Pig	4.72275e-71	0.99493	431	221	1.72593e-66	Up-regulated
PIK3CA	Pig	5.06088e-71	1.01634	438	228	1.8495e-66	Up-regulated
PGAM2	Pig	5.09664e-71	2.47272	136	26	1.86257e-66	Up-regulated
TTC13	Pig	6.38107e-71	2.20854	186	52	2.33196e-66	Up-regulated
BIRC6	Pig	7.86355e-71	0.710952	739	562	2.87373e-66	Up-regulated
ANO10	Pig	8.00558e-71	1.12598	368	171	2.92564e-66	Up-regulated
NF1	Pig	1.04445e-70	0.752894	713	531	3.81692e-66	Up-regulated
ARHGAP29	Pig	1.09763e-70	1.9207	171	43	4.01128e-66	Up-regulated
ELOB	Pig	1.16051e-70	2.13985	151	33	4.24108e-66	Up-regulated
PEA15	Pig	1.29654e-70	2.56144	128	22	4.73821e-66	Up-regulated
SBF2	Pig	1.30709e-70	0.735288	711	0.55	4.77675e-66	Up-regulated
JAKMIP3	Pig	1.71513e-70	2.5319	118	18	6.26796e-66	Up-regulated
SENP7	Pig	2.61486e-70	1.13361	362	168	9.55601e-66	Up-regulated
LCOR	Pig	2.80369e-70	0.926562	558	346	1.02461e-65	Up-regulated
ENSSSCG00000037142	Pig	2.83187e-70	5.11316	77	3	1.03491e-65	Up-regulated
ARHGEF11	Pig	3.89098e-70	1.36497	325	142	1.42196e-65	Up-regulated
SLC7A2	Pig	4.1533e-70	1.17506	345	157	1.51782e-65	Up-regulated
STAU2	Pig	4.29659e-70	0.621218	0.79	607	1.57019e-65	Up-regulated
ENSSSCG00000028345	Pig	8.82357e-70	1.41724	254	92	3.22457e-65	Up-regulated
TM6SF1	Pig	9.64953e-70	2.23596	141	29	3.52642e-65	Up-regulated
SNX25	Pig	1.33171e-69	1.62097	224	75	4.86673e-65	Up-regulated
CIPC	Pig	1.4562e-69	1.37767	0.24	83	5.3217e-65	Up-regulated
RPL23	Pig	1.50821e-69	1.91444	183	51	5.51175e-65	Up-regulated
IBTK	Pig	1.57323e-69	0.966464	484	269	5.74936e-65	Up-regulated
ENSSSCG00000016791	Pig	2.09977e-69	3.42978	95	9	7.67363e-65	Up-regulated
CST3	Pig	2.17513e-69	4.6255	71	1	7.949e-65	Up-regulated
PARP14	Pig	2.44834e-69	6.41536	69	1	8.94745e-65	Up-regulated
RPS12	Pig	2.59618e-69	2.25761	155	37	9.48773e-65	Up-regulated
COX7A2	Pig	2.94884e-69	1.83627	0.18	0.05	1.07765e-64	Up-regulated
ARL5B	Pig	3.41592e-69	2.35766	134	26	1.24835e-64	Up-regulated
ZMYND8	Pig	3.55199e-69	1.15746	359	165	1.29807e-64	Up-regulated
ARL8B	Pig	4.27236e-69	1.2309	298	123	1.56133e-64	Up-regulated
ABLIM2	Pig	5.43388e-69	0.891349	434	0.22	1.98581e-64	Up-regulated
ANKS4B	Pig	6.38219e-69	6.75295	68	1	2.33237e-64	Up-regulated
RNGTT	Pig	9.83196e-69	1.03459	394	193	3.59309e-64	Up-regulated
FBN2	Pig	1.23851e-68	1.96615	223	77	4.52613e-64	Up-regulated
C2orf76	Pig	1.75702e-68	2.76753	111	16	6.42103e-64	Up-regulated
ARHGAP31	Pig	2.25593e-68	1.47102	267	103	8.24428e-64	Up-regulated
P4HA2	Pig	2.25701e-68	1.77077	198	0.06	8.24824e-64	Up-regulated
RBM45	Pig	2.25937e-68	2.08041	157	38	8.25687e-64	Up-regulated
CRACR2A	Pig	2.27997e-68	1.46621	196	58	8.33216e-64	Up-regulated
SLC44A1	Pig	2.95207e-68	2.17618	151	35	1.07883e-63	Up-regulated
TRPM6	Pig	3.76212e-68	3.11648	105	14	1.37487e-63	Up-regulated
RPLP0	Pig	3.78924e-68	1.47443	206	64	1.38478e-63	Up-regulated
ENSSSCG00000005453	Pig	4.34399e-68	3.44141	94	9	1.58751e-63	Up-regulated
MBNL3	Pig	4.55309e-68	1.88289	213	0.07	1.66393e-63	Up-regulated
IMPG2	Pig	4.73915e-68	2.5981	126	23	1.73192e-63	Up-regulated
ULK4	Pig	4.74408e-68	1.72837	239	87	1.73372e-63	Up-regulated
ENSSSCG00000035904	Pig	5.94777e-68	1.74048	188	54	2.17361e-63	Up-regulated
CASK	Pig	6.81922e-68	1.72868	207	67	2.49209e-63	Up-regulated
RPS11	Pig	7.27087e-68	2.64609	119	0.02	2.65714e-63	Up-regulated
VPS50	Pig	9.49659e-68	1.04572	436	229	3.47053e-63	Up-regulated
TTLL7	Pig	1.04952e-67	0.657841	583	356	3.83546e-63	Up-regulated
RMDN1	Pig	1.27497e-67	1.73985	188	55	4.65937e-63	Up-regulated
H2BC21	Pig	1.3768e-67	2.52126	111	16	5.03151e-63	Up-regulated
ME1	Pig	1.56283e-67	1.94174	166	43	5.71138e-63	Up-regulated
LRRTM3	Pig	2.34385e-67	1.17521	616	473	8.56561e-63	Up-regulated
HEATR3	Pig	2.36699e-67	1.18794	367	175	8.65016e-63	Up-regulated
PARG	Pig	2.67623e-67	1.29491	283	114	9.78029e-63	Up-regulated
STRN3	Pig	3.50658e-67	0.803388	679	476	1.28148e-62	Up-regulated
DENND6A	Pig	4.01779e-67	1.50292	277	113	1.4683e-62	Up-regulated
FAM162A	Pig	4.39825e-67	1.01544	372	179	1.60734e-62	Up-regulated
ATP1B1	Pig	4.83914e-67	0.784067	667	456	1.76846e-62	Up-regulated
ATG4C	Pig	4.96181e-67	3.1673	106	15	1.81329e-62	Up-regulated
KCNAB1	Pig	6.17647e-67	3.3101	0.1	12	2.25719e-62	Up-regulated
ENSSSCG00000030849	Pig	7.48753e-67	3.42025	86	7	2.73632e-62	Up-regulated
TUBB	Pig	8.71139e-67	2.94747	104	14	3.18358e-62	Up-regulated
ENSSSCG00000044615	Pig	1.02453e-66	3.23969	0.09	9	3.74416e-62	Up-regulated
CLCN5	Pig	1.1145e-66	3.06171	102	13	4.07295e-62	Up-regulated
RPL15	Pig	1.36015e-66	2.28208	127	23	4.97066e-62	Up-regulated
APAF1	Pig	1.618e-66	2.46221	132	27	5.91298e-62	Up-regulated
ADAM17	Pig	2.06946e-66	2.65772	122	22	7.56285e-62	Up-regulated
DENND3	Pig	2.53899e-66	4.89242	73	3	9.27873e-62	Up-regulated
SHPRH	Pig	2.61941e-66	1.17969	315	137	9.57262e-62	Up-regulated
BMPER	Pig	2.81107e-66	3.14971	104	14	1.0273e-61	Up-regulated
CCDC136	Pig	4.61582e-66	1.63656	185	54	1.68685e-61	Up-regulated
BTRC	Pig	5.55906e-66	0.828961	608	386	2.03156e-61	Up-regulated
TTC27	Pig	5.87286e-66	1.40829	233	82	2.14624e-61	Up-regulated
FOXN2	Pig	6.19885e-66	3.18503	103	14	2.26537e-61	Up-regulated
TOPAZ1	Pig	6.98482e-66	1.8064	191	59	2.5526e-61	Up-regulated
RYK	Pig	8.8237e-66	1.11201	372	183	3.22462e-61	Up-regulated
CEP63	Pig	9.66584e-66	1.1301	0.33	147	3.53238e-61	Up-regulated
SEPTIN7	Pig	9.71103e-66	0.9984	476	273	3.54889e-61	Up-regulated
TMEM161B	Pig	1.18163e-65	0.968484	0.4	202	4.31826e-61	Up-regulated
TM2D3	Pig	1.41897e-65	1.43104	212	0.07	5.18564e-61	Up-regulated
WIPI1	Pig	1.53989e-65	1.12349	394	199	5.62753e-61	Up-regulated
CERT1	Pig	2.20552e-65	0.978996	577	377	8.06009e-61	Up-regulated
NDFIP2	Pig	2.78044e-65	1.20991	279	113	1.01611e-60	Up-regulated
ZNF292	Pig	3.31513e-65	0.960403	554	356	1.21151e-60	Up-regulated
ERAP1	Pig	3.41477e-65	2.31039	114	19	1.24793e-60	Up-regulated
ANKRD37	Pig	4.62378e-65	8.48426	64	0	1.68976e-60	Up-regulated
ENSSSCG00000035650	Pig	4.79146e-65	1.88502	159	0.04	1.75104e-60	Up-regulated
BMP4	Pig	5.07203e-65	4.65586	79	5	1.85357e-60	Up-regulated
MAP2K5	Pig	5.72846e-65	1.02698	477	274	2.09347e-60	Up-regulated
TBC1D19	Pig	6.50397e-65	1.2521	253	95	2.37687e-60	Up-regulated
JMJD1C	Pig	9.82319e-65	0.538428	847	752	3.58988e-60	Up-regulated
FSD1L	Pig	1.46905e-64	1.2654	0.29	122	5.36864e-60	Up-regulated
ENSSSCG00000002449	Pig	2.1226e-64	2.65427	114	19	7.75706e-60	Up-regulated
RAB4A	Pig	2.47332e-64	1.41477	236	86	9.03876e-60	Up-regulated
SLC38A6	Pig	2.79096e-64	2.89516	108	17	1.01996e-59	Up-regulated
APPL2	Pig	3.3789e-64	0.853697	489	276	1.23482e-59	Up-regulated
PLAAT3	Pig	3.88756e-64	2.08194	0.18	54	1.42071e-59	Up-regulated
SLC36A4	Pig	4.47644e-64	1.6881	0.21	72	1.63591e-59	Up-regulated
ITFG1	Pig	5.44004e-64	0.883112	504	289	1.98806e-59	Up-regulated
TEX2	Pig	6.18e-64	1.20884	311	136	2.25848e-59	Up-regulated
C15orf61	Pig	7.52243e-64	2.57756	102	14	2.74907e-59	Up-regulated
RPS5	Pig	7.76271e-64	2.24644	136	0.03	2.83688e-59	Up-regulated
ENSSSCG00000009146	Pig	9.248e-64	2.12793	159	42	3.37968e-59	Up-regulated
GOLM2	Pig	1.0197e-63	0.944994	371	179	3.72648e-59	Up-regulated
MSH4	Pig	1.03215e-63	1.53029	0.21	72	3.77198e-59	Up-regulated
MED13	Pig	1.5587e-63	0.850579	574	367	5.69626e-59	Up-regulated
SMAP2	Pig	1.57931e-63	4.41358	76	5	5.77158e-59	Up-regulated
TPI1	Pig	1.66409e-63	1.3305	186	55	6.0814e-59	Up-regulated
WDFY3	Pig	1.66822e-63	0.860101	608	415	6.09651e-59	Up-regulated
KIF3C	Pig	2.35072e-63	2.40892	138	31	8.5907e-59	Up-regulated
CD47	Human	3.03945e-63	1.22339	365	183	1.11077e-58	Up-regulated
SMARCD3	Pig	3.47052e-63	1.88262	162	43	1.2683e-58	Up-regulated
ZFYVE16	Pig	6.10256e-63	1.12993	342	162	2.23018e-58	Up-regulated
PPP4R3B	Pig	6.15929e-63	1.0081	413	216	2.25091e-58	Up-regulated
TFG	Pig	6.47084e-63	1.3229	237	88	2.36477e-58	Up-regulated
CMC1	Pig	6.5195e-63	1.95125	151	38	2.38255e-58	Up-regulated
CGGBP1	Pig	6.9225e-63	1.38987	208	0.07	2.52983e-58	Up-regulated
PCYT1A	Pig	6.94254e-63	0.890846	458	251	2.53715e-58	Up-regulated
PIK3C3	Pig	6.9656e-63	1.16549	341	162	2.54558e-58	Up-regulated
PTK2B	Pig	7.39077e-63	3.76272	82	7	2.70096e-58	Up-regulated
PLOD2	Pig	8.5194e-63	2.51586	204	73	3.11342e-58	Up-regulated
ABHD15	Pig	8.57711e-63	3.55572	85	8	3.1345e-58	Up-regulated
GPC4	Pig	8.74777e-63	1.7875	168	46	3.19687e-58	Up-regulated
CAB39	Pig	8.79227e-63	0.952381	497	293	3.21313e-58	Up-regulated
UBA3	Pig	9.15399e-63	1.15153	294	125	3.34533e-58	Up-regulated
HK2	Pig	9.22085e-63	2.53819	121	23	3.36976e-58	Up-regulated
ENSSSCG00000016426	Pig	1.00913e-62	1.63434	231	86	3.68785e-58	Up-regulated
SARS1	Pig	1.06872e-62	1.92106	142	33	3.90562e-58	Up-regulated
GFM2	Pig	1.19412e-62	2.02272	139	32	4.3639e-58	Up-regulated
TASOR2	Pig	1.45832e-62	1.31235	0.28	118	5.32944e-58	Up-regulated
HIRA	Pig	1.48155e-62	1.39769	238	89	5.41433e-58	Up-regulated
CAGE1	Pig	1.77011e-62	1.53124	179	53	6.46886e-58	Up-regulated
VPS45	Pig	1.81132e-62	2.62736	0.11	18	6.61948e-58	Up-regulated
ANKS6	Pig	1.91806e-62	2.40761	116	21	7.00956e-58	Up-regulated
EEF2	Pig	2.01618e-62	1.35427	247	95	7.36814e-58	Up-regulated
RBM26	Pig	2.05846e-62	0.872315	545	342	7.52266e-58	Up-regulated
PSMA3	Pig	2.29863e-62	1.14539	277	114	8.40035e-58	Up-regulated
COX8A	Pig	3.83277e-62	1.81453	144	34	1.40069e-57	Up-regulated
C12orf4	Pig	4.42754e-62	1.76968	169	48	1.61804e-57	Up-regulated
ZNF583	Pig	5.17086e-62	1.74384	162	44	1.88969e-57	Up-regulated
MAP4K4	Pig	5.63235e-62	1.28023	268	0.11	2.05834e-57	Up-regulated
RPS29	Pig	5.98045e-62	1.45215	207	0.07	2.18555e-57	Up-regulated
RPL28	Pig	7.35426e-62	3.00115	94	12	2.68761e-57	Up-regulated
ARHGEF26	Pig	7.38737e-62	2.3808	123	25	2.69971e-57	Up-regulated
NPC1	Pig	7.73681e-62	2.39028	114	0.02	2.82742e-57	Up-regulated
ENSSSCG00000013906	Pig	9.32397e-62	1.61725	187	59	3.40745e-57	Up-regulated
ATP5F1D	Pig	9.87652e-62	1.39386	199	64	3.60937e-57	Up-regulated
NDUFB10	Pig	1.05167e-61	2.37981	112	19	3.84332e-57	Up-regulated
FBXL5	Pig	1.224e-61	1.34028	251	98	4.47312e-57	Up-regulated
NDUFA1	Pig	1.30026e-61	2.32108	0.13	28	4.75181e-57	Up-regulated
UVRAG	Pig	3.21726e-61	0.778277	638	451	1.17575e-56	Up-regulated
TBC1D16	Pig	3.5008e-61	2.35173	147	38	1.27937e-56	Up-regulated
ENSSSCG00000021041	Pig	4.24531e-61	1.41385	206	0.07	1.55145e-56	Up-regulated
GRB2	Pig	4.45226e-61	1.25054	296	131	1.62708e-56	Up-regulated
OPA1	Pig	6.17273e-61	1.03014	367	182	2.25582e-56	Up-regulated
TIMM8B	Pig	6.42157e-61	1.89204	155	41	2.34676e-56	Up-regulated
UBE2W	Pig	7.11567e-61	1.10408	423	227	2.60042e-56	Up-regulated
PDS5A	Pig	7.44156e-61	0.910731	445	248	2.71952e-56	Up-regulated
VPS37A	Pig	7.49542e-61	1.17424	265	108	2.7392e-56	Up-regulated
OSBPL9	Pig	8.7212e-61	0.767777	595	392	3.18716e-56	Up-regulated
RICTOR	Pig	9.30461e-61	0.676043	708	537	3.40037e-56	Up-regulated
ENSSSCG00000034230	Pig	9.40195e-61	1.82179	165	47	3.43594e-56	Up-regulated
CSNK1G1	Pig	1.18243e-60	1.07482	377	191	4.3212e-56	Up-regulated
PM20D2	Pig	1.20488e-60	1.38991	246	96	4.40323e-56	Up-regulated
ENSSSCG00000046747	Pig	1.34808e-60	4.0808	76	5	4.92656e-56	Up-regulated
ENSSSCG00000028691	Pig	1.78063e-60	3.93138	76	6	6.5073e-56	Up-regulated
PRDX2	Pig	1.79322e-60	1.96405	0.13	28	6.55333e-56	Up-regulated
DROSHA	Pig	1.84642e-60	1.49091	216	77	6.74773e-56	Up-regulated
ENSSSCG00000023158	Pig	1.9556e-60	1.3283	191	61	7.14675e-56	Up-regulated
RBM12B	Pig	2.38799e-60	1.09876	368	187	8.7269e-56	Up-regulated
CCDC9B	Pig	2.3888e-60	1.84185	127	27	8.72985e-56	Up-regulated
KCTD8	Pig	2.48019e-60	3.24189	95	13	9.06386e-56	Up-regulated
SLC12A7	Pig	2.69996e-60	0.737831	394	198	9.86702e-56	Up-regulated
AATF	Pig	3.26266e-60	1.89032	163	47	1.19234e-55	Up-regulated
ARMC2	Pig	4.31791e-60	0.979493	424	235	1.57798e-55	Up-regulated
FAR2	Pig	5.03384e-60	1.90868	161	45	1.83962e-55	Up-regulated
ENSSSCG00000005424	Pig	6.16257e-60	0.820435	461	0.26	2.25211e-55	Up-regulated
LRRC28	Pig	6.26928e-60	0.692191	655	435	2.29111e-55	Up-regulated
TPST1	Pig	7.36251e-60	3.0147	93	13	2.69063e-55	Up-regulated
TRAFD1	Pig	9.05126e-60	2.48936	129	29	3.30778e-55	Up-regulated
TSEN2	Pig	1.07389e-59	1.75754	281	126	3.92452e-55	Up-regulated
TRMT11	Pig	1.09208e-59	1.16925	282	0.12	3.991e-55	Up-regulated
COBLL1	Pig	1.34259e-59	1.98273	153	41	4.90649e-55	Up-regulated
DPP3	Pig	1.36686e-59	3.97731	75	6	4.99519e-55	Up-regulated
FGD6	Pig	1.4465e-59	0.93551	523	331	5.28624e-55	Up-regulated
RPL27	Pig	1.63486e-59	2.6192	103	17	5.97459e-55	Up-regulated
C9orf40	Pig	1.64879e-59	4.46975	69	4	6.02552e-55	Up-regulated
OSMR	Pig	2.3979e-59	3.67859	76	6	8.76311e-55	Up-regulated
ENSSSCG00000029668	Pig	2.81731e-59	3.17816	0.09	11	1.02959e-54	Up-regulated
ENSSSCG00000006350	Pig	3.88594e-59	4.97766	64	2	1.42012e-54	Up-regulated
ZCCHC8	Pig	5.24364e-59	1.16727	288	125	1.91629e-54	Up-regulated
DPP8	Pig	6.04614e-59	1.24307	313	147	2.20956e-54	Up-regulated
SCFD1	Pig	8.33758e-59	0.954138	425	233	3.04697e-54	Up-regulated
S100A1	Pig	1.06821e-58	2.12118	139	34	3.90379e-54	Up-regulated
CPEB2	Pig	1.13559e-58	1.31139	0.29	131	4.15003e-54	Up-regulated
NUMB	Pig	1.27192e-58	1.15332	364	187	4.64822e-54	Up-regulated
CDK14	Pig	1.3124e-58	0.567939	0.85	772	4.79618e-54	Up-regulated
CDK7	Pig	1.44134e-58	2.24114	129	29	5.26738e-54	Up-regulated
CBLB	Pig	1.58556e-58	0.803781	674	511	5.79443e-54	Up-regulated
CRYBA1	Pig	1.59994e-58	1.50574	159	45	5.84697e-54	Up-regulated
ATR	Pig	1.75812e-58	1.38472	246	98	6.42504e-54	Up-regulated
ENSSSCG00000032456	Pig	1.99441e-58	3.4231	74	5	7.28855e-54	Up-regulated
NDUFS5	Pig	3.15342e-58	2.32777	124	27	1.15242e-53	Up-regulated
SSPN	Pig	4.07791e-58	1.22741	317	0.15	1.49027e-53	Up-regulated
ENSSSCG00000015814	Pig	4.59415e-58	4.64526	62	2	1.67893e-53	Up-regulated
MCPH1	Pig	4.84175e-58	1.8306	152	42	1.76942e-53	Up-regulated
DOCK4	Pig	5.67043e-58	1.19842	314	153	2.07226e-53	Up-regulated
SAP18	Pig	6.34077e-58	2.21911	107	19	2.31723e-53	Up-regulated
TIGAR	Pig	6.49995e-58	1.0724	293	0.13	2.37541e-53	Up-regulated
HIVEP1	Pig	6.50317e-58	1.70668	178	57	2.37658e-53	Up-regulated
AKR1D1	Pig	1.13421e-57	3.38894	0.09	12	4.14497e-53	Up-regulated
SS18L2	Pig	1.13536e-57	1.80997	129	29	4.14919e-53	Up-regulated
RASGRP1	Pig	1.17516e-57	4.8682	64	3	4.29464e-53	Up-regulated
IFT57	Pig	1.50197e-57	1.69107	182	59	5.48894e-53	Up-regulated
SPIN1	Pig	1.51842e-57	1.15479	326	156	5.54906e-53	Up-regulated
ENSSSCG00000030183	Pig	1.78296e-57	2.33276	114	22	6.51582e-53	Up-regulated
HBS1L	Pig	2.24964e-57	1.04166	0.36	184	8.22132e-53	Up-regulated
CCDC197	Pig	2.3857e-57	3.60287	0.07	5	8.71854e-53	Up-regulated
RPS15A	Pig	2.8035e-57	3.05925	91	13	1.02454e-52	Up-regulated
TRIM26	Pig	3.00079e-57	3.33006	86	11	1.09664e-52	Up-regulated
CTSD	Pig	3.28232e-57	1.26575	0.21	75	1.19952e-52	Up-regulated
NRIP1	Pig	3.36327e-57	1.42084	248	104	1.22911e-52	Up-regulated
ENSSSCG00000009683	Pig	3.75294e-57	1.03155	416	232	1.37151e-52	Up-regulated
CCDC201	Pig	3.90881e-57	3.73016	68	4	1.42847e-52	Up-regulated
KCNJ13	Pig	3.93365e-57	1.97806	127	29	1.43755e-52	Up-regulated
MBOAT2	Pig	4.27065e-57	1.10832	0.28	121	1.56071e-52	Up-regulated
MTPAP	Pig	5.36593e-57	0.880655	0.33	154	1.96098e-52	Up-regulated
DARS1	Pig	5.63322e-57	0.935081	394	206	2.05866e-52	Up-regulated
ACVR2A	Pig	6.21627e-57	0.902939	411	225	2.27174e-52	Up-regulated
CASP7	Pig	6.79499e-57	2.11735	131	32	2.48323e-52	Up-regulated
RRAS	Pig	6.81492e-57	2.27553	107	19	2.49051e-52	Up-regulated
ENSSSCG00000005959	Pig	6.96568e-57	1.22243	333	163	2.54561e-52	Up-regulated
YAF2	Pig	7.58499e-57	0.930733	442	0.25	2.77194e-52	Up-regulated
NDUFA2	Pig	7.75592e-57	1.75995	137	34	2.8344e-52	Up-regulated
HINT1	Pig	8.49921e-57	2.33528	105	18	3.10603e-52	Up-regulated
CCDC126	Pig	9.6037e-57	1.49444	176	56	3.50967e-52	Up-regulated
ADGRD1	Pig	1.0733e-56	1.55876	257	113	3.92239e-52	Up-regulated
GTF3A	Pig	1.07484e-56	3.32922	0.08	9	3.92799e-52	Up-regulated
ZFP36L1	Pig	1.26927e-56	5.15053	62	2	4.63856e-52	Up-regulated
TRMT13	Pig	1.47056e-56	2.04436	134	33	5.37415e-52	Up-regulated
SLC16A4	Pig	1.51489e-56	4.04399	69	5	5.53616e-52	Up-regulated
NDUFB7	Pig	1.81301e-56	2.34919	109	21	6.62563e-52	Up-regulated
ECPAS	Pig	1.85331e-56	0.714986	614	414	6.77292e-52	Up-regulated
ENSSSCG00000004404	Pig	2.08095e-56	6.53753	56	0	7.60483e-52	Up-regulated
EGR1	Pig	2.09813e-56	10.1412	54	0	7.6676e-52	Up-regulated
NKX2-5	Pig	2.55583e-56	2.73477	92	13	9.34028e-52	Up-regulated
ALMS1	Pig	2.78845e-56	1.23977	276	121	1.01904e-51	Up-regulated
ENSSSCG00000016119	Pig	2.92925e-56	1.31458	292	136	1.07049e-51	Up-regulated
IPMK	Pig	3.03916e-56	2.17875	121	27	1.11066e-51	Up-regulated
RPS3	Pig	3.20404e-56	1.84791	141	37	1.17092e-51	Up-regulated
UNC45B	Pig	3.44161e-56	1.25104	245	98	1.25774e-51	Up-regulated
FAM120C	Pig	3.67643e-56	1.30899	221	84	1.34355e-51	Up-regulated
FXYD1	Human	3.93388e-56	3.05717	77	7	1.43763e-51	Up-regulated
NUDT13	Pig	4.62838e-56	2.80588	99	16	1.69144e-51	Up-regulated
TPT1	Pig	4.91615e-56	1.34411	254	107	1.79661e-51	Up-regulated
ENSSSCG00000017754	Pig	5.68176e-56	5.39368	55	0	2.0764e-51	Up-regulated
DNAJB9	Pig	6.20247e-56	2.60545	92	14	2.26669e-51	Up-regulated
STXBP5	Pig	6.80818e-56	1.30956	304	145	2.48805e-51	Up-regulated
PMEPA1	Pig	6.83254e-56	3.76666	72	6	2.49695e-51	Up-regulated
RBM15	Pig	7.82332e-56	1.75351	143	38	2.85903e-51	Up-regulated
RFC5	Pig	7.92209e-56	1.64697	154	44	2.89513e-51	Up-regulated
RALGAPA2	Pig	1.17147e-55	1.39715	0.28	127	4.28115e-51	Up-regulated
IMMP1L	Pig	1.33061e-55	0.985647	328	161	4.86272e-51	Up-regulated
TRMT10A	Pig	1.36218e-55	1.99192	135	34	4.97808e-51	Up-regulated
B3GLCT	Pig	1.38017e-55	2.41214	119	26	5.04384e-51	Up-regulated
GTDC1	Pig	1.38769e-55	1.23538	323	0.16	5.07132e-51	Up-regulated
DNAH12	Pig	1.52631e-55	3.04842	82	0.01	5.5779e-51	Up-regulated
MGARP	Pig	2.07171e-55	1.54956	178	58	7.57105e-51	Up-regulated
XPC	Pig	2.13375e-55	1.16169	198	69	7.79781e-51	Up-regulated
TMEM267	Pig	2.51232e-55	1.35686	173	54	9.18127e-51	Up-regulated
ENSSSCG00000012202	Pig	2.54728e-55	0.867081	436	246	9.30903e-51	Up-regulated
TOM1L1	Pig	3.57529e-55	2.26214	133	33	1.30659e-50	Up-regulated
MIB1	Pig	4.16277e-55	0.967391	413	229	1.52129e-50	Up-regulated
ENSSSCG00000004583	Pig	4.39427e-55	1.40787	0.18	59	1.60589e-50	Up-regulated
CTNNB1	Pig	4.48511e-55	0.786895	468	274	1.63908e-50	Up-regulated
ENSSSCG00000033648	Pig	4.48795e-55	2.96726	91	14	1.64012e-50	Up-regulated
UBR2	Pig	4.87296e-55	0.545599	836	719	1.78083e-50	Up-regulated
LMBRD1	Pig	5.27712e-55	1.21429	253	107	1.92853e-50	Up-regulated
HNRNPR	Pig	5.3606e-55	1.00222	416	234	1.95903e-50	Up-regulated
TRAPPC8	Pig	5.36597e-55	1.09922	319	155	1.96099e-50	Up-regulated
RASSF1	Pig	5.42136e-55	4.16264	68	5	1.98124e-50	Up-regulated
CCN1	Pig	6.26096e-55	1.15146	226	88	2.28807e-50	Up-regulated
PTPDC1	Pig	6.43333e-55	2.03699	141	38	2.35106e-50	Up-regulated
NGLY1	Pig	6.68473e-55	1.0298	295	136	2.44293e-50	Up-regulated
C2CD3	Pig	8.07466e-55	1.48632	195	0.07	2.95089e-50	Up-regulated
RAB10	Pig	8.73525e-55	0.856872	465	271	3.1923e-50	Up-regulated
ZMAT3	Pig	1.27688e-54	2.0831	105	0.02	4.66636e-50	Up-regulated
MGAT4A	Pig	1.307e-54	1.39415	265	118	4.77642e-50	Up-regulated
TTC28	Pig	1.86756e-54	0.571979	739	572	6.825e-50	Up-regulated
PSMB9	Pig	2.17394e-54	4.09869	64	4	7.94467e-50	Up-regulated
P2RX4	Pig	2.22209e-54	3.66122	71	6	8.12062e-50	Up-regulated
FAM171B	Pig	2.26244e-54	7.05078	54	1	8.26809e-50	Up-regulated
GLCCI1	Pig	2.26987e-54	3.63385	74	7	8.29523e-50	Up-regulated
PDCD5	Pig	2.3051e-54	2.0841	122	28	8.42401e-50	Up-regulated
AVEN	Pig	2.55874e-54	0.98381	299	138	9.35092e-50	Up-regulated
RPS4X	Pig	2.57872e-54	2.40485	0.1	18	9.42392e-50	Up-regulated
ZNF599	Pig	3.25263e-54	1.80969	0.15	43	1.18867e-49	Up-regulated
XKR9	Pig	3.73329e-54	4.24984	0.06	2	1.36433e-49	Up-regulated
NELL2	Pig	4.10143e-54	2.93759	86	12	1.49887e-49	Up-regulated
RASGEF1C	Pig	4.46362e-54	4.31581	69	5	1.63123e-49	Up-regulated
PRKCI	Pig	4.85184e-54	1.47178	217	84	1.77311e-49	Up-regulated
RBFOX3	Pig	5.52395e-54	4.37809	63	4	2.01873e-49	Up-regulated
E2F3	Pig	6.18724e-54	1.18996	247	103	2.26113e-49	Up-regulated
ENSSSCG00000010734	Pig	7.10627e-54	1.52869	164	51	2.59699e-49	Up-regulated
LAMB1	Pig	7.2537e-54	4.02084	63	3	2.65086e-49	Up-regulated
NUBPL	Pig	8.49959e-54	1.11662	304	144	3.10618e-49	Up-regulated
MINDY3	Pig	8.7264e-54	1.76748	145	41	3.18906e-49	Up-regulated
SLC35B3	Pig	8.75524e-54	2.07544	129	32	3.1996e-49	Up-regulated
NMRK2	Pig	1.04893e-53	1.08264	269	119	3.83331e-49	Up-regulated
SEL1L	Pig	1.05227e-53	1.23049	0.24	99	3.84551e-49	Up-regulated
SIPA1L1	Pig	1.06995e-53	1.9189	0.14	39	3.91015e-49	Up-regulated
PTGFR	Pig	1.61633e-53	3.06869	92	15	5.90689e-49	Up-regulated
SELENOT	Pig	1.8664e-53	0.98225	289	132	6.82075e-49	Up-regulated
PPM1L	Pig	2.11834e-53	1.11412	0.29	133	7.74147e-49	Up-regulated
ENSSSCG00000012566	Pig	2.65949e-53	1.35541	178	0.06	9.7191e-49	Up-regulated
TBC1D12	Pig	2.73014e-53	1.61279	224	92	9.97728e-49	Up-regulated
ENSSSCG00000007524	Pig	3.71493e-53	1.01495	342	173	1.35762e-48	Up-regulated
ARFGAP3	Pig	3.73695e-53	1.1861	242	0.1	1.36567e-48	Up-regulated
PIKFYVE	Pig	3.93822e-53	1.67579	188	68	1.43922e-48	Up-regulated
POSTN	Pig	3.99244e-53	1.81731	136	36	1.45904e-48	Up-regulated
LEO1	Pig	4.01048e-53	1.69745	141	39	1.46563e-48	Up-regulated
ENSSSCG00000044127	Pig	4.53808e-53	2.78411	104	0.02	1.65844e-48	Up-regulated
ERP44	Pig	5.46479e-53	0.964881	316	152	1.99711e-48	Up-regulated
SRBD1	Pig	5.61526e-53	0.941413	387	0.21	2.0521e-48	Up-regulated
PKNOX2	Pig	6.10309e-53	4.30342	63	4	2.23037e-48	Up-regulated
ATP8A1	Pig	6.20253e-53	0.764741	623	443	2.26671e-48	Up-regulated
TNIK	Pig	6.8552e-53	0.718585	0.57	374	2.50523e-48	Up-regulated
SLC35A5	Pig	6.95626e-53	2.32522	109	23	2.54217e-48	Up-regulated
ABI3BP	Pig	6.97243e-53	5.25197	58	2	2.54808e-48	Up-regulated
CCDC15	Pig	7.15775e-53	1.74143	166	54	2.6158e-48	Up-regulated
ENSSSCG00000033871	Pig	7.6192e-53	1.61158	144	0.04	2.78444e-48	Up-regulated
NECTIN3	Pig	8.01078e-53	2.39664	0.11	24	2.92754e-48	Up-regulated
ASPRV1	Pig	8.20646e-53	1.80786	168	55	2.99905e-48	Up-regulated
SATB2	Pig	8.78088e-53	5.15266	58	2	3.20897e-48	Up-regulated
TLE4	Pig	1.02475e-52	1.2401	268	121	3.74496e-48	Up-regulated
ENSSSCG00000011729	Pig	1.05293e-52	1.24199	242	101	3.84793e-48	Up-regulated
HIBCH	Pig	1.39283e-52	0.769933	384	204	5.09008e-48	Up-regulated
SUSD1	Pig	1.55512e-52	2.98977	88	13	5.6832e-48	Up-regulated
ARHGEF12	Pig	1.631e-52	0.683061	629	443	5.96048e-48	Up-regulated
EPS15L1	Pig	1.82984e-52	1.43349	228	93	6.68714e-48	Up-regulated
TFRC	Pig	2.34182e-52	0.756125	387	208	8.55819e-48	Up-regulated
NIN	Pig	2.7553e-52	1.01463	382	208	1.00693e-47	Up-regulated
ENSSSCG00000011603	Pig	3.10031e-52	2.21147	108	23	1.13301e-47	Up-regulated
CCDC50	Pig	3.15831e-52	1.22751	258	114	1.1542e-47	Up-regulated
ADAM10	Pig	4.10477e-52	0.897363	332	166	1.50009e-47	Up-regulated
HSD17B4	Pig	4.30271e-52	0.890223	0.38	204	1.57242e-47	Up-regulated
GALK2	Pig	5.67917e-52	1.5239	173	59	2.07545e-47	Up-regulated
AARS1	Pig	5.85428e-52	1.53714	212	84	2.13945e-47	Up-regulated
UBE2D3	Pig	5.93872e-52	0.98505	336	0.17	2.1703e-47	Up-regulated
ENSSSCG00000039473	Pig	5.94337e-52	0.939016	483	291	2.172e-47	Up-regulated
ANXA6	Pig	6.01308e-52	1.61532	212	83	2.19748e-47	Up-regulated
ENSSSCG00000008576	Pig	7.65385e-52	1.66	209	82	2.7971e-47	Up-regulated
TSGA10	Pig	8.33625e-52	1.59859	0.14	39	3.04648e-47	Up-regulated
OLFM1	Pig	9.25081e-52	4.60641	61	3	3.38071e-47	Up-regulated
CDC27	Pig	1.01134e-51	0.937309	404	225	3.69595e-47	Up-regulated
ZHX3	Pig	1.24393e-51	1.74429	164	55	4.54594e-47	Up-regulated
SLC38A2	Pig	1.24961e-51	0.651302	528	339	4.56669e-47	Up-regulated
WDFY2	Pig	1.34627e-51	1.57964	212	84	4.91995e-47	Up-regulated
APLF	Pig	1.3484e-51	1.74904	152	46	4.92773e-47	Up-regulated
RHOT1	Pig	1.53603e-51	0.6255	0.68	493	5.61341e-47	Up-regulated
LYST	Pig	1.83135e-51	0.793522	449	262	6.69269e-47	Up-regulated
SPAG11	Pig	2.0594e-51	2.08885	131	35	7.52607e-47	Up-regulated
PFN2	Pig	2.57281e-51	1.41669	161	52	9.40233e-47	Up-regulated
ENSSSCG00000003253	Pig	2.5907e-51	1.70009	163	53	9.46772e-47	Up-regulated
SPCS3	Pig	2.81023e-51	1.43332	181	64	1.027e-46	Up-regulated
METTL15	Pig	2.91458e-51	1.16387	241	102	1.06513e-46	Up-regulated
ZDHHC2	Pig	3.30312e-51	0.934661	481	0.3	1.20712e-46	Up-regulated
CANX	Pig	3.35628e-51	0.87826	327	161	1.22655e-46	Up-regulated
SERF2	Human	3.52918e-51	2.79533	73	8	1.28974e-46	Up-regulated
BLZF1	Pig	3.90882e-51	1.57507	158	0.05	1.42848e-46	Up-regulated
RPS6KC1	Pig	4.12938e-51	0.982954	426	0.25	1.50908e-46	Up-regulated
ANKMY2	Pig	4.42713e-51	1.5514	0.15	45	1.61789e-46	Up-regulated
NDUFC2	Pig	4.61939e-51	1.79907	129	34	1.68816e-46	Up-regulated
IKZF2	Pig	4.94746e-51	1.28633	247	107	1.80805e-46	Up-regulated
ROMO1	Pig	5.45511e-51	2.05532	107	22	1.99357e-46	Up-regulated
MRPS27	Pig	5.53144e-51	0.836187	406	228	2.02146e-46	Up-regulated
EVI5	Pig	5.87827e-51	0.922014	417	242	2.14821e-46	Up-regulated
SPPL2A	Pig	5.9453e-51	0.711806	393	212	2.17271e-46	Up-regulated
PGAP1	Pig	5.99732e-51	1.82191	152	47	2.19172e-46	Up-regulated
DDB2	Pig	6.39876e-51	1.95655	155	49	2.33843e-46	Up-regulated
TMLHE	Pig	6.60017e-51	2.90066	83	12	2.41203e-46	Up-regulated
PTER	Pig	6.70193e-51	5.2649	55	2	2.44922e-46	Up-regulated
ENSSSCG00000010432	Pig	6.86594e-51	2.86557	75	9	2.50916e-46	Up-regulated
ENSSSCG00000006777	Pig	7.49176e-51	9.18507	49	0	2.73786e-46	Up-regulated
SHQ1	Pig	7.6699e-51	1.87169	117	28	2.80296e-46	Up-regulated
C11orf52	Pig	7.91596e-51	2.68503	72	7	2.89289e-46	Up-regulated
ENSSSCG00000039612	Pig	9.7573e-51	1.89423	0.1	19	3.5658e-46	Up-regulated
MARK1	Pig	1.02163e-50	0.634525	461	262	3.73355e-46	Up-regulated
CDC40	Pig	1.02981e-50	0.855473	324	0.16	3.76345e-46	Up-regulated
MARS2	Pig	1.27415e-50	2.23681	114	27	4.65637e-46	Up-regulated
KCNA4	Pig	1.34432e-50	2.33171	75	9	4.91283e-46	Up-regulated
BTF3	Pig	1.65669e-50	1.32115	171	57	6.05438e-46	Up-regulated
SENP6	Pig	1.83935e-50	0.711967	0.64	466	6.72189e-46	Up-regulated
CCDC39	Pig	1.95797e-50	3.59774	61	4	7.15541e-46	Up-regulated
TLE3	Pig	1.97657e-50	6.34492	0.05	0	7.22339e-46	Up-regulated
SLC4A4	Pig	2.13777e-50	1.0623	345	183	7.81248e-46	Up-regulated
GHITM	Pig	2.21205e-50	1.00148	269	121	8.08394e-46	Up-regulated
ENSSSCG00000039009	Pig	2.2859e-50	3.37533	84	13	8.35384e-46	Up-regulated
ACCSL	Pig	2.79499e-50	1.00338	221	88	1.02143e-45	Up-regulated
SCP2	Pig	2.81869e-50	1.16137	299	146	1.03009e-45	Up-regulated
ENSSSCG00000020790	Pig	4.23197e-50	1.75989	141	41	1.54658e-45	Up-regulated
ZNF274	Pig	5.10957e-50	1.17972	264	118	1.86729e-45	Up-regulated
ARPC2	Pig	6.0686e-50	1.17105	259	118	2.21777e-45	Up-regulated
GSDME	Pig	6.81841e-50	1.08346	218	87	2.49179e-45	Up-regulated
ENSSSCG00000038633	Pig	7.10568e-50	1.89944	122	31	2.59677e-45	Up-regulated
POC5	Pig	7.45348e-50	1.69708	141	41	2.72387e-45	Up-regulated
RNF7	Pig	7.70107e-50	1.19731	186	67	2.81436e-45	Up-regulated
ABHD12	Pig	1.0202e-49	2.28858	132	37	3.72833e-45	Up-regulated
TARBP1	Pig	1.5813e-49	0.92976	313	152	5.77887e-45	Up-regulated
NARS2	Pig	1.60468e-49	0.890495	297	141	5.86429e-45	Up-regulated
PTK2	Pig	1.69295e-49	0.750933	584	404	6.18687e-45	Up-regulated
KIAA1109	Pig	1.74885e-49	1.02613	377	212	6.39117e-45	Up-regulated
ENSSSCG00000035544	Pig	1.85565e-49	0.763764	438	254	6.78149e-45	Up-regulated
B4GALT5	Pig	1.88762e-49	1.17289	365	206	6.8983e-45	Up-regulated
ENSSSCG00000015645	Pig	2.88091e-49	2.00856	108	24	1.05283e-44	Up-regulated
ZDHHC21	Pig	2.88326e-49	1.97596	115	28	1.05369e-44	Up-regulated
PLAA	Pig	2.98885e-49	0.834646	0.35	183	1.09227e-44	Up-regulated
TRIM44	Pig	3.1077e-49	0.760294	538	355	1.13571e-44	Up-regulated
RGS3	Pig	3.32917e-49	7.54467	49	0	1.21665e-44	Up-regulated
ETFA	Pig	3.42021e-49	0.78238	492	0.31	1.24991e-44	Up-regulated
UBE2L6	Pig	3.79737e-49	8.77893	47	0	1.38775e-44	Up-regulated
ELOVL6	Pig	3.86135e-49	1.11584	176	61	1.41113e-44	Up-regulated
HSPH1	Pig	4.37518e-49	3.38205	67	6	1.59891e-44	Up-regulated
INTS9	Pig	4.53107e-49	1.59919	157	51	1.65588e-44	Up-regulated
CPEB3	Pig	5.46971e-49	0.755427	661	493	1.99891e-44	Up-regulated
C9orf85	Pig	5.49765e-49	1.23547	197	75	2.00912e-44	Up-regulated
ENSSSCG00000026414	Pig	5.92271e-49	2.94396	74	9	2.16446e-44	Up-regulated
TRAPPC5	Pig	6.00048e-49	4.39018	56	3	2.19288e-44	Up-regulated
TTC7B	Pig	6.17627e-49	0.93971	483	299	2.25712e-44	Up-regulated
ZNF624	Pig	6.26481e-49	1.65871	175	63	2.28947e-44	Up-regulated
ZNF207	Pig	6.91498e-49	0.686502	584	392	2.52708e-44	Up-regulated
C8orf34	Pig	7.18505e-49	2.15716	0.12	31	2.62578e-44	Up-regulated
NDUFAF4	Pig	7.83005e-49	2.4646	76	0.01	2.86149e-44	Up-regulated
FEZ2	Pig	8.59215e-49	2.91406	82	13	3.14e-44	Up-regulated
ENSSSCG00000023850	Pig	1.05306e-48	1.23419	167	57	3.84843e-44	Up-regulated
FGGY	Pig	1.13651e-48	1.09914	321	165	4.15337e-44	Up-regulated
KDM1B	Pig	1.41769e-48	2.89325	0.08	12	5.18096e-44	Up-regulated
ANGEL2	Pig	1.64297e-48	1.20917	231	98	6.00425e-44	Up-regulated
FRMD6	Pig	1.70256e-48	3.5405	67	7	6.22201e-44	Up-regulated
CSPP1	Pig	1.70322e-48	0.841578	441	263	6.2244e-44	Up-regulated
ATF5	Pig	1.7405e-48	3.98865	58	4	6.36067e-44	Up-regulated
KIAA0586	Pig	1.76394e-48	1.30759	196	75	6.4463e-44	Up-regulated
GATB	Pig	1.78423e-48	0.809654	259	115	6.52048e-44	Up-regulated
DLG1	Pig	1.96819e-48	0.56941	712	543	7.19276e-44	Up-regulated
REV3L	Pig	2.89476e-48	0.842845	537	374	1.05789e-43	Up-regulated
ANKDD1B	Pig	2.93564e-48	3.15722	0.07	8	1.07283e-43	Up-regulated
ENSSSCG00000003046	Pig	4.29751e-48	2.44226	88	16	1.57052e-43	Up-regulated
WSB2	Pig	4.30737e-48	1.30214	216	89	1.57413e-43	Up-regulated
ENSSSCG00000002260	Pig	4.81321e-48	0.603463	752	635	1.75899e-43	Up-regulated
GPR63	Pig	5.26159e-48	4.91328	53	2	1.92285e-43	Up-regulated
FCHSD1	Pig	5.38678e-48	4.73575	55	3	1.9686e-43	Up-regulated
FAM189A2	Pig	5.73892e-48	0.599506	743	577	2.09729e-43	Up-regulated
EML1	Pig	6.42938e-48	1.27063	282	137	2.34962e-43	Up-regulated
HEPACAM2	Pig	6.92367e-48	1.67295	136	0.04	2.53026e-43	Up-regulated
RPLP2	Pig	8.04302e-48	1.49241	144	44	2.93932e-43	Up-regulated
GABRB1	Pig	8.57152e-48	0.916542	295	143	3.13246e-43	Up-regulated
ENSSSCG00000009138	Pig	1.15138e-47	2.3792	88	16	4.20772e-43	Up-regulated
MAP1LC3A	Pig	1.3648e-47	1.03078	219	0.09	4.98765e-43	Up-regulated
SMG7	Pig	1.38177e-47	0.861675	366	199	5.04969e-43	Up-regulated
CTDSPL	Pig	1.46634e-47	0.884859	0.46	281	5.35874e-43	Up-regulated
SMARCAL1	Pig	1.56007e-47	1.26182	206	82	5.70129e-43	Up-regulated
BNIP3	Pig	1.56369e-47	1.17685	242	108	5.71452e-43	Up-regulated
HSD11B1	Pig	1.60212e-47	4.09932	59	4	5.85494e-43	Up-regulated
INVS	Pig	1.78669e-47	0.799746	0.36	191	6.52946e-43	Up-regulated
ENSSSCG00000000359	Pig	1.8029e-47	2.04764	105	24	6.5887e-43	Up-regulated
PPHLN1	Pig	2.17264e-47	1.03171	278	134	7.93991e-43	Up-regulated
ENSSSCG00000001924	Pig	2.19552e-47	0.602111	716	0.56	8.02352e-43	Up-regulated
LRPPRC	Pig	2.25287e-47	0.894856	329	169	8.2331e-43	Up-regulated
TRERF1	Pig	2.61445e-47	2.17465	127	36	9.55452e-43	Up-regulated
ZNF891	Pig	2.72885e-47	1.50093	123	32	9.97258e-43	Up-regulated
GTF2F2	Pig	3.0646e-47	1.31413	228	0.1	1.11996e-42	Up-regulated
ARPC4	Pig	3.40716e-47	2.05627	0.11	27	1.24515e-42	Up-regulated
ENSSSCG00000032060	Pig	3.67183e-47	2.44933	77	11	1.34187e-42	Up-regulated
WDR7	Pig	3.85428e-47	0.898516	411	241	1.40855e-42	Up-regulated
SMAD4	Pig	4.38651e-47	0.859409	423	251	1.60305e-42	Up-regulated
LIMK1	Pig	5.33092e-47	2.85838	72	9	1.94818e-42	Up-regulated
ENSSSCG00000007080	Pig	5.4258e-47	0.856561	373	203	1.98286e-42	Up-regulated
PCF11	Pig	5.89039e-47	1.26817	247	113	2.15264e-42	Up-regulated
PKP2	Pig	6.4749e-47	0.561021	836	0.74	2.36625e-42	Up-regulated
STC2	Pig	6.66827e-47	0.74516	504	324	2.43692e-42	Up-regulated
SMDT1	Pig	7.45592e-47	1.44763	134	39	2.72477e-42	Up-regulated
ZRANB3	Pig	8.54367e-47	1.36112	165	57	3.12228e-42	Up-regulated
RND3	Pig	1.04928e-46	1.28995	207	85	3.83461e-42	Up-regulated
ENSSSCG00000023041	Pig	1.1618e-46	1.70196	139	43	4.2458e-42	Up-regulated
STON2	Pig	1.23706e-46	3.59184	54	3	4.52083e-42	Up-regulated
DUSP19	Pig	1.61475e-46	3.51706	61	5	5.90111e-42	Up-regulated
WAC	Pig	1.81068e-46	0.754581	526	345	6.61712e-42	Up-regulated
RBM18	Pig	1.87364e-46	1.5859	144	46	6.8472e-42	Up-regulated
ATM	Pig	1.90311e-46	0.929866	0.29	141	6.95492e-42	Up-regulated
DCAKD	Pig	2.01069e-46	0.998137	376	211	7.34807e-42	Up-regulated
MGLL	Pig	2.10003e-46	1.0529	293	147	7.67457e-42	Up-regulated
SERTAD1	Pig	2.71666e-46	2.72128	73	0.01	9.92803e-42	Up-regulated
REL	Pig	2.83536e-46	0.961919	258	118	1.03618e-41	Up-regulated
TRIM56	Pig	3.03401e-46	6.40746	46	1	1.10878e-41	Up-regulated
ENSSSCG00000036877	Pig	3.66452e-46	1.59557	134	0.04	1.3392e-41	Up-regulated
SATB1	Pig	3.98056e-46	1.19071	206	84	1.4547e-41	Up-regulated
SCARB2	Pig	4.36187e-46	0.906788	0.34	181	1.59404e-41	Up-regulated
TMEM33	Pig	4.99957e-46	1.5938	138	42	1.82709e-41	Up-regulated
ZNF148	Pig	7.01546e-46	0.647858	506	322	2.5638e-41	Up-regulated
STX18	Pig	7.69558e-46	0.955765	289	141	2.81235e-41	Up-regulated
ENSSSCG00000050320	Pig	7.86365e-46	1.62677	124	34	2.87377e-41	Up-regulated
ENSSSCG00000039071	Pig	9.24263e-46	5.01232	0.05	2	3.37772e-41	Up-regulated
RHOA	Pig	1.14309e-45	0.964386	495	322	4.17741e-41	Up-regulated
CARNMT1	Pig	1.20356e-45	1.25351	182	0.07	4.39842e-41	Up-regulated
KLHL7	Pig	1.26073e-45	1.81837	144	47	4.60735e-41	Up-regulated
BLVRA	Pig	1.26628e-45	2.46899	94	0.02	4.62762e-41	Up-regulated
FAM91A1	Pig	1.30306e-45	1.14945	232	102	4.76203e-41	Up-regulated
PIBF1	Pig	1.67447e-45	0.923312	299	149	6.11936e-41	Up-regulated
RPL11	Human	1.82588e-45	4.15466	56	4	6.67267e-41	Up-regulated
ENSSSCG00000003421	Pig	1.85558e-45	4.13837	57	4	6.78121e-41	Up-regulated
ENSSSCG00000023596	Pig	1.90872e-45	2.04805	0.1	22	6.97542e-41	Up-regulated
TTLL5	Pig	2.2612e-45	1.39021	173	64	8.26357e-41	Up-regulated
PDSS2	Pig	2.31898e-45	1.16975	179	67	8.47472e-41	Up-regulated
DCTN4	Pig	2.31911e-45	0.971993	276	133	8.47519e-41	Up-regulated
ENSSSCG00000011676	Pig	2.5418e-45	1.23516	174	64	9.28902e-41	Up-regulated
PIGU	Pig	2.93276e-45	0.83614	304	154	1.07178e-40	Up-regulated
GATA6	Pig	3.39097e-45	0.598628	704	542	1.23923e-40	Up-regulated
ZDHHC17	Pig	3.5e-45	0.709494	536	361	1.27908e-40	Up-regulated
ENSSSCG00000041783	Pig	3.65571e-45	1.51097	0.13	38	1.33598e-40	Up-regulated
ENSSSCG00000038327	Pig	3.84278e-45	1.94458	101	23	1.40434e-40	Up-regulated
CCNT2	Pig	4.07499e-45	0.705362	0.49	317	1.48921e-40	Up-regulated
NKTR	Pig	4.34895e-45	0.721315	528	342	1.58932e-40	Up-regulated
LRP2BP	Pig	5.49754e-45	0.956294	319	166	2.00908e-40	Up-regulated
TNNT1	Pig	5.594e-45	1.17092	207	85	2.04433e-40	Up-regulated
IFT74	Pig	6.46686e-45	1.72208	134	41	2.36332e-40	Up-regulated
ENY2	Pig	6.59112e-45	1.44388	137	42	2.40873e-40	Up-regulated
TMEM19	Pig	6.9416e-45	0.794624	338	179	2.53681e-40	Up-regulated
CPD	Pig	7.22396e-45	1.65775	0.13	39	2.64e-40	Up-regulated
CAMK1	Pig	7.24484e-45	3.43678	55	4	2.64763e-40	Up-regulated
MOCS2	Pig	8.10259e-45	0.753256	376	209	2.96109e-40	Up-regulated
KIDINS220	Pig	1.29462e-44	0.764346	421	246	4.73119e-40	Up-regulated
RPS25	Pig	1.44652e-44	1.61463	0.13	39	5.28632e-40	Up-regulated
RPN2	Pig	1.63672e-44	1.42608	163	59	5.98138e-40	Up-regulated
HPCAL1	Pig	1.63884e-44	2.88044	77	13	5.98915e-40	Up-regulated
ENSSSCG00000038708	Pig	1.83582e-44	1.21449	174	65	6.709e-40	Up-regulated
LTBP1	Pig	2.13236e-44	1.46701	192	0.08	7.79271e-40	Up-regulated
ENSSSCG00000049039	Pig	2.82441e-44	1.73037	0.12	34	1.03218e-39	Up-regulated
HSPG2	Pig	3.07616e-44	1.07576	343	194	1.12418e-39	Up-regulated
COX17	Pig	3.29126e-44	2.32792	85	16	1.20279e-39	Up-regulated
SDC2	Pig	3.51928e-44	3.96848	54	4	1.28612e-39	Up-regulated
ATP6V1F	Pig	3.77215e-44	2.70561	71	0.01	1.37853e-39	Up-regulated
ENSSSCG00000031838	Pig	3.88456e-44	1.49877	156	55	1.41961e-39	Up-regulated
SELENOH	Pig	4.17941e-44	2.66331	78	13	1.52736e-39	Up-regulated
IRAK3	Pig	4.20913e-44	2.73759	0.08	14	1.53823e-39	Up-regulated
MRS2	Pig	4.31698e-44	0.889314	214	0.09	1.57764e-39	Up-regulated
SLC35F5	Pig	5.63629e-44	0.961403	359	202	2.05978e-39	Up-regulated
TMOD3	Pig	6.00512e-44	1.16268	0.21	0.09	2.19457e-39	Up-regulated
UBXN2A	Pig	6.24671e-44	0.799294	336	178	2.28286e-39	Up-regulated
MIPOL1	Pig	6.91804e-44	0.750074	451	281	2.5282e-39	Up-regulated
OSGIN1	Pig	7.16612e-44	2.23636	76	12	2.61886e-39	Up-regulated
AGO1	Pig	8.53849e-44	0.574421	0.63	446	3.12039e-39	Up-regulated
TERF2IP	Pig	9.52199e-44	1.14766	192	77	3.47981e-39	Up-regulated
RFC2	Pig	9.80845e-44	2.12279	102	25	3.5845e-39	Up-regulated
ZNF461	Pig	1.04014e-43	1.23136	166	61	3.80119e-39	Up-regulated
EIF4EBP1	Pig	1.14705e-43	2.91046	0.07	0.01	4.1919e-39	Up-regulated
PYGO1	Pig	1.20074e-43	4.78838	0.05	2	4.38809e-39	Up-regulated
S100A10	Pig	1.28505e-43	8.90642	41	0	4.69623e-39	Up-regulated
CDKL3	Pig	1.50516e-43	1.62707	111	29	5.50061e-39	Up-regulated
GPR176	Pig	1.55757e-43	1.07518	223	97	5.69213e-39	Up-regulated
MRPL3	Pig	1.65251e-43	1.02981	221	96	6.03911e-39	Up-regulated
TMBIM6	Pig	1.72756e-43	1.23029	189	75	6.31338e-39	Up-regulated
WASHC4	Pig	2.16784e-43	1.1841	241	114	7.92239e-39	Up-regulated
ENSSSCG00000003520	Pig	2.18458e-43	0.98631	331	182	7.98354e-39	Up-regulated
PSMF1	Pig	2.40832e-43	0.604781	433	253	8.80122e-39	Up-regulated
RUSC2	Pig	2.50416e-43	1.023	285	144	9.15144e-39	Up-regulated
MIGA1	Pig	2.85668e-43	0.758447	386	219	1.04397e-38	Up-regulated
MAP3K1	Pig	2.93144e-43	1.69854	119	34	1.0713e-38	Up-regulated
ENSSSCG00000004307	Pig	3.0081e-43	1.20973	176	67	1.09931e-38	Up-regulated
FBXW8	Pig	3.08609e-43	0.59964	0.69	527	1.12781e-38	Up-regulated
VCP	Pig	3.14825e-43	0.642977	451	272	1.15053e-38	Up-regulated
DOCK9	Pig	3.50096e-43	1.7295	104	26	1.27943e-38	Up-regulated
AKIRIN1	Pig	3.99872e-43	1.00488	198	81	1.46133e-38	Up-regulated
CYCS	Pig	4.49796e-43	1.05668	202	83	1.64378e-38	Up-regulated
CCDC170	Pig	4.55116e-43	3.73383	59	6	1.66322e-38	Up-regulated
ENSSSCG00000025224	Pig	4.91885e-43	0.574989	584	407	1.79759e-38	Up-regulated
ZNF654	Human	4.94135e-43	2.97063	58	5	1.80582e-38	Up-regulated
SPATA1	Pig	4.96667e-43	1.46263	155	55	1.81507e-38	Up-regulated
DDHD2	Pig	5.00962e-43	1.19688	192	77	1.83077e-38	Up-regulated
CAT	Pig	5.03624e-43	1.34701	155	55	1.84049e-38	Up-regulated
YLPM1	Pig	5.39872e-43	1.31129	187	75	1.97296e-38	Up-regulated
SLC4A7	Pig	5.40452e-43	2.11559	109	29	1.97508e-38	Up-regulated
BAG2	Pig	5.64508e-43	1.81856	0.11	29	2.063e-38	Up-regulated
PLOD1	Pig	5.71912e-43	2.80568	69	0.01	2.09005e-38	Up-regulated
FRYL	Pig	7.16461e-43	0.937903	326	179	2.61831e-38	Up-regulated
IPO7	Pig	7.77293e-43	1.15888	227	103	2.84062e-38	Up-regulated
SH3GLB1	Pig	8.16294e-43	0.722196	436	267	2.98315e-38	Up-regulated
ANO3	Pig	9.20092e-43	3.02976	66	9	3.36248e-38	Up-regulated
APBB2	Pig	9.53683e-43	0.961538	0.29	151	3.48524e-38	Up-regulated
DENND1B	Pig	9.79019e-43	0.831701	421	253	3.57783e-38	Up-regulated
UQCRFS1	Pig	1.02449e-42	1.01731	218	95	3.74399e-38	Up-regulated
ARSK	Pig	1.33781e-42	2.03074	77	13	4.88904e-38	Up-regulated
GARS1	Pig	1.56562e-42	1.55509	0.13	41	5.72157e-38	Up-regulated
HTR2B	Pig	1.63611e-42	2.37855	77	13	5.97915e-38	Up-regulated
ENSSSCG00000001970	Pig	1.83782e-42	1.69093	135	44	6.71632e-38	Up-regulated
LRRC7	Pig	2.04449e-42	2.54453	95	22	7.47157e-38	Up-regulated
ITGA7	Pig	2.10104e-42	0.745683	0.28	139	7.67824e-38	Up-regulated
CBR4	Pig	2.14329e-42	1.42983	124	37	7.83264e-38	Up-regulated
C1orf122	Pig	2.21852e-42	1.8747	85	17	8.10759e-38	Up-regulated
DUSP4	Pig	2.5475e-42	5.46803	46	2	9.30982e-38	Up-regulated
TMEM184C	Pig	2.62899e-42	1.26522	192	79	9.60763e-38	Up-regulated
SMIM7	Pig	2.77547e-42	1.29607	191	79	1.0143e-37	Up-regulated
APLP2	Pig	2.80369e-42	0.867077	337	184	1.02461e-37	Up-regulated
CAVIN2	Pig	2.97013e-42	1.48015	137	45	1.08543e-37	Up-regulated
PIP5K1A	Pig	3.32979e-42	0.960159	309	164	1.21687e-37	Up-regulated
FAM227B	Pig	3.6821e-42	1.0452	198	83	1.34562e-37	Up-regulated
PSMA5	Pig	4.84877e-42	1.19181	129	0.04	1.77198e-37	Up-regulated
TTC8	Pig	4.88864e-42	6.00904	43	1	1.78655e-37	Up-regulated
PRCP	Pig	5.2798e-42	1.99779	112	31	1.9295e-37	Up-regulated
PSMB8	Pig	6.40983e-42	8.75323	0.04	0	2.34247e-37	Up-regulated
CYBRD1	Pig	6.50877e-42	6.79325	41	0	2.37863e-37	Up-regulated
ENSSSCG00000033566	Pig	7.20596e-42	2.63378	69	0.01	2.63342e-37	Up-regulated
RPS23	Pig	7.20918e-42	2.51593	67	9	2.6346e-37	Up-regulated
VARS1	Pig	7.36474e-42	1.4653	134	43	2.69145e-37	Up-regulated
DDX18	Pig	7.57511e-42	0.966512	185	74	2.76832e-37	Up-regulated
PPP1R3E	Pig	7.58859e-42	1.53102	105	27	2.77325e-37	Up-regulated
DPCD	Pig	7.95254e-42	1.62718	113	32	2.90626e-37	Up-regulated
CD58	Pig	9.19704e-42	1.02648	251	119	3.36106e-37	Up-regulated
MBOAT1	Pig	9.32957e-42	2.51078	84	17	3.40949e-37	Up-regulated
CEP290	Pig	9.33326e-42	1.53027	117	33	3.41084e-37	Up-regulated
HNRNPU	Pig	1.0784e-41	0.684128	485	315	3.94101e-37	Up-regulated
SUPT3H	Pig	1.23779e-41	0.707924	455	284	4.5235e-37	Up-regulated
MYSM1	Pig	1.24603e-41	0.717302	425	258	4.55363e-37	Up-regulated
VPS54	Pig	1.42561e-41	0.692532	544	375	5.2099e-37	Up-regulated
ZFP82	Pig	1.42701e-41	2.37251	83	16	5.21502e-37	Up-regulated
CENPP	Pig	1.48112e-41	1.04428	0.3	159	5.41277e-37	Up-regulated
STAM	Pig	1.56628e-41	1.27278	164	61	5.72397e-37	Up-regulated
NAA30	Pig	1.57624e-41	1.37937	166	63	5.76038e-37	Up-regulated
CEP44	Pig	1.58972e-41	2.85984	65	9	5.80964e-37	Up-regulated
LYSMD3	Pig	1.6152e-41	1.47796	0.15	53	5.90276e-37	Up-regulated
XRN2	Pig	1.81628e-41	0.757098	399	232	6.63759e-37	Up-regulated
PPA1	Pig	2.01651e-41	3.18404	59	6	7.36933e-37	Up-regulated
ZFC3H1	Pig	2.03414e-41	0.681978	454	284	7.43375e-37	Up-regulated
WRN	Pig	2.23846e-41	1.42219	166	64	8.18044e-37	Up-regulated
TSPAN2	Pig	2.27701e-41	3.16819	59	6	8.32134e-37	Up-regulated
IMPA1	Pig	2.32514e-41	1.37244	119	35	8.49723e-37	Up-regulated
LRP6	Pig	2.47934e-41	0.810668	353	199	9.06073e-37	Up-regulated
ENSSSCG00000045560	Pig	2.55651e-41	1.80094	131	42	9.34277e-37	Up-regulated
TRIM2	Pig	2.71185e-41	0.637003	437	0.26	9.91044e-37	Up-regulated
FAM135A	Pig	2.72042e-41	0.722954	422	255	9.94177e-37	Up-regulated
TOB1	Human	2.7382e-41	1.13412	188	77	1.00068e-36	Up-regulated
ACADL	Pig	3.10441e-41	0.78479	308	0.16	1.13451e-36	Up-regulated
RPS18	Pig	3.12198e-41	1.71556	111	31	1.14093e-36	Up-regulated
DNAJC13	Pig	3.27698e-41	0.73391	387	225	1.19757e-36	Up-regulated
FIG4	Pig	3.47374e-41	0.978975	265	131	1.26948e-36	Up-regulated
TAF10	Pig	3.72056e-41	2.26034	69	0.01	1.35968e-36	Up-regulated
PTPN11	Pig	3.91335e-41	1.03511	258	125	1.43013e-36	Up-regulated
POLR1F	Pig	4.18124e-41	1.16373	205	89	1.52803e-36	Up-regulated
FAM8A1	Pig	4.58181e-41	2.5793	0.07	11	1.67442e-36	Up-regulated
ST6GAL1	Pig	4.58844e-41	6.8037	0.04	0	1.67685e-36	Up-regulated
CIAO2A	Pig	4.7671e-41	1.60171	132	43	1.74214e-36	Up-regulated
GAN	Pig	4.83438e-41	1.28372	218	99	1.76672e-36	Up-regulated
ENSSSCG00000003077	Pig	4.85955e-41	1.65261	0.1	25	1.77592e-36	Up-regulated
ENSSSCG00000038144	Pig	6.70089e-41	1.01604	368	221	2.44884e-36	Up-regulated
RUNX2	Pig	7.12616e-41	1.68999	102	26	2.60425e-36	Up-regulated
GADD45B	Pig	7.29705e-41	1.8836	0.1	25	2.66671e-36	Up-regulated
MAN1A2	Pig	7.31098e-41	1.11396	204	89	2.6718e-36	Up-regulated
FAM199X	Pig	8.58483e-41	1.93197	104	27	3.13732e-36	Up-regulated
RPL6	Pig	9.54771e-41	1.52511	129	41	3.48921e-36	Up-regulated
THBS1	Pig	1.07514e-40	1.81643	114	33	3.92908e-36	Up-regulated
OSR1	Pig	1.08936e-40	0.712359	345	189	3.98107e-36	Up-regulated
YARS2	Pig	1.132e-40	1.67821	118	35	4.1369e-36	Up-regulated
FUT11	Pig	1.17903e-40	2.84947	64	9	4.30877e-36	Up-regulated
ENSSSCG00000041465	Pig	1.33556e-40	0.917655	209	0.09	4.8808e-36	Up-regulated
CCDC90B	Pig	1.53471e-40	1.03507	0.19	79	5.6086e-36	Up-regulated
ANKIB1	Pig	1.77167e-40	0.76153	407	246	6.47457e-36	Up-regulated
ENSSSCG00000010448	Pig	1.89288e-40	1.79786	96	23	6.91751e-36	Up-regulated
SHOC2	Pig	1.93871e-40	0.758403	339	187	7.08503e-36	Up-regulated
C9orf64	Pig	1.94497e-40	2.14808	94	23	7.10788e-36	Up-regulated
ORC3	Pig	1.95591e-40	0.888122	278	143	7.14787e-36	Up-regulated
TMTC4	Pig	2.02436e-40	2.0885	97	24	7.39804e-36	Up-regulated
PPP1R14C	Pig	2.3008e-40	0.887899	294	152	8.40826e-36	Up-regulated
PTPRG	Pig	2.62606e-40	0.909615	355	205	9.59694e-36	Up-regulated
SPAG16	Pig	2.83517e-40	1.82881	141	0.05	1.03611e-35	Up-regulated
TAF4B	Pig	2.97083e-40	1.49153	0.13	42	1.08569e-35	Up-regulated
AREL1	Pig	3.0035e-40	1.25327	161	61	1.09763e-35	Up-regulated
DOP1A	Pig	3.28995e-40	0.953126	312	168	1.20231e-35	Up-regulated
DHX57	Pig	3.62275e-40	1.23837	164	63	1.32393e-35	Up-regulated
RC3H1	Pig	3.80274e-40	0.686753	505	337	1.38971e-35	Up-regulated
JKAMP	Pig	3.93213e-40	1.94919	84	18	1.437e-35	Up-regulated
ENSSSCG00000035836	Pig	4.41983e-40	3.79613	48	3	1.61523e-35	Up-regulated
KAZN	Pig	4.68559e-40	3.3901	53	5	1.71235e-35	Up-regulated
DPH5	Pig	5.45877e-40	1.52895	107	29	1.99491e-35	Up-regulated
SESTD1	Pig	6.0243e-40	0.750491	456	0.3	2.20158e-35	Up-regulated
OSGEPL1	Pig	6.12715e-40	0.784481	407	245	2.23917e-35	Up-regulated
MCU	Pig	6.40721e-40	0.965542	313	172	2.34151e-35	Up-regulated
HSPA4	Pig	6.90031e-40	0.780467	326	0.18	2.52172e-35	Up-regulated
ENSSSCG00000051006	Pig	7.0609e-40	6.33422	0.04	1	2.58041e-35	Up-regulated
MIS12	Pig	7.27127e-40	2.46819	72	13	2.65728e-35	Up-regulated
ZNF24	Pig	7.3703e-40	0.965433	224	102	2.69348e-35	Up-regulated
FLVCR1	Pig	8.1631e-40	1.38028	142	0.05	2.9832e-35	Up-regulated
ATP5MG	Pig	8.69082e-40	0.925492	309	169	3.17606e-35	Up-regulated
NDST3	Pig	8.909e-40	0.970756	0.18	72	3.25579e-35	Up-regulated
SBK1	Pig	1.11088e-39	1.9681	95	24	4.05971e-35	Up-regulated
RPS7	Pig	1.13112e-39	1.15606	199	86	4.13366e-35	Up-regulated
TBC1D5	Pig	1.13711e-39	0.59596	625	479	4.15558e-35	Up-regulated
SMAP1	Pig	1.1926e-39	0.68757	478	312	4.35835e-35	Up-regulated
SLC25A21	Pig	1.21955e-39	0.753695	423	262	4.45684e-35	Up-regulated
C7H6orf125	Pig	1.2285e-39	1.65396	117	36	4.48955e-35	Up-regulated
TTC37	Pig	1.25478e-39	0.711926	297	154	4.5856e-35	Up-regulated
RAB11FIP2	Pig	1.33177e-39	1.3106	0.18	74	4.86696e-35	Up-regulated
APC	Pig	1.36818e-39	0.709433	421	259	5.00003e-35	Up-regulated
PARD3	Pig	1.43744e-39	0.527013	817	0.73	5.25313e-35	Up-regulated
SGMS2	Pig	1.58994e-39	6.07313	41	1	5.81045e-35	Up-regulated
UBXN8	Pig	1.59014e-39	1.92338	87	0.02	5.81116e-35	Up-regulated
ENSSSCG00000028035	Pig	1.63559e-39	0.646985	0.49	313	5.97727e-35	Up-regulated
TAOK1	Pig	1.65036e-39	0.697832	488	316	6.03124e-35	Up-regulated
MSL1	Pig	1.89212e-39	1.55632	0.12	37	6.91474e-35	Up-regulated
PPP1R36	Pig	2.05253e-39	2.3117	77	15	7.50097e-35	Up-regulated
ANKHD1	Pig	2.21974e-39	0.587028	655	489	8.11204e-35	Up-regulated
THUMPD3	Pig	2.22747e-39	1.18134	0.18	74	8.14029e-35	Up-regulated
RNF181	Pig	2.3915e-39	2.40374	71	12	8.73975e-35	Up-regulated
RACK1	Pig	3.32515e-39	1.73893	104	28	1.21518e-34	Up-regulated
C4orf46	Pig	3.43324e-39	3.65899	48	3	1.25468e-34	Up-regulated
PLCD4	Pig	3.56604e-39	6.05916	41	1	1.30321e-34	Up-regulated
CHD6	Pig	3.77655e-39	0.878805	329	184	1.38014e-34	Up-regulated
ENSSSCG00000040763	Pig	3.94887e-39	2.65241	69	12	1.44312e-34	Up-regulated
PUM1	Pig	4.59327e-39	0.657641	0.59	432	1.67861e-34	Up-regulated
ASAH1	Pig	5.43276e-39	2.54516	0.07	12	1.9854e-34	Up-regulated
ENSSSCG00000039658	Pig	6.06885e-39	2.14364	101	27	2.21786e-34	Up-regulated
DOT1L	Pig	6.84175e-39	1.07252	212	96	2.50032e-34	Up-regulated
RCOR3	Pig	7.46728e-39	0.706019	423	259	2.72892e-34	Up-regulated
MEGF11	Pig	7.69021e-39	1.56831	98	25	2.81039e-34	Up-regulated
RPAP3	Pig	8.34609e-39	0.86166	273	138	3.05008e-34	Up-regulated
PPP1R42	Pig	8.37704e-39	5.1092	41	1	3.06139e-34	Up-regulated
CELF4	Pig	8.59104e-39	6.27173	41	1	3.13959e-34	Up-regulated
KRT80	Pig	9.07362e-39	2.40765	63	9	3.31595e-34	Up-regulated
EIF4E	Pig	1.03275e-38	0.939578	347	202	3.77418e-34	Up-regulated
DHX9	Pig	1.04787e-38	0.940044	315	177	3.82943e-34	Up-regulated
NFIB	Pig	1.05029e-38	0.555485	791	703	3.83829e-34	Up-regulated
YAP1	Pig	1.17618e-38	0.661814	567	406	4.29834e-34	Up-regulated
ENSSSCG00000028414	Pig	1.27216e-38	0.696185	325	179	4.6491e-34	Up-regulated
YWHAH	Pig	1.28623e-38	1.41594	122	39	4.70051e-34	Up-regulated
UFSP2	Pig	1.30993e-38	0.985461	0.2	88	4.78713e-34	Up-regulated
MTX2	Pig	1.31296e-38	0.686383	345	194	4.79819e-34	Up-regulated
SMPD1	Pig	1.3135e-38	2.7554	61	8	4.80018e-34	Up-regulated
PLCZ1	Pig	1.31616e-38	6.28477	39	1	4.80991e-34	Up-regulated
VPS37C	Pig	1.33215e-38	1.8151	104	29	4.86833e-34	Up-regulated
CCL5	Pig	1.46588e-38	7.06126	38	0	5.35705e-34	Up-regulated
ENSSSCG00000000148	Pig	1.51197e-38	3.92933	43	2	5.5255e-34	Up-regulated
YBX2	Pig	1.6443e-38	4.10576	45	2	6.00911e-34	Up-regulated
ZNF566	Pig	2.03099e-38	1.50527	0.1	27	7.42223e-34	Up-regulated
CWF19L1	Pig	2.15775e-38	1.84136	124	41	7.88551e-34	Up-regulated
NMD3	Pig	2.19802e-38	0.699446	346	195	8.03266e-34	Up-regulated
KIAA2026	Pig	2.33355e-38	0.687365	398	238	8.52797e-34	Up-regulated
ACBD6	Pig	2.7065e-38	0.926561	252	126	9.89091e-34	Up-regulated
RRAGB	Pig	3.17056e-38	1.21259	155	59	1.15868e-33	Up-regulated
DNAJC24	Pig	3.18695e-38	1.50311	119	38	1.16467e-33	Up-regulated
ATF6	Pig	3.24302e-38	0.624653	508	334	1.18516e-33	Up-regulated
LGR4	Pig	3.36237e-38	1.4391	225	0.11	1.22878e-33	Up-regulated
PUS10	Pig	3.44671e-38	0.859508	236	113	1.2596e-33	Up-regulated
SUCLA2	Pig	3.58233e-38	0.581685	338	186	1.30916e-33	Up-regulated
PCSK6	Pig	3.7381e-38	1.10238	275	147	1.36609e-33	Up-regulated
CYLD	Pig	3.82331e-38	0.917814	283	149	1.39723e-33	Up-regulated
FBXO22	Pig	4.50413e-38	0.748987	447	287	1.64603e-33	Up-regulated
DCUN1D5	Pig	4.63136e-38	0.94324	183	77	1.69253e-33	Up-regulated
TSPO	Pig	4.91721e-38	2.5763	61	8	1.79699e-33	Up-regulated
TMEM30A	Pig	5.25256e-38	1.12448	0.2	89	1.91955e-33	Up-regulated
SLC25A20	Pig	5.31507e-38	1.57164	0.12	38	1.94239e-33	Up-regulated
PDHX	Pig	5.75164e-38	0.648872	362	209	2.10194e-33	Up-regulated
ACOXL	Pig	6.01783e-38	4.79595	0.05	4	2.19922e-33	Up-regulated
ENSSSCG00000038260	Pig	6.32595e-38	1.67434	95	24	2.31182e-33	Up-regulated
FGF2	Pig	7.19589e-38	2.37195	68	12	2.62974e-33	Up-regulated
ENSSSCG00000000576	Pig	8.24659e-38	0.6561	421	262	3.01372e-33	Up-regulated
INHBA	Pig	1.10885e-37	8.92797	36	0	4.05231e-33	Up-regulated
ENSSSCG00000031037	Pig	1.11418e-37	1.29796	128	43	4.07177e-33	Up-regulated
ENSSSCG00000010517	Pig	1.17233e-37	1.07634	145	53	4.28427e-33	Up-regulated
PPP4R3A	Pig	1.18534e-37	0.655337	458	299	4.33182e-33	Up-regulated
NSUN3	Pig	1.43376e-37	1.08447	197	88	5.23968e-33	Up-regulated
SLC5A4	Pig	1.46453e-37	1.30486	124	0.04	5.35214e-33	Up-regulated
ASCC2	Pig	1.60985e-37	1.60426	126	42	5.88321e-33	Up-regulated
FUCA1	Pig	1.70485e-37	2.01932	88	21	6.23037e-33	Up-regulated
VWDE	Pig	1.77513e-37	3.94352	44	3	6.4872e-33	Up-regulated
ALAD	Pig	2.31689e-37	2.40716	0.08	18	8.46708e-33	Up-regulated
ADGRA3	Pig	2.31849e-37	0.901652	324	184	8.47293e-33	Up-regulated
GTPBP8	Pig	2.68063e-37	1.7276	138	51	9.79635e-33	Up-regulated
ODF2L	Pig	2.77203e-37	1.54516	103	29	1.01304e-32	Up-regulated
THOC3	Pig	2.77321e-37	1.52233	118	38	1.01347e-32	Up-regulated
15,00 ARL	Pig	3.03172e-37	0.929392	253	0.13	1.10794e-32	Up-regulated
FADS3	Pig	3.07223e-37	1.32412	147	55	1.12275e-32	Up-regulated
MAP3K7	Pig	3.17431e-37	1.01091	191	83	1.16005e-32	Up-regulated
UBR5	Pig	3.44679e-37	0.591122	0.55	388	1.25963e-32	Up-regulated
CFAP94	Pig	3.44837e-37	1.02533	191	84	1.26021e-32	Up-regulated
CD9	Pig	3.6247e-37	2.41875	0.07	13	1.32465e-32	Up-regulated
SAP30	Pig	3.66992e-37	1.68508	93	24	1.34117e-32	Up-regulated
MFSD2B	Pig	3.93879e-37	2.40008	66	11	1.43943e-32	Up-regulated
SMIM2	Pig	4.16064e-37	4.69997	0.04	1	1.52051e-32	Up-regulated
MFN1	Pig	4.2359e-37	0.72916	322	179	1.54801e-32	Up-regulated
FAM169A	Pig	4.70913e-37	3.17162	0.05	5	1.72095e-32	Up-regulated
RMDN2	Pig	5.37268e-37	1.28016	169	0.07	1.96345e-32	Up-regulated
TENT2	Pig	5.69756e-37	0.717948	469	0.31	2.08217e-32	Up-regulated
LGMN	Pig	5.96272e-37	2.93542	58	8	2.17908e-32	Up-regulated
GTF2IRD1	Pig	6.65194e-37	1.25255	186	81	2.43095e-32	Up-regulated
JCHAIN	Pig	6.82721e-37	1.34613	158	62	2.49501e-32	Up-regulated
SYT11	Pig	7.13465e-37	6.88757	36	0	2.60736e-32	Up-regulated
DCAF17	Pig	7.26193e-37	1.41398	133	47	2.65387e-32	Up-regulated
SND1	Pig	7.30834e-37	1.01047	234	115	2.67083e-32	Up-regulated
EYA3	Pig	7.56424e-37	0.685849	369	218	2.76435e-32	Up-regulated
SEPTIN6	Pig	7.83696e-37	1.73764	143	54	2.86402e-32	Up-regulated
CRYAB	Human	7.89504e-37	6.83898	36	0	2.88524e-32	Up-regulated
ENSSSCG00000037595	Pig	8.48139e-37	1.8821	87	21	3.09952e-32	Up-regulated
ENSSSCG00000001038	Pig	9.281e-37	1.61227	108	33	3.39174e-32	Up-regulated
UHMK1	Pig	9.69748e-37	1.6713	107	32	3.54394e-32	Up-regulated
ENSSSCG00000008942	Pig	9.97587e-37	0.860122	295	0.16	3.64568e-32	Up-regulated
CLOCK	Pig	1.05638e-36	0.574812	576	413	3.86056e-32	Up-regulated
ERO1B	Pig	1.07706e-36	1.42559	125	42	3.93613e-32	Up-regulated
MAP2K1	Pig	1.19306e-36	0.929466	201	91	4.36004e-32	Up-regulated
TARDBP	Pig	1.22275e-36	1.08916	218	103	4.46853e-32	Up-regulated
TTC12	Pig	1.29924e-36	2.96478	49	5	4.74806e-32	Up-regulated
RPS3A	Pig	1.36785e-36	1.76355	106	32	4.99882e-32	Up-regulated
ENSSSCG00000032311	Pig	1.38601e-36	1.88297	84	0.02	5.06516e-32	Up-regulated
FMC1	Pig	1.40395e-36	2.26278	75	15	5.13075e-32	Up-regulated
GM2A	Pig	1.49768e-36	3.22231	49	4	5.47329e-32	Up-regulated
PPP2R3C	Pig	1.50312e-36	1.42475	132	47	5.49314e-32	Up-regulated
PPARG	Pig	1.54622e-36	5.09618	38	1	5.65068e-32	Up-regulated
MRPL50	Pig	1.57994e-36	3.71349	46	4	5.7739e-32	Up-regulated
DYM	Pig	1.70737e-36	0.52543	702	545	6.23958e-32	Up-regulated
ENSSSCG00000051689	Pig	1.71029e-36	6.60558	37	1	6.25026e-32	Up-regulated
RBBP8	Pig	1.78863e-36	1.22931	159	64	6.53653e-32	Up-regulated
KLHL3	Pig	1.81126e-36	0.63539	455	298	6.61926e-32	Up-regulated
GPR160	Pig	1.83736e-36	2.97323	56	7	6.71463e-32	Up-regulated
MTERF3	Pig	1.85519e-36	0.881639	277	147	6.77979e-32	Up-regulated
SYT14	Pig	1.99377e-36	0.82079	194	85	7.28625e-32	Up-regulated
HDAC7	Pig	2.02815e-36	1.06587	236	116	7.41189e-32	Up-regulated
ETS1	Pig	2.11354e-36	6.1967	35	0	7.72395e-32	Up-regulated
MTA3	Pig	2.60855e-36	1.21061	207	97	9.53295e-32	Up-regulated
SSR4	Pig	2.63726e-36	2.91041	53	6	9.63788e-32	Up-regulated
ENSSSCG00000047863	Pig	2.96915e-36	3.23958	48	4	1.08508e-31	Up-regulated
SLC16A3	Pig	2.99596e-36	2.66383	0.05	5	1.09487e-31	Up-regulated
PHF11	Pig	3.07174e-36	0.845509	292	0.16	1.12257e-31	Up-regulated
COX5A	Pig	3.30548e-36	0.55541	421	259	1.20799e-31	Up-regulated
ODR4	Pig	3.37502e-36	0.880128	0.27	142	1.2334e-31	Up-regulated
OGN	Pig	3.76896e-36	5.87928	37	1	1.37736e-31	Up-regulated
ENSSSCG00000027491	Pig	3.95789e-36	0.905382	224	107	1.44641e-31	Up-regulated
GLRA1	Pig	4.02012e-36	1.32187	106	32	1.46915e-31	Up-regulated
SH3PXD2B	Pig	4.0363e-36	1.20452	236	118	1.47507e-31	Up-regulated
IRF7	Pig	4.49753e-36	5.99555	36	1	1.64362e-31	Up-regulated
CHCHD6	Pig	4.67368e-36	1.1585	158	63	1.708e-31	Up-regulated
NT5DC1	Pig	5.57686e-36	3.81101	47	4	2.03806e-31	Up-regulated
FOS	Pig	6.22666e-36	4.30854	41	2	2.27553e-31	Up-regulated
METTL5	Pig	6.35967e-36	1.09474	156	62	2.32414e-31	Up-regulated
FAM168A	Pig	6.63135e-36	0.676821	339	193	2.42343e-31	Up-regulated
ENSSSCG00000036115	Pig	6.90211e-36	1.1653	166	69	2.52238e-31	Up-regulated
PAPOLG	Pig	7.88128e-36	0.74931	236	115	2.88021e-31	Up-regulated
CCDC12	Pig	8.33124e-36	1.17661	214	102	3.04465e-31	Up-regulated
TMEM182	Pig	8.44295e-36	0.511001	732	608	3.08548e-31	Up-regulated
PPP4R2	Pig	8.65979e-36	0.661636	305	167	3.16472e-31	Up-regulated
ADAL	Pig	8.68119e-36	1.20356	126	43	3.17254e-31	Up-regulated
FAM214B	Pig	8.81863e-36	1.85129	0.08	18	3.22277e-31	Up-regulated
PRMT9	Pig	9.24815e-36	1.06488	153	59	3.37974e-31	Up-regulated
ZNRF2	Pig	9.94518e-36	1.24727	168	71	3.63447e-31	Up-regulated
PANX1	Pig	1.08183e-35	5.78434	37	1	3.95356e-31	Up-regulated
NOVA1	Pig	1.09356e-35	1.38098	163	69	3.99643e-31	Up-regulated
PDE5A	Pig	1.11926e-35	2.00735	0.09	24	4.09035e-31	Up-regulated
ZFP30	Pig	1.12986e-35	2.25832	79	18	4.12909e-31	Up-regulated
FBXL13	Pig	1.23126e-35	1.61517	91	24	4.49964e-31	Up-regulated
ENSSSCG00000044574	Pig	1.27488e-35	3.17573	51	5	4.65905e-31	Up-regulated
DAB2	Pig	1.32511e-35	4.93887	36	1	4.84261e-31	Up-regulated
MOSPD1	Pig	1.35474e-35	1.51046	142	54	4.95089e-31	Up-regulated
ENSSSCG00000044244	Pig	1.39634e-35	1.8841	68	13	5.10294e-31	Up-regulated
C3orf62	Pig	1.46674e-35	6.66241	34	0	5.3602e-31	Up-regulated
ATG12	Pig	1.50548e-35	1.40448	142	54	5.50179e-31	Up-regulated
ENSSSCG00000006156	Pig	1.53175e-35	2.12601	0.08	18	5.59778e-31	Up-regulated
WDR75	Pig	1.60689e-35	0.962193	191	85	5.87236e-31	Up-regulated
ZNF143	Pig	1.61864e-35	1.20454	182	81	5.91532e-31	Up-regulated
NHLRC2	Pig	1.6601e-35	0.539325	615	461	6.06682e-31	Up-regulated
BRI3	Pig	1.81313e-35	1.9706	77	17	6.62607e-31	Up-regulated
CACUL1	Pig	1.86596e-35	0.830674	0.24	0.12	6.81916e-31	Up-regulated
NFXL1	Pig	2.33402e-35	1.55192	99	28	8.52969e-31	Up-regulated
CD80	Pig	2.37767e-35	1.86094	73	15	8.68919e-31	Up-regulated
NXN	Pig	2.38071e-35	1.66091	79	18	8.70031e-31	Up-regulated
PPIL3	Pig	2.77476e-35	2.14923	78	18	1.01404e-30	Up-regulated
TRIM35	Pig	2.90523e-35	1.67972	87	22	1.06172e-30	Up-regulated
MED14	Pig	3.05251e-35	0.949168	0.2	91	1.11554e-30	Up-regulated
ENSSSCG00000012046	Pig	3.10037e-35	1.0355	168	0.07	1.13303e-30	Up-regulated
NPNT	Pig	3.27684e-35	0.877859	185	81	1.19752e-30	Up-regulated
TBC1D2B	Pig	3.33962e-35	2.75384	65	12	1.22046e-30	Up-regulated
PCDH9	Pig	3.48455e-35	4.0585	51	6	1.27343e-30	Up-regulated
PHEX	Pig	3.65389e-35	0.742536	279	149	1.33531e-30	Up-regulated
ENSSSCG00000002935	Pig	3.85778e-35	2.05249	97	28	1.40983e-30	Up-regulated
NDUFB3	Pig	4.21146e-35	0.708508	265	138	1.53908e-30	Up-regulated
COPS2	Pig	4.23576e-35	0.77066	0.27	141	1.54796e-30	Up-regulated
TCTN2	Pig	4.27273e-35	1.30239	151	0.06	1.56147e-30	Up-regulated
SAMD8	Pig	4.58083e-35	0.950994	267	142	1.67406e-30	Up-regulated
EEF1A2	Pig	4.82982e-35	0.72005	399	245	1.76506e-30	Up-regulated
ATP11C	Pig	5.38226e-35	0.529457	402	246	1.96695e-30	Up-regulated
ENSSSCG00000039249	Pig	5.60338e-35	1.94215	107	34	2.04776e-30	Up-regulated
SLC25A42	Pig	5.78519e-35	2.17742	94	26	2.1142e-30	Up-regulated
ZCWPW2	Pig	5.89321e-35	1.02075	214	102	2.15367e-30	Up-regulated
IFNGR2	Pig	5.91419e-35	2.47151	78	18	2.16134e-30	Up-regulated
RASSF4	Pig	6.26595e-35	2.82726	56	8	2.28989e-30	Up-regulated
RASD2	Pig	6.36515e-35	3.68475	47	4	2.32615e-30	Up-regulated
RPS13	Pig	6.37501e-35	4.19403	0.04	2	2.32975e-30	Up-regulated
FH	Pig	7.43706e-35	1.18507	154	62	2.71787e-30	Up-regulated
GJC1	Pig	7.45848e-35	3.65928	44	4	2.7257e-30	Up-regulated
NSD3	Pig	7.98259e-35	0.636942	451	293	2.91724e-30	Up-regulated
MTMR2	Pig	8.22307e-35	0.744634	0.27	143	3.00512e-30	Up-regulated
ATRNL1	Pig	9.02392e-35	4.02541	39	2	3.29779e-30	Up-regulated
ALB	Pig	9.28984e-35	0.994188	206	98	3.39497e-30	Up-regulated
CGRRF1	Pig	9.3893e-35	1.70674	98	29	3.43132e-30	Up-regulated
SLC37A2	Pig	1.02975e-34	6.6166	34	0	3.76323e-30	Up-regulated
ENSSSCG00000040973	Pig	1.06417e-34	2.61788	63	11	3.88903e-30	Up-regulated
VPS26C	Pig	1.13886e-34	1.26277	187	84	4.16195e-30	Up-regulated
DOCK5	Pig	1.1591e-34	1.20276	194	89	4.23592e-30	Up-regulated
MOSPD2	Pig	1.16295e-34	1.44416	107	33	4.25e-30	Up-regulated
TATDN1	Pig	1.21117e-34	1.10935	184	82	4.42621e-30	Up-regulated
LAMA4	Pig	1.26185e-34	0.599136	637	499	4.61143e-30	Up-regulated
ENSSSCG00000009633	Pig	1.33786e-34	4.65827	37	1	4.88922e-30	Up-regulated
HYPK	Pig	1.79608e-34	1.34109	107	33	6.56377e-30	Up-regulated
ENSSSCG00000049961	Pig	1.80417e-34	1.49924	123	43	6.59334e-30	Up-regulated
VPS72	Pig	1.91089e-34	1.07246	156	64	6.98336e-30	Up-regulated
NDUFA8	Pig	2.06519e-34	0.746225	226	111	7.54725e-30	Up-regulated
MOB3B	Pig	2.14177e-34	4.30407	42	3	7.82709e-30	Up-regulated
ENSSSCG00000014884	Pig	2.47255e-34	1.1486	226	112	9.03595e-30	Up-regulated
BPNT1	Pig	2.51504e-34	1.10014	127	45	9.19121e-30	Up-regulated
DHX58	Pig	2.5921e-34	7.44056	33	0	9.47281e-30	Up-regulated
BIN1	Pig	2.68315e-34	8.41204	32	0	9.80557e-30	Up-regulated
GGCX	Pig	2.78258e-34	0.861558	188	84	1.0169e-29	Up-regulated
CD109	Pig	2.9334e-34	2.24653	0.07	14	1.07201e-29	Up-regulated
OTUD4	Pig	3.07184e-34	0.731015	0.26	136	1.12261e-29	Up-regulated
DNAAF4	Pig	3.07867e-34	3.54989	46	4	1.1251e-29	Up-regulated
LRRC41	Pig	3.19506e-34	0.853499	0.26	135	1.16763e-29	Up-regulated
SNX10	Pig	3.24325e-34	4.30932	41	3	1.18525e-29	Up-regulated
HOOK3	Pig	3.26608e-34	0.597788	486	325	1.19359e-29	Up-regulated
BTBD10	Pig	3.38471e-34	0.913397	181	0.08	1.23694e-29	Up-regulated
HPS3	Pig	3.74981e-34	3.96573	42	3	1.37037e-29	Up-regulated
DCP1B	Pig	3.75173e-34	0.793492	265	142	1.37107e-29	Up-regulated
NCOA2	Pig	3.7652e-34	0.609873	0.66	524	1.37599e-29	Up-regulated
ENDOV	Pig	3.80158e-34	1.16423	133	49	1.38929e-29	Up-regulated
MIER1	Pig	3.88298e-34	0.675186	415	265	1.41904e-29	Up-regulated
RCBTB1	Pig	3.91783e-34	0.881273	0.25	0.13	1.43177e-29	Up-regulated
YWHAB	Pig	4.1282e-34	1.32271	148	59	1.50865e-29	Up-regulated
MED8	Pig	4.37766e-34	1.05872	0.16	66	1.59982e-29	Up-regulated
TRMT1L	Pig	4.56285e-34	0.627479	354	0.21	1.66749e-29	Up-regulated
CCDC82	Pig	5.03186e-34	2.4633	0.06	0.01	1.83889e-29	Up-regulated
ENSSSCG00000021977	Pig	5.38847e-34	0.623412	543	381	1.96922e-29	Up-regulated
STAT3	Pig	5.53155e-34	0.740994	345	204	2.0215e-29	Up-regulated
RNF152	Pig	5.77744e-34	1.16898	132	49	2.11136e-29	Up-regulated
RPS6	Pig	6.38035e-34	1.91238	85	22	2.3317e-29	Up-regulated
TCAF1	Pig	6.61573e-34	0.630995	471	306	2.41772e-29	Up-regulated
ENSSSCG00000010954	Pig	6.74e-34	0.757193	278	152	2.46313e-29	Up-regulated
ENSSSCG00000014132	Pig	7.16134e-34	1.12967	118	0.04	2.61711e-29	Up-regulated
ENSSSCG00000035142	Pig	7.77464e-34	1.5057	105	33	2.84124e-29	Up-regulated
MPP4	Pig	8.15153e-34	2.69471	58	9	2.97898e-29	Up-regulated
UGGT1	Pig	8.52941e-34	0.708768	321	185	3.11707e-29	Up-regulated
EXOC6	Pig	8.62632e-34	0.81199	266	141	3.15249e-29	Up-regulated
TRAK2	Pig	9.53883e-34	0.789545	282	156	3.48596e-29	Up-regulated
ELP4	Pig	9.88173e-34	0.576859	0.29	156	3.61128e-29	Up-regulated
STAMBP	Pig	1.19452e-33	1.14045	164	0.07	4.36536e-29	Up-regulated
OXCT1	Pig	1.26443e-33	0.604133	526	365	4.62085e-29	Up-regulated
FAM204A	Pig	1.26523e-33	0.978241	159	66	4.62377e-29	Up-regulated
PAN3	Pig	1.45453e-33	0.698944	432	284	5.31557e-29	Up-regulated
RBBP6	Pig	1.49119e-33	0.753225	345	204	5.44956e-29	Up-regulated
ENSSSCG00000026719	Pig	1.53564e-33	2.03088	73	16	5.61201e-29	Up-regulated
MLH3	Pig	1.57741e-33	1.20603	155	64	5.76463e-29	Up-regulated
SMIM15	Pig	1.62551e-33	2.05128	75	17	5.94042e-29	Up-regulated
PLEKHA3	Pig	1.75158e-33	1.69449	102	32	6.40116e-29	Up-regulated
ENSSSCG00000050625	Pig	1.89135e-33	2.59193	56	9	6.91196e-29	Up-regulated
COLEC12	Pig	1.92771e-33	5.92204	32	0	7.04483e-29	Up-regulated
RELL1	Pig	1.97857e-33	2.97194	49	6	7.23069e-29	Up-regulated
ENSSSCG00000007617	Pig	2.29225e-33	1.53911	0.13	48	8.37703e-29	Up-regulated
ENSSSCG00000031140	Pig	2.33567e-33	2.98355	48	5	8.53571e-29	Up-regulated
C20orf194	Pig	2.72392e-33	0.8744	294	167	9.95455e-29	Up-regulated
PI4K2B	Pig	3.13403e-33	1.0374	216	108	1.14533e-28	Up-regulated
MTAP	Pig	3.41687e-33	4.63952	37	2	1.2487e-28	Up-regulated
PCYOX1	Pig	4.35778e-33	1.01552	172	75	1.59255e-28	Up-regulated
ENOX2	Pig	5.07549e-33	1.06248	149	0.06	1.85484e-28	Up-regulated
CRPPA	Pig	5.33428e-33	0.665499	326	188	1.94941e-28	Up-regulated
ENSSSCG00000026064	Pig	5.59685e-33	1.90082	77	18	2.04537e-28	Up-regulated
20,00 CYP	Pig	5.69248e-33	1.93192	78	19	2.08032e-28	Up-regulated
ENSSSCG00000034844	Pig	5.83734e-33	1.22848	154	64	2.13326e-28	Up-regulated
C1orf198	Pig	6.42009e-33	0.710766	254	133	2.34622e-28	Up-regulated
EIF1	Pig	6.69805e-33	0.815537	238	121	2.4478e-28	Up-regulated
EPHX4	Pig	7.17499e-33	4.35898	38	2	2.6221e-28	Up-regulated
ETNK1	Pig	7.82095e-33	0.844589	253	135	2.85817e-28	Up-regulated
CACYBP	Pig	7.90164e-33	1.10382	152	63	2.88765e-28	Up-regulated
CD47	Pig	7.96269e-33	0.524664	426	271	2.90996e-28	Up-regulated
KIAA1217	Pig	7.99364e-33	0.599629	478	324	2.92128e-28	Up-regulated
TMEM160	Pig	8.20108e-33	4.98229	35	1	2.99708e-28	Up-regulated
MACROH2A1	Pig	8.64404e-33	0.833993	292	163	3.15897e-28	Up-regulated
STK26	Pig	8.86894e-33	2.17854	75	18	3.24115e-28	Up-regulated
DCX	Pig	8.90017e-33	1.50902	115	0.04	3.25257e-28	Up-regulated
ENSSSCG00000007646	Pig	8.94056e-33	2.03488	78	19	3.26733e-28	Up-regulated
GBP2	Pig	9.9091e-33	1.08938	153	63	3.62128e-28	Up-regulated
ENSSSCG00000008965	Pig	1.05937e-32	4.0754	37	2	3.87145e-28	Up-regulated
SRFBP1	Pig	1.12532e-32	0.961959	181	82	4.11248e-28	Up-regulated
BICDL2	Pig	1.31967e-32	6.68425	32	0	4.82272e-28	Up-regulated
NFE2L2	Pig	1.35239e-32	0.67579	446	293	4.94231e-28	Up-regulated
ANXA5	Pig	1.36465e-32	1.6834	98	0.03	4.98711e-28	Up-regulated
ATG5	Pig	1.38685e-32	0.906556	256	139	5.06825e-28	Up-regulated
HHAT	Pig	1.59249e-32	1.53048	0.1	31	5.81977e-28	Up-regulated
PCNP	Pig	1.81821e-32	0.786246	302	174	6.64463e-28	Up-regulated
H2AJ	Pig	1.87982e-32	1.65531	81	21	6.86979e-28	Up-regulated
AFG1L	Pig	2.13189e-32	0.523721	416	261	7.79099e-28	Up-regulated
CKMT2	Pig	2.14641e-32	0.569077	496	331	7.84405e-28	Up-regulated
ENSSSCG00000017640	Pig	2.20486e-32	1.39571	0.13	49	8.05765e-28	Up-regulated
COL5A3	Pig	2.21714e-32	4.40401	34	1	8.10255e-28	Up-regulated
MACIR	Pig	2.25445e-32	2.89031	51	7	8.23888e-28	Up-regulated
ENSSSCG00000004983	Pig	2.44155e-32	0.72421	193	0.09	8.92263e-28	Up-regulated
BICD2	Pig	2.54059e-32	1.33507	127	47	9.2846e-28	Up-regulated
XPA	Pig	2.57114e-32	0.827347	191	89	9.39624e-28	Up-regulated
9,00 ARL	Pig	2.95485e-32	5.84426	33	1	1.07985e-27	Up-regulated
CABCOCO1	Pig	3.03118e-32	3.56625	0.04	3	1.10775e-27	Up-regulated
PTPN9	Pig	3.15236e-32	1.03774	266	0.15	1.15203e-27	Up-regulated
PUM3	Pig	3.27895e-32	0.643386	285	156	1.19829e-27	Up-regulated
ENSSSCG00000025593	Pig	3.47289e-32	8.33538	0.03	0	1.26917e-27	Up-regulated
MAP1A	Pig	3.47289e-32	8.61239	0.03	0	1.26917e-27	Up-regulated
SLC39A6	Pig	4.05624e-32	1.10542	147	0.06	1.48235e-27	Up-regulated
LMCD1	Pig	4.18039e-32	3.49082	51	7	1.52772e-27	Up-regulated
TTC39C	Pig	4.20017e-32	4.09382	35	1	1.53495e-27	Up-regulated
TAMM41	Pig	4.25277e-32	1.75132	81	21	1.55418e-27	Up-regulated
ATP5F1C	Pig	4.34322e-32	0.609218	269	145	1.58723e-27	Up-regulated
ENSSSCG00000031636	Pig	4.39857e-32	0.838097	278	157	1.60746e-27	Up-regulated
PRPF4B	Pig	4.58984e-32	0.595837	0.38	236	1.67736e-27	Up-regulated
ATP6V1A	Pig	4.67295e-32	1.29193	145	0.06	1.70773e-27	Up-regulated
ZFAND1	Pig	4.68805e-32	1.13408	156	67	1.71325e-27	Up-regulated
ENSSSCG00000048962	Pig	4.73343e-32	2.10205	63	13	1.72983e-27	Up-regulated
LRRC74B	Pig	5.51435e-32	2.00672	61	11	2.01522e-27	Up-regulated
JADE3	Pig	5.70657e-32	1.15872	193	92	2.08547e-27	Up-regulated
FHIT	Pig	5.79373e-32	0.501922	518	361	2.11732e-27	Up-regulated
FAM3C	Pig	6.26399e-32	1.58791	106	36	2.28917e-27	Up-regulated
SEC23B	Pig	7.48851e-32	2.01779	82	22	2.73668e-27	Up-regulated
RALGPS2	Pig	7.49357e-32	2.05572	86	24	2.73853e-27	Up-regulated
ENSSSCG00000031288	Pig	7.68872e-32	1.98749	72	17	2.80984e-27	Up-regulated
ELOC	Pig	7.69453e-32	1.28212	97	0.03	2.81197e-27	Up-regulated
CCDC127	Pig	7.72476e-32	1.00614	118	42	2.82301e-27	Up-regulated
ENSSSCG00000023546	Pig	7.94731e-32	3.06623	42	4	2.90434e-27	Up-regulated
NSFL1C	Pig	8.63031e-32	0.837742	218	109	3.15395e-27	Up-regulated
GIMD1	Pig	8.73982e-32	4.27169	35	2	3.19397e-27	Up-regulated
MYOM3	Pig	9.37652e-32	0.692191	294	165	3.42665e-27	Up-regulated
PREX1	Pig	9.37726e-32	5.79862	31	0	3.42692e-27	Up-regulated
GPBP1	Pig	9.57725e-32	0.625342	422	274	3.50001e-27	Up-regulated
MRO	Pig	1.02085e-31	0.91701	0.14	55	3.73069e-27	Up-regulated
THAP5	Pig	1.05026e-31	0.969593	171	77	3.83816e-27	Up-regulated
NRDC	Pig	1.07584e-31	0.627548	337	201	3.93167e-27	Up-regulated
CHD3	Pig	1.12053e-31	3.00244	44	4	4.09498e-27	Up-regulated
ENSSSCG00000051489	Pig	1.26531e-31	2.85545	46	5	4.62409e-27	Up-regulated
POMT2	Pig	1.47071e-31	1.78643	92	28	5.37472e-27	Up-regulated
PPA2	Pig	1.51243e-31	0.759992	308	179	5.52719e-27	Up-regulated
SHISA4	Pig	1.68414e-31	3.6302	43	4	6.1547e-27	Up-regulated
EML5	Pig	1.74391e-31	0.660508	238	123	6.37312e-27	Up-regulated
TMEM67	Pig	1.85223e-31	1.85886	69	16	6.76898e-27	Up-regulated
SPCS1	Pig	2.02825e-31	1.6457	73	17	7.41224e-27	Up-regulated
PHF20L1	Pig	2.20622e-31	0.644602	381	238	8.06262e-27	Up-regulated
PON1	Pig	2.29948e-31	1.23652	115	41	8.40346e-27	Up-regulated
FER1L6	Pig	2.30563e-31	1.66045	88	25	8.42594e-27	Up-regulated
SOD2	Pig	2.32865e-31	0.726225	0.28	156	8.51004e-27	Up-regulated
PACSIN2	Pig	2.35127e-31	0.503981	0.54	382	8.59271e-27	Up-regulated
SPON1	Pig	2.45323e-31	0.792205	294	172	8.96533e-27	Up-regulated
VIRMA	Pig	2.50358e-31	0.673843	326	192	9.14932e-27	Up-regulated
CHKA	Pig	2.52928e-31	1.17115	196	95	9.24327e-27	Up-regulated
THNSL1	Pig	2.73994e-31	1.8568	63	13	1.00131e-26	Up-regulated
ANKFY1	Pig	3.1002e-31	0.644985	533	378	1.13297e-26	Up-regulated
MTMR7	Pig	3.14285e-31	0.574555	282	156	1.14856e-26	Up-regulated
PRDX6	Pig	3.26138e-31	2.73394	0.06	12	1.19187e-26	Up-regulated
PSMB4	Pig	3.57919e-31	1.18388	104	34	1.30801e-26	Up-regulated
GNB5	Pig	3.72247e-31	1.59158	115	41	1.36037e-26	Up-regulated
ATP5PF	Pig	4.11118e-31	0.728238	218	0.11	1.50243e-26	Up-regulated
RNF138	Pig	4.17855e-31	0.939537	199	97	1.52705e-26	Up-regulated
LINGO1	Pig	4.23633e-31	3.38286	44	5	1.54817e-26	Up-regulated
CNNM2	Pig	4.28711e-31	1.645	0.1	33	1.56672e-26	Up-regulated
THUMPD2	Pig	5.10711e-31	0.857698	224	115	1.86639e-26	Up-regulated
MYEF2	Pig	5.78257e-31	2.96511	49	7	2.11324e-26	Up-regulated
IPO5	Pig	6.05805e-31	1.22188	129	0.05	2.21391e-26	Up-regulated
SRSF4	Pig	6.12019e-31	0.545021	535	382	2.23662e-26	Up-regulated
ENSSSCG00000032503	Pig	6.1472e-31	5.74474	31	0	2.24649e-26	Up-regulated
NEDD1	Pig	6.45869e-31	1.35481	133	53	2.36033e-26	Up-regulated
ENSSSCG00000017103	Pig	6.5001e-31	3.15278	44	5	2.37546e-26	Up-regulated
MCTP1	Pig	6.538e-31	6.05735	0.03	0	2.38931e-26	Up-regulated
SMG1	Pig	6.8345e-31	0.620195	483	329	2.49767e-26	Up-regulated
TTF2	Pig	7.91434e-31	2.41997	56	0.01	2.8923e-26	Up-regulated
METTL24	Pig	8.46637e-31	0.912088	151	64	3.09404e-26	Up-regulated
CCDC167	Pig	8.74154e-31	3.37902	0.04	4	3.1946e-26	Up-regulated
RPS16	Pig	8.74549e-31	1.42072	103	34	3.19604e-26	Up-regulated
FAM43B	Pig	8.77939e-31	4.00128	36	2	3.20843e-26	Up-regulated
STX17	Pig	8.83985e-31	0.610102	368	227	3.23052e-26	Up-regulated
NTAN1	Pig	9.49448e-31	2.75987	41	4	3.46976e-26	Up-regulated
RECQL	Pig	1.08978e-30	2.4216	0.06	12	3.9826e-26	Up-regulated
ABCE1	Pig	1.13295e-30	0.672647	331	196	4.14038e-26	Up-regulated
RASA2	Pig	1.15689e-30	0.862437	253	0.14	4.22786e-26	Up-regulated
CRYBG1	Pig	1.24645e-30	1.45236	0.1	33	4.55516e-26	Up-regulated
TNPO1	Pig	1.43394e-30	0.634445	454	309	5.24034e-26	Up-regulated
ENSSSCG00000016085	Pig	1.44647e-30	2.57155	62	13	5.28611e-26	Up-regulated
RUFY2	Pig	1.48014e-30	0.781611	298	174	5.40919e-26	Up-regulated
SLC12A2	Pig	1.48533e-30	1.00158	197	97	5.42813e-26	Up-regulated
ENSSSCG00000013052	Pig	1.49878e-30	0.705618	373	233	5.4773e-26	Up-regulated
FLRT2	Pig	1.51975e-30	7.03435	0.03	0	5.55393e-26	Up-regulated
UTP23	Pig	1.53685e-30	1.52728	94	29	5.61641e-26	Up-regulated
POLI	Pig	1.59918e-30	1.18479	119	44	5.84421e-26	Up-regulated
PDE10A	Pig	1.69383e-30	8.56051	29	0	6.19011e-26	Up-regulated
TEAD4	Pig	1.79796e-30	1.0783	148	63	6.57063e-26	Up-regulated
TRMT6	Pig	1.87535e-30	0.903021	224	117	6.85347e-26	Up-regulated
ACTR1B	Pig	1.93437e-30	1.35761	114	41	7.06917e-26	Up-regulated
TAOK3	Pig	2.19336e-30	1.48577	136	56	8.01565e-26	Up-regulated
HSPBAP1	Pig	2.23425e-30	1.51177	116	43	8.16506e-26	Up-regulated
ENSSSCG00000034976	Pig	2.29938e-30	1.45947	88	26	8.40309e-26	Up-regulated
ENSSSCG00000048390	Pig	2.32895e-30	2.24869	53	9	8.51115e-26	Up-regulated
ENSSSCG00000008981	Pig	2.46335e-30	2.80318	46	6	9.00231e-26	Up-regulated
PDCL3	Pig	2.48341e-30	1.55639	98	32	9.07563e-26	Up-regulated
RELCH	Pig	2.51025e-30	0.676072	0.35	214	9.17369e-26	Up-regulated
SULF2	Pig	2.51236e-30	4.07613	0.04	4	9.18142e-26	Up-regulated
SLC13A5	Pig	2.53307e-30	5.13329	32	1	9.25711e-26	Up-regulated
CEP97	Pig	2.60127e-30	1.53723	97	31	9.50635e-26	Up-regulated
VPS13D	Pig	2.71286e-30	0.724055	494	0.35	9.91414e-26	Up-regulated
NFYA	Pig	2.94313e-30	1.63746	78	21	1.07557e-25	Up-regulated
MTCL1	Pig	3.00519e-30	2.69718	69	17	1.09825e-25	Up-regulated
TMEM165	Pig	3.02166e-30	1.04028	136	55	1.10427e-25	Up-regulated
NMRK1	Pig	3.02362e-30	1.85429	62	13	1.10498e-25	Up-regulated
MARCHF5	Pig	3.24156e-30	0.707323	0.27	148	1.18463e-25	Up-regulated
ACOT12	Pig	3.28093e-30	3.50448	39	3	1.19901e-25	Up-regulated
ANXA4	Pig	3.31404e-30	0.63988	291	165	1.21111e-25	Up-regulated
ENSSSCG00000015293	Pig	3.33943e-30	1.81823	68	16	1.2204e-25	Up-regulated
FGF9	Pig	3.42901e-30	2.79204	44	5	1.25313e-25	Up-regulated
WASL	Pig	3.67395e-30	0.637881	367	229	1.34265e-25	Up-regulated
POT1	Pig	3.90356e-30	1.49867	108	38	1.42656e-25	Up-regulated
SPRY2	Pig	3.98225e-30	6.54712	0.03	0	1.45531e-25	Up-regulated
ENSSSCG00000032436	Pig	4.47427e-30	8.14341	28	0	1.63512e-25	Up-regulated
LAMTOR2	Pig	4.53245e-30	6.19775	29	0	1.65638e-25	Up-regulated
ZBTB41	Pig	4.7916e-30	1.05581	156	69	1.75109e-25	Up-regulated
TMED5	Pig	4.86497e-30	1.31166	109	39	1.7779e-25	Up-regulated
TET3	Pig	5.08629e-30	1.59876	111	0.04	1.85879e-25	Up-regulated
ENSSSCG00000038506	Pig	5.29557e-30	1.0602	171	79	1.93527e-25	Up-regulated
AKR1B1	Pig	5.37945e-30	0.826821	238	127	1.96592e-25	Up-regulated
ATP6V1E2	Pig	6.5868e-30	3.40228	44	5	2.40715e-25	Up-regulated
ATP5PB	Pig	6.64584e-30	0.649089	243	129	2.42872e-25	Up-regulated
ATP2C1	Pig	6.65918e-30	0.539093	496	337	2.4336e-25	Up-regulated
SOD1	Pig	6.76268e-30	1.66493	83	24	2.47142e-25	Up-regulated
BCL2L13	Pig	6.94266e-30	0.577402	0.47	316	2.5372e-25	Up-regulated
ENSSSCG00000043759	Pig	7.3167e-30	2.95761	42	5	2.67389e-25	Up-regulated
ENSSSCG00000013715	Pig	7.35023e-30	1.01413	169	78	2.68614e-25	Up-regulated
SAMHD1	Pig	7.51925e-30	1.12176	139	58	2.74791e-25	Up-regulated
AGTPBP1	Pig	8.28533e-30	0.813638	168	76	3.02787e-25	Up-regulated
ENSSSCG00000032623	Pig	8.39721e-30	3.96463	34	2	3.06876e-25	Up-regulated
LIMD1	Pig	9.77717e-30	0.696817	449	0.3	3.57307e-25	Up-regulated
ENSSSCG00000017106	Pig	9.84075e-30	2.30813	61	13	3.5963e-25	Up-regulated
ZFAND5	Pig	1.02527e-29	0.559803	484	335	3.74685e-25	Up-regulated
CPT2	Pig	1.0815e-29	2.3976	58	11	3.95233e-25	Up-regulated
GPR183	Pig	1.08264e-29	4.4571	33	2	3.95651e-25	Up-regulated
IQSEC2	Pig	1.11517e-29	3.34392	41	4	4.07537e-25	Up-regulated
NKAPL	Pig	1.131e-29	2.49333	54	0.01	4.13323e-25	Up-regulated
ERCC4	Pig	1.15162e-29	1.78106	72	18	4.20858e-25	Up-regulated
DERA	Pig	1.26857e-29	1.16402	125	49	4.63599e-25	Up-regulated
ZMYND11	Pig	1.28864e-29	0.552122	507	357	4.70932e-25	Up-regulated
JUND	Human	1.32808e-29	5.20797	32	1	4.85347e-25	Up-regulated
[truncated: 3,344 more rows]

## Sheet: Vasc_EC
gene	Species	p_val	avg_log2FC	pct. 1	pct.2	p_val_adj	level
RGMB	Pig	1.17166e-58	5.89112	843	46	4.28182e-54	Up-regulated
ISG15	Pig	2.70011e-47	3.82878	811	91	9.86754e-43	Up-regulated
RSAD2	Pig	6.20478e-47	3.2633	831	117	2.26754e-42	Up-regulated
CALCRL	Pig	2.9575e-45	2.97319	894	274	1.08082e-40	Up-regulated
SORBS2	Pig	1.20431e-44	3.68843	807	142	4.40114e-40	Up-regulated
RAI14	Pig	8.252e-43	2.6093	0.85	152	3.01569e-38	Up-regulated
CXCL10	Pig	3.42389e-39	8.59587	614	5	1.25126e-34	Up-regulated
LIFR	Pig	3.45124e-38	2.00535	945	472	1.26126e-33	Up-regulated
ENSSSCG00000034570	Pig	6.04952e-38	1.98472	921	289	2.2108e-33	Up-regulated
TANC1	Pig	3.10753e-36	2.16824	0.89	299	1.13565e-31	Up-regulated
NFKBIZ	Pig	2.64792e-35	3.61385	693	96	9.67684e-31	Up-regulated
ENSSSCG00000022925	Pig	4.79031e-35	5.48384	602	36	1.75062e-30	Up-regulated
SERPINE1	Pig	3.34758e-34	5.87348	567	0.01	1.22337e-29	Up-regulated
PLVAP	Pig	4.78377e-34	3.11375	661	76	1.74823e-29	Up-regulated
ITGAV	Pig	1.4848e-33	3.62551	657	86	5.4262e-29	Up-regulated
KIT	Pig	8.84135e-33	1.7079	846	228	3.23107e-28	Up-regulated
ENSSSCG00000029160	Pig	3.58808e-32	6.61605	531	5	1.31126e-27	Up-regulated
DENND5B	Pig	5.85352e-32	3.07154	685	122	2.13917e-27	Up-regulated
DCAF6	Pig	9.40204e-32	2.56509	756	188	3.43597e-27	Up-regulated
RUNX2	Pig	1.18158e-31	7.06612	524	5	4.3181e-27	Up-regulated
NFIB	Pig	2.62109e-31	1.82459	898	411	9.57877e-27	Up-regulated
MGMT	Pig	6.04384e-31	2.4335	705	122	2.20872e-26	Up-regulated
ENPP1	Pig	8.59895e-31	2.96824	709	157	3.14249e-26	Up-regulated
CCSER2	Pig	3.73322e-30	2.33085	728	183	1.3643e-25	Up-regulated
EMP1	Pig	1.38667e-29	2.77461	697	137	5.0676e-25	Up-regulated
ISG12(A)	Pig	2.93142e-29	2.05425	783	218	1.07129e-24	Up-regulated
ADAMTS6	Pig	3.05086e-28	4.92153	531	46	1.11494e-23	Up-regulated
ECM1	Pig	6.4626e-28	9.17039	465	0	2.36176e-23	Up-regulated
ST3GAL6	Pig	8.67658e-28	3.63399	547	46	3.17086e-23	Up-regulated
GJA1	Pig	1.24603e-27	9.26958	461	0	4.5536e-23	Up-regulated
ENSSSCG00000032436	Pig	1.66722e-27	2.32572	709	178	6.09287e-23	Up-regulated
PLPP1	Pig	2.04102e-27	2.02413	886	452	7.45891e-23	Up-regulated
HSPB1	Pig	2.41704e-27	3.08414	555	46	8.83307e-23	Up-regulated
ERC1	Pig	3.09075e-27	1.67902	843	305	1.12951e-22	Up-regulated
STOM	Pig	7.40799e-27	2.3923	685	142	2.70725e-22	Up-regulated
CLIC4	Pig	1.50115e-26	1.6569	835	0.31	5.48597e-22	Up-regulated
BST2	Pig	2.0496e-26	1.83875	0.72	157	7.49026e-22	Up-regulated
TBL1XR1	Pig	3.36039e-26	2.1627	693	173	1.22806e-21	Up-regulated
WWTR1	Pig	4.35134e-26	2.20691	0.72	208	1.5902e-21	Up-regulated
HIF1A	Pig	5.06174e-26	2.19734	709	203	1.84981e-21	Up-regulated
RGS2	Pig	5.20344e-26	5.44172	465	15	1.9016e-21	Up-regulated
ENSSSCG00000005247	Pig	9.84109e-26	2.63125	0.61	96	3.59643e-21	Up-regulated
H3-5	Pig	1.20468e-25	2.10447	717	188	4.40252e-21	Up-regulated
ZFYVE9	Pig	1.35817e-25	2.49403	626	117	4.96345e-21	Up-regulated
ENSSSCG00000012006	Pig	1.66318e-25	2.27289	622	107	6.07809e-21	Up-regulated
FAM126A	Pig	1.89209e-25	2.08551	756	244	6.91463e-21	Up-regulated
LMO7	Pig	2.56586e-25	3.48194	551	76	9.37692e-21	Up-regulated
CAST	Pig	3.18148e-25	2.34931	618	117	1.16267e-20	Up-regulated
MDM2	Pig	3.66458e-25	2.96818	591	96	1.33922e-20	Up-regulated
MSRB3	Pig	3.90579e-25	2.43546	626	127	1.42737e-20	Up-regulated
LYST	Pig	6.07979e-25	2.47538	638	132	2.22186e-20	Up-regulated
CAMK2D	Pig	7.12844e-25	1.33174	0.89	442	2.60509e-20	Up-regulated
DUSP1	Pig	8.64445e-25	2.80845	583	91	3.15912e-20	Up-regulated
USP25	Pig	9.71479e-25	1.63027	811	315	3.55027e-20	Up-regulated
SLC38A2	Pig	1.08468e-24	2.26696	0.63	122	3.96398e-20	Up-regulated
RESF1	Pig	1.53659e-24	1.57519	783	259	5.61548e-20	Up-regulated
UBB	Pig	1.65372e-24	2.65172	598	112	6.04352e-20	Up-regulated
OSMR	Pig	1.69638e-24	2.19201	508	46	6.19941e-20	Up-regulated
RICTOR	Pig	2.04733e-24	1.98664	709	183	7.48196e-20	Up-regulated
ENSSSCG00000032591	Pig	2.66871e-24	2.34666	551	66	9.7528e-20	Up-regulated
DDIT4	Pig	3.75548e-24	2.24883	634	132	1.37244e-19	Up-regulated
ACTG1	Pig	3.92332e-24	2.62011	583	96	1.43378e-19	Up-regulated
SLC12A2	Pig	5.15514e-24	3.19727	571	107	1.88395e-19	Up-regulated
PPP3CA	Pig	8.47234e-24	1.11022	929	467	3.09622e-19	Up-regulated
PCDH17	Pig	1.0095e-23	1.5734	768	244	3.68922e-19	Up-regulated
SMCHD1	Pig	1.17356e-23	1.44734	906	396	4.28876e-19	Up-regulated
FAM167B	Pig	1.72331e-23	2.10305	535	71	6.29783e-19	Up-regulated
ANXA5	Pig	2.57692e-23	1.66875	744	228	9.41734e-19	Up-regulated
USP18	Pig	4.10089e-23	1.571	697	188	1.49867e-18	Up-regulated
DTX3L	Pig	4.89851e-23	2.27887	547	81	1.79016e-18	Up-regulated
IFIT2	Pig	7.30028e-23	2.92537	524	71	2.66789e-18	Up-regulated
ZMAT3	Pig	7.50693e-23	4.92391	406	5	2.74341e-18	Up-regulated
VMP1	Pig	8.02689e-23	1.92875	654	152	2.93343e-18	Up-regulated
ENSSSCG00000038187	Pig	8.88551e-23	4.1063	457	36	3.24721e-18	Up-regulated
CD2AP	Pig	1.02171e-22	1.86669	0.63	142	3.73385e-18	Up-regulated
ENSSSCG00000014565	Pig	1.75975e-22	1.72496	728	218	6.43102e-18	Up-regulated
IGF2BP2	Pig	1.79142e-22	1.68157	724	218	6.54675e-18	Up-regulated
GALNT15	Pig	1.93555e-22	2.72655	512	66	7.07347e-18	Up-regulated
XPC	Pig	2.23797e-22	4.75074	413	15	8.17865e-18	Up-regulated
APP	Pig	3.56132e-22	1.23674	945	624	1.30148e-17	Up-regulated
PHC3	Pig	4.16064e-22	1.64953	756	239	1.52051e-17	Up-regulated
ADGRL4	Pig	5.5412e-22	1.69905	811	386	2.02503e-17	Up-regulated
GPR161	Pig	6.02861e-22	2.66055	567	107	2.20315e-17	Up-regulated
ZFP36L2	Pig	7.62076e-22	1.92794	709	218	2.78501e-17	Up-regulated
PLSCR4	Pig	8.75869e-22	2.43915	614	173	3.20087e-17	Up-regulated
PARP14	Pig	1.30221e-21	1.44208	689	188	4.75892e-17	Up-regulated
EMCN	Pig	1.3474e-21	1.36737	862	421	4.92408e-17	Up-regulated
CAVIN3	Pig	1.42723e-21	2.65935	469	46	5.21581e-17	Up-regulated
PDK4	Pig	1.59721e-21	6.82394	382	5	5.83701e-17	Up-regulated
FGF2	Pig	1.73776e-21	2.00163	559	107	6.35064e-17	Up-regulated
ATP8B1	Pig	2.29235e-21	2.8005	543	112	8.37738e-17	Up-regulated
RPL28	Pig	2.67183e-21	1.7881	551	81	9.76419e-17	Up-regulated
FILIP1L	Pig	4.48117e-21	2.29816	535	86	1.63764e-16	Up-regulated
ENSSSCG00000034976	Pig	4.65171e-21	3.93246	437	41	1.69997e-16	Up-regulated
FABP4	Pig	9.43149e-21	2.02438	0.65	198	3.44674e-16	Up-regulated
RNF220	Pig	1.07495e-20	1.88781	606	147	3.92842e-16	Up-regulated
MRTFB	Pig	1.53431e-20	1.48741	0.87	503	5.60713e-16	Up-regulated
PAPSS1	Pig	1.5848e-20	2.51422	484	66	5.79167e-16	Up-regulated
ENSSSCG00000009240	Pig	2.51865e-20	3.50051	402	0.02	9.20439e-16	Up-regulated
ENSSSCG00000035904	Pig	2.79232e-20	1.42432	535	91	1.02045e-15	Up-regulated
OLA1	Pig	4.29585e-20	2.99282	449	46	1.56992e-15	Up-regulated
PLSCR1	Pig	4.36679e-20	1.744	606	142	1.59584e-15	Up-regulated
DCLK2	Pig	4.98871e-20	2.1447	547	96	1.82312e-15	Up-regulated
ZNF654	Pig	5.26268e-20	2.23362	579	137	1.92325e-15	Up-regulated
KDR	Pig	5.43565e-20	1.7649	594	137	1.98646e-15	Up-regulated
RYK	Pig	6.15409e-20	2.33415	504	76	2.24901e-15	Up-regulated
SRPK2	Pig	6.5693e-20	1.49067	0.78	294	2.40075e-15	Up-regulated
ATP10D	Pig	7.82307e-20	2.08465	0.52	86	2.85894e-15	Up-regulated
HSPA8	Pig	8.57886e-20	2.13649	567	132	3.13514e-15	Up-regulated
CSNK1G1	Pig	8.87468e-20	1.83849	618	152	3.24325e-15	Up-regulated
THBS1	Pig	1.21661e-19	2.9654	465	61	4.44609e-15	Up-regulated
SLK	Pig	1.24449e-19	1.98882	571	132	4.54798e-15	Up-regulated
FGD6	Pig	1.35628e-19	2.46632	512	91	4.95653e-15	Up-regulated
PKM	Pig	1.42819e-19	2.9521	461	61	5.21933e-15	Up-regulated
MX1	Pig	1.63755e-19	0.974089	732	223	5.98444e-15	Up-regulated
PELI2	Pig	1.8767e-19	0.929546	811	0.33	6.85839e-15	Up-regulated
IFI44L	Pig	2.26614e-19	1.03226	807	305	8.28162e-15	Up-regulated
UGP2	Pig	2.65935e-19	2.83485	461	66	9.71861e-15	Up-regulated
KLHL5	Pig	2.95081e-19	1.87616	547	112	1.07837e-14	Up-regulated
TXNIP	Pig	3.73991e-19	1.34495	772	315	1.36675e-14	Up-regulated
CCDC6	Pig	3.80956e-19	2.60363	461	66	1.3922e-14	Up-regulated
SAMD9	Pig	4.03659e-19	1.32724	0.65	168	1.47517e-14	Up-regulated
CHRM2	Pig	4.24713e-19	5.64302	346	5	1.55211e-14	Up-regulated
DDX60	Pig	4.53017e-19	1.76162	559	122	1.65555e-14	Up-regulated
GHSR	Pig	5.59199e-19	1.43191	0.72	269	2.04359e-14	Up-regulated
BMPR2	Pig	5.62696e-19	1.37466	854	411	2.05637e-14	Up-regulated
ISG20	Pig	7.03064e-19	7.94767	331	0	2.56935e-14	Up-regulated
SLC25A36	Pig	1.1078e-18	1.77623	638	188	4.04845e-14	Up-regulated
ARNTL2	Pig	1.3749e-18	3.98415	0.37	0.02	5.02457e-14	Up-regulated
SVIL	Pig	1.44218e-18	1.04724	866	442	5.27045e-14	Up-regulated
CTSC	Pig	1.53995e-18	5.24738	346	0.01	5.62775e-14	Up-regulated
MBNL1	Pig	2.03761e-18	1.15759	862	411	7.44646e-14	Up-regulated
TNKS	Pig	2.24099e-18	1.41728	661	198	8.18969e-14	Up-regulated
PLEKHA7	Pig	2.43694e-18	3.36013	406	41	8.90579e-14	Up-regulated
SLMAP	Pig	2.69127e-18	1.81694	598	183	9.83525e-14	Up-regulated
PPFIBP1	Pig	2.84568e-18	1.163	862	447	1.03996e-13	Up-regulated
SDCBP	Pig	4.1468e-18	1.28616	602	142	1.51545e-13	Up-regulated
UCK2	Pig	5.79272e-18	5.11131	339	0.01	2.11695e-13	Up-regulated
LAMP2	Pig	6.57853e-18	2.53406	449	66	2.40412e-13	Up-regulated
TSPAN12	Pig	9.42462e-18	4.02341	339	0.01	3.44423e-13	Up-regulated
GAPDH	Pig	1.01121e-17	1.69808	496	81	3.69546e-13	Up-regulated
TIMP1	Pig	1.27357e-17	6.8328	319	5	4.65426e-13	Up-regulated
ENSSSCG00000035751	Pig	1.2862e-17	4.47056	358	25	4.70043e-13	Up-regulated
OSBPL3	Pig	1.39965e-17	5.21316	339	15	5.11504e-13	Up-regulated
KCNN2	Pig	1.41473e-17	2.65261	496	112	5.17013e-13	Up-regulated
HSP90AA1	Pig	1.53998e-17	2.14105	531	127	5.62787e-13	Up-regulated
RAD51B	Pig	1.58653e-17	1.44984	713	269	5.79798e-13	Up-regulated
DDR2	Pig	2.34756e-17	1.70044	504	107	8.57917e-13	Up-regulated
USP53	Pig	2.52322e-17	3.15377	461	96	9.22111e-13	Up-regulated
FBXL20	Pig	2.95682e-17	1.45086	646	188	1.08057e-12	Up-regulated
IVNS1ABP	Pig	3.23643e-17	2.81214	469	96	1.18275e-12	Up-regulated
SETD7	Pig	3.29823e-17	2.65145	421	56	1.20534e-12	Up-regulated
ENSSSCG00000006395	Pig	3.64982e-17	2.27741	433	61	1.33383e-12	Up-regulated
NCKAP1	Pig	3.65323e-17	1.36566	728	259	1.33507e-12	Up-regulated
TRANK1	Pig	4.44966e-17	2.29047	449	71	1.62613e-12	Up-regulated
FBXO39	Pig	7.21464e-17	1.14221	614	157	2.63659e-12	Up-regulated
STC2	Pig	7.45144e-17	3.87573	335	15	2.72313e-12	Up-regulated
DOCK4	Pig	7.75304e-17	1.08053	894	528	2.83335e-12	Up-regulated
NUFIP2	Pig	7.86375e-17	1.10093	709	228	2.87381e-12	Up-regulated
INPP5D	Pig	8.27969e-17	2.09004	413	51	3.02581e-12	Up-regulated
TMEM123	Pig	9.26711e-17	3.20527	378	41	3.38666e-12	Up-regulated
HNRNPDL	Pig	1.17032e-16	1.07398	693	234	4.27694e-12	Up-regulated
RASSF9	Pig	1.44962e-16	2.9725	0.37	36	5.29764e-12	Up-regulated
PLCB1	Pig	1.77342e-16	1.39911	862	614	6.48096e-12	Up-regulated
ANGPT2	Pig	1.83351e-16	3.6172	354	0.03	6.70055e-12	Up-regulated
SUCLG2	Pig	1.87224e-16	1.62239	622	203	6.84209e-12	Up-regulated
PSMA6	Pig	1.94079e-16	1.56956	551	132	7.0926e-12	Up-regulated
PTPRK	Pig	2.28415e-16	1.49989	0.72	345	8.34744e-12	Up-regulated
PALMD	Pig	2.41231e-16	1.85557	504	112	8.81578e-12	Up-regulated
LRRFIP2	Pig	2.4667e-16	2.57823	429	76	9.01454e-12	Up-regulated
SLC10A7	Pig	2.48601e-16	1.64319	0.52	112	9.08512e-12	Up-regulated
IFI44	Pig	2.50335e-16	0.756926	669	208	9.14849e-12	Up-regulated
DNAJC13	Pig	3.19852e-16	1.10139	717	254	1.1689e-11	Up-regulated
PPFIA2	Pig	3.23399e-16	2.5181	394	51	1.18186e-11	Up-regulated
PSAP	Pig	3.3261e-16	1.51334	626	208	1.21552e-11	Up-regulated
HSP90B1	Pig	3.38239e-16	2.214	394	46	1.23609e-11	Up-regulated
SLC39A14	Pig	4.03818e-16	1.13715	744	274	1.47575e-11	Up-regulated
C2CD3	Pig	5.9327e-16	1.96163	429	71	2.16811e-11	Up-regulated
TBC1D5	Pig	6.19042e-16	1.0508	819	371	2.26229e-11	Up-regulated
IL13RA1	Pig	6.36156e-16	2.67939	382	46	2.32483e-11	Up-regulated
ADGRF4	Pig	8.36275e-16	2.47919	0.35	0.03	3.05617e-11	Up-regulated
ENO1	Pig	9.18761e-16	2.19403	433	76	3.35761e-11	Up-regulated
MTMR2	Pig	1.21022e-15	1.73222	465	91	4.42273e-11	Up-regulated
HERC5	Pig	1.23536e-15	0.783521	728	269	4.51461e-11	Up-regulated
NAV2	Pig	1.27337e-15	1.81698	563	173	4.65353e-11	Up-regulated
PRSS23	Pig	1.44241e-15	3.85755	311	15	5.27127e-11	Up-regulated
LRRFIP1	Pig	1.526e-15	1.55825	606	198	5.57675e-11	Up-regulated
OASL	Pig	1.59494e-15	7.97237	276	0	5.8287e-11	Up-regulated
ADAM9	Pig	1.66159e-15	1.2004	626	198	6.07228e-11	Up-regulated
UBE2K	Pig	1.78789e-15	1.50828	571	173	6.53385e-11	Up-regulated
CARMIL1	Pig	1.89684e-15	0.707978	807	0.35	6.93201e-11	Up-regulated
PHLPP1	Pig	1.92814e-15	1.28265	681	244	7.0464e-11	Up-regulated
ENSSSCG00000013889	Pig	2.07399e-15	2.26083	421	71	7.57939e-11	Up-regulated
MBD2	Pig	2.4065e-15	1.41059	535	142	8.79455e-11	Up-regulated
TMEM131	Pig	2.60026e-15	1.2462	681	244	9.50266e-11	Up-regulated
ENSSSCG00000014997	Pig	2.83905e-15	1.2261	512	122	1.03753e-10	Up-regulated
ENSSSCG00000017754	Pig	3.62874e-15	1.268	0.52	127	1.32612e-10	Up-regulated
STRN	Pig	4.75975e-15	2.48721	0.37	51	1.73945e-10	Up-regulated
RPL29	Pig	5.08829e-15	1.88538	406	66	1.85952e-10	Up-regulated
TMEM243	Pig	5.35401e-15	2.5243	0.35	36	1.95662e-10	Up-regulated
ASCC3	Pig	5.58287e-15	1.07603	748	305	2.04026e-10	Up-regulated
CORO1C	Pig	5.61493e-15	1.47152	571	162	2.05198e-10	Up-regulated
ACTB	Pig	6.37156e-15	1.21291	512	127	2.32849e-10	Up-regulated
RPL11	Pig	6.74643e-15	2.21213	378	51	2.46548e-10	Up-regulated
HIVEP2	Pig	6.7942e-15	1.33714	709	305	2.48294e-10	Up-regulated
MIF	Pig	7.85541e-15	2.94619	303	15	2.87076e-10	Up-regulated
ENSSSCG00000004578	Pig	8.5537e-15	1.97397	449	91	3.12595e-10	Up-regulated
MINDY2	Pig	9.64278e-15	1.294	551	162	3.52395e-10	Up-regulated
CD109	Pig	9.71775e-15	2.7097	358	46	3.55135e-10	Up-regulated
ORC4	Pig	9.8073e-15	1.17304	614	188	3.58408e-10	Up-regulated
ZCCHC7	Pig	1.0126e-14	1.03828	764	0.31	3.70056e-10	Up-regulated
IFIT5	Pig	1.56469e-14	1.18839	551	157	5.71815e-10	Up-regulated
SPRED1	Pig	1.64572e-14	0.990331	646	223	6.01427e-10	Up-regulated
IFIH1	Pig	1.83392e-14	0.750573	744	289	6.70206e-10	Up-regulated
UBE2V2	Pig	1.8406e-14	1.32163	591	193	6.72647e-10	Up-regulated
EPS8	Pig	2.40508e-14	1.12966	618	203	8.78935e-10	Up-regulated
NPSR1	Pig	2.48702e-14	1.28518	0.48	112	9.08881e-10	Up-regulated
TTC14	Pig	2.51451e-14	1.16426	559	162	9.1893e-10	Up-regulated
PSMC6	Pig	2.56542e-14	1.47955	575	183	9.37533e-10	Up-regulated
ABL2	Pig	2.7088e-14	2.01435	437	96	9.89932e-10	Up-regulated
ARHGAP29	Pig	2.75823e-14	0.873388	854	421	1.008e-09	Up-regulated
INVS	Pig	2.90712e-14	1.45999	535	147	1.06241e-09	Up-regulated
CHORDC1	Pig	2.99477e-14	1.85566	421	81	1.09444e-09	Up-regulated
SEC24D	Pig	3.07647e-14	1.98226	461	112	1.1243e-09	Up-regulated
CTNNA1	Pig	3.19827e-14	1.03396	764	0.36	1.16881e-09	Up-regulated
CAV2	Pig	3.41387e-14	2.43512	354	46	1.2476e-09	Up-regulated
MPDZ	Pig	3.68693e-14	1.55863	524	152	1.34739e-09	Up-regulated
ATP11C	Pig	4.47039e-14	1.61201	508	132	1.6337e-09	Up-regulated
REV3L	Pig	4.50121e-14	1.35819	661	249	1.64497e-09	Up-regulated
ENSSSCG00000002260	Pig	4.53411e-14	1.37309	587	193	1.65699e-09	Up-regulated
BCL2L1	Pig	5.00443e-14	1.70523	547	178	1.82887e-09	Up-regulated
EFL1	Pig	5.11339e-14	2.48566	374	61	1.86869e-09	Up-regulated
ITPR1	Pig	5.19358e-14	1.02639	0.65	218	1.89799e-09	Up-regulated
ENSSSCG00000016263	Pig	5.99154e-14	0.702099	862	437	2.18961e-09	Up-regulated
BNIP3	Pig	6.81266e-14	4.48731	287	0.02	2.48969e-09	Up-regulated
CHST1	Pig	7.002e-14	2.36155	339	41	2.55888e-09	Up-regulated
RPS15	Pig	7.01967e-14	0.905734	555	157	2.56534e-09	Up-regulated
AGMO	Pig	7.23921e-14	1.68396	409	81	2.64557e-09	Up-regulated
PNPT1	Pig	7.54354e-14	1.95549	362	51	2.75679e-09	Up-regulated
CANX	Pig	7.66633e-14	1.98231	429	96	2.80166e-09	Up-regulated
ATP1B1	Pig	7.94846e-14	5.15297	268	0.01	2.90477e-09	Up-regulated
FNDC3B	Pig	8.01787e-14	0.795107	878	482	2.93013e-09	Up-regulated
DNAJB4	Pig	8.27306e-14	2.46505	362	61	3.02339e-09	Up-regulated
S100A11	Pig	8.31218e-14	1.88592	319	0.03	3.03769e-09	Up-regulated
SLC38A9	Pig	8.75937e-14	0.794176	484	112	3.20111e-09	Up-regulated
RAD23B	Pig	9.07908e-14	1.87413	409	76	3.31795e-09	Up-regulated
DPY19L1	Pig	9.3899e-14	1.52631	0.48	127	3.43154e-09	Up-regulated
MGAT4A	Pig	9.76141e-14	0.763783	594	188	3.56731e-09	Up-regulated
ENSSSCG00000015390	Pig	9.8017e-14	1.16885	402	71	3.58203e-09	Up-regulated
TBC1D32	Pig	1.00762e-13	3.08619	327	41	3.68235e-09	Up-regulated
TMTC2	Pig	1.08383e-13	0.820507	874	497	3.96087e-09	Up-regulated
TRIM22	Pig	1.17306e-13	1.18537	587	183	4.28696e-09	Up-regulated
MAP1B	Pig	1.1973e-13	1.4479	508	147	4.37553e-09	Up-regulated
FLNB	Pig	1.46138e-13	1.44155	0.5	137	5.34062e-09	Up-regulated
PAM	Pig	1.49683e-13	0.942785	764	0.32	5.47016e-09	Up-regulated
ARHGEF26	Pig	1.63676e-13	1.4055	0.52	152	5.98153e-09	Up-regulated
EPSTI1	Pig	1.64661e-13	0.908963	559	162	6.01755e-09	Up-regulated
HSD17B12	Pig	1.71152e-13	1.78343	398	76	6.25474e-09	Up-regulated
DEPP1	Pig	1.78812e-13	2.09983	346	51	6.53469e-09	Up-regulated
RASA1	Pig	1.82689e-13	1.14532	575	178	6.67635e-09	Up-regulated
SUPT3H	Pig	1.89657e-13	1.39947	516	142	6.931e-09	Up-regulated
FBXW7	Pig	2.05617e-13	1.34105	512	157	7.51426e-09	Up-regulated
STT3B	Pig	2.29912e-13	1.27857	449	112	8.40212e-09	Up-regulated
PCDHGA4	Pig	2.3054e-13	1.31165	618	218	8.42509e-09	Up-regulated
ENSSSCG00000005453	Pig	2.42975e-13	3.91582	264	0.01	8.87951e-09	Up-regulated
MED13L	Pig	2.61661e-13	0.814128	937	655	9.56242e-09	Up-regulated
RAP1GDS1	Pig	2.71124e-13	2.13843	358	56	9.90824e-09	Up-regulated
AOPEP	Pig	2.82696e-13	0.677687	886	528	1.03311e-08	Up-regulated
ENSSSCG00000017509	Pig	2.85788e-13	1.99611	362	56	1.04441e-08	Up-regulated
ACTN4	Pig	2.8652e-13	1.27228	626	234	1.04709e-08	Up-regulated
CD47	Pig	2.92627e-13	1.18662	614	223	1.0694e-08	Up-regulated
PIK3CA	Pig	3.12534e-13	1.27887	508	142	1.14215e-08	Up-regulated
DLG1	Pig	3.34894e-13	1.39565	622	249	1.22387e-08	Up-regulated
GNB4	Pig	3.43404e-13	1.20265	378	66	1.25497e-08	Up-regulated
SLC20A2	Pig	3.50038e-13	2.53209	366	71	1.27921e-08	Up-regulated
NOP58	Pig	3.85085e-13	1.60709	441	102	1.40729e-08	Up-regulated
NIBAN2	Pig	4.22505e-13	2.12469	346	51	1.54404e-08	Up-regulated
PPARG	Pig	4.7544e-13	1.29261	457	117	1.73749e-08	Up-regulated
ANO6	Pig	4.87964e-13	0.70344	0.87	416	1.78326e-08	Up-regulated
ENSSSCG00000039582	Pig	5.54779e-13	1.13282	449	107	2.02744e-08	Up-regulated
VCL	Pig	5.92871e-13	1.22402	594	234	2.16665e-08	Up-regulated
VIM	Pig	6.57703e-13	1.94912	445	117	2.40358e-08	Up-regulated
SLC25A24	Pig	6.79397e-13	0.818995	0.48	132	2.48286e-08	Up-regulated
CD81	Pig	7.03246e-13	1.59449	504	147	2.57001e-08	Up-regulated
IL4R	Pig	7.24921e-13	1.67602	413	91	2.64923e-08	Up-regulated
IRF2	Pig	7.45237e-13	0.720969	571	178	2.72347e-08	Up-regulated
IFIT1	Pig	7.68829e-13	0.902224	736	325	2.80969e-08	Up-regulated
CLCA1	Pig	8.03629e-13	5.631	0.24	5	2.93686e-08	Up-regulated
FNIP1	Pig	8.83377e-13	1.30379	547	173	3.2283e-08	Up-regulated
MAP4	Pig	9.2293e-13	1.03113	622	234	3.37285e-08	Up-regulated
ENSSSCG00000037274	Pig	9.26966e-13	0.709207	622	208	3.3876e-08	Up-regulated
LAPTM4A	Pig	9.29724e-13	1.92476	378	71	3.39768e-08	Up-regulated
RPL37A	Pig	9.44398e-13	1.22648	421	91	3.4513e-08	Up-regulated
PARD3	Pig	9.86744e-13	1.1122	681	264	3.60606e-08	Up-regulated
MPZL1	Pig	9.94547e-13	2.44148	0.35	61	3.63457e-08	Up-regulated
S100A6	Pig	1.03852e-12	4.08462	252	0.01	3.79526e-08	Up-regulated
ARPC2	Pig	1.07218e-12	0.768152	535	157	3.91827e-08	Up-regulated
PDIA3	Pig	1.08893e-12	1.4712	429	96	3.97948e-08	Up-regulated
TRMT1L	Pig	1.09247e-12	0.942112	512	152	3.99244e-08	Up-regulated
SCFD2	Pig	1.14502e-12	0.996476	618	208	4.18448e-08	Up-regulated
PRKD1	Pig	1.15143e-12	0.796681	835	492	4.2079e-08	Up-regulated
FEZ2	Pig	1.17468e-12	2.15629	343	56	4.29288e-08	Up-regulated
LGALS8	Pig	1.22052e-12	0.923252	441	102	4.46041e-08	Up-regulated
ENSSSCG00000023158	Pig	1.23274e-12	2.79493	276	0.02	4.50506e-08	Up-regulated
LPP	Pig	1.23763e-12	0.909491	874	523	4.52294e-08	Up-regulated
ECPAS	Pig	1.28759e-12	1.09736	654	249	4.70549e-08	Up-regulated
RPL15	Pig	1.37774e-12	2.11728	354	61	5.03497e-08	Up-regulated
FAM111A	Pig	1.40456e-12	7.42446	224	0	5.13295e-08	Up-regulated
MLXIP	Pig	1.41907e-12	0.950265	559	188	5.18601e-08	Up-regulated
ENSSSCG00000010448	Pig	1.83905e-12	1.90466	339	56	6.72079e-08	Up-regulated
CFL1	Pig	1.92036e-12	3.06282	0.26	15	7.01794e-08	Up-regulated
ESCO1	Pig	2.1281e-12	1.09579	587	208	7.77716e-08	Up-regulated
MSN	Pig	2.20562e-12	0.713636	0.63	223	8.06043e-08	Up-regulated
BTBD1	Pig	2.24662e-12	1.84557	386	81	8.21029e-08	Up-regulated
R3HDM1	Pig	2.31651e-12	1.33906	512	157	8.46569e-08	Up-regulated
ETV4	Pig	2.33135e-12	7.62448	0.22	0	8.51991e-08	Up-regulated
C1orf21	Pig	2.37409e-12	1.07871	689	305	8.67612e-08	Up-regulated
ENSSSCG00000011237	Pig	2.53069e-12	0.997812	654	249	9.24839e-08	Up-regulated
ENSSSCG00000014242	Pig	2.60769e-12	1.62778	366	76	9.5298e-08	Up-regulated
SPTBN1	Pig	2.64019e-12	0.565417	969	832	9.64856e-08	Up-regulated
MCPH1	Pig	2.70027e-12	2.34069	346	61	9.86814e-08	Up-regulated
LGALS3BP	Pig	2.721e-12	2.12655	311	41	9.9439e-08	Up-regulated
PCMTD1	Pig	2.90245e-12	1.14392	567	213	1.0607e-07	Up-regulated
TBC1D1	Pig	3.04162e-12	0.844313	0.61	218	1.11156e-07	Up-regulated
MPC2	Pig	3.04414e-12	3.39202	287	36	1.11248e-07	Up-regulated
SPATA5	Pig	3.31684e-12	1.00981	539	183	1.21214e-07	Up-regulated
CTNND1	Pig	3.33011e-12	0.76871	0.74	0.32	1.21699e-07	Up-regulated
RBFOX2	Pig	3.74961e-12	0.793676	768	345	1.3703e-07	Up-regulated
RABGAP1	Pig	3.81651e-12	1.12249	571	198	1.39474e-07	Up-regulated
MALT1	Pig	3.95919e-12	2.00122	0.35	61	1.44689e-07	Up-regulated
ENSSSCG00000039071	Pig	3.99699e-12	2.03715	299	36	1.4607e-07	Up-regulated
ADAMTS9	Pig	4.33393e-12	0.980014	768	431	1.58384e-07	Up-regulated
RPLP0	Pig	4.45779e-12	1.20563	417	96	1.6291e-07	Up-regulated
CPEB4	Pig	4.68884e-12	1.55736	445	127	1.71354e-07	Up-regulated
HSPH1	Pig	4.78999e-12	2.86301	264	0.02	1.7505e-07	Up-regulated
MYO1E	Pig	4.82863e-12	0.800307	811	477	1.76462e-07	Up-regulated
ENSSSCG00000007692	Pig	4.89291e-12	1.75614	331	51	1.78811e-07	Up-regulated
AP3B1	Pig	4.92379e-12	0.641884	689	264	1.7994e-07	Up-regulated
B2M	Pig	5.09207e-12	0.615172	902	543	1.8609e-07	Up-regulated
ANKRD17	Pig	5.18371e-12	0.824574	705	315	1.89439e-07	Up-regulated
WDR26	Pig	5.24783e-12	1.78875	354	66	1.91782e-07	Up-regulated
FAM151B	Pig	5.33044e-12	3.49447	252	15	1.94801e-07	Up-regulated
CTTNBP2NL	Pig	5.89697e-12	0.773489	547	188	2.15505e-07	Up-regulated
GOLM2	Pig	7.4e-12	1.21987	484	137	2.70433e-07	Up-regulated
C3orf38	Pig	7.43422e-12	1.41975	0.39	86	2.71684e-07	Up-regulated
MKLN1	Pig	7.52639e-12	0.741888	803	431	2.75052e-07	Up-regulated
LAMA4	Pig	7.95766e-12	0.971507	701	335	2.90813e-07	Up-regulated
TYMS	Pig	8.09199e-12	3.58721	224	5	2.95722e-07	Up-regulated
ENSSSCG00000014540	Pig	8.21319e-12	1.37299	402	91	3.00151e-07	Up-regulated
CLCN5	Pig	8.49165e-12	1.57951	0.37	76	3.10327e-07	Up-regulated
SNX10	Pig	8.55153e-12	0.933633	461	122	3.12516e-07	Up-regulated
TM4SF1	Pig	8.72992e-12	1.1325	461	127	3.19035e-07	Up-regulated
MBNL2	Pig	8.84969e-12	0.806124	752	355	3.23412e-07	Up-regulated
ZNF366	Pig	8.88931e-12	0.985459	0.63	239	3.2486e-07	Up-regulated
EHD4	Pig	9.19772e-12	0.89912	0.48	137	3.36131e-07	Up-regulated
6,00 LSM	Pig	9.2293e-12	1.46651	429	117	3.37285e-07	Up-regulated
CHD1	Pig	9.79992e-12	0.993345	579	198	3.58138e-07	Up-regulated
RAPGEF4	Pig	9.89704e-12	1.02184	776	457	3.61687e-07	Up-regulated
UBP1	Pig	1.02502e-11	1.19809	469	127	3.74594e-07	Up-regulated
NEDD9	Pig	1.03783e-11	0.995076	669	264	3.79275e-07	Up-regulated
PDLIM1	Pig	1.08702e-11	1.24053	512	168	3.97253e-07	Up-regulated
TJP1	Pig	1.21444e-11	0.793492	665	274	4.43817e-07	Up-regulated
CHIC2	Pig	1.24038e-11	1.19554	583	228	4.53296e-07	Up-regulated
CPM	Pig	1.29729e-11	0.749435	378	86	4.74094e-07	Up-regulated
QDPR	Pig	1.34137e-11	2.76912	268	25	4.90203e-07	Up-regulated
FAM13A	Pig	1.38091e-11	1.31061	516	178	5.04653e-07	Up-regulated
SFXN1	Pig	1.40104e-11	1.87304	335	61	5.12009e-07	Up-regulated
GGH	Pig	1.4338e-11	1.91076	268	25	5.23981e-07	Up-regulated
PRICKLE1	Pig	1.48863e-11	1.84611	366	81	5.44018e-07	Up-regulated
GALK2	Pig	1.49907e-11	1.19887	445	122	5.47836e-07	Up-regulated
RPLP1	Pig	1.58321e-11	0.826163	551	183	5.78586e-07	Up-regulated
ENSSSCG00000016868	Pig	1.63651e-11	0.743926	0.76	0.34	5.98062e-07	Up-regulated
SNX25	Pig	1.65593e-11	0.891164	571	198	6.05161e-07	Up-regulated
NME2	Pig	1.73511e-11	3.01022	244	15	6.34094e-07	Up-regulated
ENSSSCG00000007188	Pig	1.88396e-11	1.26836	0.52	178	6.88493e-07	Up-regulated
CD93	Pig	1.90993e-11	0.790228	354	71	6.97983e-07	Up-regulated
TTC23	Pig	1.9402e-11	4.77324	217	5	7.09046e-07	Up-regulated
LUZP1	Pig	1.9697e-11	0.855834	744	0.34	7.19828e-07	Up-regulated
PLEKHA1	Pig	2.04928e-11	1.25782	626	254	7.48909e-07	Up-regulated
RELL1	Pig	2.13056e-11	1.92269	272	0.03	7.78613e-07	Up-regulated
HBP1	Pig	2.16561e-11	1.22859	437	112	7.91421e-07	Up-regulated
TMEM170A	Pig	2.20003e-11	2.94761	252	0.02	8.04003e-07	Up-regulated
ENSSSCG00000011272	Pig	2.45229e-11	1.43571	339	61	8.96191e-07	Up-regulated
SH3GLB1	Pig	2.62365e-11	0.867129	764	325	9.58814e-07	Up-regulated
USP6NL	Pig	2.82919e-11	1.42712	358	76	1.03393e-06	Up-regulated
ATF7IP	Pig	2.8484e-11	1.08716	0.48	142	1.04095e-06	Up-regulated
PCGF5	Pig	2.91542e-11	1.05374	543	198	1.06544e-06	Up-regulated
KLHL2	Pig	2.92269e-11	0.776904	528	168	1.0681e-06	Up-regulated
ELOVL5	Pig	2.93085e-11	1.55948	402	107	1.07108e-06	Up-regulated
IPMK	Pig	3.0488e-11	1.85966	283	36	1.11418e-06	Up-regulated
CXCL2	Pig	3.2305e-11	1.22508	496	178	1.18059e-06	Up-regulated
ENSSSCG00000013260	Pig	3.28535e-11	1.95667	303	46	1.20063e-06	Up-regulated
SLC35A1	Pig	3.48091e-11	1.39514	382	91	1.2721e-06	Up-regulated
PIK3C3	Pig	3.57568e-11	1.25076	433	122	1.30673e-06	Up-regulated
TGFBR3	Pig	3.61333e-11	0.895708	535	203	1.32049e-06	Up-regulated
TMSB10	Pig	3.75714e-11	1.02945	622	254	1.37305e-06	Up-regulated
MLLT10	Pig	3.76393e-11	0.875812	0.78	411	1.37553e-06	Up-regulated
PSME4	Pig	3.86829e-11	1.37476	0.48	157	1.41367e-06	Up-regulated
PSMB2	Pig	4.10442e-11	1.23414	449	127	1.49996e-06	Up-regulated
CFAP94	Pig	4.25265e-11	2.38558	256	25	1.55413e-06	Up-regulated
UHRF2	Pig	4.6499e-11	1.0426	0.48	147	1.69931e-06	Up-regulated
TAL1	Pig	4.65124e-11	1.42511	358	76	1.69979e-06	Up-regulated
TGFBR2	Pig	4.77802e-11	0.940922	622	249	1.74613e-06	Up-regulated
PRNP	Pig	5.24152e-11	3.61225	0.22	0.01	1.91551e-06	Up-regulated
ARHGEF28	Pig	5.35937e-11	1.43471	504	183	1.95858e-06	Up-regulated
FSTL1	Pig	5.50014e-11	2.11101	323	61	2.01003e-06	Up-regulated
ADM	Pig	5.52037e-11	5.10965	217	0.01	2.01742e-06	Up-regulated
DRAM1	Pig	5.66614e-11	1.48554	358	76	2.07069e-06	Up-regulated
TMEM135	Pig	5.74763e-11	1.0403	677	0.31	2.10047e-06	Up-regulated
STK38L	Pig	6.26886e-11	1.53699	402	107	2.29096e-06	Up-regulated
ELF2	Pig	6.79866e-11	0.766258	709	335	2.48457e-06	Up-regulated
RARS2	Pig	6.82839e-11	1.40805	362	81	2.49544e-06	Up-regulated
EIF3H	Pig	7.43633e-11	1.20882	433	122	2.71761e-06	Up-regulated
FAM171B	Pig	7.80458e-11	2.69745	0.24	0.02	2.85218e-06	Up-regulated
GPHN	Pig	7.93718e-11	0.772574	776	416	2.90064e-06	Up-regulated
ENAH	Pig	8.5875e-11	1.62257	445	142	3.1383e-06	Up-regulated
UPP1	Pig	8.75062e-11	4.64755	205	5	3.19791e-06	Up-regulated
USP24	Pig	9.74166e-11	1.31756	512	193	3.56009e-06	Up-regulated
XPO1	Pig	1.00307e-10	1.20641	449	132	3.66571e-06	Up-regulated
ADGRL2	Pig	1.03984e-10	0.669336	744	0.35	3.80008e-06	Up-regulated
BHLHE40	Pig	1.06331e-10	2.04807	291	46	3.88586e-06	Up-regulated
PSMD11	Pig	1.07665e-10	1.59115	327	61	3.93462e-06	Up-regulated
ELP4	Pig	1.13189e-10	1.74023	0.35	81	4.13648e-06	Up-regulated
ENSSSCG00000029830	Pig	1.14115e-10	0.760655	394	96	4.17033e-06	Up-regulated
CMSS1	Pig	1.17682e-10	1.59646	0.39	107	4.30069e-06	Up-regulated
ADK	Pig	1.18444e-10	1.37203	354	76	4.32855e-06	Up-regulated
TEX10	Pig	1.23515e-10	1.52148	429	127	4.51384e-06	Up-regulated
NM-001206399	Pig	1.24916e-10	6.93023	189	0	4.56505e-06	Up-regulated
YWHAZ	Pig	1.28801e-10	0.977414	575	234	4.70703e-06	Up-regulated
PSMD14	Pig	1.30568e-10	1.217	469	147	4.77161e-06	Up-regulated
CHD1L	Pig	1.3087e-10	1.26666	449	147	4.78266e-06	Up-regulated
MRPS27	Pig	1.34332e-10	1.86886	358	86	4.90917e-06	Up-regulated
NUDT6	Pig	1.34859e-10	2.46358	311	61	4.92843e-06	Up-regulated
PLAU	Pig	1.3923e-10	3.90685	213	0.01	5.08817e-06	Up-regulated
LMNA	Pig	1.41233e-10	2.17785	287	46	5.16135e-06	Up-regulated
ARL5A	Pig	1.43471e-10	1.96112	299	51	5.24316e-06	Up-regulated
EPHA4	Pig	1.44856e-10	1.96584	303	56	5.29376e-06	Up-regulated
CBX5	Pig	1.5134e-10	3.8892	213	0.01	5.53073e-06	Up-regulated
CCDC50	Pig	1.56302e-10	0.984942	402	102	5.71206e-06	Up-regulated
TRPM7	Pig	1.6997e-10	0.652582	724	0.34	6.21156e-06	Up-regulated
EGLN3	Pig	1.71866e-10	6.5525	197	5	6.28085e-06	Up-regulated
AVPI1	Pig	1.7336e-10	5.87568	197	5	6.33545e-06	Up-regulated
ARHGEF12	Pig	1.76165e-10	0.870106	752	371	6.43795e-06	Up-regulated
WNK1	Pig	1.78376e-10	0.954165	665	299	6.51875e-06	Up-regulated
WDFY1	Pig	1.89262e-10	1.03698	461	137	6.91658e-06	Up-regulated
UGGT1	Pig	1.95765e-10	1.04694	429	127	7.15422e-06	Up-regulated
PRMT3	Pig	1.98651e-10	1.50678	343	76	7.25969e-06	Up-regulated
SLC25A13	Pig	2.08501e-10	1.05893	441	132	7.61968e-06	Up-regulated
ENSSSCG00000028414	Pig	2.22585e-10	1.98923	303	56	8.13436e-06	Up-regulated
STAM	Pig	2.24434e-10	1.9931	287	46	8.20195e-06	Up-regulated
ENSSSCG00000033786	Pig	2.40918e-10	1.79007	315	66	8.80437e-06	Up-regulated
RPSA	Pig	2.54295e-10	1.17269	327	66	9.29322e-06	Up-regulated
RANBP6	Pig	2.56791e-10	1.53063	346	81	9.38442e-06	Up-regulated
SOCS5	Pig	2.75247e-10	0.811619	654	274	1.00589e-05	Up-regulated
TINAGL1	Pig	2.76441e-10	1.23311	441	142	1.01025e-05	Up-regulated
TXNL1	Pig	2.87206e-10	1.37879	0.39	107	1.0496e-05	Up-regulated
FKBP5	Pig	2.95175e-10	0.589406	933	741	1.07872e-05	Up-regulated
TMEM156	Pig	3.10695e-10	4.5883	205	0.01	1.13543e-05	Up-regulated
ALPK1	Pig	3.13077e-10	3.70957	217	15	1.14414e-05	Up-regulated
HSPA5	Pig	3.17547e-10	2.52015	0.24	25	1.16048e-05	Up-regulated
RSC1A1	Pig	3.37666e-10	1.67551	331	71	1.234e-05	Up-regulated
RAB6A	Pig	3.38058e-10	1.1782	421	117	1.23543e-05	Up-regulated
PHKB	Pig	3.40471e-10	0.870322	524	183	1.24425e-05	Up-regulated
TMEM47	Pig	3.46666e-10	5.14186	193	5	1.26689e-05	Up-regulated
NLK	Pig	3.63303e-10	1.12892	484	173	1.32769e-05	Up-regulated
DPP8	Pig	3.6681e-10	0.858546	437	127	1.34051e-05	Up-regulated
PPP1R13B	Pig	3.84114e-10	0.891499	567	213	1.40374e-05	Up-regulated
EGFLAM	Pig	4.05276e-10	0.880572	465	152	1.48108e-05	Up-regulated
ENSSSCG00000015011	Pig	4.20125e-10	1.23012	0.39	112	1.53535e-05	Up-regulated
CSNK1G3	Pig	4.29975e-10	0.929343	484	168	1.57134e-05	Up-regulated
C21orf91	Pig	4.32979e-10	1.3572	0.35	81	1.58232e-05	Up-regulated
DDX3X	Pig	4.33306e-10	1.14886	547	208	1.58352e-05	Up-regulated
GSK3B	Pig	4.34149e-10	0.786017	787	421	1.5866e-05	Up-regulated
TMCO1	Pig	4.34505e-10	1.43538	291	51	1.5879e-05	Up-regulated
METTL15	Pig	4.46735e-10	1.64654	299	56	1.63259e-05	Up-regulated
ENSSSCG00000043835	Pig	4.57562e-10	3.00654	236	25	1.67216e-05	Up-regulated
CACUL1	Pig	4.73625e-10	1.78182	315	66	1.73086e-05	Up-regulated
PPP4R2	Pig	4.78187e-10	1.00362	421	122	1.74754e-05	Up-regulated
RNF217	Pig	5.17892e-10	1.33953	358	91	1.89263e-05	Up-regulated
CNN3	Pig	5.22369e-10	1.18498	339	81	1.909e-05	Up-regulated
ENSSSCG00000010172	Pig	5.26387e-10	1.01363	531	188	1.92368e-05	Up-regulated
GNS	Pig	5.30377e-10	2.17018	248	0.03	1.93826e-05	Up-regulated
UBE2B	Pig	5.36323e-10	1.27689	437	137	1.95999e-05	Up-regulated
TRNP1	Pig	5.38272e-10	7.26932	177	0	1.96712e-05	Up-regulated
RLF	Pig	5.39979e-10	0.998091	547	218	1.97335e-05	Up-regulated
FBXL17	Pig	5.41574e-10	0.902328	646	294	1.97918e-05	Up-regulated
ACKR3	Pig	5.46471e-10	1.64274	354	91	1.99708e-05	Up-regulated
ANXA1	Pig	5.79954e-10	1.22676	256	36	2.11944e-05	Up-regulated
PPP2R2A	Pig	5.92806e-10	0.856307	646	284	2.16641e-05	Up-regulated
SND1	Pig	6.06758e-10	0.535315	531	193	2.2174e-05	Up-regulated
ACAP2	Pig	6.365e-10	0.586805	764	376	2.32609e-05	Up-regulated
MNDA	Pig	6.43095e-10	2.3533	224	0.02	2.35019e-05	Up-regulated
TGFBR1	Pig	6.88934e-10	2.42196	236	25	2.51771e-05	Up-regulated
C16orf72	Pig	7.20636e-10	1.57342	346	86	2.63356e-05	Up-regulated
XPNPEP1	Pig	7.28696e-10	0.963939	354	86	2.66302e-05	Up-regulated
UBC	Pig	7.40558e-10	1.02711	343	81	2.70637e-05	Up-regulated
SPAG9	Pig	7.46149e-10	0.853337	783	421	2.7268e-05	Up-regulated
HSD11B1L	Pig	7.76671e-10	0.955592	0.37	96	2.83834e-05	Up-regulated
CCDC14	Pig	7.92478e-10	1.40094	429	137	2.89611e-05	Up-regulated
NSD3	Pig	7.98511e-10	0.854179	646	294	2.91816e-05	Up-regulated
RPL35	Pig	8.02689e-10	1.17683	398	112	2.93343e-05	Up-regulated
RC3H1	Pig	8.06644e-10	0.70601	634	264	2.94788e-05	Up-regulated
DNAJC3	Pig	8.15258e-10	1.18784	362	91	2.97936e-05	Up-regulated
CLIP1	Pig	8.16533e-10	1.2983	0.5	188	2.98402e-05	Up-regulated
SLC25A12	Pig	8.28053e-10	1.83124	283	51	3.02612e-05	Up-regulated
PTP4A1	Pig	8.56485e-10	3.15782	0.22	0.02	3.13002e-05	Up-regulated
PSMA3	Pig	8.68653e-10	0.88873	374	96	3.17449e-05	Up-regulated
ZNF292	Pig	8.68952e-10	0.944049	555	213	3.17559e-05	Up-regulated
VPS13C	Pig	8.74084e-10	0.587978	594	259	3.19434e-05	Up-regulated
XPR1	Pig	8.80991e-10	1.21856	441	147	3.21958e-05	Up-regulated
CDIN1	Pig	8.99606e-10	2.10712	252	36	3.28761e-05	Up-regulated
ENPP4	Pig	9.08541e-10	1.39352	268	41	3.32026e-05	Up-regulated
COL12A1	Pig	9.12005e-10	3.10526	272	51	3.33292e-05	Up-regulated
CCDC91	Pig	9.13539e-10	1.12592	484	173	3.33853e-05	Up-regulated
ARMC2	Pig	9.17171e-10	2.32187	299	66	3.3518e-05	Up-regulated
HSP90AB1	Pig	9.45037e-10	1.78829	272	46	3.45364e-05	Up-regulated
SELENOF	Pig	1.00738e-09	2.17011	244	0.03	3.68145e-05	Up-regulated
PLOD2	Pig	1.0168e-09	1.57099	0.37	107	3.71591e-05	Up-regulated
PPA1	Pig	1.02896e-09	0.9408	303	61	3.76035e-05	Up-regulated
UBE2L6	Pig	1.04822e-09	0.851783	469	152	3.83072e-05	Up-regulated
PSMB8	Pig	1.05852e-09	1.10796	0.37	96	3.86835e-05	Up-regulated
TBC1D9	Pig	1.06796e-09	1.437	413	132	3.90286e-05	Up-regulated
IGFBP7	Pig	1.0712e-09	0.636134	709	335	3.91471e-05	Up-regulated
MEMO1	Pig	1.07502e-09	0.975726	425	127	3.92865e-05	Up-regulated
RPL27	Pig	1.0873e-09	3.07245	217	0.02	3.97356e-05	Up-regulated
CTIF	Pig	1.12013e-09	0.783735	531	193	4.09352e-05	Up-regulated
TMEM144	Pig	1.12564e-09	3.03849	228	25	4.11364e-05	Up-regulated
SLC30A7	Pig	1.12613e-09	0.661609	449	147	4.11545e-05	Up-regulated
EHBP1	Pig	1.16026e-09	0.84832	677	0.34	4.24015e-05	Up-regulated
DCBLD2	Pig	1.23318e-09	1.64228	299	61	4.50667e-05	Up-regulated
DARS1	Pig	1.23662e-09	0.926199	413	122	4.51925e-05	Up-regulated
AK4	Pig	1.2567e-09	0.842816	402	117	4.59263e-05	Up-regulated
IPO11	Pig	1.26309e-09	0.653614	496	168	4.61595e-05	Up-regulated
AASDHPPT	Pig	1.27278e-09	1.55379	244	0.03	4.65138e-05	Up-regulated
RCOR1	Pig	1.30411e-09	0.741797	508	183	4.76587e-05	Up-regulated
HCN1	Pig	1.3115e-09	4.82091	193	0.01	4.79286e-05	Up-regulated
ENSSSCG00000036115	Pig	1.34407e-09	1.56551	366	102	4.91192e-05	Up-regulated
TLK1	Pig	1.35106e-09	1.13245	571	244	4.93746e-05	Up-regulated
FAM204A	Pig	1.36784e-09	1.53312	276	46	4.99876e-05	Up-regulated
TPM4	Pig	1.38355e-09	0.952706	406	117	5.05617e-05	Up-regulated
MNAT1	Pig	1.38466e-09	1.14921	465	162	5.06023e-05	Up-regulated
TACC2	Pig	1.41992e-09	2.40053	264	46	5.18909e-05	Up-regulated
PPP2R5E	Pig	1.42947e-09	0.822496	638	269	5.22401e-05	Up-regulated
TM6SF1	Pig	1.47056e-09	0.729835	287	51	5.37417e-05	Up-regulated
SERPINH1	Pig	1.49731e-09	1.90639	0.24	0.03	5.47193e-05	Up-regulated
RUFY1	Pig	1.51171e-09	1.1125	0.37	102	5.52456e-05	Up-regulated
FBXW11	Pig	1.5151e-09	0.957066	583	249	5.53692e-05	Up-regulated
APOA1	Pig	1.56411e-09	2.93678	217	0.02	5.71606e-05	Up-regulated
PUM1	Pig	1.57995e-09	0.82436	685	325	5.77392e-05	Up-regulated
CTSS	Pig	1.65264e-09	1.18883	287	56	6.03959e-05	Up-regulated
ZRANB1	Pig	1.68845e-09	1.54131	315	71	6.17045e-05	Up-regulated
HACD1	Pig	1.72422e-09	2.11694	0.26	41	6.30115e-05	Up-regulated
ENSSSCG00000025499	Pig	1.75909e-09	1.87177	236	0.03	6.42859e-05	Up-regulated
RAB1A	Pig	1.7889e-09	0.870229	433	132	6.53753e-05	Up-regulated
FUBP1	Pig	1.79831e-09	1.1582	382	107	6.57191e-05	Up-regulated
ACSL5	Pig	1.9041e-09	0.853603	417	127	6.95852e-05	Up-regulated
TRAPPC11	Pig	1.94862e-09	2.31645	236	0.03	7.12124e-05	Up-regulated
MYO5A	Pig	1.98484e-09	0.855883	472	157	7.25361e-05	Up-regulated
ENSSSCG00000033189	Pig	2.00437e-09	1.7507	335	86	7.32497e-05	Up-regulated
AP3M1	Pig	2.084e-09	0.971348	402	117	7.61597e-05	Up-regulated
TMOD3	Pig	2.12372e-09	0.621464	669	299	7.76113e-05	Up-regulated
COL28A1	Pig	2.12669e-09	1.66585	0.28	56	7.77198e-05	Up-regulated
ACOT9	Pig	2.13372e-09	1.4104	409	127	7.79766e-05	Up-regulated
MGST3	Pig	2.26227e-09	2.2142	224	25	8.26747e-05	Up-regulated
ENSSSCG00000035811	Pig	2.27981e-09	1.28301	291	61	8.33156e-05	Up-regulated
ENSSSCG00000045769	Pig	2.28072e-09	7.32216	165	0	8.33487e-05	Up-regulated
FMNL2	Pig	2.43148e-09	0.858355	571	264	8.88586e-05	Up-regulated
ARL8B	Pig	2.44465e-09	1.99824	315	81	8.93397e-05	Up-regulated
VEZT	Pig	2.4734e-09	0.921909	484	173	9.03903e-05	Up-regulated
CNOT2	Pig	2.56545e-09	0.870591	638	289	9.37543e-05	Up-regulated
MTMR10	Pig	2.61083e-09	1.18901	406	127	9.54127e-05	Up-regulated
TMSB4X	Pig	2.64165e-09	0.83223	591	259	9.65393e-05	Up-regulated
NDUFA4	Pig	2.67678e-09	2.5589	213	0.02	9.78228e-05	Up-regulated
CNDP2	Pig	2.68839e-09	1.64262	0.26	41	9.82472e-05	Up-regulated
HERC4	Pig	2.7546e-09	0.705419	646	294	0.000100667	Up-regulated
FERMT1	Pig	2.88014e-09	0.712952	323	76	0.000105255	Up-regulated
CRIM1	Pig	3.04712e-09	0.955664	689	376	0.000111357	Up-regulated
MAP3K8	Pig	3.07186e-09	1.57388	0.28	56	0.000112261	Up-regulated
MAP2K1	Pig	3.18939e-09	0.799769	429	132	0.000116556	Up-regulated
DDX5	Pig	3.22064e-09	0.76135	744	426	0.000117698	Up-regulated
CDKN1A	Pig	3.2804e-09	1.70009	264	46	0.000119882	Up-regulated
PCYT1A	Pig	3.44615e-09	1.22344	307	66	0.000125939	Up-regulated
HERPUD1	Pig	3.63975e-09	1.40468	323	81	0.000133015	Up-regulated
XIAP	Pig	3.65131e-09	0.872297	524	213	0.000133437	Up-regulated
REEP3	Pig	3.66087e-09	0.642895	602	249	0.000133786	Up-regulated
ENSSSCG00000016629	Pig	3.7369e-09	1.6795	0.35	102	0.000136565	Up-regulated
CDC14A	Pig	3.75278e-09	1.14892	323	81	0.000137146	Up-regulated
ENSSSCG00000011729	Pig	3.82838e-09	1.09383	531	208	0.000139908	Up-regulated
GNA12	Pig	4.00486e-09	0.614986	413	127	0.000146358	Up-regulated
KCNN3	Pig	4.00686e-09	1.6503	252	41	0.000146431	Up-regulated
PDGFD	Pig	4.10851e-09	0.946946	614	294	0.000150145	Up-regulated
ARFGEF1	Pig	4.26012e-09	0.703403	657	294	0.000155686	Up-regulated
MAGT1	Pig	4.31734e-09	1.15238	366	102	0.000157777	Up-regulated
RNH1	Pig	4.32277e-09	1.87338	252	41	0.000157976	Up-regulated
KIF13A	Pig	4.63806e-09	0.865521	626	305	0.000169498	Up-regulated
GTF2F2	Pig	4.71159e-09	0.814875	366	107	0.000172185	Up-regulated
CSTB	Pig	4.81711e-09	2.36846	248	41	0.000176041	Up-regulated
GJC1	Pig	4.94563e-09	1.27252	291	61	0.000180738	Up-regulated
ASNS	Pig	4.99509e-09	1.52656	307	71	0.000182546	Up-regulated
CAPZA1	Pig	5.12108e-09	0.553001	0.48	168	0.00018715	Up-regulated
GNPTAB	Pig	5.12216e-09	1.45099	283	61	0.00018719	Up-regulated
TSPO	Pig	5.1803e-09	2.97801	185	0.01	0.000189314	Up-regulated
ENSSSCG00000027778	Pig	5.25021e-09	2.03895	272	56	0.000191869	Up-regulated
TNFRSF11A	Pig	5.44439e-09	0.613645	543	218	0.000198965	Up-regulated
SSR2	Pig	5.52983e-09	1.50482	248	41	0.000202088	Up-regulated
SIK3	Pig	5.60271e-09	0.788558	602	269	0.000204751	Up-regulated
NFIL3	Pig	5.91788e-09	6.95261	157	0	0.000216269	Up-regulated
GIGYF2	Pig	5.97193e-09	0.714651	531	203	0.000218244	Up-regulated
ADORA2A	Pig	5.99398e-09	1.80771	217	25	0.00021905	Up-regulated
JAK1	Pig	6.04775e-09	0.615675	0.74	386	0.000221015	Up-regulated
ENSSSCG00000025281	Pig	6.23801e-09	2.10234	264	51	0.000227968	Up-regulated
CDV3	Pig	6.45058e-09	0.846361	406	127	0.000235737	Up-regulated
ABI1	Pig	6.64923e-09	0.761787	508	188	0.000242996	Up-regulated
IARS1	Pig	6.76141e-09	0.785549	476	173	0.000247096	Up-regulated
LRRC32	Pig	6.87472e-09	2.47002	244	41	0.000251237	Up-regulated
RNF11	Pig	6.94013e-09	2.29939	252	46	0.000253627	Up-regulated
AMOTL2	Pig	7.10002e-09	2.34353	217	25	0.00025947	Up-regulated
PTPN14	Pig	7.20561e-09	0.709424	575	244	0.000263329	Up-regulated
FCHSD2	Pig	7.259e-09	0.617718	752	371	0.00026528	Up-regulated
ENSSSCG00000000473	Pig	7.28907e-09	2.19943	224	0.03	0.000266379	Up-regulated
KLHL24	Pig	7.33303e-09	1.29193	382	122	0.000267986	Up-regulated
GRN	Pig	7.43661e-09	1.47062	268	51	0.000271771	Up-regulated
ENSSSCG00000022032	Pig	7.91819e-09	1.37571	343	96	0.00028937	Up-regulated
CTNNB1	Pig	8.07277e-09	0.887428	531	203	0.000295019	Up-regulated
DOCK7	Pig	8.10856e-09	1.21832	425	152	0.000296327	Up-regulated
C8orf34	Pig	8.22814e-09	3.1166	181	0.01	0.000300697	Up-regulated
ACVR2A	Pig	8.45916e-09	1.27793	425	152	0.00030914	Up-regulated
SPG11	Pig	8.50628e-09	0.827183	0.39	122	0.000310862	Up-regulated
TPM3	Pig	8.51324e-09	0.887617	394	122	0.000311116	Up-regulated
RPS7	Pig	8.63928e-09	0.629977	417	127	0.000315722	Up-regulated
TRMT11	Pig	8.79857e-09	2.57194	228	36	0.000321544	Up-regulated
RAB10	Pig	8.85495e-09	0.851844	457	157	0.000323604	Up-regulated
TXNRD1	Pig	8.96022e-09	0.977137	421	142	0.000327451	Up-regulated
PARP9	Pig	9.18375e-09	0.942051	362	102	0.00033562	Up-regulated
RAB18	Pig	9.49805e-09	1.06087	362	107	0.000347106	Up-regulated
RPL18	Pig	9.74793e-09	0.746756	319	81	0.000356238	Up-regulated
ZMYM4	Pig	9.88289e-09	0.786316	429	142	0.00036117	Up-regulated
OAZ1	Pig	1.01308e-08	2.42312	201	0.02	0.000370231	Up-regulated
PRKN	Pig	1.05835e-08	1.32449	421	157	0.000386774	Up-regulated
VTI1A	Pig	1.07399e-08	0.699482	685	0.33	0.000392488	Up-regulated
ARHGEF33	Pig	1.07745e-08	2.03765	0.26	51	0.000393755	Up-regulated
ZNF277	Pig	1.07766e-08	1.6149	256	46	0.000393831	Up-regulated
GBF1	Pig	1.14196e-08	0.774649	618	274	0.000417328	Up-regulated
RAB3GAP1	Pig	1.14415e-08	1.94763	276	61	0.00041813	Up-regulated
TNPO1	Pig	1.15051e-08	0.730248	559	218	0.000420453	Up-regulated
HNRNPM	Pig	1.21468e-08	0.694902	449	157	0.000443904	Up-regulated
KANSL1	Pig	1.27068e-08	0.798036	717	355	0.000464369	Up-regulated
UOX	Pig	1.29499e-08	1.48981	276	61	0.000473253	Up-regulated
RNF13	Pig	1.30281e-08	1.09472	413	142	0.00047611	Up-regulated
TERF2IP	Pig	1.3032e-08	3.23757	185	15	0.000476254	Up-regulated
SSR4	Pig	1.3045e-08	2.73485	177	0.01	0.000476729	Up-regulated
ZNF644	Pig	1.30502e-08	0.726457	622	279	0.000476918	Up-regulated
NBEA	Pig	1.32434e-08	1.01454	634	0.32	0.000483979	Up-regulated
NEMP2	Pig	1.32856e-08	1.47622	276	56	0.000485522	Up-regulated
TMED5	Pig	1.34632e-08	1.82167	0.26	51	0.000492011	Up-regulated
SCAMP1	Pig	1.35987e-08	1.502	244	41	0.000496965	Up-regulated
ORC3	Pig	1.40741e-08	1.72672	0.28	61	0.00051434	Up-regulated
LIPA	Pig	1.41462e-08	0.770276	0.48	183	0.000516974	Up-regulated
ENSSSCG00000006206	Pig	1.42763e-08	0.95146	327	86	0.000521726	Up-regulated
TGM2	Pig	1.43319e-08	1.75068	303	76	0.000523759	Up-regulated
MTAP	Pig	1.43599e-08	0.73562	213	25	0.000524784	Up-regulated
SCFD1	Pig	1.46976e-08	1.12594	346	96	0.000537124	Up-regulated
PTPN12	Pig	1.49191e-08	0.542337	689	0.32	0.000545218	Up-regulated
PRRG1	Pig	1.49395e-08	2.07078	209	25	0.000545965	Up-regulated
STAG2	Pig	1.5067e-08	0.556899	524	208	0.000550624	Up-regulated
SLC16A3	Pig	1.5247e-08	6.58812	0.15	0	0.000557203	Up-regulated
NHLRC3	Pig	1.53135e-08	0.726779	496	198	0.000559632	Up-regulated
MAPK14	Pig	1.56685e-08	0.630407	398	127	0.000572606	Up-regulated
DYRK1A	Pig	1.57169e-08	0.753735	701	0.34	0.000574373	Up-regulated
NCBP1	Pig	1.62079e-08	2.17857	244	46	0.000592319	Up-regulated
SPARC	Pig	1.65682e-08	1.25286	0.37	117	0.000605483	Up-regulated
CCNYL1	Pig	1.66012e-08	1.72692	252	46	0.000606691	Up-regulated
ENSSSCG00000016737	Pig	1.73755e-08	0.84287	311	81	0.000634988	Up-regulated
LRBA	Pig	1.74237e-08	0.743372	638	284	0.000636747	Up-regulated
RIMS2	Pig	1.76059e-08	4.34694	161	5	0.000643408	Up-regulated
AUH	Pig	1.78254e-08	0.731429	496	193	0.00065143	Up-regulated
MAP4K4	Pig	1.78821e-08	0.645315	756	406	0.000653501	Up-regulated
CREB3L2	Pig	1.79318e-08	0.522126	433	152	0.000655318	Up-regulated
PCNA	Pig	1.79421e-08	1.68606	228	36	0.000655694	Up-regulated
C9orf85	Pig	1.90778e-08	2.5614	185	15	0.000697199	Up-regulated
PABPC1	Pig	1.9298e-08	0.871326	425	147	0.000705245	Up-regulated
LHFPL6	Pig	1.96112e-08	0.641253	0.5	193	0.000716692	Up-regulated
PJA2	Pig	1.97877e-08	0.682116	528	203	0.000723141	Up-regulated
HMGN3	Pig	2.03158e-08	1.84009	228	36	0.000742443	Up-regulated
EXOC4	Pig	2.05063e-08	0.576231	902	629	0.000749404	Up-regulated
LCOR	Pig	2.06872e-08	0.63613	0.65	305	0.000756014	Up-regulated
MYL12A	Pig	2.08626e-08	0.567277	0.48	178	0.000762424	Up-regulated
RNGTT	Pig	2.16542e-08	0.788364	421	142	0.000791352	Up-regulated
SHPRH	Pig	2.2077e-08	1.71466	248	46	0.000806802	Up-regulated
POLA1	Pig	2.21394e-08	1.36546	311	81	0.000809084	Up-regulated
ENSSSCG00000001398	Pig	2.28006e-08	1.85221	307	86	0.000833249	Up-regulated
RHBDD1	Pig	2.29726e-08	0.566779	362	112	0.000839532	Up-regulated
NDRG1	Pig	2.32499e-08	1.58541	256	51	0.000849669	Up-regulated
SMAD1	Pig	2.34516e-08	0.939337	378	112	0.000857039	Up-regulated
ILF3	Pig	2.40121e-08	1.52316	217	0.03	0.000877522	Up-regulated
PRKDC	Pig	2.40441e-08	1.24348	335	96	0.000878693	Up-regulated
HSPA4	Pig	2.40698e-08	1.09434	362	112	0.000879632	Up-regulated
SOCS1	Pig	2.44101e-08	6.78646	146	0	0.000892069	Up-regulated
SINHCAF	Pig	2.47928e-08	1.7077	244	46	0.000906054	Up-regulated
SIPA1L1	Pig	2.49471e-08	0.623939	0.61	274	0.000911691	Up-regulated
STIM2	Pig	2.54849e-08	1.25293	0.35	112	0.000931346	Up-regulated
ENSSSCG00000004830	Pig	2.61788e-08	1.49816	276	66	0.000956705	Up-regulated
MGAT5	Pig	2.62318e-08	0.757003	846	518	0.000958641	Up-regulated
ZNHIT6	Pig	2.64216e-08	1.19546	378	127	0.000965576	Up-regulated
PSMB1	Pig	2.71269e-08	3.67179	169	0.01	0.000991352	Up-regulated
SNAPC1	Pig	2.71749e-08	1.02398	295	71	0.000993107	Up-regulated
CALR	Pig	2.74144e-08	1.74764	256	56	0.00100186	Up-regulated
PDK1	Pig	2.7477e-08	3.40721	197	25	0.00100415	Up-regulated
CTSB	Pig	2.81657e-08	0.665355	319	86	0.00102931	Up-regulated
SMYD3	Pig	2.84482e-08	0.527124	673	365	0.00103964	Up-regulated
CITED2	Pig	2.87889e-08	2.65158	193	0.02	0.00105209	Up-regulated
SLC39A11	Pig	2.87986e-08	0.527621	484	188	0.00105245	Up-regulated
ALCAM	Pig	2.88298e-08	0.660477	591	284	0.00105358	Up-regulated
TRAPPC8	Pig	2.8941e-08	0.794947	382	117	0.00105765	Up-regulated
RPL6	Pig	3.00014e-08	0.850719	307	76	0.0010964	Up-regulated
LEO1	Pig	3.06009e-08	0.91926	323	86	0.00111831	Up-regulated
CGAS	Pig	3.06367e-08	1.07388	0.28	61	0.00111962	Up-regulated
ATP6V0A1	Pig	3.16988e-08	1.20076	323	91	0.00115843	Up-regulated
USP15	Pig	3.20834e-08	0.638337	724	386	0.00117249	Up-regulated
CAVIN2	Pig	3.2928e-08	0.810196	421	152	0.00120336	Up-regulated
DNAJA1	Pig	3.31515e-08	1.69903	217	0.03	0.00121152	Up-regulated
SPCS2	Pig	3.33299e-08	2.54166	209	0.03	0.00121804	Up-regulated
URI1	Pig	3.34559e-08	0.826956	492	193	0.00122264	Up-regulated
HMG20A	Pig	3.40508e-08	1.65398	0.28	66	0.00124439	Up-regulated
FBXO25	Pig	3.40704e-08	2.26829	169	0.01	0.0012451	Up-regulated
FABP5	Pig	3.40838e-08	0.847835	665	0.36	0.00124559	Up-regulated
ZNF148	Pig	3.42717e-08	0.69112	543	223	0.00125246	Up-regulated
ASPH	Pig	3.42789e-08	1.56025	287	71	0.00125272	Up-regulated
PTPA	Pig	3.44867e-08	2.82525	181	15	0.00126032	Up-regulated
ANKIB1	Pig	3.48197e-08	0.617519	508	203	0.00127249	Up-regulated
NMI	Pig	3.48282e-08	0.542884	402	132	0.0012728	Up-regulated
TTC37	Pig	3.50151e-08	0.833782	339	96	0.00127963	Up-regulated
AAK1	Pig	3.51332e-08	0.641292	531	223	0.00128394	Up-regulated
TLE1	Pig	3.51729e-08	1.05159	386	132	0.00128539	Up-regulated
DERA	Pig	3.53846e-08	1.38179	252	51	0.00129313	Up-regulated
ARRDC4	Pig	3.58043e-08	1.98523	0.22	36	0.00130847	Up-regulated
PTPN4	Pig	3.60931e-08	1.44464	303	81	0.00131902	Up-regulated
HDGFL3	Pig	3.63817e-08	0.807121	594	264	0.00132957	Up-regulated
MCCC1	Pig	3.70869e-08	0.903758	469	178	0.00135534	Up-regulated
BMT2	Pig	3.71369e-08	0.839076	315	86	0.00135717	Up-regulated
SNAI2	Pig	3.76519e-08	3.88631	165	0.01	0.00137599	Up-regulated
CD63	Pig	3.82664e-08	1.35181	303	81	0.00139844	Up-regulated
ENSSSCG00000039544	Pig	3.89126e-08	0.580873	559	234	0.00142206	Up-regulated
MFRP	Pig	3.90136e-08	6.51516	142	0	0.00142575	Up-regulated
CFDP1	Pig	3.95717e-08	0.635077	701	335	0.00144615	Up-regulated
SLC25A28	Pig	4.00418e-08	0.571634	394	127	0.00146333	Up-regulated
FAF1	Pig	4.02173e-08	0.50986	638	284	0.00146974	Up-regulated
BCL2L13	Pig	4.0718e-08	1.19246	358	112	0.00148804	Up-regulated
TBC1D19	Pig	4.10005e-08	1.93873	0.24	46	0.00149836	Up-regulated
TMEM8B	Pig	4.12276e-08	0.864107	409	142	0.00150666	Up-regulated
ENSSSCG00000026960	Pig	4.16704e-08	0.621055	547	223	0.00152284	Up-regulated
THUMPD2	Pig	4.36707e-08	1.3903	244	46	0.00159595	Up-regulated
ATP5MC1	Pig	4.37769e-08	4.50145	154	5	0.00159983	Up-regulated
MFSD6	Pig	4.38856e-08	1.09458	299	76	0.0016038	Up-regulated
MDFIC	Pig	4.40421e-08	1.01296	303	76	0.00160952	Up-regulated
PSMB7	Pig	4.55089e-08	1.39369	295	76	0.00166312	Up-regulated
MERTK	Pig	4.5746e-08	0.647001	445	173	0.00167179	Up-regulated
ALG5	Pig	4.64572e-08	1.91036	201	25	0.00169778	Up-regulated
RPLP2	Pig	4.65458e-08	0.582247	307	81	0.00170102	Up-regulated
TMEM30A	Pig	4.73049e-08	1.04962	323	91	0.00172876	Up-regulated
ATP2A2	Pig	4.87012e-08	1.21905	323	96	0.00177978	Up-regulated
PARP3	Pig	4.92209e-08	2.34459	189	0.02	0.00179878	Up-regulated
RUSC2	Pig	4.97071e-08	0.895923	445	168	0.00181654	Up-regulated
ARID5B	Pig	5.00694e-08	1.56582	299	81	0.00182979	Up-regulated
GCC2	Pig	5.05067e-08	0.977756	362	117	0.00184577	Up-regulated
SMIM14	Pig	5.0512e-08	1.35943	0.28	66	0.00184596	Up-regulated
ENSSSCG00000016186	Pig	5.0697e-08	2.36287	189	0.02	0.00185272	Up-regulated
TMEM161B	Pig	5.15322e-08	0.913149	323	86	0.00188324	Up-regulated
CHMP5	Pig	5.379e-08	1.04931	232	41	0.00196576	Up-regulated
GLB1	Pig	5.59036e-08	2.95294	185	0.02	0.002043	Up-regulated
FGGY	Pig	5.67562e-08	0.569048	425	152	0.00207415	Up-regulated
SRSF3	Pig	6.07286e-08	0.912327	417	152	0.00221933	Up-regulated
YLPM1	Pig	6.10017e-08	1.21843	295	76	0.00222931	Up-regulated
KDM4C	Pig	6.18645e-08	0.688468	602	274	0.00226084	Up-regulated
TIGAR	Pig	6.22493e-08	6.59178	138	0	0.0022749	Up-regulated
COX7A2	Pig	6.3585e-08	2.85213	193	25	0.00232371	Up-regulated
RANBP9	Pig	6.58493e-08	0.845855	409	142	0.00240646	Up-regulated
DDX21	Pig	6.65513e-08	0.609947	346	102	0.00243212	Up-regulated
RAB11A	Pig	6.74759e-08	0.807141	264	56	0.00246591	Up-regulated
SP110	Pig	6.77586e-08	0.837579	315	86	0.00247624	Up-regulated
CEBPB	Pig	6.87762e-08	2.08576	185	0.02	0.00251342	Up-regulated
BCLAF1	Pig	6.9213e-08	0.682619	484	193	0.00252939	Up-regulated
ODR4	Pig	6.93103e-08	1.16146	315	91	0.00253294	Up-regulated
MTDH	Pig	7.14656e-08	0.792503	543	239	0.00261171	Up-regulated
KCTD3	Pig	7.18344e-08	1.08607	409	147	0.00262519	Up-regulated
CTSD	Pig	7.32865e-08	3.89721	0.15	5	0.00267825	Up-regulated
RPS18	Pig	7.33126e-08	0.772942	268	61	0.00267921	Up-regulated
LPGAT1	Pig	7.37267e-08	0.96191	315	91	0.00269434	Up-regulated
NGLY1	Pig	7.51781e-08	1.08744	445	173	0.00274738	Up-regulated
ENSSSCG00000014267	Pig	7.76954e-08	0.848593	484	203	0.00283938	Up-regulated
MIER1	Pig	7.8393e-08	0.673863	547	228	0.00286487	Up-regulated
F11R	Pig	7.86669e-08	0.580484	276	66	0.00287488	Up-regulated
ATF6	Pig	7.97513e-08	0.729028	512	213	0.00291451	Up-regulated
RNF111	Pig	8.00391e-08	0.653397	492	188	0.00292503	Up-regulated
SPEN	Pig	8.00697e-08	0.663562	531	223	0.00292615	Up-regulated
ZMYND8	Pig	8.11073e-08	0.526756	504	198	0.00296407	Up-regulated
ENSSSCG00000031912	Pig	8.18889e-08	2.0489	232	46	0.00299263	Up-regulated
ENSSSCG00000013366	Pig	8.19479e-08	1.80432	213	36	0.00299478	Up-regulated
ZNF800	Pig	8.35276e-08	0.578926	268	61	0.00305252	Up-regulated
ENSSSCG00000002259	Pig	8.35885e-08	0.804825	606	0.31	0.00305474	Up-regulated
DENND6A	Pig	8.62496e-08	0.764803	433	157	0.00315199	Up-regulated
BTRC	Pig	8.72355e-08	0.868246	374	122	0.00318802	Up-regulated
PPHLN1	Pig	8.7861e-08	1.25977	323	96	0.00321088	Up-regulated
OSBPL10	Pig	9.00818e-08	1.55561	299	86	0.00329204	Up-regulated
MBD5	Pig	9.4023e-08	0.645634	665	365	0.00343607	Up-regulated
SEPTIN2	Pig	9.44489e-08	1.48923	236	46	0.00345164	Up-regulated
HRH1	Pig	9.59794e-08	2.5598	181	0.02	0.00350757	Up-regulated
NEK7	Pig	9.61409e-08	0.651924	638	0.32	0.00351347	Up-regulated
IP6K1	Pig	9.70853e-08	0.860063	398	137	0.00354798	Up-regulated
TMEM168	Pig	1.02292e-07	1.55157	0.26	61	0.00373825	Up-regulated
RMDN1	Pig	1.02871e-07	4.79778	146	5	0.00375943	Up-regulated
PITPNB	Pig	1.03251e-07	0.795228	425	157	0.00377332	Up-regulated
GLG1	Pig	1.03483e-07	0.676323	571	249	0.0037818	Up-regulated
NR6A1	Pig	1.04552e-07	0.967387	437	173	0.00382084	Up-regulated
ITGB1	Pig	1.0655e-07	0.51324	657	299	0.00389386	Up-regulated
MTHFD2L	Pig	1.06873e-07	1.58553	252	56	0.00390567	Up-regulated
TMEM59	Pig	1.08866e-07	1.12958	323	96	0.0039785	Up-regulated
TES	Pig	1.12707e-07	4.41413	146	5	0.00411887	Up-regulated
HIPK3	Pig	1.17509e-07	0.787557	0.48	193	0.00429438	Up-regulated
ZNF326	Pig	1.18177e-07	0.740229	516	228	0.00431877	Up-regulated
UHMK1	Pig	1.21252e-07	3.20442	157	0.01	0.00443114	Up-regulated
TPST1	Pig	1.25675e-07	1.45759	0.22	41	0.00459278	Up-regulated
FAM160B1	Pig	1.29788e-07	0.897049	366	122	0.00474309	Up-regulated
RIOK3	Pig	1.34184e-07	0.749763	303	81	0.00490377	Up-regulated
ENSSSCG00000039894	Pig	1.34522e-07	0.523748	524	223	0.00491611	Up-regulated
MOB1A	Pig	1.36907e-07	1.85256	228	46	0.00500327	Up-regulated
MAN1A1	Pig	1.38092e-07	1.21883	272	71	0.00504656	Up-regulated
ENSSSCG00000041571	Pig	1.38643e-07	2.46793	157	0.01	0.0050667	Up-regulated
SMAD5	Pig	1.47068e-07	0.836826	421	152	0.0053746	Up-regulated
BIRC3	Pig	1.48113e-07	0.979369	492	228	0.0054128	Up-regulated
ITM2B	Pig	1.48172e-07	0.553643	492	198	0.00541496	Up-regulated
SHOC2	Pig	1.48228e-07	0.64927	476	183	0.00541699	Up-regulated
RPS29	Pig	1.48381e-07	0.552309	409	147	0.00542257	Up-regulated
SKAP2	Pig	1.52961e-07	0.536746	0.24	51	0.00558997	Up-regulated
MED13	Pig	1.54197e-07	0.731797	567	254	0.00563515	Up-regulated
AHR	Pig	1.54684e-07	1.10786	295	81	0.00565291	Up-regulated
SPRY1	Pig	1.55319e-07	0.664048	673	376	0.00567612	Up-regulated
MTFR2	Pig	1.57497e-07	0.795532	283	76	0.00575573	Up-regulated
DGKI	Pig	1.57703e-07	6.68393	0.13	0	0.00576327	Up-regulated
CAPN7	Pig	1.60585e-07	1.95967	232	51	0.00586856	Up-regulated
OSBPL9	Pig	1.61484e-07	0.736822	449	178	0.00590142	Up-regulated
PIAS2	Pig	1.64293e-07	1.32051	323	102	0.00600407	Up-regulated
METAP1	Pig	1.64549e-07	2.15678	197	0.03	0.00601343	Up-regulated
ABHD6	Pig	1.65438e-07	2.45724	177	0.02	0.00604592	Up-regulated
LOXL2	Pig	1.6716e-07	1.97223	209	36	0.00610886	Up-regulated
TBC1D15	Pig	1.67568e-07	0.64613	339	102	0.00612377	Up-regulated
POLR1F	Pig	1.70095e-07	0.766244	346	112	0.00621612	Up-regulated
JKAMP	Pig	1.70253e-07	1.82065	165	15	0.0062219	Up-regulated
NEDD4	Pig	1.70336e-07	0.578203	406	157	0.00622494	Up-regulated
INO80	Pig	1.70557e-07	0.537998	559	239	0.00623301	Up-regulated
SNX24	Pig	1.71062e-07	0.684765	394	147	0.00625145	Up-regulated
VPS37A	Pig	1.71547e-07	2.78125	165	15	0.0062692	Up-regulated
HCLS1	Pig	1.76575e-07	1.46249	256	61	0.00645295	Up-regulated
ENSSSCG00000027907	Pig	1.7795e-07	2.75327	177	0.02	0.00650319	Up-regulated
ERCC6	Pig	1.7915e-07	1.74839	189	25	0.00654704	Up-regulated
ANGPTL4	Pig	1.82251e-07	3.18406	165	15	0.00666037	Up-regulated
MOSPD2	Pig	1.83497e-07	0.664851	331	102	0.0067059	Up-regulated
GCFC2	Pig	1.83883e-07	1.15894	264	66	0.00671999	Up-regulated
CDA	Pig	1.86429e-07	3.94427	142	5	0.00681303	Up-regulated
AP5M1	Pig	1.87786e-07	1.01643	0.24	51	0.00686264	Up-regulated
PFN1	Pig	1.87842e-07	1.15605	209	36	0.00686469	Up-regulated
ACACA	Pig	1.90635e-07	0.878171	425	157	0.00696674	Up-regulated
DIPK2A	Pig	1.92452e-07	3.31348	154	0.01	0.00703318	Up-regulated
N4BP1	Pig	1.93251e-07	0.601424	646	0.31	0.00706236	Up-regulated
ENSSSCG00000004387	Pig	1.95499e-07	0.617641	0.74	421	0.0071445	Up-regulated
SENP6	Pig	1.96755e-07	0.680323	626	299	0.00719042	Up-regulated
WAC	Pig	1.98161e-07	0.657967	634	305	0.0072418	Up-regulated
PCNX1	Pig	2.0348e-07	0.775189	512	228	0.00743618	Up-regulated
TMED9	Pig	2.07182e-07	2.39607	165	15	0.00757147	Up-regulated
PRPF40A	Pig	2.12818e-07	0.636555	433	168	0.00777744	Up-regulated
BAG3	Pig	2.14915e-07	1.91749	177	0.02	0.00785407	Up-regulated
GYG1	Pig	2.16195e-07	2.28678	185	25	0.00790084	Up-regulated
DDHD2	Pig	2.16467e-07	0.618168	0.24	51	0.00791079	Up-regulated
ERO1A	Pig	2.19044e-07	1.35487	0.37	132	0.00800496	Up-regulated
CCL14	Pig	2.26732e-07	2.13063	165	15	0.00828593	Up-regulated
CTNNBL1	Pig	2.26992e-07	0.957048	339	107	0.00829543	Up-regulated
YAP1	Pig	2.28221e-07	1.40268	339	122	0.00834035	Up-regulated
ASXL1	Pig	2.3179e-07	0.748701	339	107	0.00847078	Up-regulated
UBAP2	Pig	2.32999e-07	0.807998	0.5	213	0.00851494	Up-regulated
1,00 STN	Pig	2.33292e-07	1.53476	197	0.03	0.00852565	Up-regulated
GRM5	Pig	2.35296e-07	3.45168	161	15	0.00859888	Up-regulated
RBM12B	Pig	2.45043e-07	1.108	287	81	0.00895511	Up-regulated
DNAJB1	Pig	2.45796e-07	2.85494	173	0.02	0.00898261	Up-regulated
PPM1L	Pig	2.46963e-07	2.72298	209	41	0.00902527	Up-regulated
CTSV	Pig	2.50414e-07	6.54201	126	0	0.00915138	Up-regulated
KRT10	Pig	2.50414e-07	6.4392	126	0	0.00915138	Up-regulated
MICU1	Pig	2.51516e-07	1.10102	327	102	0.00919166	Up-regulated
SLC25A26	Pig	2.53979e-07	0.747725	236	51	0.00928166	Up-regulated
SPPL3	Pig	2.56484e-07	0.506882	602	274	0.00937322	Up-regulated
LAPTM5	Pig	2.56507e-07	3.42276	0.15	0.01	0.00937404	Up-regulated
MSH4	Pig	2.5973e-07	2.46577	193	0.03	0.00949184	Up-regulated
DR1	Pig	2.63183e-07	2.17907	185	25	0.00961802	Up-regulated
RHEB	Pig	2.66486e-07	1.23816	287	81	0.00973872	Up-regulated
1,00 PGK	Pig	2.66516e-07	1.76629	205	36	0.00973983	Up-regulated
PRELID2	Pig	2.73481e-07	0.632961	248	56	0.00999436	Up-regulated
PSMD1	Pig	2.73845e-07	0.816446	449	188	0.0100077	Up-regulated
ENSSSCG00000007203	Pig	2.7703e-07	0.93928	386	142	0.0101241	Up-regulated
SLC30A6	Pig	2.778e-07	2.70272	161	15	0.0101522	Up-regulated
RPS23	Pig	2.80279e-07	1.55998	185	25	0.0102428	Up-regulated
USP47	Pig	2.80425e-07	0.761271	551	264	0.0102481	Up-regulated
PLS3	Pig	2.87926e-07	0.605728	673	365	0.0105223	Up-regulated
IPO7	Pig	2.91868e-07	0.745806	0.35	117	0.0106663	Up-regulated
TDRP	Pig	2.9298e-07	1.07899	287	81	0.010707	Up-regulated
TAF4B	Pig	2.96804e-07	1.39871	217	41	0.0108467	Up-regulated
C5orf24	Pig	3.00319e-07	1.15582	0.28	76	0.0109752	Up-regulated
PDS5A	Pig	3.02451e-07	0.667925	618	284	0.0110531	Up-regulated
ZNF827	Pig	3.06437e-07	0.765445	457	188	0.0111987	Up-regulated
LCORL	Pig	3.09278e-07	0.66394	406	142	0.0113026	Up-regulated
ENSSSCG00000025224	Pig	3.10887e-07	1.08503	232	51	0.0113614	Up-regulated
RAD52	Pig	3.12022e-07	1.79419	228	51	0.0114029	Up-regulated
WDR83OS	Pig	3.16908e-07	0.962	272	71	0.0115814	Up-regulated
ENSSSCG00000041649	Pig	3.20398e-07	2.27688	161	15	0.0117089	Up-regulated
RNF149	Pig	3.22438e-07	0.810155	484	203	0.0117835	Up-regulated
ACBD6	Pig	3.25403e-07	0.537185	441	178	0.0118919	Up-regulated
PPIB	Pig	3.27361e-07	1.61103	193	0.03	0.0119634	Up-regulated
BTG1	Pig	3.37422e-07	1.08649	272	71	0.0123311	Up-regulated
KIAA0586	Pig	3.48846e-07	0.722937	244	56	0.0127486	Up-regulated
BTD	Pig	3.50282e-07	3.29256	157	15	0.012801	Up-regulated
CDKAL1	Pig	3.7008e-07	0.59248	787	477	0.0135246	Up-regulated
TNFRSF21	Pig	3.7096e-07	0.663938	354	117	0.0135567	Up-regulated
ENSSSCG00000013992	Pig	3.73636e-07	0.623906	406	152	0.0136545	Up-regulated
ZDHHC23	Pig	3.75377e-07	1.28266	181	25	0.0137182	Up-regulated
CCNT1	Pig	3.86028e-07	0.898557	354	127	0.0141074	Up-regulated
MXD1	Pig	3.93068e-07	4.67982	134	5	0.0143647	Up-regulated
NIPBL	Pig	3.93438e-07	0.549749	764	462	0.0143782	Up-regulated
CDH13	Pig	3.9366e-07	0.594399	819	528	0.0143863	Up-regulated
STC1	Pig	3.97421e-07	0.525707	472	198	0.0145238	Up-regulated
COPB1	Pig	3.97557e-07	1.05105	252	61	0.0145287	Up-regulated
NHSL2	Pig	4.04446e-07	0.56434	488	208	0.0147805	Up-regulated
NFE2L2	Pig	4.10041e-07	0.722479	413	162	0.014985	Up-regulated
PSMA5	Pig	4.11286e-07	1.56089	201	36	0.0150305	Up-regulated
GOLIM4	Pig	4.17493e-07	1.03977	0.26	66	0.0152573	Up-regulated
ENSSSCG00000014672	Pig	4.22301e-07	0.595569	339	112	0.015433	Up-regulated
TSPAN15	Pig	4.23069e-07	1.43233	193	0.03	0.015461	Up-regulated
PKIG	Pig	4.23788e-07	1.80192	0.26	71	0.0154873	Up-regulated
VRK2	Pig	4.29586e-07	0.585851	343	117	0.0156992	Up-regulated
ERP44	Pig	4.50176e-07	0.571222	398	147	0.0164517	Up-regulated
MAPRE2	Pig	4.51718e-07	1.11012	354	127	0.016508	Up-regulated
HADHB	Pig	4.52193e-07	2.85319	157	15	0.0165254	Up-regulated
GABARAPL1	Pig	4.54177e-07	1.43182	339	122	0.0165979	Up-regulated
COX5B	Pig	4.62389e-07	1.91155	181	25	0.016898	Up-regulated
ENSSSCG00000008222	Pig	4.66621e-07	0.92798	303	91	0.0170527	Up-regulated
TM2D1	Pig	4.68835e-07	1.97149	181	25	0.0171336	Up-regulated
ARFIP1	Pig	4.68886e-07	1.01649	366	132	0.0171354	Up-regulated
SMARCAD1	Pig	4.73596e-07	0.913677	287	81	0.0173076	Up-regulated
GBE1	Pig	4.78071e-07	1.03839	433	178	0.0174711	Up-regulated
ZNF22	Pig	4.78843e-07	3.71123	134	5	0.0174993	Up-regulated
ENSSSCG00000014600	Pig	4.80034e-07	0.656884	299	91	0.0175429	Up-regulated
RPL24	Pig	4.80503e-07	0.805499	307	91	0.01756	Up-regulated
CCN2	Pig	4.82767e-07	1.66303	0.24	61	0.0176427	Up-regulated
HNRNPA3	Pig	4.92007e-07	0.752126	374	132	0.0179804	Up-regulated
JADE1	Pig	4.92021e-07	1.34021	0.24	56	0.0179809	Up-regulated
HNRNPH3	Pig	4.9215e-07	0.510592	484	193	0.0179856	Up-regulated
MINDY3	Pig	4.99218e-07	1.48809	236	56	0.0182439	Up-regulated
ETV7	Pig	5.06764e-07	1.25519	0.22	46	0.0185197	Up-regulated
ENSSSCG00000012961	Pig	5.07218e-07	2.75353	146	0.01	0.0185363	Up-regulated
RRBP1	Pig	5.07654e-07	0.860816	335	112	0.0185522	Up-regulated
RPS5	Pig	5.17307e-07	0.949718	248	61	0.018905	Up-regulated
BABAM2	Pig	5.18312e-07	0.572408	638	0.34	0.0189417	Up-regulated
CLIC2	Pig	5.32224e-07	2.93186	165	0.02	0.0194501	Up-regulated
ENSSSCG00000022176	Pig	5.35745e-07	0.510842	268	71	0.0195788	Up-regulated
INTS9	Pig	5.41756e-07	1.15959	232	51	0.0197985	Up-regulated
GOLGA4	Pig	5.44858e-07	1.3168	256	66	0.0199118	Up-regulated
ABCD3	Pig	5.45091e-07	1.37136	272	76	0.0199204	Up-regulated
SLC25A3	Pig	5.52552e-07	2.30978	201	41	0.020193	Up-regulated
SNX4	Pig	5.61146e-07	1.09807	295	91	0.0205071	Up-regulated
RAB9A	Pig	5.66297e-07	1.15296	248	61	0.0206953	Up-regulated
RSU1	Pig	5.66961e-07	0.573184	0.52	228	0.0207196	Up-regulated
ACSL1	Pig	5.74744e-07	3.88532	142	0.01	0.021004	Up-regulated
SNX3	Pig	5.7528e-07	0.981296	264	71	0.0210236	Up-regulated
CD36	Pig	5.87083e-07	1.08601	602	401	0.021455	Up-regulated
MYLIP	Pig	5.93005e-07	1.11639	331	112	0.0216714	Up-regulated
ENSSSCG00000024974	Pig	5.96777e-07	0.526559	0.35	117	0.0218092	Up-regulated
SYPL1	Pig	6.02619e-07	0.964953	362	127	0.0220227	Up-regulated
THRAP3	Pig	6.11577e-07	0.565226	488	208	0.0223501	Up-regulated
RAF1	Pig	6.15194e-07	0.733521	374	137	0.0224823	Up-regulated
ENY2	Pig	6.28468e-07	6.06454	118	0	0.0229674	Up-regulated
ENSSSCG00000031838	Pig	6.32822e-07	0.786828	343	117	0.0231265	Up-regulated
LRCH3	Pig	6.36258e-07	0.640971	591	274	0.023252	Up-regulated
S100A10	Pig	6.37639e-07	2.59449	185	0.03	0.0233025	Up-regulated
SENP7	Pig	6.38233e-07	0.755853	358	127	0.0233242	Up-regulated
NAMPT	Pig	6.40889e-07	0.536826	421	162	0.0234213	Up-regulated
FANCB	Pig	6.4171e-07	1.5525	189	0.03	0.0234513	Up-regulated
ANKMY2	Pig	6.46277e-07	2.15127	185	0.03	0.0236182	Up-regulated
CCN1	Pig	6.51388e-07	3.9371	142	0.01	0.023805	Up-regulated
PTGES3	Pig	6.55663e-07	0.75373	382	142	0.0239612	Up-regulated
ARPC5	Pig	6.59059e-07	0.814537	295	86	0.0240853	Up-regulated
UFM1	Pig	6.60728e-07	0.690172	299	91	0.0241463	Up-regulated
SHFL	Pig	6.69081e-07	0.692458	197	36	0.0244516	Up-regulated
TNIP1	Pig	6.74569e-07	1.23542	252	66	0.0246521	Up-regulated
ENSSSCG00000038260	Pig	6.82595e-07	3.5782	142	0.01	0.0249454	Up-regulated
RNF19A	Pig	6.98166e-07	0.579485	488	203	0.0255145	Up-regulated
NARS1	Pig	6.98716e-07	0.847217	0.22	46	0.0255346	Up-regulated
SPPL2A	Pig	6.99201e-07	0.726307	366	132	0.0255523	Up-regulated
ENSSSCG00000006231	Pig	6.9937e-07	0.649189	0.61	0.32	0.0255585	Up-regulated
UBR3	Pig	7.17148e-07	0.521253	709	411	0.0262082	Up-regulated
SREK1IP1	Pig	7.17148e-07	0.962749	311	102	0.0262082	Up-regulated
ENSSSCG00000000703	Pig	7.1994e-07	4.19103	0.13	5	0.0263102	Up-regulated
ENSSSCG00000013391	Pig	7.30568e-07	1.68005	205	41	0.0266986	Up-regulated
IPO5	Pig	7.3783e-07	3.76616	0.13	5	0.026964	Up-regulated
NMD3	Pig	7.47703e-07	1.1774	252	66	0.0273248	Up-regulated
ENSSSCG00000009138	Pig	7.56146e-07	3.7327	0.13	5	0.0276334	Up-regulated
UBR1	Pig	7.57202e-07	0.582705	528	244	0.027672	Up-regulated
OPA1	Pig	7.6705e-07	0.994618	323	107	0.0280318	Up-regulated
PSMD7	Pig	7.68897e-07	1.10818	209	41	0.0280993	Up-regulated
MIB1	Pig	7.76728e-07	0.720492	453	193	0.0283855	Up-regulated
EDEM3	Pig	7.82022e-07	1.41267	0.26	71	0.028579	Up-regulated
1,00 PES	Pig	7.94759e-07	2.04729	165	0.02	0.0290445	Up-regulated
MYORG	Pig	8.13725e-07	1.10014	346	127	0.0297376	Up-regulated
TAB2	Pig	8.20032e-07	0.581793	311	96	0.0299681	Up-regulated
ARMC8	Pig	8.35638e-07	0.959209	291	86	0.0305384	Up-regulated
RAB5A	Pig	8.77841e-07	1.17981	283	86	0.0320807	Up-regulated
TEK	Pig	8.78895e-07	0.946944	539	269	0.0321192	Up-regulated
RSBN1L	Pig	8.80956e-07	1.03887	331	122	0.0321945	Up-regulated
PPME1	Pig	8.82835e-07	1.47865	272	81	0.0322632	Up-regulated
NAA20	Pig	9.27255e-07	1.15896	276	81	0.0338865	Up-regulated
SRP14	Pig	9.45354e-07	1.6945	201	41	0.034548	Up-regulated
COX8A	Pig	9.54724e-07	2.31858	161	0.02	0.0348904	Up-regulated
TRAF3IP2	Pig	9.60033e-07	0.619231	398	152	0.0350844	Up-regulated
PWWP2A	Pig	9.8233e-07	2.58278	161	0.02	0.0358992	Up-regulated
SMIM15	Pig	9.85066e-07	2.19876	197	41	0.0359993	Up-regulated
LRPPRC	Pig	9.86527e-07	0.977801	311	102	0.0360526	Up-regulated
E2F3	Pig	9.91459e-07	1.22218	0.24	61	0.0362329	Up-regulated
ENSSSCG00000022842	Pig	9.93399e-07	5.95135	114	0	0.0363038	Up-regulated
LAP3	Pig	1.01408e-06	1.34619	232	56	0.0370597	Up-regulated
UBE2H	Pig	1.01633e-06	0.588439	681	0.36	0.0371418	Up-regulated
CABLES1	Pig	1.01936e-06	1.83465	0.28	91	0.0372524	Up-regulated
CDK8	Pig	1.02581e-06	0.805926	346	122	0.0374882	Up-regulated
MB21D2	Pig	1.04975e-06	1.93574	197	41	0.0383631	Up-regulated
CBLB	Pig	1.08475e-06	0.88442	539	269	0.0396421	Up-regulated
DEK	Pig	1.09269e-06	0.601159	437	173	0.0399322	Up-regulated
TLR3	Pig	1.10224e-06	1.50172	173	25	0.0402813	Up-regulated
ENSSSCG00000023788	Pig	1.10998e-06	1.46115	213	46	0.0405644	Up-regulated
ARL6IP6	Pig	1.12383e-06	0.96054	0.28	81	0.0410703	Up-regulated
CLCN3	Pig	1.1256e-06	1.92647	181	0.03	0.0411352	Up-regulated
PPM1K	Pig	1.1345e-06	1.50869	193	36	0.0414601	Up-regulated
SETDB2	Pig	1.14049e-06	1.45256	173	25	0.0416792	Up-regulated
ENSSSCG00000034802	Pig	1.16337e-06	3.90579	126	5	0.0425152	Up-regulated
OGFOD1	Pig	1.17223e-06	1.9532	189	36	0.0428392	Up-regulated
CAPNS1	Pig	1.17274e-06	1.39709	213	46	0.0428579	Up-regulated
USP30	Pig	1.17274e-06	1.14753	213	46	0.0428579	Up-regulated
FUT8	Pig	1.1777e-06	0.554332	516	228	0.043039	Up-regulated
ATP6V1A	Pig	1.18248e-06	3.52348	126	5	0.0432139	Up-regulated
BRI3	Pig	1.18544e-06	3.21732	138	0.01	0.0433219	Up-regulated
OR6N2	Pig	1.19463e-06	1.07081	138	0.01	0.0436578	Up-regulated
ENSSSCG00000004572	Pig	1.2019e-06	2.91485	126	5	0.0439236	Up-regulated
ENSSSCG00000049039	Pig	1.20712e-06	2.33095	0.15	15	0.044114	Up-regulated
CCDC186	Pig	1.21112e-06	0.555245	303	96	0.0442603	Up-regulated
SH3BGRL3	Pig	1.21173e-06	3.00359	126	5	0.0442826	Up-regulated
SERF2	Human	1.23409e-06	2.00568	0.15	15	0.0450999	Up-regulated
AVEN	Pig	1.2685e-06	1.59075	256	76	0.0463574	Up-regulated
MYO6	Pig	1.2731e-06	0.704781	634	0.33	0.0465254	Up-regulated
RPL3	Pig	1.27425e-06	1.00147	224	51	0.0465673	Up-regulated
ICA1	Pig	1.27456e-06	0.773761	402	162	0.0465789	Up-regulated
SHQ1	Pig	1.2825e-06	2.12219	169	25	0.0468689	Up-regulated
CNBP	Pig	1.30429e-06	0.985484	327	112	0.0476654	Up-regulated
ZNF146	Pig	1.31493e-06	0.835003	311	102	0.0480542	Up-regulated
SERPINB1	Pig	1.32826e-06	1.35637	0.15	15	0.0485414	Up-regulated
RPL37	Pig	1.34674e-06	0.506667	374	137	0.0492167	Up-regulated
SDAD1	Pig	1.34947e-06	1.14496	217	51	0.0493165	Up-regulated
NR5A2	Pig	1.36574e-06	1.59335	217	51	0.049911	Up-regulated
ABLIM3	Pig	1.67281e-50	-3.05523	728	944	6.11329e-46	Down-regulated
TTN	Pig	2.60463e-43	-7.74607	28	614	9.51862e-39	Down-regulated
ENSSSCG00000005518	Pig	2.31814e-30	-2.17009	614	843	8.47164e-26	Down-regulated
AUTS2	Pig	2.37197e-30	-1.97043	642	873	8.66838e-26	Down-regulated
PDE3A	Pig	2.35087e-28	-4.14392	31	472	8.59124e-24	Down-regulated
MCF2L	Pig	5.98241e-28	-4.27561	0.15	584	2.18627e-23	Down-regulated
DMD	Pig	7.33198e-25	-6.20201	31	411	2.67947e-20	Down-regulated
LNX1	Pig	3.31815e-24	-4.62432	71	467	1.21262e-19	Down-regulated
HMCN1	Pig	6.52955e-24	-3.70321	276	0.64	2.38622e-19	Down-regulated
CD55	Human	7.95334e-24	-4.33331	71	457	2.90655e-19	Down-regulated
ENSSSCG00000011121	Pig	2.97631e-22	-4.16225	83	452	1.08769e-17	Down-regulated
ENSSSCG00000012362	Pig	9.66626e-21	-2.57562	437	701	3.53254e-16	Down-regulated
ARHGAP24	Pig	1.16081e-20	-6.31335	0.02	0.34	4.24218e-16	Down-regulated
EVA1C	Pig	5.78293e-20	-2.97951	307	604	2.11337e-15	Down-regulated
ADGRF5	Pig	1.07638e-19	-1.95153	705	807	3.93363e-15	Down-regulated
PCDH7	Pig	3.52344e-19	-9.59463	0	279	1.28764e-14	Down-regulated
SLC8A1	Pig	4.4551e-19	-3.07115	122	477	1.62812e-14	Down-regulated
BTNL9	Pig	1.2959e-18	-4.16948	55	376	4.73587e-14	Down-regulated
ENSSSCG00000009125	Pig	1.68135e-16	-6.90561	8	259	6.14448e-12	Down-regulated
MCC	Pig	2.87182e-16	-1.38312	0.89	883	1.0495e-11	Down-regulated
RYR2	Pig	4.81689e-16	-8.3339	4	244	1.76033e-11	Down-regulated
PLCB4	Pig	1.16682e-15	-1.12831	925	904	4.26413e-11	Down-regulated
COL3A1	Pig	2.13153e-15	-6.27684	8	244	7.78968e-11	Down-regulated
ENSSSCG00000004207	Pig	5.90306e-15	-9.45576	0	218	2.15728e-10	Down-regulated
TSPAN18	Pig	5.96734e-15	-2.73176	161	452	2.18077e-10	Down-regulated
JCAD	Pig	8.59295e-15	-2.77612	268	533	3.14029e-10	Down-regulated
PRKG1	Pig	2.1864e-14	-4.11973	59	0.33	7.9902e-10	Down-regulated
ASAP2	Pig	6.55019e-14	-1.87868	591	706	2.39377e-09	Down-regulated
ENSSSCG00000023014	Pig	8.23271e-14	-4.2976	47	294	3.00864e-09	Down-regulated
HPCAL1	Pig	8.9342e-14	-3.09861	224	477	3.265e-09	Down-regulated
DLC1	Pig	1.63543e-13	-2.88837	291	523	5.97669e-09	Down-regulated
DOCK1	Pig	2.68038e-13	-1.2565	0.78	792	9.79546e-09	Down-regulated
FLT1	Pig	5.66973e-13	-1.74057	795	787	2.072e-08	Down-regulated
THRB	Pig	6.12756e-13	-2.66799	126	391	2.23932e-08	Down-regulated
AFAP1L1	Pig	1.34538e-12	-2.47206	335	543	4.91669e-08	Down-regulated
ATOH8	Pig	1.40779e-12	-3.88672	59	294	5.14475e-08	Down-regulated
FRYL	Pig	1.60776e-12	-1.34312	776	777	5.87556e-08	Down-regulated
ATP6	Pig	1.99626e-12	-3.96566	67	305	7.29533e-08	Down-regulated
ROBO4	Pig	2.41284e-12	-2.33648	0.48	629	8.81771e-08	Down-regulated
ZNF423	Pig	2.64372e-12	-2.84945	217	457	9.66149e-08	Down-regulated
LPL	Pig	2.98526e-12	-8.25755	0	178	1.09096e-07	Down-regulated
PECAM1	Pig	6.1074e-12	-1.34629	0.87	848	2.23195e-07	Down-regulated
PLXDC2	Pig	6.90875e-12	-1.59545	563	675	2.5248e-07	Down-regulated
PRICKLE2	Pig	7.19994e-12	-3.24526	122	365	2.63122e-07	Down-regulated
CMIP	Pig	8.94922e-12	-1.44025	795	797	3.27049e-07	Down-regulated
ST3GAL1	Pig	2.39193e-11	-2.59882	0.24	467	8.74132e-07	Down-regulated
NCALD	Pig	2.54598e-11	-2.50013	311	523	9.30429e-07	Down-regulated
UST	Pig	3.63915e-11	-5.3906	4	173	1.32993e-06	Down-regulated
PTPRM	Pig	8.19183e-11	-0.668681	984	964	2.9937e-06	Down-regulated
NTF3	Pig	8.36649e-11	-5.29743	24	208	3.05753e-06	Down-regulated
STXBP6	Pig	1.11808e-10	-3.59879	28	218	4.08604e-06	Down-regulated
DAPK1	Pig	1.26386e-10	-2.55317	118	355	4.61877e-06	Down-regulated
SEMA5A	Pig	1.3268e-10	-8.68408	0	152	4.84878e-06	Down-regulated
COX3	Pig	1.3622e-10	-3.16522	193	411	4.97818e-06	Down-regulated
ABCA8	Pig	1.38225e-10	-6.97835	4	162	5.05144e-06	Down-regulated
ABLIM1	Pig	2.10133e-10	-1.47857	657	695	7.6793e-06	Down-regulated
SEL1L3	Pig	2.39011e-10	-2.72449	209	421	8.73464e-06	Down-regulated
PCSK6	Pig	5.78986e-10	-5.39126	0.02	188	2.11591e-05	Down-regulated
MGLL	Pig	7.15773e-10	-2.00024	488	589	2.61579e-05	Down-regulated
ST3GAL2	Pig	1.02972e-09	-2.77753	181	396	3.76312e-05	Down-regulated
FOXN3	Pig	1.047e-09	-1.21998	768	746	3.82627e-05	Down-regulated
ROR1	Pig	1.10007e-09	-4.35285	16	178	4.02021e-05	Down-regulated
CTNNA3	Pig	1.10447e-09	-6.19133	12	168	4.03628e-05	Down-regulated
SF3B1	Pig	1.16036e-09	-1.72013	476	579	4.24053e-05	Down-regulated
SCARB1	Pig	1.22185e-09	-4.33088	59	249	4.46525e-05	Down-regulated
ZBTB16	Pig	1.57405e-09	-0.797871	945	893	5.75237e-05	Down-regulated
ENSSSCG00000009672	Pig	1.82601e-09	-5.11061	16	173	6.67315e-05	Down-regulated
ASS1	Pig	2.09812e-09	-5.77108	12	162	7.6676e-05	Down-regulated
SETBP1	Pig	2.13443e-09	-3.40058	51	239	7.80028e-05	Down-regulated
CD163	Pig	2.94606e-09	-6.35559	4	142	0.000107664	Down-regulated
ENSSSCG00000016810	Pig	3.03221e-09	-4.40899	0.02	178	0.000110812	Down-regulated
SEC14L1	Pig	4.0403e-09	-2.04756	425	558	0.000147653	Down-regulated
ND4	Pig	5.41114e-09	-4.53147	28	188	0.00019775	Down-regulated
HSPG2	Pig	5.63483e-09	-1.38652	598	645	0.000205925	Down-regulated
NDFIP1	Pig	6.24845e-09	-2.0816	433	548	0.00022835	Down-regulated
ZNF704	Pig	7.86942e-09	-3.63099	63	244	0.000287588	Down-regulated
PDE1A	Pig	1.66902e-08	-2.99714	24	178	0.000609942	Down-regulated
EBF2	Pig	1.94169e-08	-4.89482	16	157	0.000709591	Down-regulated
AGAP1	Pig	2.1007e-08	-1.79137	504	589	0.0007677	Down-regulated
CYTH3	Pig	2.25613e-08	-2.86665	0.13	0.32	0.000824502	Down-regulated
ITGA9	Pig	2.59326e-08	-2.09907	295	467	0.000947706	Down-regulated
NTRK2	Pig	2.64186e-08	-4.73205	0.02	162	0.000965468	Down-regulated
ENSSSCG00000010212	Pig	3.25456e-08	-6.57263	16	152	0.00118938	Down-regulated
ABCA6	Pig	3.34537e-08	-2.79729	12	147	0.00122256	Down-regulated
SPON1	Pig	4.24689e-08	-3.20177	47	208	0.00155203	Down-regulated
TP53I11	Pig	4.75256e-08	-3.82033	16	152	0.00173682	Down-regulated
CDH2	Pig	4.99526e-08	-8.3567	0	112	0.00182552	Down-regulated
MEOX1	Pig	4.99526e-08	-8.16564	0	112	0.00182552	Down-regulated
ITIH5	Pig	5.71189e-08	-4.94523	8	132	0.00208741	Down-regulated
LRMDA	Pig	5.83809e-08	-0.863139	929	878	0.00213353	Down-regulated
ABCA9	Pig	6.12651e-08	-5.25116	4	122	0.00223893	Down-regulated
ADGRD1	Pig	7.11213e-08	-3.71939	0.02	157	0.00259913	Down-regulated
ADAMTSL3	Pig	7.27022e-08	-4.05372	31	178	0.0026569	Down-regulated
GAB2	Pig	8.18268e-08	-2.62643	0.15	325	0.00299036	Down-regulated
CCDC141	Pig	1.12007e-07	-6.33495	4	117	0.00409329	Down-regulated
UACA	Pig	1.14813e-07	-1.67374	551	589	0.00419584	Down-regulated
ENSSSCG00000036029	Pig	1.17902e-07	-6.37982	4	117	0.00430874	Down-regulated
TMCC3	Pig	1.21639e-07	-1.63029	638	0.67	0.00444529	Down-regulated
BACH2	Pig	1.46117e-07	-3.19353	67	228	0.00533986	Down-regulated
ENSSSCG00000003909	Pig	1.6572e-07	-2.36521	366	492	0.00605625	Down-regulated
DHRS3	Pig	1.79105e-07	-2.64602	98	269	0.00654538	Down-regulated
IL1RAPL1	Pig	1.86211e-07	-3.97049	51	203	0.00680507	Down-regulated
EBF1	Pig	1.87652e-07	-1.25315	713	721	0.00685774	Down-regulated
AFDN	Pig	2.11124e-07	-1.51471	591	614	0.00771551	Down-regulated
FBLN5	Pig	2.14861e-07	-6.9178	0	102	0.0078521	Down-regulated
SYNPO2	Pig	2.23021e-07	-4.68753	12	132	0.00815029	Down-regulated
MRC2	Pig	2.28694e-07	-5.37144	8	122	0.00835762	Down-regulated
ACSS3	Pig	2.37442e-07	-3.72662	31	173	0.00867732	Down-regulated
DENND2A	Pig	3.06542e-07	-5.36911	16	137	0.0112026	Down-regulated
COX1	Pig	3.19975e-07	-2.59113	0.28	426	0.0116935	Down-regulated
VWF	Pig	3.68279e-07	-1.68698	539	584	0.0134588	Down-regulated
SEMA6A	Pig	3.98728e-07	-2.13924	256	421	0.0145715	Down-regulated
MLIP	Pig	4.44241e-07	-8.04953	0	96	0.0162348	Down-regulated
GPC3	Pig	4.58039e-07	-5.64416	8	117	0.016739	Down-regulated
MFAP5	Pig	4.76003e-07	-4.27711	12	127	0.0173955	Down-regulated
MME	Pig	5.00673e-07	-6.19594	4	107	0.0182971	Down-regulated
LRIG1	Pig	5.08562e-07	-2.14627	16	137	0.0185854	Down-regulated
EXT1	Pig	5.19331e-07	-1.16411	709	695	0.0189789	Down-regulated
PACSIN2	Pig	5.29121e-07	-2.16201	331	452	0.0193367	Down-regulated
ENSSSCG00000007735	Pig	6.37551e-07	-1.92303	386	492	0.0232993	Down-regulated
TNXB	Pig	6.85617e-07	-4.56102	16	132	0.0250559	Down-regulated
ENSSSCG00000033570	Pig	7.34283e-07	-4.21728	35	168	0.0268344	Down-regulated
SH3BP5	Pig	8.56078e-07	-2.52517	201	0.36	0.0312854	Down-regulated
IGSF3	Pig	8.68636e-07	-4.18445	28	152	0.0317443	Down-regulated
SNTB1	Pig	1.01614e-06	-4.79109	8	112	0.0371349	Down-regulated
DCN	Pig	1.08703e-06	-2.55894	31	162	0.0397257	Down-regulated

## Sheet: Endocardial lymphatic EC
gene	Species	p_val	avg_log2FC	pct. 1	pct.2	p_val_adj	level
ENSSSCG00000034570	Pig	1.24696e-20	5.14402	0.9	11	4.55701e-16	Up-regulated
RSAD2	Pig	9.60251e-19	8.08094	0.8	11	3.50924e-14	Up-regulated
ISG15	Pig	1.1603e-18	5.73942	0.85	22	4.24031e-14	Up-regulated
ENSSSCG00000032436	Pig	1.90712e-18	8.67961	0.75	0	6.96959e-14	Up-regulated
MX1	Pig	2.00915e-17	7.4879	0.75	11	7.34242e-13	Up-regulated
MX2	Pig	1.55281e-16	4.7863	0.9	78	5.67475e-12	Up-regulated
IFIT1	Pig	7.74912e-15	4.67812	0.75	33	2.83192e-10	Up-regulated
DYSF	Pig	2.63241e-14	4.04077	0.75	33	9.62013e-10	Up-regulated
XPC	Pig	1.54709e-13	4.2781	0.75	44	5.65385e-09	Up-regulated
IFI44	Pig	3.40263e-13	4.13754	0.8	78	1.24349e-08	Up-regulated
ENSSSCG00000012006	Pig	3.7536e-13	4.97679	0.6	11	1.37175e-08	Up-regulated
EPSTI1	Pig	1.57365e-12	3.86284	0.7	44	5.75089e-08	Up-regulated
DYNC1I1	Pig	1.75805e-12	4.30218	0.65	33	6.42479e-08	Up-regulated
ISG12(A)	Pig	2.88833e-12	2.89605	0.8	78	1.05554e-07	Up-regulated
MYLK	Pig	3.41346e-12	6.05548	0.55	11	1.24745e-07	Up-regulated
PARP14	Pig	3.41346e-12	6.05118	0.55	11	1.24745e-07	Up-regulated
ENSSSCG00000016263	Pig	3.72394e-12	2.21622	1	333	1.36091e-07	Up-regulated
ENSSSCG00000014565	Pig	3.77828e-12	5.84055	0.55	11	1.38077e-07	Up-regulated
OAS2	Pig	1.43724e-11	2.60157	0.75	89	5.25239e-07	Up-regulated
HIF1A	Pig	2.26434e-11	2.99926	0.9	167	8.27503e-07	Up-regulated
DDX60	Pig	4.05023e-11	6.44016	0.5	11	1.48016e-06	Up-regulated
ZMAT3	Pig	4.24899e-11	7.32991	0.45	0	1.55279e-06	Up-regulated
ITGA1	Pig	1.18762e-10	4.02609	0.75	122	4.34016e-06	Up-regulated
EIF2AK2	Pig	1.59945e-10	2.82137	0.85	167	5.84518e-06	Up-regulated
MDM2	Pig	1.62551e-10	3.07137	0.85	222	5.94042e-06	Up-regulated
LTBP1	Pig	1.81202e-10	2.91479	0.95	311	6.62202e-06	Up-regulated
SMYD2	Pig	1.81662e-10	3.08816	0.65	56	6.63884e-06	Up-regulated
PDGFC	Pig	2.41895e-10	3.92987	0.6	44	8.84006e-06	Up-regulated
HERC5	Pig	2.74818e-10	3.62949	0.65	67	1.00432e-05	Up-regulated
THSD4	Pig	2.82642e-10	2.68782	0.95	344	1.03291e-05	Up-regulated
SLC7A11	Pig	6.09078e-10	7.48888	0.4	0	2.22588e-05	Up-regulated
KCNN3	Pig	6.29215e-10	3.56621	0.65	67	2.29947e-05	Up-regulated
GJA1	Pig	9.19233e-10	5.20095	0.45	11	3.35934e-05	Up-regulated
PDE5A	Pig	3.16714e-09	2.85413	0.8	156	0.000115743	Up-regulated
DTX3L	Pig	3.39848e-09	3.67086	0.55	44	0.000124198	Up-regulated
ENSSSCG00000011729	Pig	3.99011e-09	2.40701	0.8	167	0.000145819	Up-regulated
RGMB	Pig	4.39431e-09	2.61254	0.9	233	0.00016059	Up-regulated
PCDH17	Pig	4.48304e-09	2.83566	0.65	78	0.000163833	Up-regulated
IFIT5	Pig	5.20887e-09	3.90328	0.5	33	0.000190358	Up-regulated
CALCRL	Pig	6.02966e-09	2.29899	0.95	0.4	0.000220354	Up-regulated
PLK2	Pig	6.92965e-09	3.42295	0.6	67	0.000253244	Up-regulated
BST2	Pig	8.32937e-09	3.28123	0.55	44	0.000304397	Up-regulated
FOSL2	Pig	1.04096e-08	3.79043	0.45	22	0.00038042	Up-regulated
ENSSSCG00000017754	Pig	1.04096e-08	3.28231	0.45	22	0.00038042	Up-regulated
USP18	Pig	1.268e-08	1.92139	0.85	167	0.00046339	Up-regulated
ENSSSCG00000014997	Pig	1.68857e-08	4.47511	0.5	44	0.000617089	Up-regulated
ADGRL2	Pig	1.89448e-08	2.76277	0.75	167	0.000692338	Up-regulated
SKAP2	Pig	2.23079e-08	2.4448	0.7	111	0.000815243	Up-regulated
AHR	Pig	2.34513e-08	2.40871	0.75	156	0.000857026	Up-regulated
ENSSSCG00000013889	Pig	2.70789e-08	3.26901	0.6	78	0.000989598	Up-regulated
UBB	Pig	3.32977e-08	2.8848	0.55	56	0.00121687	Up-regulated
TSPAN12	Pig	3.37538e-08	3.96013	0.5	44	0.00123353	Up-regulated
C2CD3	Pig	3.87287e-08	1.72551	0.7	111	0.00141534	Up-regulated
IGFBP5	Pig	4.57137e-08	3.41214	0.5	44	0.00167061	Up-regulated
OLA1	Pig	6.4094e-08	2.13932	0.65	89	0.00234232	Up-regulated
TRIM22	Pig	7.80915e-08	2.61286	0.55	56	0.00285386	Up-regulated
SAMD9	Pig	9.22377e-08	3.86492	0.45	33	0.00337083	Up-regulated
MRC1	Pig	1.09534e-07	2.45145	0.9	322	0.00400291	Up-regulated
ME1	Pig	1.11421e-07	6.87176	0.3	0	0.0040719	Up-regulated
IFIT2	Pig	1.11421e-07	7.19256	0.3	0	0.0040719	Up-regulated
EGLN3	Pig	1.11421e-07	7.09959	0.3	0	0.0040719	Up-regulated
FAM20A	Pig	1.11421e-07	7.28584	0.3	0	0.0040719	Up-regulated
SYK	Pig	1.2017e-07	2.03878	0.5	44	0.00439161	Up-regulated
HOMER1	Pig	1.26129e-07	5.04804	0.35	11	0.0046094	Up-regulated
GCLM	Pig	1.26129e-07	5.71062	0.35	11	0.0046094	Up-regulated
PHF21B	Pig	1.38803e-07	2.78274	0.55	67	0.00507256	Up-regulated
ENSSSCG00000016687	Pig	1.47649e-07	2.86667	0.45	33	0.00539584	Up-regulated
UBE2H	Pig	1.67336e-07	2.05501	0.9	0.3	0.00611528	Up-regulated
FSTL1	Pig	1.99751e-07	2.72145	0.7	156	0.00729989	Up-regulated
ENSSSCG00000032591	Pig	2.011e-07	4.17216	0.35	11	0.00734921	Up-regulated
ZNFX1	Pig	2.13637e-07	2.12059	0.7	133	0.00780735	Up-regulated
SLC20A2	Pig	2.14563e-07	3.0678	0.6	111	0.00784121	Up-regulated
RESF1	Pig	2.45599e-07	3.07568	0.55	78	0.00897543	Up-regulated
MYORG	Pig	2.60064e-07	3.41024	0.5	67	0.00950402	Up-regulated
MSN	Pig	4.24101e-07	2.83662	0.7	156	0.0154988	Up-regulated
USP53	Pig	4.33979e-07	3.86255	0.55	89	0.0158598	Up-regulated
MEF2A	Pig	4.4294e-07	1.35454	1	644	0.0161872	Up-regulated
PTGIS	Pig	4.52596e-07	2.61075	0.6	0.1	0.0165401	Up-regulated
HERC6	Pig	5.43874e-07	1.99944	0.8	267	0.0198759	Up-regulated
ENSSSCG00000028414	Pig	6.71299e-07	2.95187	0.45	44	0.0245326	Up-regulated
PTPN4	Pig	7.98404e-07	2.78613	0.55	89	0.0291777	Up-regulated
ERCC6	Pig	8.91481e-07	2.71303	0.45	44	0.0325792	Up-regulated
ENSSSCG00000017103	Pig	9.03465e-07	2.5613	0.6	122	0.0330171	Up-regulated
CDKN1A	Pig	9.33558e-07	4.0125	0.4	33	0.0341169	Up-regulated
MTMR2	Pig	1.08406e-06	1.86539	0.85	311	0.039617	Up-regulated
CDK1	Pig	1.08601e-06	4.54408	0.4	33	0.0396882	Up-regulated
IFI44L	Pig	1.10859e-06	2.00534	0.75	222	0.0405134	Up-regulated
TBL1XR1	Pig	1.12095e-06	2.38072	0.75	233	0.040965	Up-regulated
KCNB2	Pig	1.23116e-06	5.86931	0.35	22	0.0449929	Up-regulated
ENSSSCG00000005247	Pig	1.29253e-06	1.99714	0.75	167	0.0472355	Up-regulated
MGMT	Pig	1.33323e-06	1.96832	0.8	267	0.0487227	Up-regulated
PALM2AKAP2	Pig	1.35684e-06	1.85226	0.9	544	0.0495859	Up-regulated
NTN1	Pig	2.21819e-08	-3.03916	0.55	911	0.000810639	Down-regulated
DOCK9	Pig	2.88956e-07	-1.42203	0.95	967	0.0105599	Down-regulated
TTN	Pig	7.53067e-07	-7.19878	0	678	0.0275208	Down-regulated

## Sheet: FB
gene	Species	p_val	avg_log2FC	pct. 1	pct.2	p_val_adj	level
ROR1	Pig	0	5.27484	865	77	0	Up-regulated
NFKBIZ	Pig	0	4.41275	788	68	0	Up-regulated
ENSSSCG00000034570	Pig	0	6.82577	733	16	0	Up-regulated
OAS2	Pig	0	5.14808	743	28	0	Up-regulated
MYO1D	Pig	0	4.37045	0.74	72	0	Up-regulated
RUNX1	Pig	0	5.10943	717	58	0	Up-regulated
MX2	Pig	0	6.83284	665	11	0	Up-regulated
CCND3	Pig	0	2.93082	835	184	0	Up-regulated
ENSSSCG00000004830	Pig	0	4.42074	699	55	0	Up-regulated
GHSR	Pig	0	3.2578	726	109	0	Up-regulated
HMCN1	Pig	0	2.99885	764	152	0	Up-regulated
VMP1	Pig	0	3.36768	0.76	148	0	Up-regulated
COL8A1	Pig	0	3.30531	798	0.19	0	Up-regulated
MX1	Pig	0	4.29203	641	33	0	Up-regulated
ETV6	Pig	0	3.26563	751	0.15	0	Up-regulated
IFI44L	Pig	0	2.89182	694	103	0	Up-regulated
RSAD2	Pig	0	9.08768	593	2	0	Up-regulated
FN1	Pig	0	3.07169	793	214	0	Up-regulated
ENSSSCG00000017146	Pig	0	2.95275	681	104	0	Up-regulated
GPC6	Pig	0	2.40864	896	0.34	0	Up-regulated
USP18	Pig	0	4.38998	577	26	0	Up-regulated
CDH11	Pig	0	2.30146	843	299	0	Up-regulated
PDE4B	Pig	0	6.7467	0.54	17	0	Up-regulated
EIF2AK2	Pig	1.08627e-300	2.7292	657	95	3.96976e-296	Up-regulated
ENSSSCG00000016263	Pig	3.54377e-299	6.66986	495	9	1.29507e-294	Up-regulated
ADAMTS6	Pig	4.01221e-299	6.16342	524	26	1.46626e-294	Up-regulated
HERC6	Pig	1.12759e-298	3.5331	595	61	4.12079e-294	Up-regulated
COL12A1	Pig	3.19552e-295	2.98219	729	183	1.1678e-290	Up-regulated
TNC	Pig	6.82278e-292	8.21451	475	3	2.49338e-287	Up-regulated
TENM3	Pig	9.4705e-287	2.26619	807	277	3.46099e-282	Up-regulated
ISG12(A)	Pig	1.95096e-284	4.1903	505	18	7.1298e-280	Up-regulated
JAK2	Pig	8.04194e-284	2.60307	0.76	226	2.93893e-279	Up-regulated
RAI14	Pig	9.92152e-284	3.02372	671	129	3.62582e-279	Up-regulated
ENSSSCG00000016629	Pig	1.23156e-283	3.07645	682	156	4.50072e-279	Up-regulated
GBE1	Pig	3.40601e-279	2.87606	723	214	1.24473e-274	Up-regulated
HERC5	Pig	7.62427e-278	3.95425	508	25	2.78629e-273	Up-regulated
MAGI1	Pig	3.22065e-277	2.66919	664	119	1.17699e-272	Up-regulated
CAST	Pig	1.01606e-274	3.86336	0.55	56	3.71318e-270	Up-regulated
SFRP1	Pig	4.55127e-272	3.44943	548	49	1.66326e-267	Up-regulated
PTPN13	Pig	9.35651e-269	2.02811	832	323	3.41934e-264	Up-regulated
PRR16	Pig	6.39227e-265	5.3375	484	28	2.33606e-260	Up-regulated
SETX	Pig	1.15234e-264	2.43076	706	164	4.21121e-260	Up-regulated
MAMDC2	Pig	1.39802e-261	3.89499	504	34	5.10908e-257	Up-regulated
IFIT1	Pig	3.75976e-259	4.4098	469	18	1.374e-254	Up-regulated
PEAK1	Pig	5.60922e-259	2.08285	829	362	2.04989e-254	Up-regulated
BST2	Pig	3.99541e-253	9.15095	419	1	1.46012e-248	Up-regulated
RUNX2	Pig	3.55108e-251	4.42322	482	31	1.29774e-246	Up-regulated
GALK2	Pig	1.28433e-247	2.78105	632	126	4.69358e-243	Up-regulated
STAT1	Pig	7.71247e-244	2.34469	641	0.13	2.81852e-239	Up-regulated
IGF1	Pig	9.23753e-241	3.32681	549	77	3.37585e-236	Up-regulated
PAM	Pig	1.6186e-230	1.74283	856	499	5.91516e-226	Up-regulated
CARMIL1	Pig	2.6672e-230	3.08995	519	63	9.74727e-226	Up-regulated
CLU	Pig	2.47111e-227	9.15471	383	2	9.03069e-223	Up-regulated
MGMT	Pig	3.50725e-227	2.64694	621	0.14	1.28172e-222	Up-regulated
EPSTI1	Pig	3.36278e-224	3.72817	0.43	22	1.22893e-219	Up-regulated
EPHA7	Pig	1.14198e-222	12.9601	373	0	4.17335e-218	Up-regulated
GAREM1	Pig	6.14627e-222	3.07283	535	86	2.24615e-217	Up-regulated
IFI44	Pig	1.22387e-221	2.65122	0.5	55	4.47265e-217	Up-regulated
ITPR1	Pig	2.46956e-218	2.29263	644	0.16	9.02501e-214	Up-regulated
COMMD6	Pig	3.12186e-218	2.7251	585	124	1.14088e-213	Up-regulated
AAK1	Pig	1.54883e-217	2.04573	697	0.22	5.66021e-213	Up-regulated
FSTL1	Pig	1.70556e-214	2.09013	712	238	6.23298e-210	Up-regulated
CCDC141	Pig	5.33331e-214	3.51782	0.49	68	1.94906e-209	Up-regulated
SLCO3A1	Pig	1.8566e-213	3.35674	0.5	72	6.78494e-209	Up-regulated
STK38L	Pig	1.13365e-211	6.88738	373	7	4.14292e-207	Up-regulated
ADAM12	Pig	4.32301e-209	2.53995	594	132	1.57984e-204	Up-regulated
MSRB3	Pig	2.69585e-206	3.76855	446	48	9.85198e-202	Up-regulated
SLC38A2	Pig	3.12893e-206	3.78861	0.44	43	1.14347e-201	Up-regulated
CALD1	Pig	9.4026e-204	1.55978	908	0.6	3.43618e-199	Up-regulated
FBXO39	Pig	7.049e-203	3.10546	431	35	2.57606e-198	Up-regulated
NKAIN3	Pig	2.14113e-201	4.85954	385	19	7.82476e-197	Up-regulated
SEC24D	Pig	2.45446e-199	2.12233	659	192	8.96984e-195	Up-regulated
IFIH1	Pig	5.21226e-199	2.98525	434	0.04	1.90482e-194	Up-regulated
TPM1	Pig	9.67362e-199	4.12547	407	31	3.53523e-194	Up-regulated
MEF2A	Pig	1.13524e-198	1.95444	679	224	4.14872e-194	Up-regulated
PRKN	Pig	1.18137e-197	1.99801	661	195	4.3173e-193	Up-regulated
KCNMA1	Pig	2.85539e-197	5.06341	374	17	1.0435e-192	Up-regulated
PAPPA	Pig	1.06576e-193	2.05374	709	265	3.89481e-189	Up-regulated
EFNA5	Pig	1.71082e-193	2.49131	564	0.13	6.25219e-189	Up-regulated
ATP2A2	Pig	2.40265e-192	4.2306	378	21	8.78049e-188	Up-regulated
PLOD2	Pig	9.84872e-192	1.78179	0.8	377	3.59921e-187	Up-regulated
CADPS2	Pig	2.76562e-187	3.13898	449	57	1.0107e-182	Up-regulated
PRICKLE1	Pig	7.97326e-185	2.14968	593	147	2.91383e-180	Up-regulated
MDFIC	Pig	1.4803e-184	2.26188	488	78	5.40974e-180	Up-regulated
ENSSSCG00000010893	Pig	1.53003e-184	1.99494	629	179	5.59148e-180	Up-regulated
PARP12	Pig	1.46951e-183	2.89097	425	47	5.37031e-179	Up-regulated
DDX60	Pig	8.30427e-183	5.49527	328	5	3.03479e-178	Up-regulated
MYO1B	Pig	5.27954e-180	2.58132	498	92	1.92941e-175	Up-regulated
MYO1E	Pig	1.16205e-178	4.23947	371	28	4.24672e-174	Up-regulated
GAB1	Pig	2.25924e-175	3.07684	448	72	8.25637e-171	Up-regulated
ATP13A3	Pig	2.5995e-175	3.47454	0.42	58	9.49986e-171	Up-regulated
ADAMTS9	Pig	3.44317e-175	3.09394	449	73	1.25831e-170	Up-regulated
GPM6B	Pig	1.87347e-174	1.89061	0.62	187	6.8466e-170	Up-regulated
CCDC80	Pig	5.60151e-174	2.21373	536	121	2.04707e-169	Up-regulated
RASAL2	Pig	1.44176e-173	1.70349	663	209	5.2689e-169	Up-regulated
CCN2	Pig	2.99233e-173	2.99724	384	35	1.09355e-168	Up-regulated
IGFBP7	Pig	3.31111e-173	2.37918	557	141	1.21004e-168	Up-regulated
PARP14	Pig	2.56384e-172	4.68871	319	8	9.36955e-168	Up-regulated
ISG15	Pig	1.69469e-171	5.68226	311	5	6.19326e-167	Up-regulated
TRIM22	Pig	1.92385e-170	4.64239	331	14	7.03072e-166	Up-regulated
ROR2	Pig	1.5561e-169	4.77691	328	13	5.68676e-165	Up-regulated
SLC40A1	Pig	9.23935e-169	2.24057	569	159	3.37652e-164	Up-regulated
TIMP1	Pig	4.63077e-168	3.59292	341	19	1.69232e-163	Up-regulated
FIGN	Pig	6.13806e-168	2.78005	413	51	2.24315e-163	Up-regulated
YPEL2	Pig	8.55801e-168	3.6736	392	47	3.12753e-163	Up-regulated
RASA1	Pig	1.47309e-167	2.27905	556	152	5.3834e-163	Up-regulated
ZSWIM6	Pig	1.62931e-167	1.95729	619	208	5.9543e-163	Up-regulated
SRPK2	Pig	2.83795e-167	1.79243	641	206	1.03713e-162	Up-regulated
CCN4	Pig	1.48e-166	6.74836	296	3	5.40865e-162	Up-regulated
ZBTB7C	Pig	7.44406e-164	4.50486	331	19	2.72043e-159	Up-regulated
GPC4	Pig	2.44426e-163	2.90302	399	49	8.93254e-159	Up-regulated
UBE2H	Pig	2.62443e-162	1.98945	626	222	9.59098e-158	Up-regulated
FGF2	Pig	1.57233e-161	1.97196	647	234	5.74608e-157	Up-regulated
FAM214A	Pig	1.18408e-160	1.92268	603	195	4.32722e-156	Up-regulated
ADK	Pig	1.26999e-160	3.38476	395	54	4.64118e-156	Up-regulated
RAD51B	Pig	1.53583e-160	1.69752	626	195	5.6127e-156	Up-regulated
PLS3	Pig	1.34014e-159	2.57644	455	85	4.89756e-155	Up-regulated
LGALS3BP	Pig	1.06516e-157	6.12282	288	5	3.89264e-153	Up-regulated
CBLB	Pig	1.54789e-156	1.72781	736	352	5.65678e-152	Up-regulated
ENSSSCG00000038187	Pig	2.5784e-156	2.65393	418	64	9.42276e-152	Up-regulated
SAMD9	Pig	2.08917e-155	5.05144	294	8	7.63488e-151	Up-regulated
ADAMTS3	Pig	1.01899e-152	7.22494	276	3	3.7239e-148	Up-regulated
DNAJC13	Pig	2.69506e-152	2.07011	553	158	9.84909e-148	Up-regulated
ZNFX1	Pig	7.60028e-151	2.52833	387	52	2.77752e-146	Up-regulated
SLC39A14	Pig	2.01165e-150	1.8416	0.58	183	7.35157e-146	Up-regulated
CMSS1	Pig	3.90136e-150	1.94586	577	185	1.42575e-145	Up-regulated
AKAP6	Pig	6.02942e-150	4.72476	0.29	11	2.20345e-145	Up-regulated
SYCP2	Pig	2.29783e-147	3.23623	356	41	8.39742e-143	Up-regulated
SMIM14	Pig	1.34524e-145	1.71596	552	155	4.91619e-141	Up-regulated
B2M	Pig	1.69181e-145	1.7676	506	122	6.18273e-141	Up-regulated
NAV3	Pig	3.6259e-145	3.7912	334	35	1.32509e-140	Up-regulated
RAB31	Pig	6.25815e-145	2.0307	526	0.14	2.28704e-140	Up-regulated
ENSSSCG00000014997	Pig	2.47165e-143	3.13734	343	37	9.03266e-139	Up-regulated
ENSSSCG00000001229	Pig	1.14109e-142	2.09909	435	86	4.17013e-138	Up-regulated
PHTF2	Pig	1.87074e-142	4.0013	316	27	6.83661e-138	Up-regulated
TLN2	Pig	1.18592e-141	1.82877	0.61	235	4.33396e-137	Up-regulated
THBS4	Pig	3.72966e-141	2.34087	474	119	1.363e-136	Up-regulated
PDGFC	Pig	4.03164e-141	8.38331	252	1	1.47336e-136	Up-regulated
TBL1XR1	Pig	7.93833e-141	1.47568	682	294	2.90106e-136	Up-regulated
ST3GAL6	Pig	8.03829e-141	2.04796	439	87	2.93759e-136	Up-regulated
UGP2	Pig	7.04459e-140	2.26601	457	104	2.57445e-135	Up-regulated
CPEB3	Pig	1.17475e-139	5.4557	266	8	4.29313e-135	Up-regulated
FBXO42	Pig	1.48571e-137	2.10301	521	0.15	5.42951e-133	Up-regulated
TANC1	Pig	5.1325e-137	5.89791	256	5	1.87567e-132	Up-regulated
RESF1	Pig	1.04943e-136	4.37134	304	27	3.83514e-132	Up-regulated
LRRFIP2	Pig	1.19567e-136	3.13019	0.33	38	4.36959e-132	Up-regulated
RCAN1	Pig	1.30963e-136	4.41252	294	22	4.78603e-132	Up-regulated
CMPK2	Pig	2.10157e-136	5.39225	256	5	7.68017e-132	Up-regulated
SLC44A1	Pig	6.36303e-135	1.49315	569	179	2.32537e-130	Up-regulated
UBE2E2	Pig	8.33756e-135	1.2664	0.75	367	3.04696e-130	Up-regulated
ZMAT3	Pig	1.4236e-134	7.2904	244	2	5.20254e-130	Up-regulated
CYP1B1	Pig	2.25597e-134	2.21733	387	66	8.24444e-130	Up-regulated
CPM	Pig	3.28168e-133	2.41177	417	87	1.19929e-128	Up-regulated
FBXL20	Pig	6.68948e-133	1.83816	575	197	2.44467e-128	Up-regulated
ME1	Pig	2.27351e-131	5.44065	254	8	8.30856e-127	Up-regulated
ASCC3	Pig	2.59011e-131	1.52047	569	183	9.46557e-127	Up-regulated
PLEKHA6	Pig	3.28827e-131	3.76131	311	33	1.2017e-126	Up-regulated
ACVR2A	Pig	1.77215e-130	2.45311	413	87	6.47634e-126	Up-regulated
SERPINE1	Pig	6.0855e-130	3.21572	0.3	27	2.22395e-125	Up-regulated
SDCBP	Pig	7.25443e-130	2.95363	335	44	2.65113e-125	Up-regulated
MACF1	Pig	1.53393e-129	1.29174	731	0.35	5.60574e-125	Up-regulated
USP15	Pig	1.73944e-129	2.0356	482	133	6.35677e-125	Up-regulated
AHR	Pig	1.7478e-129	5.51216	252	9	6.38734e-125	Up-regulated
CCDC91	Pig	1.98424e-129	2.21074	426	97	7.25142e-125	Up-regulated
OSBPL6	Pig	1.66616e-128	1.79422	463	116	6.08898e-124	Up-regulated
TJP1	Pig	3.15584e-128	2.19493	451	119	1.1533e-123	Up-regulated
POSTN	Pig	1.15515e-127	4.1051	299	0.03	4.22149e-123	Up-regulated
UBE2L6	Pig	1.39634e-127	4.63658	248	7	5.10292e-123	Up-regulated
KLHL24	Pig	1.43436e-126	2.62688	366	66	5.24186e-122	Up-regulated
CD109	Pig	1.46471e-126	2.35852	343	49	5.35278e-122	Up-regulated
PDLIM5	Pig	2.74965e-126	3.27985	287	25	1.00486e-121	Up-regulated
HRH1	Pig	1.87594e-125	5.48046	245	8	6.85562e-121	Up-regulated
ARAP2	Pig	3.44477e-125	2.87006	308	34	1.25889e-120	Up-regulated
ENSSSCG00000032436	Pig	6.99761e-125	5.684	232	3	2.55728e-120	Up-regulated
ZC3H12C	Pig	1.0016e-124	3.763	315	42	3.66036e-120	Up-regulated
ZBP1	Pig	1.77886e-123	5.57037	237	6	6.50085e-119	Up-regulated
CHN1	Pig	1.86387e-123	11.6069	0.22	0	6.8115e-119	Up-regulated
FBXW7	Pig	1.90868e-123	1.93537	446	116	6.97528e-119	Up-regulated
PML	Pig	2.10393e-122	2.08276	375	68	7.68881e-118	Up-regulated
ENSSSCG00000027725	Pig	3.52839e-122	3.48204	293	32	1.28945e-117	Up-regulated
TBC1D32	Pig	6.544e-122	2.77792	335	51	2.3915e-117	Up-regulated
MYOF	Pig	6.61751e-122	2.18884	375	71	2.41837e-117	Up-regulated
VCL	Pig	1.13463e-121	2.06944	451	123	4.14652e-117	Up-regulated
LGALS1	Pig	4.31999e-121	2.61004	285	26	1.57874e-116	Up-regulated
NBAS	Pig	4.5605e-121	1.81022	486	137	1.66664e-116	Up-regulated
DDX5	Pig	1.2971e-120	1.43309	627	263	4.74027e-116	Up-regulated
CCDC6	Pig	3.18515e-120	3.6269	281	28	1.16401e-115	Up-regulated
NCAM1	Pig	6.74309e-120	2.8341	355	67	2.46426e-115	Up-regulated
S100A6	Pig	2.58114e-119	3.42311	256	16	9.43279e-115	Up-regulated
GPSM2	Pig	4.89254e-119	2.41916	348	0.06	1.78798e-114	Up-regulated
YAP1	Pig	6.55592e-119	1.56505	583	219	2.39586e-114	Up-regulated
ENSSSCG00000016687	Pig	8.01255e-119	6.74123	217	2	2.92819e-114	Up-regulated
SMYD3	Pig	1.03814e-118	1.22307	651	265	3.79388e-114	Up-regulated
BNC2	Pig	1.78894e-118	0.918604	0.91	668	6.53769e-114	Up-regulated
HTRA1	Pig	6.04078e-118	1.41394	538	174	2.2076e-113	Up-regulated
MYLK	Pig	6.24116e-117	2.89656	326	53	2.28083e-112	Up-regulated
ERG	Pig	1.12197e-116	4.73227	242	13	4.10025e-112	Up-regulated
ANXA5	Pig	1.91785e-116	1.37321	537	177	7.00879e-112	Up-regulated
FARP1	Pig	2.01863e-116	1.18615	705	316	7.37709e-112	Up-regulated
ERC1	Pig	3.02656e-116	1.22373	753	393	1.10606e-111	Up-regulated
KAT6B	Pig	6.78209e-116	1.6299	537	192	2.47852e-111	Up-regulated
JADE1	Pig	8.43901e-116	4.38455	251	17	3.08404e-111	Up-regulated
MBNL1	Pig	1.0715e-115	1.06442	793	479	3.91578e-111	Up-regulated
RHOBTB3	Pig	3.40118e-115	3.01735	314	47	1.24296e-110	Up-regulated
TENT5A	Pig	2.43259e-114	3.41954	291	37	8.88991e-110	Up-regulated
MYO5A	Pig	4.14749e-114	1.88008	445	125	1.5157e-109	Up-regulated
PCMTD1	Pig	6.14295e-114	1.99038	429	116	2.24494e-109	Up-regulated
PALLD	Pig	7.01785e-113	2.84415	363	81	2.56467e-108	Up-regulated
NCOA3	Pig	2.98702e-112	1.97536	391	0.09	1.09161e-107	Up-regulated
ZC3HAV1	Pig	5.46406e-112	2.17949	355	68	1.99684e-107	Up-regulated
ST8SIA1	Pig	1.82984e-111	3.00255	265	25	6.68716e-107	Up-regulated
C7	Pig	2.18759e-111	2.07454	431	124	7.99456e-107	Up-regulated
DTX3L	Pig	2.95552e-111	3.36353	227	9	1.08009e-106	Up-regulated
PDK4	Pig	5.44323e-111	11.6278	199	0	1.98923e-106	Up-regulated
HSP90AA1	Pig	6.28012e-111	2.65013	311	48	2.29507e-106	Up-regulated
ENSSSCG00000022128	Pig	6.8732e-111	3.1747	292	0.04	2.51181e-106	Up-regulated
RAB3GAP1	Pig	1.15283e-110	4.12731	243	17	4.213e-106	Up-regulated
PXK	Pig	1.76426e-110	2.07131	389	91	6.44747e-106	Up-regulated
ARHGAP42	Pig	3.21916e-110	2.10422	0.48	162	1.17644e-105	Up-regulated
PDGFD	Pig	7.33274e-110	1.2072	722	0.37	2.67975e-105	Up-regulated
SCFD2	Pig	1.29124e-109	1.2148	616	232	4.71885e-105	Up-regulated
XPC	Pig	4.03238e-109	2.48362	0.31	47	1.47363e-104	Up-regulated
SERPINE2	Pig	4.96463e-109	1.96858	397	96	1.81432e-104	Up-regulated
CSGALNACT2	Pig	5.98986e-109	3.49226	264	28	2.18899e-104	Up-regulated
ISM1	Pig	6.66889e-109	2.21839	437	132	2.43715e-104	Up-regulated
CREB3L2	Pig	1.02233e-108	1.12421	629	249	3.73609e-104	Up-regulated
MFHAS1	Pig	3.24286e-108	2.6105	331	62	1.1851e-103	Up-regulated
HOMER1	Pig	9.52251e-108	11.6429	194	0	3.48e-103	Up-regulated
LCLAT1	Pig	1.22144e-107	3.47822	257	26	4.46376e-103	Up-regulated
ENSSSCG00000035751	Pig	2.23204e-107	9.01587	195	0	8.15699e-103	Up-regulated
CHST11	Pig	1.28873e-106	2.88332	271	32	4.70966e-102	Up-regulated
TUSC3	Pig	1.87841e-106	4.91636	214	8	6.86463e-102	Up-regulated
CILP	Pig	2.63151e-106	3.96683	225	12	9.61685e-102	Up-regulated
DCAF6	Pig	2.69254e-106	1.5059	502	178	9.8399e-102	Up-regulated
LNPEP	Pig	3.03435e-106	4.97741	0.21	7	1.1089e-101	Up-regulated
OSBPL9	Pig	3.86394e-106	1.6688	524	197	1.41208e-101	Up-regulated
REXO2	Pig	4.30575e-106	1.16891	607	239	1.57354e-101	Up-regulated
ENSSSCG00000014565	Pig	1.23448e-105	2.6386	266	29	4.51141e-101	Up-regulated
CTNNA1	Pig	3.05249e-105	1.42668	571	241	1.11553e-100	Up-regulated
SLFN11	Pig	7.10261e-105	4.83116	0.21	7	2.59565e-100	Up-regulated
LRRFIP1	Pig	1.08864e-104	1.46699	631	286	3.97843e-100	Up-regulated
CHSY3	Pig	1.58058e-104	1.28058	578	229	5.77622e-100	Up-regulated
AOPEP	Pig	3.27138e-104	0.968596	838	569	1.19553e-99	Up-regulated
ENSSSCG00000014280	Pig	4.53339e-104	1.04913	707	328	1.65673e-99	Up-regulated
CLIC4	Pig	1.73682e-103	1.41011	507	174	6.3472e-99	Up-regulated
IL4R	Pig	8.00831e-103	8.96411	188	1	2.92664e-98	Up-regulated
PLCE1	Pig	1.50006e-102	2.06343	315	56	5.48195e-98	Up-regulated
SERPINH1	Pig	2.35383e-102	1.8759	316	56	8.60206e-98	Up-regulated
ATP2B4	Pig	2.82174e-102	3.20145	258	31	1.03121e-97	Up-regulated
ENSSSCG00000004441	Pig	3.2953e-102	1.29765	477	0.15	1.20427e-97	Up-regulated
ENSSSCG00000035904	Pig	4.04453e-102	2.07204	338	68	1.47807e-97	Up-regulated
C1orf198	Pig	4.27516e-102	7.82725	0.19	2	1.56236e-97	Up-regulated
MEOX1	Pig	7.94328e-102	5.45893	196	4	2.90287e-97	Up-regulated
GSK3B	Pig	8.45999e-102	1.19594	687	0.34	3.0917e-97	Up-regulated
SLC25A12	Pig	8.4802e-102	4.94176	205	8	3.09909e-97	Up-regulated
GLT8D2	Pig	9.43613e-102	1.40359	446	135	3.44843e-97	Up-regulated
PKM	Pig	1.47192e-101	6.45474	191	3	5.37913e-97	Up-regulated
COX2	Pig	1.58275e-101	1.90602	449	141	5.78418e-97	Up-regulated
WWTR1	Pig	2.09406e-101	1.60104	524	193	7.65273e-97	Up-regulated
ABTB2	Pig	2.1281e-101	3.5411	245	25	7.77716e-97	Up-regulated
ACOT9	Pig	2.41456e-101	2.641	351	84	8.82403e-97	Up-regulated
ROBO1	Pig	3.43426e-101	1.15853	609	0.26	1.25505e-96	Up-regulated
GALNT15	Pig	4.05246e-101	1.65585	396	103	1.48097e-96	Up-regulated
ENSSSCG00000033262	Pig	5.90784e-101	1.68433	0.36	81	2.15902e-96	Up-regulated
NEK7	Pig	7.15445e-101	1.52553	514	188	2.61459e-96	Up-regulated
SLC41A2	Pig	1.53025e-100	2.49332	252	27	5.59228e-96	Up-regulated
ENSSSCG00000013889	Pig	1.62614e-100	2.58556	257	29	5.94274e-96	Up-regulated
ENSSSCG00000000530	Pig	2.14866e-100	1.89874	393	107	7.85227e-96	Up-regulated
OGDH	Pig	4.20075e-100	3.6359	235	22	1.53517e-95	Up-regulated
SYBU	Pig	6.15374e-100	5.06759	196	5	2.24888e-95	Up-regulated
TMEM45A	Pig	8.48246e-100	2.23952	0.27	35	3.09991e-95	Up-regulated
NEDD9	Pig	1.31473e-99	3.8801	231	0.02	4.8047e-95	Up-regulated
SAMHD1	Pig	1.42542e-99	1.42037	419	115	5.20921e-95	Up-regulated
SLC20A2	Pig	1.5852e-99	5.12795	195	6	5.7931e-95	Up-regulated
ADD3	Pig	1.73601e-99	1.08168	742	394	6.34426e-95	Up-regulated
PI16	Pig	3.55157e-99	3.93152	213	12	1.29792e-94	Up-regulated
TBC1D1	Pig	4.29946e-99	4.50621	197	6	1.57124e-94	Up-regulated
CAMK2D	Pig	5.67633e-99	0.840656	0.86	588	2.07441e-94	Up-regulated
ATF7IP	Pig	5.95543e-99	1.74155	434	133	2.17641e-94	Up-regulated
P4HA1	Pig	1.16108e-98	1.34507	502	177	4.24315e-94	Up-regulated
INSR	Pig	1.32755e-98	2.92318	295	54	4.85154e-94	Up-regulated
STK17B	Pig	3.40753e-98	3.33967	236	23	1.24528e-93	Up-regulated
USP25	Pig	5.02959e-98	1.18861	631	295	1.83806e-93	Up-regulated
USP24	Pig	1.17e-97	1.33226	538	0.21	4.27575e-93	Up-regulated
ENSSSCG00000009240	Pig	1.40662e-97	4.86211	193	6	5.14051e-93	Up-regulated
STRN	Pig	2.41883e-97	3.75562	224	19	8.8396e-93	Up-regulated
PPIP5K2	Pig	2.69852e-97	2.36067	296	53	9.86174e-93	Up-regulated
HSPA8	Pig	3.69326e-97	4.41616	205	11	1.3497e-92	Up-regulated
EXOC4	Pig	4.17731e-97	0.868669	855	593	1.5266e-92	Up-regulated
SPATA5	Pig	5.46879e-97	1.59221	428	128	1.99857e-92	Up-regulated
THBS2	Pig	9.69975e-97	2.29819	276	41	3.54477e-92	Up-regulated
MYCBP2	Pig	1.65342e-96	1.19654	688	0.35	6.04243e-92	Up-regulated
VCAN	Pig	2.09707e-96	1.01591	763	428	7.66374e-92	Up-regulated
ASPN	Pig	2.45371e-96	2.27649	319	65	8.96707e-92	Up-regulated
FOXP1	Pig	2.68933e-96	0.912	0.81	527	9.82817e-92	Up-regulated
CFAP94	Pig	4.06998e-96	1.23025	449	137	1.48737e-91	Up-regulated
RNLS	Pig	1.1183e-95	1.98751	323	67	4.08684e-91	Up-regulated
DNAJB4	Pig	2.98523e-95	1.95692	347	84	1.09095e-90	Up-regulated
PARP8	Pig	3.33805e-95	1.1846	598	256	1.21989e-90	Up-regulated
ACVR1	Pig	7.73048e-95	1.75477	451	154	2.8251e-90	Up-regulated
ENSSSCG00000008137	Pig	3.29132e-94	1.77113	375	99	1.20281e-89	Up-regulated
FAM78B	Pig	3.87903e-94	3.73235	231	25	1.41759e-89	Up-regulated
COG3	Pig	4.02548e-94	2.21505	307	62	1.47111e-89	Up-regulated
UBASH3B	Pig	6.24986e-94	3.93971	221	0.02	2.28401e-89	Up-regulated
NFAT5	Pig	1.17187e-93	1.16735	609	0.28	4.28259e-89	Up-regulated
ATAD1	Pig	2.69165e-93	1.25791	542	214	9.83664e-89	Up-regulated
BACH1	Pig	8.67477e-93	2.41134	0.3	59	3.17019e-88	Up-regulated
CD44	Pig	1.52212e-92	2.4158	304	62	5.56257e-88	Up-regulated
FAM111A	Pig	2.60443e-92	2.52224	209	15	9.51789e-88	Up-regulated
NPTN	Pig	3.45938e-92	2.06748	0.31	65	1.26423e-87	Up-regulated
MDM2	Pig	6.3184e-92	1.68582	427	137	2.30906e-87	Up-regulated
CTSC	Pig	9.18564e-92	10.9512	167	0	3.35689e-87	Up-regulated
LURAP1L	Pig	1.15359e-91	3.11565	214	18	4.2158e-87	Up-regulated
SDK1	Pig	2.62797e-91	2.64014	289	55	9.60393e-87	Up-regulated
NIBAN1	Pig	3.42989e-91	2.7696	0.27	47	1.25345e-86	Up-regulated
ENSSSCG00000004578	Pig	4.37128e-91	1.15499	439	138	1.59748e-86	Up-regulated
CSNK1G1	Pig	4.47978e-91	1.49437	0.45	148	1.63714e-86	Up-regulated
HIVEP2	Pig	1.31206e-90	1.28648	584	264	4.79491e-86	Up-regulated
GNAI1	Pig	3.12725e-90	1.55668	443	144	1.14285e-85	Up-regulated
GPCPD1	Pig	4.29838e-90	1.55949	506	202	1.57084e-85	Up-regulated
RPL28	Pig	5.23673e-90	1.2998	308	0.06	1.91376e-85	Up-regulated
IQGAP2	Pig	5.34278e-90	1.55083	482	0.18	1.95252e-85	Up-regulated
SPARC	Pig	1.39696e-89	0.97748	598	263	5.10519e-85	Up-regulated
FBXO34	Pig	3.66447e-89	2.01881	0.33	77	1.33918e-84	Up-regulated
TSC22D1	Pig	3.79901e-89	0.93737	463	155	1.38835e-84	Up-regulated
FAP	Pig	5.6232e-89	1.11142	543	222	2.055e-84	Up-regulated
SPTAN1	Pig	7.4577e-89	3.35541	226	27	2.72542e-84	Up-regulated
TRPM7	Pig	8.10143e-89	1.13823	603	284	2.96067e-84	Up-regulated
ELL2	Pig	1.13924e-88	4.89501	189	0.01	4.16334e-84	Up-regulated
ANKS1A	Pig	1.50801e-88	3.07413	231	28	5.51103e-84	Up-regulated
ENSSSCG00000032942	Pig	2.97234e-88	1.79651	338	81	1.08624e-83	Up-regulated
LRP6	Pig	3.60361e-88	1.04735	686	356	1.31694e-83	Up-regulated
MPDZ	Pig	4.52347e-88	1.35718	492	189	1.6531e-83	Up-regulated
NRP2	Pig	7.16148e-88	3.49305	197	13	2.61716e-83	Up-regulated
AMPD3	Pig	1.01664e-87	7.43445	163	1	3.7153e-83	Up-regulated
ENAH	Pig	2.93789e-87	2.85535	0.25	39	1.07365e-82	Up-regulated
SPATS2	Pig	3.38478e-87	2.24949	286	56	1.23697e-82	Up-regulated
ARID5B	Pig	5.48192e-87	1.19409	587	265	2.00337e-82	Up-regulated
GJA1	Pig	4.21666e-86	10.2999	157	0	1.54098e-81	Up-regulated
CRLF1	Pig	4.21667e-86	11.0249	157	0	1.54098e-81	Up-regulated
RABEP1	Pig	6.95191e-86	1.19583	613	286	2.54058e-81	Up-regulated
RCL1	Pig	1.06622e-85	1.60416	329	78	3.89649e-81	Up-regulated
HGF	Pig	1.77107e-85	4.97256	175	7	6.47236e-81	Up-regulated
NUPR1	Pig	1.91169e-85	1.90797	388	122	6.98626e-81	Up-regulated
ADGRL2	Pig	2.24874e-85	1.11617	531	213	8.21804e-81	Up-regulated
SDCCAG8	Pig	2.51845e-85	2.66449	257	44	9.20366e-81	Up-regulated
ENSSSCG00000024974	Pig	2.78296e-85	2.12878	252	39	1.01703e-80	Up-regulated
GUCY1A1	Pig	2.83805e-85	2.14056	248	37	1.03716e-80	Up-regulated
CCN1	Pig	3.4077e-85	3.41837	214	23	1.24535e-80	Up-regulated
PLEKHM3	Pig	3.66367e-85	10.5643	155	0	1.33889e-80	Up-regulated
EMP1	Pig	5.63303e-85	0.963106	0.42	131	2.05859e-80	Up-regulated
R3HDM1	Pig	8.0932e-85	1.52414	384	117	2.95766e-80	Up-regulated
F3	Pig	2.07883e-84	8.29052	155	0	7.59709e-80	Up-regulated
MAP4	Pig	2.40866e-84	1.22426	536	234	8.80245e-80	Up-regulated
NRIP1	Pig	2.56447e-84	1.34251	499	195	9.37184e-80	Up-regulated
GLG1	Pig	4.51153e-84	1.14222	603	274	1.64874e-79	Up-regulated
SIPA1L1	Pig	6.33189e-84	1.03881	0.49	182	2.31399e-79	Up-regulated
HBP1	Pig	7.43319e-84	1.43219	417	133	2.71646e-79	Up-regulated
NLK	Pig	2.88855e-83	2.26236	0.27	52	1.05562e-78	Up-regulated
DAB2	Pig	4.67533e-83	1.29193	563	256	1.7086e-78	Up-regulated
IRF2	Pig	9.25032e-83	1.77445	356	101	3.38053e-78	Up-regulated
RBMS1	Pig	9.28198e-83	0.852017	801	495	3.3921e-78	Up-regulated
SVIL	Pig	9.74505e-83	1.03878	678	377	3.56133e-78	Up-regulated
DZIP1L	Pig	1.64935e-82	3.50136	202	0.02	6.02755e-78	Up-regulated
IQGAP1	Pig	1.67537e-82	1.50023	429	152	6.12265e-78	Up-regulated
UBAC2	Pig	2.31337e-82	2.39195	245	0.04	8.45422e-78	Up-regulated
IKZF2	Pig	3.2049e-82	3.23901	209	24	1.17123e-77	Up-regulated
MORC3	Pig	3.26433e-82	1.70109	307	71	1.19295e-77	Up-regulated
ENSSSCG00000017754	Pig	8.36808e-82	3.1971	189	14	3.05811e-77	Up-regulated
C2CD3	Pig	9.73582e-82	1.62505	336	86	3.55796e-77	Up-regulated
ENSSSCG00000047553	Pig	1.72448e-81	4.305	178	11	6.30212e-77	Up-regulated
OLA1	Pig	1.32186e-80	1.58772	304	69	4.83073e-76	Up-regulated
ZMYND8	Pig	1.38565e-80	2.05835	303	73	5.06387e-76	Up-regulated
C2CD5	Pig	3.69359e-80	1.78364	353	104	1.34982e-75	Up-regulated
ACTB	Pig	5.38046e-80	1.67918	329	86	1.96629e-75	Up-regulated
SEMA3C	Pig	6.01606e-80	2.1076	321	87	2.19857e-75	Up-regulated
OSBPL3	Pig	9.15389e-80	8.62286	147	0	3.34529e-75	Up-regulated
CCSER2	Pig	1.17599e-79	1.16519	529	222	4.29766e-75	Up-regulated
NOTCH2	Pig	1.47602e-79	0.820316	695	0.37	5.3941e-75	Up-regulated
PKDCC	Pig	1.64792e-79	3.42778	208	25	6.02233e-75	Up-regulated
PSMD14	Pig	2.18947e-79	1.61553	312	74	8.0014e-75	Up-regulated
C1orf21	Pig	2.3079e-79	0.909024	755	472	8.43422e-75	Up-regulated
CEMIP2	Pig	2.34008e-79	1.61342	308	74	8.55181e-75	Up-regulated
PARP9	Pig	2.47006e-79	3.90757	165	7	9.02682e-75	Up-regulated
RIMS1	Pig	3.01777e-79	11.7852	145	0	1.10284e-74	Up-regulated
KDM4C	Pig	3.99727e-79	1.33418	431	153	1.4608e-74	Up-regulated
FNIP1	Pig	4.56768e-79	1.11541	603	283	1.66926e-74	Up-regulated
ABHD2	Pig	4.78173e-79	5.32016	0.16	6	1.74748e-74	Up-regulated
IL1R1	Pig	5.0523e-79	0.903327	613	287	1.84636e-74	Up-regulated
ANXA4	Pig	5.52918e-79	2.24381	275	58	2.02064e-74	Up-regulated
AP3B1	Pig	6.79688e-79	1.00769	595	265	2.48392e-74	Up-regulated
TMSB10	Pig	7.72967e-79	1.98383	238	37	2.82481e-74	Up-regulated
TLE1	Pig	9.36087e-79	2.13881	211	26	3.42093e-74	Up-regulated
RABGAP1	Pig	1.14494e-78	1.41628	419	149	4.18418e-74	Up-regulated
KIF1B	Pig	1.95507e-78	1.1116	559	263	7.14481e-74	Up-regulated
SVEP1	Pig	3.70228e-78	1.02456	767	494	1.353e-73	Up-regulated
ZBTB38	Pig	3.87254e-78	2.31953	264	55	1.41522e-73	Up-regulated
BMPR2	Pig	4.1098e-78	1.09688	554	243	1.50192e-73	Up-regulated
PTPN4	Pig	4.59036e-78	4.61629	156	5	1.67755e-73	Up-regulated
SND1	Pig	5.32575e-78	0.834641	561	236	1.94629e-73	Up-regulated
BMT2	Pig	5.72521e-78	1.68529	313	79	2.09228e-73	Up-regulated
CACUL1	Pig	6.15421e-78	1.6046	334	91	2.24906e-73	Up-regulated
ENO1	Pig	6.64276e-78	1.99116	298	71	2.4276e-73	Up-regulated
RRBP1	Pig	6.74908e-78	0.940498	0.56	242	2.46645e-73	Up-regulated
GPR155	Pig	7.95656e-78	1.22679	355	102	2.90773e-73	Up-regulated
PHF21A	Pig	1.54066e-77	1.11004	542	231	5.63035e-73	Up-regulated
BCAT1	Pig	1.93536e-77	5.24231	154	4	7.07276e-73	Up-regulated
FUT8	Pig	2.3956e-77	0.899134	542	226	8.75471e-73	Up-regulated
PLAG1	Pig	3.08109e-77	1.98366	317	84	1.12598e-72	Up-regulated
ENSSSCG00000031462	Pig	6.6156e-77	1.47295	448	177	2.41767e-72	Up-regulated
EDNRA	Pig	9.00884e-77	10.7673	141	0	3.29228e-72	Up-regulated
ITGAV	Pig	2.10974e-76	1.40491	356	105	7.71003e-72	Up-regulated
SOCS5	Pig	2.45647e-76	1.44539	426	155	8.97717e-72	Up-regulated
CHODL	Pig	5.93624e-76	2.37447	217	32	2.1694e-71	Up-regulated
NSD3	Pig	6.78773e-76	1.20339	541	238	2.48058e-71	Up-regulated
MTUS1	Pig	1.03966e-75	3.31891	214	32	3.79944e-71	Up-regulated
VDR	Pig	1.1628e-75	4.76641	147	3	4.24944e-71	Up-regulated
OSBPL11	Pig	3.31546e-75	3.96095	171	13	1.21163e-70	Up-regulated
USP6NL	Pig	6.93785e-75	2.50525	204	26	2.53544e-70	Up-regulated
SLC30A7	Pig	9.01294e-75	1.04842	399	0.13	3.29378e-70	Up-regulated
RTN4	Pig	9.38864e-75	0.888607	614	302	3.43108e-70	Up-regulated
RASSF8	Pig	1.18845e-74	1.11935	511	219	4.34319e-70	Up-regulated
IFIT5	Pig	1.37468e-74	1.45183	246	45	5.02378e-70	Up-regulated
SLC10A7	Pig	1.58729e-74	1.5372	316	83	5.80074e-70	Up-regulated
LGALS8	Pig	2.03229e-74	1.52147	311	0.08	7.42699e-70	Up-regulated
PRRX2	Pig	2.62432e-74	1.55272	278	62	9.59059e-70	Up-regulated
DAAM1	Pig	4.21102e-74	1.0445	629	319	1.53892e-69	Up-regulated
CPEB2	Pig	4.53881e-74	2.18026	244	47	1.65871e-69	Up-regulated
RPL29	Pig	4.651e-74	1.83348	228	37	1.69971e-69	Up-regulated
NBN	Pig	4.83303e-74	1.0741	0.56	246	1.76623e-69	Up-regulated
NCEH1	Pig	5.34409e-74	10.2789	136	0	1.953e-69	Up-regulated
RICTOR	Pig	8.67117e-74	1.20418	443	0.17	3.16888e-69	Up-regulated
ENSSSCG00000001341	Pig	1.32061e-73	1.25061	381	124	4.82618e-69	Up-regulated
CTHRC1	Pig	1.64097e-73	3.37734	157	8	5.99693e-69	Up-regulated
GALNT10	Pig	2.56808e-73	0.814903	504	0.2	9.38504e-69	Up-regulated
MARCHF8	Pig	3.26313e-73	3.49758	184	0.02	1.19251e-68	Up-regulated
NCBP1	Pig	3.4335e-73	4.10411	155	7	1.25477e-68	Up-regulated
AMMECR1	Pig	7.50058e-73	2.39003	252	54	2.74109e-68	Up-regulated
EPS8	Pig	8.24456e-73	0.720295	729	411	3.01297e-68	Up-regulated
PLEKHA7	Pig	1.02982e-72	2.82389	197	26	3.76348e-68	Up-regulated
RNFT1	Pig	1.07134e-72	3.03556	0.19	22	3.91522e-68	Up-regulated
IL17RD	Pig	1.24096e-72	1.18041	309	81	4.5351e-68	Up-regulated
KLF7	Pig	1.3903e-72	0.696465	554	237	5.08083e-68	Up-regulated
GOLGA4	Pig	1.62734e-72	2.31296	239	47	5.94712e-68	Up-regulated
PTPRK	Pig	1.64693e-72	1.30223	438	176	6.01872e-68	Up-regulated
BAZ1A	Pig	1.64864e-72	2.29365	267	61	6.02495e-68	Up-regulated
CLTC	Pig	2.43513e-72	1.37178	383	128	8.89917e-68	Up-regulated
PSMD1	Pig	3.20454e-72	1.51071	333	99	1.1711e-67	Up-regulated
MRTFA	Pig	3.8632e-72	0.97755	497	206	1.41181e-67	Up-regulated
LRP12	Pig	5.90177e-72	2.33058	261	0.06	2.1568e-67	Up-regulated
RBKS	Pig	6.7361e-72	2.90377	207	31	2.46171e-67	Up-regulated
RPS15	Pig	1.01696e-71	1.3777	351	107	3.71647e-67	Up-regulated
MYOCD	Pig	1.0692e-71	4.97643	142	3	3.90737e-67	Up-regulated
SYNJ2	Pig	1.09198e-71	1.76993	244	47	3.99063e-67	Up-regulated
ENSSSCG00000011237	Pig	1.19588e-71	0.943711	464	178	4.37036e-67	Up-regulated
SETDB2	Pig	1.20697e-71	3.84846	0.16	0.01	4.41085e-67	Up-regulated
HERC4	Pig	1.22115e-71	1.31706	417	0.16	4.46271e-67	Up-regulated
ELF1	Pig	4.91708e-71	1.36974	427	162	1.79695e-66	Up-regulated
ADAMTS5	Pig	4.93811e-71	1.28012	506	238	1.80463e-66	Up-regulated
ENSSSCG00000004666	Pig	5.06109e-71	1.11074	0.33	94	1.84958e-66	Up-regulated
SNTB2	Pig	5.94319e-71	0.876596	614	0.3	2.17194e-66	Up-regulated
PLEKHA4	Pig	7.30522e-71	2.89985	169	14	2.66969e-66	Up-regulated
SP110	Pig	1.2126e-70	2.39442	192	24	4.43144e-66	Up-regulated
ENSSSCG00000042520	Pig	2.26608e-70	2.64484	178	18	8.2814e-66	Up-regulated
RAPGEF2	Pig	2.58487e-70	0.988357	0.5	222	9.44643e-66	Up-regulated
ENSSSCG00000014672	Pig	3.0244e-70	5.69124	137	3	1.10527e-65	Up-regulated
CDH13	Pig	4.74184e-70	3.41739	157	0.01	1.73291e-65	Up-regulated
CLIP1	Pig	5.5261e-70	0.971074	644	333	2.01951e-65	Up-regulated
FAM126A	Pig	6.38053e-70	1.13624	471	194	2.33176e-65	Up-regulated
CASK	Pig	8.68687e-70	0.842008	565	0.26	3.17462e-65	Up-regulated
RASSF9	Pig	1.25882e-69	2.25285	186	22	4.60037e-65	Up-regulated
TRPS1	Pig	1.31293e-69	0.665304	861	622	4.79811e-65	Up-regulated
AGMO	Pig	1.47093e-69	1.55403	269	64	5.37552e-65	Up-regulated
DSEL	Pig	2.50513e-69	2.30309	195	27	9.15498e-65	Up-regulated
KIAA1217	Pig	2.77704e-69	1.13076	392	138	1.01487e-64	Up-regulated
GPD2	Pig	3.65573e-69	3.29185	0.18	21	1.33599e-64	Up-regulated
FBXL7	Pig	4.32766e-69	0.728209	865	656	1.58154e-64	Up-regulated
EIF3M	Pig	5.69263e-69	1.49934	277	69	2.08037e-64	Up-regulated
TTC23	Pig	6.05579e-69	7.47185	128	0	2.21309e-64	Up-regulated
RAB1A	Pig	9.6403e-69	1.2256	421	159	3.52305e-64	Up-regulated
RFX7	Pig	1.20448e-68	1.18424	449	176	4.40176e-64	Up-regulated
KANSL1	Pig	2.50553e-68	0.897267	689	383	9.15645e-64	Up-regulated
RCSD1	Pig	2.80798e-68	3.78326	0.16	13	1.02618e-63	Up-regulated
KDM3A	Pig	3.38692e-68	1.80625	0.27	66	1.23775e-63	Up-regulated
GNAO1	Pig	3.49911e-68	10.6011	125	0	1.27875e-63	Up-regulated
FGFR2	Pig	4.99732e-68	1.98618	222	41	1.82627e-63	Up-regulated
SELENOM	Pig	7.28235e-68	2.42829	163	14	2.66133e-63	Up-regulated
SERTAD2	Pig	8.13447e-68	3.2329	174	19	2.97274e-63	Up-regulated
REEP3	Pig	8.87757e-68	0.900969	694	395	3.24431e-63	Up-regulated
CORIN	Pig	9.84931e-68	7.66205	126	0	3.59943e-63	Up-regulated
SLC20A1	Pig	1.48772e-67	2.35154	211	36	5.43687e-63	Up-regulated
KIF3C	Pig	1.48955e-67	2.49831	196	29	5.44355e-63	Up-regulated
TRIB2	Pig	2.98678e-67	2.72078	209	36	1.09152e-62	Up-regulated
LOXL1	Pig	2.98966e-67	1.34424	278	0.07	1.09257e-62	Up-regulated
PFKFB4	Pig	3.51894e-67	4.6625	0.15	0.01	1.286e-62	Up-regulated
RNF13	Pig	3.86108e-67	1.26494	384	137	1.41103e-62	Up-regulated
ARMC2	Pig	4.85321e-67	1.56247	387	146	1.77361e-62	Up-regulated
SERINC5	Pig	1.01171e-66	2.17824	238	52	3.69728e-62	Up-regulated
PLEC	Pig	1.16386e-66	4.25866	151	11	4.25334e-62	Up-regulated
HTR2A	Pig	1.89421e-66	7.82457	125	1	6.92239e-62	Up-regulated
TMEM65	Pig	2.01416e-66	1.90202	266	68	7.36073e-62	Up-regulated
PIK3CA	Pig	2.18509e-66	1.07544	429	162	7.98543e-62	Up-regulated
TXNRD1	Pig	2.52347e-66	1.51432	277	71	9.22203e-62	Up-regulated
APPL2	Pig	4.35424e-66	2.49061	216	42	1.59126e-61	Up-regulated
VWA5A	Pig	7.12925e-66	1.29483	302	85	2.60538e-61	Up-regulated
C21orf91	Pig	8.92821e-66	1.57537	305	87	3.26281e-61	Up-regulated
IPMK	Pig	9.54697e-66	3.29418	168	18	3.48894e-61	Up-regulated
ANKRD17	Pig	1.15435e-65	0.873239	614	333	4.21858e-61	Up-regulated
RIC8B	Pig	1.38308e-65	1.83488	0.27	0.07	5.05446e-61	Up-regulated
ACTN1	Pig	1.66272e-65	1.04161	0.38	132	6.0764e-61	Up-regulated
KIFAP3	Pig	3.04623e-65	0.796185	401	144	1.11325e-60	Up-regulated
CST3	Pig	4.49642e-65	3.52261	137	6	1.64322e-60	Up-regulated
GOLGB1	Pig	4.5485e-65	1.21868	452	187	1.66225e-60	Up-regulated
ATXN7L1	Pig	8.31188e-65	1.42797	372	133	3.03758e-60	Up-regulated
SNX18	Pig	1.00541e-64	1.90027	0.24	53	3.67426e-60	Up-regulated
ENSSSCG00000014242	Pig	1.296e-64	3.137	0.19	0.03	4.73624e-60	Up-regulated
ZFAND3	Pig	1.64389e-64	0.71312	808	562	6.00759e-60	Up-regulated
CCNT1	Pig	1.84931e-64	2.43876	201	35	6.75829e-60	Up-regulated
TMOD3	Pig	1.8657e-64	0.946159	415	159	6.8182e-60	Up-regulated
TGFBR1	Pig	2.41911e-64	1.2147	306	89	8.84063e-60	Up-regulated
ANKRD28	Pig	3.74193e-64	0.886102	496	219	1.36749e-59	Up-regulated
WDR7	Pig	3.83843e-64	1.07916	415	162	1.40276e-59	Up-regulated
CCL2	Pig	3.86308e-64	2.05937	193	0.03	1.41176e-59	Up-regulated
TXNIP	Pig	4.29402e-64	0.817778	596	302	1.56925e-59	Up-regulated
WNK1	Pig	5.48795e-64	1.13539	0.46	202	2.00557e-59	Up-regulated
CTSH	Pig	5.87236e-64	1.10687	0.31	91	2.14605e-59	Up-regulated
DYNC1I1	Pig	1.25635e-63	10.136	117	0	4.59134e-59	Up-regulated
ADAR	Pig	1.86565e-63	1.69718	234	51	6.81802e-59	Up-regulated
RFTN2	Pig	2.17912e-63	1.15375	324	101	7.96361e-59	Up-regulated
PLPP1	Pig	2.2368e-63	1.13405	542	272	8.17437e-59	Up-regulated
ENSSSCG00000011272	Pig	2.55534e-63	1.54216	218	42	9.33848e-59	Up-regulated
ENDOV	Pig	2.67074e-63	2.14103	193	31	9.76024e-59	Up-regulated
PPA1	Pig	3.23589e-63	4.91512	125	3	1.18255e-58	Up-regulated
ECM2	Pig	3.71703e-63	1.50588	343	116	1.35839e-58	Up-regulated
PDE8A	Pig	3.75985e-63	1.13772	414	162	1.37404e-58	Up-regulated
SLMAP	Pig	4.90661e-63	1.07255	395	153	1.79312e-58	Up-regulated
FAM13B	Pig	5.69324e-63	0.990439	505	223	2.08059e-58	Up-regulated
TEAD1	Pig	6.25938e-63	0.982412	681	413	2.28749e-58	Up-regulated
SNX24	Pig	6.34259e-63	1.14256	329	104	2.3179e-58	Up-regulated
PTX3	Pig	8.81113e-63	2.9385	165	19	3.22003e-58	Up-regulated
TBC1D9	Pig	1.49422e-62	4.03309	144	11	5.46062e-58	Up-regulated
SLC1A2	Pig	1.882e-62	4.88696	0.13	5	6.87776e-58	Up-regulated
LAP3	Pig	2.30114e-62	4.14226	138	8	8.4095e-58	Up-regulated
CSNK1G3	Pig	3.66417e-62	0.840408	409	154	1.33907e-57	Up-regulated
TSC22D2	Pig	4.24766e-62	1.61174	295	91	1.55231e-57	Up-regulated
ABCD3	Pig	5.34816e-62	2.24445	204	38	1.95449e-57	Up-regulated
MCFD2	Pig	5.88074e-62	2.53987	0.21	42	2.14912e-57	Up-regulated
GAB2	Pig	6.21142e-62	1.00853	739	492	2.26996e-57	Up-regulated
PDLIM7	Pig	6.43528e-62	2.73455	198	37	2.35177e-57	Up-regulated
ENSSSCG00000012006	Pig	6.86152e-62	4.03958	0.13	6	2.50754e-57	Up-regulated
ZZZ3	Pig	7.08983e-62	0.926274	525	241	2.59098e-57	Up-regulated
STPG4	Pig	7.28278e-62	2.30465	204	39	2.66149e-57	Up-regulated
MEIS2	Pig	7.47434e-62	0.812855	0.67	0.39	2.7315e-57	Up-regulated
ITPRID2	Pig	1.08105e-61	1.10544	337	111	3.95069e-57	Up-regulated
FLNA	Pig	1.57754e-61	2.72714	183	29	5.76512e-57	Up-regulated
DIPK1A	Pig	1.71075e-61	2.42405	218	47	6.25193e-57	Up-regulated
LRRK2	Pig	2.9605e-61	1.33795	367	135	1.08192e-56	Up-regulated
PRRG1	Pig	3.7498e-61	3.10796	168	22	1.37036e-56	Up-regulated
FAM168A	Pig	3.92412e-61	1.31297	331	0.11	1.43407e-56	Up-regulated
ERBB4	Pig	4.44622e-61	8.09913	114	0	1.62487e-56	Up-regulated
SMURF1	Pig	4.75626e-61	1.31685	349	121	1.73817e-56	Up-regulated
GATA6	Pig	5.02716e-61	4.79859	131	7	1.83717e-56	Up-regulated
ENSSSCG00000049691	Pig	5.40424e-61	0.805267	567	276	1.97498e-56	Up-regulated
RANBP9	Pig	5.85416e-61	1.38498	366	135	2.1394e-56	Up-regulated
FTL	Pig	6.69951e-61	2.14419	186	0.03	2.44833e-56	Up-regulated
ZNF654	Pig	9.07281e-61	1.3219	0.35	126	3.31566e-56	Up-regulated
ETNK1	Pig	1.73562e-60	1.23987	324	104	6.34283e-56	Up-regulated
ENSSSCG00000007203	Pig	1.87639e-60	1.11776	335	112	6.85727e-56	Up-regulated
BICC1	Pig	2.73638e-60	0.686333	899	704	1.00001e-55	Up-regulated
ENSSSCG00000035460	Pig	3.12487e-60	1.10557	295	89	1.14198e-55	Up-regulated
TRHDE	Pig	4.3265e-60	5.03182	123	4	1.58112e-55	Up-regulated
ARFGEF1	Pig	5.0239e-60	0.85459	532	261	1.83598e-55	Up-regulated
SETD7	Pig	5.61919e-60	1.48688	323	0.11	2.05353e-55	Up-regulated
DIP2B	Pig	6.43371e-60	1.02734	439	186	2.3512e-55	Up-regulated
ITGB1	Pig	9.00304e-60	0.750425	0.58	288	3.29016e-55	Up-regulated
SCFD1	Pig	9.06617e-60	0.901323	414	161	3.31323e-55	Up-regulated
FLRT2	Pig	1.13698e-59	1.35892	258	69	4.15508e-55	Up-regulated
STT3B	Pig	1.35437e-59	0.774359	502	226	4.94953e-55	Up-regulated
UHRF1BP1L	Pig	1.60453e-59	0.850802	335	112	5.86376e-55	Up-regulated
ESYT2	Pig	1.70295e-59	1.43501	324	112	6.22344e-55	Up-regulated
MTMR2	Pig	1.88506e-59	0.952882	0.36	125	6.88893e-55	Up-regulated
EIF2AK3	Pig	2.58944e-59	0.749162	488	0.21	9.46312e-55	Up-regulated
ENSSSCG00000027124	Pig	2.74747e-59	3.85755	124	5	1.00406e-54	Up-regulated
ACSS3	Pig	3.60572e-59	1.2665	466	226	1.31771e-54	Up-regulated
ENSSSCG00000006206	Pig	6.6482e-59	1.69201	0.27	77	2.42958e-54	Up-regulated
LPP	Pig	1.00758e-58	0.603176	761	495	3.68219e-54	Up-regulated
PPP4R2	Pig	1.31586e-58	1.12186	323	106	4.8088e-54	Up-regulated
MAX	Pig	1.89422e-58	1.67517	234	57	6.92244e-54	Up-regulated
FMO4	Pig	1.96988e-58	1.19899	355	0.13	7.19892e-54	Up-regulated
THSD1	Pig	2.72663e-58	1.77323	187	32	9.96447e-54	Up-regulated
PLXDC2	Pig	2.75914e-58	0.586923	939	852	1.00833e-53	Up-regulated
DLG1	Pig	3.14935e-58	0.804265	612	0.33	1.15093e-53	Up-regulated
NXN	Pig	3.40166e-58	0.908628	326	108	1.24314e-53	Up-regulated
TCP11L2	Pig	3.72187e-58	2.52733	177	28	1.36016e-53	Up-regulated
GALNT18	Pig	4.05356e-58	2.1248	188	34	1.48137e-53	Up-regulated
SPOCK1	Pig	4.28183e-58	6.14446	119	4	1.5648e-53	Up-regulated
SNX13	Pig	6.16872e-58	1.35729	307	101	2.25436e-53	Up-regulated
VGLL3	Pig	6.73834e-58	1.29155	0.27	77	2.46253e-53	Up-regulated
IL34	Pig	9.20461e-58	1.8503	264	77	3.36383e-53	Up-regulated
LHFPL6	Pig	1.02727e-57	0.690801	712	427	3.75414e-53	Up-regulated
ACSL4	Pig	2.05591e-57	0.897757	0.54	269	7.51334e-53	Up-regulated
BHLHE40	Pig	2.29842e-57	3.70369	126	7	8.39959e-53	Up-regulated
PLSCR1	Pig	2.44234e-57	0.745132	446	189	8.92555e-53	Up-regulated
HLCS	Pig	2.57509e-57	0.867141	289	87	9.41067e-53	Up-regulated
TTC27	Pig	3.13493e-57	1.70962	0.21	44	1.14566e-52	Up-regulated
SLC25A26	Pig	3.22495e-57	1.50183	228	54	1.17856e-52	Up-regulated
TTC39B	Pig	4.35234e-57	2.25318	198	0.04	1.59056e-52	Up-regulated
ATXN1	Pig	4.86778e-57	0.738282	641	374	1.77893e-52	Up-regulated
BABAM2	Pig	6.51141e-57	0.830825	629	352	2.37959e-52	Up-regulated
TPM4	Pig	7.37701e-57	1.02519	203	41	2.69593e-52	Up-regulated
EHD4	Pig	8.46305e-57	2.51234	176	0.03	3.09282e-52	Up-regulated
CD81	Pig	8.95883e-57	1.24197	331	118	3.274e-52	Up-regulated
LCOR	Pig	1.23168e-56	0.918246	488	229	4.50118e-52	Up-regulated
FHL2	Pig	1.2425e-56	2.03721	115	3	4.54071e-52	Up-regulated
ZCCHC2	Pig	1.66912e-56	1.96738	198	0.04	6.09979e-52	Up-regulated
UBAP2	Pig	2.06714e-56	1.46999	344	132	7.55435e-52	Up-regulated
ZNF106	Pig	2.13281e-56	3.85914	128	9	7.79436e-52	Up-regulated
HEATR5B	Pig	2.64713e-56	1.82207	204	43	9.67393e-52	Up-regulated
RNF125	Pig	3.45252e-56	1.2284	254	69	1.26172e-51	Up-regulated
BMPR1B	Pig	4.17415e-56	10.2953	104	0	1.52544e-51	Up-regulated
VPS13C	Pig	4.57569e-56	1.01667	0.44	195	1.67219e-51	Up-regulated
PNPT1	Pig	4.93084e-56	2.30777	177	0.03	1.80197e-51	Up-regulated
ATXN7	Pig	5.6975e-56	1.0932	378	147	2.08215e-51	Up-regulated
CNNM2	Pig	6.84103e-56	2.43446	202	44	2.50005e-51	Up-regulated
PMS1	Pig	8.06029e-56	2.07607	218	53	2.94563e-51	Up-regulated
ANGPT1	Pig	8.23326e-56	1.44676	213	48	3.00885e-51	Up-regulated
ZFYVE16	Pig	9.24405e-56	0.964033	449	195	3.37824e-51	Up-regulated
ITGA2B	Pig	9.73962e-56	0.968946	474	219	3.55934e-51	Up-regulated
ENSSSCG00000007080	Pig	1.08332e-55	1.38502	298	98	3.959e-51	Up-regulated
ROCK2	Pig	1.16108e-55	0.794134	472	215	4.24315e-51	Up-regulated
LRIG3	Pig	1.32503e-55	1.27352	233	0.06	4.84234e-51	Up-regulated
FOXS1	Pig	1.61681e-55	4.41702	113	3	5.90863e-51	Up-regulated
ENSSSCG00000005959	Pig	2.24202e-55	4.39939	119	6	8.19345e-51	Up-regulated
SKIL	Pig	4.07185e-55	0.994734	0.33	118	1.48806e-50	Up-regulated
ALDH2	Pig	4.33664e-55	1.98701	153	19	1.58483e-50	Up-regulated
RPL35	Pig	4.72896e-55	1.43739	0.22	51	1.7282e-50	Up-regulated
ARRDC4	Pig	5.70414e-55	4.02513	116	5	2.08458e-50	Up-regulated
ABHD18	Pig	9.23114e-55	5.10306	114	5	3.37352e-50	Up-regulated
ITGA9	Pig	9.34085e-55	2.05621	209	49	3.41361e-50	Up-regulated
CTDSPL	Pig	1.20663e-54	0.97697	524	262	4.40963e-50	Up-regulated
REEP5	Pig	1.36453e-54	1.8423	222	55	4.98668e-50	Up-regulated
TTC37	Pig	1.43427e-54	0.912286	349	127	5.24153e-50	Up-regulated
SESN3	Pig	1.81914e-54	0.688648	422	179	6.64803e-50	Up-regulated
RARS2	Pig	2.03635e-54	1.8104	208	47	7.44184e-50	Up-regulated
TMEM161B	Pig	2.15533e-54	1.44283	245	67	7.87665e-50	Up-regulated
DST	Pig	2.22846e-54	0.739199	829	0.62	8.1439e-50	Up-regulated
LMNTD1	Pig	2.29822e-54	1.98515	198	43	8.39885e-50	Up-regulated
MAP3K8	Pig	2.54717e-54	2.8044	143	16	9.30862e-50	Up-regulated
IVNS1ABP	Pig	2.7403e-54	4.59897	114	5	1.00144e-49	Up-regulated
ACSL5	Pig	3.05267e-54	2.10262	171	29	1.1156e-49	Up-regulated
ENSSSCG00000036556	Pig	3.12901e-54	1.44972	221	54	1.1435e-49	Up-regulated
CNOT6	Pig	3.29363e-54	1.76338	221	55	1.20366e-49	Up-regulated
RNF19A	Pig	3.83232e-54	0.616015	0.58	294	1.40052e-49	Up-regulated
TBC1D23	Pig	3.93492e-54	1.09638	355	135	1.43802e-49	Up-regulated
UGGT1	Pig	3.94295e-54	1.42882	0.3	102	1.44095e-49	Up-regulated
ABL1	Pig	4.98559e-54	1.12816	413	185	1.82198e-49	Up-regulated
AFG1L	Pig	5.16328e-54	1.69121	225	57	1.88692e-49	Up-regulated
ACKR4	Pig	6.62719e-54	6.81736	105	2	2.42191e-49	Up-regulated
OSBPL1A	Pig	7.01298e-54	1.08789	391	165	2.56289e-49	Up-regulated
MTAP	Pig	7.43075e-54	1.47069	193	0.04	2.71557e-49	Up-regulated
GXYLT2	Pig	1.06241e-53	0.763339	535	266	3.88256e-49	Up-regulated
GPR39	Pig	1.08395e-53	5.60507	108	3	3.96128e-49	Up-regulated
SMARCAD1	Pig	1.19524e-53	0.96004	312	105	4.36799e-49	Up-regulated
ALS2	Pig	1.32351e-53	2.74029	155	23	4.83677e-49	Up-regulated
ATP1A1	Pig	1.63021e-53	4.24973	108	3	5.95759e-49	Up-regulated
PSMA6	Pig	1.99699e-53	1.3993	235	63	7.29798e-49	Up-regulated
PLBD1	Pig	2.05124e-53	3.32543	138	15	7.49625e-49	Up-regulated
KLF6	Pig	2.07612e-53	0.955172	239	64	7.58718e-49	Up-regulated
PICALM	Pig	2.41964e-53	0.777706	549	286	8.84258e-49	Up-regulated
MAST2	Pig	3.12913e-53	2.02805	193	42	1.14354e-48	Up-regulated
DDIT4	Pig	3.21658e-53	1.11235	0.33	123	1.1755e-48	Up-regulated
ADGRA3	Pig	3.45173e-53	1.85201	235	65	1.26143e-48	Up-regulated
COL5A2	Pig	3.7719e-53	0.512516	902	762	1.37844e-48	Up-regulated
LTBP2	Pig	4.24782e-53	0.822988	362	0.14	1.55237e-48	Up-regulated
IRS2	Pig	4.48316e-53	5.60729	107	3	1.63837e-48	Up-regulated
ENSSSCG00000039926	Pig	6.38427e-53	1.42135	205	47	2.33313e-48	Up-regulated
PPP1R12B	Pig	6.70742e-53	2.20091	186	39	2.45123e-48	Up-regulated
ENSSSCG00000000145	Pig	1.02114e-52	1.32847	276	87	3.73177e-48	Up-regulated
SLC2A13	Pig	1.05784e-52	0.620317	453	197	3.86588e-48	Up-regulated
METAP1	Pig	1.20425e-52	2.96438	149	21	4.40091e-48	Up-regulated
SHROOM4	Pig	1.21189e-52	1.2951	203	46	4.42885e-48	Up-regulated
RPH3AL	Pig	1.25107e-52	3.34506	147	0.02	4.57203e-48	Up-regulated
DERA	Pig	1.38052e-52	2.81488	151	22	5.04512e-48	Up-regulated
F2R	Pig	1.69581e-52	2.23372	151	21	6.19732e-48	Up-regulated
WBP1L	Pig	1.89565e-52	1.11958	423	185	6.92766e-48	Up-regulated
USO1	Pig	1.90299e-52	1.09832	0.39	162	6.95446e-48	Up-regulated
DPY19L1	Pig	2.03978e-52	0.711537	452	198	7.45438e-48	Up-regulated
PDE4DIP	Pig	3.36879e-52	3.60728	102	2	1.23113e-47	Up-regulated
KLHL3	Pig	3.80759e-52	6.3777	101	2	1.39148e-47	Up-regulated
TBC1D19	Pig	5.33971e-52	1.41272	238	66	1.9514e-47	Up-regulated
MIPOL1	Pig	6.88887e-52	0.877384	346	128	2.51754e-47	Up-regulated
KIF26B	Pig	8.2061e-52	4.5696	105	3	2.99892e-47	Up-regulated
HSD17B12	Pig	9.60935e-52	1.13454	244	67	3.51174e-47	Up-regulated
TRAK1	Pig	1.13889e-51	1.39105	294	104	4.16206e-47	Up-regulated
RAP1GDS1	Pig	1.38198e-51	1.69882	198	45	5.05043e-47	Up-regulated
TLK1	Pig	1.42725e-51	0.773732	562	0.29	5.21589e-47	Up-regulated
CASP10	Pig	1.68681e-51	1.18018	219	55	6.16443e-47	Up-regulated
ENSSSCG00000029830	Pig	1.72601e-51	1.3483	199	45	6.30769e-47	Up-regulated
SENP7	Pig	2.00359e-51	0.909194	348	132	7.32214e-47	Up-regulated
NR6A1	Pig	2.28042e-51	1.52727	229	63	8.33378e-47	Up-regulated
ENSSSCG00000006418	Pig	2.37286e-51	3.47106	113	7	8.67161e-47	Up-regulated
ACOX1	Pig	2.67682e-51	1.01443	294	98	9.78246e-47	Up-regulated
PLA2G4A	Pig	3.21035e-51	0.63364	0.51	245	1.17322e-46	Up-regulated
FAM13A	Pig	3.25143e-51	1.01235	634	357	1.18823e-46	Up-regulated
DCP2	Pig	4.24668e-51	1.43815	283	96	1.55195e-46	Up-regulated
HIPK3	Pig	4.5523e-51	1.15174	363	148	1.66364e-46	Up-regulated
PTBP3	Pig	6.27205e-51	0.926509	334	124	2.29212e-46	Up-regulated
FHIT	Pig	6.8264e-51	1.49397	251	78	2.49471e-46	Up-regulated
PGM3	Pig	7.86603e-51	3.08967	132	14	2.87464e-46	Up-regulated
UGDH	Pig	8.08313e-51	1.18793	259	0.08	2.95398e-46	Up-regulated
ADAM9	Pig	1.358e-50	0.578508	589	306	4.96281e-46	Up-regulated
ACBD3	Pig	1.85695e-50	1.02132	292	98	6.78622e-46	Up-regulated
CDKN1A	Pig	1.90227e-50	4.57063	104	3	6.95186e-46	Up-regulated
ASNS	Pig	2.0192e-50	1.79412	211	54	7.37917e-46	Up-regulated
TMEM131L	Pig	2.28019e-50	2.52669	173	35	8.33295e-46	Up-regulated
ITSN1	Pig	2.46e-50	1.02801	566	309	8.99007e-46	Up-regulated
NEK1	Pig	3.03504e-50	0.954044	372	148	1.10916e-45	Up-regulated
NEMP2	Pig	3.08369e-50	2.51881	159	27	1.12694e-45	Up-regulated
SPATS2L	Pig	4.19864e-50	0.865881	618	352	1.53439e-45	Up-regulated
ALPK1	Pig	4.44558e-50	1.86565	0.18	37	1.62464e-45	Up-regulated
UQCC1	Pig	4.90675e-50	1.86353	217	59	1.79317e-45	Up-regulated
KANK1	Pig	5.00307e-50	1.53258	309	121	1.82837e-45	Up-regulated
PAXBP1	Pig	5.04153e-50	1.31026	311	115	1.84243e-45	Up-regulated
WDSUB1	Pig	5.10345e-50	2.29433	157	27	1.86506e-45	Up-regulated
FILIP1L	Pig	5.18956e-50	1.18069	304	108	1.89652e-45	Up-regulated
PLEKHH2	Pig	7.91794e-50	0.616651	442	198	2.89361e-45	Up-regulated
RPL18	Pig	1.02122e-49	1.61931	189	42	3.73204e-45	Up-regulated
TTBK2	Pig	1.13941e-49	1.57286	223	61	4.16399e-45	Up-regulated
SLC25A20	Pig	1.1615e-49	2.81252	132	15	4.24471e-45	Up-regulated
LMNA	Pig	1.23012e-49	1.77184	181	38	4.49547e-45	Up-regulated
OSMR	Pig	1.25195e-49	1.15518	215	56	4.57524e-45	Up-regulated
VTI1A	Pig	1.30002e-49	0.627108	514	248	4.75091e-45	Up-regulated
GRAMD2B	Pig	1.32517e-49	5.70198	98	2	4.84283e-45	Up-regulated
NNT	Pig	1.39731e-49	1.5389	225	63	5.10646e-45	Up-regulated
NBR1	Pig	1.5292e-49	1.21954	319	0.12	5.58845e-45	Up-regulated
ARL8B	Pig	1.69479e-49	0.933701	306	108	6.19362e-45	Up-regulated
FBXO32	Pig	2.18095e-49	5.35813	93	0	7.97027e-45	Up-regulated
SRGN	Pig	2.35443e-49	4.04095	0.11	7	8.60427e-45	Up-regulated
NDRG1	Pig	2.50922e-49	1.50738	0.21	55	9.16996e-45	Up-regulated
TAF4B	Pig	2.66939e-49	2.35484	138	18	9.75528e-45	Up-regulated
PDIA5	Pig	2.69511e-49	3.94609	112	7	9.84928e-45	Up-regulated
SNX7	Pig	2.81344e-49	0.731695	464	218	1.02817e-44	Up-regulated
TRUB1	Pig	2.85728e-49	2.35952	157	27	1.04419e-44	Up-regulated
KIZ	Pig	2.85842e-49	1.56529	208	53	1.04461e-44	Up-regulated
VSTM4	Pig	2.98245e-49	1.7174	251	0.08	1.08994e-44	Up-regulated
ANXA1	Pig	3.00197e-49	0.675058	217	56	1.09707e-44	Up-regulated
POLK	Pig	3.11845e-49	1.1061	263	83	1.13964e-44	Up-regulated
FAM98A	Pig	3.12907e-49	2.91988	127	13	1.14352e-44	Up-regulated
CDK8	Pig	3.43196e-49	0.751	432	193	1.25421e-44	Up-regulated
WDR25	Pig	3.52247e-49	2.23035	158	27	1.28729e-44	Up-regulated
NEXN	Pig	4.97562e-49	5.35634	97	2	1.81834e-44	Up-regulated
ENSSSCG00000029160	Pig	5.02239e-49	3.97391	105	5	1.83543e-44	Up-regulated
NSMCE1	Pig	5.49937e-49	4.23313	102	4	2.00974e-44	Up-regulated
GATAD2B	Pig	7.12147e-49	0.905199	512	256	2.60254e-44	Up-regulated
APOE	Pig	8.449e-49	2.14383	126	13	3.08769e-44	Up-regulated
CDC42EP3	Pig	8.56956e-49	4.66822	0.1	3	3.13175e-44	Up-regulated
NXPE3	Pig	1.1386e-48	2.33586	138	19	4.16101e-44	Up-regulated
HADHB	Pig	1.21311e-48	6.4951	94	1	4.4333e-44	Up-regulated
TTC7A	Pig	1.39187e-48	1.60252	247	77	5.08657e-44	Up-regulated
GNB4	Pig	2.17179e-48	1.06019	256	0.08	7.9368e-44	Up-regulated
DUSP1	Pig	2.41067e-48	2.20873	171	35	8.8098e-44	Up-regulated
EGFLAM	Pig	2.78075e-48	2.5107	135	17	1.01623e-43	Up-regulated
RPLP1	Pig	2.82274e-48	0.527609	0.33	121	1.03157e-43	Up-regulated
EEA1	Pig	3.41737e-48	0.8618	377	158	1.24888e-43	Up-regulated
TAX1BP1	Pig	3.45841e-48	1.04457	402	0.18	1.26387e-43	Up-regulated
ENSSSCG00000026488	Pig	3.46776e-48	0.901252	347	136	1.26729e-43	Up-regulated
ETV7	Pig	3.71139e-48	4.12507	102	4	1.35633e-43	Up-regulated
DENND4A	Pig	3.82381e-48	1.28985	311	118	1.39741e-43	Up-regulated
AVEN	Pig	4.50434e-48	0.941491	298	107	1.64611e-43	Up-regulated
MBD5	Pig	4.52565e-48	0.628071	0.68	429	1.6539e-43	Up-regulated
CRACD	Pig	4.87851e-48	3.18428	134	18	1.78285e-43	Up-regulated
ASXL2	Pig	5.10016e-48	1.18857	292	105	1.86385e-43	Up-regulated
ENSSSCG00000013052	Pig	5.13981e-48	1.82069	201	52	1.87834e-43	Up-regulated
CCDC186	Pig	5.46107e-48	1.13639	289	101	1.99575e-43	Up-regulated
SSR2	Pig	5.54478e-48	1.49348	0.19	44	2.02634e-43	Up-regulated
EPB41L5	Pig	5.59717e-48	5.84184	93	1	2.04549e-43	Up-regulated
CA12	Pig	5.97266e-48	3.29192	124	13	2.18271e-43	Up-regulated
AGPS	Pig	6.24675e-48	0.866688	342	133	2.28287e-43	Up-regulated
RPS8	Pig	7.08633e-48	0.73595	293	0.1	2.5897e-43	Up-regulated
ENSSSCG00000006231	Pig	7.8891e-48	3.10612	133	18	2.88307e-43	Up-regulated
TBC1D15	Pig	1.05603e-47	1.09654	302	0.11	3.85927e-43	Up-regulated
ZCCHC7	Pig	1.07791e-47	0.638096	633	354	3.93923e-43	Up-regulated
CPEB4	Pig	1.3411e-47	1.65029	187	44	4.90106e-43	Up-regulated
TMCC1	Pig	1.39792e-47	0.639458	0.56	307	5.1087e-43	Up-regulated
EIF3H	Pig	1.58754e-47	0.905911	0.28	94	5.80166e-43	Up-regulated
CTTNBP2NL	Pig	1.63403e-47	3.23825	0.12	12	5.97158e-43	Up-regulated
ARHGAP5	Pig	1.90833e-47	0.983352	383	165	6.97397e-43	Up-regulated
NFATC1	Pig	2.19686e-47	2.51937	155	28	8.02844e-43	Up-regulated
ABCD4	Pig	2.43554e-47	2.0984	153	27	8.90067e-43	Up-regulated
CAB39L	Pig	3.01561e-47	2.45534	167	34	1.10206e-42	Up-regulated
PRKAR2A	Pig	3.62007e-47	1.18551	0.38	168	1.32296e-42	Up-regulated
LUM	Pig	3.6696e-47	0.610542	326	122	1.34106e-42	Up-regulated
GLIS3	Pig	3.74885e-47	0.619238	696	438	1.37002e-42	Up-regulated
TSHZ3	Pig	3.90831e-47	0.770011	283	98	1.42829e-42	Up-regulated
RAB10	Pig	4.47268e-47	0.979477	329	129	1.63454e-42	Up-regulated
PDLIM1	Pig	5.02764e-47	3.83366	0.11	8	1.83735e-42	Up-regulated
MIGA1	Pig	5.87199e-47	1.22067	298	109	2.14592e-42	Up-regulated
PCMTD2	Pig	6.34932e-47	3.08458	125	15	2.32036e-42	Up-regulated
PSMC6	Pig	7.60576e-47	0.79861	333	0.13	2.77953e-42	Up-regulated
CAV1	Pig	8.21108e-47	1.77232	168	35	3.00074e-42	Up-regulated
GDI2	Pig	8.38668e-47	0.957903	332	131	3.06491e-42	Up-regulated
UFSP2	Pig	9.21892e-47	1.43411	203	53	3.36905e-42	Up-regulated
ESF1	Pig	9.72844e-47	1.00441	268	89	3.55526e-42	Up-regulated
LUZP1	Pig	1.02746e-46	1.50393	241	77	3.75485e-42	Up-regulated
HIVEP1	Pig	1.13209e-46	0.626827	496	244	4.13723e-42	Up-regulated
MIF	Pig	1.40229e-46	3.26067	107	7	5.12469e-42	Up-regulated
CAVIN3	Pig	1.6739e-46	1.18209	142	22	6.11726e-42	Up-regulated
TFG	Pig	1.70538e-46	1.04293	237	71	6.23233e-42	Up-regulated
ENSSSCG00000013260	Pig	1.76771e-46	3.75206	98	4	6.4601e-42	Up-regulated
PKN2	Pig	1.97812e-46	0.751303	462	221	7.22903e-42	Up-regulated
MRS2	Pig	2.13778e-46	2.2521	139	21	7.81252e-42	Up-regulated
NECAB1	Pig	3.23796e-46	0.857797	255	83	1.18331e-41	Up-regulated
EML4	Pig	3.7366e-46	0.752818	368	154	1.36554e-41	Up-regulated
CLINT1	Pig	4.69908e-46	0.670275	353	143	1.71728e-41	Up-regulated
SNX25	Pig	5.58219e-46	2.00711	156	0.03	2.04001e-41	Up-regulated
ACVR1B	Pig	7.32862e-46	2.40495	135	0.02	2.67824e-41	Up-regulated
TCF12	Pig	7.42363e-46	0.557504	866	731	2.71297e-41	Up-regulated
SEC22A	Pig	7.9135e-46	1.16373	279	99	2.89199e-41	Up-regulated
C4A	Pig	9.25709e-46	2.71275	113	0.01	3.38301e-41	Up-regulated
ENSSSCG00000022925	Pig	1.60964e-45	5.11194	95	4	5.88242e-41	Up-regulated
BBX	Pig	1.68466e-45	0.504463	557	287	6.15661e-41	Up-regulated
CCDC180	Pig	1.77413e-45	0.910265	217	62	6.48355e-41	Up-regulated
NRBF2	Pig	1.90662e-45	1.7116	179	41	6.96775e-41	Up-regulated
IL16	Pig	1.9179e-45	0.664688	441	211	7.00897e-41	Up-regulated
FMOD	Pig	2.02962e-45	1.42334	136	0.02	7.41725e-41	Up-regulated
ENSSSCG00000025253	Pig	2.16791e-45	1.30126	268	94	7.92263e-41	Up-regulated
PCYT1A	Pig	2.42602e-45	1.16581	278	98	8.86587e-41	Up-regulated
SKAP2	Pig	2.47554e-45	5.60826	88	1	9.04685e-41	Up-regulated
WDR41	Pig	2.84041e-45	1.57823	213	61	1.03803e-40	Up-regulated
TMTC1	Pig	2.93313e-45	1.08147	334	138	1.07191e-40	Up-regulated
UCK2	Pig	3.5265e-45	3.09406	114	11	1.28876e-40	Up-regulated
HHAT	Pig	4.33519e-45	1.35134	214	61	1.5843e-40	Up-regulated
MFRP	Pig	4.33765e-45	3.34998	99	5	1.58519e-40	Up-regulated
MNAT1	Pig	4.59453e-45	0.716521	0.41	182	1.67907e-40	Up-regulated
NDFIP2	Pig	4.61178e-45	1.2395	221	64	1.68537e-40	Up-regulated
FBXW8	Pig	4.75196e-45	1.38417	247	83	1.7366e-40	Up-regulated
G3BP2	Pig	5.42148e-45	2.00812	178	42	1.98128e-40	Up-regulated
ETV4	Pig	7.39791e-45	4.6819	93	3	2.70356e-40	Up-regulated
MAPRE2	Pig	7.65253e-45	1.74643	201	56	2.79662e-40	Up-regulated
NEO1	Pig	8.05331e-45	1.05293	348	146	2.94308e-40	Up-regulated
NUFIP2	Pig	8.61688e-45	0.607724	405	181	3.14904e-40	Up-regulated
RAD23B	Pig	8.80584e-45	0.936511	0.32	125	3.21809e-40	Up-regulated
AREL1	Pig	9.73654e-45	2.01279	153	29	3.55822e-40	Up-regulated
MBNL2	Pig	1.06216e-44	0.595947	0.61	339	3.88168e-40	Up-regulated
EPC1	Pig	1.07225e-44	0.725078	559	305	3.91856e-40	Up-regulated
ADAL	Pig	1.18078e-44	2.27762	148	27	4.31518e-40	Up-regulated
GALNT5	Pig	1.4201e-44	2.66332	105	8	5.18976e-40	Up-regulated
CD2AP	Pig	1.71703e-44	1.05375	216	62	6.27487e-40	Up-regulated
PRKD1	Pig	1.76219e-44	0.543276	652	0.38	6.43992e-40	Up-regulated
GPHN	Pig	1.82481e-44	0.591812	677	437	6.66877e-40	Up-regulated
RPSA	Pig	6.76165e-44	1.00454	216	61	2.47105e-39	Up-regulated
FBXO30	Pig	7.49257e-44	1.77969	174	41	2.73816e-39	Up-regulated
CAPZA1	Pig	1.02267e-43	0.994737	303	117	3.73736e-39	Up-regulated
APC	Pig	1.07299e-43	0.828359	397	0.18	3.92124e-39	Up-regulated
C1RL	Pig	1.08792e-43	2.59653	106	9	3.97582e-39	Up-regulated
SLC35B4	Pig	1.15681e-43	9.26293	81	0	4.22756e-39	Up-regulated
THSD4	Pig	1.40101e-43	2.98279	143	27	5.12e-39	Up-regulated
WDR70	Pig	1.46376e-43	0.636981	401	178	5.3493e-39	Up-regulated
STAT3	Pig	1.70128e-43	0.710587	0.45	218	6.21733e-39	Up-regulated
TEX14	Pig	1.79151e-43	1.73669	217	66	6.54707e-39	Up-regulated
CDIN1	Pig	2.39856e-43	1.27496	0.21	61	8.76552e-39	Up-regulated
RASSF3	Pig	2.45247e-43	2.39947	144	27	8.96254e-39	Up-regulated
FAM222B	Pig	2.65429e-43	1.14132	303	119	9.70011e-39	Up-regulated
ATP6V0A1	Pig	2.65896e-43	3.28208	109	11	9.71718e-39	Up-regulated
SPIDR	Pig	3.19442e-43	0.658785	381	171	1.1674e-38	Up-regulated
ATP6V1A	Pig	3.75694e-43	3.16133	0.11	11	1.37298e-38	Up-regulated
ENPEP	Pig	4.00946e-43	1.30923	185	47	1.46526e-38	Up-regulated
ENSSSCG00000014267	Pig	4.57165e-43	0.914946	372	0.17	1.67071e-38	Up-regulated
GOLGA5	Pig	5.12331e-43	0.859584	271	97	1.87231e-38	Up-regulated
SSBP2	Pig	5.93468e-43	0.621186	705	459	2.16883e-38	Up-regulated
VCPIP1	Pig	6.10887e-43	2.46248	141	26	2.23249e-38	Up-regulated
AK4	Pig	6.9567e-43	0.871866	254	88	2.54233e-38	Up-regulated
LGALS3	Pig	7.12303e-43	1.3992	181	47	2.60311e-38	Up-regulated
LIN7A	Pig	8.03607e-43	0.716306	409	195	2.93678e-38	Up-regulated
SLC9B1	Pig	9.04388e-43	6.74553	83	1	3.30508e-38	Up-regulated
FBXO25	Pig	1.02025e-42	3.24021	109	11	3.72851e-38	Up-regulated
KATNBL1	Pig	1.02776e-42	0.965439	325	134	3.75593e-38	Up-regulated
LAMP2	Pig	1.3368e-42	0.76133	275	98	4.88535e-38	Up-regulated
CLOCK	Pig	1.3411e-42	0.717237	458	229	4.90104e-38	Up-regulated
ENSSSCG00000009523	Pig	1.34992e-42	2.83253	119	16	4.93327e-38	Up-regulated
CD47	Pig	1.43369e-42	0.698325	447	216	5.23944e-38	Up-regulated
TLR3	Pig	1.50963e-42	4.40675	89	3	5.51695e-38	Up-regulated
PTGS1	Pig	1.54317e-42	0.723119	275	0.1	5.6395e-38	Up-regulated
BCL2L13	Pig	1.79549e-42	1.3417	251	88	6.56161e-38	Up-regulated
RYK	Pig	2.08183e-42	0.642323	447	215	7.60805e-38	Up-regulated
CLMP	Pig	2.155e-42	0.624671	609	342	7.87543e-38	Up-regulated
PPP2R3C	Pig	2.30007e-42	1.44631	171	0.04	8.4056e-38	Up-regulated
PSMA3	Pig	2.4355e-42	1.12319	204	58	8.90052e-38	Up-regulated
DACT1	Pig	2.46521e-42	1.34225	148	29	9.00911e-38	Up-regulated
ZBTB44	Pig	2.9216e-42	0.837499	368	159	1.0677e-37	Up-regulated
MAPK14	Pig	3.20657e-42	1.10534	0.27	98	1.17184e-37	Up-regulated
MEMO1	Pig	3.29181e-42	0.795279	327	133	1.20299e-37	Up-regulated
CFAP20DC	Pig	4.0015e-42	1.61106	181	47	1.46235e-37	Up-regulated
SLIT2	Pig	4.21371e-42	0.560666	371	165	1.5399e-37	Up-regulated
YEATS2	Pig	4.25771e-42	1.59565	208	62	1.55598e-37	Up-regulated
ENSSSCG00000041465	Pig	4.82564e-42	0.894815	243	81	1.76353e-37	Up-regulated
PSMB2	Pig	4.91037e-42	0.884226	308	122	1.79449e-37	Up-regulated
RHOT1	Pig	5.73453e-42	1.73635	174	44	2.09568e-37	Up-regulated
TM2D1	Pig	9.49684e-42	1.2574	192	52	3.47062e-37	Up-regulated
CSRP2	Pig	9.7337e-42	1.12642	173	42	3.55718e-37	Up-regulated
PUS7	Pig	1.00847e-41	0.890176	0.27	98	3.68544e-37	Up-regulated
ABI1	Pig	1.10459e-41	0.972724	326	138	4.03672e-37	Up-regulated
N4BP1	Pig	1.20739e-41	1.00536	318	0.13	4.41241e-37	Up-regulated
KCTD9	Pig	1.33993e-41	0.817256	283	106	4.89677e-37	Up-regulated
GTF2I	Pig	1.43612e-41	0.927635	399	0.19	5.2483e-37	Up-regulated
HEATR3	Pig	1.44669e-41	0.740037	405	186	5.28691e-37	Up-regulated
KCNJ8	Pig	1.56047e-41	2.0464	0.15	31	5.70275e-37	Up-regulated
ENSSSCG00000009293	Pig	1.60884e-41	1.38196	144	28	5.87949e-37	Up-regulated
IRF7	Pig	1.74182e-41	4.09833	84	3	6.36548e-37	Up-regulated
ENSSSCG00000016823	Pig	2.07737e-41	2.42472	96	7	7.59175e-37	Up-regulated
ADAMTS1	Pig	2.08057e-41	1.35132	207	63	7.60345e-37	Up-regulated
ENSSSCG00000007001	Pig	2.0914e-41	2.29137	122	17	7.64303e-37	Up-regulated
ENSSSCG00000005453	Pig	2.13086e-41	1.5801	0.14	26	7.78724e-37	Up-regulated
MOV10	Pig	2.43357e-41	1.10964	0.18	47	8.89349e-37	Up-regulated
EGR2	Pig	3.24466e-41	2.75812	94	6	1.18576e-36	Up-regulated
PGD	Pig	5.31266e-41	3.43276	102	0.01	1.94151e-36	Up-regulated
GORASP2	Pig	5.33259e-41	1.26341	233	78	1.94879e-36	Up-regulated
MPPED2	Pig	6.60079e-41	3.65796	108	13	2.41226e-36	Up-regulated
PIK3AP1	Pig	6.60201e-41	2.38866	147	31	2.41271e-36	Up-regulated
ENSSSCG00000005241	Pig	7.0556e-41	4.55684	84	3	2.57847e-36	Up-regulated
PAPSS1	Pig	7.26166e-41	0.572794	317	129	2.65377e-36	Up-regulated
UBE2B	Pig	7.5803e-41	0.870102	0.33	138	2.77022e-36	Up-regulated
ENSSSCG00000023850	Pig	8.92934e-41	3.13417	102	0.01	3.26323e-36	Up-regulated
TNS1	Pig	9.70962e-41	0.879878	627	391	3.54838e-36	Up-regulated
PKP4	Pig	1.07996e-40	1.10433	381	189	3.94672e-36	Up-regulated
NMNAT2	Pig	1.13799e-40	2.42332	137	26	4.15879e-36	Up-regulated
MCUB	Pig	1.5199e-40	0.647835	324	135	5.55448e-36	Up-regulated
BRD8	Pig	1.58528e-40	1.96093	158	37	5.79341e-36	Up-regulated
SLC25A6	Pig	2.04026e-40	2.61312	119	17	7.45611e-36	Up-regulated
ZNF664	Pig	2.77887e-40	1.79552	165	0.04	1.01554e-35	Up-regulated
PDK1	Pig	2.98572e-40	2.25559	144	0.03	1.09113e-35	Up-regulated
GPAT4	Pig	3.26505e-40	4.15377	84	3	1.19321e-35	Up-regulated
EPG5	Pig	3.49389e-40	1.35637	222	73	1.27684e-35	Up-regulated
CPQ	Pig	3.82008e-40	0.699301	307	124	1.39605e-35	Up-regulated
ZRANB3	Pig	3.93302e-40	2.66397	117	17	1.43732e-35	Up-regulated
CAPRIN1	Pig	4.44549e-40	1.06024	293	118	1.6246e-35	Up-regulated
ITGA1	Pig	4.73327e-40	1.57879	162	39	1.72977e-35	Up-regulated
EYA3	Pig	6.17493e-40	1.2427	223	74	2.25663e-35	Up-regulated
ENSSSCG00000037274	Pig	6.60931e-40	1.0028	239	82	2.41537e-35	Up-regulated
STAM	Pig	7.54945e-40	0.535914	276	103	2.75895e-35	Up-regulated
XIAP	Pig	8.10064e-40	0.878473	307	125	2.96038e-35	Up-regulated
NMI	Pig	8.42022e-40	1.17788	175	45	3.07717e-35	Up-regulated
PHC2	Pig	9.6411e-40	0.925101	245	85	3.52334e-35	Up-regulated
DGKB	Pig	1.08042e-39	2.09273	148	33	3.94838e-35	Up-regulated
PNPLA8	Pig	1.12644e-39	1.93951	141	29	4.11659e-35	Up-regulated
GPR161	Pig	1.17871e-39	1.08392	245	87	4.3076e-35	Up-regulated
ENSSSCG00000010053	Pig	1.5792e-39	0.901847	441	222	5.77118e-35	Up-regulated
SLC22A15	Pig	1.62114e-39	1.36791	251	92	5.92446e-35	Up-regulated
HACE1	Pig	1.96299e-39	0.672039	295	117	7.17374e-35	Up-regulated
TDRD3	Pig	2.41449e-39	0.713807	381	175	8.82376e-35	Up-regulated
ARL14EP	Pig	2.8359e-39	1.41676	0.18	0.05	1.03638e-34	Up-regulated
SLC25A3	Pig	3.24843e-39	2.89379	0.1	0.01	1.18714e-34	Up-regulated
S100A11	Pig	3.71699e-39	1.2349	132	24	1.35837e-34	Up-regulated
KIF12	Pig	4.04867e-39	6.7811	74	0	1.47959e-34	Up-regulated
JKAMP	Pig	4.25093e-39	1.9989	116	17	1.5535e-34	Up-regulated
ZMYM4	Pig	4.89057e-39	0.860291	356	159	1.78726e-34	Up-regulated
YAF2	Pig	5.11227e-39	0.614627	441	218	1.86828e-34	Up-regulated
NAMPT	Pig	5.20341e-39	0.915547	262	98	1.90159e-34	Up-regulated
ENSSSCG00000039582	Pig	5.3551e-39	0.92655	198	58	1.95702e-34	Up-regulated
DHX58	Pig	5.88252e-39	4.01873	82	3	2.14977e-34	Up-regulated
ENSSSCG00000012452	Pig	6.12198e-39	0.538066	241	84	2.23728e-34	Up-regulated
MAPK10	Pig	6.39067e-39	0.576572	314	131	2.33547e-34	Up-regulated
LDLRAD4	Pig	8.79582e-39	0.61267	331	141	3.21443e-34	Up-regulated
AGL	Pig	9.84003e-39	3.73482	94	8	3.59604e-34	Up-regulated
ACO2	Pig	1.01034e-38	4.28048	86	5	3.69228e-34	Up-regulated
PRMT3	Pig	1.01138e-38	0.62461	317	131	3.69608e-34	Up-regulated
SQSTM1	Pig	1.06642e-38	0.946533	254	93	3.89725e-34	Up-regulated
GPAT3	Pig	1.20243e-38	3.07254	108	14	4.3943e-34	Up-regulated
FAM3C	Pig	1.31444e-38	0.591138	238	82	4.8036e-34	Up-regulated
HSD17B4	Pig	1.48254e-38	1.40294	202	64	5.41795e-34	Up-regulated
N6AMT1	Pig	1.69258e-38	1.55363	213	0.07	6.18552e-34	Up-regulated
WDR26	Pig	2.09143e-38	1.47011	198	62	7.64311e-34	Up-regulated
BROX	Pig	2.7324e-38	1.9999	149	34	9.98554e-34	Up-regulated
TRAF3	Pig	2.73496e-38	0.949489	214	69	9.99493e-34	Up-regulated
ATF6	Pig	2.97914e-38	0.597784	401	189	1.08873e-33	Up-regulated
CSNK1A1	Pig	3.13816e-38	0.815386	385	184	1.14684e-33	Up-regulated
ELF2	Pig	3.21107e-38	0.668217	451	229	1.17349e-33	Up-regulated
PRICKLE2	Pig	3.79683e-38	0.539942	699	462	1.38755e-33	Up-regulated
PPP4R1	Pig	3.84218e-38	1.46497	0.21	69	1.40413e-33	Up-regulated
TRAPPC13	Pig	4.39427e-38	2.34675	108	14	1.60589e-33	Up-regulated
GTF2E2	Pig	5.73048e-38	1.49819	209	0.07	2.0942e-33	Up-regulated
PTPA	Pig	5.90084e-38	2.37775	126	23	2.15646e-33	Up-regulated
B4GALT1	Pig	6.06136e-38	0.888125	257	96	2.21512e-33	Up-regulated
SUCLG2	Pig	6.3108e-38	0.654496	448	236	2.30628e-33	Up-regulated
IRS1	Pig	6.33952e-38	1.32578	219	75	2.31678e-33	Up-regulated
TBC1D5	Pig	6.35858e-38	0.532885	678	432	2.32374e-33	Up-regulated
NONO	Pig	6.92503e-38	1.32522	0.22	75	2.53075e-33	Up-regulated
MAN1A1	Pig	7.28544e-38	1.14116	209	68	2.66246e-33	Up-regulated
ANPEP	Pig	7.42178e-38	3.32223	86	6	2.71229e-33	Up-regulated
PTDSS1	Pig	8.05398e-38	9.14631	0.07	0	2.94333e-33	Up-regulated
SEC24A	Pig	9.53316e-38	0.754217	353	158	3.48389e-33	Up-regulated
SMCHD1	Pig	1.35002e-37	0.707194	456	234	4.93363e-33	Up-regulated
EED	Pig	1.42256e-37	1.60325	149	35	5.19873e-33	Up-regulated
SMAD7	Pig	1.47083e-37	1.03821	169	45	5.37516e-33	Up-regulated
MXD1	Pig	1.6278e-37	2.19136	0.13	26	5.94879e-33	Up-regulated
CD36	Pig	1.67814e-37	1.93665	204	71	6.13277e-33	Up-regulated
IP6K1	Pig	1.74762e-37	0.955834	0.42	212	6.38669e-33	Up-regulated
SOX6	Pig	1.88021e-37	0.793715	0.36	172	6.87124e-33	Up-regulated
SLC9B2	Pig	2.01958e-37	7.72046	0.07	0	7.38055e-33	Up-regulated
FAM204A	Pig	2.53025e-37	0.784979	213	69	9.24678e-33	Up-regulated
NUDT6	Pig	2.84161e-37	1.0451	252	95	1.03847e-32	Up-regulated
LEF1	Pig	3.22033e-37	4.19315	81	4	1.17687e-32	Up-regulated
SLAIN2	Pig	3.3229e-37	0.607445	393	188	1.21435e-32	Up-regulated
IMMP1L	Pig	3.58558e-37	1.06008	195	0.06	1.31035e-32	Up-regulated
EPS15	Pig	4.1457e-37	0.517047	0.59	337	1.51505e-32	Up-regulated
RALBP1	Pig	4.49104e-37	0.813861	263	101	1.64125e-32	Up-regulated
GOLPH3L	Pig	4.54344e-37	1.87494	138	0.03	1.6604e-32	Up-regulated
SLC25A17	Pig	4.70967e-37	0.69525	257	97	1.72115e-32	Up-regulated
RPL15	Pig	4.80633e-37	1.02681	156	38	1.75647e-32	Up-regulated
ACCSL	Pig	5.14167e-37	0.942352	212	0.07	1.87902e-32	Up-regulated
PMAIP1	Pig	5.41494e-37	3.99216	78	3	1.97889e-32	Up-regulated
ENSSSCG00000037595	Pig	6.12424e-37	0.878576	203	64	2.2381e-32	Up-regulated
COX10	Pig	6.79817e-37	3.97004	82	5	2.48439e-32	Up-regulated
ID2	Pig	6.91292e-37	2.47673	84	6	2.52633e-32	Up-regulated
GCC2	Pig	6.92013e-37	0.709961	347	156	2.52896e-32	Up-regulated
PLPP5	Pig	7.41651e-37	2.62937	87	7	2.71036e-32	Up-regulated
STOX2	Pig	7.82326e-37	1.40461	159	42	2.85901e-32	Up-regulated
ATP10D	Pig	1.04978e-36	0.829249	275	0.11	3.83641e-32	Up-regulated
DEPTOR	Pig	1.30142e-36	1.41161	207	69	4.75603e-32	Up-regulated
ARNTL2	Pig	1.44104e-36	1.48382	145	34	5.26628e-32	Up-regulated
TUBA1B	Pig	1.46984e-36	0.894497	0.19	57	5.37155e-32	Up-regulated
PRKCA	Pig	1.53694e-36	1.74049	167	47	5.61676e-32	Up-regulated
SRPX2	Pig	1.62906e-36	1.12791	162	42	5.95338e-32	Up-regulated
ANGPTL2	Pig	1.7537e-36	0.531874	263	101	6.40889e-32	Up-regulated
RGS22	Pig	1.87241e-36	1.49385	0.15	37	6.84274e-32	Up-regulated
ITGA10	Pig	2.18094e-36	1.26296	145	34	7.97023e-32	Up-regulated
TOM1	Pig	2.24769e-36	1.46117	177	51	8.21418e-32	Up-regulated
ENSSSCG00000007369	Pig	2.28393e-36	9.10127	67	0	8.34663e-32	Up-regulated
EFR3A	Pig	2.34373e-36	0.771434	306	129	8.56517e-32	Up-regulated
PRKACB	Pig	3.01328e-36	1.04088	211	73	1.1012e-31	Up-regulated
IFTAP	Pig	3.03683e-36	2.45904	107	16	1.10981e-31	Up-regulated
ENSSSCG00000005247	Pig	3.11831e-36	2.24839	122	23	1.13959e-31	Up-regulated
ZFYVE1	Pig	3.26186e-36	1.49233	187	58	1.19205e-31	Up-regulated
LAPTM4A	Pig	3.31194e-36	0.800613	211	0.07	1.21035e-31	Up-regulated
TMEM59	Pig	3.37621e-36	1.15447	183	54	1.23384e-31	Up-regulated
TRIQK	Pig	3.42611e-36	0.659747	187	57	1.25207e-31	Up-regulated
SORCS2	Pig	3.83012e-36	3.31307	86	7	1.39972e-31	Up-regulated
SHQ1	Pig	4.18898e-36	1.17197	144	33	1.53086e-31	Up-regulated
STOM	Pig	4.19332e-36	2.75038	108	17	1.53245e-31	Up-regulated
TPM3	Pig	5.4529e-36	2.47031	114	0.02	1.99276e-31	Up-regulated
NAV2	Pig	6.01794e-36	0.855031	528	331	2.19926e-31	Up-regulated
ERAP1	Pig	6.69656e-36	2.75751	95	11	2.44726e-31	Up-regulated
PHACTR1	Pig	6.83905e-36	1.81154	138	32	2.49933e-31	Up-regulated
SUPT3H	Pig	7.18505e-36	0.793481	328	149	2.62578e-31	Up-regulated
USP9X	Pig	7.91563e-36	0.690556	401	197	2.89277e-31	Up-regulated
AGPAT3	Pig	8.24824e-36	1.57155	196	64	3.01432e-31	Up-regulated
HNMT	Pig	8.63295e-36	0.656927	229	83	3.15491e-31	Up-regulated
XRCC5	Pig	9.59852e-36	0.718029	363	169	3.50778e-31	Up-regulated
DNAJC24	Pig	1.01141e-35	1.43883	118	21	3.69621e-31	Up-regulated
MAPK8	Pig	1.08846e-35	0.877919	285	118	3.97777e-31	Up-regulated
ARPC5	Pig	1.12272e-35	1.01709	179	53	4.10297e-31	Up-regulated
CASP3	Pig	1.1871e-35	1.00225	182	54	4.33826e-31	Up-regulated
TANC2	Pig	1.18836e-35	0.660945	366	174	4.34287e-31	Up-regulated
AKR1D1	Pig	1.20867e-35	2.37179	99	13	4.41708e-31	Up-regulated
VPS37A	Pig	1.23509e-35	1.44299	151	38	4.51363e-31	Up-regulated
GTF2A1L	Pig	1.24722e-35	0.689242	256	98	4.55798e-31	Up-regulated
HSD11B1L	Pig	1.2667e-35	1.0273	182	54	4.62915e-31	Up-regulated
YTHDC1	Pig	1.29935e-35	0.731981	423	215	4.74848e-31	Up-regulated
MPHOSPH9	Pig	1.31038e-35	0.941664	189	58	4.7888e-31	Up-regulated
LY96	Pig	1.36614e-35	2.53225	96	11	4.99256e-31	Up-regulated
CEMIP	Pig	1.42839e-35	5.45928	81	6	5.22004e-31	Up-regulated
PSMD11	Pig	1.53027e-35	1.76908	134	29	5.59236e-31	Up-regulated
RCBTB1	Pig	1.66389e-35	0.805658	0.28	115	6.0807e-31	Up-regulated
DDAH1	Pig	1.73733e-35	2.28361	126	26	6.34907e-31	Up-regulated
BAG3	Pig	1.73882e-35	3.2637	91	0.01	6.35452e-31	Up-regulated
ANKRD50	Pig	1.93419e-35	2.09594	138	32	7.06848e-31	Up-regulated
PPHLN1	Pig	1.96501e-35	0.638841	0.28	113	7.18112e-31	Up-regulated
ENSSSCG00000025224	Pig	2.0234e-35	2.89174	97	12	7.39451e-31	Up-regulated
GBF1	Pig	2.79325e-35	0.572718	487	265	1.02079e-30	Up-regulated
ENSSSCG00000039222	Pig	2.83435e-35	4.43503	75	3	1.03581e-30	Up-regulated
TYMS	Pig	2.85006e-35	4.32977	0.07	2	1.04156e-30	Up-regulated
AHCYL2	Pig	2.8951e-35	1.99768	127	27	1.05801e-30	Up-regulated
ENSSSCG00000033089	Pig	2.93049e-35	2.01401	103	15	1.07095e-30	Up-regulated
ARSK	Pig	2.99002e-35	3.07968	0.08	5	1.0927e-30	Up-regulated
MFF	Pig	3.16797e-35	0.919676	249	95	1.15773e-30	Up-regulated
ATG5	Pig	3.46439e-35	0.757716	271	109	1.26606e-30	Up-regulated
NSF	Pig	3.8342e-35	1.06562	229	84	1.40121e-30	Up-regulated
TNFSF13B	Pig	4.13055e-35	5.80239	69	1	1.50951e-30	Up-regulated
XPO6	Pig	5.13304e-35	0.846669	256	0.1	1.87587e-30	Up-regulated
CLEC16A	Pig	5.73484e-35	1.2032	242	95	2.0958e-30	Up-regulated
NSMAF	Pig	6.04648e-35	2.18604	131	29	2.20968e-30	Up-regulated
PRPF4B	Pig	6.79862e-35	0.547029	486	0.26	2.48456e-30	Up-regulated
ENSSSCG00000043835	Pig	7.14663e-35	3.66605	76	4	2.61174e-30	Up-regulated
FLI1	Pig	8.15463e-35	1.6404	169	0.05	2.98011e-30	Up-regulated
CCDC191	Pig	8.3113e-35	1.11431	199	66	3.03737e-30	Up-regulated
ZNF292	Pig	9.11557e-35	0.619426	455	239	3.33129e-30	Up-regulated
DNAJB1	Pig	1.07841e-34	3.10932	88	9	3.94104e-30	Up-regulated
EPB41L4A	Pig	1.25019e-34	1.00924	209	73	4.56882e-30	Up-regulated
ENSSSCG00000011676	Pig	1.5009e-34	1.26644	143	34	5.48504e-30	Up-regulated
CLMN	Pig	1.64393e-34	1.54939	147	37	6.00773e-30	Up-regulated
PAK2	Pig	1.79748e-34	0.62483	437	227	6.56888e-30	Up-regulated
ENSSSCG00000007188	Pig	2.02012e-34	1.70662	148	38	7.38252e-30	Up-regulated
RMND5A	Pig	2.09372e-34	1.70982	159	45	7.65151e-30	Up-regulated
PANK1	Pig	2.15515e-34	5.45269	0.07	2	7.87598e-30	Up-regulated
ENTPD1	Pig	2.22412e-34	1.93046	121	24	8.12803e-30	Up-regulated
MRAS	Pig	2.24877e-34	6.02249	66	1	8.21814e-30	Up-regulated
POU2F1	Pig	2.25928e-34	0.524751	575	333	8.25653e-30	Up-regulated
ENSSSCG00000016755	Pig	2.91429e-34	1.11054	182	57	1.06503e-29	Up-regulated
XPO7	Pig	2.96871e-34	1.17301	257	105	1.08492e-29	Up-regulated
RNGTT	Pig	3.35991e-34	0.576817	337	153	1.22788e-29	Up-regulated
ENSSSCG00000029449	Pig	3.4736e-34	6.86685	64	0	1.26943e-29	Up-regulated
NAPEPLD	Pig	3.57467e-34	2.6794	97	13	1.30636e-29	Up-regulated
SNAP23	Pig	4.10585e-34	1.4608	167	0.05	1.50048e-29	Up-regulated
SORT1	Pig	4.74727e-34	9.0842	63	0	1.73489e-29	Up-regulated
SDHC	Pig	4.89569e-34	2.69838	104	17	1.78913e-29	Up-regulated
KDELR2	Pig	4.93027e-34	1.00726	187	0.06	1.80177e-29	Up-regulated
ENSSSCG00000041731	Pig	4.96702e-34	1.22684	136	32	1.8152e-29	Up-regulated
TMEM241	Pig	5.30676e-34	2.7533	89	0.01	1.93936e-29	Up-regulated
ERCC6	Pig	5.75762e-34	2.49693	103	16	2.10412e-29	Up-regulated
ENSSSCG00000008222	Pig	5.9388e-34	1.09445	209	74	2.17034e-29	Up-regulated
EXOC5	Pig	6.37124e-34	0.747295	338	158	2.32837e-29	Up-regulated
PAFAH1B1	Pig	7.76961e-34	0.590946	555	322	2.8394e-29	Up-regulated
HSPA5	Pig	7.922e-34	1.5222	131	0.03	2.89509e-29	Up-regulated
PRKAR1A	Pig	8.00497e-34	1.16262	192	64	2.92542e-29	Up-regulated
PSMF1	Pig	8.47284e-34	0.975466	234	89	3.0964e-29	Up-regulated
ZNF277	Pig	8.49636e-34	1.07748	214	77	3.105e-29	Up-regulated
SCAMP1	Pig	1.03442e-33	0.750447	244	94	3.78028e-29	Up-regulated
ZNF326	Pig	1.04611e-33	0.582949	351	164	3.823e-29	Up-regulated
IP6K2	Pig	1.08227e-33	1.06426	0.15	0.04	3.95516e-29	Up-regulated
GPBP1L1	Pig	1.10135e-33	0.909649	235	0.09	4.02489e-29	Up-regulated
ERP44	Pig	1.36324e-33	0.629616	288	122	4.98196e-29	Up-regulated
H2AJ	Pig	1.40365e-33	1.54477	114	21	5.12965e-29	Up-regulated
FAF1	Pig	1.44284e-33	0.576023	542	0.32	5.27287e-29	Up-regulated
OXSR1	Pig	1.48712e-33	1.43035	184	61	5.4347e-29	Up-regulated
ANKFY1	Pig	1.58809e-33	0.647698	458	245	5.80369e-29	Up-regulated
RCHY1	Pig	1.68732e-33	1.41639	163	47	6.16631e-29	Up-regulated
ENSSSCG00000051054	Pig	1.83875e-33	3.10755	105	18	6.71972e-29	Up-regulated
RPLP0	Pig	1.87024e-33	1.35369	129	29	6.83478e-29	Up-regulated
NARS2	Pig	2.03207e-33	0.979427	188	61	7.42621e-29	Up-regulated
TMEM164	Pig	2.189e-33	2.74319	73	4	7.99969e-29	Up-regulated
PDSS2	Pig	2.20078e-33	0.981305	171	51	8.04275e-29	Up-regulated
MCC	Pig	2.38149e-33	0.710285	377	188	8.70315e-29	Up-regulated
ENSSSCG00000006324	Pig	2.43389e-33	1.56019	136	33	8.89464e-29	Up-regulated
ZNF146	Pig	2.68259e-33	0.825141	0.28	119	9.80351e-29	Up-regulated
3,00 DKK	Pig	2.76248e-33	0.992618	228	86	1.00955e-28	Up-regulated
SAV1	Pig	2.80435e-33	2.7217	98	14	1.02485e-28	Up-regulated
UHRF2	Pig	3.10528e-33	1.00247	239	94	1.13483e-28	Up-regulated
SDC2	Pig	3.22139e-33	0.779282	427	235	1.17726e-28	Up-regulated
TMTC2	Pig	3.27211e-33	1.42519	373	205	1.19579e-28	Up-regulated
SLC39A11	Pig	3.28492e-33	0.586818	303	133	1.20048e-28	Up-regulated
AKIRIN1	Pig	3.30148e-33	1.34451	156	44	1.20652e-28	Up-regulated
KCTD1	Pig	3.30456e-33	4.86551	68	2	1.20765e-28	Up-regulated
SERTAD4	Pig	3.49594e-33	9.28364	61	0	1.27759e-28	Up-regulated
PIP4K2A	Pig	3.55412e-33	0.584992	344	162	1.29885e-28	Up-regulated
CTNNB1	Pig	3.85643e-33	0.662488	356	173	1.40933e-28	Up-regulated
C6orf62	Pig	3.89782e-33	1.36462	178	57	1.42446e-28	Up-regulated
CALCOCO1	Pig	4.07556e-33	2.92407	105	18	1.48941e-28	Up-regulated
LRRC17	Pig	4.08742e-33	1.37352	149	0.04	1.49375e-28	Up-regulated
IL13RA1	Pig	4.12876e-33	1.34956	199	0.07	1.50886e-28	Up-regulated
ABCC1	Pig	4.35491e-33	3.0012	96	14	1.5915e-28	Up-regulated
BTBD10	Pig	4.48013e-33	0.740298	208	73	1.63726e-28	Up-regulated
SLC12A6	Pig	4.53066e-33	1.34352	201	73	1.65573e-28	Up-regulated
LPIN2	Pig	4.89686e-33	2.79171	93	13	1.78956e-28	Up-regulated
ENSSSCG00000016646	Pig	5.12626e-33	2.62313	105	18	1.87339e-28	Up-regulated
SELENOF	Pig	5.6597e-33	1.10359	144	37	2.06834e-28	Up-regulated
SMAP2	Pig	5.82693e-33	2.78861	93	13	2.12945e-28	Up-regulated
ZMYM6	Pig	5.85266e-33	0.566891	263	107	2.13886e-28	Up-regulated
PPP1R12A	Pig	6.06207e-33	0.510659	631	406	2.21538e-28	Up-regulated
TRMT11	Pig	7.31742e-33	1.10275	0.17	51	2.67415e-28	Up-regulated
MYO10	Pig	8.28972e-33	0.674699	272	115	3.02948e-28	Up-regulated
TTF2	Pig	8.67636e-33	1.43428	132	31	3.17078e-28	Up-regulated
HMG20A	Pig	8.68149e-33	0.879948	231	88	3.17265e-28	Up-regulated
CBL	Pig	8.89698e-33	0.765084	297	131	3.2514e-28	Up-regulated
PSMA5	Pig	1.01614e-32	1.68657	117	24	3.71349e-28	Up-regulated
PRKDC	Pig	1.10711e-32	0.803913	271	115	4.04592e-28	Up-regulated
NFXL1	Pig	1.18222e-32	0.64116	142	36	4.32044e-28	Up-regulated
ZNF462	Pig	1.23915e-32	0.734694	419	225	4.52848e-28	Up-regulated
RAB2A	Pig	1.27458e-32	0.575175	457	247	4.65793e-28	Up-regulated
PRUNE1	Pig	1.3214e-32	9.05091	0.06	0	4.82905e-28	Up-regulated
ENSSSCG00000002266	Pig	1.34013e-32	0.58034	514	305	4.89752e-28	Up-regulated
ACSS2	Pig	1.48947e-32	2.797	95	14	5.44326e-28	Up-regulated
IMMT	Pig	1.52587e-32	1.0976	209	77	5.57629e-28	Up-regulated
PCMT1	Pig	1.5618e-32	0.875551	223	84	5.70761e-28	Up-regulated
ZNF385D	Pig	1.57609e-32	0.765742	0.21	77	5.75982e-28	Up-regulated
DDX24	Pig	1.67574e-32	1.28913	153	43	6.12399e-28	Up-regulated
AUH	Pig	1.82873e-32	0.626852	0.47	266	6.68311e-28	Up-regulated
EZR	Pig	1.87875e-32	6.47807	61	0	6.86588e-28	Up-regulated
CFL1	Pig	1.96912e-32	1.32492	101	16	7.19616e-28	Up-regulated
DPP7	Pig	1.97945e-32	1.53736	144	38	7.2339e-28	Up-regulated
GRB2	Pig	1.98451e-32	1.12911	183	0.06	7.25239e-28	Up-regulated
RIPK2	Pig	2.20312e-32	0.876584	233	0.09	8.0513e-28	Up-regulated
DPYSL2	Pig	2.3253e-32	0.554011	407	209	8.49781e-28	Up-regulated
GLUD1	Pig	2.45847e-32	1.5198	128	0.03	8.98448e-28	Up-regulated
STAG2	Pig	2.4763e-32	0.66621	386	198	9.04964e-28	Up-regulated
EXOC1	Pig	2.50306e-32	0.717012	0.31	141	9.14744e-28	Up-regulated
PLK2	Pig	2.55515e-32	5.11704	67	3	9.3378e-28	Up-regulated
CRPPA	Pig	2.80396e-32	1.50805	173	56	1.02471e-27	Up-regulated
GLB1	Pig	3.10257e-32	2.8006	94	14	1.13383e-27	Up-regulated
LPGAT1	Pig	3.794e-32	1.46953	156	46	1.38652e-27	Up-regulated
RHOD	Pig	3.84413e-32	4.23617	69	3	1.40484e-27	Up-regulated
HERPUD1	Pig	4.06451e-32	1.06169	205	74	1.48538e-27	Up-regulated
TMED9	Pig	4.13079e-32	1.828	104	18	1.5096e-27	Up-regulated
ENSSSCG00000021200	Pig	4.19272e-32	0.610242	0.33	154	1.53223e-27	Up-regulated
AFAP1	Pig	4.37293e-32	1.10188	256	108	1.59809e-27	Up-regulated
DROSHA	Pig	4.43166e-32	0.606969	223	83	1.61955e-27	Up-regulated
LPIN1	Pig	4.59421e-32	2.77229	95	14	1.67895e-27	Up-regulated
RFLNB	Pig	4.65303e-32	4.02291	64	2	1.70045e-27	Up-regulated
XPNPEP1	Pig	4.77034e-32	0.59271	209	75	1.74332e-27	Up-regulated
SEC22B	Pig	6.03724e-32	0.710586	187	62	2.20631e-27	Up-regulated
RAB5A	Pig	6.68758e-32	0.932746	222	84	2.44398e-27	Up-regulated
ATP8B1	Pig	7.39123e-32	1.35021	155	46	2.70112e-27	Up-regulated
TMEM106C	Pig	8.59369e-32	1.69105	0.12	27	3.14056e-27	Up-regulated
PANK2	Pig	1.05779e-31	1.45014	154	45	3.86571e-27	Up-regulated
UNC93B1	Pig	1.06714e-31	3.33691	81	8	3.89988e-27	Up-regulated
PRRC1	Pig	1.14556e-31	0.80266	256	106	4.18644e-27	Up-regulated
SMARCC1	Pig	1.1541e-31	0.718898	354	173	4.21766e-27	Up-regulated
TMEM165	Pig	1.18534e-31	1.48982	128	0.03	4.33182e-27	Up-regulated
CTIF	Pig	1.24848e-31	0.895394	307	147	4.56257e-27	Up-regulated
ENSSSCG00000012202	Pig	1.25541e-31	7.61989	59	0	4.58788e-27	Up-regulated
METAP1D	Pig	1.28354e-31	1.83457	132	34	4.69069e-27	Up-regulated
PSME4	Pig	1.31083e-31	0.523591	539	322	4.79044e-27	Up-regulated
SHPRH	Pig	1.42512e-31	0.727216	232	0.09	5.20811e-27	Up-regulated
VLDLR	Pig	1.45417e-31	3.20051	87	11	5.31425e-27	Up-regulated
MITF	Pig	1.4603e-31	0.551483	652	435	5.33665e-27	Up-regulated
RBM15	Pig	1.47412e-31	1.51724	0.12	27	5.38716e-27	Up-regulated
ITGBL1	Pig	1.48428e-31	0.966373	243	101	5.4243e-27	Up-regulated
DNAJB6	Pig	1.53706e-31	1.18644	185	64	5.61718e-27	Up-regulated
ZFAND6	Pig	1.64531e-31	0.572711	332	153	6.01279e-27	Up-regulated
LARS2	Pig	1.89471e-31	1.53961	163	51	6.9242e-27	Up-regulated
NUP37	Pig	2.05596e-31	1.60835	143	0.04	7.5135e-27	Up-regulated
C1QTNF1	Pig	2.10902e-31	1.08301	134	34	7.70741e-27	Up-regulated
ENSSSCG00000007088	Pig	2.5104e-31	1.8624	113	24	9.17425e-27	Up-regulated
PPP2R5E	Pig	2.56782e-31	0.572537	444	239	9.38411e-27	Up-regulated
ENSSSCG00000027907	Pig	2.57566e-31	5.19707	63	2	9.41276e-27	Up-regulated
FNIP2	Pig	2.91695e-31	1.09057	246	103	1.066e-26	Up-regulated
ANKRD10	Pig	3.379e-31	0.672647	463	263	1.23486e-26	Up-regulated
MRTFB	Pig	3.44251e-31	0.70715	403	221	1.25807e-26	Up-regulated
TSPO	Pig	3.53593e-31	1.41642	98	16	1.29221e-26	Up-regulated
GPC5	Pig	3.6504e-31	2.39156	105	0.02	1.33404e-26	Up-regulated
NFIL3	Pig	3.65251e-31	9.21077	57	0	1.33481e-26	Up-regulated
CNKSR2	Pig	3.65251e-31	9.21513	57	0	1.33481e-26	Up-regulated
ENSSSCG00000028345	Pig	4.0093e-31	1.19581	159	48	1.4652e-26	Up-regulated
NPC2	Pig	4.15121e-31	1.59369	0.1	17	1.51706e-26	Up-regulated
CANX	Pig	4.26055e-31	0.653986	245	99	1.55702e-26	Up-regulated
SEC61A1	Pig	4.61566e-31	1.1638	142	38	1.68679e-26	Up-regulated
TXNL1	Pig	4.81931e-31	1.33789	166	53	1.76122e-26	Up-regulated
BTG1	Pig	5.0705e-31	1.43156	132	34	1.85301e-26	Up-regulated
ENSSSCG00000031661	Pig	5.178e-31	4.2784	66	3	1.8923e-26	Up-regulated
SMYD2	Pig	5.40287e-31	3.39336	79	8	1.97448e-26	Up-regulated
MINPP1	Pig	6.13982e-31	2.02361	107	21	2.2438e-26	Up-regulated
PTPN2	Pig	7.08497e-31	0.746961	246	101	2.5892e-26	Up-regulated
USP45	Pig	7.43977e-31	2.46616	92	14	2.71886e-26	Up-regulated
LRIG1	Pig	7.96615e-31	0.829243	301	145	2.91123e-26	Up-regulated
ITIH4	Pig	8.13816e-31	3.1016	68	4	2.97409e-26	Up-regulated
SHISA5	Pig	8.85851e-31	0.663031	179	59	3.23734e-26	Up-regulated
ANGPT4	Pig	8.86086e-31	1.46547	98	17	3.2382e-26	Up-regulated
USP53	Pig	9.53847e-31	0.857498	397	217	3.48583e-26	Up-regulated
PPME1	Pig	1.01544e-30	1.37194	172	57	3.71092e-26	Up-regulated
ICAM2	Pig	1.02594e-30	1.19819	172	56	3.74928e-26	Up-regulated
PIK3C2A	Pig	1.13406e-30	0.534721	0.45	245	4.14444e-26	Up-regulated
CAT	Pig	1.20795e-30	1.26926	192	0.07	4.41446e-26	Up-regulated
TMEM39A	Pig	1.22391e-30	0.72401	235	94	4.47279e-26	Up-regulated
GOLM1	Pig	1.27608e-30	1.4846	119	27	4.66345e-26	Up-regulated
PRSS55	Pig	1.3536e-30	0.524931	399	205	4.94672e-26	Up-regulated
ZNF697	Pig	1.37524e-30	9.03019	56	0	5.0258e-26	Up-regulated
PLXNA2	Pig	1.41831e-30	1.80785	129	33	5.18322e-26	Up-regulated
MGAT4A	Pig	1.57593e-30	2.33247	86	11	5.75925e-26	Up-regulated
F2RL2	Pig	1.60319e-30	0.874911	118	26	5.85887e-26	Up-regulated
SLC39A10	Pig	1.73922e-30	1.37427	152	46	6.356e-26	Up-regulated
SLC36A1	Pig	1.77368e-30	1.69827	124	0.03	6.4819e-26	Up-regulated
TCAF1	Pig	1.80505e-30	4.34415	65	3	6.59657e-26	Up-regulated
PLAT	Pig	1.9568e-30	1.17374	109	22	7.15111e-26	Up-regulated
TRIM44	Pig	2.00276e-30	0.538573	354	175	7.31909e-26	Up-regulated
AP4E1	Pig	2.06899e-30	0.988568	178	0.06	7.56113e-26	Up-regulated
RETREG3	Pig	2.07364e-30	1.6283	122	29	7.57811e-26	Up-regulated
MID2	Pig	2.13269e-30	1.36077	156	48	7.79393e-26	Up-regulated
HOGA1	Pig	2.27523e-30	6.71292	58	1	8.31482e-26	Up-regulated
S100A10	Pig	2.30043e-30	0.891285	127	31	8.4069e-26	Up-regulated
DHX57	Pig	2.31152e-30	1.16854	147	42	8.44743e-26	Up-regulated
DGKI	Pig	2.4477e-30	6.14052	58	1	8.94513e-26	Up-regulated
AGTPBP1	Pig	2.5313e-30	3.91399	69	5	9.25065e-26	Up-regulated
ARHGAP35	Pig	2.709e-30	0.827433	349	178	9.90005e-26	Up-regulated
TTC39C	Pig	2.76159e-30	2.57542	82	0.01	1.00922e-25	Up-regulated
PCCB	Pig	2.88821e-30	0.740306	173	57	1.0555e-25	Up-regulated
ORC3	Pig	3.29746e-30	0.70679	225	88	1.20506e-25	Up-regulated
PLEKHA5	Pig	3.43311e-30	0.577774	632	418	1.25463e-25	Up-regulated
FAM91A1	Pig	3.51451e-30	1.16461	189	67	1.28438e-25	Up-regulated
KRT10	Pig	3.72423e-30	2.28071	82	0.01	1.36102e-25	Up-regulated
PTP4A2	Pig	3.92668e-30	0.669321	0.32	153	1.43501e-25	Up-regulated
KLHL29	Pig	4.04912e-30	0.578914	301	0.14	1.47975e-25	Up-regulated
HK2	Pig	4.08861e-30	5.87847	62	2	1.49418e-25	Up-regulated
EFL1	Pig	4.55404e-30	0.697819	231	92	1.66428e-25	Up-regulated
ADH5	Pig	5.23758e-30	1.6711	107	22	1.91407e-25	Up-regulated
OLFML2B	Pig	5.27178e-30	5.27478	58	1	1.92657e-25	Up-regulated
MARCHF3	Pig	5.80727e-30	1.27376	266	126	2.12227e-25	Up-regulated
CD9	Pig	7.04345e-30	2.5075	73	7	2.57403e-25	Up-regulated
RHOBTB1	Pig	9.96427e-30	2.66028	0.09	14	3.64144e-25	Up-regulated
MFSD6	Pig	1.00269e-29	9.02876	54	0	3.66435e-25	Up-regulated
PTPN21	Pig	1.02455e-29	0.90788	253	0.11	3.74422e-25	Up-regulated
MAVS	Pig	1.04271e-29	4.59803	62	3	3.81059e-25	Up-regulated
IKBKB	Pig	1.05034e-29	1.2021	169	57	3.83846e-25	Up-regulated
TPK1	Pig	1.07019e-29	1.38371	151	47	3.91102e-25	Up-regulated
NFYA	Pig	1.10723e-29	1.67312	108	23	4.04636e-25	Up-regulated
SLC35B3	Pig	1.18113e-29	0.6254	199	73	4.31645e-25	Up-regulated
DDI1	Pig	1.20506e-29	2.15996	82	0.01	4.40387e-25	Up-regulated
SYNJ1	Pig	1.21159e-29	0.820038	0.21	81	4.42774e-25	Up-regulated
PFN1	Pig	1.30152e-29	2.58172	72	7	4.75639e-25	Up-regulated
FHL1	Pig	1.3325e-29	1.25347	178	64	4.86961e-25	Up-regulated
LMO7	Pig	1.44161e-29	6.12116	56	0	5.26836e-25	Up-regulated
WIPI1	Pig	1.44836e-29	0.815692	243	101	5.29301e-25	Up-regulated
SNX6	Pig	1.47785e-29	0.894729	219	88	5.4008e-25	Up-regulated
HDAC1	Pig	1.6036e-29	1.8218	0.11	24	5.86037e-25	Up-regulated
PPP2R5C	Pig	1.67928e-29	0.90971	307	149	6.13692e-25	Up-regulated
DOCK4	Pig	1.69702e-29	1.32288	213	89	6.20174e-25	Up-regulated
SRPRB	Pig	1.70003e-29	0.916218	0.14	39	6.21278e-25	Up-regulated
ENSSSCG00000039009	Pig	1.70032e-29	4.34569	0.07	6	6.21383e-25	Up-regulated
PPARA	Pig	1.79621e-29	2.72427	93	16	6.56424e-25	Up-regulated
ARHGEF26	Pig	1.80661e-29	0.624926	213	82	6.60226e-25	Up-regulated
SIL1	Pig	1.96772e-29	0.769481	0.2	74	7.19103e-25	Up-regulated
ENSSSCG00000043930	Pig	2.30403e-29	1.6443	146	44	8.42008e-25	Up-regulated
ENSSSCG00000004024	Pig	2.55602e-29	2.99027	68	5	9.34098e-25	Up-regulated
GRK3	Pig	3.08387e-29	4.00401	65	4	1.127e-24	Up-regulated
CITED2	Pig	3.17855e-29	4.01334	66	4	1.1616e-24	Up-regulated
GFPT1	Pig	3.21929e-29	0.933384	199	75	1.17649e-24	Up-regulated
ALG14	Pig	3.6404e-29	0.936949	149	45	1.33038e-24	Up-regulated
DNM3	Pig	3.6627e-29	0.544491	209	81	1.33853e-24	Up-regulated
MPC2	Pig	3.93041e-29	2.48002	76	8	1.43637e-24	Up-regulated
ENSSSCG00000016868	Pig	4.07254e-29	3.09616	67	5	1.48831e-24	Up-regulated
LCORL	Pig	4.17851e-29	1.2562	157	51	1.52704e-24	Up-regulated
RAB18	Pig	4.28571e-29	0.523765	297	136	1.56621e-24	Up-regulated
SSR4	Pig	4.60557e-29	0.897714	0.09	14	1.6831e-24	Up-regulated
SLC47A1	Pig	4.86491e-29	0.733766	181	64	1.77788e-24	Up-regulated
FAM162A	Pig	4.93597e-29	2.48537	95	17	1.80385e-24	Up-regulated
SNX9	Pig	5.41562e-29	0.58303	565	345	1.97914e-24	Up-regulated
NRXN1	Pig	5.454e-29	1.52999	207	85	1.99316e-24	Up-regulated
STK40	Pig	5.61682e-29	5.90043	59	2	2.05267e-24	Up-regulated
PTK7	Pig	5.72843e-29	0.594005	0.18	63	2.09345e-24	Up-regulated
COMT	Pig	5.99444e-29	2.6054	93	17	2.19067e-24	Up-regulated
CAV2	Pig	6.45201e-29	2.55704	0.08	0.01	2.35789e-24	Up-regulated
CTTN	Pig	6.93529e-29	0.68663	218	86	2.5345e-24	Up-regulated
ENSSSCG00000034802	Pig	7.53271e-29	4.71638	56	1	2.75283e-24	Up-regulated
TIA1	Pig	7.70176e-29	0.633735	336	165	2.81461e-24	Up-regulated
ENSSSCG00000022295	Pig	7.73095e-29	1.3071	141	41	2.82527e-24	Up-regulated
ENSSSCG00000009072	Pig	7.80719e-29	1.50431	123	31	2.85314e-24	Up-regulated
KIAA0319L	Pig	7.96998e-29	0.663855	287	132	2.91263e-24	Up-regulated
DDX21	Pig	8.02779e-29	0.87755	157	0.05	2.93376e-24	Up-regulated
TRIM26	Pig	8.18395e-29	0.864121	141	41	2.99082e-24	Up-regulated
AKR1B1	Pig	8.60902e-29	0.764278	201	76	3.14616e-24	Up-regulated
DENND1B	Pig	1.06822e-28	0.750032	319	155	3.90379e-24	Up-regulated
ELP3	Pig	1.09659e-28	1.12021	149	45	4.0075e-24	Up-regulated
LRRIQ3	Pig	1.38203e-28	1.13218	0.14	0.04	5.05061e-24	Up-regulated
GOLPH3	Pig	1.50316e-28	0.787049	208	0.08	5.4933e-24	Up-regulated
INTS9	Pig	1.52161e-28	0.949958	0.15	47	5.56071e-24	Up-regulated
PUS10	Pig	1.58685e-28	1.08233	165	55	5.79914e-24	Up-regulated
OLFML3	Pig	1.6328e-28	2.57553	83	12	5.96705e-24	Up-regulated
LIPG	Pig	1.64234e-28	1.18711	119	0.03	6.00194e-24	Up-regulated
PHF6	Pig	1.71723e-28	1.23634	0.13	35	6.27561e-24	Up-regulated
CCDC50	Pig	1.8064e-28	1.03569	207	82	6.60148e-24	Up-regulated
NCK2	Pig	1.89172e-28	0.969961	202	78	6.91329e-24	Up-regulated
SLC35A5	Pig	1.89587e-28	1.36014	119	0.03	6.92846e-24	Up-regulated
NUDT3	Pig	1.93249e-28	0.538338	302	145	7.06228e-24	Up-regulated
ASH1L	Pig	2.07945e-28	0.555651	681	455	7.59937e-24	Up-regulated
TET2	Pig	2.14688e-28	0.733056	342	177	7.84579e-24	Up-regulated
FOXK1	Pig	2.24818e-28	1.07591	216	88	8.21599e-24	Up-regulated
INPP1	Pig	2.44566e-28	2.57861	82	12	8.93766e-24	Up-regulated
SCYL2	Pig	2.49103e-28	0.707751	183	65	9.10347e-24	Up-regulated
ACSL1	Pig	2.53759e-28	5.93025	54	1	9.27361e-24	Up-regulated
SCARB2	Pig	2.5658e-28	0.628855	293	136	9.3767e-24	Up-regulated
CHPT1	Pig	2.57368e-28	6.0563	54	1	9.40551e-24	Up-regulated
ATG13	Pig	2.82182e-28	0.811607	245	104	1.03124e-23	Up-regulated
CUX1	Pig	3.04639e-28	0.907994	285	139	1.1133e-23	Up-regulated
DCTN4	Pig	3.07069e-28	0.56695	272	123	1.12218e-23	Up-regulated
PCGF5	Pig	3.26631e-28	0.789606	216	88	1.19367e-23	Up-regulated
PRMT9	Pig	3.38014e-28	1.87762	93	17	1.23527e-23	Up-regulated
PEX7	Pig	3.38453e-28	0.748475	166	56	1.23688e-23	Up-regulated
CASTOR2	Pig	3.64812e-28	3.85662	71	7	1.3332e-23	Up-regulated
NKD1	Pig	4.17023e-28	0.514831	359	186	1.52401e-23	Up-regulated
PRKD3	Pig	4.17107e-28	0.585903	391	205	1.52432e-23	Up-regulated
BAALC	Pig	4.39262e-28	3.86525	64	4	1.60528e-23	Up-regulated
KLF10	Pig	4.49944e-28	1.63373	82	12	1.64432e-23	Up-regulated
WDR48	Pig	4.55071e-28	0.988735	192	72	1.66306e-23	Up-regulated
OXR1	Pig	4.85385e-28	1.10878	193	74	1.77384e-23	Up-regulated
ENOX2	Pig	5.02745e-28	0.830779	0.13	35	1.83728e-23	Up-regulated
RNF11	Pig	5.58143e-28	1.15008	153	49	2.03973e-23	Up-regulated
EXOG	Pig	5.5988e-28	2.73104	83	13	2.04608e-23	Up-regulated
CCDC126	Pig	6.00798e-28	1.34947	101	0.02	2.19562e-23	Up-regulated
BMPR1A	Pig	6.01324e-28	0.510998	0.53	317	2.19754e-23	Up-regulated
EPRS1	Pig	6.41351e-28	0.744787	213	85	2.34382e-23	Up-regulated
HSP90B1	Pig	6.41622e-28	0.736294	172	59	2.34481e-23	Up-regulated
PLXNA4	Pig	7.31675e-28	0.902465	477	0.3	2.67391e-23	Up-regulated
H3-5	Pig	7.46227e-28	0.883306	0.26	118	2.72709e-23	Up-regulated
ENSSSCG00000010401	Pig	7.91981e-28	1.00399	165	56	2.89429e-23	Up-regulated
MORF4L2	Pig	8.38877e-28	0.766742	198	76	3.06568e-23	Up-regulated
UBE2W	Pig	8.56584e-28	0.760786	283	135	3.13039e-23	Up-regulated
EPN2	Pig	9.60709e-28	2.22505	111	27	3.51091e-23	Up-regulated
WT1	Pig	9.63385e-28	5.66898	53	1	3.52069e-23	Up-regulated
PPP1R13B	Pig	9.77071e-28	5.50843	53	1	3.57071e-23	Up-regulated
ARPC2	Pig	1.05699e-27	0.563199	259	115	3.86277e-23	Up-regulated
PPP1R14B	Pig	1.13128e-27	3.02732	63	4	4.13427e-23	Up-regulated
HIBCH	Pig	1.13794e-27	1.86008	0.1	21	4.15859e-23	Up-regulated
ACTA2	Pig	1.15438e-27	2.71432	77	0.01	4.21867e-23	Up-regulated
UEVLD	Pig	1.17503e-27	1.06532	166	57	4.29416e-23	Up-regulated
CWF19L2	Pig	1.32732e-27	0.546052	231	96	4.85068e-23	Up-regulated
RUFY1	Pig	1.39405e-27	0.712833	256	114	5.09454e-23	Up-regulated
KPNA3	Pig	1.45208e-27	1.18693	203	83	5.30661e-23	Up-regulated
MED12L	Pig	1.4847e-27	0.773659	161	54	5.42585e-23	Up-regulated
RNF152	Pig	1.50589e-27	3.85409	0.06	3	5.50326e-23	Up-regulated
MFSD12	Pig	1.59832e-27	3.64368	64	5	5.84105e-23	Up-regulated
TSKU	Pig	1.63214e-27	1.35594	0.11	26	5.96466e-23	Up-regulated
HLTF	Pig	1.6584e-27	0.931461	161	54	6.06062e-23	Up-regulated
ADNP	Pig	1.66061e-27	0.561326	0.29	135	6.06871e-23	Up-regulated
KLF8	Pig	2.05444e-27	1.48872	104	23	7.50794e-23	Up-regulated
PROS1	Pig	2.08907e-27	1.17082	163	57	7.63452e-23	Up-regulated
PSMB8	Pig	2.15355e-27	3.74659	57	2	7.87013e-23	Up-regulated
GPR63	Pig	2.22732e-27	0.692411	148	47	8.13974e-23	Up-regulated
ENSSSCG00000013366	Pig	2.78207e-27	1.85691	77	0.01	1.01671e-22	Up-regulated
AZIN2	Pig	2.89295e-27	2.34146	76	0.01	1.05723e-22	Up-regulated
OSTC	Pig	2.91626e-27	1.51565	84	13	1.06575e-22	Up-regulated
SEC13	Pig	3.45492e-27	0.607946	225	94	1.2626e-22	Up-regulated
C11orf49	Pig	3.69465e-27	0.814485	159	54	1.35021e-22	Up-regulated
NPSR1	Pig	3.94338e-27	1.70138	131	38	1.44111e-22	Up-regulated
DERL1	Pig	4.08482e-27	1.20635	167	0.06	1.4928e-22	Up-regulated
COBLL1	Pig	4.20984e-27	0.609212	215	88	1.53848e-22	Up-regulated
CTNNBL1	Pig	4.23246e-27	0.685861	265	121	1.54675e-22	Up-regulated
DAD1	Pig	4.7188e-27	0.764498	94	18	1.72448e-22	Up-regulated
FGD6	Pig	4.95154e-27	4.84721	53	1	1.80954e-22	Up-regulated
LIPA	Pig	5.12473e-27	0.620696	179	66	1.87283e-22	Up-regulated
VPS50	Pig	5.14567e-27	0.534032	274	126	1.88049e-22	Up-regulated
WDFY1	Pig	6.0864e-27	1.41322	152	51	2.22427e-22	Up-regulated
SLC16A1	Pig	6.11191e-27	3.20873	68	7	2.2336e-22	Up-regulated
BGN	Pig	6.63344e-27	1.99274	75	0.01	2.42419e-22	Up-regulated
CFAP100	Pig	7.02993e-27	3.81582	63	5	2.56909e-22	Up-regulated
GPI	Pig	7.29383e-27	1.14464	204	85	2.66553e-22	Up-regulated
TMED10	Pig	7.39802e-27	0.607542	216	88	2.7036e-22	Up-regulated
CYP2R1	Pig	7.63718e-27	2.3008	0.07	8	2.79101e-22	Up-regulated
DLST	Pig	7.66012e-27	1.23845	141	44	2.79939e-22	Up-regulated
RPS3	Pig	8.1263e-27	0.778273	155	51	2.96976e-22	Up-regulated
ENSSSCG00000038594	Pig	8.34678e-27	4.07822	66	7	3.05033e-22	Up-regulated
COMMD3	Pig	8.39276e-27	1.67817	0.1	22	3.06714e-22	Up-regulated
ERAP2	Pig	8.46809e-27	2.01036	68	7	3.09466e-22	Up-regulated
MCU	Pig	8.58861e-27	0.669539	277	131	3.13871e-22	Up-regulated
PARP3	Pig	1.02227e-26	5.30565	54	2	3.73588e-22	Up-regulated
ENSSSCG00000012102	Pig	1.03361e-26	0.92626	311	0.16	3.77732e-22	Up-regulated
NIPAL3	Pig	1.04801e-26	3.91146	63	5	3.82995e-22	Up-regulated
PIK3CB	Pig	1.09556e-26	1.65754	128	37	4.00373e-22	Up-regulated
BORCS5	Pig	1.15407e-26	0.819674	211	86	4.21755e-22	Up-regulated
ENTPD7	Pig	1.18304e-26	0.719271	116	0.03	4.32343e-22	Up-regulated
PIGK	Pig	1.37036e-26	1.89249	91	17	5.00799e-22	Up-regulated
CDC42EP5	Pig	1.53274e-26	1.55471	73	9	5.6014e-22	Up-regulated
ALDH1L2	Pig	1.61919e-26	0.713664	203	82	5.91732e-22	Up-regulated
HSP90AB1	Pig	1.70351e-26	1.82661	0.09	17	6.22549e-22	Up-regulated
KLF3	Pig	1.70961e-26	0.677209	0.24	106	6.24779e-22	Up-regulated
NINL	Pig	1.84975e-26	1.09905	0.14	44	6.75991e-22	Up-regulated
INTS13	Pig	1.85396e-26	3.99406	58	3	6.77531e-22	Up-regulated
IL17D	Pig	1.88061e-26	0.527142	225	96	6.8727e-22	Up-regulated
FAM118B	Pig	2.09741e-26	1.53758	94	19	7.665e-22	Up-regulated
LSS	Pig	2.25161e-26	3.79182	64	6	8.22851e-22	Up-regulated
ARPC1B	Pig	2.29363e-26	1.41187	103	24	8.38208e-22	Up-regulated
AEBP1	Pig	2.36462e-26	0.618226	149	48	8.64149e-22	Up-regulated
GIPC1	Pig	2.44564e-26	1.56384	93	19	8.9376e-22	Up-regulated
ENSSSCG00000014909	Pig	2.58385e-26	1.77616	99	22	9.44269e-22	Up-regulated
EMILIN1	Pig	2.67895e-26	0.987968	128	37	9.79024e-22	Up-regulated
NAA16	Pig	2.74064e-26	0.643921	248	111	1.00157e-21	Up-regulated
GRIA3	Pig	2.7666e-26	9.002	48	0	1.01105e-21	Up-regulated
DAPK3	Pig	2.80719e-26	2.83236	76	11	1.02589e-21	Up-regulated
EVA1A	Pig	2.8208e-26	3.08323	64	6	1.03086e-21	Up-regulated
TTC33	Pig	2.90337e-26	1.04678	162	57	1.06103e-21	Up-regulated
COL16A1	Pig	3.25178e-26	0.610317	234	102	1.18836e-21	Up-regulated
ANGPTL4	Pig	3.43926e-26	1.35676	87	16	1.25688e-21	Up-regulated
TMED3	Pig	3.60867e-26	2.21075	65	6	1.31879e-21	Up-regulated
SHLD1	Pig	3.74948e-26	1.30679	0.17	64	1.37025e-21	Up-regulated
COQ8A	Pig	3.79129e-26	3.53754	64	6	1.38553e-21	Up-regulated
NR2C2	Pig	3.87849e-26	0.687363	259	119	1.41739e-21	Up-regulated
ENSSSCG00000041764	Pig	3.91265e-26	6.23755	49	0	1.42988e-21	Up-regulated
ME2	Pig	4.18683e-26	2.04076	0.1	23	1.53008e-21	Up-regulated
ARFGEF2	Pig	4.22878e-26	0.996109	219	96	1.54541e-21	Up-regulated
CALHM5	Pig	4.27995e-26	1.37986	84	14	1.56411e-21	Up-regulated
PPFIBP2	Pig	4.35778e-26	2.28895	0.1	23	1.59255e-21	Up-regulated
PSAP	Pig	5.05058e-26	0.742319	0.22	94	1.84573e-21	Up-regulated
GOLGA3	Pig	5.08546e-26	0.647104	195	77	1.85848e-21	Up-regulated
ATG4A	Pig	5.34499e-26	8.47374	47	0	1.95333e-21	Up-regulated
SNAI2	Pig	5.61231e-26	0.941836	0.12	33	2.05102e-21	Up-regulated
ATP11C	Pig	5.69455e-26	0.879464	198	81	2.08107e-21	Up-regulated
SEPTIN11	Pig	6.02126e-26	1.12372	149	51	2.20047e-21	Up-regulated
SLC7A2	Pig	6.04993e-26	4.40438	56	3	2.21095e-21	Up-regulated
TAB2	Pig	6.08847e-26	0.569076	283	134	2.22503e-21	Up-regulated
ZNF16	Pig	6.12241e-26	0.815479	229	0.1	2.23744e-21	Up-regulated
TMEM245	Pig	6.44475e-26	0.555296	308	154	2.35524e-21	Up-regulated
ENSSSCG00000033987	Pig	6.60669e-26	0.740237	229	99	2.41441e-21	Up-regulated
HECA	Pig	6.72076e-26	1.05516	182	0.07	2.4561e-21	Up-regulated
VWA8	Pig	7.52315e-26	0.731714	207	86	2.74933e-21	Up-regulated
ASAH1	Pig	7.56626e-26	1.52641	104	24	2.76509e-21	Up-regulated
EXTL3	Pig	7.66261e-26	2.82547	66	7	2.8003e-21	Up-regulated
IRF2BP2	Pig	7.68655e-26	2.40679	92	19	2.80905e-21	Up-regulated
ZC4H2	Pig	7.71997e-26	2.11378	81	13	2.82126e-21	Up-regulated
CMTM4	Pig	9.3776e-26	2.40083	82	14	3.42704e-21	Up-regulated
ATG4C	Pig	1.00988e-25	1.10487	146	48	3.69062e-21	Up-regulated
CALR	Pig	1.13896e-25	0.655091	157	54	4.16233e-21	Up-regulated
ADSS2	Pig	1.15676e-25	1.70145	105	25	4.22737e-21	Up-regulated
DCX	Pig	1.18211e-25	0.946231	138	44	4.32001e-21	Up-regulated
CCDC39	Pig	1.20004e-25	1.11197	94	0.02	4.38555e-21	Up-regulated
RMDN1	Pig	1.23116e-25	0.725675	157	55	4.49928e-21	Up-regulated
SELENOI	Pig	1.24736e-25	5.09779	51	1	4.55847e-21	Up-regulated
CBX5	Pig	1.28937e-25	0.720916	143	46	4.71202e-21	Up-regulated
UBXN2A	Pig	1.29933e-25	0.559501	217	91	4.74839e-21	Up-regulated
RPL3	Pig	1.37201e-25	0.534427	131	39	5.01403e-21	Up-regulated
VCAM1	Pig	1.61785e-25	0.502448	186	72	5.91241e-21	Up-regulated
ANKS1B	Pig	1.73368e-25	1.76164	104	26	6.33574e-21	Up-regulated
CTSD	Pig	1.83651e-25	1.65361	89	17	6.71152e-21	Up-regulated
ZNF260	Pig	1.93197e-25	1.8882	107	27	7.06039e-21	Up-regulated
NIM1K	Pig	1.99352e-25	8.58988	46	0	7.28532e-21	Up-regulated
LMBRD1	Pig	2.06616e-25	0.739413	194	77	7.55079e-21	Up-regulated
ENSSSCG00000049961	Pig	2.18993e-25	0.632159	179	68	8.00311e-21	Up-regulated
ARMH3	Pig	2.20821e-25	0.654705	274	131	8.06991e-21	Up-regulated
SFXN1	Pig	2.39538e-25	0.527578	151	51	8.7539e-21	Up-regulated
SERF2	Human	2.43785e-25	1.58726	69	8	8.90914e-21	Up-regulated
IFIT2	Pig	2.51536e-25	2.21869	61	5	9.19239e-21	Up-regulated
ENSSSCG00000015011	Pig	2.51742e-25	0.674784	204	84	9.1999e-21	Up-regulated
PTGER4	Pig	2.80366e-25	6.42137	47	0	1.0246e-20	Up-regulated
GOSR1	Pig	2.89671e-25	0.67355	236	105	1.0586e-20	Up-regulated
MLKL	Pig	3.28679e-25	0.894573	95	0.02	1.20116e-20	Up-regulated
MSH3	Pig	3.29083e-25	0.740157	0.19	76	1.20264e-20	Up-regulated
SELENOP	Pig	3.36944e-25	0.747108	326	173	1.23136e-20	Up-regulated
CCDC88A	Pig	3.48029e-25	0.536564	318	163	1.27187e-20	Up-regulated
MARF1	Pig	3.51507e-25	0.917295	192	78	1.28458e-20	Up-regulated
TEX9	Pig	3.75295e-25	1.33433	151	53	1.37152e-20	Up-regulated
TPI1	Pig	3.86716e-25	2.36172	73	0.01	1.41325e-20	Up-regulated
BIRC3	Pig	4.29778e-25	0.668505	256	0.12	1.57062e-20	Up-regulated
ZFYVE26	Pig	4.47396e-25	1.20007	163	61	1.63501e-20	Up-regulated
P3H1	Pig	4.48078e-25	0.675435	214	91	1.6375e-20	Up-regulated
ZC3H14	Pig	4.57846e-25	0.52106	277	132	1.6732e-20	Up-regulated
CALCOCO2	Pig	4.98181e-25	0.523895	302	0.15	1.8206e-20	Up-regulated
SPPL2A	Pig	5.17527e-25	0.893046	161	58	1.8913e-20	Up-regulated
MAGT1	Pig	5.19085e-25	0.530932	246	112	1.897e-20	Up-regulated
HSPH1	Pig	5.84464e-25	0.830848	104	25	2.13592e-20	Up-regulated
RAB32	Pig	5.84655e-25	1.15404	183	74	2.13662e-20	Up-regulated
METTL15	Pig	6.30388e-25	0.763601	187	74	2.30375e-20	Up-regulated
IPO7	Pig	6.34621e-25	0.519149	241	109	2.31922e-20	Up-regulated
SLC35A1	Pig	6.3607e-25	0.636828	0.17	63	2.32452e-20	Up-regulated
UGCG	Pig	6.93752e-25	2.24453	89	19	2.53532e-20	Up-regulated
MB21D2	Pig	7.11541e-25	1.56354	107	27	2.60033e-20	Up-regulated
TUBA8	Pig	7.42782e-25	8.34231	45	0	2.7145e-20	Up-regulated
PRR14L	Pig	8.07593e-25	0.580243	269	128	2.95135e-20	Up-regulated
SUCLG1	Pig	8.44066e-25	0.95928	186	75	3.08464e-20	Up-regulated
WWP1	Pig	8.77301e-25	0.604835	0.33	174	3.2061e-20	Up-regulated
UBAP1	Pig	9.14045e-25	0.682328	211	0.09	3.34038e-20	Up-regulated
ST6GAL2	Pig	9.15196e-25	1.65096	79	13	3.34458e-20	Up-regulated
XKR6	Pig	9.26556e-25	1.31817	142	48	3.3861e-20	Up-regulated
ENSSSCG00000036812	Pig	9.66113e-25	1.27655	197	83	3.53066e-20	Up-regulated
HELB	Pig	9.79425e-25	1.11407	127	39	3.57931e-20	Up-regulated
TRMT9B	Pig	9.81138e-25	1.79755	106	28	3.58557e-20	Up-regulated
CHL1	Pig	1.01471e-24	2.28514	68	9	3.70827e-20	Up-regulated
ANKRD42	Pig	1.0636e-24	0.922891	166	61	3.88694e-20	Up-regulated
USP14	Pig	1.0927e-24	0.656047	199	82	3.99327e-20	Up-regulated
HERPUD2	Pig	1.12962e-24	0.73932	216	93	4.12821e-20	Up-regulated
ENSSSCG00000012916	Pig	1.13787e-24	3.10247	59	5	4.15835e-20	Up-regulated
RWDD3	Pig	1.17378e-24	1.48185	101	25	4.28959e-20	Up-regulated
ENSSSCG00000020686	Pig	1.35069e-24	1.88869	0.1	24	4.93611e-20	Up-regulated
RAB9A	Pig	1.36057e-24	0.945311	206	88	4.97221e-20	Up-regulated
ABRAXAS2	Pig	1.37982e-24	2.51	79	14	5.04256e-20	Up-regulated
AP1B1	Pig	1.43325e-24	8.4056	45	0	5.23781e-20	Up-regulated
VEGFA	Pig	1.43325e-24	8.72961	45	0	5.23781e-20	Up-regulated
ENSSSCG00000023158	Pig	1.48436e-24	1.00233	108	28	5.42458e-20	Up-regulated
EMC2	Pig	1.56782e-24	0.638732	282	0.14	5.72959e-20	Up-regulated
ACADM	Pig	1.63215e-24	1.40534	129	41	5.9647e-20	Up-regulated
MED24	Pig	1.66088e-24	2.50669	77	13	6.06967e-20	Up-regulated
HIPK2	Pig	1.68697e-24	0.679408	181	71	6.16503e-20	Up-regulated
LAMP1	Pig	1.81489e-24	1.49932	114	32	6.63253e-20	Up-regulated
TSGA10	Pig	1.90611e-24	1.47728	99	24	6.96587e-20	Up-regulated
NOC3L	Pig	1.92011e-24	0.596482	157	56	7.01706e-20	Up-regulated
CTSS	Pig	1.94829e-24	1.81024	77	13	7.12003e-20	Up-regulated
VTA1	Pig	2.14611e-24	0.694098	208	89	7.84295e-20	Up-regulated
TBPL1	Pig	2.16098e-24	1.01482	122	36	7.89729e-20	Up-regulated
NDUFS4	Pig	2.25039e-24	0.675311	234	107	8.22404e-20	Up-regulated
SLC38A10	Pig	2.31564e-24	0.762263	0.18	71	8.46249e-20	Up-regulated
GFOD2	Pig	2.44246e-24	2.2029	75	12	8.92596e-20	Up-regulated
REL	Pig	2.4596e-24	1.80308	102	26	8.98863e-20	Up-regulated
ACER3	Pig	2.49295e-24	0.627759	506	0.32	9.11048e-20	Up-regulated
SPATA6L	Pig	2.51008e-24	6.1948	47	1	9.17307e-20	Up-regulated
TRIT1	Pig	2.51271e-24	0.89633	184	74	9.1827e-20	Up-regulated
KIAA0930	Pig	2.56046e-24	2.18952	93	21	9.35721e-20	Up-regulated
FKBP15	Pig	2.5831e-24	1.14751	169	65	9.43993e-20	Up-regulated
FKBP7	Pig	2.61769e-24	1.78552	79	14	9.56635e-20	Up-regulated
RPS16	Pig	2.62613e-24	0.823278	0.13	0.04	9.5972e-20	Up-regulated
IDH3A	Pig	2.62653e-24	4.47837	52	3	9.59866e-20	Up-regulated
STC2	Pig	2.76488e-24	8.42681	44	0	1.01043e-19	Up-regulated
SLCO5A1	Pig	2.76488e-24	8.35469	44	0	1.01043e-19	Up-regulated
FCHSD2	Pig	2.80659e-24	0.813833	213	95	1.02567e-19	Up-regulated
ENSSSCG00000031381	Pig	2.93359e-24	1.38074	93	21	1.07208e-19	Up-regulated
TGFB3	Pig	3.05038e-24	2.31069	59	5	1.11476e-19	Up-regulated
GNPTAB	Pig	3.20236e-24	0.601346	209	0.09	1.1703e-19	Up-regulated
TDG	Pig	3.26412e-24	1.30933	109	29	1.19287e-19	Up-regulated
ABHD5	Pig	3.26733e-24	4.10136	53	3	1.19405e-19	Up-regulated
SYPL1	Pig	4.02003e-24	0.970265	147	51	1.46912e-19	Up-regulated
EMP3	Pig	4.02451e-24	0.839495	0.11	0.03	1.47076e-19	Up-regulated
SPEN	Pig	4.6031e-24	0.652458	386	216	1.6822e-19	Up-regulated
PLK4	Pig	5.03627e-24	1.37666	126	0.04	1.8405e-19	Up-regulated
CLCA1	Pig	5.04898e-24	5.78184	46	1	1.84515e-19	Up-regulated
CAMK2G	Pig	5.20677e-24	2.48491	71	11	1.90281e-19	Up-regulated
DTNA	Pig	5.33245e-24	8.18792	44	0	1.94874e-19	Up-regulated
SLC39A7	Pig	5.3898e-24	1.02835	72	11	1.9697e-19	Up-regulated
ENSSSCG00000013318	Pig	5.83673e-24	0.729977	137	45	2.13303e-19	Up-regulated
DLAT	Pig	5.90883e-24	2.25423	77	13	2.15938e-19	Up-regulated
PLAA	Pig	5.95582e-24	0.621768	214	93	2.17655e-19	Up-regulated
THY1	Pig	6.31284e-24	1.11299	98	24	2.30703e-19	Up-regulated
ARHGDIB	Pig	6.42675e-24	1.79829	69	0.01	2.34866e-19	Up-regulated
PDHA1	Pig	6.53364e-24	3.80795	57	5	2.38772e-19	Up-regulated
ABL2	Pig	6.54513e-24	0.802771	272	135	2.39192e-19	Up-regulated
LMCD1	Pig	6.7429e-24	3.39508	52	3	2.46419e-19	Up-regulated
GAS6	Pig	6.94441e-24	2.08216	0.09	0.02	2.53783e-19	Up-regulated
MAP3K13	Pig	6.99876e-24	0.524764	219	96	2.5577e-19	Up-regulated
TRIM24	Pig	7.06059e-24	0.834026	231	107	2.58029e-19	Up-regulated
CDK1	Pig	7.26914e-24	3.1799	61	7	2.65651e-19	Up-regulated
MAP2K1	Pig	7.64029e-24	1.13253	129	41	2.79215e-19	Up-regulated
PEX14	Pig	8.06276e-24	0.680969	0.19	78	2.94654e-19	Up-regulated
ADM	Pig	8.38891e-24	1.27838	86	18	3.06573e-19	Up-regulated
ASB3	Pig	8.46664e-24	0.682347	202	86	3.09413e-19	Up-regulated
RHEB	Pig	8.57251e-24	0.675401	274	135	3.13282e-19	Up-regulated
GRK5	Pig	8.84029e-24	0.719128	0.26	129	3.23068e-19	Up-regulated
ENSSSCG00000038708	Pig	8.85642e-24	1.05748	126	0.04	3.23658e-19	Up-regulated
ENSSSCG00000004945	Pig	8.96023e-24	0.960451	102	26	3.27452e-19	Up-regulated
KLHDC3	Pig	9.15521e-24	1.87176	94	22	3.34577e-19	Up-regulated
SCRN3	Pig	9.20342e-24	0.590193	128	0.04	3.36339e-19	Up-regulated
EIF3A	Pig	9.55269e-24	0.541151	225	0.1	3.49103e-19	Up-regulated
TOMM70	Pig	9.71054e-24	1.14321	146	51	3.54872e-19	Up-regulated
UBTD1	Pig	1.01819e-23	2.1784	95	23	3.72098e-19	Up-regulated
SEC61B	Pig	1.02292e-23	2.91688	58	5	3.73826e-19	Up-regulated
TOB1	Human	1.02819e-23	8.09848	43	0	3.75751e-19	Up-regulated
NOCT	Pig	1.13159e-23	4.47549	54	4	4.1354e-19	Up-regulated
CARNMT1	Pig	1.13253e-23	1.89327	87	19	4.13882e-19	Up-regulated
SCAMP2	Pig	1.2521e-23	3.1525	66	9	4.5758e-19	Up-regulated
MBIP	Pig	1.25811e-23	0.821337	129	41	4.59776e-19	Up-regulated
ILRUN	Pig	1.27046e-23	0.607469	294	148	4.64291e-19	Up-regulated
KLF2	Pig	1.31804e-23	1.97649	71	11	4.81678e-19	Up-regulated
STK10	Pig	1.33491e-23	0.964903	165	64	4.87845e-19	Up-regulated
ANKRD33B	Pig	1.38177e-23	0.837452	223	103	5.04967e-19	Up-regulated
NAA20	Pig	1.43362e-23	2.24475	81	16	5.23917e-19	Up-regulated
BZW2	Pig	1.50667e-23	1.83692	89	0.02	5.50612e-19	Up-regulated
TRAK2	Pig	1.6103e-23	1.91792	95	23	5.88484e-19	Up-regulated
ADIPOR2	Pig	1.61713e-23	2.22791	73	12	5.90979e-19	Up-regulated
RASL11B	Pig	1.66792e-23	3.23426	57	5	6.0954e-19	Up-regulated
ENSSSCG00000008984	Pig	1.98205e-23	8.9636	43	0	7.2434e-19	Up-regulated
ALDH1A1	Pig	2.05265e-23	0.97008	151	55	7.50141e-19	Up-regulated
ARRDC2	Pig	2.30759e-23	2.65909	68	0.01	8.43308e-19	Up-regulated
SPCS2	Pig	2.308e-23	1.36677	118	36	8.43458e-19	Up-regulated
POFUT1	Pig	2.37391e-23	0.800977	155	57	8.67544e-19	Up-regulated
NFYC	Pig	2.40644e-23	0.792802	215	98	8.79435e-19	Up-regulated
STX6	Pig	2.41522e-23	1.38053	121	37	8.82641e-19	Up-regulated
RAD52	Pig	2.59676e-23	0.660124	203	88	9.48987e-19	Up-regulated
GXYLT1	Pig	2.67991e-23	1.17381	95	23	9.79373e-19	Up-regulated
DAB2IP	Pig	2.70237e-23	1.69332	126	41	9.8758e-19	Up-regulated
ITM2C	Pig	2.74177e-23	1.0009	94	22	1.00198e-18	Up-regulated
SH3GL1	Pig	2.79705e-23	1.21404	119	36	1.02218e-18	Up-regulated
TMX3	Pig	2.87192e-23	0.522602	143	0.05	1.04954e-18	Up-regulated
SPOP	Pig	2.87495e-23	0.656839	247	117	1.05065e-18	Up-regulated
BNIP3	Pig	3.07394e-23	1.39884	146	53	1.12337e-18	Up-regulated
ODF2L	Pig	3.14632e-23	0.639656	136	46	1.14982e-18	Up-regulated
HSPBAP1	Pig	3.19298e-23	1.01902	112	32	1.16687e-18	Up-regulated
NGLY1	Pig	3.2701e-23	0.634916	181	73	1.19506e-18	Up-regulated
BAG4	Pig	3.28383e-23	1.46271	114	34	1.20008e-18	Up-regulated
COPB1	Pig	3.36931e-23	0.506474	0.22	98	1.23131e-18	Up-regulated
TBC1D8B	Pig	3.53192e-23	0.549607	136	46	1.29074e-18	Up-regulated
ERMP1	Pig	3.62899e-23	2.54013	69	0.01	1.32621e-18	Up-regulated
TMEM120B	Pig	3.6482e-23	4.70417	0.05	3	1.33323e-18	Up-regulated
GM2A	Pig	3.81993e-23	8.15605	42	0	1.39599e-18	Up-regulated
WARS1	Pig	3.9009e-23	1.52327	88	0.02	1.42558e-18	Up-regulated
GSTCD	Pig	3.95806e-23	0.585171	107	0.03	1.44647e-18	Up-regulated
FUBP1	Pig	4.79258e-23	0.502283	308	0.16	1.75145e-18	Up-regulated
IGFBP2	Pig	5.07785e-23	5.59603	47	2	1.8557e-18	Up-regulated
OMA1	Pig	5.12179e-23	1.83153	95	24	1.87176e-18	Up-regulated
NSUN3	Pig	5.32332e-23	1.32328	0.12	37	1.94541e-18	Up-regulated
TMCO4	Pig	5.45292e-23	0.967873	95	24	1.99277e-18	Up-regulated
IDE	Pig	5.58588e-23	0.713167	234	0.11	2.04136e-18	Up-regulated
ZFY	Pig	5.80025e-23	0.602326	277	139	2.1197e-18	Up-regulated
BPNT1	Pig	5.81905e-23	3.16903	55	5	2.12657e-18	Up-regulated
MTX2	Pig	5.89402e-23	0.728207	183	75	2.15397e-18	Up-regulated
CASP6	Pig	5.9494e-23	1.33388	121	38	2.17421e-18	Up-regulated
ALDH18A1	Pig	6.62207e-23	0.974261	148	54	2.42004e-18	Up-regulated
ENSSSCG00000026996	Pig	7.24684e-23	2.23877	0.09	21	2.64836e-18	Up-regulated
ANKH	Pig	7.36027e-23	8.81034	41	0	2.68981e-18	Up-regulated
ENSSSCG00000022842	Pig	7.45659e-23	1.94592	59	7	2.72501e-18	Up-regulated
TWSG1	Pig	7.63425e-23	0.944849	0.16	61	2.78994e-18	Up-regulated
ENSSSCG00000015313	Pig	8.23448e-23	0.510309	227	103	3.00929e-18	Up-regulated
SDHD	Pig	8.72521e-23	3.87269	52	4	3.18863e-18	Up-regulated
ENSSSCG00000015083	Pig	9.18268e-23	0.900038	115	34	3.35581e-18	Up-regulated
UBE2O	Pig	9.21624e-23	1.42787	129	43	3.36807e-18	Up-regulated
TNFAIP8	Pig	9.53405e-23	3.3565	63	8	3.48422e-18	Up-regulated
IFT74	Pig	9.57249e-23	0.543434	155	58	3.49827e-18	Up-regulated
CAVIN1	Pig	1.0166e-22	1.40574	115	35	3.71517e-18	Up-regulated
TAF8	Pig	1.03825e-22	1.10169	157	0.06	3.79427e-18	Up-regulated
UXS1	Pig	1.14205e-22	1.16274	132	45	4.17364e-18	Up-regulated
SGCD	Pig	1.15578e-22	2.26344	56	5	4.22378e-18	Up-regulated
CEPT1	Pig	1.22238e-22	1.4385	107	0.03	4.46719e-18	Up-regulated
TNIK	Pig	1.44566e-22	1.56529	153	61	5.28316e-18	Up-regulated
CCDC148	Pig	1.52053e-22	1.67829	88	0.02	5.55677e-18	Up-regulated
TUBD1	Pig	1.60514e-22	3.91296	0.05	3	5.86598e-18	Up-regulated
DNAJC15	Pig	1.7905e-22	1.06033	101	27	6.54339e-18	Up-regulated
CCDC90B	Pig	2.03544e-22	0.640192	154	57	7.43852e-18	Up-regulated
FMR1	Pig	2.17604e-22	0.721597	0.25	122	7.95235e-18	Up-regulated
RPL36AL	Pig	2.18333e-22	1.21354	78	15	7.97898e-18	Up-regulated
SLC8A1	Pig	2.32429e-22	0.631975	226	0.11	8.49413e-18	Up-regulated
ATP5F1C	Pig	2.44246e-22	2.11672	81	17	8.92596e-18	Up-regulated
CPT2	Pig	2.47969e-22	0.782161	151	57	9.06202e-18	Up-regulated
TMEM176A	Pig	2.70346e-22	4.57463	43	1	9.8798e-18	Up-regulated
CLEC11A	Pig	2.77245e-22	3.56336	43	1	1.01319e-17	Up-regulated
SPECC1	Pig	2.87526e-22	3.74018	48	3	1.05076e-17	Up-regulated
TMEM168	Pig	2.97784e-22	0.616552	212	95	1.08825e-17	Up-regulated
SLC30A6	Pig	3.1809e-22	1.01352	128	43	1.16246e-17	Up-regulated
HADH	Pig	3.20802e-22	1.30322	135	48	1.17237e-17	Up-regulated
ARSL	Pig	3.44744e-22	0.907143	187	0.08	1.25987e-17	Up-regulated
ENSSSCG00000010172	Pig	3.48555e-22	0.979794	188	83	1.27379e-17	Up-regulated
CENPH	Pig	3.49579e-22	2.41895	0.06	7	1.27753e-17	Up-regulated
JMY	Pig	3.51389e-22	0.829884	187	0.08	1.28415e-17	Up-regulated
MAP2	Pig	3.59127e-22	1.651	78	16	1.31243e-17	Up-regulated
C8orf88	Pig	3.68396e-22	1.17949	82	17	1.3463e-17	Up-regulated
TEAD4	Pig	3.69874e-22	6.76536	41	0	1.3517e-17	Up-regulated
ENSSSCG00000006395	Pig	3.70594e-22	1.0635	95	24	1.35434e-17	Up-regulated
EMSY	Pig	3.777e-22	0.838578	184	78	1.38031e-17	Up-regulated
ACAD10	Pig	4.67832e-22	1.74315	108	33	1.70969e-17	Up-regulated
ENSSSCG00000008183	Pig	5.08855e-22	4.01765	43	1	1.85961e-17	Up-regulated
GLCCI1	Pig	5.27886e-22	0.585885	159	62	1.92916e-17	Up-regulated
N4BP2	Pig	5.30501e-22	0.859179	237	114	1.93872e-17	Up-regulated
EIF2B3	Pig	5.72372e-22	0.970598	188	82	2.09173e-17	Up-regulated
FKBP14	Pig	5.8017e-22	1.28812	68	11	2.12023e-17	Up-regulated
CDK15	Pig	6.01882e-22	2.8252	63	9	2.19958e-17	Up-regulated
CDC40	Pig	6.07766e-22	1.28549	112	34	2.22108e-17	Up-regulated
LOXL2	Pig	6.56855e-22	0.615045	314	173	2.40048e-17	Up-regulated
ENSSSCG00000049158	Pig	6.60774e-22	1.02345	217	103	2.4148e-17	Up-regulated
TMEM178B	Pig	6.68428e-22	1.28908	99	27	2.44277e-17	Up-regulated
ENSSSCG00000029441	Pig	6.74048e-22	3.71059	0.05	3	2.46331e-17	Up-regulated
C9orf85	Pig	7.33636e-22	1.41257	95	25	2.68107e-17	Up-regulated
FKBP10	Pig	7.3919e-22	0.668488	0.1	27	2.70137e-17	Up-regulated
RAMP1	Pig	7.56882e-22	4.27299	41	0	2.76603e-17	Up-regulated
AR	Pig	7.75229e-22	1.05498	112	34	2.83307e-17	Up-regulated
GOLT1B	Pig	8.41851e-22	0.702273	87	0.02	3.07654e-17	Up-regulated
ALG6	Pig	8.56555e-22	0.77109	0.17	69	3.13028e-17	Up-regulated
CHPF	Pig	9.18607e-22	1.26291	79	17	3.35705e-17	Up-regulated
TARBP1	Pig	9.28887e-22	0.546759	184	78	3.39462e-17	Up-regulated
IGFBP4	Pig	9.56405e-22	0.81505	122	0.04	3.49518e-17	Up-regulated
ENSSSCG00000039004	Pig	9.62948e-22	2.28257	65	0.01	3.51909e-17	Up-regulated
KIF1C	Pig	1.00298e-21	2.65136	66	11	3.66539e-17	Up-regulated
EGLN3	Pig	1.01218e-21	8.70283	39	0	3.699e-17	Up-regulated
TTC1	Pig	1.10684e-21	0.959637	156	61	4.04494e-17	Up-regulated
L3MBTL3	Pig	1.25591e-21	0.595713	131	45	4.58972e-17	Up-regulated
CCAR1	Pig	1.26137e-21	0.686612	277	144	4.60968e-17	Up-regulated
KCNK2	Pig	1.27468e-21	1.23109	107	32	4.65831e-17	Up-regulated
ENSSSCG00000016426	Pig	1.27693e-21	0.788163	139	0.05	4.66653e-17	Up-regulated
HYOU1	Pig	1.2939e-21	2.62194	58	7	4.72855e-17	Up-regulated
USP31	Pig	1.31803e-21	0.597052	0.13	45	4.81675e-17	Up-regulated
NGF	Pig	1.36331e-21	2.24591	58	7	4.98222e-17	Up-regulated
NAA35	Pig	1.36709e-21	0.55212	237	114	4.99601e-17	Up-regulated
GYG1	Pig	1.38013e-21	2.63374	56	6	5.04369e-17	Up-regulated
ASXL1	Pig	1.43905e-21	0.586092	249	122	5.25901e-17	Up-regulated
KCNK12	Pig	1.47009e-21	4.97801	44	2	5.37244e-17	Up-regulated
MICU1	Pig	1.56987e-21	0.569413	282	147	5.7371e-17	Up-regulated
C18orf25	Pig	1.60067e-21	0.725898	222	104	5.84967e-17	Up-regulated
PPP2CA	Pig	1.60344e-21	2.251	77	16	5.85976e-17	Up-regulated
SBNO1	Pig	1.65458e-21	0.707621	0.17	0.07	6.04665e-17	Up-regulated
TFCP2	Pig	1.66529e-21	0.734108	193	85	6.08579e-17	Up-regulated
WIPI2	Pig	1.8333e-21	0.753449	205	94	6.69979e-17	Up-regulated
ELOB	Pig	1.9123e-21	1.78793	66	11	6.98848e-17	Up-regulated
TCEA3	Pig	1.94807e-21	8.27073	39	0	7.11922e-17	Up-regulated
SLC7A11	Pig	1.94807e-21	8.42988	39	0	7.11922e-17	Up-regulated
GSAP	Pig	1.94829e-21	4.04921	47	3	7.12004e-17	Up-regulated
MAP3K5	Pig	1.95662e-21	1.14606	151	0.06	7.15048e-17	Up-regulated
PTPRC	Pig	2.17903e-21	2.13178	58	7	7.96328e-17	Up-regulated
TOB2	Pig	2.24174e-21	2.75489	61	9	8.19243e-17	Up-regulated
PLGRKT	Pig	2.32993e-21	1.75517	83	19	8.51473e-17	Up-regulated
MAN2A2	Pig	2.33762e-21	1.57333	0.1	28	8.54282e-17	Up-regulated
LRRC59	Pig	2.38434e-21	1.68077	68	12	8.71355e-17	Up-regulated
LONP2	Pig	2.39587e-21	0.501194	274	0.14	8.75572e-17	Up-regulated
RGS2	Pig	2.52093e-21	3.37281	51	4	9.21274e-17	Up-regulated
RGS17	Pig	2.54339e-21	3.21844	49	3	9.29481e-17	Up-regulated
DNAJC25	Pig	2.92989e-21	0.578893	169	69	1.07073e-16	Up-regulated
COQ9	Pig	3.36638e-21	4.45811	46	3	1.23024e-16	Up-regulated
PIGU	Pig	3.46233e-21	1.18242	107	32	1.26531e-16	Up-regulated
KCNQ5	Pig	3.60092e-21	1.13077	0.19	88	1.31596e-16	Up-regulated
SLC9A1	Pig	3.60471e-21	4.12229	46	3	1.31734e-16	Up-regulated
P2RX4	Pig	3.7485e-21	8.24949	38	0	1.36989e-16	Up-regulated
TADA2A	Pig	3.76426e-21	0.735409	176	75	1.37565e-16	Up-regulated
TMEM87A	Pig	4.04785e-21	0.696965	199	0.09	1.47929e-16	Up-regulated
RBBP8	Pig	4.14229e-21	0.672078	0.13	45	1.5138e-16	Up-regulated
MSH4	Pig	4.14531e-21	0.631538	129	45	1.5149e-16	Up-regulated
SRP54	Pig	4.28322e-21	0.930886	169	0.07	1.5653e-16	Up-regulated
XPO5	Pig	4.52804e-21	0.883427	124	42	1.65477e-16	Up-regulated
ERO1B	Pig	4.83728e-21	1.01346	96	26	1.76778e-16	Up-regulated
CCNI	Pig	4.90549e-21	0.766918	155	61	1.79271e-16	Up-regulated
ENSSSCG00000009281	Pig	5.197e-21	6.37977	39	0	1.89924e-16	Up-regulated
ENSSSCG00000033649	Pig	5.40415e-21	0.64002	156	62	1.97495e-16	Up-regulated
OTULIN	Pig	5.58182e-21	1.47525	92	24	2.03988e-16	Up-regulated
MBOAT1	Pig	6.05168e-21	0.688736	166	69	2.21158e-16	Up-regulated
ARPC3	Pig	6.14053e-21	0.625696	135	48	2.24406e-16	Up-regulated
ZNF713	Pig	6.32513e-21	2.01737	72	14	2.31152e-16	Up-regulated
NOS1AP	Pig	6.57058e-21	0.535332	187	83	2.40122e-16	Up-regulated
PCDH19	Pig	6.59753e-21	0.710179	131	47	2.41107e-16	Up-regulated
PSMD7	Pig	6.63774e-21	1.1779	93	25	2.42576e-16	Up-regulated
SEC11A	Pig	6.99314e-21	0.752765	148	57	2.55564e-16	Up-regulated
CENPW	Pig	7.16632e-21	1.35148	84	0.02	2.61893e-16	Up-regulated
MMP11	Pig	7.21135e-21	8.34114	38	0	2.63539e-16	Up-regulated
ENSSSCG00000047344	Pig	7.21135e-21	8.26939	38	0	2.63539e-16	Up-regulated
CYP2B22	Pig	7.57674e-21	2.24764	62	0.01	2.76892e-16	Up-regulated
BCAR1	Pig	7.63902e-21	4.04224	49	4	2.79168e-16	Up-regulated
ATP6AP2	Pig	8.88031e-21	1.47555	0.09	24	3.24531e-16	Up-regulated
DLD	Pig	9.47446e-21	1.07521	129	46	3.46244e-16	Up-regulated
C3	Pig	9.6449e-21	1.05447	84	0.02	3.52473e-16	Up-regulated
CNP	Pig	1.00474e-20	2.40628	52	5	3.67183e-16	Up-regulated
CPSF2	Pig	1.06779e-20	1.5214	94	26	3.90223e-16	Up-regulated
PATJ	Pig	1.073e-20	1.07661	185	84	3.92128e-16	Up-regulated
NAB1	Pig	1.12603e-20	0.67537	203	93	4.11509e-16	Up-regulated
RILPL1	Pig	1.19473e-20	2.13753	74	16	4.36613e-16	Up-regulated
VOPP1	Pig	1.32454e-20	1.28303	138	52	4.84055e-16	Up-regulated
MTPAP	Pig	1.3379e-20	1.0345	134	0.05	4.88936e-16	Up-regulated
RPL22	Pig	1.3652e-20	1.40127	0.1	29	4.98911e-16	Up-regulated
PLEKHA1	Pig	1.49855e-20	1.11868	118	0.04	5.47645e-16	Up-regulated
DNMT1	Pig	1.52992e-20	3.0359	52	6	5.59108e-16	Up-regulated
DNAL1	Pig	1.55819e-20	1.40969	78	17	5.69442e-16	Up-regulated
CIAO2A	Pig	1.5968e-20	3.60647	46	3	5.83551e-16	Up-regulated
AP1G1	Pig	1.73757e-20	0.563857	307	167	6.34993e-16	Up-regulated
MAPK1IP1L	Pig	1.74422e-20	1.15821	116	38	6.37427e-16	Up-regulated
SHFL	Pig	1.81676e-20	2.07294	0.06	9	6.63933e-16	Up-regulated
ACOT11	Pig	1.97426e-20	5.49185	38	0	7.21492e-16	Up-regulated
CMTR1	Pig	1.99824e-20	0.541912	282	148	7.30257e-16	Up-regulated
CERS5	Pig	2.45017e-20	0.716163	165	69	8.95415e-16	Up-regulated
ING3	Pig	2.5265e-20	2.71655	55	7	9.2331e-16	Up-regulated
MIGA2	Pig	2.61515e-20	4.89038	39	1	9.55708e-16	Up-regulated
TMEM263	Pig	2.63714e-20	0.868847	109	34	9.63741e-16	Up-regulated
MAPKAPK3	Pig	2.64801e-20	4.20398	45	3	9.67716e-16	Up-regulated
CCDC93	Pig	2.64989e-20	0.537478	257	132	9.68402e-16	Up-regulated
ENSSSCG00000007098	Pig	2.71248e-20	0.830679	137	51	9.91275e-16	Up-regulated
UTP6	Pig	3.02394e-20	0.769604	104	31	1.1051e-15	Up-regulated
ENSSSCG00000039972	Pig	3.17521e-20	0.774826	175	76	1.16038e-15	Up-regulated
CFAP299	Pig	3.23568e-20	2.99945	53	6	1.18248e-15	Up-regulated
FGL2	Pig	3.24604e-20	2.30639	0.07	14	1.18626e-15	Up-regulated
EDEM2	Pig	3.28696e-20	1.01183	157	64	1.20122e-15	Up-regulated
NR4A2	Pig	3.36728e-20	2.71994	0.06	0.01	1.23057e-15	Up-regulated
PTP4A1	Pig	3.47128e-20	2.04127	72	15	1.26858e-15	Up-regulated
STX7	Pig	3.69057e-20	1.02489	132	0.05	1.34872e-15	Up-regulated
SLC12A7	Pig	3.82357e-20	5.19013	38	0	1.39732e-15	Up-regulated
KHNYN	Pig	3.84838e-20	0.980927	128	46	1.40639e-15	Up-regulated
GTF2A1	Pig	3.889e-20	0.857334	136	51	1.42124e-15	Up-regulated
ENSSSCG00000030801	Pig	4.39964e-20	2.02468	64	11	1.60785e-15	Up-regulated
CHORDC1	Pig	5.0123e-20	0.569823	177	77	1.83174e-15	Up-regulated
PTCD3	Pig	5.06235e-20	1.1367	96	28	1.85004e-15	Up-regulated
SERAC1	Pig	5.17415e-20	1.51644	99	0.03	1.89089e-15	Up-regulated
USP28	Pig	5.1765e-20	2.71688	53	7	1.89175e-15	Up-regulated
RNF41	Pig	5.22735e-20	1.93097	87	23	1.91033e-15	Up-regulated
TAX1BP3	Pig	5.5544e-20	3.67751	45	3	2.02985e-15	Up-regulated
ZNF251	Pig	5.58843e-20	3.84582	47	4	2.04229e-15	Up-regulated
FMO5	Pig	5.9609e-20	1.19119	66	12	2.17841e-15	Up-regulated
EEPD1	Pig	6.08504e-20	3.10547	49	5	2.22378e-15	Up-regulated
CTSV	Pig	6.09902e-20	2.24437	65	12	2.22889e-15	Up-regulated
PCDH18	Pig	6.50235e-20	1.15781	69	13	2.37628e-15	Up-regulated
GTF2IRD1	Pig	6.60301e-20	2.66934	0.06	0.01	2.41307e-15	Up-regulated
IL18	Pig	6.74402e-20	0.719413	78	18	2.4646e-15	Up-regulated
NRG4	Pig	7.01023e-20	6.57645	37	0	2.56189e-15	Up-regulated
GBP2	Pig	7.22588e-20	0.878992	125	45	2.6407e-15	Up-regulated
CERCAM	Pig	7.53864e-20	0.616686	106	34	2.755e-15	Up-regulated
P4HB	Pig	7.59109e-20	0.837667	118	0.04	2.77416e-15	Up-regulated
MEF2C	Pig	7.63022e-20	0.539092	189	87	2.78847e-15	Up-regulated
FSTL3	Pig	8.69407e-20	1.43466	75	17	3.17725e-15	Up-regulated
DPP3	Pig	8.85722e-20	1.86141	63	11	3.23687e-15	Up-regulated
GPX8	Pig	8.86613e-20	0.720941	95	27	3.24013e-15	Up-regulated
TNIP1	Pig	9.27487e-20	1.86636	76	17	3.3895e-15	Up-regulated
CRACDL	Pig	9.85698e-20	8.58383	35	0	3.60223e-15	Up-regulated
UBE4B	Pig	1.00813e-19	0.507432	364	209	3.68421e-15	Up-regulated
LEMD3	Pig	1.04338e-19	0.518925	187	84	3.81303e-15	Up-regulated
HSDL2	Pig	1.07097e-19	0.846133	0.13	48	3.91386e-15	Up-regulated
ATP5F1A	Pig	1.11007e-19	2.90673	0.05	5	4.05676e-15	Up-regulated
TBC1D22B	Pig	1.24475e-19	1.40556	98	0.03	4.54893e-15	Up-regulated
BPNT2	Pig	1.26819e-19	0.697684	0.13	47	4.6346e-15	Up-regulated
MAK	Pig	1.28358e-19	0.935101	94	27	4.69083e-15	Up-regulated
MDH1	Pig	1.29165e-19	4.83988	0.04	2	4.72034e-15	Up-regulated
CRYBG1	Pig	1.29376e-19	2.47064	59	0.01	4.72806e-15	Up-regulated
NT5DC3	Pig	1.30359e-19	3.15848	47	4	4.76395e-15	Up-regulated
TGIF1	Pig	1.34769e-19	2.34582	63	11	4.92513e-15	Up-regulated
SARS1	Pig	1.51874e-19	0.902552	93	27	5.55024e-15	Up-regulated
C16orf72	Pig	1.53237e-19	0.52018	201	93	5.60005e-15	Up-regulated
MTMR8	Pig	1.61198e-19	0.574686	135	51	5.89099e-15	Up-regulated
ENSSSCG00000007692	Pig	1.6343e-19	0.72599	116	39	5.97256e-15	Up-regulated
PTPN3	Pig	1.70688e-19	0.624632	156	64	6.23779e-15	Up-regulated
ENSSSCG00000048994	Pig	1.71757e-19	1.82802	59	0.01	6.27686e-15	Up-regulated
ENSSSCG00000010531	Pig	1.71933e-19	0.796175	134	51	6.28329e-15	Up-regulated
GNPDA2	Pig	1.8948e-19	0.796348	149	61	6.92456e-15	Up-regulated
ZNF24	Pig	1.93726e-19	0.957355	121	43	7.07971e-15	Up-regulated
NHLRC2	Pig	1.95332e-19	0.869795	153	64	7.13842e-15	Up-regulated
MYL6	Human	2.27436e-19	4.85101	39	1	8.31163e-15	Up-regulated
CNDP2	Pig	2.35804e-19	0.963374	87	24	8.61745e-15	Up-regulated
TMEM38B	Pig	2.46303e-19	1.65946	83	22	9.00114e-15	Up-regulated
DYNLL1	Pig	2.4835e-19	2.68899	46	4	9.07595e-15	Up-regulated
FKBP2	Pig	2.53477e-19	1.67991	61	0.01	9.26331e-15	Up-regulated
ENSSSCG00000033422	Pig	2.55351e-19	1.08741	125	47	9.33179e-15	Up-regulated
TPST2	Pig	2.5584e-19	5.07483	0.04	2	9.34968e-15	Up-regulated
ENSSSCG00000000405	Pig	2.58724e-19	3.52016	0.04	2	9.45507e-15	Up-regulated
PLIN2	Pig	2.59402e-19	0.656104	102	32	9.47986e-15	Up-regulated
ENSSSCG00000038633	Pig	2.74279e-19	1.52404	82	21	1.00235e-14	Up-regulated
METTL8	Pig	2.79744e-19	1.38666	87	24	1.02233e-14	Up-regulated
SPIRE1	Pig	3.02178e-19	0.864532	167	74	1.10431e-14	Up-regulated
ARMCX3	Pig	3.2424e-19	1.75766	73	17	1.18494e-14	Up-regulated
ASIC2	Pig	3.26513e-19	2.96838	49	5	1.19324e-14	Up-regulated
MSRB2	Pig	3.37663e-19	5.42774	37	1	1.23399e-14	Up-regulated
S100A6	Human	3.61455e-19	4.52141	37	1	1.32094e-14	Up-regulated
CD40	Pig	3.63984e-19	7.86712	34	0	1.33018e-14	Up-regulated
NEK11	Pig	3.70405e-19	3.12662	57	9	1.35365e-14	Up-regulated
MTMR12	Pig	3.73427e-19	2.54571	58	0.01	1.36469e-14	Up-regulated
TMEM242	Pig	4.19329e-19	1.36172	81	21	1.53244e-14	Up-regulated
SQLE	Pig	4.1948e-19	5.38133	38	1	1.53299e-14	Up-regulated
NTAN1	Pig	4.42394e-19	0.546096	129	48	1.61673e-14	Up-regulated
COX8A	Pig	4.48924e-19	2.90118	44	3	1.64059e-14	Up-regulated
FANCL	Pig	4.91296e-19	4.94142	39	2	1.79544e-14	Up-regulated
BCL9	Pig	4.93823e-19	1.81362	77	19	1.80468e-14	Up-regulated
LRRC58	Pig	4.99605e-19	0.808804	126	47	1.82581e-14	Up-regulated
ENSSSCG00000002430	Pig	5.17988e-19	0.690188	203	98	1.89299e-14	Up-regulated
LRPAP1	Pig	5.40202e-19	1.7224	66	13	1.97417e-14	Up-regulated
MANBA	Pig	5.46009e-19	2.44368	57	9	1.99539e-14	Up-regulated
ERCC8	Pig	5.58683e-19	1.00269	119	43	2.04171e-14	Up-regulated
GSR	Pig	5.70269e-19	0.685329	132	0.05	2.08405e-14	Up-regulated
GAPDH	Pig	5.85967e-19	2.38095	0.06	0.01	2.14142e-14	Up-regulated
NIPSNAP2	Pig	6.06622e-19	1.44081	122	46	2.2169e-14	Up-regulated
ALCAM	Pig	6.49459e-19	4.26623	41	3	2.37345e-14	Up-regulated
COG2	Pig	6.59159e-19	0.734792	161	0.07	2.4089e-14	Up-regulated
ENSSSCG00000032984	Pig	6.78522e-19	0.610262	236	0.12	2.47966e-14	Up-regulated
CHPF2	Pig	6.83329e-19	0.640376	88	24	2.49723e-14	Up-regulated
LYSMD3	Pig	6.89408e-19	0.502662	156	65	2.51944e-14	Up-regulated
PTPN14	Pig	7.51038e-19	1.07057	123	46	2.74467e-14	Up-regulated
CS	Pig	7.76157e-19	1.71066	88	25	2.83646e-14	Up-regulated
PATL1	Pig	7.80933e-19	1.15927	116	41	2.85392e-14	Up-regulated
ENSSSCG00000000473	Pig	8.08627e-19	0.90138	0.1	31	2.95513e-14	Up-regulated
ENSSSCG00000004081	Pig	8.59085e-19	0.901706	222	115	3.13953e-14	Up-regulated
RGMB	Pig	8.66607e-19	1.65962	107	37	3.16701e-14	Up-regulated
NME2	Pig	8.72993e-19	0.956928	78	19	3.19035e-14	Up-regulated
CASP8AP2	Pig	8.74094e-19	0.56606	96	29	3.19438e-14	Up-regulated
CPSF3	Pig	8.97965e-19	1.69411	89	26	3.28161e-14	Up-regulated
SSBP3	Pig	9.30351e-19	0.694983	316	183	3.39997e-14	Up-regulated
METRNL	Pig	9.7057e-19	6.1951	35	0	3.54695e-14	Up-regulated
AMN1	Pig	9.79795e-19	0.744468	209	103	3.58066e-14	Up-regulated
RBFOX1	Pig	9.83344e-19	5.95251	35	0	3.59363e-14	Up-regulated
PGGT1B	Pig	9.92324e-19	0.796493	0.16	69	3.62645e-14	Up-regulated
NFE2L1	Pig	1.1807e-18	1.3244	114	41	4.31487e-14	Up-regulated
PBX4	Pig	1.23348e-18	0.719791	138	55	4.50775e-14	Up-regulated
VEZT	Pig	1.23637e-18	0.592485	197	94	4.51831e-14	Up-regulated
SUGP1	Pig	1.37304e-18	1.59052	81	21	5.01779e-14	Up-regulated
COPS8	Pig	1.53191e-18	1.29545	82	22	5.59838e-14	Up-regulated
SERP1	Pig	1.62185e-18	2.4289	47	5	5.92704e-14	Up-regulated
PLAU	Pig	1.67697e-18	2.76631	45	4	6.1285e-14	Up-regulated
MAGED1	Pig	1.70153e-18	0.509824	107	36	6.21823e-14	Up-regulated
RPS18	Pig	1.75622e-18	0.658271	118	42	6.41809e-14	Up-regulated
SNX29	Pig	1.83752e-18	0.514604	0.39	237	6.71523e-14	Up-regulated
ABHD12	Pig	1.92173e-18	2.46288	52	7	7.02296e-14	Up-regulated
DCTD	Pig	1.94063e-18	1.37153	58	0.01	7.09204e-14	Up-regulated
THSD7B	Pig	1.96342e-18	1.69274	95	0.03	7.17531e-14	Up-regulated
FAM117B	Pig	1.97899e-18	0.775221	132	52	7.23222e-14	Up-regulated
STXBP3	Pig	2.05335e-18	0.608602	214	106	7.50395e-14	Up-regulated
AASDHPPT	Pig	2.1033e-18	0.515484	161	69	7.68651e-14	Up-regulated
NUDT13	Pig	2.10438e-18	1.05666	84	23	7.69046e-14	Up-regulated
C3orf14	Pig	2.14688e-18	1.82183	52	7	7.84578e-14	Up-regulated
EIF4E	Pig	2.15466e-18	0.940689	132	52	7.87419e-14	Up-regulated
RAB11FIP5	Pig	2.38927e-18	1.45949	85	24	8.7316e-14	Up-regulated
SLC25A15	Pig	2.5e-18	1.64563	75	19	9.13625e-14	Up-regulated
GYG2	Pig	2.50849e-18	1.88707	84	24	9.16729e-14	Up-regulated
ADPRM	Pig	2.58294e-18	3.44171	44	4	9.43937e-14	Up-regulated
AGPAT2	Pig	2.61237e-18	1.1762	105	35	9.54691e-14	Up-regulated
APOBEC3B	Pig	2.83008e-18	1.67302	58	0.01	1.03425e-13	Up-regulated
NDUFA9	Pig	3.03956e-18	2.31468	63	13	1.11081e-13	Up-regulated
SLC39A9	Pig	3.26617e-18	0.706354	135	54	1.19362e-13	Up-regulated
CCDC43	Pig	3.45101e-18	2.44987	58	0.01	1.26117e-13	Up-regulated
PSMB1	Pig	3.47219e-18	1.24621	78	0.02	1.26891e-13	Up-regulated
TEX2	Pig	3.51479e-18	1.34618	97	31	1.28448e-13	Up-regulated
LRRC31	Pig	3.6967e-18	3.99455	38	2	1.35096e-13	Up-regulated
ZRANB1	Pig	3.78502e-18	0.586895	211	105	1.38324e-13	Up-regulated
ARHGEF33	Pig	4.01573e-18	0.862756	95	0.03	1.46755e-13	Up-regulated
MANEA	Pig	4.18372e-18	0.953048	0.08	21	1.52894e-13	Up-regulated
UHRF1BP1	Pig	4.37414e-18	2.02035	78	21	1.59853e-13	Up-regulated
LARP1B	Pig	4.37541e-18	2.5954	47	6	1.59899e-13	Up-regulated
COL1A1	Human	4.63172e-18	0.869309	79	21	1.69266e-13	Up-regulated
PDHX	Pig	4.65364e-18	0.638032	156	67	1.70067e-13	Up-regulated
CPNE3	Pig	4.71773e-18	0.580632	195	95	1.72409e-13	Up-regulated
PRDX1	Pig	5.11242e-18	2.49467	46	5	1.86834e-13	Up-regulated
ATP5ME	Pig	5.14114e-18	3.13027	0.04	3	1.87883e-13	Up-regulated
FBXL4	Pig	5.66648e-18	0.973682	151	65	2.07081e-13	Up-regulated
TBX3	Pig	5.71331e-18	1.79078	59	11	2.08793e-13	Up-regulated
ENSSSCG00000024669	Pig	5.88624e-18	0.693895	117	43	2.15113e-13	Up-regulated
TCTN1	Pig	6.62348e-18	2.74763	0.05	7	2.42055e-13	Up-regulated
PLPPR5	Pig	6.77302e-18	1.21271	76	0.02	2.4752e-13	Up-regulated
GART	Pig	6.8135e-18	1.00347	101	34	2.48999e-13	Up-regulated
PAWR	Pig	6.83861e-18	1.12384	86	25	2.49917e-13	Up-regulated
HMGCR	Pig	6.87594e-18	6.5616	33	0	2.51281e-13	Up-regulated
ENSSSCG00000028679	Pig	6.87725e-18	1.00953	125	48	2.51329e-13	Up-regulated
USP35	Pig	7.19244e-18	1.55768	55	9	2.62848e-13	Up-regulated
NLRC5	Pig	7.64037e-18	0.932405	75	19	2.79217e-13	Up-regulated
FNDC1	Pig	7.67624e-18	2.76683	64	14	2.80528e-13	Up-regulated
SNAP47	Pig	7.7506e-18	0.854267	144	61	2.83246e-13	Up-regulated
ENSSSCG00000013038	Pig	8.03827e-18	1.91139	74	19	2.93759e-13	Up-regulated
RMND1	Pig	8.06397e-18	0.817047	99	32	2.94698e-13	Up-regulated
PPM1A	Pig	8.33897e-18	0.52695	216	108	3.04748e-13	Up-regulated
ERGIC3	Pig	8.47598e-18	5.68765	34	1	3.09755e-13	Up-regulated
RTN4IP1	Pig	8.56931e-18	2.85647	47	6	3.13166e-13	Up-regulated
PHYH	Pig	8.66696e-18	1.57121	76	0.02	3.16734e-13	Up-regulated
ENY2	Pig	9.38573e-18	1.18453	77	0.02	3.43001e-13	Up-regulated
C5orf24	Pig	9.46245e-18	0.652073	0.16	0.07	3.45805e-13	Up-regulated
ENSSSCG00000048408	Pig	9.56956e-18	0.839549	129	51	3.4972e-13	Up-regulated
ASPDH	Pig	9.82036e-18	1.49855	46	5	3.58885e-13	Up-regulated
ALG8	Pig	9.95509e-18	1.33404	65	14	3.63809e-13	Up-regulated
CFAP97	Pig	1.03787e-17	0.655893	104	35	3.79291e-13	Up-regulated
CDCA7L	Pig	1.0456e-17	5.17626	35	1	3.82114e-13	Up-regulated
CLYBL	Pig	1.04675e-17	0.80571	113	41	3.82534e-13	Up-regulated
EIF3F	Pig	1.04818e-17	0.817441	103	35	3.83059e-13	Up-regulated
ENSSSCG00000031912	Pig	1.05026e-17	2.44622	54	9	3.83818e-13	Up-regulated
ENSSSCG00000010370	Pig	1.08886e-17	2.92816	41	3	3.97924e-13	Up-regulated
CD248	Pig	1.09727e-17	1.25331	78	21	4.00997e-13	Up-regulated
[truncated: 1,836 more rows]

## Sheet: NC
gene	Species	p_val	avg_log2FC	pct. 1	pct.2	p_val_adj	level
ITGB8	Pig	4.1427e-14	4.64457	0.8	213	1.51395e-09	Up-regulated
PLPP1	Pig	4.21248e-14	3.13979	882	383	1.53945e-09	Up-regulated
NRIP1	Pig	6.46557e-14	3.57493	836	319	2.36284e-09	Up-regulated
DLG2	Pig	6.59171e-14	3.48245	873	383	2.40894e-09	Up-regulated
NAV2	Pig	1.03275e-12	2.10075	918	617	3.77418e-08	Up-regulated
PEAK1	Pig	3.37954e-12	2.03696	918	596	1.23505e-07	Up-regulated
CAMK2D	Pig	1.453e-11	2.2388	909	723	5.30997e-07	Up-regulated
ENSSSCG00000049691	Pig	1.88398e-11	2.0648	909	489	6.885e-07	Up-regulated
GRIK2	Pig	3.9975e-11	2.49395	873	553	1.46089e-06	Up-regulated
NKAIN2	Pig	7.26987e-11	3.8445	691	106	2.65677e-06	Up-regulated
GLIS3	Pig	3.99097e-10	2.47902	873	574	1.4585e-05	Up-regulated
ADGRB3	Pig	4.01304e-10	10.6456	555	0	1.46657e-05	Up-regulated
ROR1	Pig	5.3348e-10	4.88198	627	106	1.9496e-05	Up-regulated
EHBP1	Pig	6.02721e-10	3.19117	791	511	2.20264e-05	Up-regulated
RUNX2	Pig	1.37952e-09	4.06854	682	0.17	5.04145e-05	Up-regulated
HERC5	Pig	1.89155e-09	3.05627	664	128	6.91265e-05	Up-regulated
UTRN	Pig	2.98156e-09	1.38757	927	915	0.000108961	Up-regulated
RUNX1	Pig	3.61515e-09	5.23636	591	106	0.000132116	Up-regulated
ENSSSCG00000034570	Pig	1.41901e-08	4.42217	573	85	0.000518577	Up-regulated
ERBIN	Pig	1.43226e-08	1.82491	864	0.66	0.000523421	Up-regulated
ARHGAP24	Pig	3.01637e-08	0.933207	982	915	0.00110233	Up-regulated
TRIO	Pig	3.02523e-08	2.42871	727	362	0.00110557	Up-regulated
TANC2	Pig	3.771e-08	5.21586	536	85	0.00137811	Up-regulated
SHTN1	Pig	5.17463e-08	8.97421	455	0	0.00189107	Up-regulated
MTUS1	Pig	7.42209e-08	2.19208	736	383	0.0027124	Up-regulated
FIGN	Pig	7.55861e-08	1.96517	791	447	0.00276229	Up-regulated
AKAP6	Pig	1.27192e-07	4.9774	527	106	0.00464822	Up-regulated
CNKSR2	Pig	1.41972e-07	2.33689	682	277	0.00518837	Up-regulated
MX2	Pig	1.6689e-07	2.56387	573	85	0.00609901	Up-regulated
ANKRD44	Pig	2.32558e-07	1.40181	864	0.66	0.00849884	Up-regulated
PRKCA	Pig	2.64789e-07	1.5276	836	468	0.00967672	Up-regulated
IFI44L	Pig	4.89857e-07	1.93764	691	0.34	0.0179018	Up-regulated
HERC6	Pig	6.25563e-07	2.21238	636	0.17	0.0228612	Up-regulated
OXR1	Pig	9.57905e-07	2.62748	655	319	0.0350066	Up-regulated
MX1	Pig	1.15503e-06	3.07507	509	128	0.0422107	Up-regulated
CDYL2	Pig	1.20138e-06	3.71273	445	43	0.0439046	Up-regulated
GAB1	Pig	1.20899e-06	2.30423	664	277	0.0441825	Up-regulated
CD55	Human	1.49669e-21	-6.31942	9	702	5.46965e-17	Down-regulated
RORA	Pig	3.57622e-18	-3.27604	145	851	1.30693e-13	Down-regulated
ENSSSCG00000005518	Pig	4.98631e-18	-3.39075	191	851	1.82225e-13	Down-regulated
PHLDB1	Pig	4.45495e-17	-2.95016	236	872	1.62806e-12	Down-regulated
ENSSSCG00000033643	Pig	2.59604e-16	-3.52575	209	0.83	9.48722e-12	Down-regulated
KIAA1217	Pig	2.55515e-15	-3.10211	155	787	9.3378e-11	Down-regulated
DNER	Pig	4.31623e-15	-2.01656	0.4	957	1.57737e-10	Down-regulated
GALNT13	Pig	4.59808e-15	-6.60352	27	553	1.68037e-10	Down-regulated
ENSSSCG00000032439	Pig	9.20358e-15	-3.09517	191	809	3.36345e-10	Down-regulated
COL5A3	Pig	3.00613e-14	-3.38995	73	638	1.09859e-09	Down-regulated
ABCA6	Pig	6.71371e-14	-4.01666	73	617	2.45353e-09	Down-regulated
CNTN3	Pig	1.72549e-13	-4.14057	82	617	6.30581e-09	Down-regulated
AGAP1	Pig	3.1587e-13	-1.5929	773	1	1.15435e-08	Down-regulated
TTN	Pig	7.69258e-13	-1.53956	127	702	2.81125e-08	Down-regulated
SLC8A1	Pig	7.48896e-12	-4.39479	27	468	2.73684e-07	Down-regulated
NDST3	Pig	1.18945e-11	-3.21021	118	617	4.34684e-07	Down-regulated
DISC1	Pig	2.6681e-11	-2.34832	236	766	9.75056e-07	Down-regulated
PTPRT	Pig	3.1831e-11	-2.32901	282	809	1.16326e-06	Down-regulated
HIF3A	Pig	4.7228e-11	-3.36499	45	489	1.72595e-06	Down-regulated
AUTS2	Pig	6.72687e-11	-1.47518	755	979	2.45834e-06	Down-regulated
TNS3	Pig	8.11286e-11	-2.48336	82	574	2.96485e-06	Down-regulated
THRB	Pig	1.09754e-10	-3.3973	55	489	4.01095e-06	Down-regulated
ERBB3	Pig	1.17611e-10	-3.39988	0.1	553	4.29809e-06	Down-regulated
NRXN1	Pig	1.20816e-10	-1.49802	536	979	4.41522e-06	Down-regulated
GRIK3	Pig	1.43842e-10	-1.60569	655	979	5.25671e-06	Down-regulated
ARHGAP31	Pig	1.79113e-10	-1.64971	445	915	6.54568e-06	Down-regulated
COL15A1	Pig	3.68302e-10	-3.77738	45	447	1.34596e-05	Down-regulated
LRRTM4	Pig	4.1499e-10	-1.91829	436	915	1.51658e-05	Down-regulated
RBPMS	Pig	5.66293e-10	-1.5461	0.1	596	2.06952e-05	Down-regulated
ENSSSCG00000032877	Pig	7.34852e-10	-2.8283	55	489	2.68552e-05	Down-regulated
CPXM2	Pig	7.95271e-10	-2.44476	191	681	2.90632e-05	Down-regulated
SLIT3	Pig	8.53756e-10	-1.61425	255	787	3.12005e-05	Down-regulated
ADAM23	Pig	1.03318e-09	-1.69242	618	957	3.77576e-05	Down-regulated
ABI3BP	Pig	1.08214e-09	-2.06714	73	532	3.95469e-05	Down-regulated
EBF1	Pig	1.1299e-09	-5.92273	27	383	4.12921e-05	Down-regulated
ABCA8	Pig	1.26829e-09	-3.53037	55	447	4.63498e-05	Down-regulated
SGIP1	Pig	1.43949e-09	-2.78202	55	468	5.26061e-05	Down-regulated
PDE3B	Pig	1.68991e-09	-4.76729	18	362	6.17578e-05	Down-regulated
ENSSSCG00000044700	Pig	2.2779e-09	-1.84364	309	766	8.32459e-05	Down-regulated
ND4	Pig	2.42883e-09	-7.69394	0	298	8.87616e-05	Down-regulated
MECOM	Pig	6.26647e-09	-4.71462	18	0.34	0.000229008	Down-regulated
PDE3A	Pig	8.56548e-09	-1.72908	136	617	0.000313026	Down-regulated
PEAR1	Pig	8.77766e-09	-2.41719	45	426	0.00032078	Down-regulated
C8orf89	Pig	9.58522e-09	-3.8698	36	383	0.000350292	Down-regulated
PTPRM	Pig	9.76649e-09	-2.59281	236	0.66	0.000356916	Down-regulated
PPFIBP1	Pig	1.33674e-08	-2.34472	0.1	532	0.00048851	Down-regulated
HPGD	Pig	1.59231e-08	-6.18851	9	298	0.00058191	Down-regulated
ENSSSCG00000038144	Pig	2.03386e-08	-3.02997	73	447	0.000743275	Down-regulated
CNTN4	Pig	3.0534e-08	-1.208	545	957	0.00111587	Down-regulated
APOA1	Pig	3.52159e-08	-3.70066	36	362	0.00128696	Down-regulated
STK32B	Pig	3.7323e-08	-3.19732	55	404	0.00136397	Down-regulated
SRCIN1	Pig	4.01209e-08	-4.06231	45	383	0.00146622	Down-regulated
CCDC85A	Pig	4.02737e-08	-2.61987	127	532	0.0014718	Down-regulated
COX1	Pig	4.738e-08	-3.16215	82	447	0.0017315	Down-regulated
KIAA1755	Pig	4.94193e-08	-3.80793	27	0.34	0.00180603	Down-regulated
ZNF704	Pig	6.20212e-08	-3.24711	36	362	0.00226657	Down-regulated
OLFM2	Pig	1.13464e-07	-4.42052	18	298	0.00414654	Down-regulated
KAZN	Pig	1.17861e-07	-4.23637	27	319	0.00430722	Down-regulated
COL21A1	Pig	1.33102e-07	-3.92494	18	298	0.00486422	Down-regulated
SPARCL1	Pig	1.46303e-07	-2.34967	145	532	0.00534663	Down-regulated
PRKG1	Pig	1.53009e-07	-3.13213	45	362	0.00559171	Down-regulated
CYRIA	Pig	1.57066e-07	-2.31828	118	489	0.00573996	Down-regulated
ARAP3	Pig	1.59401e-07	-3.6485	27	319	0.00582532	Down-regulated
LIMS2	Pig	1.64176e-07	-7.06997	0	234	0.00599982	Down-regulated
PRCP	Pig	1.64176e-07	-7.67698	0	234	0.00599982	Down-regulated
P3H2	Pig	1.70318e-07	-1.91545	336	766	0.00622427	Down-regulated
PDE4D	Pig	1.8578e-07	-1.6459	391	766	0.00678935	Down-regulated
ABLIM1	Pig	1.955e-07	-2.16778	191	596	0.00714454	Down-regulated
ACSBG1	Pig	2.00231e-07	-2.51458	136	511	0.00731744	Down-regulated
SLC44A2	Pig	2.40256e-07	-3.0874	27	319	0.00878014	Down-regulated
PLXDC2	Pig	2.70838e-07	-1.06272	509	915	0.00989778	Down-regulated
PREX2	Pig	2.83413e-07	-1.75717	173	596	0.0103573	Down-regulated
COL5A1	Pig	3.30417e-07	-1.71115	182	596	0.0120751	Down-regulated
RCAN2	Pig	3.52716e-07	-2.02882	0.2	596	0.01289	Down-regulated
LRRK1	Pig	3.67942e-07	-2.75674	36	0.34	0.0134464	Down-regulated
CD36	Pig	4.01098e-07	-4.55278	9	255	0.0146581	Down-regulated
PREX1	Pig	4.39879e-07	-2.6327	109	468	0.0160754	Down-regulated
LGI1	Pig	5.77045e-07	-2.6691	73	404	0.0210881	Down-regulated
BCAT2	Pig	5.92203e-07	-3.6462	18	277	0.0216421	Down-regulated
PHACTR2	Pig	6.09247e-07	-3.56816	27	298	0.0222649	Down-regulated
PXN	Pig	6.37824e-07	-2.18124	109	489	0.0233093	Down-regulated
CORO2B	Pig	6.9801e-07	-2.01062	409	787	0.0255088	Down-regulated
ENSSSCG00000004082	Pig	7.82111e-07	-1.91153	164	532	0.0285823	Down-regulated
RIN2	Pig	8.46583e-07	-2.78427	27	298	0.0309384	Down-regulated
L1CAM	Pig	9.82204e-07	-2.71202	55	362	0.0358947	Down-regulated
ENSSSCG00000033262	Pig	1.01462e-06	-2.91795	27	298	0.0370793	Down-regulated
ENSSSCG00000003839	Pig	1.17213e-06	-4.44984	36	298	0.0428354	Down-regulated

## Sheet: Pericytes
gene	Species	p_val	avg_log2FC	pct. 1	pct.2	p_val_adj	level
C7	Pig	1.21835e-37	7.35593	755	18	4.45246e-33	Up-regulated
MX2	Pig	1.299e-36	6.87108	742	9	4.74719e-32	Up-regulated
PLSCR4	Pig	2.61295e-34	2.60605	872	292	9.54902e-30	Up-regulated
OAS2	Pig	9.71436e-32	3.74553	746	71	3.55011e-27	Up-regulated
KIT	Pig	1.1019e-31	7.40174	678	18	4.0269e-27	Up-regulated
ENSSSCG00000034570	Pig	6.54403e-31	4.92876	702	35	2.39152e-26	Up-regulated
IFI44L	Pig	1.79267e-29	4.14605	685	35	6.5513e-25	Up-regulated
ENSSSCG00000016263	Pig	3.1143e-29	5.77153	655	27	1.13812e-24	Up-regulated
ITPR1	Pig	5.87615e-29	2.18029	883	425	2.14744e-24	Up-regulated
THSD4	Pig	8.28993e-28	5.06596	648	35	3.02956e-23	Up-regulated
HERC6	Pig	1.13687e-23	3.08708	652	88	4.1547e-19	Up-regulated
SETX	Pig	2.73441e-23	2.8969	0.68	115	9.99291e-19	Up-regulated
MX1	Pig	7.54196e-23	4.4575	573	27	2.75621e-18	Up-regulated
RSAD2	Pig	4.75681e-22	9.27118	522	0	1.73837e-17	Up-regulated
F3	Pig	7.31618e-21	9.65894	501	0	2.6737e-16	Up-regulated
ENSSSCG00000022925	Pig	9.69939e-21	4.1605	567	71	3.54464e-16	Up-regulated
SLC39A14	Pig	1.439e-20	2.08716	725	239	5.25881e-16	Up-regulated
HIF1A	Pig	2.00245e-20	3.2539	603	106	7.31795e-16	Up-regulated
DYNC1I1	Pig	2.35686e-20	6.86146	501	9	8.61313e-16	Up-regulated
PLOD2	Pig	5.38525e-20	3.41681	597	106	1.96804e-15	Up-regulated
PID1	Pig	5.46733e-20	1.61867	857	469	1.99804e-15	Up-regulated
EIF2AK2	Pig	5.80472e-20	2.47021	631	124	2.12133e-15	Up-regulated
GPC5	Pig	6.41052e-20	10.9013	484	0	2.34273e-15	Up-regulated
HERC5	Pig	1.50978e-19	3.60442	533	35	5.51748e-15	Up-regulated
IGFBP7	Pig	1.73458e-19	1.53679	896	575	6.33902e-15	Up-regulated
FKBP5	Pig	3.3742e-19	1.33364	893	566	1.2331e-14	Up-regulated
UGP2	Pig	3.70454e-19	6.57022	0.48	9	1.35382e-14	Up-regulated
STK39	Pig	4.12655e-19	1.74194	808	434	1.50805e-14	Up-regulated
SLC7A2	Pig	4.42003e-19	3.74934	546	71	1.6153e-14	Up-regulated
ADAMTS9	Pig	1.01431e-18	2.22811	0.71	265	3.70679e-14	Up-regulated
KHDRBS3	Pig	1.67396e-18	9.4583	458	0	6.11747e-14	Up-regulated
CAMK2D	Pig	3.59732e-18	1.68709	765	381	1.31464e-13	Up-regulated
GPM6B	Pig	6.39986e-18	3.28383	529	71	2.33883e-13	Up-regulated
MAGI1	Pig	6.60263e-18	1.65091	782	336	2.41293e-13	Up-regulated
IGF1	Pig	7.91093e-18	5.12096	469	18	2.89105e-13	Up-regulated
PARP12	Pig	8.36642e-18	3.67519	497	35	3.05751e-13	Up-regulated
ZNFX1	Pig	9.06998e-18	2.53568	525	53	3.31463e-13	Up-regulated
ENSSSCG00000001341	Pig	7.75698e-17	3.76034	492	53	2.83479e-12	Up-regulated
CTTNBP2	Pig	1.25781e-16	3.208	559	133	4.59667e-12	Up-regulated
ISG12(A)	Pig	1.35648e-16	4.66796	448	18	4.95727e-12	Up-regulated
USP18	Pig	2.60368e-16	4.42561	444	18	9.51516e-12	Up-regulated
HGF	Pig	3.89168e-16	3.49046	0.51	0.08	1.42222e-11	Up-regulated
ENSSSCG00000017146	Pig	6.2855e-16	2.13847	608	0.15	2.29704e-11	Up-regulated
LTBP1	Pig	1.47372e-15	1.55921	774	407	5.38569e-11	Up-regulated
FUT8	Pig	1.91253e-15	2.53923	0.51	0.08	6.98935e-11	Up-regulated
FAM13C	Pig	2.13297e-15	3.51906	473	53	7.79493e-11	Up-regulated
EDNRA	Pig	2.67809e-15	9.01482	394	0	9.78707e-11	Up-regulated
ARHGAP42	Pig	5.05825e-15	2.0457	655	292	1.84854e-10	Up-regulated
ABHD2	Pig	8.0453e-15	6.14184	395	9	2.94016e-10	Up-regulated
SOX5	Pig	8.09043e-15	0.911055	927	788	2.95665e-10	Up-regulated
CLIP1	Pig	8.11258e-15	2.1717	616	221	2.96474e-10	Up-regulated
STAT1	Pig	2.11006e-14	1.73038	605	0.15	7.71121e-10	Up-regulated
MBNL1	Pig	2.75536e-14	1.69208	0.71	327	1.00695e-09	Up-regulated
ANO3	Pig	3.00681e-14	3.40916	476	88	1.09884e-09	Up-regulated
ENSSSCG00000010893	Pig	3.33306e-14	3.06884	452	53	1.21807e-09	Up-regulated
COMMD6	Pig	5.15666e-14	1.84991	621	239	1.8845e-09	Up-regulated
CHSY3	Pig	6.85744e-14	3.10649	486	106	2.50605e-09	Up-regulated
RCSD1	Pig	1.10121e-13	2.48219	499	88	4.02438e-09	Up-regulated
NRP1	Pig	1.22286e-13	1.08539	866	531	4.46894e-09	Up-regulated
PRR16	Pig	1.65615e-13	4.37245	394	27	6.0524e-09	Up-regulated
ENSSSCG00000001229	Pig	2.68967e-13	2.37346	514	124	9.82941e-09	Up-regulated
DDX60	Pig	6.1839e-13	5.80164	354	9	2.25991e-08	Up-regulated
HIVEP2	Pig	6.83753e-13	1.40185	716	363	2.49877e-08	Up-regulated
SPRED1	Pig	6.95837e-13	1.96799	557	159	2.54294e-08	Up-regulated
PAPPA	Pig	7.3367e-13	2.6355	512	142	2.6812e-08	Up-regulated
BST2	Pig	1.23685e-12	4.73705	352	9	4.52007e-08	Up-regulated
FMO4	Pig	1.36153e-12	2.73834	441	0.08	4.9757e-08	Up-regulated
DACH1	Pig	2.03598e-12	3.50774	407	53	7.44048e-08	Up-regulated
USP25	Pig	2.4522e-12	1.58391	601	204	8.96158e-08	Up-regulated
ENSSSCG00000014280	Pig	7.68692e-12	2.14304	518	159	2.80918e-07	Up-regulated
PPP3CA	Pig	7.80729e-12	1.33962	627	265	2.85318e-07	Up-regulated
IFI44	Pig	7.95845e-12	1.73184	439	71	2.90841e-07	Up-regulated
FAM13A	Pig	8.26812e-12	2.12534	505	133	3.02158e-07	Up-regulated
EPSTI1	Pig	9.20282e-12	3.13747	386	44	3.36317e-07	Up-regulated
ISG15	Pig	1.27345e-11	5.53512	326	9	4.65383e-07	Up-regulated
HIPK3	Pig	1.55745e-11	2.0212	539	186	5.69171e-07	Up-regulated
NHSL1	Pig	2.06446e-11	2.3162	463	115	7.54457e-07	Up-regulated
PI15	Pig	2.26798e-11	9.98808	305	0	8.28833e-07	Up-regulated
PARP14	Pig	2.8823e-11	3.80515	333	18	1.05334e-06	Up-regulated
PRKN	Pig	2.88474e-11	1.60179	591	248	1.05423e-06	Up-regulated
ACSL3	Pig	4.33556e-11	2.20416	503	159	1.58443e-06	Up-regulated
PDGFC	Pig	4.62838e-11	8.62417	298	0	1.69144e-06	Up-regulated
MTUS1	Pig	5.05314e-11	2.37122	452	106	1.84667e-06	Up-regulated
MMD	Pig	5.52474e-11	8.22004	296	0	2.01902e-06	Up-regulated
LIFR	Pig	1.3472e-10	1.23332	687	327	4.92333e-06	Up-regulated
MGMT	Pig	1.45848e-10	1.5478	584	212	5.33002e-06	Up-regulated
ARAP2	Pig	1.91279e-10	1.46488	548	177	6.99027e-06	Up-regulated
OSMR	Pig	1.99594e-10	3.03191	352	44	7.29417e-06	Up-regulated
DTX3L	Pig	2.65607e-10	7.78606	279	0	9.7066e-06	Up-regulated
CACNA2D1	Pig	2.75405e-10	1.32014	0.71	398	1.00647e-05	Up-regulated
STK38L	Pig	3.18108e-10	1.46705	608	283	1.16252e-05	Up-regulated
IGFBP2	Pig	3.96686e-10	3.78966	307	18	1.44969e-05	Up-regulated
FMO1	Pig	5.04258e-10	4.05972	348	62	1.84281e-05	Up-regulated
CHST15	Pig	6.23462e-10	5.9462	282	9	2.27844e-05	Up-regulated
REXO2	Pig	6.73011e-10	2.2021	0.42	97	2.45952e-05	Up-regulated
SNX10	Pig	7.74671e-10	2.46715	358	53	2.83104e-05	Up-regulated
USP6NL	Pig	7.90301e-10	2.86895	0.33	35	2.88815e-05	Up-regulated
PLSCR1	Pig	8.37204e-10	1.82295	401	88	3.05956e-05	Up-regulated
USP15	Pig	8.61073e-10	1.57428	524	186	3.14679e-05	Up-regulated
AAK1	Pig	1.19887e-09	1.96828	0.45	133	4.38126e-05	Up-regulated
TRIM22	Pig	1.41635e-09	1.85915	347	53	5.17606e-05	Up-regulated
SPATA5	Pig	1.58602e-09	1.57004	493	159	5.79612e-05	Up-regulated
GPC6	Pig	1.76549e-09	1.08969	529	186	6.45197e-05	Up-regulated
NBR1	Pig	1.86054e-09	2.53409	356	62	6.79935e-05	Up-regulated
TGFBR3	Pig	1.9732e-09	1.5896	557	239	7.21105e-05	Up-regulated
STOM	Pig	2.00821e-09	2.245	0.42	115	7.33901e-05	Up-regulated
CDC14A	Pig	2.04258e-09	2.062	388	0.08	7.46459e-05	Up-regulated
IFIT1	Pig	2.21814e-09	3.05713	307	27	8.1062e-05	Up-regulated
TBC1D5	Pig	2.43873e-09	1.14258	631	292	8.91233e-05	Up-regulated
FBXO30	Pig	2.59284e-09	2.91968	331	53	9.47553e-05	Up-regulated
SLC24A3	Pig	2.64067e-09	1.82995	409	106	9.65033e-05	Up-regulated
B2M	Pig	2.65626e-09	1.7085	465	142	9.70732e-05	Up-regulated
FBXO32	Pig	2.81986e-09	7.93392	252	0	0.000103052	Up-regulated
AP3B1	Pig	3.71407e-09	1.6987	446	133	0.000135731	Up-regulated
CTSC	Pig	4.25151e-09	5.13928	262	9	0.000155371	Up-regulated
ENSSSCG00000016868	Pig	4.33376e-09	2.8238	335	53	0.000158377	Up-regulated
RAI14	Pig	4.37006e-09	3.42119	303	35	0.000159704	Up-regulated
SDCBP	Pig	5.22363e-09	1.8491	0.36	71	0.000190898	Up-regulated
ANKRD17	Pig	5.99153e-09	1.39115	563	274	0.000218961	Up-regulated
TP53INP1	Pig	6.0568e-09	2.38283	322	44	0.000221346	Up-regulated
NFIA	Pig	6.87835e-09	0.993709	814	593	0.000251369	Up-regulated
PTPN13	Pig	7.03211e-09	1.02305	661	301	0.000256988	Up-regulated
FOXS1	Pig	7.45036e-09	3.96271	273	18	0.000272274	Up-regulated
GPHN	Pig	7.58391e-09	1.06313	697	389	0.000277154	Up-regulated
EFR3B	Pig	8.45677e-09	2.58825	367	88	0.000309053	Up-regulated
ADGRF5	Pig	9.5607e-09	1.3136	501	177	0.000349396	Up-regulated
ZMAT3	Pig	1.04286e-08	7.53121	237	0	0.000381112	Up-regulated
TMEM150C	Pig	1.12743e-08	1.96304	341	62	0.000412019	Up-regulated
CDH13	Pig	1.13734e-08	3.12977	318	53	0.00041564	Up-regulated
OLFM3	Pig	1.22551e-08	9.43065	235	0	0.000447863	Up-regulated
GNAI1	Pig	1.23759e-08	1.67761	463	168	0.000452276	Up-regulated
ZC3HAV1	Pig	1.31016e-08	3.29162	282	27	0.000478797	Up-regulated
ASCC3	Pig	1.39075e-08	1.92261	411	124	0.00050825	Up-regulated
CMPK2	Pig	1.4395e-08	7.27943	234	0	0.000526064	Up-regulated
ACCSL	Pig	1.74063e-08	1.58335	514	0.23	0.000636112	Up-regulated
ZNF292	Pig	1.76103e-08	2.08697	0.36	0.08	0.00064357	Up-regulated
ZBTB38	Pig	2.17123e-08	1.87659	0.42	124	0.000793478	Up-regulated
TMEM182	Pig	2.64056e-08	3.75698	269	27	0.000964991	Up-regulated
USP24	Pig	2.7402e-08	1.8183	456	186	0.0010014	Up-regulated
MAP3K5	Pig	3.21773e-08	1.62788	0.52	239	0.00117592	Up-regulated
PHKB	Pig	3.40558e-08	1.66577	458	168	0.00124457	Up-regulated
ATP8B1	Pig	4.59907e-08	3.24286	284	44	0.00168073	Up-regulated
GCNT2	Pig	4.6369e-08	2.89837	292	44	0.00169456	Up-regulated
COL12A1	Pig	4.82109e-08	2.2709	256	18	0.00176187	Up-regulated
ADAMTS3	Pig	5.18039e-08	4.36994	235	9	0.00189317	Up-regulated
IFIH1	Pig	5.39235e-08	1.48855	358	0.08	0.00197063	Up-regulated
KCNQ5	Pig	6.79912e-08	7.45113	228	9	0.00248474	Up-regulated
ZBP1	Pig	6.84793e-08	3.87658	247	18	0.00250257	Up-regulated
IRS1	Pig	6.92191e-08	2.94071	309	62	0.00252961	Up-regulated
PCMTD1	Pig	7.56023e-08	2.07176	356	88	0.00276289	Up-regulated
NCKAP1	Pig	7.71839e-08	1.25629	495	186	0.00282068	Up-regulated
KLHL24	Pig	7.96252e-08	3.08149	262	27	0.0029099	Up-regulated
SSBP2	Pig	8.28205e-08	1.09136	631	354	0.00302667	Up-regulated
RUNX1	Pig	9.93388e-08	3.1936	267	35	0.00363034	Up-regulated
SNAPC1	Pig	1.03021e-07	2.69961	284	44	0.00376491	Up-regulated
ENAH	Pig	1.0566e-07	1.20116	637	363	0.00386135	Up-regulated
MEIS2	Pig	1.13064e-07	1.00428	642	345	0.00413194	Up-regulated
FAM214A	Pig	1.15584e-07	1.23226	492	204	0.004224	Up-regulated
GTPBP8	Pig	1.20401e-07	2.62761	343	88	0.00440005	Up-regulated
GPR155	Pig	1.44487e-07	2.00264	284	44	0.00528028	Up-regulated
NSD3	Pig	1.51997e-07	1.41492	446	159	0.00555474	Up-regulated
MITF	Pig	1.55711e-07	2.16591	382	133	0.00569045	Up-regulated
RGS2	Pig	1.66655e-07	4.19453	234	18	0.00609042	Up-regulated
NLK	Pig	1.75105e-07	2.96842	273	44	0.0063992	Up-regulated
NMI	Pig	1.91834e-07	4.79248	218	9	0.00701056	Up-regulated
LRP12	Pig	1.96035e-07	4.46921	241	27	0.00716411	Up-regulated
TBL1XR1	Pig	2.15405e-07	1.28588	493	212	0.00787197	Up-regulated
MAN1A1	Pig	2.17133e-07	2.44159	252	27	0.00793513	Up-regulated
RESF1	Pig	2.22089e-07	1.60532	347	88	0.00811626	Up-regulated
CPEB4	Pig	2.32949e-07	2.05218	301	62	0.00851313	Up-regulated
CAST	Pig	2.35778e-07	3.50645	243	27	0.00861652	Up-regulated
MFHAS1	Pig	2.49953e-07	2.16139	339	97	0.00913452	Up-regulated
DENND5B	Pig	2.51056e-07	2.25381	0.33	88	0.00917484	Up-regulated
CHSY1	Pig	2.52572e-07	1.78843	375	115	0.00923023	Up-regulated
LRIG1	Pig	2.65055e-07	1.69871	363	106	0.00968645	Up-regulated
PML	Pig	2.6511e-07	1.20442	367	106	0.00968844	Up-regulated
WDR17	Pig	2.86696e-07	1.31418	495	204	0.0104773	Up-regulated
ZCCHC7	Pig	2.91439e-07	1.07016	567	265	0.0106506	Up-regulated
ZCCHC24	Pig	3.00572e-07	0.871481	589	274	0.0109844	Up-regulated
DDIT4	Pig	3.17531e-07	2.2084	273	44	0.0116042	Up-regulated
FSTL5	Pig	3.18413e-07	5.60903	211	9	0.0116364	Up-regulated
CEP70	Pig	3.38973e-07	1.98817	322	0.08	0.0123878	Up-regulated
CEBPD	Pig	3.9215e-07	4.20075	211	9	0.0143311	Up-regulated
GTF2A1L	Pig	3.94452e-07	2.87238	241	27	0.0144153	Up-regulated
HBP1	Pig	4.38046e-07	2.04569	309	71	0.0160084	Up-regulated
ZNF662	Pig	4.47723e-07	2.70368	277	53	0.0163621	Up-regulated
ACSL4	Pig	4.65661e-07	1.57405	397	133	0.0170176	Up-regulated
SORL1	Pig	4.75822e-07	2.57016	281	53	0.0173889	Up-regulated
NFAT5	Pig	4.90887e-07	1.49246	429	177	0.0179395	Up-regulated
PIK3C2B	Pig	4.95885e-07	2.07692	252	35	0.0181221	Up-regulated
ST3GAL6	Pig	5.02802e-07	1.98547	269	44	0.0183749	Up-regulated
CHRM2	Pig	5.16237e-07	7.41198	0.19	0	0.0188659	Up-regulated
SMYD3	Pig	5.17228e-07	1.02005	518	239	0.0189021	Up-regulated
PARP8	Pig	5.22101e-07	1.78248	337	88	0.0190802	Up-regulated
CD36	Pig	5.31592e-07	0.952332	554	265	0.019427	Up-regulated
NOL11	Pig	5.36655e-07	1.19909	642	389	0.0196121	Up-regulated
IL4R	Pig	5.5429e-07	4.66954	205	9	0.0202565	Up-regulated
MSRB3	Pig	5.87839e-07	2.03877	328	97	0.0214826	Up-regulated
ENSSSCG00000014997	Pig	5.95124e-07	3.82966	0.23	27	0.0217488	Up-regulated
ELL2	Pig	6.08785e-07	2.91087	237	27	0.022248	Up-regulated
GALK2	Pig	6.10065e-07	1.44062	299	62	0.0222948	Up-regulated
CBLB	Pig	6.22465e-07	1.0443	659	407	0.022748	Up-regulated
EXOC4	Pig	6.29275e-07	0.725989	789	531	0.0229969	Up-regulated
RASL12	Pig	6.7199e-07	3.00109	0.22	18	0.0245579	Up-regulated
ARL13B	Pig	6.7575e-07	1.56057	331	88	0.0246953	Up-regulated
CADPS2	Pig	6.9732e-07	7.68606	186	0	0.0254835	Up-regulated
TRANK1	Pig	7.7097e-07	2.54409	0.26	44	0.0281751	Up-regulated
PLEKHA2	Pig	7.74068e-07	1.33414	524	265	0.0282883	Up-regulated
SLC38A2	Pig	7.85985e-07	1.74696	377	133	0.0287238	Up-regulated
MBD2	Pig	7.91068e-07	1.47099	367	115	0.0289096	Up-regulated
ADD3	Pig	7.95885e-07	1.49294	443	186	0.0290856	Up-regulated
TRPM7	Pig	8.18402e-07	1.1918	476	212	0.0299085	Up-regulated
MARK3	Pig	8.39541e-07	0.997134	0.55	257	0.030681	Up-regulated
ENSSSCG00000029160	Pig	8.56641e-07	4.12394	202	9	0.0313059	Up-regulated
ETV6	Pig	8.56654e-07	0.950345	635	354	0.0313064	Up-regulated
PRKD1	Pig	8.60485e-07	3.23748	262	53	0.0314464	Up-regulated
SAMD9	Pig	9.96368e-07	2.39536	217	18	0.0364123	Up-regulated
ADCY3	Pig	1.01291e-06	1.59295	369	115	0.037017	Up-regulated
LRP6	Pig	1.01369e-06	1.1192	431	159	0.0370454	Up-regulated
ST8SIA4	Pig	1.05715e-06	1.90821	309	0.08	0.0386334	Up-regulated
PDK4	Pig	1.09141e-06	7.59451	181	0	0.0398856	Up-regulated
LGALS3BP	Pig	1.09141e-06	7.2715	181	0	0.0398856	Up-regulated
ENSSSCG00000035751	Pig	1.12792e-06	4.70917	196	9	0.0412199	Up-regulated
MDFIC	Pig	1.14877e-06	1.29162	377	115	0.0419819	Up-regulated
TBC1D1	Pig	1.17376e-06	1.3708	488	239	0.042895	Up-regulated
YAP1	Pig	1.26312e-06	1.41141	424	168	0.0461608	Up-regulated
RGS4	Pig	1.36667e-06	3.74499	196	9	0.0499448	Up-regulated
CD55	Human	3.54409e-60	-6.72525	15	531	1.29519e-55	Down-regulated
NTN4	Pig	3.40618e-57	-5.65495	68	655	1.24479e-52	Down-regulated
CREB5	Pig	1.42677e-49	-4.07396	115	699	5.21413e-45	Down-regulated
PLCB4	Pig	4.87204e-45	-3.07985	309	858	1.78049e-40	Down-regulated
GRM7	Pig	1.8761e-31	-2.23988	437	885	6.85621e-27	Down-regulated
TTN	Pig	8.68663e-30	-2.68567	207	673	3.17453e-25	Down-regulated
SYNPO2	Pig	6.06488e-29	-2.1702	646	903	2.21641e-24	Down-regulated
ENSSSCG00000005518	Pig	8.37845e-29	-3.09037	241	664	3.06191e-24	Down-regulated
PDE4D	Pig	1.73328e-28	-3.15129	224	664	6.33426e-24	Down-regulated
ENSSSCG00000012101	Pig	6.46421e-26	-8.82555	2	212	2.36235e-21	Down-regulated
DAAM2	Pig	8.03436e-26	-2.15238	488	823	2.93616e-21	Down-regulated
EXT1	Pig	5.38323e-25	-1.54937	778	912	1.9673e-20	Down-regulated
SH3RF2	Pig	7.93336e-25	-4.84942	36	327	2.89925e-20	Down-regulated
FRMD4B	Pig	1.4142e-23	-6.22018	2	195	5.16818e-19	Down-regulated
P3H2	Pig	1.20481e-22	-1.94801	503	832	4.40298e-18	Down-regulated
PDE10A	Pig	5.70447e-21	-1.39972	774	956	2.0847e-16	Down-regulated
ABCA8	Pig	6.86594e-21	-3.93917	38	301	2.50916e-16	Down-regulated
RCAN2	Pig	3.35856e-20	-2.77403	104	442	1.22738e-15	Down-regulated
RBPMS	Pig	7.77023e-20	-1.16031	857	956	2.83963e-15	Down-regulated
CABLES1	Pig	1.47798e-19	-2.58092	139	487	5.40128e-15	Down-regulated
HSPG2	Pig	1.56358e-19	-3.53569	81	381	5.71409e-15	Down-regulated
GRIK4	Pig	2.93785e-19	-3.47886	62	345	1.07364e-14	Down-regulated
TIMP3	Pig	4.43226e-19	-2.58216	348	673	1.61977e-14	Down-regulated
GPC3	Pig	6.49699e-19	-3.40131	0.06	336	2.37433e-14	Down-regulated
SPARCL1	Pig	1.88653e-18	-2.03051	412	699	6.89433e-14	Down-regulated
THRB	Pig	3.88625e-18	-2.91585	45	301	1.42023e-13	Down-regulated
AUTS2	Pig	5.82935e-18	-1.57573	535	796	2.13034e-13	Down-regulated
SF3B1	Pig	1.06694e-17	-1.79558	407	708	3.89913e-13	Down-regulated
EPAS1	Pig	6.55745e-17	-2.17792	0.25	584	2.39642e-12	Down-regulated
CCDC3	Pig	7.40068e-17	-4.03915	17	204	2.70458e-12	Down-regulated
COL15A1	Pig	7.49953e-17	-5.28505	15	195	2.7407e-12	Down-regulated
RGS6	Pig	1.0669e-16	-2.8337	102	398	3.89898e-12	Down-regulated
ZNF385D	Pig	3.33599e-16	-4.46824	24	221	1.21914e-11	Down-regulated
MME	Pig	4.7265e-16	-7.38051	2	133	1.7273e-11	Down-regulated
ST6GALNAC3	Pig	5.69574e-16	-6.45553	6	0.15	2.08151e-11	Down-regulated
ENSSSCG00000009672	Pig	6.05334e-16	-6.87483	4	142	2.21219e-11	Down-regulated
ARHGAP10	Pig	7.26547e-16	-1.0406	821	947	2.65517e-11	Down-regulated
SOX13	Pig	1.17372e-15	-2.24512	0.33	619	4.28937e-11	Down-regulated
ANTXR1	Pig	2.99047e-15	-2.08357	284	593	1.09287e-10	Down-regulated
GEM	Pig	4.20736e-15	-3.02531	72	319	1.53758e-10	Down-regulated
ENPEP	Pig	7.90649e-15	-2.00275	371	646	2.88943e-10	Down-regulated
LPAR1	Pig	8.242e-15	-5.57324	4	133	3.01204e-10	Down-regulated
TPM1	Pig	9.54433e-15	-1.3989	687	858	3.48798e-10	Down-regulated
MEF2C	Pig	1.89705e-14	-1.82047	437	708	6.93277e-10	Down-regulated
HS3ST5	Pig	1.96113e-14	-4.85075	13	168	7.16693e-10	Down-regulated
A2M	Pig	2.43425e-14	-3.60579	53	274	8.89597e-10	Down-regulated
TNXB	Pig	3.65484e-14	-9.36467	0	106	1.33566e-09	Down-regulated
COX1	Pig	6.57872e-14	-3.06212	0.16	425	2.40419e-09	Down-regulated
ENSSSCG00000038192	Pig	7.34494e-14	-6.56429	2	115	2.68421e-09	Down-regulated
NTF3	Pig	1.09936e-13	-2.99795	92	336	4.01762e-09	Down-regulated
ENSSSCG00000011729	Pig	2.05056e-13	-3.13497	58	274	7.49376e-09	Down-regulated
PDZRN4	Pig	2.13726e-13	-2.73588	113	372	7.81061e-09	Down-regulated
EGFLAM	Pig	7.61273e-13	-1.30859	742	876	2.78207e-08	Down-regulated
KLHL13	Pig	9.05067e-13	-5.88851	6	124	3.30757e-08	Down-regulated
BACH2	Pig	1.35218e-12	-2.72422	56	265	4.94154e-08	Down-regulated
RORA	Pig	3.92077e-12	-0.903284	849	938	1.43285e-07	Down-regulated
ENSSSCG00000042498	Pig	1.10233e-11	-4.97143	6	115	4.02848e-07	Down-regulated
TSEN15	Pig	1.34755e-11	-1.77189	324	575	4.92461e-07	Down-regulated
FILIP1L	Pig	1.67933e-11	-2.04212	292	531	6.13711e-07	Down-regulated
LAMA4	Pig	1.91402e-11	-1.74116	301	549	6.99478e-07	Down-regulated
FHL5	Pig	2.87299e-11	-2.50621	158	398	1.04993e-06	Down-regulated
RECK	Pig	4.07189e-11	-2.52367	156	398	1.48807e-06	Down-regulated
DENND2A	Pig	5.96317e-11	-1.54175	341	575	2.17924e-06	Down-regulated
GUCY1B1	Pig	6.023e-11	-1.25884	478	708	2.20111e-06	Down-regulated
CD163	Pig	6.05041e-11	-8.63009	0	0.08	2.21112e-06	Down-regulated
IGF2	Pig	6.05041e-11	-9.0895	0	0.08	2.21112e-06	Down-regulated
CYTH3	Pig	1.02872e-10	-1.17969	725	814	3.75944e-06	Down-regulated
DMD	Pig	1.29655e-10	-1.28255	411	637	4.73825e-06	Down-regulated
ENSSSCG00000016810	Pig	1.69527e-10	-1.66864	128	363	6.19537e-06	Down-regulated
ATP1A2	Pig	2.33724e-10	-2.4898	19	0.15	8.54144e-06	Down-regulated
PLCL1	Pig	2.90103e-10	-1.32549	597	761	1.06018e-05	Down-regulated
CD4	Pig	3.45263e-10	-3.64734	11	124	1.26177e-05	Down-regulated
ARHGAP44	Pig	3.62264e-10	-3.56151	17	142	1.32389e-05	Down-regulated
FERMT2	Pig	3.78778e-10	-1.88103	444	619	1.38424e-05	Down-regulated
PIK3R1	Pig	5.45788e-10	-1.25523	488	673	1.99458e-05	Down-regulated
PTPRF	Pig	7.71184e-10	-3.34097	24	159	2.81829e-05	Down-regulated
PAPLN	Pig	1.25419e-09	-2.62731	89	283	4.58344e-05	Down-regulated
RNF180	Pig	1.52138e-09	-1.84974	241	478	5.55989e-05	Down-regulated
ENSSSCG00000009125	Pig	2.09646e-09	-1.94182	77	265	7.66152e-05	Down-regulated
SCN7A	Pig	2.68766e-09	-4.00819	11	115	9.82206e-05	Down-regulated
ADAMTSL3	Pig	3.60641e-09	-2.95694	38	186	0.000131796	Down-regulated
MYOF	Pig	3.7639e-09	-2.04499	237	451	0.000137552	Down-regulated
ENSSSCG00000032599	Pig	4.4172e-09	-3.19506	53	212	0.000161426	Down-regulated
COLEC12	Pig	5.52446e-09	-2.19136	79	265	0.000201892	Down-regulated
ROBO4	Pig	8.38169e-09	-8.23584	0	62	0.000306309	Down-regulated
SLC9A3R2	Pig	8.38169e-09	-9.37699	0	62	0.000306309	Down-regulated
DTX4	Pig	9.64739e-09	-4.34279	13	115	0.000352564	Down-regulated
EBF2	Pig	1.00332e-08	-0.9057	0.77	867	0.000366662	Down-regulated
FNIP2	Pig	1.09952e-08	-1.40279	424	611	0.000401821	Down-regulated
ABCA6	Pig	1.16149e-08	-5.1767	6	88	0.000424466	Down-regulated
IRAK2	Pig	1.20272e-08	-2.28597	149	354	0.000439533	Down-regulated
COL1A1	Pig	1.24113e-08	-2.3706	124	319	0.000453572	Down-regulated
PAG1	Pig	1.26619e-08	-1.3328	254	487	0.000462729	Down-regulated
DNM1	Pig	1.52083e-08	-5.61237	4	0.08	0.000555788	Down-regulated
HMCN2	Pig	1.54297e-08	-4.83021	4	0.08	0.000563879	Down-regulated
ENSSSCG00000010440	Pig	2.01146e-08	-1.14158	616	735	0.000735088	Down-regulated
PARD6G	Pig	2.13543e-08	-3.22334	43	186	0.000780394	Down-regulated
SNTB1	Pig	2.22075e-08	-1.59177	266	487	0.000811575	Down-regulated
LTBP4	Pig	2.51316e-08	-3.17415	0.04	177	0.000918435	Down-regulated
MFAP5	Pig	4.29965e-08	-3.68501	15	115	0.00157131	Down-regulated
STXBP6	Pig	4.64116e-08	-3.248	9	97	0.00169611	Down-regulated
SAMD4A	Pig	4.66067e-08	-1.8873	218	434	0.00170324	Down-regulated
PALM2AKAP2	Pig	5.28412e-08	-1.58114	544	655	0.00193108	Down-regulated
FILIP1	Pig	5.56273e-08	-3.55336	38	168	0.0020329	Down-regulated
ASPN	Pig	7.54322e-08	-2.36915	0.09	257	0.00275667	Down-regulated
PKD1	Pig	7.64662e-08	-1.74246	128	319	0.00279446	Down-regulated
TRPC3	Pig	8.55386e-08	-4.20692	13	106	0.00312601	Down-regulated
DOCK6	Pig	8.68081e-08	-2.43488	77	239	0.0031724	Down-regulated
COBLL1	Pig	9.40442e-08	-1.64856	439	584	0.00343685	Down-regulated
ENSSSCG00000007944	Pig	1.02332e-07	-2.51305	34	159	0.00373972	Down-regulated
APOLD1	Pig	1.53239e-07	-3.47273	45	177	0.00560011	Down-regulated
CADM1	Pig	1.69318e-07	-5.02896	2	62	0.00618772	Down-regulated
ND3	Pig	1.71997e-07	-5.38157	2	62	0.00628561	Down-regulated
ENSSSCG00000049691	Pig	1.89419e-07	-1.38391	324	513	0.00692231	Down-regulated
CRIM1	Pig	2.64083e-07	-1.9016	183	372	0.00965092	Down-regulated
ENSSSCG00000008137	Pig	3.06641e-07	-1.63748	318	504	0.0112062	Down-regulated
LDB2	Pig	3.22148e-07	-1.16744	0.64	726	0.0117729	Down-regulated
ALDH1A2	Pig	3.49187e-07	-3.15744	15	106	0.012761	Down-regulated
PLEKHG3	Pig	4.18365e-07	-2.15437	56	195	0.0152891	Down-regulated
CLIC4	Pig	4.18705e-07	-1.04498	465	637	0.0153016	Down-regulated
SULF2	Pig	4.44002e-07	-3.40317	26	133	0.0162261	Down-regulated
phTBM	Pig	6.26122e-07	-5.1093	8	0.08	0.0228816	Down-regulated
TRPC1	Pig	6.54496e-07	-1.74468	247	434	0.0239185	Down-regulated
NCALD	Pig	7.2663e-07	-1.41308	397	558	0.0265547	Down-regulated
ENPP1	Pig	7.56276e-07	-1.39113	286	469	0.0276381	Down-regulated
MGAT5	Pig	7.58966e-07	-1.76082	237	416	0.0277364	Down-regulated
ND4	Pig	8.17974e-07	-3.54271	32	142	0.0298929	Down-regulated
PANK4	Pig	9.37167e-07	-3.5216	17	106	0.0342488	Down-regulated
DUSP16	Pig	9.61057e-07	-1.46726	313	487	0.0351218	Down-regulated
PLEKHM2	Pig	1.00102e-06	-2.08712	75	221	0.0365824	Down-regulated
SAMD5	Pig	1.2793e-06	-3.521	6	71	0.0467521	Down-regulated

## Sheet: SMC
gene	Species	p_val	avg_log2FC	pct. 1	pct.2	p_val_adj	level
CD55	Human	2.71343e-07	-7.82903	0	0.9	0.00991624	Down-regulated
