# Supplementary material for: Integrated Molecular Profiling of Preclinical and Clinical Cardiac Xenotransplants
Source: Research Square preprint supplement (doi:10.21203/rs.3.rs-8406985/v1), 2026-02-04
Supplement: Supplementary file 24 [file a97d69d6051d054310bd2ff0.xlsx]

## Sheet: Sheet1
sample	cell_state	count	proportion	percentage
xHTx patient 1	MO_VCAN+	10	0.0326797	3.26797
xHTx patient 1	MP_ISG	56	0.183007	18.3007
xHTx patient 1	MP_LYVE1+	72	0.235294	23.5294
xHTx patient 1	MP_NFKB	17	0.0555556	5.55556
xHTx patient 1	MP_TREM2	109	0.356209	35.6209
xHTx patient 1	MP_trans	41	0.133987	13.3987
xHTx patient 1	Unassign	1	0.00326797	0.326797
xHTx patient 2	MO_VCAN+	460	0.208333	20.8333
xHTx patient 2	MP_ISG	362	0.163949	16.3949
xHTx patient 2	MP_LYVE1+	294	0.133152	13.3152
xHTx patient 2	MP_NFKB	130	0.0588768	5.88768
xHTx patient 2	MP_TREM2	603	0.273098	27.3098
xHTx patient 2	MP_trans	326	0.147645	14.7645
xHTx patient 2	Unassign	33	0.0149457	1.49457
