# Supplementary material for: Integrated Molecular Profiling of Preclinical and Clinical Cardiac Xenotransplants
Source: Research Square preprint supplement (doi:10.21203/rs.3.rs-8406985/v1), 2026-02-04
Supplement: Supplementary file 25 [file ac827051303de58bfd1f0bfb.xlsx]

## Sheet: MP_trans
Gene	scores	log2FC	pvals	FDR
Homo_sapiens_AOAH	5.24259	0.670345	1.58342e-07	0.000263027

## Sheet: Mo_VCAN
Gene	scores	log2FC	pvals	FDR
Homo_sapiens_HIF1A-AS3	17.6724	2.54121	6.8457e-70	2.50176e-65
Homo_sapiens_VCAN	15.0792	2.51046	2.21973e-51	4.056e-47
Homo_sapiens_SLC2A3	15.051	1.84376	3.40231e-51	4.14458e-47
Homo_sapiens_PIK3CB	12.8952	1.44567	4.78894e-38	4.3753e-34
Homo_sapiens_FAM13A	12.3523	1.96294	4.73477e-35	3.46065e-31
Homo_sapiens_GBE1	11.8703	1.87731	1.68772e-32	1.02796e-28
Homo_sapiens_LUCAT1	10.6286	1.33075	2.19422e-26	1.14554e-22
Homo_sapiens_NDRG1	10.5469	2.44238	5.2519e-26	2.39913e-22
Homo_sapiens_NAMPT	10.0343	1.39136	1.07714e-23	4.37379e-20
Homo_sapiens_HIF1A	9.69007	1.22472	3.32291e-22	1.21436e-18
Homo_sapiens_P4HA1	9.59701	1.31034	8.22959e-22	2.7341e-18
Homo_sapiens_TBC1D22A	9.27843	0.729058	1.71992e-20	5.23787e-17
Homo_sapiens_ARHGAP24	9.18044	0.900765	4.29347e-20	1.20696e-16
Homo_sapiens_SLC25A37	8.83465	1.31628	1.00409e-18	2.44631e-15
Homo_sapiens_DOCK4	8.57901	0.61152	9.56958e-18	2.18575e-14
Homo_sapiens_ENSG00000286162	8.41417	1.60755	3.95697e-17	8.50633e-14
Homo_sapiens_SULF2	8.38517	1.32594	5.0654e-17	1.02842e-13
Homo_sapiens_HK2	8.3291	1.76754	8.14564e-17	1.56675e-13
Homo_sapiens_ZNF292	7.86468	0.867621	3.70052e-15	6.76177e-12
Homo_sapiens_EGLN3	7.83088	1.61476	4.8445e-15	8.43059e-12
Homo_sapiens_DOCK8	7.55177	0.534433	4.29383e-14	7.13263e-11
Homo_sapiens_CCNY	7.42946	0.866954	1.09041e-13	1.73256e-10
Homo_sapiens_ADAM28	7.32801	1.08262	2.3359e-13	3.55689e-10
Homo_sapiens_FOXO3	7.15606	0.874942	8.30316e-13	1.21376e-09
Homo_sapiens_FNDC3B	6.9323	0.602053	4.14057e-12	5.0439e-09
Homo_sapiens_BNIP3L	6.891	1.00931	5.54013e-12	6.5311e-09
Homo_sapiens_ESYT2	6.81563	1.10787	9.38528e-12	1.03935e-08
Homo_sapiens_PHF21A	6.80167	0.687635	1.0341e-11	1.11151e-08
Homo_sapiens_PFKFB3	6.65537	0.778425	2.8259e-11	2.79115e-08
Homo_sapiens_PLIN2	6.54138	1.02646	6.09552e-11	5.7388e-08
Homo_sapiens_FTH1	6.54067	0.671902	6.12432e-11	5.7388e-08
Homo_sapiens_RAPGEF1	6.46985	0.629127	9.81037e-11	8.80167e-08
Homo_sapiens_PDE3B	6.46886	0.966083	9.87463e-11	8.80167e-08
Homo_sapiens_IL1R2	6.46118	0.930949	1.03892e-10	9.03985e-08
Homo_sapiens_SAMSN1	6.44687	0.735747	1.14184e-10	9.70428e-08
Homo_sapiens_TMEM51	6.24123	0.760838	4.34156e-10	3.44918e-07
Homo_sapiens_PGK1	6.23301	1.32523	4.57542e-10	3.55763e-07
Homo_sapiens_CYTIP	6.22132	1.19175	4.93001e-10	3.75349e-07
Homo_sapiens_SPP1	6.08699	0.654205	1.15052e-09	8.40914e-07
Homo_sapiens_RIC1	5.99893	0.715712	1.98617e-09	1.42323e-06
Homo_sapiens_MXI1	5.94777	1.42267	2.71821e-09	1.83958e-06
Homo_sapiens_ERO1A	5.91517	1.29422	3.31523e-09	2.16348e-06
Homo_sapiens_RNF149	5.84505	0.576266	5.06408e-09	3.24679e-06
Homo_sapiens_FOSL2	5.81228	1.39634	6.16269e-09	3.88303e-06
Homo_sapiens_PDK1	5.75256	1.75271	8.79047e-09	5.44488e-06
Homo_sapiens_SRGN	5.73201	0.679222	9.92465e-09	6.04494e-06
Homo_sapiens_TFRC	5.63035	1.41098	1.79842e-08	1.07743e-05
Homo_sapiens_VEGFA	5.62528	1.64167	1.8521e-08	1.07898e-05
Homo_sapiens_ELL2	5.62454	0.662771	1.86005e-08	1.07898e-05
Homo_sapiens_PCOLCE2	5.60389	1.24983	2.09595e-08	1.19682e-05
Homo_sapiens_GNA13	5.58504	0.790257	2.33651e-08	1.31366e-05
Homo_sapiens_SIPA1L1	5.47182	0.502497	4.45438e-08	2.3939e-05
Homo_sapiens_GPI	5.36942	1.1958	7.89903e-08	4.12386e-05
Homo_sapiens_GRK3	5.25877	0.556115	1.45018e-07	7.36068e-05
Homo_sapiens_IFNGR2	5.24324	0.599405	1.57785e-07	7.89898e-05
Homo_sapiens_FLNB	5.22227	1.84901	1.76744e-07	8.61214e-05
Homo_sapiens_KDM3A	5.17452	1.01968	2.28494e-07	0.000109873
Homo_sapiens_FLT1	5.15733	1.26039	2.505e-07	0.000117366
Homo_sapiens_HDAC4	5.13862	0.590884	2.76769e-07	0.000128032
Homo_sapiens_CTNNB1	4.99925	0.715162	5.7553e-07	0.000253407
Homo_sapiens_FCGR2C	4.93537	0.802134	8.00001e-07	0.000348048
Homo_sapiens_STK17B	4.9212	1.35457	8.60143e-07	0.000369811
Homo_sapiens_CLEC2B	4.81348	1.44649	1.48323e-06	0.000615963
Homo_sapiens_SORL1	4.76859	0.875928	1.8552e-06	0.000753316
Homo_sapiens_EGLN1	4.67211	1.16429	2.98122e-06	0.00114418
Homo_sapiens_CAMK2D	4.6683	0.620748	3.03696e-06	0.00114418
Homo_sapiens_ZNF331	4.59984	1.5292	4.2282e-06	0.00157673
Homo_sapiens_ZDHHC20	4.55445	0.583331	5.25222e-06	0.00191942
Homo_sapiens_KDM4C	4.55223	0.530824	5.30796e-06	0.00192059
Homo_sapiens_RNASET2	4.52975	0.552066	5.90532e-06	0.00211578
Homo_sapiens_DENND4C	4.52207	0.504408	6.1238e-06	0.00217276
Homo_sapiens_PHC2	4.49395	0.611691	6.9914e-06	0.00245674
Homo_sapiens_RGS1	4.48944	0.693576	7.14108e-06	0.00248543
Homo_sapiens_NPEPPS	4.461	0.77313	8.15769e-06	0.00281248
Homo_sapiens_PPARD	4.44895	1.15862	8.62903e-06	0.00294718
Homo_sapiens_PTEN	4.39194	0.50979	1.12345e-05	0.00380151
Homo_sapiens_TNS1	4.34261	0.545533	1.40803e-05	0.0046357
Homo_sapiens_NEDD9	4.324	1.51991	1.53225e-05	0.00496729
Homo_sapiens_DENND3	4.32347	0.608478	1.53593e-05	0.00496729
Homo_sapiens_KDM4B	4.32108	0.653298	1.5527e-05	0.0049775
Homo_sapiens_MAP3K2	4.28066	0.633121	1.86341e-05	0.00572254
Homo_sapiens_EREG	4.27837	3.61263	1.88268e-05	0.00573355
Homo_sapiens_PPP1CB	4.25187	0.859829	2.11993e-05	0.0062986
Homo_sapiens_DYRK1A	4.18879	0.569662	2.80439e-05	0.00813385
Homo_sapiens_TBL1X	4.18284	0.769032	2.8789e-05	0.0082842
Homo_sapiens_GBP5	4.12058	0.672407	3.77927e-05	0.0106241
Homo_sapiens_ZNF148	4.11487	0.594964	3.87402e-05	0.0108073
Homo_sapiens_PPP3CA	4.10814	0.518699	3.98863e-05	0.0110428
Homo_sapiens_SLC11A1	4.07491	0.509014	4.60325e-05	0.0123695
Homo_sapiens_BCAT1	4.06987	0.585386	4.70395e-05	0.0125479
Homo_sapiens_HPCAL1	4.00824	0.714282	6.11731e-05	0.0159684
Homo_sapiens_ZCCHC2	3.99668	0.534616	6.42366e-05	0.0166491
Homo_sapiens_SSBP2	3.98033	0.689218	6.88192e-05	0.0174653
Homo_sapiens_HIVEP2	3.9644	0.801461	7.35794e-05	0.0181687
Homo_sapiens_SLC16A10	3.94672	0.720533	7.92307e-05	0.0191754
Homo_sapiens_CHST15	3.93304	0.510172	8.38772e-05	0.02012
Homo_sapiens_PELI2	3.91634	0.696446	8.99032e-05	0.0213345
Homo_sapiens_ENO1	3.90693	0.811356	9.34753e-05	0.0220391
Homo_sapiens_CCNH	3.87085	0.775676	0.000108457	0.024928
Homo_sapiens_FHAD1	3.83998	0.824289	0.000123044	0.027757

## Sheet: MP_NFkB
Gene	scores	log2FC	pvals	FDR
Homo_sapiens_SLC39A8	10.9581	3.1752	6.07614e-28	2.22053e-23
Homo_sapiens_SOD2	10.7157	2.36893	8.59055e-27	1.56971e-22
Homo_sapiens_PSTPIP2	10.2487	1.65801	1.19949e-24	1.46118e-20
Homo_sapiens_RNF144B	9.29315	1.51729	1.49794e-20	1.36856e-16
Homo_sapiens_GCH1	8.15673	1.9326	3.44214e-16	2.51586e-12
Homo_sapiens_TNFAIP3	7.88107	1.81468	3.24582e-15	1.97697e-11
Homo_sapiens_GBP1	7.76028	1.89309	8.47405e-15	4.42406e-11
Homo_sapiens_LYN	7.6091	1.19084	2.76003e-14	1.26082e-10
Homo_sapiens_CD38	7.5149	1.38843	5.69564e-14	2.31275e-10
Homo_sapiens_B4GALT5	7.26178	1.50625	3.8203e-13	1.39613e-09
Homo_sapiens_DRAM1	7.10732	1.43447	1.18316e-12	3.93078e-09
Homo_sapiens_CD44	6.95052	1.59492	3.63935e-12	1.10833e-08
Homo_sapiens_LRRK2	6.67042	1.043	2.55081e-11	7.17071e-08
Homo_sapiens_ANKRD22	6.65794	2.06576	2.77685e-11	7.24856e-08
Homo_sapiens_JAK2	6.63921	1.03651	3.15374e-11	7.68356e-08
Homo_sapiens_ACSL1	6.53505	1.04369	6.35902e-11	1.45244e-07
Homo_sapiens_CYBB	6.47544	1.23583	9.45356e-11	2.03224e-07
Homo_sapiens_SAMSN1	6.44868	1.13217	1.12826e-10	2.29069e-07
Homo_sapiens_ENSG00000285744	6.40477	2.1047	1.50597e-10	2.89661e-07
Homo_sapiens_WARS1	6.38205	1.82718	1.74731e-10	3.19277e-07
Homo_sapiens_LIMK2	6.26273	1.50289	3.78307e-10	6.55899e-07
Homo_sapiens_GBP5	6.25605	1.25431	3.94849e-10	6.55899e-07
Homo_sapiens_GBP2	6.21102	1.24706	5.26402e-10	8.36407e-07
Homo_sapiens_NFKB1	6.15505	1.50616	7.50538e-10	1.14285e-06
Homo_sapiens_DENND5A	6.08087	1.01648	1.19535e-09	1.74737e-06
Homo_sapiens_PDE4B	6.04749	1.00463	1.47118e-09	2.06786e-06
Homo_sapiens_TRAF3	5.86739	1.19232	4.42711e-09	5.99217e-06
Homo_sapiens_RAPGEF2	5.78706	1.03573	7.16301e-09	9.34901e-06
Homo_sapiens_MCTP1	5.60268	0.821144	2.11062e-08	2.65975e-05
Homo_sapiens_PTPRJ	5.5823	0.765354	2.37352e-08	2.89134e-05
Homo_sapiens_FNDC3B	5.56169	0.762527	2.67167e-08	3.14956e-05
Homo_sapiens_CHST11	5.47516	0.699227	4.37125e-08	4.99211e-05
Homo_sapiens_CDC42SE2	5.4525	0.870265	4.96673e-08	5.50028e-05
Homo_sapiens_TANK	5.40759	0.961654	6.38789e-08	6.73557e-05
Homo_sapiens_ARHGAP31	5.40583	1.01344	6.45082e-08	6.73557e-05
Homo_sapiens_FLT1	5.39266	1.6116	6.94229e-08	7.04739e-05
Homo_sapiens_PLEK	5.33932	1.66704	9.32967e-08	9.21494e-05
Homo_sapiens_WSB1	5.2882	0.889074	1.23524e-07	0.000118794
Homo_sapiens_SUSD6	5.23879	0.919518	1.61636e-07	0.000151461
Homo_sapiens_CERS6	5.21273	0.89698	1.8608e-07	0.000170008
Homo_sapiens_XRN1	5.1584	0.882483	2.49074e-07	0.000219657
Homo_sapiens_B2M	5.15588	0.902155	2.52445e-07	0.000219657
Homo_sapiens_DMXL2	5.10593	0.705435	3.29164e-07	0.000278346
Homo_sapiens_FTH1	5.10254	0.76688	3.35128e-07	0.000278346
Homo_sapiens_MT2A	5.0927	1.57702	3.52997e-07	0.000286673
Homo_sapiens_APOL3	5.08099	1.64852	3.7547e-07	0.000298294
Homo_sapiens_CXCL10	5.07057	4.53939	3.96627e-07	0.000302532
Homo_sapiens_KYNU	5.07022	0.92245	3.9736e-07	0.000302532
Homo_sapiens_SLC8A1	5.05558	0.636095	4.29084e-07	0.000320018
Homo_sapiens_DENND1A	5.05008	0.701151	4.41633e-07	0.000322789
Homo_sapiens_HIVEP2	4.95464	1.34482	7.24648e-07	0.00051926
Homo_sapiens_ENSG00000227531	4.94755	1.01183	7.51518e-07	0.000528159
Homo_sapiens_BAZ1A	4.82782	0.793246	1.38038e-06	0.000951808
Homo_sapiens_TNFAIP8	4.81939	0.818695	1.44001e-06	0.000974538
Homo_sapiens_LCOR	4.75492	0.882323	1.98524e-06	0.0013191
Homo_sapiens_ARAP2	4.73384	1.06338	2.20308e-06	0.00143771
Homo_sapiens_RIPK2-DT	4.72928	1.35846	2.25322e-06	0.00144463
Homo_sapiens_SIK3	4.71206	0.893449	2.45223e-06	0.00154511
Homo_sapiens_PIK3AP1	4.69338	0.808974	2.68722e-06	0.00166448
Homo_sapiens_TMEM131L	4.61973	1.11583	3.84245e-06	0.002302
Homo_sapiens_UVRAG	4.59197	0.752035	4.39073e-06	0.00257427
Homo_sapiens_MBD2	4.58975	0.786548	4.43779e-06	0.00257427
Homo_sapiens_GBP4	4.58372	1.87806	4.56779e-06	0.00260828
Homo_sapiens_IRF1	4.57687	1.30355	4.71989e-06	0.00265367
Homo_sapiens_DOCK4	4.57341	0.562534	4.79842e-06	0.00265694
Homo_sapiens_CFLAR	4.53606	0.872167	5.73154e-06	0.00308028
Homo_sapiens_ABI1	4.5261	0.74583	6.00809e-06	0.00318211
Homo_sapiens_PTPN2	4.49829	0.898569	6.85013e-06	0.00357626
Homo_sapiens_EPSTI1	4.46913	0.653491	7.85368e-06	0.00404243
Homo_sapiens_GSAP	4.4593	0.735054	8.22286e-06	0.00417367
Homo_sapiens_CLIC4	4.43916	1.2723	9.03122e-06	0.00452118
Homo_sapiens_CD74	4.43459	0.864448	9.2248e-06	0.00455568
Homo_sapiens_TLR2	4.40684	0.674357	1.04891e-05	0.00511101
Homo_sapiens_SNX10	4.39911	0.74052	1.08697e-05	0.00522675
Homo_sapiens_ZFAND3	4.38857	0.547968	1.14099e-05	0.00541527
Homo_sapiens_MAILR	4.36913	2.65492	1.24743e-05	0.00584452
Homo_sapiens_PALM2AKAP2	4.35285	1.04039	1.34378e-05	0.00621625
Homo_sapiens_UTRN	4.32422	0.53592	1.53072e-05	0.00699252
Homo_sapiens_ARID5B	4.28991	0.801908	1.78746e-05	0.00806452
Homo_sapiens_TNIK	4.28201	0.898706	1.85216e-05	0.00825455
Homo_sapiens_NAMPT	4.26795	0.838526	1.97275e-05	0.00868602
Homo_sapiens_RHOQ	4.23265	0.851736	2.30957e-05	0.010048
Homo_sapiens_TCF7L2	4.20173	1.08599	2.6488e-05	0.0113883
Homo_sapiens_UBE2E1	4.19886	0.842446	2.68258e-05	0.0113994
Homo_sapiens_UBE2E2	4.1714	0.663927	3.0273e-05	0.0126172
Homo_sapiens_PEAK1	4.16484	0.717121	3.11564e-05	0.0127934
Homo_sapiens_SLAMF7	4.13129	2.01709	3.60725e-05	0.0146474
Homo_sapiens_ITPR2	4.09177	0.590142	4.28087e-05	0.0171601
Homo_sapiens_RGL1	4.08967	0.665176	4.31995e-05	0.0171601
Homo_sapiens_TNFAIP2	4.07023	0.858845	4.69674e-05	0.0184562
Homo_sapiens_PAG1	4.02426	0.81051	5.71537e-05	0.0219861
Homo_sapiens_ACTB	4.01314	0.947932	5.99164e-05	0.0228088
Homo_sapiens_PCNX1	3.99815	0.657329	6.38393e-05	0.0240516
Homo_sapiens_B4GALT1	3.97754	1.07417	6.96317e-05	0.0259662
Homo_sapiens_NR3C1	3.97332	0.680381	7.08762e-05	0.0261634
Homo_sapiens_SRGN	3.95834	0.591886	7.54737e-05	0.0275819
Homo_sapiens_TMEM165	3.94516	0.732326	7.9746e-05	0.0288546
Homo_sapiens_RNF213	3.91776	0.51188	8.93756e-05	0.0320219
Homo_sapiens_PTPN1	3.91319	0.818698	9.10836e-05	0.032317
Homo_sapiens_CUL1	3.90939	0.810002	9.25305e-05	0.0323301

## Sheet: MP_TREM2
Gene	scores	log2FC	pvals	FDR
Homo_sapiens_MYO1E	13.1388	1.49163	1.97246e-39	7.20835e-35
Homo_sapiens_TPRG1	13.0775	1.66755	4.42499e-39	8.08557e-35
Homo_sapiens_SPP1	9.88201	1.12214	4.9824e-23	6.06939e-19
Homo_sapiens_ALCAM	9.74562	0.979313	1.92596e-22	1.75961e-18
Homo_sapiens_MITF	8.75356	0.978116	2.06725e-18	1.51095e-14
Homo_sapiens_DTNA	8.63028	1.6671	6.11994e-18	3.72755e-14
Homo_sapiens_MSR1	8.4595	0.728628	2.68518e-17	1.34796e-13
Homo_sapiens_FNIP2	8.4485	0.95523	2.95078e-17	1.34796e-13
Homo_sapiens_ARHGAP10	8.24603	0.955861	1.63737e-16	6.64863e-13
Homo_sapiens_SNTB1	7.97018	0.657111	1.58442e-15	5.26387e-12
Homo_sapiens_RASAL2	7.77702	1.71269	7.42531e-15	2.26132e-11
Homo_sapiens_NRP1	7.66256	1.24525	1.82269e-14	5.12386e-11
Homo_sapiens_SAMD4A	7.52147	0.745505	5.41625e-14	1.41384e-10
Homo_sapiens_VAC14	7.47263	0.94885	7.861e-14	1.9152e-10
Homo_sapiens_DDX60L	7.38838	0.752865	1.4863e-13	3.39479e-10
Homo_sapiens_PPARG	7.34624	0.896676	2.0386e-13	4.38239e-10
Homo_sapiens_ANXA2	7.31907	0.946492	2.49691e-13	5.06941e-10
Homo_sapiens_CAMK1D	7.22458	0.586676	5.02652e-13	9.66811e-10
Homo_sapiens_PSD3	7.1046	0.778267	1.20674e-12	2.20501e-09
Homo_sapiens_CDK6	7.09365	0.801231	1.30619e-12	2.27308e-09
Homo_sapiens_GLDN	7.08554	1.23786	1.38503e-12	2.30072e-09
Homo_sapiens_ITGAX	6.78368	0.939297	1.17154e-11	1.78392e-08
Homo_sapiens_TRIO	6.70797	0.534427	1.97353e-11	2.8849e-08
Homo_sapiens_NIBAN1	6.66882	1.0666	2.57872e-11	3.6246e-08
Homo_sapiens_SLC38A6	6.65433	0.695386	2.84585e-11	3.85191e-08
Homo_sapiens_BCL2	6.63162	1.37051	3.32026e-11	4.33353e-08
Homo_sapiens_MACROH2A1	6.55743	0.522344	5.47418e-11	6.89841e-08
Homo_sapiens_ASPH	6.39107	0.697906	1.64725e-10	1.9419e-07
Homo_sapiens_MYOF	6.38101	0.701028	1.75922e-10	2.00909e-07
Homo_sapiens_FRMD4A	6.23118	0.734098	4.62942e-10	4.97594e-07
Homo_sapiens_ENSG00000253557	6.15419	1.02074	7.54634e-10	7.83039e-07
Homo_sapiens_RPS6KA2	6.12739	0.910934	8.93347e-10	8.59141e-07
Homo_sapiens_LNCAROD	5.89364	0.980162	3.77779e-09	3.3673e-06
Homo_sapiens_SLC16A10	5.87541	0.655296	4.21807e-09	3.67022e-06
Homo_sapiens_SEMA3C	5.82467	1.31749	5.72258e-09	4.79745e-06
Homo_sapiens_P2RX7	5.82311	0.679669	5.7761e-09	4.79745e-06
Homo_sapiens_SOAT1	5.77637	0.733219	7.63289e-09	6.19875e-06
Homo_sapiens_CD109	5.52695	2.59572	3.25839e-08	2.48079e-05
Homo_sapiens_MGLL	5.51753	0.982272	3.43794e-08	2.56407e-05
Homo_sapiens_SDC2	5.26095	1.45738	1.43314e-07	9.69893e-05
Homo_sapiens_L3MBTL4	5.22256	0.556576	1.76466e-07	0.00011516
Homo_sapiens_NRP2	5.19893	0.598557	2.0044e-07	0.00012851
Homo_sapiens_UGCG	5.1538	1.16235	2.55257e-07	0.000156233
Homo_sapiens_ST18	5.15289	1.23464	2.56506e-07	0.000156233
Homo_sapiens_BCAT1	5.13798	0.548519	2.77711e-07	0.000166376
Homo_sapiens_CD83	5.11615	1.13287	3.11842e-07	0.000178067
Homo_sapiens_CBLB	5.10922	0.642328	3.23484e-07	0.000181873
Homo_sapiens_GPNMB	5.10517	0.612408	3.30499e-07	0.000183001
Homo_sapiens_ANXA4	5.08343	0.657703	3.70682e-07	0.000202188
Homo_sapiens_FGD6	5.07892	0.678864	3.79595e-07	0.000204004
Homo_sapiens_SPIRE1	5.05172	0.788424	4.37854e-07	0.000231751
Homo_sapiens_PTPRM	5.0161	0.812971	5.27298e-07	0.00026764
Homo_sapiens_KLF6	4.95579	0.606081	7.2036e-07	0.000360624
Homo_sapiens_SEPTIN9	4.95036	0.53248	7.40744e-07	0.000365817
Homo_sapiens_ZC3H12C	4.91972	0.899923	8.66674e-07	0.000416745
Homo_sapiens_EFR3A	4.88283	0.534568	1.04576e-06	0.000496326
Homo_sapiens_HS2ST1	4.86371	0.64083	1.15206e-06	0.00053977
Homo_sapiens_GCLC	4.8205	0.669258	1.43197e-06	0.000646064
Homo_sapiens_NPC1	4.79154	0.740295	1.65509e-06	0.000728737
Homo_sapiens_PDE8A	4.74656	0.590766	2.06903e-06	0.000900152
Homo_sapiens_SASH1	4.73406	0.76569	2.20072e-06	0.000935177
Homo_sapiens_CDYL2	4.73037	0.790039	2.2411e-06	0.000941389
Homo_sapiens_SYNE1	4.72711	0.661049	2.27739e-06	0.000945765
Homo_sapiens_RASGEF1B	4.70787	0.52613	2.5032e-06	0.00102786
Homo_sapiens_RSU1	4.68354	0.62752	2.81967e-06	0.00113236
Homo_sapiens_NHSL1	4.63826	0.649978	3.51359e-06	0.00135162
Homo_sapiens_GPR137B	4.62618	0.672647	3.72466e-06	0.00137493
Homo_sapiens_TANC2	4.61527	0.511929	3.9259e-06	0.00143287
Homo_sapiens_MFHAS1	4.61347	0.99253	3.96005e-06	0.00143287
Homo_sapiens_EML4	4.55614	0.502298	5.21011e-06	0.0018667
Homo_sapiens_CDYL	4.55175	0.545966	5.32005e-06	0.00188759
Homo_sapiens_VWA8	4.4493	0.561621	8.61492e-06	0.00297011
Homo_sapiens_MAFB	4.43759	0.60452	9.09696e-06	0.00307823
Homo_sapiens_LGALS3	4.39146	1.03103	1.12591e-05	0.00367379
Homo_sapiens_TM4SF19	4.37506	3.45524	1.214e-05	0.00392618
Homo_sapiens_PLEKHM2	4.36957	0.666607	1.24492e-05	0.00393629
Homo_sapiens_GGA2	4.33819	0.548098	1.43659e-05	0.00441176
Homo_sapiens_FAM20C	4.30661	1.04973	1.65779e-05	0.00498785
Homo_sapiens_ATP13A3	4.24773	0.582806	2.15951e-05	0.00616557
Homo_sapiens_RRBP1	4.23535	0.664172	2.28199e-05	0.00646476
Homo_sapiens_ENSG00000226149	4.13924	0.636896	3.4846e-05	0.00964733
Homo_sapiens_BCL2L1	4.13137	0.624789	3.60604e-05	0.00990849
Homo_sapiens_CTSD	4.08243	0.527547	4.45665e-05	0.0118021
Homo_sapiens_ANKRD28	4.07484	1.40839	4.60457e-05	0.0120196
Homo_sapiens_PSME4	4.04209	0.536533	5.2976e-05	0.0137306
Homo_sapiens_DGKH	3.99736	0.668526	6.4052e-05	0.0158161
Homo_sapiens_SLC41A2	3.97017	0.701414	7.18228e-05	0.0174984
Homo_sapiens_RALA	3.92809	0.599233	8.56241e-05	0.020188
Homo_sapiens_DOCK1	3.91604	0.798077	9.00141e-05	0.0209526
Homo_sapiens_PALM2AKAP2	3.90808	0.637681	9.30305e-05	0.0213824
Homo_sapiens_SLC4A8	3.88052	0.830356	0.000104233	0.0238074
Homo_sapiens_SHLD2	3.87259	0.570685	0.000107683	0.0242919
Homo_sapiens_RDX	3.86695	0.758862	0.000110204	0.0244085
Homo_sapiens_FPR3	3.86342	0.555271	0.000111813	0.0246156
Homo_sapiens_GALNT11	3.83832	0.520609	0.000123878	0.0268277
Homo_sapiens_SGK1	3.83796	0.968857	0.000124063	0.0268277
Homo_sapiens_THRB	3.83277	0.626183	0.000126707	0.027172
Homo_sapiens_PLD1	3.83039	0.576162	0.000127938	0.027172
Homo_sapiens_PCSK6	3.82789	3.76682	0.000129245	0.027172
Homo_sapiens_PAPSS1	3.82765	0.500225	0.000129373	0.027172

## Sheet: MP_LYVE1
Gene	scores	log2FC	pvals	FDR
Homo_sapiens_F13A1	16.2187	3.3705	3.72114e-59	1.35989e-54
Homo_sapiens_MRC1	14.047	1.74374	8.03605e-45	1.46839e-40
Homo_sapiens_RBPJ	13.68	1.455	1.33628e-42	1.62781e-38
Homo_sapiens_SLCO2B1	10.0149	1.16398	1.31057e-23	1.19737e-19
Homo_sapiens_SLC9A9	9.76906	1.0456	1.52862e-22	9.52414e-19
Homo_sapiens_AP2A2	9.76676	1.30656	1.56368e-22	9.52414e-19
Homo_sapiens_MYO5A	8.84967	0.968769	8.77799e-19	4.58274e-15
Homo_sapiens_MERTK	8.50821	0.89756	1.76637e-17	8.06898e-14
Homo_sapiens_LDLRAD4	8.00195	0.803987	1.22466e-15	4.97282e-12
Homo_sapiens_ITSN1	7.84026	1.10493	4.49628e-15	1.64316e-11
Homo_sapiens_STARD13	7.59688	0.906546	3.03351e-14	8.67516e-11
Homo_sapiens_CD163	7.56755	0.661687	3.80327e-14	9.92789e-11
Homo_sapiens_STAB1	7.54928	1.49106	4.37664e-14	1.0663e-10
Homo_sapiens_FRMD4A	7.43095	1.22996	1.07825e-13	2.46278e-10
Homo_sapiens_MARCO	7.34135	1.84685	2.11443e-13	4.54541e-10
Homo_sapiens_FRMD4B	6.94357	0.655981	3.82306e-12	7.35335e-09
Homo_sapiens_RBMS3	6.92869	1.46057	4.24747e-12	7.76119e-09
Homo_sapiens_IL18	6.84066	0.951909	7.88289e-12	1.37181e-08
Homo_sapiens_MS4A6A	6.22062	0.712409	4.95205e-10	6.96049e-07
Homo_sapiens_ATP8B4	6.09145	0.787567	1.11892e-09	1.51448e-06
Homo_sapiens_HCLS1	6.06936	0.848824	1.28417e-09	1.67608e-06
Homo_sapiens_RGL1	6.04475	0.784763	1.49645e-09	1.88579e-06
Homo_sapiens_ELMO1	6.02718	0.554739	1.66846e-09	2.03246e-06
Homo_sapiens_WWP1	5.94542	1.12805	2.75752e-09	3.14918e-06
Homo_sapiens_MEF2C	5.93708	0.78176	2.90139e-09	3.21307e-06
Homo_sapiens_ZBTB16	5.86638	0.74103	4.45403e-09	4.78742e-06
Homo_sapiens_SIAH2	5.72662	1.24359	1.0245e-08	1.06972e-05
Homo_sapiens_THRB	5.68646	1.17916	1.29698e-08	1.31661e-05
Homo_sapiens_DIRC3	5.43179	0.80176	5.57909e-08	5.51049e-05
Homo_sapiens_DISP1	5.41002	1.06768	6.30186e-08	5.90773e-05
Homo_sapiens_ME1	5.39405	0.718149	6.88881e-08	6.29379e-05
Homo_sapiens_DAB2	5.38014	0.820823	7.44275e-08	6.63403e-05
Homo_sapiens_DAAM2	5.33453	1.21622	9.57935e-08	8.33517e-05
Homo_sapiens_LILRB5	5.32541	2.30594	1.00724e-07	8.56036e-05
Homo_sapiens_ADAP2	5.31342	0.857576	1.07589e-07	8.93602e-05
Homo_sapiens_CHN2	5.06735	0.59643	4.03385e-07	0.000313653
Homo_sapiens_INPP5D	5.03876	0.630319	4.68552e-07	0.000356734
Homo_sapiens_TBC1D14	4.83465	0.793755	1.33379e-06	0.00095575
Homo_sapiens_ENSG00000290441	4.78296	1.46966	1.72731e-06	0.00121393
Homo_sapiens_SLA	4.70397	0.642685	2.55155e-06	0.00175936
Homo_sapiens_GOLGA4	4.5621	0.663808	5.0644e-06	0.00330497
Homo_sapiens_FGD4	4.54426	0.534823	5.5128e-06	0.00353448
Homo_sapiens_CPM	4.50192	0.526361	6.73421e-06	0.00417121
Homo_sapiens_FCHSD2	4.4639	0.527133	8.04799e-06	0.0049019
Homo_sapiens_ATRX	4.45939	0.692812	8.21952e-06	0.0049243
Homo_sapiens_RESF1	4.38518	0.736071	1.1589e-05	0.00661748
Homo_sapiens_PEAK1	4.37661	0.603482	1.20539e-05	0.00677706
Homo_sapiens_MS4A4E	4.36364	0.626997	1.27916e-05	0.00708287
Homo_sapiens_NFIA	4.34673	0.647621	1.38179e-05	0.00753696
Homo_sapiens_PRPF38B	4.32465	1.34199	1.52775e-05	0.00809155
Homo_sapiens_SON	4.1547	0.549778	3.25716e-05	0.0154588
Homo_sapiens_MAF	4.0831	1.10453	4.4438e-05	0.0205568
Homo_sapiens_SLC2A9	4.06425	0.60776	4.81868e-05	0.0212167
Homo_sapiens_NRP1	4.02857	0.860966	5.61168e-05	0.0238116
Homo_sapiens_CSGALNACT1	3.98767	0.840254	6.67249e-05	0.027094
Homo_sapiens_ITGA9	3.94662	1.05907	7.92636e-05	0.0317685
Homo_sapiens_APPL2	3.92001	0.798114	8.85448e-05	0.0344242
Homo_sapiens_CEMIP2	3.89461	0.709297	9.83551e-05	0.0374415
Homo_sapiens_SNX6	3.88125	0.526904	0.000103919	0.0391519
Homo_sapiens_NKTR	3.83338	0.666939	0.000126394	0.0448453
Homo_sapiens_MVB12B	3.81566	0.681745	0.000135821	0.046863
Homo_sapiens_AKAP9	3.80467	0.537537	0.000141991	0.0484961

## Sheet: MP_ISG
Gene	scores	log2FC	pvals	FDR
Homo_sapiens_MT1G	4.4111	2.8241	1.02849e-05	0.0223747
Homo_sapiens_MT2A	4.29424	1.21489	1.75294e-05	0.0305053
