# Supplementary material for: Integrated Molecular Profiling of Preclinical and Clinical Cardiac Xenotransplants
Source: Research Square preprint supplement (doi:10.21203/rs.3.rs-8406985/v1), 2026-02-04
Supplement: Supplementary file 26 [file ae0da6abe9fcd94e54165772.xlsx]

## Sheet: Arterial_EC
Gene	scores	log2FC	pvals	FDR
Sus_scrofa___LDB2	26.7251	2.43914	2.40283e-157	1.29335e-152
Sus_scrofa___MECOM	20.3237	1.58657	7.92893e-92	2.13391e-87
Sus_scrofa___PREX2	20.0813	1.55212	1.07509e-89	1.92893e-85
Sus_scrofa___SMAD6	19.1587	2.25355	8.1852e-82	1.10144e-77
Sus_scrofa___GULP1	18.7882	2.43903	9.44068e-79	1.01631e-74
Sus_scrofa___UTRN	18.5681	1.12549	5.81862e-77	5.21989e-73
Sus_scrofa___NEBL	18.1373	3.1262	1.61849e-73	1.24452e-69
Sus_scrofa___CPXM2	17.2326	4.00066	1.51195e-66	1.01728e-62
Sus_scrofa___ITPRID2	16.5808	2.98846	9.58801e-62	5.16084e-58
Sus_scrofa___ATP13A3	15.7515	3.19238	6.70496e-56	3.28092e-52
Sus_scrofa___SOX5	14.8111	1.83723	1.24272e-49	5.57422e-46
Sus_scrofa___ARL15	14.7412	1.06345	3.50599e-49	1.45164e-45
Sus_scrofa___MYRIP	14.6695	2.88577	1.01068e-48	3.88578e-45
Sus_scrofa___ENSSSCG00000012362	14.3781	1.20715	7.10637e-47	2.39067e-43
Sus_scrofa___FOXP1	14.0842	1.0551	4.74943e-45	1.50378e-41
Sus_scrofa___EFNB2	14.0118	2.2673	1.31971e-44	3.73868e-41
Sus_scrofa___LIMA1	13.9594	1.92251	2.75896e-44	7.42519e-41
Sus_scrofa___ENSSSCG00000003909	13.5774	1.42406	5.45507e-42	1.33466e-38
Sus_scrofa___PDGFD	13.5065	1.19432	1.43235e-41	3.2124e-38
Sus_scrofa___CCSER1	13.5025	1.2722	1.51135e-41	3.254e-38
Sus_scrofa___DENND1A	13.1305	1.24756	2.20075e-39	4.08474e-36
Sus_scrofa___COL23A1	13.0205	5.15724	9.35895e-39	1.62502e-35
Sus_scrofa___TBC1D1	12.865	1.4856	7.08768e-38	1.19219e-34
Sus_scrofa___CDK14	12.8526	2.01161	8.31988e-38	1.33087e-34
Sus_scrofa___LTBP1	12.7676	1.5613	2.48659e-37	3.8241e-34
Sus_scrofa___LIMCH1	11.8179	1.86287	3.15325e-32	4.35197e-29
Sus_scrofa___EPAS1	11.6185	0.95768	3.31925e-31	4.15493e-28
Sus_scrofa___SASH1	11.6001	1.0559	4.11764e-31	5.03718e-28
Sus_scrofa___VEGFC	11.4384	1.75056	2.68881e-30	3.14625e-27
Sus_scrofa___PCSK5	11.4112	3.38335	3.67772e-30	4.1241e-27
Sus_scrofa___GJA5	11.3009	5.63997	1.29912e-29	1.39853e-26
Sus_scrofa___PLCG2	11.284	4.21584	1.57381e-29	1.66101e-26
Sus_scrofa___THSD7A	11.027	2.88791	2.83235e-28	2.77189e-25
Sus_scrofa___PTPRJ	10.9195	3.4392	9.30547e-28	8.63579e-25
Sus_scrofa___ENTPD1	10.875	1.98385	1.51636e-27	1.38339e-24
Sus_scrofa___BCAR3	10.8198	1.61734	2.7746e-27	2.4891e-24
Sus_scrofa___SOX13	10.3471	1.60452	4.31577e-25	3.57385e-22
Sus_scrofa___MAP4K3	10.0226	0.866364	1.21213e-23	9.88547e-21
Sus_scrofa___FRMD4B	9.98586	0.981261	1.75772e-23	1.4121e-20
Sus_scrofa___EVA1C	9.68057	1.40534	3.64658e-22	2.84465e-19
Sus_scrofa___ENSSSCG00000016687	9.59304	1.51	8.55249e-22	6.48375e-19
Sus_scrofa___FRMD3	9.45919	0.866118	3.10335e-21	2.32001e-18
Sus_scrofa___COBLL1	9.37487	1.10436	6.92631e-21	5.10706e-18
Sus_scrofa___PSD3	9.29399	1.51564	1.48614e-20	1.06657e-17
Sus_scrofa___SETBP1	9.24973	2.61029	2.25049e-20	1.59388e-17
Sus_scrofa___FLNB	9.22668	1.10558	2.79151e-20	1.95138e-17
Sus_scrofa___LPCAT2	9.18408	2.663	4.15065e-20	2.82801e-17
Sus_scrofa___ABLIM1	9.1806	1.01102	4.28711e-20	2.88447e-17
Sus_scrofa___ENSSSCG00000000530	9.05985	2.86804	1.30626e-19	8.5745e-17
Sus_scrofa___SYNE2	8.79866	0.795544	1.38458e-18	8.7678e-16
Sus_scrofa___FGF2	8.68553	1.80472	3.76998e-18	2.35957e-15
Sus_scrofa___IL33	8.49589	2.37239	1.96425e-17	1.14922e-14
Sus_scrofa___MYOF	8.49245	2.39334	2.02321e-17	1.17098e-14
Sus_scrofa___TMEM100	8.46577	4.52158	2.5446e-17	1.45708e-14
Sus_scrofa___ITPR1	8.28685	0.901561	1.16289e-16	6.38714e-14
Sus_scrofa___RANBP6	8.27192	1.81619	1.31821e-16	7.16709e-14
Sus_scrofa___SNCAIP	8.04531	1.63863	8.60245e-16	4.53956e-13
Sus_scrofa___PDE10A	7.83264	0.994863	4.77729e-15	2.38113e-12
Sus_scrofa___RGS3	7.75493	1.45923	8.83907e-15	4.28623e-12
Sus_scrofa___PUS7	7.63275	1.55299	2.2979e-14	1.09457e-11
Sus_scrofa___SPECC1	7.60475	3.21023	2.85448e-14	1.34776e-11
Sus_scrofa___KCNN2	7.59486	1.94966	3.08118e-14	1.44215e-11
Sus_scrofa___TLN2	7.56724	1.87661	3.81239e-14	1.76901e-11
Sus_scrofa___GRK5	7.5655	0.763014	3.86367e-14	1.77749e-11
Sus_scrofa___TANC2	7.45087	1.92814	9.27296e-14	4.0912e-11
Sus_scrofa___GSN	7.43981	1.65259	1.00827e-13	4.41228e-11
Sus_scrofa___ENSSSCG00000016426	7.34932	2.26429	1.9922e-13	8.37751e-11
Sus_scrofa___LMBR1	7.24515	1.41169	4.31969e-13	1.7749e-10
Sus_scrofa___SIPA1L2	7.22598	1.30219	4.97501e-13	2.02867e-10
Sus_scrofa___SEMA3G	7.11547	3.41666	1.11534e-12	4.38208e-10
Sus_scrofa___SMAD7	7.02378	1.21898	2.15942e-12	8.18541e-10
Sus_scrofa___TSC22D1	7.01594	0.829044	2.28409e-12	8.59745e-10
Sus_scrofa___SMAD2	6.94418	1.08438	3.80674e-12	1.40343e-09
Sus_scrofa___MTUS1	6.92757	2.15829	4.28141e-12	1.5571e-09
Sus_scrofa___CDK19	6.87196	1.57986	6.33252e-12	2.28761e-09
Sus_scrofa___PALMD	6.84329	1.50133	7.73948e-12	2.77723e-09
Sus_scrofa___ADAMTS1	6.72443	1.37056	1.76287e-11	6.12183e-09
Sus_scrofa___EFNA5	6.69643	2.81671	2.13568e-11	7.32198e-09
Sus_scrofa___ITGB5	6.60644	2.49732	3.93679e-11	1.30803e-08
Sus_scrofa___ENSSSCG00000015814	6.5773	0.808395	4.79055e-11	1.57229e-08
Sus_scrofa___ENSSSCG00000024950	6.57199	1.98255	4.9647e-11	1.61958e-08
Sus_scrofa___NOTCH4	6.48511	0.792124	8.86676e-11	2.87507e-08
Sus_scrofa___MAB21L3	6.46133	3.97078	1.03789e-10	3.34524e-08
Sus_scrofa___JAG2	6.45948	2.55623	1.05066e-10	3.36622e-08
Sus_scrofa___ZNF423	6.28676	0.794402	3.24157e-10	9.97032e-08
Sus_scrofa___BCR	6.26774	2.57765	3.66336e-10	1.10919e-07
Sus_scrofa___PDE3B	6.18064	2.61964	6.38435e-10	1.88815e-07
Sus_scrofa___TMTC1	6.10687	0.787326	1.01602e-09	2.94022e-07
Sus_scrofa___ARHGAP20	6.00121	2.43483	1.95851e-09	5.43395e-07
Sus_scrofa___SLC9A3R2	6.00001	0.975295	1.97302e-09	5.44614e-07
Sus_scrofa___PIK3C2B	5.99657	0.786214	2.01531e-09	5.53449e-07
Sus_scrofa___RDX	5.89166	0.832297	3.82332e-09	1.01878e-06
Sus_scrofa___ALPL	5.888	3.07011	3.90898e-09	1.03648e-06
Sus_scrofa___FN1	5.86078	2.38672	4.60693e-09	1.21555e-06
Sus_scrofa___STK17A	5.85654	1.47766	4.72597e-09	1.24088e-06
Sus_scrofa___KCNN3	5.84534	2.0014	5.05528e-09	1.3209e-06
Sus_scrofa___MERTK	5.82255	0.815876	5.79563e-09	1.49979e-06
Sus_scrofa___RALGAPA2	5.7795	1.06752	7.49244e-09	1.91132e-06
Sus_scrofa___SNX24	5.763	1.0026	8.26318e-09	2.09799e-06
Sus_scrofa___DEPTOR	5.72882	1.44317	1.01133e-08	2.54374e-06

## Sheet: Antiinflam_EC
Gene	scores	log2FC	pvals	FDR
Sus_scrofa___IL1R1	24.3603	3.73712	4.50871e-131	2.42686e-126
Sus_scrofa___ADGRG6	24.1469	3.68814	8.04437e-129	2.16498e-124
Sus_scrofa___FBN1	23.7603	1.72214	8.60448e-125	1.54382e-120
Sus_scrofa___SLCO2A1	23.4085	1.73066	3.502e-121	4.71247e-117
Sus_scrofa___LDB2	22.6467	1.35082	1.50473e-113	1.61987e-109
Sus_scrofa___SEMA6A	20.8042	1.49905	3.96237e-96	3.04684e-92
Sus_scrofa___PTPRB	20.403	1.01205	1.57119e-92	1.05714e-88
Sus_scrofa___HMCN1	20.298	1.27928	1.33835e-91	8.00421e-88
Sus_scrofa___LDLRAD3	19.4431	2.08091	3.33217e-84	1.49465e-80
Sus_scrofa___FOXP1	19.4335	1.0405	4.02359e-84	1.66595e-80
Sus_scrofa___ITGA9	18.9979	1.51798	1.77606e-80	6.82846e-77
Sus_scrofa___PELI2	18.1123	1.06721	2.54654e-73	9.13802e-70
Sus_scrofa___FLRT2	17.583	1.77176	3.32423e-69	1.11831e-65
Sus_scrofa___ENTPD1	17.1517	2.09421	6.10163e-66	1.93192e-62
Sus_scrofa___PGM5	16.9963	2.58079	8.74725e-65	2.61572e-61
Sus_scrofa___LHX6	16.9691	2.46895	1.39111e-64	3.94094e-61
Sus_scrofa___LRFN5	16.658	2.33565	2.64677e-62	6.78404e-59
Sus_scrofa___FRMD4B	16.6221	1.0531	4.8225e-62	1.17989e-58
Sus_scrofa___PBX1	16.6189	1.20318	5.0848e-62	1.18998e-58
Sus_scrofa___PKP4	15.3185	1.13522	5.75301e-53	1.29026e-49
Sus_scrofa___CALCRL	15.1887	0.899313	4.19853e-52	9.03961e-49
Sus_scrofa___VEGFC	14.326	1.56866	1.50467e-46	3.11502e-43
Sus_scrofa___GMDS	14.2987	1.35807	2.22878e-46	4.44319e-43
Sus_scrofa___FBXL7	14.1684	0.78176	1.43769e-45	2.66846e-42
Sus_scrofa___SNTB2	14.0183	0.883034	1.20393e-44	2.16009e-41
Sus_scrofa___SH3BP5	13.8717	1.23999	9.40225e-44	1.63253e-40
Sus_scrofa___GALNT18	13.7471	0.854246	5.30012e-43	8.64498e-40
Sus_scrofa___KLF12	13.6243	0.886394	2.87157e-42	4.54604e-39
Sus_scrofa___NCOA7	13.6158	0.842227	3.22421e-42	4.95846e-39
Sus_scrofa___PLAT	13.601	1.87303	3.94835e-42	5.90344e-39
Sus_scrofa___GHR	13.5542	1.15806	7.48601e-42	1.08903e-38
Sus_scrofa___ATG7	13.5057	1.21622	1.44771e-41	2.05065e-38
Sus_scrofa___ENSSSCG00000006156	13.3928	1.3285	6.66172e-41	9.19421e-38
Sus_scrofa___MCTP1	13.3554	2.5083	1.10106e-40	1.48165e-37
Sus_scrofa___VWF	13.2459	0.808382	4.76809e-40	6.25969e-37
Sus_scrofa___MTSS1	12.9616	1.19316	2.02106e-38	2.59013e-35
Sus_scrofa___NOS1AP	12.9152	1.68186	3.6925e-38	4.62215e-35
Sus_scrofa___CHN1	12.7729	2.89246	2.32196e-37	2.717e-34
Sus_scrofa___ITPR1	12.7126	0.836332	5.03218e-37	5.76302e-34
Sus_scrofa___ARHGEF3	12.7026	0.806691	5.721e-37	6.41539e-34
Sus_scrofa___RASGRF2	12.6692	0.822846	8.7597e-37	9.62245e-34
Sus_scrofa___ZBTB7C	12.5197	2.39219	5.82754e-36	6.27346e-33
Sus_scrofa___ZNF521	12.4631	1.12293	1.18702e-35	1.25279e-32
Sus_scrofa___LTBP1	12.3244	1.07714	6.69178e-35	6.67022e-32
Sus_scrofa___PRICKLE1	12.129	1.00195	7.41146e-34	7.12374e-31
Sus_scrofa___ENSSSCG00000049691	11.9533	1.02331	6.23904e-33	5.69191e-30
Sus_scrofa___CHST11	11.9005	0.890574	1.17654e-32	1.05547e-29
Sus_scrofa___MMP16	11.6874	1.99499	1.47774e-31	1.28292e-28
Sus_scrofa___ZNF423	11.4456	0.854872	2.47471e-30	2.04929e-27
Sus_scrofa___ARHGAP26	11.2323	0.762405	2.83163e-29	2.24141e-26
Sus_scrofa___TEK	11.0334	0.756756	2.6378e-28	2.05772e-25
Sus_scrofa___SLC8A1	10.8083	0.795059	3.14534e-27	2.3514e-24
Sus_scrofa___CNTLN	10.7847	0.83666	4.06645e-27	2.91841e-24
Sus_scrofa___SERTM1	10.7808	2.68316	4.24036e-27	3.00318e-24
Sus_scrofa___ENSSSCG00000026996	10.6582	1.21117	1.59657e-26	1.10175e-23
Sus_scrofa___LMCD1	10.4645	1.40534	1.25781e-25	8.35837e-23
Sus_scrofa___MYRIP	10.4225	1.7606	1.95799e-25	1.26977e-22
Sus_scrofa___LRRC1	10.3996	2.1432	2.48848e-25	1.59459e-22
Sus_scrofa___LIMCH1	10.2186	1.154	1.637e-24	9.79036e-22
Sus_scrofa___EML4	10.0861	0.758509	6.36233e-24	3.72238e-21
Sus_scrofa___SMOC1	9.97256	1.675	2.00976e-23	1.14306e-20
Sus_scrofa___NFAT5	9.97218	0.794764	2.01744e-23	1.14306e-20
Sus_scrofa___IL33	9.94957	2.00905	2.53268e-23	1.40541e-20
Sus_scrofa___WNK1	9.94266	0.804108	2.71468e-23	1.49103e-20
Sus_scrofa___CACNA2D1	9.76607	1.16352	1.57437e-22	8.39028e-20
Sus_scrofa___TNRC6C	9.48196	0.963967	2.49555e-21	1.26722e-18
Sus_scrofa___DAPK1	9.44686	0.886992	3.49136e-21	1.75632e-18
Sus_scrofa___ZCCHC24	9.23765	0.903591	2.51966e-20	1.17933e-17
Sus_scrofa___BICD1	9.01495	1.13978	1.96969e-19	8.90927e-17
Sus_scrofa___LYST	8.96412	0.896524	3.1276e-19	1.40288e-16
Sus_scrofa___NR2F2	8.94076	2.37412	3.86519e-19	1.70531e-16
Sus_scrofa___LIPC	8.89374	1.10791	5.90854e-19	2.56478e-16
Sus_scrofa___TNFRSF21	8.83569	0.897525	9.94845e-19	4.21642e-16
Sus_scrofa___NFKBIZ	8.72702	1.0628	2.61479e-18	1.09104e-15
Sus_scrofa___CAMK1D	8.70117	1.44779	3.28485e-18	1.3497e-15
Sus_scrofa___ENSSSCG00000043817	8.67007	1.04754	4.31866e-18	1.76103e-15
Sus_scrofa___RALGAPA2	8.62243	0.827472	6.55466e-18	2.63292e-15
Sus_scrofa___HRH1	8.49766	2.80207	1.93447e-17	7.491e-15
Sus_scrofa___RORA	8.39338	0.850253	4.72379e-17	1.79058e-14
Sus_scrofa___CDC14A	8.3764	1.26131	5.45703e-17	2.05406e-14
Sus_scrofa___DEPDC1B	8.33779	1.09667	7.56954e-17	2.82943e-14
Sus_scrofa___HDAC9	8.24426	0.865508	1.66188e-16	6.12689e-14
Sus_scrofa___LHFPL2	8.17129	0.989419	3.0511e-16	1.10965e-13
Sus_scrofa___BNC2	8.07351	1.64761	6.83063e-16	2.43487e-13
Sus_scrofa___DPYSL3	8.07249	1.59294	6.88779e-16	2.43909e-13
Sus_scrofa___RNF150	7.91596	0.840199	2.45359e-15	8.46584e-13
Sus_scrofa___MMP28	7.9052	2.70063	2.67511e-15	9.17136e-13
Sus_scrofa___TMEM245	7.86076	1.7669	3.81803e-15	1.27646e-12
Sus_scrofa___DOCK11	7.82267	2.82866	5.17138e-15	1.71824e-12
Sus_scrofa___SULF1	7.65624	1.06025	1.91457e-14	6.17089e-12
Sus_scrofa___MDFIC	7.59212	0.992604	3.14712e-14	9.90626e-12
Sus_scrofa___KCNB2	7.587	0.924781	3.27402e-14	1.02458e-11
Sus_scrofa___TPST2	7.5315	1.53205	5.01609e-14	1.5254e-11
Sus_scrofa___ENSSSCG00000005358	7.36749	1.05812	1.73876e-13	5.19949e-11
Sus_scrofa___TLN2	7.36357	1.41423	1.79053e-13	5.3247e-11
Sus_scrofa___PDE2A	7.35982	1.05042	1.84158e-13	5.44642e-11
Sus_scrofa___SH3BGRL2	7.25967	1.22424	3.88035e-13	1.1184e-10
Sus_scrofa___COL5A2	7.23994	0.805586	4.48874e-13	1.27836e-10
Sus_scrofa___ADAM15	7.18086	0.923204	6.92742e-13	1.932e-10
Sus_scrofa___FAM13C	7.06457	0.940492	1.61117e-12	4.37995e-10

## Sheet: Angiogenic_EC
Gene	scores	log2FC	pvals	FDR
Sus_scrofa___KIT	18.125	1.60924	2.02224e-73	1.08849e-68
Sus_scrofa___ARHGAP18	15.4679	2.00206	5.71152e-54	1.53714e-49
Sus_scrofa___CHST15	15.3851	1.42293	2.05992e-53	3.69591e-49
Sus_scrofa___SVIL	14.6104	1.09365	2.41276e-48	2.59739e-44
Sus_scrofa___ARHGEF28	14.5782	1.60018	3.86376e-48	3.46618e-44
Sus_scrofa___PLEKHG1	14.33	0.90245	1.42051e-46	1.09229e-42
Sus_scrofa___MYO10	14.1198	1.27462	2.86654e-45	1.92868e-41
Sus_scrofa___GALNT1	13.054	1.17357	6.03173e-39	3.24664e-35
Sus_scrofa___AUTS2	11.8697	0.843796	1.70125e-32	7.63097e-29
Sus_scrofa___SMAD1	11.7244	1.67088	9.55722e-32	3.95713e-28
Sus_scrofa___ENSSSCG00000009633	11.5215	0.866815	1.02791e-30	3.95204e-27
Sus_scrofa___SPRED2	11.1029	1.391	1.21373e-28	4.08315e-25
Sus_scrofa___ABLIM3	11.0108	0.790766	3.39026e-28	1.07344e-24
Sus_scrofa___PALD1	10.9958	1.61814	4.00369e-28	1.19724e-24
Sus_scrofa___CDKL1	10.6784	2.31342	1.28508e-26	3.29384e-23
Sus_scrofa___ADGRL2	10.5733	0.890371	3.96349e-26	9.69721e-23
Sus_scrofa___RCSD1	10.2622	1.36503	1.04294e-24	2.44074e-21
Sus_scrofa___CCDC85A	10.2197	0.850251	1.61843e-24	3.62974e-21
Sus_scrofa___MYO1E	9.71574	0.763043	2.5836e-22	5.15055e-19
Sus_scrofa___LAMA4	9.67146	0.937332	3.98651e-22	7.6635e-19
Sus_scrofa___NRP2	9.60272	0.989059	7.78648e-22	1.39705e-18
Sus_scrofa___MYO1D	9.51778	0.981235	1.76919e-21	3.07189e-18
Sus_scrofa___LAMB1	9.51196	1.1721	1.8711e-21	3.14731e-18
Sus_scrofa___RAPGEF5	9.46846	1.0856	2.83998e-21	4.63227e-18
Sus_scrofa___MYO1B	9.40892	1.27919	5.0126e-21	7.70881e-18
Sus_scrofa___PPP1R16B	9.03225	1.01984	1.68173e-19	2.38212e-16
Sus_scrofa___FILIP1	8.99231	1.10161	2.42086e-19	3.34115e-16
Sus_scrofa___ENSSSCG00000049691	8.92263	1.1682	4.55336e-19	6.12724e-16
Sus_scrofa___KCNB2	8.88316	1.3267	6.49863e-19	8.32846e-16
Sus_scrofa___TMEM150C	8.43459	1.16087	3.32373e-17	3.79345e-14
Sus_scrofa___CLEC1A	8.43253	1.27259	3.38286e-17	3.79345e-14
Sus_scrofa___NOX4	7.99377	1.0009	1.30869e-15	1.32908e-12
Sus_scrofa___ADAM19	7.39749	2.90653	1.3878e-13	1.2661e-10
Sus_scrofa___CHST1	7.22836	2.21137	4.88878e-13	4.10829e-10
Sus_scrofa___ABLIM1	7.01762	0.895601	2.2568e-12	1.84052e-09
Sus_scrofa___AFAP1L1	6.98447	0.790535	2.85933e-12	2.27551e-09
Sus_scrofa___RPS6KA2	6.73639	1.18919	1.62376e-11	1.19727e-08
Sus_scrofa___ANGPT2	6.47795	1.0295	9.29799e-11	6.17869e-08
Sus_scrofa___XYLT1	6.26246	1.10018	3.78963e-10	2.37187e-07
Sus_scrofa___SNTB1	6.22409	1.74123	4.84368e-10	2.92939e-07
Sus_scrofa___MACROD2	6.12752	0.804027	8.92593e-10	5.1661e-07
Sus_scrofa___FMNL2	6.06656	0.885614	1.30676e-09	7.32685e-07
Sus_scrofa___NID2	6.06281	0.840029	1.33763e-09	7.4226e-07
Sus_scrofa___SPSB4	5.82847	2.44873	5.59386e-09	2.84052e-06
Sus_scrofa___USP31	5.80846	1.28907	6.30518e-09	3.1718e-06
Sus_scrofa___COL25A1	5.7436	2.98466	9.26862e-09	4.59548e-06
Sus_scrofa___PXDN	5.71105	0.988543	1.1228e-08	5.44467e-06
Sus_scrofa___FAM126A	5.69005	0.800017	1.27006e-08	6.04974e-06
Sus_scrofa___MLXIP	5.67492	0.932	1.38753e-08	6.55135e-06
Sus_scrofa___SNED1	5.64277	1.42645	1.67333e-08	7.69819e-06
Sus_scrofa___COLEC12	5.6292	1.60128	1.81043e-08	8.2583e-06
Sus_scrofa___RASSF2	5.54093	3.33688	3.00871e-08	1.34956e-05
Sus_scrofa___N4BP3	5.49406	2.78251	3.92792e-08	1.73298e-05
Sus_scrofa___MYORG	5.47943	0.773545	4.26688e-08	1.85217e-05
Sus_scrofa___SPARCL1	4.91898	0.877066	8.69977e-07	0.000296376
Sus_scrofa___TBXA2R	4.89787	2.0707	9.68805e-07	0.000325918
Sus_scrofa___ENSSSCG00000009285	4.8842	2.46018	1.03848e-06	0.000345044
Sus_scrofa___UBAC2	4.8648	0.988011	1.14575e-06	0.000376043
Sus_scrofa___TSPAN15	4.80008	1.18356	1.58604e-06	0.000511197
Sus_scrofa___UNC5B	4.75393	1.15362	1.99498e-06	0.000627964
Sus_scrofa___SNCAIP	4.72757	1.0468	2.27227e-06	0.000702915
Sus_scrofa___FAM91A1	4.56607	1.07208	4.96961e-06	0.00137176
Sus_scrofa___JCAD	4.36987	0.80861	1.24322e-05	0.00323272
Sus_scrofa___PLXND1	4.35682	0.829468	1.31965e-05	0.00341496
Sus_scrofa___CTNNBIP1	4.24038	0.881218	2.23146e-05	0.00545958
Sus_scrofa___SUFU	4.23378	0.81039	2.29794e-05	0.00554802
Sus_scrofa___SHROOM2	4.22357	0.981954	2.40464e-05	0.0057235
Sus_scrofa___CYBRD1	4.20981	1.61226	2.55586e-05	0.00603384
Sus_scrofa___TP53I11	4.1056	1.71494	4.03271e-05	0.00904436
Sus_scrofa___ARHGAP28	4.07154	0.834932	4.6704e-05	0.0103452
Sus_scrofa___BCL6B	4.05875	1.06847	4.93367e-05	0.0108836
Sus_scrofa___NPSR1	3.98662	0.941104	6.70224e-05	0.0143727
Sus_scrofa___PDE4B	3.94416	0.937269	8.00788e-05	0.0169032
Sus_scrofa___KCNN3	3.9172	1.54512	8.95827e-05	0.0187622
Sus_scrofa___MAML3	3.91262	0.79569	9.12997e-05	0.0189741
Sus_scrofa___XXYLT1	3.73099	0.826924	0.000190726	0.0374673
Sus_scrofa___REPS2	3.72095	1.28925	0.000198472	0.0387063
Sus_scrofa___IGF1	3.70729	1.74292	0.000209492	0.0404228
Sus_scrofa___ZBTB7C	-3.64751	-2.40114	0.00026479	0.0494881
Sus_scrofa___PLSCR1	-3.65064	-0.88304	0.000261583	0.049059
Sus_scrofa___MX1	-3.68843	-0.842087	0.000225646	0.0432229
Sus_scrofa___FOXS1	-3.73909	-1.19089	0.000184691	0.0364145
Sus_scrofa___ENSSSCG00000032436	-3.78882	-1.43417	0.000151365	0.0305145
Sus_scrofa___ATP13A3	-3.90519	-1.75138	9.4151e-05	0.0194914
Sus_scrofa___LIMCH1	-3.92257	-0.835013	8.76096e-05	0.0184206
Sus_scrofa___TNRC6C	-4.05332	-0.778721	5.04955e-05	0.0110938
Sus_scrofa___ADGRG6	-4.10771	-2.25586	3.99602e-05	0.00899957
Sus_scrofa___ENSSSCG00000024973	-4.13601	-0.769452	3.53391e-05	0.00806001
Sus_scrofa___FLRT2	-4.15215	-0.971992	3.29367e-05	0.0076088
Sus_scrofa___KLF2	-4.16422	-1.01115	3.12421e-05	0.00724843
Sus_scrofa___FGF2	-4.20071	-1.24115	2.66083e-05	0.00625424
Sus_scrofa___ENSSSCG00000022925	-4.22272	-0.905162	2.41377e-05	0.0057235
Sus_scrofa___AQP1	-4.23372	-1.93749	2.29853e-05	0.00554802
Sus_scrofa___MYRIP	-4.27258	-2.36659	1.93224e-05	0.00481502
Sus_scrofa___ADAM15	-4.28271	-1.33439	1.8463e-05	0.00462227
Sus_scrofa___SOX13	-4.31126	-1.01704	1.62324e-05	0.00412135
Sus_scrofa___ISG12(A)	-4.43289	-1.07377	9.29793e-06	0.00244132
Sus_scrofa___PARP14	-4.45609	-0.971219	8.34683e-06	0.00221319
Sus_scrofa___RSAD2	-4.55181	-1.09841	5.31861e-06	0.00146061
Sus_scrofa___PLSCR4	-4.56831	-1.34935	4.91669e-06	0.00136415

## Sheet: Cap_EC
Gene	scores	log2FC	pvals	FDR
Sus_scrofa___ADGRF5	27.5284	1.43898	8.01747e-167	4.31548e-162
Sus_scrofa___FOXN3	23.8189	1.21468	2.12807e-125	5.72728e-121
Sus_scrofa___LRMDA	23.0792	1.19863	7.49957e-118	1.34557e-113
Sus_scrofa___FRYL	22.926	1.07925	2.5581e-116	3.44231e-112
Sus_scrofa___ABLIM3	22.8504	1.19638	1.44778e-115	1.55856e-111
Sus_scrofa___CCDC85A	21.9483	1.34893	8.98714e-107	8.06236e-103
Sus_scrofa___ENSSSCG00000012362	21.8215	1.22498	1.45162e-105	1.11621e-101
Sus_scrofa___ARL15	21.2051	0.987414	8.56408e-100	5.76213e-96
Sus_scrofa___RASGRF2	18.4324	1.24463	7.22258e-76	3.88762e-72
Sus_scrofa___EPAS1	17.3258	0.978967	3.00418e-67	1.47003e-63
Sus_scrofa___CD36	17.0591	1.13231	2.98934e-65	1.34087e-61
Sus_scrofa___AUTS2	17.0454	0.853884	3.7836e-65	1.56658e-61
Sus_scrofa___RAPGEF1	16.5482	1.21436	1.65056e-61	6.34595e-58
Sus_scrofa___MCC	16.5242	0.781109	2.45611e-61	8.81352e-58
Sus_scrofa___MECOM	16.4836	0.803738	4.81615e-61	1.62021e-57
Sus_scrofa___PPP1R16B	15.7756	1.36102	4.58258e-56	1.37034e-52
Sus_scrofa___GPIHBP1	15.3194	2.36211	5.67343e-53	1.60725e-49
Sus_scrofa___LNX1	15.2891	2.37389	9.04052e-53	2.43307e-49
Sus_scrofa___SEL1L3	15.1797	1.34197	4.81888e-52	1.23515e-48
Sus_scrofa___BTNL9	14.9904	2.93326	8.48215e-51	2.07527e-47
Sus_scrofa___CYYR1	14.6814	0.820378	8.47737e-49	1.95503e-45
Sus_scrofa___TSPAN18	14.6795	1.2842	8.71712e-49	1.95503e-45
Sus_scrofa___ENSSSCG00000003909	14.6561	1.17216	1.23068e-48	2.6497e-45
Sus_scrofa___TSPAN13	14.3684	1.22629	8.17182e-47	1.6291e-43
Sus_scrofa___FRMD3	13.8638	0.897056	1.05028e-43	1.94939e-40
Sus_scrofa___GALNT18	12.9285	0.883632	3.11002e-38	5.23125e-35
Sus_scrofa___FABP5	12.7861	0.881717	1.96064e-37	3.19799e-34
Sus_scrofa___AFDN	12.3717	0.809571	3.72024e-35	5.41205e-32
Sus_scrofa___TSC22D1	12.179	0.972322	4.01972e-34	5.69383e-31
Sus_scrofa___CLIC5	12.0153	0.840911	2.95209e-33	4.07434e-30
Sus_scrofa___JAM3	11.9055	1.13171	1.10825e-32	1.49132e-29
Sus_scrofa___STOX2	11.8061	0.7644	3.6318e-32	4.76793e-29
Sus_scrofa___CMTM8	11.5767	0.84642	5.40719e-31	6.76854e-28
Sus_scrofa___CHSY3	11.3904	0.983041	4.66819e-30	5.46239e-27
Sus_scrofa___SYBU	10.813	1.58788	2.98883e-27	3.21754e-24
Sus_scrofa___ARHGEF3	10.5481	0.795241	5.18151e-26	5.36346e-23
Sus_scrofa___DACH1	10.2395	0.888404	1.31962e-24	1.29145e-21
Sus_scrofa___EBF3	10.0231	1.32303	1.20605e-23	1.10029e-20
Sus_scrofa___CCDC68	9.9664	1.62539	2.13838e-23	1.91834e-20
Sus_scrofa___EFNB2	9.82258	1.36382	9.00131e-23	7.81459e-20
Sus_scrofa___RNF150	9.65365	1.20988	4.74351e-22	3.98944e-19
Sus_scrofa___SEMA6A	9.64525	0.755065	5.1484e-22	4.26335e-19
Sus_scrofa___MCF2L	9.25608	1.23413	2.12071e-20	1.56369e-17
Sus_scrofa___PRICKLE2	9.11184	1.24554	8.09985e-20	5.8131e-17
Sus_scrofa___GULP1	8.62558	0.980068	6.37696e-18	3.77194e-15
Sus_scrofa___TEC	8.61383	1.41202	7.06564e-18	4.13386e-15
Sus_scrofa___NOTCH4	8.46016	0.921072	2.67001e-17	1.5128e-14
Sus_scrofa___PPARG	8.20444	0.867249	2.31672e-16	1.21068e-13
Sus_scrofa___NOVA1	8.14694	0.928968	3.73259e-16	1.89538e-13
Sus_scrofa___EEPD1	8.05034	0.929172	8.2568e-16	4.04028e-13
Sus_scrofa___FMO1	7.99946	0.781295	1.24971e-15	6.06009e-13
Sus_scrofa___RNF125	6.97805	0.913143	2.99307e-12	1.02615e-09
Sus_scrofa___NAV3	6.84535	1.29409	7.62915e-12	2.48877e-09
Sus_scrofa___TCF15	6.81605	2.12373	9.3578e-12	3.03429e-09
Sus_scrofa___MFAP3L	6.70897	2.6303	1.96007e-11	5.89401e-09
Sus_scrofa___ENSSSCG00000043817	6.57534	0.940923	4.85406e-11	1.38241e-08
Sus_scrofa___GFOD1	6.527	1.13809	6.71018e-11	1.84276e-08
Sus_scrofa___TNFRSF11A	6.50738	0.769342	7.64725e-11	2.08945e-08
Sus_scrofa___ADGRG1	6.47836	0.89547	9.2723e-11	2.45857e-08
Sus_scrofa___ENSSSCG00000004081	6.37967	0.90786	1.77465e-10	4.52712e-08
Sus_scrofa___JAM2	6.2938	0.834403	3.09795e-10	7.68434e-08
Sus_scrofa___PTGER2	6.0636	2.40271	1.33112e-09	3.09002e-07
Sus_scrofa___PRKAR2B	5.75016	1.72464	8.91589e-09	1.82474e-06
Sus_scrofa___RGS3	5.74876	0.900559	8.98996e-09	1.83293e-06
Sus_scrofa___ENSSSCG00000026996	5.74522	0.871916	9.18003e-09	1.85761e-06
Sus_scrofa___ATOH8	5.47589	2.02038	4.3533e-08	7.90095e-06
Sus_scrofa___SPARCL1	5.2728	0.851441	1.34354e-07	2.22515e-05
Sus_scrofa___FAM13C	5.18448	0.867437	2.1662e-07	3.4193e-05
Sus_scrofa___LRRC36	5.15544	1.87285	2.53032e-07	3.90249e-05
Sus_scrofa___BICD1	5.07311	0.901203	3.91367e-07	5.80322e-05
Sus_scrofa___MYL2	4.82585	1.46291	1.39408e-06	0.000179517
Sus_scrofa___ST3GAL2	4.70201	1.00309	2.57609e-06	0.000306771
Sus_scrofa___ADAMTSL3	4.68432	1.23753	2.80885e-06	0.000332284
Sus_scrofa___ENSSSCG00000033570	4.58462	1.90395	4.54809e-06	0.000507895
Sus_scrofa___JCAD	4.54856	0.766886	5.40152e-06	0.000592143
Sus_scrofa___SLC6A6	4.53765	1.57167	5.68849e-06	0.000619815
Sus_scrofa___HGF	4.53272	0.826723	5.82299e-06	0.000633189
Sus_scrofa___INTS6L	4.50532	0.751279	6.62719e-06	0.000707768
Sus_scrofa___ZNF618	4.29356	1.06854	1.75832e-05	0.0016575
Sus_scrofa___FAM102B	4.23956	1.27403	2.23963e-05	0.00206776
Sus_scrofa___ENSSSCG00000022164	4.16158	0.879398	3.16055e-05	0.00280263
Sus_scrofa___MYH7	4.01251	1.34398	6.0077e-05	0.00500574
Sus_scrofa___GNPTAB	3.97397	1.13187	7.06843e-05	0.00581752
Sus_scrofa___DRAM1	3.94168	0.880905	8.09146e-05	0.00650223
Sus_scrofa___DEPTOR	3.73062	0.897593	0.000191012	0.0135104
Sus_scrofa___RFLNB	3.67683	1.87074	0.000236155	0.0161515
Sus_scrofa___ENSSSCG00000023014	3.63158	2.72496	0.000281694	0.0187273
Sus_scrofa___GALNT17	3.56824	1.90834	0.000359383	0.022572
Sus_scrofa___AQP1	3.53547	0.771896	0.000407055	0.025205
Sus_scrofa___SERINC5	3.5349	0.783948	0.000407933	0.0252094
Sus_scrofa___SGK1	3.49777	0.820164	0.000469163	0.0283425
Sus_scrofa___CLSTN1	3.41113	0.758416	0.000646933	0.0372426
Sus_scrofa___RASA3	-3.32944	-1.00559	0.000870206	0.0482386
Sus_scrofa___BNIP3	-3.33045	-1.51928	0.000867044	0.0481129
Sus_scrofa___PRRG1	-3.33739	-0.934095	0.000845691	0.0472201
Sus_scrofa___RNF19B	-3.33909	-1.50933	0.000840529	0.0469806
Sus_scrofa___ASPH	-3.34753	-1.32255	0.000815343	0.0457153
Sus_scrofa___TTC27	-3.3484	-1.0538	0.000812801	0.0456202
Sus_scrofa___NR2F2	-3.34842	-1.69372	0.000812749	0.0456202
Sus_scrofa___DGKI	-3.34989	-0.915027	0.00080843	0.0455173

## Sheet: Cap_EC_ISG
Gene	scores	log2FC	pvals	FDR
Sus_scrofa___MX2	22.5114	1.80058	3.21265e-112	1.72924e-107
Sus_scrofa___ENSSSCG00000034570	18.2464	1.84054	2.20846e-74	5.94363e-70
Sus_scrofa___ENSSSCG00000001229	18.1569	1.09224	1.13177e-73	2.03063e-69
Sus_scrofa___RSAD2	17.3256	2.15753	3.01305e-67	4.05451e-63
Sus_scrofa___HERC6	16.6585	1.09923	2.624e-62	2.82479e-58
Sus_scrofa___OAS2	16.18	1.29513	6.98338e-59	6.26479e-55
Sus_scrofa___ENSSSCG00000017146	16.0856	1.24301	3.21819e-58	2.47461e-54
Sus_scrofa___HERC5	15.8784	1.64207	8.93656e-57	6.01274e-53
Sus_scrofa___ISG12(A)	15.6243	1.91179	4.97129e-55	2.97316e-51
Sus_scrofa___ISG15	15.3795	2.00321	2.24661e-53	1.20926e-49
Sus_scrofa___PARP14	15.2558	1.72421	1.50606e-52	7.36954e-49
Sus_scrofa___ZNFX1	14.5982	1.44533	2.88302e-48	1.29318e-44
Sus_scrofa___CXCL10	14.5236	2.8995	8.59063e-48	3.55692e-44
Sus_scrofa___MX1	14.3124	1.78278	1.83076e-46	7.03874e-43
Sus_scrofa___CD36	13.3106	1.02029	2.0092e-40	7.18427e-37
Sus_scrofa___ENSSSCG00000001341	13.306	1.00172	2.13555e-40	7.18427e-37
Sus_scrofa___EIF2AK2	13.279	1.13511	3.06657e-40	9.70948e-37
Sus_scrofa___NLRC5	12.7562	1.12114	2.87956e-37	8.61084e-34
Sus_scrofa___ENSSSCG00000016263	12.7166	0.896797	4.78074e-37	1.35436e-33
Sus_scrofa___FABP5	12.6642	1.00445	9.34062e-37	2.51384e-33
Sus_scrofa___STAT1	12.6445	1.20526	1.19973e-36	3.07508e-33
Sus_scrofa___BST2	12.626	1.55351	1.51877e-36	3.71588e-33
Sus_scrofa___RGMB	12.2868	1.60156	1.06668e-34	2.49631e-31
Sus_scrofa___IFIT1	12.0267	1.53047	2.57168e-33	5.32397e-30
Sus_scrofa___ENSSSCG00000014565	11.9089	1.81358	1.06408e-32	2.1213e-29
Sus_scrofa___FABP4	11.8487	1.46754	2.18592e-32	4.20211e-29
Sus_scrofa___ENSSSCG00000024973	11.7475	1.32851	7.27582e-32	1.30543e-28
Sus_scrofa___DDX60	11.7318	1.69942	8.76014e-32	1.52104e-28
Sus_scrofa___SETX	11.7035	0.85783	1.22262e-31	2.05653e-28
Sus_scrofa___IFIH1	11.5371	1.3385	8.57577e-31	1.39879e-27
Sus_scrofa___B2M	11.5268	0.865649	9.66171e-31	1.52956e-27
Sus_scrofa___ENSSSCG00000032436	11.4737	1.95569	1.78826e-30	2.75014e-27
Sus_scrofa___EPSTI1	11.3115	1.82116	1.15162e-29	1.67533e-26
Sus_scrofa___GHSR	11.2119	1.43201	3.56336e-29	5.04741e-26
Sus_scrofa___PLPP1	10.0327	0.774451	1.09524e-23	1.47381e-20
Sus_scrofa___PML	9.976	1.1578	1.94144e-23	2.54878e-20
Sus_scrofa___IFI44	9.86084	1.23327	6.15312e-23	7.70227e-20
Sus_scrofa___ID3	9.70327	1.40839	2.92002e-22	3.57212e-19
Sus_scrofa___SNX10	9.68376	1.43812	3.53467e-22	4.22794e-19
Sus_scrofa___PHF11	9.60887	0.80962	7.33518e-22	8.4005e-19
Sus_scrofa___IFI44L	9.53293	0.984568	1.52909e-21	1.71469e-18
Sus_scrofa___H3-5	9.35649	1.00403	8.24286e-21	8.8736e-18
Sus_scrofa___PARP12	9.04423	1.03353	1.50718e-19	1.50232e-16
Sus_scrofa___FOXS1	8.82547	1.44906	1.09e-18	1.0293e-15
Sus_scrofa___ENSSSCG00000030801	8.77295	1.43669	1.74048e-18	1.61523e-15
Sus_scrofa___ID1	8.71893	1.30811	2.80848e-18	2.56219e-15
Sus_scrofa___CAMK2D	8.65333	0.984803	5.00167e-18	4.41344e-15
Sus_scrofa___SAMD9	8.45851	1.22838	2.7081e-17	2.27759e-14
Sus_scrofa___UBE2L6	8.31304	1.77195	9.32783e-17	7.49373e-14
Sus_scrofa___ZBP1	8.27312	1.47746	1.30501e-16	1.03299e-13
Sus_scrofa___TXNIP	8.25662	1.053	1.49862e-16	1.16905e-13
Sus_scrofa___AQP1	8.18657	1.64193	2.68784e-16	2.06679e-13
Sus_scrofa___ATAD1	8.11811	0.984202	4.73493e-16	3.53976e-13
Sus_scrofa___GBP2	8.1116	1.08389	4.99583e-16	3.68364e-13
Sus_scrofa___CLEC2B	8.05001	0.826773	8.27908e-16	6.02202e-13
Sus_scrofa___ENSSSCG00000010893	7.77937	1.39741	7.28862e-15	4.96604e-12
Sus_scrofa___USP25	7.59243	0.939173	3.13968e-14	2.08638e-11
Sus_scrofa___FBXO39	7.5874	0.846837	3.264e-14	2.14253e-11
Sus_scrofa___ENSSSCG00000014672	7.57804	1.48463	3.50804e-14	2.27498e-11
Sus_scrofa___ENSSSCG00000033089	7.55929	1.67514	4.05279e-14	2.59697e-11
Sus_scrofa___DNAJC13	7.53142	0.832199	5.01918e-14	3.14142e-11
Sus_scrofa___ENSSSCG00000004081	7.40274	0.97747	1.33401e-13	7.89061e-11
Sus_scrofa___USP15	7.35833	0.793571	1.86222e-13	1.08952e-10
Sus_scrofa___LIPA	7.33878	1.26203	2.15542e-13	1.23423e-10
Sus_scrofa___PLVAP	7.32275	0.750047	2.42942e-13	1.37649e-10
Sus_scrofa___TRIM22	7.29177	1.39227	3.05916e-13	1.71523e-10
Sus_scrofa___WFDC1	7.1929	1.17097	6.34292e-13	3.48382e-10
Sus_scrofa___CEMIP2	7.15143	0.754251	8.58765e-13	4.66908e-10
Sus_scrofa___CXCL2	7.06305	0.823019	1.62885e-12	8.59552e-10
Sus_scrofa___DTX3L	6.95158	1.4184	3.61215e-12	1.85169e-09
Sus_scrofa___IFIT5	6.87362	1.65607	6.25934e-12	3.14874e-09
Sus_scrofa___TRANK1	6.75279	1.0991	1.4503e-11	7.16184e-09
Sus_scrofa___ENSSSCG00000017754	6.69953	1.14498	2.09089e-11	1.01391e-08
Sus_scrofa___AKAP7	6.63511	1.00167	3.2425e-11	1.53097e-08
Sus_scrofa___FAM167B	6.61947	1.50519	3.60484e-11	1.68725e-08
Sus_scrofa___PLSCR1	6.52539	1.00919	6.7827e-11	3.09394e-08
Sus_scrofa___ENSSSCG00000014997	6.51843	0.908315	7.10449e-11	3.18672e-08
Sus_scrofa___PSMB8	6.49751	1.17487	8.16612e-11	3.60287e-08
Sus_scrofa___ENSSSCG00000014600	6.3135	1.13487	2.72796e-10	1.15618e-07
Sus_scrofa___ENSSSCG00000033262	6.2825	0.801164	3.33166e-10	1.40102e-07
Sus_scrofa___USP18	6.24778	1.11709	4.16332e-10	1.73717e-07
Sus_scrofa___CMPK2	6.07225	1.12775	1.26133e-09	4.91975e-07
Sus_scrofa___ENSSSCG00000043835	6.00395	1.01368	1.92569e-09	7.40374e-07
Sus_scrofa___STC1	5.84701	0.83508	5.00497e-09	1.84519e-06
Sus_scrofa___PSMB9	5.67654	1.40776	1.3745e-08	4.86735e-06
Sus_scrofa___IRF7	5.66235	2.98016	1.49318e-08	5.25306e-06
Sus_scrofa___ETV7	5.64191	2.0897	1.68176e-08	5.80271e-06
Sus_scrofa___RHBDD1	5.53022	1.13576	3.19839e-08	1.06269e-05
Sus_scrofa___ENSSSCG00000009240	5.51522	1.78707	3.48351e-08	1.14331e-05
Sus_scrofa___TMEM204	5.44372	1.12881	5.21783e-08	1.66318e-05
Sus_scrofa___ENSSSCG00000029830	5.39943	1.31853	6.6852e-08	2.09208e-05
Sus_scrofa___ENSSSCG00000001398	5.38066	1.07724	7.42121e-08	2.30898e-05
Sus_scrofa___TINAGL1	5.32003	1.12582	1.03753e-07	3.17307e-05
Sus_scrofa___ENSSSCG00000044574	5.23674	1.2861	1.63442e-07	4.67948e-05
Sus_scrofa___SP110	5.19121	0.879524	2.08927e-07	5.8878e-05
Sus_scrofa___ENDOV	5.18138	1.10402	2.20249e-07	6.17454e-05
Sus_scrofa___MORC3	5.13815	1.0696	2.77456e-07	7.61957e-05
Sus_scrofa___ST3GAL6	4.95825	0.894586	7.11297e-07	0.000188602
Sus_scrofa___C2CD3	4.92778	1.00534	8.31679e-07	0.00021731
Sus_scrofa___DENND5B	4.83413	0.790556	1.33732e-06	0.00033954

## Sheet: EC_PCMV_PRV_sus
Gene	scores	log2FC	pvals	FDR
pCMV_____gp17	10.103	11.9111	5.35814e-24	2.88407e-19
pCMV_____gp61	9.83072	12.307	8.30254e-23	2.23446e-18
pCMV_____gp03	9.5524	11.1777	1.2673e-21	2.27379e-17
pCMV_____gp32	9.28576	12.7687	1.6055e-20	2.16044e-16
pCMV_____gp25	9.01265	13.4276	2.01129e-19	1.59003e-15
pCMV_____gp26	9.01142	12.5695	2.03408e-19	1.59003e-15
pCMV_____gp06	9.00962	11.4033	2.06781e-19	1.59003e-15
pCMV_____gp45	8.73801	13.122	2.37259e-18	1.59633e-14
pCMV_____gp50	8.4685	30.5801	2.48567e-17	1.20393e-13
pCMV_____gp35	8.46583	12.0327	2.54332e-17	1.20393e-13
pCMV_____gp70	8.46112	10.785	2.64816e-17	1.20393e-13
pCMV_____gp04	8.45955	10.6374	2.68404e-17	1.20393e-13
pCMV_____gp14	8.19326	12.3169	2.54255e-16	1.00784e-12
pCMV_____gp46	8.18958	11.5467	2.62136e-16	1.00784e-12
pCMV_____gp23	7.92075	13.4657	2.36091e-15	8.47188e-12
pCMV_____gp62	7.64897	30.1131	2.02595e-14	5.58423e-11
pCMV_____gp33	7.64824	14.0424	2.03755e-14	5.58423e-11
pCMV_____gp60	7.64784	13.4986	2.04391e-14	5.58423e-11
pCMV_____gp39	7.6477	13.7602	2.04603e-14	5.58423e-11
pCMV_____gp27	7.6459	11.823	2.07492e-14	5.58423e-11
pCMV_____gp18	7.37469	13.2927	1.64727e-13	4.03329e-10
pCMV_____gp34	7.37459	13.0764	1.64851e-13	4.03329e-10
Sus_scrofa___RAD51B	7.33932	2.21425	2.14674e-13	5.02393e-10
pCMV_____gp24	7.10108	13.0064	1.23786e-12	2.50344e-09
pCMV_____gp79	7.10088	13.0531	1.23966e-12	2.50344e-09
pCMV_____gp68	7.09908	11.6656	1.25594e-12	2.50344e-09
pCMV_____gp07	7.09861	11.3149	1.2602e-12	2.50344e-09
pCMV_____gp73	7.09407	11.0629	1.30228e-12	2.50344e-09
pCMV_____gp43	6.82944	30.1588	8.52479e-12	1.31069e-08
pCMV_____gp47	6.8284	13.3724	8.58652e-12	1.31069e-08
pCMV_____gp65	6.82804	13.2741	8.60853e-12	1.31069e-08
pCMV_____gp67	6.8272	12.6006	8.65876e-12	1.31069e-08
pCMV_____gp09	6.82543	11.5103	8.7662e-12	1.31069e-08
pCMV_____gp37	6.55539	13.3339	5.54958e-11	7.43719e-08
pCMV_____gp52	6.55533	13.4023	5.55207e-11	7.43719e-08
pCMV_____gp59	6.55526	13.6149	5.55455e-11	7.43719e-08
pCMV_____gp48	6.55419	12.5889	5.59447e-11	7.43719e-08
pCMV_____gp75	6.55232	11.1176	5.66501e-11	7.43719e-08
pCMV_____gp49	6.28195	14.3924	3.34358e-10	4.01141e-07
pCMV_____gp56	6.28155	13.2013	3.35221e-10	4.01141e-07
pCMV_____gp66	6.28148	12.4262	3.35365e-10	4.01141e-07
pCMV_____gp21	6.00991	28.7832	1.85632e-09	1.98517e-06
pCMV_____gp22	6.0091	13.8225	1.86551e-09	1.98517e-06
pCMV_____gp41	6.00777	12.8597	1.88095e-09	1.98517e-06
pCMV_____gp51	5.73673	29.1045	9.65231e-09	9.62121e-06
pCMV_____gp57	5.73673	29.8074	9.65231e-09	9.62121e-06
pCMV_____gp78	5.73259	11.3339	9.89104e-09	9.67991e-06
pCMV_____gp31	5.46108	11.3904	4.73249e-08	4.39191e-05
pCMV_____gp71	5.45781	10.1092	4.82053e-08	4.39779e-05
Sus_scrofa___WDR7	5.26244	2.02111	1.42155e-07	0.000119557
pCMV_____gp29	5.19037	28.9434	2.09873e-07	0.000158226
pCMV_____gp40	5.19037	29.3474	2.09873e-07	0.000158226
pCMV_____gp36	5.19037	28.4861	2.09873e-07	0.000158226
pCMV_____gp44	5.19037	28.3047	2.09873e-07	0.000158226
pCMV_____gp02	5.1888	11.8374	2.1165e-07	0.000158226
Sus_scrofa___ARHGAP32	4.97948	2.34298	6.37558e-07	0.000439964
Sus_scrofa___NEK1	4.9741	2.20193	6.55509e-07	0.000446625
Sus_scrofa___ENSSSCG00000033654	4.96665	3.52138	6.81178e-07	0.000458313
Sus_scrofa___TRIP11	4.94365	2.46113	7.66753e-07	0.000509522
pCMV_____gp16	4.9172	28.243	8.77929e-07	0.000557597
pCMV_____gp69	4.91613	12.5854	8.82733e-07	0.000557597
pCMV_____gp05	4.91599	12.4814	8.83335e-07	0.000557597
pCMV_____gp38	4.91459	11.0654	8.89682e-07	0.000557597
pCMV_____gp42	4.91432	11.7842	8.90896e-07	0.000557597
Sus_scrofa___CEP128	4.89215	2.31621	9.97411e-07	0.000617088
Sus_scrofa___CENPP	4.77486	2.54785	1.7983e-06	0.00105212
Sus_scrofa___SYCP2	4.7398	2.37441	2.13932e-06	0.00121552
Sus_scrofa___TXNDC11	4.73923	2.39975	2.14533e-06	0.00121552
Sus_scrofa___FAM168A	4.68713	1.63676	2.77061e-06	0.00152174
Sus_scrofa___ENSSSCG00000022032	4.65991	2.24884	3.16341e-06	0.00168588
pCMV_____gp20	4.64402	28.3321	3.41698e-06	0.00179412
pCMV_____gp80	4.64278	12.5544	3.43749e-06	0.00179412
Sus_scrofa___OXSR1	4.63326	2.33855	3.59944e-06	0.00184518
Sus_scrofa___ZNF451	4.55462	2.54752	5.2481e-06	0.0026156
Sus_scrofa___LRBA	4.51197	1.54092	6.4228e-06	0.00311454
Sus_scrofa___PREPL	4.4744	3.75445	7.66259e-06	0.00368256
Sus_scrofa___LRRC28	4.46598	1.43633	7.97012e-06	0.00379646
Sus_scrofa___PSMD1	4.43696	1.41607	9.12365e-06	0.00423353
Sus_scrofa___KDM4C	4.40674	1.53247	1.04938e-05	0.00482767
Sus_scrofa___PCCA	4.40343	1.86221	1.0655e-05	0.00486032
Sus_scrofa___DIAPH3	4.39001	3.09042	1.13346e-05	0.00512685
Sus_scrofa___SMYD3	4.37835	1.14845	1.19579e-05	0.00531938
pCMV_____gp76	4.37084	28.5218	1.23769e-05	0.00532301
pCMV_____gp58	4.37084	28.3958	1.23769e-05	0.00532301
pCMV_____gp55	4.36944	11.7452	1.24567e-05	0.00532301
pCMV_____gp19	4.36937	11.8135	1.24605e-05	0.00532301
Sus_scrofa___USO1	4.34232	1.9729	1.40986e-05	0.00592867
Sus_scrofa___SFMBT1	4.2772	2.58113	1.8926e-05	0.00783624
Sus_scrofa___CLYBL	4.25379	3.02753	2.10184e-05	0.00857074
Sus_scrofa___VRK1	4.23165	3.45769	2.31987e-05	0.00918155
Sus_scrofa___OGDH	4.20566	2.15676	2.60316e-05	0.0101534
Sus_scrofa___TRRAP	4.20099	1.44659	2.65751e-05	0.0102909
Sus_scrofa___CCDC14	4.17097	1.61846	3.0331e-05	0.0114168
Sus_scrofa___CLEC16A	4.14114	2.1369	3.45578e-05	0.012737
Sus_scrofa___CDK5RAP2	4.11272	3.13863	3.91017e-05	0.0141254
pCMV_____gp12	4.09766	27.4245	4.17343e-05	0.0147981
pCMV_____gp64	4.09766	27.9797	4.17343e-05	0.0147981
pCMV_____gp30	4.09519	11.1547	4.2182e-05	0.0148398
pCMV_____gp28	4.09342	9.81312	4.25054e-05	0.0148565
Sus_scrofa___GIGYF2	4.08688	1.63053	4.37221e-05	0.0151831

## Sheet: Meso_EC
Gene	scores	log2FC	pvals	FDR
Sus_scrofa___PRKG1	22.92	4.21042	2.93535e-116	1.57998e-111
Sus_scrofa___DLC1	19.5701	2.30431	2.7834e-85	7.49097e-81
Sus_scrofa___CALD1	18.9641	2.19783	3.37686e-80	6.05877e-76
Sus_scrofa___EBF2	18.7183	5.03017	3.50881e-78	4.72163e-74
Sus_scrofa___GUCY1A2	17.0973	4.48715	1.55451e-65	1.67346e-61
Sus_scrofa___ENSSSCG00000032383	16.9136	6.25185	3.5749e-64	3.20705e-60
Sus_scrofa___SOX5	16.6205	2.1475	4.95456e-62	3.80977e-58
Sus_scrofa___PDGFRB	16.5403	6.24202	1.87994e-61	1.26487e-57
Sus_scrofa___EPS8	16.1532	2.37966	1.07828e-58	6.44883e-55
Sus_scrofa___CACNB2	16.1364	3.11591	1.41482e-58	7.61539e-55
Sus_scrofa___RORA	15.6791	2.15391	2.10258e-55	1.02885e-51
Sus_scrofa___ARHGAP10	15.2348	2.07379	2.07733e-52	9.31787e-49
Sus_scrofa___ADAMTS12	14.8393	3.92206	8.1662e-50	3.38119e-46
Sus_scrofa___ZFPM2	14.5227	1.7596	8.70174e-48	3.34557e-44
Sus_scrofa___DAAM2	14.3512	6.23508	1.04693e-46	3.7568e-43
Sus_scrofa___PDE3A	13.852	1.98768	1.23731e-43	4.16247e-40
Sus_scrofa___PDE1C	13.4519	3.87822	2.99935e-41	9.49666e-38
Sus_scrofa___ENSSSCG00000027725	13.3548	4.05891	1.11087e-40	3.32188e-37
Sus_scrofa___LHFPL6	13.2851	2.01265	2.82428e-40	8.00103e-37
Sus_scrofa___ZEB2	13.0905	2.78742	3.73191e-39	1.00437e-35
Sus_scrofa___PLCL1	13.0764	2.3405	4.4912e-39	1.15116e-35
Sus_scrofa___ARHGAP24	13.0276	2.45787	8.52493e-39	2.08574e-35
Sus_scrofa___GRM7	13.0174	4.69063	9.74879e-39	2.28147e-35
Sus_scrofa___RGS5	13.0021	4.90686	1.19074e-38	2.67054e-35
Sus_scrofa___CYTH3	12.7834	1.85488	2.03094e-37	4.3727e-34
Sus_scrofa___CDK14	12.7259	1.74084	4.24555e-37	8.78928e-34
Sus_scrofa___P3H2	12.7099	3.00618	5.21166e-37	1.03897e-33
Sus_scrofa___ENSSSCG00000009338	12.4897	2.08262	8.4981e-36	1.63364e-32
Sus_scrofa___PARD3	12.307	1.39563	8.30237e-35	1.54098e-31
Sus_scrofa___COL5A3	12.2159	4.97501	2.55724e-34	4.5882e-31
Sus_scrofa___PDE1A	12.1582	3.53509	5.18926e-34	9.01023e-31
Sus_scrofa___RBPMS	11.5397	1.18778	8.31717e-31	1.35661e-27
Sus_scrofa___PTPN13	11.3694	3.75643	5.93996e-30	9.40365e-27
Sus_scrofa___GUCY1A1	11.3136	3.8876	1.12392e-29	1.72846e-26
Sus_scrofa___SEMA5A	11.2107	3.80735	3.61179e-29	5.40023e-26
Sus_scrofa___KIRREL1	11.1889	2.09679	4.62028e-29	6.72138e-26
Sus_scrofa___ARHGAP6	11.0305	3.22051	2.72431e-28	3.85891e-25
Sus_scrofa___GUCY1B1	10.9597	4.36126	5.97294e-28	8.24357e-25
Sus_scrofa___CPM	10.6012	2.40434	2.94303e-26	3.86369e-23
Sus_scrofa___BICC1	10.5519	2.97277	4.97847e-26	6.38026e-23
Sus_scrofa___ITIH5	10.4807	3.09612	1.05974e-25	1.32655e-22
Sus_scrofa___EBF1	10.4331	0.915011	1.75061e-25	2.14156e-22
Sus_scrofa___GJC1	10.4263	1.55902	1.88016e-25	2.24892e-22
Sus_scrofa___MYO1B	10.1399	1.49855	3.67422e-24	4.29932e-21
Sus_scrofa___GPC6	10.1225	3.09559	4.39089e-24	5.0286e-21
Sus_scrofa___PDE10A	10.0939	1.24229	5.87774e-24	6.45664e-21
Sus_scrofa___GRK5	10.041	1.06013	1.00649e-23	1.0835e-20
Sus_scrofa___CTDSPL	9.94013	1.91066	2.78476e-23	2.93907e-20
Sus_scrofa___ARHGAP42	9.92088	3.0575	3.37779e-23	3.4964e-20
Sus_scrofa___AGAP1	9.57043	0.936253	1.06467e-21	1.06124e-18
Sus_scrofa___EDNRB	9.40609	2.82614	5.14956e-21	5.03964e-18
Sus_scrofa___PBX1	9.38025	1.00868	6.5816e-21	6.3261e-18
Sus_scrofa___EGFLAM	9.34894	1.2468	8.85287e-21	8.3599e-18
Sus_scrofa___SSBP2	9.31101	1.36884	1.26616e-20	1.17504e-17
Sus_scrofa___ANTXR1	9.23252	3.9767	2.64343e-20	2.41161e-17
Sus_scrofa___FARP1	9.15532	0.932362	5.41966e-20	4.86198e-17
Sus_scrofa___SYNPO2	9.06595	4.35661	1.23518e-19	1.07234e-16
Sus_scrofa___KCNJ8	9.04723	4.41349	1.46637e-19	1.25284e-16
Sus_scrofa___TPM1	8.92655	1.76269	4.39512e-19	3.69643e-16
Sus_scrofa___DIP2C	8.91714	1.00253	4.78474e-19	3.9622e-16
Sus_scrofa___SULF1	8.90419	1.51277	5.37764e-19	4.38571e-16
Sus_scrofa___ENSSSCG00000014822	8.81528	2.21272	1.1939e-18	9.45038e-16
Sus_scrofa___COL5A2	8.68152	1.50671	3.90517e-18	3.04637e-15
Sus_scrofa___CACNA2D1	8.67726	1.40505	4.05427e-18	3.1175e-15
Sus_scrofa___KCNAB1	8.67493	2.65972	4.13791e-18	3.137e-15
Sus_scrofa___TNS1	8.66406	0.809525	4.55236e-18	3.40327e-15
Sus_scrofa___SEPTIN7	8.65042	1.02836	5.13102e-18	3.78332e-15
Sus_scrofa___STK39	8.59898	2.56432	8.04272e-18	5.8501e-15
Sus_scrofa___ZFHX3	8.39943	1.04412	4.48634e-17	3.17739e-14
Sus_scrofa___ENSSSCG00000016119	8.36076	1.42533	6.23163e-17	4.35615e-14
Sus_scrofa___RASGEF1B	8.22135	2.77527	2.01223e-16	1.38859e-13
Sus_scrofa___SEPTIN11	8.20346	1.25988	2.33573e-16	1.59143e-13
Sus_scrofa___RCAN2	8.01797	2.7877	1.07505e-15	7.05676e-13
Sus_scrofa___PGM5	7.99118	1.50755	1.33654e-15	8.66753e-13
Sus_scrofa___PAG1	7.97419	2.23984	1.53387e-15	9.82882e-13
Sus_scrofa___TRPC6	7.84936	5.54239	4.18164e-15	2.58714e-12
Sus_scrofa___SLC8A1	7.78857	0.929703	6.77709e-15	4.14527e-12
Sus_scrofa___ACTA2	7.77852	4.60304	7.33795e-15	4.43789e-12
Sus_scrofa___ANO1	7.73984	4.45458	9.95409e-15	5.95321e-12
Sus_scrofa___DENND2A	7.7322	2.40223	1.05705e-14	6.25238e-12
Sus_scrofa___BCAS3	7.7072	0.83006	1.28608e-14	7.44349e-12
Sus_scrofa___PACSIN2	7.69229	0.974421	1.44525e-14	8.27576e-12
Sus_scrofa___IGFBP7	7.64459	0.78575	2.09605e-14	1.1876e-11
Sus_scrofa___INPP4B	7.64299	1.08194	2.1224e-14	1.19e-11
Sus_scrofa___MEIS2	7.61661	1.59864	2.60421e-14	1.43035e-11
Sus_scrofa___MAP3K20	7.6057	1.00155	2.8337e-14	1.54067e-11
Sus_scrofa___IRAG1	7.55541	5.01199	4.17526e-14	2.24737e-11
Sus_scrofa___COL6A3	7.53817	3.44126	4.76613e-14	2.54002e-11
Sus_scrofa___ENSSSCG00000011121	7.43046	1.50225	1.08224e-13	5.60119e-11
Sus_scrofa___CYP7B1	7.41598	3.99127	1.20733e-13	6.18913e-11
Sus_scrofa___NEURL1B	7.4061	2.21646	1.30071e-13	6.6049e-11
Sus_scrofa___NOTCH2	7.40294	2.94302	1.33206e-13	6.70087e-11
Sus_scrofa___GAB2	7.36073	1.20609	1.82913e-13	9.1162e-11
Sus_scrofa___HIGD1B	7.33678	6.24094	2.18787e-13	1.06094e-10
Sus_scrofa___THSD7A	7.26118	1.87271	3.83718e-13	1.796e-10
Sus_scrofa___LAMC1	7.24642	0.813535	4.27945e-13	1.98574e-10
Sus_scrofa___SPARCL1	7.21569	1.10515	5.36608e-13	2.46867e-10
Sus_scrofa___NOTCH3	7.21344	5.95308	5.4554e-13	2.48849e-10
Sus_scrofa___SNTB1	7.1785	1.72192	7.04795e-13	3.16136e-10
Sus_scrofa___ENSSSCG00000010440	7.16129	1.29072	7.99218e-13	3.55526e-10

## Sheet: NFkB_EC
Gene	scores	log2FC	pvals	FDR
Sus_scrofa___NFKBIA	6.97742	2.4213	3.00649e-12	1.61827e-07
Sus_scrofa___TNFAIP3	6.3736	4.67605	1.8464e-10	4.96921e-06
Sus_scrofa___ICAM1	5.67729	3.19004	1.36846e-08	0.00024553
Sus_scrofa___RELB	5.46126	2.96213	4.72758e-08	0.000636167
Sus_scrofa___VCAM1	5.03841	4.51235	4.69423e-07	0.00505344
Sus_scrofa___ENSSSCG00000000657	4.66312	1.66439	3.11453e-06	0.025563
Sus_scrofa___KLF7	4.59356	1.09996	4.3574e-06	0.0293176
Sus_scrofa___FLI1	-4.64968	-1.03088	3.32443e-06	0.025563

## Sheet: Hypoxia_EC
Gene	scores	log2FC	pvals	FDR
Sus_scrofa___PLXNA2	21.3924	1.23215	1.57408e-101	4.23632e-97
Sus_scrofa___PDGFD	17.8608	1.01236	2.3809e-71	1.83078e-67
Sus_scrofa___ANGPT2	17.5335	2.11688	7.95044e-69	4.75489e-65
Sus_scrofa___SERPINE1	17.1666	2.33505	4.72299e-66	2.1185e-62
Sus_scrofa___ARHGEF28	16.7318	1.33629	7.69175e-63	3.18474e-59
Sus_scrofa___CNKSR3	16.0352	1.16092	7.25102e-58	2.78781e-54
Sus_scrofa___RAI14	15.0107	0.805867	6.2505e-51	1.97905e-47
Sus_scrofa___COL12A1	14.9443	2.27497	1.69556e-50	5.07028e-47
Sus_scrofa___SMURF2	14.5094	0.801526	1.05576e-47	2.58305e-44
Sus_scrofa___THBS1	14.396	2.27699	5.48012e-47	1.17989e-43
Sus_scrofa___FERMT1	14.3472	1.16086	1.10999e-46	2.29793e-43
Sus_scrofa___AKAP12	13.7953	1.38116	2.71954e-43	4.43582e-40
Sus_scrofa___KIT	13.2898	0.81206	2.65308e-40	3.9668e-37
Sus_scrofa___SLC12A2	13.1023	1.17856	3.19249e-39	4.52208e-36
Sus_scrofa___TIMP3	12.5661	0.778902	3.24225e-36	3.87816e-33
Sus_scrofa___MERTK	12.4343	1.45396	1.70184e-35	1.94901e-32
Sus_scrofa___CRIM1	12.2816	0.812488	1.1372e-34	1.27522e-31
Sus_scrofa___ZNHIT6	11.1865	1.28077	4.74673e-29	4.18848e-26
Sus_scrofa___KLHL5	11.1337	0.985686	8.60275e-29	7.46858e-26
Sus_scrofa___RNF149	11.1152	1.04977	1.05834e-28	9.04224e-26
Sus_scrofa___ENSSSCG00000022925	11.0085	1.34595	3.47615e-28	2.83496e-25
Sus_scrofa___EMP1	10.4708	0.899083	1.17696e-25	8.6782e-23
Sus_scrofa___PDLIM5	10.3568	0.762598	3.8983e-25	2.72507e-22
Sus_scrofa___ITGA2	10.2325	1.70923	1.41811e-24	9.78604e-22
Sus_scrofa___SYN3	10.0694	0.966976	7.54257e-24	5.07483e-21
Sus_scrofa___CBLB	9.9581	0.899377	2.32461e-23	1.52591e-20
Sus_scrofa___SORBS2	9.82842	0.796726	8.49395e-23	5.4428e-20
Sus_scrofa___IGF2BP2	9.82495	0.905511	8.79199e-23	5.5675e-20
Sus_scrofa___ANKRD1	9.59306	1.62529	8.55132e-22	4.94928e-19
Sus_scrofa___HIF1A	9.58424	0.871578	9.31415e-22	5.2773e-19
Sus_scrofa___PID1	9.56739	1.31335	1.09637e-21	6.08384e-19
Sus_scrofa___FAM13A	9.46978	1.21332	2.80427e-21	1.46546e-18
Sus_scrofa___PARP8	9.438	0.850497	3.79954e-21	1.96648e-18
Sus_scrofa___ARNTL2	8.97447	2.20447	2.84721e-19	1.27711e-16
Sus_scrofa___VMP1	8.89578	0.817327	5.80132e-19	2.53872e-16
Sus_scrofa___DDAH1	8.65507	2.00043	4.92625e-18	2.00879e-15
Sus_scrofa___GJC1	8.6001	0.996734	7.96462e-18	3.15223e-15
Sus_scrofa___ADM	8.36609	2.07946	5.95631e-17	2.13736e-14
Sus_scrofa___RGS2	8.22729	2.20675	1.91504e-16	6.68801e-14
Sus_scrofa___OSBPL10	8.22661	0.85345	1.92591e-16	6.68801e-14
Sus_scrofa___C2CD2	8.07706	0.876434	6.63462e-16	2.19089e-13
Sus_scrofa___TSPAN15	7.92723	1.34232	2.24086e-15	7.26607e-13
Sus_scrofa___CCN1	7.88886	2.15039	3.04961e-15	9.65577e-13
Sus_scrofa___ENO1	7.70228	1.53387	1.33661e-14	3.8889e-12
Sus_scrofa___ISG15	7.63562	0.835152	2.24743e-14	6.40053e-12
Sus_scrofa___MARCHF3	7.60718	1.2965	2.80151e-14	7.91206e-12
Sus_scrofa___DDI1	7.49905	1.15412	6.42815e-14	1.77437e-11
Sus_scrofa___XPO6	7.49712	0.905324	6.52328e-14	1.79144e-11
Sus_scrofa___KLHL29	7.46405	1.56171	8.39026e-14	2.29246e-11
Sus_scrofa___XYLT1	7.31135	1.05497	2.64479e-13	6.97835e-11
Sus_scrofa___USP53	7.09055	1.08041	1.33579e-12	3.36611e-10
Sus_scrofa___LOXL2	7.07587	1.36279	1.48517e-12	3.71817e-10
Sus_scrofa___CLCN5	7.02543	1.08203	2.13405e-12	5.1742e-10
Sus_scrofa___TRAF3	7.00783	0.833258	2.42037e-12	5.84209e-10
Sus_scrofa___MCPH1	6.89159	0.963698	5.51741e-12	1.30254e-09
Sus_scrofa___GPR161	6.71096	0.758435	1.9335e-11	4.44755e-09
Sus_scrofa___ITGAV	6.69723	1.07368	2.12404e-11	4.86504e-09
Sus_scrofa___BNIP3	6.68887	1.96459	2.249e-11	5.10778e-09
Sus_scrofa___NDRG1	6.54474	1.14184	5.96007e-11	1.31478e-08
Sus_scrofa___UCK2	6.53046	1.20716	6.55699e-11	1.42313e-08
Sus_scrofa___DOCK7	6.51831	0.886738	7.1102e-11	1.53085e-08
Sus_scrofa___CXCL12	6.48171	1.52658	9.06899e-11	1.92944e-08
Sus_scrofa___HCN1	6.39663	1.3109	1.58844e-10	3.30114e-08
Sus_scrofa___KCTD16	6.27033	1.73646	3.60281e-10	7.34563e-08
Sus_scrofa___MDM2	6.21034	0.765466	5.2869e-10	1.05397e-07
Sus_scrofa___IVNS1ABP	6.1064	1.21391	1.01905e-09	1.94509e-07
Sus_scrofa___AK4	6.01948	1.11279	1.74978e-09	3.26521e-07
Sus_scrofa___PTPRC	5.70042	0.881418	1.1951e-08	2.02287e-06
Sus_scrofa___ACKR3	5.68414	1.5275	1.31476e-08	2.21151e-06
Sus_scrofa___MTHFD1L	5.64306	0.837152	1.67053e-08	2.71655e-06
Sus_scrofa___DDIT4	5.61465	0.847153	1.96959e-08	3.15521e-06
Sus_scrofa___DGKI	5.59105	1.05986	2.25705e-08	3.59432e-06
Sus_scrofa___NEDD4L	5.52232	1.299	3.34545e-08	5.1894e-06
Sus_scrofa___ERO1A	5.48034	1.3984	4.24513e-08	6.47304e-06
Sus_scrofa___AMOTL2	5.21358	1.13541	1.85234e-07	2.65878e-05
Sus_scrofa___SLC20A2	5.20081	0.985639	1.98418e-07	2.81054e-05
Sus_scrofa___RNF19B	5.19508	1.67506	2.04635e-07	2.88343e-05
Sus_scrofa___LARS1	5.14168	0.769116	2.72285e-07	3.71131e-05
Sus_scrofa___RUNX2	4.99673	1.1375	5.83116e-07	7.63669e-05
Sus_scrofa___KLF6	4.99575	0.781139	5.86065e-07	7.65669e-05
Sus_scrofa___ERRFI1	4.83002	1.32965	1.36521e-06	0.000170496
Sus_scrofa___ENSSSCG00000039658	4.79174	1.26692	1.65342e-06	0.000204121
Sus_scrofa___ESM1	4.76592	2.55171	1.87991e-06	0.000229451
Sus_scrofa___DUSP5	4.75174	1.65888	2.01672e-06	0.00024339
Sus_scrofa___PLAGL1	4.6303	0.933011	3.65135e-06	0.000424488
Sus_scrofa___GBE1	4.60504	1.06611	4.12389e-06	0.0004743
Sus_scrofa___SYCP2	4.54953	0.964504	5.37647e-06	0.000606696
Sus_scrofa___SPRY4	4.54513	1.10322	5.49018e-06	0.000618231
Sus_scrofa___SEMA3F	4.52868	0.843596	5.93536e-06	0.000665576
Sus_scrofa___SHROOM2	4.48534	0.850652	7.2797e-06	0.000799667
Sus_scrofa___MALT1	4.38653	0.756114	1.15175e-05	0.00123248
Sus_scrofa___TOPAZ1	4.28922	1.10107	1.79303e-05	0.00185599
Sus_scrofa___MB21D2	4.27948	0.809919	1.87326e-05	0.00193532
Sus_scrofa___IER3	4.24355	2.65893	2.20009e-05	0.00224238
Sus_scrofa___CHST1	4.11487	1.17776	3.87403e-05	0.00375718
Sus_scrofa___PAPSS1	4.06056	0.752391	4.89543e-05	0.00460667
Sus_scrofa___SLC4A7	4.01232	0.844563	6.01252e-05	0.00554161
Sus_scrofa___CHRNB1	3.98633	1.44754	6.7104e-05	0.0060807
Sus_scrofa___EFL1	3.93704	0.834594	8.24924e-05	0.00735139
Sus_scrofa___MAP3K5	3.87047	1.01202	0.000108625	0.00941518

## Sheet: Prolif_EC
Gene	scores	log2FC	pvals	FDR
Sus_scrofa___DIAPH3	21.4483	6.85175	4.73464e-102	2.54847e-97
Sus_scrofa___ATAD2	17.9115	4.49492	9.59493e-72	2.58228e-67
Sus_scrofa___NAV2	15.803	2.47325	2.96713e-56	5.32362e-52
Sus_scrofa___SMC4	15.4514	3.14136	7.38724e-54	9.94064e-50
Sus_scrofa___TPX2	13.4605	5.81279	2.66932e-41	2.87358e-37
Sus_scrofa___EZH2	13.3386	3.70687	1.3803e-40	1.07653e-36
Sus_scrofa___KIF11	13.3375	6.05288	1.40001e-40	1.07653e-36
Sus_scrofa___KCNB2	13.175	2.10073	1.22234e-39	8.22423e-36
Sus_scrofa___KNTC1	13.154	4.97264	1.6134e-39	9.64921e-36
Sus_scrofa___CENPP	13.1254	2.59449	2.35687e-39	1.26861e-35
Sus_scrofa___CIT	12.7524	5.19695	3.02177e-37	1.47864e-33
Sus_scrofa___TOP2A	12.4894	6.92539	8.52494e-36	3.82386e-32
Sus_scrofa___CENPE	12.0313	4.99198	2.43368e-33	1.00766e-29
Sus_scrofa___SYCP2	11.882	2.61047	1.46863e-32	5.64645e-29
Sus_scrofa___CENPF	11.8625	6.33909	1.85447e-32	6.65456e-29
Sus_scrofa___KIF4A	11.4224	4.87069	3.23094e-30	1.08693e-26
Sus_scrofa___ECT2	11.4081	3.39104	3.81053e-30	1.2065e-26
Sus_scrofa___NCAPG	11.1868	5.87456	4.73046e-29	1.41457e-25
Sus_scrofa___SMC2	11.0285	3.03681	2.78356e-28	7.88567e-25
Sus_scrofa___MAST2	10.8704	1.95766	1.59435e-27	4.29089e-24
Sus_scrofa___ENSSSCG00000004782	10.7978	5.32189	3.52563e-27	9.03669e-24
Sus_scrofa___LMNB1	10.5152	3.8478	7.35521e-26	1.79955e-22
Sus_scrofa___ENSSSCG00000035544	10.3823	2.89001	2.98473e-25	6.98505e-22
Sus_scrofa___ENSSSCG00000033654	10.3713	3.54912	3.34846e-25	7.50976e-22
Sus_scrofa___CEP128	10.2636	2.045	1.02811e-24	2.21356e-21
Sus_scrofa___NCAPG2	10.1616	3.7488	2.9432e-24	6.09311e-21
Sus_scrofa___NCAPD3	10.1487	3.0515	3.35782e-24	6.694e-21
Sus_scrofa___DLGAP5	10.1362	6.49855	3.81471e-24	7.33323e-21
Sus_scrofa___KIF15	9.8057	6.19622	1.06405e-22	1.97494e-19
Sus_scrofa___IQGAP3	9.78781	5.91576	1.27014e-22	2.27889e-19
Sus_scrofa___DNA2	9.57718	4.88016	9.97269e-22	1.73158e-18
Sus_scrofa___ANLN	9.5705	5.04542	1.06386e-21	1.78948e-18
Sus_scrofa___RBL1	9.50433	2.6929	2.01345e-21	3.28412e-18
Sus_scrofa___NSD2	9.48947	1.90535	2.32222e-21	3.67635e-18
Sus_scrofa___MMS22L	9.05336	3.51266	1.38637e-19	2.13207e-16
Sus_scrofa___COMMD6	8.98286	1.36948	2.63825e-19	3.94462e-16
Sus_scrofa___ST3GAL3	8.94216	1.63794	3.81624e-19	5.5517e-16
Sus_scrofa___PBX3	8.60799	1.30651	7.43532e-18	1.02619e-14
Sus_scrofa___MTBP	8.54683	4.25167	1.2651e-17	1.70238e-14
Sus_scrofa___ENSSSCG00000026302	8.54309	5.71268	1.30684e-17	1.71565e-14
Sus_scrofa___CSPP1	8.54002	1.6538	1.34196e-17	1.71981e-14
Sus_scrofa___ATAD5	8.43313	4.06484	3.36545e-17	4.21275e-14
Sus_scrofa___PARPBP	8.41716	4.21328	3.85717e-17	4.71854e-14
Sus_scrofa___SPIDR	8.39292	1.42854	4.74232e-17	5.67244e-14
Sus_scrofa___PRIM2	8.35746	2.32837	6.40827e-17	7.49851e-14
Sus_scrofa___POLQ	8.28918	5.16419	1.1403e-16	1.30591e-13
Sus_scrofa___BRIP1	8.2583	2.98835	1.47757e-16	1.65691e-13
Sus_scrofa___RAD51B	8.24596	0.980464	1.63833e-16	1.79969e-13
Sus_scrofa___CEP192	8.23812	2.05936	1.74939e-16	1.88325e-13
Sus_scrofa___NDC80	8.15091	6.12612	3.6121e-16	3.81225e-13
Sus_scrofa___NCAPD2	8.09334	2.77229	5.80489e-16	6.00873e-13
Sus_scrofa___MEIOB	8.06939	1.74479	7.06524e-16	7.17536e-13
Sus_scrofa___HMGB2	8.05765	3.81876	7.77764e-16	7.75258e-13
Sus_scrofa___POLA1	8.00441	2.0732	1.2004e-15	1.17477e-12
Sus_scrofa___ENSSSCG00000009338	7.98927	1.32824	1.35737e-15	1.30468e-12
Sus_scrofa___CMSS1	7.92384	1.17584	2.30284e-15	2.17461e-12
Sus_scrofa___KIF2C	7.91387	5.76312	2.49511e-15	2.31555e-12
Sus_scrofa___PRKCE	7.79341	0.880048	6.52243e-15	5.95044e-12
Sus_scrofa___PRR11	7.78644	5.32173	6.89225e-15	6.18304e-12
Sus_scrofa___TK1	7.76006	3.9027	8.48906e-15	7.49069e-12
Sus_scrofa___ADAM12	7.62906	1.57744	2.36467e-14	2.0381e-11
Sus_scrofa___CKAP5	7.62793	2.18009	2.38547e-14	2.0381e-11
Sus_scrofa___ZGRF1	7.6068	3.32708	2.80966e-14	2.36302e-11
Sus_scrofa___KDSR	7.56124	1.48882	3.99244e-14	3.30611e-11
Sus_scrofa___DTL	7.52819	3.73057	5.14493e-14	4.19592e-11
Sus_scrofa___HMMR	7.43386	5.62413	1.05473e-13	8.47338e-11
Sus_scrofa___RAD51	7.41394	4.47876	1.226e-13	9.70455e-11
Sus_scrofa___KIF23	7.35002	4.611	1.98172e-13	1.53925e-10
Sus_scrofa___VRK1	7.34868	2.91872	2.00177e-13	1.53925e-10
Sus_scrofa___TEAD1	7.34615	0.885678	2.0399e-13	1.54648e-10
Sus_scrofa___CENPI	7.31075	3.64339	2.6566e-13	1.98603e-10
Sus_scrofa___NID2	7.28484	1.06633	3.22043e-13	2.37456e-10
Sus_scrofa___SRSF10	7.27801	1.06852	3.38786e-13	2.46426e-10
Sus_scrofa___TOPBP1	7.17946	1.91821	6.99853e-13	5.02271e-10
Sus_scrofa___CDK5RAP2	7.15027	2.70086	8.66084e-13	6.13393e-10
Sus_scrofa___TICRR	7.14487	5.46181	9.00786e-13	6.29685e-10
Sus_scrofa___ZNF521	7.12397	0.894827	1.04863e-12	7.23636e-10
Sus_scrofa___MPHOSPH9	7.08062	1.51736	1.43511e-12	9.77802e-10
Sus_scrofa___KIF20B	7.07061	3.37195	1.54252e-12	1.02504e-09
Sus_scrofa___SCLT1	7.04599	0.970771	1.84143e-12	1.20874e-09
Sus_scrofa___PAQR8	7.03939	1.62485	1.93089e-12	1.2522e-09
Sus_scrofa___CCDC14	7.03283	1.4606	2.02392e-12	1.2969e-09
Sus_scrofa___NCAPH	7.00954	3.00427	2.39101e-12	1.5141e-09
Sus_scrofa___RRM1	6.95918	1.69743	3.42269e-12	2.1422e-09
Sus_scrofa___REXO5	6.95085	2.46254	3.63092e-12	2.24641e-09
Sus_scrofa___CBFB	6.94566	1.01744	3.76696e-12	2.3041e-09
Sus_scrofa___PKP4	6.93966	0.76778	3.93033e-12	2.37701e-09
Sus_scrofa___MCPH1	6.92809	1.22517	4.26548e-12	2.55104e-09
Sus_scrofa___CDK1	6.89752	2.78949	5.29193e-12	3.13015e-09
Sus_scrofa___MELK	6.89559	5.08533	5.364e-12	3.13829e-09
Sus_scrofa___AAK1	6.88173	1.20545	5.91301e-12	3.4223e-09
Sus_scrofa___KIF18A	6.86052	4.24307	6.86084e-12	3.92864e-09
Sus_scrofa___STIL	6.85008	3.25683	7.3807e-12	4.18183e-09
Sus_scrofa___ENSSSCG00000039107	6.81438	5.02948	9.46739e-12	5.30825e-09
Sus_scrofa___DEPDC1	6.81191	5.74913	9.63095e-12	5.34428e-09
Sus_scrofa___DIP2A	6.77562	1.41668	1.23877e-11	6.80387e-09
Sus_scrofa___POLE	6.76973	5.54684	1.29023e-11	7.01496e-09
Sus_scrofa___PHIP	6.74569	1.21149	1.52303e-11	8.11671e-09
Sus_scrofa___RNASEH2B	6.73387	2.46673	1.65213e-11	8.71841e-09
Sus_scrofa___NUCKS1	6.72186	1.26853	1.79415e-11	9.37593e-09
