# Supplementary material for: Integrated Molecular Profiling of Preclinical and Clinical Cardiac Xenotransplants
Source: Research Square preprint supplement (doi:10.21203/rs.3.rs-8406985/v1), 2026-02-04
Supplement: Supplementary file 27 [file b2ccb3b6f085e8f648db1967.xlsx]

## Sheet: Prolif_vFB
Gene	scores	log2FC	pvals	FDR
Sus_scrofa___DIAPH3	25.9635	7.15962	1.27904e-148	6.88454e-144
Sus_scrofa___ATAD2	21.524	4.31037	9.2798e-103	2.49747e-98
Sus_scrofa___SMC4	18.4182	3.23377	9.39377e-76	1.68543e-71
Sus_scrofa___EZH2	18.2501	4.09509	2.06601e-74	2.78013e-70
Sus_scrofa___CIT	17.0581	5.51738	3.04534e-65	3.27837e-61
Sus_scrofa___MAST2	16.8862	2.66009	5.68679e-64	5.10162e-60
Sus_scrofa___NCAPG	16.7033	6.78158	1.24089e-62	9.54173e-59
Sus_scrofa___ENSSSCG00000035544	16.5967	2.733	7.36488e-62	4.95527e-58
Sus_scrofa___ANLN	16.4651	5.37309	6.53757e-61	3.9099e-57
Sus_scrofa___TPX2	15.9611	5.8018	2.38612e-57	1.28435e-53
Sus_scrofa___KNTC1	15.9477	5.00515	2.95731e-57	1.44709e-53
Sus_scrofa___KIF4A	15.7518	5.76289	6.67695e-56	2.99494e-52
Sus_scrofa___CENPP	15.7274	1.86353	9.8154e-56	4.06403e-52
Sus_scrofa___NCAM1	15.709	2.49138	1.3119e-55	5.04389e-52
Sus_scrofa___DNA2	15.5869	4.75256	8.9301e-55	3.20448e-51
Sus_scrofa___ENSSSCG00000033654	15.4587	3.29796	6.59582e-54	2.21892e-50
Sus_scrofa___SYNE2	15.4175	1.87467	1.24842e-53	3.9528e-50
Sus_scrofa___NCAPG2	15.3229	4.12123	5.37349e-53	1.60685e-49
Sus_scrofa___ADAMTS6	15.2338	2.15378	2.1092e-52	5.97527e-49
Sus_scrofa___SYCP2	15.0938	2.66586	1.77805e-51	4.78526e-48
Sus_scrofa___CEP128	15.0319	2.3462	4.53887e-51	1.16338e-47
Sus_scrofa___ADAM12	14.9877	1.82085	8.83632e-51	2.16193e-47
Sus_scrofa___KIF11	14.972	6.86734	1.11824e-50	2.61698e-47
Sus_scrofa___NSD2	14.9497	3.11606	1.56476e-50	3.50937e-47
Sus_scrofa___TOP2A	14.8042	6.93932	1.37628e-49	2.96318e-46
Sus_scrofa___LMNB1	14.6851	3.1432	8.03065e-49	1.66253e-45
Sus_scrofa___MMS22L	14.3798	3.7765	6.93435e-47	1.3824e-43
Sus_scrofa___RAD51B	14.2767	1.49592	3.05944e-46	5.88134e-43
Sus_scrofa___FANCB	14.128	3.50203	2.55162e-45	4.73598e-42
Sus_scrofa___CNTLN	14.0604	1.43073	6.65282e-45	1.19365e-41
Sus_scrofa___ECT2	14.0449	2.78696	8.28027e-45	1.43772e-41
Sus_scrofa___ZGRF1	13.8914	5.35644	7.13867e-44	1.20077e-40
Sus_scrofa___SMC2	13.8876	3.21509	7.53667e-44	1.2293e-40
Sus_scrofa___CDIN1	13.8659	2.49328	1.01933e-43	1.61373e-40
Sus_scrofa___LCORL	13.8383	2.28683	1.49702e-43	2.30224e-40
Sus_scrofa___ROR1	13.4831	1.30588	1.96693e-41	2.86141e-38
Sus_scrofa___PBX3	13.3961	1.38823	6.37416e-41	9.02883e-38
Sus_scrofa___RBL1	13.362	2.91322	1.00792e-40	1.39108e-37
Sus_scrofa___PARPBP	13.3149	3.6867	1.89576e-40	2.55103e-37
Sus_scrofa___MPHOSPH9	13.2944	1.96817	2.49311e-40	3.27303e-37
Sus_scrofa___POSTN	13.2747	2.19605	3.24618e-40	4.16022e-37
Sus_scrofa___REXO5	13.0855	1.5986	3.98782e-39	4.97434e-36
Sus_scrofa___PRIM2	13.084	2.48055	4.06627e-39	4.97434e-36
Sus_scrofa___CENPI	13.0048	3.69683	1.14914e-38	1.37453e-35
Sus_scrofa___RASAL2	12.9625	1.23922	1.99585e-38	2.33541e-35
Sus_scrofa___SPIDR	12.9485	1.32547	2.39508e-38	2.74293e-35
Sus_scrofa___CENPE	12.919	4.77938	3.51683e-38	3.94368e-35
Sus_scrofa___KIF15	12.7298	6.22196	4.04091e-37	4.4389e-34
Sus_scrofa___NCAPD3	12.6921	2.99806	6.5423e-37	7.04292e-34
Sus_scrofa___POLA1	12.6559	2.13677	1.03841e-36	1.09595e-33
Sus_scrofa___MTBP	12.5987	4.56874	2.1457e-36	2.22105e-33
Sus_scrofa___DTL	12.5792	4.84128	2.74741e-36	2.79023e-33
Sus_scrofa___DLGAP5	12.5268	6.94528	5.32428e-36	5.30713e-33
Sus_scrofa___PKP4	12.5195	1.40647	5.84231e-36	5.7176e-33
Sus_scrofa___MSRB3	12.5085	1.73463	6.71163e-36	6.45108e-33
Sus_scrofa___TOPBP1	12.4543	1.66959	1.32539e-35	1.25159e-32
Sus_scrofa___ENSSSCG00000009338	12.3434	1.61395	5.2867e-35	4.90624e-32
Sus_scrofa___BRIP1	12.2902	3.94799	1.02214e-34	9.32503e-32
Sus_scrofa___BLM	12.0215	3.83278	2.74112e-33	2.45906e-30
Sus_scrofa___RAI14	12.0125	1.32842	3.05556e-33	2.6962e-30
Sus_scrofa___NDC80	12.003	6.79321	3.42753e-33	2.97565e-30
Sus_scrofa___PDLIM5	11.9322	1.48924	8.04492e-33	6.87343e-30
Sus_scrofa___ENSSSCG00000047553	11.9103	2.4081	1.0458e-32	8.79554e-30
Sus_scrofa___AAK1	11.8754	1.45613	1.5887e-32	1.31559e-29
Sus_scrofa___RSRC1	11.7845	1.08853	4.69012e-32	3.76791e-29
Sus_scrofa___USP53	11.6858	1.40526	1.50608e-31	1.19215e-28
Sus_scrofa___KIF20B	11.6309	4.1273	2.87041e-31	2.20718e-28
Sus_scrofa___ERG	11.5961	1.88861	4.31147e-31	3.26858e-28
Sus_scrofa___VRK1	11.591	3.22764	4.57816e-31	3.42256e-28
Sus_scrofa___HELLS	11.5738	3.35174	5.59646e-31	4.12651e-28
Sus_scrofa___VCL	11.5502	1.34562	7.36697e-31	5.35858e-28
Sus_scrofa___TK1	11.5453	4.7598	7.79263e-31	5.59262e-28
Sus_scrofa___UBAP2	11.506	1.22632	1.23074e-30	8.71658e-28
Sus_scrofa___RASSF3	11.5	1.71004	1.31934e-30	9.2227e-28
Sus_scrofa___ENSSSCG00000035751	11.4964	1.70174	1.37549e-30	9.49193e-28
Sus_scrofa___MAGI1	11.4726	1.12916	1.81142e-30	1.2342e-27
Sus_scrofa___CD44	11.4628	2.32606	2.02939e-30	1.36543e-27
Sus_scrofa___IQGAP3	11.453	5.79223	2.27192e-30	1.50974e-27
Sus_scrofa___MIS18BP1	11.3987	1.75098	4.2461e-30	2.7872e-27
Sus_scrofa___ITGAV	11.3726	1.75676	5.72688e-30	3.71392e-27
Sus_scrofa___POLQ	11.3041	4.94871	1.2521e-29	8.02327e-27
Sus_scrofa___RRM1	11.294	1.75957	1.40453e-29	8.89416e-27
Sus_scrofa___FN1	11.2724	1.3378	1.79574e-29	1.12392e-26
Sus_scrofa___ENSSSCG00000015645	11.2103	1.06129	3.62833e-29	2.24481e-26
Sus_scrofa___ROR2	11.1871	1.72466	4.71857e-29	2.88616e-26
Sus_scrofa___MELK	11.1649	5.47209	6.05631e-29	3.66277e-26
Sus_scrofa___SIPA1L1	11.1582	1.22085	6.52858e-29	3.88529e-26
Sus_scrofa___GJC1	11.1577	1.84223	6.56859e-29	3.88529e-26
Sus_scrofa___ENSSSCG00000049691	11.1534	1.15754	6.89327e-29	4.03301e-26
Sus_scrofa___FANCM	11.085	2.40277	1.4829e-28	8.58265e-26
Sus_scrofa___CENPF	11.0572	6.10088	2.0235e-28	1.15869e-25
Sus_scrofa___RACGAP1	11.0455	4.85853	2.30557e-28	1.30631e-25
Sus_scrofa___ENSSSCG00000004830	10.9993	1.09373	3.85125e-28	2.15935e-25
Sus_scrofa___KIF18A	10.9492	4.67019	6.70267e-28	3.71936e-25
Sus_scrofa___RLBP1	10.9412	3.79203	7.32396e-28	4.02265e-25
Sus_scrofa___ENSSSCG00000004782	10.9065	5.21204	1.07336e-27	5.83582e-25
Sus_scrofa___MAP4	10.764	0.994145	5.09255e-27	2.74111e-24
Sus_scrofa___CSPP1	10.7517	1.27531	5.81896e-27	3.1011e-24
Sus_scrofa___SLC20A2	10.7413	1.75879	6.51129e-27	3.43605e-24
Sus_scrofa___RAD51	10.7395	4.13096	6.64041e-27	3.47016e-24

## Sheet: Homeostatic_vFB
Gene	scores	log2FC	pvals	FDR
Sus_scrofa___ABCA6	31.9087	1.53971	2.02239e-223	5.44287e-219
Sus_scrofa___PLPP4	29.381	1.40369	9.59234e-190	8.60528e-186
Sus_scrofa___CCBE1	27.3311	0.897779	1.81052e-164	7.49638e-161
Sus_scrofa___RIPOR3	23.8055	1.39973	2.93263e-125	4.04748e-122
Sus_scrofa___HMCN2	20.1941	1.67544	1.10238e-90	5.6511e-88
Sus_scrofa___ABCA8	19.9331	1.45071	2.10112e-88	9.5843e-86
Sus_scrofa___TTN	18.1888	0.859896	6.33408e-74	1.91538e-71
Sus_scrofa___SPRY1	17.9008	0.981244	1.16216e-71	3.19156e-69
Sus_scrofa___SVEP1	16.7046	0.982348	1.21408e-62	2.40255e-60
Sus_scrofa___ITIH5	15.8555	1.22047	1.28886e-56	2.01669e-54
Sus_scrofa___FMO1	15.2582	1.30522	1.45275e-52	1.95489e-50
Sus_scrofa___HPGD	14.8995	1.578	3.32094e-50	4.15704e-48
Sus_scrofa___GPC3	14.7086	1.06486	5.67394e-49	6.68284e-47
Sus_scrofa___RGMA	13.6245	0.830541	2.8655e-42	2.6456e-40
Sus_scrofa___PLCB4	13.5219	1.24508	1.16182e-41	1.03537e-39
Sus_scrofa___ABCA9	12.7404	1.18043	3.52671e-37	2.62557e-35
Sus_scrofa___MME	11.5925	2.07562	4.4968e-31	2.58043e-29
Sus_scrofa___TMEFF2	11.4631	1.31985	2.0212e-30	1.12042e-28
Sus_scrofa___ROBO2	10.6083	0.999198	2.72529e-26	1.2495e-24
Sus_scrofa___ADAM22	10.1131	1.36218	4.8354e-24	1.97474e-22
Sus_scrofa___SHMT1	9.72463	1.90771	2.36766e-22	8.83782e-21
Sus_scrofa___SNTB1	9.25717	1.0041	2.09928e-20	7.05783e-19
Sus_scrofa___KAZN	8.92308	1.0118	4.53489e-19	1.42662e-17
Sus_scrofa___SLC46A3	8.68518	1.53652	3.78138e-18	1.13581e-16
Sus_scrofa___ART4	8.61485	1.34091	7.00318e-18	2.0689e-16
Sus_scrofa___SLC27A6	8.16601	1.17948	3.18744e-16	8.54845e-15
Sus_scrofa___VEGFC	8.01956	1.11858	1.06122e-15	2.75815e-14
Sus_scrofa___IGFBP5	7.93251	1.14792	2.14757e-15	5.48883e-14
Sus_scrofa___VEGFD	7.87354	1.31483	3.44746e-15	8.7078e-14
Sus_scrofa___SPARCL1	7.81752	0.805038	5.38732e-15	1.34249e-13
Sus_scrofa___TOP3A	7.65511	0.910253	1.93149e-14	4.67677e-13
Sus_scrofa___VGLL3	7.18198	0.888436	6.87096e-13	1.52888e-11
Sus_scrofa___CA10	7.06162	1.40504	1.64577e-12	3.58499e-11
Sus_scrofa___MTUS2	6.22209	1.54423	4.90568e-10	8.96614e-09
Sus_scrofa___SLC35F3	5.80256	1.86673	6.53106e-09	1.10617e-07
Sus_scrofa___C1QTNF7	5.35351	0.817736	8.62646e-08	1.34705e-06
Sus_scrofa___CD36	5.281	0.765003	1.28479e-07	1.98664e-06
Sus_scrofa___TNS3	5.04238	0.961545	4.5977e-07	6.7783e-06
Sus_scrofa___GPC5	4.63512	0.883892	3.56729e-06	4.8574e-05
Sus_scrofa___ALDH1A1	4.56336	1.4419	5.03415e-06	6.77082e-05
Sus_scrofa___GFRA1	4.46582	1.42663	7.97642e-06	0.000105101
Sus_scrofa___EYA2	4.14032	0.78602	3.46819e-05	0.000425236
Sus_scrofa___RYR2	4.02136	0.762239	5.78638e-05	0.000693207
Sus_scrofa___ADM	3.7448	0.973247	0.000180536	0.00205618
Sus_scrofa___ARHGAP20	3.72462	1.10926	0.000195612	0.00222084
Sus_scrofa___ENPP2	3.7067	1.18138	0.000209975	0.00237489
Sus_scrofa___ENPEP	3.66489	1.11503	0.000247443	0.00277823
Sus_scrofa___MYL2	3.60591	0.975276	0.000311062	0.00345079
Sus_scrofa___ENSSSCG00000041213	3.57428	1.3947	0.000351199	0.00387369
Sus_scrofa___CDKL1	3.45333	0.849547	0.000553702	0.00595833
Sus_scrofa___SHCBP1L	3.40587	1.10442	0.000659535	0.00703251
Sus_scrofa___HNMT	3.39524	0.910463	0.000685675	0.00728958
Sus_scrofa___NRXN1	3.03027	0.95564	0.00244339	0.0241052
Sus_scrofa___PARD6B	2.83854	1.13674	0.00453208	0.0429025
Sus_scrofa___NLGN1	-2.7864	-1.98821	0.00532979	0.0498577
Sus_scrofa___ENSSSCG00000004415	-2.78919	-0.776244	0.00528404	0.0494556
Sus_scrofa___RHOU	-2.79031	-0.853646	0.0052658	0.0493105
Sus_scrofa___ENSSSCG00000004963	-2.7981	-1.32357	0.0051404	0.0481865
Sus_scrofa___ENSSSCG00000032023	-2.79835	-1.31908	0.00513648	0.0481582
Sus_scrofa___RASL11B	-2.80075	-1.38272	0.00509834	0.0478423
Sus_scrofa___ACOT13	-2.80219	-1.41795	0.00507566	0.0476688
Sus_scrofa___SYN1	-2.80224	-2.22793	0.00507484	0.0476688
Sus_scrofa___ENSSSCG00000043628	-2.80273	-1.15227	0.00506726	0.0476087
Sus_scrofa___PTGFR	-2.80968	-1.38826	0.00495908	0.0466412
Sus_scrofa___NRG1	-2.8161	-1.09038	0.00486099	0.0457986
Sus_scrofa___FANCL	-2.82005	-1.21626	0.00480162	0.045271
Sus_scrofa___LPIN1	-2.82018	-1.77817	0.0047996	0.0452598
Sus_scrofa___RLBP1	-2.82501	-1.03781	0.00472798	0.0446001
Sus_scrofa___ENSSSCG00000041499	-2.82993	-1.58067	0.00465588	0.0439662
Sus_scrofa___ACADSB	-2.83144	-1.64259	0.00463393	0.043782
Sus_scrofa___CASTOR2	-2.83653	-0.798471	0.00456069	0.0431506
Sus_scrofa___TPST2	-2.83739	-1.30772	0.0045484	0.0430419
Sus_scrofa___IDH3A	-2.83834	-2.59725	0.00453486	0.0429213
Sus_scrofa___DCUN1D2	-2.83952	-1.25383	0.00451816	0.0427783
Sus_scrofa___ADPRH	-2.83953	-1.2154	0.00451806	0.0427783
Sus_scrofa___NUP42	-2.84438	-0.935213	0.00444973	0.0421897
Sus_scrofa___ADGRG2	-2.85003	-2.58206	0.0043715	0.0414772
Sus_scrofa___ENSSSCG00000003741	-2.85237	-0.83674	0.00433939	0.0412016
Sus_scrofa___LEF1	-2.86404	-2.0311	0.00418278	0.0397708
Sus_scrofa___CFL2	-2.86819	-1.78574	0.00412823	0.0393146
Sus_scrofa___EXOSC9	-2.87181	-0.781955	0.00408122	0.0388876
Sus_scrofa___CGRRF1	-2.8746	-0.751263	0.00404537	0.0385664
Sus_scrofa___PKD2L2	-2.8767	-1.46667	0.00401862	0.038325
Sus_scrofa___ENSSSCG00000005424	-2.87776	-2.46309	0.00400516	0.0382237
Sus_scrofa___ELP5	-2.88417	-0.90519	0.00392448	0.0375069
Sus_scrofa___WDR62	-2.88679	-0.85574	0.00389193	0.0372289
Sus_scrofa___TBC1D7	-2.89763	-0.821483	0.00375994	0.0360367
Sus_scrofa___MYO19	-2.90084	-1.94902	0.00372161	0.0357012
Sus_scrofa___AIMP2	-2.907	-1.15748	0.00364911	0.0350557
Sus_scrofa___LONP1	-2.91014	-0.84178	0.00361272	0.0347371
Sus_scrofa___CCDC58	-2.91221	-1.17349	0.00358878	0.0345254
Sus_scrofa___EPB41L1	-2.91486	-1.39779	0.0035585	0.0342525
Sus_scrofa___ENSSSCG00000032422	-2.91569	-1.37712	0.00354907	0.0341678
Sus_scrofa___BGN	-2.91903	-0.936753	0.00351122	0.0338216
Sus_scrofa___FAM161A	-2.92072	-0.781401	0.00349223	0.033665
Sus_scrofa___SEPSECS	-2.92278	-1.01228	0.00346923	0.0334811
Sus_scrofa___EIF1AX	-2.92343	-0.801063	0.00346202	0.0334314
Sus_scrofa___ENSSSCG00000014197	-2.92518	-1.1085	0.00344262	0.033256
Sus_scrofa___ATP5F1A	-2.92901	-0.787471	0.00340039	0.0328835
Sus_scrofa___GGA2	-2.93499	-1.8323	0.00333563	0.0322862

## Sheet: Hypoxia_vFB
Gene	scores	log2FC	pvals	FDR
Sus_scrofa___FAM13A	31.2772	2.56627	9.52551e-215	5.1272e-210
Sus_scrofa___ENO1	25.2835	2.82753	4.85725e-141	1.30723e-136
Sus_scrofa___BNIP3	24.2026	3.30985	2.08766e-129	3.74568e-125
Sus_scrofa___NDRG1	23.8469	3.48234	1.08946e-125	1.17282e-121
Sus_scrofa___GBE1	22.6443	2.37584	1.5894e-113	1.42585e-109
Sus_scrofa___WSB1	22.0741	1.59764	5.60252e-108	4.30802e-104
Sus_scrofa___DDIT4	21.8907	3.10592	3.18492e-106	2.14289e-102
Sus_scrofa___ERO1A	20.856	3.35929	1.34498e-96	8.0439e-93
Sus_scrofa___PLOD2	20.3616	1.32792	3.66528e-92	1.97287e-88
Sus_scrofa___ENSSSCG00000022925	18.7972	2.6428	7.9664e-79	3.89818e-75
Sus_scrofa___KDM2A	18.7289	1.15244	2.88018e-78	1.29191e-74
Sus_scrofa___UGP2	18.212	1.72991	4.14763e-74	1.71731e-70
Sus_scrofa___FGFR2	18.1463	2.38402	1.37424e-73	5.28357e-70
Sus_scrofa___HK1	17.0816	1.86954	2.03351e-65	5.76082e-62
Sus_scrofa___FARP1	17.0341	1.23316	4.59064e-65	1.23548e-61
Sus_scrofa___ENSSSCG00000010172	16.8186	1.99329	1.78245e-63	4.56868e-60
Sus_scrofa___GPI	16.7928	2.37021	2.75362e-63	6.73712e-60
Sus_scrofa___HK2	16.1429	3.17594	1.27416e-58	2.74333e-55
Sus_scrofa___LOXL2	15.831	1.60026	1.90043e-56	3.65331e-53
Sus_scrofa___P4HA1	15.8105	1.37857	2.63236e-56	4.88585e-53
Sus_scrofa___ZNF395	15.7495	2.428	6.91849e-56	1.24132e-52
Sus_scrofa___GLS	14.7929	1.03196	1.62874e-49	2.30706e-46
Sus_scrofa___SYCP2	14.7592	2.31888	2.68316e-49	3.61059e-46
Sus_scrofa___TMEM45A	14.5577	1.83987	5.2194e-48	6.85218e-45
Sus_scrofa___CBLB	14.0949	0.938809	4.08417e-45	4.88521e-42
Sus_scrofa___KDM5B	14.0875	1.37466	4.53587e-45	5.30756e-42
Sus_scrofa___PLOD1	13.9465	1.94171	3.30486e-44	3.48799e-41
Sus_scrofa___CHSY3	13.8595	1.26384	1.11448e-43	1.13185e-40
Sus_scrofa___ERRFI1	13.6876	2.22961	1.20407e-42	1.20019e-39
Sus_scrofa___COL6A3	13.3265	0.848181	1.62335e-40	1.48099e-37
Sus_scrofa___HIF1A	13.2937	1.7064	2.51947e-40	2.22316e-37
Sus_scrofa___KDM3A	13.1242	1.82076	2.39192e-39	2.04361e-36
Sus_scrofa___FCHSD2	12.4985	1.43397	7.60606e-36	5.84862e-33
Sus_scrofa___ZNF292	12.4702	1.26239	1.08614e-35	8.23415e-33
Sus_scrofa___CCSER1	12.4006	1.90389	2.59311e-35	1.88617e-32
Sus_scrofa___ASPH	12.3775	1.18115	3.45799e-35	2.48173e-32
Sus_scrofa___FN1	12.3749	1.27367	3.57217e-35	2.52994e-32
Sus_scrofa___PFKFB3	12.1626	2.13486	4.9146e-34	3.26584e-31
Sus_scrofa___RLF	12.1476	1.10126	5.90406e-34	3.87551e-31
Sus_scrofa___ENSSSCG00000022128	11.7488	1.64516	7.16e-32	4.42982e-29
Sus_scrofa___SULF1	11.7332	1.02247	8.61793e-32	5.27124e-29
Sus_scrofa___FAM162A	11.698	3.44355	1.30566e-31	7.80869e-29
Sus_scrofa___RNF149	11.6604	2.57585	2.03149e-31	1.20161e-28
Sus_scrofa___ENSSSCG00000013366	11.3678	2.69608	6.05134e-30	3.42862e-27
Sus_scrofa___CA12	11.248	2.58085	2.36903e-29	1.30118e-26
Sus_scrofa___PDK1	11.118	2.5427	1.02489e-28	5.57228e-26
Sus_scrofa___ENSSSCG00000009293	11.0151	1.53966	3.23264e-28	1.72277e-25
Sus_scrofa___ELL2	10.9708	2.30685	5.27942e-28	2.73241e-25
Sus_scrofa___MTSS1	10.9052	1.72177	1.08804e-27	5.5776e-25
Sus_scrofa___SND1	10.7389	0.839861	6.68383e-27	3.36228e-24
Sus_scrofa___DARS1	10.5721	1.30254	4.01376e-26	1.94635e-23
Sus_scrofa___MAP2K1	10.473	1.8917	1.14952e-25	5.52445e-23
Sus_scrofa___CEP85L	10.4486	1.07903	1.48766e-25	7.06974e-23
Sus_scrofa___SERPINE1	10.3316	1.4897	5.06891e-25	2.33196e-22
Sus_scrofa___VMP1	10.1348	0.804633	3.86999e-24	1.67989e-21
Sus_scrofa___ACKR3	10.0894	2.24681	6.15606e-24	2.65085e-21
Sus_scrofa___JAK2	10.0009	0.869186	1.50958e-23	6.39802e-21
Sus_scrofa___HIVEP2	9.99071	0.751033	1.67387e-23	7.03889e-21
Sus_scrofa___GLIS3	9.96387	0.804469	2.19345e-23	9.1523e-21
Sus_scrofa___KDM4C	9.94544	1.03281	2.64009e-23	1.07656e-20
Sus_scrofa___SNAPC1	9.90452	2.06194	3.97882e-23	1.5864e-20
Sus_scrofa___MAP4K4	9.73583	0.826227	2.12068e-22	8.15342e-20
Sus_scrofa___AK4	9.69141	1.53071	3.27971e-22	1.2345e-19
Sus_scrofa___IL16	9.64019	1.00085	5.40875e-22	2.0078e-19
Sus_scrofa___MAP3K1	9.56217	1.60796	1.15314e-21	4.19383e-19
Sus_scrofa___GAS7	9.44404	0.859826	3.58688e-21	1.27859e-18
Sus_scrofa___CHMP4B	9.4143	1.29993	4.76262e-21	1.68653e-18
Sus_scrofa___VEGFA	9.34014	2.93656	9.62095e-21	3.3196e-18
Sus_scrofa___NEDD4L	9.28593	3.43972	1.60307e-20	5.49599e-18
Sus_scrofa___KDM4B	9.24816	1.13121	2.28398e-20	7.68359e-18
Sus_scrofa___TNC	9.15525	1.31109	5.42308e-20	1.7799e-17
Sus_scrofa___TRIOBP	9.04335	1.4331	1.51944e-19	4.86817e-17
Sus_scrofa___ENSSSCG00000014600	8.99881	1.50406	2.28181e-19	7.2675e-17
Sus_scrofa___GJC1	8.87375	1.79581	7.07257e-19	2.2133e-16
Sus_scrofa___NEBL	8.76962	2.30138	1.79276e-18	5.51412e-16
Sus_scrofa___IFNGR2	8.72803	1.15464	2.59143e-18	7.88057e-16
Sus_scrofa___IGFBP2	8.70981	3.92051	3.0438e-18	9.15282e-16
Sus_scrofa___SFMBT2	8.68906	1.27663	3.65453e-18	1.09283e-15
Sus_scrofa___RANBP6	8.67676	0.948622	4.07193e-18	1.20426e-15
Sus_scrofa___UNC5B	8.67437	2.99157	4.15832e-18	1.22309e-15
Sus_scrofa___DDAH1	8.62928	1.7937	6.17414e-18	1.79638e-15
Sus_scrofa___RTN4	8.48117	0.809832	2.22935e-17	6.21745e-15
Sus_scrofa___SOCS5	8.46631	0.997878	2.53301e-17	7.02793e-15
Sus_scrofa___PHF21A	8.41088	0.755484	4.06961e-17	1.11761e-14
Sus_scrofa___SMOC1	8.39094	1.07621	4.82292e-17	1.3111e-14
Sus_scrofa___FBXO39	8.37523	1.47459	5.51165e-17	1.4908e-14
Sus_scrofa___BCAT1	8.31064	2.42234	9.51903e-17	2.56186e-14
Sus_scrofa___FAM102A	8.22038	1.56501	2.0286e-16	5.35251e-14
Sus_scrofa___OGDH	8.08358	1.69095	6.28917e-16	1.63537e-13
Sus_scrofa___P4HB	8.05048	2.61908	8.24683e-16	2.13411e-13
Sus_scrofa___BHLHE40	8.0468	2.59698	8.49842e-16	2.18869e-13
Sus_scrofa___ABHD18	7.84963	2.00742	4.17278e-15	1.03983e-12
Sus_scrofa___ENSSSCG00000013869	7.82081	3.81871	5.24834e-15	1.28994e-12
Sus_scrofa___OSMR	7.71765	0.888935	1.18498e-14	2.8731e-12
Sus_scrofa___EGLN3	7.66132	3.91196	1.84034e-14	4.42223e-12
Sus_scrofa___CMIP	7.57447	0.765323	3.60603e-14	8.40252e-12
Sus_scrofa___HSPA5	7.54455	2.74699	4.53861e-14	1.03955e-11
Sus_scrofa___PKM	7.49191	2.29324	6.78768e-14	1.52231e-11
Sus_scrofa___GTPBP8	7.46905	1.28546	8.07747e-14	1.7966e-11
Sus_scrofa___PGK1	7.41534	2.25899	1.21317e-13	2.64372e-11

## Sheet: Myo_vFB
Gene	scores	log2FC	pvals	FDR
Sus_scrofa___RAI14	37.4306	2.00547	1.24023e-306	6.67564e-302
Sus_scrofa___ROR1	31.4016	1.54401	1.92147e-216	3.4475e-212
Sus_scrofa___ADAM12	29.9795	2.21433	1.81831e-197	2.44681e-193
Sus_scrofa___FN1	29.7694	2.02602	9.71795e-195	1.04616e-190
Sus_scrofa___CHST11	29.0836	1.6542	5.79223e-186	5.19621e-182
Sus_scrofa___KLHL29	27.3365	1.49241	1.56328e-164	1.20207e-160
Sus_scrofa___VMP1	27.1056	1.24987	8.44711e-162	5.68342e-158
Sus_scrofa___COL8A1	26.7996	1.41361	3.26487e-158	1.95261e-154
Sus_scrofa___ERG	26.0135	2.572	3.48516e-149	1.87592e-145
Sus_scrofa___ENSSSCG00000016629	25.5696	1.32128	3.32569e-144	1.49174e-140
Sus_scrofa___RUNX1	25.279	1.36895	5.4333e-141	2.24964e-137
Sus_scrofa___ATP13A3	25.0868	1.70945	6.92629e-139	2.66296e-135
Sus_scrofa___ITGB1	24.691	1.11327	1.33656e-134	4.49635e-131
Sus_scrofa___LRRFIP1	24.2991	1.19283	2.00329e-130	6.34287e-127
Sus_scrofa___IL1R1	23.9185	1.22155	1.96795e-126	5.88484e-123
Sus_scrofa___VCL	23.6716	1.56633	7.07282e-124	2.00369e-120
Sus_scrofa___POSTN	23.5808	2.2261	6.07105e-123	1.6339e-119
Sus_scrofa___CDH11	23.56	1.09543	9.90563e-123	2.53895e-119
Sus_scrofa___COL12A1	23.4924	1.38573	4.88284e-122	1.19465e-118
Sus_scrofa___USP53	23.3747	1.66288	7.72339e-121	1.80747e-117
Sus_scrofa___ENSSSCG00000004830	23.3162	1.29641	3.03391e-120	6.80429e-117
Sus_scrofa___PKDCC	23.2909	1.38681	5.4876e-120	1.1815e-116
Sus_scrofa___IGFBP7	23.078	1.22925	7.70607e-118	1.59533e-114
Sus_scrofa___SERPINE1	22.9994	2.3107	4.72973e-117	9.42897e-114
Sus_scrofa___SERPINE2	22.7569	1.50137	1.22673e-114	2.27689e-111
Sus_scrofa___SLC4A7	21.9815	1.4734	4.32787e-107	7.27975e-104
Sus_scrofa___PALM2AKAP2	21.7626	1.21124	5.24428e-105	8.30231e-102
Sus_scrofa___RUNX2	21.7208	1.6979	1.30429e-104	2.00585e-101
Sus_scrofa___TLN2	21.7103	1.03204	1.63878e-104	2.45025e-101
Sus_scrofa___MYO1D	21.2795	1.12645	1.75632e-100	2.48778e-97
Sus_scrofa___ENSSSCG00000047553	21.2307	2.69251	4.96657e-100	6.85463e-97
Sus_scrofa___CCL2	21.0101	1.4076	5.30666e-98	6.96674e-95
Sus_scrofa___RABEP1	20.8547	0.920914	1.38102e-96	1.76987e-93
Sus_scrofa___MSRB3	20.7297	1.62146	1.86917e-95	2.33976e-92
Sus_scrofa___SFRP1	20.588	1.22537	3.51539e-94	4.11347e-91
Sus_scrofa___CHSY3	20.2229	0.994823	6.16183e-91	7.05673e-88
Sus_scrofa___ROR2	20.2215	1.82395	6.33467e-91	7.10354e-88
Sus_scrofa___THBS1	20.0436	1.04806	2.29581e-89	2.47148e-86
Sus_scrofa___ACTN1	19.9492	1.00325	1.52219e-88	1.60653e-85
Sus_scrofa___RASA1	19.9051	1.14903	3.67514e-88	3.8042e-85
Sus_scrofa___ENAH	19.8943	1.68621	4.55652e-88	4.62753e-85
Sus_scrofa___RASAL2	19.7506	0.995892	7.9216e-87	7.89607e-84
Sus_scrofa___SOCS5	19.6582	1.17437	4.91639e-86	4.81145e-83
Sus_scrofa___ENSSSCG00000049691	19.3663	1.09066	1.4844e-83	1.40174e-80
Sus_scrofa___TPM1	18.9	1.33573	1.14055e-79	1.05847e-76
Sus_scrofa___LHFPL2	18.7641	0.86004	1.48358e-78	1.33092e-75
Sus_scrofa___SIPA1L1	18.6795	1.03206	7.27394e-78	6.31495e-75
Sus_scrofa___UBE2E2	18.6329	0.788925	1.73872e-77	1.48553e-74
Sus_scrofa___PAPPA	18.5473	1.03408	8.57182e-77	7.20917e-74
Sus_scrofa___ADAMTS6	18.2387	1.79531	2.544e-74	2.07475e-71
Sus_scrofa___STK38L	18.2373	1.86014	2.60925e-74	2.0962e-71
Sus_scrofa___PDLIM7	18.1981	1.3665	5.3467e-74	4.23223e-71
Sus_scrofa___TNC	18.1777	1.54161	7.74921e-74	6.04506e-71
Sus_scrofa___IGF2BP2	17.7699	1.36156	1.20812e-70	9.1589e-68
Sus_scrofa___NCAM1	17.7435	1.98999	1.93419e-70	1.44597e-67
Sus_scrofa___CD44	17.5788	2.16301	3.58094e-69	2.64038e-66
Sus_scrofa___ENSSSCG00000035751	17.4598	1.67333	2.89706e-68	2.0518e-65
Sus_scrofa___SLC20A2	17.3436	1.81863	2.20584e-67	1.54197e-64
Sus_scrofa___AFAP1	17.327	1.14854	2.9448e-67	2.03214e-64
Sus_scrofa___MAGI1	17.1938	0.849461	2.95446e-66	2.013e-63
Sus_scrofa___SMURF1	17.0877	0.877856	1.83357e-65	1.21844e-62
Sus_scrofa___ANKRD28	16.7808	1.00408	3.37438e-63	2.13681e-60
Sus_scrofa___ASCC3	16.7588	0.752797	4.87991e-63	3.05426e-60
Sus_scrofa___MAP4	16.726	0.84013	8.47473e-63	5.18365e-60
Sus_scrofa___LUZP1	16.6079	1.0678	6.10786e-62	3.61277e-59
Sus_scrofa___HGF	16.5304	1.79362	2.21761e-61	1.29745e-58
Sus_scrofa___DLG1	16.4813	0.791282	4.99829e-61	2.86211e-58
Sus_scrofa___CCND3	16.4672	0.755177	6.31587e-61	3.5785e-58
Sus_scrofa___MAP1B	16.2984	1.23647	1.01226e-59	5.55976e-57
Sus_scrofa___ENSSSCG00000000145	16.1907	1.05155	5.86489e-59	3.18872e-56
Sus_scrofa___FILIP1L	16.1832	0.783684	6.62641e-59	3.56673e-56
Sus_scrofa___MEF2A	16.0163	0.752802	9.8284e-58	5.13615e-55
Sus_scrofa___PALLD	15.8894	1.87708	7.50716e-57	3.81208e-54
Sus_scrofa___ZBTB7C	15.7679	1.31645	5.17271e-56	2.57802e-53
Sus_scrofa___ACSL4	15.686	0.76235	1.8843e-55	9.13735e-53
Sus_scrofa___PDE4B	15.5948	1.20287	7.89981e-55	3.72996e-52
Sus_scrofa___OSBPL6	15.5729	0.824929	1.11225e-54	5.20591e-52
Sus_scrofa___PDLIM5	15.5184	1.10414	2.60426e-54	1.20842e-51
Sus_scrofa___IL4R	15.5043	0.998585	3.24341e-54	1.47949e-51
Sus_scrofa___PRRX2	15.4937	1.23826	3.82652e-54	1.73081e-51
Sus_scrofa___GALNT18	15.3928	1.97404	1.83014e-53	8.14125e-51
Sus_scrofa___CORIN	15.2581	2.3002	1.45424e-52	6.36388e-50
Sus_scrofa___ENSSSCG00000009293	15.1552	1.07508	6.99732e-52	3.0131e-49
Sus_scrofa___FMNL3	15.13	1.01345	1.02647e-51	4.38497e-49
Sus_scrofa___NR6A1	15.0717	1.23841	2.48811e-51	1.03818e-48
Sus_scrofa___CACNA2D1	15.0444	0.839681	3.75474e-51	1.55464e-48
Sus_scrofa___ST8SIA1	14.9383	2.30294	1.85514e-50	7.50787e-48
Sus_scrofa___CUX1	14.7278	0.843098	4.27429e-49	1.70421e-46
Sus_scrofa___SLC20A1	14.7219	1.38126	4.66667e-49	1.84697e-46
Sus_scrofa___ZNHIT6	14.6575	0.816985	1.20648e-48	4.7058e-46
Sus_scrofa___SLCO3A1	14.3957	1.18929	5.50501e-47	2.07211e-44
Sus_scrofa___JADE1	14.3778	1.19793	7.13563e-47	2.64884e-44
Sus_scrofa___ARNTL2	14.3304	1.54561	1.41238e-46	5.20705e-44
Sus_scrofa___CHSY1	14.3282	1.03056	1.45896e-46	5.34216e-44
Sus_scrofa___MYO10	14.3238	1.0342	1.5541e-46	5.6521e-44
Sus_scrofa___MYO9B	14.2974	0.905349	2.27156e-46	8.20598e-44
Sus_scrofa___ROBO1	14.2746	0.954882	3.14983e-46	1.13029e-43
Sus_scrofa___PRKAR2A	14.0893	0.865609	4.4211e-45	1.54526e-42
Sus_scrofa___LTBP2	14.0579	1.00661	6.88593e-45	2.37591e-42
Sus_scrofa___YPEL2	13.9875	1.33972	1.85844e-44	6.37148e-42

## Sheet: vFB_ISG
Gene	scores	log2FC	pvals	FDR
Sus_scrofa___OAS2	29.9288	2.89872	8.31757e-197	4.47702e-192
Sus_scrofa___HERC6	27.977	2.85609	3.09869e-172	8.3395e-168
Sus_scrofa___MX1	26.5439	3.10806	3.01891e-155	5.41653e-151
Sus_scrofa___ENSSSCG00000017146	25.8975	2.77748	7.10916e-148	9.56644e-144
Sus_scrofa___EPSTI1	25.7224	3.30188	6.56636e-146	7.06881e-142
Sus_scrofa___HERC5	25.5051	3.38598	1.73188e-143	1.55367e-139
Sus_scrofa___MX2	24.9672	3.58456	1.38968e-137	1.06858e-133
Sus_scrofa___STAT1	24.1197	2.32499	1.55309e-128	1.04496e-124
Sus_scrofa___EIF2AK2	24.0085	2.19158	2.2662e-127	1.35534e-123
Sus_scrofa___ENSSSCG00000034570	22.5901	2.6028	5.42095e-113	2.91788e-109
Sus_scrofa___IFI44L	22.0144	2.19729	2.09735e-107	1.02629e-103
Sus_scrofa___PML	19.0522	2.31815	6.29983e-81	2.82579e-77
Sus_scrofa___ENSSSCG00000014280	18.7818	1.43113	1.06344e-78	4.40313e-75
Sus_scrofa___RSAD2	18.466	3.87109	3.87514e-76	1.48988e-72
Sus_scrofa___USP18	18.1433	2.82572	1.44935e-73	5.20084e-70
Sus_scrofa___IFIH1	17.8309	2.48756	4.07036e-71	1.36932e-67
Sus_scrofa___GHSR	17.8244	1.79423	4.57317e-71	1.44797e-67
Sus_scrofa___PARP14	17.205	3.47072	2.43444e-66	7.27978e-63
Sus_scrofa___ZNFX1	17.1652	2.41681	4.84238e-66	1.37182e-62
Sus_scrofa___ISG12(A)	16.9301	2.51874	2.69752e-64	7.25983e-61
Sus_scrofa___SETX	16.6135	1.54841	5.5628e-62	1.42583e-58
Sus_scrofa___IFIT1	16.5873	3.12196	8.60787e-62	2.10603e-58
Sus_scrofa___IFI44	16.5474	2.26305	1.67115e-61	3.91092e-58
Sus_scrofa___ZC3HAV1	16.4119	2.33064	1.57116e-60	3.52372e-57
Sus_scrofa___ENSSSCG00000001341	16.3933	1.92282	2.13465e-60	4.59599e-57
Sus_scrofa___DDX60	16.2269	3.06918	3.2556e-59	6.73985e-56
Sus_scrofa___ISG15	16.178	3.14726	7.20464e-59	1.43628e-55
Sus_scrofa___ENSSSCG00000001229	15.3083	1.79944	6.72758e-53	1.29328e-49
Sus_scrofa___PARP12	14.0563	2.29651	7.04934e-45	1.30841e-41
Sus_scrofa___FBXO39	13.8644	1.93394	1.04095e-43	1.86767e-40
Sus_scrofa___CAMK2D	13.7942	1.07876	2.76224e-43	4.79614e-40
Sus_scrofa___BST2	13.1421	2.92685	1.88795e-39	3.17565e-36
Sus_scrofa___B2M	13.0848	1.31565	4.02451e-39	6.56435e-36
Sus_scrofa___USP25	12.8757	1.1457	6.16481e-38	9.75962e-35
Sus_scrofa___AKAP7	12.7853	1.59934	1.98187e-37	3.04789e-34
Sus_scrofa___CMPK2	12.5571	2.93296	3.63333e-36	5.43243e-33
Sus_scrofa___TRIM22	12.2735	2.57297	1.25706e-34	1.82872e-31
Sus_scrofa___ATAD1	12.1945	1.25996	3.32362e-34	4.70782e-31
Sus_scrofa___ZBP1	11.9644	2.96855	5.46033e-33	7.53609e-30
Sus_scrofa___TRANK1	11.9569	1.58722	5.97246e-33	8.03685e-30
Sus_scrofa___ENSSSCG00000009240	11.9303	3.0518	8.22592e-33	1.07992e-29
Sus_scrofa___ENSSSCG00000032436	11.814	2.81365	3.30505e-32	4.23566e-29
Sus_scrofa___SERPING1	11.5957	1.6348	4.33091e-31	5.42129e-28
Sus_scrofa___SAMD9	11.1512	2.35545	7.06273e-29	8.63997e-26
Sus_scrofa___ENSSSCG00000010893	10.9981	0.950303	3.90478e-28	4.67064e-25
Sus_scrofa___UBE2L6	10.8724	2.79871	1.56007e-27	1.82549e-24
Sus_scrofa___USP15	10.8134	1.24631	2.97423e-27	3.40619e-24
Sus_scrofa___SLC22A15	10.7581	2.13044	5.42999e-27	6.08905e-24
Sus_scrofa___SORL1	10.7367	1.40331	6.84825e-27	7.52274e-24
Sus_scrofa___SAMHD1	10.6223	1.14753	2.34665e-26	2.52621e-23
Sus_scrofa___PLEKHA4	10.4251	2.47734	1.9045e-25	2.01003e-22
Sus_scrofa___TBC1D32	10.2527	1.72482	1.15107e-24	1.1915e-21
Sus_scrofa___DTX3L	10.2406	2.9997	1.3048e-24	1.32514e-21
Sus_scrofa___TXNIP	9.80702	1.13224	1.05025e-22	1.04687e-19
Sus_scrofa___MORC3	9.79219	1.50544	1.21633e-22	1.19036e-19
Sus_scrofa___PLPP4	9.77307	0.849524	1.46938e-22	1.40994e-19
Sus_scrofa___NLRC5	9.77144	2.93857	1.49308e-22	1.40994e-19
Sus_scrofa___IFIT5	9.6155	2.42826	6.87722e-22	6.27412e-19
Sus_scrofa___PLSCR1	9.6066	1.16672	7.49817e-22	6.72661e-19
Sus_scrofa___ENSSSCG00000014997	9.5799	1.36082	9.71355e-22	8.57118e-19
Sus_scrofa___CD36	9.49832	1.31236	2.13306e-21	1.82245e-18
Sus_scrofa___ENSSSCG00000016263	9.38909	2.15059	6.0523e-21	5.09017e-18
Sus_scrofa___ENSSSCG00000014565	8.94764	1.78469	3.63161e-19	2.87529e-16
Sus_scrofa___H3-5	8.94762	1.0948	3.63244e-19	2.87529e-16
Sus_scrofa___DNAJC13	8.73712	1.02199	2.39121e-18	1.86535e-15
Sus_scrofa___RPLP1	8.73509	1.43605	2.43458e-18	1.87205e-15
Sus_scrofa___PHLPP1	8.72338	0.905248	2.70013e-18	2.047e-15
Sus_scrofa___CD47	8.64065	1.0846	5.58939e-18	4.17853e-15
Sus_scrofa___GPX3	8.53862	1.844	1.35838e-17	9.88058e-15
Sus_scrofa___ENSSSCG00000033089	8.38411	2.7315	5.1111e-17	3.66813e-14
Sus_scrofa___SCARB2	8.37783	1.23846	5.39145e-17	3.81842e-14
Sus_scrofa___C3	8.35614	1.03563	6.48034e-17	4.53001e-14
Sus_scrofa___IRF2	8.21289	1.04567	2.15925e-16	1.4528e-13
Sus_scrofa___PSMF1	8.10318	1.7126	5.35388e-16	3.55775e-13
Sus_scrofa___ENDOV	8.09996	1.7567	5.49792e-16	3.60891e-13
Sus_scrofa___MAGI1	8.05921	0.757194	7.67918e-16	4.92071e-13
Sus_scrofa___ZFP36L2	8.04775	0.824684	8.43332e-16	5.34037e-13
Sus_scrofa___RPS15	8.01016	0.946214	1.14558e-15	7.17003e-13
Sus_scrofa___NAMPT	7.95134	1.49471	1.84498e-15	1.1285e-12
Sus_scrofa___LIPA	7.88528	1.83925	3.13824e-15	1.87688e-12
Sus_scrofa___SMCHD1	7.87158	0.761678	3.5018e-15	2.0713e-12
Sus_scrofa___ENSSSCG00000024974	7.82306	1.42186	5.15565e-15	2.98396e-12
Sus_scrofa___ENSSSCG00000029830	7.79854	1.67491	6.26301e-15	3.58631e-12
Sus_scrofa___CADPS2	7.72511	1.11125	1.11757e-14	6.2015e-12
Sus_scrofa___COX2	7.7069	1.20682	1.28916e-14	7.08065e-12
Sus_scrofa___TENT5A	7.62281	1.82856	2.48214e-14	1.33604e-11
Sus_scrofa___COX3	7.61923	0.996061	2.55188e-14	1.35997e-11
Sus_scrofa___C4A	7.5801	1.97974	3.45279e-14	1.82206e-11
Sus_scrofa___LAMP2	7.55271	1.6851	4.26308e-14	2.22781e-11
Sus_scrofa___THSD4	7.47974	0.927922	7.44714e-14	3.81762e-11
Sus_scrofa___TRIM26	7.36789	1.72139	1.73356e-13	8.72062e-11
Sus_scrofa___ENSSSCG00000033262	7.29675	1.02969	2.94794e-13	1.45574e-10
Sus_scrofa___TGM2	7.27235	1.28632	3.53283e-13	1.72871e-10
Sus_scrofa___CD81	7.2271	1.12521	4.93406e-13	2.39262e-10
Sus_scrofa___ADAR	7.19016	1.42294	6.47147e-13	3.08259e-10
Sus_scrofa___PLAG1	7.09734	1.48603	1.27184e-12	6.00509e-10
Sus_scrofa___ENSSSCG00000014672	7.09134	2.66404	1.32816e-12	6.21646e-10
Sus_scrofa___hCD46	7.0519	0.754806	1.76489e-12	8.16298e-10
Sus_scrofa___SP110	7.03184	1.66835	2.03825e-12	9.29751e-10
Sus_scrofa___RPS8	7.01187	0.947732	2.35152e-12	1.06364e-09

## Sheet: vFB4
Gene	scores	log2FC	pvals	FDR
Sus_scrofa___PDZRN3	18.8583	0.877859	2.5135e-79	1.35291e-74
Sus_scrofa___PRKN	18.7597	0.921272	1.61426e-78	4.34447e-74
Sus_scrofa___TBX20	18.7007	1.12137	4.88172e-78	8.75877e-74
Sus_scrofa___GATA4	18.6683	1.11908	8.96865e-78	1.20687e-73
Sus_scrofa___RNF180	18.4698	1.04894	3.61174e-76	3.88811e-72
Sus_scrofa___CPED1	17.9805	1.08002	2.77204e-72	2.4868e-68
Sus_scrofa___THRB	17.8289	0.777501	4.21772e-71	3.24319e-67
Sus_scrofa___GHR	17.6569	0.796573	9.00709e-70	5.38684e-66
Sus_scrofa___MPDZ	17.4987	0.857428	1.46578e-68	7.88969e-65
Sus_scrofa___FBLN5	17.2884	1.03628	5.75307e-67	2.81513e-63
Sus_scrofa___USP24	16.7583	0.914331	4.92348e-63	1.77596e-59
Sus_scrofa___SESN1	16.7181	0.753513	9.66979e-63	3.19068e-59
Sus_scrofa___TUT4	16.6503	0.779022	3.01127e-62	8.53078e-59
Sus_scrofa___BMP6	16.327	0.809708	6.34185e-60	1.70678e-56
Sus_scrofa___ENOX1	15.7831	0.977726	4.064e-56	9.11454e-53
Sus_scrofa___FAM214A	15.773	0.824262	4.77009e-56	1.02702e-52
Sus_scrofa___DNAJB4	15.7322	1.24535	9.10036e-56	1.81421e-52
Sus_scrofa___NCOA1	15.7067	0.766164	1.3615e-55	2.61729e-52
Sus_scrofa___HECTD4	15.6551	0.854746	3.06732e-55	5.69316e-52
Sus_scrofa___BTRC	15.4998	0.933909	3.48228e-54	5.85741e-51
Sus_scrofa___HERC1	15.3974	0.89807	1.70263e-53	2.66119e-50
Sus_scrofa___SEMA5A	15.3686	0.850546	2.65718e-53	3.97293e-50
Sus_scrofa___RAB2A	15.3629	0.759137	2.90473e-53	4.00897e-50
Sus_scrofa___RABGAP1	15.2426	0.780561	1.84255e-52	2.30644e-49
Sus_scrofa___PTPRD	15.0662	0.77168	2.7032e-51	3.0958e-48
Sus_scrofa___MATN2	14.955	0.871196	1.44413e-50	1.51713e-47
Sus_scrofa___ENSSSCG00000008451	14.4805	0.922286	1.60809e-47	1.37393e-44
Sus_scrofa___FBN2	14.4749	0.96402	1.74553e-47	1.46804e-44
Sus_scrofa___GAB1	14.4565	0.860651	2.27955e-47	1.88768e-44
Sus_scrofa___RICTOR	14.4443	0.849186	2.72436e-47	2.22184e-44
Sus_scrofa___HERC4	14.2779	0.777826	3.00677e-46	2.24781e-43
Sus_scrofa___GAREM1	14.2407	0.927311	5.12382e-46	3.72695e-43
Sus_scrofa___ENSSSCG00000002260	14.2327	0.776327	5.73903e-46	4.11878e-43
Sus_scrofa___STAG2	14.2315	0.80663	5.84064e-46	4.13655e-43
Sus_scrofa___PHLDB2	14.185	0.766847	1.13517e-45	7.93526e-43
Sus_scrofa___ATP2C1	14.1723	0.810478	1.35924e-45	9.26106e-43
Sus_scrofa___SLC25A21	14.0957	0.76286	4.03636e-45	2.68224e-42
Sus_scrofa___PHKB	14.0026	0.839766	1.50247e-44	9.62762e-42
Sus_scrofa___SLMAP	13.8766	0.846739	8.78123e-44	5.43286e-41
Sus_scrofa___CECR2	13.7847	0.843804	3.15282e-43	1.90678e-40
Sus_scrofa___R3HDM1	13.7118	0.765159	8.62841e-43	4.94078e-40
Sus_scrofa___VAV3	13.6668	0.76122	1.60272e-42	8.62681e-40
Sus_scrofa___LAPTM4B	13.5989	1.08176	4.06231e-42	2.16493e-39
Sus_scrofa___PCMTD1	13.55	0.800047	7.92392e-42	4.1409e-39
Sus_scrofa___ENSSSCG00000000530	13.5255	1.12136	1.10557e-41	5.72195e-39
Sus_scrofa___ENSSSCG00000009341	13.485	0.947936	1.91644e-41	9.8242e-39
Sus_scrofa___CRYBG3	13.4015	0.819756	5.922e-41	2.8978e-38
Sus_scrofa___CCSER2	13.1998	0.839406	8.79481e-40	4.04606e-37
Sus_scrofa___CERT1	13.1456	0.833183	1.80396e-39	7.95902e-37
Sus_scrofa___SLAIN2	13.0859	0.786252	3.96336e-39	1.66665e-36
Sus_scrofa___PLCL2	12.7963	0.919489	1.71992e-37	6.10691e-35
Sus_scrofa___ENSSSCG00000021200	12.7932	0.751919	1.78939e-37	6.29516e-35
Sus_scrofa___DENND1B	12.7912	0.842496	1.83535e-37	6.41489e-35
Sus_scrofa___ACSS3	12.7511	1.19417	3.07371e-37	1.06739e-34
Sus_scrofa___TRIP11	12.6984	0.79567	6.03609e-37	2.04339e-34
Sus_scrofa___STXBP6	12.6966	1.14175	6.17683e-37	2.07796e-34
Sus_scrofa___XIAP	12.6494	1.14365	1.1275e-36	3.74622e-34
Sus_scrofa___MPP6	12.5009	0.838473	7.3841e-36	2.28423e-33
Sus_scrofa___CBFA2T2	12.4559	0.759208	1.29926e-35	3.88521e-33
Sus_scrofa___SORL1	12.3402	0.756369	5.50366e-35	1.56741e-32
Sus_scrofa___SNX13	12.1953	0.754256	3.29475e-34	8.91173e-32
Sus_scrofa___CRADD	12.11	0.808292	9.35134e-34	2.40835e-31
Sus_scrofa___SDCCAG8	11.9952	0.875758	3.76462e-33	9.33799e-31
Sus_scrofa___CDON	11.8604	0.904447	1.89996e-32	4.4464e-30
Sus_scrofa___SOX6	11.7318	1.09672	8.75666e-32	1.97212e-29
Sus_scrofa___ATP2A2	11.7166	0.790245	1.04795e-31	2.33086e-29
Sus_scrofa___ATL2	11.5155	0.766165	1.10204e-30	2.25346e-28
Sus_scrofa___CNTN3	11.49	0.836845	1.48069e-30	2.96282e-28
Sus_scrofa___NID2	11.4825	1.09178	1.61517e-30	3.20805e-28
Sus_scrofa___SSPN	11.4608	1.28678	2.07627e-30	4.09366e-28
Sus_scrofa___NDUFS4	11.3568	1.1004	6.86349e-30	1.28723e-27
Sus_scrofa___CASD1	11.3286	0.808297	9.4661e-30	1.75697e-27
Sus_scrofa___UBE2B	11.2964	0.770077	1.36672e-29	2.51075e-27
Sus_scrofa___CREBRF	11.2579	0.978317	2.11697e-29	3.81097e-27
Sus_scrofa___PIAS2	11.1743	0.764571	5.45086e-29	9.34388e-27
Sus_scrofa___ART4	11.0882	0.807069	1.43112e-28	2.30633e-26
Sus_scrofa___RIC1	11.064	0.807081	1.87507e-28	2.96846e-26
Sus_scrofa___ZNF827	10.9899	0.812907	4.27423e-28	6.4625e-26
Sus_scrofa___ENSSSCG00000027557	10.9676	0.875864	5.46776e-28	8.10765e-26
Sus_scrofa___ETFA	10.9585	0.776805	6.04874e-28	8.94449e-26
Sus_scrofa___C2CD5	10.9439	1.07687	7.10915e-28	1.04266e-25
Sus_scrofa___MTARC2	10.7767	1.52866	4.43534e-27	5.96842e-25
Sus_scrofa___LCLAT1	10.7737	1.10894	4.57967e-27	6.14727e-25
Sus_scrofa___CAST	10.7662	0.855996	4.96915e-27	6.65348e-25
Sus_scrofa___PRKACB	10.7398	0.897578	6.61803e-27	8.73093e-25
Sus_scrofa___SECISBP2L	10.7194	0.883602	8.24979e-27	1.08042e-24
Sus_scrofa___FXR1	10.6708	0.943534	1.39409e-26	1.79089e-24
Sus_scrofa___VPS50	10.643	0.938039	1.8795e-26	2.3973e-24
Sus_scrofa___LGR4	10.6387	0.883625	1.96805e-26	2.49253e-24
Sus_scrofa___NAA16	10.6293	0.841471	2.17679e-26	2.73119e-24
Sus_scrofa___PURG	10.5602	0.847015	4.55526e-26	5.53479e-24
Sus_scrofa___SLC38A2	10.5443	0.82912	5.39617e-26	6.49786e-24
Sus_scrofa___RAB30	10.4088	0.870546	2.25992e-25	2.57218e-23
Sus_scrofa___STXBP4	10.3803	0.809515	3.04663e-25	3.4379e-23
Sus_scrofa___LUM	10.3367	0.773906	4.80842e-25	5.31454e-23
Sus_scrofa___ABCB7	10.2884	0.787255	7.94669e-25	8.64118e-23
Sus_scrofa___UBN2	10.1988	0.821264	2.00677e-24	2.10969e-22
Sus_scrofa___CCPG1	10.1921	0.844938	2.15118e-24	2.24834e-22
Sus_scrofa___GALNT7	10.185	1.17948	2.31404e-24	2.40919e-22
Sus_scrofa___XPR1	10.1724	0.852926	2.63216e-24	2.71936e-22

## Sheet: vFB8
Gene	scores	log2FC	pvals	FDR
Sus_scrofa___ENSSSCG00000032383	25.1583	3.62219	1.14722e-139	6.17504e-135
Sus_scrofa___PRKG1	24.8842	1.65908	1.10277e-136	2.96789e-132
Sus_scrofa___GUCY1A2	24.2253	4.13563	1.2039e-129	2.16004e-125
Sus_scrofa___CALD1	23.043	1.41661	1.72877e-117	2.32632e-113
Sus_scrofa___ENSSSCG00000009338	22.0667	2.45002	6.60941e-108	7.11517e-104
Sus_scrofa___ITGA1	21.5181	3.04931	1.05355e-102	9.45136e-99
Sus_scrofa___MAST4	19.9302	1.28578	2.22657e-88	1.71211e-84
Sus_scrofa___PALM2AKAP2	19.3716	1.68124	1.34091e-83	9.02201e-80
Sus_scrofa___GJC1	18.8189	2.79774	5.28247e-79	3.15927e-75
Sus_scrofa___TPM1	18.7848	2.20394	1.00496e-78	5.40932e-75
Sus_scrofa___ACTA2	17.9557	4.20078	4.3336e-72	2.12055e-68
Sus_scrofa___IRAG1	17.6962	4.30538	4.48297e-70	2.01083e-66
Sus_scrofa___IGFBP7	17.4461	1.47659	3.6851e-68	1.5258e-64
Sus_scrofa___RBPMS	17.3054	1.17779	4.28531e-67	1.64758e-63
Sus_scrofa___PLCL1	17.1467	2.84766	6.65235e-66	2.38713e-62
Sus_scrofa___ENSSSCG00000000145	16.5965	1.61742	7.38805e-62	2.48543e-58
Sus_scrofa___EPS8	16.3263	1.19234	6.4139e-60	2.03079e-56
Sus_scrofa___EGFLAM	16.2018	4.6517	4.90024e-59	1.46534e-55
Sus_scrofa___GRK5	16.1872	1.35782	6.21287e-59	1.76007e-55
Sus_scrofa___LPP	15.9795	1.15831	1.77695e-57	4.78231e-54
Sus_scrofa___RAPGEF2	15.9597	1.42125	2.43974e-57	6.25341e-54
Sus_scrofa___VCL	15.7393	1.89438	8.13326e-56	1.98991e-52
Sus_scrofa___ENSSSCG00000027725	15.6579	1.60123	2.93265e-55	6.86317e-52
Sus_scrofa___CACNB2	15.5745	2.39508	1.08561e-54	2.43474e-51
Sus_scrofa___PDE1C	15.4353	2.84138	9.48176e-54	2.04146e-50
Sus_scrofa___PPP1R12A	15.097	0.993558	1.69447e-51	3.37803e-48
Sus_scrofa___KCNAB1	15.023	2.33855	5.18896e-51	9.97504e-48
Sus_scrofa___RGS5	14.8598	4.50906	6.00817e-50	1.11516e-46
Sus_scrofa___SYNPO2	14.8083	3.22763	1.2942e-49	2.32205e-46
Sus_scrofa___STK38L	14.7225	2.26957	4.62313e-49	8.02724e-46
Sus_scrofa___FERMT2	14.6597	1.31572	1.16757e-48	1.96392e-45
Sus_scrofa___GRM7	14.6095	4.54919	2.44464e-48	3.98743e-45
Sus_scrofa___PAWR	14.4498	2.50028	2.51478e-47	3.9812e-44
Sus_scrofa___PDE10A	14.3766	1.39397	7.26151e-47	1.11674e-43
Sus_scrofa___PELI2	14.2044	1.2116	8.60955e-46	1.25248e-42
Sus_scrofa___ENAH	14.053	1.89664	7.38287e-45	1.04576e-41
Sus_scrofa___MYO1B	13.9693	2.20922	2.3996e-44	3.15027e-41
Sus_scrofa___NRP1	13.9563	1.24127	2.88114e-44	3.69239e-41
Sus_scrofa___C3orf70	13.8629	1.95594	1.06345e-43	1.3312e-40
Sus_scrofa___MSRB3	13.8144	1.88456	2.08555e-43	2.55129e-40
Sus_scrofa___PDGFRB	13.7507	1.67637	5.04419e-43	6.03352e-40
Sus_scrofa___TBC1D1	13.7381	2.18693	6.00079e-43	7.02171e-40
Sus_scrofa___MAGI1	13.2588	1.12475	4.01243e-40	4.59517e-37
Sus_scrofa___PDLIM5	13.2392	1.79964	5.21253e-40	5.8452e-37
Sus_scrofa___CLIC4	13.0976	1.20352	3.39758e-39	3.73221e-36
Sus_scrofa___FRMD4A	13.0599	1.04633	5.57839e-39	6.00525e-36
Sus_scrofa___P3H2	12.9567	2.80314	2.1542e-38	2.27357e-35
Sus_scrofa___ITGA8	12.946	2.55663	2.47655e-38	2.56352e-35
Sus_scrofa___RASAL2	12.9043	1.00879	4.25453e-38	4.32084e-35
Sus_scrofa___ATXN1	12.6851	0.92647	7.1518e-37	7.12876e-34
Sus_scrofa___ENSSSCG00000049691	12.6517	1.01409	1.0944e-36	1.07104e-33
Sus_scrofa___PDE3A	12.4682	0.860679	1.11378e-35	1.07054e-32
Sus_scrofa___MYO1E	12.3718	1.37062	3.71213e-35	3.50542e-32
Sus_scrofa___FARP1	12.2597	0.849073	1.49061e-34	1.38334e-31
Sus_scrofa___SEPTIN11	12.1384	1.83949	6.61032e-34	5.93011e-31
Sus_scrofa___SLIT3	12.1187	1.70359	8.41149e-34	7.42224e-31
Sus_scrofa___MAP1B	12.0966	1.38344	1.1007e-33	9.55583e-31
Sus_scrofa___ESYT2	12.0694	1.42828	1.53157e-33	1.30855e-30
Sus_scrofa___MEF2C	11.9643	1.62002	5.46446e-33	4.59578e-30
Sus_scrofa___ANO1	11.9184	3.51205	9.49206e-33	7.8603e-30
Sus_scrofa___SORBS1	11.7609	1.86608	6.20793e-32	5.06285e-29
Sus_scrofa___FRMD3	11.7191	1.40244	1.01742e-31	8.17368e-29
Sus_scrofa___CACNA2D1	11.64	1.09281	2.58079e-31	2.01324e-28
Sus_scrofa___GUCY1B1	11.633	2.0306	2.79968e-31	2.12496e-28
Sus_scrofa___CDH13	11.6329	1.74273	2.80297e-31	2.12496e-28
Sus_scrofa___DAAM2	11.6243	1.21911	3.1004e-31	2.31781e-28
Sus_scrofa___DMD	11.617	1.1357	3.37731e-31	2.49023e-28
Sus_scrofa___ENSSSCG00000036812	11.5951	1.40729	4.36324e-31	3.17373e-28
Sus_scrofa___TNS1	11.4833	0.774121	1.60104e-30	1.13392e-27
Sus_scrofa___ENSSSCG00000039009	11.4656	3.62133	1.96447e-30	1.37324e-27
Sus_scrofa___FLNA	11.4493	1.98709	2.37008e-30	1.63554e-27
Sus_scrofa___MRTFA	11.1088	0.916092	1.1373e-28	7.7489e-26
Sus_scrofa___STAMBPL1	11.0112	4.33423	3.37481e-28	2.27066e-25
Sus_scrofa___MYO1D	10.8667	1.02881	1.66013e-27	1.10319e-24
Sus_scrofa___ITGB1	10.8539	0.896454	1.91137e-27	1.25465e-24
Sus_scrofa___CYTH3	10.7738	0.836928	4.57905e-27	2.96954e-24
Sus_scrofa___IQGAP1	10.575	1.07818	3.89329e-26	2.46541e-23
Sus_scrofa___PHLDB2	10.5435	1.27697	5.44309e-26	3.36758e-23
Sus_scrofa___RYR3	10.4569	2.90715	1.36184e-25	8.23623e-23
Sus_scrofa___NCALD	10.4442	2.8431	1.55785e-25	9.31697e-23
Sus_scrofa___TNIK	10.385	2.25261	2.90279e-25	1.71699e-22
Sus_scrofa___POSTN	10.3708	1.37121	3.36674e-25	1.96976e-22
Sus_scrofa___PGM5	10.2436	3.39398	1.26502e-24	7.32163e-22
Sus_scrofa___ADAMTS12	10.1846	0.882438	2.32398e-24	1.31674e-21
Sus_scrofa___FILIP1	10.1065	2.25003	5.17032e-24	2.89894e-21
Sus_scrofa___TANC1	10.0946	1.14148	5.83898e-24	3.20703e-21
Sus_scrofa___CUX1	9.99268	1.02358	1.64079e-23	8.83169e-21
Sus_scrofa___ACTN1	9.97858	0.967233	1.89147e-23	1.00802e-20
Sus_scrofa___PTPRK	9.87055	0.938013	5.58598e-23	2.91913e-20
Sus_scrofa___FN1	9.80902	1.19138	1.02963e-22	5.32895e-20
Sus_scrofa___ARHGAP26	9.77445	2.12045	1.44941e-22	7.43009e-20
Sus_scrofa___FAM13C	9.70732	1.5192	2.80621e-22	1.41166e-19
Sus_scrofa___SEMA5A	9.68412	1.22501	3.5221e-22	1.75538e-19
Sus_scrofa___THSD7A	9.54802	2.14511	1.32202e-21	6.46901e-19
Sus_scrofa___TRPC6	9.50263	4.00366	2.04644e-21	9.83498e-19
Sus_scrofa___INPP4B	9.49762	2.20014	2.14739e-21	1.02288e-18
Sus_scrofa___NEXN	9.49478	2.69943	2.20685e-21	1.04198e-18
Sus_scrofa___CPM	9.49327	1.38836	2.23906e-21	1.048e-18
Sus_scrofa___MSI2	9.431	0.993042	4.06189e-21	1.88479e-18
Sus_scrofa___LRCH1	9.42253	0.844945	4.40347e-21	2.01714e-18

## Sheet: vFB3
Gene	scores	log2FC	pvals	FDR
Sus_scrofa___C7	19.3999	1.10336	7.72756e-84	4.15944e-79
Sus_scrofa___CGNL1	18.7209	1.08082	3.34679e-78	9.00721e-74
Sus_scrofa___MGP	18.4618	1.16943	4.19355e-76	7.52407e-72
Sus_scrofa___PLA2G4A	16.497	1.04418	3.85454e-61	2.96392e-57
Sus_scrofa___KCNMA1	15.6045	1.7615	6.78665e-55	4.05887e-51
Sus_scrofa___PDE4D	15.27	0.979846	1.21239e-52	6.5258e-49
Sus_scrofa___FOXP2	15.2358	1.1161	2.04734e-52	1.00182e-48
Sus_scrofa___MECOM	14.8185	0.926795	1.11212e-49	4.98842e-46
Sus_scrofa___EPHA3	14.3735	2.35125	7.59496e-47	2.72537e-43
Sus_scrofa___SETBP1	14.07	0.826777	5.80892e-45	1.73706e-41
Sus_scrofa___ACTN1	13.6899	0.978751	1.16664e-42	2.99027e-39
Sus_scrofa___FBLN1	13.2925	0.866317	2.55868e-40	6.26015e-37
Sus_scrofa___CPED1	13.2116	1.28634	7.52427e-40	1.76088e-36
Sus_scrofa___MYO1D	13.119	0.767203	2.56178e-39	5.74543e-36
Sus_scrofa___CYBRD1	13.0956	0.977423	3.48891e-39	7.51176e-36
Sus_scrofa___PDE3B	12.8941	1.35571	4.85673e-38	9.68216e-35
Sus_scrofa___SMOC1	12.8442	1.03209	9.27279e-38	1.78256e-34
Sus_scrofa___DHRS3	12.6982	1.18995	6.05017e-37	1.12295e-33
Sus_scrofa___LIMCH1	12.4903	0.873892	8.43052e-36	1.46381e-32
Sus_scrofa___SLIT3	12.2404	1.54526	1.89096e-34	3.08433e-31
Sus_scrofa___ASAP3	11.8545	0.846493	2.03966e-32	3.04962e-29
Sus_scrofa___ADARB1	11.7505	1.28042	7.0194e-32	1.02115e-28
Sus_scrofa___FBN2	11.4499	1.16874	2.35422e-30	3.33469e-27
Sus_scrofa___LDLRAD4	11.2322	1.06788	2.83253e-29	3.63009e-26
Sus_scrofa___CORO2B	10.894	0.86048	1.23157e-27	1.47312e-24
Sus_scrofa___LRRC17	10.8811	1.47992	1.41907e-27	1.66049e-24
Sus_scrofa___PMEPA1	10.8152	1.05747	2.91803e-27	3.27221e-24
Sus_scrofa___IGF1	10.7723	0.77073	4.65128e-27	5.10938e-24
Sus_scrofa___ZBTB7C	10.3711	1.09869	3.35493e-25	3.47274e-22
Sus_scrofa___NKAIN3	10.0678	1.66516	7.66479e-24	6.87609e-21
Sus_scrofa___SMAD6	9.50643	1.54501	1.97311e-21	1.52718e-18
Sus_scrofa___ABLIM1	9.49071	0.865887	2.29469e-21	1.73963e-18
Sus_scrofa___ZNF704	9.35238	0.77688	8.57e-21	6.31902e-18
Sus_scrofa___MLLT3	9.12651	0.863535	7.07437e-20	4.94526e-17
Sus_scrofa___ELN	9.10427	1.44729	8.68454e-20	5.993e-17
Sus_scrofa___PLCE1	8.79933	0.952576	1.37637e-18	9.03472e-16
Sus_scrofa___SESN3	8.77673	1.41157	1.68297e-18	1.09141e-15
Sus_scrofa___EPHA7	8.76782	1.20102	1.82155e-18	1.16722e-15
Sus_scrofa___ENSSSCG00000037376	8.53396	0.848656	1.41424e-17	8.36515e-15
Sus_scrofa___FAM13C	8.42798	1.15709	3.51695e-17	2.03552e-14
Sus_scrofa___SULF2	8.07162	1.34459	6.93686e-16	3.69686e-13
Sus_scrofa___GRIP1	7.77228	1.59556	7.70847e-15	3.67182e-12
Sus_scrofa___MATN2	7.72097	0.828032	1.15452e-14	5.26635e-12
Sus_scrofa___SMAD7	7.69946	1.15642	1.3664e-14	6.0285e-12
Sus_scrofa___CERT1	7.51818	0.797388	5.55451e-14	2.29982e-11
Sus_scrofa___DOK6	7.47495	1.41345	7.72347e-14	3.17346e-11
Sus_scrofa___PI16	7.41264	1.94772	1.2381e-13	4.90728e-11
Sus_scrofa___NEGR1	7.38858	0.916054	1.48409e-13	5.83083e-11
Sus_scrofa___CYP27A1	6.82345	2.32253	8.88815e-12	3.08654e-09
Sus_scrofa___COLGALT2	6.73822	1.50697	1.60336e-11	5.29464e-09
Sus_scrofa___ANGPT4	6.54996	1.17809	5.75514e-11	1.81156e-08
Sus_scrofa___SORCS2	6.40164	1.74034	1.53715e-10	4.57118e-08
Sus_scrofa___ITGA9	6.21351	0.783889	5.18153e-10	1.47567e-07
Sus_scrofa___LGR4	6.04974	1.05128	1.45083e-09	3.98192e-07
Sus_scrofa___LURAP1L	6.0222	1.36691	1.72064e-09	4.65403e-07
Sus_scrofa___PKNOX2	5.90026	0.806161	3.62925e-09	9.57588e-07
Sus_scrofa___ISM1	5.87161	0.902489	4.31594e-09	1.12227e-06
Sus_scrofa___FIGN	5.80373	1.19434	6.48548e-09	1.64664e-06
Sus_scrofa___GLT8D2	5.74319	0.779322	9.29078e-09	2.31521e-06
Sus_scrofa___TBX18	5.70609	0.765072	1.15603e-08	2.84129e-06
Sus_scrofa___ZNF385D	5.35718	0.802814	8.45295e-08	1.79837e-05
Sus_scrofa___MFAP4	5.29368	0.920973	1.1988e-07	2.50102e-05
Sus_scrofa___AHCYL2	5.11551	1.08705	3.129e-07	5.93034e-05
Sus_scrofa___PLCXD3	5.01357	0.778174	5.34285e-07	9.78177e-05
Sus_scrofa___AFF2	4.87798	1.38316	1.07178e-06	0.000187914
Sus_scrofa___PTCH1	4.82374	0.832408	1.40889e-06	0.00024306
Sus_scrofa___ADAMTSL2	4.79415	1.02815	1.63365e-06	0.000279268
Sus_scrofa___CILP	4.67097	2.0335	2.99782e-06	0.000491954
Sus_scrofa___HEYL	4.65653	1.09707	3.21585e-06	0.000526128
Sus_scrofa___SMAD9	4.60401	0.799001	4.14435e-06	0.00066391
Sus_scrofa___ENSSSCG00000017608	4.5552	0.973882	5.23346e-06	0.000823673
Sus_scrofa___NADSYN1	4.47573	1.38576	7.61496e-06	0.00114174
Sus_scrofa___ASPN	4.45433	0.789268	8.41566e-06	0.00124445
Sus_scrofa___CP	4.43726	1.49665	9.1113e-06	0.00133631
Sus_scrofa___PLEKHG5	4.27408	1.49566	1.91924e-05	0.00262863
Sus_scrofa___MATN4	4.24843	1.66088	2.15269e-05	0.00291133
Sus_scrofa___MEOX1	4.23246	1.84024	2.31148e-05	0.00311044
Sus_scrofa___FBXL13	4.21785	1.08173	2.46645e-05	0.00328612
Sus_scrofa___LRIG3	4.16856	1.01365	3.06533e-05	0.00401446
Sus_scrofa___CPT2	4.1539	1.20923	3.26852e-05	0.00425984
Sus_scrofa___NIBAN1	4.09796	1.08604	4.16803e-05	0.00531631
Sus_scrofa___PRDM6	4.03634	0.967765	5.42917e-05	0.00679606
Sus_scrofa___CPXM2	4.00218	0.999399	6.27618e-05	0.00778391
Sus_scrofa___MN1	3.9634	0.938156	7.38907e-05	0.00912211
Sus_scrofa___UNC13C	3.95069	1.53021	7.79272e-05	0.00953298
Sus_scrofa___CHRDL1	3.89288	0.750139	9.90622e-05	0.0119287
Sus_scrofa___ENSSSCG00000008898	3.86382	1.10027	0.000111628	0.013329
Sus_scrofa___RIMKLB	3.84089	0.957088	0.000122587	0.0145015
Sus_scrofa___RASSF2	3.76744	1.14535	0.00016493	0.0186112
Sus_scrofa___THBS2	3.49391	0.824527	0.000475999	0.0482079
Sus_scrofa___LPL	-3.48556	-1.56454	0.000491103	0.0493463
Sus_scrofa___STK17A	-3.57439	-1.19134	0.000351047	0.0363374
Sus_scrofa___SHMT1	-3.59884	-1.24526	0.00031964	0.0334076
Sus_scrofa___ENSSSCG00000008533	-3.70913	-1.47196	0.000207974	0.0229394
Sus_scrofa___SPOCK3	-3.78313	-0.98679	0.000154866	0.0176981
Sus_scrofa___HK2	-3.81484	-1.59788	0.000136269	0.0158078
Sus_scrofa___SMS	-3.8236	-1.13878	0.00013152	0.0152898
Sus_scrofa___ENSSSCG00000034610	-3.83698	-2.07812	0.000124556	0.0146383
Sus_scrofa___ACSL5	-3.84036	-0.983345	0.000122853	0.0145015
Sus_scrofa___CDKL1	-4.07161	-0.822245	4.6689e-05	0.00589925

## Sheet: vFB6
Gene	scores	log2FC	pvals	FDR
Sus_scrofa___GPC6	25.2244	1.76472	2.16567e-140	1.1657e-135
Sus_scrofa___C7	24.6435	1.63262	4.3213e-134	1.16299e-129
Sus_scrofa___IGF1	24.4371	2.12373	6.89324e-132	1.23678e-127
Sus_scrofa___ADAMTS9	22.3821	2.12691	5.88672e-111	7.92147e-107
Sus_scrofa___GALK2	21.3577	1.58575	3.30586e-101	3.55883e-97
Sus_scrofa___NAV2	20.671	1.42279	6.32289e-95	5.67227e-91
Sus_scrofa___GPM6B	20.1745	1.69173	1.64129e-90	1.26206e-86
Sus_scrofa___NOL11	20.1448	1.2701	2.99187e-90	2.01301e-86
Sus_scrofa___SLC1A3	18.4399	2.03501	6.28997e-76	3.76182e-72
Sus_scrofa___VCAN	18.0401	1.38369	9.44164e-73	5.08206e-69
Sus_scrofa___IGFBP4	17.7332	2.05456	2.32336e-70	1.13688e-66
Sus_scrofa___FGFR2	17.6239	1.92699	1.61383e-69	7.23881e-66
Sus_scrofa___IL4R	17.4327	1.68822	4.65552e-68	1.9276e-64
Sus_scrofa___ETV6	16.9827	1.06026	1.10354e-64	4.24278e-61
Sus_scrofa___ACER3	16.8222	1.03217	1.67848e-63	6.02305e-60
Sus_scrofa___SNED1	16.5962	1.394	7.42985e-62	2.4995e-58
Sus_scrofa___SDK1	16.5439	1.65734	1.77213e-61	5.61097e-58
Sus_scrofa___CHST11	16.2083	1.34667	4.40779e-59	1.31808e-55
Sus_scrofa___PDE7B	16.0126	1.11967	1.04402e-57	2.95765e-54
Sus_scrofa___RUNX1	15.9495	1.27014	2.87096e-57	7.72662e-54
Sus_scrofa___AGAP1	15.4424	0.762396	8.48582e-54	2.17504e-50
Sus_scrofa___ENSSSCG00000031462	15.0563	1.31984	3.1401e-51	7.68268e-48
Sus_scrofa___PLPP1	14.1244	1.03273	2.68699e-45	5.78521e-42
Sus_scrofa___FOXP1	13.9234	0.759689	4.56394e-44	9.09847e-41
Sus_scrofa___NKD1	13.8572	1.24527	1.15153e-43	2.21365e-40
Sus_scrofa___ADAM12	13.2785	1.2519	3.08643e-40	5.03424e-37
Sus_scrofa___PDE4B	13.147	1.44225	1.77082e-39	2.72331e-36
Sus_scrofa___SMAD3	13.0727	0.997842	4.71332e-39	7.0472e-36
Sus_scrofa___LRRFIP1	12.8425	0.936384	9.4721e-38	1.37796e-34
Sus_scrofa___LHFPL2	12.7205	0.936855	4.54929e-37	6.27871e-34
Sus_scrofa___PCSK5	12.5694	1.36848	3.11259e-36	4.18845e-33
Sus_scrofa___AHCYL2	12.552	2.62158	3.87664e-36	5.08936e-33
Sus_scrofa___PRICKLE2	11.9	0.75532	1.18302e-32	1.38429e-29
Sus_scrofa___GFPT2	11.0008	1.39813	3.78605e-28	3.51358e-25
Sus_scrofa___PDE3B	10.7002	1.51367	1.01514e-26	8.67314e-24
Sus_scrofa___RPH3A	10.6504	1.52873	1.73639e-26	1.46036e-23
Sus_scrofa___NRP1	10.449	0.938097	1.48067e-25	1.17203e-22
Sus_scrofa___IL33	10.2504	1.33967	1.17796e-24	8.93027e-22
Sus_scrofa___PI15	10.1955	1.6942	2.07715e-24	1.55285e-21
Sus_scrofa___FGF2	9.82931	0.876907	8.41911e-23	5.96272e-20
Sus_scrofa___ENSSSCG00000036556	9.47763	0.861373	2.60129e-21	1.75022e-18
Sus_scrofa___FAM227B	9.44652	0.868246	3.50266e-21	2.32758e-18
Sus_scrofa___MMD	9.32364	2.89524	1.12412e-20	7.37886e-18
Sus_scrofa___ALDH1A3	9.28393	1.06002	1.63338e-20	1.05925e-17
Sus_scrofa___NET1	9.22945	1.78498	2.72022e-20	1.74308e-17
Sus_scrofa___PAPPA	9.22369	0.852658	2.87048e-20	1.81772e-17
Sus_scrofa___SCMH1	9.20432	0.777209	3.43836e-20	2.15202e-17
Sus_scrofa___ENSSSCG00000012257	9.19739	0.757354	3.66749e-20	2.24326e-17
Sus_scrofa___WFDC1	9.01194	1.46883	2.02442e-19	1.17168e-16
Sus_scrofa___KITLG	8.85661	0.839448	8.24883e-19	4.62502e-16
Sus_scrofa___KCNMA1	8.79641	1.30602	1.41266e-18	7.75899e-16
Sus_scrofa___ENSSSCG00000014997	8.75557	1.1112	2.03084e-18	1.09312e-15
Sus_scrofa___RHOQ	8.63817	1.55215	5.7121e-18	2.93907e-15
Sus_scrofa___ENSSSCG00000009293	8.58654	0.94345	8.96244e-18	4.55106e-15
Sus_scrofa___TGM2	8.5541	1.42294	1.18796e-17	5.97599e-15
Sus_scrofa___ELL	8.48397	0.889349	2.17631e-17	1.05533e-14
Sus_scrofa___CA12	8.33996	1.9872	7.43124e-17	3.44822e-14
Sus_scrofa___KCNQ5	8.0485	0.88546	8.38141e-16	3.6091e-13
Sus_scrofa___SMARCA4	8.01491	0.991676	1.10221e-15	4.67146e-13
Sus_scrofa___MMP2	7.88044	0.921965	3.26241e-15	1.35079e-12
Sus_scrofa___PTPN2	7.83922	0.915936	4.53354e-15	1.84865e-12
Sus_scrofa___ENSSSCG00000027725	7.83582	0.784335	4.65793e-15	1.8851e-12
Sus_scrofa___RDH10	7.79859	1.30722	6.26014e-15	2.51461e-12
Sus_scrofa___PDE10A	7.75939	0.971173	8.53379e-15	3.281e-12
Sus_scrofa___PLEKHA6	7.68703	1.49758	1.50587e-14	5.62882e-12
Sus_scrofa___ANKRD44	7.52738	0.882601	5.17665e-14	1.82117e-11
Sus_scrofa___ENSSSCG00000039658	7.50213	1.39389	6.27886e-14	2.19458e-11
Sus_scrofa___NEK6	7.44814	0.966928	9.46641e-14	3.22493e-11
Sus_scrofa___ZNF385D	7.39742	1.20564	1.38851e-13	4.6421e-11
Sus_scrofa___RANBP6	7.36284	0.874749	1.80032e-13	5.90878e-11
Sus_scrofa___RUNX2	6.95989	0.920903	3.40545e-12	9.64746e-10
Sus_scrofa___PLCXD3	6.94868	1.13461	3.68725e-12	1.02834e-09
Sus_scrofa___GRIP1	6.94056	1.62932	3.9056e-12	1.08362e-09
Sus_scrofa___MAP3K8	6.92282	1.04533	4.42735e-12	1.20968e-09
Sus_scrofa___SBNO2	6.83082	0.890079	8.44277e-12	2.2722e-09
Sus_scrofa___GAN	6.82381	1.10304	8.86575e-12	2.37417e-09
Sus_scrofa___PTX3	6.64979	1.361	2.93502e-11	7.52288e-09
Sus_scrofa___MEIS1	6.58271	0.845319	4.61942e-11	1.17285e-08
Sus_scrofa___SPSB1	6.56329	1.05274	5.26345e-11	1.31772e-08
Sus_scrofa___RGS2	6.53798	2.04385	6.23572e-11	1.55391e-08
Sus_scrofa___CORIN	6.48168	1.6069	9.07096e-11	2.20929e-08
Sus_scrofa___HRH1	6.17854	1.0773	6.46952e-10	1.44493e-07
Sus_scrofa___PPA1	6.12547	1.46696	9.04143e-10	1.98442e-07
Sus_scrofa___GASK1A	6.12498	1.27971	9.06936e-10	1.98442e-07
Sus_scrofa___ACVR1B	6.12037	0.972901	9.33574e-10	2.02623e-07
Sus_scrofa___PRRX2	6.11607	0.80688	9.59132e-10	2.07334e-07
Sus_scrofa___MEDAG	6.11338	1.04895	9.75451e-10	2.10019e-07
Sus_scrofa___B4GALT1	6.11107	0.855868	9.89639e-10	2.11449e-07
Sus_scrofa___GPD2	6.04351	1.24481	1.50795e-09	3.18301e-07
Sus_scrofa___C3	6.01225	0.829189	1.82964e-09	3.81714e-07
Sus_scrofa___ELL2	5.98756	1.0654	2.13013e-09	4.40987e-07
Sus_scrofa___ENSSSCG00000051306	5.96897	3.09601	2.3876e-09	4.90515e-07
Sus_scrofa___HHAT	5.8207	1.03237	5.86012e-09	1.15541e-06
Sus_scrofa___GADD45B	5.69648	1.43384	1.2231e-08	2.29388e-06
Sus_scrofa___RNF125	5.52032	0.912903	3.38374e-08	6.05093e-06
Sus_scrofa___CTPS1	5.5061	1.21064	3.66866e-08	6.51714e-06
Sus_scrofa___DLG5	5.49566	1.34159	3.89246e-08	6.86937e-06
Sus_scrofa___MALT1	5.45451	1.31275	4.91079e-08	8.53705e-06
Sus_scrofa___KCNQ1	5.42433	1.50881	5.81736e-08	1.00361e-05
Sus_scrofa___AMMECR1	5.39307	1.18543	6.92645e-08	1.18734e-05

## Sheet: vFB7
Gene	scores	log2FC	pvals	FDR
Sus_scrofa___ADGRD1	32.9216	1.62148	1.07775e-237	5.80112e-233
Sus_scrofa___FBN1	26.5027	1.32916	9.03117e-155	2.43056e-150
Sus_scrofa___MFAP5	26.2894	1.6836	2.53518e-152	4.54863e-148
Sus_scrofa___EBF1	26.2654	1.02549	4.7643e-152	6.41108e-148
Sus_scrofa___UAP1	24.1099	2.01549	1.96715e-128	2.11767e-124
Sus_scrofa___ADAMTS5	23.8547	2.10929	9.05659e-126	8.12466e-122
Sus_scrofa___ENSSSCG00000015664	22.7138	3.66252	3.27337e-114	2.51703e-110
Sus_scrofa___ENSSSCG00000011121	22.4609	0.973867	1.00076e-111	6.73337e-108
Sus_scrofa___CAMK1D	21.5757	2.22573	3.03864e-103	1.81731e-99
Sus_scrofa___DCN	21.1653	1.18433	1.99579e-99	1.07425e-95
Sus_scrofa___TNXB	20.1077	1.27173	6.31304e-90	2.61389e-86
Sus_scrofa___GHSR	20.0716	1.59507	1.3073e-89	5.0262e-86
Sus_scrofa___ENSSSCG00000009672	19.0672	1.98267	4.72598e-81	1.58988e-77
Sus_scrofa___SESTD1	18.088	0.978303	3.96207e-73	1.18479e-69
Sus_scrofa___TSPAN5	17.7348	2.29615	2.25795e-70	6.07683e-67
Sus_scrofa___ZCCHC24	17.3825	1.05231	1.11878e-67	2.61824e-64
Sus_scrofa___MMP16	17.2789	1.3388	6.77929e-67	1.52043e-63
Sus_scrofa___STON2	17.0251	1.40078	5.34892e-65	1.15164e-61
Sus_scrofa___SEMA3C	16.2259	2.01546	3.30991e-59	6.85228e-56
Sus_scrofa___REV1	16.0253	1.03393	8.51259e-58	1.69703e-54
Sus_scrofa___PAQR9	15.9149	1.70503	4.99854e-57	9.60898e-54
Sus_scrofa___DDR2	15.8627	0.955944	1.14909e-56	2.13279e-53
Sus_scrofa___PDE7B	15.6614	0.924278	2.77874e-55	4.82478e-52
Sus_scrofa___ZNF662	15.3351	1.21577	4.4577e-53	7.49814e-50
Sus_scrofa___CREB5	14.7675	0.820246	2.37527e-49	3.76033e-46
Sus_scrofa___FRMD3	14.0479	1.18907	7.93132e-45	1.06728e-41
Sus_scrofa___GALNT16	13.8924	2.40194	7.04371e-44	9.02702e-41
Sus_scrofa___DAPK1	13.7641	0.930597	4.18848e-43	4.90106e-40
Sus_scrofa___SDC2	13.7367	1.08722	6.12208e-43	7.01121e-40
Sus_scrofa___ABLIM1	13.4266	1.26728	4.22505e-41	4.54835e-38
Sus_scrofa___FBLN2	13.3822	1.45628	7.68778e-41	8.11377e-38
Sus_scrofa___EFHD1	12.3409	2.00785	5.45119e-35	4.51409e-32
Sus_scrofa___ENSSSCG00000024950	12.2319	1.09441	2.09987e-34	1.66217e-31
Sus_scrofa___GPR1	11.9675	1.71864	5.25889e-33	3.8776e-30
Sus_scrofa___LRRC17	11.5166	1.76263	1.08851e-30	7.41649e-28
Sus_scrofa___TRERF1	11.5122	1.00978	1.14527e-30	7.70564e-28
Sus_scrofa___UGDH	11.4493	1.45321	2.36983e-30	1.5748e-27
Sus_scrofa___GFPT2	11.2923	1.33251	1.43217e-29	9.40099e-27
Sus_scrofa___RGMA	11.2246	0.762733	3.08795e-29	1.91048e-26
Sus_scrofa___ENSSSCG00000017164	10.954	1.02723	6.35691e-28	3.76008e-25
Sus_scrofa___PI15	10.6206	1.56595	2.38968e-26	1.33986e-23
Sus_scrofa___DLG2	10.3193	0.848009	5.76625e-25	3.10374e-22
Sus_scrofa___PHLPP1	10.2066	0.797631	1.85216e-24	9.77394e-22
Sus_scrofa___ENOX1	10.1953	1.0702	2.08192e-24	1.08798e-21
Sus_scrofa___KLF3	9.97739	1.28331	1.91441e-23	9.36775e-21
Sus_scrofa___ITGB5	9.96148	0.985088	2.2469e-23	1.07984e-20
Sus_scrofa___PTPRD	9.7813	0.828938	1.35455e-22	6.23162e-20
Sus_scrofa___COX1	9.77584	0.774768	1.42969e-22	6.52158e-20
Sus_scrofa___PI16	9.5215	2.35733	1.707e-21	7.29214e-19
Sus_scrofa___HTRA3	9.46469	1.68338	2.94437e-21	1.22856e-18
Sus_scrofa___PLXDC1	9.42589	1.21505	4.26465e-21	1.73901e-18
Sus_scrofa___TIMP3	9.40767	0.773033	5.07255e-21	2.0529e-18
Sus_scrofa___TEX26	9.34449	1.24545	9.2335e-21	3.62776e-18
Sus_scrofa___ACKR2	9.04651	0.840831	1.47604e-19	5.55588e-17
Sus_scrofa___SEMA6A	9.02071	0.890767	1.86874e-19	6.88952e-17
Sus_scrofa___EFEMP1	8.92785	0.763585	4.34365e-19	1.55868e-16
Sus_scrofa___IGSF3	8.841	1.18665	9.48642e-19	3.31569e-16
Sus_scrofa___LMX1A	8.64914	1.76754	5.1889e-18	1.69271e-15
Sus_scrofa___CALCRL	8.59525	1.04391	8.30828e-18	2.69398e-15
Sus_scrofa___NTRK2	8.56753	0.806396	1.05728e-17	3.38745e-15
Sus_scrofa___MEDAG	8.4427	1.28234	3.10093e-17	9.48355e-15
Sus_scrofa___RNASE4	8.43245	0.879157	3.38513e-17	1.02942e-14
Sus_scrofa___NHSL1	8.22251	0.935343	1.99291e-16	5.86178e-14
Sus_scrofa___DOP1B	8.1449	1.0693	3.79604e-16	1.09853e-13
Sus_scrofa___FGD5	8.05433	1.06194	7.99151e-16	2.28804e-13
Sus_scrofa___PLD1	7.93756	0.82166	2.06201e-15	5.84155e-13
Sus_scrofa___ENSSSCG00000004578	7.92696	0.932644	2.24569e-15	6.32862e-13
Sus_scrofa___ST3GAL4	7.89099	0.961591	2.99793e-15	8.31787e-13
Sus_scrofa___RADIL	7.86611	1.46256	3.65844e-15	1.00469e-12
Sus_scrofa___MCOLN2	7.81948	2.60271	5.30413e-15	1.4275e-12
Sus_scrofa___CDON	7.7534	1.10228	8.94671e-15	2.38399e-12
Sus_scrofa___DPYSL3	7.67838	0.872596	1.61114e-14	4.20978e-12
Sus_scrofa___AKAP12	7.66614	0.816078	1.77252e-14	4.58691e-12
Sus_scrofa___ENSSSCG00000008533	7.58844	1.78778	3.23771e-14	8.22041e-12
Sus_scrofa___KCNQ5	7.54667	0.789119	4.46525e-14	1.11789e-11
Sus_scrofa___ARHGEF3	7.40662	0.926662	1.29559e-13	3.12719e-11
Sus_scrofa___LURAP1L	7.38111	1.7117	1.56978e-13	3.7721e-11
Sus_scrofa___RAPGEF4	7.33892	0.832582	2.15319e-13	5.08323e-11
Sus_scrofa___NHSL2	7.22921	1.29675	4.85801e-13	1.12226e-10
Sus_scrofa___AGT	7.1657	1.13137	7.73882e-13	1.75759e-10
Sus_scrofa___CFAP94	7.04055	0.85536	1.91486e-12	4.17284e-10
Sus_scrofa___ENSSSCG00000036669	6.87725	1.11002	6.10177e-12	1.273e-09
Sus_scrofa___PCDH9	6.83679	1.08672	8.09889e-12	1.65753e-09
Sus_scrofa___KLHL13	6.81556	1.32464	9.38951e-12	1.89288e-09
Sus_scrofa___STK38	6.7933	0.815241	1.096e-11	2.18494e-09
Sus_scrofa___EZH1	6.74928	0.991267	1.48583e-11	2.94031e-09
Sus_scrofa___ADAMTS19	6.74135	0.882883	1.56926e-11	3.09403e-09
Sus_scrofa___ITGA9	6.5787	0.925566	4.74568e-11	8.98855e-09
Sus_scrofa___C1QTNF7	6.26458	0.799196	3.73822e-10	6.28793e-08
Sus_scrofa___ENSSSCG00000004081	6.25922	1.22134	3.86908e-10	6.48776e-08
Sus_scrofa___ENSSSCG00000023771	6.22675	1.83765	4.76203e-10	7.96029e-08
Sus_scrofa___SPON2	6.17235	0.844476	6.72809e-10	1.11088e-07
Sus_scrofa___EDEM2	5.96747	1.28591	2.40958e-09	3.78129e-07
Sus_scrofa___CAMKK2	5.94859	1.37866	2.70468e-09	4.19545e-07
Sus_scrofa___NOX5	5.94372	2.97881	2.78624e-09	4.30955e-07
Sus_scrofa___NCOA7	5.93582	0.838546	2.92383e-09	4.49652e-07
Sus_scrofa___STIM1	5.92692	0.858239	3.0866e-09	4.73332e-07
Sus_scrofa___KLF2	5.85124	1.89732	4.87926e-09	7.39806e-07
Sus_scrofa___FBXL13	5.83722	1.60753	5.30776e-09	8.00268e-07
Sus_scrofa___LRRC8D	5.71689	0.860325	1.08493e-08	1.57405e-06
