# Supplementary material for: Integrated Molecular Profiling of Preclinical and Clinical Cardiac Xenotransplants
Source: Research Square preprint supplement (doi:10.21203/rs.3.rs-8406985/v1), 2026-02-04
Supplement: Supplementary file 28 [file b3fc2077d75c9383f14156f9.xlsx]

## Sheet: CM
Condition_subsets	Fatty_Acid_Metabolism	Ketone_Metabolism	Lactate_Metabolism	Glycolysis_Glucose_Oxidation	Carbohydrate_Metabolism	Amino_Acid_Metabolism	TCA_Cycle_Mitochondrial_Function	Metabolic_Dysfunction
Control	0.135866	0.159823	-0.0759876	0.00339753	0.0267988	0.0254061	-0.00617305	-0.0327059
3-month protocol	0.154225	0.129568	-0.0846223	-0.00356211	0.0251023	0.00526505	-0.00162684	-0.0223556
6-month protocol	0.116372	0.114779	-0.000632957	0.101051	0.0663401	-0.00395791	-0.0144309	0.0328516
Prematurely terminated	0.0475898	0.135073	-0.0636862	0.00955358	0.0311408	-0.0109931	-0.005974	-0.0282761
PCMV/PRV	0.0791904	0.0772915	-0.0704762	0.0158265	0.0859415	-0.0232098	-0.0145361	0.0418837
Rejection	0.0871926	0.111485	-0.0417323	0.0190279	0.0924804	0.00486282	-0.0159982	0.0518618

## Sheet: FB
Condition_subsets	Fatty_Acid_Metabolism	Ketone_Metabolism	Lactate_Metabolism	Glycolysis_Glucose_Oxidation	Carbohydrate_Metabolism	Amino_Acid_Metabolism	TCA_Cycle_Mitochondrial_Function	Metabolic_Dysfunction
Control	-0.0865603	-0.0752291	-0.0796824	-0.0757436	-0.0624277	-0.0789104	-0.0890607	-0.0479156
3-month protocol	-0.0808256	-0.0741023	-0.0787715	-0.0391257	-0.0689064	-0.0477494	-0.0956037	-0.0502605
6-month protocol	-0.0794013	-0.0810451	-0.0635062	0.00563072	-0.0507109	-0.0384928	-0.0819757	-0.0495678
Prematurely terminated	-0.0826225	-0.0916876	-0.075492	-0.0166105	-0.0572125	-0.048137	-0.0577938	-0.0191202
PCMV/PRV	-0.0907757	-0.0984733	-0.08857	-0.0331457	-0.0592396	-0.0417095	-0.0885459	-0.0628939
Rejection	-0.0980656	-0.0878865	-0.0586045	-0.0286023	-0.0582224	-0.0358104	-0.0887852	-0.0542997

## Sheet: Vasc_EC
Condition_subsets	Fatty_Acid_Metabolism	Ketone_Metabolism	Lactate_Metabolism	Glycolysis_Glucose_Oxidation	Carbohydrate_Metabolism	Amino_Acid_Metabolism	TCA_Cycle_Mitochondrial_Function	Metabolic_Dysfunction
Control	-0.0741624	-0.0723503	-0.0833567	-0.0500227	-0.0666844	-0.07516	-0.0818335	-0.0442263
3-month protocol	-0.0747478	-0.0789818	-0.0771213	-0.00504961	-0.0602301	-0.0524086	-0.0822832	-0.0249015
6-month protocol	-0.0775727	-0.0822811	-0.0501557	0.0295529	-0.0471313	-0.0261904	-0.079824	-0.0246049
Prematurely terminated	-0.0691849	-0.0688137	-0.0320559	0.00530796	-0.0606875	-0.0613045	-0.0662028	0.0332663
PCMV/PRV	-0.0825093	-0.0983358	-0.00371883	0.00459589	-0.0467077	-0.0429065	-0.0505011	0.0386342
Rejection	-0.0846851	-0.0895575	-0.0422413	-0.000199648	-0.0513812	-0.0416828	-0.0742408	-0.0061113

## Sheet: Endo_lymph_EC
Condition_subsets	Fatty_Acid_Metabolism	Ketone_Metabolism	Lactate_Metabolism	Glycolysis_Glucose_Oxidation	Carbohydrate_Metabolism	Amino_Acid_Metabolism	TCA_Cycle_Mitochondrial_Function	Metabolic_Dysfunction
Control	-0.0912055	-0.0951154	-0.104314	-0.0673048	-0.065909	-0.0753008	-0.104932	-0.0599434
3-month protocol	-0.0772524	-0.0876756	-0.0615571	-0.0276798	-0.0647615	-0.0442499	-0.0941316	-0.040159
6-month protocol	-0.0695004	-0.0793077	-0.00112217	0.0311109	-0.0392658	-0.0237809	-0.0778845	-0.00551271
Prematurely terminated	-0.0777449	-0.102915	-0.037197	-0.0222888	-0.0592584	-0.0488703	-0.0712341	-0.0126867
PCMV/PRV	-0.0794228	-0.0992986	0.0560389	-0.0182263	-0.0240547	-0.0352136	-0.0614263	0.0545459
Rejection	-0.0761676	-0.0843819	-0.0147938	-0.0030435	-0.0311273	-0.0172768	-0.0782195	-0.00451688

## Sheet: EC_papio
Condition_subsets	Fatty_Acid_Metabolism	Ketone_Metabolism	Lactate_Metabolism	Glycolysis_Glucose_Oxidation	Carbohydrate_Metabolism	Amino_Acid_Metabolism	TCA_Cycle_Mitochondrial_Function	Metabolic_Dysfunction
3-month protocol	-0.0277727	-0.0682783	-0.0367816	-0.0188757	-0.0746565	-0.0381987	-0.0780551	-0.0351564
6-month protocol	-0.0617601	-0.0752652	0.0572989	0.00427535	-0.0308161	-0.0364679	-0.0536868	-0.0031762
Prematurely terminated	-0.0669962	-0.0697619	-0.072777	0.0321412	-0.0573217	-0.0533111	-0.0534281	-0.0664355
Rejection	-0.0473894	-0.0806347	-0.0963058	0.00962597	-0.0636352	0.00446578	-0.0818617	-0.0586475

## Sheet: Lymph_papio
Condition_subsets	Fatty_Acid_Metabolism	Ketone_Metabolism	Lactate_Metabolism	Glycolysis_Glucose_Oxidation	Carbohydrate_Metabolism	Amino_Acid_Metabolism	TCA_Cycle_Mitochondrial_Function	Metabolic_Dysfunction
3-month protocol	-0.0600521	-0.063226	-0.066609	-0.0331305	-0.0571217	-0.0248478	-0.0744145	-0.058904
6-month protocol	-0.0641984	-0.0694165	-0.0720953	-0.00949713	-0.0621927	-0.0207038	-0.0806725	-0.0615075
Prematurely terminated	-0.0697779	-0.0709211	-0.0679278	-0.0241465	-0.0721875	0.0142693	-0.0688955	-0.0690844
PCMV/PRV	-0.0427922	-0.0664677	-0.0723281	-0.00902975	-0.0794021	0.0372642	-0.0955667	-0.0678546
Rejection	-0.0707406	-0.067029	-0.0670898	-0.0128893	-0.0660957	-0.00174796	-0.0726641	-0.0591031

## Sheet: Mast_papio
Condition_subsets	Fatty_Acid_Metabolism	Ketone_Metabolism	Lactate_Metabolism	Glycolysis_Glucose_Oxidation	Carbohydrate_Metabolism	Amino_Acid_Metabolism	TCA_Cycle_Mitochondrial_Function	Metabolic_Dysfunction
3-month protocol	-0.0558041	-0.0699803	-0.0905634	0.038722	-0.0233082	-0.00443604	-0.0475704	-0.0257509
6-month protocol	-0.074583	-0.0463534	-0.0191378	0.0143247	-0.0127214	-0.043845	-0.108021	-0.0436782
Rejection	-0.0352092	-0.0692803	-0.0739512	-0.0144402	-0.0606999	-0.0276264	-0.0755649	-0.0481067

## Sheet: MC
Condition_subsets	Fatty_Acid_Metabolism	Ketone_Metabolism	Lactate_Metabolism	Glycolysis_Glucose_Oxidation	Carbohydrate_Metabolism	Amino_Acid_Metabolism	TCA_Cycle_Mitochondrial_Function	Metabolic_Dysfunction
Control	-0.0612794	-0.065252	-0.079034	-0.0751258	-0.0738281	-0.08183	-0.0848793	-0.0578529
3-month protocol	-0.0633843	-0.0714922	-0.0791798	-0.0454545	-0.0650936	-0.0645704	-0.093445	-0.0594714
6-month protocol	-0.0617986	-0.0816101	-0.0602703	-0.0261935	-0.0561456	-0.0545665	-0.0846932	-0.049911
Prematurely terminated	-0.0767718	-0.0879669	-0.0912306	-0.0485814	-0.072535	-0.0620129	-0.0926024	-0.0621614
PCMV/PRV	-0.0741823	-0.0866461	-0.075046	-0.0409531	-0.0544573	-0.0591572	-0.0897404	-0.0534277
Rejection	-0.080159	-0.0888656	-0.0729934	-0.0276737	-0.0418015	-0.050022	-0.0931149	-0.0567666

## Sheet: Mye_papio
Condition_subsets	Fatty_Acid_Metabolism	Ketone_Metabolism	Lactate_Metabolism	Glycolysis_Glucose_Oxidation	Carbohydrate_Metabolism	Amino_Acid_Metabolism	TCA_Cycle_Mitochondrial_Function	Metabolic_Dysfunction
3-month protocol	-0.0677707	-0.0682952	-0.0818779	-0.00299045	-0.0630671	-0.0401562	-0.0895755	-0.0469701
6-month protocol	-0.0680945	-0.0711457	-0.0329352	0.0297227	-0.0566052	-0.0286811	-0.0930948	-0.0233074
Prematurely terminated	-0.0586414	-0.0695008	-0.0837025	0.0217922	-0.0540595	0.0155459	-0.0950288	-0.0129533
PCMV/PRV	-0.0534308	-0.00458177	0.0883222	0.00928014	-0.0551951	0.0225299	-0.0843599	0.0241643
Rejection	-0.0680533	-0.0745752	-0.065704	0.0376646	-0.0606734	-0.0430056	-0.0883581	-0.0439592

## Sheet: NC
Condition_subsets	Fatty_Acid_Metabolism	Ketone_Metabolism	Lactate_Metabolism	Glycolysis_Glucose_Oxidation	Carbohydrate_Metabolism	Amino_Acid_Metabolism	TCA_Cycle_Mitochondrial_Function	Metabolic_Dysfunction
Control	-0.0586726	-0.0825646	-0.0667142	-0.0569755	-0.0557329	-0.0577585	-0.0731237	-0.0626087
3-month protocol	-0.0526506	-0.0731458	-0.062333	-0.0358559	-0.0548167	-0.0227067	-0.0607366	-0.0603601
6-month protocol	-0.0566833	-0.0763965	-0.0515937	0.0295648	-0.0524403	-0.0161059	-0.0570491	-0.0517773
Prematurely terminated	-0.0725	-0.089959	-0.0704437	-0.0273464	-0.0569396	-0.0348427	-0.0543868	-0.0668251
PCMV/PRV	-0.0498155	-0.0956981	-0.0686944	-0.0267443	-0.0178459	-0.0612169	-0.0559955	-0.062718
Rejection	-0.0534597	-0.0851942	-0.0581051	-0.0177438	-0.0394944	-0.0260125	-0.0706491	-0.0646226

[truncated: 1 more sheets: Res_Immune]
