# Supplementary material for: Integrated Molecular Profiling of Preclinical and Clinical Cardiac Xenotransplants
Source: Research Square preprint supplement (doi:10.21203/rs.3.rs-8406985/v1), 2026-02-04
Supplement: Supplementary file 29 [file b5bb1027c2415ead3b6dae0e.xlsx]

## Sheet: CM
Gene_set	Term	Overlap	P-value	Adjusted P-value	Old P-value	Old Adjusted P-value	Odds Ratio	Combined Score	Genes	Regulation
MSigDB_Hallmark_2020	Interferon Alpha Response	29/97	1.04273e-24	4.58799e-23	0	0	19.4519	1074.14	LGALS3BP;UBA7;CNP;SAMD9;UBE2L6;IFI35;TMEM140;DDX60;IFIT2;OASL;B2M;BATF2;RSAD2;SP110;IL15;MX1;ISG15;NMI;PARP14;PARP9;PSMB8;PSMB9;BST2;ISG20;MOV10;CXCL11;PLSCR1;IRF1;CMPK2	Up-regulated
MSigDB_Hallmark_2020	Interferon Gamma Response	35/200	4.15684e-21	9.14504e-20	0	0	9.76413	458.226	CD86;LGALS3BP;UBE2L6;IFI35;IFIT1;DDX60;HIF1A;IFIT2;OASL;CCL5;UPP1;B2M;ZBP1;BATF2;RSAD2;SP110;IL15;P2RY14;MX2;MX1;ISG15;NMI;PARP14;PSMB8;PSMB9;BST2;ISG20;PLSCR1;CXCL11;ZNFX1;OAS2;IRF1;CMPK2;MYD88;PFKP	Up-regulated
MSigDB_Hallmark_2020	Hypoxia	22/200	1.21206e-09	1.77768e-08	0	0	5.51509	113.23	ERO1A;KDM3A;WSB1;PFKFB3;HSPA5;ADM;AK4;ENO1;ETS1;NDRG1;HS3ST1;LDHC;ISG20;PFKL;FAM162A;STC2;DDIT4;PGK1;HMOX1;PFKP;CHST3;TMEM45A	Up-regulated
MSigDB_Hallmark_2020	Glycolysis	17/200	3.60858e-06	3.96944e-05	0	0	4.09695	51.3438	ERO1A;G6PD;HSPA5;MPI;PLOD2;AK4;ENO1;PLOD1;LDHC;ISG20;PKM;FAM162A;STC2;DDIT4;PGK1;SLC16A3;PFKP	Up-regulated
MSigDB_Hallmark_2020	TNF-alpha Signaling via NF-kB	16/200	1.49543e-05	0.000109665	0	0	3.82609	42.5098	DUSP4;EDN1;PFKFB3;LIF;RNF19B;SLC2A6;KLF2;IFIT2;PANX1;CXCL11;IRF1;CCL5;NINJ1;CCL4;NFKBIE;LDLR	Up-regulated
MSigDB_Hallmark_2020	Inflammatory Response	16/200	1.49543e-05	0.000109665	0	0	3.82609	42.5098	EDN1;IL15;ITGB3;EBI3;LIF;ADM;NMI;OSMR;TNFRSF1B;HIF1A;BST2;CXCL11;IRF1;CCL5;LDLR;TLR3	Up-regulated
MSigDB_Hallmark_2020	mTORC1 Signaling	14/200	0.000210191	0.00115605	0	0	3.2965	27.9131	ERO1A;G6PD;HSPA5;EDEM1;PLOD2;AK4;ENO1;UFM1;PFKL;DDIT4;PGK1;TRIB3;NUPR1;LDLR	Up-regulated
MSigDB_Hallmark_2020	p53 Pathway	14/200	0.000210191	0.00115605	0	0	3.2965	27.9131	PMM1;APAF1;LIF;RNF19B;KLK8;NDRG1;ZFP36L1;FAM162A;DDIT4;NINJ1;HMOX1;TRIB3;NUPR1;UPP1	Up-regulated
MSigDB_Hallmark_2020	Unfolded Protein Response	10/113	0.0002633	0.00128725	0	0	4.23201	34.8811	ERO1A;HSPA5;STC2;EDEM1;DDIT4;EIF4EBP1;DNAJB9;HYOU1;IFIT1;HERPUD1	Up-regulated
MSigDB_Hallmark_2020	IL-6/JAK/STAT3 Signaling	1987-08-01	0.000831689	0.00365943	0	0	4.39986	31.2041	CXCL11;ITGB3;IRF1;EBI3;HMOX1;OSMR;TNFRSF1B;MYD88	Up-regulated
MSigDB_Hallmark_2020	Allograft Rejection	12/200	0.00220866	0.00883463	0	0	2.78263	17.0168	CD86;SRGN;IL15;ELF4;CCL5;CCL4;LIF;B2M;HIF1A;ETS1;HLA-DOB;TLR3	Up-regulated
MSigDB_Hallmark_2020	Complement	11/200	0.00635309	0.0232947	0	0	2.53142	12.806	LGALS3;PLSCR1;RABIF;GCA;HSPA5;ERAP2;IRF1;CCL5;CTSH;LIPA;PSMB9	Up-regulated
MSigDB_Hallmark_2020	Apoptosis	9/161	0.0117242	0.0396819	0	0	2.5687	11.4207	ISG20;TOP2A;LGALS3;ERBB3;IRF1;PMAIP1;HMOX1;TSPO;BID	Up-regulated

## Sheet: Endo_lymph_EC
Gene_set	Term	Overlap	P-value	Adjusted P-value	Old P-value	Old Adjusted P-value	Odds Ratio	Combined Score	Genes	Regulation
MSigDB_Hallmark_2020	Hypoxia	7/200	1.55878e-06	4.2087e-05	0	0	14.3264	191.567	DTNA;PFKFB3;GBE1;RRAGD;IRS2;HK2;VEGFA	Up-regulated
MSigDB_Hallmark_2020	Interferon Alpha Response	1997-04-01	0.000168638	0.00227661	0	0	16.1087	139.949	RSAD2;ISG15;DDX60;OASL	Up-regulated
MSigDB_Hallmark_2020	Glycolysis	5/200	0.000261149	0.00235034	0	0	9.73767	80.3399	HOMER1;RRAGD;IRS2;HK2;VEGFA	Up-regulated
MSigDB_Hallmark_2020	Interferon Gamma Response	4/200	0.00253414	0.0114036	0	0	7.60377	45.4546	RSAD2;ISG15;DDX60;OASL	Up-regulated
MSigDB_Hallmark_2020	mTORC1 Signaling	4/200	0.00253414	0.0114036	0	0	7.60377	45.4546	TFRC;GBE1;HK2;CTSC	Up-regulated
MSigDB_Hallmark_2020	KRAS Signaling Up	4/200	0.00253414	0.0114036	0	0	7.60377	45.4546	ANO1;PCP4;EPB41L3;MAP7	Up-regulated
MSigDB_Hallmark_2020	Hedgehog Signaling	1936-02-01	0.0047244	0.0182227	0	0	21.293	114.025	HEY2;VEGFA	Up-regulated
MSigDB_Hallmark_2020	IL-2/STAT5 Signaling	3/199	0.0191583	0.0436758	0	0	5.59722	22.1371	RRAGD;CDC6;HK2	Up-regulated
MSigDB_Hallmark_2020	TNF-alpha Signaling via NF-kB	3/200	0.0194114	0.0436758	0	0	5.56853	21.9505	PFKFB3;IRS2;VEGFA	Up-regulated
MSigDB_Hallmark_2020	Adipogenesis	3/200	0.0194114	0.0436758	0	0	5.56853	21.9505	PFKFB3;HSPB8;GBE1	Up-regulated
MSigDB_Hallmark_2020	Estrogen Response Late	3/200	0.0194114	0.0436758	0	0	5.56853	21.9505	PCP4;HSPB8;CDC6	Up-regulated
MSigDB_Hallmark_2020	Myogenesis	3/200	0.0194114	0.0436758	0	0	5.56853	21.9505	DTNA;HSPB8;NCAM1	Up-regulated
MSigDB_Hallmark_2020	Fatty Acid Metabolism	1/158	0.0157379	0.0199003	0	0	126.376	524.673	FMO1	Down-regulated
MSigDB_Hallmark_2020	UV Response Up	1/158	0.0157379	0.0199003	0	0	126.376	524.673	FMO1	Down-regulated
MSigDB_Hallmark_2020	Xenobiotic Metabolism	1/200	0.0199003	0.0199003	0	0	99.4925	389.714	FMO1	Down-regulated
MSigDB_Hallmark_2020	Epithelial Mesenchymal Transition	1/200	0.0199003	0.0199003	0	0	99.4925	389.714	ABI3BP	Down-regulated

## Sheet: Lymph_papio
Gene_set	Term	Overlap	P-value	Adjusted P-value	Old P-value	Old Adjusted P-value	Odds Ratio	Combined Score	Genes	Regulation
MSigDB_Hallmark_2020	Coagulation	1/138	0.0205584	0.0297023	0	0	72.4818	281.554	VWF	Up-regulated
MSigDB_Hallmark_2020	Apical Junction	1/200	0.0297023	0.0297023	0	0	49.7437	174.925	VWF	Up-regulated

## Sheet: MC
Gene_set	Term	Overlap	P-value	Adjusted P-value	Old P-value	Old Adjusted P-value	Odds Ratio	Combined Score	Genes	Regulation
MSigDB_Hallmark_2020	Interferon Alpha Response	1997-01-01	0.0240181	0.0490145	0	0	51.8203	193.235	RSAD2	Up-regulated
MSigDB_Hallmark_2020	Androgen Response	1/100	0.0247535	0.0490145	0	0	50.2424	185.836	NDRG1	Up-regulated
MSigDB_Hallmark_2020	Coagulation	1/138	0.0340303	0.0490145	0	0	36.2372	122.5	PLAT	Up-regulated
MSigDB_Hallmark_2020	Apoptosis	1/161	0.0396109	0.0490145	0	0	30.9922	100.063	PLAT	Up-regulated
MSigDB_Hallmark_2020	IL-2/STAT5 Signaling	1/199	0.0487743	0.0490145	0	0	24.9962	75.5023	NDRG1	Up-regulated
MSigDB_Hallmark_2020	KRAS Signaling Up	1/200	0.0490145	0.0490145	0	0	24.8693	74.997	PLAT	Up-regulated
MSigDB_Hallmark_2020	KRAS Signaling Dn	1/200	0.0490145	0.0490145	0	0	24.8693	74.997	RSAD2	Up-regulated
MSigDB_Hallmark_2020	Hypoxia	1/200	0.0490145	0.0490145	0	0	24.8693	74.997	NDRG1	Up-regulated
MSigDB_Hallmark_2020	Interferon Gamma Response	1/200	0.0490145	0.0490145	0	0	24.8693	74.997	RSAD2	Up-regulated
MSigDB_Hallmark_2020	p53 Pathway	1/200	0.0490145	0.0490145	0	0	24.8693	74.997	NDRG1	Up-regulated
MSigDB_Hallmark_2020	Complement	1/200	0.0490145	0.0490145	0	0	24.8693	74.997	PLAT	Up-regulated
MSigDB_Hallmark_2020	UV Response Dn	1/144	0.0284924	0.0394067	0	0	46.2774	164.66	PLCB4	Down-regulated
MSigDB_Hallmark_2020	KRAS Signaling Up	1/200	0.0394067	0.0394067	0	0	33.1608	107.236	SPARCL1	Down-regulated
MSigDB_Hallmark_2020	Adipogenesis	1/200	0.0394067	0.0394067	0	0	33.1608	107.236	SPARCL1	Down-regulated

## Sheet: Mye_papio
Gene_set	Term	Overlap	P-value	Adjusted P-value	Old P-value	Old Adjusted P-value	Odds Ratio	Combined Score	Genes	Regulation
MSigDB_Hallmark_2020	Epithelial Mesenchymal Transition	15/200	1.25687e-12	3.8963e-11	0	0	15.0643	412.797	POSTN;COL12A1;SERPINE1;HTRA1;VEGFC;PLOD2;VEGFA;COL1A2;COL4A2;CALD1;COL4A1;COL5A3;COL6A2;COL6A3;FERMT2	Up-regulated
MSigDB_Hallmark_2020	Hypoxia	7/200	0.000217295	0.00151599	0	0	6.26316	52.8251	GBE1;SERPINE1;MXI1;SLC2A1;SLC2A5;NDRG1;VEGFA	Up-regulated
MSigDB_Hallmark_2020	Myogenesis	7/200	0.000217295	0.00151599	0	0	6.26316	52.8251	WWTR1;COL4A2;COL6A2;COL6A3;CDH13;IGFBP7;CD36	Up-regulated
MSigDB_Hallmark_2020	Complement	7/200	0.000217295	0.00151599	0	0	6.26316	52.8251	COL4A2;DOCK9;CPQ;SERPINE1;CDH13;CD36;ZFPM2	Up-regulated
MSigDB_Hallmark_2020	UV Response Dn	6/144	0.000244514	0.00151599	0	0	7.46352	62.0684	COL1A2;RBPMS;MAP1B;SERPINE1;SYNJ2;PLPP3	Up-regulated
MSigDB_Hallmark_2020	TGF-beta Signaling	1954-04-01	0.000319106	0.00164872	0	0	13.5583	109.144	WWTR1;SERPINE1;SPTBN1;ENG	Up-regulated
MSigDB_Hallmark_2020	Coagulation	4/138	0.00989954	0.0438408	0	0	5.03763	23.25	VWF;CPQ;SERPINE1;HTRA1	Up-regulated
MSigDB_Hallmark_2020	Allograft Rejection	1/200	0.0394067	0.0394067	0	0	33.1608	107.236	HLA-DMB	Down-regulated

## Sheet: NC
Gene_set	Term	Overlap	P-value	Adjusted P-value	Old P-value	Old Adjusted P-value	Odds Ratio	Combined Score	Genes	Regulation
MSigDB_Hallmark_2020	KRAS Signaling Up	1/200	0.0297023	0.0297023	0	0	49.7437	174.925	VWA5A	Up-regulated
MSigDB_Hallmark_2020	Interferon Gamma Response	1/200	0.0297023	0.0297023	0	0	49.7437	174.925	MX2	Up-regulated
MSigDB_Hallmark_2020	p53 Pathway	1/200	0.0297023	0.0297023	0	0	49.7437	174.925	VWA5A	Up-regulated

## Sheet: Res_Immune
Gene_set	Term	Overlap	P-value	Adjusted P-value	Old P-value	Old Adjusted P-value	Odds Ratio	Combined Score	Genes	Regulation
MSigDB_Hallmark_2020	TNF-alpha Signaling via NF-kB	11/200	3.98353e-09	1.51374e-07	0	0	13.1876	255.062	KLF10;STAT5A;NFKBIA;IFIH1;GADD45B;CCL5;TNFAIP3;HES1;IRS2;MXD1;IFIT2	Up-regulated
MSigDB_Hallmark_2020	E2F Targets	10/200	5.20819e-08	9.89555e-07	0	0	11.7895	197.715	TOP2A;WEE1;DIAPH3;RFC2;TUBB;TRA2B;ATAD2;SMC4;POLE;EZH2	Up-regulated
MSigDB_Hallmark_2020	G2-M Checkpoint	9/200	6.09849e-07	4.63485e-06	0	0	10.4358	149.338	TOP2A;HIRA;HSPA8;NCL;TRA2B;AMD1;SMC4;POLE;EZH2	Up-regulated
MSigDB_Hallmark_2020	Interferon Gamma Response	9/200	6.09849e-07	4.63485e-06	0	0	10.4358	149.338	NFKBIA;IFIH1;RSAD2;CCL5;TNFAIP3;TXNIP;ISG15;IFIT1;IFIT2	Up-regulated
MSigDB_Hallmark_2020	Myc Targets V1	9/200	6.09849e-07	4.63485e-06	0	0	10.4358	149.338	RRM1;HSP90AB1;TRA2B;SERBP1;TCP1;DHX15;HSPE1;SNRPA;HSPD1	Up-regulated
MSigDB_Hallmark_2020	mTORC1 Signaling	7/200	5.77478e-05	0.000365736	0	0	7.85532	76.6634	HSPA5;CACYBP;NUPR1;ENO1;HSPE1;HK2;HSPD1	Up-regulated
MSigDB_Hallmark_2020	Interferon Alpha Response	1997-05-01	0.000115002	0.000624298	0	0	11.5767	105.007	IFIH1;RSAD2;TXNIP;ISG15;IFIT2	Up-regulated
MSigDB_Hallmark_2020	Apoptosis	6/161	0.000141671	0.000672937	0	0	8.3087	73.6317	TOP2A;WEE1;GADD45B;HSPB1;TXNIP;CLU	Up-regulated
MSigDB_Hallmark_2020	Hypoxia	6/200	0.000455161	0.00192179	0	0	6.62528	50.9806	HSPA5;NOCT;TNFAIP3;IRS2;ENO1;HK2	Up-regulated
MSigDB_Hallmark_2020	TGF-beta Signaling	1954-03-01	0.00236102	0.00897187	0	0	12.2916	74.348	KLF10;ARID4B;TRIM33	Up-regulated
MSigDB_Hallmark_2020	Myc Targets V2	1958-03-01	0.0028959	0.00964723	0	0	11.3954	66.6	HSPE1;HK2;HSPD1	Up-regulated
MSigDB_Hallmark_2020	Complement	5/200	0.00304649	0.00964723	0	0	5.43342	31.4799	HSPA5;CSRP1;CCL5;TNFAIP3;CLU	Up-regulated
MSigDB_Hallmark_2020	UV Response Up	4/158	0.00762416	0.022286	0	0	5.45676	26.6095	NFKBIA;DNAJB1;RRAD;AMD1	Up-regulated
MSigDB_Hallmark_2020	Inflammatory Response	4/200	0.0169055	0.0401507	0	0	4.27833	17.4561	NFKBIA;SLC31A1;CCL5;MXD1	Up-regulated
MSigDB_Hallmark_2020	Glycolysis	4/200	0.0169055	0.0401507	0	0	4.27833	17.4561	HSPA5;IRS2;ENO1;HK2	Up-regulated
MSigDB_Hallmark_2020	p53 Pathway	4/200	0.0169055	0.0401507	0	0	4.27833	17.4561	RRAD;TXNIP;NUPR1;MXD1	Up-regulated
