# Supplementary material for: Integrated Molecular Profiling of Preclinical and Clinical Cardiac Xenotransplants
Source: Research Square preprint supplement (doi:10.21203/rs.3.rs-8406985/v1), 2026-02-04
Supplement: Supplementary file 30 [file b6a1460a308ee453c916b045.xlsx]

## Sheet: Hypoxia_vCM
Gene	scores	log2FC	pvals	FDR
Sus_scrofa___HK2	110.78	3.55282	0	0
Sus_scrofa___HK1	104.117	1.449	0	0
Sus_scrofa___SNAPC1	101.763	2.33054	0	0
Sus_scrofa___ERO1A	100.434	2.49206	0	0
Sus_scrofa___VEGFA	96.6149	1.83044	0	0
Sus_scrofa___ENO1	95.6103	2.22305	0	0
Sus_scrofa___CAMK2A	95.5531	1.22345	0	0
Sus_scrofa___HIF1A	87.5924	2.07956	0	0
Sus_scrofa___RNF19A	80.6401	1.03043	0	0
Sus_scrofa___SYCP2	80.1961	1.97317	0	0
Sus_scrofa___WSB1	80.1145	1.8036	0	0
Sus_scrofa___BNIP3	79.6825	2.66916	0	0
Sus_scrofa___P4HA1	79.4726	1.5426	0	0
Sus_scrofa___PCSK5	78.6574	1.33291	0	0
Sus_scrofa___KDM4C	78.2194	1.01725	0	0
Sus_scrofa___GPI	77.5124	1.10925	0	0
Sus_scrofa___SUN2	77.3692	1.90269	0	0
Sus_scrofa___ENSSSCG00000022925	74.3318	1.8219	0	0
Sus_scrofa___GBE1	73.4552	0.8647	0	0
Sus_scrofa___ZNF292	71.6587	1.04444	0	0
Sus_scrofa___KDM3A	71.3778	1.83418	0	0
Sus_scrofa___PPARA	69.1229	0.894118	0	0
Sus_scrofa___IVNS1ABP	68.2813	0.798437	0	0
Sus_scrofa___TSPAN15	66.0203	1.82754	0	0
Sus_scrofa___MLPH	64.6187	1.46667	0	0
Sus_scrofa___ACO2	64.2254	0.837242	0	0
Sus_scrofa___UCK2	64.1382	1.37496	0	0
Sus_scrofa___TMEM245	63.7152	0.881115	0	0
Sus_scrofa___PKM	62.9748	1.27231	0	0
Sus_scrofa___ZNF395	61.7349	1.70776	0	0
Sus_scrofa___PACSIN2	61.4591	0.973307	0	0
Sus_scrofa___ENSSSCG00000017164	58.951	2.62708	0	0
Sus_scrofa___HMOX2	58.5007	1.18125	0	0
Sus_scrofa___RPP30	57.805	0.961523	0	0
Sus_scrofa___ENSSSCG00000008137	57.5789	0.754738	0	0
Sus_scrofa___NMRAL1	54.3196	1.39852	0	0
Sus_scrofa___PLOD2	53.8484	2.76944	0	0
Sus_scrofa___ENSSSCG00000006061	53.0714	0.907118	0	0
Sus_scrofa___SLC4A4	52.1118	1.01583	0	0
Sus_scrofa___ENSSSCG00000010172	50.9993	1.01098	0	0
Sus_scrofa___EGLN3	50.7156	1.50336	0	0
Sus_scrofa___SWT1	48.8806	0.755669	0	0
Sus_scrofa___ENSSSCG00000013366	48.0437	2.94642	0	0
Sus_scrofa___FAM162A	47.3759	1.24582	0	0
Sus_scrofa___KDM5B	47.3595	0.98834	0	0
Sus_scrofa___LIMD1	45.0735	1.21332	0	0
Sus_scrofa___SLC19A2	44.8449	1.13947	0	0
Sus_scrofa___UBAP1	42.6474	0.90945	0	0
Sus_scrofa___STC2	42.1752	1.19342	0	0
Sus_scrofa___FBXO39	40.1477	1.22739	0	0
Sus_scrofa___DDIT4	39.7248	3.83759	0	0
Sus_scrofa___NAV1	39.7241	1.01858	0	0
Sus_scrofa___PDK1	39.6499	1.42456	0	0
Sus_scrofa___ARFGAP3	38.8453	0.988893	0	0
Sus_scrofa___PFKFB3	36.586	2.88763	4.77678e-293	9.62978e-291
Sus_scrofa___RFTN1	36.5584	0.793811	1.31366e-292	2.6384e-290
Sus_scrofa___KDM4B	36.0988	0.81251	2.37165e-285	4.69325e-283
Sus_scrofa___NMNAT3	36.0082	1.44755	6.2269e-284	1.22324e-281
Sus_scrofa___UBC	35.8649	1.05709	1.07801e-281	2.10235e-279
Sus_scrofa___ENSSSCG00000033654	35.764	0.812202	4.00734e-280	7.75896e-278
Sus_scrofa___ENSSSCG00000023041	35.3519	2.32729	9.37725e-274	1.78353e-271
Sus_scrofa___PGK1	35.3211	1.71146	2.7841e-273	5.25814e-271
Sus_scrofa___SPCS2	35.3023	0.852379	5.40956e-273	1.01809e-270
Sus_scrofa___AEBP2	34.8093	0.750265	1.75891e-265	3.27596e-263
Sus_scrofa___ENSSSCG00000009208	34.1733	1.07962	6.02522e-256	1.07745e-253
Sus_scrofa___MACROD2	33.5195	1.02326	2.50884e-246	4.35616e-244
Sus_scrofa___ENSSSCG00000022128	32.4578	0.922898	4.20144e-231	6.85293e-229
Sus_scrofa___CANX	31.6226	0.872512	1.80391e-219	2.7982e-217
Sus_scrofa___POLH	31.6005	0.866676	3.63107e-219	5.61627e-217
Sus_scrofa___PLOD1	31.5232	2.47311	4.18421e-218	6.45327e-216
Sus_scrofa___GPR157	31.2033	0.904899	9.61257e-214	1.4616e-211
Sus_scrofa___NWD1	30.7637	0.904308	8.01319e-208	1.17846e-205
Sus_scrofa___ACSS1	30.3972	1.12309	5.97325e-203	8.61974e-201
Sus_scrofa___GPC6	29.9809	0.753173	1.7417e-197	2.44775e-195
Sus_scrofa___SMIM2	29.9012	2.61935	1.90124e-196	2.65119e-194
Sus_scrofa___NARF	29.5294	1.5351	1.20603e-191	1.66025e-189
Sus_scrofa___OSBPL5	29.5117	1.05865	2.03723e-191	2.79735e-189
Sus_scrofa___ELAPOR2	29.4393	1.42038	1.7273e-190	2.3419e-188
Sus_scrofa___SEMA4B	29.3456	0.983694	2.72257e-189	3.6728e-187
Sus_scrofa___BNIP3L	28.9852	1.50754	1.01069e-184	1.34656e-182
Sus_scrofa___SND1	28.8014	0.842386	2.06247e-182	2.72094e-180
Sus_scrofa___DOCK9	28.5296	1.22926	5.0356e-179	6.51554e-177
Sus_scrofa___ANO10	28.4181	0.862366	1.20772e-177	1.54044e-175
Sus_scrofa___ULK4	27.9995	1.25679	1.64898e-172	2.04984e-170
Sus_scrofa___SPI1	27.953	2.16338	6.06153e-172	7.5177e-170
Sus_scrofa___RANBP6	27.9082	1.08712	2.12412e-171	2.62231e-169
Sus_scrofa___P3H1	27.7406	0.816298	2.2594e-169	2.78294e-167
Sus_scrofa___SLCO6A1	27.7098	0.862813	5.31605e-169	6.51804e-167
Sus_scrofa___HEY2	27.6002	0.984325	1.10746e-167	1.35171e-165
Sus_scrofa___GAPDH	27.4287	1.04728	1.24733e-165	1.50199e-163
Sus_scrofa___MGAT4A	27.3294	1.08573	1.90003e-164	2.27269e-162
Sus_scrofa___ZNF274	27.0488	0.95351	3.94214e-161	4.59285e-159
Sus_scrofa___BHLHE40	27.0389	1.90836	5.16392e-161	6.00331e-159
Sus_scrofa___SNX8	26.9892	1.01357	1.97808e-160	2.28972e-158
Sus_scrofa___ASAP2	26.5185	2.47034	5.93866e-155	6.68733e-153
Sus_scrofa___NAMPT	26.0279	0.76709	2.3925e-149	2.60159e-147
Sus_scrofa___INTS6L	25.6301	1.0187	7.04427e-145	7.56816e-143
Sus_scrofa___ABHD5	25.4031	1.66203	2.32939e-142	2.46814e-140
Sus_scrofa___PPP1R3C	25.0028	0.932577	5.69792e-138	5.94372e-136
Sus_scrofa___TNNT1	24.8046	1.43924	7.99518e-136	8.24422e-134

## Sheet: Prolif_vCM
Gene	scores	log2FC	pvals	FDR
Sus_scrofa___ATAD2	18.2083	4.80232	4.4379e-74	2.38874e-69
Sus_scrofa___DIAPH3	16.8142	6.38653	1.92164e-63	5.17172e-59
Sus_scrofa___NCAPG	15.0724	3.82982	2.45901e-51	4.41196e-47
Sus_scrofa___KIF20B	13.4481	4.95575	3.15739e-41	4.24874e-37
Sus_scrofa___ANLN	12.9389	4.66425	2.71555e-38	2.92335e-34
Sus_scrofa___SPAG16	12.4936	2.31421	8.09026e-36	7.25777e-32
Sus_scrofa___RAD51B	12.4386	1.20629	1.61229e-35	1.08479e-31
Sus_scrofa___SYCP2	11.8385	1.49868	2.46967e-32	9.92799e-29
Sus_scrofa___CEP112	11.1881	1.70158	4.66071e-29	1.56792e-25
Sus_scrofa___CEP128	11.1535	2.75424	6.88332e-29	2.17942e-25
Sus_scrofa___NSD2	10.8309	2.04778	2.45658e-27	6.95935e-24
Sus_scrofa___SMC4	10.5689	2.60698	4.15205e-26	1.06423e-22
Sus_scrofa___CENPP	10.2605	1.15428	1.06127e-24	2.59654e-21
Sus_scrofa___RASAL2	9.53066	0.852234	1.56292e-21	3.2356e-18
Sus_scrofa___PLK4	9.49225	2.30197	2.26105e-21	4.50753e-18
Sus_scrofa___TOP2A	9.47775	8.01419	2.59828e-21	4.99483e-18
Sus_scrofa___CNTLN	9.45704	1.12757	3.16784e-21	5.87973e-18
Sus_scrofa___SYNE2	9.39533	1.5583	5.70388e-21	1.02339e-17
Sus_scrofa___LRCH1	9.36948	0.754461	7.28932e-21	1.26566e-17
Sus_scrofa___NCAPD3	9.30589	2.6683	1.32877e-20	2.23507e-17
Sus_scrofa___EZH2	9.09302	3.00462	9.63256e-20	1.44023e-16
Sus_scrofa___ECT2	8.94327	3.70047	3.77813e-19	5.47016e-16
Sus_scrofa___MAGI3	8.77375	0.94951	1.72819e-18	2.32554e-15
Sus_scrofa___MPHOSPH9	8.68689	1.43705	3.72505e-18	4.89036e-15
Sus_scrofa___ARL15	8.60532	0.945674	7.61021e-18	9.10283e-15
Sus_scrofa___KIF11	8.54691	6.94672	1.26423e-17	1.47712e-14
Sus_scrofa___KIF4A	8.52828	4.3415	1.48536e-17	1.66565e-14
Sus_scrofa___NCAPG2	8.51809	3.53067	1.6221e-17	1.78186e-14
Sus_scrofa___CKAP5	8.4027	1.32557	4.36314e-17	4.51635e-14
Sus_scrofa___CENPI	8.26588	2.24292	1.38672e-16	1.35712e-13
Sus_scrofa___NEURL1B	8.14993	5.29345	3.64125e-16	3.26657e-13
Sus_scrofa___TBC1D1	8.14439	0.82753	3.812e-16	3.36368e-13
Sus_scrofa___TPX2	8.13917	5.67772	3.98004e-16	3.45532e-13
Sus_scrofa___POLQ	8.11419	3.65932	4.89038e-16	4.17824e-13
Sus_scrofa___REXO5	7.99722	2.57191	1.2726e-15	1.02237e-12
Sus_scrofa___SH3PXD2A	7.94097	0.930372	2.00605e-15	1.55604e-12
Sus_scrofa___DLGAP5	7.93989	6.37966	2.02361e-15	1.55604e-12
Sus_scrofa___NDC80	7.93657	6.39441	2.07848e-15	1.57572e-12
Sus_scrofa___CDIN1	7.88061	0.895238	3.25793e-15	2.36975e-12
Sus_scrofa___RSRC1	7.87691	0.902187	3.35565e-15	2.40828e-12
Sus_scrofa___ENSSSCG00000015645	7.85155	1.2458	4.10934e-15	2.87259e-12
Sus_scrofa___FARP1	7.8265	0.92383	5.01632e-15	3.46165e-12
Sus_scrofa___HMMR	7.72394	5.2533	1.12786e-14	7.40342e-12
Sus_scrofa___PBX3	7.67139	0.991321	1.70143e-14	1.09832e-11
Sus_scrofa___NCAPD2	7.60336	1.97515	2.88542e-14	1.78518e-11
Sus_scrofa___MYBL1	7.49672	3.50933	6.54361e-14	3.82844e-11
Sus_scrofa___PIP4K2A	7.45587	1.40935	8.92777e-14	5.11219e-11
Sus_scrofa___AFAP1	7.45127	1.06701	9.24462e-14	5.23533e-11
Sus_scrofa___DNA2	7.44995	3.01904	9.33734e-14	5.23533e-11
Sus_scrofa___CIT	7.36525	4.69199	1.76815e-13	9.61338e-11
Sus_scrofa___ENSSSCG00000035544	7.33691	0.791061	2.18581e-13	1.17175e-10
Sus_scrofa___ENSSSCG00000016085	7.3348	2.25674	2.22046e-13	1.17175e-10
Sus_scrofa___IQGAP3	7.27569	4.81019	3.44648e-13	1.75009e-10
Sus_scrofa___MEIOB	7.25395	1.98277	4.04782e-13	2.03624e-10
Sus_scrofa___STRBP	7.21311	0.893914	5.46888e-13	2.70063e-10
Sus_scrofa___RTKN2	7.10623	2.00185	1.19255e-12	5.78292e-10
Sus_scrofa___ENSSSCG00000037274	7.10295	1.96154	1.22117e-12	5.86883e-10
Sus_scrofa___RUNDC3B	6.95276	1.43162	3.58208e-12	1.63398e-09
Sus_scrofa___VRK1	6.88195	2.64032	5.90406e-12	2.64827e-09
Sus_scrofa___ENSSSCG00000033649	6.81757	1.63669	9.25908e-12	4.05186e-09
Sus_scrofa___RCOR1	6.67177	0.828408	2.52743e-11	1.05175e-08
Sus_scrofa___GJC1	6.67103	2.6284	2.54017e-11	1.05175e-08
Sus_scrofa___DEK	6.64828	1.05906	2.96546e-11	1.20923e-08
Sus_scrofa___G2E3	6.63385	1.12137	3.27041e-11	1.32356e-08
Sus_scrofa___HPCAL1	6.6195	2.05417	3.6042e-11	1.44776e-08
Sus_scrofa___MCPH1	6.60243	1.54895	4.04476e-11	1.58915e-08
Sus_scrofa___CENPE	6.599	4.41048	4.13947e-11	1.59873e-08
Sus_scrofa___EML1	6.57262	0.78299	4.94376e-11	1.88725e-08
Sus_scrofa___CENPF	6.53778	7.94708	6.24381e-11	2.33389e-08
Sus_scrofa___BLM	6.53534	1.75756	6.34649e-11	2.35591e-08
Sus_scrofa___MACROD2	6.50249	0.947174	7.89987e-11	2.8731e-08
Sus_scrofa___E2F8	6.49793	5.64778	8.14325e-11	2.94174e-08
Sus_scrofa___WDR62	6.49686	2.19767	8.20157e-11	2.94305e-08
Sus_scrofa___SASS6	6.48498	2.83391	8.87464e-11	3.16349e-08
Sus_scrofa___ZDBF2	6.46121	1.26267	1.03867e-10	3.65409e-08
Sus_scrofa___ENSSSCG00000026302	6.42853	8.94759	1.28847e-10	4.4744e-08
Sus_scrofa___PRKCA	6.418	0.763693	1.38074e-10	4.73375e-08
Sus_scrofa___TANC2	6.37766	0.759448	1.79818e-10	6.08735e-08
Sus_scrofa___CCDC14	6.36972	0.950828	1.89369e-10	6.3706e-08
Sus_scrofa___GSE1	6.35269	0.788078	2.11583e-10	7.07371e-08
Sus_scrofa___SCLT1	6.34216	0.895419	2.26559e-10	7.48147e-08
Sus_scrofa___ENSSSCG00000039107	6.33613	4.39805	2.35612e-10	7.73297e-08
Sus_scrofa___TRIM37	6.32072	0.920785	2.60355e-10	8.49326e-08
Sus_scrofa___MAP1B	6.2657	0.827603	3.71145e-10	1.17513e-07
Sus_scrofa___ENSSSCG00000004782	6.21461	3.846	5.14529e-10	1.61018e-07
Sus_scrofa___MIS18BP1	6.20665	1.00933	5.41247e-10	1.684e-07
Sus_scrofa___SMC2	6.16439	2.16436	7.07574e-10	2.16397e-07
Sus_scrofa___RTTN	6.15391	1.67618	7.55961e-10	2.29889e-07
Sus_scrofa___H2AZ2	6.12864	1.47956	8.86309e-10	2.65036e-07
Sus_scrofa___LMNB1	6.10739	5.05178	1.01273e-09	2.99868e-07
Sus_scrofa___GLI3	6.1072	1.60514	1.01393e-09	2.99868e-07
Sus_scrofa___CDK5RAP2	6.09176	1.4508	1.1168e-09	3.28484e-07
Sus_scrofa___CCDC88A	6.08744	0.883878	1.14728e-09	3.33804e-07
Sus_scrofa___UACA	6.06589	0.973826	1.31226e-09	3.7579e-07
Sus_scrofa___CEP192	6.04056	1.0048	1.53577e-09	4.37377e-07
Sus_scrofa___BBS9	6.02494	1.07035	1.69177e-09	4.7182e-07
Sus_scrofa___C20orf194	6.02003	0.880353	1.7439e-09	4.83852e-07
Sus_scrofa___PRR11	5.9891	3.88876	2.11e-09	5.79454e-07
Sus_scrofa___TBC1D31	5.96882	1.04884	2.38976e-09	6.52951e-07
Sus_scrofa___KIF15	5.90475	5.42182	3.53181e-09	9.50517e-07

## Sheet: vCM2_ISG
Gene	scores	log2FC	pvals	FDR
Sus_scrofa___ITGAV	79.7889	1.10019	0	0
Sus_scrofa___LHFPL6	70.2557	1.40647	0	0
Sus_scrofa___CALD1	69.7005	0.865256	0	0
Sus_scrofa___CDC14A	66.0175	1.23664	0	0
Sus_scrofa___MAML2	65.9536	1.38826	0	0
Sus_scrofa___PDK4	64.1926	0.927908	0	0
Sus_scrofa___ITGB8	63.6065	1.23558	0	0
Sus_scrofa___NID2	63.0025	0.877993	0	0
Sus_scrofa___MAGI1	62.5926	0.968576	0	0
Sus_scrofa___LMNTD1	58.1054	0.808471	0	0
Sus_scrofa___INPP5F	57.3417	0.917825	0	0
Sus_scrofa___ROBO1	57.286	1.66363	0	0
Sus_scrofa___XPR1	56.4871	0.864572	0	0
Sus_scrofa___GLIS3	55.8267	0.787145	0	0
Sus_scrofa___KATNBL1	52.5553	0.812392	0	0
Sus_scrofa___ENSSSCG00000033786	52.4201	1.03752	0	0
Sus_scrofa___SLCO6A1	50.2918	1.45992	0	0
Sus_scrofa___FGD6	46.9615	0.868358	0	0
Sus_scrofa___STAT1	44.4131	1.02833	0	0
Sus_scrofa___VMP1	43.8124	0.822351	0	0
Sus_scrofa___CYFIP2	43.751	0.785058	0	0
Sus_scrofa___ENSSSCG00000017146	43.7454	1.74091	0	0
Sus_scrofa___CD44	43.6662	0.849634	0	0
Sus_scrofa___HERC6	43.6234	1.71213	0	0
Sus_scrofa___TANC2	42.9671	0.887033	0	0
Sus_scrofa___RTN4	42.4909	1.01586	0	0
Sus_scrofa___B2M	41.5004	1.13116	0	0
Sus_scrofa___EIF2AK2	41.4699	0.856875	0	0
Sus_scrofa___MCU	41.2558	0.805977	0	0
Sus_scrofa___OAS2	41.2274	1.85673	0	0
Sus_scrofa___LTBP1	41.2144	1.75088	0	0
Sus_scrofa___ANO6	41.1645	2.05489	0	0
Sus_scrofa___ENSSSCG00000016119	40.442	1.02566	0	0
Sus_scrofa___MTPN	40.2202	0.822489	0	0
Sus_scrofa___FBN2	39.6072	1.24915	0	0
Sus_scrofa___PHACTR2	39.4028	0.891068	0	0
Sus_scrofa___GNAQ	37.471	0.750093	2.73417e-307	1.2687e-304
Sus_scrofa___SPON1	37.421	0.937637	1.77866e-306	8.18275e-304
Sus_scrofa___MX1	37.1885	2.21767	1.04664e-302	4.73413e-300
Sus_scrofa___EPSTI1	36.8602	1.69684	2.01025e-297	8.72608e-295
Sus_scrofa___SH3PXD2B	36.5369	0.82322	2.87822e-292	1.21034e-289
Sus_scrofa___DDX60	36.3123	1.92802	1.03313e-288	4.21281e-286
Sus_scrofa___IFIT1	36.0725	2.2607	6.12506e-285	2.46035e-282
Sus_scrofa___PDGFD	35.931	0.793383	1.00142e-282	3.93448e-280
Sus_scrofa___SAT1	35.7903	0.955249	1.56321e-280	6.01008e-278
Sus_scrofa___PPP3CA	35.5519	0.759479	7.7772e-277	2.9689e-274
Sus_scrofa___IFI44	35.3228	1.34947	2.6235e-273	9.60629e-271
Sus_scrofa___ENSSSCG00000034570	35.3105	1.53339	4.04958e-273	1.47279e-270
Sus_scrofa___SETX	35.2647	1.05112	2.04549e-272	7.29143e-270
Sus_scrofa___ZNFX1	35.1581	1.76488	8.72593e-271	3.06982e-268
Sus_scrofa___LIPA	35.0749	1.4238	1.62867e-269	5.65581e-267
Sus_scrofa___XIRP2	34.8863	1.088	1.19816e-266	4.08177e-264
Sus_scrofa___RGS6	34.6581	1.42733	3.36702e-263	1.12567e-260
Sus_scrofa___IFIH1	34.4802	1.35431	1.58931e-260	5.28064e-258
Sus_scrofa___IFI44L	34.3459	1.06762	1.6226e-258	5.32548e-256
Sus_scrofa___RSAD2	34.2044	2.59355	2.07874e-256	6.74036e-254
Sus_scrofa___ACSL4	34.202	1.02243	2.25654e-256	7.2731e-254
Sus_scrofa___TRANK1	33.9278	1.76956	2.59012e-252	8.10557e-250
Sus_scrofa___NLRC5	33.8772	1.23696	1.44131e-251	4.4844e-249
Sus_scrofa___CCDC180	33.5556	1.29615	7.45677e-247	2.26762e-244
Sus_scrofa___PIP4K2A	33.3572	1.20906	5.73605e-244	1.69642e-241
Sus_scrofa___IGF2BP2	33.0845	0.793118	4.97296e-240	1.41627e-237
Sus_scrofa___ZHX3	32.7172	0.809966	8.90524e-235	2.47079e-232
Sus_scrofa___HERC5	32.5304	2.58111	3.96007e-232	1.06047e-229
Sus_scrofa___KLF6	32.0056	1.03812	9.10082e-225	2.36648e-222
Sus_scrofa___ZC3HAV1	31.8594	1.65197	9.73898e-223	2.50818e-220
Sus_scrofa___NPPB	31.1696	1.15198	2.75104e-213	6.82384e-211
Sus_scrofa___AKAP7	31.0215	1.0169	2.76508e-211	6.73454e-209
Sus_scrofa___SPIDR	30.6156	0.912155	7.59143e-206	1.77659e-203
Sus_scrofa___CD2AP	30.464	0.83496	7.8256e-204	1.80009e-201
Sus_scrofa___ISG12(A)	30.1157	1.35398	3.02175e-199	6.74891e-197
Sus_scrofa___PARP12	30.0777	1.34001	9.48984e-199	2.09344e-196
Sus_scrofa___ENSSSCG00000038506	29.9415	0.811827	5.66998e-197	1.23061e-194
Sus_scrofa___ISG15	29.6376	2.35149	4.89641e-193	1.00979e-190
Sus_scrofa___PML	29.4589	1.22068	9.6962e-191	1.97692e-188
Sus_scrofa___ADGRD1	29.2419	0.851189	5.69146e-188	1.14309e-185
Sus_scrofa___TRPS1	29.2325	1.04206	7.50299e-188	1.50132e-185
Sus_scrofa___KLF7	29.1	0.963282	3.59402e-186	7.11219e-184
Sus_scrofa___SERPINB2	28.8007	1.29403	2.10499e-182	4.06104e-180
Sus_scrofa___WWC1	28.4772	1.02973	2.2473e-178	4.18558e-176
Sus_scrofa___USP18	28.4324	1.08851	8.04401e-178	1.4828e-175
Sus_scrofa___ANXA5	27.9014	1.17869	2.56515e-171	4.45392e-169
Sus_scrofa___H3-5	27.7992	0.79692	4.43818e-170	7.63225e-168
Sus_scrofa___ARHGAP31	27.3946	0.784393	3.1793e-165	5.29811e-163
Sus_scrofa___RGL1	25.8731	0.831177	1.33891e-147	1.94253e-145
Sus_scrofa___UACA	25.8136	0.762644	6.23413e-147	9.02039e-145
Sus_scrofa___ENSSSCG00000046579	25.7302	0.81545	5.36369e-146	7.65799e-144
Sus_scrofa___PDE7B	25.144	1.44197	1.6446e-139	2.19115e-137
Sus_scrofa___ZDHHC14	24.6632	1.64479	2.65811e-134	3.32733e-132
Sus_scrofa___NXN	24.2543	0.763512	5.95158e-130	7.24774e-128
Sus_scrofa___ENSSSCG00000004578	24.1615	1.77385	5.65177e-129	6.83623e-127
Sus_scrofa___ENSSSCG00000012006	24.1136	1.94808	1.79936e-128	2.16188e-126
Sus_scrofa___MX2	24.0066	3.19961	2.37138e-127	2.81149e-125
Sus_scrofa___MID1	23.8877	1.14797	4.10765e-126	4.80649e-124
Sus_scrofa___ENSSSCG00000001229	23.8253	1.80144	1.82493e-125	2.12616e-123
Sus_scrofa___NPNT	23.5552	0.922336	1.11005e-122	1.25524e-120
Sus_scrofa___SLC12A2	23.5488	0.969556	1.29276e-122	1.45879e-120
Sus_scrofa___PTBP3	23.3085	0.752472	3.63589e-120	4.02686e-118
Sus_scrofa___FOXS1	23.189	2.45835	5.88442e-119	6.42464e-117
Sus_scrofa___GK5	22.986	1.43531	6.43748e-117	6.8479e-115

## Sheet: vCM1
Gene	scores	log2FC	pvals	FDR
Sus_scrofa___FHL2	131.04	1.14956	0	0
Sus_scrofa___ENSSSCG00000015747	91.4609	1.0911	0	0
Sus_scrofa___CORIN	88.2111	0.873958	0	0
Sus_scrofa___ENOX1	76.0577	0.81742	0	0
Sus_scrofa___ADAMTS6	65.9955	0.872589	0	0
Sus_scrofa___ITGB6	59.2321	0.808668	0	0
Sus_scrofa___RXRG	19.3422	0.755291	2.37275e-83	1.82191e-81
Sus_scrofa___CDH9	13.0558	0.951897	5.88509e-39	2.27729e-37
Sus_scrofa___FNDC1	11.139	0.957205	8.09816e-29	2.54016e-27
Sus_scrofa___NTM	9.73092	0.775628	2.22571e-22	5.83542e-21
Sus_scrofa___EFHD1	9.36398	0.779229	7.67888e-21	1.92333e-19
Sus_scrofa___DHRS7C	6.53595	0.989267	6.32077e-11	1.07733e-09
Sus_scrofa___KY	4.68852	0.751321	2.7519e-06	3.53433e-05
Sus_scrofa___CES1	3.9455	0.8822	7.96322e-05	0.000902375
Sus_scrofa___ZNF423	-2.78182	-1.19027	0.00540544	0.049481
Sus_scrofa___RAP2A	-2.78461	-1.39896	0.00535913	0.0490663
Sus_scrofa___BCL10	-2.79913	-0.789777	0.00512409	0.0470665
Sus_scrofa___ENSSSCG00000014997	-2.81666	-2.4479	0.00485254	0.0446789
Sus_scrofa___SRD5A2	-2.82123	-0.81678	0.00478401	0.0441082
Sus_scrofa___INHBA	-2.82172	-0.951271	0.00477675	0.0440565
Sus_scrofa___RPL22L1	-2.82678	-1.12885	0.00470189	0.0434032
Sus_scrofa___NCS1	-2.8385	-1.72705	0.00453264	0.0419849
Sus_scrofa___ARAP1	-2.84017	-0.954197	0.00450902	0.0417804
Sus_scrofa___CD247	-2.84585	-0.904285	0.00442924	0.0410695
Sus_scrofa___RABIF	-2.84723	-0.86052	0.00441015	0.0409136
Sus_scrofa___PRKD1	-2.84846	-0.814422	0.00439319	0.0407774
Sus_scrofa___LDHC	-2.8494	-1.00486	0.00438018	0.0406706
Sus_scrofa___APOBEC3B	-2.85019	-0.89037	0.00436928	0.0405834
Sus_scrofa___OSBPL6	-2.85993	-0.976598	0.00423734	0.0394259
Sus_scrofa___LAT2	-2.86357	-0.786668	0.00418893	0.0390363
Sus_scrofa___COL1A1	-2.87946	-4.47149	0.00398351	0.0372805
Sus_scrofa___SSBP4	-2.89105	-0.942086	0.00383951	0.0359794
Sus_scrofa___TNFRSF1A	-2.89298	-0.844006	0.003816	0.0357778
Sus_scrofa___CSDC2	-2.91448	-1.72467	0.00356285	0.0335094
Sus_scrofa___CUBN	-2.922	-0.808156	0.00347792	0.0327506
Sus_scrofa___PSMB8	-2.92352	-3.80129	0.00346097	0.0325967
Sus_scrofa___LIN7A	-2.93205	-1.44193	0.00336737	0.0318097
Sus_scrofa___JAG1	-2.93233	-0.910471	0.00336426	0.031786
Sus_scrofa___ENSSSCG00000006350	-2.95108	-0.83095	0.00316664	0.030042
Sus_scrofa___CMTM8	-2.95918	-1.4355	0.00308456	0.029308
Sus_scrofa___PNOC	-2.96669	-1.74213	0.00301021	0.028647
Sus_scrofa___ANGPTL4	-2.97632	-1.04325	0.00291732	0.0277974
Sus_scrofa___ENSSSCG00000031706	-2.97883	-0.773663	0.00289353	0.0275902
Sus_scrofa___LYN	-2.98587	-1.27142	0.00282774	0.0269821
Sus_scrofa___ARMC12	-2.98722	-0.963694	0.00281529	0.0268776
Sus_scrofa___ENC1	-2.98859	-1.2614	0.00280272	0.0267671
Sus_scrofa___CLCA1	-3.00522	-0.775791	0.00265385	0.0254129
Sus_scrofa___TTC12	-3.00526	-0.853947	0.00265356	0.0254129
Sus_scrofa___BEST2	-3.02669	-0.948761	0.00247244	0.0237646
Sus_scrofa___S100A10	-3.03255	-2.50291	0.00242495	0.0233457
Sus_scrofa___SLC16A12	-3.03788	-1.35101	0.00238249	0.0229574
Sus_scrofa___NETO2	-3.03796	-1.36658	0.00238188	0.0229559
Sus_scrofa___TMEM45A	-3.04183	-2.73362	0.00235143	0.0226825
Sus_scrofa___ENSSSCG00000027538	-3.04545	-0.831496	0.00232333	0.0224315
Sus_scrofa___STX3	-3.05061	-2.02472	0.00228379	0.0220893
Sus_scrofa___TGFB1	-3.05503	-0.787967	0.00225039	0.0217741
Sus_scrofa___CGNL1	-3.09105	-2.66909	0.00199447	0.0194201
Sus_scrofa___ENSSSCG00000031140	-3.15059	-0.821067	0.00162943	0.0160134
Sus_scrofa___C4orf46	-3.15263	-1.384	0.00161809	0.0159136
Sus_scrofa___IRF7	-3.15358	-1.70522	0.00161283	0.0158677
Sus_scrofa___ARHGDIA	-3.15867	-1.29396	0.00158493	0.0156075
Sus_scrofa___MTURN	-3.15993	-2.24694	0.00157805	0.0155425
Sus_scrofa___NTN1	-3.18206	-1.37304	0.00146234	0.0144505
Sus_scrofa___RNPEP	-3.18426	-0.917104	0.00145123	0.0143487
Sus_scrofa___PCBP1	-3.18632	-0.875659	0.00144096	0.0142575
Sus_scrofa___ABLIM3	-3.19857	-1.06984	0.00138111	0.0137082
Sus_scrofa___NOS1AP	-3.21034	-1.56154	0.00132579	0.0131858
Sus_scrofa___MANF	-3.22302	-0.799786	0.00126848	0.0126369
Sus_scrofa___APH1B	-3.2251	-1.84973	0.00125928	0.0125476
Sus_scrofa___ENSSSCG00000033089	-3.24803	-1.02723	0.00116206	0.0116349
Sus_scrofa___ACER2	-3.25826	-1.46	0.00112098	0.0112445
Sus_scrofa___MCUB	-3.26042	-1.24952	0.00111248	0.0111654
Sus_scrofa___TRIM56	-3.26191	-1.20473	0.00110663	0.011113
Sus_scrofa___NFKBIB	-3.26744	-0.753434	0.00108525	0.0109085
Sus_scrofa___FRMD3	-3.28057	-0.828122	0.00103596	0.0104345
Sus_scrofa___COL16A1	-3.29247	-1.73167	0.000993111	0.010031
Sus_scrofa___MIF	-3.29311	-1.84166	0.000990861	0.0100102
Sus_scrofa___ENSSSCG00000004945	-3.31356	-0.882634	0.00092115	0.00934272
Sus_scrofa___BICDL2	-3.33787	-2.58012	0.000844228	0.00859006
Sus_scrofa___C3orf62	-3.34273	-0.895718	0.000829575	0.00844575
Sus_scrofa___UBL5	-3.34538	-0.7606	0.000821692	0.00836867
Sus_scrofa___EPB41L4A	-3.34655	-1.51422	0.000818246	0.00833672
Sus_scrofa___SOX5	-3.35084	-1.7415	0.000805682	0.00821805
Sus_scrofa___GALNT18	-3.3561	-1.44144	0.000790495	0.00807231
Sus_scrofa___ELK4	-3.36699	-0.800118	0.000759947	0.00777512
Sus_scrofa___ENSSSCG00000017509	-3.37909	-0.786499	0.000727266	0.00745635
Sus_scrofa___PTPN13	-3.38929	-1.34742	0.000700747	0.00720642
Sus_scrofa___SYT11	-3.40171	-0.962298	0.000669668	0.00689472
Sus_scrofa___ENSSSCG00000007554	-3.41276	-0.89774	0.000643084	0.00663116
Sus_scrofa___ENSSSCG00000033720	-3.41435	-1.73782	0.000639344	0.00659639
Sus_scrofa___FAM114A1	-3.41979	-1.30155	0.00062669	0.00647327
Sus_scrofa___PLEKHO1	-3.44266	-1.61141	0.000576022	0.00597168
Sus_scrofa___NUPR1	-3.4429	-1.05128	0.000575522	0.00596764
Sus_scrofa___PER2	-3.48039	-1.0326	0.000500689	0.00521379
Sus_scrofa___CCL5	-3.50317	-3.76162	0.000459756	0.00480988
Sus_scrofa___DUSP4	-3.5051	-3.22983	0.000456442	0.00477799
Sus_scrofa___GRM3	-3.51216	-1.70299	0.000444485	0.00466372
Sus_scrofa___SHCBP1L	-3.51292	-0.799109	0.000443218	0.00465132
Sus_scrofa___PSMB9	-3.51678	-2.00645	0.000436817	0.00458862
Sus_scrofa___OSTC	-3.52013	-0.991023	0.000431333	0.0045319

## Sheet: vCM4
Gene	scores	log2FC	pvals	FDR
Sus_scrofa___COX3	59.3453	4.62969	0	0
Sus_scrofa___COX1	51.5975	4.30841	0	0
Sus_scrofa___COX2	48.2113	4.82264	0	0
Sus_scrofa___ATP6	44.662	4.98653	0	0
Sus_scrofa___MYL2	19.6139	0.751735	1.17544e-85	1.05449e-81
Sus_scrofa___CYTB	18.5186	4.06126	1.46175e-76	9.83501e-73
Sus_scrofa___TNNC1	17.1548	1.03843	5.78718e-66	3.46112e-62
Sus_scrofa___ND1	13.3657	3.71051	9.59561e-41	2.86941e-37
Sus_scrofa___ND4	13.1278	3.90238	2.28122e-39	6.46259e-36
Sus_scrofa___ND2	11.9084	4.07104	1.07075e-32	2.7445e-29
Sus_scrofa___CKM	11.7342	1.02535	8.51174e-32	2.08251e-28
Sus_scrofa___EEF1A2	11.3619	1.19687	6.47326e-30	1.39372e-26
Sus_scrofa___GAPDH	10.8168	1.26469	2.86666e-27	5.32072e-24
Sus_scrofa___ATP5ME	7.66103	0.768438	1.84447e-14	1.50425e-11
Sus_scrofa___ENO3	7.598	1.29608	3.00744e-14	2.34607e-11
Sus_scrofa___TSEN2	7.25978	1.101	3.87731e-13	2.71039e-10
Sus_scrofa___ENSSSCG00000034019	7.16601	0.850781	7.72153e-13	5.06852e-10
Sus_scrofa___ND5	7.13064	3.53566	9.99036e-13	6.32636e-10
Sus_scrofa___MYL7	6.97491	1.2642	3.06058e-12	1.851e-09
Sus_scrofa___RPLP1	6.5124	1.39906	7.39614e-11	3.4026e-08
Sus_scrofa___RPS15	6.50395	1.27115	7.82384e-11	3.53887e-08
Sus_scrofa___RPL23	6.43048	1.43419	1.27199e-10	5.56634e-08
Sus_scrofa___TPT1	6.40098	1.50906	1.54383e-10	6.59509e-08
Sus_scrofa___ENSSSCG00000007524	6.17842	0.851545	6.47446e-10	2.48925e-07
Sus_scrofa___ENSSSCG00000032599	6.02808	1.37039	1.65916e-09	6.20182e-07
Sus_scrofa___RPS8	6.01965	1.41223	1.74791e-09	6.44405e-07
Sus_scrofa___RPS2	5.846	1.62832	5.03539e-09	1.72634e-06
Sus_scrofa___CCK	5.72242	0.786999	1.05019e-08	3.36473e-06
Sus_scrofa___COX7A1	5.69492	0.909184	1.2343e-08	3.86264e-06
Sus_scrofa___ENSSSCG00000014540	5.59724	1.29983	2.17796e-08	6.51283e-06
Sus_scrofa___EEF2	5.42113	0.886731	5.92223e-08	1.68661e-05
Sus_scrofa___ENSSSCG00000034448	5.35906	1.27559	8.36571e-08	2.25146e-05
Sus_scrofa___ENSSSCG00000024974	5.1673	1.6295	2.37505e-07	6.00186e-05
Sus_scrofa___RPL37A	5.0907	1.37298	3.56738e-07	8.6886e-05
Sus_scrofa___ENSSSCG00000033262	4.99935	1.36555	5.75227e-07	0.00013239
Sus_scrofa___CHCHD10	4.99925	1.13341	5.75545e-07	0.00013239
Sus_scrofa___RPL10	4.99655	1.17993	5.83652e-07	0.000133684
Sus_scrofa___ENSSSCG00000014569	4.86984	1.28281	1.1169e-06	0.000236698
Sus_scrofa___COX6A2	4.84433	0.936817	1.27041e-06	0.000263003
Sus_scrofa___RPS27A	4.83204	1.08639	1.35144e-06	0.000276589
Sus_scrofa___RPS3	4.78275	1.36465	1.72915e-06	0.00034892
Sus_scrofa___RPL6	4.70477	1.19531	2.54158e-06	0.000485118
Sus_scrofa___RPS7	4.64821	0.887589	3.34829e-06	0.000617209
Sus_scrofa___ENSSSCG00000035904	4.58173	1.19047	4.61144e-06	0.000832937
Sus_scrofa___RPL18	4.41602	1.58223	1.00533e-05	0.00169632
Sus_scrofa___ENSSSCG00000009146	4.38405	0.978508	1.16492e-05	0.0019473
Sus_scrofa___RPS29	4.35732	1.12882	1.31667e-05	0.00215649
Sus_scrofa___RPLP0	4.25383	1.27826	2.10144e-05	0.00329774
Sus_scrofa___EEF1G	4.19688	1.32611	2.70613e-05	0.00406871
Sus_scrofa___RPL11	4.18892	0.935712	2.80284e-05	0.00420239
Sus_scrofa___ENSSSCG00000011272	4.10903	1.37734	3.97318e-05	0.00576443
Sus_scrofa___RPS12	4.08115	1.63088	4.48145e-05	0.0063646
Sus_scrofa___ENSSSCG00000029830	4.06633	1.80708	4.77589e-05	0.00674717
Sus_scrofa___RPS16	3.86122	1.41118	0.000112823	0.0145631
Sus_scrofa___RPL15	3.77295	1.39035	0.000161327	0.0200082
Sus_scrofa___ENSSSCG00000028850	3.69583	1.27993	0.000219172	0.0259849
Sus_scrofa___RPL35	3.62476	0.992442	0.000289228	0.0327059
Sus_scrofa___HSD11B1L	3.6114	1.46662	0.000304544	0.0342937
Sus_scrofa___COX5B	3.53586	0.995527	0.000406444	0.0437545
Sus_scrofa___ENSSSCG00000013906	3.49793	1.25269	0.000468888	0.049977
Sus_scrofa___HIF1A	-5.80911	-0.763396	6.28041e-09	2.11281e-06
Sus_scrofa___ERO1A	-6.51034	-0.933018	7.4983e-11	3.42037e-08
Sus_scrofa___SLCO6A1	-6.7024	-1.09025	2.05019e-11	1.07139e-08
Sus_scrofa___SYN3	-6.77078	-0.808482	1.2809e-11	6.89457e-09
Sus_scrofa___HK2	-6.89818	-1.4583	5.26713e-12	3.01605e-09
Sus_scrofa___RPP30	-15.8033	-1.10709	2.95222e-56	1.4446e-52

## Sheet: vCM3
Gene	scores	log2FC	pvals	FDR
Sus_scrofa___ACTN2	93.7538	0.847412	0	0
Sus_scrofa___NRAP	88.1096	1.07231	0	0
Sus_scrofa___ANKRD1	86.5049	1.09	0	0
Sus_scrofa___HOMER2	85.8877	1.13145	0	0
Sus_scrofa___CREB5	84.3631	1.02352	0	0
Sus_scrofa___CSRP3	82.9155	1.16664	0	0
Sus_scrofa___ROCK2	76.4363	0.901471	0	0
Sus_scrofa___MYPN	75.8772	0.959745	0	0
Sus_scrofa___EHBP1	71.7828	0.830647	0	0
Sus_scrofa___MYOT	68.9557	0.864067	0	0
Sus_scrofa___CLIC4	66.9783	0.911327	0	0
Sus_scrofa___SEMA3C	63.8706	0.821007	0	0
Sus_scrofa___FHL1	59.762	0.791764	0	0
Sus_scrofa___ENSSSCG00000010190	59.5205	0.80181	0	0
Sus_scrofa___DUSP16	58.3154	0.865327	0	0
Sus_scrofa___TMC7	57.8787	0.755175	0	0
Sus_scrofa___USP28	55.5145	0.759577	0	0
Sus_scrofa___STYXL2	53.959	1.17424	0	0
Sus_scrofa___ENAH	53.921	0.773671	0	0
Sus_scrofa___ABRA	48.9395	0.885866	0	0
Sus_scrofa___ENSSSCG00000038144	46.6485	0.809909	0	0
Sus_scrofa___FLNC	45.0889	0.790394	0	0
Sus_scrofa___KLHL41	44.4165	1.21751	0	0
Sus_scrofa___ARID5B	41.7846	0.946073	0	0
Sus_scrofa___RHOBTB1	41.6234	0.86774	0	0
Sus_scrofa___CDK1	40.9834	0.96219	0	0
Sus_scrofa___ATF3	40.9428	1.42676	0	0
Sus_scrofa___GYG1	36.7601	1.00705	8.02604e-296	4.5001e-293
Sus_scrofa___LMCD1	34.1885	1.64001	3.58604e-256	1.67845e-253
Sus_scrofa___PLS3	28.2937	0.835229	4.12992e-176	1.27027e-173
Sus_scrofa___HSPB1	25.0656	0.816541	1.18025e-138	2.83607e-136
Sus_scrofa___ASPN	25.063	0.955227	1.26038e-138	3.01517e-136
Sus_scrofa___ENSSSCG00000034015	24.7427	0.981237	3.71905e-135	8.70354e-133
Sus_scrofa___ENSSSCG00000017791	24.5393	0.868167	5.62552e-133	1.29957e-130
Sus_scrofa___CNN1	23.4	1.53307	4.27731e-121	9.10002e-119
Sus_scrofa___HOOK2	19.2593	0.826014	1.18028e-82	1.79972e-80
Sus_scrofa___CCN2	17.9397	1.06498	5.77719e-72	7.7162e-70
Sus_scrofa___KRT80	16.4117	0.976666	1.57716e-60	1.81007e-58
Sus_scrofa___NPNT	16.0155	0.957545	9.96349e-58	1.09448e-55
Sus_scrofa___CCN1	15.4916	0.817294	3.95241e-54	4.03686e-52
Sus_scrofa___ENSSSCG00000050955	15.3623	0.881475	2.93008e-53	2.94793e-51
Sus_scrofa___SERPINB2	14.4997	0.784205	1.21696e-47	1.10462e-45
Sus_scrofa___ARID5A	14.0817	1.18486	4.91927e-45	4.27072e-43
Sus_scrofa___DNAJA4	11.0706	0.76902	1.74216e-28	1.01817e-26
Sus_scrofa___HSPB6	11.0662	0.884963	1.82946e-28	1.06803e-26
Sus_scrofa___GPA33	10.071	1.00457	7.42343e-24	3.73085e-22
Sus_scrofa___PLK2	8.35624	0.937407	6.47515e-17	2.48065e-15
Sus_scrofa___IRAK4	-2.86216	-0.886928	0.0042077	0.0483732
Sus_scrofa___GRIA4	-2.86341	-0.824487	0.00419114	0.0482035
Sus_scrofa___SOX5	-2.86489	-3.28478	0.00417159	0.0480094
Sus_scrofa___MYO7A	-2.8773	-0.940431	0.00401089	0.0462887
Sus_scrofa___TGFB1	-2.87986	-1.24676	0.00397848	0.0460034
Sus_scrofa___ENSSSCG00000036109	-2.88595	-1.20619	0.00390236	0.0451717
Sus_scrofa___GALNT18	-2.89633	-2.12039	0.00377557	0.0438171
Sus_scrofa___ENSSSCG00000016737	-2.90051	-0.970396	0.0037255	0.0432827
Sus_scrofa___NRXN1	-2.90827	-1.09309	0.00363431	0.0423237
Sus_scrofa___ADAMTS17	-2.90941	-0.987464	0.00362116	0.042198
Sus_scrofa___SP110	-2.91672	-1.16694	0.00353737	0.0412931
Sus_scrofa___ANGPTL4	-2.91676	-1.66082	0.00353688	0.0412931
Sus_scrofa___LY96	-2.93556	-0.786488	0.00332948	0.0390782
Sus_scrofa___TMEM140	-2.94522	-0.871697	0.00322726	0.0379364
Sus_scrofa___FUT11	-2.96339	-0.953535	0.00304269	0.0359158
Sus_scrofa___SPAG1	-2.98609	-0.869653	0.00282569	0.0335604
Sus_scrofa___IL15	-2.99569	-2.71058	0.00273822	0.0326079
Sus_scrofa___UPP1	-3.00557	-4.45613	0.00265087	0.0316376
Sus_scrofa___PLXDC2	-3.00658	-3.60688	0.00264202	0.031546
Sus_scrofa___TSPO	-3.01905	-1.12562	0.00253572	0.0304117
Sus_scrofa___RBM38	-3.02054	-0.763569	0.00252326	0.0302801
Sus_scrofa___TNFAIP8	-3.03686	-1.00729	0.00239055	0.0288248
Sus_scrofa___UBE2L6	-3.04202	-1.5565	0.00234999	0.0283675
Sus_scrofa___ST6GALNAC3	-3.04934	-1.15033	0.00229345	0.027766
Sus_scrofa___ENSSSCG00000016548	-3.05518	-1.08464	0.00224928	0.0272618
Sus_scrofa___RAB34	-3.05567	-0.932162	0.00224555	0.0272228
Sus_scrofa___DTX3L	-3.0643	-1.02561	0.00218182	0.0265039
Sus_scrofa___POLR3H	-3.06635	-0.928601	0.00216688	0.0263462
Sus_scrofa___PHYHD1	-3.07432	-0.820852	0.00210986	0.0257518
Sus_scrofa___PIWIL4	-3.10311	-0.81771	0.00191497	0.0235331
Sus_scrofa___CPQ	-3.11583	-0.873477	0.0018343	0.0225985
Sus_scrofa___SPDYA	-3.12103	-0.883439	0.00180221	0.0222337
Sus_scrofa___ZNF667	-3.14245	-1.10673	0.00167543	0.0207457
Sus_scrofa___SNX7	-3.1445	-1.02516	0.00166372	0.0206149
Sus_scrofa___TUBB	-3.17027	-0.896304	0.00152296	0.0189932
Sus_scrofa___RAB43	-3.17774	-1.135	0.00148426	0.0185629
Sus_scrofa___TSPAN5	-3.17832	-2.76345	0.00148134	0.0185343
Sus_scrofa___XBP1	-3.18021	-0.893573	0.00147169	0.0184179
Sus_scrofa___RBMS3	-3.1828	-3.93892	0.0014586	0.0182838
Sus_scrofa___ANKRD37	-3.18849	-2.78956	0.00143016	0.017965
Sus_scrofa___CCDC82	-3.1944	-0.910703	0.0014012	0.0176259
Sus_scrofa___EDA	-3.21533	-1.26356	0.00130296	0.0164671
Sus_scrofa___MCTS1	-3.22035	-0.771451	0.00128035	0.016208
Sus_scrofa___BST2	-3.2241	-1.36234	0.0012637	0.0160273
Sus_scrofa___CPXM2	-3.25121	-0.811556	0.00114914	0.0146503
Sus_scrofa___TTF2	-3.29035	-1.12519	0.00100062	0.0128789
Sus_scrofa___ABLIM3	-3.29427	-2.04677	0.000986774	0.0127098
Sus_scrofa___MECOM	-3.30199	-3.8181	0.000960032	0.012392
Sus_scrofa___MAP3K8	-3.30291	-0.967051	0.000956859	0.012354
Sus_scrofa___RECQL	-3.31948	-0.827474	0.00090184	0.0116717
Sus_scrofa___H1-3	-3.32326	-1.23792	0.000889725	0.0115287
Sus_scrofa___DEPDC1B	-3.32559	-1.40222	0.000882331	0.0114412
Sus_scrofa___ENSSSCG00000028572	-3.33839	-0.820623	0.000842651	0.010953

## Sheet: vCM5
Gene	scores	log2FC	pvals	FDR
Sus_scrofa___RGS6	31.4701	3.90479	2.23216e-217	1.20148e-212
Sus_scrofa___LMNTD1	23.4928	1.6884	4.82679e-122	1.29904e-117
Sus_scrofa___GRAMD1B	20.3638	1.59096	3.50331e-92	6.28563e-88
Sus_scrofa___MID1	18.4731	2.98246	3.39686e-76	4.57098e-72
Sus_scrofa___CADM1	18.1136	1.69468	2.49077e-73	2.68136e-69
Sus_scrofa___PDGFD	16.9633	1.74229	1.53526e-64	1.37728e-60
Sus_scrofa___FAM155A	16.1703	5.07593	8.17347e-59	6.28493e-55
Sus_scrofa___AGBL4	15.6984	1.64289	1.54986e-55	1.04278e-51
Sus_scrofa___THSD7A	15.0483	0.883398	3.54409e-51	1.90764e-47
Sus_scrofa___FGD6	14.9158	1.42534	2.60152e-50	1.273e-46
Sus_scrofa___GRIA4	14.473	4.24523	1.79515e-47	7.43277e-44
Sus_scrofa___EXT1	14.3793	0.766607	6.98461e-47	2.68538e-43
Sus_scrofa___CYFIP2	14.2463	1.28195	4.72523e-46	1.6956e-42
Sus_scrofa___FRAS1	14.2065	3.10522	8.35161e-46	2.80959e-42
Sus_scrofa___MTUS1	13.8605	0.906877	1.09961e-43	3.48163e-40
Sus_scrofa___RNF180	13.6224	0.86659	2.94862e-42	8.35327e-39
Sus_scrofa___CCSER1	13.5161	2.91178	1.25721e-41	3.38352e-38
Sus_scrofa___NLGN1	13.4342	2.76193	3.81204e-41	9.77079e-38
Sus_scrofa___MAGI1	13.375	1.00246	8.46228e-41	1.98039e-37
Sus_scrofa___EPHA4	12.4329	4.03361	1.73328e-35	3.45539e-32
Sus_scrofa___PDE7B	12.0426	2.90461	2.12044e-33	3.68176e-30
Sus_scrofa___LHFPL6	11.9837	1.09621	4.32814e-33	7.05959e-30
Sus_scrofa___TANC2	11.7363	1.14659	8.30804e-32	1.24219e-28
Sus_scrofa___CNTN4	11.5302	4.63006	9.29045e-31	1.35153e-27
Sus_scrofa___PSD3	11.2928	0.971294	1.4241e-29	1.96547e-26
Sus_scrofa___FBN2	11.1339	1.62124	8.58094e-29	1.12653e-25
Sus_scrofa___MAML2	10.9725	1.0779	5.1817e-28	6.48628e-25
Sus_scrofa___ABTB2	10.7371	0.777269	6.81635e-27	7.64368e-24
Sus_scrofa___FRMD4A	10.5159	2.02876	7.29812e-26	8.01691e-23
Sus_scrofa___SLIT3	10.4813	2.08871	1.05328e-25	1.13388e-22
Sus_scrofa___FRYL	10.2872	0.958217	8.04796e-25	8.33057e-22
Sus_scrofa___RASSF3	10.1828	0.839447	2.36681e-24	2.27492e-21
Sus_scrofa___PARM1	10.1587	0.751559	3.032e-24	2.8138e-21
Sus_scrofa___KCNT2	10.1523	0.809149	3.23629e-24	2.95248e-21
Sus_scrofa___MDGA2	10.0351	4.57308	1.06825e-23	9.12695e-21
Sus_scrofa___CACNA2D3	10.0139	2.13158	1.32398e-23	1.11351e-20
Sus_scrofa___SPON1	9.96227	1.33033	2.22924e-23	1.81804e-20
Sus_scrofa___BICD1	9.93136	1.66828	3.04074e-23	2.44285e-20
Sus_scrofa___CEP126	9.87781	0.875664	5.19537e-23	4.11244e-20
Sus_scrofa___CDC14A	9.78401	0.794218	1.31879e-22	1.02877e-19
Sus_scrofa___SASH1	9.74	1.33019	2.03564e-22	1.54324e-19
Sus_scrofa___OXR1	9.39547	1.0945	5.69648e-21	3.83273e-18
Sus_scrofa___CTNND2	9.24875	2.8679	2.27135e-20	1.43833e-17
Sus_scrofa___ROBO1	9.09415	1.19227	9.53327e-20	5.89814e-17
Sus_scrofa___XYLT1	9.0389	0.952119	1.5825e-19	9.67953e-17
Sus_scrofa___CNTN3	8.82718	2.63498	1.07351e-18	6.42031e-16
Sus_scrofa___SIK2	8.53027	2.51235	1.46009e-17	7.93848e-15
Sus_scrofa___LTBP1	8.36603	1.68503	5.95948e-17	3.14485e-14
Sus_scrofa___SH3PXD2A	8.291	0.875192	1.12298e-16	5.81208e-14
Sus_scrofa___TBC1D1	8.24596	0.790969	1.63841e-16	8.31973e-14
Sus_scrofa___NECTIN3	8.21331	1.42562	2.15173e-16	1.08242e-13
Sus_scrofa___RNF144B	8.07908	0.935737	6.52561e-16	3.08112e-13
Sus_scrofa___CDH18	7.86368	1.4613	3.73003e-15	1.70146e-12
Sus_scrofa___MAGI2	7.83068	1.87954	4.85233e-15	2.1948e-12
Sus_scrofa___PDE1C	7.81321	1.49202	5.57489e-15	2.47995e-12
Sus_scrofa___NRCAM	7.64474	1.52289	2.09364e-14	8.8041e-12
Sus_scrofa___ENSSSCG00000005518	7.62738	0.82224	2.39567e-14	9.99608e-12
Sus_scrofa___PLCB1	7.61536	3.94341	2.62965e-14	1.0888e-11
Sus_scrofa___ANO6	7.55686	1.48668	4.12929e-14	1.64639e-11
Sus_scrofa___CNTN5	7.50608	0.86564	6.09221e-14	2.39357e-11
Sus_scrofa___SLC6A6	7.41033	2.05741	1.25985e-13	4.70921e-11
Sus_scrofa___ATRNL1	7.34977	3.3165	1.98554e-13	7.32011e-11
Sus_scrofa___TP63	7.34108	1.64918	2.11874e-13	7.75804e-11
Sus_scrofa___WWC1	7.21347	1.22088	5.45432e-13	1.91885e-10
Sus_scrofa___EVA1C	6.99317	0.954177	2.68739e-12	8.87434e-10
Sus_scrofa___PLEKHG1	6.93218	4.3412	4.14398e-12	1.3277e-09
Sus_scrofa___DGKI	6.92222	1.02609	4.44629e-12	1.4078e-09
Sus_scrofa___RERG	6.86192	3.95523	6.79415e-12	2.06611e-09
Sus_scrofa___GNAQ	6.82122	0.758097	9.02724e-12	2.71453e-09
Sus_scrofa___FUT8	6.66445	1.19424	2.65663e-11	7.5261e-09
Sus_scrofa___ADGRD1	6.57738	1.04174	4.78825e-11	1.32852e-08
Sus_scrofa___DKK3	6.48939	1.90018	8.61828e-11	2.33109e-08
Sus_scrofa___NXN	6.44825	1.11192	1.13152e-10	3.04525e-08
Sus_scrofa___LRRC9	6.41803	0.883775	1.38046e-10	3.69675e-08
Sus_scrofa___ETV1	6.3736	2.94167	1.84644e-10	4.82458e-08
Sus_scrofa___DIO2	6.25491	3.65134	3.97739e-10	1.01463e-07
Sus_scrofa___STAC2	6.23944	0.952466	4.39143e-10	1.10455e-07
Sus_scrofa___PLCXD3	6.1272	2.06698	8.94382e-10	2.16851e-07
Sus_scrofa___KCND2	6.04362	1.05801	1.50693e-09	3.55755e-07
Sus_scrofa___ARHGAP31	5.93875	0.941614	2.87209e-09	6.54064e-07
Sus_scrofa___TSPAN5	5.82268	3.22862	5.79109e-09	1.26199e-06
Sus_scrofa___ARHGEF2	5.75984	0.990551	8.41948e-09	1.80553e-06
Sus_scrofa___SLC9A9	5.75277	0.89876	8.77933e-09	1.87522e-06
Sus_scrofa___UACA	5.74704	0.954067	9.08199e-09	1.9322e-06
Sus_scrofa___NTM	5.73651	1.5088	9.66448e-09	2.04803e-06
Sus_scrofa___SPAG16	5.58462	0.963172	2.34216e-08	4.75733e-06
Sus_scrofa___ENSSSCG00000013880	5.46826	2.26024	4.54479e-08	8.89555e-06
Sus_scrofa___CYB5A	5.45322	0.858476	4.94659e-08	9.6121e-06
Sus_scrofa___DCBLD2	5.32591	1.36642	1.00451e-07	1.85803e-05
Sus_scrofa___CPNE5	5.2899	1.37885	1.22386e-07	2.24831e-05
Sus_scrofa___ERC2	5.20986	2.30466	1.88986e-07	3.39078e-05
Sus_scrofa___SLC4A7	5.18818	1.69124	2.12362e-07	3.75432e-05
Sus_scrofa___ADAMTS3	4.93638	0.945022	7.95851e-07	0.000131403
Sus_scrofa___OSBPL6	4.82365	3.15849	1.40954e-06	0.000225133
Sus_scrofa___SPATA1	4.70136	0.890417	2.58439e-06	0.000388568
Sus_scrofa___SLIT2	4.67982	1.41342	2.87122e-06	0.000426923
Sus_scrofa___NIPAL2	4.62123	2.87596	3.81479e-06	0.000556464
Sus_scrofa___SH3D19	4.59579	1.56227	4.31111e-06	0.000615517
Sus_scrofa___ADAM19	4.56044	1.00355	5.10468e-06	0.000717401
Sus_scrofa___SH3RF2	4.50577	1.43912	6.61333e-06	0.000908085
