# Supplementary material for: Integrated Molecular Profiling of Preclinical and Clinical Cardiac Xenotransplants
Source: Research Square preprint supplement (doi:10.21203/rs.3.rs-8406985/v1), 2026-02-04
Supplement: Supplementary file 31 [file be2f5277b7e8f4f8e355ced5.xlsx]

## Sheet: pathway scores
Condition_subsets	Fatty_Acid_Metabolism_score	Ketone_Metabolism_score	Lactate_Metabolism_score	Glycolysis_Glucose_Oxidation_score	Carbohydrate_Metabolism_score	Amino_Acid_Metabolism_score	TCA_Cycle_Mitochondrial_Function_score	Metabolic_Dysfunction_score
Control	0.101692	0.121764	-0.0775719	-0.00739576	0.0228988	0.0064473	-0.0262109	-0.0274227
3-month protocol	0.0927067	0.0978489	-0.0834392	-0.0139945	-0.00441415	-0.0124608	-0.0263259	-0.0348268
6-month protocol	0.0623597	0.06791	-0.0147314	0.0808351	0.0271429	-0.00840123	-0.0413836	-0.00385161
Prematurely terminated	0.00501295	0.0697107	-0.0667771	0.000914999	-0.00390675	-0.0217757	-0.0263179	-0.0267589
PCMV/PRV	0.0522519	0.0560096	-0.0594909	0.00531096	0.0879223	-0.0188849	-0.0333215	0.0688835
Rejection	0.0342	0.0391922	-0.0575152	0.00246343	0.0310808	-0.00469422	-0.0417419	0.0035931

## Sheet: Pearson R
Condition_subsets	Control	3-month protocol	6-month protocol	Prematurely terminated	PCMV/PRV	Rejection
Control	1	0.99135	0.68429	0.892494	0.605787	0.857995
3-month protocol	0.99135	1	0.680702	0.872726	0.562589	0.817106
6-month protocol	0.68429	0.680702	1	0.721417	0.511146	0.744618
Prematurely terminated	0.892494	0.872726	0.721417	1	0.588569	0.807006
PCMV/PRV	0.605787	0.562589	0.511146	0.588569	1	0.882487
Rejection	0.857995	0.817106	0.744618	0.807006	0.882487	1
