# Supplementary material for: Integrated Molecular Profiling of Preclinical and Clinical Cardiac Xenotransplants
Source: Research Square preprint supplement (doi:10.21203/rs.3.rs-8406985/v1), 2026-02-04
Supplement: Supplementary file 32 [file bf39710df1088f5c77dfb2f5.xlsx]

## Sheet: ANGPT
pathway_name	ligand	receptor	source	target	prob	pval	group
ANGPT	ANGPT2	ITGA5_ITGB1	Endocardial/lymphatic EC	CM	9.6446e-06	0	Rejection
ANGPT	ANGPT2	ITGA5_ITGB1	Endocardial/lymphatic EC	CM	8.68048e-06	0	3-month protocol
ANGPT	ANGPT2	ITGA5_ITGB1	Endocardial/lymphatic EC	Endocardial/lymphatic EC	1.91699e-05	0	Rejection
ANGPT	ANGPT2	ITGA5_ITGB1	Endothelial cells (baboon)	CM	4.82232e-06	0	Rejection
ANGPT	ANGPT2	ITGA5_ITGB1	Endothelial cells (baboon)	Endocardial/lymphatic EC	9.58506e-06	0	Rejection
ANGPT	ANGPT2	ITGA5_ITGB1	Vascular EC	CM	4.82232e-06	0	Rejection
ANGPT	ANGPT2	ITGA5_ITGB1	Vascular EC	Endocardial/lymphatic EC	9.58506e-06	0	Rejection
ANGPT	ANGPT2	TEK	Endocardial/lymphatic EC	Endocardial/lymphatic EC	9.6446e-06	0	Rejection
ANGPT	ANGPT2	TEK	Endocardial/lymphatic EC	Endocardial/lymphatic EC	8.68048e-06	0	3-month protocol
ANGPT	ANGPT2	TEK	Endocardial/lymphatic EC	Endothelial cells (baboon)	2.6041e-05	0	3-month protocol
ANGPT	ANGPT2	TEK	Endocardial/lymphatic EC	Vascular EC	9.6446e-06	0	Rejection
ANGPT	ANGPT2	TEK	Endocardial/lymphatic EC	Vascular EC	8.68048e-06	0	3-month protocol
ANGPT	ANGPT2	TEK	Endothelial cells (baboon)	Endocardial/lymphatic EC	4.82232e-06	0	Rejection
ANGPT	ANGPT2	TEK	Endothelial cells (baboon)	Vascular EC	4.82232e-06	0	Rejection
ANGPT	ANGPT2	TEK	Vascular EC	Endocardial/lymphatic EC	4.82232e-06	0	Rejection
ANGPT	ANGPT2	TEK	Vascular EC	Vascular EC	4.82232e-06	0	Rejection

## Sheet: APP
pathway_name	ligand	receptor	source	target	prob	pval	group
APP	APP	CD74	CM	Endothelial cells (baboon)	1.9289e-05	0	Rejection
APP	APP	CD74	CM	Endothelial cells (baboon)	1.73608e-05	0	3-month protocol
APP	APP	CD74	CM	Myeloids (baboon)	7.71516e-05	0	Rejection
APP	APP	CD74	CM	Myeloids (baboon)	0.00013887	0	3-month protocol
APP	APP	CD74	Endocardial/lymphatic EC	Endothelial cells (baboon)	4.33992e-05	0	Rejection
APP	APP	CD74	Endocardial/lymphatic EC	Endothelial cells (baboon)	1.73608e-05	0	3-month protocol
APP	APP	CD74	Endocardial/lymphatic EC	Myeloids (baboon)	0.000173574	0	Rejection
APP	APP	CD74	Endocardial/lymphatic EC	Myeloids (baboon)	0.00013887	0	3-month protocol
APP	APP	CD74	Endothelial cells (baboon)	Endothelial cells (baboon)	7.23346e-06	0	Rejection
APP	APP	CD74	Endothelial cells (baboon)	Endothelial cells (baboon)	2.17013e-06	0.01	3-month protocol
APP	APP	CD74	Endothelial cells (baboon)	Myeloids (baboon)	2.89332e-05	0	Rejection
APP	APP	CD74	Endothelial cells (baboon)	Myeloids (baboon)	1.73608e-05	0	3-month protocol
APP	APP	CD74	Fibroblasts	Endothelial cells (baboon)	4.82232e-06	0.02	Rejection
APP	APP	CD74	Fibroblasts	Endothelial cells (baboon)	4.34026e-06	0.01	3-month protocol
APP	APP	CD74	Fibroblasts	Myeloids (baboon)	1.9289e-05	0	Rejection
APP	APP	CD74	Fibroblasts	Myeloids (baboon)	3.4721e-05	0	3-month protocol
APP	APP	CD74	Mural cells	Endothelial cells (baboon)	4.82232e-06	0.02	Rejection
APP	APP	CD74	Mural cells	Endothelial cells (baboon)	4.34026e-06	0.01	3-month protocol
APP	APP	CD74	Mural cells	Myeloids (baboon)	1.9289e-05	0	Rejection
APP	APP	CD74	Mural cells	Myeloids (baboon)	3.4721e-05	0	3-month protocol
APP	APP	CD74	Neuronal cells	Endothelial cells (baboon)	1.9289e-05	0	Rejection
APP	APP	CD74	Neuronal cells	Endothelial cells (baboon)	4.34026e-06	0.01	3-month protocol
APP	APP	CD74	Neuronal cells	Myeloids (baboon)	7.71516e-05	0	Rejection
APP	APP	CD74	Neuronal cells	Myeloids (baboon)	3.4721e-05	0	3-month protocol
APP	APP	CD74	Resident Immune	Endothelial cells (baboon)	0.000109696	0	Rejection
APP	APP	CD74	Resident Immune	Endothelial cells (baboon)	4.34026e-06	0.01	3-month protocol
APP	APP	CD74	Resident Immune	Myeloids (baboon)	0.000438641	0	Rejection
APP	APP	CD74	Resident Immune	Myeloids (baboon)	3.4721e-05	0	3-month protocol
APP	APP	CD74	Vascular EC	Endothelial cells (baboon)	4.33992e-05	0	Rejection
APP	APP	CD74	Vascular EC	Endothelial cells (baboon)	2.17009e-05	0	3-month protocol
APP	APP	CD74	Vascular EC	Myeloids (baboon)	0.000173574	0	Rejection
APP	APP	CD74	Vascular EC	Myeloids (baboon)	0.000173581	0	3-month protocol

## Sheet: BMP
pathway_name	ligand	receptor	source	target	prob	pval	group
BMP	BMP6	ACVR1_ACVR2A	Endocardial/lymphatic EC	CM	4.33992e-05	0	Rejection
BMP	BMP6	ACVR1_ACVR2A	Endocardial/lymphatic EC	CM	3.4721e-05	0	3-month protocol
BMP	BMP6	ACVR1_ACVR2A	Endocardial/lymphatic EC	Fibroblasts	4.33992e-05	0	Rejection
BMP	BMP6	ACVR1_ACVR2A	Fibroblasts	CM	4.82232e-06	0	Rejection
BMP	BMP6	ACVR1_ACVR2A	Fibroblasts	CM	8.68048e-06	0	3-month protocol
BMP	BMP6	ACVR1_ACVR2A	Fibroblasts	Fibroblasts	4.82232e-06	0	Rejection
BMP	BMP6	ACVR1_ACVR2A	Vascular EC	CM	1.9289e-05	0	Rejection
BMP	BMP6	ACVR1_ACVR2A	Vascular EC	CM	8.68048e-06	0	3-month protocol
BMP	BMP6	ACVR1_ACVR2A	Vascular EC	Fibroblasts	1.9289e-05	0	Rejection
BMP	BMP6	ACVR1_BMPR2	Endocardial/lymphatic EC	CM	8.67947e-05	0	Rejection
BMP	BMP6	ACVR1_BMPR2	Endocardial/lymphatic EC	CM	3.4721e-05	0	3-month protocol
BMP	BMP6	ACVR1_BMPR2	Endocardial/lymphatic EC	Fibroblasts	8.67947e-05	0	Rejection
BMP	BMP6	ACVR1_BMPR2	Endocardial/lymphatic EC	Neuronal cells	4.33992e-05	0	Rejection
BMP	BMP6	ACVR1_BMPR2	Fibroblasts	CM	9.6446e-06	0	Rejection
BMP	BMP6	ACVR1_BMPR2	Fibroblasts	CM	8.68048e-06	0	3-month protocol
BMP	BMP6	ACVR1_BMPR2	Fibroblasts	Fibroblasts	9.6446e-06	0	Rejection
BMP	BMP6	ACVR1_BMPR2	Fibroblasts	Neuronal cells	4.82232e-06	0	Rejection
BMP	BMP6	ACVR1_BMPR2	Vascular EC	CM	3.85773e-05	0	Rejection
BMP	BMP6	ACVR1_BMPR2	Vascular EC	CM	8.68048e-06	0	3-month protocol
BMP	BMP6	ACVR1_BMPR2	Vascular EC	Fibroblasts	3.85773e-05	0	Rejection
BMP	BMP6	ACVR1_BMPR2	Vascular EC	Neuronal cells	1.9289e-05	0	Rejection
BMP	BMP6	BMPR1A_ACVR2A	Endocardial/lymphatic EC	CM	8.67947e-05	0	Rejection
BMP	BMP6	BMPR1A_ACVR2A	Endocardial/lymphatic EC	CM	6.94396e-05	0	3-month protocol
BMP	BMP6	BMPR1A_ACVR2A	Endocardial/lymphatic EC	Fibroblasts	7.51673e-05	0	Rejection
BMP	BMP6	BMPR1A_ACVR2A	Endocardial/lymphatic EC	Fibroblasts	3.4721e-05	0	3-month protocol
BMP	BMP6	BMPR1A_ACVR2A	Fibroblasts	CM	9.6446e-06	0	Rejection
BMP	BMP6	BMPR1A_ACVR2A	Fibroblasts	CM	1.73608e-05	0	3-month protocol
BMP	BMP6	BMPR1A_ACVR2A	Fibroblasts	Fibroblasts	8.35248e-06	0	Rejection
BMP	BMP6	BMPR1A_ACVR2A	Fibroblasts	Fibroblasts	8.68048e-06	0	3-month protocol
BMP	BMP6	BMPR1A_ACVR2A	Vascular EC	CM	3.85773e-05	0	Rejection
BMP	BMP6	BMPR1A_ACVR2A	Vascular EC	CM	1.73608e-05	0	3-month protocol
BMP	BMP6	BMPR1A_ACVR2A	Vascular EC	Fibroblasts	3.34091e-05	0	Rejection
BMP	BMP6	BMPR1A_ACVR2A	Vascular EC	Fibroblasts	8.68048e-06	0	3-month protocol
BMP	BMP6	BMPR1A_BMPR2	Endocardial/lymphatic EC	CM	0.000173574	0	Rejection
BMP	BMP6	BMPR1A_BMPR2	Endocardial/lymphatic EC	CM	6.94396e-05	0	3-month protocol
BMP	BMP6	BMPR1A_BMPR2	Endocardial/lymphatic EC	Fibroblasts	0.000150323	0	Rejection
BMP	BMP6	BMPR1A_BMPR2	Endocardial/lymphatic EC	Fibroblasts	3.4721e-05	0	3-month protocol
BMP	BMP6	BMPR1A_BMPR2	Endocardial/lymphatic EC	Mural cells	4.33992e-05	0	Rejection
BMP	BMP6	BMPR1A_BMPR2	Endocardial/lymphatic EC	Neuronal cells	4.33992e-05	0	Rejection
BMP	BMP6	BMPR1A_BMPR2	Fibroblasts	CM	1.9289e-05	0	Rejection
BMP	BMP6	BMPR1A_BMPR2	Fibroblasts	CM	1.73608e-05	0	3-month protocol
BMP	BMP6	BMPR1A_BMPR2	Fibroblasts	Fibroblasts	1.67048e-05	0	Rejection
BMP	BMP6	BMPR1A_BMPR2	Fibroblasts	Fibroblasts	8.68048e-06	0	3-month protocol
BMP	BMP6	BMPR1A_BMPR2	Fibroblasts	Mural cells	4.82232e-06	0	Rejection
BMP	BMP6	BMPR1A_BMPR2	Fibroblasts	Neuronal cells	4.82232e-06	0	Rejection
BMP	BMP6	BMPR1A_BMPR2	Vascular EC	CM	7.71516e-05	0	Rejection
BMP	BMP6	BMPR1A_BMPR2	Vascular EC	CM	1.73608e-05	0	3-month protocol
BMP	BMP6	BMPR1A_BMPR2	Vascular EC	Fibroblasts	6.68159e-05	0	Rejection
BMP	BMP6	BMPR1A_BMPR2	Vascular EC	Fibroblasts	8.68048e-06	0	3-month protocol
BMP	BMP6	BMPR1A_BMPR2	Vascular EC	Mural cells	1.9289e-05	0	Rejection
BMP	BMP6	BMPR1A_BMPR2	Vascular EC	Neuronal cells	1.9289e-05	0	Rejection

## Sheet: CADM
pathway_name	ligand	receptor	source	target	prob	pval	group
CADM	CADM1	CADM1	Mast cells (baboon)	Neuronal cells	2.17013e-06	0	3-month protocol
CADM	CADM1	CADM1	Mast cells (baboon)	Resident Immune	2.17013e-06	0.01	3-month protocol
CADM	CADM1	CADM1	Neuronal cells	Mast cells (baboon)	2.17013e-06	0	3-month protocol
CADM	CADM1	CADM1	Neuronal cells	Neuronal cells	7.71516e-05	0	Rejection
CADM	CADM1	CADM1	Neuronal cells	Neuronal cells	8.68048e-06	0	3-month protocol
CADM	CADM1	CADM1	Neuronal cells	Resident Immune	9.16162e-05	0	Rejection
CADM	CADM1	CADM1	Neuronal cells	Resident Immune	8.68048e-06	0	3-month protocol
CADM	CADM1	CADM1	Resident Immune	Mast cells (baboon)	2.17013e-06	0.01	3-month protocol
CADM	CADM1	CADM1	Resident Immune	Neuronal cells	9.16162e-05	0	Rejection
CADM	CADM1	CADM1	Resident Immune	Neuronal cells	8.68048e-06	0	3-month protocol
CADM	CADM1	CADM1	Resident Immune	Resident Immune	0.000108792	0	Rejection
CADM	CADM1	CADM1	Resident Immune	Resident Immune	8.68048e-06	0	3-month protocol

## Sheet: CCL
pathway_name	ligand	receptor	source	target	prob	pval	group
CCL	CCL14	ACKR2	Resident Immune	Endocardial/lymphatic EC	4.82232e-06	0	Rejection
CCL	CCL14	ACKR2	Resident Immune	Fibroblasts	4.82232e-06	0	Rejection
CCL	CCL2	ACKR2	Fibroblasts	Endocardial/lymphatic EC	4.82232e-06	0	Rejection
CCL	CCL2	ACKR2	Fibroblasts	Fibroblasts	4.82232e-06	0	Rejection

## Sheet: CD99
pathway_name	ligand	receptor	source	target	prob	pval	group
CD99	CD99	CD99	Endothelial cells (baboon)	Endothelial cells (baboon)	2.17013e-06	0	3-month protocol

## Sheet: CD45
pathway_name	ligand	receptor	source	target	prob	pval	group
CD45	PTPRC	MRC1	Endothelial cells (baboon)	Endocardial/lymphatic EC	8.43839e-05	0	Rejection
CD45	PTPRC	MRC1	Endothelial cells (baboon)	Endocardial/lymphatic EC	4.34026e-06	0	3-month protocol
CD45	PTPRC	MRC1	Endothelial cells (baboon)	Myeloids (baboon)	1.68779e-05	0	Rejection
CD45	PTPRC	MRC1	Endothelial cells (baboon)	Myeloids (baboon)	8.68048e-06	0	3-month protocol
CD45	PTPRC	MRC1	Endothelial cells (baboon)	Resident Immune	0.000303715	0	Rejection
CD45	PTPRC	MRC1	Endothelial cells (baboon)	Resident Immune	2.6041e-05	0	3-month protocol
CD45	PTPRC	MRC1	Lymphoids (baboon)	Endocardial/lymphatic EC	0.000192857	0	Rejection
CD45	PTPRC	MRC1	Lymphoids (baboon)	Endocardial/lymphatic EC	6.94396e-05	0	3-month protocol
CD45	PTPRC	MRC1	Lymphoids (baboon)	Myeloids (baboon)	3.85773e-05	0	Rejection
CD45	PTPRC	MRC1	Lymphoids (baboon)	Myeloids (baboon)	0.00013887	0	3-month protocol
CD45	PTPRC	MRC1	Lymphoids (baboon)	Resident Immune	0.000693936	0	Rejection
CD45	PTPRC	MRC1	Lymphoids (baboon)	Resident Immune	0.000416493	0	3-month protocol
CD45	PTPRC	MRC1	Mast cells (baboon)	Endocardial/lymphatic EC	2.41111e-05	0	Rejection
CD45	PTPRC	MRC1	Mast cells (baboon)	Endocardial/lymphatic EC	1.73608e-05	0	3-month protocol
CD45	PTPRC	MRC1	Mast cells (baboon)	Myeloids (baboon)	4.82232e-06	0	Rejection
CD45	PTPRC	MRC1	Mast cells (baboon)	Myeloids (baboon)	3.4721e-05	0	3-month protocol
CD45	PTPRC	MRC1	Mast cells (baboon)	Resident Immune	8.67947e-05	0	Rejection
CD45	PTPRC	MRC1	Mast cells (baboon)	Resident Immune	0.000104156	0	3-month protocol
CD45	PTPRC	MRC1	Myeloids (baboon)	Endocardial/lymphatic EC	9.64376e-05	0	Rejection
CD45	PTPRC	MRC1	Myeloids (baboon)	Endocardial/lymphatic EC	2.6041e-05	0	3-month protocol
CD45	PTPRC	MRC1	Myeloids (baboon)	Myeloids (baboon)	1.9289e-05	0	Rejection
CD45	PTPRC	MRC1	Myeloids (baboon)	Myeloids (baboon)	5.20806e-05	0	3-month protocol
CD45	PTPRC	MRC1	Myeloids (baboon)	Resident Immune	0.000347088	0	Rejection
CD45	PTPRC	MRC1	Myeloids (baboon)	Resident Immune	0.000156226	0	3-month protocol
CD45	PTPRC	MRC1	Resident Immune	Endocardial/lymphatic EC	9.64376e-05	0	Rejection
CD45	PTPRC	MRC1	Resident Immune	Endocardial/lymphatic EC	3.4721e-05	0	3-month protocol
CD45	PTPRC	MRC1	Resident Immune	Myeloids (baboon)	1.9289e-05	0	Rejection
CD45	PTPRC	MRC1	Resident Immune	Myeloids (baboon)	6.94396e-05	0	3-month protocol
CD45	PTPRC	MRC1	Resident Immune	Resident Immune	0.000347088	0	Rejection
CD45	PTPRC	MRC1	Resident Immune	Resident Immune	0.00020829	0	3-month protocol
CD45	PTPRC	MRC1	Vascular EC	Endocardial/lymphatic EC	2.41111e-05	0	Rejection
CD45	PTPRC	MRC1	Vascular EC	Myeloids (baboon)	4.82232e-06	0	Rejection
CD45	PTPRC	MRC1	Vascular EC	Resident Immune	8.67947e-05	0	Rejection

## Sheet: CDH
pathway_name	ligand	receptor	source	target	prob	pval	group
CDH	CDH2	CDH2	CM	CM	0.00587268	0	Rejection
CDH	CDH2	CDH2	CM	CM	0.0117441	0	3-month protocol

## Sheet: CDH5
pathway_name	ligand	receptor	source	target	prob	pval	group
CDH5	CDH5	CDH5	Endocardial/lymphatic EC	Endocardial/lymphatic EC	4.82232e-06	0	Rejection
CDH5	CDH5	CDH5	Endocardial/lymphatic EC	Vascular EC	4.82232e-06	0	Rejection
CDH5	CDH5	CDH5	Vascular EC	Endocardial/lymphatic EC	4.82232e-06	0	Rejection
CDH5	CDH5	CDH5	Vascular EC	Vascular EC	4.82232e-06	0	Rejection
CDH5	CDH5	CDH5	Vascular EC	Vascular EC	8.68048e-06	0	3-month protocol

## Sheet: COLLAGEN
pathway_name	ligand	receptor	source	target	prob	pval	group
COLLAGEN	COL1A1	CD44	Fibroblasts	CM	1.9289e-05	0	Rejection
COLLAGEN	COL1A1	CD44	Fibroblasts	Endothelial cells (baboon)	1.9289e-05	0	Rejection
COLLAGEN	COL1A1	CD44	Fibroblasts	Lymphoids (baboon)	1.9289e-05	0	Rejection
COLLAGEN	COL1A1	CD44	Fibroblasts	Lymphoids (baboon)	8.68048e-06	0	3-month protocol
COLLAGEN	COL1A1	CD44	Fibroblasts	Mast cells (baboon)	1.9289e-05	0	Rejection
COLLAGEN	COL1A1	CD44	Fibroblasts	Mast cells (baboon)	2.17013e-06	0	3-month protocol
COLLAGEN	COL1A1	CD44	Fibroblasts	Myeloids (baboon)	1.9289e-05	0	Rejection
COLLAGEN	COL1A1	CD44	Fibroblasts	Myeloids (baboon)	8.68048e-06	0	3-month protocol
COLLAGEN	COL1A1	CD44	Fibroblasts	Neuronal cells	9.6446e-06	0	Rejection
COLLAGEN	COL1A1	CD44	Fibroblasts	Resident Immune	1.9289e-05	0	Rejection
COLLAGEN	COL1A1	ITGA11_ITGB1	Fibroblasts	Fibroblasts	3.85773e-05	0	Rejection
COLLAGEN	COL1A1	ITGA1_ITGB1	Fibroblasts	Endocardial/lymphatic EC	8.62573e-05	0	Rejection
COLLAGEN	COL1A1	ITGA1_ITGB1	Fibroblasts	Endocardial/lymphatic EC	1.73608e-05	0	3-month protocol
COLLAGEN	COL1A1	ITGA1_ITGB1	Fibroblasts	Endothelial cells (baboon)	6.13804e-06	0	3-month protocol
COLLAGEN	COL1A1	ITGA1_ITGB1	Fibroblasts	Mural cells	5.45556e-05	0	Rejection
COLLAGEN	COL1A1	ITGA1_ITGB1	Fibroblasts	Mural cells	1.73608e-05	0	3-month protocol
COLLAGEN	COL1A1	ITGA1_ITGB1	Fibroblasts	Neuronal cells	2.72786e-05	0	Rejection
COLLAGEN	COL1A1	ITGA1_ITGB1	Fibroblasts	Neuronal cells	1.50349e-05	0	3-month protocol
COLLAGEN	COL1A1	ITGA1_ITGB1	Fibroblasts	Vascular EC	4.31305e-05	0	Rejection
COLLAGEN	COL1A1	ITGA1_ITGB1	Fibroblasts	Vascular EC	1.73608e-05	0	3-month protocol
COLLAGEN	COL1A1	ITGA2_ITGB1	Fibroblasts	Vascular EC	1.9289e-05	0	Rejection
COLLAGEN	COL1A1	ITGA9_ITGB1	Fibroblasts	CM	1.9289e-05	0	Rejection
COLLAGEN	COL1A1	ITGA9_ITGB1	Fibroblasts	Endocardial/lymphatic EC	0.000115723	0	Rejection
COLLAGEN	COL1A1	ITGA9_ITGB1	Fibroblasts	Endocardial/lymphatic EC	2.6041e-05	0	3-month protocol
COLLAGEN	COL1A1	ITGA9_ITGB1	Fibroblasts	Endothelial cells (baboon)	1.06314e-05	0	3-month protocol
COLLAGEN	COL1A1	ITGA9_ITGB1	Fibroblasts	Vascular EC	1.9289e-05	0	Rejection
COLLAGEN	COL1A1	ITGA9_ITGB1	Fibroblasts	Vascular EC	8.68048e-06	0	3-month protocol
COLLAGEN	COL1A1	ITGAV_ITGB8	Fibroblasts	CM	4.31305e-05	0	Rejection
COLLAGEN	COL1A1	ITGAV_ITGB8	Fibroblasts	CM	1.73608e-05	0	3-month protocol
COLLAGEN	COL1A1	ITGAV_ITGB8	Fibroblasts	Neuronal cells	2.55168e-05	0	Rejection
COLLAGEN	COL1A2	CD44	Fibroblasts	CM	2.41111e-05	0	Rejection
COLLAGEN	COL1A2	CD44	Fibroblasts	Endothelial cells (baboon)	2.41111e-05	0	Rejection
COLLAGEN	COL1A2	CD44	Fibroblasts	Lymphoids (baboon)	2.41111e-05	0	Rejection
COLLAGEN	COL1A2	CD44	Fibroblasts	Lymphoids (baboon)	3.4721e-05	0	3-month protocol
COLLAGEN	COL1A2	CD44	Fibroblasts	Mast cells (baboon)	2.41111e-05	0	Rejection
COLLAGEN	COL1A2	CD44	Fibroblasts	Mast cells (baboon)	8.68048e-06	0	3-month protocol
COLLAGEN	COL1A2	CD44	Fibroblasts	Myeloids (baboon)	2.41111e-05	0	Rejection
COLLAGEN	COL1A2	CD44	Fibroblasts	Myeloids (baboon)	3.4721e-05	0	3-month protocol
COLLAGEN	COL1A2	CD44	Fibroblasts	Neuronal cells	1.20557e-05	0	Rejection
COLLAGEN	COL1A2	CD44	Fibroblasts	Resident Immune	2.41111e-05	0	Rejection
COLLAGEN	COL1A2	CD44	Mural cells	CM	4.82232e-06	0	Rejection
COLLAGEN	COL1A2	CD44	Mural cells	Endothelial cells (baboon)	4.82232e-06	0	Rejection
COLLAGEN	COL1A2	CD44	Mural cells	Lymphoids (baboon)	4.82232e-06	0	Rejection
COLLAGEN	COL1A2	CD44	Mural cells	Mast cells (baboon)	4.82232e-06	0	Rejection
COLLAGEN	COL1A2	CD44	Mural cells	Myeloids (baboon)	4.82232e-06	0	Rejection
COLLAGEN	COL1A2	CD44	Mural cells	Neuronal cells	2.41117e-06	0	Rejection
COLLAGEN	COL1A2	CD44	Mural cells	Resident Immune	4.82232e-06	0	Rejection
COLLAGEN	COL1A2	ITGA11_ITGB1	Fibroblasts	Fibroblasts	4.82211e-05	0	Rejection
COLLAGEN	COL1A2	ITGA11_ITGB1	Mural cells	Fibroblasts	9.6446e-06	0	Rejection
COLLAGEN	COL1A2	ITGA1_ITGB1	Fibroblasts	Endocardial/lymphatic EC	0.000107819	0	Rejection
COLLAGEN	COL1A2	ITGA1_ITGB1	Fibroblasts	Endocardial/lymphatic EC	6.94396e-05	0	3-month protocol
COLLAGEN	COL1A2	ITGA1_ITGB1	Fibroblasts	Endothelial cells (baboon)	2.45517e-05	0	3-month protocol
COLLAGEN	COL1A2	ITGA1_ITGB1	Fibroblasts	Mural cells	6.81936e-05	0	Rejection
COLLAGEN	COL1A2	ITGA1_ITGB1	Fibroblasts	Mural cells	6.94396e-05	0	3-month protocol
COLLAGEN	COL1A2	ITGA1_ITGB1	Fibroblasts	Neuronal cells	3.4098e-05	0	Rejection
COLLAGEN	COL1A2	ITGA1_ITGB1	Fibroblasts	Neuronal cells	6.0137e-05	0	3-month protocol
COLLAGEN	COL1A2	ITGA1_ITGB1	Fibroblasts	Vascular EC	5.39125e-05	0	Rejection
COLLAGEN	COL1A2	ITGA1_ITGB1	Fibroblasts	Vascular EC	6.94396e-05	0	3-month protocol
COLLAGEN	COL1A2	ITGA1_ITGB1	Mural cells	Endocardial/lymphatic EC	2.15657e-05	0	Rejection
COLLAGEN	COL1A2	ITGA1_ITGB1	Mural cells	Mural cells	1.36395e-05	0	Rejection
COLLAGEN	COL1A2	ITGA1_ITGB1	Mural cells	Neuronal cells	6.81978e-06	0	Rejection
COLLAGEN	COL1A2	ITGA1_ITGB1	Mural cells	Vascular EC	1.0783e-05	0	Rejection
COLLAGEN	COL1A2	ITGA2_ITGB1	Fibroblasts	Vascular EC	2.41111e-05	0	Rejection
COLLAGEN	COL1A2	ITGA2_ITGB1	Mural cells	Vascular EC	4.82232e-06	0	Rejection
COLLAGEN	COL1A2	ITGA9_ITGB1	Fibroblasts	CM	2.41111e-05	0	Rejection
COLLAGEN	COL1A2	ITGA9_ITGB1	Fibroblasts	Endocardial/lymphatic EC	0.000144649	0	Rejection
COLLAGEN	COL1A2	ITGA9_ITGB1	Fibroblasts	Endocardial/lymphatic EC	0.000104156	0	3-month protocol
COLLAGEN	COL1A2	ITGA9_ITGB1	Fibroblasts	Endothelial cells (baboon)	4.25241e-05	0	3-month protocol
COLLAGEN	COL1A2	ITGA9_ITGB1	Fibroblasts	Vascular EC	2.41111e-05	0	Rejection
COLLAGEN	COL1A2	ITGA9_ITGB1	Fibroblasts	Vascular EC	3.4721e-05	0	3-month protocol
COLLAGEN	COL1A2	ITGA9_ITGB1	Mural cells	CM	4.82232e-06	0	Rejection
COLLAGEN	COL1A2	ITGA9_ITGB1	Mural cells	Endocardial/lymphatic EC	2.89332e-05	0	Rejection
COLLAGEN	COL1A2	ITGA9_ITGB1	Mural cells	Vascular EC	4.82232e-06	0	Rejection
COLLAGEN	COL1A2	ITGAV_ITGB8	Fibroblasts	CM	5.39125e-05	0	Rejection
COLLAGEN	COL1A2	ITGAV_ITGB8	Fibroblasts	CM	6.94396e-05	0	3-month protocol
COLLAGEN	COL1A2	ITGAV_ITGB8	Fibroblasts	Neuronal cells	3.18958e-05	0	Rejection
COLLAGEN	COL1A2	ITGAV_ITGB8	Mural cells	CM	1.0783e-05	0	Rejection
COLLAGEN	COL1A2	ITGAV_ITGB8	Mural cells	Neuronal cells	6.37932e-06	0	Rejection
COLLAGEN	COL4A1	CD44	Endothelial cells (baboon)	CM	4.82232e-06	0	Rejection
COLLAGEN	COL4A1	CD44	Endothelial cells (baboon)	Endothelial cells (baboon)	4.82232e-06	0	Rejection
COLLAGEN	COL4A1	CD44	Endothelial cells (baboon)	Lymphoids (baboon)	4.82232e-06	0	Rejection
COLLAGEN	COL4A1	CD44	Endothelial cells (baboon)	Lymphoids (baboon)	1.73608e-05	0	3-month protocol
COLLAGEN	COL4A1	CD44	Endothelial cells (baboon)	Mast cells (baboon)	4.82232e-06	0	Rejection
COLLAGEN	COL4A1	CD44	Endothelial cells (baboon)	Mast cells (baboon)	4.34026e-06	0	3-month protocol
COLLAGEN	COL4A1	CD44	Endothelial cells (baboon)	Myeloids (baboon)	4.82232e-06	0	Rejection
COLLAGEN	COL4A1	CD44	Endothelial cells (baboon)	Myeloids (baboon)	1.73608e-05	0	3-month protocol
COLLAGEN	COL4A1	CD44	Endothelial cells (baboon)	Neuronal cells	2.41117e-06	0	Rejection
COLLAGEN	COL4A1	CD44	Endothelial cells (baboon)	Resident Immune	4.82232e-06	0	Rejection
COLLAGEN	COL4A1	ITGA11_ITGB1	Endothelial cells (baboon)	Fibroblasts	9.6446e-06	0	Rejection
COLLAGEN	COL4A1	ITGA1_ITGB1	Endothelial cells (baboon)	Endocardial/lymphatic EC	2.15657e-05	0	Rejection
COLLAGEN	COL4A1	ITGA1_ITGB1	Endothelial cells (baboon)	Endocardial/lymphatic EC	3.4721e-05	0	3-month protocol
COLLAGEN	COL4A1	ITGA1_ITGB1	Endothelial cells (baboon)	Endothelial cells (baboon)	1.2276e-05	0	3-month protocol
COLLAGEN	COL4A1	ITGA1_ITGB1	Endothelial cells (baboon)	Mural cells	1.36395e-05	0	Rejection
COLLAGEN	COL4A1	ITGA1_ITGB1	Endothelial cells (baboon)	Mural cells	3.4721e-05	0	3-month protocol
COLLAGEN	COL4A1	ITGA1_ITGB1	Endothelial cells (baboon)	Neuronal cells	6.81978e-06	0	Rejection
COLLAGEN	COL4A1	ITGA1_ITGB1	Endothelial cells (baboon)	Neuronal cells	3.00694e-05	0	3-month protocol
COLLAGEN	COL4A1	ITGA1_ITGB1	Endothelial cells (baboon)	Vascular EC	1.0783e-05	0	Rejection
COLLAGEN	COL4A1	ITGA1_ITGB1	Endothelial cells (baboon)	Vascular EC	3.4721e-05	0	3-month protocol
COLLAGEN	COL4A1	ITGA2_ITGB1	Endothelial cells (baboon)	Vascular EC	4.82232e-06	0	Rejection
COLLAGEN	COL4A1	ITGA9_ITGB1	Endothelial cells (baboon)	CM	4.82232e-06	0	Rejection
COLLAGEN	COL4A1	ITGA9_ITGB1	Endothelial cells (baboon)	Endocardial/lymphatic EC	2.89332e-05	0	Rejection
COLLAGEN	COL4A1	ITGA9_ITGB1	Endothelial cells (baboon)	Endocardial/lymphatic EC	5.20806e-05	0	3-month protocol
COLLAGEN	COL4A1	ITGA9_ITGB1	Endothelial cells (baboon)	Endothelial cells (baboon)	2.12625e-05	0	3-month protocol
COLLAGEN	COL4A1	ITGA9_ITGB1	Endothelial cells (baboon)	Vascular EC	4.82232e-06	0	Rejection
COLLAGEN	COL4A1	ITGA9_ITGB1	Endothelial cells (baboon)	Vascular EC	1.73608e-05	0	3-month protocol
COLLAGEN	COL4A1	ITGAV_ITGB8	Endothelial cells (baboon)	CM	1.0783e-05	0	Rejection
COLLAGEN	COL4A1	ITGAV_ITGB8	Endothelial cells (baboon)	CM	3.4721e-05	0	3-month protocol
COLLAGEN	COL4A1	ITGAV_ITGB8	Endothelial cells (baboon)	Neuronal cells	6.37932e-06	0	Rejection
COLLAGEN	COL4A2	CD44	CM	CM	1.9289e-05	0	Rejection
COLLAGEN	COL4A2	CD44	CM	Lymphoids (baboon)	1.9289e-05	0	Rejection
COLLAGEN	COL4A2	CD44	CM	Lymphoids (baboon)	3.4721e-05	0	3-month protocol
COLLAGEN	COL4A2	CD44	CM	Mast cells (baboon)	1.9289e-05	0.02	Rejection
COLLAGEN	COL4A2	CD44	CM	Myeloids (baboon)	1.9289e-05	0	Rejection
COLLAGEN	COL4A2	CD44	CM	Myeloids (baboon)	3.4721e-05	0	3-month protocol
COLLAGEN	COL4A2	CD44	CM	Resident Immune	1.9289e-05	0	Rejection
COLLAGEN	COL4A2	CD44	Endocardial/lymphatic EC	CM	2.41111e-05	0	Rejection
COLLAGEN	COL4A2	CD44	Endocardial/lymphatic EC	Lymphoids (baboon)	2.41111e-05	0	Rejection
COLLAGEN	COL4A2	CD44	Endocardial/lymphatic EC	Lymphoids (baboon)	3.4721e-05	0	3-month protocol
COLLAGEN	COL4A2	CD44	Endocardial/lymphatic EC	Mast cells (baboon)	2.41111e-05	0	Rejection
COLLAGEN	COL4A2	CD44	Endocardial/lymphatic EC	Myeloids (baboon)	2.41111e-05	0	Rejection
COLLAGEN	COL4A2	CD44	Endocardial/lymphatic EC	Myeloids (baboon)	3.4721e-05	0	3-month protocol
COLLAGEN	COL4A2	CD44	Endocardial/lymphatic EC	Resident Immune	2.41111e-05	0	Rejection
COLLAGEN	COL4A2	CD44	Endothelial cells (baboon)	Lymphoids (baboon)	3.0381e-05	0	3-month protocol
COLLAGEN	COL4A2	CD44	Endothelial cells (baboon)	Myeloids (baboon)	3.0381e-05	0	3-month protocol
COLLAGEN	COL4A2	CD44	Fibroblasts	CM	4.82211e-05	0	Rejection
COLLAGEN	COL4A2	CD44	Fibroblasts	Lymphoids (baboon)	4.82211e-05	0	Rejection
COLLAGEN	COL4A2	CD44	Fibroblasts	Lymphoids (baboon)	3.4721e-05	0	3-month protocol
COLLAGEN	COL4A2	CD44	Fibroblasts	Mast cells (baboon)	4.82211e-05	0	Rejection
COLLAGEN	COL4A2	CD44	Fibroblasts	Myeloids (baboon)	4.82211e-05	0	Rejection
COLLAGEN	COL4A2	CD44	Fibroblasts	Myeloids (baboon)	3.4721e-05	0	3-month protocol
COLLAGEN	COL4A2	CD44	Fibroblasts	Neuronal cells	2.41111e-05	0	Rejection
COLLAGEN	COL4A2	CD44	Fibroblasts	Resident Immune	4.82211e-05	0	Rejection
COLLAGEN	COL4A2	CD44	Mural cells	CM	4.33992e-05	0	Rejection
COLLAGEN	COL4A2	CD44	Mural cells	Endothelial cells (baboon)	4.33992e-05	0.04	Rejection
COLLAGEN	COL4A2	CD44	Mural cells	Lymphoids (baboon)	4.33992e-05	0	Rejection
COLLAGEN	COL4A2	CD44	Mural cells	Lymphoids (baboon)	4.34009e-05	0	3-month protocol
COLLAGEN	COL4A2	CD44	Mural cells	Mast cells (baboon)	4.33992e-05	0	Rejection
COLLAGEN	COL4A2	CD44	Mural cells	Myeloids (baboon)	4.33992e-05	0	Rejection
COLLAGEN	COL4A2	CD44	Mural cells	Myeloids (baboon)	4.34009e-05	0	3-month protocol
COLLAGEN	COL4A2	CD44	Mural cells	Neuronal cells	2.17001e-05	0	Rejection
COLLAGEN	COL4A2	CD44	Mural cells	Resident Immune	4.33992e-05	0	Rejection
COLLAGEN	COL4A2	CD44	Neuronal cells	Lymphoids (baboon)	8.68048e-06	0	3-month protocol
COLLAGEN	COL4A2	CD44	Neuronal cells	Myeloids (baboon)	8.68048e-06	0	3-month protocol
COLLAGEN	COL4A2	CD44	Vascular EC	CM	2.41111e-05	0	Rejection
COLLAGEN	COL4A2	CD44	Vascular EC	Lymphoids (baboon)	2.41111e-05	0	Rejection
COLLAGEN	COL4A2	CD44	Vascular EC	Lymphoids (baboon)	3.4721e-05	0	3-month protocol
COLLAGEN	COL4A2	CD44	Vascular EC	Mast cells (baboon)	2.41111e-05	0	Rejection
COLLAGEN	COL4A2	CD44	Vascular EC	Myeloids (baboon)	2.41111e-05	0	Rejection
COLLAGEN	COL4A2	CD44	Vascular EC	Myeloids (baboon)	3.4721e-05	0	3-month protocol
COLLAGEN	COL4A2	CD44	Vascular EC	Resident Immune	2.41111e-05	0	Rejection
COLLAGEN	COL4A2	ITGA11_ITGB1	CM	Fibroblasts	3.85773e-05	0	Rejection
COLLAGEN	COL4A2	ITGA11_ITGB1	Endocardial/lymphatic EC	Fibroblasts	4.82211e-05	0	Rejection
COLLAGEN	COL4A2	ITGA11_ITGB1	Endothelial cells (baboon)	Fibroblasts	2.89332e-05	0	Rejection
COLLAGEN	COL4A2	ITGA11_ITGB1	Fibroblasts	Fibroblasts	9.64376e-05	0	Rejection
COLLAGEN	COL4A2	ITGA11_ITGB1	Mural cells	Fibroblasts	8.67947e-05	0	Rejection
COLLAGEN	COL4A2	ITGA11_ITGB1	Neuronal cells	Fibroblasts	2.89332e-05	0	Rejection
COLLAGEN	COL4A2	ITGA11_ITGB1	Vascular EC	Fibroblasts	4.82211e-05	0	Rejection
COLLAGEN	COL4A2	ITGA1_ITGB1	CM	Endocardial/lymphatic EC	8.62573e-05	0	Rejection
COLLAGEN	COL4A2	ITGA1_ITGB1	CM	Endocardial/lymphatic EC	6.94396e-05	0	3-month protocol
COLLAGEN	COL4A2	ITGA1_ITGB1	CM	Endothelial cells (baboon)	2.45517e-05	0.02	3-month protocol
COLLAGEN	COL4A2	ITGA1_ITGB1	CM	Mural cells	5.45556e-05	0	Rejection
COLLAGEN	COL4A2	ITGA1_ITGB1	CM	Mural cells	6.94396e-05	0	3-month protocol
COLLAGEN	COL4A2	ITGA1_ITGB1	CM	Neuronal cells	2.72786e-05	0	Rejection
COLLAGEN	COL4A2	ITGA1_ITGB1	CM	Neuronal cells	6.0137e-05	0	3-month protocol
COLLAGEN	COL4A2	ITGA1_ITGB1	CM	Vascular EC	4.31305e-05	0	Rejection
COLLAGEN	COL4A2	ITGA1_ITGB1	CM	Vascular EC	6.94396e-05	0	3-month protocol
COLLAGEN	COL4A2	ITGA1_ITGB1	Endocardial/lymphatic EC	Endocardial/lymphatic EC	0.000107819	0	Rejection
COLLAGEN	COL4A2	ITGA1_ITGB1	Endocardial/lymphatic EC	Endocardial/lymphatic EC	6.94396e-05	0	3-month protocol
COLLAGEN	COL4A2	ITGA1_ITGB1	Endocardial/lymphatic EC	Endothelial cells (baboon)	2.45517e-05	0.01	3-month protocol
COLLAGEN	COL4A2	ITGA1_ITGB1	Endocardial/lymphatic EC	Mural cells	6.81936e-05	0	Rejection
COLLAGEN	COL4A2	ITGA1_ITGB1	Endocardial/lymphatic EC	Mural cells	6.94396e-05	0	3-month protocol
COLLAGEN	COL4A2	ITGA1_ITGB1	Endocardial/lymphatic EC	Neuronal cells	3.4098e-05	0	Rejection
COLLAGEN	COL4A2	ITGA1_ITGB1	Endocardial/lymphatic EC	Neuronal cells	6.0137e-05	0	3-month protocol
COLLAGEN	COL4A2	ITGA1_ITGB1	Endocardial/lymphatic EC	Vascular EC	5.39125e-05	0	Rejection
COLLAGEN	COL4A2	ITGA1_ITGB1	Endocardial/lymphatic EC	Vascular EC	6.94396e-05	0	3-month protocol
COLLAGEN	COL4A2	ITGA1_ITGB1	Endothelial cells (baboon)	Endocardial/lymphatic EC	6.46944e-05	0	Rejection
COLLAGEN	COL4A2	ITGA1_ITGB1	Endothelial cells (baboon)	Endocardial/lymphatic EC	6.07602e-05	0	3-month protocol
COLLAGEN	COL4A2	ITGA1_ITGB1	Endothelial cells (baboon)	Endothelial cells (baboon)	2.14828e-05	0.02	3-month protocol
COLLAGEN	COL4A2	ITGA1_ITGB1	Endothelial cells (baboon)	Mural cells	4.09173e-05	0	Rejection
COLLAGEN	COL4A2	ITGA1_ITGB1	Endothelial cells (baboon)	Mural cells	6.07602e-05	0	3-month protocol
COLLAGEN	COL4A2	ITGA1_ITGB1	Endothelial cells (baboon)	Neuronal cells	2.04591e-05	0	Rejection
COLLAGEN	COL4A2	ITGA1_ITGB1	Endothelial cells (baboon)	Neuronal cells	5.26203e-05	0	3-month protocol
COLLAGEN	COL4A2	ITGA1_ITGB1	Endothelial cells (baboon)	Vascular EC	3.23482e-05	0	Rejection
COLLAGEN	COL4A2	ITGA1_ITGB1	Endothelial cells (baboon)	Vascular EC	6.07602e-05	0	3-month protocol
COLLAGEN	COL4A2	ITGA1_ITGB1	Fibroblasts	Endocardial/lymphatic EC	0.000215615	0	Rejection
COLLAGEN	COL4A2	ITGA1_ITGB1	Fibroblasts	Endocardial/lymphatic EC	6.94396e-05	0	3-month protocol
COLLAGEN	COL4A2	ITGA1_ITGB1	Fibroblasts	Endothelial cells (baboon)	2.45517e-05	0.02	3-month protocol
COLLAGEN	COL4A2	ITGA1_ITGB1	Fibroblasts	Mural cells	0.000136378	0	Rejection
COLLAGEN	COL4A2	ITGA1_ITGB1	Fibroblasts	Mural cells	6.94396e-05	0	3-month protocol
COLLAGEN	COL4A2	ITGA1_ITGB1	Fibroblasts	Neuronal cells	6.81936e-05	0	Rejection
COLLAGEN	COL4A2	ITGA1_ITGB1	Fibroblasts	Neuronal cells	6.0137e-05	0	3-month protocol
COLLAGEN	COL4A2	ITGA1_ITGB1	Fibroblasts	Vascular EC	0.000107819	0	Rejection
COLLAGEN	COL4A2	ITGA1_ITGB1	Fibroblasts	Vascular EC	6.94396e-05	0	3-month protocol
COLLAGEN	COL4A2	ITGA1_ITGB1	Mural cells	Endocardial/lymphatic EC	0.000194058	0	Rejection
COLLAGEN	COL4A2	ITGA1_ITGB1	Mural cells	Endocardial/lymphatic EC	8.6798e-05	0	3-month protocol
COLLAGEN	COL4A2	ITGA1_ITGB1	Mural cells	Endothelial cells (baboon)	3.06895e-05	0.02	3-month protocol
COLLAGEN	COL4A2	ITGA1_ITGB1	Mural cells	Mural cells	0.000122742	0	Rejection
COLLAGEN	COL4A2	ITGA1_ITGB1	Mural cells	Mural cells	8.6798e-05	0	3-month protocol
COLLAGEN	COL4A2	ITGA1_ITGB1	Mural cells	Neuronal cells	6.13747e-05	0	Rejection
COLLAGEN	COL4A2	ITGA1_ITGB1	Mural cells	Neuronal cells	7.51702e-05	0	3-month protocol
COLLAGEN	COL4A2	ITGA1_ITGB1	Mural cells	Vascular EC	9.70384e-05	0	Rejection
COLLAGEN	COL4A2	ITGA1_ITGB1	Mural cells	Vascular EC	8.6798e-05	0	3-month protocol
COLLAGEN	COL4A2	ITGA1_ITGB1	Neuronal cells	Endocardial/lymphatic EC	6.46944e-05	0	Rejection
COLLAGEN	COL4A2	ITGA1_ITGB1	Neuronal cells	Endocardial/lymphatic EC	1.73608e-05	0	3-month protocol
COLLAGEN	COL4A2	ITGA1_ITGB1	Neuronal cells	Endothelial cells (baboon)	6.13804e-06	0.02	3-month protocol
COLLAGEN	COL4A2	ITGA1_ITGB1	Neuronal cells	Mural cells	4.09173e-05	0	Rejection
COLLAGEN	COL4A2	ITGA1_ITGB1	Neuronal cells	Mural cells	1.73608e-05	0	3-month protocol
COLLAGEN	COL4A2	ITGA1_ITGB1	Neuronal cells	Neuronal cells	2.04591e-05	0	Rejection
COLLAGEN	COL4A2	ITGA1_ITGB1	Neuronal cells	Neuronal cells	1.50349e-05	0	3-month protocol
COLLAGEN	COL4A2	ITGA1_ITGB1	Neuronal cells	Vascular EC	3.23482e-05	0	Rejection
COLLAGEN	COL4A2	ITGA1_ITGB1	Neuronal cells	Vascular EC	1.73608e-05	0	3-month protocol
COLLAGEN	COL4A2	ITGA1_ITGB1	Vascular EC	Endocardial/lymphatic EC	0.000107819	0	Rejection
COLLAGEN	COL4A2	ITGA1_ITGB1	Vascular EC	Endocardial/lymphatic EC	6.94396e-05	0	3-month protocol
COLLAGEN	COL4A2	ITGA1_ITGB1	Vascular EC	Endothelial cells (baboon)	2.45517e-05	0.02	3-month protocol
COLLAGEN	COL4A2	ITGA1_ITGB1	Vascular EC	Mural cells	6.81936e-05	0	Rejection
COLLAGEN	COL4A2	ITGA1_ITGB1	Vascular EC	Mural cells	6.94396e-05	0	3-month protocol
COLLAGEN	COL4A2	ITGA1_ITGB1	Vascular EC	Neuronal cells	3.4098e-05	0	Rejection
COLLAGEN	COL4A2	ITGA1_ITGB1	Vascular EC	Neuronal cells	6.0137e-05	0	3-month protocol
COLLAGEN	COL4A2	ITGA1_ITGB1	Vascular EC	Vascular EC	5.39125e-05	0	Rejection
COLLAGEN	COL4A2	ITGA1_ITGB1	Vascular EC	Vascular EC	6.94396e-05	0	3-month protocol
COLLAGEN	COL4A2	ITGA2_ITGB1	CM	Vascular EC	1.9289e-05	0	Rejection
COLLAGEN	COL4A2	ITGA2_ITGB1	Endocardial/lymphatic EC	Vascular EC	2.41111e-05	0	Rejection
COLLAGEN	COL4A2	ITGA2_ITGB1	Endothelial cells (baboon)	Vascular EC	1.44668e-05	0	Rejection
COLLAGEN	COL4A2	ITGA2_ITGB1	Fibroblasts	Vascular EC	4.82211e-05	0	Rejection
COLLAGEN	COL4A2	ITGA2_ITGB1	Mural cells	Vascular EC	4.33992e-05	0	Rejection
COLLAGEN	COL4A2	ITGA2_ITGB1	Neuronal cells	Vascular EC	1.44668e-05	0	Rejection
COLLAGEN	COL4A2	ITGA2_ITGB1	Vascular EC	Vascular EC	2.41111e-05	0	Rejection
COLLAGEN	COL4A2	ITGA9_ITGB1	CM	CM	1.9289e-05	0	Rejection
COLLAGEN	COL4A2	ITGA9_ITGB1	CM	Endocardial/lymphatic EC	0.000115723	0	Rejection
COLLAGEN	COL4A2	ITGA9_ITGB1	CM	Endocardial/lymphatic EC	0.000104156	0	3-month protocol
COLLAGEN	COL4A2	ITGA9_ITGB1	CM	Vascular EC	1.9289e-05	0	Rejection
COLLAGEN	COL4A2	ITGA9_ITGB1	CM	Vascular EC	3.4721e-05	0	3-month protocol
COLLAGEN	COL4A2	ITGA9_ITGB1	Endocardial/lymphatic EC	CM	2.41111e-05	0	Rejection
COLLAGEN	COL4A2	ITGA9_ITGB1	Endocardial/lymphatic EC	Endocardial/lymphatic EC	0.000144649	0	Rejection
COLLAGEN	COL4A2	ITGA9_ITGB1	Endocardial/lymphatic EC	Endocardial/lymphatic EC	0.000104156	0	3-month protocol
COLLAGEN	COL4A2	ITGA9_ITGB1	Endocardial/lymphatic EC	Vascular EC	2.41111e-05	0	Rejection
COLLAGEN	COL4A2	ITGA9_ITGB1	Endocardial/lymphatic EC	Vascular EC	3.4721e-05	0	3-month protocol
COLLAGEN	COL4A2	ITGA9_ITGB1	Endothelial cells (baboon)	CM	1.44668e-05	0	Rejection
COLLAGEN	COL4A2	ITGA9_ITGB1	Endothelial cells (baboon)	Endocardial/lymphatic EC	8.67947e-05	0	Rejection
COLLAGEN	COL4A2	ITGA9_ITGB1	Endothelial cells (baboon)	Endocardial/lymphatic EC	9.11375e-05	0	3-month protocol
COLLAGEN	COL4A2	ITGA9_ITGB1	Endothelial cells (baboon)	Vascular EC	1.44668e-05	0.01	Rejection
COLLAGEN	COL4A2	ITGA9_ITGB1	Endothelial cells (baboon)	Vascular EC	3.0381e-05	0.03	3-month protocol
COLLAGEN	COL4A2	ITGA9_ITGB1	Fibroblasts	CM	4.82211e-05	0	Rejection
COLLAGEN	COL4A2	ITGA9_ITGB1	Fibroblasts	Endocardial/lymphatic EC	0.000289257	0	Rejection
COLLAGEN	COL4A2	ITGA9_ITGB1	Fibroblasts	Endocardial/lymphatic EC	0.000104156	0	3-month protocol
COLLAGEN	COL4A2	ITGA9_ITGB1	Fibroblasts	Vascular EC	4.82211e-05	0	Rejection
COLLAGEN	COL4A2	ITGA9_ITGB1	Fibroblasts	Vascular EC	3.4721e-05	0	3-month protocol
COLLAGEN	COL4A2	ITGA9_ITGB1	Mural cells	CM	4.33992e-05	0	Rejection
COLLAGEN	COL4A2	ITGA9_ITGB1	Mural cells	Endocardial/lymphatic EC	0.000260339	0	Rejection
COLLAGEN	COL4A2	ITGA9_ITGB1	Mural cells	Endocardial/lymphatic EC	0.000130191	0	3-month protocol
COLLAGEN	COL4A2	ITGA9_ITGB1	Mural cells	Vascular EC	4.33992e-05	0	Rejection
COLLAGEN	COL4A2	ITGA9_ITGB1	Mural cells	Vascular EC	4.34009e-05	0	3-month protocol
COLLAGEN	COL4A2	ITGA9_ITGB1	Neuronal cells	CM	1.44668e-05	0	Rejection
COLLAGEN	COL4A2	ITGA9_ITGB1	Neuronal cells	Endocardial/lymphatic EC	8.67947e-05	0	Rejection
COLLAGEN	COL4A2	ITGA9_ITGB1	Neuronal cells	Vascular EC	1.44668e-05	0.02	Rejection
COLLAGEN	COL4A2	ITGA9_ITGB1	Vascular EC	CM	2.41111e-05	0	Rejection
COLLAGEN	COL4A2	ITGA9_ITGB1	Vascular EC	Endocardial/lymphatic EC	0.000144649	0	Rejection
COLLAGEN	COL4A2	ITGA9_ITGB1	Vascular EC	Endocardial/lymphatic EC	0.000104156	0	3-month protocol
COLLAGEN	COL4A2	ITGA9_ITGB1	Vascular EC	Vascular EC	2.41111e-05	0	Rejection
COLLAGEN	COL4A2	ITGA9_ITGB1	Vascular EC	Vascular EC	3.4721e-05	0	3-month protocol
COLLAGEN	COL4A2	ITGAV_ITGB8	CM	CM	4.31305e-05	0	Rejection
COLLAGEN	COL4A2	ITGAV_ITGB8	CM	CM	6.94396e-05	0	3-month protocol
COLLAGEN	COL4A2	ITGAV_ITGB8	Endocardial/lymphatic EC	CM	5.39125e-05	0	Rejection
COLLAGEN	COL4A2	ITGAV_ITGB8	Endocardial/lymphatic EC	CM	6.94396e-05	0	3-month protocol
COLLAGEN	COL4A2	ITGAV_ITGB8	Endothelial cells (baboon)	CM	6.07602e-05	0	3-month protocol
COLLAGEN	COL4A2	ITGAV_ITGB8	Fibroblasts	CM	0.000107819	0	Rejection
COLLAGEN	COL4A2	ITGAV_ITGB8	Fibroblasts	CM	6.94396e-05	0	3-month protocol
COLLAGEN	COL4A2	ITGAV_ITGB8	Fibroblasts	Neuronal cells	6.37896e-05	0	Rejection
COLLAGEN	COL4A2	ITGAV_ITGB8	Mural cells	CM	9.70384e-05	0	Rejection
COLLAGEN	COL4A2	ITGAV_ITGB8	Mural cells	CM	8.6798e-05	0	3-month protocol
COLLAGEN	COL4A2	ITGAV_ITGB8	Mural cells	Neuronal cells	5.7411e-05	0	Rejection
COLLAGEN	COL4A2	ITGAV_ITGB8	Neuronal cells	CM	3.23482e-05	0	Rejection
COLLAGEN	COL4A2	ITGAV_ITGB8	Neuronal cells	CM	1.73608e-05	0	3-month protocol
COLLAGEN	COL4A2	ITGAV_ITGB8	Vascular EC	CM	5.39125e-05	0	Rejection
COLLAGEN	COL4A2	ITGAV_ITGB8	Vascular EC	CM	6.94396e-05	0	3-month protocol
COLLAGEN	COL4A5	CD44	CM	CM	4.82232e-06	0	Rejection
COLLAGEN	COL4A5	CD44	CM	Endothelial cells (baboon)	4.82232e-06	0	Rejection
COLLAGEN	COL4A5	CD44	CM	Lymphoids (baboon)	4.82232e-06	0	Rejection
COLLAGEN	COL4A5	CD44	CM	Mast cells (baboon)	4.82232e-06	0	Rejection
COLLAGEN	COL4A5	CD44	CM	Myeloids (baboon)	4.82232e-06	0	Rejection
COLLAGEN	COL4A5	CD44	CM	Neuronal cells	2.41117e-06	0	Rejection
COLLAGEN	COL4A5	CD44	CM	Resident Immune	4.82232e-06	0	Rejection
COLLAGEN	COL4A5	ITGA11_ITGB1	CM	Fibroblasts	9.6446e-06	0	Rejection
COLLAGEN	COL4A5	ITGA1_ITGB1	CM	Endocardial/lymphatic EC	2.15657e-05	0	Rejection
COLLAGEN	COL4A5	ITGA1_ITGB1	CM	Mural cells	1.36395e-05	0	Rejection
COLLAGEN	COL4A5	ITGA1_ITGB1	CM	Neuronal cells	6.81978e-06	0	Rejection
COLLAGEN	COL4A5	ITGA1_ITGB1	CM	Vascular EC	1.0783e-05	0	Rejection
COLLAGEN	COL4A5	ITGA2_ITGB1	CM	Vascular EC	4.82232e-06	0	Rejection
COLLAGEN	COL4A5	ITGA9_ITGB1	CM	CM	4.82232e-06	0	Rejection
COLLAGEN	COL4A5	ITGA9_ITGB1	CM	Endocardial/lymphatic EC	2.89332e-05	0	Rejection
COLLAGEN	COL4A5	ITGA9_ITGB1	CM	Vascular EC	4.82232e-06	0	Rejection
COLLAGEN	COL4A5	ITGAV_ITGB8	CM	CM	1.0783e-05	0	Rejection
COLLAGEN	COL4A5	ITGAV_ITGB8	CM	Neuronal cells	6.37932e-06	0	Rejection
COLLAGEN	COL6A1	CD44	Fibroblasts	CM	4.82232e-06	0	Rejection
COLLAGEN	COL6A1	CD44	Fibroblasts	Endothelial cells (baboon)	4.82232e-06	0	Rejection
COLLAGEN	COL6A1	CD44	Fibroblasts	Lymphoids (baboon)	4.82232e-06	0	Rejection
COLLAGEN	COL6A1	CD44	Fibroblasts	Lymphoids (baboon)	8.68048e-06	0	3-month protocol
COLLAGEN	COL6A1	CD44	Fibroblasts	Mast cells (baboon)	4.82232e-06	0	Rejection
COLLAGEN	COL6A1	CD44	Fibroblasts	Mast cells (baboon)	2.17013e-06	0	3-month protocol
COLLAGEN	COL6A1	CD44	Fibroblasts	Myeloids (baboon)	4.82232e-06	0	Rejection
COLLAGEN	COL6A1	CD44	Fibroblasts	Myeloids (baboon)	8.68048e-06	0	3-month protocol
COLLAGEN	COL6A1	CD44	Fibroblasts	Neuronal cells	2.41117e-06	0	Rejection
COLLAGEN	COL6A1	CD44	Fibroblasts	Resident Immune	4.82232e-06	0	Rejection
COLLAGEN	COL6A1	ITGA11_ITGB1	Fibroblasts	Fibroblasts	9.6446e-06	0	Rejection
COLLAGEN	COL6A1	ITGA1_ITGB1	Fibroblasts	Endocardial/lymphatic EC	2.15657e-05	0	Rejection
COLLAGEN	COL6A1	ITGA1_ITGB1	Fibroblasts	Endocardial/lymphatic EC	1.73608e-05	0	3-month protocol
COLLAGEN	COL6A1	ITGA1_ITGB1	Fibroblasts	Endothelial cells (baboon)	6.13804e-06	0	3-month protocol
COLLAGEN	COL6A1	ITGA1_ITGB1	Fibroblasts	Mural cells	1.36395e-05	0	Rejection
COLLAGEN	COL6A1	ITGA1_ITGB1	Fibroblasts	Mural cells	1.73608e-05	0	3-month protocol
COLLAGEN	COL6A1	ITGA1_ITGB1	Fibroblasts	Neuronal cells	6.81978e-06	0	Rejection
COLLAGEN	COL6A1	ITGA1_ITGB1	Fibroblasts	Neuronal cells	1.50349e-05	0	3-month protocol
COLLAGEN	COL6A1	ITGA1_ITGB1	Fibroblasts	Vascular EC	1.0783e-05	0	Rejection
COLLAGEN	COL6A1	ITGA1_ITGB1	Fibroblasts	Vascular EC	1.73608e-05	0	3-month protocol
COLLAGEN	COL6A1	ITGA2_ITGB1	Fibroblasts	Vascular EC	4.82232e-06	0	Rejection
COLLAGEN	COL6A1	ITGA9_ITGB1	Fibroblasts	CM	4.82232e-06	0	Rejection
COLLAGEN	COL6A1	ITGA9_ITGB1	Fibroblasts	Endocardial/lymphatic EC	2.89332e-05	0	Rejection
COLLAGEN	COL6A1	ITGA9_ITGB1	Fibroblasts	Endocardial/lymphatic EC	2.6041e-05	0	3-month protocol
COLLAGEN	COL6A1	ITGA9_ITGB1	Fibroblasts	Endothelial cells (baboon)	1.06314e-05	0	3-month protocol
COLLAGEN	COL6A1	ITGA9_ITGB1	Fibroblasts	Vascular EC	4.82232e-06	0	Rejection
COLLAGEN	COL6A1	ITGA9_ITGB1	Fibroblasts	Vascular EC	8.68048e-06	0	3-month protocol
COLLAGEN	COL6A1	ITGAV_ITGB8	Fibroblasts	CM	1.0783e-05	0	Rejection
COLLAGEN	COL6A1	ITGAV_ITGB8	Fibroblasts	CM	1.73608e-05	0	3-month protocol
COLLAGEN	COL6A1	ITGAV_ITGB8	Fibroblasts	Neuronal cells	6.37932e-06	0	Rejection
COLLAGEN	COL6A2	CD44	Fibroblasts	CM	4.82232e-06	0	Rejection
COLLAGEN	COL6A2	CD44	Fibroblasts	Endothelial cells (baboon)	4.82232e-06	0	Rejection
COLLAGEN	COL6A2	CD44	Fibroblasts	Lymphoids (baboon)	4.82232e-06	0	Rejection
COLLAGEN	COL6A2	CD44	Fibroblasts	Lymphoids (baboon)	8.68048e-06	0	3-month protocol
COLLAGEN	COL6A2	CD44	Fibroblasts	Mast cells (baboon)	4.82232e-06	0	Rejection
COLLAGEN	COL6A2	CD44	Fibroblasts	Mast cells (baboon)	2.17013e-06	0	3-month protocol
COLLAGEN	COL6A2	CD44	Fibroblasts	Myeloids (baboon)	4.82232e-06	0	Rejection
COLLAGEN	COL6A2	CD44	Fibroblasts	Myeloids (baboon)	8.68048e-06	0	3-month protocol
COLLAGEN	COL6A2	CD44	Fibroblasts	Neuronal cells	2.41117e-06	0	Rejection
COLLAGEN	COL6A2	CD44	Fibroblasts	Resident Immune	4.82232e-06	0	Rejection
COLLAGEN	COL6A2	ITGA11_ITGB1	Fibroblasts	Fibroblasts	9.6446e-06	0	Rejection
COLLAGEN	COL6A2	ITGA1_ITGB1	Fibroblasts	Endocardial/lymphatic EC	2.15657e-05	0	Rejection
COLLAGEN	COL6A2	ITGA1_ITGB1	Fibroblasts	Endocardial/lymphatic EC	1.73608e-05	0	3-month protocol
COLLAGEN	COL6A2	ITGA1_ITGB1	Fibroblasts	Endothelial cells (baboon)	6.13804e-06	0	3-month protocol
COLLAGEN	COL6A2	ITGA1_ITGB1	Fibroblasts	Mural cells	1.36395e-05	0	Rejection
COLLAGEN	COL6A2	ITGA1_ITGB1	Fibroblasts	Mural cells	1.73608e-05	0	3-month protocol
COLLAGEN	COL6A2	ITGA1_ITGB1	Fibroblasts	Neuronal cells	6.81978e-06	0	Rejection
COLLAGEN	COL6A2	ITGA1_ITGB1	Fibroblasts	Neuronal cells	1.50349e-05	0	3-month protocol
COLLAGEN	COL6A2	ITGA1_ITGB1	Fibroblasts	Vascular EC	1.0783e-05	0	Rejection
COLLAGEN	COL6A2	ITGA1_ITGB1	Fibroblasts	Vascular EC	1.73608e-05	0	3-month protocol
COLLAGEN	COL6A2	ITGA2_ITGB1	Fibroblasts	Vascular EC	4.82232e-06	0	Rejection
COLLAGEN	COL6A2	ITGA9_ITGB1	Fibroblasts	CM	4.82232e-06	0	Rejection
COLLAGEN	COL6A2	ITGA9_ITGB1	Fibroblasts	Endocardial/lymphatic EC	2.89332e-05	0	Rejection
COLLAGEN	COL6A2	ITGA9_ITGB1	Fibroblasts	Endocardial/lymphatic EC	2.6041e-05	0	3-month protocol
COLLAGEN	COL6A2	ITGA9_ITGB1	Fibroblasts	Endothelial cells (baboon)	1.06314e-05	0	3-month protocol
COLLAGEN	COL6A2	ITGA9_ITGB1	Fibroblasts	Vascular EC	4.82232e-06	0	Rejection
COLLAGEN	COL6A2	ITGA9_ITGB1	Fibroblasts	Vascular EC	8.68048e-06	0	3-month protocol
COLLAGEN	COL6A2	ITGAV_ITGB8	Fibroblasts	CM	1.0783e-05	0	Rejection
COLLAGEN	COL6A2	ITGAV_ITGB8	Fibroblasts	CM	1.73608e-05	0	3-month protocol
COLLAGEN	COL6A2	ITGAV_ITGB8	Fibroblasts	Neuronal cells	6.37932e-06	0	Rejection
COLLAGEN	COL6A3	CD44	Fibroblasts	CM	3.85773e-05	0	Rejection
COLLAGEN	COL6A3	CD44	Fibroblasts	Endothelial cells (baboon)	3.85773e-05	0	Rejection
COLLAGEN	COL6A3	CD44	Fibroblasts	Lymphoids (baboon)	3.85773e-05	0	Rejection
COLLAGEN	COL6A3	CD44	Fibroblasts	Lymphoids (baboon)	3.4721e-05	0	3-month protocol
COLLAGEN	COL6A3	CD44	Fibroblasts	Mast cells (baboon)	3.85773e-05	0	Rejection
COLLAGEN	COL6A3	CD44	Fibroblasts	Mast cells (baboon)	8.68048e-06	0	3-month protocol
COLLAGEN	COL6A3	CD44	Fibroblasts	Myeloids (baboon)	3.85773e-05	0	Rejection
COLLAGEN	COL6A3	CD44	Fibroblasts	Myeloids (baboon)	3.4721e-05	0	3-month protocol
COLLAGEN	COL6A3	CD44	Fibroblasts	Neuronal cells	1.9289e-05	0	Rejection
COLLAGEN	COL6A3	CD44	Fibroblasts	Resident Immune	3.85773e-05	0	Rejection
COLLAGEN	COL6A3	CD44	Mural cells	CM	4.82232e-06	0	Rejection
COLLAGEN	COL6A3	CD44	Mural cells	Endothelial cells (baboon)	4.82232e-06	0	Rejection
COLLAGEN	COL6A3	CD44	Mural cells	Lymphoids (baboon)	4.82232e-06	0	Rejection
COLLAGEN	COL6A3	CD44	Mural cells	Mast cells (baboon)	4.82232e-06	0	Rejection
COLLAGEN	COL6A3	CD44	Mural cells	Myeloids (baboon)	4.82232e-06	0	Rejection
COLLAGEN	COL6A3	CD44	Mural cells	Neuronal cells	2.41117e-06	0	Rejection
COLLAGEN	COL6A3	CD44	Mural cells	Resident Immune	4.82232e-06	0	Rejection
COLLAGEN	COL6A3	ITGA11_ITGB1	Fibroblasts	Fibroblasts	7.71516e-05	0	Rejection
COLLAGEN	COL6A3	ITGA11_ITGB1	Mural cells	Fibroblasts	9.6446e-06	0	Rejection
COLLAGEN	COL6A3	ITGA1_ITGB1	Fibroblasts	Endocardial/lymphatic EC	0.0001725	0	Rejection
COLLAGEN	COL6A3	ITGA1_ITGB1	Fibroblasts	Endocardial/lymphatic EC	6.94396e-05	0	3-month protocol
COLLAGEN	COL6A3	ITGA1_ITGB1	Fibroblasts	Endothelial cells (baboon)	2.45517e-05	0	3-month protocol
COLLAGEN	COL6A3	ITGA1_ITGB1	Fibroblasts	Mural cells	0.000109105	0	Rejection
COLLAGEN	COL6A3	ITGA1_ITGB1	Fibroblasts	Mural cells	6.94396e-05	0	3-month protocol
COLLAGEN	COL6A3	ITGA1_ITGB1	Fibroblasts	Neuronal cells	5.45556e-05	0	Rejection
COLLAGEN	COL6A3	ITGA1_ITGB1	Fibroblasts	Neuronal cells	6.0137e-05	0	3-month protocol
COLLAGEN	COL6A3	ITGA1_ITGB1	Fibroblasts	Vascular EC	8.62573e-05	0	Rejection
COLLAGEN	COL6A3	ITGA1_ITGB1	Fibroblasts	Vascular EC	6.94396e-05	0	3-month protocol
COLLAGEN	COL6A3	ITGA1_ITGB1	Mural cells	Endocardial/lymphatic EC	2.15657e-05	0	Rejection
COLLAGEN	COL6A3	ITGA1_ITGB1	Mural cells	Mural cells	1.36395e-05	0	Rejection
COLLAGEN	COL6A3	ITGA1_ITGB1	Mural cells	Neuronal cells	6.81978e-06	0	Rejection
COLLAGEN	COL6A3	ITGA1_ITGB1	Mural cells	Vascular EC	1.0783e-05	0	Rejection
COLLAGEN	COL6A3	ITGA2_ITGB1	Fibroblasts	Vascular EC	3.85773e-05	0	Rejection
COLLAGEN	COL6A3	ITGA2_ITGB1	Mural cells	Vascular EC	4.82232e-06	0	Rejection
COLLAGEN	COL6A3	ITGA9_ITGB1	Fibroblasts	CM	3.85773e-05	0	Rejection
COLLAGEN	COL6A3	ITGA9_ITGB1	Fibroblasts	Endocardial/lymphatic EC	0.000231419	0	Rejection
COLLAGEN	COL6A3	ITGA9_ITGB1	Fibroblasts	Endocardial/lymphatic EC	0.000104156	0	3-month protocol
COLLAGEN	COL6A3	ITGA9_ITGB1	Fibroblasts	Endothelial cells (baboon)	4.25241e-05	0	3-month protocol
COLLAGEN	COL6A3	ITGA9_ITGB1	Fibroblasts	Vascular EC	3.85773e-05	0	Rejection
COLLAGEN	COL6A3	ITGA9_ITGB1	Fibroblasts	Vascular EC	3.4721e-05	0	3-month protocol
COLLAGEN	COL6A3	ITGA9_ITGB1	Mural cells	CM	4.82232e-06	0	Rejection
COLLAGEN	COL6A3	ITGA9_ITGB1	Mural cells	Endocardial/lymphatic EC	2.89332e-05	0	Rejection
COLLAGEN	COL6A3	ITGA9_ITGB1	Mural cells	Vascular EC	4.82232e-06	0	Rejection
COLLAGEN	COL6A3	ITGAV_ITGB8	Fibroblasts	CM	8.62573e-05	0	Rejection
COLLAGEN	COL6A3	ITGAV_ITGB8	Fibroblasts	CM	6.94396e-05	0	3-month protocol
COLLAGEN	COL6A3	ITGAV_ITGB8	Fibroblasts	Neuronal cells	5.10323e-05	0	Rejection
COLLAGEN	COL6A3	ITGAV_ITGB8	Mural cells	CM	1.0783e-05	0	Rejection
COLLAGEN	COL6A3	ITGAV_ITGB8	Mural cells	Neuronal cells	6.37932e-06	0	Rejection
COLLAGEN	COL6A6	CD44	Fibroblasts	Lymphoids (baboon)	8.68048e-06	0	3-month protocol
COLLAGEN	COL6A6	CD44	Fibroblasts	Mast cells (baboon)	2.17013e-06	0	3-month protocol
COLLAGEN	COL6A6	CD44	Fibroblasts	Myeloids (baboon)	8.68048e-06	0	3-month protocol
COLLAGEN	COL6A6	ITGA1_ITGB1	Fibroblasts	Endocardial/lymphatic EC	1.73608e-05	0	3-month protocol
COLLAGEN	COL6A6	ITGA1_ITGB1	Fibroblasts	Endothelial cells (baboon)	6.13804e-06	0	3-month protocol
COLLAGEN	COL6A6	ITGA1_ITGB1	Fibroblasts	Mural cells	1.73608e-05	0	3-month protocol
COLLAGEN	COL6A6	ITGA1_ITGB1	Fibroblasts	Neuronal cells	1.50349e-05	0	3-month protocol
COLLAGEN	COL6A6	ITGA1_ITGB1	Fibroblasts	Vascular EC	1.73608e-05	0	3-month protocol
COLLAGEN	COL6A6	ITGA9_ITGB1	Fibroblasts	Endocardial/lymphatic EC	2.6041e-05	0	3-month protocol
COLLAGEN	COL6A6	ITGA9_ITGB1	Fibroblasts	Endothelial cells (baboon)	1.06314e-05	0	3-month protocol
COLLAGEN	COL6A6	ITGA9_ITGB1	Fibroblasts	Vascular EC	8.68048e-06	0	3-month protocol
COLLAGEN	COL6A6	ITGAV_ITGB8	Fibroblasts	CM	1.73608e-05	0	3-month protocol

[truncated: 30 more sheets: CSF, EPHA, EPHB, ESAM, FGF, FN1, GHRELIN, HSPG, IGF, JAM, KIT, LAMININ, MPZ, NCAM, PECAM1, PROS, PTPRM, SEMA3, SEMA6, TENASCIN …]
