# Supplementary material for: Integrated Molecular Profiling of Preclinical and Clinical Cardiac Xenotransplants
Source: Research Square preprint supplement (doi:10.21203/rs.3.rs-8406985/v1), 2026-02-04
Supplement: Supplementary file 33 [file c1aa81aec6b13ddc1b413261.xlsx]

## Sheet: Sheet1
name	contribution_3_month_protocol	contribution_Rejection	pvalues_3_month_protocol	pvalues_Rejection
VEGF	0	0.000119106	0	0
VISFATIN	0	6.50996e-05	0	0
HSPG	0	6.02783e-05	0	0
GHRELIN	0	2.89337e-05	0	0
CCL	0	1.92893e-05	0	0
MPZ	0	1.92893e-05	0	0
TGFb	0	9.41211e-06	0	0
PROS	0	4.82232e-06	0	0
FN1	8.0294e-05	0.00131589	3.03041e-07	3.03041e-07
KIT	1.7361e-05	0.000159132	0.03125	0.03125
CADM	4.34025e-05	0.000369176	0.28703	0.28703
NCAM	0.000451337	0.00190885	0.09375	0.09375
BMP	0.00041665	0.00136339	0.00146484	0.00146484
CSF	1.7361e-05	5.3045e-05	0.141116	0.141116
SEMA6	0.000520775	0.00124867	0.0273438	0.0273438
CDH5	8.68048e-06	1.92893e-05	0.185877	0.185877
ANGPT	5.20824e-05	9.62078e-05	0.082531	0.082531
APP	0.000683519	0.00125955	0.066317	0.066317
CD45	0.0013669	0.00248743	0.0384903	0.0384903
COLLAGEN	0.00582337	0.00910452	0.00188494	0.00188494
PDGF	0.000555486	0.000813714	0.0742188	0.0742188
PTPRM	0.03118	0.0406882	0.00145615	0.00145615
SEMA3	0.00126305	0.00150403	0.219631	0.219631
LAMININ	0.0082326	0.00968032	0.138389	0.138389
FGF	0.000121525	0.000135023	0.837525	0.837525
IGF	0.000676945	0.000770424	0.627801	0.627801
EPHA	0.00028642	0.000270036	0.843264	0.843264
TENASCIN	0.000125427	9.87197e-05	0.623639	0.623639
PECAM1	0.00195265	0.00164863	0.17017	0.17017
ESAM	8.68048e-06	4.82232e-06	0	0
JAM	8.68048e-06	4.82232e-06	0	0
NEGR	8.68048e-06	4.82232e-06	0	0
NGL	8.68048e-06	4.82232e-06	0	0
NRG	0.000726637	0.000409731	0	0
THBS	0.000833198	0.000472528	0.366432	0.366432
NRXN	0.000104156	5.3043e-05	0	0
CDH	0.0117441	0.00587268	0	0
CD99	2.17013e-06	0	0	0
EPHB	1.30207e-05	0	0	0
NOTCH	0.000119357	0	0	0
