# Supplementary material for: Integrated Molecular Profiling of Preclinical and Clinical Cardiac Xenotransplants
Source: Research Square preprint supplement (doi:10.21203/rs.3.rs-8406985/v1), 2026-02-04
Supplement: Supplementary file 34 [file c3b3e131e03487edd0bbfc70.xlsx]

## Sheet: CM
Major_Cell_type	Cell_State	Comparison	Group1	Group2	Group1_Mean_Proportion	Group2_Mean_Proportion	Fold_Change	log2FC	PValue	FDR
CM	Hypoxia_vCM	Control vs 3-month protocol	Control	3-month protocol	18.5912	17.7041	1.05011	0.0705353	0.395178	0.55325
CM	Hypoxia_vCM	6-month protocol vs 3-month protocol	6-month protocol	3-month protocol	36.6912	17.7041	2.07247	1.05135	7.27156e-05	0.000509009
CM	Hypoxia_vCM	Prematurely terminated vs 3-month protocol	Prematurely terminated	3-month protocol	15.663	17.7041	0.884711	-0.176722	0.0867453	0.202406
CM	Hypoxia_vCM	PCMV/PRV vs 3-month protocol	PCMV/PRV	3-month protocol	24.8234	17.7041	1.40213	0.487619	0.321269	0.449777
CM	Hypoxia_vCM	Rejection vs 3-month protocol	Rejection	3-month protocol	27.8206	17.7041	1.57143	0.652075	0.143866	0.335687
CM	Prolif_vCM	Control vs 3-month protocol	Control	3-month protocol	0.35294	0.569543	0.61969	-0.690382	0.0427148	0.106553
CM	Prolif_vCM	6-month protocol vs 3-month protocol	6-month protocol	3-month protocol	0.673535	0.569543	1.18259	0.241948	0.946336	0.946336
CM	Prolif_vCM	Prematurely terminated vs 3-month protocol	Prematurely terminated	3-month protocol	0.695685	0.569543	1.22148	0.28863	0.99746	0.99746
CM	Prolif_vCM	PCMV/PRV vs 3-month protocol	PCMV/PRV	3-month protocol	0.732518	0.569543	1.28615	0.36306	0.431637	0.503576
CM	Prolif_vCM	Rejection vs 3-month protocol	Rejection	3-month protocol	0.427589	0.569543	0.750759	-0.413578	0.12302	0.335687
CM	vCM1	Control vs 3-month protocol	Control	3-month protocol	49.5819	42.2227	1.17429	0.231792	0.0608875	0.106553
CM	vCM1	6-month protocol vs 3-month protocol	6-month protocol	3-month protocol	27.7099	42.2227	0.656278	-0.607621	0.504862	0.706807
CM	vCM1	Prematurely terminated vs 3-month protocol	Prematurely terminated	3-month protocol	36.8228	42.2227	0.872108	-0.197422	0.0494401	0.17304
CM	vCM1	PCMV/PRV vs 3-month protocol	PCMV/PRV	3-month protocol	25.1725	42.2227	0.596184	-0.746171	0.000633383	0.00443368
CM	vCM1	Rejection vs 3-month protocol	Rejection	3-month protocol	32.5363	42.2227	0.770588	-0.375969	0.0982954	0.335687
CM	vCM2_ISG	Control vs 3-month protocol	Control	3-month protocol	15.5024	17.4186	0.889992	-0.168135	0.77065	0.77065
CM	vCM2_ISG	6-month protocol vs 3-month protocol	6-month protocol	3-month protocol	21.2537	17.4186	1.22017	0.287088	0.0801233	0.186954
CM	vCM2_ISG	Prematurely terminated vs 3-month protocol	Prematurely terminated	3-month protocol	24.5115	17.4186	1.40721	0.492836	0.448001	0.627201
CM	vCM2_ISG	PCMV/PRV vs 3-month protocol	PCMV/PRV	3-month protocol	31.4448	17.4186	1.80525	0.852198	0.0184317	0.0645109
CM	vCM2_ISG	Rejection vs 3-month protocol	Rejection	3-month protocol	18.6557	17.4186	1.07103	0.0989935	0.563926	0.667323
CM	vCM3	Control vs 3-month protocol	Control	3-month protocol	13.6622	20.3996	0.669728	-0.578352	0.0567629	0.106553
CM	vCM3	6-month protocol vs 3-month protocol	6-month protocol	3-month protocol	12.8665	20.3996	0.630722	-0.664923	0.497143	0.706807
CM	vCM3	Prematurely terminated vs 3-month protocol	Prematurely terminated	3-month protocol	19.008	20.3996	0.931784	-0.101932	0.236614	0.414075
CM	vCM3	PCMV/PRV vs 3-month protocol	PCMV/PRV	3-month protocol	15.6635	20.3996	0.767834	-0.381133	0.0557753	0.130142
CM	vCM3	Rejection vs 3-month protocol	Rejection	3-month protocol	17.8196	20.3996	0.87353	-0.195071	0.499581	0.667323
CM	vCM4	Control vs 3-month protocol	Control	3-month protocol	1.89375	0.924708	2.04794	1.03418	0.0145285	0.1017
CM	vCM4	6-month protocol vs 3-month protocol	6-month protocol	3-month protocol	0.69203	0.924708	0.748376	-0.418165	0.834196	0.946336
CM	vCM4	Prematurely terminated vs 3-month protocol	Prematurely terminated	3-month protocol	2.46013	0.924708	2.66044	1.41167	0.0247119	0.172983
CM	vCM4	PCMV/PRV vs 3-month protocol	PCMV/PRV	3-month protocol	1.427	0.924708	1.54319	0.625914	0.185578	0.324762
CM	vCM4	Rejection vs 3-month protocol	Rejection	3-month protocol	1.42166	0.924708	1.53742	0.620507	0.903282	0.903282
CM	vCM5	Control vs 3-month protocol	Control	3-month protocol	0.415748	0.760814	0.546451	-0.871836	0.549937	0.641593
CM	vCM5	6-month protocol vs 3-month protocol	6-month protocol	3-month protocol	0.113227	0.760814	0.148824	-2.74832	0.0184049	0.0644173
CM	vCM5	Prematurely terminated vs 3-month protocol	Prematurely terminated	3-month protocol	0.838884	0.760814	1.10261	0.140927	0.944381	0.99746
CM	vCM5	PCMV/PRV vs 3-month protocol	PCMV/PRV	3-month protocol	0.736253	0.760814	0.967717	-0.0473424	0.987062	0.987062
CM	vCM5	Rejection vs 3-month protocol	Rejection	3-month protocol	1.31843	0.760814	1.73292	0.793203	0.571991	0.667323

## Sheet: FB
Major_Cell_type	Cell_State	Comparison	Group1	Group2	Group1_Mean_Proportion	Group2_Mean_Proportion	Fold_Change	log2FC	PValue	FDR
Fibroblasts	Homeostatic_vFB	Control vs 3-month protocol	Control	3-month protocol	53.273	52.3824	1.017	0.0243211	0.171792	0.190879
Fibroblasts	Homeostatic_vFB	6-month protocol vs 3-month protocol	6-month protocol	3-month protocol	21.5447	52.3824	0.411297	-1.28175	0.00617354	0.0617354
Fibroblasts	Homeostatic_vFB	Prematurely terminated vs 3-month protocol	Prematurely terminated	3-month protocol	30.5365	52.3824	0.582952	-0.778551	0.0287188	0.105271
Fibroblasts	Homeostatic_vFB	PCMV/PRV vs 3-month protocol	PCMV/PRV	3-month protocol	15.6755	52.3824	0.299251	-1.74057	0.000413179	0.00413179
Fibroblasts	Homeostatic_vFB	Rejection vs 3-month protocol	Rejection	3-month protocol	25.5588	52.3824	0.487928	-1.03526	0.001255	0.00978798
Fibroblasts	Hypoxia_vFB	Control vs 3-month protocol	Control	3-month protocol	0.256586	2.91926	0.0878943	-3.50809	0.130753	0.18679
Fibroblasts	Hypoxia_vFB	6-month protocol vs 3-month protocol	6-month protocol	3-month protocol	15.523	2.91926	5.31744	2.41073	0.0176015	0.0880075
Fibroblasts	Hypoxia_vFB	Prematurely terminated vs 3-month protocol	Prematurely terminated	3-month protocol	5.03573	2.91926	1.725	0.7866	0.413975	0.517468
Fibroblasts	Hypoxia_vFB	PCMV/PRV vs 3-month protocol	PCMV/PRV	3-month protocol	9.2948	2.91926	3.18396	1.67082	0.0421214	0.105303
Fibroblasts	Hypoxia_vFB	Rejection vs 3-month protocol	Rejection	3-month protocol	10.5093	2.91926	3.6	1.848	0.0638069	0.159517
Fibroblasts	Myo_vFB	Control vs 3-month protocol	Control	3-month protocol	0.492034	7.92255	0.0621056	-4.00913	0.0100701	0.033567
Fibroblasts	Myo_vFB	6-month protocol vs 3-month protocol	6-month protocol	3-month protocol	18.6232	7.92255	2.35065	1.23306	0.311479	0.519131
Fibroblasts	Myo_vFB	Prematurely terminated vs 3-month protocol	Prematurely terminated	3-month protocol	18.3901	7.92255	2.32124	1.2149	0.308299	0.505907
Fibroblasts	Myo_vFB	PCMV/PRV vs 3-month protocol	PCMV/PRV	3-month protocol	18.3705	7.92255	2.31876	1.21335	0.217578	0.271972
Fibroblasts	Myo_vFB	Rejection vs 3-month protocol	Rejection	3-month protocol	18.5172	7.92255	2.33728	1.22483	0.149739	0.249566
Fibroblasts	Prolif_vFB	Control vs 3-month protocol	Control	3-month protocol	0.50843	0.67904	0.748748	-0.417447	0.0321283	0.0803207
Fibroblasts	Prolif_vFB	6-month protocol vs 3-month protocol	6-month protocol	3-month protocol	3.6438	0.67904	5.36611	2.42388	0.177917	0.444792
Fibroblasts	Prolif_vFB	Prematurely terminated vs 3-month protocol	Prematurely terminated	3-month protocol	3.49654	0.67904	5.14924	2.36436	0.0123502	0.105271
Fibroblasts	Prolif_vFB	PCMV/PRV vs 3-month protocol	PCMV/PRV	3-month protocol	1.48714	0.67904	2.19007	1.13098	0.207427	0.271972
Fibroblasts	Prolif_vFB	Rejection vs 3-month protocol	Rejection	3-month protocol	3.79333	0.67904	5.58631	2.48189	0.0019576	0.00978798
Fibroblasts	vFB3	Control vs 3-month protocol	Control	3-month protocol	10.7523	8.81903	1.21921	0.285951	0.110795	0.184659
Fibroblasts	vFB3	6-month protocol vs 3-month protocol	6-month protocol	3-month protocol	12.2284	8.81903	1.38659	0.471542	0.708342	0.787047
Fibroblasts	vFB3	Prematurely terminated vs 3-month protocol	Prematurely terminated	3-month protocol	6.77509	8.81903	0.768236	-0.380379	0.493853	0.548726
Fibroblasts	vFB3	PCMV/PRV vs 3-month protocol	PCMV/PRV	3-month protocol	5.52722	8.81903	0.626738	-0.674065	0.1172	0.234399
Fibroblasts	vFB3	Rejection vs 3-month protocol	Rejection	3-month protocol	10.6593	8.81903	1.20867	0.273424	0.975764	0.975764
Fibroblasts	vFB4	Control vs 3-month protocol	Control	3-month protocol	12.1119	7.71405	1.57011	0.650864	0.0421389	0.0842778
Fibroblasts	vFB4	6-month protocol vs 3-month protocol	6-month protocol	3-month protocol	5.84503	7.71405	0.757712	-0.400278	0.29794	0.519131
Fibroblasts	vFB4	Prematurely terminated vs 3-month protocol	Prematurely terminated	3-month protocol	9.58957	7.71405	1.24313	0.313978	0.899027	0.899027
Fibroblasts	vFB4	PCMV/PRV vs 3-month protocol	PCMV/PRV	3-month protocol	21.4219	7.71405	2.77699	1.47352	0.208895	0.271972
Fibroblasts	vFB4	Rejection vs 3-month protocol	Rejection	3-month protocol	8.64986	7.71405	1.12131	0.165187	0.803149	0.892387
Fibroblasts	vFB5	Control vs 3-month protocol	Control	3-month protocol	17.9373	7.31398	2.45247	1.29424	0.00117845	0.0117845
Fibroblasts	vFB5	6-month protocol vs 3-month protocol	6-month protocol	3-month protocol	4.14971	7.31398	0.567366	-0.817647	0.0493502	0.164501
Fibroblasts	vFB5	Prematurely terminated vs 3-month protocol	Prematurely terminated	3-month protocol	15.1718	7.31398	2.07435	1.05266	0.141356	0.282712
Fibroblasts	vFB5	PCMV/PRV vs 3-month protocol	PCMV/PRV	3-month protocol	3.22557	7.31398	0.441015	-1.1811	0.0110705	0.0553524
Fibroblasts	vFB5	Rejection vs 3-month protocol	Rejection	3-month protocol	4.41354	7.31398	0.603439	-0.72872	0.0158647	0.0528824
Fibroblasts	vFB6	Control vs 3-month protocol	Control	3-month protocol	0.186217	4.54479	0.0409738	-4.60915	0.163649	0.190879
Fibroblasts	vFB6	6-month protocol vs 3-month protocol	6-month protocol	3-month protocol	4.90109	4.54479	1.0784	0.108889	0.643365	0.787047
Fibroblasts	vFB6	Prematurely terminated vs 3-month protocol	Prematurely terminated	3-month protocol	7.86063	4.54479	1.72959	0.790432	0.354135	0.505907
Fibroblasts	vFB6	PCMV/PRV vs 3-month protocol	PCMV/PRV	3-month protocol	7.38125	4.54479	1.62411	0.699651	0.937697	0.937697
Fibroblasts	vFB6	Rejection vs 3-month protocol	Rejection	3-month protocol	8.40011	4.54479	1.84829	0.886194	0.324542	0.450845
Fibroblasts	vFB8	Control vs 3-month protocol	Control	3-month protocol	3.89847	4.10209	0.950362	-0.0734511	0.598212	0.598212
Fibroblasts	vFB8	6-month protocol vs 3-month protocol	6-month protocol	3-month protocol	6.67528	4.10209	1.62729	0.70247	0.825993	0.825993
Fibroblasts	vFB8	Prematurely terminated vs 3-month protocol	Prematurely terminated	3-month protocol	1.89167	4.10209	0.461149	-1.1167	0.0315812	0.105271
Fibroblasts	vFB8	PCMV/PRV vs 3-month protocol	PCMV/PRV	3-month protocol	2.12967	4.10209	0.519166	-0.945731	0.365623	0.406247
Fibroblasts	vFB8	Rejection vs 3-month protocol	Rejection	3-month protocol	3.77932	4.10209	0.921316	-0.118232	0.127453	0.249566
Fibroblasts	vFB_ISG	Control vs 3-month protocol	Control	3-month protocol	0.583767	3.60277	0.162033	-2.62564	0.00753997	0.033567
Fibroblasts	vFB_ISG	6-month protocol vs 3-month protocol	6-month protocol	3-month protocol	6.86584	3.60277	1.90571	0.930328	0.664224	0.787047
Fibroblasts	vFB_ISG	Prematurely terminated vs 3-month protocol	Prematurely terminated	3-month protocol	1.25239	3.60277	0.347618	-1.52443	0.0463313	0.115828
Fibroblasts	vFB_ISG	PCMV/PRV vs 3-month protocol	PCMV/PRV	3-month protocol	15.4865	3.60277	4.29848	2.10383	0.036748	0.105303
Fibroblasts	vFB_ISG	Rejection vs 3-month protocol	Rejection	3-month protocol	5.71917	3.60277	1.58743	0.666697	0.360676	0.450845

## Sheet: Lymph_papio
Major_Cell_type	Cell_State	Comparison	Group1	Group2	Group1_Mean_Proportion	Group2_Mean_Proportion	Fold_Change	log2FC	PValue	FDR
Lymphoids (baboon)	CD4T_act_papio	6-month protocol vs 3-month protocol	6-month protocol	3-month protocol	3.4047	5.87759	0.579268	-0.787697	0.449477	0.810791
Lymphoids (baboon)	CD4T_act_papio	Prematurely terminated vs 3-month protocol	Prematurely terminated	3-month protocol	4.34783	5.87759	0.739729	-0.43493	0.550212	0.857065
Lymphoids (baboon)	CD4T_act_papio	PCMV/PRV vs 3-month protocol	PCMV/PRV	3-month protocol	5.29101	5.87759	0.9002	-0.151683	0.686679	0.94569
Lymphoids (baboon)	CD4T_act_papio	Rejection vs 3-month protocol	Rejection	3-month protocol	16.9249	5.87759	2.87957	1.52585	0.0824335	0.374883
Lymphoids (baboon)	CD4T_naive_papio	6-month protocol vs 3-month protocol	6-month protocol	3-month protocol	6.70949	7.66559	0.875274	-0.192194	0.562311	0.810791
Lymphoids (baboon)	CD4T_naive_papio	Prematurely terminated vs 3-month protocol	Prematurely terminated	3-month protocol	35.2437	7.66559	4.59766	2.2009	0.220899	0.809965
Lymphoids (baboon)	CD4T_naive_papio	PCMV/PRV vs 3-month protocol	PCMV/PRV	3-month protocol	11.1111	7.66559	1.44948	0.535535	0.174607	0.94569
Lymphoids (baboon)	CD4T_naive_papio	Rejection vs 3-month protocol	Rejection	3-month protocol	5.66607	7.66559	0.739156	-0.436049	0.754373	0.787111
Lymphoids (baboon)	CD4T_reg_papio	6-month protocol vs 3-month protocol	6-month protocol	3-month protocol	5.14163	6.59975	0.779065	-0.360185	0.898151	0.952939
Lymphoids (baboon)	CD4T_reg_papio	Prematurely terminated vs 3-month protocol	Prematurely terminated	3-month protocol	5.27009	6.59975	0.798529	-0.324583	0.1458	0.801903
Lymphoids (baboon)	CD4T_reg_papio	PCMV/PRV vs 3-month protocol	PCMV/PRV	3-month protocol	0	6.59975	1.51521e-07	-22.654	0.807389	0.94569
Lymphoids (baboon)	CD4T_reg_papio	Rejection vs 3-month protocol	Rejection	3-month protocol	6.71789	6.59975	1.0179	0.0255965	0.473517	0.744098
Lymphoids (baboon)	CD8T_cytox_papio	6-month protocol vs 3-month protocol	6-month protocol	3-month protocol	6.44488	6.29859	1.02323	0.0331246	0.952939	0.952939
Lymphoids (baboon)	CD8T_cytox_papio	Prematurely terminated vs 3-month protocol	Prematurely terminated	3-month protocol	1.44928	6.29859	0.230095	-2.1197	0.633343	0.857065
Lymphoids (baboon)	CD8T_cytox_papio	PCMV/PRV vs 3-month protocol	PCMV/PRV	3-month protocol	1.5873	6.29859	0.252009	-1.98845	0.475142	0.94569
Lymphoids (baboon)	CD8T_cytox_papio	Rejection vs 3-month protocol	Rejection	3-month protocol	11.9075	6.29859	1.8905	0.918768	0.586488	0.763984
Lymphoids (baboon)	CD8T_reg_papio	6-month protocol vs 3-month protocol	6-month protocol	3-month protocol	20.0681	15.9362	1.25928	0.332599	0.58536	0.810791
Lymphoids (baboon)	CD8T_reg_papio	Prematurely terminated vs 3-month protocol	Prematurely terminated	3-month protocol	9.42029	15.9362	0.591127	-0.75846	0.0983061	0.801903
Lymphoids (baboon)	CD8T_reg_papio	PCMV/PRV vs 3-month protocol	PCMV/PRV	3-month protocol	4.7619	15.9362	0.298811	-1.74269	0.0472838	0.520121
Lymphoids (baboon)	CD8T_reg_papio	Rejection vs 3-month protocol	Rejection	3-month protocol	12.004	15.9362	0.753256	-0.408789	0.0913666	0.374883
Lymphoids (baboon)	MAIT-like_papio	6-month protocol vs 3-month protocol	6-month protocol	3-month protocol	3.38164	2.26756	1.49131	0.576582	0.205836	0.754732
Lymphoids (baboon)	MAIT-like_papio	Prematurely terminated vs 3-month protocol	Prematurely terminated	3-month protocol	1.44928	2.26756	0.639134	-0.645811	0.652193	0.857065
Lymphoids (baboon)	MAIT-like_papio	PCMV/PRV vs 3-month protocol	PCMV/PRV	3-month protocol	0	2.26756	4.41002e-07	-21.1127	0.324933	0.94569
Lymphoids (baboon)	MAIT-like_papio	Rejection vs 3-month protocol	Rejection	3-month protocol	3.74842	2.26756	1.65306	0.725142	0.625078	0.763984
Lymphoids (baboon)	NK_CD16hi_papio	6-month protocol vs 3-month protocol	6-month protocol	3-month protocol	27.993	20.1282	1.39073	0.475846	0.478146	0.810791
Lymphoids (baboon)	NK_CD16hi_papio	Prematurely terminated vs 3-month protocol	Prematurely terminated	3-month protocol	31.2253	20.1282	1.55132	0.633497	0.74056	0.857065
Lymphoids (baboon)	NK_CD16hi_papio	PCMV/PRV vs 3-month protocol	PCMV/PRV	3-month protocol	43.3862	20.1282	2.15549	1.10802	0.642011	0.94569
Lymphoids (baboon)	NK_CD16hi_papio	Rejection vs 3-month protocol	Rejection	3-month protocol	17.1181	20.1282	0.850455	-0.233693	0.443951	0.744098
Lymphoids (baboon)	NK_CD56hi_papio	6-month protocol vs 3-month protocol	6-month protocol	3-month protocol	11.3307	20.3014	0.558125	-0.84134	0.663374	0.810791
Lymphoids (baboon)	NK_CD56hi_papio	Prematurely terminated vs 3-month protocol	Prematurely terminated	3-month protocol	10.1449	20.3014	0.499716	-1.00082	0.77915	0.857065
Lymphoids (baboon)	NK_CD56hi_papio	PCMV/PRV vs 3-month protocol	PCMV/PRV	3-month protocol	17.4603	20.3014	0.860056	-0.217497	0.859718	0.94569
Lymphoids (baboon)	NK_CD56hi_papio	Rejection vs 3-month protocol	Rejection	3-month protocol	8.57562	20.3014	0.422416	-1.24326	0.375822	0.744098
Lymphoids (baboon)	Plasmacells_papio	6-month protocol vs 3-month protocol	6-month protocol	3-month protocol	0.976065	0.380241	2.56697	1.36006	0.204573	0.754732
Lymphoids (baboon)	Plasmacells_papio	Prematurely terminated vs 3-month protocol	Prematurely terminated	3-month protocol	0	0.380241	2.62991e-06	-18.5366	0.352087	0.857065
Lymphoids (baboon)	Plasmacells_papio	PCMV/PRV vs 3-month protocol	PCMV/PRV	3-month protocol	1.5873	0.380241	4.17447	2.06159	0.967968	0.967968
Lymphoids (baboon)	Plasmacells_papio	Rejection vs 3-month protocol	Rejection	3-month protocol	0.89097	0.380241	2.34317	1.22846	0.102241	0.374883
Lymphoids (baboon)	Prolif_lymphoids_papio	6-month protocol vs 3-month protocol	6-month protocol	3-month protocol	8.8845	5.08856	1.74598	0.804033	0.183859	0.754732
Lymphoids (baboon)	Prolif_lymphoids_papio	Prematurely terminated vs 3-month protocol	Prematurely terminated	3-month protocol	1.44928	5.08856	0.284811	-1.81192	0.918383	0.918383
Lymphoids (baboon)	Prolif_lymphoids_papio	PCMV/PRV vs 3-month protocol	PCMV/PRV	3-month protocol	7.40741	5.08856	1.4557	0.541712	0.687431	0.94569
Lymphoids (baboon)	Prolif_lymphoids_papio	Rejection vs 3-month protocol	Rejection	3-month protocol	11.4411	5.08856	2.2484	1.1689	0.340787	0.744098
Lymphoids (baboon)	Unclassified	6-month protocol vs 3-month protocol	6-month protocol	3-month protocol	5.66535	9.45639	0.599103	-0.739125	0.620632	0.810791
Lymphoids (baboon)	Unclassified	Prematurely terminated vs 3-month protocol	Prematurely terminated	3-month protocol	0	9.45639	1.05749e-07	-23.1729	0.604137	0.857065
Lymphoids (baboon)	Unclassified	PCMV/PRV vs 3-month protocol	PCMV/PRV	3-month protocol	7.40741	9.45639	0.783323	-0.352321	0.719236	0.94569
Lymphoids (baboon)	Unclassified	Rejection vs 3-month protocol	Rejection	3-month protocol	5.00538	9.45639	0.529312	-0.917809	0.787111	0.787111

## Sheet: Mye_papio
Major_Cell_type	Cell_State	Comparison	Group1	Group2	Group1_Mean_Proportion	Group2_Mean_Proportion	Fold_Change	log2FC	PValue	FDR
Myeloids (baboon)	DC_papio	6-month protocol vs 3-month protocol	6-month protocol	3-month protocol	2.33655	3.07801	0.759111	-0.397616	0.394432	0.591648
Myeloids (baboon)	DC_papio	Prematurely terminated vs 3-month protocol	Prematurely terminated	3-month protocol	16.8182	3.07801	5.46399	2.44995	0.170702	0.227602
Myeloids (baboon)	DC_papio	PCMV/PRV vs 3-month protocol	PCMV/PRV	3-month protocol	1.80708	3.07801	0.587095	-0.768334	0.146326	0.250101
Myeloids (baboon)	DC_papio	Rejection vs 3-month protocol	Rejection	3-month protocol	3.82838	3.07801	1.24379	0.314737	0.643031	0.701488
Myeloids (baboon)	MP_GBE1_papio	6-month protocol vs 3-month protocol	6-month protocol	3-month protocol	18.8809	4.36874	4.32182	2.11164	0.0175377	0.210452
Myeloids (baboon)	MP_GBE1_papio	Prematurely terminated vs 3-month protocol	Prematurely terminated	3-month protocol	10.2273	4.36874	2.34101	1.22713	0.236657	0.283989
Myeloids (baboon)	MP_GBE1_papio	PCMV/PRV vs 3-month protocol	PCMV/PRV	3-month protocol	11.1355	4.36874	2.54891	1.34988	0.322158	0.429544
Myeloids (baboon)	MP_GBE1_papio	Rejection vs 3-month protocol	Rejection	3-month protocol	17.8517	4.36874	4.08623	2.03077	0.0092703	0.0556218
Myeloids (baboon)	MP_ISG_papio	6-month protocol vs 3-month protocol	6-month protocol	3-month protocol	7.91291	7.22775	1.0948	0.130661	0.877188	0.926894
Myeloids (baboon)	MP_ISG_papio	Prematurely terminated vs 3-month protocol	Prematurely terminated	3-month protocol	1.13636	7.22775	0.157222	-2.66912	0.00617276	0.0185183
Myeloids (baboon)	MP_ISG_papio	PCMV/PRV vs 3-month protocol	PCMV/PRV	3-month protocol	20.525	7.22775	2.83975	1.50577	0.160656	0.250101
Myeloids (baboon)	MP_ISG_papio	Rejection vs 3-month protocol	Rejection	3-month protocol	15.9637	7.22775	2.20867	1.14318	0.138217	0.326904
Myeloids (baboon)	MP_LYVE1hi_papio	6-month protocol vs 3-month protocol	6-month protocol	3-month protocol	19.7482	27.0011	0.731383	-0.4513	0.0724738	0.434843
Myeloids (baboon)	MP_LYVE1hi_papio	Prematurely terminated vs 3-month protocol	Prematurely terminated	3-month protocol	1.13636	27.0011	0.0420858	-4.57052	0.000134808	0.0016177
Myeloids (baboon)	MP_LYVE1hi_papio	PCMV/PRV vs 3-month protocol	PCMV/PRV	3-month protocol	0	27.0011	3.70355e-08	-24.6865	0.00010511	0.00126131
Myeloids (baboon)	MP_LYVE1hi_papio	Rejection vs 3-month protocol	Rejection	3-month protocol	11.4139	27.0011	0.422719	-1.24223	0.0082255	0.0556218
Myeloids (baboon)	MP_LYVE1lo_papio	6-month protocol vs 3-month protocol	6-month protocol	3-month protocol	13.1657	18.591	0.708177	-0.497817	0.239957	0.575897
Myeloids (baboon)	MP_LYVE1lo_papio	Prematurely terminated vs 3-month protocol	Prematurely terminated	3-month protocol	1.13636	18.591	0.0611244	-4.03211	0.0042274	0.0169096
Myeloids (baboon)	MP_LYVE1lo_papio	PCMV/PRV vs 3-month protocol	PCMV/PRV	3-month protocol	0.952381	18.591	0.0512281	-4.28692	0.00334996	0.0133998
Myeloids (baboon)	MP_LYVE1lo_papio	Rejection vs 3-month protocol	Rejection	3-month protocol	14.8077	18.591	0.796499	-0.328256	0.27242	0.326904
Myeloids (baboon)	MP_NFkB_papio	6-month protocol vs 3-month protocol	6-month protocol	3-month protocol	0.441256	0.640571	0.688848	-0.537741	0.365857	0.591648
Myeloids (baboon)	MP_NFkB_papio	Prematurely terminated vs 3-month protocol	Prematurely terminated	3-month protocol	0	0.640571	1.56111e-06	-19.289	0.0161475	0.038754
Myeloids (baboon)	MP_NFkB_papio	PCMV/PRV vs 3-month protocol	PCMV/PRV	3-month protocol	0	0.640571	1.56111e-06	-19.289	0.00203327	0.0121996
Myeloids (baboon)	MP_NFkB_papio	Rejection vs 3-month protocol	Rejection	3-month protocol	0.402672	0.640571	0.628615	-0.669752	0.209039	0.326904
Myeloids (baboon)	MP_TREM2_papio	6-month protocol vs 3-month protocol	6-month protocol	3-month protocol	12.6303	9.65616	1.30801	0.387371	0.726694	0.926894
Myeloids (baboon)	MP_TREM2_papio	Prematurely terminated vs 3-month protocol	Prematurely terminated	3-month protocol	16.8182	9.65616	1.7417	0.8005	0.655539	0.655539
Myeloids (baboon)	MP_TREM2_papio	PCMV/PRV vs 3-month protocol	PCMV/PRV	3-month protocol	19.3162	9.65616	2.00041	1.00029	0.475684	0.570821
Myeloids (baboon)	MP_TREM2_papio	Rejection vs 3-month protocol	Rejection	3-month protocol	7.64216	9.65616	0.791428	-0.33747	0.196464	0.326904
Myeloids (baboon)	MP_groundstate_papio	6-month protocol vs 3-month protocol	6-month protocol	3-month protocol	16.1789	22.1003	0.732071	-0.449945	0.172777	0.575897
Myeloids (baboon)	MP_groundstate_papio	Prematurely terminated vs 3-month protocol	Prematurely terminated	3-month protocol	1.13636	22.1003	0.0514186	-4.28157	0.000754641	0.00452785
Myeloids (baboon)	MP_groundstate_papio	PCMV/PRV vs 3-month protocol	PCMV/PRV	3-month protocol	24.5543	22.1003	1.11104	0.151915	0.00738928	0.0177343
Myeloids (baboon)	MP_groundstate_papio	Rejection vs 3-month protocol	Rejection	3-month protocol	16.2828	22.1003	0.736769	-0.440715	0.0962018	0.326904
Myeloids (baboon)	Monocytes_papio	6-month protocol vs 3-month protocol	6-month protocol	3-month protocol	2.68708	3.016	0.890941	-0.166598	0.926894	0.926894
Myeloids (baboon)	Monocytes_papio	Prematurely terminated vs 3-month protocol	Prematurely terminated	3-month protocol	40.2273	3.016	13.3379	3.73746	0.0856563	0.128484
Myeloids (baboon)	Monocytes_papio	PCMV/PRV vs 3-month protocol	PCMV/PRV	3-month protocol	2.28327	3.016	0.757052	-0.401535	0.534924	0.583554
Myeloids (baboon)	Monocytes_papio	Rejection vs 3-month protocol	Rejection	3-month protocol	5.17132	3.016	1.71463	0.777894	0.264128	0.326904
Myeloids (baboon)	Mreg_DC_papio	6-month protocol vs 3-month protocol	6-month protocol	3-month protocol	0.723387	0.999546	0.723715	-0.466506	0.317566	0.591648
Myeloids (baboon)	Mreg_DC_papio	Prematurely terminated vs 3-month protocol	Prematurely terminated	3-month protocol	0	0.999546	1.00045e-06	-19.9309	0.0341154	0.0682309
Myeloids (baboon)	Mreg_DC_papio	PCMV/PRV vs 3-month protocol	PCMV/PRV	3-month protocol	0	0.999546	1.00045e-06	-19.9309	0.0056474	0.0169422
Myeloids (baboon)	Mreg_DC_papio	Rejection vs 3-month protocol	Rejection	3-month protocol	0.757189	0.999546	0.757533	-0.400619	0.230976	0.326904
Myeloids (baboon)	Prolif_Myeloids_papio	6-month protocol vs 3-month protocol	6-month protocol	3-month protocol	3.41776	1.74335	1.96046	0.97119	0.221187	0.575897
Myeloids (baboon)	Prolif_Myeloids_papio	Prematurely terminated vs 3-month protocol	Prematurely terminated	3-month protocol	0	1.74335	5.73609e-07	-20.7334	0.322169	0.351457
Myeloids (baboon)	Prolif_Myeloids_papio	PCMV/PRV vs 3-month protocol	PCMV/PRV	3-month protocol	2.75946	1.74335	1.58285	0.662528	0.617527	0.617527
Myeloids (baboon)	Prolif_Myeloids_papio	Rejection vs 3-month protocol	Rejection	3-month protocol	4.17177	1.74335	2.39297	1.2588	0.137391	0.326904
Myeloids (baboon)	Unclassified	6-month protocol vs 3-month protocol	6-month protocol	3-month protocol	1.877	1.57751	1.18985	0.250779	0.798064	0.926894
Myeloids (baboon)	Unclassified	Prematurely terminated vs 3-month protocol	Prematurely terminated	3-month protocol	11.3636	1.57751	7.20351	2.8487	0.0592397	0.101554
Myeloids (baboon)	Unclassified	PCMV/PRV vs 3-month protocol	PCMV/PRV	3-month protocol	16.6667	1.57751	10.5651	3.40124	0.166734	0.250101
Myeloids (baboon)	Unclassified	Rejection vs 3-month protocol	Rejection	3-month protocol	1.70672	1.57751	1.0819	0.113573	0.878726	0.878726

## Sheet: Res_Immune
Major_Cell_type	Cell_State	Comparison	Group1	Group2	Group1_Mean_Proportion	Group2_Mean_Proportion	Fold_Change	log2FC	PValue	FDR
Resident Immune	B_cells_sus	Control vs 3-month protocol	Control	3-month protocol	1.36438	0	1.36438e+06	20.3798
Resident Immune	B_cells_sus	6-month protocol vs 3-month protocol	6-month protocol	3-month protocol	0	0	1	0
Resident Immune	B_cells_sus	Prematurely terminated vs 3-month protocol	Prematurely terminated	3-month protocol	0	0	1	0
Resident Immune	B_cells_sus	PCMV/PRV vs 3-month protocol	PCMV/PRV	3-month protocol	0	0	1	0
Resident Immune	B_cells_sus	Rejection vs 3-month protocol	Rejection	3-month protocol	0	0	1	0
Resident Immune	CD4T_naive_sus	Control vs 3-month protocol	Control	3-month protocol	3.91214	0	3.91214e+06	21.8995
Resident Immune	CD4T_naive_sus	6-month protocol vs 3-month protocol	6-month protocol	3-month protocol	0	0	1	0
Resident Immune	CD4T_naive_sus	Prematurely terminated vs 3-month protocol	Prematurely terminated	3-month protocol	0.715505	0	715505	19.4486
Resident Immune	CD4T_naive_sus	PCMV/PRV vs 3-month protocol	PCMV/PRV	3-month protocol	0	0	1	0
Resident Immune	CD4T_naive_sus	Rejection vs 3-month protocol	Rejection	3-month protocol	0	0	1	0
Resident Immune	CD8T_cytox_1_sus	Control vs 3-month protocol	Control	3-month protocol	8.09117	0	8.09117e+06	22.9479
Resident Immune	CD8T_cytox_1_sus	6-month protocol vs 3-month protocol	6-month protocol	3-month protocol	0	0	1	0
Resident Immune	CD8T_cytox_1_sus	Prematurely terminated vs 3-month protocol	Prematurely terminated	3-month protocol	1.01915	0	1.01915e+06	19.9589
Resident Immune	CD8T_cytox_1_sus	PCMV/PRV vs 3-month protocol	PCMV/PRV	3-month protocol	0	0	1	0
Resident Immune	CD8T_cytox_1_sus	Rejection vs 3-month protocol	Rejection	3-month protocol	0	0	1	0
Resident Immune	CD8T_cytox_2_sus	Control vs 3-month protocol	Control	3-month protocol	2.45727	0	2.45727e+06	21.2286
Resident Immune	CD8T_cytox_2_sus	6-month protocol vs 3-month protocol	6-month protocol	3-month protocol	0	0	1	0
Resident Immune	CD8T_cytox_2_sus	Prematurely terminated vs 3-month protocol	Prematurely terminated	3-month protocol	0.101215	0	101215	16.6271
Resident Immune	CD8T_cytox_2_sus	PCMV/PRV vs 3-month protocol	PCMV/PRV	3-month protocol	0	0	1	0
Resident Immune	CD8T_cytox_2_sus	Rejection vs 3-month protocol	Rejection	3-month protocol	0	0	1	0
Resident Immune	DC_sus	Control vs 3-month protocol	Control	3-month protocol	2.57323	0	2.57323e+06	21.2952
Resident Immune	DC_sus	6-month protocol vs 3-month protocol	6-month protocol	3-month protocol	0	0	1	0
Resident Immune	DC_sus	Prematurely terminated vs 3-month protocol	Prematurely terminated	3-month protocol	0.284801	0	284801	18.1196
Resident Immune	DC_sus	PCMV/PRV vs 3-month protocol	PCMV/PRV	3-month protocol	0	0	1	0
Resident Immune	DC_sus	Rejection vs 3-month protocol	Rejection	3-month protocol	0	0	1	0
Resident Immune	MO_CD16_sus	Control vs 3-month protocol	Control	3-month protocol	5.25068	0	5.25068e+06	22.3241
Resident Immune	MO_CD16_sus	6-month protocol vs 3-month protocol	6-month protocol	3-month protocol	0	0	1	0
Resident Immune	MO_CD16_sus	Prematurely terminated vs 3-month protocol	Prematurely terminated	3-month protocol	6.01368	0	6.01368e+06	22.5198
Resident Immune	MO_CD16_sus	PCMV/PRV vs 3-month protocol	PCMV/PRV	3-month protocol	1.06838	0	1.06838e+06	20.027
Resident Immune	MO_CD16_sus	Rejection vs 3-month protocol	Rejection	3-month protocol	0	0	1	0
Resident Immune	MP_ISG_sus	Control vs 3-month protocol	Control	3-month protocol	1.69538	0	1.69538e+06	20.6932
Resident Immune	MP_ISG_sus	6-month protocol vs 3-month protocol	6-month protocol	3-month protocol	25	0	25000000	24.5754
Resident Immune	MP_ISG_sus	Prematurely terminated vs 3-month protocol	Prematurely terminated	3-month protocol	2.14652	0	2.14652e+06	21.0336
Resident Immune	MP_ISG_sus	PCMV/PRV vs 3-month protocol	PCMV/PRV	3-month protocol	25.5599	0	2.55599e+07	24.6074
Resident Immune	MP_ISG_sus	Rejection vs 3-month protocol	Rejection	3-month protocol	21.3609	0	2.13609e+07	24.3485
Resident Immune	MP_LYVE1hi_1.0_sus	Control vs 3-month protocol	Control	3-month protocol	21.3047	26.3158	0.80958	-0.304755
Resident Immune	MP_LYVE1hi_1.0_sus	6-month protocol vs 3-month protocol	6-month protocol	3-month protocol	0	26.3158	3.8e-08	-24.6494
Resident Immune	MP_LYVE1hi_1.0_sus	Prematurely terminated vs 3-month protocol	Prematurely terminated	3-month protocol	0	26.3158	3.8e-08	-24.6494
Resident Immune	MP_LYVE1hi_1.0_sus	PCMV/PRV vs 3-month protocol	PCMV/PRV	3-month protocol	0.849291	26.3158	0.0322731	-4.95353
Resident Immune	MP_LYVE1hi_1.0_sus	Rejection vs 3-month protocol	Rejection	3-month protocol	9.18561	26.3158	0.349053	-1.51848
Resident Immune	MP_LYVE1hi_2.0_sus	Control vs 3-month protocol	Control	3-month protocol	0.213016	6.66667	0.0319524	-4.96793
Resident Immune	MP_LYVE1hi_2.0_sus	6-month protocol vs 3-month protocol	6-month protocol	3-month protocol	12.5	6.66667	1.875	0.906891
Resident Immune	MP_LYVE1hi_2.0_sus	Prematurely terminated vs 3-month protocol	Prematurely terminated	3-month protocol	27.187	6.66667	4.07806	2.02788
Resident Immune	MP_LYVE1hi_2.0_sus	PCMV/PRV vs 3-month protocol	PCMV/PRV	3-month protocol	26.2063	6.66667	3.93095	1.97488
Resident Immune	MP_LYVE1hi_2.0_sus	Rejection vs 3-month protocol	Rejection	3-month protocol	16.8155	6.66667	2.52232	1.33475
Resident Immune	MP_NFkB_sus	Control vs 3-month protocol	Control	3-month protocol	0.995632	1.05263	0.94585	-0.0803167
Resident Immune	MP_NFkB_sus	6-month protocol vs 3-month protocol	6-month protocol	3-month protocol	0	1.05263	9.5e-07	-20.0056
Resident Immune	MP_NFkB_sus	Prematurely terminated vs 3-month protocol	Prematurely terminated	3-month protocol	0.284801	1.05263	0.270561	-1.88597
Resident Immune	MP_NFkB_sus	PCMV/PRV vs 3-month protocol	PCMV/PRV	3-month protocol	0.213675	1.05263	0.202991	-2.30051
Resident Immune	MP_NFkB_sus	Rejection vs 3-month protocol	Rejection	3-month protocol	1.47457	1.05263	1.40084	0.486291
Resident Immune	MP_SPP1_sus	Control vs 3-month protocol	Control	3-month protocol	0.260929	0	260929	17.9933
Resident Immune	MP_SPP1_sus	6-month protocol vs 3-month protocol	6-month protocol	3-month protocol	12.5	0	12500000	23.5754
Resident Immune	MP_SPP1_sus	Prematurely terminated vs 3-month protocol	Prematurely terminated	3-month protocol	17.8456	0	1.78456e+07	24.0891
Resident Immune	MP_SPP1_sus	PCMV/PRV vs 3-month protocol	PCMV/PRV	3-month protocol	23.7856	0	2.37856e+07	24.5036
Resident Immune	MP_SPP1_sus	Rejection vs 3-month protocol	Rejection	3-month protocol	7.10227	0	7.10227e+06	22.7598
Resident Immune	MP_TREM2_sus	Control vs 3-month protocol	Control	3-month protocol	0.667114	1.05263	0.633759	-0.657995
Resident Immune	MP_TREM2_sus	6-month protocol vs 3-month protocol	6-month protocol	3-month protocol	0	1.05263	9.5e-07	-20.0056
Resident Immune	MP_TREM2_sus	Prematurely terminated vs 3-month protocol	Prematurely terminated	3-month protocol	36.3099	1.05263	34.4944	5.10829
Resident Immune	MP_TREM2_sus	PCMV/PRV vs 3-month protocol	PCMV/PRV	3-month protocol	11.6872	1.05263	11.1029	3.47286
Resident Immune	MP_TREM2_sus	Rejection vs 3-month protocol	Rejection	3-month protocol	6.92641	1.05263	6.58009	2.71811
Resident Immune	MP_groundstate_sus	Control vs 3-month protocol	Control	3-month protocol	35.5896	64.9123	0.548272	-0.867036
Resident Immune	MP_groundstate_sus	6-month protocol vs 3-month protocol	6-month protocol	3-month protocol	0	64.9123	1.54054e-08	-25.952
Resident Immune	MP_groundstate_sus	Prematurely terminated vs 3-month protocol	Prematurely terminated	3-month protocol	1.3298	64.9123	0.020486	-5.60921
Resident Immune	MP_groundstate_sus	PCMV/PRV vs 3-month protocol	PCMV/PRV	3-month protocol	8.30629	64.9123	0.127962	-2.96622
Resident Immune	MP_groundstate_sus	Rejection vs 3-month protocol	Rejection	3-month protocol	28.5173	64.9123	0.439321	-1.18665
Resident Immune	MP_PCMV/PRV_sus	Control vs 3-month protocol	Control	3-month protocol	0.580609	0	580609	19.1472
Resident Immune	MP_PCMV/PRV_sus	6-month protocol vs 3-month protocol	6-month protocol	3-month protocol	0	0	1	0
Resident Immune	MP_PCMV/PRV_sus	Prematurely terminated vs 3-month protocol	Prematurely terminated	3-month protocol	0.202429	0	202429	17.6271
Resident Immune	MP_PCMV/PRV_sus	PCMV/PRV vs 3-month protocol	PCMV/PRV	3-month protocol	0.635616	0	635616	19.2778
Resident Immune	MP_PCMV/PRV_sus	Rejection vs 3-month protocol	Rejection	3-month protocol	8.33333	0	8.33333e+06	22.9905
Resident Immune	NK_CD16hi_IFNhi_sus	Control vs 3-month protocol	Control	3-month protocol	5.76155	0	5.76155e+06	22.458
Resident Immune	NK_CD16hi_IFNhi_sus	6-month protocol vs 3-month protocol	6-month protocol	3-month protocol	0	0	1	0
Resident Immune	NK_CD16hi_IFNhi_sus	Prematurely terminated vs 3-month protocol	Prematurely terminated	3-month protocol	0.202429	0	202429	17.6271
Resident Immune	NK_CD16hi_IFNhi_sus	PCMV/PRV vs 3-month protocol	PCMV/PRV	3-month protocol	0	0	1	0
Resident Immune	NK_CD16hi_IFNhi_sus	Rejection vs 3-month protocol	Rejection	3-month protocol	0	0	1	0
Resident Immune	NK_CD16hi_sus	Control vs 3-month protocol	Control	3-month protocol	1.45458	0	1.45458e+06	20.4722
Resident Immune	NK_CD16hi_sus	6-month protocol vs 3-month protocol	6-month protocol	3-month protocol	0	0	1	0
Resident Immune	NK_CD16hi_sus	Prematurely terminated vs 3-month protocol	Prematurely terminated	3-month protocol	0.101215	0	101215	16.6271
Resident Immune	NK_CD16hi_sus	PCMV/PRV vs 3-month protocol	PCMV/PRV	3-month protocol	0	0	1	0
Resident Immune	NK_CD16hi_sus	Rejection vs 3-month protocol	Rejection	3-month protocol	0	0	1	0
Resident Immune	NK_CD69hi_sus	Control vs 3-month protocol	Control	3-month protocol	2.36151	0	2.36151e+06	21.1713
Resident Immune	NK_CD69hi_sus	6-month protocol vs 3-month protocol	6-month protocol	3-month protocol	0	0	1	0
Resident Immune	NK_CD69hi_sus	Prematurely terminated vs 3-month protocol	Prematurely terminated	3-month protocol	1.12036	0	1.12036e+06	20.0955
Resident Immune	NK_CD69hi_sus	PCMV/PRV vs 3-month protocol	PCMV/PRV	3-month protocol	0	0	1	0
Resident Immune	NK_CD69hi_sus	Rejection vs 3-month protocol	Rejection	3-month protocol	0	0	1	0
Resident Immune	Prolif_Immune_sus	Control vs 3-month protocol	Control	3-month protocol	2.2669	0	2.2669e+06	21.1123
Resident Immune	Prolif_Immune_sus	6-month protocol vs 3-month protocol	6-month protocol	3-month protocol	50	0	50000000	25.5754
Resident Immune	Prolif_Immune_sus	Prematurely terminated vs 3-month protocol	Prematurely terminated	3-month protocol	5.05323	0	5.05323e+06	22.2688
Resident Immune	Prolif_Immune_sus	PCMV/PRV vs 3-month protocol	PCMV/PRV	3-month protocol	1.68776	0	1.68776e+06	20.6867
Resident Immune	Prolif_Immune_sus	Rejection vs 3-month protocol	Rejection	3-month protocol	0.284091	0	284091	18.116
Resident Immune	innate_lymphoid_cells_sus	Control vs 3-month protocol	Control	3-month protocol	1.47201	0	1.47201e+06	20.4894
Resident Immune	innate_lymphoid_cells_sus	6-month protocol vs 3-month protocol	6-month protocol	3-month protocol	0	0	1	0
Resident Immune	innate_lymphoid_cells_sus	Prematurely terminated vs 3-month protocol	Prematurely terminated	3-month protocol	0.0823723	0	82372.3	16.3299
Resident Immune	innate_lymphoid_cells_sus	PCMV/PRV vs 3-month protocol	PCMV/PRV	3-month protocol	0	0	1	0
Resident Immune	innate_lymphoid_cells_sus	Rejection vs 3-month protocol	Rejection	3-month protocol	0	0	1	0
Resident Immune	unclassified_sus	Control vs 3-month protocol	Control	3-month protocol	1.72756	0	1.72756e+06	20.7203
Resident Immune	unclassified_sus	6-month protocol vs 3-month protocol	6-month protocol	3-month protocol	0	0	1	0
Resident Immune	unclassified_sus	Prematurely terminated vs 3-month protocol	Prematurely terminated	3-month protocol	0	0	1	0
Resident Immune	unclassified_sus	PCMV/PRV vs 3-month protocol	PCMV/PRV	3-month protocol	0	0	1	0
Resident Immune	unclassified_sus	Rejection vs 3-month protocol	Rejection	3-month protocol	0	0	1	0

## Sheet: Vasc_EC
Major_Cell_type	Cell_State	Comparison	Group1	Group2	Group1_Mean_Proportion	Group2_Mean_Proportion	Fold_Change	log2FC	PValue	FDR
Vascular EC	Angiogenic_EC	Control vs 3-month protocol	Control	3-month protocol	6.59363	9.51186	0.693201	-0.528655	0.999907	0.999907
Vascular EC	Angiogenic_EC	6-month protocol vs 3-month protocol	6-month protocol	3-month protocol	8.01144	9.51186	0.842258	-0.247665	0.635455	0.714886
Vascular EC	Angiogenic_EC	Prematurely terminated vs 3-month protocol	Prematurely terminated	3-month protocol	9.74945	9.51186	1.02498	0.0355933	0.37656	0.754021
Vascular EC	Angiogenic_EC	PCMV/PRV vs 3-month protocol	PCMV/PRV	3-month protocol	5.40459	9.51186	0.568195	-0.815543	0.538555	0.769364
Vascular EC	Angiogenic_EC	Rejection vs 3-month protocol	Rejection	3-month protocol	9.52834	9.51186	1.00173	0.0024979	0.412931	0.66662
Vascular EC	Antiinf_EC	Control vs 3-month protocol	Control	3-month protocol	23.7284	21.5758	1.09977	0.137204	0.131941	0.233781
Vascular EC	Antiinf_EC	6-month protocol vs 3-month protocol	6-month protocol	3-month protocol	10.7476	21.5758	0.498133	-1.0054	0.184515	0.415158
Vascular EC	Antiinf_EC	Prematurely terminated vs 3-month protocol	Prematurely terminated	3-month protocol	21.1341	21.5758	0.979528	-0.0298416	0.418901	0.754021
Vascular EC	Antiinf_EC	PCMV/PRV vs 3-month protocol	PCMV/PRV	3-month protocol	6.36599	21.5758	0.295053	-1.76096	0.0142666	0.0998944
Vascular EC	Antiinf_EC	Rejection vs 3-month protocol	Rejection	3-month protocol	12.3044	21.5758	0.570286	-0.810241	0.375609	0.66662
Vascular EC	Arterial_EC	Control vs 3-month protocol	Control	3-month protocol	8.05425	7.18938	1.1203	0.163882	0.155854	0.233781
Vascular EC	Arterial_EC	6-month protocol vs 3-month protocol	6-month protocol	3-month protocol	3.68496	7.18938	0.512556	-0.964219	0.1579	0.415158
Vascular EC	Arterial_EC	Prematurely terminated vs 3-month protocol	Prematurely terminated	3-month protocol	5.11829	7.18938	0.711924	-0.490205	0.924671	0.924671
Vascular EC	Arterial_EC	PCMV/PRV vs 3-month protocol	PCMV/PRV	3-month protocol	4.52203	7.18938	0.628987	-0.668898	0.236268	0.472536
Vascular EC	Arterial_EC	Rejection vs 3-month protocol	Rejection	3-month protocol	7.86989	7.18938	1.09465	0.130474	0.227062	0.567656
Vascular EC	Cap_EC	Control vs 3-month protocol	Control	3-month protocol	40.4284	15.2668	2.64812	1.40497	0.00745127	0.0335307
Vascular EC	Cap_EC	6-month protocol vs 3-month protocol	6-month protocol	3-month protocol	3.14056	15.2668	0.205712	-2.2813	0.0360067	0.16203
Vascular EC	Cap_EC	Prematurely terminated vs 3-month protocol	Prematurely terminated	3-month protocol	26.4035	15.2668	1.72947	0.790332	0.138607	0.509365
Vascular EC	Cap_EC	PCMV/PRV vs 3-month protocol	PCMV/PRV	3-month protocol	5.92627	15.2668	0.38818	-1.3652	0.644551	0.805689
Vascular EC	Cap_EC	Rejection vs 3-month protocol	Rejection	3-month protocol	9.25819	15.2668	0.606427	-0.721595	0.766504	0.766504
Vascular EC	Cap_EC_ISG	Control vs 3-month protocol	Control	3-month protocol	6.61255	10.6934	0.618378	-0.693439	0.942688	0.999907
Vascular EC	Cap_EC_ISG	6-month protocol vs 3-month protocol	6-month protocol	3-month protocol	7.65799	10.6934	0.716144	-0.481679	0.565216	0.714886
Vascular EC	Cap_EC_ISG	Prematurely terminated vs 3-month protocol	Prematurely terminated	3-month protocol	5.38154	10.6934	0.503259	-0.990626	0.892047	0.924671
Vascular EC	Cap_EC_ISG	PCMV/PRV vs 3-month protocol	PCMV/PRV	3-month protocol	36.685	10.6934	3.43063	1.77847	0.0199789	0.0998944
Vascular EC	Cap_EC_ISG	Rejection vs 3-month protocol	Rejection	3-month protocol	15.0813	10.6934	1.41034	0.496046	0.466634	0.66662
Vascular EC	EC_PCMV/PRV_sus	Control vs 3-month protocol	Control	3-month protocol	0	0	1	0
Vascular EC	EC_PCMV/PRV_sus	6-month protocol vs 3-month protocol	6-month protocol	3-month protocol	0	0	1	0
Vascular EC	EC_PCMV/PRV_sus	Prematurely terminated vs 3-month protocol	Prematurely terminated	3-month protocol	0	0	1	0
Vascular EC	EC_PCMV/PRV_sus	PCMV/PRV vs 3-month protocol	PCMV/PRV	3-month protocol	2.38214	0	2.38214e+06	21.1838	0.205664	0.472536
Vascular EC	EC_PCMV/PRV_sus	Rejection vs 3-month protocol	Rejection	3-month protocol	0.157233	0	157233	17.2625	0.200394	0.567656
Vascular EC	Hypoxia_EC	Control vs 3-month protocol	Control	3-month protocol	5.04719	21.0102	0.240225	-2.05754	0.00253725	0.0228353
Vascular EC	Hypoxia_EC	6-month protocol vs 3-month protocol	6-month protocol	3-month protocol	49.7435	21.0102	2.36759	1.24342	0.00238804	0.0214924
Vascular EC	Hypoxia_EC	Prematurely terminated vs 3-month protocol	Prematurely terminated	3-month protocol	26.1971	21.0102	1.24687	0.318312	0.169788	0.509365
Vascular EC	Hypoxia_EC	PCMV/PRV vs 3-month protocol	PCMV/PRV	3-month protocol	33.8742	21.0102	1.61227	0.689096	0.135016	0.450053
Vascular EC	Hypoxia_EC	Rejection vs 3-month protocol	Rejection	3-month protocol	36.5883	21.0102	1.74145	0.800289	0.00687719	0.0687719
Vascular EC	Meso_EC	Control vs 3-month protocol	Control	3-month protocol	7.13333	6.70725	1.06352	0.0888536	0.363577	0.467456
Vascular EC	Meso_EC	6-month protocol vs 3-month protocol	6-month protocol	3-month protocol	7.69579	6.70725	1.14738	0.198348	0.73412	0.73412
Vascular EC	Meso_EC	Prematurely terminated vs 3-month protocol	Prematurely terminated	3-month protocol	2.59461	6.70725	0.386836	-1.37021	0.53121	0.796815
Vascular EC	Meso_EC	PCMV/PRV vs 3-month protocol	PCMV/PRV	3-month protocol	3.78719	6.70725	0.564641	-0.824595	0.995395	0.995395
Vascular EC	Meso_EC	Rejection vs 3-month protocol	Rejection	3-month protocol	3.01902	6.70725	0.450114	-1.15164	0.596792	0.681181
Vascular EC	NFkB_EC	Control vs 3-month protocol	Control	3-month protocol	0.766153	1.96556	0.389789	-1.35923	0.0631287	0.142039
Vascular EC	NFkB_EC	6-month protocol vs 3-month protocol	6-month protocol	3-month protocol	1.95906	1.96556	0.996693	-0.00477845	0.584056	0.714886
Vascular EC	NFkB_EC	Prematurely terminated vs 3-month protocol	Prematurely terminated	3-month protocol	0.270674	1.96556	0.137708	-2.86031	0.00489342	0.0440407
Vascular EC	NFkB_EC	PCMV/PRV vs 3-month protocol	PCMV/PRV	3-month protocol	0.724123	1.96556	0.368406	-1.44063	0.414183	0.690305
Vascular EC	NFkB_EC	Rejection vs 3-month protocol	Rejection	3-month protocol	0.827748	1.96556	0.421127	-1.24767	0.186014	0.567656
Vascular EC	Prolif_EC	Control vs 3-month protocol	Control	3-month protocol	1.63609	6.07976	0.269104	-1.89376	0.0607146	0.142039
Vascular EC	Prolif_EC	6-month protocol vs 3-month protocol	6-month protocol	3-month protocol	7.35903	6.07976	1.21042	0.275502	0.424707	0.714886
Vascular EC	Prolif_EC	Prematurely terminated vs 3-month protocol	Prematurely terminated	3-month protocol	3.1508	6.07976	0.518245	-0.948293	0.747379	0.924671
Vascular EC	Prolif_EC	PCMV/PRV vs 3-month protocol	PCMV/PRV	3-month protocol	0.328407	6.07976	0.0540165	-4.21046	0.959239	0.995395
Vascular EC	Prolif_EC	Rejection vs 3-month protocol	Rejection	3-month protocol	5.36562	6.07976	0.882538	-0.18027	0.613063	0.681181
