# Supplementary material for: Integrated Molecular Profiling of Preclinical and Clinical Cardiac Xenotransplants
Source: Research Square preprint supplement (doi:10.21203/rs.3.rs-8406985/v1), 2026-02-04
Supplement: Supplementary file 35 [file c3fc2d2b5a0298e2f3e02403.xlsx]

## Sheet: Sheet1
Gene_set	Term	Overlap	P-value	Adjusted P-value	Old P-value	Old Adjusted P-value	Odds Ratio	Combined Score	Genes	Regulation	Cell type	Comparison	GeneSet	-log10(FDR)
MSigDB_Hallmark_2020	Hypoxia	7/200	0.000217295	0.00151599	0	0	6.26316	52.8251	GBE1;SERPINE1;MXI1;SLC2A1;SLC2A5;NDRG1;VEGFA	Up-regulated	Myeloids_baboon	6-month vs 3-month protocol	MSigDB_Hallmark_2020	2.8193
MSigDB_Hallmark_2020	Complement	7/200	0.000217295	0.00151599	0	0	6.26316	52.8251	COL4A2;DOCK9;CPQ;SERPINE1;CDH13;CD36;ZFPM2	Up-regulated	Myeloids_baboon	6-month vs 3-month protocol	MSigDB_Hallmark_2020	2.8193
MSigDB_Hallmark_2020	Interferon Alpha Response	1997-01-01	0.0240181	0.0490145	0	0	51.8203	193.235	RSAD2	Up-regulated	Mural_cells	6-month vs 3-month protocol	MSigDB_Hallmark_2020	1.30968
MSigDB_Hallmark_2020	Hypoxia	1/200	0.0490145	0.0490145	0	0	24.8693	74.997	NDRG1	Up-regulated	Mural_cells	6-month vs 3-month protocol	MSigDB_Hallmark_2020	1.30968
MSigDB_Hallmark_2020	Interferon Gamma Response	1/200	0.0490145	0.0490145	0	0	24.8693	74.997	RSAD2	Up-regulated	Mural_cells	6-month vs 3-month protocol	MSigDB_Hallmark_2020	1.30968
MSigDB_Hallmark_2020	p53 Pathway	1/200	0.0490145	0.0490145	0	0	24.8693	74.997	NDRG1	Up-regulated	Mural_cells	6-month vs 3-month protocol	MSigDB_Hallmark_2020	1.30968
MSigDB_Hallmark_2020	Complement	1/200	0.0490145	0.0490145	0	0	24.8693	74.997	PLAT	Up-regulated	Mural_cells	6-month vs 3-month protocol	MSigDB_Hallmark_2020	1.30968
MSigDB_Hallmark_2020	Interferon Gamma Response	9/200	6.09849e-07	4.63485e-06	0	0	10.4358	149.338	NFKBIA;IFIH1;RSAD2;CCL5;TNFAIP3;TXNIP;ISG15;IFIT1;IFIT2	Up-regulated	Resident_Immune	6-month vs 3-month protocol	MSigDB_Hallmark_2020	5.33396
MSigDB_Hallmark_2020	Interferon Alpha Response	1997-05-01	0.000115002	0.000624298	0	0	11.5767	105.007	IFIH1;RSAD2;TXNIP;ISG15;IFIT2	Up-regulated	Resident_Immune	6-month vs 3-month protocol	MSigDB_Hallmark_2020	3.20461
MSigDB_Hallmark_2020	Hypoxia	6/200	0.000455161	0.00192179	0	0	6.62528	50.9806	HSPA5;NOCT;TNFAIP3;IRS2;ENO1;HK2	Up-regulated	Resident_Immune	6-month vs 3-month protocol	MSigDB_Hallmark_2020	2.71629
MSigDB_Hallmark_2020	Complement	5/200	0.00304649	0.00964723	0	0	5.43342	31.4799	HSPA5;CSRP1;CCL5;TNFAIP3;CLU	Up-regulated	Resident_Immune	6-month vs 3-month protocol	MSigDB_Hallmark_2020	2.0156
MSigDB_Hallmark_2020	p53 Pathway	4/200	0.0169055	0.0401507	0	0	4.27833	17.4561	RRAD;TXNIP;NUPR1;MXD1	Up-regulated	Resident_Immune	6-month vs 3-month protocol	MSigDB_Hallmark_2020	1.39631
MSigDB_Hallmark_2020	Interferon Gamma Response	1/200	0.0297023	0.0297023	0	0	49.7437	174.925	MX2	Up-regulated	Neuronal_cells	6-month vs 3-month protocol	MSigDB_Hallmark_2020	1.52721
MSigDB_Hallmark_2020	p53 Pathway	1/200	0.0297023	0.0297023	0	0	49.7437	174.925	VWA5A	Up-regulated	Neuronal_cells	6-month vs 3-month protocol	MSigDB_Hallmark_2020	1.52721
MSigDB_Hallmark_2020	Interferon Alpha Response	29/97	1.04273e-24	4.58799e-23	0	0	19.4519	1074.14	LGALS3BP;UBA7;CNP;SAMD9;UBE2L6;IFI35;TMEM140;DDX60;IFIT2;OASL;B2M;BATF2;RSAD2;SP110;IL15;MX1;ISG15;NMI;PARP14;PARP9;PSMB8;PSMB9;BST2;ISG20;MOV10;CXCL11;PLSCR1;IRF1;CMPK2	Up-regulated	CM	6-month vs 3-month protocol	MSigDB_Hallmark_2020	22.3384
MSigDB_Hallmark_2020	Interferon Gamma Response	35/200	4.15684e-21	9.14504e-20	0	0	9.76413	458.226	CD86;LGALS3BP;UBE2L6;IFI35;IFIT1;DDX60;HIF1A;IFIT2;OASL;CCL5;UPP1;B2M;ZBP1;BATF2;RSAD2;SP110;IL15;P2RY14;MX2;MX1;ISG15;NMI;PARP14;PSMB8;PSMB9;BST2;ISG20;PLSCR1;CXCL11;ZNFX1;OAS2;IRF1;CMPK2;MYD88;PFKP	Up-regulated	CM	6-month vs 3-month protocol	MSigDB_Hallmark_2020	19.0388
MSigDB_Hallmark_2020	Hypoxia	22/200	1.21206e-09	1.77768e-08	0	0	5.51509	113.23	ERO1A;KDM3A;WSB1;PFKFB3;HSPA5;ADM;AK4;ENO1;ETS1;NDRG1;HS3ST1;LDHC;ISG20;PFKL;FAM162A;STC2;DDIT4;PGK1;HMOX1;PFKP;CHST3;TMEM45A	Up-regulated	CM	6-month vs 3-month protocol	MSigDB_Hallmark_2020	7.75015
MSigDB_Hallmark_2020	p53 Pathway	14/200	0.000210191	0.00115605	0	0	3.2965	27.9131	PMM1;APAF1;LIF;RNF19B;KLK8;NDRG1;ZFP36L1;FAM162A;DDIT4;NINJ1;HMOX1;TRIB3;NUPR1;UPP1	Up-regulated	CM	6-month vs 3-month protocol	MSigDB_Hallmark_2020	2.93702
MSigDB_Hallmark_2020	Complement	11/200	0.00635309	0.0232947	0	0	2.53142	12.806	LGALS3;PLSCR1;RABIF;GCA;HSPA5;ERAP2;IRF1;CCL5;CTSH;LIPA;PSMB9	Up-regulated	CM	6-month vs 3-month protocol	MSigDB_Hallmark_2020	1.63274
MSigDB_Hallmark_2020	Hypoxia	7/200	1.55878e-06	4.2087e-05	0	0	14.3264	191.567	DTNA;PFKFB3;GBE1;RRAGD;IRS2;HK2;VEGFA	Up-regulated	Endocardial_lymphatic_EC	6-month vs 3-month protocol	MSigDB_Hallmark_2020	4.37585
MSigDB_Hallmark_2020	Interferon Alpha Response	1997-04-01	0.000168638	0.00227661	0	0	16.1087	139.949	RSAD2;ISG15;DDX60;OASL	Up-regulated	Endocardial_lymphatic_EC	6-month vs 3-month protocol	MSigDB_Hallmark_2020	2.64271
MSigDB_Hallmark_2020	Interferon Gamma Response	4/200	0.00253414	0.0114036	0	0	7.60377	45.4546	RSAD2;ISG15;DDX60;OASL	Up-regulated	Endocardial_lymphatic_EC	6-month vs 3-month protocol	MSigDB_Hallmark_2020	1.94296
