# Supplementary material for: Integrated Molecular Profiling of Preclinical and Clinical Cardiac Xenotransplants
Source: Research Square preprint supplement (doi:10.21203/rs.3.rs-8406985/v1), 2026-02-04
Supplement: Supplementary file 36 [file c6e5c525364d6fcf16fb5918.xlsx]

## Sheet: Sheet1
Condition	N_cells	S_score_median	G2M_score_median	Proportion_G1	Proportion_S	Proportion_G2M
Control	1297	-0.00607006	-0.0324925	0.499614	0.395528	0.104857
PCMV/PRV	998	-0.00215214	-0.0359883	0.475952	0.457916	0.0661323
Prematurely terminated	1468	-0.00616804	-0.029176	0.555858	0.342643	0.101499
Rejection	1719	-0.00434885	-0.0339577	0.513671	0.394415	0.0919139
6-month protocol	783	0	-0.0342599	0.409962	0.475096	0.114943
3-month protocol	1955	-0.0056079	-0.0326714	0.480818	0.401023	0.118159
