# Supplementary material for: Integrated Molecular Profiling of Preclinical and Clinical Cardiac Xenotransplants
Source: Research Square preprint supplement (doi:10.21203/rs.3.rs-8406985/v1), 2026-02-04
Supplement: Supplementary file 37 [file c78fe4df9489ed8729b8bd17.xlsx]

## Sheet: Sheet1
Cell_type	Comparison	Group1	Group2	Group1_Mean_Proportion	Group2_Mean_Proportion	Fold_Change	log2FC	PValue	FDR
CM	Control vs 3-month protocol	Control	3-month protocol	78.8404	76.4372	1.03144	0.0446609	0.0114751	0.0180322
CM	6-month protocol vs 3-month protocol	6-month protocol	3-month protocol	72.1299	76.4372	0.943649	-0.083678	0.13336	0.326015
CM	Prematurely terminated vs 3-month protocol	Prematurely terminated	3-month protocol	65.4521	76.4372	0.856287	-0.223834	0.741524	0.886981
CM	PCMV/PRV vs 3-month protocol	PCMV/PRV	3-month protocol	78.7999	76.4372	1.03091	0.0439187	0.214603	0.238477
CM	Rejection vs 3-month protocol	Rejection	3-month protocol	62.1193	76.4372	0.812685	-0.299232	0.155563	0.677668
Endocardial/lymphatic EC	Control vs 3-month protocol	Control	3-month protocol	1.07026	0.983892	1.08778	0.121385	0.0424774	0.0519168
Endocardial/lymphatic EC	6-month protocol vs 3-month protocol	6-month protocol	3-month protocol	0.686061	0.983892	0.697293	-0.520162	0.161617	0.326015
Endocardial/lymphatic EC	Prematurely terminated vs 3-month protocol	Prematurely terminated	3-month protocol	1.07989	0.983892	1.09757	0.134308	0.886981	0.886981
Endocardial/lymphatic EC	PCMV/PRV vs 3-month protocol	PCMV/PRV	3-month protocol	0.832485	0.983892	0.846114	-0.241076	0.894513	0.894513
Endocardial/lymphatic EC	Rejection vs 3-month protocol	Rejection	3-month protocol	0.803615	0.983892	0.816771	-0.291996	0.184818	0.677668
Endothelial cells (baboon)	Control vs 3-month protocol	Control	3-month protocol	0	0.0213629	4.68101e-05	-14.3828	0.075637	0.075637
Endothelial cells (baboon)	6-month protocol vs 3-month protocol	6-month protocol	3-month protocol	0.313472	0.0213629	14.6736	3.87515	0.0886614	0.326015
Endothelial cells (baboon)	Prematurely terminated vs 3-month protocol	Prematurely terminated	3-month protocol	0.0376081	0.0213629	1.76044	0.815935	0.850179	0.886981
Endothelial cells (baboon)	PCMV/PRV vs 3-month protocol	PCMV/PRV	3-month protocol	0	0.0213629	4.68101e-05	-14.3828	0.216797	0.238477
Endothelial cells (baboon)	Rejection vs 3-month protocol	Rejection	3-month protocol	0.0332467	0.0213629	1.55628	0.638103	0.840924	0.993102
Fibroblasts	Control vs 3-month protocol	Control	3-month protocol	7.43826	7.81193	0.952166	-0.0707142	0.034791	0.0478377
Fibroblasts	6-month protocol vs 3-month protocol	6-month protocol	3-month protocol	6.2254	7.81193	0.796909	-0.327513	0.177826	0.326015
Fibroblasts	Prematurely terminated vs 3-month protocol	Prematurely terminated	3-month protocol	12.0583	7.81193	1.54358	0.626276	0.319949	0.43993
Fibroblasts	PCMV/PRV vs 3-month protocol	PCMV/PRV	3-month protocol	7.85597	7.81193	1.00564	0.00811091	0.131129	0.217437
Fibroblasts	Rejection vs 3-month protocol	Rejection	3-month protocol	14.9267	7.81193	1.91076	0.934144	0.706765	0.993102
Lymphoids (baboon)	Control vs 3-month protocol	Control	3-month protocol	0	2.73537	3.65581e-07	-21.3833	1.33184e-07	7.32509e-07
Lymphoids (baboon)	6-month protocol vs 3-month protocol	6-month protocol	3-month protocol	3.0283	2.73537	1.10709	0.146771	0.339105	0.466634
Lymphoids (baboon)	Prematurely terminated vs 3-month protocol	Prematurely terminated	3-month protocol	0.486484	2.73537	0.177849	-2.49127	0.00435682	0.015975
Lymphoids (baboon)	PCMV/PRV vs 3-month protocol	PCMV/PRV	3-month protocol	0.197168	2.73537	0.0720809	-3.79424	0.000364613	0.00275572
Lymphoids (baboon)	Rejection vs 3-month protocol	Rejection	3-month protocol	4.15836	2.73537	1.52022	0.60428	0.99763	0.99763
Mast cells (baboon)	Control vs 3-month protocol	Control	3-month protocol	0	0.0321187	3.11345e-05	-14.9711	0.0655801	0.0721381
Mast cells (baboon)	6-month protocol vs 3-month protocol	6-month protocol	3-month protocol	0.0643229	0.0321187	2.00266	1.00192	0.33937	0.466634
Mast cells (baboon)	Prematurely terminated vs 3-month protocol	Prematurely terminated	3-month protocol	0	0.0321187	3.11345e-05	-14.9711	0.0853455	0.134114
Mast cells (baboon)	PCMV vs 3-month protocol	PCMV/PRV	3-month protocol	0	0.0321187	3.11345e-05	-14.9711	0.188217	0.238477
Mast cells (baboon)	Rejection vs 3-month protocol	Rejection	3-month protocol	0.13506	0.0321187	4.20503	2.07212	0.501063	0.918616
Mural cells	Control vs 3-month protocol	Control	3-month protocol	3.18198	2.07937	1.53027	0.613782	3.29791e-05	7.25539e-05
Mural cells	6-month protocol vs 3-month protocol	6-month protocol	3-month protocol	3.34249	2.07937	1.60745	0.684777	0.946736	0.946736
Mural cells	Prematurely terminated vs 3-month protocol	Prematurely terminated	3-month protocol	5.47147	2.07937	2.63132	1.39578	0.0137271	0.0377495
Mural cells	PCMV/PRV vs 3-month protocol	PCMV/PRV	3-month protocol	2.95066	2.07937	1.41902	0.504891	0.00268657	0.00738807
Mural cells	Rejection vs 3-month protocol	Rejection	3-month protocol	2.06124	2.07937	0.991284	-0.0126299	0.281332	0.773662
Myeloids (baboon)	Control vs 3-month protocol	Control	3-month protocol	0	5.9545	1.6794e-07	-22.5055	8.92793e-09	9.82073e-08
Myeloids (baboon)	6-month protocol vs 3-month protocol	6-month protocol	3-month protocol	10.7064	5.9545	1.79803	0.846421	0.729327	0.80226
Myeloids (baboon)	Prematurely terminated vs 3-month protocol	Prematurely terminated	3-month protocol	0.300334	5.9545	0.0504382	-4.30934	0.000110209	0.0012123
Myeloids (baboon)	PCMV/PRV vs 3-month protocol	PCMV/PRV	3-month protocol	0.733202	5.9545	0.123134	-3.0217	0.000805118	0.0029521
Myeloids (baboon)	Rejection vs 3-month protocol	Rejection	3-month protocol	10.105	5.9545	1.69704	0.763019	0.826793	0.993102
Neuronal cells	Control vs 3-month protocol	Control	3-month protocol	0.740464	0.35542	2.08335	1.0589	1.23818e-05	3.40501e-05
Neuronal cells	6-month protocol vs 3-month protocol	6-month protocol	3-month protocol	0.31062	0.35542	0.87395	-0.194378	0.067183	0.326015
Neuronal cells	Prematurely terminated vs 3-month protocol	Prematurely terminated	3-month protocol	0.821136	0.35542	2.31032	1.20809	0.0500414	0.0917426
Neuronal cells	PCMV/PRV vs 3-month protocol	PCMV/PRV	3-month protocol	0.386401	0.35542	1.08717	0.120573	0.138369	0.217437
Neuronal cells	Rejection vs 3-month protocol	Rejection	3-month protocol	0.23722	0.35542	0.667435	-0.583301	0.0122067	0.134274
Resident Immune	Control vs 3-month protocol	Control	3-month protocol	4.93678	0.0435968	113.237	6.82321	4.45876e-06	1.63488e-05
Resident Immune	6-month protocol vs 3-month protocol	6-month protocol	3-month protocol	0.0312179	0.0435968	0.716059	-0.481849	0.636398	0.777819
Resident Immune	Prematurely terminated vs 3-month protocol	Prematurely terminated	3-month protocol	6.07569	0.0435968	139.361	7.12268	0.000539125	0.00296519
Resident Immune	PCMV/PRV vs 3-month protocol	PCMV/PRV	3-month protocol	1.5694	0.0435968	35.9981	5.16985	0.00050104	0.00275572
Resident Immune	Rejection vs 3-month protocol	Rejection	3-month protocol	0.672771	0.0435968	15.4317	3.94782	0.471732	0.918616
Vascular EC	Control vs 3-month protocol	Control	3-month protocol	3.79184	3.54527	1.06955	0.0970009	0.00113532	0.00208142
Vascular EC	6-month protocol vs 3-month protocol	6-month protocol	3-month protocol	3.16188	3.54527	0.89186	-0.165111	0.119021	0.326015
Vascular EC	Prematurely terminated vs 3-month protocol	Prematurely terminated	3-month protocol	8.21696	3.54527	2.31772	1.21271	0.0222601	0.0489722
Vascular EC	PCMV/PRV vs 3-month protocol	PCMV/PRV	3-month protocol	6.67485	3.54527	1.88275	0.912839	0.0521571	0.114746
Vascular EC	Rejection vs 3-month protocol	Rejection	3-month protocol	4.74743	3.54527	1.33909	0.421251	0.90282	0.993102
