# Supplementary material for: Integrated Molecular Profiling of Preclinical and Clinical Cardiac Xenotransplants
Source: Research Square preprint supplement (doi:10.21203/rs.3.rs-8406985/v1), 2026-02-04
Supplement: Supplementary file 38 [file cab0f6d211c24a9f2c81ec61.xlsx]

## Sheet: CM
Cell_State	Control	3-month protocol	6-month protocol	Prematurely terminated	PCMV/PRV	Rejection
vCM1	0.495428	0.411202	0.277694	0.370087	0.256192	0.328412
vCM2_ISG	0.153971	0.179503	0.220983	0.244508	0.305494	0.185668
Hypoxia_vCM	0.186749	0.178098	0.353812	0.155879	0.253731	0.280978
vCM3	0.136679	0.209563	0.133333	0.189631	0.15489	0.177976
vCM4	0.0195782	0.00836408	0.0073724	0.024072	0.0137345	0.0152513
vCM5	0.00409262	0.00769328	0.00113422	0.00892181	0.00849476	0.00764776
Prolif_vCM	0.00350269	0.00557605	0.00567108	0.00690178	0.00746269	0.00406702

## Sheet: FB
Cell_State	Control	3-month protocol	6-month protocol	Prematurely terminated	PCMV/PRV	Rejection
vFB4	0.126432	0.0901568	0.0598227	0.103618	0.154412	0.0783119
vFB8	0.0462185	0.0348432	0.0605613	0.0169719	0.0275735	0.0550666
Myo_vFB	0.00649351	0.0816638	0.177991	0.162126	0.183824	0.215978
Prolif_vFB	0.00534759	0.00544425	0.0324963	0.0343904	0.0165441	0.0444595
Homeostatic_vFB	0.525592	0.494556	0.226736	0.312193	0.176471	0.221846
Hypoxia_vFB	0.00305577	0.0261324	0.155835	0.0486824	0.104779	0.0819228
vFB3	0.105424	0.0949477	0.120384	0.0701206	0.0707721	0.110585
vFB6	0.0026738	0.0496516	0.0480059	0.0830728	0.0965074	0.106974
vFB5	0.173415	0.0851481	0.0443131	0.154087	0.0395221	0.0408486
vFB_ISG	0.00534759	0.0374564	0.0738552	0.0147387	0.129596	0.0440081

## Sheet: Vasc_EC
Cell_State	Control	3-month protocol	6-month protocol	Prematurely terminated	PCMV/PRV	Rejection
Anti_inflammatory_EC	0.231303	0.208696	0.135377	0.211172	0.0621242	0.118092
Prolif_EC	0.0185042	0.059335	0.0561941	0.0313351	0.00601202	0.0488656
Cap_EC	0.403238	0.171867	0.0472542	0.263624	0.0961924	0.104712
Meso_EC	0.0655359	0.0695652	0.0395913	0.0258856	0.0440882	0.0290867
Hypoxia_EC	0.0531997	0.212788	0.464879	0.262943	0.37976	0.398487
Angiogenic_EC	0.0724749	0.100256	0.083014	0.0974114	0.0581162	0.0884235
Arterial_EC	0.080185	0.0762148	0.0344828	0.0510899	0.0380762	0.0814427
NFkB_EC	0.0077101	0.0158568	0.0127714	0.0027248	0.01002	0.00814427
Cap_EC_ISG	0.0678489	0.085422	0.126437	0.0538147	0.266533	0.122164
EC_pCMVpos_sus	0	0	0	0	0.0390782	0.000581734

## Sheet: Res_Immune
Cell_State	Control	3-month protocol	6-month protocol	Prematurely terminated	PCMV/PRV	Rejection
MP_LYVE1hi_2.0_sus	0.0029656	0.0344828	0.142857	0.273388	0.244813	0.256881
MP_LYVE1hi_1.0_sus	0.209371	0.310345	0	0	0.0124481	0.0458716
MP_groundstate_sus	0.339858	0.586207	0	0.013624	0.0373444	0.123853
MP_SPP1_sus	0.00237248	0	0.142857	0.176203	0.248963	0.114679
MP_ISG_sus	0.0177936	0	0.285714	0.0217984	0.228216	0.330275
Prolif_Immune_sus	0.0243179	0	0.428571	0.0517711	0.0165975	0.00458716
MP_NFkB_sus	0.010083	0.0344828	0	0.0027248	0.00414938	0.00917431
MP_TREM2_sus	0.00652432	0.0344828	0	0.364214	0.178423	0.0825688
MO_CD16_sus	0.0581257	0	0	0.0590372	0.0207469	0
DC_sus	0.0255042	0	0	0.0027248	0	0
CD4T_naive_sus	0.039739	0	0	0.00726612	0	0
MP_pCMVpos_sus	0.00533808	0	0	0.00181653	0.00829876	0.0321101
NK_CD16hi_IFNhi_sus	0.0646501	0	0	0.00181653	0	0
NK_CD69hi_sus	0.0237248	0	0	0.0108992	0	0
CD8T_cytox_1_sus	0.0824437	0	0	0.00999092	0	0
CD8T_cytox_2_sus	0.0272835	0	0	0.000908265	0	0
NK_CD16hi_sus	0.014828	0	0	0.000908265	0	0
innate_lymphoid_cells_sus	0.0142349	0	0	0.000908265	0	0
unclassified_sus	0.0177936	0	0	0	0	0
B_cells_sus	0.0130486	0	0	0	0	0

## Sheet: Mye_papio
Cell_State	Control	3-month protocol	6-month protocol	Prematurely terminated	PCMV/PRV	Rejection
Mreg_DC_papio	0	0.00855432	0.00693241	0	0	0.00595855
MP_LYVE1hi_papio	0	0.262047	0.198007	0.0204082	0	0.123316
MP_ISG_papio	0	0.0707157	0.0758232	0.0204082	0.252252	0.124093
DC_papio	0	0.0282293	0.0220971	0.142857	0.027027	0.0349741
MP_LYVE1lo_papio	0	0.18905	0.133882	0.0204082	0.018018	0.177979
MP_TREM2_papio	0	0.0995153	0.120017	0.142857	0.315315	0.0803109
MP_GBE1_papio	0	0.0439122	0.194541	0.183673	0.189189	0.174611
Unclassified	0	0.0136869	0.0164645	0.204082	0.00900901	0.0173575
Monocytes_papio	0	0.0333618	0.0264298	0.244898	0.036036	0.0406736
MP_groundstate_papio	0	0.22783	0.167244	0.0204082	0.108108	0.179275
Prolif_Myeloids_papio	0	0.0173938	0.0342288	0	0.045045	0.0365285
MP_NFkB_papio	0	0.00570288	0.00433276	0	0	0.00492228

## Sheet: Lymph_papio
Cell_State	Control	3-month protocol	6-month protocol	Prematurely terminated	PCMV/PRV	Rejection
CD4T_act_papio	0	0.0810075	0.0469012	75	0.0645161	0.159048
Prolif_lymphoids_papio	0	0.0673928	0.0820771	25	0.0645161	0.0507201
NK_CD56hi_papio	0	0.182437	0.0904523	175	0.225806	0.0738885
CD8T_reg_papio	0	0.161334	0.221106	0.1625	0.0967742	0.134001
CD4T_naive_papio	0	0.0769231	0.0619765	0.2125	0.225806	0.0889167
MAIT-like_papio	0	0.023145	0.0335008	25	0	0.0651221
Unclassified	0	0.0496937	0.0586265	0	0.0645161	0.039449
CD4T_reg_papio	0	0.0816882	0.0653266	25	0	0.0795241
CD8T_cytox_papio	0	0.082369	0.0586265	25	0.0322581	0.205385
NK_CD16hi_papio	0	0.190606	0.273032	275	0.193548	0.097057
Plasmacells_papio	0	0.00340368	0.00837521	0	0.0322581	0.00688791
