# Supplementary material for: Integrated Molecular Profiling of Preclinical and Clinical Cardiac Xenotransplants
Source: Research Square preprint supplement (doi:10.21203/rs.3.rs-8406985/v1), 2026-02-04
Supplement: Supplementary file 39 [file cf3dcbdfe29fe44c80b663ec.xlsx]

## Sheet: Unclassified_lymph_papio
Gene	scores	log2FC	pvals	FDR
Papio_anubis_PLXDC2	6.14572	3.55368	7.96021e-10	2.14233e-05
Papio_anubis_QKI	4.88	1.73189	1.06085e-06	0.00815733
Papio_anubis_ETV6	4.74164	1.04534	2.11999e-06	0.0142638
Papio_anubis_SLC8A1	4.59677	2.31167	4.2909e-06	0.0209965
Papio_anubis_DOCK4	4.57427	2.91902	4.77885e-06	0.0214355
Papio_anubis_FMNL2	4.4873	2.95299	7.21315e-06	0.0298658
Papio_anubis_MEF2C	4.46544	3.0678	7.99038e-06	0.0307207
Papio_anubis_FYN	-4.59877	-0.943832	4.24991e-06	0.0209965
Papio_anubis_SKAP1	-4.68838	-0.851579	2.75372e-06	0.0164691
Papio_anubis_CD247	-5.21809	-0.956684	1.80775e-07	0.00162173
Papio_anubis_ABTB3	-5.33289	-1.31273	9.66643e-08	0.00104061
Papio_anubis_TXK	-5.71312	-1.38973	1.10922e-08	0.000149262
Papio_anubis_PTPRC	-5.99878	-0.774983	1.98803e-09	3.56693e-05
Papio_anubis_PRKCH	-6.17915	-1.01605	6.44478e-10	2.14233e-05

## Sheet: CD4T_act_papio
Gene	scores	log2FC	pvals	FDR
Papio_anubis_TOX	16.9737	1.61392	1.28518e-64	6.91759e-60
Papio_anubis_PDE7B	16.576	1.95647	1.03946e-61	2.79751e-57
Papio_anubis_INPP4B	15.6179	1.61918	5.50101e-55	9.8699e-51
Papio_anubis_ELMO1	15.1938	1.44867	3.88589e-52	5.22905e-48
Papio_anubis_ST6GALNAC3	14.9885	4.07879	8.72869e-51	9.39661e-47
Papio_anubis_IL6ST	14.6767	2.79406	9.09044e-49	8.15503e-45
Papio_anubis_AHI1	12.5102	1.34778	6.56495e-36	5.04807e-32
Papio_anubis_TSHZ2	12.2385	3.83994	1.93559e-34	1.15761e-30
Papio_anubis_FKBP5	10.8705	1.94575	1.59287e-27	8.57378e-24
Papio_anubis_AFF3	10.6755	1.41307	1.32512e-26	6.48417e-23
Papio_anubis_CCND3	10.611	1.12562	2.64963e-26	1.18849e-22
Papio_anubis_RBPJ	10.0186	1.27214	1.2622e-23	5.22611e-20
Papio_anubis_THADA	9.68036	1.18452	3.65441e-22	1.40502e-18
Papio_anubis_PHACTR2	9.58373	1.24878	9.35997e-22	3.35873e-18
Papio_anubis_ITGA4	8.99291	0.995663	2.40759e-19	8.09942e-16
Papio_anubis_TBL1X	8.76461	1.44672	1.87426e-18	5.93435e-15
Papio_anubis_APBB2	8.74841	2.24389	2.16374e-18	6.47031e-15
Papio_anubis_CAB39L	8.40556	2.49671	4.25834e-17	1.14605e-13
Papio_anubis_LDLRAD4	8.09608	1.58624	5.67588e-16	1.45481e-12
Papio_anubis_MSI2	7.82438	0.811489	5.10182e-15	1.09844e-11
Papio_anubis_PDE4D	7.55702	1.40249	4.12404e-14	8.2215e-11
Papio_anubis_CYTH1	7.1992	0.997615	6.05688e-13	1.1242e-09
Papio_anubis_LEF1	7.16637	1.61417	7.70119e-13	1.34659e-09
Papio_anubis_SORBS1	7.16541	2.11435	7.75542e-13	1.34659e-09
Papio_anubis_PCNX2	7.1224	2.44069	1.06066e-12	1.7841e-09
Papio_anubis_LMBR1	6.92968	1.48886	4.21798e-12	6.67755e-09
Papio_anubis_NR3C1	6.9031	1.04979	5.08791e-12	7.82463e-09
Papio_anubis_KCNQ5	6.81635	1.11425	9.33796e-12	1.3227e-08
Papio_anubis_DGKA	6.7454	1.45495	1.52611e-11	2.05361e-08
Papio_anubis_ZNF831	6.63197	1.51518	3.31225e-11	4.24488e-08
Papio_anubis_ASAP1	6.58307	0.999821	4.60818e-11	5.63727e-08
Papio_anubis_CPM	6.50801	1.68122	7.61549e-11	9.10914e-08
Papio_anubis_ANKRD26	6.24289	1.81608	4.29569e-10	4.81708e-07
Papio_anubis_RCSD1	6.19041	0.846188	6.00096e-10	6.59199e-07
Papio_anubis_DGKH	6.17301	1.201	6.70028e-10	7.21298e-07
Papio_anubis_TMEM131L	5.9764	0.872687	2.28126e-09	2.36137e-06
Papio_anubis_SESN3	5.91959	2.45041	3.22743e-09	3.15854e-06
Papio_anubis_ENSPANG00000017633	5.89991	1.01114	3.63698e-09	3.49579e-06
Papio_anubis_CASK	5.53879	0.983087	3.04564e-08	2.68745e-05
Papio_anubis_ZEB1	5.51577	0.941665	3.47251e-08	3.0147e-05
Papio_anubis_HIVEP1	5.38839	0.881703	7.10912e-08	5.79781e-05
Papio_anubis_ENSPANG00000004585	5.36799	1.66552	7.9619e-08	6.39638e-05
Papio_anubis_SLC9A9	5.26884	0.832206	1.37286e-07	0.00010867
Papio_anubis_SPATA5	5.25964	1.06758	1.44338e-07	0.000112596
Papio_anubis_FRMD4B	4.92217	1.71605	8.5591e-07	0.000598315
Papio_anubis_ENOX1	4.70011	3.28208	2.60023e-06	0.00162744
Papio_anubis_HBS1L	4.5896	1.32497	4.44104e-06	0.00265604
Papio_anubis_NCOA7	4.45474	0.845196	8.39942e-06	0.0046609
Papio_anubis_D2HGDH	4.38683	2.07784	1.15012e-05	0.00625319
Papio_anubis_ITGB1	4.22101	1.11992	2.43215e-05	0.0119482
Papio_anubis_ATXN7L1	4.22012	0.774543	2.44176e-05	0.0119482
Papio_anubis_CD109	4.19409	2.3548	2.73967e-05	0.0131665
Papio_anubis_IL7R	4.18443	1.19756	2.8588e-05	0.0136175
Papio_anubis_ESR2	4.17042	1.93051	3.04035e-05	0.0142304
Papio_anubis_TRIM9	4.10677	2.09049	4.01234e-05	0.0184588
Papio_anubis_BICDL1	4.09016	1.56227	4.31069e-05	0.0196633
Papio_anubis_ZFP69B	4.06001	1.22609	4.90714e-05	0.0221959
Papio_anubis_MYO3A	3.99618	3.01923	6.43718e-05	0.0279426
Papio_anubis_SLAMF1	3.98955	1.27909	6.61984e-05	0.0285055
Papio_anubis_BTLA	3.9352	3.50395	8.31287e-05	0.0355118
Papio_anubis_ENSPANG00000043703	3.927	2.25282	8.60112e-05	0.0364539
Papio_anubis_APP	3.91804	1.51806	8.92722e-05	0.0375404
Papio_anubis_RECK	3.91071	1.91341	9.20252e-05	0.0381027
Papio_anubis_SCN2A	3.88324	3.37095	0.000103072	0.0423508
Papio_anubis_PTPN13	3.87865	3.48702	0.000105036	0.0428307
Papio_anubis_ENSPANG00000019860	3.85265	1.33181	0.000116844	0.0469348
Papio_anubis_CD4	3.8442	2.1603	0.000120948	0.0482235
Papio_anubis_LDB2	-3.83511	-2.95761	0.000125507	0.049673
Papio_anubis_ENSPANG00000041348	-3.85604	-3.19695	0.000115237	0.0466374
Papio_anubis_SBF2	-3.91516	-1.30809	9.0346e-05	0.0376974
Papio_anubis_KIF25	-4.04319	-2.75453	5.27298e-05	0.0234565
Papio_anubis_DNAJC1	-4.04511	-0.905226	5.2299e-05	0.0234565
Papio_anubis_AFAP1L2	-4.23398	-3.65771	2.2959e-05	0.0114425
Papio_anubis_ENTREP2	-4.28752	-2.04789	1.80679e-05	0.0093512
Papio_anubis_MAN1C1	-4.32037	-2.64832	1.55769e-05	0.00822003
Papio_anubis_PIK3R1	-4.35672	-1.27475	1.32023e-05	0.00703591
Papio_anubis_SYTL2	-4.38383	-1.60918	1.16611e-05	0.00627668
Papio_anubis_ACOXL	-4.41413	-2.54154	1.01416e-05	0.00557023
Papio_anubis_CHN2	-4.52147	-1.76759	6.1411e-06	0.00344324
Papio_anubis_AOAH	-4.53651	-2.87806	5.71914e-06	0.00327488
Papio_anubis_PREX1	-4.53998	-1.18266	5.62608e-06	0.00327488
Papio_anubis_KLRB1	-4.57991	-26.9296	4.6517e-06	0.00275146
Papio_anubis_DENND1B	-4.61142	-0.960947	3.99936e-06	0.00241876
Papio_anubis_STK39	-4.63854	-0.846324	3.50871e-06	0.00214613
Papio_anubis_FCRL5	-4.74216	-3.47698	2.11451e-06	0.00135494
Papio_anubis_CD244	-4.82845	-5.31279	1.37599e-06	0.000903219
Papio_anubis_ENSPANG00000023803	-4.84662	-6.3567	1.25584e-06	0.00084496
Papio_anubis_MYO1F	-4.88473	-2.69632	1.03571e-06	0.000705674
Papio_anubis_PTPN22	-4.91592	-0.896469	8.83667e-07	0.000609798
Papio_anubis_MYO1D	-5.04984	-1.25326	4.42187e-07	0.000317349
Papio_anubis_VAV3	-5.06279	-0.936258	4.13167e-07	0.000300529
Papio_anubis_IL12RB2	-5.10165	-2.17513	3.36714e-07	0.000251722
Papio_anubis_RIN3	-5.18863	-1.46639	2.11844e-07	0.000160602
Papio_anubis_GZMB	-5.20617	-6.83848	1.92774e-07	0.000148232
Papio_anubis_RUNX3	-5.46466	-2.22238	4.63792e-08	3.84062e-05
Papio_anubis_GAS7	-5.48148	-1.72843	4.21777e-08	3.60359e-05
Papio_anubis_SAMD3	-5.62335	-4.85304	1.87286e-08	1.70862e-05
Papio_anubis_IKZF2	-5.62826	-2.18703	1.82041e-08	1.68941e-05
Papio_anubis_LYST	-5.70421	-1.48404	1.16882e-08	1.10373e-05
Papio_anubis_MTSS1	-5.93146	-2.46437	3.00249e-09	2.99282e-06

## Sheet: Prolif_lymphoids_papio
Gene	scores	log2FC	pvals	FDR
Papio_anubis_DIAPH3	13.0364	5.55016	7.59787e-39	4.08963e-34
Papio_anubis_BRCA2	12.5032	4.04863	7.16884e-36	1.92935e-31
Papio_anubis_EZH2	12.3046	3.03129	8.56019e-35	1.53587e-30
Papio_anubis_ASPM	12.0473	6.00339	2.0032e-33	2.6956e-29
Papio_anubis_SMC4	10.9784	2.68796	4.85417e-28	5.22561e-24
Papio_anubis_NSD2	10.5395	2.5278	5.67821e-26	5.09392e-22
Papio_anubis_ATAD2	9.95823	2.77011	2.32155e-23	1.78514e-19
Papio_anubis_MKI67	9.63959	5.4494	5.44058e-22	3.65522e-18
Papio_anubis_RAD51B	9.62764	1.56571	6.11173e-22	3.65522e-18
Papio_anubis_FANCI	8.97077	3.18184	2.9445e-19	1.58491e-15
Papio_anubis_TOP2A	8.48205	5.53929	2.21259e-17	9.92459e-14
Papio_anubis_POLQ	8.33724	4.69846	7.60458e-17	3.14865e-13
Papio_anubis_HELLS	8.19354	2.58743	2.53647e-16	9.752e-13
Papio_anubis_CENPE	8.16074	4.51736	3.32983e-16	1.19488e-12
Papio_anubis_BUB1B	8.12765	4.76086	4.37678e-16	1.4724e-12
Papio_anubis_POLA1	7.78921	1.82301	6.74294e-15	2.13497e-11
Papio_anubis_PRIM2	7.70597	1.88053	1.29851e-14	3.88297e-11
Papio_anubis_MIS18BP1	7.6777	3.56745	1.61972e-14	4.58857e-11
Papio_anubis_ENSPANG00000019454	7.63999	2.24848	2.17238e-14	5.84652e-11
Papio_anubis_MELK	7.62488	4.85644	2.44269e-14	6.26096e-11
Papio_anubis_CEP128	7.38975	1.75131	1.47105e-13	3.44265e-10
Papio_anubis_CEP192	7.31511	2.23519	2.57172e-13	5.76773e-10
Papio_anubis_KIF4A	7.10158	4.77438	1.23335e-12	2.65546e-09
Papio_anubis_CENPF	7.01012	3.88538	2.38111e-12	4.92945e-09
Papio_anubis_ENSPANG00000018738	6.97918	1.45107	2.9691e-12	5.91907e-09
Papio_anubis_NCAPD3	6.86283	2.21947	6.75114e-12	1.29781e-08
Papio_anubis_MMS22L	6.83921	3.0151	7.96322e-12	1.47803e-08
Papio_anubis_NCAPG	6.82006	5.11121	9.10031e-12	1.63278e-08
Papio_anubis_GTSE1	6.75582	5.38914	1.42034e-11	2.46618e-08
Papio_anubis_CKAP5	6.69229	2.2254	2.19712e-11	3.6957e-08
Papio_anubis_WWOX	6.67506	1.17665	2.4713e-11	4.03092e-08
Papio_anubis_KIF14	6.66746	5.85235	2.60274e-11	4.11161e-08
Papio_anubis_STAG1	6.66352	0.798276	2.67355e-11	4.11161e-08
Papio_anubis_TPX2	6.64368	5.51552	3.0594e-11	4.57431e-08
Papio_anubis_TACC3	6.50722	2.45996	7.65546e-11	1.11368e-07
Papio_anubis_FANCA	6.38624	2.92696	1.70012e-10	2.40817e-07
Papio_anubis_CIT	6.35095	4.00771	2.13983e-10	2.95329e-07
Papio_anubis_BRIP1	6.33618	4.45864	2.35529e-10	3.16939e-07
Papio_anubis_KIFC1	6.33063	5.37095	2.44168e-10	3.20551e-07
Papio_anubis_PRKCA	6.31803	0.752229	2.64926e-10	3.39521e-07
Papio_anubis_FAF1	6.12905	0.88237	8.84055e-10	1.10663e-06
Papio_anubis_KIF20B	5.9839	2.70882	2.17863e-09	2.66515e-06
Papio_anubis_MAD1L1	5.86366	1.53809	4.52764e-09	5.41567e-06
Papio_anubis_MAST2	5.83921	1.55965	5.24497e-09	6.1373e-06
Papio_anubis_RRM2	5.69331	5.36634	1.24601e-08	1.42697e-05
Papio_anubis_SGO2	5.65014	4.99595	1.60319e-08	1.79778e-05
Papio_anubis_CEP295	5.61265	1.81094	1.99255e-08	2.18879e-05
Papio_anubis_SYNE2	5.59918	2.09876	2.15371e-08	2.31851e-05
Papio_anubis_DPF3	5.57652	2.13588	2.45376e-08	2.58972e-05
Papio_anubis_CDCA2	5.55104	5.29541	2.83973e-08	2.93945e-05
Papio_anubis_CENPU	5.52559	4.40099	3.28377e-08	3.33494e-05
Papio_anubis_SMC2	5.46805	3.30473	4.55009e-08	4.53543e-05
Papio_anubis_NSMCE2	5.4359	0.985224	5.45209e-08	5.33571e-05
Papio_anubis_FANCC	5.42308	1.38153	5.85804e-08	5.63062e-05
Papio_anubis_RGS3	5.41138	1.69097	6.25407e-08	5.90581e-05
Papio_anubis_NCAPG2	5.3963	3.34	6.80302e-08	6.31343e-05
Papio_anubis_KNTC1	5.38438	3.78944	7.26949e-08	6.632e-05
Papio_anubis_CLSPN	5.37345	5.67378	7.72421e-08	6.92939e-05
Papio_anubis_VRK1	5.29009	1.82693	1.22254e-07	0.000107587
Papio_anubis_DNMT1	5.28761	2.05134	1.23925e-07	0.000107587
Papio_anubis_KIF11	5.27299	5.20189	1.34217e-07	0.000114225
Papio_anubis_CDK5RAP2	5.27082	1.43394	1.35816e-07	0.000114225
Papio_anubis_GMDS	5.26672	0.917418	1.3888e-07	0.000115006
Papio_anubis_KCNQ5	5.24134	0.99937	1.59418e-07	0.000128288
Papio_anubis_SPAG5	5.24103	5.32024	1.59686e-07	0.000128288
Papio_anubis_DDB2	5.21415	1.65453	1.84663e-07	0.000141995
Papio_anubis_HNRNPA2B1	5.1338	0.829206	2.83954e-07	0.000215269
Papio_anubis_SCLT1	5.09832	1.18507	3.42674e-07	0.000256178
Papio_anubis_NEIL3	5.07483	5.46251	3.87843e-07	0.000285973
Papio_anubis_DLGAP5	5.04975	5.46827	4.42382e-07	0.000321779
Papio_anubis_PDS5B	5.0379	1.29076	4.70674e-07	0.000336551
Papio_anubis_KNL1	5.03607	4.44388	4.75196e-07	0.000336551
Papio_anubis_MCPH1	5.0176	1.15819	5.2321e-07	0.000365744
Papio_anubis_SMC3	5.00969	1.66228	5.45189e-07	0.000376223
Papio_anubis_PNN	4.99625	0.992013	5.84566e-07	0.00039829
Papio_anubis_KIF15	4.97955	6.10435	6.37322e-07	0.000428806
Papio_anubis_ITGB3BP	4.9285	1.7381	8.28648e-07	0.000544282
Papio_anubis_STIL	4.92837	3.39254	8.29174e-07	0.000544282
Papio_anubis_DTL	4.88858	4.26417	1.01564e-06	0.000658645
Papio_anubis_NDC1	4.88353	2.33279	1.04205e-06	0.000667734
Papio_anubis_TTK	4.86624	3.90468	1.13742e-06	0.000716263
Papio_anubis_ATAD5	4.86503	3.34031	1.1444e-06	0.000716263
Papio_anubis_HNRNPH1	4.82183	0.954618	1.42249e-06	0.000880082
Papio_anubis_CDK19	4.79961	1.18385	1.58979e-06	0.000972407
Papio_anubis_BLM	4.7785	1.12678	1.76607e-06	0.00106809
Papio_anubis_KIF2C	4.7677	6.03786	1.8634e-06	0.00111444
Papio_anubis_CHEK1	4.76438	2.53582	1.89435e-06	0.0011205
Papio_anubis_PBX3	4.6984	1.07765	2.6221e-06	0.0015341
Papio_anubis_CBFB	4.67978	1.0546	2.87188e-06	0.00166217
Papio_anubis_RAD50	4.65849	1.44669	3.18543e-06	0.00178603
Papio_anubis_ANLN	4.65178	6.02725	3.29078e-06	0.00182608
Papio_anubis_POLE2	4.51222	3.43991	6.41541e-06	0.00348804
Papio_anubis_SETBP1	4.50796	0.929955	6.54529e-06	0.00352307
Papio_anubis_LMNB1	4.49189	2.50747	7.0595e-06	0.00376222
Papio_anubis_DYRK1A	4.48943	0.755375	7.14124e-06	0.00376847
Papio_anubis_ECT2	4.48239	3.59069	7.38118e-06	0.00385727
Papio_anubis_DEPDC1B	4.38003	4.86364	1.18661e-05	0.00608289
Papio_anubis_SPECC1L	4.37718	0.884438	1.20225e-05	0.00610495
Papio_anubis_CENPC	4.36172	1.3794	1.29042e-05	0.00649142
Papio_anubis_PRC1	4.3039	3.37571	1.67815e-05	0.00828697

## Sheet: CD8T_reg_papio
Gene	scores	log2FC	pvals	FDR
Papio_anubis_THEMIS	13.2405	1.30371	5.11832e-40	2.75499e-35
Papio_anubis_ACOXL	7.28209	1.61221	3.28694e-13	2.23444e-09
Papio_anubis_PAG1	6.29551	1.15773	3.06391e-10	1.2686e-06
Papio_anubis_CD96	4.29049	0.932663	1.78282e-05	0.0259357
Papio_anubis_MFHAS1	4.24284	0.901464	2.20712e-05	0.0297868
Papio_anubis_LEF1	-4.24218	-2.01688	2.21356e-05	0.0297868
Papio_anubis_AFAP1L2	-4.3392	-2.43675	1.43003e-05	0.0218861
Papio_anubis_LDLRAD4	-4.4151	-1.3483	1.00964e-05	0.0169827
Papio_anubis_ENSPANG00000023803	-4.73712	-2.26621	2.1678e-06	0.00486183
Papio_anubis_GPHN	-4.87371	-1.31498	1.09523e-06	0.00256311
Papio_anubis_DGKH	-5.33367	-1.58395	9.62489e-08	0.000287816
Papio_anubis_PAM	-6.51146	-1.12855	7.44257e-11	3.33837e-07
Papio_anubis_INPP4B	-6.51851	-0.800682	7.10099e-11	3.33837e-07
Papio_anubis_PHACTR2	-6.61612	-1.09651	3.68755e-11	1.98486e-07
Papio_anubis_PDE7B	-7.2807	-1.12607	3.32098e-13	2.23444e-09
Papio_anubis_KCNQ5	-7.32336	-1.76434	2.41839e-13	2.16954e-09
Papio_anubis_BACH2	-7.36512	-1.37011	1.76985e-13	1.90528e-09
Papio_anubis_AFF3	-8.1001	-1.69978	5.49127e-16	7.38933e-12
Papio_anubis_UBASH3B	-8.48118	-1.31452	2.22927e-17	3.99976e-13
Papio_anubis_TXK	-9.92459	-1.24783	3.25453e-23	8.75891e-19

## Sheet: CD4T_reg_papio
Gene	scores	log2FC	pvals	FDR
Papio_anubis_INPP4B	15.7835	1.90064	4.04093e-56	2.17507e-51
Papio_anubis_IKZF2	15.6485	2.84136	3.40049e-55	9.15175e-51
Papio_anubis_IL1RL2	13.8494	3.84744	1.2825e-43	2.30106e-39
Papio_anubis_PLCL1	12.199	3.07113	3.14529e-34	4.23246e-30
Papio_anubis_IL12RB2	11.9149	2.64073	9.89482e-33	1.0652e-28
Papio_anubis_SRPK2	11.7358	1.70223	8.35077e-32	7.49147e-28
Papio_anubis_THADA	11.2066	1.6045	3.78403e-29	2.9097e-25
Papio_anubis_TOX	10.4641	1.1592	1.26334e-25	6.80004e-22
Papio_anubis_IL2RA	9.53254	3.39655	1.53479e-21	6.88432e-18
Papio_anubis_RTKN2	9.35605	3.90296	8.27717e-21	3.42713e-17
Papio_anubis_ZC3H12D	8.63898	2.79298	5.67155e-18	2.18055e-14
Papio_anubis_ZNF831	8.05012	2.01373	8.27102e-16	2.78247e-12
Papio_anubis_LDLRAD4	7.89789	1.73644	2.83671e-15	8.98168e-12
Papio_anubis_NEBL	7.52915	3.76789	5.10702e-14	1.52717e-10
Papio_anubis_BCL11B	6.98278	1.09838	2.89399e-12	7.08055e-09
Papio_anubis_DUSP16	6.6004	1.77689	4.10051e-11	8.82857e-08
Papio_anubis_ARID5B	6.46848	1.25965	9.89963e-11	1.96058e-07
Papio_anubis_SMCHD1	6.46397	1.00871	1.01988e-10	1.96058e-07
Papio_anubis_AHI1	6.13213	0.756321	8.67126e-10	1.45856e-06
Papio_anubis_PHACTR2	5.77743	0.980118	7.58496e-09	1.13408e-05
Papio_anubis_ATXN7L1	5.62277	1.05103	1.87914e-08	2.66175e-05
Papio_anubis_ACVR1	5.61788	2.38425	1.93315e-08	2.66259e-05
Papio_anubis_FOXO1	5.58069	0.98807	2.39572e-08	3.14518e-05
Papio_anubis_SYNE2	5.46581	1.92647	4.60793e-08	5.5117e-05
Papio_anubis_PDE7B	5.41382	0.787733	6.16946e-08	7.06548e-05
Papio_anubis_IL6ST	5.3138	1.21049	1.07363e-07	0.000117937
Papio_anubis_FAM117B	5.23266	1.98153	1.67088e-07	0.000179874
Papio_anubis_ARHGAP10	5.20773	1.6228	1.91163e-07	0.000201755
Papio_anubis_PHF19	5.12125	1.61897	3.03523e-07	0.000314182
Papio_anubis_GRK3	5.06804	2.44161	4.01926e-07	0.00040819
Papio_anubis_IL1RL1	5.01414	3.5957	5.3272e-07	0.000531003
Papio_anubis_ETV6	5.00471	0.778079	5.59456e-07	0.000537737
Papio_anubis_ENSPANG00000024441	4.96636	1.64406	6.82197e-07	0.000642068
Papio_anubis_ICOS	4.77848	1.77666	1.76624e-06	0.00158025
Papio_anubis_ST6GAL1	4.66873	0.783149	3.03071e-06	0.00250971
Papio_anubis_MAP3K5	4.61986	1.09316	3.84003e-06	0.00300573
Papio_anubis_DPEP2	4.4899	1.34418	7.12555e-06	0.00504657
Papio_anubis_NCOA3	4.46022	0.967146	8.1875e-06	0.00566337
Papio_anubis_SLAMF1	4.45972	1.53245	8.20687e-06	0.00566337
Papio_anubis_MCC	4.38035	2.43157	1.1849e-05	0.00787391
Papio_anubis_TRAF3	4.35998	1.57122	1.30076e-05	0.00846157
Papio_anubis_TLK1	4.33817	0.922487	1.43672e-05	0.0092063
Papio_anubis_NAA15	4.33032	1.53215	1.4889e-05	0.00942844
Papio_anubis_CD28	4.22496	2.24762	2.38984e-05	0.0142929
Papio_anubis_NSD3	4.21821	0.893238	2.46253e-05	0.0144074
Papio_anubis_SLA	4.182	1.2489	2.88959e-05	0.0167242
Papio_anubis_TRPS1	4.17322	0.868982	3.00326e-05	0.0171972
Papio_anubis_FCRL5	-3.96069	-3.57523	7.47335e-05	0.0402261
Papio_anubis_PPP3CA	-4.0196	-0.776465	5.82961e-05	0.0316954
Papio_anubis_TGFBR2	-4.03229	-0.971192	5.52353e-05	0.0306505
Papio_anubis_RBMS1	-4.09996	-1.35379	4.13228e-05	0.0231692
Papio_anubis_IKZF3	-4.12224	-0.999834	3.75207e-05	0.0212588
Papio_anubis_RUNX3	-4.21835	-1.73487	2.46099e-05	0.0144074
Papio_anubis_GZMB	-4.3593	-26.9562	1.30478e-05	0.00846157
Papio_anubis_SAMD3	-4.43999	-3.90411	8.9962e-06	0.00612949
Papio_anubis_ENSPANG00000039410	-4.49705	-1.33307	6.89029e-06	0.00494502
Papio_anubis_CD96	-4.50189	-4.06888	6.73522e-06	0.00489905
Papio_anubis_PDZRN3	-4.50422	-1.2339	6.66159e-06	0.00489905
Papio_anubis_CHN2	-4.52966	-2.36257	5.90793e-06	0.00441667
Papio_anubis_RBPJ	-4.53464	-0.993863	5.77025e-06	0.0043745
Papio_anubis_PTPN22	-4.58337	-0.954864	4.57548e-06	0.00351828
Papio_anubis_ENTREP2	-4.61915	-3.60088	3.85307e-06	0.00300573
Papio_anubis_PDGFD	-4.6707	-2.28625	3.00179e-06	0.00250971
Papio_anubis_PAG1	-4.67812	-2.38243	2.89511e-06	0.00247352
Papio_anubis_SFMBT2	-4.7757	-2.17403	1.79087e-06	0.00158025
Papio_anubis_VAV3	-5.00772	-1.08403	5.50779e-07	0.000537737
Papio_anubis_RIN3	-5.38732	-1.97573	7.15177e-08	8.01982e-05
Papio_anubis_SYNE1	-5.4226	-1.26531	5.87394e-08	6.87328e-05
Papio_anubis_TGFBR3	-5.52509	-3.99151	3.29314e-08	4.12225e-05
Papio_anubis_SYTL3	-5.55438	-1.55626	2.78599e-08	3.57045e-05
Papio_anubis_HIP1	-5.61386	-1.67844	1.97866e-08	2.66259e-05
Papio_anubis_AFF3	-5.85213	-1.82273	4.8532e-09	7.46366e-06
Papio_anubis_ZEB2	-5.95097	-2.05884	2.66564e-09	4.22002e-06
Papio_anubis_SCML4	-6.05419	-1.43512	1.41124e-09	2.30186e-06
Papio_anubis_GAS7	-6.15348	-3.03151	7.5801e-10	1.31615e-06
Papio_anubis_SNTB1	-6.28467	-3.06696	3.28547e-10	5.89479e-07
Papio_anubis_KLRC1	-6.30223	-6.56153	2.93397e-10	5.44565e-07
Papio_anubis_PIP4K2A	-6.47436	-0.983822	9.52171e-11	1.96058e-07
Papio_anubis_TXK	-6.77703	-1.32232	1.22672e-11	2.75123e-08
Papio_anubis_KLRD1	-6.83836	-4.06422	8.01034e-12	1.87463e-08
Papio_anubis_KLRK1	-7.04887	-4.93866	1.80381e-12	4.62342e-09
Papio_anubis_CMIP	-7.10218	-1.66744	1.22803e-12	3.30499e-09
Papio_anubis_DOCK10	-7.32864	-1.28299	2.32504e-13	6.5867e-10
Papio_anubis_MAML2	-8.40502	-1.47196	4.27807e-17	1.53514e-13
Papio_anubis_PARP8	-10.3961	-2.23616	2.58345e-25	1.26415e-21
Papio_anubis_PITPNC1	-10.7367	-1.8373	6.84637e-27	4.09459e-23
Papio_anubis_THEMIS	-10.8039	-2.73097	3.29715e-27	2.2184e-23

## Sheet: MAIT-like_papio
Gene	scores	log2FC	pvals	FDR
Papio_anubis_PDZRN3	13.316	2.52889	1.86781e-40	1.00537e-35
Papio_anubis_EML4	12.6356	1.87031	1.34418e-36	3.61758e-32
Papio_anubis_ENSPANG00000017172	10.3396	2.6819	4.66406e-25	8.36825e-21
Papio_anubis_PLXNC1	9.09499	2.59229	9.45941e-20	1.27291e-15
Papio_anubis_KIF25	8.8376	2.50578	9.77975e-19	1.05281e-14
Papio_anubis_AOPEP	8.78255	1.74223	1.59814e-18	1.43369e-14
Papio_anubis_SATB1	8.74332	2.01582	2.26349e-18	1.7405e-14
Papio_anubis_ABTB3	8.59411	1.41783	8.39133e-18	5.6459e-14
Papio_anubis_ZBTB16	8.282	2.65478	1.21125e-16	7.2441e-13
Papio_anubis_RUNX2	8.13879	1.98972	3.99253e-16	2.14902e-12
Papio_anubis_MTSS1	8.10943	1.91386	5.08589e-16	2.48866e-12
Papio_anubis_TNIK	7.99736	1.00852	1.27117e-15	5.70183e-12
Papio_anubis_PAG1	7.35671	1.77047	1.88493e-13	7.26574e-10
Papio_anubis_DUSP16	7.35631	2.35357	1.89069e-13	7.26574e-10
Papio_anubis_SYTL3	7.25269	1.33809	4.08576e-13	1.3745e-09
Papio_anubis_KCNK13	7.21992	2.06897	5.20191e-13	1.64705e-09
Papio_anubis_ADAM12	7.04331	4.70113	1.87732e-12	5.6138e-09
Papio_anubis_IL7R	6.97461	2.29931	3.06718e-12	8.68917e-09
Papio_anubis_KLRB1	6.79945	2.1982	1.05023e-11	2.82648e-08
Papio_anubis_STAT4	6.60715	1.16094	3.91785e-11	9.87529e-08
Papio_anubis_PARP8	6.60274	1.07394	4.03627e-11	9.87529e-08
Papio_anubis_IKZF2	6.55443	1.42487	5.5853e-11	1.3071e-07
Papio_anubis_TGFBR3	6.29819	1.58659	3.01137e-10	6.75376e-07
Papio_anubis_SH3KBP1	6.22564	1.05704	4.79589e-10	1.03257e-06
Papio_anubis_SYTL2	6.19832	1.70889	5.70692e-10	1.18146e-06
Papio_anubis_CDC14A	6.06215	1.32393	1.34311e-09	2.67756e-06
Papio_anubis_NIBAN1	5.93863	1.29185	2.87415e-09	5.33463e-06
Papio_anubis_CAMK4	5.54244	0.889102	2.98288e-08	5.17924e-05
Papio_anubis_HDAC4	5.52346	1.29827	3.32392e-08	5.59105e-05
Papio_anubis_SORL1	5.39667	0.905686	6.78888e-08	0.000107476
Papio_anubis_MED12L	5.26158	4.31128	1.42823e-07	0.000219645
Papio_anubis_IL23R	5.1368	4.93013	2.79464e-07	0.000417845
Papio_anubis_MAP3K8	5.08171	2.48142	3.74061e-07	0.000544167
Papio_anubis_DPP4	4.94817	2.05697	7.49138e-07	0.0010355
Papio_anubis_MFHAS1	4.82339	1.48825	1.41141e-06	0.00189926
Papio_anubis_PIK3R1	4.75503	1.20616	1.98421e-06	0.00260493
Papio_anubis_TMEM132C	4.7442	6.39128	2.09331e-06	0.00268273
Papio_anubis_KAT6A	4.60225	0.857526	4.17949e-06	0.00511284
Papio_anubis_SENP7	4.59584	1.03888	4.31014e-06	0.0051555
Papio_anubis_RNF149	4.55428	1.24583	5.25654e-06	0.00615083
Papio_anubis_PDE4B	4.50353	1.20184	6.68346e-06	0.00765412
Papio_anubis_SMAD3	4.45014	0.919394	8.58127e-06	0.00962282
Papio_anubis_AFDN	4.39405	1.99646	1.11256e-05	0.0122214
Papio_anubis_RERE	4.37311	0.799524	1.2249e-05	0.0131863
Papio_anubis_ERN1	4.28369	1.96467	1.83819e-05	0.0194005
Papio_anubis_MAN1C1	4.24213	1.52698	2.21406e-05	0.0229181
Papio_anubis_MAP2K6	4.20365	1.81788	2.62644e-05	0.0261797
Papio_anubis_GNG2	4.14018	0.79479	3.47028e-05	0.033962
Papio_anubis_RBMS1	4.1073	0.982455	4.0031e-05	0.0378019
Papio_anubis_SMAP1	4.09132	0.989469	4.2892e-05	0.0398053
Papio_anubis_CMIP	4.05162	0.765722	5.08646e-05	0.0464041
Papio_anubis_KCNQ5	-4.23205	-2.3427	2.31573e-05	0.0235182
Papio_anubis_TXK	-4.61122	-1.19146	4.00307e-06	0.00501092
Sus_scrofa___TTN	-5.587	-1.3205	2.31026e-08	4.14508e-05
Papio_anubis_TOX	-6.04818	-1.23441	1.46494e-09	2.81613e-06
Papio_anubis_INPP4B	-7.34715	-2.12489	2.02479e-13	7.26574e-10

## Sheet: NK_CD56hi_papio
Gene	scores	log2FC	pvals	FDR
Papio_anubis_AFF3	18.5555	2.32367	7.36678e-77	3.96524e-72
Papio_anubis_LDB2	17.3137	3.59123	3.70727e-67	9.97737e-63
Papio_anubis_AOAH	14.4376	2.85726	3.00271e-47	5.38746e-43
Papio_anubis_KLRB1	14.3786	3.2923	7.04625e-47	9.48179e-43
Papio_anubis_ABTB3	13.6668	1.53862	1.60272e-42	1.4378e-38
Papio_anubis_KLRD1	11.7935	1.64564	4.21456e-32	3.24076e-28
Papio_anubis_TXK	11.1571	1.1018	6.60842e-29	4.44631e-25
Papio_anubis_PLCG2	10.9486	2.33732	6.74978e-28	4.03682e-24
Papio_anubis_KLRC1	10.4595	1.71637	1.32532e-25	7.13365e-22
Papio_anubis_PDE8A	9.38109	1.79809	6.52953e-21	2.92882e-17
Papio_anubis_VAV3	9.07681	1.01991	1.11799e-19	4.62899e-16
Papio_anubis_CD244	8.57003	1.91379	1.03461e-17	3.97779e-14
Papio_anubis_IL12RB2	8.54414	1.39132	1.29501e-17	4.64702e-14
Papio_anubis_CD300LF	8.51991	3.16239	1.59676e-17	5.37169e-14
Papio_anubis_MTSS1	8.45812	1.43033	2.7173e-17	8.60362e-14
Papio_anubis_PTGER3	8.30604	4.17593	9.89515e-17	2.95898e-13
Papio_anubis_MCTP2	8.28366	1.92468	1.19447e-16	3.29008e-13
Papio_anubis_EML4	8.15471	0.797821	3.50019e-16	8.97149e-13
Papio_anubis_STAT4	7.99624	0.884109	1.28273e-15	3.13838e-12
Papio_anubis_PLXNC1	7.98351	1.85702	1.42225e-15	3.32842e-12
Papio_anubis_SAMD3	7.89754	1.62115	2.8446e-15	6.12455e-12
Papio_anubis_ENSPANG00000023803	7.77507	1.72099	7.54061e-15	1.56108e-11
Papio_anubis_KALRN	7.55289	1.67667	4.25698e-14	8.48654e-11
Papio_anubis_RGS9	7.40029	2.69996	1.3589e-13	2.61229e-10
Papio_anubis_ZBTB16	7.37741	1.77343	1.61401e-13	2.99571e-10
Papio_anubis_TGFBR3	7.23655	1.37178	4.60237e-13	8.25758e-10
Papio_anubis_RAB37	7.20197	1.53439	5.93487e-13	1.03048e-09
Papio_anubis_CHN2	7.19262	1.36596	6.35607e-13	1.06913e-09
Papio_anubis_FCRL5	7.16949	1.61682	7.5279e-13	1.22787e-09
Papio_anubis_SYK	7.15236	2.23091	8.53006e-13	1.35041e-09
Papio_anubis_ARHGAP26	6.96456	1.17596	3.29443e-12	5.06646e-09
Papio_anubis_AOPEP	6.62659	0.882522	3.4353e-11	4.99753e-08
Papio_anubis_CD38	6.45708	1.55984	1.06741e-10	1.51195e-07
Papio_anubis_SNTB1	5.91927	0.912752	3.2337e-09	4.08789e-06
Papio_anubis_KLRK1	5.91765	0.866673	3.26569e-09	4.08789e-06
Papio_anubis_ENSPANG00000034967	5.83284	1.56433	5.44913e-09	6.66602e-06
Papio_anubis_PDGFD	5.82746	0.995694	5.62779e-09	6.73159e-06
Papio_anubis_SBF2	5.73006	1.01154	1.00397e-08	1.17478e-05
Papio_anubis_CD44	5.61092	0.776771	2.01259e-08	2.30489e-05
Papio_anubis_GNAQ	5.59794	0.834963	2.16919e-08	2.39037e-05
Papio_anubis_ENSPANG00000017728	5.59739	1.61058	2.17605e-08	2.39037e-05
Papio_anubis_GZMB	5.44574	1.24137	5.15899e-08	5.34015e-05
Papio_anubis_RIN3	5.28848	0.876307	1.23334e-07	0.000120702
Papio_anubis_ATP8A1	5.26738	0.90439	1.38381e-07	0.000133009
Papio_anubis_CUX1	5.23326	0.759211	1.66547e-07	0.000157273
Papio_anubis_TBC1D8	5.18285	2.31314	2.18524e-07	0.00020137
Papio_anubis_GNLY	5.18098	2.40674	2.20727e-07	0.00020137
Papio_anubis_MAP3K8	5.11816	2.053	3.08538e-07	0.000276789
Papio_anubis_NCAM1	5.07151	3.08694	3.94676e-07	0.000342643
Papio_anubis_ADGRG5	5.00572	1.62368	5.56533e-07	0.000468061
Papio_anubis_MGAT5	4.90697	1.53147	9.24927e-07	0.000732134
Papio_anubis_SLC24A3	4.90154	2.44819	9.50863e-07	0.000741755
Papio_anubis_MAML3	4.84057	1.26084	1.29467e-06	0.000995525
Papio_anubis_ANO10	4.8343	1.61223	1.33616e-06	0.00100222
Papio_anubis_NEIL1	4.7387	1.98701	2.15096e-06	0.00152339
Papio_anubis_CTBP2	4.65909	1.90534	3.17614e-06	0.00222024
Papio_anubis_ANKRD6	4.44567	1.22911	8.76184e-06	0.00554841
Papio_anubis_TCF7	4.43673	1.33533	9.13366e-06	0.00571661
Papio_anubis_IGF1R	4.19619	1.76836	2.71445e-05	0.0162342
Papio_anubis_SEL1L3	4.16282	1.38262	3.14347e-05	0.0185935
Papio_anubis_E2F3	4.0841	0.933881	4.42488e-05	0.0250709
Papio_anubis_MICU3	4.03964	2.7045	5.35339e-05	0.0294032
Papio_anubis_UXS1	4.01685	0.85195	5.89814e-05	0.031433
Papio_anubis_SEPTIN11	4.00706	1.14478	6.14784e-05	0.0324425
Papio_anubis_PRKN	3.96822	1.38454	7.24125e-05	0.0371207
Papio_anubis_ENSPANG00000004762	3.91032	1.25781	9.21729e-05	0.0468047
Papio_anubis_ARID5B	-3.9861	-1.01719	6.71682e-05	0.0347634
Papio_anubis_LDLRAD4	-4.02705	-1.45966	5.64821e-05	0.0307091
Papio_anubis_PLCL1	-4.0682	-3.26267	4.73784e-05	0.0265645
Papio_anubis_SLAMF1	-4.1515	-4.50793	3.30301e-05	0.0193027
Papio_anubis_ALCAM	-4.19744	-2.87574	2.69946e-05	0.0162342
Papio_anubis_SAMSN1	-4.29861	-1.18703	1.71874e-05	0.0105128
Papio_anubis_ATXN7L1	-4.51278	-1.19863	6.39836e-06	0.00409998
Papio_anubis_MAP3K5	-4.58835	-1.54237	4.4676e-06	0.0029688
Papio_anubis_DUSP16	-4.73986	-3.09566	2.13865e-06	0.00152339
Papio_anubis_ZNF831	-4.83364	-3.3266	1.34061e-06	0.00100222
Papio_anubis_ZEB2	-4.90864	-1.21352	9.17109e-07	0.000732134
Papio_anubis_ENSPANG00000017633	-5.05645	-1.20679	4.27127e-07	0.000364929
Papio_anubis_PHACTR2	-5.49335	-1.12739	3.94384e-08	4.16238e-05
Papio_anubis_RBPJ	-6.17037	-1.15842	6.81289e-10	9.16776e-07
Papio_anubis_SRPK2	-6.30304	-1.17374	2.91861e-10	4.02813e-07
Papio_anubis_DGKH	-6.93362	-3.86386	4.10195e-12	6.1331e-09
Papio_anubis_PDE7B	-8.2809	-1.60492	1.22249e-16	3.29008e-13
Papio_anubis_BCL11B	-9.89196	-2.77991	4.51111e-23	2.20741e-19
Papio_anubis_INPP4B	-14.1274	-2.57317	2.57626e-45	2.7734e-41

## Sheet: CD8T_cytox_papio
Gene	scores	log2FC	pvals	FDR
Papio_anubis_PDE7B	17.6511	1.95099	9.97303e-70	5.36808e-65
Papio_anubis_CBLB	16.548	1.24807	1.65645e-61	4.45801e-57
Papio_anubis_UBASH3B	14.6244	1.60896	1.96177e-48	3.38507e-44
Papio_anubis_DGKH	14.6075	2.38517	2.51556e-48	3.38507e-44
Papio_anubis_KCNK13	13.7713	2.54518	3.79235e-43	4.08254e-39
Papio_anubis_PRKCA	13.6969	1.1803	1.0589e-42	9.49938e-39
Papio_anubis_ZDHHC14	12.7527	2.1553	3.01087e-37	2.31519e-33
Papio_anubis_KLRC1	12.69	2.09925	6.7156e-37	4.51842e-33
Papio_anubis_AHI1	12.6494	1.21858	1.12709e-36	6.74077e-33
Papio_anubis_TSPAN5	11.7364	1.21614	8.28977e-32	4.46205e-28
Papio_anubis_PAM	10.9352	1.40187	7.82203e-28	3.82753e-24
Papio_anubis_TOX	10.396	0.896255	2.58531e-25	1.15964e-21
Papio_anubis_ITGA1	9.97777	2.86694	1.90702e-23	7.89595e-20
Papio_anubis_BCL2	9.66374	0.909341	4.29875e-22	1.65275e-18
Papio_anubis_PHACTR2	9.02668	1.1458	1.76963e-19	6.35013e-16
Papio_anubis_KLRK1	8.3674	1.34393	5.89033e-17	1.7614e-13
Papio_anubis_GRAMD1B	7.68515	1.48483	1.52816e-14	3.9169e-11
Papio_anubis_TXK	7.53825	0.789222	4.76315e-14	1.16537e-10
Papio_anubis_OPRM1	7.34055	1.41631	2.12717e-13	4.97812e-10
Papio_anubis_PDE4B	7.33157	1.56958	2.27469e-13	5.10157e-10
Papio_anubis_RBPJ	7.28044	0.904727	3.32743e-13	7.16408e-10
Papio_anubis_MDFIC	7.12331	1.19897	1.05366e-12	2.10053e-09
Papio_anubis_IPCEF1	7.01135	1.11281	2.36035e-12	4.53744e-09
Papio_anubis_ENTREP2	6.78807	1.43112	1.13646e-11	2.10934e-08
Papio_anubis_PDZRN3	6.71532	0.80805	1.87655e-11	3.36691e-08
Papio_anubis_GAS7	6.65373	1.1502	2.85749e-11	4.96152e-08
Papio_anubis_SAMSN1	6.52441	1.0479	6.82678e-11	1.08076e-07
Papio_anubis_CASK	6.21143	1.09585	5.25044e-10	7.24641e-07
Papio_anubis_TRIM9	6.09459	2.64601	1.09719e-09	1.47644e-06
Papio_anubis_NIN	5.89597	1.23935	3.72478e-09	4.55659e-06
Papio_anubis_MAGI3	5.86233	2.10772	4.56418e-09	5.45937e-06
Papio_anubis_CD96	5.7591	1.2771	8.45632e-09	9.68446e-06
Papio_anubis_BACH2	5.63163	0.805564	1.78514e-08	1.92174e-05
Papio_anubis_ENSPANG00000017633	5.37442	0.85296	7.68311e-08	7.80285e-05
Papio_anubis_CDK6	5.21635	1.19869	1.82479e-07	0.000181891
Papio_anubis_SETBP1	5.09053	0.882337	3.5706e-07	0.000343198
Papio_anubis_PTPRR	5.03187	2.40512	4.85729e-07	0.000450773
Papio_anubis_GPD2	4.7558	1.02847	1.9766e-06	0.00158795
Papio_anubis_GFOD1	4.61086	1.17584	4.01e-06	0.00304003
Papio_anubis_ENSPANG00000037408	4.48576	1.23814	7.26563e-06	0.00528486
Papio_anubis_AGBL4	4.47867	2.85114	7.51098e-06	0.00539048
Papio_anubis_FAM3C	4.47174	1.49939	7.75858e-06	0.00542355
Papio_anubis_HIPK2	4.46773	1.09205	7.90543e-06	0.00545535
Papio_anubis_GTDC1	4.45358	0.998348	8.44499e-06	0.005682
Papio_anubis_PTPN12	4.29634	1.27741	1.73639e-05	0.0111265
Papio_anubis_DNAI3	4.14	1.95349	3.47312e-05	0.0214879
Papio_anubis_TNFSF11	4.06689	2.25862	4.76445e-05	0.0280783
Papio_anubis_HPGDS	4.0652	2.98344	4.79917e-05	0.0280783
Papio_anubis_UGCG	4.04321	1.19564	5.27252e-05	0.0301913
Papio_anubis_ITGA9	3.99724	2.31038	6.40852e-05	0.0355614
Papio_anubis_NCALD	3.99285	1.00387	6.52836e-05	0.0358567
Papio_anubis_HK3	3.93009	3.6705	8.49159e-05	0.0461685
Papio_anubis_SATB1	-4.03828	-1.15983	5.38441e-05	0.0303997
Papio_anubis_RASSF3	-4.09971	-1.33196	4.13666e-05	0.0249792
Papio_anubis_RRAS2	-4.18409	-2.62994	2.86311e-05	0.0179197
Papio_anubis_CDC14A	-4.25443	-0.986532	2.09581e-05	0.0132716
Papio_anubis_MFHAS1	-4.39193	-1.56019	1.1235e-05	0.00737479
Papio_anubis_IL7R	-4.45623	-4.07522	8.34127e-06	0.005682
Papio_anubis_RAP1GAP2	-4.51993	-3.15697	6.18589e-06	0.00456112
Papio_anubis_SAMD3	-4.64215	-2.05197	3.44809e-06	0.00265138
Papio_anubis_ARHGAP26	-4.73521	-1.24337	2.18823e-06	0.00170701
Papio_anubis_MAP4K4	-4.80462	-0.883078	1.55045e-06	0.00128392
Papio_anubis_KLRB1	-4.8876	-5.21351	1.02075e-06	0.000886176
Papio_anubis_EXOC6B	-4.95466	-0.904886	7.24562e-07	0.000639349
Papio_anubis_IL12RB2	-4.96431	-1.50622	6.89459e-07	0.000618514
Papio_anubis_CUX1	-5.00733	-0.991682	5.5189e-07	0.000503492
Papio_anubis_EPB41	-5.0379	-0.776421	4.70657e-07	0.000444449
Papio_anubis_PAG1	-5.47016	-1.93423	4.49633e-08	4.65422e-05
Papio_anubis_IKZF2	-5.53934	-1.71378	3.03611e-08	3.20434e-05
Papio_anubis_BCL11B	-5.64874	-1.08313	1.61626e-08	1.77545e-05
Papio_anubis_PRKCB	-5.83671	-1.07283	5.32429e-09	6.23011e-06
Papio_anubis_SORL1	-5.97137	-0.815803	2.35265e-09	2.94497e-06
Papio_anubis_CAMK4	-6.21428	-0.969551	5.15596e-10	7.24641e-07
Papio_anubis_ATXN7L1	-6.26524	-1.7797	3.72252e-10	5.41537e-07
Papio_anubis_AFF3	-6.59894	-1.36217	4.14095e-11	6.96534e-08
Sus_scrofa___TTN	-7.16273	-0.897328	7.9089e-13	1.63732e-09
Papio_anubis_IQGAP2	-7.70705	-0.918973	1.28756e-14	3.4652e-11
Papio_anubis_GNAQ	-8.14535	-2.19157	3.78198e-16	1.07141e-12
Papio_anubis_SLCO3A1	-8.91984	-2.1067	4.66965e-19	1.57093e-15

## Sheet: NK_CD16hi_papio
Gene	scores	log2FC	pvals	FDR
Papio_anubis_ZEB2	16.6382	2.11174	3.6852e-62	1.9836e-57
Papio_anubis_VAV3	15.849	1.70685	1.42936e-56	3.84684e-52
Papio_anubis_AFAP1L2	14.2728	3.05923	3.23267e-46	5.80006e-42
Papio_anubis_KLRD1	11.9333	1.67485	7.93914e-33	1.0043e-28
Papio_anubis_ENSPANG00000023803	11.5416	2.42697	8.13968e-31	6.25895e-27
Papio_anubis_PITPNC1	10.7032	0.868352	9.83499e-27	5.29378e-23
Papio_anubis_TXK	10.6847	1.03673	1.19985e-26	5.8712e-23
Papio_anubis_SCML4	9.52643	1.06377	1.62778e-21	6.25833e-18
Papio_anubis_UBASH3B	9.08386	1.0189	1.04794e-19	3.52539e-16
Papio_anubis_SETBP1	8.72088	1.48801	2.76041e-18	8.25455e-15
Papio_anubis_SYTL3	8.58593	1.0373	9.01009e-18	2.42488e-14
Papio_anubis_ENSPANG00000006422	8.43028	0.845285	3.44832e-17	8.5446e-14
Papio_anubis_SNTB1	8.4288	1.269	3.49239e-17	8.5446e-14
Papio_anubis_RIN3	7.9922	1.16427	1.32549e-15	3.10198e-12
Papio_anubis_PPP3CA	7.81667	0.863797	5.4239e-15	1.16779e-11
Papio_anubis_ENTREP2	7.79643	1.53158	6.36842e-15	1.31841e-11
Papio_anubis_GRK5	7.38602	1.28655	1.51288e-13	2.62685e-10
Papio_anubis_FCRL5	7.03867	1.55051	1.94084e-12	3.07257e-09
Papio_anubis_STK39	6.8355	0.807099	8.17168e-12	1.25671e-08
Papio_anubis_TESC	6.50854	1.96676	7.58864e-11	1.07491e-07
Papio_anubis_GZMB	6.48293	1.55848	8.99567e-11	1.24154e-07
Papio_anubis_PDGFD	6.23489	1.14765	4.5211e-10	5.79411e-07
Papio_anubis_CD38	6.19645	1.60894	5.77512e-10	7.22911e-07
Papio_anubis_SAMD3	6.05228	1.24737	1.42807e-09	1.71585e-06
Papio_anubis_SLCO3A1	6.01126	0.813943	1.84091e-09	2.1541e-06
Papio_anubis_PPP3CC	5.84434	0.86377	5.08584e-09	5.58675e-06
Papio_anubis_ENSPANG00000015755	5.76289	1.71054	8.26867e-09	8.72685e-06
Papio_anubis_UBE2F	5.72501	1.5874	1.03425e-08	1.07057e-05
Papio_anubis_FBXW7	5.70385	0.766781	1.17132e-08	1.18958e-05
Papio_anubis_CLNK	5.55253	2.00062	2.81559e-08	2.69479e-05
Papio_anubis_BABAM2	5.49014	0.815795	4.01615e-08	3.54383e-05
Papio_anubis_CD244	5.40907	1.30658	6.33526e-08	5.41273e-05
Papio_anubis_RAP1GAP2	5.28384	1.44214	1.26502e-07	0.000103168
Papio_anubis_TGFBR3	5.27876	1.07837	1.3006e-07	0.000103368
Papio_anubis_LITAF	5.26049	1.66437	1.43674e-07	0.000112078
Papio_anubis_PIK3AP1	5.16813	1.75911	2.36445e-07	0.000176762
Papio_anubis_ENSPANG00000001889	4.82779	1.47147	1.38057e-06	0.000895307
Papio_anubis_MCTP2	4.82042	1.16119	1.43256e-06	0.000917967
Papio_anubis_INPP4A	4.80417	0.967733	1.55392e-06	0.000972572
Papio_anubis_ARHGEF12	4.75363	2.10005	1.99798e-06	0.0011825
Papio_anubis_CYRIA	4.53072	2.21801	5.87822e-06	0.00322858
Papio_anubis_ADCY9	4.49347	1.13626	7.00713e-06	0.00377166
Papio_anubis_GFOD1	4.47008	1.22851	7.81915e-06	0.00412621
Papio_anubis_ROR2	4.43515	2.56206	9.20061e-06	0.00476185
Papio_anubis_RNF19A	4.40835	0.858788	1.04163e-05	0.00528932
Papio_anubis_COL11A1	4.40562	5.06939	1.05484e-05	0.00530635
Papio_anubis_ENSPANG00000038282	4.26581	2.13052	1.99181e-05	0.00924234
Papio_anubis_AOAH	4.12174	0.969594	3.76018e-05	0.0168663
Papio_anubis_ENSPANG00000034967	4.08995	1.07993	4.31461e-05	0.0189417
Papio_anubis_APBA2	4.08921	1.39551	4.32845e-05	0.0189417
Papio_anubis_HEG1	4.01139	1.39169	6.03614e-05	0.0253829
Papio_anubis_MTSS1	-3.87388	-0.957923	0.000107118	0.0433515
Papio_anubis_FKBP5	-3.89321	-1.07675	9.8925e-05	0.0403389
Papio_anubis_INPP5A	-3.96607	-1.93577	7.30676e-05	0.0302533
Papio_anubis_NCOA7	-4.03915	-0.88339	5.36461e-05	0.0229171
Papio_anubis_GRAMD1B	-4.0522	-0.86492	5.07384e-05	0.0220246
Papio_anubis_ST6GALNAC3	-4.1706	-4.41984	3.03798e-05	0.0137414
Papio_anubis_ARHGAP10	-4.20127	-1.86754	2.65428e-05	0.0121076
Papio_anubis_MAP3K5	-4.20916	-1.08467	2.56325e-05	0.0117923
Papio_anubis_NSD3	-4.2978	-0.777747	1.72504e-05	0.00814492
Papio_anubis_SLAMF1	-4.30394	-2.83616	1.67786e-05	0.00799224
Papio_anubis_PLCL1	-4.3417	-2.59671	1.41388e-05	0.00685615
Papio_anubis_IL1RL2	-4.45395	-3.71773	8.43043e-06	0.00440559
Papio_anubis_LDLRAD4	-4.48648	-1.35858	7.24084e-06	0.00385886
Papio_anubis_KCNK13	-4.50775	-1.41438	6.55188e-06	0.00356224
Papio_anubis_CD2	-4.57107	-1.44785	4.85247e-06	0.00272072
Papio_anubis_CDC14A	-4.65981	-0.968562	3.16505e-06	0.00183185
Papio_anubis_DGKA	-4.77138	-1.57187	1.82967e-06	0.001132
Papio_anubis_RETREG1	-4.84002	-1.54688	1.29826e-06	0.0008522
Papio_anubis_LMBR1	-4.87153	-1.24493	1.10739e-06	0.00073588
Papio_anubis_CYTH1	-4.89892	-0.831222	9.63656e-07	0.000648372
Papio_anubis_PHACTR2	-4.95641	-0.756828	7.18068e-07	0.00048925
Papio_anubis_DGKH	-4.9622	-1.35139	6.97007e-07	0.000480989
Papio_anubis_HIVEP1	-5.01597	-1.03764	5.27654e-07	0.000373704
Papio_anubis_AOPEP	-5.19279	-0.794572	2.07163e-07	0.000157053
Papio_anubis_CASK	-5.23368	-1.19325	1.6617e-07	0.000127775
Papio_anubis_ZNF831	-5.33533	-2.75392	9.53703e-08	7.89754e-05
Papio_anubis_SMAD3	-5.48496	-0.812909	4.13565e-08	3.59041e-05
Papio_anubis_IL7R	-5.4962	-4.71402	3.88052e-08	3.48122e-05
Papio_anubis_ZDHHC14	-5.56727	-1.48287	2.58756e-08	2.53233e-05
Papio_anubis_IL6ST	-5.78014	-2.11165	7.46394e-09	8.03508e-06
Papio_anubis_LEF1	-5.93199	-4.1803	2.99276e-09	3.35601e-06
Papio_anubis_THADA	-6.05156	-0.851822	1.43449e-09	1.71585e-06
Papio_anubis_RUNX2	-6.26812	-2.11911	3.65433e-10	4.79751e-07
Papio_anubis_PDE4B	-6.28768	-2.19213	3.22246e-10	4.33631e-07
Papio_anubis_BCL11B	-6.56031	-1.12204	5.36972e-11	7.81163e-08
Papio_anubis_DPYD	-7.22364	-1.0111	5.06137e-13	8.25555e-10
Papio_anubis_ZEB1	-7.44787	-1.59642	9.48578e-14	1.70194e-10
Papio_anubis_PAG1	-7.45825	-2.62159	8.76764e-14	1.62733e-10
Papio_anubis_INPP4B	-7.52023	-0.957637	5.46817e-14	1.05118e-10
Papio_anubis_ABTB3	-7.68321	-0.900838	1.55153e-14	3.09307e-11
Papio_anubis_CAMK4	-8.64238	-1.14291	5.50521e-18	1.5596e-14
Papio_anubis_PDZRN3	-8.98961	-1.74681	2.48099e-19	7.85541e-16
Papio_anubis_ITGA4	-9.24081	-1.195	2.44628e-20	8.77821e-17
Papio_anubis_AHI1	-10.0825	-1.22901	6.60154e-24	2.96112e-20
Papio_anubis_AFF3	-10.8099	-2.56272	3.09115e-27	1.84871e-23
Papio_anubis_ELMO1	-10.8579	-1.15096	1.82901e-27	1.2306e-23
Papio_anubis_TOX	-11.7722	-1.23078	5.43179e-32	4.87286e-28
Papio_anubis_PDE7B	-11.9198	-2.11475	9.32915e-33	1.0043e-28

## Sheet: CD4T_naive_papio
Gene	scores	log2FC	pvals	FDR
Papio_anubis_BCL11B	13.6171	1.9637	3.16849e-42	1.70547e-37
Papio_anubis_LEF1	11.2575	2.79454	2.12754e-29	5.72584e-25
Papio_anubis_CAMK4	10.9738	1.41357	5.10761e-28	9.16407e-24
Papio_anubis_RIPOR2	9.79119	0.833682	1.22847e-22	1.16119e-18
Papio_anubis_FOXP1	9.7859	1.37237	1.29439e-22	1.16119e-18
Papio_anubis_PAG1	9.51096	1.80763	1.88906e-21	1.27101e-17
Papio_anubis_IL7R	9.46614	2.44636	2.9037e-21	1.73661e-17
Papio_anubis_ADD3	8.52227	1.68989	1.56459e-17	7.01796e-14
Papio_anubis_RETREG1	8.37254	1.977	5.63882e-17	2.33473e-13
Papio_anubis_STK38	8.31772	1.48106	8.96739e-17	3.4477e-13
Papio_anubis_BACH2	7.82127	1.27687	5.22947e-15	1.65577e-11
Papio_anubis_CCND3	7.80409	0.8891	5.99336e-15	1.79221e-11
Papio_anubis_CDC14A	7.63503	1.42705	2.25775e-14	6.07627e-11
Papio_anubis_ELMO1	7.54409	0.791107	4.55455e-14	1.16739e-10
Papio_anubis_GPHN	7.49838	1.75298	6.46113e-14	1.52049e-10
Papio_anubis_PDZRN3	7.49765	1.2336	6.49711e-14	1.52049e-10
Papio_anubis_AFF3	7.43999	1.10444	1.00689e-13	2.25821e-10
Papio_anubis_SMCHD1	7.26867	1.01005	3.63049e-13	6.9791e-10
Papio_anubis_ITGA6	7.0773	2.01107	1.46986e-12	2.63721e-09
Papio_anubis_IMMP2L	7.06649	1.44661	1.58901e-12	2.75904e-09
Papio_anubis_ST6GAL1	6.73589	0.996012	1.62928e-11	2.57934e-08
Papio_anubis_CYTH1	6.64145	1.17695	3.10612e-11	4.77686e-08
Papio_anubis_RASGRF2	6.36721	5.55249	1.92492e-10	2.59027e-07
Papio_anubis_SELL	6.04171	3.4332	1.52487e-09	1.95423e-06
Papio_anubis_TCF7	6.02157	1.92921	1.72736e-09	2.10585e-06
Papio_anubis_INPP4B	6.02143	0.766755	1.7288e-09	2.10585e-06
Papio_anubis_SSBP2	6.01731	1.32841	1.77343e-09	2.10585e-06
Papio_anubis_DGKA	5.41123	1.32867	6.25929e-08	5.71038e-05
Papio_anubis_RASSF3	5.16318	1.21274	2.42788e-07	0.000210779
Papio_anubis_CERS6	5.0709	1.80832	3.95945e-07	0.000333002
Papio_anubis_IGF1R	4.92988	2.11305	8.22791e-07	0.000671024
Papio_anubis_ENSPANG00000007767	4.54613	1.82154	5.46413e-06	0.00381964
Papio_anubis_MAP4K4	4.53284	0.78353	5.81973e-06	0.00401606
Papio_anubis_SNX29	4.46118	0.908371	8.15091e-06	0.00535037
Papio_anubis_PECAM1	4.35965	3.10226	1.30272e-05	0.00844823
Papio_anubis_MAN2A1	4.33476	1.08765	1.45922e-05	0.00935046
Papio_anubis_DTNBP1	4.3093	1.10075	1.63773e-05	0.0102503
Papio_anubis_SLC30A7	4.24868	1.51299	2.15039e-05	0.013153
Papio_anubis_ANKH	4.21979	1.33486	2.44528e-05	0.0144637
Papio_anubis_NR3C2	4.19069	2.14181	2.78103e-05	0.0162708
Papio_anubis_INPP5A	4.17392	1.33829	2.99403e-05	0.0173287
Papio_anubis_ENSPANG00000004762	4.14504	1.57803	3.39758e-05	0.0194551
Papio_anubis_MAP3K5	4.10429	0.938058	4.0556e-05	0.0222752
Papio_anubis_DNM3	3.99825	2.11362	6.38121e-05	0.033674
Papio_anubis_CNTNAP2	3.98717	3.35146	6.68668e-05	0.0346074
Papio_anubis_PCNX2	3.92193	1.55626	8.78416e-05	0.0446053
Papio_anubis_AFAP1L2	-3.97204	-6.23265	7.12601e-05	0.03653
Papio_anubis_AOAH	-4.0171	-3.20105	5.89182e-05	0.0313993
Papio_anubis_FCRL5	-4.08776	-3.19285	4.35563e-05	0.0236814
Papio_anubis_SAMD3	-4.11998	-2.61313	3.78898e-05	0.0210253
Papio_anubis_CD244	-4.12122	-4.31438	3.76863e-05	0.0210253
Papio_anubis_FOCAD	-4.12896	-1.81021	3.644e-05	0.0206465
Papio_anubis_ENSPANG00000023803	-4.27796	-26.9657	1.88612e-05	0.0116692
Papio_anubis_ZDHHC14	-4.33039	-1.84438	1.48847e-05	0.00942571
Papio_anubis_ARHGAP26	-4.47925	-1.73642	7.49058e-06	0.00497763
Papio_anubis_DNAJC1	-4.47982	-1.157	7.47074e-06	0.00497763
Papio_anubis_PTK2B	-4.51757	-1.83478	6.2553e-06	0.004262
Papio_anubis_TXK	-4.56123	-0.769922	5.08543e-06	0.00360169
Papio_anubis_GZMB	-4.58475	-26.9686	4.54534e-06	0.0032621
Papio_anubis_CMIP	-4.61096	-0.896356	4.00812e-06	0.00291542
Papio_anubis_SNTB1	-4.66743	-1.55656	3.04989e-06	0.00224881
Papio_anubis_IKZF2	-4.68677	-1.95786	2.77554e-06	0.00207495
Papio_anubis_CD44	-4.75529	-0.968655	1.98159e-06	0.00150227
Papio_anubis_KCNK13	-4.79707	-3.5123	1.61007e-06	0.00123805
Papio_anubis_NIBAN1	-4.80483	-1.35243	1.54881e-06	0.00120821
Papio_anubis_RIN3	-4.84183	-1.71155	1.28647e-06	0.00101832
Papio_anubis_LCP2	-4.88204	-0.861211	1.04993e-06	0.000843487
Papio_anubis_INPP5D	-5.13152	-0.824077	2.8741e-07	0.000245558
Papio_anubis_ENTREP2	-5.19748	-4.51007	2.02004e-07	0.000178247
Papio_anubis_IL12RB2	-5.31606	-2.69886	1.06037e-07	9.51259e-05
Papio_anubis_PHACTR2	-5.45176	-1.27979	4.98726e-08	4.62835e-05
Papio_anubis_RBPJ	-5.52924	-1.22903	3.21616e-08	3.03707e-05
Papio_anubis_PTPN22	-5.70103	-1.19954	1.19087e-08	1.16545e-05
Papio_anubis_SETBP1	-5.72417	-2.94546	1.03943e-08	1.03608e-05
Papio_anubis_SYTL3	-5.75235	-1.4314	8.80127e-09	8.93843e-06
Papio_anubis_GAS7	-5.75316	-2.41438	8.75923e-09	8.93843e-06
Papio_anubis_KLRK1	-5.79989	-2.20477	6.63577e-09	7.00347e-06
Papio_anubis_EIF4G3	-5.83047	-1.10539	5.52704e-09	5.94997e-06
Papio_anubis_UBASH3B	-5.87683	-1.23073	4.18195e-09	4.59383e-06
Papio_anubis_PDGFD	-6.01191	-3.94437	1.83347e-09	2.10585e-06
Papio_anubis_HIP1	-6.48369	-2.06637	8.95071e-11	1.23534e-07
Papio_anubis_KLRC1	-6.56559	-6.34955	5.18274e-11	7.34121e-08
Papio_anubis_ZEB2	-6.85242	-2.33486	7.26113e-12	1.18436e-08
Papio_anubis_AHI1	-7.02499	-1.24709	2.14087e-12	3.60107e-09
Papio_anubis_PDE7B	-7.19828	-1.61751	6.09759e-13	1.13176e-09
Papio_anubis_MYO1D	-7.28361	-2.3681	3.25008e-13	6.47921e-10
Papio_anubis_CHST11	-7.3499	-0.89841	1.98362e-13	4.10656e-10
Papio_anubis_PARP8	-7.38361	-1.28404	1.5406e-13	3.31698e-10
Papio_anubis_KLRD1	-7.74303	-7.46271	9.70734e-15	2.75004e-11
Papio_anubis_TOX	-7.96244	-1.14451	1.68676e-15	5.67447e-12
Papio_anubis_VAV3	-8.07781	-1.93544	6.59397e-16	2.36618e-12
Papio_anubis_ARAP2	-8.57731	-1.45213	9.71182e-18	4.75226e-14
Papio_anubis_PRKCA	-9.05383	-1.29224	1.38038e-19	7.43005e-16
Papio_anubis_CBLB	-9.65373	-1.10841	4.73993e-22	3.64474e-18
Papio_anubis_TSPAN5	-10.3782	-2.16797	3.11437e-25	4.19085e-21
