# Supplementary material for: Integrated Molecular Profiling of Preclinical and Clinical Cardiac Xenotransplants
Source: Research Square preprint supplement (doi:10.21203/rs.3.rs-8406985/v1), 2026-02-04
Supplement: Supplementary file 41 [file d2b848447b8d5e9862363a38.xlsx]

## Sheet: Clinical Metadata
	Outcomes		Donor Demographics						Recipient Demographics					Cardiac Imaging @ Study Endpoint (within last week, NOT day of euthanasia)	Blood Parameters @ Endpoint
DPZ_ID	Survival_Days	Condition	Donor_Pig_Strain	Donor_Sex (m/f)	Donor Age (days)	Donor_Weight (kg)	Donor_heart_mass (g)	Donor_Genetic_Modifications	Recipient_Sex (m/f)	Blood_group	Recipient_strain	Recipient Age (Years)	Recipient_Weight (kg)	Recipient_heart_mass (g)	Recipient_LVEF (%)_Teichholz_2d	Recipient_LV_Wall_Thickness_PWd (mm)	Bilirubin (mg/dl)	AST (U/L)	ALT (U/L)	CHE (U/L)	TropT (ng/ml)	CK (U/L)	LDH (U/L)	Platelets (#/µl)	WBC (#/µl)	Quick (%)	Creatinine (mg/dl)	Urea (mg/dl)	Rejection (Yes/No)	Rejection_Grade	VT_VF_Arrhythmia	AFib_Aflut (yes/no)	Immunosuppression_Protocol	Notes
17186	90	3-month Protocol	German Landrace/Large White	f	76	19.3	102	GGTA1-KO/hCD46/hTBM	m	B	P. anubis	4	21.5	83.4	51	8.6	0.2	23	38	14.4	0.018	66	511	128	4.09	117	1.1	16	No	n/a	No	No	anti-CD40 mAb (clone 210CR4)	no myocardial hypertrophy
17187	51	3-month Protocol	German Landrace/Large White	f	78	18.7	101	GGTA1-KO/hCD46/hTBM	m	AB	P. anubis	4	22	93.2	27	9.5	0.3	27	57	2.1	0.218	3053	436	216	5.22	101	0.9	50	No	n/a	No	No	anti-CD40L PAS Fab	VCS thrombosis, recalcitrant effusions, chylothorax
17290	90	3-month Protocol	German Landrace/Large White	f	59	12.7	61	GGTA1-KO/hCD46/hTBM	m	B	P. anubis	4	13.7	47.5	65	7.3	0.2	27	50	9.4	0.018	143	311	202	3.64	96	1.2	18	No	n/a	No	No	anti-CD40 mAb (clone 210CR4)	no myocardial hypertrophy
17188	11	PCMV/PRV	German Landrace/Large White	f	54	14.5	78.7	GGTA1-KO/hCD46/hTBM	m	AB	P. anubis	5	19	78.5	65	9.9	1.3	937	420	3.9	0.291	1204	5720	80	4.24	36	0.9	77	No	n/a	No	No	anti-CD40L PAS Fab	iatrogenic bleeding (TRALI, acute kidney failure)
17482	90	3-month Protocol	German Landrace/Large White	m	63	20.3	94.2	GGTA1-KO/hCD46/hTBM	m	B	P. anubis	6	20	81.9	52	10	0.1	26	27	9.2	0.14	155	309	390	1.9	113	0.8	18	No	n/a	No	No	anti-CD40 mAb (clone 210CR4)	no myocardial hypertrophy (pulmonary embolism?)
17491	182	6-month Protocol	German Landrace/Large White	m	85	23	160	GGTA1-KO/hCD46/hTBM	m	B	P. anubis	8	25	117	55	13.4	0.2	28	38	7.2	0.14	96	497	303	7.33	99	1	14	No	n/a	No	No	anti-CD40 mAb (clone 210CR4)	myocardial hypertrophy (DSI infection)
17493	195	6-month Protocol	German Landrace/Large White	m	71	21	100	GGTA1-KO/hCD46/hTBM	m	B	P. anubis	6	23	100	40	19.2	0.2	63	58	7.3	0.556	461	962	271	4.01	26	0.9	18	No	n/a	No	No	anti-CD40 mAb (clone 210CR4)	myocardial hypertrophy
17494	15	PCMV/PRV	German Landrace/Large White	m	61	11.6	52	GGTA1-KO/hCD46/hTBM	m	B	P. anubis	4	16	84	53	7.6	0.4	6006	2649	4.5	0.619	1444	13461	132	1.73	46	3.1	120	No	n/a	No	No	anti-CD40 mAb (clone 210CR4)	multiorgan failure (size missmatch)
17492	27	PCMV/PRV	German Landrace/Large White	f	75	24	108	GGTA1-KO/hCD46/hTBM	m	B	P. anubis	5	26	113	57	10.7	0.9	2302	851	3.8	0.864	40000	24000	49	2.44	83	2.6	148	No	n/a	No	No	anti-CD40 mAb (clone 210CR4)	multiorgan failure (pericardial/pleural effusions)
16701	90	3-month Protocol	German Landrace/Large White	m	70	18	74.6	GGTA1-KO/hCD46/hTBM	m	A	P. hamadryas	5	20	90.8	58	10.7	0.1	37	27	13.2	0.115	73	696	170	6.21	108	1.1	32	No	n/a	No	No	anti-CD40 mAb (clone 210CR4)	no myocardial hypertrophy (intraoperative aortic dissection)
16861	18	Rejection	German Landrace/Large White	m	62	13	73.3	GGTA1-KO/hCD46/hTBM	m	AB	P. hamadryas	4	14.7	57.12	53	12.7	0.1	416	87	8.2	0.522	1636	1989	165	4.45	85	0.5	40	Yes	pAMR 2 (ISHLT)§	No	No	anti-CD40L PAS Fab	acute humoral rejection
17769	51	Rejection	German Landrace/Large White	n/a	63	21	113	GGTA1-KO/hCD46/hTBM	m	B	P. anubis	11	28	136	51	11	0.3	75	85	3.7	0.475	448	525	60	5.58	78	1.4	86	Yes	Grade 1R (ISHLT)	No	No	anti-CD40L PAS Fab	cellular rejection, acute kidney failure
17781	29	Rejection	German Landrace/Large White	f	77	25	114	GGTA1-KO/hCD46/hTBM	m	B	P. anubis	11	29	115	30	15.1	0.4	83	90	2.8	0.276	303	535	106	12.2	55	1.3	51	Yes	Grade 3R (ISHLT)	No	No	anti-CD40L PAS Fab	acute cellular rejection
16956	90	3-month Protocol	German Landrace/Large White	m	54	15	71.6	GGTA1-KO/hCD46/hTBM	m	A	P. hamadryas	5	18	80.8	62	7.4	0.1	27	19	11.2	0.013	47	361	498	4.08	88	0.8	25	No	n/a	No	No	anti-CD40L PAS Fab + anti-CD40 mAb (clone 210CR4)	no myocardial hypertrophy
16935	90	3-month Protocol	German Landrace/Large White	f	56	14	70.7	GGTA1-KO/hCD46/hTBM	m	A	P. hamadryas	5	15.2	65.6	68	6.6	0.1	64	27	13.4	0.013	79	757	498	4.68	128	0.7	24	No	n/a	No	No	anti-CD40L PAS Fab + anti-CD40 mAb (clone 210CR4)	no myocardial hypertrophy
16950	1	Prematurely Terminated	German Landrace/Large White	f	68	22	99.3	GGTA1-KO/hCD46/hTBM	m	AB	P. hamadryas	5	25.7	93.8	n/a	n/a	5.8	1360	1789	1.2	10.3	18689	13630	367	11.1	13	3	38	n/a	n/a	No	No	anti-CD40L PAS Fab + anti-CD40 mAb (clone 210CR4)	acute RV failure (PA size missmatch)
17353	0	Prematurely Terminated	German Landrace/Large White	f	50	10.1	57.9	GGTA1-KO/hCD46/hTBM	m	AB	P. hamadryas	3	11	47.4	n/a	n/a	5.8	332	37	1.9	4.85	5826	1028	42	8.87	41	0.9	24	n/a	n/a	Yes	No	anti-CD40L PAS Fab + anti-CD40 mAb (clone 210CR4)	technical failure (insuff. heart perfusion)
17012	120	6-month Protocol	German Landrace/Large White	m	57	13.2	64	GGTA1-KO/hCD46/hTBM	m	A	P. hamadryas	5	15	65	50	12.6	0.1	56	41	1.6	0.043	116	729	118	5.38	141	0.7	35	No	n/a	No	No	anti-CD40L PAS Fab + anti-CD40 mAb (clone 210CR4)	recalcitrant effusions
17020	170	Rejection	German Landrace/Large White	m	55	11.5	53.5	GGTA1-KO/hCD46/hTBM	m	A	P. hamadryas	5	15	63	36	14.9	0.1	456	347	8.6	0.373	501	2429	386	6.14	60	0.6	35	Yes	pAMR 3 (ISHLT)	No	No	anti-CD40L PAS Fab + anti-CD40 mAb (clone 210CR4)	acute humoral rejection
