# Supplementary material for: Integrated Molecular Profiling of Preclinical and Clinical Cardiac Xenotransplants
Source: Research Square preprint supplement (doi:10.21203/rs.3.rs-8406985/v1), 2026-02-04
Supplement: Supplementary file 42 [file e375525219d275ba429fa7b3.xlsx]

## Sheet: CM
Gene	scores	log2FC	pvals	FDR
Sus_scrofa___MLIP	325.322	7.67775	0	0
Sus_scrofa___TTN	324.19	5.39034	0	0
Sus_scrofa___RYR2	323.971	6.71714	0	0
Sus_scrofa___DMD	323.366	5.75377	0	0
Sus_scrofa___ABLIM1	322.623	5.63006	0	0
Sus_scrofa___FHOD3	322.489	7.17337	0	0
Sus_scrofa___SORBS2	322.157	6.08464	0	0
Sus_scrofa___NEBL	322.05	6.60207	0	0
Sus_scrofa___PDLIM5	321.203	5.31666	0	0
Sus_scrofa___CTNNA3	320.788	6.8705	0	0
Sus_scrofa___SLC8A1	320.01	5.32982	0	0
Sus_scrofa___PCDH7	319.715	6.40927	0	0
Sus_scrofa___CDH2	319.431	7.23333	0	0
Sus_scrofa___ACTN2	318.876	7.33082	0	0
Sus_scrofa___ENSSSCG00000010212	317.88	6.46785	0	0
Sus_scrofa___MYOZ2	317.486	7.66813	0	0
Sus_scrofa___SORBS1	316.221	5.16262	0	0
Sus_scrofa___PDE4DIP	315.176	7.34433	0	0
Sus_scrofa___PDE4D	314.703	4.88628	0	0
Sus_scrofa___ENSSSCG00000010626	312.939	7.57479	0	0
Sus_scrofa___RCAN2	311.329	5.86344	0	0
Sus_scrofa___NEXN	309.538	6.61954	0	0
Sus_scrofa___PDE3A	307.414	4.40553	0	0
Sus_scrofa___ATP2A2	307.067	5.71816	0	0
Sus_scrofa___CAMK2D	306.789	4.12417	0	0
Sus_scrofa___ACSS3	304.474	5.99357	0	0
Sus_scrofa___PPP1R12B	303.824	5.79678	0	0
Sus_scrofa___PPM1E	303.224	7.65215	0	0
Sus_scrofa___MYBPC3	296.266	6.87448	0	0
Sus_scrofa___INPP4B	295.928	4.44272	0	0
Sus_scrofa___MYO18B	294.704	8.34334	0	0
Sus_scrofa___CACNB2	294.458	4.70318	0	0
Sus_scrofa___ENSSSCG00000040109	294.148	8.45331	0	0
Sus_scrofa___NRAP	293.454	7.11862	0	0
Sus_scrofa___ANKRD1	293	5.91229	0	0
Sus_scrofa___LARGE1	292.251	4.29899	0	0
Sus_scrofa___MYH7	291.232	5.21609	0	0
Sus_scrofa___FHL2	290.982	6.73791	0	0
Sus_scrofa___AKAP6	290.906	5.76325	0	0
Sus_scrofa___PTGER3	290.624	8.40303	0	0
Sus_scrofa___MYOM1	289.694	7.95645	0	0
Sus_scrofa___ASPDH	288.072	7.13009	0	0
Sus_scrofa___SOX6	286.881	5.23218	0	0
Sus_scrofa___PALLD	284.134	5.55206	0	0
Sus_scrofa___CCDC141	283.805	5.81268	0	0
Sus_scrofa___MYOCD	283.754	7.38993	0	0
Sus_scrofa___TECRL	283.637	8.32892	0	0
Sus_scrofa___MSRB3	282.722	4.19684	0	0
Sus_scrofa___CDH13	282.528	4.1047	0	0
Sus_scrofa___TNNT2	282.131	6.06653	0	0
Sus_scrofa___IGF1R	280.896	3.45946	0	0
Sus_scrofa___TRDN	279.93	8.53733	0	0
Sus_scrofa___TMEM164	279.496	6.6841	0	0
Sus_scrofa___OBSCN	277.564	7.98408	0	0
Sus_scrofa___FILIP1	276.507	4.12438	0	0
Sus_scrofa___GRK5	275.912	3.46312	0	0
Sus_scrofa___SLMAP	274.156	4.15166	0	0
Sus_scrofa___MAP3K5	272.182	4.22422	0	0
Sus_scrofa___ENSSSCG00000027725	271.908	3.88469	0	0
Sus_scrofa___TACC2	270.871	5.7864	0	0
Sus_scrofa___KIF26B	269.667	6.00675	0	0
Sus_scrofa___ENSSSCG00000038455	268.927	8.46211	0	0
Sus_scrofa___TPM2	268.428	7.45462	0	0
Sus_scrofa___PPARGC1A	267.535	7.50771	0	0
Sus_scrofa___DTNA	266.834	7.34161	0	0
Sus_scrofa___EFNA5	266.142	4.24632	0	0
Sus_scrofa___LMO7	265.838	6.01567	0	0
Sus_scrofa___EPB41L3	263.832	5.25129	0	0
Sus_scrofa___INSR	263.255	5.52655	0	0
Sus_scrofa___DENND5B	261.366	4.6852	0	0
Sus_scrofa___CASQ2	261.118	8.32299	0	0
Sus_scrofa___MITF	260.377	3.78636	0	0
Sus_scrofa___PPIP5K2	260.044	5.8855	0	0
Sus_scrofa___PDE7A	259.025	7.3895	0	0
Sus_scrofa___ENSSSCG00000036052	257.442	6.90552	0	0
Sus_scrofa___LRRC2	256.859	7.67814	0	0
Sus_scrofa___PYGB	256.294	8.03023	0	0
Sus_scrofa___PCGF5	255.661	4.68269	0	0
Sus_scrofa___LRRFIP2	255.387	4.49238	0	0
Sus_scrofa___RBFOX1	255.259	7.46456	0	0
Sus_scrofa___DYNC1I1	253.801	5.82817	0	0
Sus_scrofa___TSPAN12	253.2	6.78834	0	0
Sus_scrofa___ROR1	252.933	3.43581	0	0
Sus_scrofa___TBC1D8	252.192	6.34407	0	0
Sus_scrofa___KCNJ3	251.968	8.29787	0	0
Sus_scrofa___LRRTM3	251.89	7.9779	0	0
Sus_scrofa___GRAMD2B	251.859	6.32141	0	0
Sus_scrofa___FBXW7	251.753	3.66598	0	0
Sus_scrofa___RBPMS	251.555	2.82672	0	0
Sus_scrofa___SAMD4A	251.275	3.07924	0	0
Sus_scrofa___RETREG1	250.919	5.15744	0	0
Sus_scrofa___SLC16A7	250.683	4.99239	0	0
Sus_scrofa___MSI2	248.945	3.16859	0	0
Sus_scrofa___USP24	248.874	3.7049	0	0
Sus_scrofa___TRIM55	247.737	8.30357	0	0
Sus_scrofa___SGCD	246.115	5.88096	0	0
Sus_scrofa___PHLDB2	243.674	3.44659	0	0
Sus_scrofa___TANC1	243.647	3.04293	0	0
Sus_scrofa___CPNE3	243.551	5.70893	0	0
Sus_scrofa___JPH1	243.417	7.53124	0	0

## Sheet: EC_papio
Gene	scores	log2FC	pvals	FDR
Papio_anubis_MACF1	12.4842	6.00017	9.10686e-36	2.57992e-32
Papio_anubis_SPTBN1	11.3303	8.58013	9.28821e-30	6.40958e-27
Papio_anubis_DOCK4	11.1366	5.34201	8.31953e-29	5.03154e-26
Papio_anubis_LDB2	10.9894	6.86152	4.30007e-28	2.33794e-25
Papio_anubis_ASAP1	10.634	5.69715	2.07099e-26	8.25728e-24
Papio_anubis_PLCB1	10.6183	9.69978	2.44876e-26	9.69168e-24
Papio_anubis_MAP4K4	10.5411	6.07479	5.5856e-26	2.13227e-23
Papio_anubis_PTPRM	10.4251	9.22941	1.90361e-25	7.06648e-23
Papio_anubis_DIAPH2	10.3723	5.00337	3.31532e-25	1.20575e-22
Papio_anubis_BMPR2	10.2431	6.4883	1.27128e-24	4.17243e-22
Papio_anubis_ARHGAP29	10.2246	8.59316	1.53917e-24	4.99081e-22
Papio_anubis_UTRN	10.2019	5.44394	1.94375e-24	6.26492e-22
Papio_anubis_QKI	10.1786	4.58759	2.47035e-24	7.91484e-22
Papio_anubis_TCF4	10.1733	6.17484	2.60987e-24	8.31236e-22
Papio_anubis_PLEKHG1	10.1543	7.34344	3.16928e-24	9.976e-22
Papio_anubis_JMJD1C	10.1135	4.72815	4.81456e-24	1.45589e-21
Papio_anubis_FLI1	10.1107	5.18584	4.95261e-24	1.481e-21
Papio_anubis_MAML2	10.1074	4.80808	5.12182e-24	1.52313e-21
Papio_anubis_EGFL7	10.0797	12.2473	6.79173e-24	1.9868e-21
Papio_anubis_MEF2C	10.0617	5.11086	8.15709e-24	2.33544e-21
Papio_anubis_CUX1	10.0567	5.00888	8.58155e-24	2.44397e-21
Papio_anubis_ETV6	10.0367	4.30935	1.05174e-23	2.9332e-21
Papio_anubis_MAGI1	9.88965	11.3942	4.61658e-23	1.19467e-20
Papio_anubis_FBXL7	9.88618	10.9008	4.77906e-23	1.2308e-20
Papio_anubis_VPS13B	9.73687	4.26922	2.09911e-22	4.9774e-20
Papio_anubis_PPP3CA	9.73255	5.0004	2.1902e-22	5.1706e-20
Papio_anubis_HSPG2	9.70207	11.1739	2.95431e-22	6.85425e-20
Papio_anubis_COL4A2	9.70149	11.1292	2.9714e-22	6.86432e-20
Papio_anubis_KMT2C	9.69736	4.50831	3.09393e-22	7.11683e-20
Papio_anubis_AOPEP	9.67975	5.40183	3.67599e-22	8.31361e-20
Papio_anubis_RASAL2	9.50124	6.26415	2.07414e-21	4.37814e-19
Papio_anubis_PTK2	9.48523	6.1987	2.41844e-21	5.04554e-19
Papio_anubis_EXT1	9.47852	6.38701	2.57918e-21	5.36011e-19
Papio_anubis_GNB1	9.46159	4.74353	3.03293e-21	6.27886e-19
Papio_anubis_ZFAND3	9.45513	4.79476	3.22628e-21	6.62816e-19
Papio_anubis_VWF	9.42122	7.3703	4.45895e-21	8.98905e-19
Papio_anubis_PDE4D	9.34377	6.60683	9.29605e-21	1.81293e-18
Papio_anubis_UBE2E2	9.33742	4.91465	9.87117e-21	1.91814e-18
Papio_anubis_EMCN	9.33388	12.6195	1.02065e-20	1.97617e-18
Papio_anubis_ELMO1	9.28621	4.1107	1.59884e-20	3.03025e-18
Papio_anubis_DDX5	9.27277	5.2234	1.81376e-20	3.40166e-18
Papio_anubis_APBB2	9.26325	7.73153	1.98304e-20	3.70623e-18
Papio_anubis_FRMD4A	9.2184	4.97605	3.01556e-20	5.46517e-18
Papio_anubis_COL4A1	9.14466	11.6826	5.98182e-20	1.05566e-17
Papio_anubis_KIAA1217	9.14106	10.832	6.18451e-20	1.08787e-17
Papio_anubis_PICALM	9.09249	4.67141	9.67918e-20	1.66451e-17
Papio_anubis_AFF1	9.07401	4.56335	1.14718e-19	1.95406e-17
Papio_anubis_ZEB1	9.04256	7.12979	1.53038e-19	2.58227e-17
Papio_anubis_TCF7L2	9.0316	5.48638	1.69181e-19	2.82805e-17
Papio_anubis_FNDC3B	9.02104	5.5094	1.86312e-19	3.07621e-17
Papio_anubis_DOCK1	9.01566	6.87169	1.95694e-19	3.22124e-17
Papio_anubis_LPP	9.01257	4.48011	2.0128e-19	3.30307e-17
Papio_anubis_TTC28	8.99646	6.58356	2.33121e-19	3.79092e-17
Papio_anubis_MEF2A	8.9502	4.79925	3.54838e-19	5.63408e-17
Papio_anubis_RNF213	8.93933	5.33055	3.91527e-19	6.14411e-17
Papio_anubis_MED13L	8.92417	4.3078	4.49043e-19	7.00585e-17
Papio_anubis_ENSPANG00000018738	8.89379	4.27022	5.90602e-19	9.16131e-17
Papio_anubis_RABGAP1L	8.84615	4.10509	9.0592e-19	1.36972e-16
Papio_anubis_ASH1L	8.78187	4.34818	1.60782e-18	2.37103e-16
Papio_anubis_PKP4	8.72817	8.12101	2.58829e-18	3.73505e-16
Papio_anubis_PTPRB	8.72106	8.08551	2.75597e-18	3.95581e-16
Papio_anubis_MYOF	8.71866	5.0238	2.81527e-18	4.03018e-16
Papio_anubis_STAG1	8.70749	4.51343	3.10671e-18	4.42385e-16
Papio_anubis_GNAQ	8.70518	4.44654	3.17071e-18	4.50307e-16
Papio_anubis_RAPGEF5	8.58413	11.4338	9.15255e-18	1.26319e-15
Papio_anubis_RBPMS	8.56753	9.64118	1.05725e-17	1.44802e-15
Papio_anubis_RALGAPA2	8.5517	5.9765	1.21294e-17	1.64868e-15
Papio_anubis_SYNE2	8.50648	7.4609	1.79301e-17	2.36545e-15
Papio_anubis_VTI1A	8.48805	4.35015	2.10132e-17	2.72544e-15
Papio_anubis_FRMD4B	8.45281	4.25543	2.84376e-17	3.63582e-15
Papio_anubis_CDK17	8.4166	6.20383	3.87558e-17	4.82886e-15
Papio_anubis_RPS6KC1	8.39164	4.52751	4.79407e-17	5.91848e-15
Papio_anubis_KMT2E	8.28972	4.73157	1.13512e-16	1.36078e-14
Papio_anubis_ANKRD17	8.27896	4.75209	1.24253e-16	1.48293e-14
Papio_anubis_DGKH	8.23511	6.24165	1.79396e-16	2.11294e-14
Papio_anubis_TEK	8.2043	10.1078	2.31929e-16	2.70212e-14
Papio_anubis_ERG	8.20394	9.98018	2.32636e-16	2.7045e-14
Papio_anubis_CALD1	8.20261	9.86621	2.35215e-16	2.7286e-14
Papio_anubis_CDC42BPA	8.16458	7.99681	3.22555e-16	3.7098e-14
Papio_anubis_ARHGAP31	8.15142	5.65222	3.5968e-16	4.12796e-14
Papio_anubis_KALRN	8.113	7.09774	4.93835e-16	5.58428e-14
Papio_anubis_MBNL1	8.1121	3.66607	4.97513e-16	5.61408e-14
Papio_anubis_CMIP	8.10971	3.92943	5.07419e-16	5.71388e-14
Papio_anubis_PTPN12	8.10673	5.34963	5.20001e-16	5.84334e-14
Papio_anubis_ZNF609	8.10249	4.17578	5.38477e-16	6.03834e-14
Papio_anubis_ANKRD11	8.09749	4.16228	5.61029e-16	6.25217e-14
Papio_anubis_CLIC4	8.09212	6.73381	5.86338e-16	6.50727e-14
Papio_anubis_TANC1	8.08019	6.52577	6.46648e-16	7.11789e-14
Papio_anubis_ARID1B	8.02599	4.11853	1.00714e-15	1.09205e-13
Papio_anubis_PALM2AKAP2	7.99783	5.74677	1.26629e-15	1.35506e-13
Papio_anubis_RBMS3	7.99392	8.46609	1.30712e-15	1.39597e-13
Papio_anubis_NFIB	7.99281	8.67252	1.31893e-15	1.40302e-13
Papio_anubis_GSK3B	7.98783	4.8574	1.37336e-15	1.45804e-13
Papio_anubis_RERE	7.98138	4.38633	1.44701e-15	1.52719e-13
Papio_anubis_ARL15	7.96429	4.90805	1.66176e-15	1.74358e-13
Papio_anubis_ERBIN	7.94681	4.67019	1.91379e-15	1.98481e-13
Papio_anubis_WWOX	7.94314	4.84141	1.9713e-15	2.04053e-13
Papio_anubis_RBMS1	7.90556	5.33427	2.66727e-15	2.70374e-13
Papio_anubis_IFI16	7.90474	4.18948	2.685e-15	2.7166e-13
Papio_anubis_EXOC6B	7.87348	4.55832	3.44924e-15	3.45091e-13

## Sheet: Endo_lymph_EC
Gene	scores	log2FC	pvals	FDR
Sus_scrofa___MAGI1	64.1604	4.05671	0	0
Sus_scrofa___DOCK9	60.3794	4.43215	0	0
Sus_scrofa___LDB2	57.4849	5.26292	0	0
Sus_scrofa___VAV3	53.7084	4.9188	0	0
Sus_scrofa___PLEKHG1	53.5531	4.3641	0	0
Sus_scrofa___SEMA6A	51.2409	5.51709	0	0
Sus_scrofa___MMRN1	50.2569	10.0385	0	0
Sus_scrofa___NTN1	49.3541	5.578	0	0
Sus_scrofa___RBMS3	48.9868	3.40818	0	0
Sus_scrofa___RAI14	48.876	4.12905	0	0
Sus_scrofa___MAML2	48.3615	3.01855	0	0
Sus_scrofa___RELN	47.8103	8.34069	0	0
Sus_scrofa___GALNT1	47.78	3.86071	0	0
Sus_scrofa___TCF4	47.2356	2.72035	0	0
Sus_scrofa___ASAP1	47.2191	2.58312	0	0
Sus_scrofa___RHOJ	47.1131	4.71814	0	0
Sus_scrofa___UTRN	47.0489	2.03668	0	0
Sus_scrofa___ZDHHC14	46.8859	4.98784	0	0
Sus_scrofa___PECAM1	46.1383	3.56885	0	0
Sus_scrofa___NRP2	46.038	5.24228	0	0
Sus_scrofa___PPP3CA	45.9403	2.89878	0	0
Sus_scrofa___KIAA1217	45.6632	3.11193	0	0
Sus_scrofa___STOX2	45.2085	4.91811	0	0
Sus_scrofa___EPB41L2	45.0265	3.49336	0	0
Sus_scrofa___ENSSSCG00000005095	44.983	4.35289	0	0
Sus_scrofa___NXN	43.8993	3.63236	0	0
Sus_scrofa___ITGA9	43.7134	3.40382	0	0
Sus_scrofa___DAPK1	43.6302	2.51584	0	0
Sus_scrofa___SEMA3D	43.2918	7.10406	0	0
Sus_scrofa___PARD6G	42.9424	7.39883	0	0
Sus_scrofa___CMIP	42.8315	3.3812	0	0
Sus_scrofa___AKT3	42.7511	3.26753	0	0
Sus_scrofa___PLXDC2	42.5667	3.10744	0	0
Sus_scrofa___PTPRE	42.1859	4.5602	0	0
Sus_scrofa___SMAD1	42.1616	3.57561	0	0
Sus_scrofa___ENSSSCG00000015645	42.1417	2.98035	0	0
Sus_scrofa___FRMD4B	42.0762	2.48495	0	0
Sus_scrofa___PEAK1	41.9954	2.19337	0	0
Sus_scrofa___RASGRP3	41.6843	5.14684	0	0
Sus_scrofa___CDKL1	41.6823	4.24742	0	0
Sus_scrofa___FLI1	41.5849	3.54753	0	0
Sus_scrofa___RASAL2	41.4271	2.46746	0	0
Sus_scrofa___FMNL2	40.7753	3.79432	0	0
Sus_scrofa___MYO1D	40.7438	3.55841	0	0
Sus_scrofa___RALGAPA2	40.4858	3.3535	0	0
Sus_scrofa___ERG	40.3246	4.18939	0	0
Sus_scrofa___GPM6A	40.3063	6.71031	0	0
Sus_scrofa___PPFIBP1	40.1735	1.60887	0	0
Sus_scrofa___SNTB2	39.9168	2.98474	0	0
Sus_scrofa___FLRT2	39.8439	4.59326	0	0
Sus_scrofa___CALCRL	39.7917	4.04142	0	0
Sus_scrofa___TBX1	39.7858	8.80639	0	0
Sus_scrofa___TLL1	39.6284	7.90893	0	0
Sus_scrofa___TSPAN18	39.394	3.72569	0	0
Sus_scrofa___FOXP1	39.3002	1.55638	0	0
Sus_scrofa___ARHGAP29	39.2622	3.20192	0	0
Sus_scrofa___TSPAN5	39.243	5.27839	0	0
Sus_scrofa___ENSSSCG00000001229	39.1705	3.38066	0	0
Sus_scrofa___PELI2	39.0757	2.88342	0	0
Sus_scrofa___ENSSSCG00000009633	38.9459	3.68345	0	0
Sus_scrofa___EBF1	38.5837	2.54564	0	0
Sus_scrofa___ETS1	38.4762	3.5906	0	0
Sus_scrofa___FAM171A1	38.3026	3.54073	0	0
Sus_scrofa___OSBPL6	37.9534	4.6715	0	0
Sus_scrofa___TMTC1	37.7931	4.78288	0	0
Sus_scrofa___STON2	37.7871	4.39047	0	0
Sus_scrofa___EMCN	37.6353	4.46159	5.6879353345378e-310	1.93771e-307
Sus_scrofa___CHSY3	37.478	3.79293	2.10214e-307	6.98456e-305
Sus_scrofa___ELK3	37.0002	4.28041	1.13691e-299	3.62103e-297
Sus_scrofa___WASF3	36.9152	3.85372	2.63514e-298	8.34346e-296
Sus_scrofa___DOCK4	36.7311	2.39031	2.32515e-295	7.27635e-293
Sus_scrofa___PHACTR2	36.7001	2.48731	7.27827e-295	2.26451e-292
Sus_scrofa___PDE7B	36.6382	2.74138	7.04612e-294	2.17968e-291
Sus_scrofa___SASH1	36.4804	2.51202	2.27018e-291	6.90366e-289
Sus_scrofa___ADAMTS12	36.1528	3.08596	3.36614e-286	9.95527e-284
Sus_scrofa___ZNF521	36.049	1.93407	1.4307e-284	4.16263e-282
Sus_scrofa___MAP3K1	36.0159	3.7263	4.71406e-284	1.36419e-281
Sus_scrofa___BMP6	35.9467	4.06726	5.70087e-283	1.63221e-280
Sus_scrofa___ARHGAP18	35.7711	4.11595	3.10412e-280	8.79382e-278
Sus_scrofa___ITPR1	35.4148	3.12316	1.01137e-274	2.83531e-272
Sus_scrofa___SNRK	35.2196	3.36723	1.00235e-271	2.79545e-269
Sus_scrofa___GAS7	35.1773	3.45741	4.45134e-271	1.21623e-268
Sus_scrofa___SBF2	35.1721	1.41012	5.3497e-271	1.45431e-268
Sus_scrofa___MGAT5	35.0291	1.63431	8.10353e-269	2.19186e-266
Sus_scrofa___GNAQ	35.0137	2.15134	1.39221e-268	3.74684e-266
Sus_scrofa___ZBTB20	34.8957	1.10428	8.63723e-267	2.29018e-264
Sus_scrofa___TRPC6	34.81	5.28691	1.71819e-265	4.51139e-263
Sus_scrofa___AKAP12	34.6066	4.18961	2.011e-262	5.15449e-260
Sus_scrofa___DISC1	34.3232	2.78267	3.53898e-258	8.85997e-256
Sus_scrofa___NOS1AP	34.0009	5.00755	2.16304e-253	5.26823e-251
Sus_scrofa___DGKH	33.895	2.01134	7.90351e-252	1.90769e-249
Sus_scrofa___MRC1	33.7354	4.69507	1.74801e-249	4.14485e-247
Sus_scrofa___PLPP1	33.7144	1.84783	3.55893e-249	8.40188e-247
Sus_scrofa___GALNT18	33.6666	3.70025	1.78116e-248	4.18658e-246
Sus_scrofa___ENSSSCG00000006418	33.4153	4.26555	8.22283e-245	1.89958e-242
Sus_scrofa___YES1	33.3426	3.06207	9.33815e-244	2.14801e-241
Sus_scrofa___ZDHHC20	33.3009	2.68432	3.75009e-243	8.58947e-241
Sus_scrofa___LTBP1	33.2325	2.94299	3.6554e-242	8.30192e-240
Sus_scrofa___PALD1	33.2264	5.19552	4.47053e-242	1.01105e-239
Sus_scrofa___ENSSSCG00000039658	32.9944	3.84365	9.78456e-239	2.1763e-236

## Sheet: Lymph_papio
Gene	scores	log2FC	pvals	FDR
Papio_anubis_PTPRC	82.5109	6.61294	0	0
Papio_anubis_ARHGAP15	80.2609	5.92901	0	0
Papio_anubis_RABGAP1L	78.1574	6.49571	0	0
Papio_anubis_MBNL1	77.8512	6.02326	0	0
Papio_anubis_RIPOR2	76.4841	8.4286	0	0
Papio_anubis_ANKRD44	75.9983	6.01157	0	0
Papio_anubis_CBLB	74.0949	7.45143	0	0
Papio_anubis_TNIK	69.3314	7.82506	0	0
Papio_anubis_PRKCH	67.0687	8.73331	0	0
Papio_anubis_FNBP1	66.3397	5.535	0	0
Papio_anubis_BCL2	65.9889	6.95303	0	0
Papio_anubis_DOCK2	64.8113	5.47029	0	0
Papio_anubis_CHST11	64.5177	5.57205	0	0
Papio_anubis_TOX	61.2728	6.58207	0	0
Papio_anubis_PRKCA	61.2225	6.84432	0	0
Papio_anubis_VPS13B	59.8717	5.06558	0	0
Papio_anubis_PITPNC1	59.6161	7.68045	0	0
Papio_anubis_SKAP1	59.1512	10.0218	0	0
Papio_anubis_CD247	58.2739	10.2688	0	0
Papio_anubis_ANKRD11	57.1859	5.62126	0	0
Papio_anubis_CELF2	56.3656	5.41387	0	0
Papio_anubis_ELMO1	55.0815	4.7121	0	0
Papio_anubis_ETS1	54.773	9.23669	0	0
Papio_anubis_AKAP13	54.704	4.66525	0	0
Papio_anubis_ASH1L	54.4214	5.03963	0	0
Papio_anubis_CCND3	54.2757	7.74006	0	0
Papio_anubis_PIP4K2A	54.2174	5.74336	0	0
Papio_anubis_EML4	52.3479	6.03933	0	0
Papio_anubis_UTRN	52.2712	5.79722	0	0
Papio_anubis_SSH2	51.9845	4.75577	0	0
Papio_anubis_MAML2	51.8726	4.94932	0	0
Papio_anubis_ARID1B	51.7218	4.97454	0	0
Papio_anubis_TBC1D5	51.5611	4.8958	0	0
Papio_anubis_AHI1	51.5093	7.56358	0	0
Papio_anubis_FYN	51.3293	8.77547	0	0
Papio_anubis_INPP4B	51.286	9.03155	0	0
Papio_anubis_IQGAP2	51.2553	4.90165	0	0
Papio_anubis_RUNX1	51.0699	4.67705	0	0
Papio_anubis_AKT3	50.9284	6.48495	0	0
Papio_anubis_MSI2	49.9081	6.37807	0	0
Papio_anubis_SMYD3	49.9049	5.09656	0	0
Papio_anubis_MYCBP2	49.725	5.36066	0	0
Papio_anubis_USP34	49.2764	5.1335	0	0
Papio_anubis_ARAP2	49.1636	6.09726	0	0
Papio_anubis_TSPAN5	48.8599	9.16017	0	0
Papio_anubis_STAG1	48.5522	5.09301	0	0
Papio_anubis_TXK	48.4528	9.68079	0	0
Papio_anubis_IKZF1	48.3563	5.88341	0	0
Papio_anubis_PARP8	48.3043	5.49784	0	0
Papio_anubis_DOCK10	47.9772	4.79247	0	0
Papio_anubis_ABTB3	47.7801	8.82551	0	0
Papio_anubis_USP15	47.0919	4.77857	0	0
Papio_anubis_THEMIS	47.0437	10.3174	0	0
Papio_anubis_PICALM	46.9302	4.90931	0	0
Papio_anubis_ITGA4	46.4521	5.90902	0	0
Papio_anubis_SH3KBP1	46.1135	5.25109	0	0
Papio_anubis_SORL1	46.0048	6.71899	0	0
Papio_anubis_KMT2C	45.9614	4.51289	0	0
Papio_anubis_INPP5D	45.5147	4.21312	0	0
Papio_anubis_STAT4	45.122	9.07259	0	0
Papio_anubis_SLFN12L	45.0319	8.63343	0	0
Papio_anubis_ENSPANG00000006422	44.8265	5.0396	0	0
Papio_anubis_FAM172A	44.6848	5.04701	0	0
Papio_anubis_IFI16	44.3973	4.64725	0	0
Papio_anubis_SEMA4D	43.4904	7.09387	0	0
Papio_anubis_JMJD1C	43.366	4.39388	0	0
Papio_anubis_MED13L	43.3595	4.27556	0	0
Papio_anubis_ATP10A	43.2228	7.41838	0	0
Papio_anubis_ZNF609	42.8565	4.79045	0	0
Papio_anubis_CAMK4	42.8416	9.77515	0	0
Papio_anubis_ENSPANG00000005647	42.683	4.30617	0	0
Papio_anubis_ZFAND3	42.6634	4.47694	0	0
Papio_anubis_TBL1XR1	42.3792	5.13961	0	0
Papio_anubis_THADA	42.262	5.24134	0	0
Papio_anubis_GNB1	42.2366	4.64831	0	0
Papio_anubis_MBP	41.9399	5.00296	0	0
Papio_anubis_FOXN3	41.2527	4.00499	0	0
Papio_anubis_COG5	41.1252	4.82836	0	0
Papio_anubis_GNG2	41.0804	6.23641	0	0
Papio_anubis_SCAPER	40.7439	5.1521	0	0
Papio_anubis_MACF1	40.7041	4.40027	0	0
Papio_anubis_KAT6A	40.6675	5.42916	0	0
Papio_anubis_ENSPANG00000026399	40.575	4.30865	0	0
Papio_anubis_NFATC3	40.5725	5.33914	0	0
Papio_anubis_LCP2	40.5222	5.0108	0	0
Papio_anubis_VTI1A	40.4265	4.51009	0	0
Papio_anubis_MLLT3	39.9922	8.06004	0	0
Papio_anubis_LRBA	39.9884	5.58019	0	0
Papio_anubis_ARID4B	39.9513	4.94352	0	0
Papio_anubis_CHD2	39.8073	4.98467	0	0
Papio_anubis_ACAP2	39.6921	4.41431	0	0
Papio_anubis_PTPN22	39.6004	7.36833	0	0
Papio_anubis_PDE7B	39.5447	6.93013	0	0
Papio_anubis_FAF1	39.4625	4.9437	0	0
Papio_anubis_EIF4G3	39.4154	4.58394	0	0
Papio_anubis_RASGRP1	39.0929	6.44846	0	0
Papio_anubis_UBASH3B	38.5346	5.34922	0	0
Papio_anubis_CMIP	38.495	4.01245	0	0
Papio_anubis_RASA2	38.4748	5.23921	0	0
Papio_anubis_VAV3	38.2713	4.28796	0	0

## Sheet: FB
Gene	scores	log2FC	pvals	FDR
Sus_scrofa___EBF1	187.925	5.90814	0	0
Sus_scrofa___BICC1	182.082	7.1257	0	0
Sus_scrofa___RBMS3	180.294	5.21702	0	0
Sus_scrofa___PLXDC2	174.75	5.37662	0	0
Sus_scrofa___BNC2	168.762	7.76023	0	0
Sus_scrofa___COL5A2	164.969	5.49112	0	0
Sus_scrofa___PID1	162.228	5.36251	0	0
Sus_scrofa___SPON1	160.65	4.99762	0	0
Sus_scrofa___MAML2	158.049	3.74774	0	0
Sus_scrofa___FBN1	155.115	5.46385	0	0
Sus_scrofa___PLCB1	154.999	5.0387	0	0
Sus_scrofa___SOX5	154.59	5.02077	0	0
Sus_scrofa___NFIA	143.031	1.88756	0	0
Sus_scrofa___TGFBR3	140.886	4.41376	0	0
Sus_scrofa___PLSCR4	140.645	5.64259	0	0
Sus_scrofa___GLI3	140.097	4.46678	0	0
Sus_scrofa___TCF4	138.532	2.85088	0	0
Sus_scrofa___ATRNL1	138.198	5.99324	0	0
Sus_scrofa___COL3A1	136.364	6.35502	0	0
Sus_scrofa___ENSSSCG00000044700	135.006	2.78617	0	0
Sus_scrofa___COL6A3	134.529	6.51689	0	0
Sus_scrofa___LPAR1	133.395	7.22324	0	0
Sus_scrofa___PLOD2	132.98	4.29833	0	0
Sus_scrofa___RORA	131.537	2.30229	0	0
Sus_scrofa___EXT1	131.449	2.12722	0	0
Sus_scrofa___ADGRD1	131.129	4.48015	0	0
Sus_scrofa___EPB41L2	130.195	4.27127	0	0
Sus_scrofa___MED13L	128.341	1.54982	0	0
Sus_scrofa___PDGFRA	127.238	7.62405	0	0
Sus_scrofa___AUTS2	126.682	2.28424	0	0
Sus_scrofa___EGFR	125.3	6.52045	0	0
Sus_scrofa___ZEB1	125.208	2.15437	0	0
Sus_scrofa___COL1A2	124.852	6.49363	0	0
Sus_scrofa___COL8A1	124.756	6.50918	0	0
Sus_scrofa___GSN	123.635	5.0265	0	0
Sus_scrofa___TCF7L2	122.556	2.7328	0	0
Sus_scrofa___NOL11	121.473	3.7267	0	0
Sus_scrofa___LTBP1	119.328	3.79256	0	0
Sus_scrofa___PARD3	117.658	1.49479	0	0
Sus_scrofa___ENSSSCG00000003839	117.461	2.99164	0	0
Sus_scrofa___C7	117.424	7.06171	0	0
Sus_scrofa___LAMC1	117.056	1.85618	0	0
Sus_scrofa___FNDC3B	116.406	1.35506	0	0
Sus_scrofa___PTGIS	115.942	7.05719	0	0
Sus_scrofa___AKT3	115.434	3.45529	0	0
Sus_scrofa___SH3D19	115.088	4.16798	0	0
Sus_scrofa___ANTXR1	113.826	4.73283	0	0
Sus_scrofa___NID1	113.718	2.57002	0	0
Sus_scrofa___DCN	112.884	7.25093	0	0
Sus_scrofa___GLI2	111.986	5.79493	0	0
Sus_scrofa___PDGFD	111.042	2.99107	0	0
Sus_scrofa___PDE1A	111.031	4.64553	0	0
Sus_scrofa___PTPN13	110.817	4.79144	0	0
Sus_scrofa___CDH11	109.49	6.34168	0	0
Sus_scrofa___SOBP	109.217	5.66856	0	0
Sus_scrofa___SASH1	109.101	3.00621	0	0
Sus_scrofa___PRKG1	108.731	2.24512	0	0
Sus_scrofa___FAM171A1	108.487	4.36815	0	0
Sus_scrofa___TRPS1	108.291	3.24254	0	0
Sus_scrofa___APBB2	107.53	2.44077	0	0
Sus_scrofa___EPS8	106.847	3.42915	0	0
Sus_scrofa___PRKD1	106.335	4.03374	0	0
Sus_scrofa___EBF2	106.309	4.09794	0	0
Sus_scrofa___ZBTB20	106.265	1.17096	0	0
Sus_scrofa___FMNL2	105.271	4.30995	0	0
Sus_scrofa___LAMB1	104.41	4.04001	0	0
Sus_scrofa___DDR2	104.392	5.05457	0	0
Sus_scrofa___CLMP	104.291	7.19036	0	0
Sus_scrofa___CALD1	103.379	1.70777	0	0
Sus_scrofa___PDE7B	102.629	3.09766	0	0
Sus_scrofa___SULF1	101.554	4.52477	0	0
Sus_scrofa___NAALADL2	100.674	2.68684	0	0
Sus_scrofa___WASF3	100.315	5.18252	0	0
Sus_scrofa___DPYD	99.7691	2.16359	0	0
Sus_scrofa___TTC28	99.6904	1.36071	0	0
Sus_scrofa___COLEC12	98.5166	4.38419	0	0
Sus_scrofa___COL4A2	98.5162	1.85273	0	0
Sus_scrofa___SRGAP1	98.2824	4.48857	0	0
Sus_scrofa___CREB3L2	98.249	2.8624	0	0
Sus_scrofa___COL14A1	98.0374	6.65469	0	0
Sus_scrofa___NOVA1	97.164	3.3463	0	0
Sus_scrofa___RRBP1	97.0026	4.30123	0	0
Sus_scrofa___COL5A1	96.7057	5.322	0	0
Sus_scrofa___GXYLT2	96.164	7.91357	0	0
Sus_scrofa___VCAN	95.7483	2.93457	0	0
Sus_scrofa___IL1R1	95.5019	4.9134	0	0
Sus_scrofa___STAG1	94.4232	1.36532	0	0
Sus_scrofa___FNDC3A	94.084	2.00872	0	0
Sus_scrofa___ABCA6	94.0754	6.63982	0	0
Sus_scrofa___CDC42BPA	93.1353	1.64734	0	0
Sus_scrofa___RBMS1	93.0502	1.68267	0	0
Sus_scrofa___CCND3	93.0288	3.77514	0	0
Sus_scrofa___TGFBR2	92.9694	2.64741	0	0
Sus_scrofa___VPS13B	92.7924	1.54336	0	0
Sus_scrofa___GNAQ	91.8855	2.16667	0	0
Sus_scrofa___CGNL1	91.8602	4.7907	0	0
Sus_scrofa___ZEB2	91.8229	2.23759	0	0
Sus_scrofa___KIRREL1	90.9819	3.81063	0	0
Sus_scrofa___DAB2	89.3702	3.55601	0	0
Sus_scrofa___REXO2	89.3327	3.04967	0	0

## Sheet: Mast_papio
Gene	scores	log2FC	pvals	FDR
Papio_anubis_ENSPANG00000005647	12.2006	6.62785	3.08709e-34	8.30827e-30
Papio_anubis_LRMDA	11.477	6.12789	1.72137e-30	5.45027e-27
Papio_anubis_ZEB2	10.9971	5.5717	3.94727e-28	6.63955e-25
Papio_anubis_ENPP3	10.8378	12.9818	2.27919e-27	2.99218e-24
Papio_anubis_NRG1	10.4116	11.6289	2.19475e-25	1.73728e-22
Papio_anubis_PRKCA	10.3994	6.71258	2.49622e-25	1.94727e-22
Papio_anubis_ARHGAP15	10.0315	4.9405	1.10809e-23	6.62711e-21
Papio_anubis_MITF	9.96653	6.36997	2.13571e-23	1.19747e-20
Papio_anubis_AGAP1	9.90424	7.4847	3.98987e-23	2.12632e-20
Papio_anubis_CPA3	9.58706	12.7332	9.06323e-22	3.69574e-19
Papio_anubis_ASH1L	9.46115	5.1198	3.0457e-21	1.12286e-18
Papio_anubis_ANKRD44	9.44557	4.69246	3.53477e-21	1.2943e-18
Papio_anubis_AKAP13	9.36407	4.93396	7.6726e-21	2.69925e-18
Papio_anubis_MAML3	9.34411	5.41906	9.2667e-21	3.23889e-18
Papio_anubis_PBX1	9.0896	7.78633	9.94081e-20	3.14749e-17
Papio_anubis_TTC28	9.07884	7.45813	1.09739e-19	3.43419e-17
Papio_anubis_RAP1GAP2	9.00181	6.63908	2.2203e-19	6.42527e-17
Papio_anubis_GALC	8.86573	7.31606	7.60023e-19	2.01522e-16
Papio_anubis_SNX29	8.80082	4.94199	1.35818e-18	3.44531e-16
Papio_anubis_ETV6	8.78276	4.48713	1.59512e-18	3.97495e-16
Papio_anubis_MBNL1	8.60111	4.48799	7.89518e-18	1.7781e-15
Papio_anubis_RPS6KA5	8.56485	6.33984	1.0822e-17	2.41704e-15
Papio_anubis_RUNX1	8.55908	4.84338	1.13767e-17	2.53043e-15
Papio_anubis_CHST11	8.55128	4.79412	1.21735e-17	2.68544e-15
Papio_anubis_PPP3CA	8.54922	5.29608	1.23925e-17	2.70398e-15
Papio_anubis_SLC24A3	8.50872	8.67912	1.75869e-17	3.76578e-15
Papio_anubis_EPS15	8.47319	4.99232	2.38767e-17	5.05383e-15
Papio_anubis_VAV3	8.41563	4.86199	3.90785e-17	7.99787e-15
Papio_anubis_SYTL3	8.4083	6.87843	4.16013e-17	8.48194e-15
Papio_anubis_UTRN	8.39367	5.3968	4.71202e-17	9.49922e-15
Papio_anubis_LRBA	8.3065	5.89424	9.85649e-17	1.91529e-14
Papio_anubis_SMYD3	8.29468	5.13841	1.08876e-16	2.10804e-14
Papio_anubis_ARID1B	8.24261	4.90304	1.68495e-16	3.14909e-14
Papio_anubis_EIF4G3	8.11086	5.09767	5.02633e-16	8.8704e-14
Papio_anubis_BMP2K	8.00162	5.36822	1.22792e-15	2.04625e-13
Papio_anubis_STXBP5	7.99915	6.76194	1.25276e-15	2.07481e-13
Papio_anubis_DENND1B	7.99141	5.30811	1.33408e-15	2.2027e-13
Papio_anubis_MSI2	7.81321	5.56756	5.57495e-15	8.50077e-13
Papio_anubis_EXOC6B	7.73025	5.04728	1.07332e-14	1.60035e-12
Papio_anubis_KMT2C	7.70991	4.44217	1.25902e-14	1.85801e-12
Papio_anubis_GNAQ	7.68924	4.94082	1.48011e-14	2.1649e-12
Papio_anubis_KIT	7.50331	12.8733	6.22269e-14	8.16933e-12
Papio_anubis_AP1S3	7.49197	9.98547	6.78499e-14	8.84282e-12
Papio_anubis_MTSS1	7.49079	4.40494	6.846e-14	8.90079e-12
Papio_anubis_VPS13B	7.47476	4.35394	7.73476e-14	9.96007e-12
Papio_anubis_DAPK1	7.43989	5.52835	1.0077e-13	1.28228e-11
Papio_anubis_DST	7.36285	6.4614	1.80027e-13	2.23791e-11
Papio_anubis_TBC1D5	7.3063	4.35268	2.74606e-13	3.37464e-11
Papio_anubis_SH3KBP1	7.2973	4.89166	2.93588e-13	3.5997e-11
Papio_anubis_INPP5D	7.23726	4.26683	4.57845e-13	5.4522e-11
Papio_anubis_RERE	7.20577	4.61498	5.77161e-13	6.81278e-11
Papio_anubis_DOCK2	7.1775	4.03135	7.0999e-13	8.27184e-11
Papio_anubis_PAG1	7.15727	6.40482	8.22975e-13	9.48554e-11
Papio_anubis_MED13L	7.10447	4.37356	1.20786e-12	1.36013e-10
Papio_anubis_SSH2	7.08395	4.31538	1.40104e-12	1.54711e-10
Papio_anubis_ACAP2	7.04334	4.73166	1.87688e-12	2.02862e-10
Papio_anubis_SDCCAG8	7.01909	4.59219	2.2332e-12	2.3945e-10
Papio_anubis_RIPOR2	6.98604	5.31882	2.82747e-12	2.99e-10
Papio_anubis_STX3	6.98287	6.70139	2.89218e-12	3.05244e-10
Papio_anubis_SPIDR	6.95795	5.08276	3.45254e-12	3.60148e-10
Papio_anubis_ELMO1	6.9523	4.04373	3.5939e-12	3.73447e-10
Papio_anubis_LYN	6.76813	4.39109	1.30453e-11	1.2884e-09
Papio_anubis_IQGAP2	6.7109	4.27256	1.93433e-11	1.85592e-09
Papio_anubis_ZNF521	6.66645	11.1189	2.62072e-11	2.48192e-09
Papio_anubis_RABGAP1L	6.62972	4.06944	3.36333e-11	3.14296e-09
Papio_anubis_CD226	6.62758	7.87868	3.41246e-11	3.17783e-09
Papio_anubis_FAM172A	6.61522	4.44356	3.71001e-11	3.43709e-09
Papio_anubis_PTPRE	6.58964	5.22054	4.40893e-11	4.02912e-09
Papio_anubis_GNB1	6.58371	4.40759	4.58852e-11	4.17967e-09
Papio_anubis_ZFAND3	6.55412	4.35218	5.59703e-11	5.03789e-09
Papio_anubis_FOXP1	6.46575	4.64908	1.008e-10	8.83658e-09
Papio_anubis_DIAPH2	6.43963	4.12711	1.19762e-10	1.03472e-08
Papio_anubis_USP34	6.39557	4.44032	1.59954e-10	1.36879e-08
Papio_anubis_BACE2	6.39335	7.16774	1.62293e-10	1.3866e-08
Papio_anubis_STAG1	6.38822	4.37786	1.6783e-10	1.42937e-08
Papio_anubis_CUX1	6.38198	4.38787	1.74816e-10	1.48183e-08
Papio_anubis_PRKAG2	6.38114	5.16724	1.75777e-10	1.4853e-08
Papio_anubis_QKI	6.34802	3.88106	2.18106e-10	1.82295e-08
Papio_anubis_FBXW7	6.32955	4.92422	2.45874e-10	2.04141e-08
Papio_anubis_WWOX	6.32939	4.96285	2.46141e-10	2.04141e-08
Papio_anubis_ITPR2	6.32696	4.79183	2.50044e-10	2.0706e-08
Papio_anubis_JARID2	6.31536	4.21426	2.69538e-10	2.21837e-08
Papio_anubis_CERS6	6.2549	5.52576	3.97764e-10	3.2244e-08
Papio_anubis_VWA5A	6.22849	8.59283	4.70941e-10	3.78907e-08
Papio_anubis_ACOXL	6.19925	7.35691	5.67324e-10	4.4907e-08
Papio_anubis_VTI1A	6.19806	4.41496	5.71638e-10	4.51158e-08
Papio_anubis_CCDC88A	6.18092	5.02702	6.37308e-10	4.98601e-08
Papio_anubis_FNBP1	6.15846	3.76542	7.34544e-10	5.71352e-08
Papio_anubis_ACSL4	6.14419	6.37591	8.03702e-10	6.20661e-08
Papio_anubis_CAMK1D	6.14383	4.8822	8.0554e-10	6.21189e-08
Papio_anubis_NFATC3	6.13171	4.82313	8.69424e-10	6.66632e-08
Papio_anubis_PALM2AKAP2	6.09804	5.96145	1.07376e-09	8.10606e-08
Papio_anubis_NEDD9	6.0904	5.83311	1.12627e-09	8.46683e-08
Papio_anubis_WAC	6.08743	4.66921	1.14736e-09	8.61335e-08
Papio_anubis_ARL15	6.06426	4.58126	1.32564e-09	9.86913e-08
Papio_anubis_ENSPANG00000050665	6.04475	13.3866	1.49641e-09	1.10337e-07
Papio_anubis_SPRED1	6.00433	5.22559	1.92122e-09	1.40124e-07
Papio_anubis_PAN3	5.97593	4.16546	2.28778e-09	1.65291e-07
Papio_anubis_SRGN	5.95907	4.98437	2.53679e-09	1.82547e-07
Papio_anubis_GAS7	5.88825	4.00964	3.90307e-09	2.74265e-07

## Sheet: MC
Gene	scores	log2FC	pvals	FDR
Sus_scrofa___PRKG1	109.694	4.64791	0	0
Sus_scrofa___EPS8	100.875	6.08802	0	0
Sus_scrofa___MAST4	99.9303	3.12744	0	0
Sus_scrofa___RBMS3	99.1336	4.76756	0	0
Sus_scrofa___EBF1	99.0049	4.97983	0	0
Sus_scrofa___CALD1	96.78	3.25263	0	0
Sus_scrofa___EBF2	95.4021	6.02897	0	0
Sus_scrofa___SOX5	91.2996	4.93153	0	0
Sus_scrofa___GJC1	91.1746	6.46852	0	0
Sus_scrofa___PDE10A	89.4532	5.71263	0	0
Sus_scrofa___GUCY1A2	88.2028	7.70904	0	0
Sus_scrofa___ADAMTS12	87.3526	5.37096	0	0
Sus_scrofa___FARP1	83.752	3.94934	0	0
Sus_scrofa___DLC1	83.1824	1.96936	0	0
Sus_scrofa___MYO1B	82.8572	6.45818	0	0
Sus_scrofa___FRMD4A	82.5287	4.41631	0	0
Sus_scrofa___FRMD3	82.4012	5.43345	0	0
Sus_scrofa___ENSSSCG00000044700	81.9193	3.07085	0	0
Sus_scrofa___PDGFRB	81.8418	6.649	0	0
Sus_scrofa___EGFLAM	81.1	6.88443	0	0
Sus_scrofa___CYTH3	80.9441	3.84847	0	0
Sus_scrofa___PDE1C	80.3207	5.44361	0	0
Sus_scrofa___DAAM2	77.5591	6.30248	0	0
Sus_scrofa___GRM7	77.3602	7.9498	0	0
Sus_scrofa___ENSSSCG00000032383	76.1747	4.8186	0	0
Sus_scrofa___CPM	75.0054	5.63788	0	0
Sus_scrofa___IGFBP7	74.2066	4.03744	0	0
Sus_scrofa___RGS5	74.0895	8.23697	0	0
Sus_scrofa___AGAP1	73.1863	1.98745	0	0
Sus_scrofa___P3H2	71.7889	5.60028	0	0
Sus_scrofa___KIRREL1	70.8868	4.86939	0	0
Sus_scrofa___ARHGAP10	69.3558	2.16088	0	0
Sus_scrofa___MAML2	69.3275	2.888	0	0
Sus_scrofa___ITGA1	68.0741	4.68058	0	0
Sus_scrofa___PHACTR2	66.0666	3.41526	0	0
Sus_scrofa___LHFPL6	65.7285	3.04809	0	0
Sus_scrofa___COL4A2	65.2876	2.27024	0	0
Sus_scrofa___GUCY1B1	64.6264	6.58611	0	0
Sus_scrofa___ITPR1	61.8797	4.01572	0	0
Sus_scrofa___LDB2	61.845	3.74982	0	0
Sus_scrofa___SULF1	61.6394	4.28779	0	0
Sus_scrofa___NCALD	60.9152	5.09983	0	0
Sus_scrofa___PLXDC2	60.0329	3.08723	0	0
Sus_scrofa___SASH1	59.1244	3.13698	0	0
Sus_scrofa___ITIH5	58.9679	4.90529	0	0
Sus_scrofa___ARHGAP6	58.3183	4.56194	0	0
Sus_scrofa___RORA	58.061	1.90199	0	0
Sus_scrofa___COL5A3	57.849	4.91567	0	0
Sus_scrofa___PDE7B	57.2681	3.21427	0	0
Sus_scrofa___EXT1	57.1137	1.71155	0	0
Sus_scrofa___PLCL1	57.0195	2.71668	0	0
Sus_scrofa___GUCY1A1	55.729	4.61994	0	0
Sus_scrofa___AKT3	55.5292	3.17268	0	0
Sus_scrofa___ZEB2	53.9621	2.61673	0	0
Sus_scrofa___ADGRF5	52.0624	4.08841	0	0
Sus_scrofa___TNFRSF21	51.6889	5.78893	0	0
Sus_scrofa___CAMK1D	51.567	4.60884	0	0
Sus_scrofa___PEAR1	51.2556	5.05608	0	0
Sus_scrofa___PELI2	51.2098	3.02537	0	0
Sus_scrofa___NRP1	50.8949	2.10025	0	0
Sus_scrofa___RASAL2	50.8416	2.35604	0	0
Sus_scrofa___APBB2	50.4637	2.34225	0	0
Sus_scrofa___ZEB1	49.907	1.63599	0	0
Sus_scrofa___PTPN13	49.6785	3.71835	0	0
Sus_scrofa___EDNRB	49.523	6.83943	0	0
Sus_scrofa___PARD3	49.5066	1.19834	0	0
Sus_scrofa___TCF4	48.8186	1.92096	0	0
Sus_scrofa___PDE1A	48.6471	3.6757	0	0
Sus_scrofa___SEPTIN11	48.4601	3.70028	0	0
Sus_scrofa___PREX2	48.17	3.66619	0	0
Sus_scrofa___CDC42BPA	47.9108	1.72443	0	0
Sus_scrofa___ARHGAP42	47.7366	3.08114	0	0
Sus_scrofa___ANO1	47.4466	7.25589	0	0
Sus_scrofa___SH3RF1	46.8507	4.75533	0	0
Sus_scrofa___ENSSSCG00000014822	46.0766	4.03397	0	0
Sus_scrofa___TRPC6	45.8108	6.52315	0	0
Sus_scrofa___SLC12A2	45.6275	3.76164	0	0
Sus_scrofa___SPRY1	44.8967	3.5017	0	0
Sus_scrofa___PID1	43.6121	2.64801	0	0
Sus_scrofa___STK39	43.5865	2.9828	0	0
Sus_scrofa___NEURL1B	43.4276	6.32634	0	0
Sus_scrofa___AUTS2	43.4169	1.54144	0	0
Sus_scrofa___RAPGEF2	43.2768	1.36811	0	0
Sus_scrofa___TTC7B	42.6103	1.97904	0	0
Sus_scrofa___PALM2AKAP2	42.4089	1.24124	0	0
Sus_scrofa___KCNAB1	41.6933	4.33867	0	0
Sus_scrofa___C3orf70	40.4319	4.12289	0	0
Sus_scrofa___STUM	40.2132	7.85941	0	0
Sus_scrofa___IL1RAP	40.0572	4.59242	0	0
Sus_scrofa___NOTCH3	40.0093	7.07732	0	0
Sus_scrofa___MYO1D	39.0217	3.01785	0	0
Sus_scrofa___UTRN	38.6505	1.20354	0	0
Sus_scrofa___MOB3B	38.3994	3.91996	0	0
Sus_scrofa___CYP20A1	38.1414	1.60327	0	0
Sus_scrofa___MAP4K4	38.0588	2.37337	0	0
Sus_scrofa___RASGEF1B	38.0089	3.76367	0	0
Sus_scrofa___NHSL2	37.5434	4.30203	0	1.86381e-306
Sus_scrofa___KCNJ8	37.1493	3.22764	4.49598e-302	4.57468e-300
Sus_scrofa___NOSTRIN	36.9544	4.64634	6.18268e-299	6.19719e-297
Sus_scrofa___ENSSSCG00000028092	36.9216	4.40941	2.07984e-298	2.07314e-296

## Sheet: Mye_papio
Gene	scores	log2FC	pvals	FDR
Papio_anubis_DPYD	133.551	8.35241	0	0
Papio_anubis_ZEB2	132.687	8.6381	0	0
Papio_anubis_ETV6	127.927	8.05216	0	0
Papio_anubis_SLC8A1	127.603	9.87869	0	0
Papio_anubis_ENSPANG00000018738	120.133	8.7728	0	0
Papio_anubis_QKI	119.313	7.85849	0	0
Papio_anubis_ARHGAP15	119.043	6.3995	0	0
Papio_anubis_ELMO1	117.471	6.84174	0	0
Papio_anubis_SNX29	115.851	8.0427	0	0
Papio_anubis_FOXN3	115.088	7.25319	0	0
Papio_anubis_INPP5D	114.059	7.08664	0	0
Papio_anubis_MTSS1	112.712	8.21866	0	0
Papio_anubis_AKAP13	110.887	6.72687	0	0
Papio_anubis_DOCK4	110.106	9.52062	0	0
Papio_anubis_CMIP	109.639	7.06089	0	0
Papio_anubis_LRMDA	109.283	9.03194	0	0
Papio_anubis_SLC9A9	109.169	7.90549	0	0
Papio_anubis_MBNL1	108.117	5.96665	0	0
Papio_anubis_MEF2C	107.103	9.51561	0	0
Papio_anubis_RBPJ	106.685	7.4954	0	0
Papio_anubis_VPS13B	106.073	6.32688	0	0
Papio_anubis_MED13L	104.658	6.80084	0	0
Papio_anubis_GAS7	103.767	7.68006	0	0
Papio_anubis_FRMD4B	103.127	8.94238	0	0
Papio_anubis_LYN	102.212	8.62526	0	0
Papio_anubis_ANKRD44	101.979	5.81517	0	0
Papio_anubis_RUNX1	101.789	6.70397	0	0
Papio_anubis_SSH2	100.263	6.52902	0	0
Papio_anubis_ENSPANG00000005647	99.1953	6.76703	0	0
Papio_anubis_FNBP1	98.1156	5.96303	0	0
Papio_anubis_PLXDC2	98.0351	9.54699	0	0
Papio_anubis_FMNL2	97.9639	9.42774	0	0
Papio_anubis_DOCK2	97.8742	6.0093	0	0
Papio_anubis_MAML2	97.4078	6.35956	0	0
Papio_anubis_KMT2C	97.1633	6.43389	0	0
Papio_anubis_JMJD1C	96.9599	6.55936	0	0
Papio_anubis_OSBPL9	95.7519	7.39299	0	0
Papio_anubis_VAV3	95.6062	6.68721	0	0
Papio_anubis_UBE2E2	95.4947	8.55776	0	0
Papio_anubis_MAML3	95.4196	8.40547	0	0
Papio_anubis_ARHGAP24	95.1956	9.14969	0	0
Papio_anubis_MEF2A	95.0765	7.37304	0	0
Papio_anubis_LPP	95.0085	6.79998	0	0
Papio_anubis_SBF2	94.8939	7.5253	0	0
Papio_anubis_TBC1D5	94.6536	6.21761	0	0
Papio_anubis_JARID2	94.1935	6.93552	0	0
Papio_anubis_SDCCAG8	93.6187	7.79397	0	0
Papio_anubis_CHST11	93.3453	5.93814	0	0
Papio_anubis_ZFAND3	93.1174	6.43962	0	0
Papio_anubis_ASH1L	92.9642	6.07098	0	0
Papio_anubis_DENND1A	91.6004	7.07725	0	0
Papio_anubis_IQGAP2	91.0886	6.28608	0	0
Papio_anubis_EPS15	90.5198	7.08739	0	0
Papio_anubis_CUX1	90.4784	6.8955	0	0
Papio_anubis_PTPRC	90.0602	5.2397	0	0
Papio_anubis_TBC1D22A	89.8842	6.65793	0	0
Papio_anubis_CARMIL1	89.5285	7.41112	0	0
Papio_anubis_DOCK10	89.4776	6.25987	0	0
Papio_anubis_FLI1	88.6081	6.62858	0	0
Papio_anubis_IFI16	88.168	6.26885	0	0
Papio_anubis_AFF1	88.0112	6.92345	0	0
Papio_anubis_KCNMA1	87.8649	9.87405	0	0
Papio_anubis_TRPS1	87.6264	7.07637	0	0
Papio_anubis_ARID1B	87.6103	5.92479	0	0
Papio_anubis_RNF149	87.5853	7.66558	0	0
Papio_anubis_RERE	87.1614	6.52598	0	0
Papio_anubis_ACAP2	86.8256	6.30228	0	0
Papio_anubis_MARCHF1	86.7058	8.79475	0	0
Papio_anubis_EPSTI1	86.6065	6.98055	0	0
Papio_anubis_GNAQ	85.5435	6.84591	0	0
Papio_anubis_RABGAP1L	85.4066	5.20563	0	0
Papio_anubis_ENSPANG00000026399	85.3867	6.03923	0	0
Papio_anubis_DIAPH2	85.3405	5.99736	0	0
Papio_anubis_CD74	84.3205	8.93842	0	0
Papio_anubis_EXOC4	84.0272	6.43858	0	0
Papio_anubis_VTI1A	83.9001	6.27767	0	0
Papio_anubis_GAB2	83.245	9.43195	0	0
Papio_anubis_RPS6KC1	82.7563	6.97936	0	0
Papio_anubis_SMYD3	82.7394	5.95012	0	0
Papio_anubis_PICALM	81.6963	5.97152	0	0
Papio_anubis_FRMD4A	81.652	9.24952	0	0
Papio_anubis_GNB1	81.6439	6.12073	0	0
Papio_anubis_MACF1	80.6788	5.70606	0	0
Papio_anubis_FGD4	80.4584	9.06159	0	0
Papio_anubis_PHIP	80.0377	6.3082	0	0
Papio_anubis_USP15	79.977	5.53134	0	0
Papio_anubis_TUT7	79.9511	7.4818	0	0
Papio_anubis_CELF2	79.9445	5.6551	0	0
Papio_anubis_WSB1	78.9968	7.22268	0	0
Papio_anubis_DOCK8	78.4695	6.29375	0	0
Papio_anubis_ZNF609	78.4581	6.02599	0	0
Papio_anubis_JAK2	78.1647	7.67504	0	0
Papio_anubis_MANBA	77.7364	6.40919	0	0
Papio_anubis_GRB2	77.634	7.05473	0	0
Papio_anubis_PPP3CA	77.5889	6.17006	0	0
Papio_anubis_APBB1IP	77.4627	6.58085	0	0
Papio_anubis_MITF	77.1963	8.86168	0	0
Papio_anubis_EIF4G3	77.1178	6.07528	0	0
Papio_anubis_BMP2K	76.9507	7.7671	0	0
Papio_anubis_KDM2A	76.8606	6.33101	0	0

## Sheet: NC
Gene	scores	log2FC	pvals	FDR
Sus_scrofa___CADPS2	41.0981	6.90774	0	0
Sus_scrofa___SCN7A	40.5828	10.231	0	0
Sus_scrofa___XKR4	39.5131	11.5721	0	0
Sus_scrofa___CHL1	39.3252	10.7157	0	0
Sus_scrofa___ZNF536	39.2809	7.63571	0	0
Sus_scrofa___GRIK3	38.5806	10.1176	0	0
Sus_scrofa___NRXN1	37.753	8.24896	0	0
Sus_scrofa___CDH19	37.3617	11.9152	1.63439e-305	1.09966e-301
Sus_scrofa___RBMS3	35.836	4.14994	3.04047e-281	1.8184e-277
Sus_scrofa___FRMD4A	35.6968	4.42476	4.42401e-279	2.38127e-275
Sus_scrofa___CNTN4	34.8061	8.09868	1.96631e-265	9.62171e-262
Sus_scrofa___ADAM23	34.5331	6.00294	2.55892e-261	1.1478e-257
Sus_scrofa___IL1RAPL2	34.0572	6.86072	3.17331e-254	1.3139e-250
Sus_scrofa___PLCB1	33.119	4.14932	1.58391e-240	6.08969e-237
Sus_scrofa___GRIK2	32.9723	8.87743	2.02589e-238	7.2697e-235
Sus_scrofa___AUTS2	32.7883	2.81152	8.63555e-236	2.90511e-232
Sus_scrofa___IQGAP2	32.6474	5.82151	8.72305e-234	2.76192e-230
Sus_scrofa___COL3A1	32.0978	5.01849	4.73443e-226	1.34124e-222
Sus_scrofa___UTRN	31.9723	2.32061	2.64399e-224	7.11577e-221
Sus_scrofa___MAML2	31.907	3.15922	2.13657e-223	5.47634e-220
Sus_scrofa___PDE1C	31.3242	4.52155	2.18739e-215	4.70954e-212
Sus_scrofa___ENSSSCG00000046579	30.7462	4.16727	1.37584e-207	2.46852e-204
Sus_scrofa___PLEKHG1	30.7029	4.35635	5.19859e-207	8.47937e-204
Sus_scrofa___DOCK1	30.0371	2.27764	3.21953e-198	4.2267e-195
Sus_scrofa___PLCE1	30.0034	6.00744	8.84999e-198	1.10781e-194
Sus_scrofa___GRIA4	28.8655	6.76552	3.24195e-183	3.2315e-180
Sus_scrofa___NCAM2	28.8415	7.72937	6.48338e-183	6.34499e-180
Sus_scrofa___ZEB2	28.8012	3.09915	2.07371e-182	1.92448e-179
Sus_scrofa___AGAP1	28.3979	1.83806	2.14647e-177	1.86348e-174
Sus_scrofa___GPM6B	27.8626	5.21209	7.58445e-171	6.09315e-168
Sus_scrofa___INSC	27.5006	6.19853	1.72886e-166	1.27476e-163
Sus_scrofa___SNTB1	27.4012	4.49671	2.65269e-165	1.87874e-162
Sus_scrofa___SNCA	26.9462	9.04084	6.32702e-160	4.05426e-157
Sus_scrofa___PLXDC2	26.4239	3.17065	7.28178e-154	4.30713e-151
Sus_scrofa___SOX5	26.2405	3.38202	9.16905e-152	5.14097e-149
Sus_scrofa___ENSSSCG00000033643	25.7511	9.40009	3.12986e-146	1.53153e-143
Sus_scrofa___PAPPA	25.4996	5.17864	1.99178e-143	9.1632e-141
Sus_scrofa___DNER	24.9991	6.98404	6.25088e-138	2.64929e-135
Sus_scrofa___ENSSSCG00000049691	24.9816	2.59491	9.69673e-138	4.07763e-135
Sus_scrofa___PTPRJ	24.6567	3.69344	3.12124e-134	1.26319e-131
Sus_scrofa___CORO2B	24.5922	4.92583	1.53083e-133	6.10358e-131
Sus_scrofa___LRRTM4	24.4857	7.40642	2.09639e-132	8.17684e-130
Sus_scrofa___GAS7	24.2124	3.99726	1.64559e-129	6.02554e-127
Sus_scrofa___ARAP2	23.9029	6.16716	2.85728e-126	9.98674e-124
Sus_scrofa___DST	23.7976	1.40068	3.53382e-125	1.20387e-122
Sus_scrofa___IGSF11	23.4183	8.16119	2.78073e-121	9.07126e-119
Sus_scrofa___SLC35F1	23.3474	6.01143	1.46421e-120	4.74774e-118
Sus_scrofa___CADM2	23.3461	6.49238	1.5107e-120	4.86916e-118
Sus_scrofa___ITGA1	23.2984	3.73149	4.5979e-120	1.4558e-117
Sus_scrofa___RASGEF1C	23.2411	6.87152	1.7501e-119	5.47679e-117
Sus_scrofa___ENSSSCG00000009125	23.1567	1.74492	1.24425e-118	3.84903e-116
Sus_scrofa___ASAP2	22.7675	3.4123	9.62853e-115	2.89534e-112
Sus_scrofa___SEMA6D	22.2666	4.64609	7.79616e-110	2.20861e-107
Sus_scrofa___ENSSSCG00000015814	22.1019	3.78908	3.02765e-108	8.40032e-106
Sus_scrofa___DLC1	21.963	1.21396	6.50192e-107	1.76754e-104
Sus_scrofa___TGFBR2	21.9625	2.75899	6.5785e-107	1.77937e-104
Sus_scrofa___ARHGAP24	21.8613	1.74556	6.06765e-106	1.63299e-103
Sus_scrofa___PDE7B	21.7785	2.70104	3.71374e-105	9.89584e-103
Sus_scrofa___GLI3	21.6239	2.99424	1.07027e-103	2.79652e-101
Sus_scrofa___PTPN13	21.5055	3.63805	1.38231e-102	3.50963e-100
Sus_scrofa___PCDH9	21.485	5.02007	2.15135e-102	5.43654e-100
Sus_scrofa___MATN2	21.4793	5.15871	2.43399e-102	6.12206e-100
Sus_scrofa___ARHGAP31	21.3707	3.09776	2.50285e-101	6.20823e-99
Sus_scrofa___ZSWIM6	21.1055	2.27059	7.07854e-99	1.68588e-96
Sus_scrofa___CADM1	20.8747	2.86207	9.08515e-97	2.12616e-94
Sus_scrofa___PTPRT	20.8699	5.64263	1.00637e-96	2.34498e-94
Sus_scrofa___TMEM178B	20.8326	4.52048	2.19245e-96	5.06484e-94
Sus_scrofa___TMTC2	20.7648	2.37848	9.01782e-96	2.05675e-93
Sus_scrofa___KIRREL1	20.7512	3.57264	1.19522e-95	2.70312e-93
Sus_scrofa___CDK14	20.4803	1.28976	3.22925e-93	6.89752e-91
Sus_scrofa___ZEB1	20.2885	1.59833	1.62627e-91	3.36675e-89
Sus_scrofa___ANKRD44	20.1714	3.22455	1.74539e-90	3.54519e-88
Sus_scrofa___SH3D19	20.1511	3.13823	2.63368e-90	5.30939e-88
Sus_scrofa___CPXM2	19.7082	5.15023	1.83202e-86	3.49683e-84
Sus_scrofa___EPB41L2	19.5879	2.88257	1.96122e-85	3.7302e-83
Sus_scrofa___MYOF	19.5093	4.78024	9.14542e-85	1.72119e-82
Sus_scrofa___LRMDA	19.4144	2.55789	5.83277e-84	1.09392e-81
Sus_scrofa___CYP7B1	19.0935	3.97809	2.85724e-81	5.19575e-79
Sus_scrofa___P3H2	18.9673	3.86334	3.17923e-80	5.72326e-78
Sus_scrofa___ARHGEF26	18.8641	3.48969	2.2496e-79	3.99627e-77
Sus_scrofa___GSN	18.7016	2.95755	4.80414e-78	8.23528e-76
Sus_scrofa___ANTXR2	18.5878	2.20952	4.03119e-77	6.78071e-75
Sus_scrofa___RBMS1	18.5508	1.64584	8.03801e-77	1.33949e-74
Sus_scrofa___PICK1	18.453	4.79673	4.93394e-76	8.19674e-74
Sus_scrofa___OPHN1	18.3631	2.10429	2.59161e-75	4.24e-73
Sus_scrofa___ENSSSCG00000015645	18.2873	2.42543	1.04492e-74	1.68395e-72
Sus_scrofa___KCNMB4	18.039	7.94923	9.61867e-73	1.52724e-70
Sus_scrofa___AKT3	17.9426	2.5511	5.48274e-72	8.62906e-70
Sus_scrofa___SORCS2	17.7452	5.60506	1.87749e-70	2.87096e-68
Sus_scrofa___CNTN3	17.5393	4.49707	7.1815e-69	1.08278e-66
Sus_scrofa___PIP4K2A	17.519	2.72508	1.0254e-68	1.53742e-66
Sus_scrofa___ACAP2	17.465	1.91915	2.64695e-68	3.95763e-66
Sus_scrofa___GFRA1	17.4417	5.87164	3.97757e-68	5.91428e-66
Sus_scrofa___SLIT2	17.4259	3.23968	5.251e-68	7.76484e-66
Sus_scrofa___DIP2B	17.2659	1.62195	8.49124e-67	1.22863e-64
Sus_scrofa___TCF4	17.2054	1.59629	2.42044e-66	3.48349e-64
Sus_scrofa___GALNT18	17.1728	3.50921	4.24684e-66	6.04736e-64
Sus_scrofa___LIN7A	17.0418	4.56398	4.01858e-65	5.64762e-63
Sus_scrofa___DLG2	16.6948	3.24687	1.43002e-62	1.95361e-60
Sus_scrofa___MEGF9	16.6691	4.94315	2.19734e-62	2.99428e-60

## Sheet: Res_Immune
Gene	scores	log2FC	pvals	FDR
Sus_scrofa___VAV3	72.3911	6.18067	0	0
Sus_scrofa___CD163	72.1687	11.0075	0	0
Sus_scrofa___RUNX1	71.6651	5.96055	0	0
Sus_scrofa___ZEB2	70.983	4.17176	0	0
Sus_scrofa___FKBP5	69.748	2.96999	0	0
Sus_scrofa___RBPJ	67.1923	5.13793	0	0
Sus_scrofa___IQGAP2	65.2715	6.55076	0	0
Sus_scrofa___UBASH3B	64.1128	7.0196	0	0
Sus_scrofa___MRC1	63.7919	8.07072	0	0
Sus_scrofa___FLI1	62.7387	4.68297	0	0
Sus_scrofa___DOCK10	62.132	6.31871	0	0
Sus_scrofa___ENSSSCG00000015645	61.9827	3.92988	0	0
Sus_scrofa___DAB2	60.4135	5.36126	0	0
Sus_scrofa___PRKCB	60.0987	7.15967	0	0
Sus_scrofa___LRMDA	59.7285	3.90522	0	0
Sus_scrofa___PTPRC	59.2481	6.73223	0	0
Sus_scrofa___PREX1	57.9211	6.43075	0	0
Sus_scrofa___PTPRJ	57.761	4.49045	0	0
Sus_scrofa___DOCK4	57.5534	3.55545	0	0
Sus_scrofa___MTSS1	57.3919	3.4644	0	0
Sus_scrofa___PIP4K2A	57.0789	3.92491	0	0
Sus_scrofa___MARCHF1	56.4818	6.93857	0	0
Sus_scrofa___RGL1	56.4322	4.48827	0	0
Sus_scrofa___INPP5D	56.1067	6.49825	0	0
Sus_scrofa___DOCK2	55.5841	9.24431	0	0
Sus_scrofa___TUT7	55.0612	3.7799	0	0
Sus_scrofa___GAS7	55.006	4.87093	0	0
Sus_scrofa___RBM47	54.1519	7.27548	0	0
Sus_scrofa___SLC9A9	53.9694	4.24488	0	0
Sus_scrofa___TRPS1	53.3306	3.60965	0	0
Sus_scrofa___SAT1	53.0976	3.68992	0	0
Sus_scrofa___FRMD4B	53.0653	3.1388	0	0
Sus_scrofa___F13A1	52.7352	10.2954	0	0
Sus_scrofa___ARHGAP22	52.3487	7.04936	0	0
Sus_scrofa___DOCK8	52.1133	7.52008	0	0
Sus_scrofa___GNAQ	50.9666	2.96724	0	0
Sus_scrofa___TCF12	50.7795	1.4609	0	0
Sus_scrofa___APBB1IP	49.7599	7.52027	0	0
Sus_scrofa___BANK1	49.3308	7.67613	0	0
Sus_scrofa___ARHGAP15	49.1607	6.98622	0	0
Sus_scrofa___COLEC12	49.1326	4.84985	0	0
Sus_scrofa___HPCAL1	49.0621	4.5428	0	0
Sus_scrofa___ANKRD44	47.6584	3.90441	0	0
Sus_scrofa___TNS3	47.3449	4.85228	0	0
Sus_scrofa___LRRC8D	46.8449	5.40106	0	0
Sus_scrofa___DISC1	46.7355	3.56439	0	0
Sus_scrofa___CMIP	46.6191	3.45744	0	0
Sus_scrofa___ARHGAP24	46.0748	2.12011	0	0
Sus_scrofa___FNBP1	45.9201	3.93246	0	0
Sus_scrofa___CSF1R	45.8831	7.71403	0	0
Sus_scrofa___MERTK	45.0358	5.59354	0	0
Sus_scrofa___ABR	44.8816	3.91671	0	0
Sus_scrofa___ASAP1	44.8614	2.25371	0	0
Sus_scrofa___ANKRD11	44.5715	2.35919	0	0
Sus_scrofa___STAB1	44.5644	7.07384	0	0
Sus_scrofa___AGAP1	44.5588	1.67844	0	0
Sus_scrofa___AFF1	44.4924	2.43136	0	0
Sus_scrofa___ATP2B1	44.487	3.55129	0	0
Sus_scrofa___MGAT4A	44.2632	3.6819	0	0
Sus_scrofa___LCP2	43.9579	10.1743	0	0
Sus_scrofa___TNFAIP8	43.691	5.56895	0	0
Sus_scrofa___ZNF710	42.8271	3.98969	0	0
Sus_scrofa___FCHO2	42.3287	2.81982	0	0
Sus_scrofa___ITGAM	42.2042	6.36058	0	0
Sus_scrofa___NRP1	42.1775	2.28212	0	0
Sus_scrofa___BCAT1	41.6226	6.48402	0	0
Sus_scrofa___LCP1	41.204	7.56371	0	0
Sus_scrofa___ARRB1	41.1617	5.02146	0	0
Sus_scrofa___CLCN5	40.7089	4.10935	0	0
Sus_scrofa___ZSWIM6	40.3982	2.26466	0	0
Sus_scrofa___ITSN1	40.1197	2.60373	0	0
Sus_scrofa___WDFY3	39.9667	1.98882	0	0
Sus_scrofa___DPYD	39.8874	2.08565	0	0
Sus_scrofa___IRAK2	39.6849	5.35141	0	0
Sus_scrofa___COX1	39.6391	2.90668	0	0
Sus_scrofa___ARHGAP6	39.627	4.00507	0	0
Sus_scrofa___PDE7B	39.4473	2.94938	0	0
Sus_scrofa___FOXP1	39.3149	1.2781	0	0
Sus_scrofa___SMURF1	39.2859	2.98146	0	0
Sus_scrofa___TBC1D1	39.1527	2.56006	0	0
Sus_scrofa___ELF1	39.1104	2.42027	0	0
Sus_scrofa___SLC11A1	38.8164	10.0303	0	0
Sus_scrofa___PSD3	38.7639	2.55084	0	0
Sus_scrofa___ENSSSCG00000005518	38.5719	2.81233	0	0
Sus_scrofa___ENSSSCG00000031640	38.1372	9.72768	0	0
Sus_scrofa___GRB2	38.0298	3.26177	0	0
Sus_scrofa___SKAP2	37.8301	5.45805	0	0
Sus_scrofa___MCTP1	37.7785	5.92612	0	0
Sus_scrofa___WWOX	37.6155	1.8663	0	1.33069e-307
Sus_scrofa___ENSSSCG00000005959	37.4966	2.84385	1.04536e-307	1.15067e-305
Sus_scrofa___PLXNC1	37.4495	5.2546	6.11555e-307	6.71787e-305
Sus_scrofa___ARHGAP25	37.3915	6.68968	5.36941e-306	5.87427e-304
Sus_scrofa___PPP3CA	37.239	2.36022	1.59693e-303	1.74001e-301
Sus_scrofa___DIP2B	37.2206	1.84789	3.17287e-303	3.4432e-301
Sus_scrofa___EPS15	37.1869	2.438	1.11202e-302	1.20433e-300
Sus_scrofa___ENSSSCG00000001229	36.9773	3.07691	2.65094e-299	2.82553e-297
Sus_scrofa___BLNK	36.9658	8.01384	4.05305e-299	4.31146e-297
Sus_scrofa___SYK	36.7018	8.23824	6.84221e-295	7.15123e-293
Sus_scrofa___EPB41L2	36.5992	2.96604	2.94352e-293	3.06456e-291
Sus_scrofa___ENSSSCG00000016263	36.5146	3.87237	6.50563e-292	6.76008e-290

[truncated: 1 more sheets: Vasc_EC]
