# Supplementary material for: Integrated Molecular Profiling of Preclinical and Clinical Cardiac Xenotransplants
Source: Research Square preprint supplement (doi:10.21203/rs.3.rs-8406985/v1), 2026-02-04
Supplement: Supplementary file 43 [file e5eafc61d7bee80b2752a068.xlsx]

## Sheet: CM
Gene	logFC	logCPM	F	PValue	FDR	Observations_PCMV	Observations_Standard	level
Sus_scrofa___ISG20	6.74143	1.01427	97.7052	4.37481e-12	1.40799e-07	3	7	Up-regulated
Sus_scrofa___ZBP1	6.08971	-0.00510722	72.5435	1.21667e-10	1.92456e-06	3	7	Up-regulated
Sus_scrofa___FOXS1	7.91791	4.64159	86.357	1.79396e-10	1.92456e-06	3	7	Up-regulated
Sus_scrofa___HLA-DOB	5.41915	0.369224	70.4207	4.16026e-10	3.00836e-06	3	7	Up-regulated
Sus_scrofa___MX2	8.42168	5.80668	80.5095	4.67368e-10	3.00836e-06	3	7	Up-regulated
Sus_scrofa___TEP1	2.00802	4.68232	87.4563	9.4267e-10	5.05648e-06	3	7	Up-regulated
Sus_scrofa___PARP3	2.3851	4.55802	85.1532	1.23127e-09	5.66105e-06	3	7	Up-regulated
Sus_scrofa___ETV7	5.53961	1.22924	73.1562	1.63628e-09	6.09097e-06	3	7	Up-regulated
Sus_scrofa___SETX	2.77069	6.19795	82.4128	1.70329e-09	6.09097e-06	3	7	Up-regulated
Sus_scrofa___LGALS1	5.67532	1.27036	75.9764	2.19953e-09	6.49875e-06	3	7	Up-regulated
Sus_scrofa___ENSSSCG00000014672	4.53477	1.12945	64.9257	2.22117e-09	6.49875e-06	3	7	Up-regulated
Sus_scrofa___ANO6	5.65971	5.92494	79.1106	2.55768e-09	6.85971e-06	3	7	Up-regulated
Sus_scrofa___HTATIP2	1.98584	3.73193	78.2589	2.83688e-09	7.02324e-06	3	7	Up-regulated
Sus_scrofa___UBE2L6	6.2756	2.86638	70.5591	4.96634e-09	1.14169e-05	3	7	Up-regulated
Sus_scrofa___ENSSSCG00000031163	4.94536	0.0243506	52.1137	9.55772e-09	1.93447e-05	3	7	Up-regulated
Sus_scrofa___CCDC194	4.3065	0.522457	65.7526	9.94393e-09	1.93447e-05	3	7	Up-regulated
Sus_scrofa___GK5	2.30758	4.8624	68.4969	1.02181e-08	1.93447e-05	3	7	Up-regulated
Sus_scrofa___SHFL	5.46541	-0.33178	50.4324	1.23439e-08	2.20709e-05	3	7	Up-regulated
Sus_scrofa___ENSSSCG00000016263	4.79955	3.00123	64.3303	1.48681e-08	2.5185e-05	3	7	Up-regulated
Sus_scrofa___HERC5	5.69737	5.91744	65.329	1.60744e-08	2.58669e-05	3	7	Up-regulated
Sus_scrofa___MOSPD1	1.70891	5.40166	63.7244	2.01033e-08	2.96912e-05	3	7	Up-regulated
Sus_scrofa___UCHL1	5.82239	-0.970768	52.9223	2.0296e-08	2.96912e-05	3	7	Up-regulated
Sus_scrofa___S100A6	4.25335	-0.563086	47.6813	2.25184e-08	3.15101e-05	3	7	Up-regulated
Sus_scrofa___BST2	7.5511	3.43562	68.8386	2.59667e-08	3.48213e-05	3	7	Up-regulated
Sus_scrofa___ENSSSCG00000008898	3.86784	0.687329	53.5524	3.16609e-08	3.91913e-05	3	7	Up-regulated
Sus_scrofa___EDN1	5.85837	1.07401	48.8221	3.49577e-08	4.16696e-05	3	7	Up-regulated
Sus_scrofa___ENSSSCG00000032436	6.9801	1.9728	48.7472	4.1821e-08	4.80703e-05	3	7	Up-regulated
Sus_scrofa___C20orf96	3.02013	1.62617	58.5624	4.54452e-08	5.04347e-05	3	7	Up-regulated
Sus_scrofa___DNAJB9	2.16211	4.01035	57.8019	4.91584e-08	5.27371e-05	3	7	Up-regulated
Sus_scrofa___SCNN1A	3.01113	1.81862	57.4509	5.32483e-08	5.52821e-05	3	7	Up-regulated
Sus_scrofa___TRIM22	4.9202	0.439155	46.703	6.22201e-08	6.05328e-05	3	7	Up-regulated
Sus_scrofa___LAT2	2.20276	2.50255	56.0665	6.50076e-08	6.05328e-05	3	7	Up-regulated
Sus_scrofa___ENSSSCG00000028691	3.15869	2.51211	56.009	6.63838e-08	6.05328e-05	3	7	Up-regulated
Sus_scrofa___ENSSSCG00000011559	1.43108	4.75316	55.5427	7.02645e-08	6.05328e-05	3	7	Up-regulated
Sus_scrofa___C1orf115	3.13963	1.6911	54.6691	7.1392e-08	6.05328e-05	3	7	Up-regulated
Sus_scrofa___PIR	2.3402	3.42789	55.4532	7.14718e-08	6.05328e-05	3	7	Up-regulated
Sus_scrofa___S100Z	5.1187	-1.83839	42.3449	1.00032e-07	8.25493e-05	3	7	Up-regulated
Sus_scrofa___AFF2	3.53211	3.05415	53.2213	1.03432e-07	8.32211e-05	3	7	Up-regulated
Sus_scrofa___H1-3	3.82397	3.38914	52.2218	1.22035e-07	9.57949e-05	3	7	Up-regulated
Sus_scrofa___OAS2	5.20109	6.74298	51.1976	1.44147e-07	0.000108861	3	7	Up-regulated
Sus_scrofa___MX1	6.53174	6.02529	51.1146	1.45446e-07	0.000108861	3	7	Up-regulated
Sus_scrofa___TRAF3IP2	1.58909	6.62584	50.8973	1.516e-07	0.000110889	3	7	Up-regulated
Sus_scrofa___IFIT2	5.37751	4.65764	50.8709	1.55671e-07	0.000111207	3	7	Up-regulated
Sus_scrofa___NMI	5.04422	1.10548	48.673	1.58946e-07	0.000111207	3	7	Up-regulated
Sus_scrofa___FBXO39	2.41288	6.76837	49.7569	1.84449e-07	0.000126305	3	7	Up-regulated
Sus_scrofa___IFIT1	5.50176	5.95629	48.9585	2.15686e-07	0.000138829	3	7	Up-regulated
Sus_scrofa___MTPN	1.92029	7.06487	48.7484	2.19943e-07	0.000138829	3	7	Up-regulated
Sus_scrofa___MLLT11	2.29908	3.97829	48.7514	2.19994e-07	0.000138829	3	7	Up-regulated
Sus_scrofa___IFI35	3.22549	-0.319186	41.9071	2.29445e-07	0.000139344	3	7	Up-regulated
Sus_scrofa___ENSSSCG00000051689	3.12096	0.327102	48.2092	2.29469e-07	0.000139344	3	7	Up-regulated
Sus_scrofa___ENSSSCG00000036669	2.03269	6.87574	48.2369	2.40705e-07	0.00014346	3	7	Up-regulated
Sus_scrofa___H2BC21	2.89228	2.79699	47.3278	2.84215e-07	0.000160477	3	7	Up-regulated
Sus_scrofa___ENSSSCG00000045769	4.45021	3.28323	46.6918	3.21288e-07	0.000175694	3	7	Up-regulated
Sus_scrofa___ENSSSCG00000001398	4.09222	1.18662	42.3787	3.22085e-07	0.000175694	3	7	Up-regulated
Sus_scrofa___GSR	2.30148	5.60501	46.4102	3.33995e-07	0.000179155	3	7	Up-regulated
Sus_scrofa___XPO6	1.26919	6.30748	46.0208	3.58502e-07	0.000189148	3	7	Up-regulated
Sus_scrofa___MOB3B	2.24749	4.62583	45.0058	4.33233e-07	0.00022489	3	7	Up-regulated
Sus_scrofa___ENSSSCG00000025593	5.10907	1.44606	41.1711	4.49663e-07	0.000229714	3	7	Up-regulated
Sus_scrofa___GM2A	2.97195	2.28057	44.7266	4.59729e-07	0.000231186	3	7	Up-regulated
Sus_scrofa___HES4	4.51069	0.618332	40.5716	4.8675e-07	0.000241009	3	7	Up-regulated
Papio_anubis_CDC14A	4.546	-0.504535	37.8327	5.05576e-07	0.000246537	3	7	Up-regulated
Sus_scrofa___RSAD2	7.44436	6.15858	47.7915	5.16058e-07	0.000247893	3	7	Up-regulated
Sus_scrofa___ENSSSCG00000017754	3.35642	3.61333	43.6356	5.60622e-07	0.000261494	3	7	Up-regulated
Sus_scrofa___LIMK1	1.73586	3.62262	43.5058	5.72851e-07	0.000263381	3	7	Up-regulated
Sus_scrofa___DDHD1	1.39197	6.294	43.4001	5.83883e-07	0.000264672	3	7	Up-regulated
Sus_scrofa___H1-0	2.48964	2.86499	43.1625	6.1281e-07	0.000270567	3	7	Up-regulated
Sus_scrofa___ARMC12	2.40425	2.59433	43.1899	6.13702e-07	0.000270567	3	7	Up-regulated
Sus_scrofa___GHSR	4.43235	2.74522	42.8003	6.74903e-07	0.000293528	3	7	Up-regulated
Sus_scrofa___GRINA	2.89111	-0.373399	41.0909	6.97421e-07	0.000299277	3	7	Up-regulated
Sus_scrofa___SH3RF2	2.97014	4.70728	42.1994	7.35113e-07	0.000311301	3	7	Up-regulated
Sus_scrofa___RNF19B	2.25498	5.00945	41.9207	7.75705e-07	0.00031575	3	7	Up-regulated
Sus_scrofa___FAM171B	2.37303	3.43	41.9215	7.78371e-07	0.00031575	3	7	Up-regulated
Sus_scrofa___PRXL2A	3.57622	-1.31552	35.0394	7.85451e-07	0.00031575	3	7	Up-regulated
Sus_scrofa___TRIM38	3.50284	-1.47047	33.4984	7.91178e-07	0.00031575	3	7	Up-regulated
Sus_scrofa___TRIM56	3.12275	2.18704	41.8568	7.94674e-07	0.00031575	3	7	Up-regulated
Sus_scrofa___H2AC6	3.86625	2.9711	41.6561	8.22893e-07	0.000322975	3	7	Up-regulated
Papio_anubis_USP34	4.53553	-0.73512	36.6864	8.7949e-07	0.00034103	3	7	Up-regulated
Sus_scrofa___HLCS	1.39397	5.95514	41.0904	9.12039e-07	0.000349441	3	7	Up-regulated
Sus_scrofa___MYORG	1.47328	6.06388	41.0051	9.27467e-07	0.000351172	3	7	Up-regulated
Sus_scrofa___ZMAT3	2.27083	3.57908	40.7128	9.83383e-07	0.000368014	3	7	Up-regulated
Sus_scrofa___ENSSSCG00000039582	1.73194	5.22739	40.4058	1.04419e-06	0.000386277	3	7	Up-regulated
Sus_scrofa___CMPK2	6.13086	4.20202	39.8625	1.2406e-06	0.000453723	3	7	Up-regulated
Sus_scrofa___ZNFX1	2.69713	5.66063	39.3623	1.28694e-06	0.000465382	3	7	Up-regulated
Sus_scrofa___TSPAN5	4.39338	3.68135	39.2323	1.32862e-06	0.000475115	3	7	Up-regulated
Papio_anubis_XPO1	3.89637	-0.963087	37.322	1.36349e-06	0.000482226	3	7	Up-regulated
Sus_scrofa___PARP14	4.96585	3.9738	38.6833	1.43353e-06	0.000501487	3	7	Up-regulated
Sus_scrofa___ENO1	1.51759	7.13252	38.5711	1.51119e-06	0.000522968	3	7	Up-regulated
Sus_scrofa___DHDH	1.40218	3.63871	38.3774	1.57328e-06	0.000538665	3	7	Up-regulated
Sus_scrofa___IGF2BP2	1.67975	6.83869	38.315	1.59262e-06	0.000539546	3	7	Up-regulated
Sus_scrofa___CMAS	1.80188	4.25679	38.0171	1.69383e-06	0.000566439	3	7	Up-regulated
Sus_scrofa___TSKU	2.50372	-0.708569	36.6766	1.76316e-06	0.000570761	3	7	Up-regulated
Sus_scrofa___MTX3	1.40771	3.94548	37.7781	1.77981e-06	0.000570761	3	7	Up-regulated
Sus_scrofa___AKAP7	2.22715	6.10728	37.7455	1.79116e-06	0.000570761	3	7	Up-regulated
Sus_scrofa___INSIG1	2.78228	1.44493	37.2721	2.01314e-06	0.000629038	3	7	Up-regulated
Papio_anubis_ARID1B	3.57332	-0.128555	36.1266	2.04309e-06	0.000632259	3	7	Up-regulated
Sus_scrofa___ERAP1	1.68244	3.24375	37.0474	2.07438e-06	0.000635827	3	7	Up-regulated
Sus_scrofa___WDR54	2.93843	-0.64782	34.0226	2.12193e-06	0.000638994	3	7	Up-regulated
Sus_scrofa___OSGIN1	1.84712	4.41832	36.808	2.17902e-06	0.000638994	3	7	Up-regulated
Sus_scrofa___UBA7	4.39876	-0.442891	33.519	2.18398e-06	0.000638994	3	7	Up-regulated
Sus_scrofa___MMP25	3.69064	2.48664	36.6225	2.22855e-06	0.000641542	3	7	Up-regulated
Sus_scrofa___SCARB2	1.38365	6.08326	36.6901	2.23335e-06	0.000641542	3	7	Up-regulated
Papio_anubis_PTP4A2	3.97932	-2.0854	32.0015	2.25275e-06	0.000641542	3	7	Up-regulated
Sus_scrofa___CDIN1	1.04777	7.24	36.5555	2.29769e-06	0.000641542	3	7	Up-regulated
Sus_scrofa___IFIT5	3.1224	4.34854	36.5517	2.30115e-06	0.000641542	3	7	Up-regulated
Sus_scrofa___VPS37C	1.25094	4.21643	36.5086	2.32119e-06	0.000641542	3	7	Up-regulated
Sus_scrofa___SLC37A2	2.24434	1.92695	36.5116	2.34351e-06	0.000641542	3	7	Up-regulated
Papio_anubis_TTC3	4.30215	-1.69223	30.7973	2.35216e-06	0.000641542	3	7	Up-regulated
Sus_scrofa___ENSSSCG00000001229	4.989	4.97959	35.9423	2.50375e-06	0.00067715	3	7	Up-regulated
Sus_scrofa___TERF2IP	1.10974	5.09934	36.0115	2.57925e-06	0.000691756	3	7	Up-regulated
Sus_scrofa___CDC14A	1.94019	7.60487	35.9365	2.62065e-06	0.000697051	3	7	Up-regulated
Sus_scrofa___LRP2	2.41515	4.01431	35.7084	2.75314e-06	0.000726286	3	7	Up-regulated
Sus_scrofa___MSN	2.12888	4.44639	35.6158	2.80792e-06	0.000734717	3	7	Up-regulated
Sus_scrofa___PLEKHA4	3.08005	4.03372	35.4058	2.94165e-06	0.000758012	3	7	Up-regulated
Sus_scrofa___APOBEC3B	2.79946	2.56151	35.4164	2.94406e-06	0.000758012	3	7	Up-regulated
Sus_scrofa___VPS26C	1.17642	5.93787	35.3015	3.00354e-06	0.000763838	3	7	Up-regulated
Papio_anubis_RBM25	3.54893	-1.57944	30.7741	3.01415e-06	0.000763838	3	7	Up-regulated
Sus_scrofa___S100A11	4.02485	0.462704	33.3347	3.07538e-06	0.000773266	3	7	Up-regulated
Sus_scrofa___ASAP1	1.04371	7.77178	35.0174	3.19399e-06	0.000796862	3	7	Up-regulated
Sus_scrofa___PLAAT3	1.48808	5.29878	34.9691	3.22779e-06	0.000799102	3	7	Up-regulated
Sus_scrofa___NPC2	2.29552	1.50409	34.9183	3.31207e-06	0.000813708	3	7	Up-regulated
Sus_scrofa___CHMP4B	1.38176	6.46444	34.7866	3.35828e-06	0.000818811	3	7	Up-regulated
Papio_anubis_RALGAPA1	3.87629	-1.67579	29.2654	3.45303e-06	0.000835581	3	7	Up-regulated
Sus_scrofa___B2M	2.49646	6.41217	34.5937	3.50271e-06	0.000841279	3	7	Up-regulated
Sus_scrofa___ENSSSCG00000034610	3.18781	4.06818	34.4384	3.62587e-06	0.000864408	3	7	Up-regulated
Sus_scrofa___ABCG2	1.92685	4.55181	34.0941	3.90931e-06	0.000918375	3	7	Up-regulated
Sus_scrofa___FAM155B	2.92372	0.814521	34.1852	3.95008e-06	0.000921227	3	7	Up-regulated
Sus_scrofa___PLSCR1	2.37164	4.38592	33.9989	3.99305e-06	0.00092409	3	7	Up-regulated
Sus_scrofa___CCDC180	2.19682	5.73641	33.9672	4.01978e-06	0.00092409	3	7	Up-regulated
Sus_scrofa___UBD	4.85687	0.249054	28.6657	4.13433e-06	0.00094062	3	7	Up-regulated
Sus_scrofa___MAP1A	3.22223	1.10495	33.7723	4.15014e-06	0.00094062	3	7	Up-regulated
Sus_scrofa___TRANK1	2.95291	5.50709	33.5344	4.42502e-06	0.000988992	3	7	Up-regulated
Sus_scrofa___CCL5	4.61009	3.33064	33.4638	4.57067e-06	0.00100755	3	7	Up-regulated
Sus_scrofa___CNN3	3.13982	1.69682	30.7109	4.75697e-06	0.00104149	3	7	Up-regulated
Sus_scrofa___SNX21	1.7519	4.12637	32.8936	5.1086e-06	0.00110814	3	7	Up-regulated
Papio_anubis_RABEP1	4.12323	-1.83589	28.9008	5.13887e-06	0.00110814	3	7	Up-regulated
Sus_scrofa___STX11	2.00576	3.04165	32.8535	5.16471e-06	0.00110814	3	7	Up-regulated
Sus_scrofa___H3-5	3.14147	6.89375	32.7615	5.26141e-06	0.00112141	3	7	Up-regulated
Sus_scrofa___DENND5B	0.963868	10.0136	32.6871	5.35047e-06	0.00113289	3	7	Up-regulated
Sus_scrofa___H2AW	3.58498	-2.05169	27.7763	5.55915e-06	0.00115429	3	7	Up-regulated
Sus_scrofa___TMEM238	4.29455	-1.90497	27.2703	5.6343e-06	0.0011624	3	7	Up-regulated
Sus_scrofa___NEMP2	1.54706	4.5656	32.3857	5.72955e-06	0.00117452	3	7	Up-regulated
Sus_scrofa___ENSSSCG00000035669	3.30979	1.30717	29.6546	6.30429e-06	0.00127608	3	7	Up-regulated
Sus_scrofa___SLC10A7	1.11991	6.67261	31.8161	6.52441e-06	0.00131239	3	7	Up-regulated
Sus_scrofa___GDAP2	1.23495	5.85227	31.695	6.70868e-06	0.00134005	3	7	Up-regulated
Papio_anubis_PICALM	4.16585	-2.12016	31.7898	6.74524e-06	0.00134005	3	7	Up-regulated
Sus_scrofa___ZDHHC14	3.3885	5.09973	31.5294	6.97487e-06	0.00137717	3	7	Up-regulated
Sus_scrofa___RIMKLA	2.03777	0.465705	31.6449	7.02486e-06	0.00137859	3	7	Up-regulated
Sus_scrofa___EPN3	2.34553	-0.916422	29.9929	7.3534e-06	0.00141238	3	7	Up-regulated
Sus_scrofa___HPCAL1	1.61277	4.38637	31.2722	7.39825e-06	0.00141238	3	7	Up-regulated
Sus_scrofa___MDM2	1.39826	6.25955	31.2608	7.41646e-06	0.00141238	3	7	Up-regulated
Sus_scrofa___RGS1	3.71022	-1.59205	26.1141	7.49456e-06	0.00141423	3	7	Up-regulated
Sus_scrofa___PEA15	1.22722	3.99967	31.2058	7.51407e-06	0.00141423	3	7	Up-regulated
Sus_scrofa___YBX2	2.46766	1.09637	31.263	7.61444e-06	0.00142479	3	7	Up-regulated
Sus_scrofa___SREBF2	1.3157	5.26934	30.9851	7.90762e-06	0.00147109	3	7	Up-regulated
Sus_scrofa___XKR9	2.6579	2.53353	30.9543	8.00673e-06	0.00148097	3	7	Up-regulated
Sus_scrofa___AGPAT4	1.61184	3.52312	30.7548	8.34922e-06	0.00152388	3	7	Up-regulated
Papio_anubis_ATRX	3.79904	-1.61617	26.6108	8.3657e-06	0.00152388	3	7	Up-regulated
Sus_scrofa___ENSSSCG00000037142	3.77102	-0.767247	28.2073	8.38077e-06	0.00152388	3	7	Up-regulated
Sus_scrofa___ENSSSCG00000005453	2.36983	3.26882	30.6316	8.60093e-06	0.00155513	3	7	Up-regulated
Sus_scrofa___MSMO1	2.00276	2.28727	30.4308	9.03575e-06	0.00161559	3	7	Up-regulated
Papio_anubis_CERT1	3.67444	-2.05576	27.2695	9.12176e-06	0.00162196	3	7	Up-regulated
Sus_scrofa___MAGI1	1.75903	8.7315	30.2842	9.32051e-06	0.00164819	3	7	Up-regulated
Sus_scrofa___F2	2.49495	2.20441	30.1799	9.63018e-06	0.00169365	3	7	Up-regulated
Sus_scrofa___MOV10	2.82219	3.72888	30.0879	9.77227e-06	0.00170544	3	7	Up-regulated
Sus_scrofa___PSMA6	0.959693	6.16457	30.0709	9.8032e-06	0.00170544	3	7	Up-regulated
Sus_scrofa___SPSB1	2.54813	4.4503	29.8896	1.0237e-05	0.00177133	3	7	Up-regulated
Sus_scrofa___NTN1	2.54922	2.26353	29.752	1.06284e-05	0.00181595	3	7	Up-regulated
Sus_scrofa___PRRG3	2.70774	-0.460733	28.9466	1.07206e-05	0.00181595	3	7	Up-regulated
Sus_scrofa___EIF4EBP1	1.63716	3.72129	29.6505	1.08411e-05	0.00182631	3	7	Up-regulated
Sus_scrofa___TLL2	2.17926	4.04322	29.6296	1.08952e-05	0.00182631	3	7	Up-regulated
Sus_scrofa___UVRAG	1.08468	8.51682	29.4607	1.13385e-05	0.00188103	3	7	Up-regulated
Papio_anubis_BIRC6	4.77568	-1.27932	28.7223	1.16169e-05	0.00191733	3	7	Up-regulated
Sus_scrofa___ENSSSCG00000017146	3.34732	6.77395	29.2482	1.1933e-05	0.00194113	3	7	Up-regulated
Sus_scrofa___ISG15	5.26922	5.95182	27.7485	1.2418e-05	0.0019983	3	7	Up-regulated
Papio_anubis_CSNK1A1	3.72794	-1.08034	25.0044	1.26255e-05	0.00201392	3	7	Up-regulated
Sus_scrofa___CCL4	3.99162	1.28708	28.3032	1.27008e-05	0.00201392	3	7	Up-regulated
Papio_anubis_ARID4B	3.628	-0.473332	26.1976	1.27186e-05	0.00201392	3	7	Up-regulated
Sus_scrofa___NFATC2	1.72454	4.00091	28.9702	1.27653e-05	0.00201392	3	7	Up-regulated
Sus_scrofa___NDN	3.02751	-1.35169	25.7993	1.31473e-05	0.00206407	3	7	Up-regulated
Papio_anubis_WDR26	4.34892	-2.05743	27.4591	1.34127e-05	0.0020955	3	7	Up-regulated
Sus_scrofa___ENSSSCG00000031661	2.75059	4.09565	28.6871	1.36751e-05	0.00212618	3	7	Up-regulated
Sus_scrofa___SH3PXD2A	1.63215	6.76102	28.6122	1.39209e-05	0.00215399	3	7	Up-regulated
Sus_scrofa___JCHAIN	1.08765	4.87275	28.52	1.42389e-05	0.00219265	3	7	Up-regulated
Papio_anubis_XRN1	2.80268	-0.283646	27.0458	1.43506e-05	0.00219934	3	7	Up-regulated
Sus_scrofa___ALAD	1.53641	3.7434	28.4165	1.46087e-05	0.00222828	3	7	Up-regulated
Papio_anubis_U4-51	3.15991	-1.61525	24.618	1.48332e-05	0.00225185	3	7	Up-regulated
Sus_scrofa___F2RL1	2.81971	0.854261	28.4058	1.50102e-05	0.00225659	3	7	Up-regulated
Sus_scrofa___XKRX	2.01943	2.99979	28.2978	1.50539e-05	0.00225659	3	7	Up-regulated
Sus_scrofa___SSR3	1.31664	5.62816	28.2867	1.50748e-05	0.00225659	3	7	Up-regulated
Sus_scrofa___BATF2	3.73559	-0.21002	26.1954	1.51756e-05	0.00226117	3	7	Up-regulated
Sus_scrofa___SP110	3.7286	3.03958	28.2763	1.52751e-05	0.00226551	3	7	Up-regulated
Sus_scrofa___BAMBI	2.68672	-0.611385	27.1139	1.56046e-05	0.00230376	3	7	Up-regulated
Sus_scrofa___LGALS3BP	4.57832	2.25517	26.2033	1.57259e-05	0.00231106	3	7	Up-regulated
Sus_scrofa___NOL3	1.94761	2.53819	28.0774	1.59133e-05	0.00232797	3	7	Up-regulated
Sus_scrofa___MEGF9	1.23273	3.8201	28.0152	1.61206e-05	0.00234762	3	7	Up-regulated
Sus_scrofa___ENSSSCG00000042730	2.73619	-0.876581	25.9413	1.65699e-05	0.00240219	3	7	Up-regulated
Sus_scrofa___ZNF395	0.967573	6.65088	27.797	1.7009e-05	0.00244384	3	7	Up-regulated
Papio_anubis_DMXL1	6.26111	-2.1199	31.133	1.75444e-05	0.00250953	3	7	Up-regulated
Sus_scrofa___MOSPD2	1.14509	4.52916	27.6547	1.76222e-05	0.00250953	3	7	Up-regulated
Sus_scrofa___PARVA	0.985069	7.24888	27.5182	1.82286e-05	0.00256302	3	7	Up-regulated
Papio_anubis_U5-10	3.04387	-0.834229	25.353	1.84161e-05	0.00257698	3	7	Up-regulated
Sus_scrofa___AHR	1.31204	5.37373	27.3859	1.88411e-05	0.00261372	3	7	Up-regulated
Sus_scrofa___PLOD1	1.44345	4.59761	27.3236	1.91388e-05	0.00264362	3	7	Up-regulated
Sus_scrofa___ADM	3.11757	1.58961	26.7495	1.95052e-05	0.0026661	3	7	Up-regulated
Sus_scrofa___TFG	0.977853	5.6836	27.2381	1.95501e-05	0.0026661	3	7	Up-regulated
Sus_scrofa___ENSSSCG00000015823	2.03682	1.31271	27.0913	2.06927e-05	0.00279821	3	7	Up-regulated
Papio_anubis_SAMD4A	3.11539	-2.01681	25.2575	2.08556e-05	0.00280844	3	7	Up-regulated
Sus_scrofa___EZR	1.71317	6.55929	26.8467	2.15721e-05	0.00289281	3	7	Up-regulated
Sus_scrofa___ENSSSCG00000025631	1.50808	2.8783	26.7386	2.22004e-05	0.00294032	3	7	Up-regulated
Sus_scrofa___DNASE1L1	1.49347	2.67019	26.6577	2.26648e-05	0.00298952	3	7	Up-regulated
Sus_scrofa___PSMB8	4.86992	1.32287	26.6767	2.28611e-05	0.00300311	3	7	Up-regulated
Papio_anubis_PSMC3	5.18798	-2.43228	28.4537	2.32156e-05	0.00302498	3	7	Up-regulated
Papio_anubis_CCNT2	5.38878	-2.5184	33.119	2.35874e-05	0.00306104	3	7	Up-regulated
Sus_scrofa___LIG4	1.43825	1.71529	26.4536	2.39651e-05	0.00309756	3	7	Up-regulated
Papio_anubis_EIF4G3	4.41223	-1.91506	25.7482	2.49004e-05	0.00318802	3	7	Up-regulated
Sus_scrofa___ENSSSCG00000001396	2.38908	-0.613312	24.6242	2.49621e-05	0.00318802	3	7	Up-regulated
Papio_anubis_ENSPANG00000017987	5.15688	-1.97063	27.0599	2.56497e-05	0.00326289	3	7	Up-regulated
Sus_scrofa___ENSSSCG00000014280	1.51198	7.66164	26.0835	2.61948e-05	0.0033191	3	7	Up-regulated
Sus_scrofa___ENSSSCG00000042129	2.6429	-1.93667	22.2808	2.6736e-05	0.00337439	3	7	Up-regulated
Papio_anubis_CAPZA2	3.34445	-0.996509	24.2529	2.73766e-05	0.00342714	3	7	Up-regulated
Papio_anubis_PPP3CC	3.53075	-1.99706	22.733	2.75852e-05	0.00342714	3	7	Up-regulated
Sus_scrofa___ACCSL	0.981745	5.82654	25.87	2.76726e-05	0.00342714	3	7	Up-regulated
Sus_scrofa___ARRDC2	2.43457	2.60369	25.8892	2.76863e-05	0.00342714	3	7	Up-regulated
Sus_scrofa___C9orf40	1.55492	2.59864	25.8136	2.81221e-05	0.00345451	3	7	Up-regulated
Sus_scrofa___SOGA1	1.31402	4.23664	25.7681	2.84133e-05	0.00347701	3	7	Up-regulated
Papio_anubis_NF1	4.79432	-1.75038	25.7058	2.88151e-05	0.00351282	3	7	Up-regulated
Sus_scrofa___DUSP4	3.4121	1.92385	25.5399	2.93056e-05	0.00355914	3	7	Up-regulated
Sus_scrofa___EIF2AK3	0.869761	6.74997	25.5498	3.00597e-05	0.00360985	3	7	Up-regulated
Papio_anubis_MYL2	3.69989	-0.880055	23.4172	3.04242e-05	0.00364005	3	7	Up-regulated
Sus_scrofa___ENSSSCG00000006324	1.61101	3.34864	25.3026	3.20797e-05	0.00380979	3	7	Up-regulated
Sus_scrofa___SRXN1	3.0307	2.86956	25.2272	3.28607e-05	0.00387322	3	7	Up-regulated
Sus_scrofa___FJX1	2.82097	-0.353611	24.3965	3.29565e-05	0.00387322	3	7	Up-regulated
Sus_scrofa___CLMN	2.13952	2.84929	25.2015	3.29748e-05	0.00387322	3	7	Up-regulated
Sus_scrofa___ZNHIT2	3.10179	-1.49589	22.3346	3.47758e-05	0.00404052	3	7	Up-regulated
Sus_scrofa___IFFO2	1.9886	1.23192	25.0303	3.5043e-05	0.00405693	3	7	Up-regulated
Sus_scrofa___RSRC1	0.953109	6.93042	24.8796	3.58071e-05	0.00411577	3	7	Up-regulated
Sus_scrofa___LZTS1	1.65132	5.32439	24.8469	3.61177e-05	0.0041367	3	7	Up-regulated
Sus_scrofa___ABHD4	1.53093	6.13566	24.8225	3.63492e-05	0.00414845	3	7	Up-regulated
Sus_scrofa___ARL8A	1.23923	3.57699	24.7613	3.69548e-05	0.00415977	3	7	Up-regulated
Sus_scrofa___ENSSSCG00000033720	2.0456	1.96554	24.7953	3.69654e-05	0.00415977	3	7	Up-regulated
pCMV_____gp26	7.63525	-2.03212	36.7834	3.8481e-05	0.00430025	3	7	Up-regulated
Sus_scrofa___TMEM231	1.5237	2.60196	24.5911	3.8756e-05	0.004316	3	7	Up-regulated
Sus_scrofa___LIN54	0.979845	5.69973	24.5647	3.89089e-05	0.00431809	3	7	Up-regulated
Sus_scrofa___ENSSSCG00000005768	1.15835	4.8173	24.5377	3.91901e-05	0.00433434	3	7	Up-regulated
Sus_scrofa___G6PD	1.49047	2.18932	24.4885	3.98375e-05	0.0043815	3	7	Up-regulated
Sus_scrofa___TRIOBP	1.37319	4.1176	24.4716	3.98887e-05	0.0043815	3	7	Up-regulated
Papio_anubis_HP1BP3	2.99997	-1.57649	22.2223	4.08679e-05	0.00445862	3	7	Up-regulated
Sus_scrofa___ELF4	2.13844	0.916485	24.3894	4.1529e-05	0.00448847	3	7	Up-regulated
Sus_scrofa___ADCY9	1.02556	6.807	24.3123	4.16037e-05	0.00448847	3	7	Up-regulated
Sus_scrofa___ADAR	1.91682	5.4694	24.3004	4.17368e-05	0.00448847	3	7	Up-regulated
Papio_anubis_TPR	3.50511	-2.10119	22.0087	4.19783e-05	0.00448847	3	7	Up-regulated
Sus_scrofa___RHBDD1	1.22541	5.18264	24.1777	4.31245e-05	0.00458842	3	7	Up-regulated
Sus_scrofa___FAM43B	2.61909	-0.385247	23.7925	4.31983e-05	0.00458842	3	7	Up-regulated
Papio_anubis_TENT2	5.08121	-2.08413	27.0839	4.34789e-05	0.00460305	3	7	Up-regulated
Sus_scrofa___MGMT	1.60211	7.07962	24.0965	4.40682e-05	0.00465013	3	7	Up-regulated
Sus_scrofa___STX3	1.90769	1.6189	24.054	4.50627e-05	0.00470445	3	7	Up-regulated
Papio_anubis_MAP4K3	4.67242	-2.1563	26.7191	4.51859e-05	0.00470445	3	7	Up-regulated
Papio_anubis_MSL1	3.96881	-1.89035	22.0844	4.546e-05	0.00470445	3	7	Up-regulated
Sus_scrofa___MFRP	2.46505	0.633548	24.0653	4.57268e-05	0.00470946	3	7	Up-regulated
Sus_scrofa___SERGEF	1.44538	5.46497	23.95	4.58328e-05	0.00470946	3	7	Up-regulated
Sus_scrofa___DDX60	4.6417	5.9832	23.923	4.62671e-05	0.00470946	3	7	Up-regulated
Papio_anubis_NIPBL	3.02444	1.0932	23.905	4.62803e-05	0.00470946	3	7	Up-regulated
Sus_scrofa___ENSSSCG00000004578	2.349	4.44937	23.9062	4.63844e-05	0.00470946	3	7	Up-regulated
Sus_scrofa___CAMTA1	0.883143	7.71818	23.9051	4.63864e-05	0.00470946	3	7	Up-regulated
Sus_scrofa___ENSSSCG00000002850	3.52819	-1.52607	21.3534	4.71577e-05	0.00474197	3	7	Up-regulated
Sus_scrofa___ISG12(A)	5.7958	5.82137	23.519	4.73098e-05	0.00474197	3	7	Up-regulated
Papio_anubis_PPIG	6.16533	-2.39293	25.3245	4.74433e-05	0.00474197	3	7	Up-regulated
pCMV_____gp73	8.50076	-1.48766	35.0329	4.89403e-05	0.00485635	3	7	Up-regulated
Sus_scrofa___DDC	2.17426	1.13631	23.7652	4.90403e-05	0.00485635	3	7	Up-regulated
Papio_anubis_ERBIN	3.62052	-1.77458	21.5497	4.98939e-05	0.00492572	3	7	Up-regulated
Sus_scrofa___NCK2	0.96698	5.75733	23.4725	5.21278e-05	0.00507145	3	7	Up-regulated
Sus_scrofa___ACBD3	0.915692	5.41474	23.4704	5.21579e-05	0.00507145	3	7	Up-regulated
Papio_anubis_ZFC3H1	4.86125	-1.57055	22.363	5.26021e-05	0.00508703	3	7	Up-regulated
Sus_scrofa___GPNMB	1.41751	4.48066	23.4372	5.26342e-05	0.00508703	3	7	Up-regulated
Sus_scrofa___RAB36	2.13154	-0.870078	22.6771	5.3708e-05	0.00516719	3	7	Up-regulated
Papio_anubis_ENSPANG00000011173	4.39733	-2.05053	22.6501	5.37848e-05	0.00516719	3	7	Up-regulated
Sus_scrofa___FBN2	2.95603	6.52727	23.256	5.52844e-05	0.00521698	3	7	Up-regulated
Sus_scrofa___ZC3HAV1	3.01409	5.42445	23.2481	5.54076e-05	0.00521698	3	7	Up-regulated
Sus_scrofa___SLC33A1	0.896391	5.85694	23.1098	5.75337e-05	0.00539844	3	7	Up-regulated
Sus_scrofa___CHCHD5	1.74625	1.06429	22.9922	6.01748e-05	0.00560588	3	7	Up-regulated
Papio_anubis_HNRNPU	2.96153	-0.0703248	22.1049	6.04873e-05	0.00560588	3	7	Up-regulated
Sus_scrofa___DTX3L	3.90241	3.24695	22.9545	6.0515e-05	0.00560588	3	7	Up-regulated
Sus_scrofa___H2AC20	2.58989	0.968459	22.9801	6.07015e-05	0.00560588	3	7	Up-regulated
Sus_scrofa___ATF5	2.15105	2.9473	22.9136	6.07895e-05	0.00560588	3	7	Up-regulated
Sus_scrofa___NIBAN2	1.86157	3.35004	22.8154	6.23974e-05	0.00571385	3	7	Up-regulated
Sus_scrofa___NFKB1	0.780404	7.37881	22.7997	6.26355e-05	0.00571385	3	7	Up-regulated
Papio_anubis_RNF19A	4.46844	-2.12467	22.3082	6.27557e-05	0.00571385	3	7	Up-regulated
Papio_anubis_RPS12	3.89598	-0.586654	20.4551	6.2848e-05	0.00571385	3	7	Up-regulated
Sus_scrofa___KIF3C	1.40536	4.13393	22.7356	6.37654e-05	0.00574853	3	7	Up-regulated
Sus_scrofa___SLC26A2	1.3459	2.03577	22.726	6.40923e-05	0.00576186	3	7	Up-regulated
Papio_anubis_CLTC	4.07649	-1.8607	21.7007	6.45405e-05	0.00577996	3	7	Up-regulated
Sus_scrofa___DYNC1H1	0.923925	6.02793	22.6761	6.48034e-05	0.00577996	3	7	Up-regulated
Sus_scrofa___LAX1	2.12534	0.365852	22.1896	6.48751e-05	0.00577996	3	7	Up-regulated
Sus_scrofa___HMGA1	1.8877	1.76453	22.5926	6.66471e-05	0.00590901	3	7	Up-regulated
Sus_scrofa___UHMK1	1.14905	3.71757	22.5376	6.73481e-05	0.00593844	3	7	Up-regulated
Sus_scrofa___GCLM	1.39379	4.00614	22.5064	6.7929e-05	0.00595738	3	7	Up-regulated
Sus_scrofa___CYP2E1	1.13967	3.18391	22.4993	6.80831e-05	0.00595738	3	7	Up-regulated
Sus_scrofa___TM2D3	0.955434	5.31857	22.4957	6.81182e-05	0.00595738	3	7	Up-regulated
Sus_scrofa___ZMYND8	0.767356	7.3212	22.4372	6.92283e-05	0.00602216	3	7	Up-regulated
Sus_scrofa___ANKRD37	2.24769	2.6263	22.3803	7.07915e-05	0.00612241	3	7	Up-regulated
Sus_scrofa___ENSSSCG00000033010	2.2469	3.82408	22.3572	7.0818e-05	0.00612241	3	7	Up-regulated
Papio_anubis_TRIP12	4.67996	-1.99897	26.5845	7.09563e-05	0.00612241	3	7	Up-regulated
Sus_scrofa___SH3PXD2B	1.63125	6.71077	22.2888	7.21418e-05	0.00620805	3	7	Up-regulated
Sus_scrofa___WTIP	1.34713	4.94815	22.221	7.35207e-05	0.00627747	3	7	Up-regulated
Sus_scrofa___RNF152	1.81693	5.17999	22.2202	7.35336e-05	0.00627747	3	7	Up-regulated
Sus_scrofa___SERP2	1.23089	3.95248	22.2003	7.39549e-05	0.00628723	3	7	Up-regulated
Sus_scrofa___COPZ2	1.46568	2.45631	22.2013	7.40386e-05	0.00628723	3	7	Up-regulated
Papio_anubis_TNPO1	3.057	-1.63865	19.3469	7.56407e-05	0.00639437	3	7	Up-regulated
Papio_anubis_ZMYM4	3.45102	-1.44051	20.1228	7.56977e-05	0.00639437	3	7	Up-regulated
Papio_anubis_TAOK3	3.63833	-1.52243	19.955	7.59701e-05	0.00640058	3	7	Up-regulated
Papio_anubis_SNX14	5.33413	-1.97956	26.489	7.64801e-05	0.00642672	3	7	Up-regulated
Papio_anubis_YTHDF2	3.92844	-2.30853	19.6569	7.75762e-05	0.00650186	3	7	Up-regulated
Sus_scrofa___IRF2	1.25482	6.70571	21.9594	7.90894e-05	0.00659433	3	7	Up-regulated
Sus_scrofa___HSPBAP1	1.09514	4.76847	21.9417	7.9489e-05	0.00661052	3	7	Up-regulated
Sus_scrofa___CEP112	1.30574	6.10562	21.904	8.03275e-05	0.00666304	3	7	Up-regulated
Sus_scrofa___ENSSSCG00000046695	3.93656	-2.5159	19.6584	8.0626e-05	0.00666781	3	7	Up-regulated
Papio_anubis_CTNND1	3.0776	-2.20671	19.8495	8.11309e-05	0.00667805	3	7	Up-regulated
Papio_anubis_DNAJC13	4.16545	-1.99801	19.8834	8.20618e-05	0.0067234	3	7	Up-regulated
Papio_anubis_CHCHD10	6.75547	-2.2862	22.3553	8.20997e-05	0.0067234	3	7	Up-regulated
Sus_scrofa___SRRM3	1.55739	2.47635	21.8062	8.26773e-05	0.00675352	3	7	Up-regulated
Sus_scrofa___DENND3	1.97214	3.16015	21.7593	8.37185e-05	0.00682126	3	7	Up-regulated
Papio_anubis_STRN3	5.72922	-2.31172	25.2743	8.41157e-05	0.00683621	3	7	Up-regulated
Papio_anubis_UBR5	3.53467	-1.53324	19.7716	8.43268e-05	0.00683621	3	7	Up-regulated
Sus_scrofa___TRIM21	2.84853	3.74259	21.6921	8.53149e-05	0.00689087	3	7	Up-regulated
Papio_anubis_PPP4R2	3.70847	-1.44469	20.1284	8.59934e-05	0.00690751	3	7	Up-regulated
Sus_scrofa___TUFT1	1.87546	2.0201	21.6803	8.60838e-05	0.00690751	3	7	Up-regulated
Sus_scrofa___EIF4E3	0.891009	5.86867	21.65	8.62794e-05	0.00690751	3	7	Up-regulated
Sus_scrofa___RIN3	1.66725	5.52869	21.6022	8.74528e-05	0.00698407	3	7	Up-regulated
Sus_scrofa___CCDC3	2.12972	2.58221	21.5881	8.79975e-05	0.00701018	3	7	Up-regulated
Papio_anubis_HBP1	3.69954	-2.44995	21.1467	9.11384e-05	0.00718921	3	7	Up-regulated
Sus_scrofa___ENSSSCG00000036469	2.40284	0.0494001	21.3825	9.23798e-05	0.00725159	3	7	Up-regulated
Sus_scrofa___UCK2	1.69716	7.7777	21.3758	9.32419e-05	0.00730145	3	7	Up-regulated
Sus_scrofa___ENSSSCG00000015027	1.43083	2.54199	21.3111	9.50846e-05	0.00739634	3	7	Up-regulated
Sus_scrofa___SEMA3B	2.09637	-0.475366	21.2372	9.50893e-05	0.00739634	3	7	Up-regulated
Sus_scrofa___SHISA5	2.37081	2.36038	21.3187	9.5143e-05	0.00739634	3	7	Up-regulated
Sus_scrofa___NQO1	1.83727	2.15476	21.2828	9.60742e-05	0.00745073	3	7	Up-regulated
Sus_scrofa___RNPEP	1.58883	2.50907	21.2216	9.76201e-05	0.00753431	3	7	Up-regulated
Papio_anubis_PPP4R3B	3.05435	-1.18784	20.8553	9.8754e-05	0.00758544	3	7	Up-regulated
pCMV_____gp33	7.57	-2.05457	30.195	9.95926e-05	0.00760848	3	7	Up-regulated
Papio_anubis_KIF5B	2.95628	-1.02572	19.6512	9.97171e-05	0.00760848	3	7	Up-regulated
Sus_scrofa___PRKCE	1.02312	10.0819	21.1384	9.97632e-05	0.00760848	3	7	Up-regulated
Papio_anubis_BTF3	5.23306	-2.61216	20.7963	0.000102644	0.00780967	3	7	Up-regulated
Papio_anubis_FOXJ3	2.81798	2.16104	21.0184	0.000103874	0.00783298	3	7	Up-regulated
Sus_scrofa___TRIM26	2.21139	3.7582	20.9943	0.000104031	0.00783298	3	7	Up-regulated
pCMV_____gp46	8.35591	-1.60403	29.8497	0.000105356	0.00790394	3	7	Up-regulated
Sus_scrofa___NCAM1	1.45844	10.0847	20.9194	0.000106216	0.00794993	3	7	Up-regulated
Sus_scrofa___TNNC2	2.51644	-0.819889	20.227	0.000106586	0.00795383	3	7	Up-regulated
Papio_anubis_WSB1	3.09053	-0.79748	19.7463	0.000107954	0.00802398	3	7	Up-regulated
Sus_scrofa___SLCO1A2	2.13834	-0.311167	20.8126	0.000108293	0.00803068	3	7	Up-regulated
Sus_scrofa___TSPAN14	2.70679	0.00790834	20.7311	0.000109119	0.00805477	3	7	Up-regulated
Sus_scrofa___TTC39C	1.69383	0.988099	20.8663	0.000109727	0.00806607	3	7	Up-regulated
Sus_scrofa___CCDC167	1.27955	2.40512	20.8096	0.000109773	0.00806607	3	7	Up-regulated
Papio_anubis_DDX17	2.80622	-0.71254	19.1022	0.00011079	0.00809047	3	7	Up-regulated
Sus_scrofa___KHNYN	1.64342	2.49576	20.7658	0.000111218	0.00809047	3	7	Up-regulated
Sus_scrofa___CEBPG	1.15601	3.93219	20.7408	0.000111833	0.00809047	3	7	Up-regulated
Papio_anubis_ENSPANG00000008041	3.44057	0.154288	19.8863	0.000111865	0.00809047	3	7	Up-regulated
pCMV_____gp45	10.3997	0.0488456	34.9789	0.000113759	0.00820902	3	7	Up-regulated
Sus_scrofa___ENSSSCG00000034802	4.59767	-1.48603	19.0698	0.000115886	0.00831105	3	7	Up-regulated
Sus_scrofa___B4GAT1	3.26289	-0.872868	18.8535	0.000115948	0.00831105	3	7	Up-regulated
Papio_anubis_PAPOLA	3.11892	-0.896416	18.7129	0.000119659	0.00848261	3	7	Up-regulated
Sus_scrofa___RESF1	1.1695	5.51826	20.4759	0.000120713	0.00850117	3	7	Up-regulated
Sus_scrofa___PARP9	3.51417	3.69565	20.4827	0.000121063	0.00850613	3	7	Up-regulated
Sus_scrofa___SNX24	1.01869	6.88188	20.4388	0.000122018	0.00851851	3	7	Up-regulated
Papio_anubis_HERC1	2.75788	-0.178284	19.8881	0.000122943	0.00853682	3	7	Up-regulated
Papio_anubis_ARHGEF12	2.92458	-1.46569	18.3413	0.000123076	0.00853682	3	7	Up-regulated
Sus_scrofa___CST3	3.30407	-0.255097	19.3297	0.000124794	0.00860064	3	7	Up-regulated
Papio_anubis_HNRNPD	2.71991	-1.55749	18.367	0.000124798	0.00860064	3	7	Up-regulated
Papio_anubis_ENSPANG00000043594	2.98267	-2.02805	18.5226	0.000126168	0.00865795	3	7	Up-regulated
Sus_scrofa___ENSSSCG00000012006	2.25159	4.43338	20.2663	0.000128335	0.00876929	3	7	Up-regulated
Sus_scrofa___STAC2	2.97398	6.49387	20.2423	0.000129478	0.00882864	3	7	Up-regulated
Sus_scrofa___ENSSSCG00000007554	1.54338	2.93129	20.2295	0.000129764	0.00882945	3	7	Up-regulated
Papio_anubis_USP9X	3.99541	-2.07959	20.7594	0.00013048	0.0088594	3	7	Up-regulated
Sus_scrofa___IRF7	3.28726	1.88916	20.1993	0.000132418	0.00897209	3	7	Up-regulated
Sus_scrofa___PHC3	0.809038	8.05485	20.0973	0.000134783	0.00911317	3	7	Up-regulated
Sus_scrofa___GAN	1.31615	6.38235	20.0692	0.000135898	0.00915007	3	7	Up-regulated
Papio_anubis_ENSPANG00000005380	3.45808	-1.74191	18.3161	0.000136849	0.00917572	3	7	Up-regulated
Papio_anubis_SNX13	4.33454	-1.74356	20.6302	0.000138655	0.00925826	3	7	Up-regulated
Sus_scrofa___ENSSSCG00000012566	0.960051	5.06594	19.9827	0.000139391	0.00928812	3	7	Up-regulated
Papio_anubis_PBRM1	2.87087	-1.37433	17.7578	0.000140062	0.00931355	3	7	Up-regulated
Sus_scrofa___FLNB	1.98265	3.72311	19.8665	0.000144282	0.00956486	3	7	Up-regulated
Sus_scrofa___CHD3	1.50293	3.69398	19.8227	0.00014614	0.00965785	3	7	Up-regulated
Papio_anubis_ELF2	3.05033	-1.99582	18.8009	0.000149319	0.0098276	3	7	Up-regulated
Papio_anubis_MYCBP2	4.67825	-2.01701	20.3364	0.000152568	0.00993978	3	7	Up-regulated
Sus_scrofa___SPRYD3	1.21396	2.78693	19.6283	0.000154849	0.010068	3	7	Up-regulated
Sus_scrofa___ABL2	0.847101	7.33171	19.5751	0.000157182	0.0101588	3	7	Up-regulated
Sus_scrofa___PROCA1	2.09463	2.5271	19.5565	0.000158264	0.0101871	3	7	Up-regulated
Papio_anubis_DYRK1A	3.60623	-2.13951	19.66	0.000159582	0.0102514	3	7	Up-regulated
Papio_anubis_MKLN1	5.15799	-2.30459	23.6822	0.000160391	0.0102625	3	7	Up-regulated
Papio_anubis_KAT6B	4.03787	-1.73775	18.2357	0.000160888	0.0102738	3	7	Up-regulated
Sus_scrofa___DDX11	1.32119	3.66842	19.4861	0.000161429	0.010288	3	7	Up-regulated
Sus_scrofa___SLC12A6	0.953552	6.97401	19.4507	0.000163093	0.0103563	3	7	Up-regulated
Papio_anubis_CLIP1	3.27779	-2.23482	17.8998	0.000163145	0.0103563	3	7	Up-regulated
pCMV_____gp43	6.9786	-2.36494	24.0297	0.000164442	0.0104181	3	7	Up-regulated
Sus_scrofa___MFSD2B	1.00853	3.58104	19.3986	0.000165681	0.0104585	3	7	Up-regulated
Sus_scrofa___ENSSSCG00000023324	0.739893	7.24902	19.3905	0.000166036	0.0104585	3	7	Up-regulated
Papio_anubis_SH3GLB1	2.74485	-1.59557	17.5153	0.000166296	0.0104585	3	7	Up-regulated
Sus_scrofa___TTC39A	2.00202	3.70527	19.3795	0.000166645	0.0104585	3	7	Up-regulated
Sus_scrofa___C3orf38	1.13866	4.99292	19.3767	0.00016673	0.0104585	3	7	Up-regulated
Sus_scrofa___TMEM181	0.943082	3.86599	19.371	0.00016703	0.0104585	3	7	Up-regulated
Papio_anubis_ACAP2	3.01173	-1.47861	18.5807	0.000168103	0.0105053	3	7	Up-regulated
Sus_scrofa___ENSSSCG00000006777	3.27643	0.759063	19.3872	0.000169506	0.0105142	3	7	Up-regulated
Sus_scrofa___ENSSSCG00000010401	0.945418	4.74666	19.3163	0.000169759	0.0105142	3	7	Up-regulated
Sus_scrofa___TMEM140	1.86448	3.03767	19.3128	0.000170051	0.0105142	3	7	Up-regulated
Sus_scrofa___UBE2Z	1.00236	5.06193	19.3074	0.000170205	0.0105142	3	7	Up-regulated
Sus_scrofa___FUT11	1.14505	2.96234	19.2753	0.000171941	0.0105662	3	7	Up-regulated
Sus_scrofa___BMP4	1.49005	3.46766	19.2728	0.000172032	0.0105662	3	7	Up-regulated
Sus_scrofa___PML	2.68117	5.74667	19.2365	0.000173848	0.0106371	3	7	Up-regulated
Sus_scrofa___PFKP	1.38028	4.29656	19.215	0.000174984	0.0106757	3	7	Up-regulated
Papio_anubis_GOLGB1	3.10043	-1.88071	17.0552	0.000175304	0.0106757	3	7	Up-regulated
Sus_scrofa___STAMBP	0.888671	5.14709	19.2053	0.000175474	0.0106757	3	7	Up-regulated
Papio_anubis_RAPGEF6	3.33201	-1.64966	17.6735	0.000178192	0.0107799	3	7	Up-regulated
Sus_scrofa___HMOX2	1.10164	7.2855	19.1341	0.000179243	0.0108101	3	7	Up-regulated
Papio_anubis_FAM13B	4.48581	-2.24984	20.8245	0.000179362	0.0108101	3	7	Up-regulated
Sus_scrofa___IGF2BP3	0.983538	6.70525	19.0645	0.000183025	0.0109856	3	7	Up-regulated
Sus_scrofa___LYN	1.41778	2.09395	19.0689	0.000183419	0.0109856	3	7	Up-regulated
Sus_scrofa___PSMA5	0.873797	4.24271	19.0068	0.000186243	0.0110771	3	7	Up-regulated
Sus_scrofa___ENSSSCG00000035836	2.80969	0.383949	19.0574	0.000186546	0.0110771	3	7	Up-regulated
Sus_scrofa___NFYA	0.861766	4.00542	18.983	0.000187584	0.0111179	3	7	Up-regulated
Sus_scrofa___ARHGAP31	1.15074	6.03268	18.9402	0.000189988	0.0112194	3	7	Up-regulated
Sus_scrofa___APAF1	1.2047	4.70267	18.8229	0.000196833	0.0115559	3	7	Up-regulated
Sus_scrofa___CDKN1A	1.86238	3.48291	18.8196	0.000197087	0.0115559	3	7	Up-regulated
Papio_anubis_ERO1A	3.63854	-1.75212	16.8856	0.000197122	0.0115559	3	7	Up-regulated
Sus_scrofa___LRP3	1.79317	1.1151	18.8235	0.000198514	0.0116129	3	7	Up-regulated
Papio_anubis_ENSPANG00000017406	4.76213	-2.83156	18.6832	0.000198817	0.0116129	3	7	Up-regulated
Papio_anubis_GPATCH8	2.42298	-0.794249	17.5079	0.000199422	0.0116181	3	7	Up-regulated
Sus_scrofa___RBM25	0.777441	7.65058	18.776	0.000199627	0.0116181	3	7	Up-regulated
pCMV_____gp48	7.74246	-1.9802	30.5263	0.000201093	0.0116822	3	7	Up-regulated
Papio_anubis_CHD9	2.62361	-0.717487	17.5085	0.000202586	0.0117267	3	7	Up-regulated
Sus_scrofa___MAP1B	1.05189	6.73343	18.7154	0.00020332	0.011748	3	7	Up-regulated
Papio_anubis_UVRAG	3.80999	-2.16704	19.0537	0.000206359	0.0118885	3	7	Up-regulated
Sus_scrofa___PSMF1	1.02977	7.06219	18.6643	0.000206489	0.0118885	3	7	Up-regulated
Sus_scrofa___LDLR	2.64821	0.970899	18.6965	0.000207901	0.0119059	3	7	Up-regulated
Sus_scrofa___PSMB9	2.57554	2.0261	18.5737	0.000211202	0.0120734	3	7	Up-regulated
Sus_scrofa___POLI	0.980331	4.32336	18.5512	0.000213711	0.0121736	3	7	Up-regulated
Sus_scrofa___BORCS6	2.68355	-1.72544	16.7914	0.000219055	0.0124121	3	7	Up-regulated
Sus_scrofa___ZNF800	0.851823	5.65633	18.4496	0.000220402	0.0124665	3	7	Up-regulated
Sus_scrofa___CDC42EP4	2.79503	0.0382332	18.3534	0.000221651	0.0125151	3	7	Up-regulated
Sus_scrofa___NANS	0.812081	5.73247	18.4086	0.000223173	0.012557	3	7	Up-regulated
Sus_scrofa___FKBP5	1.50181	8.69025	18.3701	0.000225804	0.0126608	3	7	Up-regulated
Sus_scrofa___SQLE	1.70026	4.67554	18.3597	0.000226539	0.0126799	3	7	Up-regulated
Papio_anubis_GOLGA4	3.09275	-0.765195	16.6808	0.000229864	0.0128436	3	7	Up-regulated
Sus_scrofa___LRIG2	0.71925	7.27868	18.2695	0.000232853	0.0129881	3	7	Up-regulated
Sus_scrofa___COL16A1	2.46248	2.01913	18.2449	0.000235889	0.0130638	3	7	Up-regulated
Papio_anubis_PSME4	3.57599	-1.60261	16.5849	0.000236101	0.0130638	3	7	Up-regulated
Sus_scrofa___EEA1	0.897589	7.44334	18.2161	0.000236692	0.0130638	3	7	Up-regulated
pCMV_____gp03	6.86047	-2.4444	24.8355	0.000236739	0.0130638	3	7	Up-regulated
Sus_scrofa___ENSSSCG00000007525	1.1329	2.28945	18.2033	0.00023795	0.0130638	3	7	Up-regulated
Papio_anubis_RNF10	2.81687	-1.3531	16.958	0.000238014	0.0130638	3	7	Up-regulated
Papio_anubis_CHD1	3.55524	-1.9032	17.0481	0.000238858	0.0130738	3	7	Up-regulated
Sus_scrofa___SDR42E1	1.91026	1.12785	18.1916	0.000240944	0.0130848	3	7	Up-regulated
Papio_anubis_ITPR2	4.25114	-1.66826	18.0352	0.00024109	0.0130848	3	7	Up-regulated
Sus_scrofa___SGK1	2.42855	1.0339	18.1528	0.000241091	0.0130848	3	7	Up-regulated
Papio_anubis_FBXO11	3.58397	-1.6945	17.363	0.000243079	0.0131298	3	7	Up-regulated
Sus_scrofa___ENSSSCG00000039071	2.68298	0.293266	18.1082	0.000243553	0.0131298	3	7	Up-regulated
Sus_scrofa___SLC25A13	0.735223	7.95581	18.0732	0.000247301	0.0133046	3	7	Up-regulated
Sus_scrofa___ENSSSCG00000010448	1.24647	4.50219	18.0383	0.000249987	0.0134093	3	7	Up-regulated
Sus_scrofa___OASL	2.4851	1.76484	18.0489	0.00025285	0.0134991	3	7	Up-regulated
Sus_scrofa___ENSSSCG00000002950	0.886573	6.58846	17.998	0.000253092	0.0134991	3	7	Up-regulated
Sus_scrofa___ENSSSCG00000003990	1.01421	3.32384	17.9939	0.000253496	0.0134991	3	7	Up-regulated
Papio_anubis_ACBD3	4.03208	-2.37108	17.6696	0.000253758	0.0134991	3	7	Up-regulated
Sus_scrofa___FARP1	0.875287	6.82841	17.98	0.0002545	0.0135162	3	7	Up-regulated
Sus_scrofa___DYSF	1.1321	7.8626	17.9072	0.000260276	0.0137775	3	7	Up-regulated
Sus_scrofa___ZFP36L2	2.86987	2.34741	17.9071	0.000261825	0.013823	3	7	Up-regulated
Papio_anubis_GPBP1	3.63652	-2.03283	16.1848	0.000261995	0.013823	3	7	Up-regulated
Sus_scrofa___POC1B	1.01161	3.74196	17.8777	0.000262708	0.013838	3	7	Up-regulated
Papio_anubis_ENSPANG00000017172	3.63948	-1.78703	16.3347	0.000264085	0.0138651	3	7	Up-regulated
Sus_scrofa___PRR16	1.07629	9.51136	17.7811	0.000270622	0.0141162	3	7	Up-regulated
Sus_scrofa___ENSSSCG00000015390	2.05021	0.0259638	17.296	0.000271459	0.0141272	3	7	Up-regulated
Sus_scrofa___TKT	0.905254	4.84279	17.7683	0.00027171	0.0141272	3	7	Up-regulated
Papio_anubis_PRKAA1	3.65703	-1.97284	15.9758	0.000272666	0.0141302	3	7	Up-regulated
pCMV_____gp25	8.77385	-1.29712	28.2715	0.000272927	0.0141302	3	7	Up-regulated
Papio_anubis_ENSPANG00000000627	3.56116	-2.39743	16.4295	0.000273255	0.0141302	3	7	Up-regulated
Sus_scrofa___LSM6	1.07812	4.3518	17.7301	0.000274957	0.0141302	3	7	Up-regulated
Papio_anubis_PHTF2	4.17143	-2.16424	18.8899	0.000275193	0.0141302	3	7	Up-regulated
Sus_scrofa___STN1	0.981762	4.88604	17.7265	0.000275254	0.0141302	3	7	Up-regulated
Sus_scrofa___ATP6V0D1	0.853559	4.1987	17.7087	0.000276789	0.014185	3	7	Up-regulated
Papio_anubis_BLTP1	4.20053	-1.65514	17.1099	0.000278765	0.0142409	3	7	Up-regulated
Sus_scrofa___ENSSSCG00000022322	1.40558	5.73696	17.6604	0.000280951	0.014282	3	7	Up-regulated
Sus_scrofa___TNNT1	1.50509	5.23087	17.6476	0.00028208	0.014282	3	7	Up-regulated
Papio_anubis_EIF3M	5.9126	-2.59605	22.2132	0.000282232	0.014282	3	7	Up-regulated
Papio_anubis_HECTD1	3.04346	-1.15283	15.9526	0.000283619	0.0143112	3	7	Up-regulated
Sus_scrofa___POPDC2	1.06799	5.96362	17.5907	0.000287106	0.0144006	3	7	Up-regulated
Papio_anubis_HSPA4	3.30113	-2.0415	15.9615	0.000287263	0.0144006	3	7	Up-regulated
Papio_anubis_PPP1R12A	1.8419	0.583069	17.1561	0.000287922	0.0144006	3	7	Up-regulated
Papio_anubis_CWC27	3.25397	-1.88875	16.2051	0.000288256	0.0144006	3	7	Up-regulated
Sus_scrofa___PSMD14	0.918227	6.58943	17.5382	0.000291833	0.0145168	3	7	Up-regulated
Papio_anubis_PABPC1	4.22029	-2.441	16.7431	0.000293721	0.0145882	3	7	Up-regulated
Sus_scrofa___SPG21	1.05684	3.23604	17.5011	0.000295336	0.0146457	3	7	Up-regulated
Sus_scrofa___ENSSSCG00000015645	1.0941	6.02737	17.4926	0.000296012	0.0146567	3	7	Up-regulated
Sus_scrofa___HEBP1	1.79864	1.9153	17.4513	0.000300905	0.0148532	3	7	Up-regulated
Sus_scrofa___STAT1	2.68957	7.48238	17.429	0.000301947	0.0148532	3	7	Up-regulated
Sus_scrofa___MRPS30	0.886045	5.54845	17.4099	0.000303758	0.01488	3	7	Up-regulated
Papio_anubis_NIN	3.23636	-2.18876	15.9628	0.000304861	0.0149113	3	7	Up-regulated
Papio_anubis_KMT2A	2.88109	-0.456501	16.7361	0.000309477	0.0150912	3	7	Up-regulated
Sus_scrofa___ENSSSCG00000010370	2.8653	-1.45241	15.6589	0.000310455	0.015116	3	7	Up-regulated
Sus_scrofa___SLC16A12	2.49723	2.26257	17.3444	0.000311437	0.0151241	3	7	Up-regulated
Sus_scrofa___SPIDR	1.76701	6.50877	17.3219	0.000312248	0.0151346	3	7	Up-regulated
Sus_scrofa___MYO1A	2.02755	-1.3933	16.2755	0.000314589	0.0152023	3	7	Up-regulated
pCMV_____gp49	8.6738	-1.29503	27.2463	0.000316179	0.0152222	3	7	Up-regulated
Papio_anubis_ITSN2	3.24028	-1.60472	15.6459	0.000317366	0.0152222	3	7	Up-regulated
Sus_scrofa___CMTM8	2.15468	2.33963	17.2682	0.000318036	0.0152316	3	7	Up-regulated
Sus_scrofa___CHMP5	0.975	3.00545	17.2031	0.000324252	0.0154833	3	7	Up-regulated
Papio_anubis_MED13	2.70165	-0.464437	16.0626	0.00032571	0.0155299	3	7	Up-regulated
Sus_scrofa___SCAMP4	1.05849	2.527	17.1404	0.000330844	0.015728	3	7	Up-regulated
Sus_scrofa___AKR1D1	1.50653	4.9047	17.1231	0.000332378	0.0157333	3	7	Up-regulated
Sus_scrofa___MAMLD1	1.28611	5.01057	17.118	0.000332909	0.0157333	3	7	Up-regulated
Papio_anubis_ENSPANG00000017841	3.5354	-0.899567	16.0995	0.000334333	0.0157543	3	7	Up-regulated
Sus_scrofa___AEBP2	0.755569	7.3744	17.0831	0.000336585	0.0158359	3	7	Up-regulated
Sus_scrofa___MAPRE3	1.00357	5.45006	17.0787	0.000337049	0.0158359	3	7	Up-regulated
Papio_anubis_PDS5A	4.26614	-1.76069	17.5045	0.000341611	0.0159802	3	7	Up-regulated
pCMV_____gp40	6.89362	-2.41817	22.8331	0.000343419	0.0160236	3	7	Up-regulated
Papio_anubis_KMT2C	4.01693	-1.64759	15.663	0.000345544	0.0160941	3	7	Up-regulated
Sus_scrofa___SUSD1	1.08869	4.3353	16.9728	0.000348532	0.0161864	3	7	Up-regulated
Papio_anubis_SOS2	3.73646	-1.76252	15.949	0.000350984	0.0162768	3	7	Up-regulated
Sus_scrofa___YPEL5	1.05783	5.4613	16.9275	0.000353546	0.0163484	3	7	Up-regulated
Sus_scrofa___SLC43A2	2.09175	2.32372	16.9268	0.000354602	0.0163738	3	7	Up-regulated
Papio_anubis_DDX6	2.96132	-1.28554	16.2051	0.000356725	0.0164298	3	7	Up-regulated
Papio_anubis_ZNF106	3.15325	-1.93005	15.3606	0.000356837	0.0164298	3	7	Up-regulated
Sus_scrofa___NSD2	1.00125	5.11109	16.8602	0.000361167	0.0166054	3	7	Up-regulated
Sus_scrofa___CTSH	1.65075	3.9759	16.8522	0.000362173	0.016626	3	7	Up-regulated
pCMV_____gp61	8.2453	-1.63581	26.2509	0.000366935	0.0167206	3	7	Up-regulated
Sus_scrofa___TOR1AIP2	1.04202	3.26429	16.8078	0.000367327	0.0167206	3	7	Up-regulated
Papio_anubis_PHF14	3.66466	-1.95693	16.1676	0.000368348	0.0167206	3	7	Up-regulated
Papio_anubis_MANBA	3.82092	-1.44667	15.5961	0.000370029	0.0167733	3	7	Up-regulated
Papio_anubis_COP1	5.87413	-2.09568	20.5934	0.00037083	0.0167764	3	7	Up-regulated
Sus_scrofa___LIPA	1.9272	6.09517	16.7681	0.000371883	0.0167764	3	7	Up-regulated
Sus_scrofa___ENSSSCG00000008767	2.61251	-0.518671	15.8911	0.000376627	0.0168698	3	7	Up-regulated
pCMV_____gp06	7.36267	-2.20151	26.0114	0.000376835	0.0168698	3	7	Up-regulated
Papio_anubis_GSPT1	3.66529	-2.60287	16.4224	0.000378791	0.0169319	3	7	Up-regulated
Papio_anubis_TLK2	2.87406	-1.39721	16.1029	0.000379918	0.0169353	3	7	Up-regulated
Papio_anubis_EEA1	2.09315	1.32352	16.6807	0.000381681	0.0169829	3	7	Up-regulated
pCMV_____gp32	8.36148	-1.60442	25.9765	0.000382041	0.0169829	3	7	Up-regulated
Sus_scrofa___ENSSSCG00000012071	2.29853	0.348679	16.7137	0.000383801	0.0170376	3	7	Up-regulated
Sus_scrofa___ENSSSCG00000002935	0.90477	4.39499	16.6489	0.000386289	0.0171022	3	7	Up-regulated
Sus_scrofa___SLC24A3	1.37471	3.7321	16.649	0.000386319	0.0171022	3	7	Up-regulated
Sus_scrofa___CTSD	1.22748	4.61012	16.6191	0.000389976	0.0172239	3	7	Up-regulated
Sus_scrofa___SLCO3A1	0.946307	9.78768	16.6015	0.000392144	0.0172469	3	7	Up-regulated
Sus_scrofa___SGSH	2.69013	-1.19693	15.5549	0.000392779	0.0172469	3	7	Up-regulated
Sus_scrofa___PLEKHF1	1.67089	3.20917	16.5908	0.000393697	0.0172469	3	7	Up-regulated
Sus_scrofa___ZNF710	0.80802	5.2414	16.5884	0.000393796	0.0172469	3	7	Up-regulated
Sus_scrofa___KDM4C	0.755707	8.55448	16.5778	0.000395127	0.0172469	3	7	Up-regulated
Papio_anubis_IBTK	4.05497	-2.43782	17.1779	0.000396554	0.0172469	3	7	Up-regulated
Sus_scrofa___TLR3	2.08527	1.05791	16.5894	0.000398693	0.0172932	3	7	Up-regulated
Sus_scrofa___MAF	2.23805	0.00107432	16.4438	0.000400173	0.0173143	3	7	Up-regulated
Sus_scrofa___SLC31A2	1.57598	1.22801	16.558	0.000400255	0.0173143	3	7	Up-regulated
Sus_scrofa___PGAM2	1.77398	3.07902	16.5184	0.000402889	0.0173843	3	7	Up-regulated
Papio_anubis_AKAP9	2.09651	-0.45311	15.6822	0.000404414	0.0174239	3	7	Up-regulated
Sus_scrofa___NLRC5	2.70648	6.3149	16.4832	0.000407318	0.0174904	3	7	Up-regulated
Sus_scrofa___ENSSSCG00000039731	1.5702	3.15883	16.4768	0.000408305	0.0174929	3	7	Up-regulated
Sus_scrofa___TFAP4	1.71982	0.481888	16.5124	0.000408732	0.0174929	3	7	Up-regulated
Sus_scrofa___FAM180A	2.03876	2.6576	16.451	0.000412153	0.0176159	3	7	Up-regulated
Papio_anubis_ZFR	3.65962	-2.19223	15.983	0.000414223	0.0176808	3	7	Up-regulated
Sus_scrofa___HMGCR	1.13504	2.78692	16.4168	0.000416287	0.0177219	3	7	Up-regulated
Sus_scrofa___PSMD4	0.679453	5.08996	16.3478	0.000425363	0.0179916	3	7	Up-regulated
Sus_scrofa___PHTF1	0.825578	5.71006	16.3331	0.000427372	0.0180438	3	7	Up-regulated
Sus_scrofa___RPL37A	2.02764	4.11286	16.3297	0.000427985	0.0180438	3	7	Up-regulated
Sus_scrofa___MAFG	1.34572	2.81156	16.328	0.000428332	0.0180438	3	7	Up-regulated
Sus_scrofa___TNFRSF1B	2.67144	-1.57208	14.6812	0.000429263	0.0180594	3	7	Up-regulated
Papio_anubis_RAP1A	3.01118	-1.41155	14.9584	0.000432454	0.0181462	3	7	Up-regulated
Sus_scrofa___ENSSSCG00000000097	0.806845	3.53899	16.2402	0.000440424	0.018385	3	7	Up-regulated
Sus_scrofa___CSTB	1.89586	1.70116	16.2506	0.000441129	0.018385	3	7	Up-regulated
Sus_scrofa___HECTD4	0.898746	8.92609	16.2292	0.000441903	0.018385	3	7	Up-regulated
Sus_scrofa___ZNF22	0.976452	3.05257	16.2287	0.000442146	0.018385	3	7	Up-regulated
Papio_anubis_P4HA1	3.26991	-2.61908	15.1875	0.000444114	0.0184193	3	7	Up-regulated
Sus_scrofa___SLC20A2	1.17765	9.13689	16.2095	0.000444728	0.018421	3	7	Up-regulated
Sus_scrofa___ANKRD2	2.65668	4.36706	16.2066	0.000445503	0.0184294	3	7	Up-regulated
Papio_anubis_SETD2	2.98748	-1.76025	14.7887	0.000447707	0.0184494	3	7	Up-regulated
Sus_scrofa___MBOAT1	1.24979	5.29944	16.1512	0.000453178	0.0185916	3	7	Up-regulated
Papio_anubis_SOS1	3.41307	-1.66812	14.7706	0.000453469	0.0185916	3	7	Up-regulated
Papio_anubis_ELOA	3.07183	1.06933	15.4358	0.000455125	0.0186358	3	7	Up-regulated
Papio_anubis_AGFG1	3.78096	-2.31169	16.877	0.000456545	0.0186375	3	7	Up-regulated
Papio_anubis_RSF1	3.09121	-2.13527	15.1611	0.000456903	0.0186375	3	7	Up-regulated
Sus_scrofa___TMEM192	1.04892	3.1733	16.1	0.000460888	0.0187288	3	7	Up-regulated
Sus_scrofa___ENSSSCG00000003621	0.996151	2.92383	16.0788	0.000464112	0.018836	3	7	Up-regulated
Sus_scrofa___SLC37A3	0.965586	4.35029	16.0608	0.000466658	0.0188917	3	7	Up-regulated
Sus_scrofa___ENSSSCG00000043413	2.93682	-2.00396	14.3567	0.00046843	0.0189396	3	7	Up-regulated
Sus_scrofa___ZDHHC18	0.867332	4.03796	16.0237	0.00047231	0.0190341	3	7	Up-regulated
Sus_scrofa___PYGO1	1.37663	2.16353	15.9926	0.000477732	0.0191236	3	7	Up-regulated
Sus_scrofa___PDE6D	1.00169	5.17477	15.9785	0.000479255	0.0191607	3	7	Up-regulated
Sus_scrofa___PSMD3	0.816344	4.88588	15.9728	0.000480138	0.0191722	3	7	Up-regulated
Sus_scrofa___PLXND1	2.56495	-1.55742	14.839	0.000489399	0.0195158	3	7	Up-regulated
Papio_anubis_PCF11	3.22116	-1.46062	14.7673	0.000493283	0.019624	3	7	Up-regulated
Papio_anubis_TUT4	2.35743	-0.130892	15.5744	0.000495037	0.0196241	3	7	Up-regulated
Sus_scrofa___ZBTB37	0.705676	5.29108	15.855	0.000498885	0.0197492	3	7	Up-regulated
pCMV_____gp50	8.08712	-1.79687	24.2298	0.00050032	0.0197739	3	7	Up-regulated
Sus_scrofa___APLP2	0.686155	6.45547	15.8436	0.000500737	0.0197739	3	7	Up-regulated
Sus_scrofa___TMED7	0.902373	4.06241	15.8009	0.000507813	0.0200194	3	7	Up-regulated
Sus_scrofa___MRPS9	0.687972	6.14806	15.7947	0.000508792	0.0200194	3	7	Up-regulated
Sus_scrofa___PEX7	0.792446	5.66314	15.7904	0.000509502	0.0200217	3	7	Up-regulated
Sus_scrofa___TANGO2	2.58604	-1.14049	14.8145	0.000512107	0.020029	3	7	Up-regulated
Sus_scrofa___HS3ST1	2.16296	-0.0993287	15.6855	0.000519784	0.0203019	3	7	Up-regulated
Sus_scrofa___ENSSSCG00000024660	2.90932	1.35308	15.7549	0.00052145	0.0203422	3	7	Up-regulated
Papio_anubis_ATF6	5.16255	-2.62905	17.9885	0.00052287	0.0203509	3	7	Up-regulated
Sus_scrofa___HIVEP1	0.885232	6.25285	15.7107	0.000522935	0.0203509	3	7	Up-regulated
Sus_scrofa___ANKRD13A	0.919661	4.51886	15.6926	0.000526067	0.0204007	3	7	Up-regulated
Sus_scrofa___TTF2	1.26646	2.98153	15.6937	0.000526117	0.0204007	3	7	Up-regulated
Papio_anubis_VPS54	3.07161	-1.44017	14.3373	0.000526943	0.0204081	3	7	Up-regulated
Sus_scrofa___ENSSSCG00000043778	1.02267	5.09689	15.666	0.000530659	0.0205139	3	7	Up-regulated
Sus_scrofa___TREX1	2.24006	0.673356	15.7022	0.000530949	0.0205139	3	7	Up-regulated
pCMV_____gp62	6.72715	-2.51126	23.5367	0.000533342	0.0205324	3	7	Up-regulated
Sus_scrofa___ENSSSCG00000022246	2.60208	-0.461288	14.6153	0.000538387	0.0206525	3	7	Up-regulated
Sus_scrofa___CCDC15	0.887455	5.19626	15.6168	0.000539267	0.0206616	3	7	Up-regulated
pCMV_____gp35	5.73225	-2.82756	18.2455	0.000546048	0.0208809	3	7	Up-regulated
Sus_scrofa___PMM1	1.31905	2.81119	15.5792	0.000546288	0.0208809	3	7	Up-regulated
Sus_scrofa___ETV5	2.21844	1.63588	15.5899	0.000550783	0.0209763	3	7	Up-regulated
Papio_anubis_UBE3A	2.27087	-0.0162517	15.2977	0.000551911	0.0209763	3	7	Up-regulated
Sus_scrofa___ENSSSCG00000050862	2.69812	-1.64765	14.4407	0.000552042	0.0209763	3	7	Up-regulated
Sus_scrofa___KLHL42	1.30726	3.54709	15.5318	0.000554641	0.0210502	3	7	Up-regulated
Sus_scrofa___CSNK1G1	0.771843	7.12703	15.5256	0.000555645	0.0210621	3	7	Up-regulated
Sus_scrofa___BACE2	1.06264	7.0675	15.515	0.000557588	0.0210621	3	7	Up-regulated
Sus_scrofa___ARL2BP	1.16396	2.37495	15.5144	0.000558226	0.0210621	3	7	Up-regulated
Papio_anubis_RAB6A	3.28067	-1.5884	14.1995	0.000560829	0.0211355	3	7	Up-regulated
pCMV_____gp47	6.4856	-2.59603	20.2015	0.000562375	0.0211374	3	7	Up-regulated
Sus_scrofa___HELB	1.13296	4.42704	15.4867	0.000562849	0.0211374	3	7	Up-regulated
Sus_scrofa___KCNMA1	1.32465	8.0206	15.4787	0.000564279	0.0211417	3	7	Up-regulated
Sus_scrofa___ENSSSCG00000016791	3.12969	0.164912	15.4485	0.000572178	0.0213631	3	7	Up-regulated
Sus_scrofa___ENDOV	1.29195	4.45376	15.4198	0.000575377	0.0214328	3	7	Up-regulated
pCMV_____gp09	7.60631	-2.04783	23.3142	0.00057751	0.0214874	3	7	Up-regulated
Sus_scrofa___NTSR2	2.04029	0.993482	15.4326	0.000578901	0.0214925	3	7	Up-regulated
Sus_scrofa___SUSD6	1.00672	5.46112	15.4007	0.000578983	0.0214925	3	7	Up-regulated
Sus_scrofa___TMEM203	1.91443	0.306395	15.3732	0.000589847	0.0218112	3	7	Up-regulated
Sus_scrofa___TIGD4	1.50259	0.516726	15.3773	0.00059028	0.0218112	3	7	Up-regulated
Sus_scrofa___RPS6KA1	1.62802	0.60608	15.1741	0.000594527	0.0218928	3	7	Up-regulated
Sus_scrofa___SEPTIN11	1.33878	5.50791	15.3114	0.000596299	0.0219329	3	7	Up-regulated
Sus_scrofa___RUSF1	0.897306	3.53084	15.2987	0.00059892	0.0219793	3	7	Up-regulated
Sus_scrofa___MTURN	2.22345	1.64741	15.3248	0.000598926	0.0219793	3	7	Up-regulated
Sus_scrofa___GEMIN8	1.00086	2.44238	15.2862	0.000601762	0.0220438	3	7	Up-regulated
Sus_scrofa___CASK	0.869478	5.82453	15.2824	0.000602054	0.0220438	3	7	Up-regulated
Sus_scrofa___STMN1	2.57701	-0.40556	14.8847	0.000603455	0.0220643	3	7	Up-regulated
Sus_scrofa___ENSSSCG00000039365	3.5642	-1.9957	13.8535	0.000608432	0.0221764	3	7	Up-regulated
Papio_anubis_NEMF	2.56214	-1.42226	14.3317	0.000618333	0.0224355	3	7	Up-regulated
Sus_scrofa___ENSSSCG00000049262	2.68877	-1.70657	13.6782	0.000619024	0.0224355	3	7	Up-regulated
Sus_scrofa___ENSSSCG00000007735	0.827056	6.53481	15.1741	0.000624039	0.0225664	3	7	Up-regulated
Sus_scrofa___F2RL2	2.76601	-1.17125	14.4813	0.000625171	0.0225819	3	7	Up-regulated
Sus_scrofa___FSTL3	1.32553	4.42578	15.1622	0.000626554	0.0225887	3	7	Up-regulated
Sus_scrofa___UBB	2.39286	4.15372	15.1608	0.000626875	0.0225887	3	7	Up-regulated
Sus_scrofa___BMP1	1.68898	4.66382	15.1578	0.000627464	0.0225887	3	7	Up-regulated
Sus_scrofa___MORC3	1.09802	5.77931	15.1088	0.000637725	0.0228576	3	7	Up-regulated
Papio_anubis_IFIH1	4.63043	-2.74269	16.6178	0.000639142	0.0228576	3	7	Up-regulated
Sus_scrofa___ACER2	1.78601	2.20385	15.1077	0.00063923	0.0228576	3	7	Up-regulated
Papio_anubis_TNKS2	5.0171	-2.82584	14.9463	0.000639905	0.0228576	3	7	Up-regulated
Sus_scrofa___ENSSSCG00000022794	1.76006	0.820511	15.1196	0.000641678	0.0228928	3	7	Up-regulated
Sus_scrofa___P4HB	1.06036	3.69455	15.0878	0.000642313	0.0228928	3	7	Up-regulated
Sus_scrofa___TSEN2	1.63876	5.50025	15.0647	0.000647163	0.0229972	3	7	Up-regulated
Sus_scrofa___GPATCH2	0.751832	6.77812	15.0458	0.000651234	0.0230856	3	7	Up-regulated
Papio_anubis_LUC7L3	2.11375	-0.265901	14.5488	0.000652923	0.0231174	3	7	Up-regulated
pCMV_____gp56	7.42876	-2.151	22.5334	0.000654113	0.023134	3	7	Up-regulated
Papio_anubis_BCLAF1	1.95334	-0.315069	14.6617	0.000658867	0.0232116	3	7	Up-regulated
Sus_scrofa___CREB3L2	0.888444	6.41654	15.0104	0.000658964	0.0232116	3	7	Up-regulated
pCMV_____gp04	6.41901	-2.63901	22.0719	0.000659192	0.0232116	3	7	Up-regulated
Papio_anubis_WASHC4	2.28172	-0.560138	14.3361	0.000663903	0.0232756	3	7	Up-regulated
Sus_scrofa___BLVRB	1.36065	2.73932	14.9846	0.00066516	0.0232944	3	7	Up-regulated
Sus_scrofa___ENC1	2.46145	2.04465	14.9464	0.000676822	0.0236256	3	7	Up-regulated
Sus_scrofa___RAB18	0.597666	6.79469	14.9217	0.000678744	0.0236671	3	7	Up-regulated
Sus_scrofa___YIPF1	0.852121	5.22487	14.8725	0.000690026	0.0239051	3	7	Up-regulated
pCMV_____gp24	7.44806	-2.16468	22.0743	0.000706782	0.0243806	3	7	Up-regulated
Sus_scrofa___TTC9	2.34013	0.344081	14.6575	0.000712913	0.0245657	3	7	Up-regulated
Sus_scrofa___ENSSSCG00000016119	1.25596	6.3846	14.7603	0.000716447	0.0246611	3	7	Up-regulated
Sus_scrofa___HP1BP3	0.627131	6.99479	14.7283	0.00072419	0.0248702	3	7	Up-regulated
Papio_anubis_RCOR3	2.66625	-1.1123	13.8416	0.000724839	0.0248702	3	7	Up-regulated
Sus_scrofa___RABIF	1.48093	2.30496	14.7158	0.000728171	0.0249579	3	7	Up-regulated
Sus_scrofa___DAD1	0.891444	4.08739	14.6967	0.000731997	0.0250357	3	7	Up-regulated
Sus_scrofa___RBCK1	0.828761	3.83472	14.6662	0.000739583	0.0252415	3	7	Up-regulated
Sus_scrofa___OSTC	1.17028	2.48462	14.6646	0.000740471	0.025245	3	7	Up-regulated
Sus_scrofa___MAP1LC3B	0.810365	5.19609	14.6536	0.000742622	0.0252521	3	7	Up-regulated
Sus_scrofa___CXorf38	1.40798	1.85056	14.6594	0.000742761	0.0252521	3	7	Up-regulated
Sus_scrofa___MGST3	1.17757	4.70472	14.649	0.000743816	0.0252521	3	7	Up-regulated
pCMV_____gp59	7.31163	-2.23392	21.7397	0.000745176	0.0252716	3	7	Up-regulated
Sus_scrofa___ERAP2	2.21982	1.2928	14.6709	0.000748815	0.0253362	3	7	Up-regulated
Papio_anubis_ORC4	5.13866	-2.74466	15.386	0.000749443	0.0253362	3	7	Up-regulated
Sus_scrofa___CHIC2	0.823043	6.38968	14.614	0.000752588	0.0253959	3	7	Up-regulated
Sus_scrofa___GOLT1B	1.50276	2.11223	14.617	0.000752788	0.0253959	3	7	Up-regulated
pCMV_____gp52	7.33391	-2.22553	21.6004	0.000763716	0.0256838	3	7	Up-regulated
Sus_scrofa___SLC16A3	1.78323	2.72772	14.5566	0.000772554	0.0259539	3	7	Up-regulated
Sus_scrofa___TMOD3	0.887982	5.84921	14.5148	0.000778219	0.0260418	3	7	Up-regulated
Sus_scrofa___C10orf67	1.26962	2.14533	14.5171	0.000778516	0.0260418	3	7	Up-regulated
Sus_scrofa___DNAJC16	0.739318	4.91331	14.5123	0.000778896	0.0260418	3	7	Up-regulated
Sus_scrofa___SLC39A11	0.715471	5.89749	14.511	0.000779215	0.0260418	3	7	Up-regulated
Sus_scrofa___TCTN2	1.30013	5.17122	14.5016	0.000781704	0.0260979	3	7	Up-regulated
Sus_scrofa___CADPS2	2.21153	3.65128	14.4919	0.000784574	0.0261666	3	7	Up-regulated
Sus_scrofa___PTP4A1	1.27221	5.12636	14.4856	0.000785965	0.0261858	3	7	Up-regulated
Sus_scrofa___SCARF2	2.31835	-1.25282	13.9291	0.000791268	0.0263352	3	7	Up-regulated
Sus_scrofa___CEP44	1.16418	3.16566	14.4508	0.000795518	0.0264339	3	7	Up-regulated
Sus_scrofa___VANGL1	0.852926	4.11288	14.4488	0.000795876	0.0264339	3	7	Up-regulated
Sus_scrofa___MTHFD2L	0.655019	7.16558	14.4349	0.000799544	0.0265284	3	7	Up-regulated
Papio_anubis_NSD1	3.5794	-1.86195	13.7435	0.000801467	0.0265326	3	7	Up-regulated
Sus_scrofa___ENSSSCG00000002953	2.09827	0.381409	14.4433	0.000805634	0.026556	3	7	Up-regulated
Sus_scrofa___ME1	1.11163	5.3034	14.4107	0.000806152	0.026556	3	7	Up-regulated
Sus_scrofa___ARFIP1	0.621263	7.1792	14.4009	0.000808806	0.0265654	3	7	Up-regulated
Sus_scrofa___RPUSD3	1.1271	2.57317	14.4023	0.000808913	0.0265654	3	7	Up-regulated
Sus_scrofa___LAMTOR1	1.28549	2.16005	14.3749	0.000816874	0.0267198	3	7	Up-regulated
Papio_anubis_TNRC6A	2.19013	-0.614659	13.5754	0.000816937	0.0267198	3	7	Up-regulated
Sus_scrofa___OSTM1	0.9491	2.95501	14.369	0.00081793	0.0267251	3	7	Up-regulated
Sus_scrofa___PHF11	1.24324	6.70906	14.3585	0.00082054	0.0267481	3	7	Up-regulated
Papio_anubis_NFIA	1.93575	-0.781256	13.7224	0.000820623	0.0267481	3	7	Up-regulated
Sus_scrofa___ENSSSCG00000002793	1.77458	0.0835893	14.3781	0.000821126	0.0267481	3	7	Up-regulated
Sus_scrofa___FUNDC1	1.59205	3.5538	14.3473	0.000823813	0.0268085	3	7	Up-regulated
Sus_scrofa___SC5D	1.40597	1.06699	14.3449	0.000829094	0.0269525	3	7	Up-regulated
Sus_scrofa___ENSSSCG00000014094	0.653744	6.10765	14.3106	0.000834017	0.0270585	3	7	Up-regulated
Sus_scrofa___DHRS13	1.6342	1.43046	14.3179	0.000836908	0.0271249	3	7	Up-regulated
Sus_scrofa___ENSSSCG00000045560	1.13183	4.91901	14.2817	0.000842268	0.0272349	3	7	Up-regulated
pCMV_____gp17	7.04315	-2.35935	20.9645	0.000842664	0.0272349	3	7	Up-regulated
Sus_scrofa___ENSSSCG00000049674	2.32841	1.2191	14.2667	0.000842839	0.0272349	3	7	Up-regulated
Sus_scrofa___ALPK2	0.766917	8.8663	14.2764	0.000843753	0.0272371	3	7	Up-regulated
Sus_scrofa___ENSSSCG00000014997	3.03405	1.58161	14.2829	0.000844659	0.027239	3	7	Up-regulated
Sus_scrofa___CAVIN3	2.5895	-1.68268	13.5294	0.000845858	0.0272503	3	7	Up-regulated
Papio_anubis_ENSPANG00000019915	3.92106	-2.70233	13.8676	0.000847187	0.0272659	3	7	Up-regulated
pCMV_____gp65	6.3012	-2.68476	20.546	0.00085	0.0273291	3	7	Up-regulated
Sus_scrofa___LAMTOR2	1.68331	0.667823	14.2571	0.000856624	0.0275146	3	7	Up-regulated
Papio_anubis_MBNL1	3.77466	-1.91086	13.7091	0.000859763	0.0275511	3	7	Up-regulated
Sus_scrofa___SLC1A5	2.38224	-1.12239	13.4938	0.000867632	0.0277477	3	7	Up-regulated
Sus_scrofa___CDKN1C	2.4704	-1.70028	13.0514	0.000869057	0.0277477	3	7	Up-regulated
Sus_scrofa___C14orf93	0.757767	4.24331	14.164	0.00087678	0.0279495	3	7	Up-regulated
Sus_scrofa___ADRM1	0.963624	2.81041	14.1641	0.000877113	0.0279495	3	7	Up-regulated
Papio_anubis_CUL3	2.53398	-1.04839	13.8288	0.00087895	0.0279527	3	7	Up-regulated
Sus_scrofa___ETS1	1.57203	4.02085	14.1343	0.000885876	0.0281036	3	7	Up-regulated
Sus_scrofa___KHDRBS1	0.634401	6.90049	14.1325	0.000886212	0.0281036	3	7	Up-regulated
Sus_scrofa___VAV2	1.41352	4.00874	14.116	0.000891301	0.028218	3	7	Up-regulated
Sus_scrofa___GOLGB1	0.707016	7.1587	14.1012	0.000895726	0.0282905	3	7	Up-regulated
Papio_anubis_USP25	2.90222	-1.36897	13.3976	0.000905672	0.0285552	3	7	Up-regulated
Papio_anubis_EIF3A	2.41292	-1.26167	13.6845	0.000909806	0.0286073	3	7	Up-regulated
Sus_scrofa___THNSL2	0.886401	5.11694	14.0535	0.000910498	0.0286073	3	7	Up-regulated
Sus_scrofa___PRR14L	0.728503	5.611	14.0483	0.000912102	0.0286073	3	7	Up-regulated
Sus_scrofa___PERP	1.12927	3.03667	14.041	0.000914645	0.0286073	3	7	Up-regulated
Sus_scrofa___ENSSSCG00000011859	1.38279	2.38014	14.0378	0.000916318	0.0286318	3	7	Up-regulated
Papio_anubis_MATR3	1.96349	-0.97035	13.5526	0.000917348	0.0286362	3	7	Up-regulated
pCMV_____gp39	7.23514	-2.24683	20.4886	0.000924539	0.028751	3	7	Up-regulated
Sus_scrofa___UTRN	0.809146	8.97792	14.0086	0.0009246	0.028751	3	7	Up-regulated
Papio_anubis_ENSPANG00000025744	2.62942	-0.80473	13.219	0.00092814	0.0288333	3	7	Up-regulated
Sus_scrofa___ARPC5	1.44726	3.89824	13.984	0.000932568	0.0288701	3	7	Up-regulated
pCMV_____gp23	6.89362	-2.43363	20.3413	0.000933288	0.0288701	3	7	Up-regulated
Sus_scrofa___ENSSSCG00000044995	1.58091	1.45742	13.9901	0.000933812	0.0288701	3	7	Up-regulated
Papio_anubis_SCAPER	4.55067	-2.34809	15.5474	0.00093751	0.0289012	3	7	Up-regulated
Sus_scrofa___GPR137B	1.26256	2.60673	13.9629	0.000939864	0.0289233	3	7	Up-regulated
Sus_scrofa___MCPH1	0.806557	5.08461	13.9577	0.000940923	0.0289233	3	7	Up-regulated
Papio_anubis_CLOCK	3.41701	-2.21748	12.9548	0.000943143	0.0289639	3	7	Up-regulated
Sus_scrofa___EIF4EBP2	1.06403	5.74087	13.9315	0.00094939	0.0290792	3	7	Up-regulated
pCMV_____gp67	6.87042	-2.44211	20.1917	0.000957396	0.029262	3	7	Up-regulated
Sus_scrofa___ATMIN	0.844908	4.36736	13.8934	0.000961965	0.0292678	3	7	Up-regulated
Sus_scrofa___SOCS6	0.875719	4.465	13.8911	0.000962715	0.0292678	3	7	Up-regulated
Sus_scrofa___PACSIN3	0.991865	5.28803	13.8899	0.00096309	0.0292678	3	7	Up-regulated
pCMV_____gp60	7.13778	-2.30012	20.2366	0.000963475	0.0292678	3	7	Up-regulated
Sus_scrofa___PTP4A2	0.733534	8.20605	13.8873	0.000963953	0.0292678	3	7	Up-regulated
Sus_scrofa___ZDHHC20	0.787428	6.35768	13.8809	0.000966058	0.0293041	3	7	Up-regulated
Sus_scrofa___CYBRD1	2.1027	1.30002	13.9006	0.000967052	0.0293066	3	7	Up-regulated
Papio_anubis_RNF216	3.64715	-2.80086	14.3283	0.000971439	0.0293842	3	7	Up-regulated
Sus_scrofa___DLG5	1.19714	6.82934	13.8203	0.000986441	0.0297489	3	7	Up-regulated
Sus_scrofa___GFOD2	0.968781	4.32605	13.8169	0.000987673	0.0297489	3	7	Up-regulated
Sus_scrofa___RNF181	1.29895	1.577	13.8205	0.000989641	0.0297489	3	7	Up-regulated
Sus_scrofa___ENSSSCG00000033465	1.69768	-1.3872	13.3241	0.000991348	0.0297489	3	7	Up-regulated
Papio_anubis_TDRD7	4.39559	-2.97433	13.3367	0.00099145	0.0297489	3	7	Up-regulated
pCMV_____gp66	6.52257	-2.6037	19.8431	0.000991502	0.0297489	3	7	Up-regulated
Papio_anubis_PPP6R3	5.22868	-2.62665	15.6244	0.000991815	0.0297489	3	7	Up-regulated
Sus_scrofa___NOX1	1.04053	1.91486	13.7985	0.000995571	0.0297771	3	7	Up-regulated
Sus_scrofa___PANX1	2.25922	1.03523	13.8197	0.000995609	0.0297771	3	7	Up-regulated
Papio_anubis_CYLD	4.88424	-2.75373	13.5177	0.000996456	0.0297771	3	7	Up-regulated
Papio_anubis_RNMT	3.40987	-2.49555	13.262	0.00100405	0.0299761	3	7	Up-regulated
Papio_anubis_ENAH	2.64451	-1.69671	12.9033	0.00101983	0.0302229	3	7	Up-regulated
Sus_scrofa___ENSSSCG00000021977	1.15399	6.98429	13.7176	0.00102206	0.0302614	3	7	Up-regulated
Sus_scrofa___IER5	1.45398	3.64417	13.7103	0.00102481	0.0302746	3	7	Up-regulated
Sus_scrofa___SAMD9	2.68438	0.0719826	13.0018	0.00102722	0.0302746	3	7	Up-regulated
Papio_anubis_RASA2	3.72732	-1.97358	14.336	0.00104119	0.0305632	3	7	Up-regulated
Papio_anubis_HECTD4	2.8059	-1.74222	12.7772	0.00104211	0.0305632	3	7	Up-regulated
Sus_scrofa___C16orf72	0.637874	6.15906	13.658	0.00104337	0.0305632	3	7	Up-regulated
Sus_scrofa___ENHO	4.02044	-2.39006	13.0276	0.001044	0.0305632	3	7	Up-regulated
Sus_scrofa___ZNF621	1.51136	0.126016	13.6737	0.00104727	0.0305856	3	7	Up-regulated
Sus_scrofa___LDHC	1.27567	2.68319	13.6241	0.00105634	0.0308225	3	7	Up-regulated
Papio_anubis_ATXN2	2.92477	-2.38151	13.0144	0.00106004	0.0309024	3	7	Up-regulated
Sus_scrofa___ARAP2	1.9986	1.36437	13.613	0.0010688	0.0310454	3	7	Up-regulated
Sus_scrofa___PRKCA	0.879868	6.93488	13.5722	0.00107489	0.0311942	3	7	Up-regulated
Sus_scrofa___SNX25	0.873276	5.25056	13.5633	0.00107823	0.0312628	3	7	Up-regulated
Papio_anubis_COPA	4.62659	-2.37548	14.3726	0.00107991	0.0312833	3	7	Up-regulated
pCMV_____gp68	6.86697	-2.4545	19.4898	0.00108841	0.0314684	3	7	Up-regulated
Papio_anubis_BLOC1S1	3.91447	-2.94012	14.7984	0.00108923	0.0314684	3	7	Up-regulated
Sus_scrofa___H2BC11	4.32949	-2.24149	13.0889	0.00109218	0.0315254	3	7	Up-regulated
pCMV_____gp34	6.66308	-2.53739	19.3597	0.00109869	0.0316318	3	7	Up-regulated
Papio_anubis_HBS1L	3.50149	-2.56203	13.8098	0.00111608	0.0320439	3	7	Up-regulated
Sus_scrofa___PARP12	3.2592	5.70134	13.4654	0.00111643	0.0320439	3	7	Up-regulated
Sus_scrofa___CYP2D25	3.33665	-2.33245	12.6975	0.00112156	0.0321428	3	7	Up-regulated
pCMV_____gp57	6.79194	-2.47442	19.2939	0.00112326	0.0321628	3	7	Up-regulated
Papio_anubis_PLEKHA3	3.40791	-2.4603	12.5664	0.00113039	0.0323381	3	7	Up-regulated
Sus_scrofa___RAD51B	0.944037	7.7736	13.409	0.00113775	0.0324877	3	7	Up-regulated
Sus_scrofa___ARPC2	0.969275	5.59272	13.3852	0.00114724	0.032704	3	7	Up-regulated
Sus_scrofa___ENSSSCG00000042304	2.3095	0.136346	13.3887	0.00115031	0.0327626	3	7	Up-regulated
Papio_anubis_CALU	2.38643	-1.34273	12.8282	0.00115223	0.0327627	3	7	Up-regulated
Papio_anubis_RPRD2	3.57886	-2.15234	13.5703	0.00115337	0.0327627	3	7	Up-regulated
Sus_scrofa___SNAPC2	1.50266	-0.0167031	13.3782	0.00116354	0.0329933	3	7	Up-regulated
Sus_scrofa___CHAF1A	1.66801	0.465814	13.333	0.00116575	0.033027	3	7	Up-regulated
Papio_anubis_PPM1A	2.51344	-2.37884	12.484	0.00117053	0.0331041	3	7	Up-regulated
Sus_scrofa___RIPOR1	0.667904	4.73579	13.3156	0.00117554	0.0332165	3	7	Up-regulated
Papio_anubis_MEMO1	3.62897	-2.20677	12.6152	0.00118059	0.0332481	3	7	Up-regulated
pCMV_____gp41	7.41151	-2.13819	19.1658	0.00118267	0.0332481	3	7	Up-regulated
Sus_scrofa___CPQ	1.49523	3.23148	13.2973	0.00118342	0.0332481	3	7	Up-regulated
Papio_anubis_BPTF	3.47351	-2.22157	12.994	0.00118389	0.0332481	3	7	Up-regulated
Sus_scrofa___SAP30L	1.1499	3.89354	13.2904	0.00118606	0.0332801	3	7	Up-regulated
Sus_scrofa___ATP8A2	1.2887	3.2397	13.2654	0.00119673	0.0335502	3	7	Up-regulated
Papio_anubis_PLD1	2.79057	-1.91669	12.2749	0.00119882	0.0335601	3	7	Up-regulated
Sus_scrofa___ANKRD12	0.714708	8.205	13.2587	0.00119917	0.0335601	3	7	Up-regulated
Papio_anubis_CEP350	3.00685	-1.54383	12.4326	0.0012006	0.033571	3	7	Up-regulated
Papio_anubis_LMAN1	4.74259	-2.84036	12.8295	0.00121452	0.0338886	3	7	Up-regulated
Sus_scrofa___RRAGA	1.53649	0.745922	13.2466	0.00121512	0.0338886	3	7	Up-regulated
Sus_scrofa___NYX	1.37655	2.98461	13.2143	0.00121843	0.0339516	3	7	Up-regulated
Sus_scrofa___SETDB2	0.79974	5.83492	13.2065	0.00122131	0.0340024	3	7	Up-regulated
Sus_scrofa___ABCB6	1.22752	2.61964	13.1933	0.00122781	0.0341538	3	7	Up-regulated
Sus_scrofa___ENSSSCG00000049617	1.8346	-0.410593	13.1471	0.00123888	0.0344021	3	7	Up-regulated
Sus_scrofa___ADGRB1	1.45789	3.07011	13.1353	0.00125275	0.0347273	3	7	Up-regulated
Sus_scrofa___PARD6B	1.06844	2.68162	13.1041	0.00126676	0.0350554	3	7	Up-regulated
Sus_scrofa___AVL9	0.688837	6.1189	13.0837	0.00127523	0.0352057	3	7	Up-regulated
Sus_scrofa___TARM1	1.88636	-0.78859	12.9173	0.00127585	0.0352057	3	7	Up-regulated
Sus_scrofa___ZNF280B	1.01255	1.75829	13.0834	0.00127789	0.0352057	3	7	Up-regulated
Papio_anubis_SMG1	2.5066	-0.831228	12.8576	0.00127864	0.0352057	3	7	Up-regulated
Sus_scrofa___ETV3	1.22575	3.26804	13.058	0.00128713	0.035351	3	7	Up-regulated
Sus_scrofa___RAB3B	2.24649	2.37035	13.0593	0.00129048	0.035351	3	7	Up-regulated
Papio_anubis_GXYLT1	2.23741	-1.54557	12.5272	0.0012933	0.035351	3	7	Up-regulated
Sus_scrofa___CSF1	1.74294	1.79853	13.0259	0.00130436	0.035496	3	7	Up-regulated
Sus_scrofa___DDIT4	2.30384	4.68565	13.0168	0.00130591	0.035496	3	7	Up-regulated
Sus_scrofa___AMOTL1	0.783767	5.47027	13.0153	0.0013064	0.035496	3	7	Up-regulated
Sus_scrofa___HK1	0.883656	8.42483	13.003	0.00131205	0.0355745	3	7	Up-regulated
Papio_anubis_BIRC3	4.10918	-2.61238	13.387	0.00131582	0.0356468	3	7	Up-regulated
Sus_scrofa___ENSSSCG00000032311	1.02246	3.66704	12.987	0.00131969	0.035706	3	7	Up-regulated
Papio_anubis_KIAA0232	1.64614	-0.50181	12.6978	0.00132023	0.035706	3	7	Up-regulated
Sus_scrofa___TM9SF2	0.693776	6.25264	12.9803	0.00132262	0.0357408	3	7	Up-regulated
Papio_anubis_U6-12	4.34796	-2.82947	13.5334	0.00134135	0.0361558	3	7	Up-regulated
Sus_scrofa___PSMB2	0.691397	7.03342	12.9371	0.00134299	0.0361696	3	7	Up-regulated
Sus_scrofa___DPP3	1.16305	3.14691	12.9232	0.0013501	0.0363003	3	7	Up-regulated
Papio_anubis_ENSPANG00000034481	3.06447	-0.961545	11.9717	0.00136129	0.0364794	3	7	Up-regulated
Sus_scrofa___ABHD17C	1.02498	4.95776	12.8923	0.00136452	0.0365184	3	7	Up-regulated
Sus_scrofa___KSR1	0.861252	6.38569	12.8814	0.00136975	0.0366086	3	7	Up-regulated
Sus_scrofa___ACTG2	1.91078	0.35451	12.9049	0.00137066	0.0366086	3	7	Up-regulated
Sus_scrofa___ZNF197	0.974009	2.85026	12.8736	0.00137403	0.0366682	3	7	Up-regulated
Sus_scrofa___PSMA4	0.832542	4.08712	12.8434	0.00138845	0.0369915	3	7	Up-regulated
Sus_scrofa___MYO5A	0.572713	7.30534	12.8343	0.00139286	0.0370478	3	7	Up-regulated
Papio_anubis_WDR82	2.03654	-1.81996	12.1712	0.00139736	0.0371367	3	7	Up-regulated
Papio_anubis_IWS1	5.45549	-2.51203	13.3371	0.00140393	0.0372807	3	7	Up-regulated
Sus_scrofa___FAM151B	0.868374	3.37234	12.7861	0.00141717	0.0375393	3	7	Up-regulated
Sus_scrofa___INHBA	2.50167	2.05322	12.6584	0.00142067	0.0376012	3	7	Up-regulated
Sus_scrofa___TXNIP	1.77419	8.15901	12.775	0.00142251	0.0376187	3	7	Up-regulated
Sus_scrofa___LEPROT	1.17587	2.87638	12.7599	0.00143068	0.0378037	3	7	Up-regulated
pCMV_____gp14	6.31876	-2.67567	17.743	0.00145247	0.0383381	3	7	Up-regulated
Papio_anubis_ANKIB1	2.64492	-1.84549	11.804	0.00145328	0.0383381	3	7	Up-regulated
Sus_scrofa___TRAF3	1.11386	4.43221	12.6976	0.00146233	0.0384715	3	7	Up-regulated
Sus_scrofa___SLC25A24	2.1791	2.94753	12.6988	0.00146254	0.0384715	3	7	Up-regulated
Papio_anubis_UNC50	3.20901	-2.01612	11.7706	0.0014709	0.0386436	3	7	Up-regulated
Papio_anubis_CCDC112	3.45409	-2.83947	13.0658	0.00147207	0.0386436	3	7	Up-regulated
Sus_scrofa___VPS53	0.618341	6.62581	12.6734	0.00147493	0.0386872	3	7	Up-regulated
Sus_scrofa___CDK2AP2	1.59718	0.280159	12.6996	0.00148042	0.0387681	3	7	Up-regulated
Sus_scrofa___TYRO3	2.33377	-0.32968	12.3971	0.00148551	0.0388696	3	7	Up-regulated
Sus_scrofa___GIPC1	1.17325	1.98174	12.6497	0.00148956	0.0389439	3	7	Up-regulated
Papio_anubis_RPL18A	3.78992	-2.66127	12.4054	0.00149395	0.0390262	3	7	Up-regulated
Sus_scrofa___B3GNT5	0.981805	2.14592	12.6342	0.00149756	0.0390262	3	7	Up-regulated
Sus_scrofa___CD276	0.855796	3.43145	12.6256	0.00150064	0.0390648	3	7	Up-regulated
Papio_anubis_ATP5F1E	3.73427	-2.72701	13.2244	0.00150178	0.0390648	3	7	Up-regulated
Papio_anubis_PKP4	4.39206	-2.41027	13.7883	0.00151982	0.039415	3	7	Up-regulated
Sus_scrofa___PSMD11	0.690039	5.60421	12.5756	0.00152743	0.0395742	3	7	Up-regulated
Sus_scrofa___ORAI3	1.42759	0.933018	12.5934	0.00152842	0.0395742	3	7	Up-regulated
Sus_scrofa___PLEKHO1	1.13926	2.02393	12.5504	0.00154425	0.0398563	3	7	Up-regulated
Sus_scrofa___C12orf66	1.06179	2.43432	12.5445	0.00154551	0.0398563	3	7	Up-regulated
Sus_scrofa___ENSSSCG00000031922	2.68176	-0.503851	11.8576	0.0015511	0.0399686	3	7	Up-regulated
Papio_anubis_SEC61G	4.00728	-2.70181	13.0927	0.00156753	0.0403256	3	7	Up-regulated
Sus_scrofa___CASP7	1.03772	4.39127	12.5012	0.00156872	0.0403256	3	7	Up-regulated
Papio_anubis_SPTBN1	1.95373	1.27123	12.511	0.00157328	0.0403783	3	7	Up-regulated
Sus_scrofa___ENSSSCG00000013889	2.81226	2.90316	12.489	0.00157839	0.0404512	3	7	Up-regulated
Sus_scrofa___SLC37A1	1.02565	3.37557	12.4841	0.00157863	0.0404512	3	7	Up-regulated
Papio_anubis_HUWE1	2.19546	-0.134512	12.1456	0.00158399	0.040482	3	7	Up-regulated
Sus_scrofa___KIAA1614	0.886255	4.16924	12.4725	0.00158502	0.040482	3	7	Up-regulated
Sus_scrofa___CXCL11	3.12164	-0.0911426	11.8563	0.00158517	0.040482	3	7	Up-regulated
pCMV_____gp70	6.19351	-2.72242	17.2116	0.00159378	0.0406452	3	7	Up-regulated
Sus_scrofa___ENSSSCG00000011729	0.972891	7.0039	12.4375	0.00160493	0.0408046	3	7	Up-regulated
Sus_scrofa___ANO10	0.837437	6.54421	12.4372	0.0016051	0.0408046	3	7	Up-regulated
Papio_anubis_NFAT5	2.5019	-1.10933	11.7707	0.00161039	0.0408855	3	7	Up-regulated
Sus_scrofa___C14orf119	1.34506	1.59828	12.4336	0.00161083	0.0408855	3	7	Up-regulated
Sus_scrofa___PCYOX1	1.26041	5.1164	12.4214	0.00161432	0.0409312	3	7	Up-regulated
Sus_scrofa___FAM162A	0.615287	6.85892	12.4198	0.00161517	0.0409312	3	7	Up-regulated
Sus_scrofa___BCAS4	1.06657	2.52173	12.4172	0.00161777	0.0409463	3	7	Up-regulated
Sus_scrofa___NFKBIE	1.7102	-0.696873	12.2195	0.00161831	0.0409463	3	7	Up-regulated
Sus_scrofa___C4orf46	1.81444	1.89581	12.3982	0.00163115	0.0411841	3	7	Up-regulated
Sus_scrofa___DDB1	0.750734	5.16259	12.3918	0.00163155	0.0411841	3	7	Up-regulated
Sus_scrofa___ENSSSCG00000009133	2.3613	-1.65288	11.5508	0.0016404	0.041375	3	7	Up-regulated
Sus_scrofa___NSFL1C	0.658896	5.5546	12.3702	0.00164431	0.0414412	3	7	Up-regulated
Sus_scrofa___ZFP36L1	2.27019	3.12092	12.3544	0.00165461	0.0415997	3	7	Up-regulated
Sus_scrofa___ZNF664	0.580879	7.59804	12.3509	0.00165577	0.0415997	3	7	Up-regulated
Sus_scrofa___NOTCH2	0.682548	5.67147	12.348	0.00165749	0.0416105	3	7	Up-regulated
Sus_scrofa___WDFY3	0.57899	8.0562	12.3352	0.00166515	0.0417377	3	7	Up-regulated
pCMV_____gp38	6.13925	-2.74145	16.9253	0.00167929	0.0420267	3	7	Up-regulated
Papio_anubis_EGLN1	3.39561	-2.57203	11.4947	0.00169203	0.0423125	3	7	Up-regulated
Sus_scrofa___TMEM127	0.770757	5.34101	12.2462	0.00171953	0.0427992	3	7	Up-regulated
Papio_anubis_PPP2R5E	2.49758	-0.00257744	11.9333	0.00173446	0.0430061	3	7	Up-regulated
Sus_scrofa___ENSSSCG00000038527	2.58503	-1.72607	11.3295	0.00174235	0.0431683	3	7	Up-regulated
Sus_scrofa___NDUFB7	2.02283	2.2348	12.2101	0.00174468	0.0431928	3	7	Up-regulated
Sus_scrofa___HHAT	1.26171	3.65008	12.1872	0.00175687	0.0433612	3	7	Up-regulated
Sus_scrofa___TGFBRAP1	0.726113	4.82582	12.1684	0.00176866	0.0436189	3	7	Up-regulated
Papio_anubis_TBL1XR1	2.61163	-1.72096	11.5086	0.00177099	0.0436429	3	7	Up-regulated
Sus_scrofa___NPPA	2.70539	4.45282	12.1467	0.00178294	0.0438543	3	7	Up-regulated
Sus_scrofa___SH3GLB1	0.669331	7.05427	12.1399	0.001787	0.0438543	3	7	Up-regulated
Sus_scrofa___TBC1D16	0.717666	5.5413	12.1367	0.00178911	0.0438543	3	7	Up-regulated
Sus_scrofa___GOLGA5	0.643919	4.7853	12.1212	0.00179921	0.0440683	3	7	Up-regulated
Papio_anubis_RTN4	4.57956	-3.04314	12.8407	0.0018052	0.0441477	3	7	Up-regulated
Sus_scrofa___JMJD4	0.940468	2.42057	12.1063	0.00181019	0.0442363	3	7	Up-regulated
pCMV_____gp05	6.08749	-2.75909	16.4999	0.00182376	0.0444048	3	7	Up-regulated
pCMV_____gp29	5.99694	-2.78926	16.4034	0.00183888	0.044666	3	7	Up-regulated
Sus_scrofa___GPX7	1.20523	1.69216	12.0625	0.00184164	0.0446993	3	7	Up-regulated
Sus_scrofa___NPDC1	2.23597	-1.49058	11.3921	0.00185301	0.0449075	3	7	Up-regulated
Papio_anubis_MTDH	2.76575	-1.75306	11.4033	0.0018617	0.0450504	3	7	Up-regulated
Sus_scrofa___PIWIL4	1.03304	3.33617	12.024	0.00186418	0.0450764	3	7	Up-regulated
Sus_scrofa___ENSSSCG00000013366	1.44496	5.05028	12.0199	0.00186782	0.0451306	3	7	Up-regulated
Sus_scrofa___LOXL2	1.56771	5.44376	12.0079	0.00187489	0.0452334	3	7	Up-regulated
Papio_anubis_XIRP2	4.60413	-2.98586	12.1337	0.00188378	0.0453459	3	7	Up-regulated
Sus_scrofa___TMCO1	0.685329	5.33917	11.9826	0.00189222	0.0455151	3	7	Up-regulated
Sus_scrofa___GDAP1	1.58949	0.859055	11.9974	0.00189853	0.0456328	3	7	Up-regulated
Sus_scrofa___KLF6	1.44802	6.02943	11.9627	0.00190597	0.0457626	3	7	Up-regulated
Papio_anubis_RBX1	3.23551	-2.5628	11.6021	0.0019125	0.0458105	3	7	Up-regulated
Papio_anubis_PSMB4	3.0573	-2.86119	11.4436	0.00193178	0.0461691	3	7	Up-regulated
Papio_anubis_DHX9	4.13076	-2.83292	12.4349	0.00193281	0.0461691	3	7	Up-regulated
Papio_anubis_CANX	3.75063	-2.40984	11.7496	0.00193375	0.0461691	3	7	Up-regulated
Sus_scrofa___MARCHF8	0.794771	7.46599	11.9169	0.0019381	0.0462269	3	7	Up-regulated
Papio_anubis_RBBP6	2.54789	-2.02407	11.1321	0.00194316	0.0462906	3	7	Up-regulated
Sus_scrofa___ZNF292	0.645646	8.03899	11.9039	0.0019473	0.0463306	3	7	Up-regulated
Papio_anubis_ATG2B	2.58095	-2.09974	11.485	0.00194836	0.0463306	3	7	Up-regulated
Papio_anubis_ATP5MC1	2.47538	-0.887791	11.9157	0.0019495	0.0463306	3	7	Up-regulated
Sus_scrofa___BNIP3L	0.842283	5.28874	11.8994	0.00195059	0.0463306	3	7	Up-regulated
Sus_scrofa___PJA1	1.25215	1.76991	11.8995	0.00195357	0.0463669	3	7	Up-regulated
Sus_scrofa___TTC12	1.26173	2.4161	11.8928	0.00195648	0.0464019	3	7	Up-regulated
pCMV_____gp27	5.97077	-2.79811	16.0908	0.00195926	0.0464336	3	7	Up-regulated
Papio_anubis_SMAP1	2.13255	-1.1387	11.5819	0.00196894	0.0465984	3	7	Up-regulated
pCMV_____gp79	6.78931	-2.5005	16.442	0.00196911	0.0465984	3	7	Up-regulated
Papio_anubis_HBB	3.39067	-1.49261	11.1235	0.0019766	0.046707	3	7	Up-regulated
Sus_scrofa___ADAMTS2	2.12297	1.33363	11.8739	0.00197887	0.0467264	3	7	Up-regulated
Sus_scrofa___ARHGEF3	1.35191	6.50916	11.8414	0.00199235	0.0469757	3	7	Up-regulated
Papio_anubis_ALG13	1.99883	-2.03159	11.0169	0.00200382	0.0472115	3	7	Up-regulated
Sus_scrofa___SMURF1	1.00052	6.01191	11.8221	0.00200649	0.0472398	3	7	Up-regulated
Sus_scrofa___GCNT4	1.92291	0.320599	11.8485	0.0020083	0.0472479	3	7	Up-regulated
pCMV_____gp78	6.66679	-2.54156	14.6129	0.00203211	0.0476979	3	7	Up-regulated
Papio_anubis_HSD17B12	4.39559	-2.57747	11.8768	0.00203466	0.0476979	3	7	Up-regulated
Sus_scrofa___PDE12	1.30896	1.94063	11.7875	0.00203484	0.0476979	3	7	Up-regulated
Sus_scrofa___CCDC195	2.89945	-1.9875	11.0521	0.00204041	0.0477589	3	7	Up-regulated
pCMV_____gp42	6.6157	-2.56952	16.1731	0.00205927	0.0480926	3	7	Up-regulated
Papio_anubis_ENSPANG00000031934	2.60606	-2.09411	10.8847	0.00206513	0.0480926	3	7	Up-regulated
Papio_anubis_SLC30A9	3.53462	-2.71561	11.6658	0.00206517	0.0480926	3	7	Up-regulated
Sus_scrofa___ATXN3L	0.769711	5.20931	11.7427	0.00206585	0.0480926	3	7	Up-regulated
Papio_anubis_GSK3B	2.97742	-2.31082	11.2701	0.00206662	0.0480926	3	7	Up-regulated
Papio_anubis_PRPF40A	1.71214	-0.494914	11.6335	0.00206878	0.0481082	3	7	Up-regulated
Sus_scrofa___DES	1.29347	8.84275	11.7279	0.00207708	0.0482507	3	7	Up-regulated
Sus_scrofa___VMP1	0.770463	7.16162	11.7169	0.00208547	0.0483912	3	7	Up-regulated
Papio_anubis_SNRPA1	4.37547	-2.97955	12.1915	0.00208791	0.0484113	3	7	Up-regulated
pCMV_____gp18	6.2204	-2.71134	15.9369	0.00208934	0.0484113	3	7	Up-regulated
Sus_scrofa___DOCK1	0.561377	8.85811	11.7084	0.00209204	0.048439	3	7	Up-regulated
Papio_anubis_ENSPANG00000012133	3.48449	-2.62909	11.0208	0.00210372	0.0486299	3	7	Up-regulated
Sus_scrofa___ENSSSCG00000031288	1.02815	3.20236	11.6925	0.00210482	0.0486299	3	7	Up-regulated
Papio_anubis_TLK1	3.02442	-1.39094	10.9557	0.00210926	0.0486976	3	7	Up-regulated
Sus_scrofa___ZFP36	2.34564	4.47747	11.6788	0.00211513	0.0487981	3	7	Up-regulated
Sus_scrofa___SYAP1	0.9383	5.25138	11.6587	0.00213063	0.0491204	3	7	Up-regulated
Sus_scrofa___RBMX2	0.994383	2.17782	11.6495	0.00213983	0.0492599	3	7	Up-regulated
Sus_scrofa___TMED10	0.732408	5.65513	11.6432	0.0021428	0.0492599	3	7	Up-regulated
Sus_scrofa___EPSTI1	3.21719	6.3156	11.6329	0.0021511	0.0493449	3	7	Up-regulated
Sus_scrofa___TAMM41	0.852022	4.03555	11.6268	0.00215594	0.0493857	3	7	Up-regulated
Sus_scrofa___ENSSSCG00000003080	2.23413	-0.254282	11.5803	0.00217266	0.0496626	3	7	Up-regulated
Sus_scrofa___NHLRC3	0.627424	8.13315	11.5849	0.00218939	0.0499073	3	7	Up-regulated
Sus_scrofa___CENPJ	0.898158	2.60431	11.5803	0.00219422	0.0499073	3	7	Up-regulated
Sus_scrofa___ADAMTSL1	-2.79402	7.78549	60.7362	3.13049e-08	3.91913e-05	3	7	Down-regulated
Sus_scrofa___DAPL1	-3.81991	4.57688	55.845	6.73736e-08	6.05328e-05	3	7	Down-regulated
Sus_scrofa___ENSSSCG00000036052	-1.90022	9.38483	49.518	1.92257e-07	0.000128908	3	7	Down-regulated
Sus_scrofa___ENSSSCG00000038605	-4.61295	3.24062	47.7034	2.50236e-07	0.000146429	3	7	Down-regulated
Sus_scrofa___RNF207	-2.20355	6.57666	47.3752	2.80631e-07	0.000160477	3	7	Down-regulated
Sus_scrofa___ZBTB7C	-3.25266	5.33014	43.9662	5.25061e-07	0.000248508	3	7	Down-regulated
Sus_scrofa___ENOX1	-2.7862	9.37575	37.9775	1.7072e-06	0.000566439	3	7	Down-regulated
Sus_scrofa___MYLIP	-2.20476	4.73429	37.898	1.7362e-06	0.000570181	3	7	Down-regulated
Sus_scrofa___ENSSSCG00000039326	-4.42429	0.570618	36.3168	1.8897e-06	0.000596257	3	7	Down-regulated
Sus_scrofa___JADE1	-1.92006	8.40923	36.9223	2.12679e-06	0.000638994	3	7	Down-regulated
Sus_scrofa___MYLK3	-1.53686	8.61558	36.8133	2.17613e-06	0.000638994	3	7	Down-regulated
Sus_scrofa___ACTC1	-4.47843	7.83393	34.3095	3.72772e-06	0.000882154	3	7	Down-regulated
Sus_scrofa___ADRA1A	-3.89513	6.54057	33.7176	4.24938e-06	0.000956377	3	7	Down-regulated
Sus_scrofa___ACOT11	-2.54976	8.21373	33.5012	4.45731e-06	0.000989339	3	7	Down-regulated
Sus_scrofa___CRYBG3	-2.13551	10.2972	32.6563	5.38778e-06	0.00113333	3	7	Down-regulated
Sus_scrofa___PTN	-3.40728	2.35675	32.5035	5.49544e-06	0.00114847	3	7	Down-regulated
Sus_scrofa___CACNA1D	-1.48829	5.05712	31.9748	6.29212e-06	0.00127608	3	7	Down-regulated
Sus_scrofa___NASP	-1.21638	5.09975	31.4596	7.08331e-06	0.00138163	3	7	Down-regulated
Sus_scrofa___SLC66A2	-1.23308	6.21206	31.3907	7.19668e-06	0.00139529	3	7	Down-regulated
Sus_scrofa___ENSSSCG00000012700	-1.48867	6.92516	30.4848	8.89008e-06	0.00159843	3	7	Down-regulated
Sus_scrofa___SMTN	-1.937	5.57447	29.7102	1.06826e-05	0.00181595	3	7	Down-regulated
Sus_scrofa___ENSSSCG00000048752	-2.55796	4.22325	29.7094	1.06946e-05	0.00181595	3	7	Down-regulated
Sus_scrofa___PRKCG	-4.02698	3.634	29.5507	1.1008e-05	0.00183565	3	7	Down-regulated
Sus_scrofa___MYBPC3	-1.60309	10.8563	29.2801	1.18415e-05	0.00194113	3	7	Down-regulated
Sus_scrofa___TMEM52B	-2.20763	4.5208	29.2462	1.19421e-05	0.00194113	3	7	Down-regulated
Sus_scrofa___ENSSSCG00000045296	-2.95918	3.16783	29.2123	1.20882e-05	0.00195501	3	7	Down-regulated
Sus_scrofa___ENSSSCG00000006213	-1.38114	4.73048	27.8454	1.68088e-05	0.0024259	3	7	Down-regulated
Sus_scrofa___FAM160A2	-1.5845	4.00979	27.5933	1.78971e-05	0.00253744	3	7	Down-regulated
Sus_scrofa___ISM1	-3.75261	4.80013	27.5197	1.82367e-05	0.00256302	3	7	Down-regulated
Sus_scrofa___RIBC1	-2.09072	2.79558	27.4304	1.87031e-05	0.0026058	3	7	Down-regulated
Sus_scrofa___GRM5	-3.72727	6.06542	27.266	1.9416e-05	0.0026661	3	7	Down-regulated
Sus_scrofa___GFRA1	-2.22735	2.01161	27.2272	1.97049e-05	0.00267588	3	7	Down-regulated
Sus_scrofa___ZDHHC8	-2.34419	3.02813	26.8118	2.18517e-05	0.00291816	3	7	Down-regulated
Sus_scrofa___ADAMTS6	-2.23688	8.49329	26.7737	2.19731e-05	0.00292224	3	7	Down-regulated
Sus_scrofa___ROS1	-3.71475	3.72122	26.5819	2.31426e-05	0.00302498	3	7	Down-regulated
Sus_scrofa___ENSSSCG00000039552	-3.59188	4.0167	26.3601	2.44779e-05	0.00315118	3	7	Down-regulated
Sus_scrofa___SH3KBP1	-1.53396	5.83373	25.9744	2.69393e-05	0.00338678	3	7	Down-regulated
Sus_scrofa___ENSSSCG00000037140	-2.11569	4.99287	25.8286	2.79738e-05	0.00344946	3	7	Down-regulated
Sus_scrofa___CDH9	-4.1869	5.01908	25.617	2.96104e-05	0.00358241	3	7	Down-regulated
Sus_scrofa___ENSSSCG00000041764	-1.17261	8.14596	25.5936	2.97198e-05	0.00358241	3	7	Down-regulated
Sus_scrofa___ENSSSCG00000015036	-1.60096	4.13314	25.3499	3.16726e-05	0.00377537	3	7	Down-regulated
Sus_scrofa___MYOCD	-1.33694	10.642	25.1128	3.36825e-05	0.00394196	3	7	Down-regulated
Sus_scrofa___MMP11	-2.95863	6.58072	25.0412	3.43213e-05	0.00400217	3	7	Down-regulated
Sus_scrofa___NAALADL2	-1.52795	7.38387	24.881	3.57934e-05	0.00411577	3	7	Down-regulated
Sus_scrofa___PDLIM7	-1.30044	6.91407	24.804	3.65268e-05	0.00415399	3	7	Down-regulated
Sus_scrofa___GPR137C	-2.00594	8.15247	24.788	3.66808e-05	0.00415681	3	7	Down-regulated
Sus_scrofa___CCDC141	-1.23005	10.2254	24.6109	3.84356e-05	0.00430025	3	7	Down-regulated
Sus_scrofa___ASB12	-3.55546	0.122909	23.597	4.08233e-05	0.00445862	3	7	Down-regulated
Sus_scrofa___SEMA4C	-1.95236	1.52346	24.3594	4.1055e-05	0.00446389	3	7	Down-regulated
Sus_scrofa___PLXNC1	-1.41398	3.85162	24.2811	4.1964e-05	0.00448847	3	7	Down-regulated
Sus_scrofa___MTSS2	-1.26304	5.58431	24.0542	4.45707e-05	0.0046874	3	7	Down-regulated
Papio_anubis_TPM2	-2.56209	3.42862	24.0508	4.47126e-05	0.0046874	3	7	Down-regulated
Sus_scrofa___ENSSSCG00000043152	-2.39442	1.20014	23.9165	4.54451e-05	0.00470445	3	7	Down-regulated
Sus_scrofa___LRCH2	-1.41846	5.25282	23.884	4.6652e-05	0.00472153	3	7	Down-regulated
Sus_scrofa___TPST2	-1.46436	4.99673	23.8618	4.69335e-05	0.00473513	3	7	Down-regulated
Sus_scrofa___SLC38A3	-2.24938	2.76648	23.8173	4.76687e-05	0.00474975	3	7	Down-regulated
Sus_scrofa___ASB14	-2.42686	3.82886	23.6063	5.03347e-05	0.00495404	3	7	Down-regulated
Sus_scrofa___ENSSSCG00000031608	-1.53848	8.69972	23.542	5.11547e-05	0.00500733	3	7	Down-regulated
Sus_scrofa___PCDH17	-4.95106	-1.08417	21.8496	5.11873e-05	0.00500733	3	7	Down-regulated
Sus_scrofa___TRIP6	-1.68276	2.33834	23.3517	5.40908e-05	0.00518113	3	7	Down-regulated
Sus_scrofa___ENSSSCG00000049978	-3.53966	1.73919	23.2096	5.44985e-05	0.00520469	3	7	Down-regulated
Sus_scrofa___KCND3	-2.39511	5.45704	23.2931	5.47387e-05	0.00521216	3	7	Down-regulated
Sus_scrofa___MAML3	-1.68399	7.51727	23.2758	5.49873e-05	0.00521698	3	7	Down-regulated
Sus_scrofa___AASS	-2.73862	5.29798	23.2462	5.54377e-05	0.00521698	3	7	Down-regulated
Sus_scrofa___CLRN1	-2.80955	0.580585	22.5953	6.0585e-05	0.00560588	3	7	Down-regulated
Sus_scrofa___EPHA1	-2.67894	0.541311	22.575	6.25287e-05	0.00571385	3	7	Down-regulated
Sus_scrofa___ADAMTS18	-1.67976	4.63376	22.7512	6.34838e-05	0.00574853	3	7	Down-regulated
Sus_scrofa___HSD17B10	-2.16706	0.98092	22.6607	6.37316e-05	0.00574853	3	7	Down-regulated
Sus_scrofa___ENSSSCG00000010310	-1.31552	3.32067	22.6676	6.5012e-05	0.00577996	3	7	Down-regulated
Papio_anubis_ENSPANG00000029693	-1.78451	1.66019	22.5845	6.68727e-05	0.00591272	3	7	Down-regulated
Sus_scrofa___ENSSSCG00000047384	-2.84011	1.80028	22.4018	6.92332e-05	0.00602216	3	7	Down-regulated
Sus_scrofa___RPL22	-1.40996	6.54652	22.2708	7.25031e-05	0.0062225	3	7	Down-regulated
Sus_scrofa___HOMER1	-1.3253	9.18022	21.9988	7.82215e-05	0.00653891	3	7	Down-regulated
Sus_scrofa___SMPD4	-0.964269	4.63812	21.8835	8.07993e-05	0.00666781	3	7	Down-regulated
Sus_scrofa___CPXM2	-1.99247	3.25523	21.6923	8.54293e-05	0.00689087	3	7	Down-regulated
Sus_scrofa___TRIM9	-1.59369	1.65994	21.5235	8.99324e-05	0.00714663	3	7	Down-regulated
Sus_scrofa___ENSSSCG00000035525	-1.60518	2.75912	21.4876	9.05253e-05	0.00717603	3	7	Down-regulated
Sus_scrofa___RGS7BP	-1.27096	6.70413	21.4605	9.10295e-05	0.00718921	3	7	Down-regulated
Sus_scrofa___GFM1	-1.05389	8.29302	21.4132	9.22561e-05	0.00725159	3	7	Down-regulated
Sus_scrofa___FER1L6	-1.85155	5.20355	21.2454	9.67686e-05	0.00748654	3	7	Down-regulated
Sus_scrofa___PRKAG3	-1.85618	4.22239	21.2049	9.79159e-05	0.00753906	3	7	Down-regulated
Sus_scrofa___MRAS	-1.2668	7.69058	21.026	0.000103021	0.00781986	3	7	Down-regulated
Sus_scrofa___ELL3	-2.84914	0.556252	20.5953	0.00010406	0.00783298	3	7	Down-regulated
Sus_scrofa___TPM2	-1.55584	9.90141	20.9873	0.000104167	0.00783298	3	7	Down-regulated
Sus_scrofa___INSC	-1.91415	3.84598	20.9041	0.000106763	0.00795383	3	7	Down-regulated
Sus_scrofa___ENSSSCG00000003781	-3.54281	3.15731	20.8307	0.000109037	0.00805477	3	7	Down-regulated
Sus_scrofa___ENSSSCG00000047860	-1.41196	4.57982	20.7673	0.000110975	0.00809047	3	7	Down-regulated
Sus_scrofa___FCGR1A	-2.47247	2.99145	20.7769	0.000110993	0.00809047	3	7	Down-regulated
Sus_scrofa___CEP126	-1.11661	7.69161	20.7415	0.000111791	0.00809047	3	7	Down-regulated
Sus_scrofa___SLC51A	-2.59333	1.18714	20.5534	0.000115903	0.00831105	3	7	Down-regulated
Sus_scrofa___ENSSSCG00000049530	-3.03389	3.4264	20.609	0.000116457	0.00832898	3	7	Down-regulated
Sus_scrofa___TBX20	-1.21423	7.77602	20.5628	0.000117711	0.00840001	3	7	Down-regulated
Sus_scrofa___SLC24A4	-1.25442	4.4624	20.5434	0.00011839	0.00842982	3	7	Down-regulated
Sus_scrofa___GRB14	-1.20622	6.91226	20.516	0.000119317	0.00847706	3	7	Down-regulated
Sus_scrofa___ENSSSCG00000048278	-1.96028	3.21019	20.5015	0.000119968	0.00848585	3	7	Down-regulated
Sus_scrofa___ENSSSCG00000049352	-4.20682	-1.57932	19.3984	0.00012069	0.00850117	3	7	Down-regulated
Sus_scrofa___ENSSSCG00000011676	-1.81227	6.49229	20.4537	0.000121492	0.00850613	3	7	Down-regulated
Sus_scrofa___RAMP1	-1.07384	7.97616	20.4513	0.000121577	0.00850613	3	7	Down-regulated
Sus_scrofa___ITGA1	-3.11528	3.32315	20.4258	0.000122791	0.00853682	3	7	Down-regulated
Sus_scrofa___ENSSSCG00000043698	-2.05815	-0.202751	20.1447	0.000123592	0.00855419	3	7	Down-regulated
Sus_scrofa___CA14	-2.38574	4.57101	20.3293	0.000126001	0.00865795	3	7	Down-regulated
Sus_scrofa___CMTM5	-3.20089	6.9827	20.2909	0.00012738	0.00872252	3	7	Down-regulated
Sus_scrofa___ENSSSCG00000040091	-6.65036	-0.899441	20.506	0.000135614	0.00915007	3	7	Down-regulated
Sus_scrofa___ASB15	-2.14161	7.99332	20.057	0.000136385	0.00916369	3	7	Down-regulated
Sus_scrofa___SLC2A4	-1.54156	6.10984	20.0124	0.000138181	0.00924575	3	7	Down-regulated
Sus_scrofa___RYR2	-0.98654	13.8953	19.8616	0.000144436	0.00956486	3	7	Down-regulated
Sus_scrofa___NDUFB3	-0.903248	5.91397	19.756	0.000148998	0.00982655	3	7	Down-regulated
Sus_scrofa___CCK	-2.79612	5.45656	19.7267	0.000150314	0.00987287	3	7	Down-regulated
Sus_scrofa___SLC25A29	-1.53011	6.95165	19.711	0.00015099	0.00989708	3	7	Down-regulated
Sus_scrofa___KCNIP2	-2.6699	5.32737	19.7	0.000151525	0.00991194	3	7	Down-regulated
Sus_scrofa___ENSSSCG00000051591	-3.18522	4.91631	19.683	0.000152446	0.00993978	3	7	Down-regulated
Sus_scrofa___TMEM53	-1.51754	3.34687	19.603	0.000155993	0.0101219	3	7	Down-regulated
Sus_scrofa___PREX2	-2.69447	3.12847	19.5817	0.000157192	0.0101588	3	7	Down-regulated
Sus_scrofa___GBA2	-1.02936	5.6908	19.5634	0.00015773	0.0101731	3	7	Down-regulated
Sus_scrofa___SLC9B2	-1.42677	9.00227	19.5156	0.000159978	0.0102565	3	7	Down-regulated
Sus_scrofa___CXCR5	-3.538	-0.292142	18.9741	0.00016907	0.0105142	3	7	Down-regulated
Sus_scrofa___PEX5L	-2.13591	5.608	19.3078	0.000170186	0.0105142	3	7	Down-regulated
Sus_scrofa___SRSF5	-1.12658	7.42679	19.2858	0.000171298	0.0105614	3	7	Down-regulated
Sus_scrofa___ENSSSCG00000035617	-1.79347	6.24946	19.2553	0.000172871	0.0105975	3	7	Down-regulated
Sus_scrofa___WDR90	-1.78695	0.726308	19.1802	0.000176812	0.0107368	3	7	Down-regulated
Sus_scrofa___SIPA1L2	-1.11321	8.78336	19.1634	0.000177682	0.0107693	3	7	Down-regulated
Papio_anubis_RBFOX1	-2.59004	0.275521	18.7053	0.000180465	0.0108562	3	7	Down-regulated
Sus_scrofa___ENSSSCG00000047475	-2.40681	3.36625	19.0587	0.00018364	0.0109856	3	7	Down-regulated
Sus_scrofa___ENSSSCG00000013530	-1.85956	3.58797	19.0469	0.000184106	0.0109931	3	7	Down-regulated
Sus_scrofa___LDHD	-2.28407	1.76056	19.008	0.000186262	0.0110771	3	7	Down-regulated
Sus_scrofa___SLC9A5	-2.0402	1.69944	18.9618	0.000187923	0.0111179	3	7	Down-regulated
Sus_scrofa___CD302	-1.83216	2.67611	18.8676	0.000194558	0.0114682	3	7	Down-regulated
Sus_scrofa___PAXBP1	-0.823468	7.61481	18.7435	0.000201598	0.0116905	3	7	Down-regulated
Sus_scrofa___ENSSSCG00000014368	-2.1096	1.35242	18.6332	0.000207021	0.011896	3	7	Down-regulated
Sus_scrofa___HJV	-4.26373	1.10394	18.2584	0.000207359	0.011896	3	7	Down-regulated
Sus_scrofa___ENSSSCG00000051631	-4.97666	-1.89862	17.9025	0.000213111	0.012161	3	7	Down-regulated
Sus_scrofa___GNPDA2	-0.98546	7.19843	18.5076	0.000216547	0.012309	3	7	Down-regulated
Sus_scrofa___ADAM9	-1.06473	5.57931	18.503	0.000216852	0.012309	3	7	Down-regulated
Sus_scrofa___ENSSSCG00000012049	-1.58848	5.83596	18.4145	0.000222776	0.0125566	3	7	Down-regulated
Sus_scrofa___ENSSSCG00000043491	-5.52899	-1.92475	18.1419	0.000224624	0.0126166	3	7	Down-regulated
Sus_scrofa___ERICH4	-2.51621	1.47136	18.1991	0.000234542	0.0130597	3	7	Down-regulated
Sus_scrofa___ASPN	-2.19928	6.07284	18.2164	0.000236673	0.0130638	3	7	Down-regulated
Sus_scrofa___ENSSSCG00000049101	-2.1653	2.41188	18.2197	0.000237105	0.0130638	3	7	Down-regulated
Sus_scrofa___ENSSSCG00000041499	-3.31585	4.54426	18.1997	0.000238269	0.0130638	3	7	Down-regulated
Sus_scrofa___FHL2	-1.57667	11.4068	18.177	0.000239544	0.0130823	3	7	Down-regulated
Sus_scrofa___ENSSSCG00000049945	-3.02516	0.188172	17.7005	0.000239825	0.0130823	3	7	Down-regulated
Sus_scrofa___OBSL1	-1.11937	5.23925	18.1316	0.000242912	0.0131298	3	7	Down-regulated
Sus_scrofa___IL2RA	-1.7074	1.03031	18.1393	0.000243144	0.0131298	3	7	Down-regulated
Sus_scrofa___AUTS2	-1.47898	8.83201	18.069	0.000247623	0.0133046	3	7	Down-regulated
Sus_scrofa___ENSSSCG00000044044	-2.43449	1.14708	17.9626	0.000252395	0.0134991	3	7	Down-regulated
Sus_scrofa___MTARC2	-0.972588	7.00159	17.9221	0.00025908	0.0137368	3	7	Down-regulated
Sus_scrofa___TENM2	-2.25568	10.3287	17.8634	0.00026382	0.0138651	3	7	Down-regulated
Sus_scrofa___STXBP6	-1.55921	8.19635	17.7967	0.000269318	0.0141145	3	7	Down-regulated
Sus_scrofa___ENSSSCG00000051032	-2.56917	0.671848	17.6835	0.000269713	0.0141145	3	7	Down-regulated
Sus_scrofa___FAM135B	-1.20246	2.26269	17.7943	0.000270167	0.0141153	3	7	Down-regulated
Sus_scrofa___TXNDC16	-1.08687	7.2414	17.73	0.000274945	0.0141302	3	7	Down-regulated
Sus_scrofa___ENSSSCG00000044774	-3.26407	3.58079	17.733	0.00027528	0.0141302	3	7	Down-regulated
Sus_scrofa___EPHA7	-1.52022	6.86114	17.6947	0.000277974	0.0142231	3	7	Down-regulated
Sus_scrofa___ENSSSCG00000048970	-4.05832	-0.0702118	17.3739	0.000279951	0.0142788	3	7	Down-regulated
Sus_scrofa___WNK2	-1.19337	8.24152	17.6609	0.000280902	0.014282	3	7	Down-regulated
Sus_scrofa___RBFOX1	-1.08766	9.56186	17.6492	0.000281926	0.014282	3	7	Down-regulated
Sus_scrofa___ENSSSCG00000045756	-2.49246	-0.272801	17.3328	0.000283699	0.0143112	3	7	Down-regulated
Sus_scrofa___CHN1	-1.01471	8.13554	17.6178	0.000284692	0.0143389	3	7	Down-regulated
Sus_scrofa___ENSSSCG00000047013	-2.97988	0.0529972	17.2836	0.000288283	0.0144006	3	7	Down-regulated
Sus_scrofa___ENSSSCG00000051373	-3.03309	-1.13088	17.1627	0.000288603	0.0144006	3	7	Down-regulated
Sus_scrofa___HDAC6	-0.981563	5.21428	17.5502	0.00029075	0.0144853	3	7	Down-regulated
Sus_scrofa___WSCD2	-2.82262	5.33436	17.4626	0.000298829	0.0147735	3	7	Down-regulated
Sus_scrofa___PDE4D	-1.04697	13.4259	17.4339	0.000301487	0.0148532	3	7	Down-regulated
Sus_scrofa___ENSSSCG00000033787	-2.11665	0.548757	17.3196	0.000302287	0.0148532	3	7	Down-regulated
Sus_scrofa___CCDC173	-1.36069	3.26543	17.4215	0.000302821	0.0148567	3	7	Down-regulated
Sus_scrofa___ASB11	-2.07872	4.9301	17.3817	0.0003065	0.0149687	3	7	Down-regulated
Sus_scrofa___ALX4	-2.50764	-0.395077	17.0185	0.000311561	0.0151241	3	7	Down-regulated
Sus_scrofa___PIGQ	-1.11037	5.30832	17.3052	0.000313893	0.0151915	3	7	Down-regulated
Sus_scrofa___TMEM120B	-1.16341	7.01914	17.2868	0.000315698	0.0152222	3	7	Down-regulated
Sus_scrofa___ENSSSCG00000050585	-2.03599	3.16727	17.2794	0.000316934	0.0152222	3	7	Down-regulated
Sus_scrofa___ENSSSCG00000049911	-5.91049	-1.75638	16.906	0.000317351	0.0152222	3	7	Down-regulated
Sus_scrofa___ENSSSCG00000044453	-2.78155	3.59016	17.2119	0.000323641	0.0154771	3	7	Down-regulated
Sus_scrofa___TRPC7	-1.27075	1.82474	17.1699	0.000328563	0.0156427	3	7	Down-regulated
Sus_scrofa___ENSSSCG00000038786	-2.00989	2.02232	17.1397	0.000331807	0.0157333	3	7	Down-regulated
Sus_scrofa___ENSSSCG00000044598	-2.83111	-0.892861	16.6903	0.00033283	0.0157333	3	7	Down-regulated
Sus_scrofa___BTNL2	-4.49753	-2.33349	15.7923	0.000333566	0.0157412	3	7	Down-regulated
Sus_scrofa___TINAG	-4.12699	4.12898	17.0662	0.000337679	0.0158424	3	7	Down-regulated
Sus_scrofa___ENSSSCG00000046860	-3.67096	-0.76245	16.3132	0.000341188	0.0159802	3	7	Down-regulated
Sus_scrofa___ABCA1	-1.96767	6.96347	17.0183	0.000343533	0.0160236	3	7	Down-regulated
Sus_scrofa___RASGRP2	-2.52209	2.03505	16.9809	0.000346894	0.0161336	3	7	Down-regulated
Sus_scrofa___KIFC2	-2.32802	0.878045	16.8578	0.00035218	0.0163087	3	7	Down-regulated
Sus_scrofa___TPGS2	-1.41475	5.18356	16.8454	0.000362871	0.016626	3	7	Down-regulated
Sus_scrofa___GAPDHS	-2.45044	1.1213	16.7761	0.000363595	0.016626	3	7	Down-regulated
Sus_scrofa___LMO7	-1.09951	9.79732	16.8383	0.00036368	0.016626	3	7	Down-regulated
Sus_scrofa___PRKAG1	-1.03246	4.18483	16.8228	0.000365525	0.0166866	3	7	Down-regulated
Sus_scrofa___ENSSSCG00000011344	-2.48257	0.590504	16.6964	0.000368127	0.0167206	3	7	Down-regulated
Sus_scrofa___C21orf91	-1.36051	6.06157	16.7735	0.000371245	0.0167764	3	7	Down-regulated
Sus_scrofa___CYP2C42	-1.37995	4.13576	16.766	0.000372183	0.0167764	3	7	Down-regulated
Sus_scrofa___MRPL46	-0.999847	3.94709	16.7515	0.000373921	0.0168312	3	7	Down-regulated
Sus_scrofa___ENSSSCG00000031075	-2.93013	3.04332	16.7418	0.000375653	0.0168698	3	7	Down-regulated
Sus_scrofa___ENSSSCG00000043205	-2.94273	2.6927	16.7348	0.000376876	0.0168698	3	7	Down-regulated
Sus_scrofa___AIF1	-2.84061	0.174122	16.3653	0.000379908	0.0169353	3	7	Down-regulated
Sus_scrofa___PLSCR3	-1.62639	1.92735	16.6283	0.000390139	0.0172239	3	7	Down-regulated
Sus_scrofa___CCR9	-1.81429	1.05512	16.6034	0.000391303	0.0172469	3	7	Down-regulated
Sus_scrofa___PLEK	-1.39882	3.0568	16.5899	0.000393889	0.0172469	3	7	Down-regulated
Sus_scrofa___RUFY1	-0.824172	6.96488	16.5795	0.000394916	0.0172469	3	7	Down-regulated
Sus_scrofa___FRMD7	-1.50408	1.23977	16.5809	0.000395937	0.0172469	3	7	Down-regulated
Sus_scrofa___ENSSSCG00000044539	-2.39943	4.35593	16.5714	0.000396035	0.0172469	3	7	Down-regulated
Sus_scrofa___PLEKHM3	-1.03472	8.30757	16.5509	0.000398533	0.0172932	3	7	Down-regulated
Sus_scrofa___ZRANB2	-0.899317	8.32511	16.5164	0.000402954	0.0173843	3	7	Down-regulated
Sus_scrofa___FAM166B	-3.66083	-0.0707643	16.2168	0.000405411	0.0174435	3	7	Down-regulated
Sus_scrofa___ENPP1	-1.40126	7.58935	16.4807	0.000407587	0.0174904	3	7	Down-regulated
Sus_scrofa___IRGC	-2.26417	-0.207278	16.1758	0.000416143	0.0177219	3	7	Down-regulated
Sus_scrofa___CORIN	-1.51679	9.76649	16.398	0.000418545	0.0177945	3	7	Down-regulated
Sus_scrofa___TLCD3B	-2.04886	2.3682	16.377	0.00042211	0.0179224	3	7	Down-regulated
Sus_scrofa___ELP1	-0.754681	5.46147	16.3592	0.000423797	0.0179703	3	7	Down-regulated
Sus_scrofa___STUM	-2.56354	-0.136518	15.8693	0.000425416	0.0179916	3	7	Down-regulated
Sus_scrofa___LAMB2	-1.55409	4.36852	16.306	0.000431188	0.0181166	3	7	Down-regulated
Sus_scrofa___ENSSSCG00000037500	-3.22782	-0.664963	15.9632	0.000437893	0.0183505	3	7	Down-regulated
Sus_scrofa___ASPDH	-1.79203	11.049	16.2415	0.00044015	0.018385	3	7	Down-regulated
Sus_scrofa___ANKRD50	-1.38372	5.98184	16.2355	0.000441007	0.018385	3	7	Down-regulated
Sus_scrofa___ENSSSCG00000037566	-3.22325	-1.11075	15.2112	0.000443555	0.0184193	3	7	Down-regulated
Sus_scrofa___ATP10D	-1.6693	5.61547	16.1954	0.00044676	0.0184376	3	7	Down-regulated
Sus_scrofa___ENSSSCG00000029080	-3.02645	-0.442333	15.8924	0.000446846	0.0184376	3	7	Down-regulated
Sus_scrofa___ENSSSCG00000042384	-3.10462	-0.659795	15.8682	0.000449631	0.018505	3	7	Down-regulated
Sus_scrofa___SRF	-1.27757	4.57259	16.1501	0.000453365	0.0185916	3	7	Down-regulated
Sus_scrofa___USP11	-0.792828	4.4596	16.1273	0.000456713	0.0186375	3	7	Down-regulated
Sus_scrofa___ZNF483	-1.72358	3.17134	16.1177	0.000458605	0.0186832	3	7	Down-regulated
Sus_scrofa___ENSSSCG00000033464	-3.85576	-1.02904	15.5548	0.000460797	0.0187288	3	7	Down-regulated
Sus_scrofa___PTPN4	-0.975375	9.35771	16.0667	0.000465737	0.0188782	3	7	Down-regulated
Sus_scrofa___SEMA3C	-1.27802	9.03332	16.0284	0.000471553	0.0190341	3	7	Down-regulated
Sus_scrofa___GRIP2	-2.66657	5.49973	16.0221	0.000472541	0.0190341	3	7	Down-regulated
Sus_scrofa___RNF11	-0.881285	6.74376	16.017	0.000473292	0.0190406	3	7	Down-regulated
Sus_scrofa___UQCRQ	-1.40106	6.49743	16.0094	0.000474471	0.0190535	3	7	Down-regulated
Sus_scrofa___ENSSSCG00000045412	-2.51892	4.36214	16.0079	0.000474799	0.0190535	3	7	Down-regulated
Sus_scrofa___ENSSSCG00000046137	-2.05757	-0.436027	15.7301	0.000477418	0.0191236	3	7	Down-regulated
Sus_scrofa___ENSSSCG00000047064	-2.0585	1.21871	15.9044	0.000489957	0.0195158	3	7	Down-regulated
Sus_scrofa___NCF1	-2.31291	2.36083	15.89	0.000494351	0.0196241	3	7	Down-regulated
Sus_scrofa___ZNF804B	-1.83836	9.21486	15.8783	0.000495114	0.0196241	3	7	Down-regulated
Sus_scrofa___ENSSSCG00000046535	-1.88101	0.806139	15.782	0.000508821	0.0200194	3	7	Down-regulated
Sus_scrofa___PLEKHA6	-1.6727	6.40028	15.7809	0.000511079	0.020029	3	7	Down-regulated
Sus_scrofa___ENSSSCG00000005529	-1.76977	0.897142	15.7606	0.000511397	0.020029	3	7	Down-regulated
Sus_scrofa___ENSSSCG00000036306	-2.54365	2.66691	15.7176	0.000512175	0.020029	3	7	Down-regulated
Sus_scrofa___TMEM247	-3.18668	0.104968	15.4115	0.000525191	0.0204007	3	7	Down-regulated
Sus_scrofa___ENSSSCG00000043191	-3.12924	0.472123	15.4184	0.000532107	0.0205324	3	7	Down-regulated
Sus_scrofa___ENSSSCG00000040953	-3.21465	0.236039	15.339	0.000533105	0.0205324	3	7	Down-regulated
Sus_scrofa___TBX5	-1.07645	7.18982	15.6411	0.000534989	0.0205712	3	7	Down-regulated
Sus_scrofa___SLC25A35	-2.6258	0.405368	15.4873	0.000535693	0.0205737	3	7	Down-regulated
Sus_scrofa___CHCHD3	-2.26496	2.23863	15.5813	0.00054706	0.0208856	3	7	Down-regulated
Sus_scrofa___ENSSSCG00000035215	-1.97546	0.458958	15.502	0.000550849	0.0209763	3	7	Down-regulated
Sus_scrofa___NEBL	-0.989755	12.6365	15.5175	0.000557122	0.0210621	3	7	Down-regulated
Sus_scrofa___ENSSSCG00000046774	-3.35934	-1.15177	15.0361	0.000558014	0.0210621	3	7	Down-regulated
Sus_scrofa___ENSSSCG00000015747	-2.25165	9.94008	15.4877	0.000562621	0.0211374	3	7	Down-regulated
Sus_scrofa___ENSSSCG00000043232	-4.20454	1.26177	15.203	0.000564241	0.0211417	3	7	Down-regulated
Sus_scrofa___LDLRAD2	-2.17274	0.478096	15.363	0.000567897	0.0212526	3	7	Down-regulated
Sus_scrofa___GABRA4	-1.23698	6.74903	15.447	0.000570202	0.021314	3	7	Down-regulated
Sus_scrofa___COQ8A	-1.06407	7.79148	15.4323	0.000572967	0.0213678	3	7	Down-regulated
Sus_scrofa___IFN-DELTA-1	-3.17438	-0.342694	15.0656	0.000583288	0.0216274	3	7	Down-regulated
Sus_scrofa___ENSSSCG00000044559	-4.03662	-0.886921	14.8777	0.000589313	0.0218112	3	7	Down-regulated
Sus_scrofa___ENSSSCG00000042614	-1.65561	1.89896	15.3418	0.000592108	0.0218349	3	7	Down-regulated
Sus_scrofa___SRARP	-3.18755	-0.743184	14.9668	0.000592279	0.0218349	3	7	Down-regulated
Sus_scrofa___STAP2	-2.00609	-0.59979	15.0099	0.000603986	0.0220643	3	7	Down-regulated
Sus_scrofa___ENSSSCG00000033405	-2.78039	3.9822	15.2617	0.000606637	0.0221361	3	7	Down-regulated
Sus_scrofa___ENSSSCG00000018046	-1.52405	3.59927	15.2237	0.000614142	0.0223592	3	7	Down-regulated
Sus_scrofa___ENSSSCG00000042688	-3.3937	2.52012	15.2026	0.000617096	0.0224355	3	7	Down-regulated
Sus_scrofa___SERTAD2	-1.1162	7.47373	15.1985	0.000618998	0.0224355	3	7	Down-regulated
Sus_scrofa___ENSSSCG00000048743	-3.01944	-0.235078	14.9261	0.000620746	0.0224725	3	7	Down-regulated
Sus_scrofa___SLC51B	-3.73317	-0.669174	14.8211	0.000630283	0.0226648	3	7	Down-regulated
Sus_scrofa___DNAAF1	-1.95053	1.21077	15.1253	0.00063205	0.022703	3	7	Down-regulated
Sus_scrofa___BAAT	-1.57549	1.86435	15.1161	0.000638283	0.0228576	3	7	Down-regulated
Sus_scrofa___PAX9	-4.31609	-1.41337	14.6725	0.000644826	0.022957	3	7	Down-regulated
Sus_scrofa___NELL1	-1.36028	4.31674	15.0639	0.000647385	0.0229972	3	7	Down-regulated
Sus_scrofa___DGKK	-1.54349	1.46061	15.0556	0.000651309	0.0230856	3	7	Down-regulated
Sus_scrofa___GDF11	-2.15453	1.45403	15.0076	0.00065909	0.0232116	3	7	Down-regulated
Sus_scrofa___METTL11B	-2.78404	1.26776	14.9427	0.000660403	0.0232289	3	7	Down-regulated
Sus_scrofa___TECRL	-1.10099	10.5069	14.9976	0.00066178	0.0232519	3	7	Down-regulated
Sus_scrofa___HS3ST5	-3.07107	6.56874	14.9903	0.000663403	0.0232756	3	7	Down-regulated
Sus_scrofa___HR	-1.91938	2.30926	14.9623	0.000671224	0.0234812	3	7	Down-regulated
Sus_scrofa___FGF22	-5.16369	-1.92572	14.4966	0.00067427	0.0235621	3	7	Down-regulated
Sus_scrofa___ENSSSCG00000032625	-1.60325	0.304008	14.8516	0.000683615	0.0238111	3	7	Down-regulated
Sus_scrofa___ENSSSCG00000046452	-1.17157	5.86344	14.8971	0.000684363	0.0238114	3	7	Down-regulated
Sus_scrofa___GDPD2	-2.84746	3.09268	14.8982	0.000685812	0.023836	3	7	Down-regulated
Sus_scrofa___SLC28A3	-1.11709	1.99584	14.8854	0.00068893	0.0238973	3	7	Down-regulated
Sus_scrofa___ENSSSCG00000044445	-1.96731	1.18864	14.8809	0.000689059	0.0238973	3	7	Down-regulated
Sus_scrofa___CPNE3	-1.0018	9.37258	14.861	0.000692665	0.0239707	3	7	Down-regulated
Sus_scrofa___HLTF	-1.15713	6.34909	14.8234	0.000701447	0.0242485	3	7	Down-regulated
Sus_scrofa___ENSSSCG00000051264	-3.04196	0.275266	14.6041	0.000702717	0.0242664	3	7	Down-regulated
Sus_scrofa___ENSSSCG00000034367	-2.26462	2.17279	14.7442	0.000721457	0.024807	3	7	Down-regulated
Sus_scrofa___ENSSSCG00000033241	-1.33373	3.81687	14.6976	0.000731846	0.0250357	3	7	Down-regulated
Sus_scrofa___SP4	-0.785984	5.30821	14.692	0.000733098	0.0250467	3	7	Down-regulated
Sus_scrofa___LMOD1	-1.51956	2.98286	14.6532	0.000743327	0.0252521	3	7	Down-regulated
Sus_scrofa___CDH18	-2.23403	5.89382	14.6397	0.000746117	0.0252769	3	7	Down-regulated
Sus_scrofa___MCCC2	-1.33926	7.09144	14.595	0.000757443	0.0255262	3	7	Down-regulated
Sus_scrofa___ENSSSCG00000043872	-2.02816	4.35579	14.5785	0.000761786	0.0256457	3	7	Down-regulated
Sus_scrofa___ENTPD5	-1.04969	3.90608	14.5292	0.000774563	0.0259943	3	7	Down-regulated
Sus_scrofa___ENSSSCG00000050174	-3.21514	4.73224	14.4319	0.000800848	0.0265326	3	7	Down-regulated
Sus_scrofa___ENSSSCG00000043295	-2.49941	0.154666	14.2664	0.000802238	0.0265326	3	7	Down-regulated
Sus_scrofa___ENSSSCG00000022820	-1.05693	3.47297	14.4231	0.00080297	0.0265326	3	7	Down-regulated
Sus_scrofa___ENSSSCG00000032383	-1.61507	5.87227	14.4133	0.000805429	0.026556	3	7	Down-regulated
Sus_scrofa___TRDN	-1.5873	10.246	14.4073	0.00080707	0.026559	3	7	Down-regulated
Sus_scrofa___KCNRG	-1.8645	1.96089	14.394	0.000812667	0.0266614	3	7	Down-regulated
Papio_anubis_HOOK1	-1.99056	-0.429534	14.2268	0.00081464	0.026699	3	7	Down-regulated
Sus_scrofa___HACD1	-1.15829	7.5648	14.3251	0.000829912	0.0269525	3	7	Down-regulated
Sus_scrofa___UCP2	-1.41568	3.14146	14.2263	0.000858771	0.0275511	3	7	Down-regulated
Sus_scrofa___FBLIM1	-1.16571	5.81208	14.2193	0.000860329	0.0275511	3	7	Down-regulated
Sus_scrofa___ENSSSCG00000016623	-2.00443	-0.158319	14.0606	0.000868622	0.0277477	3	7	Down-regulated
Sus_scrofa___CNGA3	-2.8521	1.04146	14.1325	0.000878031	0.0279511	3	7	Down-regulated
Sus_scrofa___ENSSSCG00000050759	-3.24609	2.42525	14.137	0.000886315	0.0281036	3	7	Down-regulated
Sus_scrofa___CXCR6	-2.96253	0.594697	13.9818	0.000891984	0.028218	3	7	Down-regulated
Sus_scrofa___NAV2	-1.28194	9.9541	14.1116	0.000892553	0.028218	3	7	Down-regulated
Sus_scrofa___ENSSSCG00000047958	-2.71257	0.415566	13.9259	0.000905881	0.0285552	3	7	Down-regulated
Sus_scrofa___KLHL31	-1.23243	7.38783	14.0457	0.000912928	0.0286073	3	7	Down-regulated
Sus_scrofa___ASB2	-1.12942	8.4012	14.0453	0.000913043	0.0286073	3	7	Down-regulated
Sus_scrofa___ENSSSCG00000004082	-0.818619	8.58044	14.0452	0.000913056	0.0286073	3	7	Down-regulated
Sus_scrofa___TIMM44	-0.942601	5.00948	14.0418	0.000914143	0.0286073	3	7	Down-regulated
Papio_anubis_SF3B1	-1.94127	3.75156	14.0217	0.000920972	0.0286985	3	7	Down-regulated
Sus_scrofa___LRRTM3	-2.0839	9.98023	14.0196	0.000921126	0.0286985	3	7	Down-regulated
Sus_scrofa___SMYD3	-1.83476	9.69095	13.9945	0.000929078	0.0288346	3	7	Down-regulated
Sus_scrofa___KANK2	-1.14376	6.67279	13.9807	0.000933507	0.0288701	3	7	Down-regulated
Sus_scrofa___GABRG2	-2.58584	1.58652	13.9661	0.000936419	0.0289012	3	7	Down-regulated
Sus_scrofa___COBLL1	-1.15016	5.96425	13.9694	0.000937113	0.0289012	3	7	Down-regulated
Sus_scrofa___DNAH11	-1.3003	3.14193	13.9593	0.000940864	0.0289233	3	7	Down-regulated
Sus_scrofa___SOX10	-1.61807	4.32834	13.9342	0.000948624	0.0290792	3	7	Down-regulated
Sus_scrofa___ENSSSCG00000051693	-5.33248	-1.75878	13.4646	0.00094961	0.0290792	3	7	Down-regulated
Sus_scrofa___SORCS3	-1.20802	2.11299	13.9246	0.000953474	0.0291698	3	7	Down-regulated
Sus_scrofa___RPS6KB2	-0.949692	4.56137	13.8968	0.00096083	0.0292678	3	7	Down-regulated
Sus_scrofa___KCNJ3	-0.897093	9.82354	13.8887	0.000963464	0.0292678	3	7	Down-regulated
Sus_scrofa___DCBLD2	-0.858119	4.80452	13.8707	0.000969513	0.0293535	3	7	Down-regulated
Sus_scrofa___FOSB	-4.71246	1.8501	13.6599	0.000980715	0.0296369	3	7	Down-regulated
Sus_scrofa___RAB27A	-1.62414	2.16484	13.8317	0.000984599	0.0297264	3	7	Down-regulated
Sus_scrofa___CAST	-0.890014	9.30185	13.7931	0.000995748	0.0297771	3	7	Down-regulated
Sus_scrofa___ENSSSCG00000035477	-1.6983	3.09017	13.7688	0.00100508	0.0299793	3	7	Down-regulated
Sus_scrofa___ITGAM	-1.56012	3.09317	13.7598	0.00100787	0.0300347	3	7	Down-regulated
Sus_scrofa___RIOX2	-1.6354	5.06408	13.7359	0.00101564	0.0301798	3	7	Down-regulated
Sus_scrofa___ENSSSCG00000049121	-1.61437	1.06187	13.7354	0.00101603	0.0301798	3	7	Down-regulated
Sus_scrofa___CCDC152	-1.90526	1.9295	13.7413	0.00101609	0.0301798	3	7	Down-regulated
Sus_scrofa___HNRNPA2B1	-0.807771	7.89235	13.7334	0.00101649	0.0301798	3	7	Down-regulated
Sus_scrofa___ENSSSCG00000010968	-1.08113	4.60836	13.7287	0.00101821	0.0302027	3	7	Down-regulated
Sus_scrofa___EYA4	-2.53986	5.84813	13.7074	0.00102572	0.0302746	3	7	Down-regulated
Sus_scrofa___ENSSSCG00000046510	-2.60955	-0.161387	13.4057	0.00102611	0.0302746	3	7	Down-regulated
Sus_scrofa___ESF1	-0.818597	6.7597	13.7046	0.00102666	0.0302746	3	7	Down-regulated
Sus_scrofa___MYH6	-2.97304	9.49811	13.691	0.00103153	0.0303738	3	7	Down-regulated
Sus_scrofa___CPED1	-1.73901	9.20779	13.6771	0.00103649	0.030492	3	7	Down-regulated
Sus_scrofa___PAICS	-1.52351	2.15437	13.6752	0.00103938	0.0305493	3	7	Down-regulated
Sus_scrofa___BMP5	-1.40175	6.29432	13.6546	0.0010446	0.0305632	3	7	Down-regulated
Sus_scrofa___MYOM1	-0.925262	10.2356	13.6512	0.00104584	0.0305717	3	7	Down-regulated
Sus_scrofa___ENSSSCG00000050753	-2.44436	-0.673279	13.2465	0.00106216	0.0309362	3	7	Down-regulated
Sus_scrofa___ADAMTS9	-1.09418	8.02766	13.6019	0.00106388	0.0309582	3	7	Down-regulated
Sus_scrofa___PNISR	-0.600631	8.74183	13.5915	0.00106771	0.0310417	3	7	Down-regulated
Sus_scrofa___ENSSSCG00000049158	-1.06506	7.22313	13.5541	0.00108166	0.0313058	3	7	Down-regulated
Sus_scrofa___ENSSSCG00000039961	-4.07036	0.395635	13.1752	0.00109882	0.0316318	3	7	Down-regulated
Sus_scrofa___B3GALT2	-1.58398	4.93034	13.509	0.00109882	0.0316318	3	7	Down-regulated
Sus_scrofa___HIPK3	-0.873051	8.88362	13.5051	0.00110028	0.0316456	3	7	Down-regulated
Sus_scrofa___ENSSSCG00000023322	-2.47301	-0.777526	13.2194	0.00111712	0.0320439	3	7	Down-regulated
Sus_scrofa___MINDY4B	-2.34198	0.496533	13.1749	0.00113441	0.0324243	3	7	Down-regulated
Sus_scrofa___RORA	-0.97927	9.42995	13.4067	0.00113864	0.0324877	3	7	Down-regulated
Sus_scrofa___CD180	-3.89053	-0.632452	13.0563	0.00115282	0.0327627	3	7	Down-regulated
Sus_scrofa___ENSSSCG00000033189	-1.00607	4.87768	13.361	0.00115702	0.0328373	3	7	Down-regulated
Sus_scrofa___EEPD1	-1.13366	6.01892	13.334	0.00116794	0.0330598	3	7	Down-regulated
Sus_scrofa___SAXO1	-1.85515	1.44755	13.3072	0.00118142	0.0332481	3	7	Down-regulated
Sus_scrofa___ENSSSCG00000037370	-3.13672	1.18447	13.2417	0.00118258	0.0332481	3	7	Down-regulated
Sus_scrofa___CRH	-3.36442	-0.0155228	13.1075	0.00118309	0.0332481	3	7	Down-regulated
Sus_scrofa___SMC1B	-2.26031	4.8898	13.2518	0.00120216	0.0335853	3	7	Down-regulated
Sus_scrofa___CES5A	-1.66093	1.48228	13.1718	0.00123859	0.0344021	3	7	Down-regulated
Sus_scrofa___ZNF70	-1.26732	2.50277	13.1414	0.00125095	0.0347073	3	7	Down-regulated
Sus_scrofa___ENSSSCG00000043759	-2.09573	3.04708	13.1171	0.00126208	0.0349559	3	7	Down-regulated
Sus_scrofa___ENSSSCG00000047749	-1.10414	5.18521	13.0822	0.00127592	0.0352057	3	7	Down-regulated
Sus_scrofa___FSHB	-2.83899	-0.298739	12.8856	0.00127876	0.0352057	3	7	Down-regulated
Sus_scrofa___ENSSSCG00000040109	-0.930158	10.7125	13.0599	0.00128598	0.035351	3	7	Down-regulated
Sus_scrofa___ENSSSCG00000045986	-3.78849	2.29896	13.0494	0.00129039	0.035351	3	7	Down-regulated
Sus_scrofa___IQCA1L	-1.83063	1.71256	13.0512	0.00129079	0.035351	3	7	Down-regulated
Sus_scrofa___ARMC2	-1.47527	7.57315	13.0442	0.00129309	0.035351	3	7	Down-regulated
Sus_scrofa___RXFP4	-2.74367	2.33862	13.0463	0.00129354	0.035351	3	7	Down-regulated
Sus_scrofa___SLC7A7	-1.48423	3.52669	13.0433	0.00129392	0.035351	3	7	Down-regulated
Sus_scrofa___ENSSSCG00000040134	-2.2429	-0.371767	12.881	0.00129964	0.0354773	3	7	Down-regulated
Sus_scrofa___ENSSSCG00000047842	-3.40598	-0.781515	12.7742	0.00130292	0.035496	3	7	Down-regulated
Sus_scrofa___LRFN2	-1.75283	6.64823	13.0182	0.00130506	0.035496	3	7	Down-regulated
Sus_scrofa___ENSSSCG00000044253	-2.29188	2.34864	13.0186	0.00130695	0.035496	3	7	Down-regulated
Sus_scrofa___ENSSSCG00000050005	-3.21336	1.50118	12.9514	0.00131067	0.0355671	3	7	Down-regulated
Sus_scrofa___ENSSSCG00000048533	-2.34355	2.26905	12.9705	0.00132938	0.0358934	3	7	Down-regulated
Sus_scrofa___ENSSSCG00000033896	-3.99301	-0.773352	12.7505	0.00133601	0.0360421	3	7	Down-regulated
Sus_scrofa___ATG16L2	-1.19272	2.80181	12.9279	0.00134872	0.0362936	3	7	Down-regulated
Sus_scrofa___ATP2A2	-0.954254	11.4636	12.9161	0.00135302	0.0363191	3	7	Down-regulated
Sus_scrofa___ENSSSCG00000049620	-2.47038	-0.479252	12.7237	0.00135305	0.0363191	3	7	Down-regulated
Sus_scrofa___USP35	-1.66758	2.01621	12.9192	0.00135453	0.0363284	3	7	Down-regulated
Sus_scrofa___OSBPL3	-0.696938	8.16116	12.8912	0.00136501	0.0365184	3	7	Down-regulated
Sus_scrofa___GNAO1	-1.66957	5.39534	12.8486	0.00138588	0.0369537	3	7	Down-regulated
Sus_scrofa___ENSSSCG00000005519	-2.59106	0.146662	12.7413	0.00139223	0.0370478	3	7	Down-regulated
Sus_scrofa___MARCHF4	-1.77204	-0.0754917	12.7191	0.00141124	0.0374439	3	7	Down-regulated
Sus_scrofa___NICN1	-1.25824	1.43957	12.8035	0.00141288	0.0374566	3	7	Down-regulated
Sus_scrofa___HPF1	-0.839102	3.51145	12.7089	0.00145668	0.0383963	3	7	Down-regulated
Sus_scrofa___FAM151A	-2.73178	2.55702	12.6968	0.00146312	0.0384715	3	7	Down-regulated
Sus_scrofa___TLE2	-1.04665	4.67568	12.6682	0.00147773	0.038729	3	7	Down-regulated
Sus_scrofa___SLITRK6	-6.31184	-0.931193	12.7223	0.00149609	0.0390262	3	7	Down-regulated
Sus_scrofa___ENSSSCG00000051377	-3.19071	-1.30245	12.1889	0.00149669	0.0390262	3	7	Down-regulated
Sus_scrofa___RBMS2	-0.914337	5.65841	12.6212	0.00150268	0.0390648	3	7	Down-regulated
Sus_scrofa___ENSSSCG00000050706	-2.43949	-1.24679	12.2551	0.00150449	0.0390803	3	7	Down-regulated
Sus_scrofa___CHODL	-1.14077	3.44451	12.6094	0.00150944	0.0391772	3	7	Down-regulated
Sus_scrofa___MRTFB	-0.688703	8.58443	12.5637	0.00153393	0.0396849	3	7	Down-regulated
Sus_scrofa___PANK4	-1.46683	4.60844	12.5607	0.00153571	0.0396992	3	7	Down-regulated
Sus_scrofa___TRPC4	-1.58494	3.82556	12.5442	0.00154506	0.0398563	3	7	Down-regulated
Sus_scrofa___TP53INP2	-1.15779	3.88628	12.5304	0.00155252	0.039973	3	7	Down-regulated
Sus_scrofa___YIPF2	-0.761436	5.86717	12.4958	0.0015717	0.0403699	3	7	Down-regulated
Sus_scrofa___ATOH8	-2.0751	4.24601	12.4791	0.00158134	0.040482	3	7	Down-regulated
Sus_scrofa___CPT1B	-1.12313	7.21521	12.4703	0.00158612	0.040482	3	7	Down-regulated
Sus_scrofa___ADH4	-1.90964	1.11829	12.438	0.00159811	0.0407234	3	7	Down-regulated
Sus_scrofa___DDI1	-3.1184	2.64739	12.4364	0.00160344	0.0408046	3	7	Down-regulated
Sus_scrofa___TRIP13	-0.883448	3.64649	12.3961	0.00162933	0.0411841	3	7	Down-regulated
Sus_scrofa___STRIP2	-0.93419	6.59216	12.3646	0.00164761	0.0414919	3	7	Down-regulated
Sus_scrofa___ENSSSCG00000017734	-2.04324	1.49969	12.3633	0.00165327	0.0415997	3	7	Down-regulated
Sus_scrofa___SCARF1	-1.16924	5.37252	12.3437	0.0016601	0.0416435	3	7	Down-regulated
Sus_scrofa___CMYA5	-1.43053	5.37704	12.3287	0.00166908	0.0418037	3	7	Down-regulated
Sus_scrofa___U2AF1L4	-1.18797	2.39723	12.2875	0.0016964	0.0423888	3	7	Down-regulated
Sus_scrofa___ENSSSCG00000048847	-2.21076	-1.19091	11.9966	0.00169944	0.0424319	3	7	Down-regulated
Sus_scrofa___ENSSSCG00000043054	-2.65102	-1.1433	12.0345	0.00170105	0.0424392	3	7	Down-regulated
Sus_scrofa___DENND4A	-0.707936	6.97838	12.2641	0.00170842	0.0425901	3	7	Down-regulated
Sus_scrofa___EPC1	-0.601425	8.69209	12.2539	0.00171473	0.0427143	3	7	Down-regulated
Sus_scrofa___HABP2	-2.00698	2.18456	12.2492	0.0017208	0.0427992	3	7	Down-regulated
Sus_scrofa___C12orf56	-1.32619	2.08648	12.2378	0.00172857	0.0429497	3	7	Down-regulated
Sus_scrofa___TSPAN11	-1.6117	2.17598	12.2356	0.00173083	0.0429497	3	7	Down-regulated
Sus_scrofa___ING5	-0.755552	4.27632	12.2282	0.00173085	0.0429497	3	7	Down-regulated
Papio_anubis_SOX6	-1.75366	1.5074	12.1993	0.00175221	0.0433129	3	7	Down-regulated
Sus_scrofa___ENSSSCG00000039443	-1.50436	0.122168	12.1613	0.00175222	0.0433129	3	7	Down-regulated
Sus_scrofa___SYNM	-1.27929	6.72478	12.1897	0.00175506	0.0433498	3	7	Down-regulated
Sus_scrofa___IRF8	-1.23355	2.81986	12.1532	0.00177945	0.0438178	3	7	Down-regulated
Sus_scrofa___NDUFB2	-0.831354	5.38409	12.1428	0.00178515	0.0438543	3	7	Down-regulated
Sus_scrofa___SCUBE3	-1.54901	3.78029	12.1386	0.00178813	0.0438543	3	7	Down-regulated
Sus_scrofa___GAS7	-2.0748	1.33163	12.143	0.00178875	0.0438543	3	7	Down-regulated
Sus_scrofa___RGS11	-1.69588	1.92941	12.1246	0.00180138	0.044088	3	7	Down-regulated
Sus_scrofa___ENSSSCG00000034188	-2.86375	-0.649688	11.851	0.00181372	0.0442707	3	7	Down-regulated
Sus_scrofa___ENSSSCG00000042626	-4.56089	-1.04607	12.0092	0.00181435	0.0442707	3	7	Down-regulated
Sus_scrofa___ENSSSCG00000044214	-2.58148	-0.817926	11.8926	0.00181601	0.0442776	3	7	Down-regulated
Sus_scrofa___D2HGDH	-0.965383	4.31663	12.0837	0.00182399	0.0444048	3	7	Down-regulated
Sus_scrofa___ENSSSCG00000050969	-1.31474	0.201553	12.0562	0.00182934	0.0445016	3	7	Down-regulated
Sus_scrofa___ITPRID1	-2.09208	3.37055	12.074	0.00183192	0.0445306	3	7	Down-regulated
Sus_scrofa___ENSSSCG00000034352	-2.45581	3.29265	12.0473	0.00185002	0.0448688	3	7	Down-regulated
Sus_scrofa___HNRNPH1	-0.617186	7.37326	12.0302	0.00185966	0.0450348	3	7	Down-regulated
Sus_scrofa___PIF1	-2.31319	-0.630002	11.8161	0.00187302	0.0452223	3	7	Down-regulated
Sus_scrofa___PHEX	-0.89124	6.74091	12.001	0.00187958	0.0453126	3	7	Down-regulated
Sus_scrofa___ILF2	-1.07581	3.06768	11.9981	0.00188232	0.0453448	3	7	Down-regulated
Sus_scrofa___OCIAD2	-1.7659	5.87006	11.9616	0.00190678	0.0457626	3	7	Down-regulated
Sus_scrofa___CYTIP	-2.29052	4.67992	11.9531	0.00191294	0.0458105	3	7	Down-regulated
Sus_scrofa___TACR3	-2.47087	0.428294	11.85	0.00191304	0.0458105	3	7	Down-regulated
Sus_scrofa___ENSSSCG00000044201	-1.79994	-0.259333	11.858	0.00192895	0.0461571	3	7	Down-regulated
Sus_scrofa___SORBS1	-0.717247	12.062	11.9156	0.00193905	0.0462269	3	7	Down-regulated
Sus_scrofa___SOSTDC1	-3.54593	-0.851866	11.6388	0.00197549	0.046707	3	7	Down-regulated
Sus_scrofa___ENSSSCG00000044095	-2.26414	-0.400818	11.7023	0.00199125	0.0469757	3	7	Down-regulated
Sus_scrofa___TTN	-0.775989	14.628	11.8169	0.00201032	0.0472608	3	7	Down-regulated
Sus_scrofa___EFHC2	-1.33127	2.86663	11.7897	0.00203167	0.0476979	3	7	Down-regulated
Sus_scrofa___NSUN6	-1.23532	6.92476	11.7784	0.00203889	0.0477582	3	7	Down-regulated
Sus_scrofa___ENSSSCG00000051445	-1.65286	0.995078	11.769	0.00204992	0.0479467	3	7	Down-regulated
Sus_scrofa___ENSSSCG00000026345	-1.14366	2.35	11.758	0.00205641	0.0480636	3	7	Down-regulated
Papio_anubis_LDB3	-5.16962	-2.19624	11.2478	0.0020627	0.0480926	3	7	Down-regulated
Sus_scrofa___TRRAP	-0.554092	6.96181	11.7268	0.00207791	0.0482507	3	7	Down-regulated
Sus_scrofa___CCBE1	-1.17405	8.49662	11.692	0.00210464	0.0486299	3	7	Down-regulated
Sus_scrofa___TEX47	-5.42263	-1.93198	11.3624	0.00214119	0.0492599	3	7	Down-regulated
Sus_scrofa___MYBL1	-1.67055	2.77196	11.6452	0.00214272	0.0492599	3	7	Down-regulated
Sus_scrofa___PDHA1	-0.773063	5.99643	11.639	0.00214612	0.049288	3	7	Down-regulated
Sus_scrofa___ENSSSCG00000043628	-1.83497	3.83257	11.6383	0.00214709	0.049288	3	7	Down-regulated
Sus_scrofa___ENSSSCG00000050867	-1.64036	-0.494441	11.4962	0.00215459	0.0493857	3	7	Down-regulated
Sus_scrofa___ENSSSCG00000040632	-2.28263	0.937028	11.5836	0.00216823	0.0496318	3	7	Down-regulated
Sus_scrofa___FGF1	-1.00918	7.93498	11.6059	0.00217247	0.0496626	3	7	Down-regulated
Sus_scrofa___PASK	-0.910418	2.56406	11.5906	0.00218635	0.0499073	3	7	Down-regulated
Sus_scrofa___CSTA	-1.43958	1.79427	11.5898	0.00218909	0.0499073	3	7	Down-regulated
Sus_scrofa___TOX2	-1.49482	1.90644	11.5878	0.00219128	0.0499073	3	7	Down-regulated
Sus_scrofa___ADAMTSL4	-1.82587	3.10934	11.5838	0.00219144	0.0499073	3	7	Down-regulated
Sus_scrofa___DNPH1	-1.39897	2.45056	11.5832	0.00219413	0.0499073	3	7	Down-regulated

## Sheet: Fibroblasts
Gene	logFC	logCPM	F	PValue	FDR	Observations_PCMV	Observations_Standard	level
Sus_scrofa___OSBPL11	2.65952	6.14378	60.0775	2.92712e-08	0.000750161	3	7	Up-regulated
Sus_scrofa___OASL	3.87463	3.03397	48.1039	6.90705e-08	0.00088507	3	7	Up-regulated
Sus_scrofa___VAV3	2.43363	8.37736	45.9807	3.14031e-07	0.0018217	3	7	Up-regulated
Sus_scrofa___RGS2	5.282	5.76226	44.8907	3.55412e-07	0.0018217	3	7	Up-regulated
Sus_scrofa___ENSSSCG00000004081	1.82638	6.5118	41.0818	8.10593e-07	0.0029677	3	7	Up-regulated
Sus_scrofa___SLITRK6	5.31119	2.04944	36.4571	9.84711e-07	0.00315452	3	7	Up-regulated
Sus_scrofa___ENC1	2.70867	4.15272	37.5087	1.42958e-06	0.00407082	3	7	Up-regulated
Sus_scrofa___THSD7B	3.26306	4.49286	37.1946	1.79238e-06	0.00417591	3	7	Up-regulated
Sus_scrofa___IL1A	5.46577	1.64253	33.0326	2.2394e-06	0.00476866	3	7	Up-regulated
Sus_scrofa___FZD2	2.93703	2.32173	30.6959	2.56518e-06	0.00476866	3	7	Up-regulated
Sus_scrofa___SPOCK3	2.58421	7.01483	35.4882	2.60501e-06	0.00476866	3	7	Up-regulated
Sus_scrofa___ENSSSCG00000030335	2.8432	2.18492	28.8081	4.42401e-06	0.00708615	3	7	Up-regulated
Sus_scrofa___PAPPA	2.34522	8.74482	32.7104	4.83465e-06	0.00728837	3	7	Up-regulated
Sus_scrofa___FRMPD4	3.12535	5.49924	32.5039	5.2002e-06	0.00740393	3	7	Up-regulated
Sus_scrofa___NTF3	3.00566	4.34506	31.4439	6.60712e-06	0.00891196	3	7	Up-regulated
Sus_scrofa___GDF15	4.89895	1.14354	31.843	7.2165e-06	0.00924722	3	7	Up-regulated
Sus_scrofa___PI15	3.27069	7.26197	30.6042	7.95989e-06	0.0095924	3	7	Up-regulated
Sus_scrofa___ENSSSCG00000013260	2.65732	3.44481	29.9862	8.23446e-06	0.0095924	3	7	Up-regulated
Sus_scrofa___ITPR1	1.34212	9.09979	29.8101	9.56426e-06	0.00996752	3	7	Up-regulated
Sus_scrofa___ZMAT3	2.22708	4.46025	28.3245	9.80361e-06	0.00996752	3	7	Up-regulated
Sus_scrofa___BMP6	1.60008	8.7592	29.7024	9.81719e-06	0.00996752	3	7	Up-regulated
Sus_scrofa___CREM	2.34655	4.02875	29.1587	1.08406e-05	0.0102898	3	7	Up-regulated
Sus_scrofa___CCN4	4.80914	5.69864	28.6016	1.16446e-05	0.0105554	3	7	Up-regulated
Sus_scrofa___MGMT	1.67355	7.60222	28.8939	1.19623e-05	0.0105554	3	7	Up-regulated
Sus_scrofa___PTN	2.99354	5.33481	28.8507	1.23561e-05	0.0105554	3	7	Up-regulated
Sus_scrofa___ITPRID1	3.23817	3.14946	26.1063	1.31828e-05	0.0108983	3	7	Up-regulated
Sus_scrofa___KANK1	3.46823	5.67461	28.3043	1.41219e-05	0.0112316	3	7	Up-regulated
Sus_scrofa___PRICKLE2	1.66021	9.50696	28.1263	1.44624e-05	0.0112316	3	7	Up-regulated
Sus_scrofa___CDCA7L	3.44249	3.43255	25.7593	1.55847e-05	0.0117472	3	7	Up-regulated
Sus_scrofa___ENSSSCG00000029761	3.26935	2.04458	24.3659	1.61633e-05	0.0118353	3	7	Up-regulated
Sus_scrofa___SHISA9	5.37052	5.85009	26.2352	1.66833e-05	0.0118767	3	7	Up-regulated
Sus_scrofa___TMEM266	3.17011	1.91872	22.9421	2.02803e-05	0.0140471	3	7	Up-regulated
Sus_scrofa___TXNDC5	1.1981	5.73264	25.8355	2.61406e-05	0.0171596	3	7	Up-regulated
Sus_scrofa___CHSY3	1.60658	9.40207	25.6611	2.7168e-05	0.0171596	3	7	Up-regulated
Sus_scrofa___CRLF1	2.59488	5.45892	26.9068	2.82967e-05	0.0171596	3	7	Up-regulated
Sus_scrofa___ECM1	1.63253	5.38108	25.5393	2.83486e-05	0.0171596	3	7	Up-regulated
Sus_scrofa___SLC26A2	2.30465	3.57217	24.7941	2.84635e-05	0.0171596	3	7	Up-regulated
Sus_scrofa___SATB1	4.14702	2.10386	22.7644	2.87912e-05	0.0171596	3	7	Up-regulated
Sus_scrofa___GTF2A1L	1.68391	7.13265	25.3006	2.98988e-05	0.0174147	3	7	Up-regulated
Sus_scrofa___ENSSSCG00000016263	2.56037	6.81717	25.0945	3.1633e-05	0.0178069	3	7	Up-regulated
Sus_scrofa___CCDC194	2.84867	2.43621	22.7212	3.27261e-05	0.0178069	3	7	Up-regulated
Sus_scrofa___AMPD3	4.2595	4.27103	23.4099	3.29291e-05	0.0178069	3	7	Up-regulated
Sus_scrofa___KCNN3	2.0723	5.66623	24.9259	3.33515e-05	0.0178069	3	7	Up-regulated
Sus_scrofa___TMEM150C	1.3182	8.25957	24.7867	3.424e-05	0.0179082	3	7	Up-regulated
Sus_scrofa___DLG3	4.14665	1.57375	22.9809	3.70196e-05	0.0186027	3	7	Up-regulated
Sus_scrofa___SLC35B4	2.87588	3.70643	22.8309	3.9633e-05	0.019533	3	7	Up-regulated
Sus_scrofa___ENSSSCG00000017103	2.71196	3.70651	23.4372	4.10695e-05	0.0195963	3	7	Up-regulated
Sus_scrofa___OGDH	1.91141	6.27323	23.9937	4.26813e-05	0.0198405	3	7	Up-regulated
Sus_scrofa___USP45	1.69606	4.97044	23.7173	4.37659e-05	0.0198405	3	7	Up-regulated
Sus_scrofa___ENSSSCG00000017754	2.09129	5.25993	23.889	4.4128e-05	0.0198405	3	7	Up-regulated
Sus_scrofa___SLC25A1	2.48111	2.69059	21.9139	4.93043e-05	0.0214635	3	7	Up-regulated
Sus_scrofa___APP	1.03756	8.87799	23.2512	5.19265e-05	0.0214635	3	7	Up-regulated
Sus_scrofa___CCSER2	1.07186	7.31168	23.2341	5.22058e-05	0.0214635	3	7	Up-regulated
Sus_scrofa___GABRA2	3.56716	3.29748	20.8669	5.22059e-05	0.0214635	3	7	Up-regulated
Sus_scrofa___TTC23	2.34253	4.2666	22.5732	5.27626e-05	0.0214635	3	7	Up-regulated
Sus_scrofa___ENSSSCG00000007001	2.59194	4.82579	23.1371	5.46956e-05	0.0219022	3	7	Up-regulated
Sus_scrofa___ENSSSCG00000031462	1.35464	7.9928	22.9546	5.63841e-05	0.022231	3	7	Up-regulated
Sus_scrofa___ENSSSCG00000009240	2.739	5.51282	22.6838	6.10963e-05	0.023129	3	7	Up-regulated
Sus_scrofa___DPYSL3	2.20078	7.87229	22.6264	6.17833e-05	0.023129	3	7	Up-regulated
Sus_scrofa___GPM6B	1.16081	8.20836	21.7822	7.83975e-05	0.0279052	3	7	Up-regulated
Sus_scrofa___PTGS1	1.18456	7.14464	21.6809	8.0707e-05	0.0279508	3	7	Up-regulated
Sus_scrofa___FGF14	1.84953	3.95907	21.5033	8.36197e-05	0.0283692	3	7	Up-regulated
Sus_scrofa___GDAP1	2.97125	1.55561	18.9711	8.99974e-05	0.0299539	3	7	Up-regulated
Sus_scrofa___HERC4	1.04933	7.75888	21.1494	9.39869e-05	0.0304898	3	7	Up-regulated
Sus_scrofa___GNAO1	2.79147	3.4349	19.3067	0.000103136	0.0330397	3	7	Up-regulated
Sus_scrofa___ARHGAP5	1.10217	7.77922	20.7371	0.000105942	0.0335195	3	7	Up-regulated
Sus_scrofa___KIF12	2.82139	2.66151	19.5092	0.000107927	0.0336053	3	7	Up-regulated
Sus_scrofa___TMCC3	1.82249	6.00691	20.6551	0.000108836	0.0336053	3	7	Up-regulated
Sus_scrofa___PRKG2	2.75527	3.02198	19.7894	0.000111335	0.0339678	3	7	Up-regulated
Sus_scrofa___TG	3.01876	2.62188	18.3422	0.000128927	0.0377656	3	7	Up-regulated
Sus_scrofa___JAK2	0.984797	9.24288	20.0193	0.000130805	0.0377656	3	7	Up-regulated
Sus_scrofa___TP53INP1	1.76269	5.87239	19.9876	0.000132625	0.0377656	3	7	Up-regulated
Sus_scrofa___TSC22D1	1.19396	7.47179	19.9219	0.000134689	0.0379321	3	7	Up-regulated
Sus_scrofa___ITM2C	1.76208	3.69454	19.805	0.000137107	0.0381933	3	7	Up-regulated
Sus_scrofa___ENSSSCG00000021200	1.20259	7.61632	19.7819	0.000140417	0.0382072	3	7	Up-regulated
Sus_scrofa___C2CD3	1.37627	6.82975	19.7631	0.000141283	0.0382072	3	7	Up-regulated
Sus_scrofa___FBN2	2.04298	8.08246	19.5731	0.000149435	0.0394816	3	7	Up-regulated
Sus_scrofa___UNC93B1	1.74357	4.32418	19.5525	0.000152275	0.0398215	3	7	Up-regulated
Sus_scrofa___ASNS	1.31393	5.8701	19.4482	0.000155427	0.0402353	3	7	Up-regulated
Sus_scrofa___ENSSSCG00000009293	1.68717	7.42997	19.3928	0.000157891	0.0404644	3	7	Up-regulated
Sus_scrofa___KCNIP2	3.69497	2.85413	17.6845	0.000161162	0.0408936	3	7	Up-regulated
Sus_scrofa___FAM155A	2.85784	3.67752	19.0894	0.000163613	0.0411086	3	7	Up-regulated
Sus_scrofa___SUPT3H	1.07724	7.37135	19.1882	0.000167837	0.0412553	3	7	Up-regulated
Sus_scrofa___G0S2	2.79696	2.25991	17.6437	0.000169347	0.0412553	3	7	Up-regulated
pCMV_____gp45	7.74476	1.67899	23.0216	0.000170278	0.0412553	3	7	Up-regulated
Sus_scrofa___CA12	2.29621	6.04837	19.1573	0.00017075	0.0412553	3	7	Up-regulated
Sus_scrofa___NMNAT2	1.74224	5.49371	19.0309	0.000177118	0.0420293	3	7	Up-regulated
Sus_scrofa___TIMP1	2.20984	6.27316	18.7749	0.000183948	0.0432496	3	7	Up-regulated
Sus_scrofa___ENSSSCG00000003451	1.27265	6.80098	18.6921	0.0001953	0.0450914	3	7	Up-regulated
Sus_scrofa___ENSSSCG00000033786	1.95771	6.0167	18.6257	0.000200206	0.0458113	3	7	Up-regulated
Sus_scrofa___C14orf119	1.72567	3.48025	18.2808	0.000206086	0.0467395	3	7	Up-regulated
Sus_scrofa___B3GALT2	6.57748	1.3555	17.8909	0.000213689	0.0480387	3	7	Up-regulated
Sus_scrofa___TP63	3.67336	3.04148	17.0308	0.000216824	0.0483196	3	7	Up-regulated
Sus_scrofa___SPP1	5.44992	1.24602	18.0422	0.000219178	0.0484231	3	7	Up-regulated
Sus_scrofa___TMEFF2	-3.8246	7.91985	50.4392	1.41764e-07	0.00121104	3	7	Down-regulated
Sus_scrofa___ITGB3	-2.81833	6.7501	42.5601	6.06004e-07	0.00258844	3	7	Down-regulated
Sus_scrofa___SLC29A1	-3.67481	4.22907	36.4505	1.70562e-06	0.00417591	3	7	Down-regulated
Sus_scrofa___GPC5	-4.89784	8.41179	33.3436	4.08583e-06	0.00698078	3	7	Down-regulated
Sus_scrofa___CA10	-2.32258	7.47974	29.5912	1.01122e-05	0.00996752	3	7	Down-regulated
Sus_scrofa___UACA	-1.34825	8.66278	24.5302	3.66705e-05	0.0186027	3	7	Down-regulated
Sus_scrofa___DEPDC1B	-1.48252	5.53945	24.1104	4.12908e-05	0.0195963	3	7	Down-regulated
Sus_scrofa___NRXN1	-5.15264	7.54662	23.2479	5.21897e-05	0.0214635	3	7	Down-regulated
Sus_scrofa___ISM1	-3.16354	7.66092	22.6557	6.1344e-05	0.023129	3	7	Down-regulated
Sus_scrofa___ENSSSCG00000040956	-1.50946	6.25058	22.6055	6.22719e-05	0.023129	3	7	Down-regulated
Sus_scrofa___ENSSSCG00000035525	-2.38716	4.43324	22.046	7.17587e-05	0.026152	3	7	Down-regulated
Sus_scrofa___LTBP1	-1.73724	10.031	22.0587	7.24516e-05	0.026152	3	7	Down-regulated
Sus_scrofa___CD302	-1.99034	5.59827	21.7327	7.99155e-05	0.0279508	3	7	Down-regulated
Sus_scrofa___CREB5	-1.20115	9.66968	21.5338	8.4129e-05	0.0283692	3	7	Down-regulated
Sus_scrofa___SNRNP70	-1.24503	8.58501	21.1787	9.31803e-05	0.0304898	3	7	Down-regulated
Sus_scrofa___CD34	-1.43792	6.938	20.293	0.000120712	0.0363954	3	7	Down-regulated
Sus_scrofa___MITF	-2.64803	8.5774	20.1528	0.000125749	0.0374733	3	7	Down-regulated
Sus_scrofa___MEOX2	-1.75443	7.36724	19.9909	0.000131954	0.0377656	3	7	Down-regulated
Sus_scrofa___PRDM6	-1.97194	6.10595	19.7634	0.00014163	0.0382072	3	7	Down-regulated
Sus_scrofa___PELI2	-1.02759	8.84492	19.6829	0.000144586	0.0385984	3	7	Down-regulated
Sus_scrofa___RFX2	-1.76281	7.60878	19.1021	0.000172246	0.0412553	3	7	Down-regulated
Sus_scrofa___TNS2	-1.02507	6.92475	18.817	0.000187886	0.0437739	3	7	Down-regulated
Sus_scrofa___ENPP1	-1	9.43451	18.2772	0.00022168	0.0485574	3	7	Down-regulated
Sus_scrofa___TNXB	-2.16847	8.60788	18.1652	0.00022952	0.0498486	3	7	Down-regulated

## Sheet: Mural cells
Gene	logFC	logCPM	F	PValue	FDR	Observations_PCMV	Observations_Standard	level
Sus_scrofa___ENSSSCG00000032436	3.66713	6.08856	43.4668	6.76036e-08	0.000592005	3	7	Up-regulated
Sus_scrofa___CXCL10	4.90541	4.87606	38.4252	1.0524e-07	0.000592005	3	7	Up-regulated
Sus_scrofa___VAV3	2.78945	6.18875	42.1409	1.25738e-07	0.000592005	3	7	Up-regulated
Sus_scrofa___SELENOP	3.19994	6.24115	40.4022	1.76102e-07	0.000620652	3	7	Up-regulated
Sus_scrofa___GALR1	2.73531	7.6437	40.5725	1.97733e-07	0.000620652	3	7	Up-regulated
Sus_scrofa___ENSSSCG00000009240	3.51436	5.29086	35.4379	3.78544e-07	0.00086432	3	7	Up-regulated
Sus_scrofa___ENSSSCG00000016263	2.55071	7.81171	37.5813	4.13045e-07	0.00086432	3	7	Up-regulated
Sus_scrofa___BST2	3.37357	6.23359	32.237	1.12121e-06	0.00175965	3	7	Up-regulated
Sus_scrofa___F3	3.66008	6.20082	31.0026	1.82848e-06	0.0024597	3	7	Up-regulated
Sus_scrofa___PLSCR4	1.61565	9.05822	31.0901	2.31087e-06	0.00260631	3	7	Up-regulated
Sus_scrofa___RSAD2	4.09708	6.56517	28.9903	2.82624e-06	0.00276361	3	7	Up-regulated
Sus_scrofa___SPOCK1	2.78186	7.56457	30.2717	2.93486e-06	0.00276361	3	7	Up-regulated
Sus_scrofa___CRACR2A	3.71588	5.3791	25.2456	7.72048e-06	0.00538518	3	7	Up-regulated
Sus_scrofa___ENSSSCG00000001229	2.155	8.39722	26.3832	9.11221e-06	0.00591759	3	7	Up-regulated
Sus_scrofa___ZBP1	2.87572	6.00304	25.9803	9.71536e-06	0.00609898	3	7	Up-regulated
Sus_scrofa___ENSSSCG00000006418	3.0084	5.62244	25.4427	1.06548e-05	0.00629032	3	7	Up-regulated
Sus_scrofa___IRS1	2.4928	6.65928	25.7207	1.118e-05	0.00629032	3	7	Up-regulated
Sus_scrofa___MX2	3.98094	8.2663	25.3173	1.15826e-05	0.00629032	3	7	Up-regulated
Sus_scrofa___PI15	4.1361	6.52081	23.7479	1.55672e-05	0.00684308	3	7	Up-regulated
Sus_scrofa___ENSSSCG00000044574	3.5141	4.77911	22.2518	1.85753e-05	0.00777398	3	7	Up-regulated
Sus_scrofa___ENSSSCG00000014672	2.99883	5.54305	22.7371	2.37478e-05	0.00894507	3	7	Up-regulated
Sus_scrofa___ZNFX1	1.99376	7.56844	23.3226	2.37484e-05	0.00894507	3	7	Up-regulated
Sus_scrofa___MX1	2.80275	7.76249	23.1421	2.50017e-05	0.00923249	3	7	Up-regulated
Sus_scrofa___FMO4	1.65968	7.13891	22.7327	2.86584e-05	0.0103793	3	7	Up-regulated
Sus_scrofa___DDIT4	2.47331	7.13462	22.6566	2.94855e-05	0.0104774	3	7	Up-regulated
Sus_scrofa___ENSSSCG00000017754	2.70387	5.9167	22.1897	3.15511e-05	0.0110037	3	7	Up-regulated
Sus_scrofa___ITPR1	1.39439	10.4187	22.0135	3.59299e-05	0.012303	3	7	Up-regulated
Sus_scrofa___DTX3L	2.79126	5.66735	21.619	3.68186e-05	0.0123822	3	7	Up-regulated
Sus_scrofa___LGALS3BP	2.82196	4.79593	20.8666	3.78741e-05	0.0125137	3	7	Up-regulated
Sus_scrofa___ZMAT3	2.62741	4.88918	20.9063	4.18239e-05	0.013131	3	7	Up-regulated
Sus_scrofa___CCDC194	4.06035	3.95085	20.4289	4.1834e-05	0.013131	3	7	Up-regulated
Sus_scrofa___MAP3K8	1.77587	7.31053	21.4313	4.37956e-05	0.013296	3	7	Up-regulated
Sus_scrofa___TBC1D32	2.24193	6.01285	21.0837	4.78379e-05	0.014077	3	7	Up-regulated
Sus_scrofa___DDX60	2.93142	6.6376	20.3385	4.93347e-05	0.0142942	3	7	Up-regulated
Sus_scrofa___CEP70	2.07256	5.77881	20.5842	5.12631e-05	0.0144748	3	7	Up-regulated
Sus_scrofa___ISG15	3.13587	6.74321	20.4636	5.14955e-05	0.0144748	3	7	Up-regulated
Sus_scrofa___ENSSSCG00000016868	1.85645	7.50198	20.7533	5.44276e-05	0.0146467	3	7	Up-regulated
Sus_scrofa___GSPT2	3.76623	4.25373	20.1206	5.56231e-05	0.0146467	3	7	Up-regulated
Sus_scrofa___HERC5	3.23531	7.52034	20.0576	6.94285e-05	0.0167634	3	7	Up-regulated
Sus_scrofa___ENSSSCG00000014565	2.71755	6.42237	19.6798	7.88385e-05	0.0185596	3	7	Up-regulated
Sus_scrofa___TXNIP	2.01371	7.61727	19.4415	8.54384e-05	0.0196227	3	7	Up-regulated
Sus_scrofa___ENSSSCG00000013260	2.69886	4.30942	18.1544	8.73685e-05	0.0198242	3	7	Up-regulated
Sus_scrofa___CMPK2	2.99685	6.0547	18.5799	9.25204e-05	0.0207433	3	7	Up-regulated
Sus_scrofa___PLSCR1	1.90492	6.88387	18.9578	0.000101341	0.0224536	3	7	Up-regulated
Sus_scrofa___IFI44L	2.3151	7.67128	18.815	0.000106218	0.0232184	3	7	Up-regulated
Sus_scrofa___STAT1	1.5503	8.35444	18.2512	0.000128759	0.0266474	3	7	Up-regulated
Sus_scrofa___HSPA5	2.24565	5.60119	17.5527	0.000140468	0.0275565	3	7	Up-regulated
Sus_scrofa___B2M	1.31006	8.00542	17.9173	0.000144854	0.0278371	3	7	Up-regulated
Sus_scrofa___SETX	1.6398	8.35764	17.4808	0.000169157	0.0312327	3	7	Up-regulated
Sus_scrofa___CHSY1	1.51203	8.06624	17.3393	0.000178293	0.0326	3	7	Up-regulated
Sus_scrofa___FBLN5	1.91065	7.42901	17.2856	0.000182292	0.0328019	3	7	Up-regulated
Sus_scrofa___ZC3HAV1	1.91352	6.92603	17.2791	0.000182881	0.0328019	3	7	Up-regulated
Sus_scrofa___RPL28	2.02128	5.91059	16.9931	0.00020182	0.0358573	3	7	Up-regulated
Sus_scrofa___IFIT1	2.51784	6.13678	16.7849	0.00021089	0.0364375	3	7	Up-regulated
Sus_scrofa___FKBP5	1.50804	9.42322	16.7807	0.000217449	0.0372292	3	7	Up-regulated
Sus_scrofa___C9orf85	2.03594	5.05572	16.3524	0.000224841	0.0378073	3	7	Up-regulated
Sus_scrofa___PTPRE	1.64524	8.40599	16.626	0.000230172	0.0383614	3	7	Up-regulated
Sus_scrofa___CDC42EP2	3.25085	4.37274	15.811	0.000233149	0.0385167	3	7	Up-regulated
Sus_scrofa___PID1	1.88552	10.5165	16.5379	0.000237458	0.0388873	3	7	Up-regulated
Sus_scrofa___EPSTI1	2.22726	7.58418	16.1418	0.000275808	0.0432417	3	7	Up-regulated
Sus_scrofa___PARP14	2.84259	6.51989	15.9895	0.000277823	0.0432417	3	7	Up-regulated
Sus_scrofa___KIAA1755	1.46917	7.07746	15.8634	0.000305735	0.0456977	3	7	Up-regulated
Sus_scrofa___UNC93B1	2.70346	4.26	14.8938	0.000324634	0.0481404	3	7	Up-regulated
Sus_scrofa___IFIT5	2.44529	5.59028	15.4146	0.000339353	0.0493383	3	7	Up-regulated
Sus_scrofa___PCDH7	-6.00695	8.63444	43.9444	6.49495e-08	0.000592005	3	7	Down-regulated
Sus_scrofa___TMEFF2	-8.25737	6.63554	39.0719	3.55704e-07	0.00086432	3	7	Down-regulated
Sus_scrofa___CDH2	-7.16915	8.031	35.5628	6.12738e-07	0.00115397	3	7	Down-regulated
Sus_scrofa___DMD	-2.98289	10.5712	34.9011	8.17639e-07	0.00139987	3	7	Down-regulated
Sus_scrofa___RYR2	-3.63856	10.6142	32.3733	1.61903e-06	0.00234547	3	7	Down-regulated
Sus_scrofa___FHOD3	-4.96752	8.37767	31.0592	2.12896e-06	0.00260631	3	7	Down-regulated
Sus_scrofa___THRB	-3.06345	7.45995	30.9749	2.35264e-06	0.00260631	3	7	Down-regulated
Sus_scrofa___MYOZ2	-5.4799	7.68234	29.7456	2.84752e-06	0.00276361	3	7	Down-regulated
Sus_scrofa___CTNNA3	-2.514	10.0405	29.8454	3.2865e-06	0.00294737	3	7	Down-regulated
Sus_scrofa___CREB5	-2.63974	8.89719	28.979	4.22899e-06	0.00357936	3	7	Down-regulated
Sus_scrofa___RCAN2	-2.04831	10.0264	28.8552	4.37134e-06	0.00357936	3	7	Down-regulated
Sus_scrofa___MYO10	-2.69875	7.60666	28.5024	4.80667e-06	0.00377183	3	7	Down-regulated
Sus_scrofa___ASPDH	-6.3998	7.67582	27.9427	5.30275e-06	0.00399467	3	7	Down-regulated
Sus_scrofa___PPM1E	-5.3258	7.35944	26.4908	7.44102e-06	0.00538518	3	7	Down-regulated
Sus_scrofa___ATP2A2	-2.72917	8.16554	26.5607	8.6433e-06	0.00581354	3	7	Down-regulated
Sus_scrofa___NEXN	-5.60255	7.83226	25.0312	1.17551e-05	0.00629032	3	7	Down-regulated
Sus_scrofa___MPP7	-7.42085	6.41612	25.976	1.1971e-05	0.00629032	3	7	Down-regulated
Sus_scrofa___PDE4D	-2.91492	10.2036	25.4705	1.20242e-05	0.00629032	3	7	Down-regulated
Sus_scrofa___ENSSSCG00000040109	-7.87272	6.64979	25.6627	1.28896e-05	0.00639211	3	7	Down-regulated
Sus_scrofa___SLC8A1	-1.71852	11.1155	25.2396	1.28976e-05	0.00639211	3	7	Down-regulated
Sus_scrofa___ENSSSCG00000010212	-3.83211	8.14336	25.044	1.36054e-05	0.00657002	3	7	Down-regulated
Sus_scrofa___MYH6	-5.66194	5.70799	23.5363	1.46271e-05	0.00684308	3	7	Down-regulated
Sus_scrofa___MYBPC3	-6.42126	8.07933	24.5031	1.52383e-05	0.00684308	3	7	Down-regulated
Sus_scrofa___FHL2	-4.12156	7.9697	24.4935	1.56243e-05	0.00684308	3	7	Down-regulated
Sus_scrofa___ENSSSCG00000010626	-6.15732	8.09766	23.9265	1.67342e-05	0.00716262	3	7	Down-regulated
Sus_scrofa___MLIP	-4.52452	8.26368	23.5123	2.13388e-05	0.00873637	3	7	Down-regulated
Sus_scrofa___NAV2	-2.52546	8.05334	23.4367	2.27627e-05	0.00894507	3	7	Down-regulated
Sus_scrofa___ACTN2	-5.54883	8.19683	23.1565	2.2972e-05	0.00894507	3	7	Down-regulated
Sus_scrofa___PDE4DIP	-4.79084	7.44445	21.3832	3.90349e-05	0.0126749	3	7	Down-regulated
Sus_scrofa___ENSSSCG00000009125	-2.83816	7.40621	21.3138	4.4459e-05	0.013296	3	7	Down-regulated
Sus_scrofa___TECRL	-7.79053	6.50965	21.6517	4.44776e-05	0.013296	3	7	Down-regulated
Sus_scrofa___TMEM164	-4.5132	6.93529	20.398	5.4756e-05	0.0146467	3	7	Down-regulated
Sus_scrofa___TTN	-3.3301	11.694	20.7221	5.50881e-05	0.0146467	3	7	Down-regulated
Sus_scrofa___MAGI2	-3.59833	6.94173	20.4865	5.67604e-05	0.0146467	3	7	Down-regulated
Sus_scrofa___ROBO2	-1.89979	7.72002	20.6407	5.67732e-05	0.0146467	3	7	Down-regulated
Sus_scrofa___FILIP1	-2.72097	8.62919	20.5652	5.81851e-05	0.0148081	3	7	Down-regulated
Sus_scrofa___MYOCD	-3.85108	6.93044	20.0827	6.30082e-05	0.0156337	3	7	Down-regulated
Sus_scrofa___SGCD	-7.47195	6.36765	20.6377	6.31444e-05	0.0156337	3	7	Down-regulated
Sus_scrofa___COL3A1	-2.24373	7.85587	20.2864	6.39196e-05	0.0156337	3	7	Down-regulated
Sus_scrofa___ENSSSCG00000036669	-2.55998	5.87758	19.6661	7.47167e-05	0.0178119	3	7	Down-regulated
Sus_scrofa___EDA	-1.97805	7.13248	19.5336	8.27627e-05	0.0192428	3	7	Down-regulated
Sus_scrofa___NRAP	-5.65472	7.36677	18.4839	0.000107259	0.0232184	3	7	Down-regulated
Sus_scrofa___ADCY5	-3.17581	7.54868	18.6344	0.000112025	0.0239746	3	7	Down-regulated
Sus_scrofa___MYOM1	-3.97059	6.72012	18.2488	0.00011942	0.0252701	3	7	Down-regulated
Sus_scrofa___UCK2	-4.29505	5.92573	18.1308	0.000122101	0.0255503	3	7	Down-regulated
Sus_scrofa___SOX6	-3.12002	7.40687	18.1009	0.000134384	0.0275094	3	7	Down-regulated
Sus_scrofa___ARHGEF28	-5.11247	6.15617	17.9342	0.000138939	0.0275565	3	7	Down-regulated
Sus_scrofa___MAMDC2	-7.16701	5.71768	18.25	0.000139476	0.0275565	3	7	Down-regulated
Sus_scrofa___ST6GALNAC3	-2.84934	6.67839	17.7884	0.000140093	0.0275565	3	7	Down-regulated
Sus_scrofa___SORBS1	-1.9926	9.40007	17.9649	0.00014232	0.0276321	3	7	Down-regulated
Sus_scrofa___LMO7	-5.265	6.39175	17.5915	0.000156372	0.0297471	3	7	Down-regulated
Sus_scrofa___PPARA	-5.72422	6.37178	17.4637	0.000164225	0.0309285	3	7	Down-regulated
Sus_scrofa___SLC16A7	-3.91774	6.26271	17.2335	0.000168494	0.0312327	3	7	Down-regulated
Sus_scrofa___TENM2	-8.06402	6.6369	17.1317	0.000207817	0.0364375	3	7	Down-regulated
Sus_scrofa___STAU2	-3.25619	6.33339	16.7338	0.000209205	0.0364375	3	7	Down-regulated
Sus_scrofa___SAMD4A	-1.61446	9.09432	16.7181	0.000222464	0.0377447	3	7	Down-regulated
Sus_scrofa___PDZRN4	-2.0111	9.1596	16.3316	0.000256205	0.0415958	3	7	Down-regulated
Sus_scrofa___EPB41L3	-3.50307	6.52623	16.0623	0.000261529	0.0420509	3	7	Down-regulated
Sus_scrofa___ABLIM1	-2.43212	9.75765	16.2546	0.000263474	0.0420509	3	7	Down-regulated
Sus_scrofa___CORIN	-7.1173	6.3055	16.1207	0.000274225	0.0432417	3	7	Down-regulated
Sus_scrofa___RETREG1	-5.63132	6.60593	15.9469	0.000285949	0.0441417	3	7	Down-regulated
Sus_scrofa___FHL1	-2.4498	6.74594	15.973	0.000289995	0.0444022	3	7	Down-regulated
Sus_scrofa___NEBL	-3.24736	9.27	15.9488	0.000295138	0.0448253	3	7	Down-regulated
Sus_scrofa___PLD1	-3.38576	7.25422	15.8426	0.000298545	0.04498	3	7	Down-regulated
Sus_scrofa___KIF26B	-3.39421	7.41879	15.5417	0.000336185	0.0493383	3	7	Down-regulated
Sus_scrofa___PHLDB2	-1.67106	8.29284	15.5617	0.000340572	0.0493383	3	7	Down-regulated
Sus_scrofa___PPP1R12B	-2.35971	7.65568	15.5178	0.000346142	0.0497625	3	7	Down-regulated

## Sheet: Resident Immune
Gene	logFC	logCPM	F	PValue	FDR	Observations_PCMV	Observations_Standard	level
pCMV_____gp45	10.6875	7.37412	42.9218	1.3999e-08	0.000211245	3	7	Up-regulated
Sus_scrofa___PTK2B	9.8528	8.39484	32.7351	2.44364e-07	0.00122915	3	7	Up-regulated
Sus_scrofa___NAGK	4.7575	7.48992	30.941	3.47476e-07	0.00123402	3	7	Up-regulated
Sus_scrofa___SAMSN1	4.61109	9.03253	30.0686	4.08887e-07	0.00123402	3	7	Up-regulated
Sus_scrofa___SPP1	5.26075	7.21567	29.7566	5.31359e-07	0.00133637	3	7	Up-regulated
Sus_scrofa___ENSSSCG00000026043	10.6978	8.9983	29.5903	6.45351e-07	0.00139119	3	7	Up-regulated
Sus_scrofa___RESF1	4.43761	8.76542	28.5778	7.62637e-07	0.00143852	3	7	Up-regulated
Sus_scrofa___HERC6	4.59217	9.32613	28.0021	9.60791e-07	0.00160117	3	7	Up-regulated
Sus_scrofa___EPSTI1	4.51259	8.58581	27.3669	1.20161e-06	0.00160117	3	7	Up-regulated
pCMV_____gp50	9.27028	6.0606	28.6465	1.41016e-06	0.00160117	3	7	Up-regulated
Sus_scrofa___ISG15	9.43072	7.78995	27.5862	1.47569e-06	0.00160117	3	7	Up-regulated
Sus_scrofa___FBXW11	4.17291	8.21311	26.6512	1.68771e-06	0.00160117	3	7	Up-regulated
Sus_scrofa___ENSSSCG00000020967	9.03962	7.85269	27.2153	1.70156e-06	0.00160117	3	7	Up-regulated
Sus_scrofa___ENSSSCG00000034570	4.40926	7.89783	26.3694	1.80383e-06	0.00160117	3	7	Up-regulated
pCMV_____gp25	9.26199	6.01302	27.4935	2.11778e-06	0.00167416	3	7	Up-regulated
Sus_scrofa___HERC5	4.37432	8.4432	25.8296	2.20316e-06	0.00167416	3	7	Up-regulated
Sus_scrofa___TENT2	3.47926	9.14532	25.9015	2.3724e-06	0.00170474	3	7	Up-regulated
pCMV_____gp46	9.36425	6.05811	26.8924	2.62394e-06	0.00172306	3	7	Up-regulated
Sus_scrofa___ENSSSCG00000009240	5.76049	7.47052	25.8354	2.62627e-06	0.00172306	3	7	Up-regulated
pCMV_____gp79	9.07145	5.75221	26.7583	2.75325e-06	0.00173111	3	7	Up-regulated
Sus_scrofa___ACSL5	5.48927	7.61933	25.5773	2.90378e-06	0.00175272	3	7	Up-regulated
pCMV_____gp73	9.15956	6.01635	25.9392	3.69853e-06	0.00214657	3	7	Up-regulated
Sus_scrofa___SDC2	3.51051	10.2251	24.037	5.14015e-06	0.00271641	3	7	Up-regulated
pCMV_____gp78	9.01312	5.76212	25.0058	5.1973e-06	0.00271641	3	7	Up-regulated
Sus_scrofa___DRAM1	4.6706	7.31807	23.8705	5.22041e-06	0.00271641	3	7	Up-regulated
Sus_scrofa___PARP14	5.7928	7.771	23.9962	5.60178e-06	0.00281769	3	7	Up-regulated
Sus_scrofa___ENSSSCG00000014540	3.72167	8.49105	23.3276	6.01957e-06	0.00286592	3	7	Up-regulated
Sus_scrofa___ENSSSCG00000005949	5.41591	7.66249	23.6922	6.07751e-06	0.00286592	3	7	Up-regulated
pCMV_____gp61	8.71311	5.62423	23.923	7.7525e-06	0.00329559	3	7	Up-regulated
Sus_scrofa___ENSSSCG00000040016	3.74555	8.68943	22.6213	7.78492e-06	0.00329559	3	7	Up-regulated
Sus_scrofa___MX2	4.5339	9.51682	22.7269	7.9941e-06	0.00329559	3	7	Up-regulated
Sus_scrofa___USP15	3.10694	9.11533	22.7397	8.16604e-06	0.00329559	3	7	Up-regulated
pCMV_____gp49	9.06334	5.78279	23.7399	8.29904e-06	0.00329559	3	7	Up-regulated
Sus_scrofa___BST2	4.51561	7.04545	22.6309	8.76667e-06	0.00335069	3	7	Up-regulated
Sus_scrofa___SLC11A1	3.61354	9.44521	22.4883	8.88189e-06	0.00335069	3	7	Up-regulated
pCMV_____gp39	9.2294	5.77483	23.3858	9.47273e-06	0.00348643	3	7	Up-regulated
Sus_scrofa___ENSSSCG00000033457	3.95552	7.97014	21.9013	1.05117e-05	0.00361238	3	7	Up-regulated
Sus_scrofa___TUT7	3.45277	10.4436	22.1828	1.07725e-05	0.00361238	3	7	Up-regulated
Sus_scrofa___NRP2	3.54635	8.68412	21.7664	1.14973e-05	0.00377163	3	7	Up-regulated
Sus_scrofa___EIF2AK2	3.62715	8.56235	21.3708	1.34968e-05	0.00433333	3	7	Up-regulated
Sus_scrofa___ENSSSCG00000010954	4.95901	6.75967	21.5526	1.45937e-05	0.00455313	3	7	Up-regulated
pCMV_____gp32	8.51604	5.45967	22.1847	1.49105e-05	0.00455313	3	7	Up-regulated
pCMV_____gp43	8.77272	5.5204	22.1539	1.50866e-05	0.00455313	3	7	Up-regulated
Sus_scrofa___TMEM156	3.78121	7.82182	20.9101	1.61119e-05	0.00471396	3	7	Up-regulated
Sus_scrofa___ENSSSCG00000017146	3.5062	9.51215	21.0258	1.67757e-05	0.00471396	3	7	Up-regulated
Sus_scrofa___IL1RAP	3.98283	7.75147	20.8724	1.68691e-05	0.00471396	3	7	Up-regulated
Sus_scrofa___APP	3.08115	10.7236	20.6314	2.06045e-05	0.00560793	3	7	Up-regulated
Sus_scrofa___RASGEF1B	3.09235	8.21977	20.331	2.08114e-05	0.00560793	3	7	Up-regulated
Sus_scrofa___ATP8B4	4.11954	8.05666	19.9876	2.41822e-05	0.00603602	3	7	Up-regulated
Sus_scrofa___MX1	4.13535	8.08405	19.9512	2.44001e-05	0.00603602	3	7	Up-regulated
Sus_scrofa___KCNK13	3.67027	8.20679	19.7577	2.62107e-05	0.00637935	3	7	Up-regulated
Sus_scrofa___ZNFX1	3.25897	8.28086	19.4842	3.00135e-05	0.00718895	3	7	Up-regulated
pCMV_____gp26	8.58513	5.53129	20.3271	3.05239e-05	0.00719695	3	7	Up-regulated
Sus_scrofa___TBC1D2	7.87385	6.54599	19.6323	3.27475e-05	0.00760245	3	7	Up-regulated
pCMV_____gp24	8.60029	5.40504	19.9905	3.48264e-05	0.00796257	3	7	Up-regulated
pCMV_____gp48	8.71582	5.59616	19.8804	3.63661e-05	0.00819052	3	7	Up-regulated
Sus_scrofa___IFIH1	5.11159	7.68959	19.269	3.74859e-05	0.00831856	3	7	Up-regulated
Sus_scrofa___HMOX1	4.04378	7.78306	18.8598	3.9805e-05	0.00870519	3	7	Up-regulated
Sus_scrofa___TSEN2	3.09257	8.47396	18.7609	4.1553e-05	0.00895765	3	7	Up-regulated
Sus_scrofa___ABCG2	2.7682	8.69494	18.6801	4.40121e-05	0.00935412	3	7	Up-regulated
Sus_scrofa___PPARG	3.19469	8.97721	18.5843	4.50952e-05	0.00945121	3	7	Up-regulated
Sus_scrofa___TFEC	3.45807	8.45784	18.3753	4.68717e-05	0.00968896	3	7	Up-regulated
Sus_scrofa___TNFAIP6	8.53063	6.01166	18.7801	4.7644e-05	0.00971552	3	7	Up-regulated
pCMV_____gp09	8.53009	5.37404	18.9911	5.17106e-05	0.0102673	3	7	Up-regulated
Sus_scrofa___CPQ	3.018	9.2858	18.1863	5.56364e-05	0.0109033	3	7	Up-regulated
Sus_scrofa___ITSN1	3.07936	10.2797	18.1644	5.70332e-05	0.0110337	3	7	Up-regulated
Sus_scrofa___NUP98	3.21	7.9934	17.8792	5.92514e-05	0.011057	3	7	Up-regulated
Sus_scrofa___CD53	4.91864	7.54596	18.1045	5.98071e-05	0.011057	3	7	Up-regulated
Sus_scrofa___STK17A	3.17842	8.27308	17.8452	5.99853e-05	0.011057	3	7	Up-regulated
Sus_scrofa___ENSSSCG00000017791	5.01946	8.01084	18.0929	6.00846e-05	0.011057	3	7	Up-regulated
pCMV_____gp56	8.26668	5.23112	18.4386	6.44958e-05	0.011577	3	7	Up-regulated
Sus_scrofa___BLVRB	4.566	6.36253	17.8584	6.47519e-05	0.011577	3	7	Up-regulated
Sus_scrofa___SETX	3.04213	8.87239	17.7415	6.52116e-05	0.011577	3	7	Up-regulated
Sus_scrofa___JDP2	7.92634	6.75583	17.7889	7.10072e-05	0.0123161	3	7	Up-regulated
Sus_scrofa___ENSSSCG00000013556	8.46234	7.19139	17.7976	7.2156e-05	0.0123731	3	7	Up-regulated
pCMV_____gp33	8.3406	5.27833	18.1079	7.36851e-05	0.0124934	3	7	Up-regulated
Sus_scrofa___FYB1	3.62207	8.48155	17.3294	7.58997e-05	0.0125575	3	7	Up-regulated
Sus_scrofa___RGS1	8.35818	8.00129	17.7257	7.65402e-05	0.0125575	3	7	Up-regulated
Sus_scrofa___PSMB7	7.62021	6.34489	17.6517	7.65598e-05	0.0125575	3	7	Up-regulated
Sus_scrofa___OAS2	3.29379	8.74999	17.3018	7.91645e-05	0.0128451	3	7	Up-regulated
pCMV_____gp52	8.3683	5.30156	17.8359	8.22573e-05	0.0132049	3	7	Up-regulated
Sus_scrofa___ENSSSCG00000017754	3.67314	7.31817	16.973	8.75718e-05	0.0137884	3	7	Up-regulated
Sus_scrofa___MYO1E	2.546	8.98165	17.1237	8.77197e-05	0.0137884	3	7	Up-regulated
Sus_scrofa___CSTB	7.76404	6.50213	17.1085	9.62519e-05	0.0148208	3	7	Up-regulated
Sus_scrofa___ENSSSCG00000015664	8.00581	6.91384	16.9638	9.99983e-05	0.0150952	3	7	Up-regulated
Sus_scrofa___NCF2	2.9081	8.47655	16.7147	0.000100035	0.0150952	3	7	Up-regulated
Sus_scrofa___MGMT	2.56039	8.32113	16.3213	0.000120284	0.017795	3	7	Up-regulated
Sus_scrofa___ENSSSCG00000012202	4.56158	7.22668	16.3431	0.000127349	0.0185139	3	7	Up-regulated
Sus_scrofa___ISG12(A)	3.69014	6.76768	16.1578	0.000127598	0.0185139	3	7	Up-regulated
Sus_scrofa___CASP10	3.34764	7.85108	16.0465	0.000133452	0.0191406	3	7	Up-regulated
Sus_scrofa___ADGRL2	2.56081	9.4885	16.1028	0.000138762	0.0191499	3	7	Up-regulated
Sus_scrofa___ENO1	2.99084	7.99469	15.9264	0.000139585	0.0191499	3	7	Up-regulated
Sus_scrofa___SLC6A6	4.37731	6.87755	16.0816	0.000139595	0.0191499	3	7	Up-regulated
Sus_scrofa___PLXNC1	3.05406	9.01531	15.9191	0.000142785	0.0193345	3	7	Up-regulated
Sus_scrofa___GK5	3.40047	7.78818	15.9106	0.000143503	0.0193345	3	7	Up-regulated
pCMV_____gp17	7.88064	4.96165	16.3846	0.00014909	0.0198758	3	7	Up-regulated
Sus_scrofa___SLC9A8	3.67098	7.05025	15.8726	0.000151	0.0198758	3	7	Up-regulated
Sus_scrofa___FAM76A	3.42401	7.54407	15.7996	0.000151472	0.0198758	3	7	Up-regulated
Sus_scrofa___SAMD9	3.05526	7.76239	15.6973	0.000154853	0.0201443	3	7	Up-regulated
Sus_scrofa___CLEC2B	3.033	7.7281	15.5938	0.000159311	0.0205471	3	7	Up-regulated
Sus_scrofa___PFDN1	3.34171	7.48733	15.6551	0.000160991	0.0205877	3	7	Up-regulated
Sus_scrofa___SDSL	7.69537	5.21505	15.8311	0.000167309	0.021031	3	7	Up-regulated
Sus_scrofa___PTPN1	2.86932	7.83904	15.5166	0.000167343	0.021031	3	7	Up-regulated
Sus_scrofa___ENSSSCG00000028679	4.33295	6.93334	15.7225	0.000168638	0.021031	3	7	Up-regulated
Sus_scrofa___ENSSSCG00000001229	2.55505	9.3582	15.478	0.000180782	0.0223606	3	7	Up-regulated
Sus_scrofa___FTL	4.75743	7.47748	15.5207	0.000184202	0.0225985	3	7	Up-regulated
Sus_scrofa___VAV3	2.96014	11.0214	15.4083	0.00018858	0.0229489	3	7	Up-regulated
Sus_scrofa___FAM13A	2.5343	9.46039	15.306	0.000193571	0.0233679	3	7	Up-regulated
Sus_scrofa___SLC18A1	3.11217	7.80271	14.9837	0.000209492	0.0249446	3	7	Up-regulated
Sus_scrofa___FAM126B	2.83705	7.88914	15.0207	0.000209938	0.0249446	3	7	Up-regulated
Sus_scrofa___RCOR1	2.41983	8.85141	15.0835	0.000212059	0.0249998	3	7	Up-regulated
Sus_scrofa___ENSSSCG00000035904	4.33939	6.8554	15.1338	0.000217664	0.0254616	3	7	Up-regulated
Sus_scrofa___LCP2	3.05276	8.83003	14.9421	0.000221785	0.0256911	3	7	Up-regulated
pCMV_____gp06	7.91449	4.88597	15.4208	0.000223031	0.0256911	3	7	Up-regulated
Sus_scrofa___CEBPD	7.42554	5.80961	15.062	0.000227661	0.0260257	3	7	Up-regulated
Sus_scrofa___ENSSSCG00000004441	2.82749	8.65428	14.7962	0.000238601	0.0266703	3	7	Up-regulated
Sus_scrofa___ENSSSCG00000033909	3.01776	8.37513	14.6865	0.000243317	0.0269974	3	7	Up-regulated
Sus_scrofa___SLTM	3.0537	7.53632	14.5955	0.000255617	0.0281552	3	7	Up-regulated
Sus_scrofa___MLXIP	2.85284	8.76589	14.5649	0.000257903	0.0282011	3	7	Up-regulated
Sus_scrofa___RBM47	2.81268	10.1335	14.6069	0.000265584	0.0284863	3	7	Up-regulated
Sus_scrofa___IFI44	3.25587	7.52765	14.457	0.000269681	0.0284863	3	7	Up-regulated
Sus_scrofa___CMPK2	8.09628	6.44082	14.7158	0.000269943	0.0284863	3	7	Up-regulated
Sus_scrofa___ENSSSCG00000014565	3.85522	6.80771	14.5033	0.000275827	0.0284863	3	7	Up-regulated
Sus_scrofa___BNIP3L	3.03457	7.23514	14.4198	0.000275969	0.0284863	3	7	Up-regulated
Sus_scrofa___PFKFB3	2.69321	8.67446	14.4378	0.000277118	0.0284863	3	7	Up-regulated
Sus_scrofa___DPP8	3.27913	7.85825	14.4346	0.000277501	0.0284863	3	7	Up-regulated
Sus_scrofa___TENT5A	4.02174	7.21495	14.4679	0.000281932	0.0287186	3	7	Up-regulated
Sus_scrofa___NCKAP1L	3.32679	8.14634	14.3393	0.00028357	0.0287186	3	7	Up-regulated
Sus_scrofa___NMI	7.58276	6.58993	14.5195	0.000289951	0.029169	3	7	Up-regulated
pCMV_____gp67	7.93766	4.94761	14.7101	0.00030139	0.0298689	3	7	Up-regulated
Sus_scrofa___RAB7B	3.54854	6.44898	14.246	0.000302846	0.0298689	3	7	Up-regulated
Sus_scrofa___ERC1	2.49952	8.92488	14.2262	0.000308929	0.0302711	3	7	Up-regulated
pCMV_____gp57	8.12821	5.02644	14.6206	0.000313154	0.030487	3	7	Up-regulated
Sus_scrofa___PSMB8	7.6205	6.1183	14.3159	0.000316451	0.0306023	3	7	Up-regulated
Sus_scrofa___MARCHF1	3.01641	10.3691	14.2123	0.000318393	0.0306023	3	7	Up-regulated
Sus_scrofa___FMN1	3.09223	8.51755	14.0526	0.000321137	0.0306706	3	7	Up-regulated
Sus_scrofa___IGF2BP3	2.46039	8.66093	14.0666	0.000330187	0.0312377	3	7	Up-regulated
Sus_scrofa___PIK3AP1	2.51855	8.91433	14.1032	0.000331214	0.0312377	3	7	Up-regulated
pCMV_____gp62	7.73594	4.86266	14.4569	0.000335739	0.0314677	3	7	Up-regulated
Sus_scrofa___ESCO1	3.07195	7.65374	13.9722	0.000343264	0.0319744	3	7	Up-regulated
Sus_scrofa___C3orf70	7.6032	6.17831	14.11	0.000349473	0.0320502	3	7	Up-regulated
Sus_scrofa___SLC38A6	3.58239	7.29815	13.9655	0.000350811	0.0320502	3	7	Up-regulated
Sus_scrofa___PIK3R1	2.58594	9.20259	13.9407	0.000354877	0.0320502	3	7	Up-regulated
Sus_scrofa___RNF114	3.46653	7.05233	13.8766	0.000357801	0.0320502	3	7	Up-regulated
Sus_scrofa___CDK6	2.2591	9.17232	13.9424	0.000358164	0.0320502	3	7	Up-regulated
Sus_scrofa___FKBP5	2.63758	11.2491	13.97	0.000358164	0.0320502	3	7	Up-regulated
Sus_scrofa___NRBF2	7.23163	5.94779	14.043	0.000361069	0.0320502	3	7	Up-regulated
Sus_scrofa___OGFRL1	2.73144	8.67509	13.8365	0.000367055	0.0320786	3	7	Up-regulated
pCMV_____gp03	7.57952	4.84967	14.2418	0.000368101	0.0320786	3	7	Up-regulated
Sus_scrofa___MACROH2A1	2.69214	8.19004	13.7679	0.000368921	0.0320786	3	7	Up-regulated
pCMV_____gp35	7.93192	4.83018	14.2314	0.000369892	0.0320786	3	7	Up-regulated
Sus_scrofa___IFI44L	3.08155	7.89241	13.7335	0.000374902	0.0323273	3	7	Up-regulated
Sus_scrofa___FGGY	2.49993	8.34851	13.715	0.000385491	0.032799	3	7	Up-regulated
Sus_scrofa___RHBDF2	7.50141	6.71932	13.8754	0.000386153	0.032799	3	7	Up-regulated
Sus_scrofa___SEPTIN2	7.25829	6.69076	13.8838	0.000390519	0.0329214	3	7	Up-regulated
Sus_scrofa___GAB2	2.47483	10.4864	13.7211	0.000400366	0.0334391	3	7	Up-regulated
Sus_scrofa___TTF2	7.42931	7.11564	13.7682	0.000408271	0.033511	3	7	Up-regulated
Sus_scrofa___PSMD1	2.75088	7.8125	13.531	0.000411163	0.033511	3	7	Up-regulated
Sus_scrofa___ZC3H12C	3.39854	7.48062	13.5774	0.000411845	0.033511	3	7	Up-regulated
Sus_scrofa___STX11	2.99026	7.3611	13.5219	0.000412929	0.033511	3	7	Up-regulated
Sus_scrofa___ENSSSCG00000035811	7.34038	6.07532	13.7121	0.00041569	0.033511	3	7	Up-regulated
Sus_scrofa___MFSD11	7.36851	6.57031	13.733	0.00041681	0.033511	3	7	Up-regulated
Sus_scrofa___SOAT1	2.78981	7.92035	13.4786	0.000420119	0.033511	3	7	Up-regulated
Sus_scrofa___VAPB	2.6928	8.19628	13.4628	0.000424833	0.033511	3	7	Up-regulated
Sus_scrofa___EHD4	2.63189	8.56255	13.5088	0.000425372	0.033511	3	7	Up-regulated
Sus_scrofa___TLE3	7.27546	6.66286	13.6407	0.000426383	0.033511	3	7	Up-regulated
Sus_scrofa___FAM168B	3.41512	7.28144	13.5176	0.000432201	0.0336754	3	7	Up-regulated
Sus_scrofa___ID2	7.20631	5.93074	13.6065	0.000433979	0.0336754	3	7	Up-regulated
Sus_scrofa___ZNF618	2.71876	8.21583	13.4188	0.000436229	0.0336754	3	7	Up-regulated
Sus_scrofa___TRIM33	2.90674	7.84513	13.4092	0.000437401	0.0336754	3	7	Up-regulated
Sus_scrofa___HK3	7.3529	6.31858	13.5775	0.000439727	0.0336826	3	7	Up-regulated
Sus_scrofa___TNIP1	3.02827	7.54674	13.3319	0.000451324	0.0343964	3	7	Up-regulated
Sus_scrofa___AASDH	3.50939	6.96973	13.3656	0.000462911	0.0351022	3	7	Up-regulated
Sus_scrofa___RSAD2	4.91877	7.63737	13.4107	0.000465559	0.0351265	3	7	Up-regulated
Sus_scrofa___SMCHD1	2.45339	9.32594	13.2937	0.000479598	0.0358274	3	7	Up-regulated
Sus_scrofa___INPP4A	2.64623	8.44369	13.1337	0.000492313	0.036596	3	7	Up-regulated
Sus_scrofa___ENSSSCG00000050398	3.51098	6.72627	13.1747	0.00049728	0.0367841	3	7	Up-regulated
Sus_scrofa___KIF21B	7.43147	6.6787	13.2791	0.000508809	0.0374533	3	7	Up-regulated
Sus_scrofa___MORC3	2.47073	7.96114	13.0206	0.000523786	0.038186	3	7	Up-regulated
Sus_scrofa___DPH6	2.74761	7.26693	13.0062	0.000523824	0.038186	3	7	Up-regulated
Sus_scrofa___RAC1	2.6654	7.9834	12.995	0.000526749	0.0382146	3	7	Up-regulated
Sus_scrofa___ENSSSCG00000025674	7.12074	6.32348	13.1495	0.000540437	0.0388027	3	7	Up-regulated
Sus_scrofa___PPP3CA	2.25236	9.93933	13.0436	0.000542336	0.0388027	3	7	Up-regulated
Sus_scrofa___FMNL3	2.47171	7.84538	12.9481	0.000542569	0.0388027	3	7	Up-regulated
Sus_scrofa___ADAR	2.9468	7.02008	12.9203	0.000548042	0.0389414	3	7	Up-regulated
Sus_scrofa___KYNU	2.74189	8.87473	12.8671	0.000567827	0.0393488	3	7	Up-regulated
Sus_scrofa___TXNIP	2.74613	8.66524	12.839	0.000568458	0.0393488	3	7	Up-regulated
Sus_scrofa___MTAP	7.30122	6.22685	12.9323	0.000586562	0.0404165	3	7	Up-regulated
Sus_scrofa___BCL2A1	7.38753	5.69539	12.9401	0.000593196	0.0406878	3	7	Up-regulated
Sus_scrofa___SEL1L3	3.45767	6.36801	12.7702	0.00060004	0.0407865	3	7	Up-regulated
Sus_scrofa___SNX10	2.78669	7.68794	12.6685	0.000610832	0.0413339	3	7	Up-regulated
Sus_scrofa___STX12	3.21123	7.7331	12.6751	0.000622696	0.0417621	3	7	Up-regulated
Sus_scrofa___PSMD14	2.73683	7.27943	12.6084	0.000630036	0.0419364	3	7	Up-regulated
Sus_scrofa___PRDX1	3.98609	6.22414	12.7291	0.000630853	0.0419364	3	7	Up-regulated
Sus_scrofa___TEP1	7.32046	6.13569	12.7362	0.000648371	0.0429103	3	7	Up-regulated
Sus_scrofa___ENSSSCG00000051054	2.90779	7.79624	12.4922	0.00065986	0.0429103	3	7	Up-regulated
pCMV_____gp34	7.61344	4.79426	12.8982	0.000660064	0.0429103	3	7	Up-regulated
Sus_scrofa___BMP2K	2.49576	9.14104	12.5532	0.000660147	0.0429103	3	7	Up-regulated
Sus_scrofa___ARL8B	2.98419	7.75693	12.5289	0.000664978	0.0429103	3	7	Up-regulated
Sus_scrofa___TBXAS1	3.34368	7.9121	12.511	0.000667699	0.0429103	3	7	Up-regulated
Sus_scrofa___PXK	2.60109	8.18703	12.497	0.000668253	0.0429103	3	7	Up-regulated
Sus_scrofa___UNC93B1	2.90358	7.48694	12.4284	0.000678017	0.0432819	3	7	Up-regulated
Sus_scrofa___RAD51B	2.15627	9.37449	12.542	0.000679776	0.0432819	3	7	Up-regulated
Sus_scrofa___SMG1	2.41479	8.17229	12.4344	0.000688185	0.0436332	3	7	Up-regulated
Sus_scrofa___TNFSF4	2.59346	7.37395	12.4058	0.000691724	0.0436741	3	7	Up-regulated
Sus_scrofa___ZBP1	4.53901	6.60972	12.4995	0.000699289	0.0439678	3	7	Up-regulated
Sus_scrofa___ENSSSCG00000036556	2.26765	9.06693	12.4114	0.000712139	0.0444395	3	7	Up-regulated
pCMV_____gp68	7.79514	4.8768	12.7245	0.000712681	0.0444395	3	7	Up-regulated
Sus_scrofa___USP10	3.02045	7.41628	12.3233	0.000730696	0.045309	3	7	Up-regulated
Sus_scrofa___SCFD2	2.5147	8.5955	12.3217	0.00073263	0.045309	3	7	Up-regulated
Sus_scrofa___TLR2	3.10165	7.73747	12.2416	0.000760417	0.0468355	3	7	Up-regulated
Sus_scrofa___KLF6	2.88719	7.41061	12.1992	0.000765529	0.0469587	3	7	Up-regulated
Sus_scrofa___EDNRB	4.09466	6.57217	12.2673	0.0007726	0.0472006	3	7	Up-regulated
Sus_scrofa___ETNK1	3.00443	7.58226	12.1641	0.000777609	0.047315	3	7	Up-regulated
Sus_scrofa___RIOK3	3.32126	7.05795	12.2113	0.000786442	0.0476206	3	7	Up-regulated
Sus_scrofa___ATP6V1B2	2.86348	7.28085	12.1238	0.000788942	0.0476206	3	7	Up-regulated
Sus_scrofa___RASSF3	2.38355	9.20733	12.1472	0.000808006	0.0484214	3	7	Up-regulated
Sus_scrofa___PLEK	2.66763	7.57404	12.0666	0.000810731	0.0484214	3	7	Up-regulated
Sus_scrofa___LMBRD2	7.08604	5.97545	12.2289	0.000815244	0.0484214	3	7	Up-regulated
Sus_scrofa___CGAS	3.20623	6.71413	12.0676	0.000815536	0.0484214	3	7	Up-regulated
Sus_scrofa___NLRC5	2.84005	8.3242	12.0456	0.000819523	0.0484214	3	7	Up-regulated
Sus_scrofa___PLSCR1	3.39441	6.5099	12.1134	0.000821463	0.0484214	3	7	Up-regulated
Sus_scrofa___TCF7L2	2.29762	9.06088	12.0636	0.000838573	0.049152	3	7	Up-regulated
Sus_scrofa___POR	3.06231	6.93173	12.0126	0.000841928	0.049152	3	7	Up-regulated
Sus_scrofa___MARCKS	3.66498	7.26107	12.0756	0.000847575	0.049152	3	7	Up-regulated
Sus_scrofa___BACH1	2.34566	7.98543	12.0008	0.000852341	0.049152	3	7	Up-regulated
Sus_scrofa___NRP1	2.42391	10.4117	12.0591	0.000852726	0.049152	3	7	Up-regulated
Sus_scrofa___FOXS1	3.59881	6.51503	12.0045	0.000853401	0.049152	3	7	Up-regulated
Sus_scrofa___MGAT4A	2.23113	9.61881	12.0132	0.0008651	0.049244	3	7	Up-regulated
Sus_scrofa___HBEGF	7.7747	6.33592	12.1102	0.0008664	0.049244	3	7	Up-regulated
Sus_scrofa___F13A1	2.9467	11.0146	11.9969	0.000867299	0.049244	3	7	Up-regulated
Sus_scrofa___MAML2	2.26433	10.3486	12.026	0.000868052	0.049244	3	7	Up-regulated
Sus_scrofa___ABCG1	7.30903	5.9675	12.064	0.000872901	0.0493336	3	7	Up-regulated
Sus_scrofa___SYK	2.5152	8.87636	11.9308	0.000877652	0.049417	3	7	Up-regulated
Sus_scrofa___NOTCH2	2.32708	8.93623	11.9201	0.000886688	0.049503	3	7	Up-regulated
Sus_scrofa___SRP72	3.83706	6.93469	12.0074	0.00088844	0.049503	3	7	Up-regulated
Sus_scrofa___AFF4	2.10222	8.41578	11.9169	0.00088902	0.049503	3	7	Up-regulated
Sus_scrofa___USP42	6.8897	5.99621	12.0309	0.000894934	0.0496491	3	7	Up-regulated
pCMV_____gp04	7.37175	4.64563	12.2011	0.000898343	0.0496556	3	7	Up-regulated
Sus_scrofa___MYH6	-7.36721	7.04544	34.2712	1.01656e-07	0.000766992	3	7	Down-regulated
Sus_scrofa___GRIK2	-6.06518	7.84467	26.4741	1.75762e-06	0.00160117	3	7	Down-regulated
Sus_scrofa___GALNT13	-6.53965	5.89495	26.562	1.77954e-06	0.00160117	3	7	Down-regulated
Sus_scrofa___ACTC1	-8.34893	5.99915	25.9668	2.2189e-06	0.00167416	3	7	Down-regulated
Sus_scrofa___ENSSSCG00000010626	-4.5048	9.56952	23.384	6.79188e-06	0.00310574	3	7	Down-regulated
Sus_scrofa___TENM2	-5.53309	7.66782	22.2257	1.0313e-05	0.00361238	3	7	Down-regulated
Sus_scrofa___ENSSSCG00000015795	-7.81263	4.81748	21.9216	1.07022e-05	0.00361238	3	7	Down-regulated
Sus_scrofa___CMTM5	-7.56417	5.03907	20.9236	1.67534e-05	0.00471396	3	7	Down-regulated
Sus_scrofa___RGS6	-5.6854	7.21743	20.3953	2.18319e-05	0.00577972	3	7	Down-regulated
Sus_scrofa___ENSSSCG00000035789	-6.72321	7.94799	20.1981	2.38607e-05	0.00603602	3	7	Down-regulated
Sus_scrofa___RNF180	-4.90212	7.05517	20.0907	2.4341e-05	0.00603602	3	7	Down-regulated
Sus_scrofa___PCP4	-4.89033	6.56392	18.3575	4.84559e-05	0.00974933	3	7	Down-regulated
Sus_scrofa___KIAA1549L	-5.31994	5.65698	17.6327	6.61151e-05	0.0116009	3	7	Down-regulated
Sus_scrofa___SLCO6A1	-4.62018	6.57952	16.8408	9.61808e-05	0.0148208	3	7	Down-regulated
Sus_scrofa___GADL1	-5.55222	5.00692	16.2356	0.000119892	0.017795	3	7	Down-regulated
Sus_scrofa___CFAP300	-7.27653	5.11056	15.9596	0.000134454	0.0191406	3	7	Down-regulated
Sus_scrofa___COL23A1	-4.48649	6.07197	15.9918	0.00013815	0.0191499	3	7	Down-regulated
Sus_scrofa___SMOC1	-5.11095	5.53721	14.8232	0.000229882	0.0260821	3	7	Down-regulated
Sus_scrofa___C2CD6	-4.04974	6.03165	14.7982	0.000234488	0.0264062	3	7	Down-regulated
Sus_scrofa___EFS	-6.97513	4.43039	14.4372	0.000269541	0.0284863	3	7	Down-regulated
Sus_scrofa___FHL2	-3.46994	8.8673	14.5796	0.000272576	0.0284863	3	7	Down-regulated
Sus_scrofa___KLHL3	-4.03351	6.42471	14.2696	0.000302718	0.0298689	3	7	Down-regulated
Sus_scrofa___STXBP5L	-4.77314	6.04496	13.8165	0.000360459	0.0320502	3	7	Down-regulated
Sus_scrofa___CAMK2A	-4.41849	6.78886	13.6796	0.000386893	0.032799	3	7	Down-regulated
Sus_scrofa___FAM13C	-4.04356	5.60716	13.546	0.000401092	0.0334391	3	7	Down-regulated
Sus_scrofa___FRZB	-6.66832	4.20735	13.4212	0.000422641	0.033511	3	7	Down-regulated
Sus_scrofa___MACC1	-5.0305	4.94595	13.1603	0.00047958	0.0358274	3	7	Down-regulated
Sus_scrofa___ENSSSCG00000012700	-4.6505	5.18357	12.8432	0.000551071	0.0389414	3	7	Down-regulated
Sus_scrofa___ENSSSCG00000036052	-4.29941	7.46826	12.949	0.000552251	0.0389414	3	7	Down-regulated
Sus_scrofa___ADAMTS19	-6.34595	4.3941	12.8245	0.000565616	0.0393488	3	7	Down-regulated
Sus_scrofa___NEB	-4.17976	5.98993	12.8564	0.000566636	0.0393488	3	7	Down-regulated
Sus_scrofa___RNF212B	-6.72731	4.06686	12.7324	0.000596237	0.0407114	3	7	Down-regulated
Sus_scrofa___MARCHF11	-6.69298	3.99606	12.728	0.000615424	0.0414587	3	7	Down-regulated
Sus_scrofa___ENSSSCG00000040253	-6.52778	3.87367	12.5981	0.000667209	0.0429103	3	7	Down-regulated

## Sheet: Vascular EC
Gene	logFC	logCPM	F	PValue	FDR	Observations_PCMV	Observations_Standard	level
Sus_scrofa___UBE2V2	2.3046	7.33651	74.3823	5.53294e-10	8.41938e-06	3	7	Up-regulated
Sus_scrofa___PLSCR4	2.60325	7.58367	72.4541	7.52066e-10	8.41938e-06	3	7	Up-regulated
Sus_scrofa___ENSSSCG00000017103	4.28945	4.97814	61.6187	1.9094e-09	1.19193e-05	3	7	Up-regulated
Sus_scrofa___RGMB	3.41718	8.00264	66.1289	2.1294e-09	1.19193e-05	3	7	Up-regulated
pCMV_____gp26	9.30444	4.61187	86.3534	6.35431e-09	2.36034e-05	3	7	Up-regulated
pCMV_____gp32	9.49577	4.79366	72.4817	7.18091e-09	2.36034e-05	3	7	Up-regulated
pCMV_____gp45	10.6659	5.80874	101.138	7.37937e-09	2.36034e-05	3	7	Up-regulated
Sus_scrofa___MRC1	3.37599	5.66744	57.8143	9.05986e-09	2.53563e-05	3	7	Up-regulated
Sus_scrofa___WFDC1	3.51407	7.43091	56.9157	1.1013e-08	2.73979e-05	3	7	Up-regulated
pCMV_____gp50	8.74967	4.15164	79.0939	1.3492e-08	2.89441e-05	3	7	Up-regulated
Sus_scrofa___PTN	3.02604	4.43627	50.9945	1.422e-08	2.89441e-05	3	7	Up-regulated
pCMV_____gp61	9.45513	4.75776	76.8173	1.71631e-08	3.08972e-05	3	7	Up-regulated
Sus_scrofa___GALNT15	2.88681	6.34929	54.0254	1.87911e-08	3.08972e-05	3	7	Up-regulated
Sus_scrofa___RGS2	3.22864	6.31083	53.2646	1.93194e-08	3.08972e-05	3	7	Up-regulated
pCMV_____gp73	9.47149	4.74658	87.3181	2.29282e-08	3.37708e-05	3	7	Up-regulated
Sus_scrofa___CCN4	7.7094	3.60781	54.1531	2.41328e-08	3.37708e-05	3	7	Up-regulated
Sus_scrofa___DDIT4	2.79358	7.77596	52.1642	2.72791e-08	3.59282e-05	3	7	Up-regulated
pCMV_____gp46	9.13285	4.46362	81.1179	4.01008e-08	4.921e-05	3	7	Up-regulated
pCMV_____gp25	10.244	5.44354	80.6236	4.17592e-08	4.921e-05	3	7	Up-regulated
pCMV_____gp56	8.55395	4.01698	67.9226	4.7915e-08	5.36408e-05	3	7	Up-regulated
pCMV_____gp79	8.02833	3.60563	66.6127	5.614e-08	5.9856e-05	3	7	Up-regulated
pCMV_____gp23	9.00617	4.36418	76.5414	6.19433e-08	6.16693e-05	3	7	Up-regulated
Sus_scrofa___NETO2	3.65789	4.32052	42.7998	6.36302e-08	6.16693e-05	3	7	Up-regulated
pCMV_____gp17	8.59546	4.02728	74.3948	7.67676e-08	6.8753e-05	3	7	Up-regulated
pCMV_____gp68	8.25334	3.78942	63.3045	8.48924e-08	7.31054e-05	3	7	Up-regulated
Sus_scrofa___STC1	3.33763	8.1099	46.1708	9.26953e-08	7.68685e-05	3	7	Up-regulated
pCMV_____gp09	8.50255	3.95814	71.705	1.00741e-07	7.88118e-05	3	7	Up-regulated
pCMV_____gp48	8.81271	4.211	71.5511	1.02079e-07	7.88118e-05	3	7	Up-regulated
pCMV_____gp62	8.17953	3.73728	61.0832	1.12993e-07	8.43301e-05	3	7	Up-regulated
pCMV_____gp43	8.25974	3.77356	68.3305	1.43343e-07	0.000100295	3	7	Up-regulated
pCMV_____gp49	9.80009	5.05804	67.9023	1.48617e-07	0.000100834	3	7	Up-regulated
pCMV_____gp57	8.12275	3.67275	66.2938	1.78381e-07	0.000117469	3	7	Up-regulated
pCMV_____gp65	8.04836	3.61904	65.148	2.02139e-07	0.000129311	3	7	Up-regulated
Sus_scrofa___ENSSSCG00000039658	2.23125	6.70744	42.3483	2.15797e-07	0.000134214	3	7	Up-regulated
pCMV_____gp06	8.21074	3.76937	55.8498	2.29038e-07	0.000134972	3	7	Up-regulated
pCMV_____gp52	8.20156	3.738	63.8948	2.32665e-07	0.000134972	3	7	Up-regulated
Sus_scrofa___TMEM156	3.51993	4.58045	37.4455	2.39031e-07	0.000134972	3	7	Up-regulated
Sus_scrofa___ENSSSCG00000000231	5.96623	3.33698	43.2257	2.56592e-07	0.000134972	3	7	Up-regulated
pCMV_____gp27	7.92068	3.55799	54.2304	2.87181e-07	0.000141906	3	7	Up-regulated
pCMV_____gp33	8.84086	4.24707	61.8828	2.91543e-07	0.000141906	3	7	Up-regulated
pCMV_____gp03	9.40669	4.75073	48.3406	3.00656e-07	0.000143227	3	7	Up-regulated
Sus_scrofa___PLSCR1	1.93049	7.36055	40.595	3.17981e-07	0.000147781	3	7	Up-regulated
pCMV_____gp67	8.56385	4.02608	59.8608	3.69848e-07	0.000165618	3	7	Up-regulated
pCMV_____gp78	7.46852	3.21824	57.6342	4.74153e-07	0.000208162	3	7	Up-regulated
pCMV_____gp14	8.10191	3.67427	57.0658	5.17858e-07	0.000222978	3	7	Up-regulated
pCMV_____gp41	9.08495	4.45389	56.5836	5.47248e-07	0.000231186	3	7	Up-regulated
pCMV_____gp47	7.65676	3.3556	56.2583	5.66656e-07	0.000234952	3	7	Up-regulated
pCMV_____gp24	8.7157	4.15263	55.1956	6.52383e-07	0.000260837	3	7	Up-regulated
pCMV_____gp60	8.14237	3.708	54.5342	7.10354e-07	0.000274993	3	7	Up-regulated
Sus_scrofa___HACD1	3.14963	5.04691	35.9722	7.12355e-07	0.000274993	3	7	Up-regulated
pCMV_____gp04	8.46413	3.95485	53.6606	7.94188e-07	0.000297685	3	7	Up-regulated
pCMV_____gp42	7.80317	3.46313	53.4711	8.09865e-07	0.000297685	3	7	Up-regulated
Sus_scrofa___ABHD17B	1.77954	7.08665	36.2378	8.97105e-07	0.000323971	3	7	Up-regulated
Sus_scrofa___TMCC3	1.79252	8.6669	36.1417	9.11593e-07	0.000323977	3	7	Up-regulated
Sus_scrofa___AGMO	1.96277	8.11484	35.9879	9.48186e-07	0.000328723	3	7	Up-regulated
pCMV_____gp70	7.83466	3.48731	52.2154	9.54309e-07	0.000328723	3	7	Up-regulated
pCMV_____gp35	8.03172	3.66159	42.667	9.82733e-07	0.000332348	3	7	Up-regulated
pCMV_____gp59	8.2546	3.79564	51.9348	9.94521e-07	0.000332348	3	7	Up-regulated
Sus_scrofa___CEBPB	2.4142	4.76534	33.8786	1.13778e-06	0.000374632	3	7	Up-regulated
Sus_scrofa___TPI1	3.00129	4.82357	33.9075	1.27038e-06	0.000400618	3	7	Up-regulated
pCMV_____gp39	8.66914	4.1204	49.7963	1.32216e-06	0.000411155	3	7	Up-regulated
Sus_scrofa___CDKN1A	2.96894	5.21365	33.4809	1.34333e-06	0.000412017	3	7	Up-regulated
pCMV_____gp34	8.08003	3.66931	48.4462	1.59279e-06	0.000459644	3	7	Up-regulated
pCMV_____gp07	7.38263	3.18832	48.1262	1.63148e-06	0.000462391	3	7	Up-regulated
pCMV_____gp40	7.88632	3.52991	47.7961	1.73991e-06	0.000486959	3	7	Up-regulated
pCMV_____gp51	7.17414	3.05856	47.4036	1.78051e-06	0.000492167	3	7	Up-regulated
pCMV_____gp22	7.26114	3.11323	47.0847	1.87515e-06	0.000512008	3	7	Up-regulated
pCMV_____gp18	7.58585	3.32424	46.4203	2.09767e-06	0.00055913	3	7	Up-regulated
pCMV_____gp66	7.58585	3.32424	46.4203	2.09767e-06	0.00055913	3	7	Up-regulated
Sus_scrofa___OSGIN1	2.37634	5.0541	31.8553	2.12385e-06	0.000559448	3	7	Up-regulated
pCMV_____gp31	7.28058	3.12756	45.8906	2.22898e-06	0.000580312	3	7	Up-regulated
Sus_scrofa___SOCS1	6.89963	3.66875	33.3497	2.29627e-06	0.00059096	3	7	Up-regulated
pCMV_____gp38	7.19959	3.07872	45.1876	2.4558e-06	0.000624834	3	7	Up-regulated
Sus_scrofa___CHRNA4	4.4935	3.02314	28.6402	3.2374e-06	0.000796544	3	7	Up-regulated
pCMV_____gp29	7.34796	3.17395	43.2538	3.30745e-06	0.000804933	3	7	Up-regulated
Sus_scrofa___NABP1	2.03348	5.60284	30.6934	3.72819e-06	0.00088816	3	7	Up-regulated
Sus_scrofa___MPC2	2.89152	5.30433	29.9189	3.91934e-06	0.000923726	3	7	Up-regulated
Sus_scrofa___TXNIP	2.37571	8.2482	29.5081	5.06681e-06	0.00113446	3	7	Up-regulated
Sus_scrofa___CCSER2	1.69492	7.6684	29.3383	5.31727e-06	0.00117875	3	7	Up-regulated
Sus_scrofa___CXCL10	3.93944	7.14961	28.7492	5.46108e-06	0.00119876	3	7	Up-regulated
pCMV_____gp55	6.86665	2.89593	39.2047	6.01745e-06	0.00129549	3	7	Up-regulated
pCMV_____gp80	7.23187	3.10792	38.7901	6.62997e-06	0.00140042	3	7	Up-regulated
Sus_scrofa___MAP3K8	1.57957	6.49097	28.4422	6.85862e-06	0.00143518	3	7	Up-regulated
pCMV_____gp71	6.7757	2.84832	38.2783	6.94223e-06	0.00143923	3	7	Up-regulated
pCMV_____gp37	6.72751	2.86196	31.9127	8.07898e-06	0.00160078	3	7	Up-regulated
pCMV_____gp21	6.71167	2.81819	36.2143	9.77937e-06	0.00188759	3	7	Up-regulated
Sus_scrofa___CDA	2.12021	5.68072	26.6056	1.06898e-05	0.00202834	3	7	Up-regulated
Sus_scrofa___ECM1	1.82512	6.12786	26.0688	1.15142e-05	0.00211315	3	7	Up-regulated
pCMV_____gp75	6.72051	2.82503	34.7067	1.27502e-05	0.00226569	3	7	Up-regulated
Sus_scrofa___SNAPC1	1.69184	6.5691	26.1487	1.31314e-05	0.00229841	3	7	Up-regulated
Sus_scrofa___EMP1	1.51814	8.38485	26.0761	1.32882e-05	0.00229841	3	7	Up-regulated
Sus_scrofa___ENSSSCG00000032591	2.03756	5.93468	26.0592	1.35441e-05	0.00231491	3	7	Up-regulated
Sus_scrofa___USP43	1.98378	6.55114	25.9447	1.39535e-05	0.00236681	3	7	Up-regulated
Sus_scrofa___USP10	1.41665	7.25404	25.8072	1.43995e-05	0.00240268	3	7	Up-regulated
pCMV_____gp58	6.86602	2.90296	34.0712	1.44869e-05	0.00240268	3	7	Up-regulated
Sus_scrofa___ZMAT3	2.50747	5.90432	24.409	1.73865e-05	0.0027806	3	7	Up-regulated
pCMV_____gp05	6.99479	2.9756	32.8592	1.82426e-05	0.00287642	3	7	Up-regulated
pCMV_____gp76	6.23311	2.59641	32.2526	1.87456e-05	0.00292061	3	7	Up-regulated
pCMV_____gp69	6.67993	2.80706	32.552	1.87837e-05	0.00292061	3	7	Up-regulated
Sus_scrofa___S1PR1	1.34884	8.48742	24.8167	1.92104e-05	0.00293908	3	7	Up-regulated
Sus_scrofa___RESF1	1.35862	9.19538	24.5836	2.05765e-05	0.00311289	3	7	Up-regulated
Sus_scrofa___ATP5F1D	2.98411	3.72379	23.1012	2.14625e-05	0.00318242	3	7	Up-regulated
Sus_scrofa___H2AC20	3.45672	3.54261	22.1857	2.19226e-05	0.0031879	3	7	Up-regulated
Sus_scrofa___FKBP5	1.66153	9.85307	24.3027	2.23738e-05	0.00323193	3	7	Up-regulated
pCMV_____gp36	6.50189	2.74411	28.7373	2.35412e-05	0.00335725	3	7	Up-regulated
Papio_anubis_PABPN1	2.98198	3.20576	21.9594	2.37072e-05	0.00335952	3	7	Up-regulated
Sus_scrofa___LIX1L	2.34549	4.05765	22.779	2.40447e-05	0.00338592	3	7	Up-regulated
Sus_scrofa___SLC16A3	2.48562	4.54392	22.932	2.47527e-05	0.00346383	3	7	Up-regulated
Sus_scrofa___ZFP36L2	1.79362	7.19772	23.9117	2.5248e-05	0.0035112	3	7	Up-regulated
Sus_scrofa___PLVAP	1.62688	8.51965	23.8363	2.57695e-05	0.0035616	3	7	Up-regulated
pCMV_____gp28	6.4602	2.70241	30.615	2.64732e-05	0.00361423	3	7	Up-regulated
pCMV_____gp44	6.4602	2.70241	30.615	2.64732e-05	0.00361423	3	7	Up-regulated
Sus_scrofa___SFR1	2.47813	4.07195	22.8322	2.82711e-05	0.0037455	3	7	Up-regulated
Sus_scrofa___CCDC194	2.03782	4.8614	22.9273	3.27453e-05	0.00428753	3	7	Up-regulated
Sus_scrofa___SERTAD1	2.51117	4.30781	21.827	3.36667e-05	0.00433777	3	7	Up-regulated
Sus_scrofa___H1-0	2.64293	3.95183	21.7488	3.37102e-05	0.00433777	3	7	Up-regulated
Sus_scrofa___ENSSSCG00000014997	1.46338	7.3211	22.8522	3.483e-05	0.00443093	3	7	Up-regulated
Sus_scrofa___OASL	4.19061	4.74761	21.3662	3.92455e-05	0.00490898	3	7	Up-regulated
pCMV_____gp16	6.2288	2.60227	28.4008	3.99542e-05	0.00496986	3	7	Up-regulated
pCMV_____gp02	6.19183	2.58723	28.024	4.29562e-05	0.00531065	3	7	Up-regulated
Sus_scrofa___DUSP2	5.42306	2.52624	21.5301	4.31683e-05	0.00531065	3	7	Up-regulated
pCMV_____gp64	6.34816	2.65467	27.773	4.61818e-05	0.0055592	3	7	Up-regulated
Sus_scrofa___ENSSSCG00000011290	2.47541	3.9822	20.3942	5.00726e-05	0.00593188	3	7	Up-regulated
Sus_scrofa___ACKR2	1.87195	5.53718	21.6923	5.04227e-05	0.00594192	3	7	Up-regulated
Sus_scrofa___PPP1R15A	2.38213	4.18777	20.2443	5.41128e-05	0.00631034	3	7	Up-regulated
Sus_scrofa___MGMT	1.74164	8.30039	21.348	5.5578e-05	0.00635187	3	7	Up-regulated
pCMV_____gp63	5.96425	2.49883	26.6362	5.56505e-05	0.00635187	3	7	Up-regulated
Sus_scrofa___ENSSSCG00000014565	2.45973	7.40148	21.2572	5.73576e-05	0.00648605	3	7	Up-regulated
Sus_scrofa___ISG20	3.42927	4.7557	21.3512	5.83533e-05	0.00656134	3	7	Up-regulated
Sus_scrofa___ZNF503	2.57099	4.00637	20.0346	5.90505e-05	0.00657782	3	7	Up-regulated
pCMV_____gp19	6.03156	2.52498	26.3278	6.00774e-05	0.00665908	3	7	Up-regulated
Sus_scrofa___CEBPD	2.20786	4.93869	20.9662	6.11687e-05	0.00674664	3	7	Up-regulated
Sus_scrofa___CEMIP2	1.56046	8.67123	20.8717	6.46762e-05	0.00702961	3	7	Up-regulated
Sus_scrofa___RAP2B	2.72607	3.2316	19.0112	6.63551e-05	0.00714274	3	7	Up-regulated
Sus_scrofa___ENSSSCG00000001398	1.35887	6.88792	20.6712	6.91799e-05	0.00737332	3	7	Up-regulated
Sus_scrofa___PLOD2	1.51647	7.36252	20.6587	6.94851e-05	0.00737332	3	7	Up-regulated
Sus_scrofa___ENSSSCG00000010517	2.1953	4.33717	19.6759	7.22637e-05	0.00756068	3	7	Up-regulated
Sus_scrofa___CISH	3.18932	3.70032	19.0116	7.34011e-05	0.00764396	3	7	Up-regulated
Sus_scrofa___HIF1A	1.25163	8.3417	20.4458	7.42255e-05	0.00769402	3	7	Up-regulated
Sus_scrofa___ENSSSCG00000032436	2.54497	7.18118	20.34	7.71248e-05	0.00788504	3	7	Up-regulated
Sus_scrofa___ACKR3	2.26394	6.54499	20.182	8.16181e-05	0.00826891	3	7	Up-regulated
Sus_scrofa___LSM6	1.38721	6.65875	20.117	8.2918e-05	0.00836277	3	7	Up-regulated
Sus_scrofa___HSPA8	1.474	7.43267	20.037	8.4972e-05	0.00845579	3	7	Up-regulated
pCMV_____gp20	5.84694	2.45916	24.3006	9.16555e-05	0.008871	3	7	Up-regulated
Sus_scrofa___DCAF6	1.40768	8.10514	19.7858	9.19192e-05	0.008871	3	7	Up-regulated
Sus_scrofa___CITED2	2.08809	4.02106	19.1514	9.47256e-05	0.00903126	3	7	Up-regulated
Sus_scrofa___PSMB4	2.01007	4.60728	19.4426	9.47899e-05	0.00903126	3	7	Up-regulated
Sus_scrofa___MEF2D	1.40948	6.0495	19.6732	9.63022e-05	0.00913646	3	7	Up-regulated
Sus_scrofa___RAN	1.70912	4.68083	19.5482	9.67799e-05	0.00914305	3	7	Up-regulated
Sus_scrofa___ARHGEF26	1.4205	8.02962	19.5943	9.78776e-05	0.00918025	3	7	Up-regulated
pCMV_____gp12	5.67735	2.4024	23.504	0.000107398	0.00985513	3	7	Up-regulated
Sus_scrofa___HILPDA	2.54551	3.3738	17.7916	0.000112689	0.010133	3	7	Up-regulated
Sus_scrofa___HSPB1	2.50069	5.27552	19.0435	0.000115598	0.010353	3	7	Up-regulated
Sus_scrofa___FAM229B	5.23107	2.36775	20.299	0.000121281	0.0107757	3	7	Up-regulated
Sus_scrofa___ENSSSCG00000007552	4.19913	2.54925	18.3505	0.0001268	0.0111336	3	7	Up-regulated
Sus_scrofa___STAM	1.36721	5.74377	18.7451	0.00013112	0.0114678	3	7	Up-regulated
Sus_scrofa___SNAI2	2.27733	3.4851	17.5144	0.000133132	0.0115986	3	7	Up-regulated
Sus_scrofa___ENSSSCG00000014672	1.91202	6.44446	18.6334	0.000135384	0.011614	3	7	Up-regulated
Sus_scrofa___ST3GAL6	1.42455	7.19486	18.3208	0.000149935	0.0127645	3	7	Up-regulated
pCMV_____gp30	6.34456	2.65711	22.3697	0.00015238	0.0128747	3	7	Up-regulated
Sus_scrofa___ENSSSCG00000006395	1.64912	6.11036	18.2086	0.000156608	0.0130838	3	7	Up-regulated
Sus_scrofa___RPSA	1.36857	6.3749	18.1434	0.000159703	0.0132433	3	7	Up-regulated
Sus_scrofa___ENSSSCG00000004572	2.22644	4.46507	17.485	0.000160785	0.0132433	3	7	Up-regulated
Sus_scrofa___ENSSSCG00000012101	2.60349	3.82678	17.282	0.000161922	0.01328	3	7	Up-regulated
Sus_scrofa___KCNIP2	2.65541	3.94199	17.2739	0.000163161	0.0133327	3	7	Up-regulated
Sus_scrofa___CCL5	5.4599	3.57875	17.7132	0.000169346	0.0136391	3	7	Up-regulated
Sus_scrofa___FOSL1	2.94699	3.66227	17.2415	0.000171827	0.0137893	3	7	Up-regulated
Sus_scrofa___GSTO1	2.11186	3.88005	17.0064	0.000172825	0.0138199	3	7	Up-regulated
Sus_scrofa___ITPKC	1.62164	6.01244	17.8976	0.000174126	0.0138281	3	7	Up-regulated
Sus_scrofa___RUNX2	1.65506	6.52875	17.8904	0.000174164	0.0138281	3	7	Up-regulated
Sus_scrofa___TRNP1	2.53409	5.07927	17.7206	0.000177004	0.0139546	3	7	Up-regulated
Sus_scrofa___NEDD9	1.1596	8.68385	17.7584	0.000180938	0.0141184	3	7	Up-regulated
Sus_scrofa___ENSSSCG00000050627	1.34976	5.69401	17.7843	0.000181249	0.0141184	3	7	Up-regulated
Sus_scrofa___ENSSSCG00000014540	1.48739	6.59186	17.6102	0.000191176	0.0147601	3	7	Up-regulated
Sus_scrofa___HMGA1	3.82419	3.11148	17.0261	0.000195073	0.0150092	3	7	Up-regulated
Sus_scrofa___CD80	1.8158	4.6296	17.32	0.000202386	0.0153608	3	7	Up-regulated
Sus_scrofa___C9orf85	1.53403	5.04943	17.3765	0.000203576	0.0153989	3	7	Up-regulated
Sus_scrofa___ENSSSCG00000034802	2.16878	3.88816	16.583	0.00020866	0.015573	3	7	Up-regulated
Sus_scrofa___CNNM4	2.13396	4.39305	17.0231	0.000212459	0.0156935	3	7	Up-regulated
Sus_scrofa___CD59	2.04835	5.29938	17.2569	0.000213078	0.0156935	3	7	Up-regulated
Sus_scrofa___SERPINE1	2.14601	8.42335	17.1978	0.00022001	0.0160981	3	7	Up-regulated
Sus_scrofa___PTP4A1	1.98955	4.29443	16.7177	0.000226506	0.016398	3	7	Up-regulated
Sus_scrofa___BNIP3	1.52443	6.20049	17.1101	0.000227771	0.016398	3	7	Up-regulated
Sus_scrofa___TRIM56	1.92791	5.15598	17.0166	0.000231149	0.0165678	3	7	Up-regulated
Sus_scrofa___TINAGL1	2.42205	6.60404	17.0545	0.000232211	0.0165678	3	7	Up-regulated
Sus_scrofa___CNKSR3	1.31816	8.96046	17.0215	0.000233232	0.016578	3	7	Up-regulated
Sus_scrofa___CGAS	1.96584	6.02567	17.0176	0.000235507	0.0166341	3	7	Up-regulated
Sus_scrofa___IL4R	1.48441	6.65658	16.8869	0.00024573	0.0172473	3	7	Up-regulated
pCMV_____gp74	5.43608	2.33402	19.8925	0.000252418	0.0175517	3	7	Up-regulated
Sus_scrofa___RPL28	1.82874	6.18343	16.7759	0.000255917	0.0177399	3	7	Up-regulated
Sus_scrofa___AGPAT5	1.39799	5.8343	16.595	0.000272963	0.0186331	3	7	Up-regulated
Sus_scrofa___FSTL3	1.8916	3.36859	15.6069	0.000276718	0.0188173	3	7	Up-regulated
Sus_scrofa___CRYAB	3.19707	4.56408	15.8294	0.000281515	0.0188772	3	7	Up-regulated
Sus_scrofa___ZDHHC9	2.1932	4.50001	16.2254	0.000287355	0.0191802	3	7	Up-regulated
Sus_scrofa___H2BC21	2.73465	4.46686	15.5986	0.000292741	0.0192158	3	7	Up-regulated
Sus_scrofa___ENSSSCG00000039071	1.6371	5.23321	16.3619	0.000294281	0.0192158	3	7	Up-regulated
Sus_scrofa___NFIL3	1.75679	4.587	15.9528	0.000294373	0.0192158	3	7	Up-regulated
Sus_scrofa___OGDH	1.74673	6.57908	16.3337	0.000298311	0.0194162	3	7	Up-regulated
Sus_scrofa___AWN	4.29083	2.54205	15.9708	0.000299965	0.0194542	3	7	Up-regulated
Sus_scrofa___PSMD14	1.2028	6.94499	16.1734	0.00031506	0.0202126	3	7	Up-regulated
Sus_scrofa___ENSSSCG00000025224	1.93639	5.46351	15.9915	0.000336925	0.0214922	3	7	Up-regulated
Sus_scrofa___phTBM	2.48856	4.67572	16.1447	0.00033849	0.0215307	3	7	Up-regulated
Sus_scrofa___ENSSSCG00000013906	1.7139	6.28112	15.9161	0.000346004	0.0219463	3	7	Up-regulated
Sus_scrofa___FMO1	1.85813	8.48573	15.8881	0.000347611	0.0219859	3	7	Up-regulated
Sus_scrofa___ENSSSCG00000009240	1.99723	5.82933	15.8319	0.000356595	0.0223646	3	7	Up-regulated
Sus_scrofa___ENO1	1.62431	6.89402	15.7339	0.000363363	0.0226621	3	7	Up-regulated
Sus_scrofa___USP15	1.1266	8.343	15.7447	0.000365799	0.0227507	3	7	Up-regulated
Sus_scrofa___CASP8	1.02354	6.9928	15.5821	0.000388382	0.0238897	3	7	Up-regulated
Sus_scrofa___PTGES	2.01599	4.65336	15.443	0.000393956	0.0241662	3	7	Up-regulated
Sus_scrofa___SELENOF	1.1925	5.77509	15.4407	0.000411264	0.0249545	3	7	Up-regulated
Sus_scrofa___SMDT1	3.54609	3.17729	14.2947	0.000440617	0.0259507	3	7	Up-regulated
Sus_scrofa___IFIT1	1.84109	7.72657	15.1841	0.000447775	0.026109	3	7	Up-regulated
Sus_scrofa___RBFOX3	2.25687	3.61252	14.5319	0.000448162	0.026109	3	7	Up-regulated
Sus_scrofa___MCC	1.08376	10.6912	15.173	0.000449288	0.026109	3	7	Up-regulated
Sus_scrofa___CEP70	1.66699	4.50802	14.9525	0.000456211	0.0263391	3	7	Up-regulated
Sus_scrofa___FAM167B	1.9294	6.42134	15.1451	0.000456434	0.0263391	3	7	Up-regulated
Sus_scrofa___ERCC6	1.39572	5.30723	14.9655	0.000462643	0.0265604	3	7	Up-regulated
Sus_scrofa___PLAC9	1.84069	5.57146	15.0261	0.000477155	0.0272538	3	7	Up-regulated
Sus_scrofa___ENSSSCG00000024161	2.70349	2.78085	13.8889	0.000502727	0.0284244	3	7	Up-regulated
Sus_scrofa___ADPGK	1.24651	5.38153	14.7445	0.000528971	0.0297326	3	7	Up-regulated
Sus_scrofa___PSMD4	1.21093	5.43529	14.7366	0.000529848	0.0297326	3	7	Up-regulated
Sus_scrofa___CNP	2.2468	3.68873	14.0284	0.000541868	0.0302542	3	7	Up-regulated
Sus_scrofa___ISG12(A)	2.08647	7.86645	14.652	0.000543984	0.0302542	3	7	Up-regulated
Sus_scrofa___ALS2	1.58608	5.32994	14.6135	0.00054589	0.0302542	3	7	Up-regulated
Sus_scrofa___C11orf68	1.87855	3.24234	13.8452	0.000546695	0.0302542	3	7	Up-regulated
Sus_scrofa___JRKL	2.49532	3.54442	13.8608	0.00054725	0.0302542	3	7	Up-regulated
Sus_scrofa___C21orf91	1.28671	6.51042	14.5247	0.0005717	0.0312204	3	7	Up-regulated
Sus_scrofa___KCNC1	2.30479	4.57072	14.2464	0.000589774	0.032129	3	7	Up-regulated
Sus_scrofa___NOL11	0.993175	11.0287	14.4176	0.0005923	0.0321883	3	7	Up-regulated
Sus_scrofa___RAC1	0.980872	8.19162	14.3642	0.000604275	0.0327596	3	7	Up-regulated
Sus_scrofa___TEX10	1.41246	6.65489	14.3497	0.00060917	0.032839	3	7	Up-regulated
Sus_scrofa___ENSSSCG00000022906	2.85489	2.84304	13.3224	0.000621988	0.0331579	3	7	Up-regulated
Sus_scrofa___TBC1D32	1.93895	5.54866	14.2427	0.000629316	0.0334269	3	7	Up-regulated
Sus_scrofa___ARMH3	0.970357	7.60228	14.2528	0.00063002	0.0334269	3	7	Up-regulated
pCMV_____gp11	5.55783	2.36977	16.4997	0.000640731	0.0339148	3	7	Up-regulated
Sus_scrofa___TMEM251	3.39344	2.77153	13.3707	0.000667675	0.0346184	3	7	Up-regulated
Papio_anubis_EEF1G	2.61169	3.31541	13.5031	0.00066902	0.0346184	3	7	Up-regulated
Sus_scrofa___ENSSSCG00000037274	0.951747	7.9086	14.0747	0.000672868	0.0346334	3	7	Up-regulated
Sus_scrofa___PSMB9	1.38876	6.18009	14.0061	0.000693377	0.0355257	3	7	Up-regulated
Sus_scrofa___NDUFB11	2.50332	3.2809	13.2566	0.000696678	0.0355572	3	7	Up-regulated
Sus_scrofa___ENSSSCG00000013366	1.40671	5.73271	13.9121	0.000719893	0.036467	3	7	Up-regulated
Sus_scrofa___SLC39A1	2.44398	3.27974	12.9808	0.000755088	0.0376081	3	7	Up-regulated
Sus_scrofa___MX1	2.12249	7.89002	13.7656	0.000755857	0.0376081	3	7	Up-regulated
Sus_scrofa___SLC9A1	1.739	5.46096	13.7436	0.000761049	0.0377072	3	7	Up-regulated
Sus_scrofa___SEMA3F	1.1064	6.55713	13.7356	0.000765541	0.0378377	3	7	Up-regulated
Sus_scrofa___OAZ1	1.56251	4.85149	13.6917	0.000776597	0.0382154	3	7	Up-regulated
Sus_scrofa___ISG15	2.63682	7.97307	13.6477	0.000790828	0.0385765	3	7	Up-regulated
Sus_scrofa___XPC	1.17957	6.75286	13.5434	0.00082281	0.0395337	3	7	Up-regulated
Sus_scrofa___KCTD5	1.86003	3.79011	13.0605	0.000828515	0.0397226	3	7	Up-regulated
Sus_scrofa___MORC3	1.30071	6.80023	13.5082	0.000833499	0.0398762	3	7	Up-regulated
Sus_scrofa___SLK	1.06183	7.73986	13.4504	0.000850767	0.0402721	3	7	Up-regulated
Sus_scrofa___BTF3	1.50144	5.58107	13.4508	0.000855984	0.0403511	3	7	Up-regulated
Sus_scrofa___RPS13	2.55621	3.13014	12.5766	0.000859886	0.0404472	3	7	Up-regulated
Sus_scrofa___COMT	1.51044	4.86973	13.3693	0.000866636	0.0406792	3	7	Up-regulated
Sus_scrofa___LIN7C	2.04292	3.93594	13.0942	0.000875601	0.0409184	3	7	Up-regulated
Sus_scrofa___PSMD7	1.36744	5.14048	13.3024	0.000897045	0.0412651	3	7	Up-regulated
Sus_scrofa___ENSSSCG00000020830	1.76179	4.95186	13.2771	0.000899036	0.0412651	3	7	Up-regulated
Sus_scrofa___TMEM8B	1.08476	7.17042	13.3049	0.000899599	0.0412651	3	7	Up-regulated
Sus_scrofa___KLHL8	1.38311	6.02399	13.2894	0.00090896	0.0415339	3	7	Up-regulated
Sus_scrofa___TPT1	1.61694	6.81432	13.2694	0.000912735	0.0415411	3	7	Up-regulated
Sus_scrofa___COX6A1	2.01343	3.58091	12.6731	0.000912828	0.0415411	3	7	Up-regulated
Sus_scrofa___ADM	1.7746	5.9786	13.2128	0.000918974	0.0416515	3	7	Up-regulated
Sus_scrofa___TAF12	2.17539	3.54315	12.51	0.000958399	0.0430563	3	7	Up-regulated
Sus_scrofa___FAM13A	0.969726	7.88909	13.1273	0.000961821	0.0430563	3	7	Up-regulated
Sus_scrofa___SLC12A2	1.30167	8.46205	13.0912	0.000974795	0.0434774	3	7	Up-regulated
Sus_scrofa___CDV3	1.10718	6.77858	13.0811	0.000981026	0.0436438	3	7	Up-regulated
Sus_scrofa___RBM15B	2.995	2.80476	12.462	0.000985984	0.0436438	3	7	Up-regulated
Sus_scrofa___ENTPD4	1.27215	5.47421	12.999	0.00101197	0.0446903	3	7	Up-regulated
Sus_scrofa___TMED9	1.49629	4.84197	12.9345	0.00101964	0.0449404	3	7	Up-regulated
Sus_scrofa___RPS20	1.30533	6.55143	12.9682	0.00102448	0.0449922	3	7	Up-regulated
Sus_scrofa___RHOJ	0.867811	8.55888	12.9601	0.00102483	0.0449922	3	7	Up-regulated
Sus_scrofa___ENSSSCG00000017509	1.56784	5.92034	12.958	0.00102967	0.045116	3	7	Up-regulated
Sus_scrofa___ENSSSCG00000038192	2.79553	3.55134	12.3919	0.00103661	0.0453313	3	7	Up-regulated
Sus_scrofa___ARRDC2	1.5514	5.91655	12.9346	0.00104081	0.0453702	3	7	Up-regulated
Sus_scrofa___ENSSSCG00000035904	1.51425	6.9612	12.9212	0.00104201	0.0453702	3	7	Up-regulated
Sus_scrofa___IGF2BP2	1.43622	8.58233	12.9132	0.00104357	0.0453702	3	7	Up-regulated
Sus_scrofa___TAX1BP3	1.65466	4.03382	12.5053	0.00107257	0.0464536	3	7	Up-regulated
Sus_scrofa___H3-5	1.35056	8.07138	12.8365	0.00107472	0.0464536	3	7	Up-regulated
Sus_scrofa___HES4	2.33893	4.31428	12.5849	0.00107688	0.0464572	3	7	Up-regulated
Sus_scrofa___IRF7	2.27743	4.84097	12.6592	0.00108697	0.0467124	3	7	Up-regulated
Sus_scrofa___ENSSSCG00000010893	1.77552	7.17119	12.6774	0.00114401	0.0485302	3	7	Up-regulated
Sus_scrofa___UBD	3.78517	2.61751	12.2025	0.00117263	0.0495265	3	7	Up-regulated
Sus_scrofa___CREB5	-2.25519	8.41064	47.7593	6.61038e-08	6.16693e-05	3	7	Down-regulated
Sus_scrofa___PLXDC2	-1.80562	10.1359	44.4876	1.32322e-07	9.55704e-05	3	7	Down-regulated
Sus_scrofa___TSPAN18	-2.59589	8.64393	41.7142	2.45869e-07	0.000134972	3	7	Down-regulated
Sus_scrofa___CDH13	-1.86066	10.6366	41.6109	2.50817e-07	0.000134972	3	7	Down-regulated
Sus_scrofa___CDC14A	-2.80883	7.45049	41.3427	2.60067e-07	0.000134972	3	7	Down-regulated
Sus_scrofa___AUTS2	-2.23438	11.0174	41.3646	2.65242e-07	0.000134972	3	7	Down-regulated
Sus_scrofa___FHL2	-7.072	7.12167	40.4936	3.23415e-07	0.000147781	3	7	Down-regulated
Sus_scrofa___ZNF704	-3.29351	7.11871	37.7511	5.80501e-07	0.000236316	3	7	Down-regulated
Sus_scrofa___LIMCH1	-2.81314	8.05432	36.6243	8.11022e-07	0.000297685	3	7	Down-regulated
Sus_scrofa___RASGRF2	-1.68097	9.45782	35.1692	1.159e-06	0.000376086	3	7	Down-regulated
Sus_scrofa___VWF	-1.94045	9.50046	34.9639	1.22007e-06	0.000390249	3	7	Down-regulated
Sus_scrofa___SEMA6A	-3.04537	9.37242	34.0355	1.54434e-06	0.000459644	3	7	Down-regulated
Sus_scrofa___ASS1	-3.1262	6.09296	33.3892	1.5656e-06	0.000459644	3	7	Down-regulated
Sus_scrofa___ENSSSCG00000006156	-1.80785	7.92131	33.9318	1.58688e-06	0.000459644	3	7	Down-regulated
Sus_scrofa___CCM2L	-2.57352	6.30693	33.5482	1.60126e-06	0.000459644	3	7	Down-regulated
Sus_scrofa___ADAMTSL3	-2.74555	6.84747	31.2837	2.98665e-06	0.00075136	3	7	Down-regulated
Sus_scrofa___ITGA9	-1.86884	8.73566	31.2083	3.20866e-06	0.000796544	3	7	Down-regulated
Sus_scrofa___IL33	-3.71545	7.34046	30.4954	3.72876e-06	0.00088816	3	7	Down-regulated
Sus_scrofa___ZBTB7C	-2.6533	7.26914	30.2985	4.04787e-06	0.000944082	3	7	Down-regulated
Sus_scrofa___JAM2	-2.04385	7.79978	30.1025	4.31502e-06	0.000996014	3	7	Down-regulated
Sus_scrofa___ZNF423	-1.62519	8.68569	29.5753	4.97529e-06	0.00113446	3	7	Down-regulated
Sus_scrofa___TM4SF18	-3.47045	5.31524	29.0521	5.03577e-06	0.00113446	3	7	Down-regulated
Sus_scrofa___IGFBP7	-1.73368	9.58933	29.0539	5.7326e-06	0.00124615	3	7	Down-regulated
Sus_scrofa___SASH1	-1.27292	9.37564	28.703	6.31503e-06	0.00134661	3	7	Down-regulated
Sus_scrofa___PARD3B	-1.58274	8.88461	28.1442	7.37746e-06	0.00151543	3	7	Down-regulated
Sus_scrofa___THSD7A	-3.54633	7.303	27.9821	7.46465e-06	0.0015194	3	7	Down-regulated
Sus_scrofa___ADAM19	-4.39702	5.90826	27.5757	7.80792e-06	0.00157361	3	7	Down-regulated
Sus_scrofa___CACNA2D1	-2.11653	8.02367	27.9202	7.87156e-06	0.00157361	3	7	Down-regulated
Sus_scrofa___SPNS2	-1.81916	6.23486	27.208	9.39547e-06	0.0018453	3	7	Down-regulated
Sus_scrofa___LRFN5	-2.76291	7.73157	27.2045	9.60186e-06	0.00186944	3	7	Down-regulated
Sus_scrofa___SLC8A1	-2.96511	9.92101	26.862	1.06004e-05	0.00202834	3	7	Down-regulated
Sus_scrofa___ENSSSCG00000043817	-1.86079	7.70634	26.7398	1.09917e-05	0.00206172	3	7	Down-regulated
Sus_scrofa___LDB2	-2.1137	11.2615	26.7091	1.10628e-05	0.00206172	3	7	Down-regulated
Sus_scrofa___KLF12	-1.19675	9.64718	26.6847	1.1142e-05	0.00206172	3	7	Down-regulated
Sus_scrofa___ADGRG6	-3.45471	7.6353	26.3235	1.20892e-05	0.00220062	3	7	Down-regulated
Sus_scrofa___PAMR1	-2.49308	6.86603	26.2809	1.24263e-05	0.00224375	3	7	Down-regulated
Sus_scrofa___PCDH7	-3.27427	8.29235	26.2568	1.25885e-05	0.00225485	3	7	Down-regulated
Sus_scrofa___MEOX1	-4.21983	5.80867	25.6867	1.32299e-05	0.00229841	3	7	Down-regulated
Sus_scrofa___CMAH	-2.19896	8.3337	26.0664	1.33449e-05	0.00229841	3	7	Down-regulated
Sus_scrofa___FHOD3	-4.09501	7.75511	25.5824	1.4301e-05	0.00240268	3	7	Down-regulated
Sus_scrofa___FLRT2	-2.1273	8.21795	25.741	1.46702e-05	0.00241519	3	7	Down-regulated
Sus_scrofa___PARVA	-1.65639	8.53411	25.4319	1.60331e-05	0.00261961	3	7	Down-regulated
Sus_scrofa___VCAM1	-3.48854	5.64447	24.9853	1.61459e-05	0.00261961	3	7	Down-regulated
Sus_scrofa___ENSSSCG00000012362	-1.36059	10.2149	25.1921	1.71838e-05	0.00276795	3	7	Down-regulated
Sus_scrofa___NAALADL2	-3.04325	6.85878	24.8517	1.80962e-05	0.00287358	3	7	Down-regulated
Sus_scrofa___SEL1L3	-1.58571	8.60253	24.8695	1.89282e-05	0.00292277	3	7	Down-regulated
Sus_scrofa___ENSSSCG00000012238	-3.44267	4.74351	24.4939	1.92963e-05	0.00293908	3	7	Down-regulated
Sus_scrofa___ENSSSCG00000023479	-3.31279	5.83817	24.1917	2.07351e-05	0.00311584	3	7	Down-regulated
Sus_scrofa___MID1	-1.96551	6.96738	24.5083	2.09276e-05	0.00312379	3	7	Down-regulated
Sus_scrofa___DNAH11	-3.33731	5.42853	24.0256	2.18262e-05	0.0031879	3	7	Down-regulated
Sus_scrofa___SEMA6D	-2.24696	7.33695	24.3582	2.19266e-05	0.0031879	3	7	Down-regulated
Sus_scrofa___SOX13	-2.00861	7.70204	24.1999	2.31036e-05	0.00331595	3	7	Down-regulated
Sus_scrofa___TMEM245	-1.68344	7.0575	23.6206	2.75445e-05	0.00371355	3	7	Down-regulated
Sus_scrofa___NOS1AP	-1.88877	7.67907	23.6173	2.75778e-05	0.00371355	3	7	Down-regulated
Sus_scrofa___ARHGEF3	-1.43696	9.22521	23.5888	2.77521e-05	0.00371355	3	7	Down-regulated
Sus_scrofa___RUBCNL	-1.6743	7.40675	23.5807	2.7864e-05	0.00371355	3	7	Down-regulated
Sus_scrofa___DAB2	-1.50465	7.26991	23.1333	3.19539e-05	0.00420851	3	7	Down-regulated
Sus_scrofa___KDSR	-1.42505	7.40913	22.9603	3.36919e-05	0.00433777	3	7	Down-regulated
Sus_scrofa___ST3GAL3	-1.61677	7.51403	22.8539	3.48066e-05	0.00443093	3	7	Down-regulated
Sus_scrofa___RALGAPA2	-1.42383	8.00191	22.7159	3.62813e-05	0.00458948	3	7	Down-regulated
Sus_scrofa___ZNF521	-1.81407	8.63195	22.5224	3.8504e-05	0.00484329	3	7	Down-regulated
Sus_scrofa___RHOBTB1	-3.84865	5.06351	21.8392	4.40423e-05	0.00538857	3	7	Down-regulated
Sus_scrofa___MBOAT1	-2.05927	5.40816	21.8223	4.47126e-05	0.00541422	3	7	Down-regulated
Sus_scrofa___LDLRAD3	-2.53624	8.18237	22.0379	4.47356e-05	0.00541422	3	7	Down-regulated
Sus_scrofa___MFSD4A	-3.03514	5.82069	21.5976	4.67089e-05	0.00559258	3	7	Down-regulated
Sus_scrofa___EXT1	-1.19038	10.8203	21.7055	4.96259e-05	0.00591023	3	7	Down-regulated
Sus_scrofa___RNF144A	-2.14914	5.89131	21.3012	5.35181e-05	0.00627366	3	7	Down-regulated
Sus_scrofa___ISM1	-3.17908	4.80401	20.9763	5.48203e-05	0.00633926	3	7	Down-regulated
Sus_scrofa___LTBP4	-1.91645	6.88516	21.3722	5.4927e-05	0.00633926	3	7	Down-regulated
Sus_scrofa___HSPG2	-1.81678	9.75004	21.3297	5.58873e-05	0.00635187	3	7	Down-regulated
Sus_scrofa___INPP4B	-1.6991	8.7473	21.1817	5.86096e-05	0.00656134	3	7	Down-regulated
Sus_scrofa___TET1	-1.83877	6.87327	21.0067	6.17279e-05	0.00677493	3	7	Down-regulated
Sus_scrofa___RUNX1T1	-1.70493	9.04069	20.9491	6.30883e-05	0.00689047	3	7	Down-regulated
Sus_scrofa___DACH1	-1.83032	9.65637	20.843	6.52669e-05	0.00705954	3	7	Down-regulated
Sus_scrofa___SMTN	-2.00792	7.19539	20.7499	6.71704e-05	0.00719591	3	7	Down-regulated
Sus_scrofa___ARHGAP20	-3.77301	5.62194	20.3958	7.07655e-05	0.00747377	3	7	Down-regulated
Sus_scrofa___MYRIP	-2.18475	7.3737	20.5328	7.16553e-05	0.00753222	3	7	Down-regulated
Sus_scrofa___CDH2	-4.56532	7.17555	20.1512	7.47028e-05	0.00770782	3	7	Down-regulated
Sus_scrofa___ENSSSCG00000028341	-4.55965	4.65335	20.002	7.59901e-05	0.00780467	3	7	Down-regulated
Sus_scrofa___LIMA1	-1.36439	8.12998	20.2754	7.84177e-05	0.00798078	3	7	Down-regulated
Sus_scrofa___PDE3A	-2.11873	9.26816	20.0674	8.38426e-05	0.00841809	3	7	Down-regulated
Sus_scrofa___ZNF462	-1.56586	7.35776	20.0301	8.49734e-05	0.00845579	3	7	Down-regulated
Sus_scrofa___FAM171A1	-1.11334	9.40633	20.0096	8.53999e-05	0.00846064	3	7	Down-regulated
Sus_scrofa___MAPK11	-2.00036	5.47807	19.8783	8.64469e-05	0.00852663	3	7	Down-regulated
Sus_scrofa___LFNG	-2.12973	5.59257	19.764	8.75867e-05	0.00860116	3	7	Down-regulated
Sus_scrofa___MMP16	-2.27721	7.40766	19.8923	8.8678e-05	0.00867031	3	7	Down-regulated
Sus_scrofa___WIPF3	-6.6066	4.08545	20.2748	8.92167e-05	0.00868505	3	7	Down-regulated
Sus_scrofa___PXDN	-1.62756	7.3394	19.7517	9.25869e-05	0.00889708	3	7	Down-regulated
Sus_scrofa___DLC1	-1.64323	9.73037	19.5889	9.79938e-05	0.00918025	3	7	Down-regulated
Sus_scrofa___FAP	-2.15509	5.75804	19.3038	0.000101303	0.00945069	3	7	Down-regulated
Sus_scrofa___ENKD1	-5.45586	3.70358	19.1737	0.000101775	0.00945536	3	7	Down-regulated
Sus_scrofa___VGLL3	-5.96016	3.7386	19.1218	0.000105155	0.00971027	3	7	Down-regulated
Sus_scrofa___MITF	-2.33138	6.6004	19.3476	0.000105386	0.00971027	3	7	Down-regulated
Sus_scrofa___LNX1	-2.80545	7.61116	19.2509	0.000108118	0.00988068	3	7	Down-regulated
Sus_scrofa___TSPAN11	-5.64016	4.11216	19.1213	0.000109928	0.00997825	3	7	Down-regulated
Sus_scrofa___ENSSSCG00000038144	-1.35342	8.72173	19.237	0.000110077	0.00997825	3	7	Down-regulated
Sus_scrofa___LAMC2	-3.61244	4.12497	18.8095	0.000110681	0.00999258	3	7	Down-regulated
Sus_scrofa___GASK1B	-1.85243	9.00274	18.953	0.00012096	0.0107757	3	7	Down-regulated
Sus_scrofa___ADAMTS7	-3.87777	5.19753	18.7205	0.00012422	0.0109932	3	7	Down-regulated
Sus_scrofa___TLN2	-2.16242	7.34413	18.8179	0.000126445	0.0111336	3	7	Down-regulated
Sus_scrofa___PCDH19	-2.20334	5.49012	18.507	0.000134172	0.011614	3	7	Down-regulated
Sus_scrofa___ENSSSCG00000006286	-4.66936	4.35886	18.7254	0.000134824	0.011614	3	7	Down-regulated
Sus_scrofa___MACROD2	-1.75064	8.77959	18.627	0.000134917	0.011614	3	7	Down-regulated
Sus_scrofa___SESN3	-3.81075	5.25587	18.3901	0.000139551	0.0119257	3	7	Down-regulated
Sus_scrofa___TENM2	-7.71385	5.39043	18.3409	0.000151612	0.0128583	3	7	Down-regulated
Sus_scrofa___FRYL	-1.02934	10.4867	18.2491	0.000153117	0.0128883	3	7	Down-regulated
Sus_scrofa___PPM1E	-3.7592	6.34281	18.0013	0.000154809	0.0129819	3	7	Down-regulated
Sus_scrofa___DEPDC1B	-1.51216	7.23092	18.1359	0.000159413	0.0132433	3	7	Down-regulated
Sus_scrofa___TDRD10	-1.56851	6.26347	18.0986	0.000160884	0.0132433	3	7	Down-regulated
Sus_scrofa___C1orf74	-2.15735	4.80487	17.8583	0.000163977	0.0133507	3	7	Down-regulated
Sus_scrofa___GLCCI1	-2.59854	4.63215	17.8245	0.00016685	0.0135354	3	7	Down-regulated
Sus_scrofa___DENND2A	-2.26108	6.03943	17.8464	0.000169314	0.0136391	3	7	Down-regulated
Sus_scrofa___SLC16A7	-4.54106	5.1969	17.7006	0.000176781	0.0139546	3	7	Down-regulated
Sus_scrofa___PPP1R16B	-1.52947	8.64849	17.8078	0.000178047	0.0139877	3	7	Down-regulated
Sus_scrofa___CALD1	-1.53419	9.26041	17.7476	0.000181603	0.0141184	3	7	Down-regulated
Sus_scrofa___ENSSSCG00000049524	-2.77291	5.63814	17.5339	0.000182945	0.0141735	3	7	Down-regulated
Sus_scrofa___RCAN2	-3.36476	7.91489	17.4745	0.000197583	0.0151503	3	7	Down-regulated
Sus_scrofa___RYR2	-3.06282	9.86007	17.4742	0.000199643	0.015256	3	7	Down-regulated
Sus_scrofa___LZTS1	-2.92868	5.15764	17.2448	0.000202228	0.0153608	3	7	Down-regulated
Sus_scrofa___ADCY4	-1.2028	7.182	17.4051	0.000204642	0.0154274	3	7	Down-regulated
Sus_scrofa___ENTPD1	-1.7649	7.9081	17.3915	0.00020551	0.0154408	3	7	Down-regulated
Sus_scrofa___ARMC9	-1.46648	6.75012	17.3637	0.000207615	0.0155468	3	7	Down-regulated
Sus_scrofa___CMTM8	-1.09066	9.30196	17.3071	0.000211256	0.0156935	3	7	Down-regulated
Sus_scrofa___MAP3K5	-2.01637	7.84388	17.2937	0.000212506	0.0156935	3	7	Down-regulated
Sus_scrofa___HID1	-2.11021	5.16618	17.0853	0.000215586	0.0158262	3	7	Down-regulated
Sus_scrofa___NTN5	-2.0706	4.93653	16.8962	0.000226321	0.016398	3	7	Down-regulated
Sus_scrofa___UCK2	-2.38043	7.35661	17.0193	0.000227167	0.016398	3	7	Down-regulated
Sus_scrofa___PKP4	-1.13759	8.92765	17.0952	0.000227342	0.016398	3	7	Down-regulated
Sus_scrofa___SCARB1	-3.03914	6.78928	16.9046	0.000232349	0.0165678	3	7	Down-regulated
Sus_scrofa___NPR1	-1.45299	7.70425	17.01	0.000234527	0.0166173	3	7	Down-regulated
Sus_scrofa___FBXL7	-1.28714	10.3807	16.9232	0.000241287	0.0169887	3	7	Down-regulated
Sus_scrofa___ENSSSCG00000040109	-4.93219	5.50155	16.6458	0.000247512	0.0173181	3	7	Down-regulated
Sus_scrofa___BACH2	-2.07427	7.16645	16.7905	0.000252336	0.0175517	3	7	Down-regulated
Sus_scrofa___AK5	-2.91884	5.51544	16.4496	0.000260047	0.0179706	3	7	Down-regulated
Sus_scrofa___SH3PXD2B	-2.29213	7.02408	16.6628	0.000260998	0.0179808	3	7	Down-regulated
Sus_scrofa___SULF2	-2.73718	4.99437	16.4944	0.000263172	0.0180749	3	7	Down-regulated
Sus_scrofa___FILIP1	-1.96679	9.17423	16.5949	0.000270706	0.0185355	3	7	Down-regulated
Sus_scrofa___FLT4	-3.85183	4.61165	16.0819	0.000277342	0.0188173	3	7	Down-regulated
Sus_scrofa___CHN1	-3.19154	6.85718	16.4366	0.000280055	0.0188772	3	7	Down-regulated
Sus_scrofa___ENSSSCG00000015747	-5.2535	6.74314	16.1259	0.000280252	0.0188772	3	7	Down-regulated
Sus_scrofa___ENSSSCG00000049691	-2.0986	8.85681	16.4844	0.000281598	0.0188772	3	7	Down-regulated
Sus_scrofa___MCAM	-2.17224	5.37029	16.2652	0.000288568	0.0191802	3	7	Down-regulated
Sus_scrofa___CDK14	-1.81022	8.00316	16.4088	0.000289305	0.0191802	3	7	Down-regulated
Sus_scrofa___LRRTM3	-7.25843	4.96858	16.218	0.000289544	0.0191802	3	7	Down-regulated
Sus_scrofa___PTGER3	-4.96239	5.5331	16.2779	0.000292663	0.0192158	3	7	Down-regulated
Sus_scrofa___RERG	-3.05355	4.12957	16.1034	0.000293095	0.0192158	3	7	Down-regulated
Sus_scrofa___ROBO4	-1.4854	8.81746	16.2972	0.000300632	0.0194542	3	7	Down-regulated
Sus_scrofa___DST	-1.05363	10.5338	16.2569	0.000304809	0.0196677	3	7	Down-regulated
Sus_scrofa___DISC1	-1.09091	9.59987	16.2218	0.000308646	0.019858	3	7	Down-regulated
Sus_scrofa___SVEP1	-3.37308	5.63916	15.9579	0.000316397	0.0202403	3	7	Down-regulated
Sus_scrofa___MMP28	-3.7136	5.74335	15.6455	0.000350811	0.0221258	3	7	Down-regulated
Sus_scrofa___TTC3	-1.35904	7.49581	15.8456	0.000353283	0.0222191	3	7	Down-regulated
Sus_scrofa___ATG7	-1.11893	8.19182	15.7753	0.0003619	0.0226339	3	7	Down-regulated
Sus_scrofa___THRB	-2.14527	7.20908	15.7114	0.000369388	0.0229102	3	7	Down-regulated
Sus_scrofa___DNMT3A	-1.32503	6.523	15.7014	0.000371562	0.0229814	3	7	Down-regulated
Sus_scrofa___STOX2	-1.08135	9.78931	15.6081	0.000384052	0.0236885	3	7	Down-regulated
Sus_scrofa___CORO2B	-1.61754	7.10823	15.522	0.000396787	0.0242734	3	7	Down-regulated
Sus_scrofa___ARFGEF3	-5.88007	3.82035	15.6623	0.000397991	0.0242807	3	7	Down-regulated
Sus_scrofa___MYOF	-2.53587	6.76979	15.4108	0.000403847	0.024571	3	7	Down-regulated
Sus_scrofa___GAB1	-1.34796	7.1719	15.4158	0.000412389	0.0249551	3	7	Down-regulated
Sus_scrofa___LIMS2	-2.22962	6.38273	15.3454	0.000413717	0.024968	3	7	Down-regulated
Sus_scrofa___NEURL1B	-2.66444	6.04172	15.2505	0.000416392	0.0249964	3	7	Down-regulated
Sus_scrofa___PGM5	-2.39681	7.63178	15.3841	0.000416512	0.0249964	3	7	Down-regulated
Sus_scrofa___ITGB4	-3.12909	4.38401	15.2269	0.000417537	0.0249964	3	7	Down-regulated
Sus_scrofa___ENSSSCG00000017177	-1.64829	6.63627	15.3284	0.000424279	0.0253323	3	7	Down-regulated
Sus_scrofa___PDE4D	-1.60458	10.5631	15.2894	0.000430757	0.0256414	3	7	Down-regulated
Sus_scrofa___SOX6	-3.3063	6.10199	15.1247	0.000431746	0.0256414	3	7	Down-regulated
Sus_scrofa___GPR63	-2.4479	4.91551	15.0341	0.000433625	0.0256848	3	7	Down-regulated
Sus_scrofa___ADCY5	-4.44666	4.57426	14.918	0.000438044	0.0258781	3	7	Down-regulated
Sus_scrofa___GJA5	-3.54222	5.16323	15.1169	0.00044159	0.0259507	3	7	Down-regulated
Sus_scrofa___ENSSSCG00000014575	-2.21164	6.18589	15.1799	0.000442772	0.025952	3	7	Down-regulated
Sus_scrofa___MYOCD	-4.22059	6.08162	15.0494	0.000450115	0.026109	3	7	Down-regulated
Sus_scrofa___ATP2B4	-2.22579	6.74073	15.0503	0.000459794	0.0264648	3	7	Down-regulated
Sus_scrofa___SH3RF2	-1.46516	7.06579	15.0529	0.000469827	0.0269039	3	7	Down-regulated
Sus_scrofa___IL34	-2.90575	4.70928	14.8189	0.000490922	0.0279688	3	7	Down-regulated
Sus_scrofa___SYNE2	-1.17439	9.51037	14.9034	0.000495627	0.0281652	3	7	Down-regulated
Sus_scrofa___RNF165	-2.09578	5.98923	14.744	0.00049875	0.0282709	3	7	Down-regulated
Sus_scrofa___CAMK1D	-1.65005	7.24677	14.7559	0.000523192	0.029507	3	7	Down-regulated
Sus_scrofa___TTN	-2.27698	11.3814	14.633	0.000547155	0.0302542	3	7	Down-regulated
Sus_scrofa___NGF	-4.13037	3.97867	14.1735	0.000550409	0.0303538	3	7	Down-regulated
Sus_scrofa___HPCAL1	-1.21104	8.45095	14.5948	0.000555065	0.0305354	3	7	Down-regulated
Sus_scrofa___PREX1	-2.2385	5.60866	14.4191	0.000565914	0.0310361	3	7	Down-regulated
Papio_anubis_ARHGAP15	-5.39742	2.82691	14.8308	0.000566939	0.0310361	3	7	Down-regulated
Sus_scrofa___RAPGEF5	-1.11338	9.2508	14.3401	0.000609584	0.032839	3	7	Down-regulated
Sus_scrofa___SEMA5B	-4.00064	3.54742	14.2121	0.000611707	0.032839	3	7	Down-regulated
Sus_scrofa___FKBP9	-1.42049	6.03378	14.3169	0.000612917	0.032839	3	7	Down-regulated
Sus_scrofa___TECRL	-4.26295	5.28385	14.156	0.000613073	0.032839	3	7	Down-regulated
Sus_scrofa___TOP2A	-4.40599	4.90009	14.1535	0.00061772	0.0330089	3	7	Down-regulated
Sus_scrofa___ENSSSCG00000017032	-4.98335	3.09814	13.7047	0.000643633	0.0339881	3	7	Down-regulated
Sus_scrofa___ITGB3	-2.16262	5.09053	14.0439	0.000647544	0.0340381	3	7	Down-regulated
Sus_scrofa___ENSSSCG00000003909	-1.32533	9.35906	14.1768	0.000647621	0.0340381	3	7	Down-regulated
Sus_scrofa___MAGI2	-2.02542	6.16503	14.0937	0.000662874	0.0346184	3	7	Down-regulated
Sus_scrofa___ST6GALNAC3	-1.18217	10.2187	14.1103	0.000663771	0.0346184	3	7	Down-regulated
Sus_scrofa___LAMC1	-0.999533	8.68397	14.0976	0.000667021	0.0346184	3	7	Down-regulated
Sus_scrofa___USP54	-1.47346	5.94585	14.0787	0.000668742	0.0346184	3	7	Down-regulated
Sus_scrofa___TTC7B	-1.08989	8.76533	14.0847	0.000670291	0.0346184	3	7	Down-regulated
Sus_scrofa___ZDHHC14	-1.60576	6.60103	14.0665	0.000671032	0.0346184	3	7	Down-regulated
Sus_scrofa___C1orf185	-3.5924	4.5815	13.9126	0.00069087	0.0354784	3	7	Down-regulated
Sus_scrofa___ENSSSCG00000010626	-3.63411	7.17729	13.9306	0.000697169	0.0355572	3	7	Down-regulated
Sus_scrofa___GRB10	-1.3431	9.08128	13.9584	0.000702557	0.0357505	3	7	Down-regulated
Sus_scrofa___SLC40A1	-2.87014	4.88764	13.7815	0.000719513	0.036467	3	7	Down-regulated
Sus_scrofa___LMNTD1	-2.92839	5.46925	13.7784	0.000722813	0.0365323	3	7	Down-regulated
Sus_scrofa___ENSSSCG00000028691	-1.7473	5.48341	13.804	0.000728848	0.0367543	3	7	Down-regulated
Sus_scrofa___PCDH18	-5.41072	3.09943	13.4882	0.000730989	0.0367794	3	7	Down-regulated
Sus_scrofa___WIF1	-2.24056	5.20838	13.6907	0.000743408	0.0373204	3	7	Down-regulated
Sus_scrofa___ENSSSCG00000048720	-5.27732	3.11534	13.3617	0.000746177	0.0373756	3	7	Down-regulated
Sus_scrofa___NXN	-1.20966	9.42337	13.7651	0.00075522	0.0376081	3	7	Down-regulated
Sus_scrofa___PTPRB	-0.981475	10.6378	13.7438	0.000761217	0.0377072	3	7	Down-regulated
Sus_scrofa___FAM189A2	-4.31646	3.95725	13.4624	0.000773818	0.0381625	3	7	Down-regulated
Sus_scrofa___MEIS2	-2.49113	7.44705	13.6779	0.000779636	0.0382808	3	7	Down-regulated
Sus_scrofa___HMCN1	-1.94753	10.7046	13.6554	0.000786962	0.038556	3	7	Down-regulated
Sus_scrofa___PKP2	-5.98129	4.19767	13.5987	0.00078901	0.0385719	3	7	Down-regulated
Sus_scrofa___ENSSSCG00000036052	-5.17013	6.03125	13.449	0.000796839	0.0387853	3	7	Down-regulated
Sus_scrofa___CHP2	-3.76085	4.14927	13.3609	0.000798999	0.0388061	3	7	Down-regulated
Sus_scrofa___NAALAD2	-5.60791	3.20855	13.1839	0.000805521	0.0389086	3	7	Down-regulated
Sus_scrofa___MYOZ2	-3.5853	6.68913	13.5332	0.000806058	0.0389086	3	7	Down-regulated
Sus_scrofa___PHLDB2	-1.26706	8.11142	13.5923	0.000806324	0.0389086	3	7	Down-regulated
Sus_scrofa___KCNJ3	-6.84605	4.91194	13.3619	0.000822287	0.0395337	3	7	Down-regulated
Sus_scrofa___ENSSSCG00000011729	-1.40806	8.69689	13.4758	0.000842305	0.0401833	3	7	Down-regulated
Sus_scrofa___ZCWPW2	-2.99721	4.59235	13.3658	0.000843508	0.0401833	3	7	Down-regulated
Sus_scrofa___MYOM1	-4.36653	5.37901	13.3074	0.0008458	0.0402069	3	7	Down-regulated
Sus_scrofa___TLL2	-2.98739	4.09394	13.3944	0.000847661	0.04021	3	7	Down-regulated
Sus_scrofa___PLXND1	-1.24942	7.41515	13.4355	0.000856042	0.0403511	3	7	Down-regulated
Sus_scrofa___PLCL1	-1.77239	7.9835	13.3734	0.000876286	0.0409184	3	7	Down-regulated
Sus_scrofa___ENSSSCG00000016119	-1.2986	7.41605	13.3713	0.000877215	0.0409184	3	7	Down-regulated
Sus_scrofa___LURAP1L	-2.81931	5.7047	13.2316	0.000883703	0.0411354	3	7	Down-regulated
Sus_scrofa___DOCK6	-1.17532	7.28435	13.3309	0.000890905	0.0412651	3	7	Down-regulated
Sus_scrofa___NCOA7	-0.946686	9.72996	13.3246	0.000891725	0.0412651	3	7	Down-regulated
Sus_scrofa___CALML4	-3.07995	3.58005	13.0475	0.000895939	0.0412651	3	7	Down-regulated
Sus_scrofa___ENSSSCG00000000194	-1.74288	6.56591	13.2962	0.00090104	0.0412651	3	7	Down-regulated
Sus_scrofa___JAM3	-1.29743	8.66584	13.2975	0.000901235	0.0412651	3	7	Down-regulated
Sus_scrofa___MTMR12	-1.22765	6.63296	13.2505	0.000918635	0.0416515	3	7	Down-regulated
Sus_scrofa___SEMA3D	-3.13198	4.55045	12.9888	0.000954057	0.0430563	3	7	Down-regulated
Sus_scrofa___ARHGAP28	-1.98832	7.52133	13.1397	0.000955274	0.0430563	3	7	Down-regulated
Sus_scrofa___PLEKHA5	-1.65634	6.89438	13.142	0.00095726	0.0430563	3	7	Down-regulated
Sus_scrofa___PDE6D	-1.58257	5.37518	13.1048	0.000960494	0.0430563	3	7	Down-regulated
Sus_scrofa___ENSSSCG00000031075	-2.11073	5.66743	13.063	0.000963429	0.0430563	3	7	Down-regulated
Papio_anubis_RUNX1	-5.57096	2.80891	13.1451	0.000984524	0.0436438	3	7	Down-regulated
Sus_scrofa___TRDN	-7.0216	5.32693	13.2104	0.000986323	0.0436438	3	7	Down-regulated
Sus_scrofa___LRP1B	-3.31928	6.64872	12.6593	0.0010735	0.0464536	3	7	Down-regulated
Sus_scrofa___PTPRS	-1.8645	5.00905	12.7308	0.00108109	0.0465491	3	7	Down-regulated
Sus_scrofa___ELOVL6	-2.16239	5.64858	12.6777	0.00111146	0.0476079	3	7	Down-regulated
Sus_scrofa___C20orf194	-1.05573	8.29163	12.7451	0.00111328	0.0476079	3	7	Down-regulated
Sus_scrofa___ENSSSCG00000008241	-1.65291	5.65522	12.7069	0.00111418	0.0476079	3	7	Down-regulated
Sus_scrofa___ITGB5	-1.66121	6.022	12.7019	0.00112142	0.0478258	3	7	Down-regulated
Sus_scrofa___ENSSSCG00000010212	-2.31615	7.50988	12.717	0.00112594	0.0479276	3	7	Down-regulated
Sus_scrofa___ATP1B1	-3.0695	5.62637	12.544	0.00114444	0.0485302	3	7	Down-regulated
Sus_scrofa___TSPAN5	-2.24573	7.29946	12.645	0.00115687	0.0489645	3	7	Down-regulated
Sus_scrofa___MSRB3	-1.96045	7.97665	12.6081	0.00117457	0.0495265	3	7	Down-regulated
