# Supplementary material for: Integrated Molecular Profiling of Preclinical and Clinical Cardiac Xenotransplants
Source: Research Square preprint supplement (doi:10.21203/rs.3.rs-8406985/v1), 2026-02-04
Supplement: Supplementary file 44 [file ecf89e0d23eaec89441e92a5.xlsx]

## Sheet: NK_CD16hi_papio
Gene	logFC	logCPM	F	PValue	FDR	Observations_Rejection	Observations_3month_protocol	level
Papio_anubis_ABTB2	3.76816	7.79922	36.4953	1.59744e-09	2.0706e-05	4	6	Up-regulated
Papio_anubis_ZDHHC14	2.79347	8.45467	34.474	4.48913e-09	2.90941e-05	4	6	Up-regulated
Papio_anubis_PDE7B	2.26834	9.13772	33.2702	8.31349e-09	3.59198e-05	4	6	Up-regulated
Sus_scrofa___COX2	2.9057	8.27427	28.0348	1.22258e-07	0.000396178	4	6	Up-regulated
Papio_anubis_ADAM19	4.38326	7.31788	27.4103	1.68658e-07	0.000437229	4	6	Up-regulated
Papio_anubis_AHI1	1.71759	9.94688	24.1748	8.96982e-07	0.00193778	4	6	Up-regulated
Papio_anubis_ITGA1	2.37453	7.93797	20.7766	5.2362e-06	0.00969595	4	6	Up-regulated
Papio_anubis_TRIM9	4.89287	6.91938	19.1892	1.19862e-05	0.0194206	4	6	Up-regulated
Papio_anubis_MAP4K3	3.81855	7.18673	17.8048	2.47413e-05	0.035633	4	6	Up-regulated
Sus_scrofa___COX3	2.00742	8.38713	17.0759	3.62754e-05	0.0470201	4	6	Up-regulated

## Sheet: Unassigned_FB
Gene	logFC	logCPM	F	PValue	FDR	Observations_Rejection	Observations_3month_protocol	level
Sus_scrofa___KCNMA1	3.21987	7.93256	55.169	5.00235e-09	5.78675e-05	4	7	Up-regulated
Sus_scrofa___CEMIP	5.30138	6.49158	49.7061	5.98577e-09	5.78675e-05	4	7	Up-regulated
Sus_scrofa___CD44	2.557	6.50062	49.0244	2.05533e-08	0.000132466	4	7	Up-regulated
Sus_scrofa___ADAMTS6	2.35642	8.10524	45.2534	4.53596e-08	0.000219257	4	7	Up-regulated
Sus_scrofa___F13A1	5.65656	6.92782	31.6373	1.23198e-06	0.00309931	4	7	Up-regulated
Sus_scrofa___RUNX1	1.76238	8.58158	31.6434	1.8163e-06	0.00351181	4	7	Up-regulated
Sus_scrofa___RGS2	3.67247	6.19459	27.947	2.80041e-06	0.00492236	4	7	Up-regulated
Sus_scrofa___ENSSSCG00000047553	2.47094	6.34764	28.3403	3.69572e-06	0.00549667	4	7	Up-regulated
Sus_scrofa___HGF	2.02005	7.11783	28.1424	4.90868e-06	0.00636831	4	7	Up-regulated
Sus_scrofa___ENSSSCG00000039222	2.35559	5.05008	26.5037	5.00325e-06	0.00636831	4	7	Up-regulated
Sus_scrofa___DDIT4	2.206	6.9866	27.7118	5.38956e-06	0.00636831	4	7	Up-regulated
Sus_scrofa___FN1	2.10585	9.00309	27.3018	6.43822e-06	0.00636831	4	7	Up-regulated
Sus_scrofa___ENSSSCG00000049885	3.92663	4.3704	25.8603	6.93363e-06	0.00636831	4	7	Up-regulated
Sus_scrofa___TRHDE	3.41405	4.81813	24.9867	7.12765e-06	0.00636831	4	7	Up-regulated
Sus_scrofa___CD163	4.89456	7.45517	25.9973	7.27263e-06	0.00636831	4	7	Up-regulated
Sus_scrofa___KIT	1.92402	7.65661	26.362	8.61339e-06	0.0066616	4	7	Up-regulated
Sus_scrofa___CHST11	1.4847	8.65881	25.9752	9.65439e-06	0.00717952	4	7	Up-regulated
Sus_scrofa___BMPR1B	5.0937	5.11059	24.7324	1.19321e-05	0.00854469	4	7	Up-regulated
Sus_scrofa___ENSSSCG00000016629	1.34261	8.35668	24.2008	1.67748e-05	0.0108113	4	7	Up-regulated
Sus_scrofa___NLGN1	2.71093	4.88989	22.6777	1.77215e-05	0.011053	4	7	Up-regulated
Sus_scrofa___WFDC1	2.13783	7.00132	23.3042	2.15788e-05	0.0130383	4	7	Up-regulated
Sus_scrofa___GALK2	1.33727	8.85564	22.9365	2.52034e-05	0.0147669	4	7	Up-regulated
Sus_scrofa___FNDC1	3.26052	5.30522	20.6723	3.44739e-05	0.0188842	4	7	Up-regulated
Sus_scrofa___NKAIN3	1.84359	6.18273	21.4737	3.48132e-05	0.0188842	4	7	Up-regulated
Sus_scrofa___PAPPA	1.61385	7.99643	21.8674	3.51606e-05	0.0188842	4	7	Up-regulated
Sus_scrofa___POSTN	2.20138	7.84983	21.5558	3.9667e-05	0.0196831	4	7	Up-regulated
Sus_scrofa___CORIN	3.20331	6.73713	21.0579	4.42204e-05	0.0213751	4	7	Up-regulated
Sus_scrofa___ENAH	1.44299	7.87447	21.0738	4.57096e-05	0.021556	4	7	Up-regulated
Sus_scrofa___ENSSSCG00000039009	3.14983	4.94576	19.6736	4.89992e-05	0.0225572	4	7	Up-regulated
Sus_scrofa___RAI14	1.37649	9.24978	20.6883	5.28804e-05	0.0235903	4	7	Up-regulated
Sus_scrofa___CUEDC2	2.47048	4.98835	19.2436	5.86528e-05	0.0252011	4	7	Up-regulated
Sus_scrofa___GPC6	1.44122	9.67063	19.7398	7.3293e-05	0.0301515	4	7	Up-regulated
Sus_scrofa___CSF1R	4.98124	5.63216	19.7877	8.2393e-05	0.0325116	4	7	Up-regulated
Sus_scrofa___BAG3	1.70194	6.01831	18.9761	8.42277e-05	0.0325708	4	7	Up-regulated
Sus_scrofa___SLC1A2	2.40512	6.11293	18.6867	9.62785e-05	0.0365009	4	7	Up-regulated
Sus_scrofa___GPR39	3.37769	5.62884	17.8091	0.000113737	0.0414926	4	7	Up-regulated
Sus_scrofa___DDAH1	1.5859	6.2604	17.6484	0.000137445	0.0466784	4	7	Up-regulated
Sus_scrofa___VCAN	1.27555	9.40742	17.8848	0.000140572	0.0466784	4	7	Up-regulated
Sus_scrofa___ENSSSCG00000029160	3.24569	6.47378	17.0867	0.000143342	0.0466784	4	7	Up-regulated
Sus_scrofa___ENSSSCG00000034610	2.51918	5.72836	17.3511	0.000144852	0.0466784	4	7	Up-regulated
Sus_scrofa___NCAM1	2.10017	7.6277	17.706	0.000149994	0.0475431	4	7	Up-regulated
Sus_scrofa___SERPINE2	1.56751	8.91047	17.5532	0.000156787	0.0488947	4	7	Up-regulated
Sus_scrofa___BANK1	2.77966	6.15894	16.7718	0.00016395	0.0496591	4	7	Up-regulated
Sus_scrofa___DGKI	2.04866	6.23607	17.302	0.000164374	0.0496591	4	7	Up-regulated
Sus_scrofa___HMCN2	-3.80495	8.10665	41.7816	1.03654e-07	0.000400831	4	7	Down-regulated
Sus_scrofa___CA10	-2.85408	6.97576	37.609	2.90357e-07	0.000935676	4	7	Down-regulated
Sus_scrofa___ITIH5	-2.3563	7.61053	32.7116	1.33309e-06	0.00309931	4	7	Down-regulated
Sus_scrofa___GPC5	-3.33039	7.7256	31.2174	1.44266e-06	0.00309931	4	7	Down-regulated
Sus_scrofa___TNXB	-2.10833	8.03293	29.3547	3.50494e-06	0.00549667	4	7	Down-regulated
Sus_scrofa___NTRK2	-2.25646	7.9301	27.5299	6.03461e-06	0.00636831	4	7	Down-regulated
Sus_scrofa___ADAM22	-2.46081	6.6961	26.9865	6.06567e-06	0.00636831	4	7	Down-regulated
Sus_scrofa___TMEFF2	-2.22949	7.64242	26.7059	7.5921e-06	0.00636831	4	7	Down-regulated
Sus_scrofa___MID1	-1.81182	9.23432	26.6157	7.90481e-06	0.00636831	4	7	Down-regulated
Sus_scrofa___VEGFD	-3.30486	6.42532	23.9837	1.52928e-05	0.0105602	4	7	Down-regulated
Sus_scrofa___REV1	-1.35581	8.90268	24.2851	1.63221e-05	0.0108113	4	7	Down-regulated
Sus_scrofa___LVRN	-2.96094	5.84108	21.2567	3.66469e-05	0.0191505	4	7	Down-regulated
Sus_scrofa___CDKL1	-2.09503	6.73897	21.5183	3.97021e-05	0.0196831	4	7	Down-regulated
Sus_scrofa___TBX20	-2.08023	7.6763	20.6679	5.36835e-05	0.0235903	4	7	Down-regulated
Sus_scrofa___EYA2	-2.23426	6.68658	20.0363	6.21077e-05	0.0261055	4	7	Down-regulated
Papio_anubis_RBPJ	-5.77731	4.59699	19.3264	7.62055e-05	0.0306965	4	7	Down-regulated
Sus_scrofa___PTH1R	-2.92308	4.87421	17.9305	0.000104061	0.0386926	4	7	Down-regulated
Sus_scrofa___ABCA8	-1.85532	8.77161	17.985	0.000136064	0.0466784	4	7	Down-regulated
Sus_scrofa___ST3GAL5	-2.34097	6.22202	17.7513	0.000136371	0.0466784	4	7	Down-regulated
Sus_scrofa___OPCML	-2.31641	6.30834	17.7432	0.000137627	0.0466784	4	7	Down-regulated

## Sheet: vFB4
Gene	logFC	logCPM	F	PValue	FDR	Observations_Rejection	Observations_3month_protocol	level
Sus_scrofa___CEMIP	6.52095	7.19564	46.6316	1.98996e-08	0.000179474	4	6	Up-regulated
Sus_scrofa___KCNMA1	4.3096	7.94123	39.2915	5.03193e-07	0.00244564	4	6	Up-regulated
Sus_scrofa___ITPR1	1.38661	9.18089	37.6005	7.66314e-07	0.0024829	4	6	Up-regulated
Sus_scrofa___RESF1	1.95477	6.70446	34.3892	1.62394e-06	0.00337974	4	6	Up-regulated
Sus_scrofa___GPR39	4.33833	5.65558	30.3993	1.81411e-06	0.00337974	4	6	Up-regulated
Sus_scrofa___CHST11	2.05039	8.47552	33.7148	1.87368e-06	0.00337974	4	6	Up-regulated
Sus_scrofa___CORIN	6.45356	6.34498	30.2965	4.02107e-06	0.00605201	4	6	Up-regulated
Sus_scrofa___ENSSSCG00000049691	1.73289	8.92334	30.6266	4.31324e-06	0.00605201	4	6	Up-regulated
Sus_scrofa___FGFR2	2.20648	7.16049	29.6898	4.68735e-06	0.00605201	4	6	Up-regulated
Sus_scrofa___ENSSSCG00000004387	1.44737	9.97452	30.2901	4.6972e-06	0.00605201	4	6	Up-regulated
Sus_scrofa___SV2B	6.2186	4.15295	29.3358	6.19019e-06	0.00744391	4	6	Up-regulated
Sus_scrofa___ENSSSCG00000009293	2.23526	7.24981	28.6117	7.32162e-06	0.00776867	4	6	Up-regulated
Sus_scrofa___GPM6B	1.47979	8.53735	28.2025	8.29242e-06	0.00787256	4	6	Up-regulated
Sus_scrofa___GATA6	3.35492	5.40835	26.535	9.75347e-06	0.00879666	4	6	Up-regulated
Sus_scrofa___STK38L	2.6005	7.00418	26.7027	1.04421e-05	0.00896929	4	6	Up-regulated
Sus_scrofa___PAPPA	2.43865	8.89123	26.8021	1.22344e-05	0.0100311	4	6	Up-regulated
Sus_scrofa___UGP2	1.69261	7.94581	26.493	1.33577e-05	0.0101459	4	6	Up-regulated
Sus_scrofa___RAI14	1.53159	8.81008	26.4321	1.34993e-05	0.0101459	4	6	Up-regulated
Sus_scrofa___FN1	1.86081	8.93062	24.8531	2.11913e-05	0.0147019	4	6	Up-regulated
Sus_scrofa___GABRA2	5.36336	3.7821	25.7957	2.28414e-05	0.0152597	4	6	Up-regulated
Sus_scrofa___TNC	1.86902	8.561	23.2275	2.9263e-05	0.0188516	4	6	Up-regulated
Sus_scrofa___HGF	2.85688	6.66117	22.3199	3.3023e-05	0.0204413	4	6	Up-regulated
Sus_scrofa___TIMP1	2.15069	5.66053	21.7929	3.61653e-05	0.020827	4	6	Up-regulated
Sus_scrofa___ADAMTS6	2.52637	7.21934	22.5641	3.69479e-05	0.020827	4	6	Up-regulated
Sus_scrofa___GBE1	1.14981	8.11739	22.5174	4.25291e-05	0.022563	4	6	Up-regulated
Sus_scrofa___RIPOR2	3.19096	4.65388	20.82	4.41323e-05	0.0227445	4	6	Up-regulated
Sus_scrofa___SAMD12	5.59749	5.08006	22.2035	5.30821e-05	0.0258782	4	6	Up-regulated
Sus_scrofa___USP53	1.61453	8.39321	21.3286	6.13065e-05	0.0283657	4	6	Up-regulated
Sus_scrofa___CFAP20DC	1.30504	6.37738	21.2636	6.13296e-05	0.0283657	4	6	Up-regulated
Sus_scrofa___PALMD	3.18646	5.27105	19.5938	6.95897e-05	0.0313815	4	6	Up-regulated
Sus_scrofa___SLC1A2	3.36587	5.2145	19.1814	7.56851e-05	0.0319944	4	6	Up-regulated
Sus_scrofa___OGDH	1.58778	6.42713	20.2532	7.58375e-05	0.0319944	4	6	Up-regulated
Sus_scrofa___OSBPL3	4.19774	4.9422	19.7192	7.62701e-05	0.0319944	4	6	Up-regulated
Sus_scrofa___TMEM164	2.29266	5.44135	19.1875	7.8525e-05	0.0321917	4	6	Up-regulated
Sus_scrofa___DGKI	4.3291	4.53778	19.8588	8.86524e-05	0.0355358	4	6	Up-regulated
Sus_scrofa___NIBAN1	3.17598	5.85043	19.0704	9.72126e-05	0.0378663	4	6	Up-regulated
Sus_scrofa___ENSSSCG00000027725	2.19681	7.89894	19.8291	9.86647e-05	0.0378663	4	6	Up-regulated
Sus_scrofa___RAMP1	6.8169	4.70925	21.5408	0.000104552	0.0392898	4	6	Up-regulated
Sus_scrofa___EPB41L4B	5.16818	3.89981	20.5546	0.000109984	0.0402363	4	6	Up-regulated
Sus_scrofa___GNAO1	2.79892	4.73909	18.7728	0.000115722	0.0402363	4	6	Up-regulated
Sus_scrofa___PTN	3.13585	5.68378	18.2025	0.000119836	0.0402363	4	6	Up-regulated
Sus_scrofa___WFDC1	2.3882	6.62889	18.7318	0.000120455	0.0402363	4	6	Up-regulated
Sus_scrofa___NKAIN3	2.52921	6.54319	18.6594	0.000134314	0.04405	4	6	Up-regulated
Sus_scrofa___FNDC1	4.29066	5.536	17.6801	0.000138256	0.0445333	4	6	Up-regulated
Sus_scrofa___CA10	-3.2937	7.71188	63.7174	4.02117e-09	7.25339e-05	4	6	Down-regulated
Sus_scrofa___GPC5	-2.96934	8.54565	37.2166	5.42331e-07	0.00244564	4	6	Down-regulated
Sus_scrofa___TMEFF2	-3.01618	8.04041	37.0337	8.2589e-07	0.0024829	4	6	Down-regulated
Sus_scrofa___LVRN	-2.34124	6.29967	35.4645	1.28671e-06	0.00331567	4	6	Down-regulated
Sus_scrofa___VIT	-3.7768	5.70839	27.5042	7.2864e-06	0.00776867	4	6	Down-regulated
Sus_scrofa___ARHGAP20	-3.25399	6.3313	27.3137	7.92692e-06	0.00787256	4	6	Down-regulated
Sus_scrofa___MROH9	-4.46834	4.4423	24.1844	1.52848e-05	0.0110283	4	6	Down-regulated
Sus_scrofa___ITIH5	-2.06483	8.29979	23.2539	3.3997e-05	0.0204413	4	6	Down-regulated
Sus_scrofa___FRMD3	-1.78896	8.48228	22.6895	4.02874e-05	0.0220214	4	6	Down-regulated
Sus_scrofa___ABCA9	-1.63063	8.10126	21.8047	5.28031e-05	0.0258782	4	6	Down-regulated
Sus_scrofa___ST3GAL5	-2.12517	6.20746	19.3201	0.000113094	0.0402363	4	6	Down-regulated
Sus_scrofa___HMCN2	-2.86327	8.79652	19.2621	0.00011826	0.0402363	4	6	Down-regulated

## Sheet: vFB3
Gene	logFC	logCPM	F	PValue	FDR	Observations_Rejection	Observations_3month_protocol	level
Sus_scrofa___TMEM65	2.65189	6.66737	33.3568	8.99113e-07	0.00588908	4	6	Up-regulated
Sus_scrofa___ADAMTS6	3.07997	8.0882	33.4725	1.04318e-06	0.00588908	4	6	Up-regulated
Sus_scrofa___CCND3	1.64977	10.0262	31.8755	1.7007e-06	0.00588908	4	6	Up-regulated
Sus_scrofa___LRRFIP1	1.78303	8.27823	31.2991	2.01933e-06	0.00588908	4	6	Up-regulated
Sus_scrofa___ENSSSCG00000004830	1.68871	9.1584	29.6995	3.17786e-06	0.00681452	4	6	Up-regulated
Sus_scrofa___RAI14	1.84121	9.05892	29.1018	3.78571e-06	0.00721598	4	6	Up-regulated
Sus_scrofa___TNC	2.54659	8.27328	27.9034	5.29682e-06	0.007426	4	6	Up-regulated
Sus_scrofa___CHST11	1.92133	9.06119	27.8526	5.36188e-06	0.007426	4	6	Up-regulated
Sus_scrofa___FNDC1	3.73488	6.22474	26.1538	5.50556e-06	0.007426	4	6	Up-regulated
Sus_scrofa___CORIN	4.05346	6.96521	26.4731	5.62739e-06	0.007426	4	6	Up-regulated
Sus_scrofa___CLIP1	1.84922	8.50215	27.2704	6.54783e-06	0.00802342	4	6	Up-regulated
Sus_scrofa___STK38L	3.1169	7.38915	26.2678	7.41769e-06	0.00816085	4	6	Up-regulated
Sus_scrofa___ENSSSCG00000004387	1.50573	9.83112	26.745	7.6114e-06	0.00816085	4	6	Up-regulated
Sus_scrofa___KCNMA1	2.84548	9.68444	25.8569	9.59205e-06	0.00917108	4	6	Up-regulated
Sus_scrofa___GPM6B	1.81715	8.45426	25.982	9.62282e-06	0.00917108	4	6	Up-regulated
Sus_scrofa___WFDC1	3.40491	6.40463	24.0199	1.21385e-05	0.0104118	4	6	Up-regulated
Sus_scrofa___PAPPA	2.27049	8.89671	24.4727	1.5518e-05	0.0126767	4	6	Up-regulated
Sus_scrofa___IRS2	3.45539	6.06775	22.927	1.7598e-05	0.0133891	4	6	Up-regulated
Sus_scrofa___ENSSSCG00000047553	2.57933	6.23888	23.2426	1.7951e-05	0.0133891	4	6	Up-regulated
Sus_scrofa___VAV3	1.61979	7.93149	23.5731	2.06239e-05	0.0147327	4	6	Up-regulated
Sus_scrofa___ENSSSCG00000002260	1.98975	8.26358	23.4394	2.14699e-05	0.0147327	4	6	Up-regulated
Sus_scrofa___ENSSSCG00000016629	1.79938	9.00627	23.298	2.25259e-05	0.0148628	4	6	Up-regulated
Sus_scrofa___RIMS1	7.12055	5.74834	24.525	2.44244e-05	0.0152475	4	6	Up-regulated
Sus_scrofa___RHOQ	2.27929	6.96106	22.6692	2.48867e-05	0.0152475	4	6	Up-regulated
Sus_scrofa___RAMP1	4.86692	5.08544	22.8884	2.78399e-05	0.0159524	4	6	Up-regulated
Sus_scrofa___GBE1	1.54375	8.2212	22.6435	2.7897e-05	0.0159524	4	6	Up-regulated
Sus_scrofa___NCEH1	3.90486	5.83231	21.078	3.28416e-05	0.0181741	4	6	Up-regulated
Sus_scrofa___ENSSSCG00000027725	2.18075	8.15186	21.9622	3.47903e-05	0.0186509	4	6	Up-regulated
Sus_scrofa___ARNTL2	2.16493	6.28982	21.2408	3.77421e-05	0.0196202	4	6	Up-regulated
Sus_scrofa___VCAN	1.33429	10.1921	21.4542	4.10259e-05	0.0207	4	6	Up-regulated
Sus_scrofa___PDE4B	2.26477	7.45997	20.5117	4.76023e-05	0.0233319	4	6	Up-regulated
Sus_scrofa___ERG	2.39176	6.93653	20.5058	5.27556e-05	0.0247556	4	6	Up-regulated
Sus_scrofa___MCFD2	2.03319	6.41027	19.6777	6.22273e-05	0.0278291	4	6	Up-regulated
Sus_scrofa___ENSSSCG00000035751	2.26801	6.51918	19.4159	6.53977e-05	0.0280475	4	6	Up-regulated
Sus_scrofa___YPEL2	2.18114	7.08359	19.7422	6.94535e-05	0.0283582	4	6	Up-regulated
Sus_scrofa___OSBPL3	3.50511	5.63701	19.0293	7.20566e-05	0.0283582	4	6	Up-regulated
Sus_scrofa___CRLF1	2.41827	5.58731	19.1109	7.7022e-05	0.0293625	4	6	Up-regulated
Sus_scrofa___UBE2H	1.23255	8.77603	19.4324	8.18254e-05	0.0305156	4	6	Up-regulated
Sus_scrofa___RUNX1	1.72693	9.38033	19.2614	8.60104e-05	0.0307888	4	6	Up-regulated
Sus_scrofa___GRM5	3.83819	5.30181	18.4808	8.79425e-05	0.0307888	4	6	Up-regulated
Sus_scrofa___SLC1A7	3.96756	4.83981	18.8216	9.14932e-05	0.0313913	4	6	Up-regulated
Sus_scrofa___NIBAN1	2.23959	6.81571	18.8555	9.44191e-05	0.03176	4	6	Up-regulated
Sus_scrofa___PLEKHG5	2.24365	6.32415	18.5211	9.69097e-05	0.0319709	4	6	Up-regulated
Sus_scrofa___GTF2A1L	1.56331	7.62408	18.6766	0.000106656	0.0345224	4	6	Up-regulated
Sus_scrofa___SLC1A2	3.07383	5.72534	17.5555	0.000115372	0.0366519	4	6	Up-regulated
Sus_scrofa___CEMIP	5.08521	4.68116	17.6832	0.000135569	0.0407484	4	6	Up-regulated
Sus_scrofa___PTGS1	1.38322	7.36486	17.9513	0.000137768	0.0407484	4	6	Up-regulated
Sus_scrofa___ALCAM	2.59821	6.30089	17.2264	0.000153269	0.0445648	4	6	Up-regulated
Sus_scrofa___ITIH5	-2.48963	7.68525	34.9966	7.32549e-07	0.00588908	4	6	Down-regulated
Sus_scrofa___FRMD3	-2.18943	8.32063	31.219	2.05972e-06	0.00588908	4	6	Down-regulated
Sus_scrofa___HUNK	-3.4182	6.14341	29.7647	2.50736e-06	0.00614483	4	6	Down-regulated
Sus_scrofa___ADAM22	-3.14062	6.63118	25.4538	1.06793e-05	0.00964231	4	6	Down-regulated
Sus_scrofa___ENSSSCG00000035525	-3.39364	5.55821	19.9077	5.3393e-05	0.0247556	4	6	Down-regulated
Sus_scrofa___FMO1	-2.43987	7.63729	20.1654	6.32664e-05	0.0278291	4	6	Down-regulated
Sus_scrofa___HMCN2	-3.06015	7.35089	19.778	6.84126e-05	0.0283582	4	6	Down-regulated
Sus_scrofa___TMEFF2	-2.28705	7.35096	19.6095	7.27346e-05	0.0283582	4	6	Down-regulated
Sus_scrofa___ST3GAL5	-2.29729	6.60258	19.192	8.68053e-05	0.0307888	4	6	Down-regulated
Sus_scrofa___ARHGAP20	-2.70669	6.02433	17.7195	0.000128336	0.0400292	4	6	Down-regulated
Sus_scrofa___TNXB	-1.48382	8.83002	17.9901	0.000135718	0.0407484	4	6	Down-regulated
Sus_scrofa___VIT	-2.53347	5.67701	17.1511	0.000157229	0.0449543	4	6	Down-regulated

## Sheet: vCM2_ISG
Gene	logFC	logCPM	F	PValue	FDR	Observations_Rejection	Observations_3month_protocol	level
Sus_scrofa___DIO2	3.81407	3.53615	42.8483	6.86572e-07	0.0167599	4	7	Up-regulated
Sus_scrofa___ANO6	3.85448	6.81549	36.2917	2.49669e-06	0.0304733	4	7	Up-regulated
Sus_scrofa___TRAF3IP2	1.28629	6.95611	33.5526	4.48647e-06	0.0365064	4	7	Up-regulated
Sus_scrofa___STX11	1.62402	3.82645	30.388	9.36254e-06	0.0429729	4	7	Up-regulated
Sus_scrofa___ENSSSCG00000013880	3.24647	5.0562	30.3628	9.36921e-06	0.0429729	4	7	Up-regulated
Sus_scrofa___GLP1R	2.39805	2.9021	29.271	1.24047e-05	0.0429729	4	7	Up-regulated
Sus_scrofa___NIPAL2	2.89688	3.86754	27.6811	1.79451e-05	0.0429729	4	7	Up-regulated
Sus_scrofa___CTSV	2.05922	3.59796	27.6079	1.82333e-05	0.0429729	4	7	Up-regulated
Sus_scrofa___CDC14A	1.44729	8.21119	27.3439	1.9309e-05	0.0429729	4	7	Up-regulated
Sus_scrofa___B4GAT1	3.46874	-0.0635814	24.2751	1.93643e-05	0.0429729	4	7	Up-regulated
Papio_anubis_ENSPANG00000017547	-2.58025	1.50869	26.7224	1.56941e-05	0.0429729	4	7	Down-regulated

## Sheet: Hypoxia_vCM
Gene	logFC	logCPM	F	PValue	FDR	Observations_Rejection	Observations_3month_protocol	level
Sus_scrofa___HELB	2.12386	5.45862	59.2141	2.72524e-08	0.00039316	4	7	Up-regulated
Sus_scrofa___DIO2	4.02933	3.44326	55.8733	4.65084e-08	0.00039316	4	7	Up-regulated
Sus_scrofa___DNAJB9	2.27861	5.097	54.8511	5.58225e-08	0.00039316	4	7	Up-regulated
Sus_scrofa___ACOT7	2.28402	1.78887	52.1654	6.50065e-08	0.00039316	4	7	Up-regulated
Sus_scrofa___EIF4EBP1	2.49164	4.56776	53.2816	7.34138e-08	0.00039316	4	7	Up-regulated
Sus_scrofa___ZNF395	1.33098	7.65408	43.8426	4.07425e-07	0.00157053	4	7	Up-regulated
Sus_scrofa___UPP1	3.08263	4.07175	40.2351	4.10566e-07	0.00157053	4	7	Up-regulated
Sus_scrofa___SH3RF2	2.5715	4.62561	42.0718	5.8914e-07	0.00175566	4	7	Up-regulated
Sus_scrofa___TRAF3IP2	1.32983	6.652	41.4617	6.539e-07	0.00175566	4	7	Up-regulated
Sus_scrofa___UFM1	1.48854	6.1331	40.9794	7.21224e-07	0.00175566	4	7	Up-regulated
Sus_scrofa___SSR3	1.69846	6.43946	37.9666	1.35118e-06	0.00258433	4	7	Up-regulated
Sus_scrofa___ERO1B	1.73285	5.4981	34.9997	2.58624e-06	0.00432823	4	7	Up-regulated
Sus_scrofa___IGF2BP2	1.92174	7.35399	34.2761	3.04182e-06	0.00451101	4	7	Up-regulated
Sus_scrofa___PDIA4	2.26641	3.77024	33.5945	3.60999e-06	0.00483323	4	7	Up-regulated
Sus_scrofa___TGM5	2.51286	1.02079	29.7208	3.95795e-06	0.00504676	4	7	Up-regulated
Sus_scrofa___PLEKHO1	1.89362	2.94433	32.2585	4.74623e-06	0.005611	4	7	Up-regulated
Sus_scrofa___P4HB	1.65127	4.90235	32.1466	4.98461e-06	0.005611	4	7	Up-regulated
Sus_scrofa___CHMP4B	1.48828	6.97303	31.0804	6.40764e-06	0.00600434	4	7	Up-regulated
Sus_scrofa___OSBPL10	1.82787	4.21039	29.5539	9.37418e-06	0.00678412	4	7	Up-regulated
Sus_scrofa___PDIA5	1.65426	6.05499	29.1723	1.0209e-05	0.0070094	4	7	Up-regulated
Sus_scrofa___GEMIN8	1.4499	3.05882	28.8171	1.14262e-05	0.00746245	4	7	Up-regulated
Sus_scrofa___GLP1R	2.37942	2.08482	27.4147	1.20587e-05	0.00765908	4	7	Up-regulated
Sus_scrofa___ENSSSCG00000022032	1.24509	7.36128	28.4262	1.22994e-05	0.00765908	4	7	Up-regulated
Sus_scrofa___TRIB3	3.12709	3.73335	28.2628	1.32413e-05	0.00771936	4	7	Up-regulated
Sus_scrofa___MTPN	1.3348	7.40988	27.9706	1.38023e-05	0.00771936	4	7	Up-regulated
Sus_scrofa___ENSSSCG00000010531	1.18094	5.53538	27.8489	1.42429e-05	0.00771936	4	7	Up-regulated
Sus_scrofa___SYNE3	1.12708	4.85018	27.7692	1.45506e-05	0.00771936	4	7	Up-regulated
Sus_scrofa___GOLGA5	1.01391	5.37943	27.7384	1.46504e-05	0.00771936	4	7	Up-regulated
Sus_scrofa___PDIA6	1.73927	5.2703	27.7183	1.47308e-05	0.00771936	4	7	Up-regulated
Sus_scrofa___SEC23IP	0.902329	5.65527	27.5689	1.52958e-05	0.00771936	4	7	Up-regulated
Sus_scrofa___SLC22A18	2.48474	2.40521	26.963	1.63633e-05	0.00794484	4	7	Up-regulated
Sus_scrofa___CRIM1	1.62737	7.84413	26.3398	2.10246e-05	0.00927065	4	7	Up-regulated
Sus_scrofa___CEBPG	1.2937	4.5121	26.336	2.11192e-05	0.00927065	4	7	Up-regulated
Sus_scrofa___DGKD	1.90368	7.30909	26.2354	2.16102e-05	0.00933317	4	7	Up-regulated
Sus_scrofa___SND1	1.35432	7.33016	25.9165	2.35048e-05	0.00978398	4	7	Up-regulated
Sus_scrofa___TFG	1.16524	6.19594	25.8685	2.38093e-05	0.00978398	4	7	Up-regulated
Sus_scrofa___ENSSSCG00000036669	1.29305	7.32488	25.6644	2.51302e-05	0.00978398	4	7	Up-regulated
Sus_scrofa___GK5	1.52511	5.28378	25.6163	2.54893e-05	0.00978398	4	7	Up-regulated
Sus_scrofa___NDRG1	2.26273	1.77891	23.1084	2.70593e-05	0.00978398	4	7	Up-regulated
Sus_scrofa___ANO6	2.8165	6.17968	25.4347	2.7086e-05	0.00978398	4	7	Up-regulated
Sus_scrofa___ENSSSCG00000011559	1.05216	5.37495	25.3804	2.71256e-05	0.00978398	4	7	Up-regulated
Sus_scrofa___SEC61A1	1.39721	4.69584	25.3832	2.71274e-05	0.00978398	4	7	Up-regulated
Sus_scrofa___ENSSSCG00000013880	3.01194	4.36787	25.4273	2.74041e-05	0.00978398	4	7	Up-regulated
Sus_scrofa___ENSSSCG00000029160	3.49369	4.70389	25.066	2.98415e-05	0.00986916	4	7	Up-regulated
Sus_scrofa___CDC14A	1.39587	7.13251	24.9366	3.05392e-05	0.00986916	4	7	Up-regulated
Sus_scrofa___ENTPD4	1.24171	5.06244	24.9004	3.08655e-05	0.00986916	4	7	Up-regulated
Sus_scrofa___DUSP5	3.4097	4.25042	23.5357	3.09598e-05	0.00986916	4	7	Up-regulated
Sus_scrofa___EGLN3	1.427	7.45844	24.3482	3.58266e-05	0.0109203	4	7	Up-regulated
Sus_scrofa___ENSSSCG00000009208	1.0862	7.15513	23.9562	3.98926e-05	0.0116161	4	7	Up-regulated
Sus_scrofa___XBP1	1.41557	4.08663	23.841	4.1365e-05	0.0116161	4	7	Up-regulated
Sus_scrofa___ENSSSCG00000051689	2.76204	1.38975	21.1972	4.24625e-05	0.0116161	4	7	Up-regulated
Sus_scrofa___RNF144B	1.76502	6.54404	23.711	4.26908e-05	0.0116161	4	7	Up-regulated
Sus_scrofa___ENSSSCG00000012566	1.09203	5.44108	23.6545	4.33792e-05	0.0116161	4	7	Up-regulated
Sus_scrofa___SPIDR	1.53831	6.46124	23.5528	4.46178e-05	0.011713	4	7	Up-regulated
Sus_scrofa___EDEM1	1.70828	4.5278	23.5289	4.50549e-05	0.011713	4	7	Up-regulated
Sus_scrofa___DUSP4	2.65281	2.85081	21.8531	4.96802e-05	0.0126694	4	7	Up-regulated
Sus_scrofa___ENSSSCG00000007735	0.979084	6.72508	22.954	5.27251e-05	0.0130546	4	7	Up-regulated
Sus_scrofa___ZMYND8	0.953753	7.74349	22.9522	5.27465e-05	0.0130546	4	7	Up-regulated
Sus_scrofa___FAM171B	1.84895	3.86075	22.7906	5.61216e-05	0.0134176	4	7	Up-regulated
Sus_scrofa___RABIF	1.62193	2.9743	22.4929	6.11642e-05	0.0141504	4	7	Up-regulated
Sus_scrofa___ANKRD37	1.95127	3.93725	22.4278	6.16855e-05	0.0141504	4	7	Up-regulated
Sus_scrofa___SEC22B	1.09321	4.93064	22.3536	6.25385e-05	0.0141504	4	7	Up-regulated
Sus_scrofa___HERPUD1	1.59368	6.39516	22.1693	6.58747e-05	0.0146994	4	7	Up-regulated
Sus_scrofa___TECTB	2.58719	1.06176	19.7737	6.70738e-05	0.0148433	4	7	Up-regulated
Sus_scrofa___ENSSSCG00000032422	1.78677	3.6033	22.0281	6.94046e-05	0.0150585	4	7	Up-regulated
Sus_scrofa___STC2	1.40678	7.50895	21.9123	7.09026e-05	0.0150585	4	7	Up-regulated
Sus_scrofa___ATF5	2.05355	3.84713	21.8239	7.35618e-05	0.0150585	4	7	Up-regulated
Sus_scrofa___SLC6A6	2.40262	5.69644	21.7845	7.367e-05	0.0150585	4	7	Up-regulated
Sus_scrofa___ADM	2.50987	3.03694	21.5593	7.64633e-05	0.0153944	4	7	Up-regulated
Sus_scrofa___DNAJC3	1.32268	6.33238	21.6134	7.72999e-05	0.0154467	4	7	Up-regulated
Sus_scrofa___ENSSSCG00000036595	1.23443	5.18599	21.5056	7.97987e-05	0.0158279	4	7	Up-regulated
Sus_scrofa___ENSSSCG00000006061	1.07528	8.41788	21.4588	8.08337e-05	0.0158956	4	7	Up-regulated
Sus_scrofa___SEL1L	1.20078	6.12955	21.4382	8.13349e-05	0.0158956	4	7	Up-regulated
Sus_scrofa___SEMA5B	2.03069	1.85102	20.5794	8.44602e-05	0.0162424	4	7	Up-regulated
Sus_scrofa___ENO1	1.34037	8.28632	21.2063	8.70064e-05	0.0164068	4	7	Up-regulated
Sus_scrofa___TXNRD3	1.24497	5.20669	21.1752	8.78556e-05	0.0164511	4	7	Up-regulated
Sus_scrofa___ENSSSCG00000015390	2.4415	1.62011	19.9378	8.89879e-05	0.0165474	4	7	Up-regulated
Sus_scrofa___MTURN	2.22283	2.40564	20.768	9.56219e-05	0.0173005	4	7	Up-regulated
Sus_scrofa___MANF	1.99483	3.59547	20.7222	0.000101219	0.0181781	4	7	Up-regulated
Sus_scrofa___H1-3	2.46862	4.23033	20.7089	0.000102062	0.0181781	4	7	Up-regulated
Sus_scrofa___ENSSSCG00000033720	1.98018	2.84412	20.6692	0.000103737	0.0182747	4	7	Up-regulated
Sus_scrofa___HM13	1.13304	5.69147	20.5477	0.000105655	0.0184909	4	7	Up-regulated
Sus_scrofa___LONP1	1.07973	4.60053	20.4812	0.000107891	0.0186391	4	7	Up-regulated
Sus_scrofa___ETS1	1.87546	5.03469	20.4694	0.000108589	0.0186391	4	7	Up-regulated
Sus_scrofa___CAMK1	1.42393	3.60921	20.4452	0.000109981	0.0187577	4	7	Up-regulated
Sus_scrofa___NSD2	1.24217	5.97251	20.2582	0.000115152	0.0190489	4	7	Up-regulated
Sus_scrofa___HSPH1	2.74885	4.11309	20.2838	0.000115245	0.0190489	4	7	Up-regulated
Sus_scrofa___YBX3	1.27575	8.09019	20.2229	0.000116349	0.019073	4	7	Up-regulated
Sus_scrofa___FKBP7	1.92674	2.48464	20.1868	0.000117577	0.019081	4	7	Up-regulated
Sus_scrofa___GFPT1	1.20664	5.71386	20.0766	0.000121591	0.0191401	4	7	Up-regulated
Sus_scrofa___ATF6	0.897641	8.18516	20.0749	0.000121619	0.0191401	4	7	Up-regulated
Sus_scrofa___TP53BP2	1.25678	6.20039	20.0587	0.00012223	0.0191401	4	7	Up-regulated
Sus_scrofa___TMEM39A	1.10239	5.55979	19.9653	0.000125726	0.0193157	4	7	Up-regulated
Sus_scrofa___CSTB	1.61747	2.59838	19.9896	0.000126901	0.0193157	4	7	Up-regulated
Sus_scrofa___PLAGL1	0.954079	7.71798	19.8591	0.000129774	0.0193157	4	7	Up-regulated
Sus_scrofa___HYOU1	1.61417	4.72837	19.8578	0.000130098	0.0193157	4	7	Up-regulated
Sus_scrofa___YARS1	0.921608	5.23419	19.8408	0.000130546	0.0193157	4	7	Up-regulated
Sus_scrofa___HILPDA	2.23905	1.60734	19.3876	0.000130625	0.0193157	4	7	Up-regulated
Sus_scrofa___MX1	3.58818	5.74785	18.6334	0.00014348	0.0205453	4	7	Up-regulated
Sus_scrofa___PGM3	1.11089	4.36238	19.4722	0.000146169	0.0206607	4	7	Up-regulated
Sus_scrofa___KDM4C	1.02191	9.18105	19.4583	0.000146511	0.0206607	4	7	Up-regulated
Sus_scrofa___AKR1D1	1.69646	5.73675	19.3496	0.000151514	0.0210923	4	7	Up-regulated
Sus_scrofa___RHBDD1	1.04989	5.46214	19.308	0.000153438	0.0210923	4	7	Up-regulated
Sus_scrofa___RNF19B	1.27241	5.21995	19.26	0.000155799	0.0210923	4	7	Up-regulated
Sus_scrofa___DDIT4	2.58322	6.29439	19.2157	0.00015791	0.0210923	4	7	Up-regulated
Sus_scrofa___CRACDL	2.35222	5.2689	19.19	0.000159263	0.0211028	4	7	Up-regulated
Sus_scrofa___SSR1	0.849899	6.23228	19.156	0.000160695	0.0211028	4	7	Up-regulated
Sus_scrofa___ENSSSCG00000032903	1.95273	1.05392	17.7554	0.00016945	0.0219196	4	7	Up-regulated
Sus_scrofa___PRR19	1.92048	1.96736	18.5738	0.000172623	0.0222227	4	7	Up-regulated
Sus_scrofa___FNDC3B	0.834126	10.0923	18.7178	0.000183888	0.0232263	4	7	Up-regulated
Sus_scrofa___CCDC83	1.96806	2.11474	17.9531	0.000187831	0.0233281	4	7	Up-regulated
Sus_scrofa___ENSSSCG00000003079	1.8727	4.03297	18.6715	0.000188715	0.0233281	4	7	Up-regulated
Sus_scrofa___LMAN1	1.22766	4.29973	18.5635	0.000193252	0.0235781	4	7	Up-regulated
Sus_scrofa___TARS1	1.03739	4.74786	18.5451	0.000194189	0.0235781	4	7	Up-regulated
Sus_scrofa___VPS37A	0.790002	6.01544	18.5359	0.000194598	0.0235781	4	7	Up-regulated
Sus_scrofa___CTSH	1.84181	4.94192	18.3283	0.000208004	0.0249763	4	7	Up-regulated
Sus_scrofa___FLT1	1.72654	4.75488	18.2838	0.000211489	0.0252814	4	7	Up-regulated
Sus_scrofa___SESN2	2.4512	5.01912	18.1981	0.000217273	0.0256051	4	7	Up-regulated
Sus_scrofa___PLOD1	1.36327	5.94573	18.1526	0.000219391	0.0256051	4	7	Up-regulated
Sus_scrofa___FAM3B	1.5442	2.70897	18.1832	0.000220077	0.0256051	4	7	Up-regulated
Sus_scrofa___MGAT4A	1.32034	6.81608	18.1301	0.000220891	0.0256051	4	7	Up-regulated
Sus_scrofa___GLRA3	1.39012	3.98963	18.1119	0.000222946	0.0256739	4	7	Up-regulated
Sus_scrofa___ARRDC2	1.9734	3.54581	18.1273	0.000223401	0.0256739	4	7	Up-regulated
Sus_scrofa___TNFSF15	2.67001	0.631198	16.3956	0.000225945	0.0257452	4	7	Up-regulated
Sus_scrofa___ENSSSCG00000047199	3.58289	-0.130664	17.5869	0.000231575	0.0261599	4	7	Up-regulated
Sus_scrofa___SEMA4B	0.782822	6.81359	17.9473	0.00023397	0.0261599	4	7	Up-regulated
Sus_scrofa___TTC3	1.02834	7.64208	17.8848	0.000238617	0.0261599	4	7	Up-regulated
Sus_scrofa___SSR2	1.20338	5.11295	17.8732	0.000239619	0.0261599	4	7	Up-regulated
Sus_scrofa___NARF	0.970319	6.16888	17.8579	0.000240691	0.0261599	4	7	Up-regulated
Sus_scrofa___MTHFD1L	1.98723	3.84014	17.8862	0.000240833	0.0261599	4	7	Up-regulated
Sus_scrofa___SDR42E1	2.06437	1.94152	17.6743	0.000241668	0.0261599	4	7	Up-regulated
Sus_scrofa___TMED7	1.00698	4.41728	17.8406	0.000242299	0.0261599	4	7	Up-regulated
Sus_scrofa___NIBAN2	1.78032	3.99817	17.8397	0.000243261	0.0261599	4	7	Up-regulated
Sus_scrofa___FDX1	0.768419	5.40042	17.747	0.000249325	0.0267047	4	7	Up-regulated
Sus_scrofa___GBE1	1.07715	9.85549	17.7314	0.000250486	0.0267222	4	7	Up-regulated
Sus_scrofa___BACE2	1.26681	7.54508	17.7035	0.00025272	0.0268131	4	7	Up-regulated
Sus_scrofa___DNAJC25	0.963767	4.83023	17.5863	0.000262497	0.0276727	4	7	Up-regulated
Sus_scrofa___NARS1	0.826024	5.81259	17.4671	0.000272508	0.0283977	4	7	Up-regulated
Sus_scrofa___IMPDH1	2.91693	0.549435	15.9912	0.000273208	0.0283977	4	7	Up-regulated
Sus_scrofa___ENSSSCG00000038708	1.07132	6.20124	17.3908	0.000279221	0.0287345	4	7	Up-regulated
Sus_scrofa___SS18	0.854544	8.0178	17.2542	0.000291671	0.0296961	4	7	Up-regulated
Sus_scrofa___SH3PXD2B	1.451	7.30586	17.1931	0.00029747	0.0300579	4	7	Up-regulated
Sus_scrofa___EIF2AK3	0.956434	7.26656	17.114	0.000305128	0.0306308	4	7	Up-regulated
Sus_scrofa___SEC61G	1.20079	5.52786	17.0887	0.000307715	0.0306308	4	7	Up-regulated
Sus_scrofa___IL15	2.3528	2.44857	16.343	0.000349624	0.033669	4	7	Up-regulated
Sus_scrofa___CMC1	0.841691	5.75581	16.6836	0.00035081	0.033669	4	7	Up-regulated
Sus_scrofa___SCNN1A	1.83248	2.50531	16.5899	0.000354447	0.0337563	4	7	Up-regulated
Sus_scrofa___OSMR	1.65019	5.93696	16.6298	0.000357229	0.0337563	4	7	Up-regulated
Sus_scrofa___CDH24	1.90945	1.21142	15.9303	0.000357906	0.0337563	4	7	Up-regulated
Sus_scrofa___PNOC	1.56368	3.2714	16.6439	0.000358023	0.0337563	4	7	Up-regulated
Sus_scrofa___PTPRF	1.85111	1.35985	16.2068	0.000359468	0.0337736	4	7	Up-regulated
Sus_scrofa___SERP1	1.64082	2.27692	16.5863	0.000366723	0.0341657	4	7	Up-regulated
Sus_scrofa___KLHDC1	0.837451	5.63077	16.5308	0.000368745	0.0341657	4	7	Up-regulated
Sus_scrofa___PDK1	1.04543	6.89982	16.3955	0.000385392	0.0353378	4	7	Up-regulated
Sus_scrofa___ANGPTL4	2.96358	3.50133	16.397	0.000386796	0.0353378	4	7	Up-regulated
Sus_scrofa___SERGEF	1.18829	5.84855	16.3602	0.000389952	0.0353378	4	7	Up-regulated
Sus_scrofa___ELAPOR2	1.64526	6.64403	16.3519	0.00039096	0.0353378	4	7	Up-regulated
Sus_scrofa___PTCHD1	2.03795	0.972048	15.4126	0.000401052	0.0357305	4	7	Up-regulated
Sus_scrofa___MRPS30	0.847523	5.93026	16.2599	0.000402981	0.0357305	4	7	Up-regulated
Sus_scrofa___ENSSSCG00000045769	2.95527	3.91977	16.2624	0.000407088	0.0359407	4	7	Up-regulated
Sus_scrofa___CCN4	2.93103	-0.227805	14.9415	0.000408036	0.0359407	4	7	Up-regulated
Sus_scrofa___UTP11	0.811887	4.33803	16.1957	0.000412064	0.0361198	4	7	Up-regulated
Sus_scrofa___ENSSSCG00000002386	0.767168	6.86813	16.1863	0.000412822	0.0361198	4	7	Up-regulated
Sus_scrofa___WSB1	1.1938	8.26006	16.1768	0.000414116	0.0361198	4	7	Up-regulated
Sus_scrofa___FGFR3	3.22054	-0.168533	16.4761	0.000420964	0.0364794	4	7	Up-regulated
Sus_scrofa___H1-0	1.44907	3.32538	16.1313	0.000423919	0.0364993	4	7	Up-regulated
Sus_scrofa___PICALM	0.903944	8.41346	16.0554	0.000431056	0.0368767	4	7	Up-regulated
Sus_scrofa___PPP1R15B	1.12654	3.79989	16.018	0.000437778	0.0373324	4	7	Up-regulated
Sus_scrofa___LYSMD3	0.914942	5.70683	15.9685	0.000443733	0.0375655	4	7	Up-regulated
Sus_scrofa___NUS1	1.16363	4.63398	15.9622	0.000444959	0.0375655	4	7	Up-regulated
Sus_scrofa___DDHD1	0.783065	6.33061	15.952	0.000446123	0.0375655	4	7	Up-regulated
Sus_scrofa___CHIC2	0.81818	6.81158	15.8772	0.000457313	0.0380294	4	7	Up-regulated
Sus_scrofa___SRPRB	1.06155	4.87829	15.8537	0.000461163	0.0380443	4	7	Up-regulated
Sus_scrofa___CCDC82	1.37277	3.73647	15.8591	0.000461863	0.0380443	4	7	Up-regulated
Sus_scrofa___CCDC24	2.05467	1.55753	15.31	0.000478798	0.0384736	4	7	Up-regulated
Sus_scrofa___SH3PXD2A	1.16461	7.1478	15.7367	0.000479223	0.0384736	4	7	Up-regulated
Sus_scrofa___PLAC8L1	1.39082	3.73844	15.6985	0.000487779	0.0389889	4	7	Up-regulated
Sus_scrofa___FAM180A	1.8815	3.56174	15.6967	0.000491123	0.0391393	4	7	Up-regulated
Sus_scrofa___FUT11	1.29718	3.93779	15.6396	0.000497176	0.039271	4	7	Up-regulated
Sus_scrofa___ABHD4	1.16584	6.06947	15.5192	0.00051546	0.0400948	4	7	Up-regulated
Sus_scrofa___KDELR2	1.10872	4.49357	15.5095	0.000517559	0.0400948	4	7	Up-regulated
Sus_scrofa___SYAP1	1.01711	5.42678	15.5007	0.000518736	0.0400948	4	7	Up-regulated
Sus_scrofa___THAP5	0.879687	5.65424	15.4913	0.000520321	0.0400948	4	7	Up-regulated
Sus_scrofa___ARCN1	0.812223	5.66236	15.4869	0.000521081	0.0400948	4	7	Up-regulated
Sus_scrofa___RSAD2	4.25241	5.82462	15.5835	0.000525951	0.0403536	4	7	Up-regulated
Sus_scrofa___REST	0.731943	6.36032	15.4093	0.000534802	0.0404416	4	7	Up-regulated
Sus_scrofa___CDK7	0.804124	5.01049	15.4095	0.000534979	0.0404416	4	7	Up-regulated
Sus_scrofa___NIPAL2	2.05453	3.40407	15.4372	0.000536266	0.0404416	4	7	Up-regulated
Sus_scrofa___CRELD1	1.10324	3.86522	15.4083	0.000536333	0.0404416	4	7	Up-regulated
Sus_scrofa___SARS1	1.20611	5.04751	15.3859	0.000539283	0.0404416	4	7	Up-regulated
Sus_scrofa___FAM162A	0.777209	7.60417	15.3755	0.000540892	0.0404416	4	7	Up-regulated
Sus_scrofa___SNX8	1.07028	6.72275	15.3685	0.000542187	0.0404416	4	7	Up-regulated
Sus_scrofa___ZNF292	0.812984	8.67279	15.3683	0.000542201	0.0404416	4	7	Up-regulated
Sus_scrofa___COPA	0.689351	6.44179	15.3105	0.000552911	0.040786	4	7	Up-regulated
Sus_scrofa___ENSSSCG00000049426	2.97291	0.248611	14.7189	0.000565883	0.0415141	4	7	Up-regulated
Sus_scrofa___ERO1A	1.53436	8.86813	15.1762	0.00057855	0.0422121	4	7	Up-regulated
Sus_scrofa___IFFO2	1.91117	2.18816	15.1037	0.0005816	0.0423193	4	7	Up-regulated
Sus_scrofa___ENSSSCG00000007554	1.79611	3.60348	15.166	0.000584257	0.0423591	4	7	Up-regulated
Sus_scrofa___SERP2	1.08603	4.41787	15.1382	0.000586893	0.0423591	4	7	Up-regulated
Sus_scrofa___PDCD4	1.0338	6.96724	15.0582	0.000602215	0.0431499	4	7	Up-regulated
Sus_scrofa___ARL5B	1.17342	4.70924	15.0549	0.000603366	0.0431499	4	7	Up-regulated
Sus_scrofa___HMOX1	2.21449	1.59606	14.2832	0.000604295	0.0431499	4	7	Up-regulated
Sus_scrofa___PRKCE	0.888054	10.4905	15.0369	0.000606537	0.0431948	4	7	Up-regulated
Sus_scrofa___ARL8B	0.748516	6.57806	15.009	0.000612373	0.0432082	4	7	Up-regulated
Sus_scrofa___PLIN2	1.43844	6.21057	14.9996	0.000614416	0.0432082	4	7	Up-regulated
Sus_scrofa___ENSSSCG00000005768	0.90718	5.24155	14.9982	0.000614793	0.0432082	4	7	Up-regulated
Sus_scrofa___BAALC	2.32081	2.48855	14.7528	0.000618436	0.0433504	4	7	Up-regulated
Sus_scrofa___NUDCD1	1.49871	6.14283	14.9217	0.00063091	0.0441094	4	7	Up-regulated
Sus_scrofa___LIG4	1.10136	2.3192	14.9099	0.000641613	0.0446573	4	7	Up-regulated
Sus_scrofa___KDM5B	0.737973	7.79997	14.8546	0.000645419	0.0446573	4	7	Up-regulated
Sus_scrofa___CARS1	1.09744	4.97052	14.8286	0.000651538	0.0449645	4	7	Up-regulated
Sus_scrofa___HSPA13	1.42599	3.22772	14.8212	0.000658522	0.0452135	4	7	Up-regulated
Sus_scrofa___MTMR14	0.761951	5.54571	14.7801	0.000662201	0.0453354	4	7	Up-regulated
Sus_scrofa___LRR1	1.29177	2.342	14.7936	0.000663684	0.0453354	4	7	Up-regulated
Sus_scrofa___ERLEC1	0.812649	5.41157	14.7483	0.000669477	0.0456147	4	7	Up-regulated
Sus_scrofa___ZDHHC14	1.83528	5.7695	14.7502	0.000671512	0.0456257	4	7	Up-regulated
Sus_scrofa___SCFD2	0.813747	7.88443	14.7248	0.00067475	0.0456257	4	7	Up-regulated
Sus_scrofa___HSPA5	2.04207	5.91286	14.5923	0.000706509	0.0470602	4	7	Up-regulated
Sus_scrofa___TMEM170B	0.778063	4.72772	14.5613	0.000714121	0.0471438	4	7	Up-regulated
Sus_scrofa___SEC23B	1.13104	5.29671	14.5579	0.000714807	0.0471438	4	7	Up-regulated
Sus_scrofa___ACER2	1.47135	2.83289	14.579	0.000718987	0.0472823	4	7	Up-regulated
Sus_scrofa___TRAM2	1.50112	4.68732	14.5236	0.000723736	0.0472823	4	7	Up-regulated
Sus_scrofa___phTBM	2.14279	4.29669	14.9909	0.00072397	0.0472823	4	7	Up-regulated
Sus_scrofa___RPUSD3	1.31421	3.12825	14.5353	0.000726399	0.0473255	4	7	Up-regulated
Sus_scrofa___PNPLA8	0.73854	7.22633	14.4662	0.000737539	0.0477031	4	7	Up-regulated
Sus_scrofa___ZBTB37	0.763341	5.63031	14.4548	0.00074055	0.0477223	4	7	Up-regulated
Sus_scrofa___ENSSSCG00000048793	2.33338	0.575233	13.1968	0.000758885	0.0485068	4	7	Up-regulated
Sus_scrofa___SUPT3H	0.801264	7.69517	14.382	0.000759304	0.0485068	4	7	Up-regulated
Sus_scrofa___ZNF484	1.23484	3.18119	14.4044	0.000760834	0.0485068	4	7	Up-regulated
Sus_scrofa___PLCXD3	1.45538	4.9579	14.3457	0.000769317	0.0489311	4	7	Up-regulated
Sus_scrofa___RASSF1	1.51207	4.85196	14.3046	0.00078112	0.0495641	4	7	Up-regulated
Sus_scrofa___ENSSSCG00000005247	1.67927	5.19185	14.2796	0.000787336	0.0497228	4	7	Up-regulated
Sus_scrofa___GJC1	1.68435	4.6036	14.2697	0.000791425	0.0497553	4	7	Up-regulated
Sus_scrofa___MAP1B	0.787027	7.19951	14.262	0.000791567	0.0497553	4	7	Up-regulated
Sus_scrofa___SMTN	-2.06278	5.76554	41.0985	7.06665e-07	0.00175566	4	7	Down-regulated
Sus_scrofa___KLHL31	-1.91811	6.83589	39.6449	9.48808e-07	0.00211719	4	7	Down-regulated
Sus_scrofa___CCDC141	-1.35635	9.96506	38.9767	1.0907e-06	0.00224658	4	7	Down-regulated
Sus_scrofa___RNF207	-1.69691	6.58657	36.0101	2.06626e-06	0.00368854	4	7	Down-regulated
Papio_anubis_ACTA1	-2.95659	1.78398	32.5864	2.98158e-06	0.00451101	4	7	Down-regulated
Sus_scrofa___ADAMTSL1	-1.45901	7.84322	34.0525	3.20085e-06	0.00451101	4	7	Down-regulated
Sus_scrofa___ADAMTS6	-1.93924	7.76148	32.0966	5.03284e-06	0.005611	4	7	Down-regulated
Sus_scrofa___MYOCD	-1.41106	10.1483	31.9261	5.23864e-06	0.005611	4	7	Down-regulated
Sus_scrofa___ITGB1BP2	-1.95296	6.39788	31.4522	5.8641e-06	0.00600434	4	7	Down-regulated
Sus_scrofa___PTPN4	-1.0575	9.25953	31.0824	6.40349e-06	0.00600434	4	7	Down-regulated
Papio_anubis_KDM6A	-3.49221	1.08666	29.5404	6.60727e-06	0.00600434	4	7	Down-regulated
Sus_scrofa___MRAS	-1.61214	7.59864	30.8774	6.72704e-06	0.00600434	4	7	Down-regulated
Sus_scrofa___CEP85	-1.18649	6.9169	30.7126	7.00038e-06	0.00604675	4	7	Down-regulated
Sus_scrofa___PLEKHM3	-1.40098	8.1404	30.3198	7.69817e-06	0.00631192	4	7	Down-regulated
Sus_scrofa___MYPN	-1.84246	8.81155	30.2769	7.77881e-06	0.00631192	4	7	Down-regulated
Sus_scrofa___LRRC10	-3.65591	0.844756	27.7769	8.60185e-06	0.00676424	4	7	Down-regulated
Sus_scrofa___ENSSSCG00000003839	-1.57432	7.32062	29.7536	8.84148e-06	0.00676424	4	7	Down-regulated
Papio_anubis_ENSPANG00000026399	-5.85098	2.12337	29.9872	9.26506e-06	0.00678412	4	7	Down-regulated
Sus_scrofa___USP28	-1.27109	7.89253	29.2352	1.00472e-05	0.0070094	4	7	Down-regulated
Sus_scrofa___MYOM1	-1.12319	9.86324	28.8363	1.10962e-05	0.0074281	4	7	Down-regulated
Sus_scrofa___OSBPL3	-0.996699	8.22675	28.116	1.33013e-05	0.00771936	4	7	Down-regulated
Sus_scrofa___CPED1	-1.47456	8.67296	27.8416	1.42614e-05	0.00771936	4	7	Down-regulated
Sus_scrofa___SH3KBP1	-1.30734	5.83988	27.526	1.54671e-05	0.00771936	4	7	Down-regulated
Sus_scrofa___ENSSSCG00000004082	-1.06448	8.41312	27.4987	1.55673e-05	0.00771936	4	7	Down-regulated
Sus_scrofa___SLC9B2	-1.39	8.43615	27.2452	1.66154e-05	0.00794484	4	7	Down-regulated
Sus_scrofa___ASPN	-1.84651	5.22934	26.8243	1.85547e-05	0.0087165	4	7	Down-regulated
Sus_scrofa___CORIN	-2.26206	9.1426	26.7433	1.89214e-05	0.0087355	4	7	Down-regulated
Sus_scrofa___WNK2	-1.2635	8.19269	26.3923	2.07368e-05	0.00927065	4	7	Down-regulated
Papio_anubis_CNOT2	-6.31263	1.10681	27.2753	2.24611e-05	0.00954667	4	7	Down-regulated
Sus_scrofa___LGR4	-1.41834	6.74183	25.7492	2.45721e-05	0.00978398	4	7	Down-regulated
Sus_scrofa___STRIP2	-1.25927	6.28138	25.6139	2.54755e-05	0.00978398	4	7	Down-regulated
Sus_scrofa___HACD1	-1.89169	7.25702	25.5726	2.57513e-05	0.00978398	4	7	Down-regulated
Sus_scrofa___AGL	-1.0353	8.15391	25.2523	2.80505e-05	0.00986916	4	7	Down-regulated
Sus_scrofa___TPM1	-1.76803	9.92945	25.0814	2.93672e-05	0.00986916	4	7	Down-regulated
Papio_anubis_DCAF6	-3.79144	1.5877	24.145	2.94804e-05	0.00986916	4	7	Down-regulated
Sus_scrofa___CCK	-2.65345	5.19155	25.0117	2.99701e-05	0.00986916	4	7	Down-regulated
Papio_anubis_PHF20	-5.88151	1.01015	25.2161	3.02843e-05	0.00986916	4	7	Down-regulated
Sus_scrofa___CNKSR3	-1.23843	7.29622	24.7534	3.20876e-05	0.0101083	4	7	Down-regulated
Sus_scrofa___GRB14	-1.65856	6.55477	24.5486	3.39444e-05	0.0105689	4	7	Down-regulated
Sus_scrofa___ENSSSCG00000049158	-1.3638	6.95273	24.3092	3.6211e-05	0.0109203	4	7	Down-regulated
Sus_scrofa___KCNJ3	-1.01745	9.51053	24.299	3.63088e-05	0.0109203	4	7	Down-regulated
Sus_scrofa___MTSS2	-1.33962	5.53038	24.2618	3.67043e-05	0.0109203	4	7	Down-regulated
Sus_scrofa___KANK2	-1.23013	6.77234	23.855	4.10221e-05	0.0116161	4	7	Down-regulated
Sus_scrofa___ACTC1	-3.42373	7.13688	23.7503	4.22669e-05	0.0116161	4	7	Down-regulated
Sus_scrofa___CXADR	-1.285	6.12646	23.7236	4.25457e-05	0.0116161	4	7	Down-regulated
Sus_scrofa___ANKRD39	-1.17555	8.09877	23.6984	4.2833e-05	0.0116161	4	7	Down-regulated
Papio_anubis_USP15	-7.15261	2.04324	24.8553	4.33808e-05	0.0116161	4	7	Down-regulated
Sus_scrofa___SMYD1	-2.39553	6.7932	23.5634	4.44744e-05	0.011713	4	7	Down-regulated
Papio_anubis_KIAA0232	-4.97955	0.300063	22.2546	4.55106e-05	0.0117177	4	7	Down-regulated
Sus_scrofa___MYLK3	-1.25854	8.20796	23.1008	5.05907e-05	0.0127799	4	7	Down-regulated
Sus_scrofa___HOMER1	-0.96958	8.72309	22.9192	5.32373e-05	0.0130546	4	7	Down-regulated
Sus_scrofa___CMYA5	-1.96572	5.00572	22.8822	5.40035e-05	0.0130546	4	7	Down-regulated
Sus_scrofa___PXYLP1	-1.52823	6.70394	22.8617	5.41159e-05	0.0130546	4	7	Down-regulated
Sus_scrofa___SLC9A1	-1.77409	6.519	22.6649	5.72082e-05	0.0135563	4	7	Down-regulated
Sus_scrofa___SRF	-1.29206	4.41784	22.4268	6.13411e-05	0.0141504	4	7	Down-regulated
Sus_scrofa___TP63	-2.87279	4.60468	22.3938	6.21741e-05	0.0141504	4	7	Down-regulated
Sus_scrofa___ENSSSCG00000021374	-1.18101	5.87022	22.3324	6.28861e-05	0.0141504	4	7	Down-regulated
Sus_scrofa___ENSSSCG00000038455	-1.34649	9.30154	21.9547	7.00415e-05	0.0150585	4	7	Down-regulated
Sus_scrofa___DAPL1	-2.44109	4.03659	21.5098	7.01846e-05	0.0150585	4	7	Down-regulated
Papio_anubis_QKI	-3.17809	2.11241	21.1028	7.09572e-05	0.0150585	4	7	Down-regulated
Sus_scrofa___SVIL	-1.17502	10.3735	21.8744	7.16773e-05	0.0150585	4	7	Down-regulated
Sus_scrofa___ENSSSCG00000012700	-1.27882	6.49536	21.8311	7.25882e-05	0.0150585	4	7	Down-regulated
Sus_scrofa___GNAO1	-2.04751	5.15817	21.8286	7.29751e-05	0.0150585	4	7	Down-regulated
Sus_scrofa___NSD1	-1.08437	7.20526	21.7105	7.51528e-05	0.0152452	4	7	Down-regulated
Sus_scrofa___CDH8	-1.92398	6.50583	21.4137	8.19207e-05	0.0158956	4	7	Down-regulated
Sus_scrofa___STOX1	-1.80487	5.13535	21.2788	8.53896e-05	0.0162424	4	7	Down-regulated
Sus_scrofa___ZBTB7C	-1.41413	5.36436	21.275	8.55276e-05	0.0162424	4	7	Down-regulated
Sus_scrofa___CHN1	-1.16046	7.52265	21.1043	8.96444e-05	0.0165545	4	7	Down-regulated
Sus_scrofa___WSCD2	-2.62282	4.78846	21.0625	9.09575e-05	0.016682	4	7	Down-regulated
Sus_scrofa___ENSSSCG00000038605	-2.93956	2.78196	20.4646	9.48101e-05	0.0172703	4	7	Down-regulated
Sus_scrofa___PDE3B	-1.01562	9.47154	20.6487	0.000102509	0.0181781	4	7	Down-regulated
Sus_scrofa___MRTFB	-0.686459	8.44973	20.4719	0.000108028	0.0186391	4	7	Down-regulated
Sus_scrofa___CRHR2	-3.58163	2.52996	19.7552	0.000111811	0.0188309	4	7	Down-regulated
Sus_scrofa___ACOT11	-1.45823	8.44218	20.3561	0.000111817	0.0188309	4	7	Down-regulated
Sus_scrofa___SH3BP5	-1.89735	4.80984	20.296	0.000114057	0.0190489	4	7	Down-regulated
Sus_scrofa___CRYBG3	-1.39435	10.1633	20.2094	0.000116816	0.019073	4	7	Down-regulated
Papio_anubis_DNAJB4	-4.53691	-0.343333	18.4173	0.000119207	0.0191401	4	7	Down-regulated
Sus_scrofa___PFKFB2	-1.72442	4.74263	20.103	0.000120845	0.0191401	4	7	Down-regulated
Sus_scrofa___ENSSSCG00000035617	-1.53831	5.96321	20.0712	0.000121852	0.0191401	4	7	Down-regulated
Sus_scrofa___PDLIM3	-5.10528	0.136567	18.9622	0.000123402	0.0192113	4	7	Down-regulated
Sus_scrofa___RAMP1	-0.991751	7.86552	19.9301	0.000127026	0.0193157	4	7	Down-regulated
Papio_anubis_ENSPANG00000013149	-3.42055	1.06159	19.0177	0.00012808	0.0193157	4	7	Down-regulated
Sus_scrofa___RYR2	-0.908172	13.7715	19.8719	0.00012927	0.0193157	4	7	Down-regulated
Papio_anubis_FBXW7	-6.23863	0.674721	20.897	0.000131287	0.0193157	4	7	Down-regulated
Papio_anubis_PPP1R10	-5.08786	0.237308	18.8843	0.000141994	0.0205453	4	7	Down-regulated
Sus_scrofa___SEMA3C	-1.20541	8.38256	19.5576	0.000142159	0.0205453	4	7	Down-regulated
Sus_scrofa___ARHGEF6	-0.867595	8.23287	19.5443	0.000142734	0.0205453	4	7	Down-regulated
Sus_scrofa___KLHL23	-1.16463	5.18137	19.5318	0.00014337	0.0205453	4	7	Down-regulated
Sus_scrofa___ILK	-1.15445	5.31701	19.4579	0.000146601	0.0206607	4	7	Down-regulated
Sus_scrofa___RCAN2	-1.00344	11.6305	19.4246	0.000148023	0.0207519	4	7	Down-regulated
Papio_anubis_ATP5F1B	-4.73516	0.139134	17.9798	0.00015286	0.0210923	4	7	Down-regulated
Papio_anubis_ZNF207	-6.22674	1.3247	19.8129	0.000154568	0.0210923	4	7	Down-regulated
Sus_scrofa___MYH7B	-0.932996	8.76603	19.2279	0.000157176	0.0210923	4	7	Down-regulated
Papio_anubis_PPP3CB	-5.63947	0.514988	18.7703	0.000157767	0.0210923	4	7	Down-regulated
Sus_scrofa___RNF122	-1.90769	4.86996	19.2185	0.000157842	0.0210923	4	7	Down-regulated
Sus_scrofa___PPP1R3A	-1.11368	6.48844	19.2045	0.000158328	0.0210923	4	7	Down-regulated
Sus_scrofa___RUNX1T1	-0.756227	8.28701	19.1541	0.000160771	0.0211028	4	7	Down-regulated
Sus_scrofa___KLHL41	-1.82891	6.40605	19.1001	0.000163477	0.0213533	4	7	Down-regulated
Sus_scrofa___TMC7	-1.41208	8.57768	19.0125	0.000167911	0.021826	4	7	Down-regulated
Sus_scrofa___LRRC39	-2.32545	6.93857	18.8949	0.000174122	0.0223084	4	7	Down-regulated
Sus_scrofa___SLC22A3	-1.60219	8.86662	18.7838	0.000180178	0.0229743	4	7	Down-regulated
Papio_anubis_EPC1	-4.5436	1.07178	18.5824	0.000182435	0.023152	4	7	Down-regulated
Sus_scrofa___ASB11	-1.64851	4.87643	18.7007	0.00018536	0.0233023	4	7	Down-regulated
Sus_scrofa___PFKM	-1.80768	5.84151	18.6193	0.0001897	0.0233281	4	7	Down-regulated
Sus_scrofa___ENSSSCG00000036052	-1.00162	9.48581	18.6156	0.00018981	0.0233281	4	7	Down-regulated
Sus_scrofa___TTC27	-0.881335	6.01332	18.6143	0.000189921	0.0233281	4	7	Down-regulated
Sus_scrofa___BMP5	-1.3342	5.50991	18.3871	0.000204019	0.0246082	4	7	Down-regulated
Sus_scrofa___CHCHD3	-1.88151	2.45118	17.9282	0.000214632	0.0255235	4	7	Down-regulated
Sus_scrofa___TNNC1	-1.20348	7.12039	18.2099	0.00021542	0.0255235	4	7	Down-regulated
Sus_scrofa___GNB3	-2.3484	3.88596	18.155	0.000220608	0.0256051	4	7	Down-regulated
Sus_scrofa___KIF21A	-0.824734	6.23186	18.0764	0.000224662	0.0257085	4	7	Down-regulated
Sus_scrofa___COQ7	-1.03668	4.59183	18.0124	0.000229417	0.0260301	4	7	Down-regulated
Sus_scrofa___ENSSSCG00000015747	-2.36738	10.0389	17.9542	0.00023344	0.0261599	4	7	Down-regulated
Papio_anubis_MIER1	-3.46743	0.74247	17.3294	0.000239038	0.0261599	4	7	Down-regulated
Papio_anubis_SLC38A1	-5.64369	0.266173	16.9194	0.000240109	0.0261599	4	7	Down-regulated
Sus_scrofa___SVEP1	-1.52244	7.61349	17.8534	0.000240994	0.0261599	4	7	Down-regulated
Sus_scrofa___STK38L	-0.66889	8.57428	17.6957	0.000253341	0.0268131	4	7	Down-regulated
Sus_scrofa___MAPRE2	-1.62342	8.21225	17.5657	0.000264031	0.0277254	4	7	Down-regulated
Papio_anubis_CLINT1	-3.47157	1.15617	16.7838	0.000273616	0.0283977	4	7	Down-regulated
Sus_scrofa___ENSSSCG00000000657	-3.20799	0.948663	16.1923	0.000279595	0.0287345	4	7	Down-regulated
Sus_scrofa___ENSSSCG00000031608	-1.27041	8.79966	17.3808	0.00028008	0.0287345	4	7	Down-regulated
Sus_scrofa___PTDSS1	-1.00768	8.1483	17.3109	0.000286416	0.0292724	4	7	Down-regulated
Sus_scrofa___ROS1	-2.48577	3.6165	16.9062	0.000293562	0.0297755	4	7	Down-regulated
Sus_scrofa___TSPAN11	-1.88866	2.20035	16.6917	0.000305508	0.0306308	4	7	Down-regulated
Sus_scrofa___GFRA1	-2.04262	2.16019	16.8227	0.000307574	0.0306308	4	7	Down-regulated
Sus_scrofa___HIPK3	-0.785126	8.6025	17.0556	0.000310913	0.0307017	4	7	Down-regulated
Sus_scrofa___FBXO40	-1.19483	8.0678	17.0483	0.00031165	0.0307017	4	7	Down-regulated
Sus_scrofa___MED31	-4.87951	-0.0519401	16.0548	0.000312672	0.0307017	4	7	Down-regulated
Sus_scrofa___GFM1	-0.931904	7.8465	17.0347	0.000313013	0.0307017	4	7	Down-regulated
Sus_scrofa___SMCO1	-3.29139	1.29196	16.2952	0.000315343	0.0308173	4	7	Down-regulated
Sus_scrofa___IRS1	-1.14685	6.23243	16.763	0.000341852	0.0332865	4	7	Down-regulated
Sus_scrofa___TBX5	-1.14073	6.89122	16.6918	0.000349831	0.033669	4	7	Down-regulated
Sus_scrofa___PGD	-1.12789	5.36695	16.6891	0.00035028	0.033669	4	7	Down-regulated
Sus_scrofa___GDPD2	-2.41006	3.11932	16.3407	0.000353458	0.0337563	4	7	Down-regulated
Sus_scrofa___SH3BGR	-0.868406	7.29175	16.5814	0.000362627	0.0339512	4	7	Down-regulated
Sus_scrofa___FGF1	-1.02211	8.11409	16.5316	0.000368571	0.0341657	4	7	Down-regulated
Sus_scrofa___ASPDH	-1.57117	11.0451	16.4433	0.000379376	0.0350053	4	7	Down-regulated
Sus_scrofa___CPNE3	-0.919912	9.13262	16.4349	0.000380421	0.0350053	4	7	Down-regulated
Sus_scrofa___ENSSSCG00000040109	-1.0524	10.2903	16.3691	0.000388712	0.0353378	4	7	Down-regulated
Sus_scrofa___SLC24A4	-1.00479	4.56975	16.3482	0.000391953	0.0353378	4	7	Down-regulated
Sus_scrofa___TMEM182	-1.02115	8.89544	16.2964	0.000398108	0.0357305	4	7	Down-regulated
Papio_anubis_SUPT20H	-4.04378	0.647868	15.7258	0.000399508	0.0357305	4	7	Down-regulated
Sus_scrofa___PRKAG1	-1.0761	4.21136	16.2753	0.000401874	0.0357305	4	7	Down-regulated
Sus_scrofa___TRPM7	-0.634307	9.67194	16.1609	0.000416282	0.0361909	4	7	Down-regulated
Sus_scrofa___ATP10D	-1.65337	5.45365	16.1112	0.000423754	0.0364993	4	7	Down-regulated
Sus_scrofa___PLCL2	-0.873204	8.28018	16.0795	0.000427632	0.036701	4	7	Down-regulated
Sus_scrofa___TPM2	-1.35923	9.71686	15.9721	0.000443106	0.0375655	4	7	Down-regulated
Sus_scrofa___ABCC1	-0.827191	7.16875	15.9119	0.000452066	0.0379466	4	7	Down-regulated
Sus_scrofa___PDLIM1	-1.25739	7.97314	15.8943	0.000454706	0.0379512	4	7	Down-regulated
Sus_scrofa___PIGQ	-0.873885	5.34736	15.894	0.000454955	0.0379512	4	7	Down-regulated
Sus_scrofa___TRIM8	-1.28001	2.88192	15.8762	0.000460579	0.0380443	4	7	Down-regulated
Sus_scrofa___ENSSSCG00000033405	-1.8738	3.69679	15.7441	0.000463176	0.0380443	4	7	Down-regulated
Sus_scrofa___COMMD3	-1.11352	5.30793	15.8105	0.000467771	0.0381946	4	7	Down-regulated
Sus_scrofa___ENOX1	-1.58481	9.20473	15.8027	0.000468781	0.0381946	4	7	Down-regulated
Sus_scrofa___REPIN1	-1.44527	2.66203	15.8129	0.000469284	0.0381946	4	7	Down-regulated
Sus_scrofa___ENSSSCG00000012049	-1.85561	5.4169	15.7813	0.000472697	0.0383558	4	7	Down-regulated
Sus_scrofa___CDCA7L	-1.35643	6.12629	15.7403	0.000478718	0.0384736	4	7	Down-regulated
Sus_scrofa___ENSSSCG00000050759	-2.06268	1.79082	15.3414	0.000479897	0.0384736	4	7	Down-regulated
Sus_scrofa___CCNYL1	-1.08302	4.56138	15.6487	0.000493962	0.0391604	4	7	Down-regulated
Sus_scrofa___MAP3K5	-1.10727	10.2443	15.6437	0.000494313	0.0391604	4	7	Down-regulated
Sus_scrofa___ITSN2	-0.714288	7.67565	15.5911	0.000503107	0.0396226	4	7	Down-regulated
Sus_scrofa___ESRRG	-0.82945	9.33872	15.5447	0.000510978	0.0399594	4	7	Down-regulated
Sus_scrofa___RAB20	-1.30239	5.89177	15.544	0.000511268	0.0399594	4	7	Down-regulated
Sus_scrofa___OAZ3	-3.05403	1.74604	14.8032	0.00051186	0.0399594	4	7	Down-regulated
Sus_scrofa___CYC1	-1.04752	5.40233	15.4113	0.000534586	0.0404416	4	7	Down-regulated
Sus_scrofa___TGFB1I1	-1.76468	2.99122	15.429	0.000534897	0.0404416	4	7	Down-regulated
Sus_scrofa___ENSSSCG00000002825	-5.15257	0.417151	15.1048	0.000547175	0.0406628	4	7	Down-regulated
Sus_scrofa___CA14	-1.80706	4.8912	15.3422	0.000548204	0.0406628	4	7	Down-regulated
Sus_scrofa___TBX20	-0.998109	7.20798	15.325	0.00055019	0.0406974	4	7	Down-regulated
Sus_scrofa___GCNT2	-0.972217	8.2496	15.2589	0.000562588	0.0413858	4	7	Down-regulated
Papio_anubis_ENSPANG00000029693	-1.35452	1.95854	15.0602	0.000569559	0.0416697	4	7	Down-regulated
Sus_scrofa___PDLIM7	-1.1443	6.95632	15.1409	0.000585525	0.0423591	4	7	Down-regulated
Papio_anubis_TBC1D15	-3.74025	0.87566	14.8197	0.000595516	0.042866	4	7	Down-regulated
Papio_anubis_RAB3IP	-4.80214	-0.344416	14.0118	0.000611917	0.0432082	4	7	Down-regulated
Papio_anubis_SF3B1	-1.62711	4.02462	15.0181	0.000612661	0.0432082	4	7	Down-regulated
Sus_scrofa___LNP1	-1.98847	3.37024	14.8373	0.000645034	0.0446573	4	7	Down-regulated
Sus_scrofa___BORA	-1.36671	3.38394	14.8697	0.000645384	0.0446573	4	7	Down-regulated
Papio_anubis_MACF1	-2.89456	2.01073	14.4452	0.000655273	0.045106	4	7	Down-regulated
Sus_scrofa___ATP2A2	-1.04248	11.1285	14.7248	0.000674726	0.0456257	4	7	Down-regulated
Sus_scrofa___LNPEP	-0.882679	7.54515	14.6899	0.000682873	0.0460587	4	7	Down-regulated
Sus_scrofa___ITGB6	-2.26745	7.91879	14.6619	0.000689492	0.0462554	4	7	Down-regulated
Sus_scrofa___BAG2	-1.07655	4.50191	14.6609	0.000690344	0.0462554	4	7	Down-regulated
Sus_scrofa___PIM1	-2.18928	2.41984	14.1327	0.000690972	0.0462554	4	7	Down-regulated
Sus_scrofa___PTGES3L	-1.09335	3.99581	14.5977	0.00070622	0.0470602	4	7	Down-regulated
Sus_scrofa___ADCY5	-2.03472	7.6561	14.5612	0.000713778	0.0471438	4	7	Down-regulated
Sus_scrofa___TPST2	-1.03343	5.28329	14.5624	0.00071381	0.0471438	4	7	Down-regulated
Papio_anubis_HNRNPM	-3.63684	0.788265	14.151	0.00072283	0.0472823	4	7	Down-regulated
Sus_scrofa___TMEM52B	-1.27452	4.09902	14.5101	0.000728363	0.0473383	4	7	Down-regulated
Sus_scrofa___RTN4IP1	-0.896636	5.40021	14.4796	0.0007343	0.0476086	4	7	Down-regulated
Sus_scrofa___TNNT2	-1.27704	10.3047	14.451	0.0007414	0.0477223	4	7	Down-regulated
Sus_scrofa___MIB1	-0.778623	7.44562	14.3831	0.000759018	0.0485068	4	7	Down-regulated
Sus_scrofa___DACH1	-1.03826	9.77343	14.2917	0.000783423	0.0495927	4	7	Down-regulated

## Sheet: vFB_ISG
Gene	logFC	logCPM	F	PValue	FDR	Observations_Rejection	Observations_3month_protocol	level
Sus_scrofa___KCNMA1	4.9186	8.78278	43.8334	1.06913e-08	0.000150105	4	5	Up-regulated
Sus_scrofa___CCND3	2.36869	10.0425	33.4305	3.20934e-07	0.00225295	4	5	Up-regulated
Sus_scrofa___PAPPA	2.64329	9.19413	27.0496	2.73923e-06	0.0128196	4	5	Up-regulated
Sus_scrofa___ENSSSCG00000016629	2.55197	8.72791	22.6672	1.33929e-05	0.0378902	4	5	Up-regulated
Sus_scrofa___GALNT16	-4.11598	6.04981	22.3634	1.34937e-05	0.0378902	4	5	Down-regulated

## Sheet: Arterial_EC
Gene	logFC	logCPM	F	PValue	FDR	Observations_Rejection	Observations_3month_protocol	level
Sus_scrofa___KCNN2	2.59174	9.11258	39.4082	5.90569e-10	8.0347e-06	4	7	Up-regulated
Sus_scrofa___DGKI	3.5904	7.67637	36.0264	3.06334e-09	2.08384e-05	4	7	Up-regulated
Sus_scrofa___PLSCR4	2.668	9.07871	33.6963	9.59819e-09	4.35278e-05	4	7	Up-regulated
Sus_scrofa___SERPINE1	2.32854	8.31342	24.0876	1.13571e-06	0.00386282	4	7	Up-regulated
Sus_scrofa___ENSSSCG00000051054	3.1136	7.49996	23.4009	1.60151e-06	0.00392453	4	7	Up-regulated
Sus_scrofa___WFDC1	3.12319	8.2954	22.943	2.01924e-06	0.00392453	4	7	Up-regulated
Sus_scrofa___ARMC2	5.01986	6.77366	21.8448	3.52018e-06	0.00517355	4	7	Up-regulated
Sus_scrofa___MARCHF3	2.28662	8.15044	21.7258	3.73701e-06	0.00517355	4	7	Up-regulated
Sus_scrofa___NRP2	2.73598	7.86287	21.6594	3.85834e-06	0.00517355	4	7	Up-regulated
Sus_scrofa___CPM	2.51	7.81053	21.5003	4.18295e-06	0.00517355	4	7	Up-regulated
Sus_scrofa___PLVAP	2.40999	8.21	20.9196	5.61815e-06	0.00636958	4	7	Up-regulated
Sus_scrofa___HCN1	2.81654	7.95125	20.5403	6.8116e-06	0.00671079	4	7	Up-regulated
Sus_scrofa___ITGAV	2.57934	7.72529	20.513	6.90563e-06	0.00671079	4	7	Up-regulated
Sus_scrofa___FGF13	3.72597	7.1461	19.1526	1.38198e-05	0.0110599	4	7	Up-regulated
Sus_scrofa___KIT	3.44775	7.70885	18.8751	1.59259e-05	0.0114038	4	7	Up-regulated
Sus_scrofa___STAP1	2.83984	7.22126	18.649	1.78541e-05	0.0121453	4	7	Up-regulated
Sus_scrofa___EFEMP1	4.78552	6.75204	18.4222	2.00863e-05	0.0130131	4	7	Up-regulated
Sus_scrofa___HPSE2	3.13594	6.89602	17.6415	2.9942e-05	0.0185164	4	7	Up-regulated
Sus_scrofa___RFX2	2.02115	8.14142	17.2992	3.57192e-05	0.0206351	4	7	Up-regulated
Sus_scrofa___OSBPL3	2.26357	7.67022	17.2604	3.64014e-05	0.0206351	4	7	Up-regulated
Sus_scrofa___LPP	1.50282	10.4185	16.5927	5.14182e-05	0.0279818	4	7	Up-regulated
Sus_scrofa___CYP2C42	2.58346	7.33021	16.4324	5.57499e-05	0.0291722	4	7	Up-regulated
Sus_scrofa___XYLT1	2.88875	7.34101	16.2036	6.27754e-05	0.0316318	4	7	Up-regulated
Sus_scrofa___ADAMTS5	2.9828	7.23964	15.6959	8.16604e-05	0.0385111	4	7	Up-regulated
Sus_scrofa___FN1	1.79451	8.7255	15.6619	8.31351e-05	0.0385111	4	7	Up-regulated
Sus_scrofa___IRAK2	2.23555	7.85597	15.6195	8.49198e-05	0.0385111	4	7	Up-regulated
Sus_scrofa___ARHGAP24	1.92388	8.13578	15.4401	9.32355e-05	0.0399489	4	7	Up-regulated
Sus_scrofa___LTBP1	1.47186	10.7653	15.426	9.39629e-05	0.0399489	4	7	Up-regulated
Sus_scrofa___RSAD2	2.04392	8.56289	15.3014	0.000100149	0.0412889	4	7	Up-regulated
Sus_scrofa___ZFY	3.62932	7.04484	15.1716	0.000107204	0.0428974	4	7	Up-regulated
Sus_scrofa___FAM227B	2.15867	7.61996	15.0449	0.000114366	0.0444556	4	7	Up-regulated
Sus_scrofa___TGFB2	-3.30628	7.43947	23.1978	1.77589e-06	0.00392453	4	7	Down-regulated
Sus_scrofa___RYR2	-2.32109	8.56068	20.3792	7.40683e-06	0.006718	4	7	Down-regulated
Sus_scrofa___SLC6A6	-3.12451	7.55049	19.8705	9.58143e-06	0.00814721	4	7	Down-regulated
Sus_scrofa___RCAN2	-3.53405	7.37952	18.9927	1.49973e-05	0.0113355	4	7	Down-regulated

## Sheet: Meso_EC
Gene	logFC	logCPM	F	PValue	FDR	Observations_Rejection	Observations_3month_protocol	level
Sus_scrofa___COL8A1	3.28361	8.81987	60.4319	8.5461e-15	1.17389e-10	3	6	Up-regulated
Sus_scrofa___CEMIP	5.39132	6.90844	45.0023	2.09949e-11	1.44193e-07	3	6	Up-regulated
Sus_scrofa___LSAMP	3.16839	7.78271	37.7749	8.31271e-10	3.80611e-06	3	6	Up-regulated
Sus_scrofa___PLAT	2.68479	7.97915	29.1208	6.99132e-08	0.000240082	3	6	Up-regulated
Sus_scrofa___ENSSSCG00000039009	2.83991	7.43695	26.1016	3.31265e-07	0.000910051	3	6	Up-regulated
Sus_scrofa___TNC	2.75418	7.43017	25.4634	4.60591e-07	0.00105445	3	6	Up-regulated
Sus_scrofa___PAPPA	2.68213	7.52705	23.3386	1.38325e-06	0.00237505	3	6	Up-regulated
Sus_scrofa___KCNMA1	2.54504	7.13051	21.2936	4.00062e-06	0.00582504	3	6	Up-regulated
Sus_scrofa___HOMER1	5.12835	6.27356	21.1817	4.24071e-06	0.00582504	3	6	Up-regulated
Sus_scrofa___ACTG2	5.10413	6.26747	20.967	4.74215e-06	0.00592165	3	6	Up-regulated
Sus_scrofa___KIT	2.06377	8.78517	20.1823	7.13719e-06	0.0081697	3	6	Up-regulated
Sus_scrofa___IVNS1ABP	2.55682	7.30693	19.0977	1.25731e-05	0.0111498	3	6	Up-regulated
Sus_scrofa___ITGA8	3.26562	6.88661	19.0357	1.29875e-05	0.0111498	3	6	Up-regulated
Sus_scrofa___DAPK1	2.03928	8.66149	18.6968	1.55063e-05	0.0125291	3	6	Up-regulated
Sus_scrofa___NHS	2.097	7.75638	18.0349	2.19304e-05	0.0167353	3	6	Up-regulated
Sus_scrofa___PLVAP	2.10835	8.18031	17.01	3.75534e-05	0.0271491	3	6	Up-regulated
Sus_scrofa___PLOD2	1.97613	8.36773	16.5885	4.68703e-05	0.0321905	3	6	Up-regulated
Sus_scrofa___PALLD	2.56935	6.88097	16.394	5.1924e-05	0.0339633	3	6	Up-regulated
Sus_scrofa___POSTN	2.1063	7.56106	16.1182	6.00438e-05	0.0374891	3	6	Up-regulated
Sus_scrofa___LAMB1	1.71704	8.60457	15.6195	7.81081e-05	0.0466475	3	6	Up-regulated
Sus_scrofa___FAM171B	3.57966	6.45865	15.4074	8.73616e-05	0.0499999	3	6	Up-regulated
Sus_scrofa___RCAN2	-3.07439	8.91733	23.7104	1.14085e-06	0.00223868	3	6	Down-regulated
Sus_scrofa___THSD7A	-2.50579	8.50595	19.9481	8.06456e-06	0.00852114	3	6	Down-regulated
Sus_scrofa___LPL	-5.57498	7.91229	19.6293	9.52467e-06	0.00934506	3	6	Down-regulated

## Sheet: Homeostatic_vFB
Gene	logFC	logCPM	F	PValue	FDR	Observations_Rejection	Observations_3month_protocol	level
Sus_scrofa___ADAMTS6	4.09773	6.25992	61.3135	1.07887e-09	1.40592e-05	4	7	Up-regulated
Sus_scrofa___CEMIP	7.20149	8.3781	60.3144	1.31851e-09	1.40592e-05	4	7	Up-regulated
Sus_scrofa___KCNMA1	5.42753	7.54423	53.6255	1.36558e-08	7.28059e-05	4	7	Up-regulated
Sus_scrofa___ELL2	3.59905	5.14178	39.2133	1.4988e-07	0.000639268	4	7	Up-regulated
Sus_scrofa___OSBPL3	6.0805	4.20013	33.8923	8.8918e-07	0.00316044	4	7	Up-regulated
Sus_scrofa___CORIN	6.6842	5.00854	33.6331	1.06578e-06	0.00324699	4	7	Up-regulated
Sus_scrofa___STK38L	3.46146	6.42844	31.3472	1.72365e-06	0.00459481	4	7	Up-regulated
Sus_scrofa___PPP2CA	3.29624	4.37645	29.104	2.12981e-06	0.00504669	4	7	Up-regulated
Sus_scrofa___ENSSSCG00000031462	1.63057	7.80071	31.2539	2.57624e-06	0.00542375	4	7	Up-regulated
Sus_scrofa___PTX3	2.73405	7.36041	29.7844	2.79759e-06	0.00542375	4	7	Up-regulated
Sus_scrofa___KIT	2.37702	6.34369	29.6894	3.19529e-06	0.00567856	4	7	Up-regulated
Sus_scrofa___CHST11	2.40729	8.09373	27.8108	6.84019e-06	0.00972493	4	7	Up-regulated
Sus_scrofa___FNDC1	4.66737	4.68256	26.0513	9.38515e-06	0.0120509	4	7	Up-regulated
Sus_scrofa___CCN4	4.29229	5.00614	24.7677	9.95375e-06	0.0120509	4	7	Up-regulated
Sus_scrofa___ENSSSCG00000047553	2.98482	5.74676	24.3407	1.39788e-05	0.0156901	4	7	Up-regulated
Sus_scrofa___PAPPA	2.1945	8.81736	24.9024	1.6079e-05	0.017145	4	7	Up-regulated
Sus_scrofa___GYG1	5.27646	3.63629	25.8205	2.11393e-05	0.0205924	4	7	Up-regulated
Sus_scrofa___MCFD2	2.96607	5.24799	22.6425	2.13207e-05	0.0205924	4	7	Up-regulated
Sus_scrofa___MALT1	3.20048	5.06103	22.2309	2.22088e-05	0.0205924	4	7	Up-regulated
Sus_scrofa___ENSSSCG00000016629	2.00726	8.27214	23.186	2.7346e-05	0.0242992	4	7	Up-regulated
Sus_scrofa___RPL22	3.04627	4.68552	21.393	3.17698e-05	0.0271009	4	7	Up-regulated
Sus_scrofa___CD44	3.38603	5.4771	21.2666	3.61415e-05	0.02916	4	7	Up-regulated
Sus_scrofa___ACKR4	2.44359	5.26155	21.6146	3.69183e-05	0.02916	4	7	Up-regulated
Sus_scrofa___ENSSSCG00000004387	1.51694	10.0785	21.805	4.22886e-05	0.0322088	4	7	Up-regulated
Sus_scrofa___PRRG1	1.55079	6.12154	20.7752	4.73302e-05	0.033992	4	7	Up-regulated
Sus_scrofa___ENSSSCG00000016687	1.72875	5.77147	21.0392	4.78176e-05	0.033992	4	7	Up-regulated
Sus_scrofa___TRHDE	4.38048	3.96132	20.0552	5.57059e-05	0.0371245	4	7	Up-regulated
Sus_scrofa___NCAM1	3.64873	6.28676	20.119	6.25369e-05	0.040414	4	7	Up-regulated
Sus_scrofa___TMEM65	2.24036	5.68738	19.9082	7.03982e-05	0.0431764	4	7	Up-regulated
Sus_scrofa___WDSUB1	1.95408	5.03166	19.6597	7.08606e-05	0.0431764	4	7	Up-regulated
Sus_scrofa___DDAH1	2.53323	5.49195	19.3435	7.37897e-05	0.0437122	4	7	Up-regulated
Sus_scrofa___TNFAIP8L3	2.60115	4.25034	18.8497	7.64469e-05	0.0440623	4	7	Up-regulated
Sus_scrofa___GPR39	3.95789	5.45859	19.0401	7.96393e-05	0.0446944	4	7	Up-regulated
Sus_scrofa___RASSF9	2.37991	5.13565	18.9651	8.80595e-05	0.045122	4	7	Up-regulated
Sus_scrofa___GPM6B	1.3113	8.62529	19.5387	8.93214e-05	0.045122	4	7	Up-regulated
Sus_scrofa___MMD	5.81451	4.04857	19.7405	8.95908e-05	0.045122	4	7	Up-regulated
Sus_scrofa___ALCAM	2.73442	4.91337	18.6568	9.09803e-05	0.045122	4	7	Up-regulated
Sus_scrofa___PDGFC	3.31687	4.31256	18.1144	9.54744e-05	0.0462747	4	7	Up-regulated
Sus_scrofa___CA10	-3.126	8.24159	59.1125	3.16751e-09	2.25168e-05	4	7	Down-regulated
Sus_scrofa___TMEFF2	-2.04372	8.6136	27.6953	5.81386e-06	0.00944288	4	7	Down-regulated
Sus_scrofa___GPC5	-2.84809	8.95609	27.2357	6.19902e-06	0.00944288	4	7	Down-regulated
Sus_scrofa___ITIH5	-1.83349	8.78929	26.4246	1.01714e-05	0.0120509	4	7	Down-regulated
Papio_anubis_DIAPH2	-3.82216	4.49901	20.7141	5.0969e-05	0.0350634	4	7	Down-regulated
Sus_scrofa___COL6A6	-2.13086	8.43438	19.3489	8.46611e-05	0.045122	4	7	Down-regulated

[truncated: 41 more sheets: Unassigned_Resident_immune, vCM1, DC_papio, Endocarial_lymphatic_EC, CD4T_act_papio, MP_LYVE1hi_papio, Prolif_lymphoids_papio, vFB5, Hypoxia_EC, CD4T_naive_papio, Cap_EC_ISG, vCM4, MP_TREM2_papio, vFB6, Neuronal_cells, vFB8, Monocytes_papio, vCM3, Unassigned_CM, vCM5 …]
