# Supplementary material for: Integrated Molecular Profiling of Preclinical and Clinical Cardiac Xenotransplants
Source: Research Square preprint supplement (doi:10.21203/rs.3.rs-8406985/v1), 2026-02-04
Supplement: Supplementary file 45 [file ef765705822b81f10a0b88b2.xlsx]

## Sheet: Sheet1
cell_state	condition	Median_Pro-inflammatory	Median_Anti-inflammatory	pval	adj_pval	Significance_Code	log2fc
MP_GBE1_papio	3-month protocol	0.19713	0.23383	1	1		-0.246314
MP_GBE1_papio	Rejection	0.481178	0.19668	0.2	0.278166		1.29072
MP_ISG_papio	3-month protocol	0.473685	0.245555	0.0110723	0.0590521		0.94788
MP_ISG_papio	Rejection	0.56229	0.223943	0.0285714	0.0914286		1.32818
MP_LYVE1hi_papio	3-month protocol	0.222522	0.446953	0.000582751	0.00932401	**	-1.00618
MP_LYVE1hi_papio	Rejection	0.414907	0.347732	0.485714	0.597802		0.254814
MP_LYVE1lo_papio	3-month protocol	0.198318	0.243094	0.208625	0.278166		-0.293701
MP_LYVE1lo_papio	Rejection	0.440597	0.245708	0.0285714	0.0914286		0.842519
MP_NFkB_papio	3-month protocol	0.356157	0.278091	0.804779	0.919747		0.356956
MP_NFkB_papio	Rejection	0.515293	0.248695	0.114286	0.203175		1.05102
MP_TREM2_papio	3-month protocol	0.163809	0.289546	0.0011655	0.00932401	**	-0.821778
MP_TREM2_papio	Rejection	0.368584	0.250572	0.2	0.278166		0.556772
MP_groundstate_papio	3-month protocol	0.182228	0.232512	0.0728438	0.1665		-0.35156
MP_groundstate_papio	Rejection	0.352542	0.173678	0.114286	0.203175		1.02138
Prolif_Myeloids_papio	3-month protocol	0.111697	0.182585	0.901515	0.961616		-0.708972
Prolif_Myeloids_papio	Rejection	0.341627	0.162727	0.0571429	0.152381		1.06997
