# Supplementary material for: Integrated Molecular Profiling of Preclinical and Clinical Cardiac Xenotransplants
Source: Research Square preprint supplement (doi:10.21203/rs.3.rs-8406985/v1), 2026-02-04
Supplement: Supplementary file 46 [file f00ef4aaae1c73365f474db3.xlsx]

## Sheet: MP_ISG_papio
Gene	scores	log2FC	pvals	FDR
Papio_anubis_GBP3	24.0216	2.17623	1.65228e-127	8.89359e-123
Papio_anubis_ENSPANG00000004762	19.7939	1.9958	3.3621e-87	9.04843e-83
Papio_anubis_MYOF	16.4168	1.18716	1.45035e-60	2.60222e-56
Papio_anubis_XRN1	16.0707	1.15053	4.09565e-58	5.51131e-54
Papio_anubis_DRAM1	15.3668	1.57074	2.73162e-53	2.94065e-49
Papio_anubis_SLC8A1	15.2076	0.828405	3.14798e-52	2.82405e-48
Papio_anubis_TOX	14.3262	1.37298	1.50026e-46	1.08879e-42
Papio_anubis_RNF213	14.321	1.13651	1.61823e-46	1.08879e-42
Papio_anubis_JAK2	14.0633	0.962643	6.38805e-45	3.82048e-41
Papio_anubis_SAMD4A	13.4826	1.12482	1.98058e-41	1.06607e-37
Papio_anubis_LYN	13.3316	0.841314	1.51554e-40	7.41595e-37
Papio_anubis_EPSTI1	13.1935	0.847643	9.57027e-40	4.29274e-36
Papio_anubis_PARP14	12.7647	1.03823	2.58105e-37	1.06867e-33
Papio_anubis_RIGI	12.5355	1.52322	4.77419e-36	1.83554e-32
Papio_anubis_ALPK1	12.5177	0.87139	5.97669e-36	2.14467e-32
Papio_anubis_DENND1A	12.4741	0.779337	1.03397e-35	3.47839e-32
Papio_anubis_WARS1	12.383	1.68217	3.22914e-35	1.02242e-31
Papio_anubis_NHSL1	11.7001	1.29515	1.27356e-31	3.42754e-28
Papio_anubis_CD38	11.629	2.4953	2.93626e-31	7.52605e-28
Papio_anubis_STAT1	11.4232	1.03626	3.20401e-30	7.69388e-27
Papio_anubis_ENSPANG00000026399	11.4209	0.800131	3.28762e-30	7.69388e-27
Papio_anubis_IDO1	11.2606	2.42884	2.05409e-29	4.6068e-26
Papio_anubis_EXT1	11.2274	1.08642	2.99016e-29	6.43794e-26
Papio_anubis_APOL2	11.1251	1.52559	9.46685e-29	1.95986e-25
Papio_anubis_MX1	11.0434	1.35252	2.35823e-28	4.53336e-25
Papio_anubis_ANKRD22	11.0087	2.37477	3.47054e-28	6.44156e-25
Papio_anubis_CIITA	10.8039	0.921499	3.29844e-27	5.91807e-24
Papio_anubis_IFI27	10.6683	1.9715	1.43223e-26	2.40909e-23
Papio_anubis_GSAP	10.4251	0.784457	1.90361e-25	3.10497e-22
Papio_anubis_ZDHHC14	10.2215	0.900688	1.58808e-24	2.51411e-21
Papio_anubis_CUL1	10.1981	0.925579	2.02185e-24	3.10938e-21
Papio_anubis_FYB1	10.1694	0.773759	2.71681e-24	4.06209e-21
Papio_anubis_TCF7L2	9.76161	0.817511	1.64521e-22	2.33039e-19
Papio_anubis_DYSF	9.51167	1.95304	1.87633e-21	2.58962e-18
Papio_anubis_SASH1	9.47755	1.24973	2.60332e-21	3.50316e-18
Papio_anubis_CERS6	9.28841	0.938323	1.5661e-20	2.05602e-17
Papio_anubis_CXCL10	9.25926	3.29091	2.05857e-20	2.6382e-17
Papio_anubis_TFEC	9.12004	1.21116	7.50983e-20	9.40056e-17
Papio_anubis_RAPGEF2	9.08111	0.846904	1.07475e-19	1.28555e-16
Papio_anubis_RBMS1	9.05987	0.91365	1.30612e-19	1.52833e-16
Papio_anubis_ARHGAP31	8.95795	0.839248	3.30756e-19	3.78793e-16
Papio_anubis_SIK3	8.84186	0.761122	9.4141e-19	1.05567e-15
Papio_anubis_SCLT1	8.71941	0.942539	2.79662e-18	3.01061e-15
Papio_anubis_DDX60L	8.53588	0.946953	1.39097e-17	1.43982e-14
Papio_anubis_PRKCA	8.50257	0.866363	1.8544e-17	1.8833e-14
Papio_anubis_HERC6	8.44302	0.955653	3.09237e-17	3.02636e-14
Papio_anubis_GK	8.38767	1.23228	4.95889e-17	4.76638e-14
Papio_anubis_HERC5	8.2334	1.55507	1.8197e-16	1.71837e-13
Papio_anubis_RAB20	8.14052	0.88517	3.93573e-16	3.65249e-13
Papio_anubis_NFKB1	8.13293	1.0068	4.1904e-16	3.82292e-13
Papio_anubis_PARP9	8.03981	0.776324	8.99796e-16	8.07207e-13
Papio_anubis_RUFY3	8.03049	0.815643	9.70835e-16	8.56659e-13
Papio_anubis_NCF1	7.96357	0.756712	1.67141e-15	1.42802e-12
Papio_anubis_MX2	7.9457	0.816287	1.93091e-15	1.62396e-12
Papio_anubis_ATP10A	7.88696	1.82511	3.09629e-15	2.52516e-12
Papio_anubis_TCF7L1	7.81881	1.48754	5.33257e-15	4.22104e-12
Papio_anubis_SOD2	7.6159	1.56524	2.61854e-14	2.04269e-11
Papio_anubis_CYBB	7.47605	1.05167	7.65889e-14	5.8063e-11
Papio_anubis_GUCY1A1	7.42054	0.755089	1.1664e-13	8.60038e-11
Papio_anubis_RIPK2	7.38686	1.55457	1.50336e-13	1.09351e-10
Papio_anubis_SCIMP	7.29768	1.02464	2.92767e-13	2.02032e-10
Papio_anubis_GCH1	7.25847	2.32517	3.91501e-13	2.66746e-10
Papio_anubis_LAP3	7.15926	1.00519	8.11125e-13	5.45745e-10
Papio_anubis_PTPN2	6.94765	0.872973	3.71414e-12	2.40864e-09
Papio_anubis_SPATS2L	6.80516	1.0161	1.0094e-11	6.24503e-09
Papio_anubis_PLA2G4A	6.79835	0.75972	1.05824e-11	6.40008e-09
Papio_anubis_CASP5	6.76474	0.848703	1.33549e-11	7.89933e-09
Papio_anubis_CGAS	6.76474	1.05286	1.33549e-11	7.89933e-09
Papio_anubis_TBC1D8	6.73365	0.752525	1.65462e-11	9.47464e-09
Papio_anubis_TNFAIP8	6.66667	0.759826	2.61663e-11	1.46711e-08
Papio_anubis_PTPN1	6.58526	0.885368	4.54087e-11	2.51976e-08
Papio_anubis_PRKCE	6.49918	0.812581	8.07612e-11	4.34705e-08
Papio_anubis_HIVEP3	6.41944	0.805565	1.3678e-10	7.14791e-08
Papio_anubis_AGFG1	6.41298	0.816609	1.42701e-10	7.38558e-08
Papio_anubis_ENSPANG00000019535	6.28592	0.817172	3.25912e-10	1.65112e-07
Papio_anubis_NLRC5	6.20417	0.763562	5.49847e-10	2.69574e-07
Papio_anubis_BRINP3	6.14792	1.30064	7.85052e-10	3.70668e-07
Papio_anubis_KIAA1549L	6.04874	1.32618	1.45983e-09	6.6031e-07
Papio_anubis_TAP1	6.04095	1.07623	1.53214e-09	6.81561e-07
Papio_anubis_EZH2	5.94605	1.19277	2.74685e-09	1.20205e-06
Papio_anubis_NBN	5.92789	0.936639	3.06848e-09	1.33197e-06
Papio_anubis_IL7	5.90002	0.789865	3.63457e-09	1.55265e-06
Papio_anubis_SYNE2	5.76271	1.42597	8.2774e-09	3.30029e-06
Papio_anubis_ACSL1	5.68167	0.872483	1.33389e-08	4.98598e-06
Papio_anubis_IL15RA	5.56023	1.19148	2.6942e-08	9.66788e-06
Papio_anubis_PARP11	5.53743	0.936318	3.06945e-08	1.08695e-05
Papio_anubis_PAG1	5.45232	0.850295	4.97169e-08	1.71543e-05
Papio_anubis_PANX1	5.32347	1.07027	1.01809e-07	3.34144e-05
Papio_anubis_BCL2L14	5.294	1.26219	1.19667e-07	3.83404e-05
Papio_anubis_IGF2R	5.26119	0.824065	1.43123e-07	4.55841e-05
Papio_anubis_ENSPANG00000045273	5.26005	1.0239	1.44018e-07	4.55995e-05
Papio_anubis_CCL8	5.21675	1.32731	1.82089e-07	5.69833e-05
Papio_anubis_USP6NL	5.14082	0.912042	2.73543e-07	8.41354e-05
Papio_anubis_MBOAT1	5.13287	0.814846	2.85352e-07	8.58064e-05
Papio_anubis_SLC1A3	5.08776	1.31257	3.62312e-07	0.000105988
Papio_anubis_IRF1	5.07895	1.26546	3.79516e-07	0.000110315
Papio_anubis_CASP12	5.05023	0.810826	4.41269e-07	0.000125671
Papio_anubis_IL1RAP	5.03679	1.08097	4.73398e-07	0.000132027
Papio_anubis_STON2	5.02531	1.28072	5.02621e-07	0.000139454
Papio_anubis_PSTPIP2	4.98225	1.16468	6.28495e-07	0.000172599

## Sheet: DC_papio
Gene	scores	log2FC	pvals	FDR
Papio_anubis_AFF3	15.3215	5.16388	5.49228e-53	2.95628e-48
Papio_anubis_WDFY4	11.6955	2.48183	1.34428e-31	3.61785e-27
Papio_anubis_CCSER1	10.5227	2.62827	6.79084e-26	1.21841e-21
Papio_anubis_CPVL	9.59776	3.85841	8.17026e-22	1.09943e-17
Papio_anubis_LRRK2	9.52369	1.57044	1.6714e-21	1.7993e-17
Papio_anubis_ADAM19	9.49154	2.50157	2.27645e-21	2.0422e-17
Papio_anubis_NCKAP5	9.35054	5.06049	8.71994e-21	6.70513e-17
Papio_anubis_DST	9.0823	1.6957	1.06306e-19	7.15252e-16
Papio_anubis_CIITA	9.05512	1.37265	1.36422e-19	8.15892e-16
Papio_anubis_CLNK	8.84624	5.92004	9.05148e-19	4.87205e-15
Papio_anubis_FLT3	8.58138	3.04563	9.37395e-18	4.58693e-14
Papio_anubis_NIBAN1	8.38137	1.22317	5.2316e-17	2.34663e-13
Papio_anubis_ENSPANG00000024299	7.98764	1.72705	1.37549e-15	5.02321e-12
Papio_anubis_NEGR1	7.98154	2.7893	1.44522e-15	5.02321e-12
Papio_anubis_ENSPANG00000022056	7.93873	1.49097	2.04262e-15	6.10813e-12
Papio_anubis_CD74	7.80179	0.891242	6.10344e-15	1.5644e-11
Papio_anubis_HSPA12A	7.30597	2.98111	2.75281e-13	6.44229e-10
Papio_anubis_SULF2	7.10028	2.37781	1.24506e-12	2.48209e-09
Papio_anubis_BCL11A	6.97443	5.20933	3.07119e-12	5.70034e-09
Papio_anubis_UVRAG	6.83139	0.919609	8.40963e-12	1.50886e-08
Papio_anubis_HIP1	6.73571	1.45015	1.63134e-11	2.74402e-08
Papio_anubis_SLC24A4	6.69224	4.31163	2.19774e-11	3.47928e-08
Papio_anubis_TRERF1	6.62481	1.20132	3.47705e-11	5.34731e-08
Papio_anubis_CCDC88A	6.57513	0.988701	4.86115e-11	7.26824e-08
Papio_anubis_ITGA4	6.53177	1.07384	6.49977e-11	9.45559e-08
Papio_anubis_FCHSD2	6.49785	1.47614	8.14754e-11	1.12449e-07
Papio_anubis_DENND1B	6.44864	0.890537	1.12857e-10	1.51866e-07
Papio_anubis_RIPOR2	6.43491	1.78526	1.23546e-10	1.62195e-07
Papio_anubis_PAK1	6.31814	1.67105	2.64735e-10	3.31387e-07
Papio_anubis_MICAL2	6.30711	1.78521	2.84289e-10	3.47776e-07
Papio_anubis_SCARB1	5.91521	1.26295	3.31444e-09	3.64088e-06
Papio_anubis_PTPN22	5.89078	2.15172	3.84375e-09	4.13787e-06
Papio_anubis_IRF8	5.77179	2.57991	7.84337e-09	7.8181e-06
Papio_anubis_ASAP1	5.73135	0.903365	9.96368e-09	9.57687e-06
Papio_anubis_SPECC1	5.65839	1.11902	1.52799e-08	1.34829e-05
Papio_anubis_SAMD12	5.60288	2.42265	2.10817e-08	1.83023e-05
Papio_anubis_DOCK5	5.59212	1.63064	2.24317e-08	1.91652e-05
Papio_anubis_RFTN1	5.45914	1.13551	4.78458e-08	3.74378e-05
Papio_anubis_SLC38A1	5.42195	1.51306	5.89524e-08	4.46926e-05
Papio_anubis_ENSPANG00000018541	5.41664	2.002	6.07293e-08	4.54002e-05
Papio_anubis_SP110	5.36174	0.75295	8.24258e-08	6.07761e-05
Papio_anubis_LRRK1	5.3513	1.03576	8.73222e-08	6.35163e-05
Papio_anubis_MSI2	5.30384	1.41831	1.13389e-07	8.13771e-05
Papio_anubis_VRK2	5.28318	0.949983	1.26961e-07	8.99183e-05
Papio_anubis_ITGAX	5.14324	1.15725	2.70035e-07	0.000177255
Papio_anubis_CBFA2T3	5.13686	2.51273	2.79364e-07	0.000181169
Papio_anubis_SHTN1	5.0409	1.0864	4.6335e-07	0.000290003
Papio_anubis_CARD11	4.99593	3.21176	5.8554e-07	0.000354127
Papio_anubis_CPPED1	4.96168	1.3919	6.98875e-07	0.000417974
Papio_anubis_CDK14	4.93203	1.4707	8.13805e-07	0.000481361
Papio_anubis_ZNF366	4.70221	4.49196	2.57363e-06	0.00138528
Papio_anubis_LPCAT2	4.6284	1.2745	3.68504e-06	0.00196387
Papio_anubis_ENSPANG00000004762	4.43775	0.983934	9.09027e-06	0.00457283
Papio_anubis_HLA-DPB1	4.39516	0.767023	1.10689e-05	0.00551661
Papio_anubis_CD226	4.38398	3.48104	1.16528e-05	0.00570205
Papio_anubis_TMEM131L	4.29302	0.824142	1.76261e-05	0.00839594
Papio_anubis_FES	4.28756	1.08013	1.80644e-05	0.00845508
Papio_anubis_RAB30	4.26877	2.13779	1.96552e-05	0.00904281
Papio_anubis_ZEB1	4.26876	3.2547	1.96561e-05	0.00904281
Papio_anubis_ADGRG5	4.25778	1.22589	2.06468e-05	0.00933382
Papio_anubis_ENSPANG00000011771	4.2329	7.18472	2.30699e-05	0.0101784
Papio_anubis_HLCS	4.18808	0.793558	2.81322e-05	0.0120178
Papio_anubis_PCF11	4.183	1.02511	2.87686e-05	0.0121929
Papio_anubis_INPP5F	4.16589	1.43335	3.10145e-05	0.0129491
Papio_anubis_SEL1L3	4.15853	2.97112	3.20307e-05	0.0130573
Papio_anubis_HLA-DMB	4.12977	1.1378	3.63122e-05	0.0144781
Papio_anubis_PID1	4.06972	2.58447	4.70706e-05	0.0183596
Papio_anubis_TTC7A	4.04225	1.19439	5.29401e-05	0.0202608
Papio_anubis_CALCRL	4.01134	2.08456	6.03739e-05	0.0227251
Papio_anubis_LSP1	4.00101	0.956776	6.30735e-05	0.0235763
Papio_anubis_RUNX2	3.99661	1.27621	6.4255e-05	0.0238523
Papio_anubis_LPGAT1	3.98239	0.903349	6.82247e-05	0.0247977
Papio_anubis_CCDC6	3.98223	1.20017	6.82726e-05	0.0247977
Papio_anubis_TAB2	3.95498	0.798832	7.65401e-05	0.0274657
Papio_anubis_AUTS2	3.91574	2.0197	9.01289e-05	0.0321277
Papio_anubis_ARID5B	-3.81625	-0.786734	0.000135493	0.0467502
Papio_anubis_KIF1B	-3.82454	-0.943464	0.000131016	0.0454972
Papio_anubis_STARD13	-3.85165	-1.61686	0.000117325	0.0410073
Papio_anubis_SH3PXD2A	-3.86115	-2.38619	0.000112853	0.039702
Papio_anubis_SPRED1	-3.98315	-0.969148	6.80068e-05	0.0247977
Papio_anubis_DIP2B	-4.01807	-0.86307	5.86768e-05	0.0222418
Papio_anubis_ADAP2	-4.05146	-1.05647	5.08999e-05	0.0197104
Papio_anubis_CSF1R	-4.10251	-0.886778	4.08695e-05	0.0161753
Papio_anubis_WDFY3	-4.13588	-0.761402	3.53591e-05	0.0142033
Papio_anubis_SCARB2	-4.15687	-2.05076	3.22636e-05	0.0130573
Papio_anubis_FNDC3B	-4.16398	-0.989196	3.12745e-05	0.0129491
Papio_anubis_ULK2	-4.2479	-1.34821	2.15784e-05	0.00959901
Papio_anubis_TNFRSF21	-4.25603	-1.98396	2.08089e-05	0.00933382
Papio_anubis_RIN2	-4.26276	-1.34558	2.01922e-05	0.00921071
Papio_anubis_LHFPL2	-4.50636	-1.95135	6.59499e-06	0.00334888
Papio_anubis_LGMN	-4.5414	-1.54788	5.58821e-06	0.00289222
Papio_anubis_NRP2	-4.5763	-1.54092	4.7326e-06	0.00249742
Papio_anubis_MITF	-4.70312	-0.87787	2.56211e-06	0.00138528
Papio_anubis_TNS1	-4.70788	-1.88015	2.50304e-06	0.00137478
Papio_anubis_SNX24	-4.75542	-1.15606	1.98039e-06	0.00109893
Papio_anubis_SDC2	-4.77339	-1.6642	1.81147e-06	0.00101567
Papio_anubis_AGAP1	-4.82628	-1.99036	1.39108e-06	0.000796239
Papio_anubis_ATP6V0A1	-4.88801	-0.892506	1.01859e-06	0.000595942
Papio_anubis_ENSPANG00000015284	-5.21896	-1.32598	1.79933e-07	0.000121063
Papio_anubis_DRAM1	-5.24895	-1.82526	1.52968e-07	0.000104224

## Sheet: MP_LYVE1hi_papio
Gene	scores	log2FC	pvals	FDR
Papio_anubis_SLC9A9	35.1579	1.56571	8.81512e-271	4.74482e-266
Papio_anubis_PSD3	34.0574	2.29043	3.14925e-254	8.47557e-250
Papio_anubis_DAB2	29.8072	1.92796	3.14994e-195	5.65162e-191
Papio_anubis_MRC1	29.6495	1.79988	3.44183e-193	4.63149e-189
Papio_anubis_CPM	29.5968	2.11956	1.6422e-192	1.76786e-188
Papio_anubis_WWP1	28.6729	1.61399	8.29764e-181	7.44381e-177
Papio_anubis_COLEC12	28.6274	2.52132	3.06095e-180	2.3537e-176
Papio_anubis_ENSPANG00000017243	28.1603	2.31415	1.79028e-174	1.20455e-170
Papio_anubis_FRMD4B	27.9495	1.25475	6.68147e-172	3.99596e-168
Papio_anubis_IQGAP2	27.523	1.32191	9.30506e-167	5.00854e-163
Papio_anubis_PDGFC	27.4739	2.49879	3.60114e-166	1.76213e-162
Papio_anubis_RBPJ	27.1128	1.39378	6.96051e-162	3.12214e-158
Papio_anubis_F13A1	24.6037	1.77973	1.15249e-133	4.43099e-130
Papio_anubis_ITSN1	23.8023	1.44263	3.16355e-125	1.13521e-121
Papio_anubis_CD163	23.7648	1.64669	7.71698e-125	2.59609e-121
Papio_anubis_RGL1	23.3738	1.64753	7.90125e-121	2.50172e-117
Papio_anubis_NRP1	20.7268	2.02726	1.98561e-95	5.93763e-92
Papio_anubis_MTSS1	19.9905	0.897931	6.66636e-89	1.88854e-85
Papio_anubis_SH3PXD2A	19.1285	1.98935	1.46146e-81	3.93323e-78
Papio_anubis_MAN1A1	18.546	1.00681	8.78162e-77	2.25085e-73
Papio_anubis_EPS15	18.0767	0.861207	4.85949e-73	1.18894e-69
Papio_anubis_CCDC141	18.0647	3.11427	6.04891e-73	1.4156e-69
Papio_anubis_TNS3	17.3436	0.938074	2.20356e-67	4.94203e-64
Papio_anubis_ENSPANG00000011719	16.4074	1.08125	1.69423e-60	3.64774e-57
Papio_anubis_PLD1	15.9661	1.54258	2.2025e-57	4.39081e-54
Papio_anubis_IGF1	15.8321	2.6875	1.86868e-56	3.59227e-53
Papio_anubis_ABCC5	15.8013	1.09212	3.04847e-56	5.65817e-53
Papio_anubis_CTSC	15.4134	1.18209	1.3298e-53	2.38593e-50
Papio_anubis_SLCO2B1	15.1884	1.01734	4.22312e-52	7.3327e-49
Papio_anubis_LGMN	14.993	1.15752	8.15488e-51	1.33014e-47
Papio_anubis_TTN	14.4555	2.7501	2.31344e-47	3.45898e-44
Papio_anubis_THRB	14.3951	2.46478	5.55215e-47	8.07702e-44
Papio_anubis_ATRNL1	14.1268	2.7191	2.59757e-45	3.67938e-42
Papio_anubis_BCAR3	13.7747	1.15145	3.61924e-43	4.87023e-40
Papio_anubis_TCF4	13.4206	0.771746	4.58144e-41	5.87144e-38
Papio_anubis_CD163L1	13.171	3.21819	1.2889e-39	1.61341e-36
Papio_anubis_MERTK	12.9868	1.5616	1.45459e-38	1.73989e-35
Papio_anubis_DIP2B	12.708	0.807441	5.33915e-37	6.24751e-34
Papio_anubis_PRKN	12.6194	0.974306	1.65104e-36	1.89083e-33
Papio_anubis_MS4A6A	12.5673	1.28199	3.19247e-36	3.57996e-33
Papio_anubis_ITGA9	12.2973	1.35075	9.36139e-35	1.00777e-31
Papio_anubis_AGAP1	11.9977	1.02271	3.65467e-33	3.85718e-30
Papio_anubis_NFIA	11.9266	1.21653	8.59771e-33	8.89962e-30
Papio_anubis_SLC16A10	11.8798	1.98048	1.50718e-32	1.53067e-29
Papio_anubis_ULK2	11.7114	0.882488	1.11395e-31	1.11036e-28
Papio_anubis_TANC1	11.5556	1.37287	6.9137e-31	6.6453e-28
Papio_anubis_GDPD1	11.4968	1.51017	1.36951e-30	1.29325e-27
Papio_anubis_ENSPANG00000017406	11.3144	0.922342	1.1136e-29	9.99007e-27
Papio_anubis_TBC1D14	11.2306	0.800284	2.88496e-29	2.54567e-26
Papio_anubis_APPL2	11.0564	1.0945	2.04073e-28	1.74356e-25
Papio_anubis_RIN2	10.961	0.84216	5.885e-28	4.94947e-25
Papio_anubis_MAN1C1	10.6761	0.828509	1.31662e-26	1.05774e-23
Papio_anubis_C2CD5	10.6646	0.953323	1.49072e-26	1.17999e-23
Papio_anubis_FGD6	10.6508	1.63528	1.72928e-26	1.34899e-23
Papio_anubis_SNX9	10.6352	0.755634	2.04402e-26	1.57174e-23
Papio_anubis_TLE4	10.3731	1.21877	3.28725e-25	2.45749e-22
Papio_anubis_PDE7B	10.2202	1.39162	1.60941e-24	1.18668e-21
Papio_anubis_ARAP2	10.1797	0.79648	2.44215e-24	1.72962e-21
Papio_anubis_IL12RB2	10.0887	1.09108	6.19651e-24	4.3316e-21
Papio_anubis_LYVE1	9.89499	3.77374	4.37648e-23	2.9446e-20
Papio_anubis_NT5DC1	9.76531	0.758297	1.58623e-22	1.04122e-19
Papio_anubis_ASTN2	9.64192	0.923077	5.31849e-22	3.44907e-19
Papio_anubis_KMO	9.47982	1.03108	2.54733e-21	1.59433e-18
Papio_anubis_CD55	9.26982	0.876671	1.86455e-20	1.07639e-17
Papio_anubis_PRKCA	9.26896	0.772294	1.87977e-20	1.07639e-17
Papio_anubis_ATG4C	8.93787	1.1106	3.96756e-19	2.17916e-16
Papio_anubis_DERA	8.90914	0.774527	5.14301e-19	2.79624e-16
Papio_anubis_FUCA1	8.73118	1.64103	2.52019e-18	1.34309e-15
Papio_anubis_SLC7A8	8.61509	2.09329	6.98854e-18	3.68789e-15
Papio_anubis_PPFIBP2	8.56612	1.31795	1.07033e-17	5.5396e-15
Papio_anubis_EHD4	8.50357	1.12531	1.83851e-17	9.42471e-15
Papio_anubis_ZNF704	8.47318	0.99319	2.38785e-17	1.21253e-14
Papio_anubis_PDE4D	8.4025	1.08099	4.37081e-17	2.19872e-14
Papio_anubis_ARHGAP29	8.37423	1.76404	5.55864e-17	2.77036e-14
Papio_anubis_PARVB	8.30405	1.12037	1.0062e-16	4.79288e-14
Papio_anubis_ENSPANG00000044328	8.16394	0.993833	3.24278e-16	1.5047e-13
Papio_anubis_SNX30	8.12238	0.848861	4.57139e-16	2.10308e-13
Papio_anubis_TTC28	8.11497	0.93347	4.85901e-16	2.21645e-13
Papio_anubis_CREB3L2	7.66411	0.819682	1.80074e-14	7.23333e-12
Papio_anubis_EPS8	7.35929	0.895391	1.84894e-13	6.9112e-11
Papio_anubis_ENSPANG00000022563	7.24561	0.961791	4.30508e-13	1.56571e-10
Papio_anubis_SLC40A1	7.18527	2.49084	6.70726e-13	2.39089e-10
Papio_anubis_ENSPANG00000023856	7.16912	0.858436	7.54831e-13	2.65553e-10
Papio_anubis_PLEKHG5	7.0176	2.45391	2.25705e-12	7.68911e-10
Papio_anubis_LOXL3	6.93229	1.2328	4.14092e-12	1.40182e-09
Papio_anubis_P3H2	6.86594	0.789636	6.60562e-12	2.19478e-09
Papio_anubis_SFMBT2	6.85652	1.20194	7.05565e-12	2.32992e-09
Papio_anubis_EDA	6.80261	1.54803	1.02739e-11	3.29169e-09
Papio_anubis_APLF	6.7121	1.57611	1.91844e-11	5.93459e-09
Papio_anubis_AR	6.63605	1.43212	3.2219e-11	9.63456e-09
Papio_anubis_FGFR1	6.33524	2.02464	2.36971e-10	6.31445e-08
Papio_anubis_MGMT	6.30317	0.788337	2.91615e-10	7.61965e-08
Papio_anubis_PGM2L1	6.21083	1.31445	5.27042e-10	1.35088e-07
Papio_anubis_SLC22A23	6.19683	2.27093	5.76119e-10	1.45588e-07
Papio_anubis_PER3	6.17781	1.02206	6.49964e-10	1.63481e-07
Papio_anubis_CPED1	6.16946	1.50368	6.85235e-10	1.71499e-07
Papio_anubis_PITHD1	6.16522	0.919829	7.03837e-10	1.74363e-07
Papio_anubis_CD5L	6.15221	0.921909	7.6409e-10	1.86099e-07
Papio_anubis_ADRB2	6.083	1.62916	1.17956e-09	2.83441e-07
Papio_anubis_MS4A4A	5.93618	0.828477	2.91746e-09	6.68234e-07

## Sheet: Monocytes_papio
Gene	scores	log2FC	pvals	FDR
Papio_anubis_TCF7L2	19.4289	3.51855	4.39844e-84	2.3675e-79
Papio_anubis_RIPOR2	17.4	3.83791	8.25672e-68	2.22213e-63
Papio_anubis_HCK	15.1994	2.90578	3.5675e-52	6.40081e-48
Papio_anubis_LYST	12.4207	1.9152	2.01826e-35	2.17269e-31
Papio_anubis_RAP1GAP2	12.0398	1.99966	2.19471e-33	1.47665e-29
Papio_anubis_LYN	11.8946	1.32874	1.26214e-32	7.54846e-29
Papio_anubis_DOCK5	11.8496	2.74709	2.16094e-32	1.16315e-28
Papio_anubis_ITGA4	11.5721	1.89708	5.70813e-31	2.79315e-27
Papio_anubis_SNTB1	10.8252	2.67409	2.61596e-27	1.00576e-23
Papio_anubis_PAG1	10.5745	2.58759	3.91228e-26	1.40388e-22
Papio_anubis_TNIK	10.0706	2.24826	7.45439e-24	2.30881e-20
Papio_anubis_LDLRAD3	9.81325	2.67123	9.87387e-23	2.79722e-19
Papio_anubis_VCAN	9.36323	2.18222	7.73355e-21	1.89212e-17
Papio_anubis_LTA4H	9.17842	2.92114	4.37447e-20	1.02374e-16
Papio_anubis_DAPK1	8.55306	1.07732	1.1987e-17	2.38968e-14
Papio_anubis_NEDD9	8.39912	2.33052	4.49835e-17	8.34924e-14
Papio_anubis_PITPNC1	8.37022	2.32715	5.75094e-17	1.008e-13
Papio_anubis_NFKBIZ	8.0679	2.6855	7.15169e-16	1.16651e-12
Papio_anubis_PTPRB	7.99506	3.18974	1.29512e-15	1.99175e-12
Papio_anubis_RAP1B	7.94034	1.58541	2.0162e-15	3.01455e-12
Papio_anubis_IKZF1	7.83256	1.38858	4.78055e-15	6.77152e-12
Papio_anubis_BCL2	7.4274	1.13734	1.10752e-13	1.45398e-10
Papio_anubis_MEGF9	7.31074	1.53262	2.65679e-13	3.32568e-10
Papio_anubis_FRY	7.17262	2.76677	7.35738e-13	8.6091e-10
Papio_anubis_USP3	7.08059	1.24537	1.43543e-12	1.60965e-09
Papio_anubis_MAML3	7.02921	0.77305	2.07711e-12	2.23605e-09
Papio_anubis_PILRA	6.99356	1.26515	2.67996e-12	2.77407e-09
Papio_anubis_NFAT5	6.57368	1.11521	4.9088e-11	4.49708e-08
Papio_anubis_PLCB1	6.57305	3.74148	4.92936e-11	4.49708e-08
Papio_anubis_ANKRD33B	6.53872	2.60796	6.20479e-11	5.43971e-08
Papio_anubis_ADAMTS2	6.53699	2.17602	6.27707e-11	5.43971e-08
Papio_anubis_CTBP2	6.37923	1.10127	1.7798e-10	1.45151e-07
Papio_anubis_KYNU	6.28225	0.8338	3.33713e-10	2.56607e-07
Papio_anubis_PTK2B	6.15219	1.13555	7.64189e-10	5.71295e-07
Papio_anubis_IDO1	6.11366	2.00051	9.73741e-10	7.08278e-07
Papio_anubis_PSAP	6.02368	1.16917	1.70496e-09	1.20752e-06
Papio_anubis_WARS1	5.90962	1.35207	3.42899e-09	2.397e-06
Papio_anubis_RIN3	5.88584	1.18124	3.96031e-09	2.69832e-06
Papio_anubis_ENSPANG00000008082	5.84087	2.01898	5.19278e-09	3.4507e-06
Papio_anubis_SASH1	5.7672	1.38074	8.06004e-09	5.16476e-06
Papio_anubis_ST3GAL6	5.68403	1.8726	1.3156e-08	8.33097e-06
Papio_anubis_ADARB2	5.60271	3.73937	2.11023e-08	1.27624e-05
Papio_anubis_GDA	5.59447	2.53674	2.21295e-08	1.32349e-05
Papio_anubis_BMT2	5.57244	1.50201	2.51201e-08	1.46969e-05
Papio_anubis_VCL	5.55519	2.14647	2.77313e-08	1.58794e-05
Papio_anubis_NCOA3	5.45038	0.842884	5.02611e-08	2.70535e-05
Papio_anubis_GPCPD1	5.35828	0.787721	8.40167e-08	4.43361e-05
Papio_anubis_STK10	5.33164	1.68567	9.73277e-08	5.03727e-05
Papio_anubis_PPP1R9A	5.21628	1.89256	1.8255e-07	9.18311e-05
Papio_anubis_CYRIA	5.17317	1.3008	2.30155e-07	0.00011061
Papio_anubis_TLN1	5.10145	1.37407	3.37066e-07	0.000159148
Papio_anubis_TTC7A	5.08249	1.5304	3.72529e-07	0.000174363
Papio_anubis_RNF144B	5.07401	1.15186	3.89511e-07	0.000177676
Papio_anubis_ATP1B3	5.06228	1.80472	4.14275e-07	0.000185823
Papio_anubis_MAP4K4	4.94777	0.930892	7.50689e-07	0.000320687
Papio_anubis_PECAM1	4.80364	1.68701	1.55804e-06	0.000621208
Papio_anubis_CYFIP2	4.78901	3.81411	1.67608e-06	0.000663357
Papio_anubis_SLCO3A1	4.73593	1.51404	2.18051e-06	0.000850495
Papio_anubis_TNFRSF1B	4.69771	0.914737	2.63094e-06	0.000990301
Papio_anubis_FMNL1	4.56524	0.903024	4.98914e-06	0.0017878
Papio_anubis_HIPK3	4.56414	0.836585	5.01539e-06	0.0017878
Papio_anubis_CCDC88C	4.5273	1.97748	5.9742e-06	0.00210175
Papio_anubis_ACTR3	4.44257	0.787335	8.88911e-06	0.00301902
Papio_anubis_ENSPANG00000011002	4.40264	1.59158	1.06939e-05	0.00355316
Papio_anubis_ZFAND6	4.2582	0.952575	2.06077e-05	0.006449
Papio_anubis_KLF12	4.25262	3.18159	2.11281e-05	0.00657366
Papio_anubis_PDE8B	4.22743	3.64984	2.36377e-05	0.00722909
Papio_anubis_PTPN1	4.07492	0.984154	4.60304e-05	0.0133926
Papio_anubis_FYN	4.04101	2.63537	5.32226e-05	0.0150777
Papio_anubis_MAFB	3.98417	1.2964	6.77173e-05	0.0186756
Papio_anubis_SLC11A1	3.98063	1.66284	6.87343e-05	0.0187802
Papio_anubis_MYO1G	3.97182	2.96597	7.1326e-05	0.0193899
Papio_anubis_GPC4	3.86171	4.03731	0.000112595	0.0295636
Papio_anubis_FGR	3.85837	2.755	0.000114145	0.0298251
Papio_anubis_FCN1	3.83741	2.58528	0.000124339	0.0320224
Papio_anubis_ARAP1	3.78867	1.49254	0.000151457	0.0388206
Papio_anubis_NCF1	3.78155	0.758847	0.000155857	0.039759
Papio_anubis_BLNK	-3.71969	-1.77638	0.000199465	0.0494766
Papio_anubis_SCARB1	-3.73306	-1.20095	0.000189171	0.0471404
Papio_anubis_FCHSD2	-3.75063	-1.09118	0.000176391	0.0441602
Papio_anubis_CTSC	-3.77305	-0.935729	0.000161266	0.0407526
Papio_anubis_IPCEF1	-3.77916	-1.15691	0.000157356	0.0399521
Papio_anubis_THSD7A	-3.83793	-1.74215	0.000124078	0.0320224
Papio_anubis_IL12RB2	-3.84603	-2.19892	0.000120045	0.0312153
Papio_anubis_STARD13	-3.86244	-1.47764	0.00011226	0.0295636
Papio_anubis_PALM2AKAP2	-3.87049	-1.30789	0.000108617	0.0288001
Papio_anubis_HPS3	-3.98316	-1.19876	6.80045e-05	0.0186756
Papio_anubis_SH3PXD2A	-4.00326	-1.90786	6.24748e-05	0.0173339
Papio_anubis_ANKS1A	-4.01305	-0.759849	5.99404e-05	0.0167168
Papio_anubis_P3H2	-4.03044	-2.25674	5.56731e-05	0.0156076
Papio_anubis_UBASH3B	-4.03227	-0.914808	5.52416e-05	0.0155677
Papio_anubis_SH3RF3	-4.04694	-2.12265	5.18916e-05	0.0147784
Papio_anubis_TBC1D14	-4.04867	-0.953143	5.1509e-05	0.0147475
Papio_anubis_BMPR2	-4.05618	-0.849978	4.98825e-05	0.0143582
Papio_anubis_EPB41L2	-4.06428	-0.901691	4.81801e-05	0.0139427
Papio_anubis_ENSPANG00000017728	-4.07576	-1.35546	4.58641e-05	0.0133926
Papio_anubis_ESR1	-4.11958	-1.43156	3.79561e-05	0.0112254
Papio_anubis_ATP2C1	-4.14692	-0.815888	3.36979e-05	0.0100768
Papio_anubis_PDGFC	-4.18032	-1.61304	2.91104e-05	0.00875363
Papio_anubis_CREB5	-4.20665	-1.56528	2.59186e-05	0.00788189

## Sheet: MP_GBE1_papio
Gene	scores	log2FC	pvals	FDR
Papio_anubis_PIK3CB	29.2267	2.13894	8.86948e-188	4.77408e-183
Papio_anubis_ENSPANG00000004279	24.8565	3.31569	2.19863e-136	5.91717e-132
Papio_anubis_FAM13A	21.5902	1.68256	2.22004e-103	3.9832e-99
Papio_anubis_P4HA1	21.5397	2.18853	6.6136e-103	8.8996e-99
Papio_anubis_ZNF292	21.2405	1.65367	4.0391e-100	4.34817e-96
Papio_anubis_GBE1	20.8343	2.79233	2.11424e-96	1.89668e-92
Papio_anubis_MXI1	20.6743	3.0624	5.90134e-95	3.97057e-91
Papio_anubis_FAM162A	19.7612	2.52211	6.43193e-87	3.84672e-83
Papio_anubis_SLC2A5	19.7511	2.39751	7.84269e-87	4.22141e-83
Papio_anubis_SLC35F3	18.8448	3.79505	3.2415e-79	1.58615e-75
Papio_anubis_PFKFB3	18.4907	1.33427	2.45492e-76	1.10116e-72
Papio_anubis_ENO2	16.2719	2.08443	1.56241e-59	6.46908e-56
Papio_anubis_TNS1	15.5579	1.61341	1.40594e-54	5.40545e-51
Papio_anubis_AFF1	14.9185	0.900779	2.4998e-50	8.97028e-47
Papio_anubis_IMMP2L	14.8082	1.18138	1.29739e-49	4.3646e-46
Papio_anubis_ERO1A	14.5595	1.53688	5.08451e-48	1.60987e-44
Papio_anubis_ZNF395	14.4695	3.43569	1.88903e-47	5.64884e-44
Papio_anubis_PIK3R1	14.1027	1.05975	3.65752e-45	1.03616e-41
Papio_anubis_KYNU	14.0924	0.997633	4.22746e-45	1.13774e-41
Papio_anubis_CPQ	13.9204	1.3385	4.76487e-44	1.2213e-40
Papio_anubis_EGLN3	13.7816	4.05518	3.28961e-43	8.04848e-40
Papio_anubis_NDRG1	13.2581	4.0448	4.04781e-40	9.47293e-37
Papio_anubis_KCNK13	13.1371	1.22428	2.01705e-39	4.52375e-36
Papio_anubis_SH3BP5	12.9155	1.76064	3.67993e-38	7.6183e-35
Papio_anubis_KDM4C	12.7	0.894119	5.91561e-37	1.09798e-33
Papio_anubis_GPCPD1	12.6484	1.09155	1.14226e-36	1.98333e-33
Papio_anubis_EGLN1	12.2998	1.76032	9.08055e-35	1.5274e-31
Papio_anubis_PAM	12.2511	1.72775	1.65673e-34	2.70227e-31
Papio_anubis_ENO1	11.884	2.25437	1.4329e-32	2.26846e-29
Papio_anubis_LSP1	11.7667	1.78522	5.7939e-32	8.66284e-29
Papio_anubis_ANTXR2	11.742	1.06874	7.75994e-32	1.12888e-28
Papio_anubis_WSB1	11.7215	0.760511	9.88563e-32	1.40027e-28
Papio_anubis_IFNGR2	11.6016	0.80122	4.04328e-31	5.18175e-28
Papio_anubis_KDM3A	11.462	2.16052	2.04812e-30	2.56377e-27
Papio_anubis_PLSCR1	11.3633	1.40913	6.36636e-30	7.61501e-27
Papio_anubis_PHF21A	11.1776	0.931274	5.25088e-29	6.14422e-26
Papio_anubis_NPEPPS	11.1494	1.41628	7.20786e-29	8.25468e-26
Papio_anubis_CHSY1	11.1383	1.84206	8.16928e-29	9.16083e-26
Papio_anubis_ENSPANG00000011695	11.0289	2.54276	2.77374e-28	2.92744e-25
Papio_anubis_VWF	10.9416	2.30515	7.28887e-28	7.54482e-25
Papio_anubis_RLF	10.7498	1.03206	5.93979e-27	5.92065e-24
Papio_anubis_CP	10.6538	1.99295	1.67308e-26	1.63737e-23
Papio_anubis_ABHD18	10.5339	1.49865	6.02692e-26	5.69131e-23
Papio_anubis_ENSPANG00000041103	10.2743	2.63059	9.20298e-25	8.39593e-22
Papio_anubis_HIF1A	10.2667	1.21284	9.95417e-25	8.92989e-22
Papio_anubis_ENSPANG00000023537	10.1556	2.53047	3.12856e-24	2.67299e-21
Papio_anubis_SYTL3	10.075	1.82577	7.12822e-24	5.99506e-21
Papio_anubis_AK4	9.76154	2.64079	1.64643e-22	1.3227e-19
Papio_anubis_NEDD4L	9.51745	1.00885	1.77482e-21	1.38452e-18
Papio_anubis_DARS1	9.48881	1.15974	2.33689e-21	1.79694e-18
Papio_anubis_POT1	9.47937	1.38361	2.55818e-21	1.93939e-18
Papio_anubis_BNIP3	9.2162	3.6091	3.07824e-20	2.23904e-17
Papio_anubis_NCF1	9.11951	0.858918	7.54637e-20	5.41588e-17
Papio_anubis_INSIG2	9.07328	2.81422	1.15482e-19	8.07265e-17
Papio_anubis_ATP13A3	8.89202	1.13965	6.00063e-19	3.89144e-16
Papio_anubis_UBE2R2	8.84353	1.02689	9.27402e-19	5.87275e-16
Papio_anubis_GNA13	8.78584	0.763002	1.55204e-18	9.63631e-16
Papio_anubis_ENSPANG00000023475	8.77648	1.11069	1.68664e-18	1.03165e-15
Papio_anubis_GPATCH2L	8.33369	0.750694	7.83639e-17	4.44002e-14
Papio_anubis_PTEN	8.25637	0.801209	1.50169e-16	8.4198e-14
Papio_anubis_VCAN	8.23256	1.63272	1.83249e-16	1.00648e-13
Papio_anubis_ENSPANG00000039647	7.88492	3.91772	3.1473e-15	1.55419e-12
Papio_anubis_RIOK3	7.8402	1.57753	4.49839e-15	2.18135e-12
Papio_anubis_LDHA	7.80074	1.68417	6.15454e-15	2.9465e-12
Papio_anubis_ABCA1	7.8001	0.848941	6.18575e-15	2.9465e-12
Papio_anubis_OGA	7.69649	0.866898	1.39849e-14	6.43379e-12
Papio_anubis_SGPL1	7.65444	1.08255	1.94161e-14	8.70908e-12
Papio_anubis_SLC38A1	7.55413	1.4472	4.21681e-14	1.86044e-11
Papio_anubis_PKM	7.54121	1.38739	4.65628e-14	2.03763e-11
Papio_anubis_SDC2	7.444	0.876293	9.76801e-14	4.13994e-11
Papio_anubis_FAM20C	7.24253	1.62423	4.40382e-13	1.76896e-10
Papio_anubis_ENSPANG00000039055	7.17392	3.97498	7.28791e-13	2.90577e-10
Papio_anubis_ENSPANG00000041423	7.1296	2.04394	1.00662e-12	3.89799e-10
Papio_anubis_SSH1	7.11439	0.977863	1.12411e-12	4.32188e-10
Papio_anubis_ASAH1	6.99011	1.0626	2.74675e-12	1.04117e-09
Papio_anubis_ACSL1	6.93621	1.1473	4.02753e-12	1.48483e-09
Papio_anubis_ESYT2	6.9168	1.20364	4.61961e-12	1.69153e-09
Papio_anubis_PSAP	6.84667	0.811847	7.55905e-12	2.74915e-09
Papio_anubis_HK2	6.83657	1.88278	8.11142e-12	2.93024e-09
Papio_anubis_KDM5B	6.75024	1.74673	1.47598e-11	5.26134e-09
Papio_anubis_GK5	6.6964	2.2151	2.13618e-11	7.41818e-09
Papio_anubis_PFKFB4	6.56371	2.24872	5.24859e-11	1.76569e-08
Papio_anubis_ANXA1	6.43678	1.01813	1.22038e-10	4.00536e-08
Papio_anubis_GPI	6.38713	2.16214	1.69024e-10	5.44784e-08
Papio_anubis_PDE8A	6.32248	0.7895	2.57402e-10	8.1023e-08
Papio_anubis_DHRS3	6.30046	1.04536	2.96753e-10	9.23298e-08
Papio_anubis_NAMPT	6.27965	1.17806	3.39334e-10	1.04971e-07
Papio_anubis_IPMK	6.16825	0.907588	6.90498e-10	2.09982e-07
Papio_anubis_NQO2	6.06216	0.978815	1.34306e-09	3.97207e-07
Papio_anubis_CLEC5A	5.98588	1.01479	2.15224e-09	6.17254e-07
Papio_anubis_PPME1	5.85325	1.19235	4.82055e-09	1.32383e-06
Papio_anubis_RFTN1	5.60999	0.797112	2.02337e-08	5.16161e-06
Papio_anubis_RNMT	5.5961	0.835006	2.19224e-08	5.53988e-06
Papio_anubis_PITPNA	5.49542	0.757044	3.89792e-08	9.58973e-06
Papio_anubis_ABCB4	5.27645	1.23268	1.31708e-07	3.09577e-05
Papio_anubis_ENSPANG00000048902	5.23044	2.88896	1.69111e-07	3.90668e-05
Papio_anubis_PDK1	5.21783	1.33518	1.81028e-07	4.14638e-05
Papio_anubis_CXCL8	5.19646	2.11438	2.03114e-07	4.59361e-05
Papio_anubis_WARS1	5.15564	0.845305	2.52764e-07	5.66886e-05
Papio_anubis_OXSR1	5.02228	1.0667	5.10614e-07	0.000108634

## Sheet: Prolif_Myeloids_papio
Gene	scores	log2FC	pvals	FDR
Papio_anubis_DIAPH3	15.3421	6.19161	4.00102e-53	2.15359e-48
Papio_anubis_BRCA2	11.4518	3.81765	2.3035e-30	6.1994e-26
Papio_anubis_ATAD2	10.9542	3.15955	6.34172e-28	1.07449e-23
Papio_anubis_EZH2	10.9333	2.79044	7.98494e-28	1.07449e-23
Papio_anubis_SMC4	10.8635	3.0842	1.71983e-27	1.85144e-23
Papio_anubis_TOP2A	9.85943	5.78912	6.24004e-23	5.59794e-19
Papio_anubis_RAD51B	9.47004	1.32221	2.79743e-21	2.15107e-17
Papio_anubis_MKI67	9.40763	7.24193	5.07431e-21	3.41412e-17
Papio_anubis_NSD2	9.36644	2.39983	7.50201e-21	4.4867e-17
Papio_anubis_CIT	8.80785	4.30868	1.27567e-18	6.86642e-15
Papio_anubis_HELLS	8.76987	4.03036	1.78872e-18	8.75268e-15
Papio_anubis_FANCI	8.42986	3.4393	3.46083e-17	1.55236e-13
Papio_anubis_ASPM	8.31297	6.18556	9.33387e-17	3.86465e-13
Papio_anubis_ENSPANG00000019454	8.27398	2.40243	1.29558e-16	4.98114e-13
Papio_anubis_BUB1B	8.21715	5.20377	2.08401e-16	7.06168e-13
Papio_anubis_MELK	8.21628	4.72109	2.09911e-16	7.06168e-13
Papio_anubis_CENPE	8.05932	4.28662	7.67228e-16	2.42922e-12
Papio_anubis_CENPU	7.68702	3.87816	1.50603e-14	4.50354e-11
Papio_anubis_NCAPD3	7.67227	2.52773	1.68985e-14	4.78724e-11
Papio_anubis_POLQ	7.53259	4.79204	4.97438e-14	1.33876e-10
Papio_anubis_MIS18BP1	7.4369	3.56868	1.03078e-13	2.64203e-10
Papio_anubis_CENPF	7.31267	5.23012	2.61883e-13	6.40733e-10
Papio_anubis_SPAG5	7.18927	4.89105	6.51389e-13	1.52442e-09
Papio_anubis_TACC3	7.17651	3.02989	7.15113e-13	1.60382e-09
Papio_anubis_ANLN	7.13385	6.06283	9.75987e-13	2.10134e-09
Papio_anubis_CEP128	6.78587	1.91136	1.15388e-11	2.3888e-08
Papio_anubis_NCAPG	6.76905	6.29014	1.29634e-11	2.58432e-08
Papio_anubis_ZGRF1	6.71997	3.34403	1.81763e-11	3.49413e-08
Papio_anubis_BRIP1	6.59437	5.07744	4.27066e-11	7.92664e-08
Papio_anubis_NAV2	6.46929	3.10845	9.84658e-11	1.76667e-07
Papio_anubis_POLA1	6.39846	1.45612	1.5695e-10	2.72516e-07
Papio_anubis_CDK5RAP2	6.3662	1.83748	1.93771e-10	3.25936e-07
Papio_anubis_CEP192	6.32578	2.44854	2.51964e-10	4.10976e-07
Papio_anubis_MMS22L	6.24962	2.73002	4.11444e-10	6.51364e-07
Papio_anubis_SGO2	6.15092	6.09196	7.70353e-10	1.18472e-06
Papio_anubis_CENPC	6.09518	1.98998	1.09312e-09	1.63439e-06
Papio_anubis_CEP295	6.07365	1.77815	1.25038e-09	1.80968e-06
Papio_anubis_PRKDC	6.06978	1.14153	1.28087e-09	1.80968e-06
Papio_anubis_PRIM2	6.06602	1.58305	1.31122e-09	1.80968e-06
Papio_anubis_PKP4	6.05157	2.94438	1.43441e-09	1.93021e-06
Papio_anubis_PPM1E	6.04093	1.24665	1.5323e-09	1.96968e-06
Papio_anubis_RRM2	6.04044	5.74221	1.53693e-09	1.96968e-06
Papio_anubis_CDCA2	6.01403	5.59017	1.80964e-09	2.26525e-06
Papio_anubis_DTL	5.97081	5.21929	2.36079e-09	2.88799e-06
Papio_anubis_ITGB3BP	5.95716	2.04675	2.56665e-09	3.03767e-06
Papio_anubis_FAF1	5.9553	0.86187	2.59601e-09	3.03767e-06
Papio_anubis_ECT2	5.87682	3.48509	4.18226e-09	4.78966e-06
Papio_anubis_DNMT1	5.86888	1.47413	4.38743e-09	4.91995e-06
Papio_anubis_SMC2	5.82786	3.57021	5.61434e-09	6.16488e-06
Papio_anubis_KIF4A	5.82455	4.46791	5.72667e-09	6.16488e-06
Papio_anubis_CENPP	5.80353	4.71968	6.4933e-09	6.85311e-06
Papio_anubis_POLE	5.79398	4.6445	6.87389e-09	7.11527e-06
Papio_anubis_CKAP5	5.7492	1.54211	8.96664e-09	9.10638e-06
Papio_anubis_UBAP2	5.72915	1.04199	1.00933e-08	1.00608e-05
Papio_anubis_CNTLN	5.67912	0.921695	1.35386e-08	1.32496e-05
Papio_anubis_NUF2	5.63705	5.68844	1.72984e-08	1.66269e-05
Papio_anubis_STIL	5.63123	3.53337	1.78928e-08	1.68964e-05
Papio_anubis_PBX3	5.61796	0.915617	1.93228e-08	1.79322e-05
Papio_anubis_RSRC1	5.54806	0.858186	2.88854e-08	2.60245e-05
Papio_anubis_SPATA5	5.54731	1.13022	2.90096e-08	2.60245e-05
Papio_anubis_ATAD5	5.47989	3.16885	4.25596e-08	3.75543e-05
Papio_anubis_LMNB1	5.45852	4.00161	4.80121e-08	4.16823e-05
Papio_anubis_KIF15	5.4253	5.48559	5.78558e-08	4.94309e-05
Papio_anubis_ENSPANG00000004276	5.38144	3.24467	7.38935e-08	6.19315e-05
Papio_anubis_CHEK1	5.35788	3.58735	8.42036e-08	6.86718e-05
Papio_anubis_FANCA	5.34603	2.77202	8.9902e-08	7.22249e-05
Papio_anubis_PRC1	5.33677	4.24628	9.46188e-08	7.48963e-05
Papio_anubis_CLSPN	5.31215	5.39211	1.08337e-07	8.45124e-05
Papio_anubis_KNTC1	5.28978	3.23839	1.22463e-07	9.28404e-05
Papio_anubis_BRCA1	5.28608	3.81676	1.24963e-07	9.34205e-05
Papio_anubis_SCLT1	5.24372	1.00039	1.57374e-07	0.000116039
Papio_anubis_SUZ12	5.18385	1.51047	2.17353e-07	0.00015599
Papio_anubis_ARHGAP11A	5.10349	5.25658	3.33446e-07	0.000236158
Papio_anubis_CEP112	5.05671	1.00722	4.2656e-07	0.000298182
Papio_anubis_NFIA	4.89722	1.10933	9.72044e-07	0.000662294
Papio_anubis_MND1	4.88831	4.41759	1.01707e-06	0.000684311
Papio_anubis_KIF20B	4.8287	3.28914	1.37425e-06	0.000913214
Papio_anubis_PHACTR4	4.7488	0.888644	2.04628e-06	0.00134321
Papio_anubis_RRM1	4.73249	2.08722	2.21779e-06	0.00143825
Papio_anubis_CENPK	4.7226	2.66361	2.32847e-06	0.00149205
Papio_anubis_TFDP1	4.62449	2.32665	3.75523e-06	0.00235034
Papio_anubis_TPX2	4.53253	3.94228	5.82823e-06	0.00356489
Papio_anubis_CMSS1	4.47209	1.49898	7.74592e-06	0.00466082
Papio_anubis_BLM	4.47079	0.914193	7.79315e-06	0.00466082
Papio_anubis_TTK	4.3815	5.12578	1.17865e-05	0.00689585
Papio_anubis_ENSPANG00000032981	4.35053	2.09573	1.35811e-05	0.0078604
Papio_anubis_KIF14	4.32243	5.3126	1.54323e-05	0.00883678
Papio_anubis_FAM111B	4.29666	5.24804	1.7339e-05	0.00982407
Papio_anubis_CCDC18	4.2513	2.75725	2.12529e-05	0.0117934
Papio_anubis_GTSE1	4.22898	3.95533	2.34748e-05	0.0127644
Papio_anubis_NFIC	4.22896	1.10098	2.3477e-05	0.0127644
Papio_anubis_ENSPANG00000043100	4.19235	1.71443	2.76085e-05	0.0148605
Papio_anubis_TICRR	4.18454	6.11378	2.85749e-05	0.0150792
Papio_anubis_BARD1	4.17605	3.28701	2.96615e-05	0.0155006
Papio_anubis_ANP32B	4.17091	1.93685	3.03381e-05	0.0157017
Papio_anubis_NCAPD2	4.15743	2.90187	3.21849e-05	0.0164989
Papio_anubis_VRK1	4.14803	1.89988	3.35342e-05	0.0170284
Papio_anubis_FANCC	4.10869	0.773962	3.9791e-05	0.0200167
Papio_anubis_NUCKS1	4.09483	1.33408	4.22488e-05	0.0208955
Papio_anubis_DEPDC5	4.09447	1.08309	4.23143e-05	0.0208955

## Sheet: Unclassified_papio
\	scores	log2FC	pvals	FDR
Papio_anubis_RIPOR2	6.5895	2.01999	4.41294e-11	1.18765e-06
Papio_anubis_TSPAN5	6.47117	4.21301	9.72436e-11	1.74474e-06
Papio_anubis_CBLB	6.3706	1.5144	1.88296e-10	2.5338e-06
Papio_anubis_UTRN	6.22454	1.15533	4.82958e-10	5.19914e-06
Papio_anubis_MYO1D	6.13448	2.67286	8.54405e-10	6.80838e-06
Papio_anubis_PDZRN3	6.1288	4.802	8.85421e-10	6.80838e-06
Papio_anubis_CCND3	6.04719	2.09229	1.4739e-09	8.81489e-06
Papio_anubis_TNIK	5.93064	1.67247	3.01757e-09	1.62424e-05
Papio_anubis_MSI2	5.91012	1.85996	3.41867e-09	1.67285e-05
Papio_anubis_ETS1	5.87857	3.77993	4.13832e-09	1.85624e-05
Papio_anubis_CD247	5.79319	4.91286	6.90635e-09	2.85955e-05
Papio_anubis_AKT3	5.53026	1.41556	3.19755e-08	0.000122936
Papio_anubis_PRKCA	5.50842	1.25021	3.62069e-08	0.000129925
Papio_anubis_SKAP1	5.45249	4.41035	4.96685e-08	0.000163297
Papio_anubis_INPP4B	5.4458	3.41748	5.15745e-08	0.000163297
Papio_anubis_AHI1	5.41934	2.00075	5.98208e-08	0.000178884
Papio_anubis_APBB2	5.325	3.03317	1.00955e-07	0.0002717
Papio_anubis_PRKCH	5.20607	2.43609	1.92882e-07	0.000494384
Papio_anubis_DIP2C	4.90305	2.1205	9.43579e-07	0.00211621
Papio_anubis_PITPNC1	4.81762	1.54097	1.45283e-06	0.00289629
Papio_anubis_STK39	4.68172	3.76295	2.84481e-06	0.00510417
Papio_anubis_FYN	4.67372	2.65189	2.95798e-06	0.00513601
Papio_anubis_ZFPM2	4.6421	5.54598	3.44889e-06	0.00553526
Papio_anubis_TXK	4.63927	3.84026	3.49643e-06	0.00553526
Papio_anubis_BACH2	4.56482	3.95839	4.99934e-06	0.00768841
Papio_anubis_MLLT3	4.40757	2.74343	1.04535e-05	0.0148071
Papio_anubis_ABTB3	4.33936	3.17639	1.42898e-05	0.0192291
Papio_anubis_VCL	4.14047	1.7605	3.46588e-05	0.0433848
Papio_anubis_SPTBN1	4.11152	3.98328	3.93064e-05	0.0459936
Papio_anubis_RBMS3	4.09889	4.22505	4.15143e-05	0.0475436
Papio_anubis_MS4A7	-4.1145	-1.24761	3.88018e-05	0.0459936
Papio_anubis_KCNMA1	-4.11734	-0.845717	3.83264e-05	0.0459936
Papio_anubis_FMNL2	-4.39543	-0.873167	1.10556e-05	0.0152584
Papio_anubis_LYN	-4.45302	-0.80574	8.46721e-06	0.0126599
Papio_anubis_SLC9A9	-4.80816	-0.833011	1.52326e-06	0.00292825
Papio_anubis_MARCHF1	-4.82839	-0.970056	1.3764e-06	0.00284946
Papio_anubis_MSR1	-5.0094	-1.56419	5.45991e-07	0.00127776
Papio_anubis_CMIP	-5.07777	-0.818414	3.81892e-07	0.000934352
Papio_anubis_MEF2C	-5.40465	-0.923355	6.49349e-08	0.000183957
Papio_anubis_SLC8A1	-6.09432	-0.911187	1.09906e-09	7.39478e-06
Papio_anubis_DOCK4	-6.62356	-1.21211	3.50641e-11	1.18765e-06

## Sheet: Mreg_DC_papio
Gene	scores	log2FC	pvals	FDR
Papio_anubis_LY75	8.63431	3.93634	5.9083e-18	3.1802e-13
Papio_anubis_USP12	8.42126	3.6634	3.72451e-17	1.00238e-12
Papio_anubis_PLCL1	7.49763	3.55196	6.49814e-14	1.1659e-09
Papio_anubis_KDM2B	7.27954	3.31092	3.34956e-13	4.50733e-09
Papio_anubis_TMEM131L	7.03377	2.65719	2.01021e-12	2.16403e-08
Papio_anubis_BIRC3	6.83875	3.69707	7.98893e-12	7.16687e-08
Papio_anubis_CD83	6.68284	2.61325	2.3435e-11	1.68461e-07
Papio_anubis_SLC22A23	6.67284	4.7606	2.50893e-11	1.68461e-07
Papio_anubis_FLT3	6.65585	4.40562	2.81676e-11	1.68461e-07
Papio_anubis_ARHGAP22	6.57217	3.85354	4.95868e-11	2.66906e-07
Papio_anubis_CFLAR	6.44122	1.83297	1.18514e-10	5.79921e-07
Papio_anubis_NUB1	6.39138	3.44593	1.64399e-10	7.37411e-07
Papio_anubis_SLCO5A1	5.98458	7.96097	2.16951e-09	8.98277e-06
Papio_anubis_EPSTI1	5.67943	1.54341	1.35143e-08	5.19586e-05
Papio_anubis_PHF19	5.63158	3.76672	1.78561e-08	6.4075e-05
Papio_anubis_REL	5.55461	2.15055	2.78229e-08	9.35999e-05
Papio_anubis_ANKRD33B	5.46438	3.57591	4.64515e-08	0.000147076
Papio_anubis_CERS6	5.44898	2.33731	5.0659e-08	0.000151487
Papio_anubis_TBC1D4	5.40505	2.04524	6.47907e-08	0.000183549
Papio_anubis_SAMSN1	5.31903	2.96939	1.04319e-07	0.000280755
Papio_anubis_UVRAG	5.27429	1.60496	1.33269e-07	0.000341587
Papio_anubis_ANKRD44	5.14728	1.13507	2.64288e-07	0.000618644
Papio_anubis_ZEB1	5.14724	4.95061	2.64348e-07	0.000618644
Papio_anubis_GRK3	5.03808	1.52881	4.70231e-07	0.00101243
Papio_anubis_NFKB1	4.98902	2.22459	6.06872e-07	0.00125637
Papio_anubis_HIPK3	4.97368	1.87681	6.56944e-07	0.00126288
Papio_anubis_PLXNC1	4.93685	1.7261	7.9394e-07	0.00147361
Papio_anubis_HMGN3	4.88594	2.94397	1.02936e-06	0.00178731
Papio_anubis_NTNG1	4.82363	5.71597	1.40972e-06	0.00237123
Papio_anubis_LRRK1	4.77946	1.92956	1.75767e-06	0.00286693
Papio_anubis_FNBP1	4.7287	1.00959	2.25965e-06	0.00357729
Papio_anubis_TANK	4.70291	1.43364	2.56477e-06	0.00394433
Papio_anubis_ENOX1	4.69419	6.41627	2.67666e-06	0.00400206
Papio_anubis_SULF2	4.62617	2.99584	3.72484e-06	0.00519922
Papio_anubis_RABGAP1L	4.62383	1.07107	3.76713e-06	0.00519922
Papio_anubis_RALA	4.52705	2.80306	5.98119e-06	0.00770413
Papio_anubis_AFDN	4.51614	2.79966	6.29773e-06	0.00770413
Papio_anubis_MAP3K14	4.45174	1.84572	8.51773e-06	0.0101883
Papio_anubis_CCDC50	4.37734	2.34717	1.20136e-05	0.0140574
Papio_anubis_LAMP3	4.33071	7.46932	1.48632e-05	0.0168257
Papio_anubis_HIVEP1	4.32862	2.72109	1.50045e-05	0.0168257
Papio_anubis_NRIP1	4.26431	1.60029	2.00523e-05	0.0220273
Papio_anubis_LRRFIP2	4.2124	1.83014	2.52675e-05	0.027201
Papio_anubis_L3MBTL4	4.15185	3.36915	3.29801e-05	0.0341382
Papio_anubis_STK4	4.12951	1.64295	3.63538e-05	0.0359949
Papio_anubis_RFTN1	4.12683	1.77032	3.678e-05	0.0359949
Papio_anubis_DST	4.11872	1.64769	3.80978e-05	0.0366187
Papio_anubis_PRKCA	4.04362	1.66599	5.26316e-05	0.0480161
Papio_anubis_DOCK4	-4.03752	-1.0791	5.402e-05	0.0484614
Papio_anubis_MEF2C	-4.04449	-1.0977	5.24361e-05	0.0480161
Papio_anubis_MRC1	-4.05752	-2.50969	4.95976e-05	0.0468358
Papio_anubis_SLC8A1	-4.14685	-0.982038	3.37083e-05	0.0342336
Papio_anubis_MYOF	-4.19818	-1.85584	2.69063e-05	0.0283972
Papio_anubis_DPYD	-4.51767	-0.914654	6.25236e-06	0.00770413
Papio_anubis_MAML3	-4.51933	-1.40654	6.20355e-06	0.00770413
Papio_anubis_QKI	-4.55001	-1.06902	5.36437e-06	0.00721856
Papio_anubis_FRMD4B	-4.66585	-1.3846	3.07342e-06	0.00447109
Papio_anubis_RBPJ	-4.92798	-1.59784	8.30843e-07	0.0014907
Papio_anubis_OSBPL9	-4.97959	-1.61024	6.37183e-07	0.00126288
Papio_anubis_RNF149	-5.04852	-1.93215	4.45238e-07	0.000998558

## Sheet: MP_NFkB_papio
Gene	scores	log2FC	pvals	FDR
Papio_anubis_NR4A3	6.97102	5.82406	3.14641e-12	1.69359e-07
Papio_anubis_CD86	6.79181	2.5474	1.10736e-11	2.98024e-07
Papio_anubis_CD83	5.71735	2.57198	1.082e-08	0.000194132
Papio_anubis_RASGEF1B	5.08961	2.23705	3.58794e-07	0.00482811
Papio_anubis_NFKBID	4.89968	3.3881	9.59933e-07	0.0100835
Papio_anubis_ENSPANG00000000424	4.86858	1.99053	1.12402e-06	0.0100835
Papio_anubis_ATP13A3	4.83582	2.06556	1.32597e-06	0.010196

## Sheet: MP_TREM2_papio
Gene	scores	log2FC	pvals	FDR
Papio_anubis_MSR1	15.7761	1.25008	4.5412e-56	2.44435e-51
Papio_anubis_MITF	13.1189	0.969399	2.56484e-39	6.90275e-35
Papio_anubis_FMN1	12.516	1.1153	6.10369e-36	1.09512e-31
Papio_anubis_ALCAM	11.3248	1.14542	9.88638e-30	1.33036e-25
Papio_anubis_PLXDC2	11.2724	0.810847	1.79658e-29	1.93406e-25
Papio_anubis_CDK6	10.5888	1.34101	3.35899e-26	3.01335e-22
Papio_anubis_ARHGAP10	10.2677	1.00675	9.84976e-25	7.5739e-21
Papio_anubis_CLIC4	9.47629	1.54023	2.63483e-21	1.57581e-17
Papio_anubis_ENSPANG00000017633	9.35967	1.09025	7.99846e-21	4.30525e-17
Papio_anubis_SYNE1	9.01828	1.302	1.91069e-19	8.57038e-16
Papio_anubis_GPAT3	8.97104	2.44426	2.93731e-19	1.12931e-15
Papio_anubis_PPARG	8.84135	2.02762	9.45658e-19	3.19231e-15
Papio_anubis_BCL2	8.84097	0.794142	9.48928e-19	3.19231e-15
Papio_anubis_SDC2	8.82437	1.05624	1.10083e-18	3.48548e-15
Papio_anubis_KIF1B	8.73645	0.838464	2.40553e-18	6.47401e-15
Papio_anubis_ABCC5	8.54155	0.822925	1.32433e-17	3.21468e-14
Papio_anubis_NCAM1	8.53733	1.21093	1.37364e-17	3.21468e-14
Papio_anubis_RTN4	8.20205	0.874973	2.36323e-16	5.30013e-13
Papio_anubis_DOP1B	8.17684	1.22593	2.91393e-16	6.27381e-13
Papio_anubis_FNIP2	7.85961	1.07902	3.85345e-15	7.97754e-12
Papio_anubis_LHFPL2	7.85026	0.934922	4.15177e-15	8.27678e-12
Papio_anubis_TNS1	7.75412	0.835287	8.8959e-15	1.5961e-11
Papio_anubis_HIP1	7.43167	0.775026	1.07233e-13	1.80373e-10
Papio_anubis_BCL2L1	7.33776	0.794681	2.17194e-13	3.43844e-10
Papio_anubis_CREB5	7.33221	0.966672	2.26391e-13	3.48163e-10
Papio_anubis_FN1	7.28073	1.70566	3.32029e-13	4.83021e-10
Papio_anubis_GLIS3	7.22494	1.88255	5.01317e-13	7.10103e-10
Papio_anubis_OSBPL3	7.12554	1.52865	1.03675e-12	1.43088e-09
Papio_anubis_STARD9	6.93431	1.65066	4.08203e-12	4.7765e-09
Papio_anubis_TGFBR1	6.72785	0.900072	1.72183e-11	1.89465e-08
Papio_anubis_SPP1	6.72761	3.2171	1.72478e-11	1.89465e-08
Papio_anubis_OSBPL8	6.32207	1.25991	2.58088e-10	2.43717e-07
Papio_anubis_IL12RB2	6.25934	0.986758	3.86612e-10	3.56268e-07
Papio_anubis_EEPD1	6.25777	1.19435	3.90514e-10	3.56268e-07
Papio_anubis_CLEC5A	6.14498	1.0309	7.99727e-10	7.05674e-07
Papio_anubis_CADM1	5.96813	0.905558	2.3999e-09	1.95723e-06
Papio_anubis_GK	5.7145	0.874459	1.10025e-08	8.46032e-06
Papio_anubis_CYTIP	5.70274	1.12462	1.17896e-08	8.81368e-06
Papio_anubis_ITGAX	5.69902	0.791647	1.20497e-08	8.88478e-06
Papio_anubis_SLC23A2	5.66713	0.899234	1.45207e-08	1.05621e-05
Papio_anubis_SQSTM1	5.58913	1.26012	2.28216e-08	1.63786e-05
Papio_anubis_PRR5L	5.22755	1.06754	1.71776e-07	0.000107833
Papio_anubis_ENSPANG00000040050	5.14772	1.53172	2.63668e-07	0.000157691
Papio_anubis_DGKH	5.08949	0.999228	3.59033e-07	0.000212366
Papio_anubis_DAAM1	5.0435	1.50244	4.57094e-07	0.000264554
Papio_anubis_GPNMB	4.96545	2.0336	6.85415e-07	0.000384303
Papio_anubis_FAM107B	4.95065	0.983385	7.39652e-07	0.000410438
Papio_anubis_NEK6	4.8422	0.798781	1.2841e-06	0.000698162
Papio_anubis_MGLL	4.78755	1.28103	1.68832e-06	0.000865479
Papio_anubis_SDCBP	4.69639	0.929642	2.64798e-06	0.00130762
Papio_anubis_ENSPANG00000045263	4.65589	1.87919	3.2258e-06	0.00153656
Papio_anubis_TXNRD1	4.58577	0.857374	4.52312e-06	0.00208087
Papio_anubis_NSMAF	4.5662	1.16144	4.9664e-06	0.00226543
Papio_anubis_GSN	4.52397	0.961191	6.06901e-06	0.00272225
Papio_anubis_NCKAP5L	4.49755	1.03832	6.87419e-06	0.00303287
Papio_anubis_FAM20C	4.48886	1.05217	7.16053e-06	0.00310825
Papio_anubis_CD109	4.43743	2.5762	9.10413e-06	0.00392031
Papio_anubis_TULP4	4.29308	0.801538	1.76213e-05	0.0071855
Papio_anubis_SGK1	4.26496	1.72424	1.99935e-05	0.00803113
Papio_anubis_SRGAP1	4.2357	1.13903	2.27838e-05	0.00901735
Papio_anubis_PALLD	4.16936	1.81756	3.05461e-05	0.0117441
Papio_anubis_ITGAV	4.12152	0.860991	3.76385e-05	0.014069
Papio_anubis_STX3	4.10293	0.787111	4.07946e-05	0.0148366
Papio_anubis_LGALS3	4.09582	1.68102	4.2067e-05	0.0151966
Papio_anubis_ENSPANG00000016252	4.0362	0.822055	5.43239e-05	0.0187363
Papio_anubis_PRKCH	4.00774	1.04055	6.13038e-05	0.0206234
Papio_anubis_ANKH	3.9934	0.88322	6.51328e-05	0.021641
Papio_anubis_ZC3H12C	3.80995	1.48955	0.000138996	0.0427521
Papio_anubis_ENSPANG00000036462	3.80324	0.917272	0.000142818	0.043678
Papio_anubis_LIMK1	3.76741	1.12176	0.000164952	0.0488861
Papio_anubis_CYBB	-3.79679	-0.961758	0.000146584	0.0445765
Papio_anubis_JAML	-4.00454	-1.38323	6.21391e-05	0.0207745
Papio_anubis_PLD1	-4.05751	-0.94652	4.95977e-05	0.0173967
Papio_anubis_ENSPANG00000023475	-5.03198	-1.09949	4.8545e-07	0.000276973
Papio_anubis_CD5L	-5.1544	-2.05495	2.54447e-07	0.000153886
Papio_anubis_RPS6KA5	-5.29176	-0.810986	1.21144e-07	7.85626e-05
Papio_anubis_GBP3	-5.41429	-0.890898	6.15324e-08	4.08894e-05
Papio_anubis_MS4A6A	-5.79971	-1.31034	6.64308e-09	5.25839e-06
Papio_anubis_AIM2	-6.65242	-0.785698	2.88318e-11	3.04294e-08
Papio_anubis_ENSPANG00000004762	-6.77088	-1.32783	1.28006e-11	1.46596e-08
Papio_anubis_LDB2	-7.06714	-0.959379	1.58164e-12	2.02698e-09
Papio_anubis_MRC1	-7.41576	-0.896026	1.20932e-13	1.97251e-10
Papio_anubis_F13A1	-7.83343	-1.21384	4.74755e-15	9.1265e-12

[truncated: 2 more sheets: MP_LYVE1lo_papio, MP_groundstate_papio]
