# Supplementary material for: Integrated Molecular Profiling of Preclinical and Clinical Cardiac Xenotransplants
Source: Research Square preprint supplement (doi:10.21203/rs.3.rs-8406985/v1), 2026-02-04
Supplement: Supplementary file 47 [file f17ccc446fb14d9c34522282.xlsx]

## Sheet: CM
Gene	scores	log2FC	pvals	FDR
Sus_scrofa___TTN	121.336	7.26828	0	0
Sus_scrofa___MLIP	120.887	9.26721	0	0
Sus_scrofa___RYR2	120.504	8.65346	0	0
Sus_scrofa___NEBL	120.085	7.30185	0	0
Sus_scrofa___FHOD3	119.582	8.62099	0	0
Sus_scrofa___ABLIM1	119.384	5.56396	0	0
Sus_scrofa___PDLIM5	119.156	5.68043	0	0
Sus_scrofa___DMD	118.675	5.40521	0	0
Sus_scrofa___CDH2	118.289	8.46866	0	0
Sus_scrofa___SORBS1	118.21	5.54948	0	0
Sus_scrofa___PDE4DIP	118.008	7.69462	0	0
Sus_scrofa___CTNNA3	117.877	8.15127	0	0
Sus_scrofa___ACTN2	117.788	9.32054	0	0
Sus_scrofa___PCDH7	117.701	7.88029	0	0
Sus_scrofa___SLC8A1	116.508	5.61292	0	0
Sus_scrofa___ENSSSCG00000010212	115.835	6.71117	0	0
Sus_scrofa___MYOZ2	115.66	9.5183	0	0
Sus_scrofa___SORBS2	114.575	5.55188	0	0
Sus_scrofa___RCAN2	114.435	6.69518	0	0
Sus_scrofa___CACNB2	113.757	5.49911	0	0
Sus_scrofa___PPP1R12B	112.539	5.87208	0	0
Sus_scrofa___MYH7	112.261	8.77892	0	0
Sus_scrofa___NEXN	111.69	7.01625	0	0
Sus_scrofa___MYBPC3	111.334	9.25658	0	0
Sus_scrofa___PPM1E	110.729	8.25165	0	0
Sus_scrofa___CAMK2D	109.213	3.3522	0	0
Sus_scrofa___TNNT2	109.176	8.27798	0	0
Sus_scrofa___ENSSSCG00000040109	109.066	9.22257	0	0
Sus_scrofa___PDE3A	108.441	3.91369	0	0
Sus_scrofa___ENSSSCG00000010626	108.204	9.41921	0	0
Sus_scrofa___ATP2A2	107.793	5.05556	0	0
Sus_scrofa___LARGE1	107.642	3.98817	0	0
Sus_scrofa___CDH13	107.404	4.51285	0	0
Sus_scrofa___TBC1D8	106.874	6.63138	0	0
Sus_scrofa___TMEM164	106.859	6.75399	0	0
Sus_scrofa___PPARGC1A	106.714	9.42411	0	0
Sus_scrofa___ENSSSCG00000027725	106.07	4.83836	0	0
Sus_scrofa___MYO18B	105.435	9.00542	0	0
Sus_scrofa___GRK5	105.137	4.13984	0	0
Sus_scrofa___LRRC2	104.876	8.70269	0	0
Sus_scrofa___ASPDH	104.657	7.43628	0	0
Sus_scrofa___IGF1R	104.176	3.30972	0	0
Sus_scrofa___SGCD	104.037	6.97472	0	0
Sus_scrofa___CCDC141	103.814	4.19923	0	0
Sus_scrofa___INPP4B	103.761	4.16248	0	0
Sus_scrofa___FHL2	103.374	7.07778	0	0
Sus_scrofa___MSRB3	103.326	4.00807	0	0
Sus_scrofa___MYOM1	102.699	7.42683	0	0
Sus_scrofa___TECRL	102.153	9.38973	0	0
Sus_scrofa___PDE4D	101.77	3.60636	0	0
Sus_scrofa___NRAP	101.495	8.5166	0	0
Sus_scrofa___AKAP6	100.998	4.48912	0	0
Sus_scrofa___TRDN	100.765	10.0845	0	0
Sus_scrofa___TACC2	100.649	5.66904	0	0
Sus_scrofa___FBXW7	100.442	3.80834	0	0
Sus_scrofa___OBSCN	99.709	8.57882	0	0
Sus_scrofa___NCEH1	99.2013	6.20157	0	0
Sus_scrofa___TCAP	99.0956	8.44839	0	0
Sus_scrofa___MSI2	98.9524	3.7634	0	0
Sus_scrofa___FILIP1	98.4864	4.01992	0	0
Sus_scrofa___SOX6	97.9284	4.18901	0	0
Sus_scrofa___TSPAN12	97.2142	5.96206	0	0
Sus_scrofa___HIPK2	96.6903	4.00696	0	0
Sus_scrofa___ACSS3	96.4578	4.04827	0	0
Sus_scrofa___CASQ2	96.4551	8.93289	0	0
Sus_scrofa___ENSSSCG00000036052	95.8512	9.14992	0	0
Sus_scrofa___MYOCD	95.6024	6.29546	0	0
Sus_scrofa___PKP2	95.071	9.03003	0	0
Sus_scrofa___SLC25A4	94.3839	8.52748	0	0
Sus_scrofa___PRKAA2	94.106	6.72554	0	0
Sus_scrofa___LMO7	94.0852	4.93523	0	0
Sus_scrofa___DENND5B	94.0492	4.34373	0	0
Sus_scrofa___EFNA5	93.9179	3.87213	0	0
Sus_scrofa___THSD4	93.8617	4.14437	0	0
Sus_scrofa___PDE7A	93.3301	6.81433	0	0
Sus_scrofa___PYGB	93.0589	9.23214	0	0
Sus_scrofa___USP13	92.9745	7.28563	0	0
Sus_scrofa___CLIC5	92.8801	4.06874	0	0
Sus_scrofa___ROR1	92.8143	3.43266	0	0
Sus_scrofa___SAMD4A	92.7147	2.96232	0	0
Sus_scrofa___ENSSSCG00000009338	92.0264	3.44698	0	0
Sus_scrofa___ENSSSCG00000038455	91.9022	9.77263	0	0
Sus_scrofa___RETREG1	91.8727	5.16834	0	0
Sus_scrofa___ESRRG	91.4922	7.85376	0	0
Sus_scrofa___SYNPO2	91.1423	3.95237	0	0
Sus_scrofa___USP24	91.0505	3.12226	0	0
Sus_scrofa___MAP3K5	90.0726	3.37152	0	0
Sus_scrofa___CRYBG3	89.9995	3.84755	0	0
Sus_scrofa___SLC20A2	89.987	4.30841	0	0
Sus_scrofa___PIP5K1B	89.9042	6.30072	0	0
Sus_scrofa___LRRFIP2	89.561	3.70988	0	0
Sus_scrofa___PTPN4	89.5438	4.50463	0	0
Sus_scrofa___ATP1A1	89.3827	5.64017	0	0
Sus_scrofa___GRAMD2B	89.0395	5.31856	0	0
Sus_scrofa___TANC1	88.4382	3.19954	0	0
Sus_scrofa___TXLNB	88.266	8.84237	0	0
Sus_scrofa___PTGER3	88.2303	8.53036	0	0
Sus_scrofa___INSR	87.8537	3.95742	0	0
Sus_scrofa___PHLDB2	87.6486	3.51176	0	0
Sus_scrofa___TPM2	87.3635	6.59138	0	0

## Sheet: Vasc_EC
Gene	scores	log2FC	pvals	FDR
Sus_scrofa___PTPRM	58.5591	3.4642	0	0
Sus_scrofa___MAGI1	56.2551	4.12414	0	0
Sus_scrofa___DOCK9	55.9721	4.52138	0	0
Sus_scrofa___ENSSSCG00000005095	55.2567	7.33136	0	0
Sus_scrofa___MECOM	54.4936	4.47272	0	0
Sus_scrofa___TCF4	52.8631	3.64655	0	0
Sus_scrofa___ABLIM3	52.6673	6.58757	0	0
Sus_scrofa___PECAM1	51.8878	5.27915	0	0
Sus_scrofa___PHACTR2	51.0411	3.9062	0	0
Sus_scrofa___KIT	50.9764	6.3669	0	0
Sus_scrofa___PLCB4	50.8744	3.68521	0	0
Sus_scrofa___ADGRF5	50.5543	5.93123	0	0
Sus_scrofa___PTPRB	50.1748	8.3842	0	0
Sus_scrofa___DOCK4	49.0123	4.16071	0	0
Sus_scrofa___PREX2	48.6516	4.7499	0	0
Sus_scrofa___CCDC85A	48.6106	4.08514	0	0
Sus_scrofa___MCC	48.5997	3.64281	0	0
Sus_scrofa___EPB41L4A	48.5357	5.86152	0	0
Sus_scrofa___ARL15	47.8076	3.8608	0	0
Sus_scrofa___PLEKHG1	47.1871	3.98168	0	0
Sus_scrofa___RASAL2	46.7896	3.38734	0	0
Sus_scrofa___ASAP1	46.2651	3.04433	0	0
Sus_scrofa___CALCRL	46.0926	4.77602	0	0
Sus_scrofa___FLT1	46.0752	5.90708	0	0
Sus_scrofa___FLI1	46.0321	4.32496	0	0
Sus_scrofa___EPAS1	45.8642	5.20887	0	0
Sus_scrofa___ARHGAP29	45.7012	4.399	0	0
Sus_scrofa___ST6GALNAC3	45.6096	7.14044	0	0
Sus_scrofa___APBB2	45.4166	2.97036	0	0
Sus_scrofa___MYO10	45.1934	4.98567	0	0
Sus_scrofa___EMCN	44.8569	7.71387	0	0
Sus_scrofa___ETS1	44.7547	4.57037	0	0
Sus_scrofa___ADGRL4	44.6666	9.49179	0	0
Sus_scrofa___RIN2	44.5125	3.14035	0	0
Sus_scrofa___MYO1E	44.3429	3.25345	0	0
Sus_scrofa___PCDH17	43.9629	8.6656	0	0
Sus_scrofa___ENSSSCG00000001229	43.9436	3.54492	0	0
Sus_scrofa___NCOA3	43.8492	3.58275	0	0
Sus_scrofa___NOL11	43.7251	3.14964	0	0
Sus_scrofa___LRMDA	43.6431	2.91582	0	0
Sus_scrofa___KITLG	43.4246	5.45407	0	0
Sus_scrofa___KIAA1217	43.248	3.21804	0	0
Sus_scrofa___PPP3CA	43.151	2.99783	0	0
Sus_scrofa___CCSER1	43.148	5.0788	0	0
Sus_scrofa___DNM3	43.0083	5.33318	0	0
Sus_scrofa___PALM2AKAP2	42.943	2.45681	0	0
Sus_scrofa___CDC42BPA	42.9098	2.45462	0	0
Sus_scrofa___CMIP	42.842	3.77919	0	0
Sus_scrofa___PRKD1	42.6064	3.55629	0	0
Sus_scrofa___LDB2	42.4854	3.96091	0	0
Sus_scrofa___DGKH	42.4516	2.58316	0	0
Sus_scrofa___UTRN	42.448	2.2905	0	0
Sus_scrofa___FGF12	42.4152	5.85638	0	0
Sus_scrofa___ENSSSCG00000009633	42.3953	3.75001	0	0
Sus_scrofa___ITGA6	42.2178	6.84849	0	0
Sus_scrofa___CYYR1	41.9925	7.1649	0	0
Sus_scrofa___FRYL	41.738	2.76906	0	0
Sus_scrofa___ENSSSCG00000015645	41.5407	3.12797	0	0
Sus_scrofa___AKT3	41.4109	2.7453	0	0
Sus_scrofa___ENSSSCG00000012362	41.1881	5.74174	0	0
Sus_scrofa___ARHGAP31	40.996	3.7433	0	0
Sus_scrofa___CDK17	40.9697	3.72514	0	0
Sus_scrofa___FABP5	40.7679	8.64732	0	0
Sus_scrofa___ERG	40.6429	4.757	0	0
Sus_scrofa___GALNT18	40.6148	4.87627	0	0
Sus_scrofa___ENSSSCG00000033385	40.3935	7.40115	0	0
Sus_scrofa___ADAM10	40.2978	3.54099	0	0
Sus_scrofa___APP	39.609	2.31947	0	0
Sus_scrofa___NRP1	39.4352	2.67117	0	0
Sus_scrofa___CARMIL1	39.1281	3.45879	0	0
Sus_scrofa___PLXNA2	39.0876	3.49925	0	0
Sus_scrofa___S1PR1	38.4901	7.52022	0	0
Sus_scrofa___DISC1	37.8668	3.31239	0	0
Sus_scrofa___FGD5	37.3419	3.69921	3.43487e-305	1.63022e-302
Sus_scrofa___PLCB1	36.9944	2.82607	1.40677e-299	6.50766e-297
Sus_scrofa___ENSSSCG00000016548	36.8137	6.93031	1.11571e-296	5.03379e-294
Sus_scrofa___ASAP2	36.7278	3.43972	2.62994e-295	1.17209e-292
Sus_scrofa___CNKSR3	36.6791	3.87433	1.5702e-294	6.9136e-292
Sus_scrofa___PDGFD	36.4966	3.27299	1.25628e-291	5.46554e-289
Sus_scrofa___MAST4	36.4802	1.95739	2.28804e-291	9.83724e-289
Sus_scrofa___VWF	36.4348	4.32377	1.19671e-290	5.08534e-288
Sus_scrofa___ANO6	35.8896	2.4767	4.43201e-282	1.8617e-279
Sus_scrofa___RASGRP3	35.8376	5.54051	2.86974e-281	1.19176e-278
Sus_scrofa___RGCC	35.7758	8.1878	2.62845e-280	1.07929e-277
Sus_scrofa___BMPR2	35.6226	2.35812	6.25734e-278	2.54083e-275
Sus_scrofa___CHST15	35.6217	5.71062	6.47493e-278	2.60029e-275
Sus_scrofa___PLS3	35.5945	3.41276	1.70099e-277	6.7568e-275
Sus_scrofa___ADAMTS9	35.5614	3.08039	5.53193e-277	2.17381e-274
Sus_scrofa___HSPG2	35.5441	2.42437	1.02559e-276	3.98726e-274
Sus_scrofa___RBMS3	35.323	2.37405	2.60707e-273	1.0029e-270
Sus_scrofa___ADGRL2	35.2605	2.81566	2.36893e-272	9.01797e-270
Sus_scrofa___EXOC6B	35.2251	1.69371	8.26355e-272	3.11331e-269
Sus_scrofa___TIMP3	35.2245	2.60677	8.43825e-272	3.14669e-269
Sus_scrofa___PICALM	35.1862	2.12199	3.25371e-271	1.20108e-268
Sus_scrofa___MGAT5	35.1736	2.15643	5.0604e-271	1.84932e-268
Sus_scrofa___TSPAN13	35.1254	7.81011	2.76457e-270	1.00031e-267
Sus_scrofa___CRIM1	35.1109	3.14496	4.59101e-270	1.64489e-267
Sus_scrofa___ITGA1	34.81	3.73663	1.71498e-265	6.08486e-263
Sus_scrofa___MRTFB	34.6645	2.26245	2.69764e-263	9.38907e-261
Sus_scrofa___SYNE2	34.4805	3.22103	1.57311e-260	5.37284e-258

## Sheet: Endo_lymph EC
Gene	scores	log2FC	pvals	FDR
Sus_scrofa___SEMA6A	17.0722	5.89909	2.39092e-65	8.7376e-61
Sus_scrofa___DOCK9	16.4616	4.35806	6.92615e-61	1.26558e-56
Sus_scrofa___MAGI1	16.107	3.7583	2.27837e-58	2.77543e-54
Sus_scrofa___LDB2	15.6395	4.49932	3.92083e-55	3.58217e-51
Sus_scrofa___DAPK1	15.4175	3.71192	1.24876e-53	9.12718e-50
Sus_scrofa___MMRN1	15.1522	10.7617	7.32591e-52	4.46209e-48
Sus_scrofa___STOX2	15.0673	4.733	2.65661e-51	1.28323e-47
Sus_scrofa___PARD6G	15.0636	7.91995	2.80909e-51	1.28323e-47
Sus_scrofa___OSBPL6	15.0165	5.70581	5.72239e-51	2.32361e-47
Sus_scrofa___RELN	14.7942	9.05686	1.59767e-49	5.83868e-46
Sus_scrofa___ZDHHC20	14.7359	4.10878	3.79083e-49	1.25942e-45
Sus_scrofa___NTN1	14.4518	6.20682	2.44179e-47	7.43626e-44
Sus_scrofa___CDKL1	14.3911	5.38627	5.88093e-47	1.65322e-43
Sus_scrofa___PLEKHG1	14.075	3.50543	5.41042e-45	1.41231e-41
Sus_scrofa___STON2	13.8516	4.97405	1.24342e-43	3.02939e-40
Sus_scrofa___FRMD4B	13.7971	3.12729	2.65355e-43	6.06087e-40
Sus_scrofa___VAV3	13.6	3.7737	4.00669e-42	8.61321e-39
Sus_scrofa___TSPAN5	13.4264	5.71006	4.23344e-41	8.59506e-38
Sus_scrofa___NXN	13.4105	4.02045	5.25153e-41	1.01009e-37
Sus_scrofa___CNKSR3	13.3961	3.95816	6.37065e-41	1.16408e-37
Sus_scrofa___RASAL2	13.05	2.83828	6.35099e-39	1.10522e-35
Sus_scrofa___ANKS1A	13.022	3.01122	9.17624e-39	1.5243e-35
Sus_scrofa___RALGAPA2	12.9111	4.40593	3.89511e-38	6.18898e-35
Sus_scrofa___CMIP	12.8411	3.41677	9.64391e-38	1.46849e-34
Sus_scrofa___FLRT2	12.8151	4.74241	1.34986e-37	1.97323e-34
Sus_scrofa___ITGA9	12.7077	3.35202	5.35682e-37	7.52943e-34
Sus_scrofa___FOXP1	12.6431	2.03838	1.22212e-36	1.64765e-33
Sus_scrofa___KIAA1217	12.6405	2.85953	1.26239e-36	1.64765e-33
Sus_scrofa___ENSSSCG00000039658	12.4887	4.34364	8.60871e-36	1.06371e-32
Sus_scrofa___MAP3K1	12.4875	3.87239	8.73204e-36	1.06371e-32
Sus_scrofa___NRP2	12.3776	4.10092	3.4552e-35	4.07323e-32
Sus_scrofa___LYVE1	12.276	6.8523	1.21836e-34	1.39141e-31
Sus_scrofa___PECAM1	12.1653	3.48325	4.75535e-34	5.26619e-31
Sus_scrofa___ASAP1	11.9292	2.52984	8.33803e-33	8.96215e-30
Sus_scrofa___TLL1	11.9147	8.57456	9.91778e-33	1.03556e-29
Sus_scrofa___UVRAG	11.8873	2.17688	1.37743e-32	1.39828e-29
Sus_scrofa___GPM6A	11.824	7.10403	2.93403e-32	2.89795e-29
Sus_scrofa___PDE7B	11.8073	2.80142	3.5794e-32	3.44235e-29
Sus_scrofa___GALNT1	11.7576	2.93736	6.45302e-32	6.04681e-29
Sus_scrofa___PLPP1	11.5904	2.44423	4.61082e-31	4.21256e-28
Sus_scrofa___SASH1	11.5337	2.46471	8.92242e-31	7.95293e-28
Sus_scrofa___TSPAN18	11.4982	3.58082	1.34618e-30	1.17134e-27
Sus_scrofa___ENSSSCG00000015645	11.4165	2.55663	3.45999e-30	2.94059e-27
Sus_scrofa___PGM5	11.3301	3.46914	9.31126e-30	7.73364e-27
Sus_scrofa___DOCK4	11.3249	2.85979	9.87622e-30	8.02059e-27
Sus_scrofa___UTRN	11.2565	2.05757	2.15229e-29	1.7099e-26
Sus_scrofa___GLIS3	11.2112	2.66574	3.5947e-29	2.79507e-26
Sus_scrofa___FLT4	11.1214	8.30832	9.87467e-29	7.51812e-26
Sus_scrofa___ZDHHC14	11.1066	4.28695	1.16504e-28	8.68905e-26
Sus_scrofa___RAI14	11.081	3.0502	1.55115e-28	1.13374e-25
Sus_scrofa___NOS1AP	11.0363	4.98383	2.55454e-28	1.8305e-25
Sus_scrofa___EMCN	11.0184	3.94425	3.11462e-28	2.18892e-25
Sus_scrofa___MAN2A1	11.0045	3.03991	3.63678e-28	2.50766e-25
Sus_scrofa___TBX1	10.9865	9.32116	4.43904e-28	3.00416e-25
Sus_scrofa___RASGRP3	10.9014	4.24373	1.13457e-27	7.53867e-25
Sus_scrofa___ZNF521	10.6758	2.26062	1.32116e-26	8.62173e-24
Sus_scrofa___MACROD2	10.6612	3.36518	1.54649e-26	9.91518e-24
Sus_scrofa___REV1	10.6148	2.77564	2.54301e-26	1.60231e-23
Sus_scrofa___PTPRE	10.6085	4.17539	2.72066e-26	1.68519e-23
Sus_scrofa___MGAT5	10.4612	2.04153	1.30176e-25	7.92878e-23
Sus_scrofa___ENSSSCG00000005518	10.4225	2.26726	1.95815e-25	1.17313e-22
Sus_scrofa___MYO7A	10.323	4.79411	5.5461e-25	3.26907e-22
Sus_scrofa___WASF3	10.318	2.8553	5.84079e-25	3.38812e-22
Sus_scrofa___PALD1	10.29	4.35905	7.81851e-25	4.46449e-22
Sus_scrofa___ELK3	10.2572	3.71037	1.0984e-24	6.17553e-22
Sus_scrofa___PELI2	10.2425	2.562	1.27942e-24	7.02209e-22
Sus_scrofa___ETS1	10.2419	3.20465	1.2874e-24	7.02209e-22
Sus_scrofa___PPP3CA	10.2027	2.19482	1.92737e-24	1.03582e-21
Sus_scrofa___FMNL2	10.197	2.53947	2.04551e-24	1.08338e-21
Sus_scrofa___BMP6	10.1761	3.96738	2.5356e-24	1.32377e-21
Sus_scrofa___ITPR1	10.1619	2.58853	2.93422e-24	1.5103e-21
Sus_scrofa___MAGI2	10.0356	3.09637	1.06336e-23	5.3973e-21
Sus_scrofa___SEMA3D	9.99345	6.08051	1.6281e-23	8.15051e-21
Sus_scrofa___ENSSSCG00000005095	9.90377	3.0387	4.00881e-23	1.97976e-20
Sus_scrofa___EPB41L2	9.89921	2.36629	4.19582e-23	2.04448e-20
Sus_scrofa___TIMP3	9.83703	2.13032	7.79802e-23	3.74972e-20
Sus_scrofa___SNED1	9.78314	3.74946	1.33015e-22	6.31302e-20
Sus_scrofa___LRRC1	9.77369	5.16004	1.46031e-22	6.84192e-20
Sus_scrofa___GALNT18	9.76452	3.20956	1.59869e-22	7.39547e-20
Sus_scrofa___ENSSSCG00000004081	9.72371	4.03213	2.38917e-22	1.0914e-19
Sus_scrofa___SNRK	9.65713	3.1826	4.5854e-22	2.06881e-19
Sus_scrofa___ADAMTS12	9.54822	2.71763	1.31948e-21	5.88051e-19
Sus_scrofa___PIP5K1C	9.54231	4.43877	1.39682e-21	6.15023e-19
Sus_scrofa___AFDN	9.52519	2.46342	1.64737e-21	7.16703e-19
Sus_scrofa___ZBTB20	9.50058	1.38105	2.08731e-21	8.97423e-19
Sus_scrofa___FLI1	9.4984	2.56939	2.1314e-21	9.05722e-19
Sus_scrofa___AKAP12	9.49554	3.47074	2.19068e-21	9.2021e-19
Sus_scrofa___ENSSSCG00000043817	9.41459	2.42269	4.74943e-21	1.97236e-18
Sus_scrofa___FGD5	9.40802	2.791	5.05579e-21	2.076e-18
Sus_scrofa___SNCAIP	9.3745	5.25386	6.95057e-21	2.82232e-18
Sus_scrofa___SNTB2	9.36776	2.45309	7.40864e-21	2.97526e-18
Sus_scrofa___ARHGAP29	9.27321	2.72908	1.80627e-20	7.17502e-18
Sus_scrofa___REV3L	9.25048	1.96055	2.23475e-20	8.78162e-18
Sus_scrofa___FBXL7	9.22647	1.62643	2.79694e-20	1.08739e-17
Sus_scrofa___DISC1	9.22096	2.47121	2.94445e-20	1.13268e-17
Sus_scrofa___TMTC1	9.203	3.67027	3.48082e-20	1.32507e-17
Sus_scrofa___VWF	9.18107	3.07908	4.26826e-20	1.60808e-17
Sus_scrofa___TNFAIP8L3	9.14716	7.02966	5.84484e-20	2.17959e-17
Sus_scrofa___RBMS3	9.12487	1.95829	7.18249e-20	2.65136e-17
Sus_scrofa___DLG1	9.114	1.73998	7.94001e-20	2.90168e-17

## Sheet: FB
Gene	scores	log2FC	pvals	FDR
Sus_scrofa___EBF1	91.1846	5.32337	0	0
Sus_scrofa___SPON1	85.4734	5.68404	0	0
Sus_scrofa___RORA	84.802	3.32657	0	0
Sus_scrofa___PLXDC2	83.9291	4.6845	0	0
Sus_scrofa___PID1	83.4759	4.76966	0	0
Sus_scrofa___COL5A2	82.4033	5.51162	0	0
Sus_scrofa___MAML2	80.6173	3.83228	0	0
Sus_scrofa___COL6A3	79.8809	6.47649	0	0
Sus_scrofa___ENSSSCG00000044700	79.6671	3.58051	0	0
Sus_scrofa___BNC2	79.517	6.55121	0	0
Sus_scrofa___BICC1	79.3997	5.77668	0	0
Sus_scrofa___LPAR1	78.7225	7.39958	0	0
Sus_scrofa___RBMS3	78.3753	3.87106	0	0
Sus_scrofa___PLCB1	77.9841	4.14206	0	0
Sus_scrofa___COL3A1	76.3145	6.26911	0	0
Sus_scrofa___MED13L	75.1133	2.27547	0	0
Sus_scrofa___LAMC1	75.0275	2.90825	0	0
Sus_scrofa___ZEB1	74.4531	2.75303	0	0
Sus_scrofa___GSN	73.8885	4.94646	0	0
Sus_scrofa___FBN1	73.4457	4.58699	0	0
Sus_scrofa___NFIA	73.3549	2.28909	0	0
Sus_scrofa___ZBTB20	73.0042	2.10145	0	0
Sus_scrofa___DCN	72.2102	7.64859	0	0
Sus_scrofa___TGFBR3	71.7108	4.43246	0	0
Sus_scrofa___SOX5	70.5954	3.76076	0	0
Sus_scrofa___ALDH1A2	70.0887	7.36947	0	0
Sus_scrofa___COL4A2	69.0711	2.82131	0	0
Sus_scrofa___PLSCR4	68.7796	4.22135	0	0
Sus_scrofa___FOXO1	67.3772	3.55557	0	0
Sus_scrofa___ABCA6	67.3389	6.31604	0	0
Sus_scrofa___ATRNL1	67.0478	5.91533	0	0
Sus_scrofa___PARD3	66.171	2.20841	0	0
Sus_scrofa___FMNL2	65.5036	4.1186	0	0
Sus_scrofa___NID1	64.714	3.23805	0	0
Sus_scrofa___EXT1	64.631	2.57127	0	0
Sus_scrofa___FNDC3B	64.5119	1.91015	0	0
Sus_scrofa___ENSSSCG00000004207	64.1064	3.67087	0	0
Sus_scrofa___TCF4	63.5804	2.72661	0	0
Sus_scrofa___PTGIS	63.2877	6.02717	0	0
Sus_scrofa___PDE1A	63.1015	4.59252	0	0
Sus_scrofa___EGFR	62.8603	6.10803	0	0
Sus_scrofa___FAM171A1	62.6802	4.70387	0	0
Sus_scrofa___SESTD1	62.0946	3.1941	0	0
Sus_scrofa___LTBP1	61.7312	3.4875	0	0
Sus_scrofa___TRPS1	61.6858	3.13481	0	0
Sus_scrofa___COL6A1	61.5877	5.88703	0	0
Sus_scrofa___APBB2	61.2968	2.77431	0	0
Sus_scrofa___ADGRD1	60.6044	4.54424	0	0
Sus_scrofa___DLC1	60.4743	1.94714	0	0
Sus_scrofa___MGP	59.7886	6.65354	0	0
Sus_scrofa___GPC6	59.2774	5.23469	0	0
Sus_scrofa___GLI3	59.242	4.03903	0	0
Sus_scrofa___PRKG1	59.0306	2.56846	0	0
Sus_scrofa___COL1A2	58.8612	5.87185	0	0
Sus_scrofa___NAALADL2	58.5258	4.02619	0	0
Sus_scrofa___MFAP5	58.3436	7.55536	0	0
Sus_scrofa___SOBP	58.2348	5.10874	0	0
Sus_scrofa___EPB41L2	57.8352	3.23142	0	0
Sus_scrofa___SH3D19	57.697	3.73212	0	0
Sus_scrofa___SULF1	57.6288	4.21541	0	0
Sus_scrofa___CDH11	57.5625	6.40107	0	0
Sus_scrofa___COL1A1	57.458	6.17798	0	0
Sus_scrofa___UST	57.4484	3.29079	0	0
Sus_scrofa___WASF3	57.1085	4.71464	0	0
Sus_scrofa___AKT3	56.2631	2.64834	0	0
Sus_scrofa___SASH1	56.1257	2.83783	0	0
Sus_scrofa___CALD1	55.9765	2.47492	0	0
Sus_scrofa___ARHGAP10	55.8889	2.04028	0	0
Sus_scrofa___SVEP1	55.7916	3.93997	0	0
Sus_scrofa___ENSSSCG00000015814	55.7108	3.5214	0	0
Sus_scrofa___ZBTB16	55.2142	1.68166	0	0
Sus_scrofa___FKBP5	55.1317	1.60177	0	0
Sus_scrofa___TCF7L2	54.8013	2.62699	0	0
Sus_scrofa___PCSK6	54.5808	3.99975	0	0
Sus_scrofa___PTPN13	54.0961	4.05596	0	0
Sus_scrofa___EBF2	53.9355	3.73744	0	0
Sus_scrofa___AUTS2	53.7691	2.11666	0	0
Sus_scrofa___COL15A1	52.9046	5.40813	0	0
Sus_scrofa___SPARCL1	52.3372	4.04499	0	0
Sus_scrofa___NOVA1	52.2604	3.71361	0	0
Sus_scrofa___ENSSSCG00000003839	52.1397	2.84399	0	0
Sus_scrofa___PBX1	51.4501	1.879	0	0
Sus_scrofa___ZFPM2	51.3464	1.56936	0	0
Sus_scrofa___NOX4	51.3129	3.76258	0	0
Sus_scrofa___SRGAP1	51.1138	4.1557	0	0
Sus_scrofa___ABCA8	51.0993	5.32344	0	0
Sus_scrofa___ENSSSCG00000004387	51.0609	1.94519	0	0
Sus_scrofa___FN1	50.9038	6.10836	0	0
Sus_scrofa___COLEC12	50.0328	3.01348	0	0
Sus_scrofa___THRB	49.9654	1.63152	0	0
Sus_scrofa___RGMA	49.5088	5.41295	0	0
Sus_scrofa___VCAN	49.5032	3.12295	0	0
Sus_scrofa___COL8A1	49.4332	7.34578	0	0
Sus_scrofa___STAG1	49.299	1.75542	0	0
Sus_scrofa___CHD9	49.202	1.87037	0	0
Sus_scrofa___ENSSSCG00000002259	48.89	1.67352	0	0
Sus_scrofa___CLMP	48.5314	6.80859	0	0
Sus_scrofa___MAGI2	48.297	4.81695	0	0
Sus_scrofa___ABI3BP	48.2648	5.50096	0	0
Sus_scrofa___ENSSSCG00000009672	48.1051	6.96692	0	0

## Sheet: Sus_lymph
Gene	scores	log2FC	pvals	FDR
Sus_scrofa___DOCK10	12.5757	5.37822	2.87155e-36	7.44845e-32
Sus_scrofa___PTPRC	12.548	6.45717	4.07632e-36	7.44845e-32
Sus_scrofa___CCND3	11.5216	4.1318	1.02679e-30	1.2508e-26
Sus_scrofa___SKAP1	11.3605	8.9681	6.57353e-30	6.00574e-26
Sus_scrofa___CHST11	11.2417	5.34318	2.54386e-29	1.85931e-25
Sus_scrofa___ARHGAP15	11.1822	5.93974	4.98426e-29	3.03583e-25
Sus_scrofa___ENSSSCG00000001229	10.5998	3.66604	2.98462e-26	1.55818e-22
Sus_scrofa___ANKRD44	10.3116	3.80313	6.24303e-25	2.85189e-21
Sus_scrofa___PRKCB	9.85623	5.2297	6.4424e-23	2.61597e-19
Sus_scrofa___SCML4	9.74222	9.07513	1.99154e-22	7.27807e-19
Sus_scrofa___PREX1	9.71954	4.85272	2.48893e-22	8.26891e-19
Sus_scrofa___REV1	9.36785	3.71419	7.40281e-21	2.25446e-17
Sus_scrofa___RUNX1	9.33107	3.53226	1.04808e-20	2.94632e-17
Sus_scrofa___ETS1	9.21924	3.94404	2.99218e-20	7.81066e-17
Sus_scrofa___NOL11	9.18509	2.91715	4.11174e-20	1.00176e-16
Sus_scrofa___DOCK2	9.02436	5.62314	1.80747e-19	4.12838e-16
Sus_scrofa___NCALD	9.00023	4.47994	2.25239e-19	4.84198e-16
Sus_scrofa___SFMBT2	8.81869	4.00635	1.15807e-18	2.35121e-15
Sus_scrofa___RIPOR2	8.78929	5.03532	1.50507e-18	2.89489e-15
Sus_scrofa___ITGA4	8.71725	8.62629	2.85042e-18	5.20842e-15
Sus_scrofa___MYCBP2	8.64719	2.52092	5.27812e-18	9.18519e-15
Sus_scrofa___FRYL	8.627	2.72585	6.2984e-18	1.02719e-14
Sus_scrofa___IKZF1	8.62401	6.77018	6.46475e-18	1.02719e-14
Sus_scrofa___ENSSSCG00000013568	8.5417	5.53811	1.32259e-17	2.01391e-14
Sus_scrofa___VAV3	8.42471	3.40829	3.6164e-17	5.28645e-14
Sus_scrofa___PIP4K2A	8.32946	3.08908	8.1212e-17	1.1415e-13
Sus_scrofa___RABGAP1L	8.1239	2.42583	4.51441e-16	6.11033e-13
Sus_scrofa___CAMK4	8.07334	8.19177	6.83977e-16	8.92712e-13
Sus_scrofa___FLI1	7.8927	3.39428	2.95721e-15	3.72659e-12
Sus_scrofa___FNBP1	7.73323	3.37128	1.04854e-14	1.2773e-11
Sus_scrofa___IKZF2	7.50945	4.42978	5.93742e-14	6.99945e-11
Sus_scrofa___ENSSSCG00000005095	7.49724	3.7239	6.51758e-14	7.44328e-11
Sus_scrofa___IKZF3	7.28986	8.67498	3.10266e-13	3.43597e-10
Sus_scrofa___FYN	7.25875	2.42127	3.90677e-13	4.1992e-10
Sus_scrofa___FKBP5	7.21886	1.45753	5.24245e-13	5.47386e-10
Sus_scrofa___IQGAP2	7.01155	3.09525	2.35696e-12	2.39265e-09
Sus_scrofa___STK10	6.98113	3.98612	2.92814e-12	2.89213e-09
Sus_scrofa___ENSSSCG00000005518	6.97422	2.04115	3.07579e-12	2.95802e-09
Sus_scrofa___CD247	6.83997	7.43637	7.92089e-12	7.06022e-09
Sus_scrofa___SF3B1	6.82633	2.11269	8.71173e-12	7.58024e-09
Sus_scrofa___ENSSSCG00000014280	6.72872	2.34002	1.71168e-11	1.35985e-08
Sus_scrofa___DOCK8	6.56769	4.84712	5.11013e-11	3.81122e-08
Sus_scrofa___RCSD1	6.56416	3.15363	5.23256e-11	3.82448e-08
Sus_scrofa___NLRC3	6.46871	8.48348	9.88427e-11	6.94655e-08
Sus_scrofa___ASAP1	6.4514	2.16303	1.10825e-10	7.64168e-08
Sus_scrofa___LCP1	6.44487	5.10554	1.15696e-10	7.82982e-08
Sus_scrofa___ROCK1	6.42072	2.05608	1.35634e-10	8.8572e-08
Sus_scrofa___PPP3CA	6.42062	1.98851	1.35724e-10	8.8572e-08
Sus_scrofa___STK17B	6.40174	4.11515	1.53617e-10	9.84901e-08
Sus_scrofa___PARP8	6.36403	2.8937	1.96534e-10	1.21734e-07
Sus_scrofa___TNFAIP8	6.35042	4.96919	2.14729e-10	1.28644e-07
Sus_scrofa___TNIK	6.31509	2.33017	2.69997e-10	1.58498e-07
Sus_scrofa___CD2	6.31325	11.6157	2.73236e-10	1.58498e-07
Sus_scrofa___ARHGAP25	6.29909	4.5422	2.99399e-10	1.68331e-07
Sus_scrofa___LCP2	6.2695	5.2712	3.62211e-10	1.97567e-07
Sus_scrofa___SLC9A9	6.25778	2.4159	3.90501e-10	2.09866e-07
Sus_scrofa___TOX	6.16235	6.44082	7.16709e-10	3.781e-07
Sus_scrofa___ENSSSCG00000039706	6.05581	7.47063	1.39717e-09	6.80794e-07
Sus_scrofa___XYLT1	6.01186	2.15694	1.83403e-09	8.7045e-07
Sus_scrofa___SNTB1	5.95264	3.48417	2.63848e-09	1.19041e-06
Sus_scrofa___RALGAPA2	5.9445	3.38866	2.77304e-09	1.23586e-06
Sus_scrofa___FAM172A	5.91185	1.72357	3.38277e-09	1.47171e-06
Sus_scrofa___INPP5D	5.89984	4.14373	3.63852e-09	1.56435e-06
Sus_scrofa___STAT4	5.86916	8.06445	4.38003e-09	1.86126e-06
Sus_scrofa___STAG1	5.81205	1.44155	6.17134e-09	2.50591e-06
Sus_scrofa___RUNX2	5.71111	3.38944	1.12241e-08	4.10184e-06
Sus_scrofa___ENSSSCG00000000657	5.69733	3.95314	1.21695e-08	4.27631e-06
Sus_scrofa___NLRC5	5.66122	3.48038	1.50298e-08	5.02686e-06
Sus_scrofa___TTF2	5.63318	4.70656	1.76912e-08	5.62196e-06
Sus_scrofa___CD44	5.62581	2.7363	1.84643e-08	5.71845e-06
Sus_scrofa___STK39	5.53357	2.17144	3.1378e-08	9.0292e-06
Sus_scrofa___ENSSSCG00000027790	5.51914	5.84344	3.4067e-08	9.65099e-06
Sus_scrofa___CD96	5.48922	10.0497	4.03705e-08	1.11768e-05
Sus_scrofa___TXK	5.46681	8.4751	4.58209e-08	1.19609e-05
Sus_scrofa___ENSSSCG00000036556	5.43022	3.49642	5.62833e-08	1.42839e-05
Sus_scrofa___NFATC3	5.39629	2.06311	6.8033e-08	1.70292e-05
Sus_scrofa___CRLF3	5.38643	3.92333	7.18697e-08	1.77465e-05
Sus_scrofa___ENSSSCG00000007322	5.38219	4.11604	7.3585e-08	1.80481e-05
Sus_scrofa___MBNL1	5.38049	1.28353	7.42847e-08	1.80982e-05
Sus_scrofa___TSPAN5	5.36267	4.29427	8.20016e-08	1.95866e-05
Sus_scrofa___TRERF1	5.30617	3.05115	1.11954e-07	2.55709e-05
Sus_scrofa___ENSSSCG00000024973	5.28704	3.75296	1.24312e-07	2.80431e-05
Sus_scrofa___ANKRD12	5.2622	1.38791	1.42345e-07	3.11497e-05
Sus_scrofa___PRRC2B	5.24326	2.07612	1.57766e-07	3.38384e-05
Sus_scrofa___THSD7B	5.21953	5.32243	1.79374e-07	3.78915e-05
Sus_scrofa___ENSSSCG00000028092	5.2127	3.97013	1.86111e-07	3.88654e-05
Sus_scrofa___COX1	5.19694	2.18975	2.02598e-07	4.13629e-05
Sus_scrofa___UTRN	5.18017	1.22847	2.21687e-07	4.42709e-05
Sus_scrofa___DPYD	5.11164	1.62754	3.19368e-07	6.20815e-05
Sus_scrofa___ARAP2	5.10057	3.50373	3.38637e-07	6.54788e-05
Sus_scrofa___ANKRD11	5.09527	1.7276	3.48252e-07	6.66329e-05
Sus_scrofa___ENSSSCG00000032552	5.06555	3.84699	4.07213e-07	7.61801e-05
Sus_scrofa___WBP1L	5.06492	2.52204	4.08573e-07	7.61801e-05
Sus_scrofa___ITK	5.06214	8.76401	4.14581e-07	7.65195e-05
Sus_scrofa___STIM1	5.05938	3.52863	4.2063e-07	7.72458e-05
Sus_scrofa___SAMHD1	5.05374	3.27078	4.33236e-07	7.9163e-05
Sus_scrofa___UBASH3B	4.99436	3.18171	5.90312e-07	0.000103716
Sus_scrofa___NCOA2	4.97337	1.27453	6.58001e-07	0.000114508
Sus_scrofa___SAT1	4.9721	1.45662	6.62326e-07	0.000114714
Sus_scrofa___ENSSSCG00000016263	4.88541	2.58064	1.03213e-06	0.000170675

## Sheet: Sus_mye
Gene	scores	log2FC	pvals	FDR
Sus_scrofa___CD163	49.3353	12.1199	0	0
Sus_scrofa___RBPJ	48.4659	6.53411	0	0
Sus_scrofa___FKBP5	48.2527	3.60542	0	0
Sus_scrofa___FRMD4B	47.0303	5.57368	0	0
Sus_scrofa___AGAP1	44.9245	3.69883	0	0
Sus_scrofa___DAB2	44.626	6.08434	0	0
Sus_scrofa___MRC1	44.559	9.753	0	0
Sus_scrofa___ENSSSCG00000031640	42.2858	11.6576	0	0
Sus_scrofa___ENSSSCG00000005518	41.5393	4.04229	0	0
Sus_scrofa___STAB1	41.4313	9.29837	0	0
Sus_scrofa___ENSSSCG00000032896	41.4269	11.0751	0	0
Sus_scrofa___SLC9A9	40.9822	5.00676	0	0
Sus_scrofa___ARHGAP24	40.1284	3.17883	0	0
Sus_scrofa___TUT7	39.6135	4.20297	0	0
Sus_scrofa___ZEB2	39.3071	4.19508	0	0
Sus_scrofa___HDAC9	39.0106	3.85022	0	0
Sus_scrofa___BANK1	38.9256	9.26636	0	0
Sus_scrofa___RGL1	38.6896	5.09516	0	0
Sus_scrofa___CSF1R	38.6074	10.175	0	0
Sus_scrofa___GRK3	38.3522	5.04528	0	0
Sus_scrofa___CADM1	37.7402	6.15722	0	0
Sus_scrofa___COLEC12	37.7209	4.7231	0	0
Sus_scrofa___VAV3	37.0774	4.89308	6.4973e-301	1.03237e-297
Sus_scrofa___OSBPL11	35.7075	4.17588	3.02538e-279	4.2524e-276
Sus_scrofa___IQGAP2	34.8299	5.04547	8.56928e-266	1.15987e-262
Sus_scrofa___ENSSSCG00000015645	34.7052	3.94437	6.5658e-264	8.56954e-261
Sus_scrofa___FCHSD2	34.0366	3.88905	6.41581e-254	8.08502e-251
Sus_scrofa___MTSS1	33.9556	4.34918	1.00712e-252	1.22684e-249
Sus_scrofa___MARCHF1	33.9467	8.45916	1.36225e-252	1.60591e-249
Sus_scrofa___SGMS1	33.1234	2.2512	1.36803e-240	1.47043e-237
Sus_scrofa___LRMDA	32.7215	2.92455	7.72408e-235	7.6291e-232
Sus_scrofa___FOXP1	32.5235	2.16928	4.95894e-232	4.76907e-229
Sus_scrofa___TRPS1	31.9147	3.19412	1.66864e-223	1.52451e-220
Sus_scrofa___ITSN1	31.6295	3.59603	1.45351e-219	1.29557e-216
Sus_scrofa___TNS3	31.5878	5.15468	5.43383e-219	4.72808e-216
Sus_scrofa___UBASH3B	31.5245	5.98732	4.01311e-218	3.41068e-215
Sus_scrofa___BLNK	31.4905	9.79299	1.17185e-217	9.73299e-215
Sus_scrofa___SNX9	31.1286	3.28359	9.87266e-213	7.8434e-210
Sus_scrofa___MERTK	30.9371	6.06873	3.78656e-210	2.82408e-207
Sus_scrofa___PIK3C2A	30.4457	3.36428	1.36474e-203	9.41029e-201
Sus_scrofa___DEPTOR	30.0769	4.98551	9.70663e-199	6.33444e-196
Sus_scrofa___MEF2C	29.919	2.58416	1.11349e-196	7.139e-194
Sus_scrofa___LRRC8D	29.8603	5.16388	6.45294e-196	4.06591e-193
Sus_scrofa___SMAP2	29.75	5.835	1.73378e-194	1.07391e-191
Sus_scrofa___APBB1IP	29.5214	8.23433	1.53122e-191	9.17353e-189
Sus_scrofa___FLI1	29.2713	4.07954	2.4035e-188	1.39422e-185
Sus_scrofa___MEF2A	29.0757	1.91761	7.28933e-186	3.91748e-183
Sus_scrofa___ARHGAP15	29.0597	6.78961	1.15985e-185	6.14301e-183
Sus_scrofa___EPB41L3	28.7788	2.47298	3.95129e-182	2.00556e-179
Sus_scrofa___VSIG4	28.753	10.7973	8.31889e-182	4.16457e-179
Sus_scrofa___PSD3	28.7155	2.86346	2.44695e-181	1.20843e-178
Sus_scrofa___BMP2K	28.6843	4.07798	5.98149e-181	2.91458e-178
Sus_scrofa___GAS7	28.4678	3.86049	2.93081e-178	1.4093e-175
Sus_scrofa___FGD2	28.3456	10.6203	9.48951e-177	4.44608e-174
Sus_scrofa___APC	28.275	3.29359	7.01088e-176	3.2432e-173
Sus_scrofa___ENSSSCG00000013100	28.1331	9.64799	3.86064e-174	1.76359e-171
Sus_scrofa___PTPRJ	27.7462	4.07111	1.93846e-169	8.33423e-167
Sus_scrofa___DOCK10	27.7245	5.09493	3.53615e-169	1.50266e-166
Sus_scrofa___NAV3	27.6604	4.72642	2.09055e-168	8.78151e-166
Sus_scrofa___PRKCB	27.5903	6.43315	1.45353e-167	5.96844e-165
Sus_scrofa___WDFY3	27.5758	2.47541	2.17083e-167	8.81479e-165
Sus_scrofa___KYNU	27.1057	8.1173	8.43455e-162	3.38726e-159
Sus_scrofa___APP	26.7708	2.43114	7.06361e-158	2.66123e-155
Sus_scrofa___DIP2B	26.742	2.83121	1.53158e-157	5.71139e-155
Sus_scrofa___DOCK2	26.7299	7.7348	2.11573e-157	7.81003e-155
Sus_scrofa___FCHO2	26.5489	3.03415	2.64374e-155	9.28995e-153
Sus_scrofa___SBF2	26.463	1.85999	2.58325e-154	8.99094e-152
Sus_scrofa___ATG4C	26.4343	5.35738	5.52713e-154	1.90556e-151
Sus_scrofa___RBM47	26.2982	7.86552	2.00888e-152	6.73526e-150
Sus_scrofa___DOCK4	26.1906	3.2753	3.40342e-151	1.13071e-148
Sus_scrofa___PDE7B	25.7933	3.04031	1.05557e-146	3.24166e-144
Sus_scrofa___ARHGAP22	25.1052	4.73466	4.36252e-139	1.24553e-136
Sus_scrofa___HPCAL1	25.0217	4.54121	3.5488e-138	1.00535e-135
Sus_scrofa___F13A1	24.7598	9.96055	2.43004e-135	6.77908e-133
Sus_scrofa___GNAQ	24.4986	2.43572	1.52908e-132	4.13928e-130
Sus_scrofa___PRKAG2	24.33	2.2267	9.43782e-131	2.53607e-128
Sus_scrofa___ANKS1A	24.118	3.09372	1.62022e-128	4.29064e-126
Sus_scrofa___GLUL	24.0761	4.39955	4.44499e-128	1.1603e-125
Sus_scrofa___DISC1	24.0005	3.3696	2.74774e-127	7.02211e-125
Sus_scrofa___TCF12	23.9864	1.45591	3.8542e-127	9.78137e-125
Sus_scrofa___NCOA2	23.8992	2.01359	3.12098e-126	7.75893e-124
Sus_scrofa___CCND3	23.8853	2.97151	4.35705e-126	1.07587e-123
Sus_scrofa___PIP4K2A	23.8383	3.24496	1.33963e-125	3.2857e-123
Sus_scrofa___ARHGAP6	23.799	3.81875	3.4197e-125	8.33153e-123
Sus_scrofa___OTULINL	23.6075	7.40825	3.23125e-123	7.47379e-121
Sus_scrofa___CCDC88A	23.5246	3.66263	2.28246e-122	5.14892e-120
Sus_scrofa___PTPRC	23.3783	5.5278	7.10089e-121	1.58233e-118
Sus_scrofa___TMCC1	23.0563	2.11712	1.27251e-117	2.64227e-115
Sus_scrofa___PICALM	22.919	2.15077	3.0019e-116	6.0947e-114
Sus_scrofa___ZNF710	22.9121	3.95646	3.51727e-116	7.10159e-114
Sus_scrofa___ANKRD11	22.8702	2.49705	9.20018e-116	1.83727e-113
Sus_scrofa___BCAT1	22.8442	5.45251	1.66794e-115	3.29486e-113
Sus_scrofa___SAT1	22.4851	2.21627	5.8053e-112	1.09925e-109
Sus_scrofa___ENSSSCG00000016687	22.2308	4.32557	1.72906e-109	3.1437e-107
Sus_scrofa___LGMN	22.2196	6.16067	2.22157e-109	4.01917e-107
Sus_scrofa___P2RY12	22.049	8.01439	9.7677e-108	1.70795e-105
Sus_scrofa___RIN2	21.8407	2.51779	9.52924e-106	1.60482e-103
Sus_scrofa___ITGA9	21.7989	3.14104	2.37865e-105	3.98751e-103
Sus_scrofa___AP1B1	21.7892	4.89595	2.93635e-105	4.89995e-103
Sus_scrofa___UVRAG	21.6325	1.94744	8.87766e-104	1.44193e-101

## Sheet: Lymph_human
Gene	scores	log2FC	pvals	FDR
Homo_sapiens_SKAP1	39.6783	12.6261	0	0
Homo_sapiens_CBLB	39.5331	7.11189	0	0
Homo_sapiens_PRKCH	38.1571	8.10596	0	0
Homo_sapiens_CELF2	37.7193	4.65551	0	0
Homo_sapiens_MALAT1	37.4025	6.25868	3.55778e-306	2.60038e-302
Homo_sapiens_ARHGAP15	37.2305	5.03291	2.19249e-303	1.33541e-299
Homo_sapiens_CHST11	37.0692	4.6586	8.82597e-301	4.60779e-297
Homo_sapiens_PARP8	36.9654	6.47194	4.11474e-299	1.87967e-295
Homo_sapiens_ATXN1	36.7694	5.16198	5.70053e-296	2.31473e-292
Homo_sapiens_PTPRC	35.9279	4.80078	1.11877e-282	4.08855e-279
Homo_sapiens_MBNL1	35.8298	4.57973	3.78892e-281	1.25878e-277
Homo_sapiens_FYN	35.6571	8.16682	1.82656e-278	5.56263e-275
Homo_sapiens_LRBA	35.6144	6.02996	8.38234e-278	2.3564e-274
Homo_sapiens_PIP4K2A	35.4995	5.12878	5.00416e-276	1.30626e-272
Homo_sapiens_RABGAP1L	35.0198	5.1305	1.12362e-268	2.73751e-265
Homo_sapiens_PDE3B	34.2338	5.84973	7.60643e-257	1.54432e-253
Homo_sapiens_THEMIS	33.6679	11.4981	1.70867e-248	3.12217e-245
Homo_sapiens_ANKRD44	33.1449	4.59771	6.7e-241	1.16596e-237
Homo_sapiens_ETS1	32.8268	10.6811	2.43908e-236	4.05164e-233
Homo_sapiens_CD247	32.6043	9.64635	3.56573e-233	5.42957e-230
Homo_sapiens_KANSL1	32.2361	4.26397	5.51574e-228	7.46566e-225
Homo_sapiens_FKBP5	31.7664	3.74894	1.88716e-221	2.22472e-218
Homo_sapiens_FOXN3	31.7044	3.93559	1.35029e-220	1.54208e-217
Homo_sapiens_BCL2	31.3062	6.63762	3.84448e-215	3.90269e-212
Homo_sapiens_TSPAN5	31.2872	9.00041	6.96632e-215	6.88065e-212
Homo_sapiens_PTPRJ	31.2803	4.10165	8.65883e-215	8.32089e-212
Homo_sapiens_FUT8	31.2389	6.59953	3.15998e-214	2.88703e-211
Homo_sapiens_LINC-PINT	31.0389	4.30552	1.6107e-211	1.3378e-208
Homo_sapiens_LYST	30.8891	5.21064	1.67551e-209	1.33112e-206
Homo_sapiens_IKZF1	30.8604	5.07623	4.06838e-209	3.16338e-206
Homo_sapiens_TOX	30.7383	12.0006	1.75157e-207	1.33357e-204
Homo_sapiens_CDC42SE2	30.5124	4.53031	1.78349e-204	1.278e-201
Homo_sapiens_CCND3	30.1004	4.77005	4.7922e-199	3.30436e-196
Homo_sapiens_PAM	30.0272	6.45597	4.33412e-198	2.8284e-195
Homo_sapiens_SP100	29.6339	4.39853	5.47027e-193	3.38832e-190
Homo_sapiens_SLFN12L	29.5863	7.41702	2.24226e-192	1.36572e-189
Homo_sapiens_SMCHD1	29.408	4.56022	4.33919e-190	2.55767e-187
Homo_sapiens_CD96	29.2046	11.1161	1.69716e-187	9.84485e-185
Homo_sapiens_DOCK2	29.1019	3.61545	3.39837e-186	1.91067e-183
Homo_sapiens_NEAT1	29.0877	3.26863	5.13205e-186	2.84168e-183
Homo_sapiens_RNF213	28.6435	3.5038	1.93054e-180	1.05301e-177
Homo_sapiens_ARID1B	28.506	3.98548	9.86618e-179	5.2255e-176
Homo_sapiens_SFMBT2	28.4544	3.89752	4.29679e-178	2.21164e-175
Homo_sapiens_NCALD	28.3754	11.4478	4.07061e-177	2.06612e-174
Homo_sapiens_DOCK8	28.2693	3.12129	8.25176e-176	4.07514e-173
Homo_sapiens_KLF12	28.1683	10.4445	1.43074e-174	6.97152e-172
Homo_sapiens_FOXO1	27.7979	6.42425	4.59669e-170	1.99983e-167
Homo_sapiens_SIPA1L1	27.7765	3.56457	8.35239e-170	3.59104e-167
Homo_sapiens_ELMO1	27.4211	3.51421	1.53493e-165	6.23269e-163
Homo_sapiens_AKAP13	27.4048	3.40409	2.40378e-165	9.65344e-163
Homo_sapiens_MCTP2	27.3589	7.87037	8.4703e-165	3.36464e-162
Homo_sapiens_MSI2	27.1934	6.04144	7.7672e-163	2.98792e-160
Homo_sapiens_PREX1	27.0163	3.98149	9.50915e-161	3.47512e-158
Homo_sapiens_RASA2	27.006	4.95667	1.25516e-160	4.54157e-158
Homo_sapiens_KMT2E	26.8174	4.15715	2.02553e-158	7.1867e-156
Homo_sapiens_SLC38A1	26.6269	9.85431	3.31596e-156	1.13254e-153
Homo_sapiens_PRKCA	26.5592	4.94492	2.01193e-155	6.62396e-153
Homo_sapiens_USP34	26.4461	3.98102	4.04985e-154	1.32144e-151
Homo_sapiens_VPS13B	26.4413	3.71391	4.59013e-154	1.48448e-151
Homo_sapiens_PCNX1	26.2992	4.03014	1.95689e-152	6.11235e-150
Homo_sapiens_CEP85L	26.2062	5.59707	2.25971e-151	6.88175e-149
Homo_sapiens_MACF1	26.1801	3.30431	4.47946e-151	1.35291e-148
Homo_sapiens_SUCLG2	26.1261	4.76367	1.84023e-150	5.46757e-148
Homo_sapiens_ANKRD12	25.9846	3.59977	7.38667e-149	2.14243e-146
Homo_sapiens_PDE7A	25.7012	5.08482	1.13353e-145	3.11466e-143
Homo_sapiens_SYNE2	25.6656	7.94518	2.8293e-145	7.65902e-143
Homo_sapiens_NAP1L4	25.5941	5.59093	1.77532e-144	4.73569e-142
Homo_sapiens_STAG1	25.5464	4.15002	6.01979e-144	1.58269e-141
Homo_sapiens_CLASP1	25.4645	3.89533	4.88307e-143	1.27466e-140
Homo_sapiens_SYTL3	25.4534	6.00718	6.46986e-143	1.67689e-140
Homo_sapiens_SMYD3	25.3199	4.35035	1.93014e-141	4.93265e-139
Homo_sapiens_CYRIB	25.257	3.14907	9.49711e-141	2.3936e-138
Homo_sapiens_NIBAN1	25.1137	5.50077	3.51986e-139	8.63311e-137
Homo_sapiens_INPP5D	25.0955	4.01357	5.57057e-139	1.35718e-136
Homo_sapiens_DOCK10	25.0582	3.66469	1.42264e-138	3.44307e-136
Homo_sapiens_INPP4B	25.029	7.8396	2.9582e-138	7.11234e-136
Homo_sapiens_BIRC6	24.9907	3.82986	7.70896e-138	1.82938e-135
Homo_sapiens_WNK1	24.9575	4.07008	1.76833e-137	4.14255e-135
Homo_sapiens_PRKCQ	24.9234	10.7327	4.15434e-137	9.67009e-135
Homo_sapiens_EVL	24.7835	5.18588	1.35051e-135	3.06548e-133
Homo_sapiens_PACS1	24.7678	4.66638	1.99563e-135	4.50187e-133
Homo_sapiens_UTRN	24.7276	3.03366	5.39487e-135	1.20954e-132
Homo_sapiens_SEMA4D	24.6886	5.25401	1.41946e-134	3.12495e-132
Homo_sapiens_IQGAP2	24.5724	3.2708	2.49325e-133	5.26682e-131
Homo_sapiens_TNRC6B	24.5285	3.65372	7.34328e-133	1.51616e-130
Homo_sapiens_RAPGEF1	24.4118	3.34157	1.28194e-131	2.58832e-129
Homo_sapiens_ARL15	24.4108	3.50082	1.31275e-131	2.63596e-129
Homo_sapiens_GMDS	24.3553	5.44704	5.0943e-131	9.95568e-129
Homo_sapiens_LINC01934	24.1619	10.9971	5.60249e-129	1.06637e-126
Homo_sapiens_SSH2	24.0749	3.14262	4.57932e-128	8.53834e-126
Homo_sapiens_PITPNC1	24.0134	4.83947	2.01531e-127	3.70097e-125
Homo_sapiens_ZFAND3	23.9609	3.10457	7.11015e-127	1.28634e-124
Homo_sapiens_PPP2R5C	23.9321	4.72203	1.42014e-126	2.54407e-124
Homo_sapiens_STAT4	23.8742	5.89158	5.67432e-126	1.01155e-123
Homo_sapiens_ZNF292	23.8545	3.75485	9.09277e-126	1.60529e-123
Homo_sapiens_ZEB1	23.6831	8.31001	5.37885e-124	9.27218e-122
Homo_sapiens_SIK3	23.6514	3.93943	1.14311e-123	1.96127e-121
Homo_sapiens_CCDC91	23.6132	4.27449	2.81738e-123	4.76672e-121
Homo_sapiens_ATRX	23.4963	4.02541	4.44524e-122	7.45189e-120
Homo_sapiens_PPP6R3	23.4826	4.06296	6.14732e-122	1.02582e-119

## Sheet: Mye_human
Gene	scores	log2FC	pvals	FDR
Homo_sapiens_MALAT1	81.3321	8.59991	0	0
Homo_sapiens_NEAT1	75.9951	6.89291	0	0
Homo_sapiens_DPYD	75.376	7.84271	0	0
Homo_sapiens_PLXDC2	72.35	11.6899	0	0
Homo_sapiens_FMN1	72.1324	11.489	0	0
Homo_sapiens_LRMDA	70.7371	11.2943	0	0
Homo_sapiens_FMNL2	70.1902	11.6959	0	0
Homo_sapiens_FKBP5	70.0103	5.99506	0	0
Homo_sapiens_SLC8A1	68.7686	11.4747	0	0
Homo_sapiens_KCNMA1	68.178	10.7921	0	0
Homo_sapiens_SAT1	67.9693	9.79369	0	0
Homo_sapiens_DOCK4	67.8137	11.3967	0	0
Homo_sapiens_DOCK8	66.2986	6.08674	0	0
Homo_sapiens_RBM47	65.68	11.1378	0	0
Homo_sapiens_ZEB2	65.1169	7.40939	0	0
Homo_sapiens_ETV6	63.7355	6.93289	0	0
Homo_sapiens_UTRN	62.9387	5.90957	0	0
Homo_sapiens_TBXAS1	62.806	10.2541	0	0
Homo_sapiens_CTSB	62.8055	10.2901	0	0
Homo_sapiens_MAML2	62.4488	5.20037	0	0
Homo_sapiens_CD163	61.8168	10.9312	0	0
Homo_sapiens_SPIDR	61.5729	6.1445	0	0
Homo_sapiens_RBPJ	61.0463	6.05286	0	0
Homo_sapiens_TBC1D22A	60.6902	6.27884	0	0
Homo_sapiens_GNAQ	60.0002	9.40488	0	0
Homo_sapiens_QKI	59.3918	6.20847	0	0
Homo_sapiens_FYB1	59.0185	6.01128	0	0
Homo_sapiens_CHST11	58.9585	4.98925	0	0
Homo_sapiens_ARHGAP26	58.6716	6.07181	0	0
Homo_sapiens_TNS3	58.4993	9.52782	0	0
Homo_sapiens_CYRIB	58.4919	5.63932	0	0
Homo_sapiens_LPP	58.3905	6.39796	0	0
Homo_sapiens_RNF213	58.3189	5.43979	0	0
Homo_sapiens_ZFAND3	58.2463	5.61678	0	0
Homo_sapiens_PARP14	58.2356	6.93315	0	0
Homo_sapiens_AKAP13	57.9974	5.44126	0	0
Homo_sapiens_MEF2A	57.8953	6.29579	0	0
Homo_sapiens_FNDC3B	57.8619	5.75451	0	0
Homo_sapiens_PRKAG2	57.6251	8.57084	0	0
Homo_sapiens_SLC1A3	57.499	10.9583	0	0
Homo_sapiens_DLEU2	57.3434	6.86386	0	0
Homo_sapiens_CELF2	57.2499	4.70682	0	0
Homo_sapiens_DMXL2	57.2138	11.6668	0	0
Homo_sapiens_TCF12	57.1993	5.69792	0	0
Homo_sapiens_FOXN3	56.7619	5.11959	0	0
Homo_sapiens_USP15	56.7558	5.62519	0	0
Homo_sapiens_IRAK3	56.6416	11.0248	0	0
Homo_sapiens_DOCK2	56.5376	5.2478	0	0
Homo_sapiens_TRPS1	56.3022	6.40324	0	0
Homo_sapiens_TBC1D5	56.146	5.64831	0	0
Homo_sapiens_ELMO1	56.0476	5.31448	0	0
Homo_sapiens_FTX	56.027	5.66916	0	0
Homo_sapiens_FRMD4B	55.4766	9.87996	0	0
Homo_sapiens_DENND1A	55.356	6.46039	0	0
Homo_sapiens_SIPA1L1	55.2849	5.42078	0	0
Homo_sapiens_SBF2	55.1892	8.37335	0	0
Homo_sapiens_MACF1	55.1658	5.25549	0	0
Homo_sapiens_ATG7	55.1328	6.64479	0	0
Homo_sapiens_SSH2	54.9005	5.47415	0	0
Homo_sapiens_ZSWIM6	54.7702	6.46577	0	0
Homo_sapiens_PTPRJ	54.5958	4.95464	0	0
Homo_sapiens_IQGAP2	54.5955	5.48183	0	0
Homo_sapiens_ABCA1	54.4766	10.823	0	0
Homo_sapiens_PDE4B	52.6403	7.0968	0	0
Homo_sapiens_MBNL1	52.5102	4.33033	0	0
Homo_sapiens_ITPR2	52.4325	5.97858	0	0
Homo_sapiens_VMP1	51.347	6.71527	0	0
Homo_sapiens_EIF4G3	51.3214	5.57443	0	0
Homo_sapiens_ASAP1	51.2375	6.47872	0	0
Homo_sapiens_RUNX1	51.2122	5.64249	0	0
Homo_sapiens_MED13L	51.0973	5.49492	0	0
Homo_sapiens_ARL15	51.0165	5.17606	0	0
Homo_sapiens_TUT7	50.9662	6.62367	0	0
Homo_sapiens_MARCHF1	50.9369	11.0002	0	0
Homo_sapiens_RNF130	50.9137	9.32417	0	0
Homo_sapiens_PICALM	50.0388	5.2582	0	0
Homo_sapiens_APBB1IP	50.0303	5.6365	0	0
Homo_sapiens_FNBP1	49.9205	5.26243	0	0
Homo_sapiens_FCHO2	49.9138	8.94589	0	0
Homo_sapiens_FHIT	49.8958	8.34485	0	0
Homo_sapiens_RAB31	49.8548	10.8086	0	0
Homo_sapiens_RAPGEF1	49.8041	5.17539	0	0
Homo_sapiens_CUX1	49.7707	7.59657	0	0
Homo_sapiens_EXOC4	49.5938	5.23776	0	0
Homo_sapiens_AFF1	49.4246	5.34802	0	0
Homo_sapiens_ACSL1	49.4037	9.38082	0	0
Homo_sapiens_SMAP2	49.3107	5.60516	0	0
Homo_sapiens_ARHGAP15	49.306	4.29308	0	0
Homo_sapiens_ARHGAP24	49.3046	11.1295	0	0
Homo_sapiens_ANKRD12	49.229	4.94368	0	0
Homo_sapiens_MERTK	48.6527	10.9936	0	0
Homo_sapiens_SFMBT2	48.6231	4.94495	0	0
Homo_sapiens_KANSL1	48.4878	4.52549	0	0
Homo_sapiens_MSR1	48.4497	11.501	0	0
Homo_sapiens_TPST1	48.3475	11.0552	0	0
Homo_sapiens_GRB2	48.2245	6.93604	0	0
Homo_sapiens_CMIP	48.1906	5.4385	0	0
Homo_sapiens_JMJD1C	48.0419	5.4532	0	0
Homo_sapiens_PTPRC	47.8995	4.28799	0	0
Homo_sapiens_BACH1	47.8915	6.86914	0	0

## Sheet: NC
Gene	scores	log2FC	pvals	FDR
Sus_scrofa___XKR4	22.5788	12.0125	7.00801e-113	2.56108e-108
Sus_scrofa___ZNF536	22.1452	8.36799	1.16053e-108	2.12057e-104
Sus_scrofa___CADPS2	21.1929	5.66707	1.1102e-99	1.35241e-95
Sus_scrofa___PDE1C	20.2293	5.29954	5.40437e-91	4.93757e-87
Sus_scrofa___GRIK2	19.4505	10.0519	2.88398e-84	2.1079e-80
Sus_scrofa___CHL1	19.1951	9.18196	4.0642e-82	2.47544e-78
Sus_scrofa___ENSSSCG00000046579	19.136	4.31568	1.26585e-81	6.60864e-78
Sus_scrofa___CDH19	18.9922	11.0481	1.97906e-80	9.04059e-77
Sus_scrofa___ARAP2	18.8329	5.61118	4.06299e-79	1.6498e-75
Sus_scrofa___SCN7A	18.5675	9.00962	5.89315e-77	2.15365e-73
Sus_scrofa___GRIK3	18.427	8.6331	7.98163e-76	2.65172e-72
Sus_scrofa___UTRN	18.4138	2.91999	1.01861e-75	3.10209e-72
Sus_scrofa___FRMD4A	18.3626	3.70914	2.61666e-75	7.35583e-72
Sus_scrofa___IL1RAPL2	18.0359	8.01188	1.01775e-72	2.65668e-69
Sus_scrofa___ENSSSCG00000009125	17.9598	2.8019	4.02532e-72	9.80702e-69
Sus_scrofa___CADM1	17.716	4.79123	3.15733e-70	7.21153e-67
Sus_scrofa___GRIA4	17.645	8.07121	1.11254e-69	2.39163e-66
Sus_scrofa___RBMS3	17.5365	3.17501	7.54548e-69	1.53194e-65
Sus_scrofa___DOCK1	17.2724	2.55395	7.59797e-67	1.46141e-63
Sus_scrofa___ARHGAP24	17.1616	2.617	5.15156e-66	9.41318e-63
Sus_scrofa___ANKRD44	17.0279	3.76828	5.09704e-65	8.87007e-62
Sus_scrofa___NCAM2	16.6551	8.14498	2.77896e-62	4.61622e-59
Sus_scrofa___NRXN1	16.6196	6.91297	5.029e-62	7.99064e-59
Sus_scrofa___CDK14	16.4886	2.32218	4.4309e-61	6.74697e-58
Sus_scrofa___ADAM23	16.4518	5.84896	8.13473e-61	1.18913e-57
Sus_scrofa___CNTN4	16.4412	7.68842	9.7024e-61	1.36375e-57
Sus_scrofa___DST	16.3277	1.99817	6.2715e-60	8.48859e-57
Sus_scrofa___ACAP2	16.311	2.90885	8.23834e-60	1.07525e-56
Sus_scrofa___IQGAP2	16.1946	4.31427	5.50283e-59	6.93451e-56
Sus_scrofa___GLIS3	16.1345	3.58049	1.46094e-58	1.77966e-55
Sus_scrofa___DLG2	15.9186	4.41007	4.7051e-57	5.5467e-54
Sus_scrofa___SNTB1	15.6866	4.66855	1.86729e-55	2.13251e-52
Sus_scrofa___IGSF11	15.6234	9.35802	5.04323e-55	5.58499e-52
Sus_scrofa___PAPPA	15.6132	3.94728	5.92231e-55	6.36561e-52
Sus_scrofa___ENSSSCG00000049691	15.5354	3.15092	1.99788e-54	2.08608e-51
Sus_scrofa___SLC35F1	15.4989	7.57306	3.53064e-54	3.58409e-51
Sus_scrofa___KDSR	15.4612	3.35765	6.33709e-54	6.25916e-51
Sus_scrofa___IL6ST	15.4482	2.9103	7.76159e-54	7.4644e-51
Sus_scrofa___PLPPR1	15.3662	9.01521	2.7604e-53	2.58663e-50
Sus_scrofa___GPM6B	15.2823	3.77727	1.0041e-52	9.17371e-50
Sus_scrofa___PLCE1	14.9265	5.34828	2.21549e-50	1.97476e-47
Sus_scrofa___MAML2	14.7705	2.62994	2.26884e-49	1.97416e-46
Sus_scrofa___PRKCA	14.6128	3.82655	2.32923e-48	1.97957e-45
Sus_scrofa___PLPP1	14.2588	2.97974	3.95054e-46	3.28119e-43
Sus_scrofa___FIGN	14.1316	4.37547	2.42654e-45	1.97062e-42
Sus_scrofa___NAV2	14.1019	2.3875	3.69909e-45	2.93877e-42
Sus_scrofa___PTPRJ	14.0827	3.62566	4.85474e-45	3.77482e-42
Sus_scrofa___DIP2B	14.0661	2.64529	6.13835e-45	4.67346e-42
Sus_scrofa___SOX5	14.0034	2.57832	1.48565e-44	1.10802e-41
Sus_scrofa___BCAS3	13.9865	2.33767	1.8851e-44	1.37782e-41
Sus_scrofa___CADM2	13.6322	6.09558	2.57608e-42	1.84594e-39
Sus_scrofa___PEAK1	13.272	2.11335	3.36608e-40	2.36564e-37
Sus_scrofa___NRIP1	13.1222	3.44219	2.45589e-39	1.66205e-36
Sus_scrofa___ALCAM	13.0691	3.4946	4.94285e-39	3.2843e-36
Sus_scrofa___ENSSSCG00000015814	12.9383	2.44321	2.73711e-38	1.78621e-35
Sus_scrofa___ENSSSCG00000010212	12.9104	2.1555	3.9314e-38	2.52058e-35
Sus_scrofa___ERBIN	12.7708	2.18496	2.38571e-37	1.5032e-34
Sus_scrofa___LRRTM4	12.5028	7.63686	7.20547e-36	4.38873e-33
Sus_scrofa___PLEKHG1	12.4774	2.9725	9.91862e-36	5.94223e-33
Sus_scrofa___TMTC2	12.4586	2.63159	1.25501e-35	7.39745e-33
Sus_scrofa___DNER	12.4321	7.02378	1.74941e-35	1.0148e-32
Sus_scrofa___INSC	12.4095	7.15943	2.32121e-35	1.32544e-32
Sus_scrofa___NKAIN2	12.4061	5.9132	2.42105e-35	1.36119e-32
Sus_scrofa___PTPN13	12.389	2.60808	2.99645e-35	1.65917e-32
Sus_scrofa___SNCA	12.1736	9.33005	4.29472e-34	2.34255e-31
Sus_scrofa___ZEB2	12.161	2.28227	5.0121e-34	2.69364e-31
Sus_scrofa___NEDD4L	12.0854	2.47918	1.26227e-33	6.68546e-31
Sus_scrofa___RASGEF1C	12.0485	6.24131	1.97492e-33	1.03105e-30
Sus_scrofa___ITGB8	12.0471	3.60044	2.00906e-33	1.0341e-30
Sus_scrofa___DLC1	11.9614	1.58351	5.65684e-33	2.79364e-30
Sus_scrofa___PDE7B	11.9131	2.55807	1.01092e-32	4.92585e-30
Sus_scrofa___ZEB1	11.8085	1.65172	3.52742e-32	1.69618e-29
Sus_scrofa___AUTS2	11.7964	1.92299	4.07458e-32	1.93384e-29
Sus_scrofa___LRMDA	11.7899	2.02147	4.40091e-32	2.06194e-29
Sus_scrofa___ITGA2B	11.7166	2.28324	1.04811e-31	4.84851e-29
Sus_scrofa___CYP7B1	11.6008	3.64499	4.08421e-31	1.86572e-28
Sus_scrofa___MATN2	11.5587	3.70512	6.67327e-31	3.0108e-28
Sus_scrofa___GALNT18	11.4411	3.813	2.60529e-30	1.1611e-27
Sus_scrofa___ADAMTS20	11.3778	4.18941	5.39343e-30	2.31886e-27
Sus_scrofa___PCDH9	11.3689	3.53059	5.97305e-30	2.5382e-27
Sus_scrofa___GFRA1	11.3223	5.57432	1.01714e-29	4.27259e-27
Sus_scrofa___ARHGAP31	11.3194	3.06728	1.05142e-29	4.36639e-27
Sus_scrofa___OXR1	11.2944	3.21225	1.39893e-29	5.74427e-27
Sus_scrofa___RUNX2	11.2447	4.32095	2.45933e-29	9.76916e-27
Sus_scrofa___BACH2	11.0605	2.45113	1.94927e-28	7.65979e-26
Sus_scrofa___ANTXR2	10.914	1.99294	9.88245e-28	3.80162e-25
Sus_scrofa___ARHGEF26	10.6775	3.71129	1.29649e-26	4.88455e-24
Sus_scrofa___EPHA5	10.6671	8.24038	1.45064e-26	5.40955e-24
Sus_scrofa___P3H2	10.6651	3.95003	1.48262e-26	5.47298e-24
Sus_scrofa___PLCB1	10.4589	1.84264	1.33419e-25	4.8665e-23
Sus_scrofa___ENSSSCG00000033643	10.4463	9.27562	1.52379e-25	5.45951e-23
Sus_scrofa___ZBTB20	10.3884	1.19972	2.79867e-25	9.92984e-23
Sus_scrofa___AGAP1	10.3196	1.43114	5.74509e-25	1.99957e-22
Sus_scrofa___CORO2B	10.2888	3.57282	7.91214e-25	2.70233e-22
Sus_scrofa___ZSWIM6	10.2869	1.8382	8.07683e-25	2.73304e-22
Sus_scrofa___PIP4K2A	10.1525	2.58174	3.22892e-24	1.06307e-21
Sus_scrofa___ADGRG6	10.0735	3.83951	7.23522e-24	2.33992e-21
Sus_scrofa___SEMA6D	9.75263	4.00947	1.79753e-22	5.42898e-20
Sus_scrofa___CNKSR2	9.7325	2.85995	2.19143e-22	6.51105e-20
Sus_scrofa___TMEM178B	9.7227	4.62078	2.41295e-22	7.11141e-20

## Sheet: Pericytes
Gene	scores	log2FC	pvals	FDR
Sus_scrofa___EPS8	45.8214	5.26231	0	0
Sus_scrofa___CPM	44.9708	5.92392	0	0
Sus_scrofa___PRKG1	44.3189	4.10577	0	0
Sus_scrofa___MAST4	43.7891	3.49717	0	0
Sus_scrofa___PDE1C	42.8632	6.62245	0	0
Sus_scrofa___CALD1	41.4439	3.55156	0	0
Sus_scrofa___GJC1	41.0464	6.15967	0	0
Sus_scrofa___GUCY1A2	40.8311	8.31936	0	0
Sus_scrofa___SOX5	39.5879	3.92611	0	0
Sus_scrofa___IGFBP7	39.3289	4.35389	0	0
Sus_scrofa___MYO1B	39.085	4.73806	0	0
Sus_scrofa___DLC1	38.8823	2.62673	0	0
Sus_scrofa___ADAMTS12	38.8463	4.79622	0	0
Sus_scrofa___PDE10A	37.9267	4.62237	0	0
Sus_scrofa___EBF1	36.3632	3.63254	1.62634e-289	3.9623e-286
Sus_scrofa___ITPR1	36.3021	4.22908	1.49733e-288	3.42e-285
Sus_scrofa___RBMS3	36.0575	3.22255	1.05154e-284	2.26049e-281
Sus_scrofa___EBF2	35.8284	3.89961	3.99139e-281	8.10364e-278
Sus_scrofa___EGFLAM	35.6355	5.56144	3.95023e-278	7.59795e-275
Sus_scrofa___FRMD3	34.6172	4.40075	1.39496e-262	2.54894e-259
Sus_scrofa___RGS5	34.6053	8.67905	2.10614e-262	3.66519e-259
Sus_scrofa___PDGFRB	34.5684	5.2014	7.5558e-262	1.25512e-258
Sus_scrofa___EDNRB	33.7293	7.18172	2.14923e-249	3.41493e-246
Sus_scrofa___NRP1	32.9432	2.93163	5.30118e-238	8.07216e-235
Sus_scrofa___PELI2	32.8261	3.22682	2.49732e-236	3.65059e-233
Sus_scrofa___STK39	32.7232	3.82255	7.30486e-235	1.02675e-231
Sus_scrofa___PHACTR2	31.65	3.09137	7.59389e-220	1.02785e-216
Sus_scrofa___CYTH3	31.2045	2.97702	9.26838e-214	1.20969e-210
Sus_scrofa___IL1RAP	31.0069	4.25494	4.345e-211	5.47545e-208
Sus_scrofa___FRMD4A	30.8888	3.03648	1.68639e-209	2.0543e-206
Sus_scrofa___ENSSSCG00000044700	30.0527	2.37436	2.011e-198	2.37071e-195
Sus_scrofa___SULF1	28.1427	2.96597	2.94334e-174	3.25953e-171
Sus_scrofa___PLSCR4	27.7276	2.70653	3.25043e-169	3.39392e-166
Sus_scrofa___SEMA5A	27.584	2.54705	1.73115e-167	1.75736e-164
Sus_scrofa___LHFPL6	27.4816	2.603	2.91413e-166	2.87829e-163
Sus_scrofa___ITGA1	27.2841	3.87263	6.54623e-164	6.29557e-161
Sus_scrofa___FARP1	27.1687	2.7906	1.52287e-162	1.42701e-159
Sus_scrofa___DAAM2	27.0525	3.98131	3.56504e-161	3.25711e-158
Sus_scrofa___RASAL2	26.9163	2.41201	1.41482e-159	1.26109e-156
Sus_scrofa___KCNJ8	26.8851	4.08887	3.28202e-159	2.85575e-156
Sus_scrofa___KIT	26.2449	3.10836	8.16568e-152	6.93988e-149
Sus_scrofa___GUCY1B1	26.1437	5.28769	1.16267e-150	9.6568e-148
Sus_scrofa___ITIH5	26.0662	3.03968	8.80623e-150	7.15164e-147
Sus_scrofa___ARHGAP42	26.0463	2.91368	1.48304e-149	1.17821e-146
Sus_scrofa___P3H2	25.7718	4.44512	1.83599e-146	1.42758e-143
Sus_scrofa___ENSSSCG00000032383	25.5215	4.93736	1.13753e-143	8.4839e-141
Sus_scrofa___TTC7B	25.4819	2.29508	3.12673e-143	2.28533e-140
Sus_scrofa___GRM7	25.0898	7.06697	6.42626e-139	4.60485e-136
Sus_scrofa___C3orf70	24.8999	3.87377	7.45458e-137	5.23899e-134
Sus_scrofa___SLC12A2	24.7157	3.7728	7.24726e-135	4.99719e-132
Sus_scrofa___PTPN13	24.6833	2.5463	1.61607e-134	1.09369e-131
Sus_scrofa___TRPC6	24.637	7.09626	5.06781e-134	3.36733e-131
Sus_scrofa___AKT3	24.5906	2.08064	1.59187e-133	1.03884e-130
Sus_scrofa___ARHGAP10	24.3467	1.65357	6.28747e-131	4.03115e-128
Sus_scrofa___COL4A2	24.2183	1.75965	1.42632e-129	8.98704e-127
Sus_scrofa___TPM1	24.2067	1.98959	1.89037e-129	1.17091e-126
Sus_scrofa___ARHGAP6	24.1825	3.10139	3.39692e-129	2.06901e-126
Sus_scrofa___ZEB2	24.1594	2.16682	5.95125e-129	3.56539e-126
Sus_scrofa___COL5A3	24.101	3.32949	2.44273e-128	1.43983e-125
Sus_scrofa___KIRREL1	24.0276	3.49012	1.43215e-127	8.30761e-125
Sus_scrofa___PLCL1	23.8964	2.57021	3.34164e-126	1.90813e-123
Sus_scrofa___GUCY1A1	23.8109	4.50912	2.57591e-125	1.44825e-122
Sus_scrofa___C7	23.7053	4.28052	3.17793e-124	1.75966e-121
Sus_scrofa___ENSSSCG00000009338	23.4377	1.73855	1.7667e-121	9.63644e-119
Sus_scrofa___LDB2	23.4219	2.26533	2.55537e-121	1.37332e-118
Sus_scrofa___MRTFA	23.3474	2.46585	1.46484e-120	7.75834e-118
Sus_scrofa___LTBP1	23.0143	2.2236	3.35091e-117	1.72478e-114
Sus_scrofa___CAMK1D	22.8894	3.68723	5.92294e-116	3.0063e-113
Sus_scrofa___SASH1	22.7129	2.01141	3.34378e-114	1.62931e-111
Sus_scrofa___ADGRF5	22.2812	3.15654	5.62825e-110	2.63698e-107
Sus_scrofa___STUM	22.2513	7.45281	1.09607e-109	5.07034e-107
Sus_scrofa___NCALD	22.1065	3.824	2.73545e-108	1.24959e-105
Sus_scrofa___ARAP2	22.0112	3.78666	2.24932e-107	1.00245e-104
Sus_scrofa___ADAMTS9	21.9135	2.39963	1.93026e-106	8.49896e-104
Sus_scrofa___ARHGAP24	21.5849	1.55507	2.49041e-103	1.05828e-100
Sus_scrofa___PID1	21.579	1.99673	2.82823e-103	1.18802e-100
Sus_scrofa___LDLRAD4	21.5235	3.04325	9.38055e-103	3.85182e-100
Sus_scrofa___MAML2	21.3755	1.67859	2.25757e-101	9.16698e-99
Sus_scrofa___SLC7A2	21.3322	3.51316	5.70303e-101	2.2903e-98
Sus_scrofa___NR2F2	21.2484	6.02645	3.41387e-100	1.34151e-97
Sus_scrofa___PGM5	21.1074	3.18836	6.79848e-99	2.61527e-96
Sus_scrofa___EXT1	20.9974	1.53776	6.92123e-98	2.55491e-95
Sus_scrofa___PAWR	20.9941	4.35572	7.42929e-98	2.71503e-95
Sus_scrofa___PPP1R12A	20.6882	1.31683	4.42769e-95	1.58637e-92
Sus_scrofa___ENSSSCG00000010440	20.6766	1.93282	5.62499e-95	1.99578e-92
Sus_scrofa___MAGI1	20.626	1.76325	1.6026e-94	5.63143e-92
Sus_scrofa___TNFRSF21	20.5786	4.74657	4.26786e-94	1.48542e-91
Sus_scrofa___CDC42BPA	20.5629	1.48501	5.9055e-94	2.036e-91
Sus_scrofa___ENSSSCG00000016119	20.456	2.41926	5.31547e-93	1.81546e-90
Sus_scrofa___PEAR1	20.3111	3.3277	1.02566e-91	3.4388e-89
Sus_scrofa___AGAP1	20.1994	1.23841	9.90621e-91	3.26146e-88
Sus_scrofa___PHLPP1	20.1765	2.28636	1.57661e-90	5.1444e-88
Sus_scrofa___RASGEF1B	20.1749	3.05789	1.62576e-90	5.25784e-88
Sus_scrofa___PDE1A	20.091	2.20967	8.84753e-90	2.83626e-87
Sus_scrofa___DIAPH2	19.8574	1.08812	9.5196e-88	2.87515e-85
Sus_scrofa___CYP20A1	19.7695	1.55144	5.44714e-87	1.61842e-84
Sus_scrofa___FNDC3A	19.6366	1.61217	7.53125e-86	2.21959e-83
Sus_scrofa___ADGRV1	19.5681	5.74202	2.89056e-85	8.45083e-83
Sus_scrofa___ENSSSCG00000022925	19.4754	2.23679	1.77431e-84	5.1462e-82
Sus_scrofa___MAP4K4	19.4734	1.81585	1.84766e-84	5.31674e-82

[truncated: 1 more sheets: SMC]
