# Supplementary material for: Integrated Molecular Profiling of Preclinical and Clinical Cardiac Xenotransplants
Source: Research Square preprint supplement (doi:10.21203/rs.3.rs-8406985/v1), 2026-02-04
Supplement: Supplementary file 49 [file f3ff7319964ee8596d5e1425.xlsx]

## Sheet: CM
gene	Species	p_val	avg_log2FC	pct. 1	pct.2	p_val_adj	level
ISG12(A)	Pig	0	10.9943	642	2	0	Up-regulated
IFI44	Pig	0	5.42792	696	56	0	Up-regulated
EIF2AK2	Pig	0	4.30496	792	162	0	Up-regulated
ENSSSCG00000034570	Pig	0	13.1249	625	0	0	Up-regulated
IFI44L	Pig	0	5.26751	652	66	0	Up-regulated
ISG15	Pig	1.97571e-299	9.3919	573	4	7.22023e-295	Up-regulated
ENSSSCG00000001229	Pig	2.30246e-292	9.23053	562	4	8.41434e-288	Up-regulated
B2M	Pig	1.11398e-267	4.08013	634	0.13	4.07103e-263	Up-regulated
MYL2	Pig	1.39099e-255	2.52256	847	603	5.08337e-251	Up-regulated
HDAC9	Pig	8.87235e-254	1.64126	917	751	3.2424e-249	Up-regulated
IFIT1	Pig	5.11276e-238	6.94084	498	17	1.86846e-233	Up-regulated
PSME4	Pig	2.52347e-234	1.51849	892	0.77	9.22201e-230	Up-regulated
ENSSSCG00000027046	Pig	8.74706e-234	7.28265	481	6	3.19661e-229	Up-regulated
STAT1	Pig	1.48975e-231	2.83422	693	267	5.44428e-227	Up-regulated
RSAD2	Pig	9.4916e-219	12.3713	448	0	3.4687e-214	Up-regulated
HERC6	Pig	3.68779e-215	5.99181	0.47	21	1.3477e-210	Up-regulated
OAS2	Pig	1.48793e-183	5.51416	428	28	5.43763e-179	Up-regulated
IFIH1	Pig	1.51434e-182	4.18922	473	65	5.53414e-178	Up-regulated
SERPINE1	Pig	4.67409e-179	2.29744	689	297	1.70815e-174	Up-regulated
DDX60	Pig	3.54846e-174	8.92456	377	2	1.29679e-169	Up-regulated
MX1	Pig	1.19847e-171	8.81762	371	1	4.37981e-167	Up-regulated
PARD3B	Pig	2.61679e-171	1.06062	939	888	9.56306e-167	Up-regulated
PARP12	Pig	9.64261e-170	5.30304	0.39	15	3.52389e-165	Up-regulated
CSRP3	Pig	6.3998e-165	1.67877	811	554	2.33881e-160	Up-regulated
SGMS1	Pig	3.19637e-161	1.31709	0.87	752	1.16811e-156	Up-regulated
CDC14A	Pig	6.16663e-159	1.95967	747	488	2.25359e-154	Up-regulated
ENSSSCG00000021656	Pig	3.01406e-146	2.83215	588	0.25	1.10149e-141	Up-regulated
MYOT	Pig	2.50177e-143	1.67509	742	501	9.14273e-139	Up-regulated
ROCK2	Pig	3.32639e-141	1.41508	862	771	1.21563e-136	Up-regulated
PDE4DIP	Pig	9.13319e-131	0.688669	0.97	963	3.33772e-126	Up-regulated
DGKI	Pig	5.91138e-128	4.30775	359	44	2.16031e-123	Up-regulated
MYOZ2	Pig	2.20468e-121	0.883874	917	908	8.057e-117	Up-regulated
ZFY	Pig	5.90563e-119	10.0808	271	1	2.15821e-114	Up-regulated
USP18	Pig	1.03922e-118	4.25071	324	31	3.79784e-114	Up-regulated
SGCD	Pig	3.62563e-112	0.989541	915	839	1.32499e-107	Up-regulated
FBXO39	Pig	4.6517e-106	1.4631	0.64	347	1.69997e-101	Up-regulated
TRDN	Pig	7.51481e-105	1.25765	813	755	2.74629e-100	Up-regulated
TNNC1	Pig	1.0993e-102	2.01739	631	416	4.01738e-98	Up-regulated
NRAP	Pig	7.40482e-101	0.791789	949	927	2.70609e-96	Up-regulated
HSPB3	Pig	3.15431e-97	2.15868	516	253	1.15274e-92	Up-regulated
XIRP2	Pig	9.50044e-96	2.20438	575	315	3.47194e-91	Up-regulated
ENSSSCG00000026430	Pig	1.28329e-95	8.11622	225	1	4.68978e-91	Up-regulated
FILIP1	Pig	4.09024e-92	0.82876	912	844	1.49478e-87	Up-regulated
TXNIP	Pig	6.05737e-91	1.33408	573	297	2.21367e-86	Up-regulated
SSBP2	Pig	1.31316e-90	0.734156	921	909	4.79893e-86	Up-regulated
ENSSSCG00000025253	Pig	9.8918e-89	6.60387	218	5	3.61496e-84	Up-regulated
TRANK1	Pig	1.81719e-88	3.67377	278	39	6.64091e-84	Up-regulated
FAM189A2	Pig	5.47796e-88	1.21409	743	597	2.00192e-83	Up-regulated
ASB18	Pig	8.95409e-87	2.43095	405	143	3.27227e-82	Up-regulated
FKBP5	Pig	8.52813e-85	0.771946	873	815	3.11661e-80	Up-regulated
CREB5	Pig	2.13472e-84	1.54756	665	464	7.80133e-80	Up-regulated
UBE2E2	Pig	1.22997e-83	0.801492	913	884	4.49491e-79	Up-regulated
RPLP1	Pig	7.58362e-83	2.90995	333	0.09	2.77143e-78	Up-regulated
DGKH	Pig	3.67521e-82	1.30407	719	571	1.3431e-77	Up-regulated
ENSSSCG00000017146	Pig	5.80152e-82	2.69873	375	128	2.12017e-77	Up-regulated
CRYAB	Pig	1.76544e-79	0.841483	887	861	6.45182e-75	Up-regulated
MAP4	Pig	3.61867e-79	0.826478	893	865	1.32244e-74	Up-regulated
CMPK2	Pig	8.74897e-79	7.84199	0.19	2	3.19731e-74	Up-regulated
IFIT5	Pig	3.86565e-77	3.26757	277	56	1.4127e-72	Up-regulated
ENSSSCG00000033786	Pig	3.81083e-76	1.46432	649	0.48	1.39267e-71	Up-regulated
TCAP	Pig	3.75045e-75	0.736631	864	811	1.3706e-70	Up-regulated
USP25	Pig	7.91721e-75	0.810973	846	826	2.89334e-70	Up-regulated
PALM2AKAP2	Pig	1.15354e-74	1.09067	768	638	4.21562e-70	Up-regulated
TLL2	Pig	1.18371e-74	4.25319	224	24	4.32585e-70	Up-regulated
HERC5	Pig	2.26211e-74	8.95878	178	1	8.26689e-70	Up-regulated
VCL	Pig	5.62993e-74	0.779941	868	847	2.05746e-69	Up-regulated
RHOQ	Pig	6.33292e-72	1.38709	623	436	2.31437e-67	Up-regulated
NLRC5	Pig	8.85014e-71	3.13272	291	74	3.23428e-66	Up-regulated
FOXS1	Pig	4.59327e-70	10.1277	168	0	1.67861e-65	Up-regulated
PCP4	Pig	5.81429e-70	1.51091	577	0.36	2.12483e-65	Up-regulated
PML	Pig	6.39956e-70	3.42272	226	0.03	2.33872e-65	Up-regulated
CTNNA3	Pig	7.08414e-70	0.560705	965	0.94	2.5889e-65	Up-regulated
TESC	Pig	1.07507e-68	1.38107	625	454	3.92886e-64	Up-regulated
BST2	Pig	7.72181e-68	9.42357	163	0	2.82194e-63	Up-regulated
ENSSSCG00000014540	Pig	2.24076e-67	2.38332	364	145	8.18886e-63	Up-regulated
ROBO1	Pig	2.43274e-66	2.25179	369	151	8.89044e-62	Up-regulated
FGD6	Pig	1.37384e-65	1.77011	523	324	5.02068e-61	Up-regulated
LMNTD1	Pig	4.92369e-65	1.21818	711	588	1.79936e-60	Up-regulated
CALD1	Pig	4.28677e-64	1.20839	673	495	1.5666e-59	Up-regulated
IL10RA	Pig	4.36658e-64	2.97672	251	54	1.59577e-59	Up-regulated
NUDCD1	Pig	1.06159e-63	2.29182	378	163	3.87959e-59	Up-regulated
MAML2	Pig	1.76567e-63	2.14423	403	186	6.45265e-59	Up-regulated
PPP1R12B	Pig	4.91779e-63	0.661388	919	897	1.7972e-58	Up-regulated
TENM3	Pig	8.52925e-63	1.215	0.68	567	3.11702e-58	Up-regulated
ATP2B4	Pig	9.98646e-63	1.00881	759	661	3.64955e-58	Up-regulated
ATAD1	Pig	1.90612e-62	0.830037	804	756	6.9659e-58	Up-regulated
TBC1D8	Pig	2.59624e-62	0.654245	0.91	857	9.48794e-58	Up-regulated
SPTBN1	Pig	6.73853e-62	0.500185	0.93	919	2.46259e-57	Up-regulated
GRAMD2B	Pig	1.05228e-61	0.868896	815	732	3.84556e-57	Up-regulated
PPFIA4	Pig	7.33644e-61	1.20009	689	579	2.6811e-56	Up-regulated
HSPB1	Pig	8.69652e-61	1.40251	661	0.53	3.17814e-56	Up-regulated
LRRTM3	Pig	3.37662e-60	1.63826	616	506	1.23398e-55	Up-regulated
GPNMB	Pig	3.43501e-60	1.96303	437	237	1.25532e-55	Up-regulated
GLB1	Pig	6.66594e-60	1.32752	632	487	2.43607e-55	Up-regulated
IL34	Pig	2.21285e-59	1.7954	477	281	8.08685e-55	Up-regulated
CCDC180	Pig	6.13705e-59	2.50953	297	98	2.24279e-54	Up-regulated
IFIT2	Pig	9.28588e-59	4.83596	176	17	3.39353e-54	Up-regulated
PALLD	Pig	1.42835e-58	0.876666	856	785	5.2199e-54	Up-regulated
ITIH4	Pig	1.39268e-57	4.82159	178	0.02	5.08956e-53	Up-regulated
MX2	Pig	2.92945e-57	10.3062	139	0	1.07057e-52	Up-regulated
MBNL1	Pig	5.2398e-57	0.625774	893	888	1.91488e-52	Up-regulated
GCNT3	Pig	1.15728e-56	2.58729	263	76	4.22927e-52	Up-regulated
LRRFIP2	Pig	1.60023e-56	0.625055	864	888	5.84805e-52	Up-regulated
CMAH	Pig	2.01569e-55	8.36551	136	1	7.36633e-51	Up-regulated
PDE7B	Pig	4.24685e-55	5.47859	0.15	8	1.55201e-50	Up-regulated
FBXW8	Pig	4.92559e-55	1.10058	0.69	611	1.80006e-50	Up-regulated
ENSSSCG00000003079	Pig	6.77893e-55	3.02449	278	93	2.47736e-50	Up-regulated
RPS20	Pig	2.43775e-54	3.32067	209	43	8.90874e-50	Up-regulated
MYL12A	Pig	1.86151e-53	2.40851	0.28	97	6.80287e-49	Up-regulated
ENSSSCG00000038249	Pig	3.25994e-53	6.86903	134	2	1.19134e-48	Up-regulated
ZNFX1	Pig	1.14265e-52	2.63519	231	0.06	4.17581e-48	Up-regulated
DAG1	Pig	3.15002e-52	1.19411	637	523	1.15118e-47	Up-regulated
ATP8A1	Pig	4.91863e-52	1.18739	623	475	1.79751e-47	Up-regulated
RNF115	Pig	1.1329e-51	1.08593	684	599	4.14019e-47	Up-regulated
GNPDA2	Pig	2.29981e-51	1.58002	494	334	8.40467e-47	Up-regulated
ENSSSCG00000034015	Pig	7.16109e-51	1.82894	0.4	206	2.61702e-46	Up-regulated
ENSSSCG00000012178	Pig	1.91716e-50	5.29285	134	5	7.00625e-46	Up-regulated
DDX5	Pig	3.10307e-50	0.699926	825	823	1.13402e-45	Up-regulated
MYPN	Pig	7.08059e-50	1.08326	642	511	2.5876e-45	Up-regulated
EPB41L3	Pig	1.49741e-49	0.637096	883	817	5.47229e-45	Up-regulated
CLU	Pig	4.80036e-49	4.89977	133	6	1.75429e-44	Up-regulated
PSMF1	Pig	1.46553e-48	1.5376	433	253	5.35579e-44	Up-regulated
PLXNA2	Pig	1.92824e-48	2.01747	348	171	7.04674e-44	Up-regulated
ENSSSCG00000031661	Pig	7.47758e-48	2.90148	249	83	2.73268e-43	Up-regulated
NAALAD2	Pig	1.81461e-47	2.14389	319	0.14	6.6315e-43	Up-regulated
ENSSSCG00000015747	Pig	7.30289e-47	1.21641	471	278	2.66884e-42	Up-regulated
PTP4A2	Pig	1.92863e-46	0.804645	756	713	7.04818e-42	Up-regulated
TRIM63	Pig	3.18173e-46	1.42587	513	361	1.16276e-41	Up-regulated
PARP9	Pig	4.92311e-46	4.80293	128	7	1.79915e-41	Up-regulated
DTX3L	Pig	5.35832e-46	7.08013	115	1	1.9582e-41	Up-regulated
RPL10	Pig	1.2861e-45	1.91254	325	0.15	4.70005e-41	Up-regulated
CLIP1	Pig	4.83117e-45	0.688617	801	782	1.76555e-40	Up-regulated
RPLP0	Pig	1.73358e-43	2.58721	206	58	6.33536e-39	Up-regulated
AHR	Pig	1.98766e-43	1.76026	378	211	7.26391e-39	Up-regulated
ENSSSCG00000037509	Pig	2.09e-43	7.41521	107	1	7.63792e-39	Up-regulated
TXLNB	Pig	2.16238e-43	1.00701	657	566	7.90242e-39	Up-regulated
DENND5B	Pig	4.51264e-43	0.580139	922	915	1.64914e-38	Up-regulated
MAP3K20	Pig	5.4632e-43	1.01012	739	664	1.99653e-38	Up-regulated
ATP5IF1	Pig	6.55191e-43	2.25091	263	102	2.3944e-38	Up-regulated
SLC38A2	Pig	1.21452e-42	1.28025	528	0.4	4.43848e-38	Up-regulated
RPS2	Pig	5.17045e-42	2.08236	282	121	1.88954e-37	Up-regulated
RAPGEF2	Pig	5.60306e-42	0.631617	0.83	783	2.04764e-37	Up-regulated
TRIM54	Pig	1.91384e-41	0.932521	696	609	6.99414e-37	Up-regulated
ANKRD2	Pig	1.00309e-40	2.58635	208	62	3.6658e-36	Up-regulated
SLC39A10	Pig	1.4026e-40	1.70218	364	0.2	5.12581e-36	Up-regulated
TRIM21	Pig	2.07669e-40	4.10961	127	13	7.58926e-36	Up-regulated
ZNF106	Pig	3.67201e-40	0.773553	741	697	1.34194e-35	Up-regulated
ENSSSCG00000028850	Pig	4.39287e-40	2.84491	177	43	1.60537e-35	Up-regulated
TSEN2	Pig	5.60247e-40	2.55597	281	0.13	2.04742e-35	Up-regulated
SLC1A2	Pig	6.16018e-40	1.39005	509	381	2.25124e-35	Up-regulated
GADD45G	Pig	8.94193e-40	0.988794	555	386	3.26783e-35	Up-regulated
CERS6	Pig	2.04934e-39	2.57164	192	54	7.48931e-35	Up-regulated
CHCHD10	Pig	2.51469e-39	1.21828	489	339	9.18993e-35	Up-regulated
PLSCR1	Pig	4.68681e-39	2.51812	167	38	1.71279e-34	Up-regulated
ATP5MC1	Pig	8.44403e-39	1.52084	384	225	3.08587e-34	Up-regulated
AZIN1	Pig	1.25482e-38	1.79694	366	211	4.58574e-34	Up-regulated
LRMDA	Pig	3.13723e-38	1.25748	403	236	1.1465e-33	Up-regulated
CKM	Pig	8.02741e-38	1.40662	494	363	2.93362e-33	Up-regulated
RPS12	Pig	9.4635e-38	2.74354	155	33	3.45843e-33	Up-regulated
ENSSSCG00000050955	Pig	3.32438e-37	2.09304	0.25	102	1.21489e-32	Up-regulated
ENSSSCG00000016646	Pig	8.25318e-37	1.21049	0.51	381	3.01612e-32	Up-regulated
ENSSSCG00000012427	Pig	1.63319e-36	2.97367	163	41	5.9685e-32	Up-regulated
TUT4	Pig	1.78516e-36	0.561158	853	857	6.52389e-32	Up-regulated
KLHL3	Pig	2.29797e-36	1.34901	455	322	8.39794e-32	Up-regulated
NDRG4	Pig	1.13874e-35	1.29273	491	349	4.16151e-31	Up-regulated
MAP1B	Pig	4.765e-35	0.656261	751	655	1.74137e-30	Up-regulated
ENSSSCG00000035811	Pig	8.26897e-35	2.93447	156	38	3.0219e-30	Up-regulated
SETX	Pig	2.02991e-34	1.65348	339	198	7.41831e-30	Up-regulated
HSPA8	Pig	4.57539e-34	2.04479	213	79	1.67208e-29	Up-regulated
TTC39A	Pig	9.10458e-34	3.01378	148	34	3.32727e-29	Up-regulated
ENSSSCG00000010190	Pig	9.17303e-34	0.982642	749	733	3.35228e-29	Up-regulated
LGALS1	Pig	9.60197e-34	1.75499	269	128	3.50904e-29	Up-regulated
ZC3HAV1	Pig	1.28978e-33	2.69514	158	41	4.71349e-29	Up-regulated
COX5B	Pig	7.82151e-33	1.77888	271	0.13	2.85837e-28	Up-regulated
ADAR	Pig	1.19215e-32	1.6626	268	127	4.35673e-28	Up-regulated
ENSSSCG00000013906	Pig	7.60492e-32	2.43521	187	66	2.77922e-27	Up-regulated
RETREG1	Pig	1.01612e-31	0.510786	806	0.76	3.71342e-27	Up-regulated
ENSSSCG00000017509	Pig	1.77731e-31	3.03479	131	28	6.49516e-27	Up-regulated
ENSSSCG00000004207	Pig	2.6143e-31	0.836402	608	0.5	9.55398e-27	Up-regulated
RPS27A	Pig	2.71435e-31	1.84098	244	112	9.91958e-27	Up-regulated
SPON1	Pig	4.7885e-31	1.55553	294	155	1.74996e-26	Up-regulated
RPL24	Pig	4.79188e-31	1.8446	267	134	1.75119e-26	Up-regulated
CRY2	Pig	5.80162e-31	1.49416	372	238	2.1202e-26	Up-regulated
MKLN1	Pig	6.46924e-31	0.522831	819	838	2.36418e-26	Up-regulated
DZIP3	Pig	1.06342e-30	1.03865	533	433	3.88626e-26	Up-regulated
RAPGEF5	Pig	1.3231e-30	1.01973	594	517	4.83526e-26	Up-regulated
RPS28	Pig	1.45099e-30	2.0625	231	103	5.30266e-26	Up-regulated
ENSSSCG00000016263	Pig	6.75395e-30	5.44702	75	1	2.46823e-25	Up-regulated
SMPX	Pig	8.34137e-30	0.917664	595	503	3.04835e-25	Up-regulated
CD47	Pig	1.97785e-29	1.17916	426	301	7.22806e-25	Up-regulated
ARHGAP10	Pig	2.10237e-29	0.624535	0.79	745	7.68313e-25	Up-regulated
HOMER2	Pig	3.06689e-29	0.987048	0.6	518	1.1208e-24	Up-regulated
GAPDH	Pig	1.47968e-28	0.93005	701	684	5.40748e-24	Up-regulated
APPL2	Pig	1.69862e-28	1.109	489	387	6.20762e-24	Up-regulated
TOB2	Pig	3.03989e-28	1.52764	329	198	1.11093e-23	Up-regulated
ABRA	Pig	4.30346e-28	0.989108	491	359	1.5727e-23	Up-regulated
CCDC112	Pig	4.38681e-28	0.977086	585	0.51	1.60316e-23	Up-regulated
SERPINB2	Pig	5.0458e-28	1.18043	233	103	1.84399e-23	Up-regulated
FBXW7	Pig	6.6446e-28	0.520125	841	0.86	2.42827e-23	Up-regulated
RPL29	Pig	1.03441e-27	2.18741	175	65	3.78026e-23	Up-regulated
ENSSSCG00000024974	Pig	1.32384e-27	1.745	205	88	4.83797e-23	Up-regulated
PLEKHA4	Pig	2.97891e-27	3.44408	105	18	1.08864e-22	Up-regulated
GYG1	Pig	3.35718e-27	1.40068	391	274	1.22688e-22	Up-regulated
SNX24	Pig	9.16531e-27	0.892674	576	488	3.34946e-22	Up-regulated
SERF2	Human	1.05514e-26	5.3188	73	4	3.856e-22	Up-regulated
TMEM182	Pig	1.08001e-26	0.590762	732	685	3.94688e-22	Up-regulated
ENSSSCG00000000207	Pig	1.09213e-26	3.00533	121	0.03	3.9912e-22	Up-regulated
RPL23	Pig	1.25869e-26	2.08344	183	73	4.59989e-22	Up-regulated
RRP15	Pig	1.27974e-26	1.18935	451	345	4.67681e-22	Up-regulated
LARGE1	Pig	3.65882e-26	0.510922	942	919	1.33711e-21	Up-regulated
ENSSSCG00000033310	Pig	8.66198e-26	1.1749	345	215	3.16552e-21	Up-regulated
PHACTR1	Pig	9.95814e-26	0.73279	635	533	3.6392e-21	Up-regulated
RPS11	Pig	1.12048e-25	2.9269	119	0.03	4.09481e-21	Up-regulated
PTP4A1	Pig	1.12458e-25	1.77358	224	107	4.10979e-21	Up-regulated
RPL7	Pig	1.48088e-25	2.58996	114	26	5.41189e-21	Up-regulated
ENSSSCG00000004578	Pig	3.86459e-25	1.81417	224	111	1.41231e-20	Up-regulated
TTLL11	Pig	4.45633e-25	1.35689	336	208	1.62856e-20	Up-regulated
PSMB9	Pig	5.23399e-25	5.02736	64	1	1.91276e-20	Up-regulated
ENSSSCG00000021374	Pig	5.45848e-25	1.4329	298	176	1.9948e-20	Up-regulated
MGST3	Pig	7.58425e-25	1.43755	285	163	2.77166e-20	Up-regulated
BAG3	Pig	8.2346e-25	0.764934	635	581	3.00933e-20	Up-regulated
NPAS3	Pig	9.60054e-25	1.07859	366	235	3.50852e-20	Up-regulated
ENSSSCG00000014569	Pig	1.40776e-24	1.6393	224	113	5.14468e-20	Up-regulated
SP110	Pig	2.91322e-24	3.70116	83	11	1.06464e-19	Up-regulated
C3orf38	Pig	3.34154e-24	1.39754	0.29	171	1.22117e-19	Up-regulated
MLLT11	Pig	5.16366e-24	1.61875	231	118	1.88706e-19	Up-regulated
PKP2	Pig	9.21247e-24	0.503038	836	815	3.3667e-19	Up-regulated
CD44	Pig	9.52542e-24	0.878996	576	507	3.48106e-19	Up-regulated
RPS29	Pig	1.0239e-23	1.62956	207	98	3.74183e-19	Up-regulated
EPSTI1	Pig	1.04407e-23	2.25971	136	44	3.81556e-19	Up-regulated
ENSSSCG00000009303	Pig	1.19434e-23	2.61293	127	38	4.36471e-19	Up-regulated
GK5	Pig	1.28585e-23	1.52239	345	235	4.69916e-19	Up-regulated
FRZB	Pig	1.29065e-23	1.28577	197	83	4.71667e-19	Up-regulated
ENSSSCG00000024660	Pig	2.72533e-23	3.57899	76	9	9.9597e-19	Up-regulated
PARP14	Pig	2.72645e-23	4.45316	69	5	9.96382e-19	Up-regulated
ENSSSCG00000032661	Pig	3.09831e-23	8.1188	56	0	1.13228e-18	Up-regulated
ACAP2	Pig	6.68103e-23	1.06148	538	491	2.44158e-18	Up-regulated
H3-5	Pig	7.8519e-23	1.33173	186	0.08	2.86948e-18	Up-regulated
SNX21	Pig	9.36848e-23	1.95522	204	98	3.42371e-18	Up-regulated
ABHD2	Pig	9.40272e-23	0.773579	736	708	3.43622e-18	Up-regulated
GADD45A	Pig	1.0998e-22	2.05465	111	29	4.01921e-18	Up-regulated
SMYD1	Pig	1.54991e-22	1.30219	391	279	5.66415e-18	Up-regulated
TGFB2	Pig	1.70681e-22	1.95002	0.17	0.07	6.23755e-18	Up-regulated
KATNBL1	Pig	2.08039e-22	0.825603	565	494	7.60277e-18	Up-regulated
FYTTD1	Pig	4.01995e-22	1.07992	487	409	1.46909e-17	Up-regulated
ENSSSCG00000009341	Pig	6.09066e-22	0.507721	779	791	2.22583e-17	Up-regulated
SYNPO2	Pig	6.5047e-22	0.504523	0.83	794	2.37714e-17	Up-regulated
C8orf37	Pig	7.15396e-22	1.42213	268	157	2.61441e-17	Up-regulated
MBNL1	Human	8.84716e-22	3.08334	71	8	3.23319e-17	Up-regulated
BTBD1	Pig	9.10184e-22	0.802767	599	0.55	3.32627e-17	Up-regulated
CPM	Pig	1.51419e-21	0.996018	0.25	137	5.53359e-17	Up-regulated
TLN2	Pig	2.34694e-21	0.600149	723	683	8.5769e-17	Up-regulated
CASP10	Pig	2.88951e-21	2.42381	146	57	1.05597e-16	Up-regulated
NDUFB5	Pig	3.32933e-21	1.26267	338	231	1.2167e-16	Up-regulated
HSPB8	Pig	3.47205e-21	0.71461	635	574	1.26886e-16	Up-regulated
ENSSSCG00000017754	Pig	5.16757e-21	5.12997	55	2	1.88849e-16	Up-regulated
TMEM144	Pig	5.31592e-21	0.945007	0.5	419	1.9427e-16	Up-regulated
CCDC201	Pig	5.81857e-21	3.74048	68	8	2.1264e-16	Up-regulated
ADAMTS19	Pig	6.19674e-21	3.04751	76	12	2.2646e-16	Up-regulated
ENSSSCG00000028691	Pig	1.07972e-20	3.62917	76	12	3.94583e-16	Up-regulated
RPL11	Human	1.12889e-20	5.81888	56	2	4.12554e-16	Up-regulated
RDH14	Pig	1.19e-20	1.50737	131	46	4.34887e-16	Up-regulated
MORC3	Pig	1.38638e-20	1.22878	279	171	5.06652e-16	Up-regulated
KDM5D	Pig	1.49895e-20	4.59236	58	4	5.4779e-16	Up-regulated
C9orf72	Pig	1.54129e-20	1.95893	165	72	5.63263e-16	Up-regulated
ARL6IP5	Pig	1.60495e-20	1.22721	313	207	5.8653e-16	Up-regulated
ENSSSCG00000023158	Pig	1.92851e-20	1.49886	191	92	7.04773e-16	Up-regulated
SH3BGR	Pig	2.06413e-20	1.11356	372	263	7.54336e-16	Up-regulated
ENSSSCG00000009534	Pig	2.73534e-20	1.27788	289	181	9.99631e-16	Up-regulated
HINT1	Pig	3.32767e-20	2.4587	105	0.03	1.2161e-15	Up-regulated
TGM2	Pig	4.10022e-20	0.808408	529	0.44	1.49843e-15	Up-regulated
TPT1	Pig	5.44271e-20	1.64819	254	157	1.98904e-15	Up-regulated
ENSSSCG00000040118	Pig	5.62938e-20	1.5406	223	0.12	2.05726e-15	Up-regulated
TIPARP	Pig	6.13869e-20	1.14313	297	185	2.24339e-15	Up-regulated
RPS25	Pig	8.9355e-20	2.27527	0.13	48	3.26548e-15	Up-regulated
RPS7	Pig	1.11996e-19	1.5661	199	102	4.09288e-15	Up-regulated
PER1	Pig	1.64975e-19	0.873849	389	286	6.029e-15	Up-regulated
ANO3	Pig	1.78296e-19	4.15366	66	9	6.51583e-15	Up-regulated
RPL18	Pig	2.81821e-19	1.4757	224	125	1.02991e-14	Up-regulated
ENSSSCG00000044574	Pig	3.01346e-19	5.82774	51	2	1.10127e-14	Up-regulated
HIGD2A	Pig	3.35598e-19	2.13561	0.11	35	1.22644e-14	Up-regulated
AIMP1	Pig	3.3662e-19	0.922332	0.5	435	1.23018e-14	Up-regulated
FTL	Pig	4.35374e-19	1.69735	186	92	1.59107e-14	Up-regulated
ATP5MC3	Pig	4.41447e-19	1.5749	184	91	1.61327e-14	Up-regulated
IL6ST	Pig	4.62646e-19	0.911146	453	378	1.69074e-14	Up-regulated
ENSSSCG00000031798	Pig	4.85818e-19	1.68067	171	79	1.77542e-14	Up-regulated
MRPL33	Pig	6.74621e-19	1.45551	0.23	132	2.4654e-14	Up-regulated
1,00 AMD	Pig	7.65682e-19	0.705121	598	557	2.79818e-14	Up-regulated
MTPN	Pig	8.3989e-19	0.924229	552	512	3.06938e-14	Up-regulated
ADGRD1	Pig	8.91498e-19	1.38675	257	157	3.25798e-14	Up-regulated
NKAIN2	Pig	1.27025e-18	1.89778	226	131	4.64212e-14	Up-regulated
AKAP7	Pig	1.45072e-18	1.1353	281	179	5.30165e-14	Up-regulated
FAM76A	Pig	1.75551e-18	1.17998	292	191	6.41552e-14	Up-regulated
DBI	Pig	2.5541e-18	2.68504	96	28	9.33398e-14	Up-regulated
ENSSSCG00000031838	Pig	2.76372e-18	1.62526	156	0.07	1.01e-13	Up-regulated
ENSSSCG00000029830	Pig	3.37091e-18	1.62032	191	99	1.2319e-13	Up-regulated
ENSSSCG00000013436	Pig	3.65682e-18	1.34901	0.26	161	1.33639e-13	Up-regulated
RBM39	Pig	4.47593e-18	0.658403	618	604	1.63573e-13	Up-regulated
ENSSSCG00000006350	Pig	4.50509e-18	3.31617	64	9	1.64639e-13	Up-regulated
IER5	Pig	4.61862e-18	2.28806	109	37	1.68787e-13	Up-regulated
VCP	Pig	4.97646e-18	0.952419	451	376	1.81865e-13	Up-regulated
REEP5	Pig	6.1888e-18	1.20705	348	258	2.2617e-13	Up-regulated
ENSSSCG00000016791	Pig	9.53293e-18	2.05629	95	27	3.48381e-13	Up-regulated
NME2	Pig	9.5588e-18	1.81695	157	73	3.49326e-13	Up-regulated
S100A1	Pig	1.01128e-17	1.95924	139	59	3.69571e-13	Up-regulated
ZFAND5	Pig	1.01742e-17	0.786431	484	0.42	3.71815e-13	Up-regulated
ACSM5	Pig	1.07325e-17	1.28808	365	0.28	3.92221e-13	Up-regulated
F3	Pig	1.2854e-17	2.50921	0.09	25	4.6975e-13	Up-regulated
SLC25A3	Pig	1.34897e-17	0.759562	543	508	4.92981e-13	Up-regulated
ETFRF1	Pig	1.41028e-17	1.47869	0.22	127	5.15385e-13	Up-regulated
MOV10	Pig	2.63149e-17	2.1831	89	25	9.61679e-13	Up-regulated
CALU	Pig	2.95452e-17	0.861435	476	418	1.07973e-12	Up-regulated
ZNF804B	Pig	3.08252e-17	1.48893	258	162	1.12651e-12	Up-regulated
MAP1LC3A	Pig	3.76647e-17	1.26665	219	123	1.37646e-12	Up-regulated
ENSSSCG00000033262	Pig	4.08044e-17	1.18122	316	231	1.4912e-12	Up-regulated
CST3	Pig	4.14333e-17	2.79405	71	15	1.51418e-12	Up-regulated
RPS15A	Pig	5.31202e-17	2.56865	91	27	1.94128e-12	Up-regulated
ENSSSCG00000008451	Pig	5.74078e-17	0.584301	0.67	669	2.09797e-12	Up-regulated
ZDHHC14	Pig	6.01861e-17	1.08209	327	224	2.1995e-12	Up-regulated
THSD7A	Pig	6.08213e-17	0.662092	588	0.52	2.22271e-12	Up-regulated
ZNF664	Pig	6.31947e-17	0.700315	593	559	2.30945e-12	Up-regulated
FBXO40	Pig	8.10703e-17	0.9345	474	413	2.96271e-12	Up-regulated
RPLP2	Pig	8.90384e-17	1.84245	144	66	3.25391e-12	Up-regulated
VWDE	Pig	9.30654e-17	4.61752	44	2	3.40108e-12	Up-regulated
MYO1B	Pig	9.39998e-17	3.23529	51	5	3.43522e-12	Up-regulated
FXYD1	Human	9.48769e-17	2.04539	77	18	3.46728e-12	Up-regulated
RPL27	Pig	9.79316e-17	2.20389	103	35	3.57891e-12	Up-regulated
PSMB8	Pig	1.02832e-16	7.32239	0.04	0	3.75798e-12	Up-regulated
ADIPOR2	Pig	1.03827e-16	1.53208	263	172	3.79435e-12	Up-regulated
UBE2L6	Pig	1.11114e-16	4.36235	47	3	4.06066e-12	Up-regulated
RPL15	Pig	1.94445e-16	1.48234	127	52	7.10598e-12	Up-regulated
CRYM	Pig	1.95011e-16	1.44059	193	103	7.12669e-12	Up-regulated
SERTAD1	Pig	2.40096e-16	2.72505	73	17	8.77431e-12	Up-regulated
RPL37	Pig	2.42056e-16	1.48083	149	0.07	8.84594e-12	Up-regulated
ENSSSCG00000016687	Pig	2.88594e-16	1.54256	242	154	1.05467e-11	Up-regulated
STXBP5L	Pig	2.92288e-16	1.04479	0.4	313	1.06817e-11	Up-regulated
RICTOR	Pig	3.02714e-16	0.541092	708	721	1.10627e-11	Up-regulated
ENSSSCG00000013889	Pig	3.07229e-16	1.57962	162	0.08	1.12277e-11	Up-regulated
NDUFB2	Pig	3.12936e-16	1.3709	234	146	1.14362e-11	Up-regulated
EIF1	Pig	3.94225e-16	1.09573	238	145	1.4407e-11	Up-regulated
FXR1	Pig	5.5435e-16	0.653932	598	584	2.02587e-11	Up-regulated
ENSSSCG00000049585	Pig	5.65827e-16	6.88394	39	1	2.06782e-11	Up-regulated
ENSSSCG00000011272	Pig	7.35348e-16	1.53027	151	73	2.68733e-11	Up-regulated
ENSSSCG00000014910	Pig	7.50426e-16	2.40467	74	18	2.74243e-11	Up-regulated
DAPK2	Pig	1.00491e-15	1.69962	239	152	3.67244e-11	Up-regulated
ARHGEF3	Pig	1.01008e-15	1.3424	329	247	3.69135e-11	Up-regulated
THBS1	Pig	1.09574e-15	1.43895	114	44	4.00437e-11	Up-regulated
ENSSSCG00000034019	Pig	1.19602e-15	1.37738	261	175	4.37085e-11	Up-regulated
RPL37A	Pig	1.40781e-15	1.17412	272	183	5.14483e-11	Up-regulated
MAPT	Pig	1.51022e-15	1.0765	381	297	5.5191e-11	Up-regulated
PALMD	Pig	1.6429e-15	0.593124	651	622	6.00396e-11	Up-regulated
CMAS	Pig	1.83337e-15	1.2722	267	0.18	6.70007e-11	Up-regulated
R3HDM2	Pig	1.92871e-15	0.541284	748	752	7.04846e-11	Up-regulated
ENSSSCG00000041649	Pig	2.01394e-15	1.0319	386	319	7.35996e-11	Up-regulated
ZNF366	Pig	2.10229e-15	1.13991	265	176	7.6828e-11	Up-regulated
GSR	Pig	2.24786e-15	1.5174	248	0.16	8.21482e-11	Up-regulated
STXBP6	Pig	2.34443e-15	0.98039	416	335	8.56771e-11	Up-regulated
ATG4A	Pig	2.67577e-15	1.59494	215	132	9.7786e-11	Up-regulated
ZDHHC2	Pig	3.11593e-15	0.836936	481	416	1.13872e-10	Up-regulated
RPS8	Pig	3.38169e-15	1.70859	158	82	1.23584e-10	Up-regulated
FAM126A	Pig	3.6213e-15	0.79431	511	467	1.3234e-10	Up-regulated
SEMA3C	Pig	4.03555e-15	0.7424	542	484	1.47479e-10	Up-regulated
ANKRD39	Pig	4.36337e-15	1.14349	378	306	1.5946e-10	Up-regulated
ENSSSCG00000007524	Pig	4.83897e-15	1.02568	342	254	1.7684e-10	Up-regulated
DDX24	Pig	6.02137e-15	1.26572	188	106	2.20051e-10	Up-regulated
ENSSSCG00000009146	Pig	6.76513e-15	1.64685	159	82	2.47232e-10	Up-regulated
GADD45B	Pig	7.30449e-15	1.64944	0.1	37	2.66943e-10	Up-regulated
NDEL1	Pig	9.34693e-15	1.03793	376	302	3.41583e-10	Up-regulated
HSD11B1L	Pig	1.09425e-14	1.42842	209	127	3.99892e-10	Up-regulated
LAMB1	Pig	1.42858e-14	2.28248	63	14	5.22075e-10	Up-regulated
ERAP1	Pig	1.70954e-14	1.58792	114	48	6.24752e-10	Up-regulated
SLC25A13	Pig	1.96229e-14	0.544	685	0.68	7.1712e-10	Up-regulated
MICOS13	Pig	1.98882e-14	1.36932	158	82	7.26813e-10	Up-regulated
ASAP1	Pig	2.51872e-14	0.748378	598	585	9.20468e-10	Up-regulated
TMEM260	Pig	2.88421e-14	0.877788	432	371	1.05404e-09	Up-regulated
PNPT1	Pig	4.20019e-14	1.23912	238	156	1.53496e-09	Up-regulated
PHF11	Pig	4.44272e-14	1.15931	292	211	1.62359e-09	Up-regulated
IRF2	Pig	4.44733e-14	0.932668	423	364	1.62528e-09	Up-regulated
ENSSSCG00000032129	Pig	4.50099e-14	1.13408	309	232	1.64489e-09	Up-regulated
LAMC1	Pig	5.21268e-14	0.534659	664	678	1.90497e-09	Up-regulated
PRMT2	Pig	5.26161e-14	0.54088	635	662	1.92286e-09	Up-regulated
ERBB3	Pig	5.37181e-14	1.34532	0.15	76	1.96313e-09	Up-regulated
PXK	Pig	5.56361e-14	0.868717	457	399	2.03322e-09	Up-regulated
RPS13	Pig	5.60801e-14	4.65514	0.04	3	2.04945e-09	Up-regulated
GPCPD1	Pig	6.524e-14	0.831177	335	254	2.3842e-09	Up-regulated
NDUFA4	Pig	7.3461e-14	0.733778	541	514	2.68463e-09	Up-regulated
SPSB1	Pig	8.5606e-14	1.99294	0.13	62	3.12847e-09	Up-regulated
NTN1	Pig	8.75736e-14	2.44998	0.08	26	3.20038e-09	Up-regulated
ENSSSCG00000041465	Pig	8.7887e-14	1.07153	209	125	3.21183e-09	Up-regulated
ATP5MG	Pig	9.37622e-14	1.08182	309	229	3.42654e-09	Up-regulated
TP63	Pig	1.24372e-13	2.40986	77	24	4.54516e-09	Up-regulated
ROMO1	Pig	1.56332e-13	1.66227	107	44	5.71315e-09	Up-regulated
CLK1	Pig	1.68614e-13	0.892084	355	278	6.16198e-09	Up-regulated
SEMA6D	Pig	1.75723e-13	1.67488	158	86	6.42179e-09	Up-regulated
PSMB4	Pig	1.77001e-13	1.97869	104	43	6.4685e-09	Up-regulated
ENSSSCG00000017913	Pig	1.9026e-13	3.01638	56	12	6.95304e-09	Up-regulated
QKI	Human	2.04935e-13	2.89744	55	11	7.48933e-09	Up-regulated
ZNF654	Human	2.37776e-13	3.16678	58	13	8.68952e-09	Up-regulated
ENSSSCG00000010432	Pig	2.556e-13	1.43116	75	23	9.34091e-09	Up-regulated
CALCOCO2	Pig	2.74257e-13	0.855587	364	289	1.00227e-08	Up-regulated
RPS23	Pig	2.79509e-13	2.20146	67	18	1.02146e-08	Up-regulated
PDLIM1	Pig	2.82197e-13	0.667633	577	532	1.03129e-08	Up-regulated
ENSSSCG00000016755	Pig	2.93849e-13	1.57587	116	52	1.07387e-08	Up-regulated
ENDOV	Pig	3.26657e-13	1.46015	133	65	1.19377e-08	Up-regulated
SMDT1	Pig	3.7936e-13	1.47364	134	66	1.38637e-08	Up-regulated
MRPL57	Pig	5.14935e-13	1.23068	0.15	78	1.88183e-08	Up-regulated
ENSSSCG00000025593	Pig	5.25187e-13	6.90454	0.03	0	1.9193e-08	Up-regulated
ENSSSCG00000036227	Pig	5.6184e-13	0.919123	388	325	2.05324e-08	Up-regulated
ENSSSCG00000030849	Pig	6.34358e-13	1.63918	86	31	2.31826e-08	Up-regulated
TRAPPC2B	Pig	9.2125e-13	2.00574	81	28	3.36671e-08	Up-regulated
SCARB2	Pig	1.05121e-12	0.943811	0.34	267	3.84166e-08	Up-regulated
HMOX1	Human	1.07316e-12	0.836335	513	487	3.92185e-08	Up-regulated
NDUFB4	Pig	1.2123e-12	1.36381	197	122	4.43036e-08	Up-regulated
ENSSSCG00000039723	Pig	1.28948e-12	1.26779	256	0.18	4.71241e-08	Up-regulated
SS18L2	Pig	1.4038e-12	1.65106	129	64	5.13019e-08	Up-regulated
KCNJ8	Pig	2.35644e-12	1.16429	0.23	154	8.6116e-08	Up-regulated
SORT1	Pig	2.40474e-12	1.05081	0.37	305	8.78812e-08	Up-regulated
DENND3	Pig	2.53537e-12	2.18175	73	24	9.26552e-08	Up-regulated
ENSSSCG00000040340	Pig	3.00825e-12	5.25872	0.03	1	1.09937e-07	Up-regulated
ENSSSCG00000032436	Pig	3.33702e-12	6.71256	28	0	1.21951e-07	Up-regulated
COX7A2	Pig	3.42185e-12	1.24049	0.18	108	1.25051e-07	Up-regulated
PPP2R2B	Pig	3.61514e-12	1.01071	229	149	1.32115e-07	Up-regulated
RXRG	Pig	3.7165e-12	1.6441	156	88	1.35819e-07	Up-regulated
COX7C	Pig	4.35094e-12	0.765167	507	487	1.59005e-07	Up-regulated
C2CD6	Pig	4.36003e-12	1.19589	0.34	283	1.59337e-07	Up-regulated
DPYSL3	Pig	4.42768e-12	0.624475	0.59	541	1.6181e-07	Up-regulated
KPNA4	Pig	4.49932e-12	0.811876	467	428	1.64428e-07	Up-regulated
GPR161	Pig	5.06552e-12	0.869316	485	467	1.85119e-07	Up-regulated
ERBB4	Pig	5.37234e-12	0.531887	545	467	1.96332e-07	Up-regulated
SNX14	Pig	5.58676e-12	0.745363	442	393	2.04168e-07	Up-regulated
REEP1	Pig	6.39799e-12	0.979371	406	343	2.33815e-07	Up-regulated
DHX58	Pig	6.56008e-12	4.22304	33	2	2.39738e-07	Up-regulated
CEBPB	Pig	7.5775e-12	1.56273	0.1	44	2.7692e-07	Up-regulated
SLC35F5	Pig	7.97609e-12	1.0761	359	303	2.91486e-07	Up-regulated
RPL11	Pig	8.35669e-12	1.07749	221	147	3.05395e-07	Up-regulated
ELOB	Pig	9.34437e-12	1.40811	151	85	3.4149e-07	Up-regulated
ISG20	Pig	1.01106e-11	6.5072	27	0	3.69492e-07	Up-regulated
RPS4X	Pig	1.16111e-11	1.88314	0.1	45	4.24329e-07	Up-regulated
POLK	Pig	1.21569e-11	0.860793	366	305	4.44273e-07	Up-regulated
SMAD3	Pig	1.24106e-11	0.797568	521	489	4.53546e-07	Up-regulated
PSMA6	Pig	1.26039e-11	0.778606	366	297	4.60609e-07	Up-regulated
TEP1	Pig	1.31499e-11	1.67919	166	99	4.80563e-07	Up-regulated
KLHL24	Pig	1.33929e-11	0.627802	593	571	4.89443e-07	Up-regulated
DUSP1	Pig	1.40959e-11	1.05986	258	183	5.15134e-07	Up-regulated
CIPC	Pig	1.52902e-11	0.942572	0.24	167	5.58779e-07	Up-regulated
PLAAT3	Pig	1.55522e-11	1.56373	0.18	112	5.68357e-07	Up-regulated
TECTA	Pig	1.90639e-11	0.950054	0.33	264	6.96689e-07	Up-regulated
HOOK2	Pig	1.98832e-11	1.41458	181	112	7.26632e-07	Up-regulated
RPS3A	Pig	2.2077e-11	1.72447	106	0.05	8.06806e-07	Up-regulated
GSTO2	Pig	2.88525e-11	4.41184	32	2	1.05441e-06	Up-regulated
ENSSSCG00000051006	Pig	2.89611e-11	2.88067	0.04	7	1.05838e-06	Up-regulated
ENSSSCG00000039071	Pig	2.93933e-11	3.00534	0.05	12	1.07418e-06	Up-regulated
PGGT1B	Pig	2.94441e-11	0.779576	499	477	1.07603e-06	Up-regulated
CRHR2	Pig	3.02144e-11	3.93241	36	5	1.10419e-06	Up-regulated
ADAMTS1	Pig	3.23401e-11	1.36638	108	51	1.18187e-06	Up-regulated
IRF7	Pig	3.37373e-11	2.79712	36	5	1.23293e-06	Up-regulated
MAVS	Pig	3.64004e-11	0.742365	0.47	435	1.33025e-06	Up-regulated
MIF	Pig	3.78692e-11	1.451	119	0.06	1.38393e-06	Up-regulated
TMEM267	Pig	4.11711e-11	1.42345	173	106	1.5046e-06	Up-regulated
DMXL1	Pig	4.91642e-11	0.565317	645	0.66	1.79671e-06	Up-regulated
COX6A2	Pig	5.4854e-11	1.00382	286	215	2.00464e-06	Up-regulated
CCL5	Pig	5.62276e-11	4.23882	38	6	2.05484e-06	Up-regulated
MICU3	Pig	5.96697e-11	0.632922	574	568	2.18063e-06	Up-regulated
AFF4	Pig	6.30058e-11	0.523526	601	597	2.30255e-06	Up-regulated
STX12	Pig	7.33715e-11	0.858419	397	345	2.68136e-06	Up-regulated
ITGB6	Pig	7.5604e-11	1.21034	229	157	2.76295e-06	Up-regulated
ACADL	Pig	7.89006e-11	1.00956	308	0.24	2.88342e-06	Up-regulated
ODF2L	Pig	7.9116e-11	1.5969	103	49	2.8913e-06	Up-regulated
ERC2	Pig	8.47858e-11	1.73211	131	72	3.0985e-06	Up-regulated
SYNPO2L	Pig	8.66749e-11	0.700478	0.47	426	3.16753e-06	Up-regulated
TREX1	Pig	9.08593e-11	3.60823	35	5	3.32045e-06	Up-regulated
GM2A	Pig	9.58163e-11	2.53219	49	12	3.50161e-06	Up-regulated
ENSSSCG00000022322	Pig	9.90874e-11	1.40764	0.14	78	3.62115e-06	Up-regulated
LGALS3BP	Pig	1.03509e-10	3.78459	27	1	3.78273e-06	Up-regulated
TRIB1	Pig	1.08912e-10	1.44848	154	92	3.98018e-06	Up-regulated
ENSSSCG00000031037	Pig	1.1051e-10	1.29563	128	68	4.0386e-06	Up-regulated
TUBB2B	Pig	1.12579e-10	1.42187	124	66	4.11419e-06	Up-regulated
ATP5PF	Pig	1.14781e-10	1.11633	218	0.15	4.19468e-06	Up-regulated
NMI	Pig	1.17513e-10	5.15644	26	1	4.29451e-06	Up-regulated
ENSSSCG00000001341	Pig	1.19182e-10	1.54664	92	0.04	4.35552e-06	Up-regulated
MACROD2	Pig	1.23341e-10	0.759149	0.36	286	4.50748e-06	Up-regulated
TACR1	Pig	1.40832e-10	1.32297	151	88	5.14669e-06	Up-regulated
ENSSSCG00000026981	Pig	1.45741e-10	1.02709	262	194	5.3261e-06	Up-regulated
CEP112	Pig	1.4603e-10	0.86054	0.33	0.26	5.33667e-06	Up-regulated
SLC16A9	Pig	1.53892e-10	1.63687	82	34	5.62398e-06	Up-regulated
ATP5ME	Pig	1.59758e-10	0.784313	324	256	5.83834e-06	Up-regulated
CNBP	Pig	2.16277e-10	0.648048	351	287	7.90383e-06	Up-regulated
NDUFS5	Pig	2.35489e-10	1.65981	124	67	8.60596e-06	Up-regulated
ENSSSCG00000024860	Pig	2.61404e-10	3.86554	34	5	9.55301e-06	Up-regulated
HECW1	Pig	2.77398e-10	2.26073	56	17	1.01375e-05	Up-regulated
KIAA1217	Pig	3.21072e-10	0.638849	478	439	1.17336e-05	Up-regulated
TWF2	Pig	3.63221e-10	1.62808	125	69	1.32739e-05	Up-regulated
MASP1	Pig	4.66238e-10	1.81666	83	36	1.70387e-05	Up-regulated
PRDX2	Pig	4.87307e-10	1.11271	0.13	72	1.78086e-05	Up-regulated
INHBA	Pig	5.16121e-10	2.84708	36	6	1.88616e-05	Up-regulated
SCAND1	Pig	6.1559e-10	1.65346	82	35	2.24967e-05	Up-regulated
SETD7	Pig	6.54857e-10	0.755139	422	372	2.39317e-05	Up-regulated
ENSSSCG00000001396	Pig	8.4778e-10	6.2096	22	0	3.09821e-05	Up-regulated
SYNM	Pig	9.72499e-10	1.35341	189	127	3.554e-05	Up-regulated
NREP	Pig	1.10721e-09	2.52524	0.05	15	4.04631e-05	Up-regulated
FBXO21	Pig	1.15537e-09	0.695215	434	389	4.22229e-05	Up-regulated
NAMPT	Pig	1.18341e-09	0.667504	423	382	4.32476e-05	Up-regulated
PLK2	Pig	1.21811e-09	2.91832	49	14	4.45158e-05	Up-regulated
RPS12	Human	1.22598e-09	6.26082	22	0	4.48035e-05	Up-regulated
ENSSSCG00000021180	Pig	1.2352e-09	1.75898	64	24	4.51403e-05	Up-regulated
PSMA3	Pig	1.28389e-09	0.879068	277	214	4.69197e-05	Up-regulated
FAM43B	Pig	1.29322e-09	3.23623	36	7	4.72606e-05	Up-regulated
PKNOX2	Pig	1.51467e-09	1.93897	63	23	5.53536e-05	Up-regulated
ABHD4	Pig	1.59997e-09	1.10581	269	207	5.84711e-05	Up-regulated
ENSSSCG00000046747	Pig	1.61891e-09	1.82783	76	32	5.9163e-05	Up-regulated
ENSSSCG00000006081	Pig	1.61926e-09	1.52933	123	69	5.91758e-05	Up-regulated
ACO1	Pig	1.69301e-09	0.577193	575	568	6.18712e-05	Up-regulated
ENSSSCG00000007692	Pig	1.70254e-09	0.847353	0.38	339	6.22192e-05	Up-regulated
ENSSSCG00000006958	Pig	1.76883e-09	2.71088	31	4	6.46418e-05	Up-regulated
CYRIA	Pig	1.7999e-09	1.01345	285	227	6.57774e-05	Up-regulated
PFN2	Pig	1.87902e-09	1.4317	161	104	6.8669e-05	Up-regulated
VASH2	Pig	1.94799e-09	1.79229	0.09	43	7.11892e-05	Up-regulated
ZNF462	Pig	1.96836e-09	0.614337	572	558	7.19339e-05	Up-regulated
RPS18	Pig	2.31106e-09	1.36691	111	59	8.44578e-05	Up-regulated
RUBCNL	Pig	2.33245e-09	4.04297	28	3	8.52393e-05	Up-regulated
TRIM56	Pig	2.33387e-09	2.2596	46	13	8.52913e-05	Up-regulated
TRIM26	Pig	2.43043e-09	1.4043	86	0.04	8.88202e-05	Up-regulated
DYSF	Pig	2.49343e-09	0.680594	608	598	9.11223e-05	Up-regulated
ENSSSCG00000035080	Pig	2.55131e-09	1.74753	92	46	9.32375e-05	Up-regulated
AVPI1	Pig	2.81386e-09	1.12184	137	0.08	0.000102832	Up-regulated
ENSSSCG00000030801	Pig	3.02826e-09	1.65911	88	42	0.000110668	Up-regulated
PIAS1	Pig	3.16604e-09	0.576382	601	616	0.000115703	Up-regulated
COL5A3	Pig	3.60581e-09	3.12912	34	7	0.000131774	Up-regulated
ENSSSCG00000006777	Pig	4.17487e-09	2.30237	49	15	0.000152571	Up-regulated
CDKN1A	Pig	4.24932e-09	0.898781	117	64	0.000155291	Up-regulated
MYO5A	Pig	4.34472e-09	0.584913	538	522	0.000158778	Up-regulated
ENSSSCG00000016571	Pig	4.49193e-09	3.84131	24	2	0.000164158	Up-regulated
ZCCHC24	Pig	4.6075e-09	0.613915	481	451	0.000168381	Up-regulated
ENSSSCG00000021977	Pig	5.00263e-09	0.535392	543	522	0.000182821	Up-regulated
1,00 STN	Pig	5.34795e-09	1.22325	217	158	0.000195441	Up-regulated
PCMT1	Pig	5.62289e-09	0.802578	373	329	0.000205489	Up-regulated
ENSSSCG00000020790	Pig	6.23474e-09	1.27433	141	85	0.000227849	Up-regulated
ARMC2	Pig	6.39879e-09	0.845405	424	402	0.000233844	Up-regulated
PPP1R14B	Pig	6.76154e-09	1.39465	99	51	0.0002471	Up-regulated
SEPTIN11	Pig	7.18493e-09	1.1158	288	232	0.000262573	Up-regulated
GNB2	Pig	7.33198e-09	3.24909	32	6	0.000267947	Up-regulated
MTUS2	Pig	7.55234e-09	0.553091	547	514	0.000276	Up-regulated
RPLP0	Human	7.75354e-09	6.32625	19	0	0.000283353	Up-regulated
RHOQ	Human	8.02113e-09	4.86796	22	1	0.000293132	Up-regulated
ENSSSCG00000047863	Pig	8.46918e-09	1.89401	48	15	0.000309506	Up-regulated
RPS6	Pig	8.86096e-09	1.74891	85	41	0.000323824	Up-regulated
ENSSSCG00000007743	Pig	8.92917e-09	1.65289	0.08	37	0.000326316	Up-regulated
NES	Pig	9.08568e-09	1.98387	114	65	0.000332036	Up-regulated
ENSSSCG00000039582	Pig	9.52222e-09	0.787888	282	225	0.00034799	Up-regulated
EIF1B	Pig	1.00791e-08	1.47467	96	0.05	0.00036834	Up-regulated
ENSSSCG00000039009	Pig	1.05399e-08	1.96825	84	0.04	0.00038518	Up-regulated
TIMM8B	Pig	1.1617e-08	0.79226	155	97	0.000424542	Up-regulated
SLAIN2	Pig	1.3118e-08	0.829589	409	383	0.000479398	Up-regulated
SLC10A1	Pig	1.42761e-08	1.86712	61	24	0.00052172	Up-regulated
STC2	Pig	1.67856e-08	0.618533	504	484	0.000613428	Up-regulated
CDKL1	Pig	1.69438e-08	1.28446	0.17	114	0.00061921	Up-regulated
IFNGR1	Pig	1.7012e-08	1.33825	183	128	0.000621703	Up-regulated
ENSSSCG00000011553	Pig	1.74035e-08	0.930089	308	255	0.000636011	Up-regulated
MEMO1	Pig	1.75813e-08	0.507289	638	656	0.000642507	Up-regulated
SLC38A11	Pig	1.76079e-08	3.37126	0.03	5	0.000643482	Up-regulated
SERF2	Pig	1.82319e-08	3.143	32	7	0.000666285	Up-regulated
CLMN	Pig	1.85601e-08	1.28425	139	85	0.000678278	Up-regulated
ENSSSCG00000012046	Pig	1.86391e-08	1.14781	168	112	0.000681165	Up-regulated
MEGF11	Pig	1.96092e-08	1.19614	98	51	0.000716616	Up-regulated
DCTN2	Pig	2.08004e-08	0.830841	0.31	253	0.000760151	Up-regulated
COX7A1	Pig	2.09087e-08	0.994551	223	166	0.000764107	Up-regulated
PTDSS1	Pig	2.09607e-08	0.810927	0.51	0.5	0.000766008	Up-regulated
PON1	Pig	2.13245e-08	1.53667	115	67	0.000779305	Up-regulated
SLC25A24	Pig	2.36061e-08	1.10196	139	85	0.000862687	Up-regulated
NDUFB11	Pig	2.71939e-08	1.18127	102	55	0.000993802	Up-regulated
UBE2D2	Human	2.80644e-08	2.80056	22	2	0.00102561	Up-regulated
KLHL4	Pig	2.96236e-08	2.43868	48	16	0.00108259	Up-regulated
COX8A	Pig	3.02853e-08	1.02464	144	0.09	0.00110678	Up-regulated
SLC24A2	Pig	3.13284e-08	2.68931	44	14	0.00114489	Up-regulated
RPS19	Human	3.39252e-08	6.13089	18	0	0.0012398	Up-regulated
MMD	Pig	3.45371e-08	0.589729	516	483	0.00126216	Up-regulated
RUSC2	Pig	3.6224e-08	0.87558	285	231	0.00132381	Up-regulated
SLC7A2	Pig	3.73088e-08	0.92692	345	297	0.00136345	Up-regulated
TMC7	Pig	3.80681e-08	0.719176	485	456	0.0013912	Up-regulated
TSPAN3	Pig	3.90064e-08	1.07545	248	195	0.00142549	Up-regulated
UQCR10	Pig	3.91654e-08	0.896087	253	196	0.0014313	Up-regulated
ZFAND5	Human	4.01682e-08	3.73374	26	4	0.00146795	Up-regulated
ZNF292	Human	4.4178e-08	3.00429	23	2	0.00161449	Up-regulated
NUBP1	Pig	4.43202e-08	0.884978	343	302	0.00161968	Up-regulated
ANO6	Pig	4.53729e-08	1.10334	0.3	257	0.00165815	Up-regulated
ARHGAP17	Pig	4.95336e-08	0.902761	512	517	0.00181021	Up-regulated
CDC42EP3	Pig	4.96477e-08	1.07702	147	94	0.00181438	Up-regulated
RPS15	Pig	5.07601e-08	0.801719	321	275	0.00185503	Up-regulated
CTDSPL	Pig	5.22523e-08	0.681891	0.46	426	0.00190956	Up-regulated
FBLN5	Pig	5.64059e-08	0.64789	565	552	0.00206135	Up-regulated
SOD1	Pig	5.83776e-08	1.56948	83	42	0.00213341	Up-regulated
RAN	Pig	5.86616e-08	2.08797	47	16	0.00214379	Up-regulated
NFKBIA	Pig	6.25617e-08	1.70586	59	24	0.00228632	Up-regulated
ENSSSCG00000044615	Pig	7.40611e-08	1.57797	0.09	48	0.00270656	Up-regulated
ATP5MC2	Human	7.53397e-08	2.76115	31	7	0.00275329	Up-regulated
ENSSSCG00000048968	Pig	7.95208e-08	4.59314	21	2	0.00290609	Up-regulated
TMEM52	Pig	8.29732e-08	3.71827	25	4	0.00303225	Up-regulated
VEZT	Pig	8.53171e-08	0.617678	0.51	504	0.00311792	Up-regulated
USP34	Human	8.94464e-08	5.40114	18	1	0.00326882	Up-regulated
DERL1	Pig	8.96997e-08	0.771995	415	386	0.00327808	Up-regulated
UBD	Pig	8.98875e-08	5.46274	18	1	0.00328494	Up-regulated
NIPBL	Human	9.47497e-08	3.35761	28	5	0.00346263	Up-regulated
OAZ1	Pig	9.8336e-08	1.22489	69	31	0.00359369	Up-regulated
TIMM10	Pig	9.84483e-08	2.46848	34	8	0.00359779	Up-regulated
ARHGAP31	Pig	1.05785e-07	0.997775	267	215	0.00386591	Up-regulated
PUM3	Pig	1.08108e-07	0.749361	285	232	0.0039508	Up-regulated
FYB2	Pig	1.09507e-07	1.14667	146	95	0.00400192	Up-regulated
ENSSSCG00000035738	Pig	1.12117e-07	3.30815	26	4	0.00409732	Up-regulated
TRAIP	Pig	1.15924e-07	2.22787	36	0.01	0.00423645	Up-regulated
AP3M1	Pig	1.22765e-07	0.706601	419	399	0.00448644	Up-regulated
SBK1	Pig	1.35162e-07	1.67222	95	53	0.00493949	Up-regulated
RPS24	Human	1.48599e-07	6.02058	16	0	0.00543055	Up-regulated
ENSSSCG00000002950	Pig	1.50034e-07	1.06661	358	322	0.00548301	Up-regulated
CAMK2D	Human	1.54468e-07	4.18419	19	1	0.00564504	Up-regulated
MTHFD2L	Pig	1.65243e-07	0.612741	513	505	0.0060388	Up-regulated
XDH	Pig	1.85516e-07	1.14191	211	158	0.00677967	Up-regulated
CCDC9B	Pig	1.93298e-07	1.29191	127	0.08	0.00706407	Up-regulated
S100A10	Pig	1.97115e-07	2.05311	41	14	0.00720355	Up-regulated
B4GALNT3	Pig	2.01748e-07	1.04019	214	0.16	0.00737289	Up-regulated
SH3GLB1	Pig	2.05826e-07	0.620117	436	418	0.00752191	Up-regulated
RPS17	Pig	2.08236e-07	2.11857	47	17	0.00761	Up-regulated
PLEKHA1	Pig	2.09875e-07	0.751263	394	361	0.00766989	Up-regulated
ENSSSCG00000005453	Pig	2.18555e-07	1.2628	94	52	0.00798709	Up-regulated
VCPKMT	Pig	2.20991e-07	1.41082	113	67	0.00807611	Up-regulated
HDAC7	Pig	2.2784e-07	1.11573	236	187	0.00832641	Up-regulated
OSR1	Pig	2.5001e-07	0.583692	345	292	0.00913661	Up-regulated
AIG1	Pig	2.57401e-07	1.05135	224	168	0.00940671	Up-regulated
PURG	Pig	2.70819e-07	0.733139	341	295	0.00989707	Up-regulated
IRX3	Pig	2.72133e-07	1.80693	63	28	0.00994509	Up-regulated
BHLHE40	Pig	2.79075e-07	0.865481	242	188	0.0101988	Up-regulated
SRSF12	Pig	3.15429e-07	1.04367	219	168	0.0115273	Up-regulated
ENSSSCG00000015027	Pig	3.19102e-07	1.04386	142	93	0.0116616	Up-regulated
MAML2	Human	3.21685e-07	2.4426	29	7	0.011756	Up-regulated
PLEKHA7	Pig	3.30059e-07	0.584797	427	387	0.012062	Up-regulated
SSBP2	Human	3.70375e-07	2.13387	64	0.03	0.0135354	Up-regulated
GRB14	Pig	4.19029e-07	0.867781	344	305	0.0153134	Up-regulated
ACOT13	Pig	4.2341e-07	0.560492	495	478	0.0154735	Up-regulated
JCHAIN	Pig	4.35825e-07	1.13117	158	107	0.0159272	Up-regulated
EFR3B	Pig	4.45747e-07	0.982165	338	297	0.0162898	Up-regulated
RGS1	Pig	4.50453e-07	6.56127	15	0	0.0164618	Up-regulated
AQP1	Pig	4.50453e-07	5.59554	15	0	0.0164618	Up-regulated
ENSSSCG00000049384	Pig	4.63119e-07	3.90898	18	1	0.0169247	Up-regulated
UBL5	Pig	4.66246e-07	1.81205	56	24	0.017039	Up-regulated
NEMP2	Pig	4.68484e-07	1.39195	109	66	0.0171208	Up-regulated
VASN	Pig	4.84691e-07	1.52423	55	23	0.017713	Up-regulated
EIF6	Pig	4.89591e-07	1.8175	64	0.03	0.0178921	Up-regulated
MRPS24	Pig	5.12308e-07	1.40565	82	44	0.0187223	Up-regulated
UOX	Pig	5.20549e-07	0.80885	257	208	0.0190235	Up-regulated
JUND	Human	5.33392e-07	2.59644	32	9	0.0194928	Up-regulated
ENSSSCG00000012961	Pig	5.41966e-07	2.29886	34	0.01	0.0198062	Up-regulated
CDH23	Pig	5.90981e-07	2.16496	0.06	27	0.0215974	Up-regulated
PUM1	Human	6.06331e-07	2.3088	0.05	21	0.0221584	Up-regulated
MTFR2	Pig	6.26854e-07	1.48425	34	0.01	0.0229084	Up-regulated
RGS8	Pig	6.37232e-07	0.998336	219	0.17	0.0232876	Up-regulated
HSBP1	Pig	6.51707e-07	1.23602	77	0.04	0.0238166	Up-regulated
FAM124A	Pig	7.0942e-07	1.15237	202	154	0.0259257	Up-regulated
CDV3	Pig	7.23588e-07	0.660958	0.29	241	0.0264435	Up-regulated
ENSSSCG00000034610	Pig	7.58862e-07	2.21041	42	15	0.0277326	Up-regulated
ZDHHC4	Pig	8.11602e-07	0.871979	166	117	0.02966	Up-regulated
GRIP2	Pig	8.55015e-07	1.62388	76	0.04	0.0312465	Up-regulated
RPL35	Pig	8.61415e-07	1.08052	184	138	0.0314804	Up-regulated
SELENOH	Pig	8.77571e-07	1.40295	78	41	0.0320708	Up-regulated
ZNF503	Pig	9.44241e-07	5.65483	14	0	0.0345073	Up-regulated
MCAM	Pig	1.01464e-06	2.50148	44	17	0.0370801	Up-regulated
KCNU1	Pig	1.07112e-06	2.91347	25	5	0.039144	Up-regulated
PTGER4	Pig	1.07944e-06	2.90815	21	3	0.0394482	Up-regulated
UQCRFS1	Pig	1.08307e-06	0.846435	218	168	0.0395809	Up-regulated
NIBAN2	Pig	1.10039e-06	1.72015	51	21	0.0402138	Up-regulated
SPTB	Pig	1.11874e-06	0.62416	495	481	0.0408845	Up-regulated
CDC37L1	Pig	1.12288e-06	0.841368	271	228	0.0410356	Up-regulated
ATP5F1B	Human	1.19279e-06	2.31673	45	18	0.0435904	Up-regulated
PELI2	Pig	1.27453e-06	0.631861	246	195	0.0465778	Up-regulated
PLCZ1	Pig	1.29204e-06	2.04158	39	14	0.0472174	Up-regulated
FLRT2	Pig	1.31746e-06	2.54636	0.03	8	0.0481464	Up-regulated
ENSSSCG00000043144	Pig	1.32336e-06	2.53011	42	16	0.0483622	Up-regulated
MANF	Pig	1.34051e-06	1.3906	47	19	0.0489889	Up-regulated
MRPL27	Pig	1.35361e-06	1.32608	81	44	0.0494677	Up-regulated
CPEB4	Human	1.3675e-06	6.26249	14	0	0.0499753	Up-regulated
ACSS3	Pig	0	-1.71755	779	973	0	Down-regulated
PDE3A	Pig	2.90761e-307	-1.31611	974	989	1.06259e-302	Down-regulated
SLC8A1	Pig	7.83064e-230	-1.16118	969	984	2.86171e-225	Down-regulated
NPPA	Pig	2.01014e-228	-5.62523	9	393	7.34607e-224	Down-regulated
DMD	Pig	1.89446e-208	-0.842992	984	995	6.92329e-204	Down-regulated
DPYD	Pig	2.50244e-204	-2.23571	248	678	9.14517e-200	Down-regulated
CDK6	Pig	5.385e-197	-1.59726	501	866	1.96795e-192	Down-regulated
EHBP1	Pig	4.08257e-195	-1.43341	753	921	1.49198e-190	Down-regulated
TSPAN15	Pig	2.27968e-191	-2.56821	148	577	8.33108e-187	Down-regulated
COX3	Pig	1.14122e-185	-2.48119	106	517	4.17057e-181	Down-regulated
PLOD2	Pig	6.47226e-178	-2.35571	204	629	2.36529e-173	Down-regulated
NAV2	Pig	1.24628e-175	-1.43562	547	879	4.55453e-171	Down-regulated
ADAMTS20	Pig	8.83804e-173	-2.15271	0.16	575	3.22986e-168	Down-regulated
PPFIA2	Pig	2.06733e-169	-1.82195	333	739	7.55505e-165	Down-regulated
COX2	Pig	3.48927e-163	-2.24854	0.13	526	1.27515e-158	Down-regulated
NRXN3	Pig	1.84279e-159	-3.68997	91	439	6.73447e-155	Down-regulated
PDLIM5	Pig	5.82765e-159	-0.544477	979	993	2.12971e-154	Down-regulated
TENM2	Pig	1.38474e-156	-2.17273	288	681	5.06054e-152	Down-regulated
MYBPC3	Pig	1.93295e-150	-1.18884	775	928	7.06397e-146	Down-regulated
ENSSSCG00000027903	Pig	2.7953e-148	-3.30524	63	387	1.02154e-143	Down-regulated
ENSSSCG00000001931	Pig	7.00731e-148	-5.88048	6	268	2.56082e-143	Down-regulated
MALAT1	Human	4.97116e-146	-8.06742	2	254	1.81671e-141	Down-regulated
CAMK2A	Pig	2.05053e-141	-1.43094	377	752	7.49366e-137	Down-regulated
TRPS1	Pig	3.09863e-140	-3.0719	71	386	1.1324e-135	Down-regulated
ENSSSCG00000027725	Pig	2.927e-139	-1.03751	0.82	0.92	1.06967e-134	Down-regulated
BCKDHB	Pig	2.01836e-137	-1.68314	289	645	7.37609e-133	Down-regulated
SLC16A7	Pig	5.62259e-137	-1.41383	397	746	2.05478e-132	Down-regulated
MYL7	Pig	1.33352e-136	-3.74455	19	286	4.87335e-132	Down-regulated
SNAP91	Pig	2.45699e-134	-2.64477	61	366	8.97907e-130	Down-regulated
HK2	Pig	2.13194e-132	-2.1902	121	0.46	7.79117e-128	Down-regulated
ABCA1	Pig	1.95101e-126	-2.4815	97	412	7.12998e-122	Down-regulated
WDR37	Pig	3.26286e-125	-1.26878	328	704	1.19241e-120	Down-regulated
PTPRK	Pig	9.57527e-123	-1.07884	0.69	892	3.49928e-118	Down-regulated
ENSSSCG00000036052	Pig	6.49224e-120	-1.04474	511	816	2.37259e-115	Down-regulated
CACNA2D3	Pig	6.73506e-119	-1.59124	268	612	2.46133e-114	Down-regulated
GAB2	Pig	2.55311e-115	-1.23109	528	802	9.33034e-111	Down-regulated
RFTN1	Pig	2.46614e-110	-1.43836	233	578	9.0125e-106	Down-regulated
XPR1	Pig	3.9929e-105	-1.26364	0.47	762	1.45921e-100	Down-regulated
TEX14	Pig	6.11934e-104	-2.40473	68	332	2.23631e-99	Down-regulated
ATP6	Pig	1.37433e-103	-1.98101	76	353	5.02251e-99	Down-regulated
TMEM135	Pig	2.61863e-102	-1.23647	453	749	9.56979e-98	Down-regulated
RBFOX1	Pig	7.00519e-102	-1.21367	354	669	2.56005e-97	Down-regulated
MYH6	Pig	4.59639e-101	-2.79157	71	329	1.67975e-96	Down-regulated
UVRAG	Pig	7.95192e-101	-1.03398	638	863	2.90603e-96	Down-regulated
SPCS2	Pig	1.14078e-100	-1.64214	224	549	4.16898e-96	Down-regulated
DAPK1	Pig	1.56995e-100	-1.37039	0.23	557	5.7374e-96	Down-regulated
PRKG1	Pig	2.14057e-100	-1.89337	169	465	7.82273e-96	Down-regulated
ENSSSCG00000022925	Pig	9.09295e-100	-1.55283	0.37	676	3.32302e-95	Down-regulated
PCCA	Pig	5.01405e-99	-1.12813	0.43	742	1.83239e-94	Down-regulated
GALNT10	Pig	6.24406e-98	-2.02271	122	408	2.28189e-93	Down-regulated
MAML3	Pig	8.25207e-96	-1.93217	132	416	3.01572e-91	Down-regulated
VEGFA	Pig	3.80281e-95	-1.10715	456	765	1.38974e-90	Down-regulated
ZNF395	Pig	1.27243e-94	-1.71447	188	488	4.65009e-90	Down-regulated
TMEM164	Pig	1.49161e-94	-0.87301	777	902	5.4511e-90	Down-regulated
ACOT11	Pig	5.82357e-92	-1.59448	98	368	2.12822e-87	Down-regulated
CYTB	Pig	7.01008e-92	-3.09769	22	219	2.56184e-87	Down-regulated
SLC44A5	Pig	8.14922e-91	-1.32905	467	0.72	2.97813e-86	Down-regulated
MPP7	Pig	3.75118e-90	-0.839215	622	0.84	1.37087e-85	Down-regulated
ENSSSCG00000033497	Pig	6.80301e-90	-0.780177	722	907	2.48616e-85	Down-regulated
RIN2	Pig	2.66862e-89	-1.74021	136	412	9.75249e-85	Down-regulated
AOPEP	Pig	1.36011e-88	-0.573958	917	978	4.97052e-84	Down-regulated
GLS	Pig	8.02755e-88	-1.22052	567	804	2.93367e-83	Down-regulated
ENO1	Pig	2.34216e-87	-1.27462	417	0.71	8.55942e-83	Down-regulated
COMMD6	Pig	1.41125e-86	-1.07122	783	917	5.15741e-82	Down-regulated
ENSSSCG00000029160	Pig	1.28863e-84	-0.903183	448	748	4.70929e-80	Down-regulated
PDE4B	Pig	4.60784e-84	-1.30161	307	601	1.68394e-79	Down-regulated
COX1	Pig	2.49386e-83	-1.81346	119	381	9.11383e-79	Down-regulated
ENSSSCG00000012262	Pig	7.88113e-83	-0.784968	588	825	2.88016e-78	Down-regulated
ENSSSCG00000006231	Pig	1.73038e-82	-0.843987	0.47	759	6.32368e-78	Down-regulated
APP	Pig	3.74101e-82	-0.955042	463	0.74	1.36715e-77	Down-regulated
NSF	Pig	3.62011e-81	-1.15823	333	626	1.32297e-76	Down-regulated
ENSSSCG00000048263	Pig	6.43062e-81	-1.21099	0.29	592	2.35007e-76	Down-regulated
KIF26B	Pig	1.2591e-80	-1.12546	388	661	4.60137e-76	Down-regulated
NRCAM	Pig	8.49599e-79	-3.39372	16	181	3.10486e-74	Down-regulated
SYCP2	Pig	1.67095e-78	-1.04056	393	688	6.10648e-74	Down-regulated
SMYD3	Pig	4.64906e-78	-0.931348	457	0.74	1.699e-73	Down-regulated
SPRED2	Pig	1.20713e-77	-1.45136	142	407	4.41145e-73	Down-regulated
SNX9	Pig	1.31e-77	-1.13165	355	661	4.78738e-73	Down-regulated
ENSSSCG00000041764	Pig	1.51003e-76	-1.09865	207	494	5.51842e-72	Down-regulated
ADAMTS12	Pig	1.79385e-76	-6.53102	2	0.14	6.55561e-72	Down-regulated
TEAD1	Pig	5.2618e-74	-0.794348	715	876	1.92292e-69	Down-regulated
TNS1	Pig	1.20477e-73	-0.682287	745	908	4.40281e-69	Down-regulated
PRKCE	Pig	4.82164e-73	-1.00107	812	918	1.76207e-68	Down-regulated
CD36	Pig	7.89617e-73	-1.01737	427	702	2.88566e-68	Down-regulated
CCNT1	Pig	9.00004e-73	-0.770121	539	776	3.28906e-68	Down-regulated
MAOB	Pig	6.42583e-72	-1.41795	64	273	2.34832e-67	Down-regulated
ELAPOR2	Pig	3.32819e-71	-1.33957	213	475	1.21629e-66	Down-regulated
PKNOX1	Pig	3.68227e-71	-1.83077	92	313	1.34569e-66	Down-regulated
RFX2	Pig	1.46452e-70	-1.3615	122	0.36	5.35209e-66	Down-regulated
SUGCT	Pig	1.52527e-70	-0.868179	462	747	5.5741e-66	Down-regulated
ENSSSCG00000014600	Pig	5.23007e-70	-2.13733	83	292	1.91133e-65	Down-regulated
AASS	Pig	7.09931e-70	-2.04455	48	237	2.59444e-65	Down-regulated
RORA	Pig	1.17017e-69	-0.989109	475	0.73	4.27639e-65	Down-regulated
ERO1A	Pig	1.79328e-69	-1.33475	418	685	6.55353e-65	Down-regulated
MCC	Pig	7.55228e-69	-1.20079	329	0.59	2.75998e-64	Down-regulated
SSBP3	Pig	3.92248e-68	-1.30801	209	476	1.43347e-63	Down-regulated
GREB1L	Pig	1.65032e-67	-0.894777	343	627	6.0311e-63	Down-regulated
DLG1	Pig	2.82667e-67	-0.680195	712	875	1.03301e-62	Down-regulated
RCAN1	Pig	3.27568e-67	-0.890929	415	694	1.1971e-62	Down-regulated
ENSSSCG00000021322	Pig	4.72097e-67	-1.34501	146	394	1.72528e-62	Down-regulated
ELOVL6	Pig	6.60356e-67	-1.35246	176	0.42	2.41327e-62	Down-regulated
PICALM	Pig	6.69977e-67	-0.987336	0.61	818	2.44843e-62	Down-regulated
MCCC2	Pig	5.70358e-66	-0.968126	221	491	2.08437e-61	Down-regulated
PROS1	Pig	6.64348e-66	-1.16545	241	508	2.42786e-61	Down-regulated
ENSSSCG00000009208	Pig	1.59455e-65	-1.28181	165	415	5.82729e-61	Down-regulated
ARNTL	Pig	2.07814e-65	-1.16155	115	346	7.59456e-61	Down-regulated
SYNJ2	Pig	2.27079e-65	-2.77334	29	187	8.29861e-61	Down-regulated
CD46	Human	7.17116e-65	-0.968092	428	707	2.6207e-60	Down-regulated
PDE4D	Pig	1.17865e-64	-0.787367	956	959	4.30738e-60	Down-regulated
ENSSSCG00000043963	Pig	2.22569e-64	-3.06971	13	151	8.13379e-60	Down-regulated
MYLK3	Pig	2.31946e-64	-0.984061	181	434	8.47648e-60	Down-regulated
SOX6	Pig	2.88089e-64	-0.563131	797	0.91	1.05282e-59	Down-regulated
SND1	Pig	7.46614e-64	-1.28423	234	491	2.7285e-59	Down-regulated
CRIM1	Pig	1.69667e-63	-1.25914	217	472	6.20049e-59	Down-regulated
LOXL2	Pig	1.96413e-62	-2.60992	36	197	7.17791e-58	Down-regulated
DDIT4	Pig	2.80616e-62	-1.61093	302	526	1.02551e-57	Down-regulated
WDFY2	Pig	3.2421e-62	-1.24841	212	0.46	1.18482e-57	Down-regulated
NAV1	Pig	1.07441e-61	-1.55026	0.1	309	3.92642e-57	Down-regulated
CMTM8	Pig	1.12378e-61	-4.10413	9	134	4.10687e-57	Down-regulated
NNT	Pig	3.55712e-61	-0.668164	0.61	829	1.29995e-56	Down-regulated
COQ8A	Pig	7.82978e-60	-0.987397	265	519	2.86139e-55	Down-regulated
FOXN3	Pig	1.83524e-59	-0.807484	543	778	6.7069e-55	Down-regulated
FLNA	Pig	1.21741e-58	-1.05503	255	515	4.44904e-54	Down-regulated
PTPRD	Pig	1.37358e-58	-2.47063	0.04	197	5.01973e-54	Down-regulated
WWTR1	Pig	1.61826e-58	-0.965584	387	637	5.91393e-54	Down-regulated
ENSSSCG00000009125	Pig	1.67646e-58	-0.6476	771	904	6.12662e-54	Down-regulated
ENSSSCG00000003839	Pig	2.73997e-58	-1.58758	101	302	1.00132e-53	Down-regulated
AK4	Pig	7.97361e-58	-1.97016	73	254	2.91395e-53	Down-regulated
CREB3L2	Pig	2.005e-57	-1.61575	104	303	7.32728e-53	Down-regulated
SAMD4A	Pig	4.01435e-57	-0.563154	891	0.96	1.46705e-52	Down-regulated
ENSSSCG00000047344	Pig	4.66782e-57	-1.29698	139	359	1.70585e-52	Down-regulated
ENSSSCG00000045726	Pig	5.65728e-57	-1.99444	32	0.18	2.06745e-52	Down-regulated
LHFPL6	Pig	8.6718e-57	-1.24649	379	599	3.16911e-52	Down-regulated
SNX29	Pig	1.58762e-56	-0.952142	265	0.52	5.80197e-52	Down-regulated
CCNY	Pig	5.21061e-56	-0.752281	0.66	856	1.90422e-51	Down-regulated
SNTB2	Pig	1.05858e-55	-1.42386	123	329	3.86857e-51	Down-regulated
STRN	Pig	3.39582e-55	-0.764652	481	718	1.241e-50	Down-regulated
EEPD1	Pig	3.41111e-55	-1.81615	0.07	245	1.24659e-50	Down-regulated
ENSSSCG00000014242	Pig	6.08189e-55	-1.13	161	387	2.22263e-50	Down-regulated
MCF2L2	Pig	1.36858e-54	-1.02948	156	378	5.00148e-50	Down-regulated
ENSSSCG00000015083	Pig	1.96382e-54	-3.51365	12	0.13	7.17678e-50	Down-regulated
RBMS1	Pig	6.89327e-54	-0.64461	637	829	2.51915e-49	Down-regulated
ENSSSCG00000010053	Pig	1.03362e-53	-0.81507	436	675	3.77738e-49	Down-regulated
PBX1	Pig	2.32212e-53	-0.819856	525	0.72	8.48621e-49	Down-regulated
CAST	Pig	2.46077e-53	-0.684415	741	855	8.9929e-49	Down-regulated
FCHSD2	Pig	4.96898e-53	-0.665134	421	682	1.81591e-48	Down-regulated
CRYBG3	Pig	1.21503e-52	-0.74459	616	798	4.44033e-48	Down-regulated
LDLRAD3	Pig	1.74326e-52	-1.21037	129	334	6.37076e-48	Down-regulated
PAQR9	Pig	2.30036e-52	-1.76207	68	238	8.40668e-48	Down-regulated
ENSSSCG00000017164	Pig	2.68681e-52	-1.33794	201	419	9.81895e-48	Down-regulated
RCBTB1	Pig	3.28936e-52	-1.00694	0.25	491	1.2021e-47	Down-regulated
QDPR	Pig	4.50508e-52	-1.6432	98	283	1.64638e-47	Down-regulated
OGDH	Pig	7.05021e-52	-0.668217	466	729	2.5765e-47	Down-regulated
GBE1	Pig	8.39719e-52	-0.744122	777	916	3.06875e-47	Down-regulated
ENSSSCG00000033654	Pig	1.19013e-51	-1.38468	0.14	344	4.34935e-47	Down-regulated
SNAPC1	Pig	1.27839e-51	-0.83912	446	674	4.67187e-47	Down-regulated
TPM2	Pig	1.33723e-51	-0.619495	518	737	4.8869e-47	Down-regulated
ST8SIA5	Pig	1.55942e-51	-1.27309	76	0.25	5.69891e-47	Down-regulated
ENSSSCG00000043817	Pig	1.83732e-51	-1.79869	74	244	6.71447e-47	Down-regulated
PSD3	Pig	6.17748e-51	-0.982807	289	525	2.25756e-46	Down-regulated
ST3GAL1	Pig	8.00554e-51	-1.48838	96	281	2.92563e-46	Down-regulated
NHSL1	Pig	1.1534e-50	-0.767395	326	579	4.21511e-46	Down-regulated
ENSSSCG00000038455	Pig	1.32946e-50	-0.661216	508	734	4.85849e-46	Down-regulated
CPED1	Pig	1.88712e-50	-0.975956	457	648	6.89647e-46	Down-regulated
ESRRG	Pig	2.06989e-50	-0.641517	556	758	7.5644e-46	Down-regulated
MGAT4A	Pig	2.18406e-50	-0.977867	265	0.5	7.98166e-46	Down-regulated
NM-001206399	Pig	2.87085e-50	-0.737581	321	571	1.04915e-45	Down-regulated
SVEP1	Pig	3.08437e-50	-1.42037	138	337	1.12718e-45	Down-regulated
OXNAD1	Pig	4.23483e-50	-1.01209	186	413	1.54762e-45	Down-regulated
TCTEX1D1	Pig	7.20107e-50	-5.49581	2	93	2.63163e-45	Down-regulated
ANXA5	Pig	1.64961e-49	-1.56782	98	274	6.02849e-45	Down-regulated
KDM4C	Pig	2.26144e-49	-0.65643	623	0.82	8.26442e-45	Down-regulated
PNPLA8	Pig	2.70439e-49	-1.00477	237	461	9.88318e-45	Down-regulated
IL17B	Pig	1.43607e-48	-0.792046	0.34	572	5.24811e-44	Down-regulated
ETV1	Pig	1.59353e-48	-4.59351	5	101	5.82357e-44	Down-regulated
ACO2	Pig	1.75548e-48	-0.635513	516	753	6.41539e-44	Down-regulated
MAMLD1	Pig	1.77371e-48	-1.49791	75	239	6.48201e-44	Down-regulated
HIF3A	Pig	2.38523e-48	-0.832597	277	514	8.71681e-44	Down-regulated
ND4	Pig	4.63763e-48	-2.17914	28	154	1.69482e-43	Down-regulated
MAGI3	Pig	5.35263e-48	-1.10286	229	451	1.95612e-43	Down-regulated
GPC6	Pig	1.23889e-47	-5.65849	1	87	4.52753e-43	Down-regulated
MAP2K1	Pig	1.68857e-47	-1.11749	201	414	6.17087e-43	Down-regulated
TXNRD3	Pig	3.75011e-47	-1.39554	68	229	1.37048e-42	Down-regulated
SASH1	Pig	4.40624e-47	-1.38588	68	225	1.61026e-42	Down-regulated
JARID2	Pig	5.55467e-47	-0.995694	162	374	2.02995e-42	Down-regulated
TET1	Pig	1.11339e-46	-1.7285	59	0.21	4.06887e-42	Down-regulated
DHTKD1	Pig	1.99974e-46	-1.74162	49	191	7.30804e-42	Down-regulated
SLC47A1	Pig	5.61928e-46	-1.19654	0.09	263	2.05357e-41	Down-regulated
CDH11	Pig	5.73583e-46	-6.46959	1	85	2.09616e-41	Down-regulated
CAVIN2	Pig	8.97481e-46	-1.42425	137	323	3.27984e-41	Down-regulated
HACD2	Pig	2.47747e-45	-0.902839	212	0.43	9.05392e-41	Down-regulated
MLLT3	Pig	2.51075e-45	-1.04841	206	417	9.17552e-41	Down-regulated
DMD	Human	3.1262e-45	-1.22162	61	213	1.14247e-40	Down-regulated
ENPP2	Pig	3.75932e-45	-2.16701	36	163	1.37384e-40	Down-regulated
BMP2K	Pig	4.76852e-45	-0.876983	287	523	1.74266e-40	Down-regulated
PLEKHA5	Pig	7.43297e-45	-0.697688	702	837	2.71638e-40	Down-regulated
IL13RA1	Pig	8.69846e-45	-1.36074	141	328	3.17885e-40	Down-regulated
SLC4A4	Pig	1.0743e-44	-0.855725	345	572	3.92602e-40	Down-regulated
NOS2	Pig	1.41939e-44	-0.816861	163	365	5.18717e-40	Down-regulated
ENSSSCG00000003845	Pig	2.53663e-44	-4.12827	7	0.1	9.27011e-40	Down-regulated
ENSSSCG00000024268	Pig	3.48288e-44	-3.07654	12	112	1.27282e-39	Down-regulated
SLC22A15	Pig	4.31647e-44	-1.38853	246	446	1.57746e-39	Down-regulated
EXTL3	Pig	6.2392e-44	-0.636689	363	605	2.28012e-39	Down-regulated
CLASP1	Pig	1.16597e-43	-0.556056	579	791	4.26105e-39	Down-regulated
ENSSSCG00000033648	Pig	1.26086e-43	-1.15639	91	256	4.6078e-39	Down-regulated
PLD1	Pig	1.50254e-43	-0.804096	384	595	5.49104e-39	Down-regulated
BNIP3	Pig	1.7317e-43	-1.05259	242	0.45	6.3285e-39	Down-regulated
TRIOBP	Pig	1.89166e-43	-1.66188	67	216	6.91308e-39	Down-regulated
OSBPL10	Pig	1.98777e-43	-3.1976	17	122	7.26429e-39	Down-regulated
ARNTL2	Pig	2.02542e-43	-2.56597	23	133	7.4019e-39	Down-regulated
ATP2B1	Pig	2.25113e-43	-1.59922	85	244	8.22675e-39	Down-regulated
METTL15	Pig	2.50771e-43	-0.879782	241	457	9.16441e-39	Down-regulated
EGLN3	Pig	3.99763e-43	-0.802679	351	574	1.46093e-38	Down-regulated
PAXBP1	Pig	4.73011e-43	-0.638455	443	676	1.72862e-38	Down-regulated
SETBP1	Pig	6.89112e-43	-0.538605	0.72	0.85	2.51836e-38	Down-regulated
ACSL1	Pig	9.29729e-43	-0.750892	0.37	597	3.3977e-38	Down-regulated
CRYL1	Pig	1.02126e-42	-1.68761	56	196	3.73218e-38	Down-regulated
DTNA	Pig	1.07387e-42	-0.578846	701	831	3.92446e-38	Down-regulated
WWOX	Pig	3.40912e-42	-0.676899	0.44	0.66	1.24586e-37	Down-regulated
ABHD5	Pig	3.948e-42	-1.50728	84	238	1.4428e-37	Down-regulated
RNF165	Pig	4.00421e-42	-3.09439	15	114	1.46334e-37	Down-regulated
TEX49	Pig	9.3772e-42	-0.763951	294	516	3.4269e-37	Down-regulated
FEZ2	Pig	1.12479e-41	-1.25731	82	238	4.11053e-37	Down-regulated
USP9X	Pig	1.23918e-41	-0.706297	341	577	4.52857e-37	Down-regulated
RAB30	Pig	3.60666e-41	-0.730903	299	518	1.31805e-36	Down-regulated
MKNK2	Pig	6.79824e-41	-1.19494	135	0.31	2.48442e-36	Down-regulated
NEK7	Pig	9.75524e-41	-0.569554	583	786	3.56505e-36	Down-regulated
HELB	Pig	1.07799e-40	-1.64882	58	195	3.9395e-36	Down-regulated
ENSSSCG00000001038	Pig	1.16349e-40	-1.22998	108	274	4.25198e-36	Down-regulated
TLK1	Pig	1.50637e-40	-0.579657	0.48	704	5.50502e-36	Down-regulated
PHLPP1	Pig	1.53744e-40	-1.46602	0.08	229	5.61858e-36	Down-regulated
FAM13A	Pig	2.87175e-40	-0.693907	548	754	1.04948e-35	Down-regulated
PKM	Pig	4.95719e-40	-0.590759	0.46	701	1.8116e-35	Down-regulated
ENSSSCG00000014909	Pig	9.32529e-40	-4.32656	12	101	3.40793e-35	Down-regulated
DPP4	Pig	1.13932e-39	-0.623899	294	522	4.16366e-35	Down-regulated
ENSSSCG00000007264	Pig	2.19258e-39	-0.547333	367	598	8.0128e-35	Down-regulated
GRAMD1C	Pig	2.50756e-39	-1.53131	44	167	9.16386e-35	Down-regulated
PPARA	Pig	2.93531e-39	-0.807845	451	661	1.07271e-34	Down-regulated
MROH5	Pig	7.36088e-39	-1.73589	34	148	2.69003e-34	Down-regulated
SEZ6	Pig	8.26117e-39	-2.0201	19	117	3.01904e-34	Down-regulated
UPP1	Pig	8.74112e-39	-3.67152	12	101	3.19444e-34	Down-regulated
LARP1B	Pig	9.05965e-39	-0.666101	192	389	3.31085e-34	Down-regulated
SLC9A1	Pig	1.20065e-38	-1.14476	83	234	4.38777e-34	Down-regulated
PLAGL1	Pig	1.63644e-38	-0.848503	397	598	5.98036e-34	Down-regulated
ARHGEF37	Pig	1.78972e-38	-0.700047	0.14	319	6.54053e-34	Down-regulated
PPM1L	Pig	2.35597e-38	-0.782731	0.29	498	8.60988e-34	Down-regulated
LUZP1	Pig	2.5456e-38	-0.67156	282	503	9.30291e-34	Down-regulated
CKB	Pig	2.75567e-38	-3.16823	14	104	1.00706e-33	Down-regulated
RNF207	Pig	3.91429e-38	-2.12415	14	105	1.43048e-33	Down-regulated
TMTC2	Pig	4.34133e-38	-0.940661	277	475	1.58654e-33	Down-regulated
UNC5B	Pig	5.8238e-38	-2.306	27	132	2.12831e-33	Down-regulated
ENSSSCG00000023014	Pig	6.27221e-38	-1.08924	41	161	2.29218e-33	Down-regulated
ENSSSCG00000011729	Pig	9.00158e-38	-0.723497	242	446	3.28963e-33	Down-regulated
FRMD5	Pig	1.00891e-37	-1.56578	0.08	222	3.68707e-33	Down-regulated
OSBPL1A	Pig	1.20472e-37	-0.634411	482	691	4.40266e-33	Down-regulated
LTBP1	Pig	1.69624e-37	-1.44768	192	364	6.19891e-33	Down-regulated
LHFPL2	Pig	1.79078e-37	-0.804212	0.28	0.49	6.54441e-33	Down-regulated
PDK1	Pig	2.29363e-37	-0.629366	0.32	541	8.38206e-33	Down-regulated
ENSSSCG00000004082	Pig	2.44477e-37	-0.618992	367	582	8.93441e-33	Down-regulated
MAP2K3	Pig	2.50228e-37	-1.0965	109	268	9.14459e-33	Down-regulated
COL18A1	Pig	2.58618e-37	-0.635613	203	405	9.45119e-33	Down-regulated
PHTF2	Pig	3.44563e-37	-0.639596	398	616	1.25921e-32	Down-regulated
IGFBP7	Pig	5.07335e-37	-1.53266	89	232	1.85406e-32	Down-regulated
ITSN1	Pig	1.07204e-36	-0.658523	288	506	3.91777e-32	Down-regulated
ZNF521	Pig	1.56956e-36	-0.733824	377	576	5.73595e-32	Down-regulated
ENSSSCG00000010172	Pig	1.85795e-36	-0.529476	443	664	6.78987e-32	Down-regulated
SEMA4B	Pig	2.74674e-36	-0.529161	0.15	329	1.0038e-31	Down-regulated
KCNT2	Pig	3.6858e-36	-1.76605	51	173	1.34698e-31	Down-regulated
HMOX2	Pig	4.01854e-36	-0.685091	319	524	1.46858e-31	Down-regulated
ABHD18	Pig	9.75485e-36	-0.687293	236	443	3.56491e-31	Down-regulated
CCSER1	Pig	1.02867e-35	-1.83854	77	0.21	3.75928e-31	Down-regulated
RNF149	Pig	1.09643e-35	-0.768684	277	486	4.00689e-31	Down-regulated
AP1S2	Pig	1.36993e-35	-1.18376	85	225	5.00642e-31	Down-regulated
CAMTA1	Pig	2.00164e-35	-0.529678	377	603	7.31499e-31	Down-regulated
ZNF609	Pig	2.18247e-35	-0.621086	406	0.61	7.97584e-31	Down-regulated
NHS	Pig	2.32998e-35	-1.58752	84	219	8.5149e-31	Down-regulated
PFKL	Pig	2.55134e-35	-1.19724	81	221	9.32386e-31	Down-regulated
LGR4	Pig	2.57697e-35	-0.757096	225	416	9.41753e-31	Down-regulated
PRSS55	Pig	2.75644e-35	-0.659776	325	533	1.00734e-30	Down-regulated
AFAP1	Pig	2.79181e-35	-1.14019	128	289	1.02027e-30	Down-regulated
STXBP5	Pig	5.8124e-35	-0.595363	304	514	2.12414e-30	Down-regulated
FOXP2	Pig	6.03345e-35	-0.610521	527	724	2.20493e-30	Down-regulated
SPTLC2	Pig	6.79861e-35	-1.66422	55	177	2.48455e-30	Down-regulated
ENSSSCG00000036595	Pig	7.44704e-35	-1.31554	76	211	2.72152e-30	Down-regulated
FGF1	Pig	7.81824e-35	-0.654263	307	512	2.85717e-30	Down-regulated
TMEM50B	Pig	8.70413e-35	-0.880145	136	304	3.18092e-30	Down-regulated
PFKFB3	Pig	8.85867e-35	-1.77032	39	148	3.2374e-30	Down-regulated
NAALADL2	Pig	1.18812e-34	-1.2678	153	312	4.34198e-30	Down-regulated
RIPOR2	Pig	1.46813e-34	-1.07825	85	226	5.36527e-30	Down-regulated
NEDD4	Pig	4.73028e-34	-2.24598	36	139	1.72868e-29	Down-regulated
CCDC93	Pig	5.29527e-34	-0.502077	473	677	1.93516e-29	Down-regulated
MTARC2	Pig	7.74441e-34	-0.584628	266	467	2.8302e-29	Down-regulated
PID1	Pig	8.84582e-34	-3.95609	1	62	3.23271e-29	Down-regulated
ZNF292	Pig	9.22371e-34	-0.56139	554	757	3.37081e-29	Down-regulated
ENSSSCG00000009338	Pig	9.80578e-34	-0.536789	824	896	3.58352e-29	Down-regulated
KDM5B	Pig	9.92549e-34	-0.670537	361	576	3.62727e-29	Down-regulated
MEIS1	Pig	1.10687e-33	-2.82417	14	95	4.04506e-29	Down-regulated
ZPBP	Pig	1.83868e-33	-1.36274	43	153	6.71946e-29	Down-regulated
CYB5R3	Pig	2.69326e-33	-2.03474	23	115	9.84252e-29	Down-regulated
EPHA4	Pig	3.08531e-33	-2.7468	12	92	1.12753e-28	Down-regulated
CORIN	Pig	4.25566e-33	-0.931899	398	558	1.55523e-28	Down-regulated
KCNQ5	Pig	4.39487e-33	-1.97819	52	164	1.6061e-28	Down-regulated
SLCO5A1	Pig	5.68147e-33	-0.542968	388	0.59	2.07629e-28	Down-regulated
ASB10	Pig	6.66466e-33	-0.825917	81	216	2.4356e-28	Down-regulated
ACSL4	Pig	7.11296e-33	-0.914823	0.26	449	2.59943e-28	Down-regulated
PRSS45P	Pig	7.70734e-33	-2.23073	12	0.09	2.81665e-28	Down-regulated
RAB2A	Pig	8.4428e-33	-0.558423	469	686	3.08542e-28	Down-regulated
GNAI1	Pig	9.40267e-33	-0.947121	159	327	3.43621e-28	Down-regulated
JAKMIP3	Pig	1.12657e-32	-0.920095	118	267	4.11706e-28	Down-regulated
SMURF1	Pig	1.26336e-32	-0.630021	297	497	4.61694e-28	Down-regulated
SPIRE1	Pig	1.35668e-32	-0.640129	338	531	4.95797e-28	Down-regulated
KANSL1L	Pig	2.39758e-32	-0.723687	216	0.4	8.76194e-28	Down-regulated
EPHX1	Pig	2.57389e-32	-0.742208	174	347	9.40627e-28	Down-regulated
HSDL2	Pig	3.85577e-32	-0.588857	243	0.44	1.40909e-27	Down-regulated
RAI2	Pig	4.17368e-32	-0.775679	157	319	1.52527e-27	Down-regulated
ATP2A2	Pig	4.61856e-32	-0.53624	832	887	1.68785e-27	Down-regulated
ANTXR2	Pig	7.70518e-32	-0.707645	319	513	2.81586e-27	Down-regulated
GPR176	Pig	8.88967e-32	-0.783308	223	399	3.24873e-27	Down-regulated
TBC1D8B	Pig	1.0016e-31	-1.59215	44	0.15	3.66036e-27	Down-regulated
HBB	Human	1.14218e-31	-8.15714	0	56	4.1741e-27	Down-regulated
ND1	Pig	1.61584e-31	-2.36182	17	99	5.90507e-27	Down-regulated
UGP2	Pig	1.90602e-31	-1.03983	175	334	6.96554e-27	Down-regulated
BMP1	Pig	2.50788e-31	-0.718246	188	365	9.16505e-27	Down-regulated
EYA4	Pig	2.61357e-31	-0.788938	187	352	9.55129e-27	Down-regulated
ETS2	Pig	2.99534e-31	-0.957162	161	321	1.09465e-26	Down-regulated
CASTOR2	Pig	3.40806e-31	-0.908573	0.09	227	1.24547e-26	Down-regulated
NOL11	Pig	4.13278e-31	-1.90402	63	179	1.51033e-26	Down-regulated
ACSL3	Pig	5.0329e-31	-1.08113	118	264	1.83927e-26	Down-regulated
ENSSSCG00000035037	Pig	5.67081e-31	-1.974	39	139	2.0724e-26	Down-regulated
TAF3	Pig	6.5387e-31	-0.669302	202	382	2.38957e-26	Down-regulated
FAM168A	Pig	1.23737e-30	-0.572001	339	536	4.52198e-26	Down-regulated
EPAS1	Pig	1.57158e-30	-1.37228	79	203	5.74334e-26	Down-regulated
ENSSSCG00000035000	Pig	1.62735e-30	-1.07955	66	184	5.94716e-26	Down-regulated
ENPP1	Pig	1.6829e-30	-1.34627	103	236	6.15014e-26	Down-regulated
C18orf25	Pig	1.76587e-30	-0.557118	358	563	6.45337e-26	Down-regulated
NIBAN1	Pig	1.80188e-30	-0.640284	277	467	6.58498e-26	Down-regulated
ENSSSCG00000002430	Pig	1.92795e-30	-0.957741	121	267	7.04568e-26	Down-regulated
NSUN3	Pig	2.07078e-30	-0.624701	197	374	7.56766e-26	Down-regulated
SERTAD2	Pig	2.5159e-30	-0.98041	144	299	9.19434e-26	Down-regulated
CLYBL	Pig	3.10912e-30	-0.915136	161	318	1.13623e-25	Down-regulated
ADD3	Pig	3.42615e-30	-0.824752	273	453	1.25209e-25	Down-regulated
ENSSSCG00000008012	Pig	4.01072e-30	-1.45488	61	174	1.46572e-25	Down-regulated
MACIR	Pig	4.01221e-30	-1.45857	51	158	1.46626e-25	Down-regulated
LIX1	Pig	8.36877e-30	-1.92375	0.03	121	3.05837e-25	Down-regulated
IL1RAPL2	Pig	9.30437e-30	-1.51901	37	134	3.40028e-25	Down-regulated
BBS9	Pig	1.00474e-29	-1.18218	97	228	3.67183e-25	Down-regulated
CTSH	Pig	1.22904e-29	-4.14208	8	75	4.49151e-25	Down-regulated
DOCK9	Pig	1.4034e-29	-1.31266	104	235	5.12873e-25	Down-regulated
CD55	Human	2.12105e-29	-0.548619	413	636	7.75137e-25	Down-regulated
BMP5	Pig	2.29451e-29	-1.44357	51	156	8.38529e-25	Down-regulated
PPP1R3A	Pig	2.96551e-29	-0.734082	144	299	1.08374e-24	Down-regulated
METTL25	Pig	3.10582e-29	-0.700047	237	416	1.13502e-24	Down-regulated
MREG	Pig	3.39648e-29	-2.02856	16	92	1.24124e-24	Down-regulated
TACR2	Pig	3.6385e-29	-1.87396	22	104	1.32969e-24	Down-regulated
STOX1	Pig	3.9685e-29	-0.970384	61	174	1.45029e-24	Down-regulated
ACTB	Pig	4.52949e-29	-0.597826	358	554	1.6553e-24	Down-regulated
ENSSSCG00000023041	Pig	4.63288e-29	-0.84607	139	286	1.69308e-24	Down-regulated
AUTS2	Pig	6.10262e-29	-0.751588	316	492	2.2302e-24	Down-regulated
IGFBP2	Pig	6.94038e-29	-1.19105	95	222	2.53636e-24	Down-regulated
FNIP1	Pig	8.59169e-29	-0.524678	519	714	3.13983e-24	Down-regulated
TANC2	Pig	9.22639e-29	-0.642417	297	484	3.37179e-24	Down-regulated
RPS6KA5	Pig	9.74157e-29	-0.686801	178	339	3.56006e-24	Down-regulated
FRMD4B	Pig	1.0277e-28	-0.678033	307	489	3.75572e-24	Down-regulated
STT3B	Pig	1.33146e-28	-0.578783	0.38	578	4.86581e-24	Down-regulated
SLC2A4	Pig	1.35277e-28	-0.956138	67	183	4.94369e-24	Down-regulated
TGFBR3	Pig	1.39407e-28	-1.84348	29	117	5.09463e-24	Down-regulated
NWD1	Pig	1.96639e-28	-0.508161	178	343	7.18615e-24	Down-regulated
ENSSSCG00000039144	Pig	1.99594e-28	-1.01398	54	161	7.29417e-24	Down-regulated
NCOA3	Pig	2.20954e-28	-0.674316	0.28	461	8.07476e-24	Down-regulated
VGLL4	Pig	3.06627e-28	-0.616088	304	494	1.12057e-23	Down-regulated
CDS2	Pig	3.20075e-28	-1.14499	0.1	0.23	1.16971e-23	Down-regulated
KCNMA1	Pig	4.25371e-28	-0.628701	591	719	1.55452e-23	Down-regulated
VCAN	Pig	4.43973e-28	-0.66427	349	538	1.6225e-23	Down-regulated
NID1	Pig	4.66801e-28	-0.743202	0.24	412	1.70592e-23	Down-regulated
DACH1	Pig	6.26992e-28	-0.55037	574	717	2.29134e-23	Down-regulated
CHST11	Pig	6.34911e-28	-3.51663	5	64	2.32028e-23	Down-regulated
FAM184B	Pig	8.60651e-28	-1.71124	0.02	98	3.14525e-23	Down-regulated
FLT1	Pig	9.53602e-28	-0.984858	144	286	3.48494e-23	Down-regulated
ZC3H7A	Pig	1.04911e-27	-0.588132	257	444	3.83398e-23	Down-regulated
MED14	Pig	1.16427e-27	-0.575268	0.2	369	4.25482e-23	Down-regulated
SWAP70	Pig	1.22322e-27	-0.801107	161	315	4.47027e-23	Down-regulated
MROH1	Pig	1.26789e-27	-0.916465	79	0.2	4.63351e-23	Down-regulated
PACSIN2	Pig	1.48996e-27	-0.531335	0.54	726	5.44507e-23	Down-regulated
DNAJC6	Pig	1.61828e-27	-1.47895	53	156	5.91401e-23	Down-regulated
ENSSSCG00000010829	Pig	2.2991e-27	-0.500579	119	258	8.40207e-23	Down-regulated
NHLRC3	Pig	2.77788e-27	-0.516126	489	684	1.01518e-22	Down-regulated
HS3ST5	Pig	2.97566e-27	-1.2508	56	0.16	1.08745e-22	Down-regulated
APAF1	Pig	3.95114e-27	-0.984226	132	273	1.44395e-22	Down-regulated
CYTIP	Pig	4.13849e-27	-4.34859	3	56	1.51241e-22	Down-regulated
AMOTL1	Pig	4.83866e-27	-0.829531	158	307	1.76829e-22	Down-regulated
COL5A2	Pig	6.78671e-27	-1.44834	65	171	2.4802e-22	Down-regulated
SLC29A2	Pig	9.55239e-27	-0.947133	59	165	3.49092e-22	Down-regulated
MYLIP	Pig	9.7242e-27	-1.44454	54	156	3.55371e-22	Down-regulated
PDHA1	Pig	9.92292e-27	-0.741358	0.19	352	3.62633e-22	Down-regulated
TMOD3	Pig	1.02464e-26	-0.675731	0.21	377	3.74455e-22	Down-regulated
CTCF	Pig	1.02854e-26	-0.689725	175	331	3.7588e-22	Down-regulated
XYLT1	Pig	1.0949e-26	-0.963225	106	235	4.0013e-22	Down-regulated
TMEM120B	Pig	1.1901e-26	-0.706169	147	295	4.34923e-22	Down-regulated
AFAP1L1	Pig	1.57552e-26	-0.964136	75	0.19	5.75775e-22	Down-regulated
MPZL1	Pig	2.01238e-26	-0.877088	115	0.25	7.35426e-22	Down-regulated
DOK7	Pig	2.41744e-26	-0.56875	0.13	273	8.83452e-22	Down-regulated
CCT6B	Pig	2.61274e-26	-1.48124	53	151	9.54826e-22	Down-regulated
TNNT1	Pig	4.48776e-26	-0.518866	207	372	1.64005e-21	Down-regulated
SCAI	Pig	4.86007e-26	-1.09561	78	193	1.77611e-21	Down-regulated
P3H1	Pig	5.91513e-26	-0.714844	244	415	2.16169e-21	Down-regulated
3,00 NPR	Pig	9.50494e-26	-0.916558	112	0.24	3.47358e-21	Down-regulated
ADAM9	Pig	1.23149e-25	-0.892045	124	257	4.50049e-21	Down-regulated
ROBO2	Pig	1.60011e-25	-1.83325	92	207	5.84761e-21	Down-regulated
PPP4R1	Pig	1.66774e-25	-1.12801	76	187	6.09475e-21	Down-regulated
TGFB1I1	Pig	1.70087e-25	-1.73679	29	0.11	6.21585e-21	Down-regulated
TP53BP2	Pig	2.36835e-25	-0.947547	142	0.28	8.65512e-21	Down-regulated
AVIL	Pig	2.40381e-25	-2.2185	14	79	8.78471e-21	Down-regulated
TRIB3	Pig	2.57001e-25	-3.01271	12	75	9.39211e-21	Down-regulated
ENSSSCG00000006206	Pig	2.94476e-25	-0.628607	201	362	1.07616e-20	Down-regulated
DTWD2	Pig	3.70041e-25	-0.82518	92	212	1.35232e-20	Down-regulated
ASXL3	Pig	4.10144e-25	-0.536129	0.19	345	1.49887e-20	Down-regulated
EPRS1	Pig	4.50429e-25	-0.660179	243	414	1.64609e-20	Down-regulated
PCCB	Pig	7.38998e-25	-1.57447	42	131	2.70067e-20	Down-regulated
ANKRD28	Pig	9.65468e-25	-0.805055	176	323	3.5283e-20	Down-regulated
LAP3	Pig	9.77964e-25	-0.921568	99	221	3.57397e-20	Down-regulated
NEK11	Pig	1.32997e-24	-0.501578	134	0.27	4.86037e-20	Down-regulated
TSPAN18	Pig	1.63509e-24	-1.31073	54	0.15	5.97545e-20	Down-regulated
OLR1	Pig	1.65436e-24	-1.39865	75	183	6.04585e-20	Down-regulated
HIP1	Pig	2.31477e-24	-0.814874	85	0.2	8.45932e-20	Down-regulated
MAPK1	Pig	2.36548e-24	-0.544907	245	418	8.64464e-20	Down-regulated
FGFR1OP2	Pig	2.56157e-24	-0.532245	266	436	9.36126e-20	Down-regulated
REST	Pig	2.92505e-24	-0.794176	135	268	1.06896e-19	Down-regulated
NEDD9	Pig	2.95544e-24	-0.958632	149	282	1.08006e-19	Down-regulated
CNTN5	Pig	3.56659e-24	-1.53651	49	0.14	1.30341e-19	Down-regulated
RNF180	Pig	4.1466e-24	-0.599125	0.29	455	1.51538e-19	Down-regulated
SPAG16	Pig	4.21432e-24	-0.851813	141	271	1.54012e-19	Down-regulated
MBP	Pig	4.37329e-24	-0.572043	78	188	1.59822e-19	Down-regulated
DDX3X	Pig	4.68821e-24	-1.10698	211	354	1.71331e-19	Down-regulated
ND5	Pig	4.92735e-24	-1.85161	17	84	1.8007e-19	Down-regulated
PFKP	Pig	4.95921e-24	-1.11537	62	162	1.81234e-19	Down-regulated
SEMA5A	Pig	5.23505e-24	-0.713708	0.37	526	1.91315e-19	Down-regulated
ENSSSCG00000015390	Pig	6.04369e-24	-5.03881	2	47	2.20867e-19	Down-regulated
ZMYND8	Pig	6.896e-24	-0.50441	359	533	2.52014e-19	Down-regulated
BICD1	Pig	7.18534e-24	-1.44686	45	134	2.62588e-19	Down-regulated
TFB1M	Pig	8.54898e-24	-0.556885	208	365	3.12423e-19	Down-regulated
ARHGAP23	Pig	9.25772e-24	-0.68825	78	186	3.38323e-19	Down-regulated
ENSSSCG00000023771	Pig	1.06445e-23	-1.28263	24	97	3.89001e-19	Down-regulated
ITIH5	Pig	1.41006e-23	-4.38942	2	47	5.15306e-19	Down-regulated
ENSSSCG00000039089	Pig	1.41893e-23	-1.8117	19	87	5.18549e-19	Down-regulated
ENSSSCG00000023850	Pig	1.49355e-23	-0.729064	167	309	5.45819e-19	Down-regulated
MASP2	Pig	1.70206e-23	-1.36225	43	129	6.22018e-19	Down-regulated
USP53	Pig	1.75399e-23	-0.815899	223	371	6.40995e-19	Down-regulated
CTBP2	Pig	1.78764e-23	-0.706583	173	316	6.53293e-19	Down-regulated
MFHAS1	Pig	1.7914e-23	-0.505204	0.36	542	6.54668e-19	Down-regulated
HFM1	Pig	2.00021e-23	-1.07911	84	193	7.30977e-19	Down-regulated
STRBP	Pig	2.39356e-23	-0.520681	221	383	8.74726e-19	Down-regulated
ENSSSCG00000038462	Pig	2.80084e-23	-3.00972	6	58	1.02357e-18	Down-regulated
CCND2	Pig	3.07429e-23	-0.920705	77	184	1.1235e-18	Down-regulated
HDDC2	Pig	4.31941e-23	-1.27301	34	114	1.57853e-18	Down-regulated
ARHGAP12	Pig	5.83444e-23	-0.534118	295	464	2.1322e-18	Down-regulated
ITGAV	Pig	6.22654e-23	-0.546269	579	739	2.27549e-18	Down-regulated
ADAMTS6	Pig	6.40656e-23	-1.18326	197	326	2.34128e-18	Down-regulated
GRPEL2	Pig	7.2193e-23	-0.678363	86	197	2.63829e-18	Down-regulated
ENSSSCG00000040713	Pig	7.86956e-23	-0.660576	118	242	2.87593e-18	Down-regulated
ENSSSCG00000035617	Pig	8.79826e-23	-0.524099	182	323	3.21532e-18	Down-regulated
CNTN3	Pig	9.79018e-23	-2.09467	26	98	3.57782e-18	Down-regulated
MIDEAS	Pig	1.0985e-22	-1.38571	56	148	4.01446e-18	Down-regulated
CNNM2	Pig	1.21803e-22	-0.869871	0.1	216	4.45128e-18	Down-regulated
NOTCH2	Pig	1.47799e-22	-0.910245	151	283	5.40133e-18	Down-regulated
SPRING1	Pig	1.52626e-22	-1.10826	119	237	5.57771e-18	Down-regulated
BCAT2	Pig	1.57714e-22	-0.959805	96	209	5.76365e-18	Down-regulated
FHL2	Pig	1.72857e-22	-0.549022	681	782	6.31707e-18	Down-regulated
CDH9	Pig	1.74318e-22	-2.75133	9	63	6.37045e-18	Down-regulated
PRKD1	Pig	2.15374e-22	-4.79942	1	41	7.87083e-18	Down-regulated
MACROD1	Pig	2.85774e-22	-0.618006	103	221	1.04436e-17	Down-regulated
ENSSSCG00000027763	Pig	3.08075e-22	-0.641103	164	0.3	1.12586e-17	Down-regulated
EVA1C	Pig	3.48569e-22	-0.581743	127	252	1.27384e-17	Down-regulated
ADGRB1	Pig	4.32223e-22	-1.71351	15	76	1.57956e-17	Down-regulated
ABHD17C	Pig	4.41929e-22	-0.552253	86	194	1.61503e-17	Down-regulated
FABP3	Pig	4.46408e-22	-0.716274	341	501	1.6314e-17	Down-regulated
NIM1K	Pig	7.72918e-22	-0.585366	159	293	2.82463e-17	Down-regulated
LRRC7	Pig	1.01313e-21	-0.995808	95	201	3.7025e-17	Down-regulated
EFS	Pig	1.04224e-21	-5.26117	2	45	3.80887e-17	Down-regulated
DIPK1A	Pig	1.2729e-21	-0.570381	196	342	4.65182e-17	Down-regulated
TIMMDC1	Pig	1.302e-21	-0.54567	236	396	4.75816e-17	Down-regulated
FAM133B	Pig	1.47123e-21	-0.571222	193	0.34	5.37661e-17	Down-regulated
PHKA2	Pig	1.57244e-21	-1.01677	43	126	5.74648e-17	Down-regulated
NOVA1	Pig	1.74087e-21	-0.722782	163	296	6.36202e-17	Down-regulated
GOT1	Pig	1.75381e-21	-0.52789	351	519	6.40928e-17	Down-regulated
CLUH	Pig	2.67903e-21	-0.649595	159	293	9.79052e-17	Down-regulated
ENSSSCG00000016542	Pig	3.09318e-21	-0.529523	193	339	1.1304e-16	Down-regulated
ENSSSCG00000012362	Pig	3.68352e-21	-1.71799	19	81	1.34614e-16	Down-regulated
MGST1	Pig	4.03617e-21	-0.617764	146	273	1.47502e-16	Down-regulated
ENSSSCG00000041499	Pig	4.92362e-21	-2.22068	0.01	62	1.79934e-16	Down-regulated
ATRNL1	Pig	5.1012e-21	-1.79597	39	115	1.86423e-16	Down-regulated
LRRC9	Pig	6.4801e-21	-0.791291	92	199	2.36815e-16	Down-regulated
REXO2	Pig	6.59494e-21	-0.841308	273	419	2.41012e-16	Down-regulated
SLC9B1	Pig	7.02786e-21	-0.576959	146	273	2.56833e-16	Down-regulated
MYO6	Pig	7.38238e-21	-0.545698	0.2	346	2.69789e-16	Down-regulated
FAM20A	Pig	7.66039e-21	-1.17886	33	106	2.79949e-16	Down-regulated
NUP188	Pig	9.20315e-21	-0.501713	178	318	3.36329e-16	Down-regulated
ENSSSCG00000038708	Pig	9.98557e-21	-0.717571	174	307	3.64922e-16	Down-regulated
SH3KBP1	Pig	1.08197e-20	-0.859433	101	209	3.95406e-16	Down-regulated
FBLIM1	Pig	1.15088e-20	-0.532646	86	0.19	4.20589e-16	Down-regulated
ADARB2	Pig	1.29091e-20	-1.24697	43	123	4.71763e-16	Down-regulated
PDZRN4	Pig	1.29837e-20	-1.60786	21	84	4.74491e-16	Down-regulated
MAN2A1	Pig	1.47402e-20	-0.635928	212	352	5.38681e-16	Down-regulated
LENG8	Pig	1.49213e-20	-0.592398	183	323	5.45299e-16	Down-regulated
ORC5	Pig	1.51908e-20	-0.715619	152	278	5.55146e-16	Down-regulated
ETS1	Pig	1.70498e-20	-1.84521	35	108	6.23086e-16	Down-regulated
NDFIP1	Pig	1.89216e-20	-0.660803	285	436	6.91491e-16	Down-regulated
PITPNB	Pig	1.91961e-20	-0.672864	153	282	7.01523e-16	Down-regulated
PRIM2	Pig	1.94049e-20	-1.25451	48	0.13	7.09154e-16	Down-regulated
SMAD6	Pig	2.17781e-20	-0.776302	111	222	7.95881e-16	Down-regulated
NXN	Pig	2.61186e-20	-1.13996	79	177	9.54504e-16	Down-regulated
CNOT10	Pig	3.19584e-20	-0.773825	124	0.24	1.16792e-15	Down-regulated
AMMECR1	Pig	3.52364e-20	-0.545841	238	0.39	1.28771e-15	Down-regulated
SLC5A2	Pig	3.69191e-20	-5.78408	1	37	1.34921e-15	Down-regulated
SYNE3	Pig	3.75783e-20	-1.20285	51	133	1.3733e-15	Down-regulated
CEP83	Pig	4.39318e-20	-0.68238	131	0.25	1.60549e-15	Down-regulated
RNF217	Pig	4.73108e-20	-0.826055	151	274	1.72897e-15	Down-regulated
APOBEC2	Pig	4.8512e-20	-0.530574	235	381	1.77287e-15	Down-regulated
ENSSSCG00000038202	Pig	4.95555e-20	-0.850216	72	166	1.81101e-15	Down-regulated
NFXL1	Pig	6.21744e-20	-0.863011	99	205	2.27216e-15	Down-regulated
APBB2	Pig	6.36218e-20	-0.634517	0.29	452	2.32506e-15	Down-regulated
KCNIP4	Pig	6.44225e-20	-1.06721	64	151	2.35432e-15	Down-regulated
ANXA11	Pig	8.02839e-20	-0.548028	216	359	2.93397e-15	Down-regulated
VEGFA	Human	8.08842e-20	-0.586006	131	248	2.95591e-15	Down-regulated
PRKAG2	Pig	9.45145e-20	-0.511215	0.41	574	3.45403e-15	Down-regulated
DNER	Pig	9.47982e-20	-1.20887	45	124	3.4644e-15	Down-regulated
ENSSSCG00000045565	Pig	9.97291e-20	-1.16191	33	104	3.6446e-15	Down-regulated
KLHL5	Pig	1.00925e-19	-1.93533	36	107	3.68831e-15	Down-regulated
ND2	Pig	1.0277e-19	-1.75535	12	64	3.75574e-15	Down-regulated
PPP5C	Pig	1.54795e-19	-0.88952	62	0.15	5.65697e-15	Down-regulated
ENSSSCG00000007733	Pig	1.70293e-19	-0.537931	129	249	6.22337e-15	Down-regulated
PEX1	Pig	1.88736e-19	-0.826221	0.09	192	6.89735e-15	Down-regulated
PDGFD	Pig	1.91292e-19	-1.90098	16	72	6.99075e-15	Down-regulated
P4HB	Pig	2.23562e-19	-1.56482	54	135	8.17006e-15	Down-regulated
PLA2G4A	Pig	3.27541e-19	-1.525	44	119	1.197e-14	Down-regulated
LYPD6B	Pig	3.64064e-19	-3.14889	4	44	1.33047e-14	Down-regulated
MAGI2	Pig	3.94776e-19	-1.98396	33	0.1	1.44271e-14	Down-regulated
ENSSSCG00000032877	Pig	4.0981e-19	-0.551399	108	217	1.49765e-14	Down-regulated
CCDC83	Pig	4.11907e-19	-3.4118	6	0.05	1.50532e-14	Down-regulated
ITPK1	Pig	4.77124e-19	-0.766349	85	181	1.74365e-14	Down-regulated
FOXO1	Pig	4.92095e-19	-0.580551	262	404	1.79836e-14	Down-regulated
ENSSSCG00000031365	Pig	5.02803e-19	-2.03525	12	63	1.83749e-14	Down-regulated
TTLL5	Pig	5.34184e-19	-0.582656	173	302	1.95217e-14	Down-regulated
WFDC1	Pig	5.52922e-19	-1.17287	62	147	2.02065e-14	Down-regulated
PLCXD3	Pig	5.64376e-19	-1.77491	22	82	2.06251e-14	Down-regulated
GOLPH3L	Pig	5.74276e-19	-1.05733	61	147	2.09869e-14	Down-regulated
EFHD1	Pig	5.7959e-19	-1.94689	7	51	2.11811e-14	Down-regulated
SRGAP1	Pig	6.20505e-19	-2.17395	18	75	2.26763e-14	Down-regulated
1,00 PGK	Pig	6.69238e-19	-0.620861	178	304	2.44573e-14	Down-regulated
POGLUT1	Pig	6.78452e-19	-0.743978	85	183	2.4794e-14	Down-regulated
ENSSSCG00000032297	Pig	8.26956e-19	-1.01012	44	121	3.02211e-14	Down-regulated
GARS1	Pig	8.94566e-19	-0.879882	0.13	239	3.26919e-14	Down-regulated
SCRN1	Pig	8.94724e-19	-1.8808	11	0.06	3.26977e-14	Down-regulated
ELF1	Pig	8.97602e-19	-0.50997	231	378	3.28029e-14	Down-regulated
BNIP3L	Pig	9.52232e-19	-0.803976	119	228	3.47993e-14	Down-regulated
ENSSSCG00000046579	Pig	1.07076e-18	-0.593223	151	0.27	3.9131e-14	Down-regulated
NRIP1	Pig	1.14574e-18	-0.51314	248	393	4.18711e-14	Down-regulated
BRWD3	Pig	1.25269e-18	-0.609134	165	292	4.57796e-14	Down-regulated
MCU	Pig	1.4578e-18	-0.507599	313	0.46	5.32754e-14	Down-regulated
ENSSSCG00000033649	Pig	1.51514e-18	-0.641868	96	198	5.53708e-14	Down-regulated
RTN2	Pig	1.52189e-18	-0.592633	84	182	5.56174e-14	Down-regulated
CEP89	Pig	1.55506e-18	-0.676034	85	182	5.68295e-14	Down-regulated
ENSSSCG00000048408	Pig	1.71979e-18	-0.552783	0.15	271	6.28499e-14	Down-regulated
ENSSSCG00000035371	Pig	1.81919e-18	-3.2194	5	46	6.64823e-14	Down-regulated
CTH	Pig	1.9531e-18	-1.47417	22	82	7.1376e-14	Down-regulated
11,00 ARL	Pig	2.58898e-18	-1.63036	25	86	9.46144e-14	Down-regulated
ENSSSCG00000006213	Pig	2.69012e-18	-1.05814	31	97	9.83103e-14	Down-regulated
MYO1F	Pig	2.92343e-18	-1.18544	44	118	1.06837e-13	Down-regulated
NARS1	Pig	3.5671e-18	-0.5782	175	303	1.3036e-13	Down-regulated
MAGT1	Pig	4.05285e-18	-0.620909	141	0.26	1.48112e-13	Down-regulated
JDP2	Pig	4.37407e-18	-1.09725	35	103	1.59851e-13	Down-regulated
OAZ2	Pig	4.56932e-18	-0.54009	117	225	1.66986e-13	Down-regulated
USP37	Pig	4.58681e-18	-0.583348	204	337	1.67625e-13	Down-regulated
PCSK6	Pig	5.24227e-18	-0.55886	275	0.42	1.91579e-13	Down-regulated
LONP1	Pig	5.72533e-18	-1.48867	38	107	2.09232e-13	Down-regulated
EIF2AK3	Pig	6.85892e-18	-0.556896	238	379	2.50659e-13	Down-regulated
TPMT	Pig	7.74776e-18	-1.65139	14	64	2.83142e-13	Down-regulated
UFM1	Pig	7.90073e-18	-1.17033	96	191	2.88732e-13	Down-regulated
PDIA3	Pig	9.06822e-18	-0.960586	103	201	3.31398e-13	Down-regulated
RASGRP3	Pig	9.53058e-18	-7.10045	0	0.03	3.48295e-13	Down-regulated
CSRNP3	Pig	1.03647e-17	-1.20915	0.04	0.11	3.78778e-13	Down-regulated
SNX8	Pig	1.09908e-17	-0.552991	141	254	4.01658e-13	Down-regulated
GOLM1	Pig	1.10735e-17	-0.922028	77	166	4.04682e-13	Down-regulated
SYCP2L	Pig	1.12117e-17	-2.0155	14	64	4.0973e-13	Down-regulated
ZBTB7C	Pig	1.16021e-17	-1.88574	36	103	4.23998e-13	Down-regulated
GBA2	Pig	1.23078e-17	-0.699529	86	0.18	4.49789e-13	Down-regulated
ZEB2	Pig	1.42818e-17	-0.597745	222	354	5.21928e-13	Down-regulated
ADCY8	Pig	1.65307e-17	-1.71212	24	83	6.04116e-13	Down-regulated
TBC1D32	Pig	1.78767e-17	-0.567926	199	327	6.53304e-13	Down-regulated
MAK	Pig	2.2288e-17	-1.67755	22	77	8.14516e-13	Down-regulated
DAPL1	Pig	2.50672e-17	-1.69762	8	0.05	9.16081e-13	Down-regulated
UGDH	Pig	2.68376e-17	-1.21744	45	117	9.80779e-13	Down-regulated
NUDT6	Pig	3.21802e-17	-0.594488	153	0.27	1.17603e-12	Down-regulated
CCDC61	Pig	3.46076e-17	-1.08464	46	118	1.26473e-12	Down-regulated
MYLK	Pig	3.57528e-17	-1.99795	17	69	1.30659e-12	Down-regulated
BDH1	Pig	3.63081e-17	-0.701481	69	153	1.32688e-12	Down-regulated
ENTPD4	Pig	4.00808e-17	-0.808944	79	167	1.46475e-12	Down-regulated
KLHDC4	Pig	4.44114e-17	-0.851511	45	117	1.62302e-12	Down-regulated
STK11	Pig	6.34093e-17	-0.588288	93	189	2.31729e-12	Down-regulated
MYO10	Pig	6.4257e-17	-1.8523	24	0.08	2.34827e-12	Down-regulated
GCH1	Pig	6.47937e-17	-1.1999	43	112	2.36789e-12	Down-regulated
ND3	Pig	6.64195e-17	-3.39604	3	37	2.4273e-12	Down-regulated
NMRAL1	Pig	8.20488e-17	-0.56145	249	377	2.99847e-12	Down-regulated
PRC1	Pig	8.76345e-17	-1.9163	14	62	3.2026e-12	Down-regulated
ENSSSCG00000033987	Pig	1.0095e-16	-0.661323	143	0.25	3.6892e-12	Down-regulated
KDM2B	Pig	1.16189e-16	-0.704719	66	148	4.24611e-12	Down-regulated
MDFIC	Pig	1.4179e-16	-1.5816	35	98	5.18172e-12	Down-regulated
GSTK1	Pig	1.67508e-16	-1.03008	56	132	6.12157e-12	Down-regulated
ANTXR1	Pig	1.91034e-16	-1.70639	19	72	6.98133e-12	Down-regulated
MAP3K1	Pig	1.93892e-16	-0.871592	119	217	7.08579e-12	Down-regulated
ENSSSCG00000046153	Pig	2.07898e-16	-1.01844	41	107	7.59762e-12	Down-regulated
SLCO2A1	Pig	2.36111e-16	-1.21123	42	109	8.62869e-12	Down-regulated
ISM1	Pig	2.46366e-16	-3.33392	3	37	9.00346e-12	Down-regulated
CCDC62	Pig	3.004e-16	-1.00778	63	142	1.09781e-11	Down-regulated
PDSS2	Pig	3.03157e-16	-0.584258	179	295	1.10789e-11	Down-regulated
TASP1	Pig	3.08935e-16	-0.563504	267	403	1.129e-11	Down-regulated
MAD1L1	Pig	3.78783e-16	-0.773311	0.09	0.18	1.38426e-11	Down-regulated
TRAM2	Pig	4.68047e-16	-1.11188	57	131	1.71048e-11	Down-regulated
CARS1	Pig	5.06726e-16	-0.967399	0.07	149	1.85183e-11	Down-regulated
MVP	Pig	5.70354e-16	-0.540295	103	199	2.08436e-11	Down-regulated
IL25	Pig	6.13295e-16	-4.69975	2	32	2.24129e-11	Down-regulated
PTPDC1	Pig	6.16125e-16	-0.502684	141	251	2.25163e-11	Down-regulated
RBMS2	Pig	6.19612e-16	-0.627731	82	169	2.26437e-11	Down-regulated
ENSSSCG00000011851	Pig	6.23498e-16	-0.584702	58	134	2.27857e-11	Down-regulated
ENSSSCG00000010968	Pig	6.323e-16	-1.23074	32	93	2.31074e-11	Down-regulated
DGKB	Pig	6.36238e-16	-1.84399	21	73	2.32513e-11	Down-regulated
HEY2	Pig	7.67806e-16	-0.61691	117	218	2.80595e-11	Down-regulated
PRELID2	Pig	8.07303e-16	-0.660902	127	0.23	2.95029e-11	Down-regulated
IGF2BP2	Pig	8.71566e-16	-0.57342	242	366	3.18514e-11	Down-regulated
C8orf76	Pig	1.01208e-15	-0.815322	56	0.13	3.69864e-11	Down-regulated
RAB31	Pig	1.2723e-15	-0.841263	81	166	4.64963e-11	Down-regulated
ENSSSCG00000018046	Pig	1.28988e-15	-1.50564	21	73	4.71386e-11	Down-regulated
IQCM	Pig	1.31457e-15	-0.905178	68	146	4.80408e-11	Down-regulated
TMEM40	Pig	1.33073e-15	-2.0816	9	48	4.86315e-11	Down-regulated
H2BC21	Pig	1.3795e-15	-0.800148	111	204	5.0414e-11	Down-regulated
BAIAP2L1	Pig	1.65285e-15	-0.643169	68	147	6.04034e-11	Down-regulated
TTK	Pig	1.7125e-15	-1.38908	16	63	6.25832e-11	Down-regulated
OSMR	Pig	1.71377e-15	-1.04319	76	156	6.26296e-11	Down-regulated
ATL1	Pig	2.053e-15	-1.08251	34	93	7.50269e-11	Down-regulated
SERHL2	Pig	2.07173e-15	-1.38077	14	59	7.57113e-11	Down-regulated
FAM13C	Pig	2.68738e-15	-0.677529	102	195	9.82102e-11	Down-regulated
FAM171A1	Pig	2.7285e-15	-3.00884	8	47	9.97131e-11	Down-regulated
GRIN2A	Pig	2.76369e-15	-0.546059	109	202	1.00999e-10	Down-regulated
SLIT2	Pig	2.78229e-15	-2.38897	19	67	1.01679e-10	Down-regulated
PTPN2	Pig	2.83459e-15	-0.554869	145	252	1.0359e-10	Down-regulated
ENSSSCG00000028635	Pig	3.90932e-15	-0.643523	88	174	1.42866e-10	Down-regulated
CMBL	Pig	4.13122e-15	-0.501546	71	151	1.50975e-10	Down-regulated
SLF1	Pig	4.35922e-15	-0.715299	66	144	1.59308e-10	Down-regulated
FBH1	Pig	4.82522e-15	-0.516962	115	212	1.76338e-10	Down-regulated
DNMBP	Pig	5.21402e-15	-0.627474	74	154	1.90546e-10	Down-regulated
HMGXB3	Pig	5.37888e-15	-0.63399	0.1	191	1.96571e-10	Down-regulated
SYAP1	Pig	5.88069e-15	-0.789036	78	159	2.1491e-10	Down-regulated
MYO1H	Pig	6.49495e-15	-1.31103	24	77	2.37358e-10	Down-regulated
STX6	Pig	6.61184e-15	-0.639737	214	0.33	2.4163e-10	Down-regulated
CEP250	Pig	9.47078e-15	-0.52935	102	193	3.4611e-10	Down-regulated
PGRMC1	Pig	1.02928e-14	-0.56209	147	253	3.7615e-10	Down-regulated
RNF157	Pig	1.08803e-14	-0.744053	55	125	3.97622e-10	Down-regulated
STK33	Pig	1.18419e-14	-1.67088	15	0.06	4.32761e-10	Down-regulated
GRIA3	Pig	1.20119e-14	-0.620973	105	196	4.38975e-10	Down-regulated
SLC25A33	Pig	1.21403e-14	-0.875264	91	174	4.43666e-10	Down-regulated
HBA2	Human	1.24408e-14	-3.17902	2	31	4.54648e-10	Down-regulated
MAPRE1	Pig	1.26356e-14	-0.642731	135	234	4.61769e-10	Down-regulated
TIMM44	Pig	1.37177e-14	-0.809124	57	128	5.01314e-10	Down-regulated
MSANTD3-TMEFF1	Pig	1.40995e-14	-0.527404	144	245	5.15265e-10	Down-regulated
GPX3	Pig	1.68595e-14	-2.18898	19	66	6.16129e-10	Down-regulated
KPNA7	Pig	1.68804e-14	-0.631238	86	169	6.16893e-10	Down-regulated
USP12	Pig	2.03059e-14	-0.577553	98	186	7.42078e-10	Down-regulated
CEP192	Pig	2.06798e-14	-0.504241	131	232	7.55744e-10	Down-regulated
PDXK	Pig	2.40551e-14	-3.34004	4	35	8.79093e-10	Down-regulated
UXS1	Pig	2.56944e-14	-0.661647	127	223	9.39002e-10	Down-regulated
TMC1	Pig	2.63437e-14	-0.701518	58	127	9.62729e-10	Down-regulated
LPIN2	Pig	2.71575e-14	-0.77865	84	164	9.92469e-10	Down-regulated
PRLR	Pig	2.74158e-14	-1.60244	13	55	1.00191e-09	Down-regulated
FOXK1	Pig	2.82993e-14	-0.570511	101	189	1.0342e-09	Down-regulated
FAM110C	Pig	2.86574e-14	-0.589556	104	192	1.04729e-09	Down-regulated
SSX2IP	Pig	2.90422e-14	-1.23659	35	92	1.06135e-09	Down-regulated
SRRM1	Human	2.9269e-14	-1.37005	14	57	1.06964e-09	Down-regulated
MAFF	Pig	3.16661e-14	-2.23954	8	44	1.15724e-09	Down-regulated
ENSSSCG00000033089	Pig	3.22813e-14	-2.31149	8	44	1.17972e-09	Down-regulated
RANBP6	Pig	3.24098e-14	-0.604638	245	0.36	1.18442e-09	Down-regulated
KIAA1549L	Pig	3.98099e-14	-1.10448	29	83	1.45485e-09	Down-regulated
ENSSSCG00000039085	Pig	4.10059e-14	-0.561517	137	237	1.49856e-09	Down-regulated
OAZ3	Pig	4.65854e-14	-4.9782	1	26	1.70246e-09	Down-regulated
ENSSSCG00000007088	Pig	5.11729e-14	-0.723318	96	182	1.87011e-09	Down-regulated
SPIDR	Pig	5.37708e-14	-0.62363	87	168	1.96506e-09	Down-regulated
NYX	Pig	6.53766e-14	-1.60891	12	51	2.38919e-09	Down-regulated
CDC7	Pig	6.54668e-14	-1.02098	39	99	2.39249e-09	Down-regulated
POLDIP3	Pig	7.34415e-14	-0.626906	63	135	2.68392e-09	Down-regulated
PTBP3	Pig	7.44672e-14	-0.545207	162	264	2.7214e-09	Down-regulated
FMNL2	Pig	7.56095e-14	-2.89418	3	33	2.76315e-09	Down-regulated
ENPEP	Pig	7.93483e-14	-1.58348	19	64	2.89978e-09	Down-regulated
PPARD	Pig	8.89559e-14	-0.803547	0.06	0.13	3.25089e-09	Down-regulated
RAB22A	Pig	9.15876e-14	-0.662234	95	177	3.34707e-09	Down-regulated
TPPP	Pig	9.42456e-14	-1.2482	12	51	3.44421e-09	Down-regulated
VWC2	Pig	1.02869e-13	-0.775547	29	0.08	3.75934e-09	Down-regulated
ITGA1	Pig	1.10587e-13	-1.68784	14	55	4.0414e-09	Down-regulated
ITPRID2	Pig	1.12968e-13	-0.595736	114	203	4.12841e-09	Down-regulated
KIAA0930	Pig	1.38932e-13	-0.559424	84	163	5.07727e-09	Down-regulated
KDM1B	Pig	1.40547e-13	-0.662564	0.08	159	5.13629e-09	Down-regulated
NCAPG	Pig	1.41002e-13	-1.70641	16	58	5.1529e-09	Down-regulated
MCF2L	Pig	1.45486e-13	-0.54965	73	149	5.31677e-09	Down-regulated
PNKP	Pig	1.48621e-13	-0.980506	37	95	5.43136e-09	Down-regulated
COX18	Pig	1.52224e-13	-0.586554	108	196	5.56303e-09	Down-regulated
SMIM14	Pig	1.76798e-13	-0.608734	153	252	6.46107e-09	Down-regulated
phTBM	Pig	2.00926e-13	-4.91113	1	25	7.34284e-09	Down-regulated
ENSSSCG00000043835	Pig	2.17418e-13	-0.708895	89	167	7.94553e-09	Down-regulated
SLC25A28	Pig	2.20735e-13	-1.2948	51	114	8.06676e-09	Down-regulated
ACADVL	Pig	2.2585e-13	-0.557155	102	188	8.2537e-09	Down-regulated
OS9	Pig	2.44383e-13	-0.829532	62	131	8.93098e-09	Down-regulated
ENSSSCG00000009633	Pig	2.50108e-13	-1.67419	37	92	9.1402e-09	Down-regulated
ENSSSCG00000026229	Pig	3.28768e-13	-0.836659	54	119	1.20148e-08	Down-regulated
P3H2	Pig	3.59787e-13	-3.03547	5	36	1.31484e-08	Down-regulated
NFE2L1	Pig	3.68422e-13	-0.900367	85	0.16	1.3464e-08	Down-regulated
PDIA5	Pig	4.30025e-13	-0.608972	98	181	1.57152e-08	Down-regulated
MBOAT1	Pig	4.31886e-13	-0.780797	84	0.16	1.57833e-08	Down-regulated
RTTN	Pig	4.32883e-13	-0.71543	68	138	1.58197e-08	Down-regulated
FPGS	Pig	4.41249e-13	-0.623899	44	105	1.61254e-08	Down-regulated
ENSSSCG00000029857	Pig	4.4499e-13	-0.831357	58	125	1.62622e-08	Down-regulated
ENSSSCG00000016527	Pig	4.48086e-13	-0.607609	56	121	1.63753e-08	Down-regulated
EDA	Pig	4.78741e-13	-3.25615	7	0.04	1.74956e-08	Down-regulated
ENSSSCG00000038679	Pig	5.54913e-13	-1.7601	17	0.06	2.02793e-08	Down-regulated
INTS13	Pig	5.92117e-13	-0.607592	118	208	2.16389e-08	Down-regulated
TTL	Pig	6.15034e-13	-0.758399	54	118	2.24764e-08	Down-regulated
ENSSSCG00000015645	Pig	6.18201e-13	-0.599454	108	192	2.25922e-08	Down-regulated
GNB1L	Pig	6.68389e-13	-0.571172	66	135	2.44263e-08	Down-regulated
FZD3	Pig	6.70078e-13	-0.57245	44	103	2.4488e-08	Down-regulated
ENSSSCG00000037274	Pig	6.74554e-13	-1.47169	24	0.07	2.46516e-08	Down-regulated
MEAK7	Pig	7.20364e-13	-0.871247	34	88	2.63257e-08	Down-regulated
SMO	Pig	7.30132e-13	-0.557737	54	117	2.66827e-08	Down-regulated
GJC1	Pig	7.35933e-13	-1.25969	44	102	2.68947e-08	Down-regulated
SEC61A1	Pig	7.63736e-13	-0.963683	61	128	2.79107e-08	Down-regulated
CC2D2A	Pig	7.71237e-13	-1.12998	43	101	2.81849e-08	Down-regulated
MRPL48	Pig	8.43619e-13	-0.630075	59	125	3.08301e-08	Down-regulated
ENSSSCG00000029257	Pig	9.91002e-13	-1.36151	27	75	3.62162e-08	Down-regulated
SLC25A15	Pig	1.00132e-12	-1.05166	41	98	3.65933e-08	Down-regulated
CYP7B1	Pig	1.22288e-12	-2.94105	3	0.03	4.46901e-08	Down-regulated
SOAT1	Pig	1.25302e-12	-1.39784	0.02	64	4.57917e-08	Down-regulated
SSH1	Pig	1.53265e-12	-0.518689	114	0.2	5.60109e-08	Down-regulated
SRRM4	Pig	1.56923e-12	-0.984649	53	114	5.73474e-08	Down-regulated
ZCCHC9	Pig	1.59088e-12	-0.739358	86	0.16	5.81386e-08	Down-regulated
PC	Pig	1.66225e-12	-1.14929	12	48	6.07469e-08	Down-regulated
CEP43	Pig	1.71083e-12	-0.741803	37	91	6.25225e-08	Down-regulated
GNE	Pig	1.92546e-12	-1.05039	39	94	7.03659e-08	Down-regulated
TCF25	Pig	2.1429e-12	-0.641121	121	208	7.83122e-08	Down-regulated
C3orf62	Pig	2.48299e-12	-0.805968	34	86	9.07409e-08	Down-regulated
DMP1	Pig	2.48758e-12	-1.06197	44	101	9.09088e-08	Down-regulated
ENSSSCG00000007188	Pig	2.49867e-12	-0.579973	164	261	9.1314e-08	Down-regulated
CLCN5	Pig	2.76402e-12	-0.529301	102	184	1.01011e-07	Down-regulated
LPCAT3	Pig	2.82086e-12	-0.891564	43	99	1.03088e-07	Down-regulated
MAP6	Pig	3.00119e-12	-2.5259	6	36	1.09678e-07	Down-regulated
TENM1	Pig	3.29759e-12	-0.792786	68	134	1.2051e-07	Down-regulated
DNAJC15	Pig	3.30105e-12	-0.671864	109	0.19	1.20637e-07	Down-regulated
BICDL1	Pig	3.48345e-12	-1.5599	17	56	1.27303e-07	Down-regulated
DCBLD2	Pig	3.52704e-12	-0.902442	73	142	1.28896e-07	Down-regulated
TNXB	Pig	3.85637e-12	-1.82502	17	57	1.40931e-07	Down-regulated
FAM81A	Pig	3.88757e-12	-0.62324	37	0.09	1.42071e-07	Down-regulated
ASNS	Pig	3.95808e-12	-0.630779	132	221	1.44648e-07	Down-regulated
HPRT1	Pig	4.08199e-12	-0.817529	77	147	1.49176e-07	Down-regulated
LRRC75A	Pig	4.20666e-12	-1.58113	9	42	1.53732e-07	Down-regulated
RASGEF1B	Pig	4.6736e-12	-2.16031	0.01	43	1.70797e-07	Down-regulated
PPIP5K1	Pig	4.6834e-12	-0.571926	0.11	193	1.71155e-07	Down-regulated
TRMT10A	Pig	4.72051e-12	-0.530598	135	225	1.72511e-07	Down-regulated
IRS1	Pig	5.3302e-12	-0.76781	0.08	151	1.94792e-07	Down-regulated
COL1A1	Pig	5.73343e-12	-6.6878	0	0.02	2.09528e-07	Down-regulated
SMARCC2	Pig	5.80157e-12	-0.749428	79	149	2.12018e-07	Down-regulated
ENSSSCG00000004441	Pig	5.80909e-12	-3.5428	4	31	2.12293e-07	Down-regulated
SLC6A13	Pig	6.0279e-12	-1.44101	17	57	2.2029e-07	Down-regulated
PNKD	Pig	6.36228e-12	-0.615319	111	192	2.3251e-07	Down-regulated
NUP160	Pig	6.69499e-12	-0.766564	39	93	2.44668e-07	Down-regulated
SHQ1	Pig	6.89881e-12	-0.622063	117	0.2	2.52117e-07	Down-regulated
ENSSSCG00000038187	Pig	6.92298e-12	-1.12089	56	116	2.53e-07	Down-regulated
STK38	Pig	7.05712e-12	-0.63444	0.15	242	2.57903e-07	Down-regulated
CYTH1	Pig	7.12716e-12	-0.507946	93	169	2.60462e-07	Down-regulated
RESF1	Pig	7.1631e-12	-0.623482	108	187	2.61776e-07	Down-regulated
ENSSSCG00000024162	Pig	8.30411e-12	-2.10252	8	0.04	3.03474e-07	Down-regulated
EZH2	Pig	9.45321e-12	-1.19584	28	74	3.45468e-07	Down-regulated
CTSA	Pig	9.89497e-12	-0.772087	54	114	3.61612e-07	Down-regulated
DPP9	Pig	9.91682e-12	-0.892963	37	89	3.6241e-07	Down-regulated
CRTC1	Pig	1.03358e-11	-0.713059	55	115	3.77722e-07	Down-regulated
EDEM1	Pig	1.07921e-11	-1.15354	42	95	3.94396e-07	Down-regulated
SLC22A17	Pig	1.2005e-11	-7.14289	0	19	4.38722e-07	Down-regulated
MRC1	Pig	1.2005e-11	-6.62739	0	19	4.38722e-07	Down-regulated
LYVE1	Pig	1.21139e-11	-2.8311	3	27	4.42703e-07	Down-regulated
ENPP6	Pig	1.21573e-11	-1.03305	25	69	4.44287e-07	Down-regulated
GALK2	Pig	1.2295e-11	-0.527896	173	268	4.49322e-07	Down-regulated
NASP	Pig	1.45971e-11	-0.740558	46	103	5.33451e-07	Down-regulated
CTNND2	Pig	1.59274e-11	-1.77455	25	69	5.82066e-07	Down-regulated
QRFPR	Pig	1.7259e-11	-2.46702	4	29	6.30729e-07	Down-regulated
UBTD1	Pig	1.75102e-11	-0.933599	31	78	6.39911e-07	Down-regulated
FAM117A	Pig	1.80063e-11	-0.991856	34	84	6.5804e-07	Down-regulated
ENPP4	Pig	1.85483e-11	-0.904057	34	83	6.77848e-07	Down-regulated
ENSSSCG00000041954	Pig	1.91598e-11	-1.36884	23	65	7.00196e-07	Down-regulated
SESN2	Pig	1.99243e-11	-0.556588	93	165	7.28133e-07	Down-regulated
CASKIN2	Pig	2.21844e-11	-1.2849	12	46	8.10729e-07	Down-regulated
ENSSSCG00000030351	Pig	2.57927e-11	-0.761533	24	67	9.42595e-07	Down-regulated
ALPK1	Pig	2.67394e-11	-2.64735	7	37	9.77191e-07	Down-regulated
ECHDC1	Pig	2.74043e-11	-0.541217	127	212	1.00149e-06	Down-regulated
ENSSSCG00000017103	Pig	2.87021e-11	-1.00335	44	98	1.04892e-06	Down-regulated
ITGAL	Pig	2.98413e-11	-0.915517	17	56	1.09055e-06	Down-regulated
OSBPL6	Pig	3.24184e-11	-1.29133	33	0.08	1.18473e-06	Down-regulated
PRDM5	Pig	3.24888e-11	-0.698017	93	166	1.1873e-06	Down-regulated
SLC6A6	Pig	3.5158e-11	-0.784281	64	125	1.28485e-06	Down-regulated
ENSSSCG00000040100	Pig	3.55239e-11	-0.773797	44	98	1.29822e-06	Down-regulated
PCYT2	Pig	3.69791e-11	-1.00096	34	82	1.3514e-06	Down-regulated
ENSSSCG00000013568	Pig	3.97519e-11	-0.734867	0.04	91	1.45273e-06	Down-regulated
GABRA2	Pig	4.08791e-11	-1.35245	33	0.08	1.49393e-06	Down-regulated
GART	Pig	4.32601e-11	-0.591484	0.11	189	1.58094e-06	Down-regulated
LMO1	Pig	4.60902e-11	-0.534885	87	157	1.68437e-06	Down-regulated
PAPSS1	Pig	5.03441e-11	-0.986002	56	113	1.83983e-06	Down-regulated
PCSK2	Human	5.0832e-11	-1.48413	11	44	1.85766e-06	Down-regulated
IGSF9B	Pig	5.15704e-11	-0.861366	47	101	1.88464e-06	Down-regulated
NT5DC2	Pig	5.23829e-11	-1.83283	13	47	1.91433e-06	Down-regulated
ENSSSCG00000013260	Pig	5.26497e-11	-5.97812	0	18	1.92408e-06	Down-regulated
LIMA1	Pig	5.33079e-11	-2.75955	5	31	1.94814e-06	Down-regulated
H2AC6	Pig	5.3521e-11	-0.974229	172	251	1.95593e-06	Down-regulated
FANCL	Pig	5.3525e-11	-0.772583	41	92	1.95607e-06	Down-regulated
CYB5R4	Pig	5.39179e-11	-0.636879	109	185	1.97043e-06	Down-regulated
RAC1	Pig	5.61064e-11	-0.811284	76	141	2.05041e-06	Down-regulated
CLIP4	Pig	5.62078e-11	-2.30828	0.01	0.04	2.05412e-06	Down-regulated
FGF2	Pig	5.6208e-11	-1.08243	68	128	2.05412e-06	Down-regulated
ENSSSCG00000010719	Pig	5.65791e-11	-0.68819	27	71	2.06768e-06	Down-regulated
BIN3	Pig	5.90969e-11	-0.559872	72	137	2.1597e-06	Down-regulated
CARMIL3	Pig	6.00898e-11	-0.701774	15	0.05	2.19598e-06	Down-regulated
ANKRD44	Pig	6.62263e-11	-0.561371	115	192	2.42024e-06	Down-regulated
CUBN	Pig	7.50503e-11	-3.56956	3	27	2.74271e-06	Down-regulated
ZDHHC3	Pig	8.10592e-11	-0.855014	46	0.1	2.96231e-06	Down-regulated
CACNA1H	Pig	8.62478e-11	-2.56567	5	31	3.15193e-06	Down-regulated
TPST2	Pig	9.04874e-11	-0.873366	46	99	3.30686e-06	Down-regulated
KLHL29	Pig	9.87322e-11	-1.45748	18	54	3.60817e-06	Down-regulated
GRM3	Pig	1.02396e-10	-2.22705	11	42	3.74207e-06	Down-regulated
PIPOX	Pig	1.03766e-10	-1.06364	32	77	3.79212e-06	Down-regulated
CCN2	Pig	1.07409e-10	-0.60829	158	241	3.92527e-06	Down-regulated
P2RY1	Pig	1.10283e-10	-6.20288	0	17	4.0303e-06	Down-regulated
SCD	Pig	1.10283e-10	-6.68612	0	17	4.0303e-06	Down-regulated
KIT	Pig	1.10283e-10	-7.00358	0	17	4.0303e-06	Down-regulated
ABCA6	Pig	1.10283e-10	-6.10488	0	17	4.0303e-06	Down-regulated
HAT1	Pig	1.1202e-10	-1.06331	28	71	4.09379e-06	Down-regulated
CLCN1	Pig	1.1391e-10	-0.742709	33	79	4.16285e-06	Down-regulated
ZNF484	Pig	1.16667e-10	-1.34406	25	66	4.26359e-06	Down-regulated
SFXN1	Pig	1.17874e-10	-0.961638	37	85	4.30772e-06	Down-regulated
PPARG	Pig	1.19795e-10	-1.08766	38	86	4.37792e-06	Down-regulated
CBX5	Pig	1.23619e-10	-0.536519	59	118	4.51766e-06	Down-regulated
SH3GL1	Pig	1.29772e-10	-0.91146	32	77	4.7425e-06	Down-regulated
ESRRA	Pig	1.29971e-10	-0.843469	19	57	4.74979e-06	Down-regulated
CYP39A1	Pig	1.30046e-10	-0.840772	27	69	4.75255e-06	Down-regulated
UTP4	Pig	1.34289e-10	-0.686438	41	92	4.9076e-06	Down-regulated
ENSSSCG00000032809	Pig	1.34437e-10	-3.37999	2	23	4.913e-06	Down-regulated
CDKL5	Pig	1.3594e-10	-0.646125	85	151	4.96791e-06	Down-regulated
BID	Pig	1.40553e-10	-1.05792	41	91	5.13653e-06	Down-regulated
RYR2	Human	1.42033e-10	-0.924248	17	53	5.19059e-06	Down-regulated
ENSSSCG00000020837	Pig	1.49396e-10	-1.73134	13	46	5.45967e-06	Down-regulated
SLC40A1	Pig	1.49594e-10	-0.872146	63	122	5.46693e-06	Down-regulated
STARD4	Pig	1.52261e-10	-0.639398	54	111	5.56437e-06	Down-regulated
TMEM181	Pig	1.54739e-10	-0.714176	62	0.12	5.65494e-06	Down-regulated
ODF2	Pig	1.56914e-10	-0.51816	99	171	5.73442e-06	Down-regulated
PSME3IP1	Pig	1.59567e-10	-0.628573	74	138	5.83137e-06	Down-regulated
MAN2A2	Pig	1.65775e-10	-0.525786	49	103	6.05824e-06	Down-regulated
ITGA6	Pig	1.76605e-10	-0.664922	34	82	6.45405e-06	Down-regulated
PDCD4	Pig	2.02917e-10	-0.717833	191	281	7.4156e-06	Down-regulated
INTU	Pig	2.05429e-10	-0.515082	48	101	7.50739e-06	Down-regulated
CAMK1D	Pig	2.05924e-10	-1.1868	17	53	7.5255e-06	Down-regulated
GMDS	Pig	2.17397e-10	-0.617659	114	189	7.94477e-06	Down-regulated
PRMT8	Pig	2.25948e-10	-0.615587	45	97	8.25728e-06	Down-regulated
NFIL3	Pig	2.40165e-10	-0.713076	71	134	8.77682e-06	Down-regulated
SMTN	Pig	2.48313e-10	-0.572585	49	102	9.0746e-06	Down-regulated
RASA3	Pig	2.72947e-10	-0.946419	0.06	116	9.97484e-06	Down-regulated
CAV1	Pig	2.81071e-10	-0.84794	49	102	1.02717e-05	Down-regulated
ENSSSCG00000046452	Pig	2.83828e-10	-0.526453	98	0.17	1.03725e-05	Down-regulated
APH1B	Pig	2.84088e-10	-1.5559	17	52	1.0382e-05	Down-regulated
ASAP2	Pig	3.08071e-10	-4.75173	1	19	1.12585e-05	Down-regulated
SERPING1	Pig	3.13193e-10	-4.50132	1	19	1.14456e-05	Down-regulated
MYO1D	Pig	3.48925e-10	-3.32579	4	27	1.27515e-05	Down-regulated
HELLS	Pig	3.7155e-10	-2.18548	7	34	1.35783e-05	Down-regulated
ENSSSCG00000013530	Pig	3.86228e-10	-1.70423	11	41	1.41147e-05	Down-regulated
ENSSSCG00000032552	Pig	4.20131e-10	-0.702786	34	0.08	1.53537e-05	Down-regulated
SLC6A17	Pig	4.36785e-10	-1.51985	9	37	1.59623e-05	Down-regulated
RNFT1	Pig	4.37118e-10	-0.518749	104	176	1.59745e-05	Down-regulated
RAD18	Pig	4.41074e-10	-0.646763	57	113	1.6119e-05	Down-regulated
PTPRF	Pig	5.09703e-10	-2.82691	4	26	1.86271e-05	Down-regulated
NUDCD3	Pig	5.28954e-10	-0.549806	73	134	1.93306e-05	Down-regulated
PEX2	Pig	5.2963e-10	-0.714332	43	92	1.93553e-05	Down-regulated
ENSSSCG00000029709	Pig	5.5475e-10	-1.86552	16	49	2.02733e-05	Down-regulated
ENSSSCG00000031893	Pig	5.89912e-10	-0.983169	27	67	2.15583e-05	Down-regulated
MYH3	Pig	6.77673e-10	-2.93756	1	18	2.47656e-05	Down-regulated
SLC37A3	Pig	6.8079e-10	-0.604991	81	145	2.48795e-05	Down-regulated
HBA1	Human	6.90297e-10	-2.28466	1	0.02	2.52269e-05	Down-regulated
NUPR1	Pig	6.93198e-10	-2.52752	1	0.02	2.53329e-05	Down-regulated
RNFT2	Pig	7.40991e-10	-0.78453	35	0.08	2.70795e-05	Down-regulated
MGAT4D	Pig	8.14853e-10	-0.631291	24	63	2.97788e-05	Down-regulated
BCO1	Pig	8.32205e-10	-1.74437	5	28	3.04129e-05	Down-regulated
CCN1	Human	8.56147e-10	-2.30884	5	28	3.12879e-05	Down-regulated
XYLT2	Pig	8.58963e-10	-0.85302	24	62	3.13908e-05	Down-regulated
JAG1	Pig	8.99145e-10	-1.03962	29	71	3.28592e-05	Down-regulated
DUSP4	Pig	1.02686e-09	-0.538292	46	95	3.75266e-05	Down-regulated
STAT6	Pig	1.11115e-09	-1.64721	14	45	4.06072e-05	Down-regulated
RETSAT	Pig	1.20088e-09	-0.867853	22	0.06	4.38861e-05	Down-regulated
MOK	Pig	1.22616e-09	-1.42601	16	48	4.48101e-05	Down-regulated
PLCB1	Pig	1.25651e-09	-5.04173	0	17	4.59193e-05	Down-regulated
ENSSSCG00000024161	Pig	1.25796e-09	-4.85393	0	17	4.59721e-05	Down-regulated
NPHP1	Pig	1.25874e-09	-0.500348	75	136	4.60005e-05	Down-regulated
ENSSSCG00000013380	Pig	1.30147e-09	-1.11594	31	72	4.75622e-05	Down-regulated
ENSSSCG00000029553	Pig	1.4352e-09	-0.595193	39	85	5.24494e-05	Down-regulated
TRABD2B	Pig	1.51304e-09	-2.52929	6	0.03	5.52942e-05	Down-regulated
EPB41L4A	Pig	1.52861e-09	-3.80367	3	23	5.5863e-05	Down-regulated
NPAT	Pig	1.54819e-09	-0.516665	96	163	5.65786e-05	Down-regulated
KCNN3	Pig	1.55172e-09	-2.53842	8	34	5.67076e-05	Down-regulated
ARRB1	Pig	1.55757e-09	-1.20557	22	59	5.69216e-05	Down-regulated
UAP1	Pig	1.61633e-09	-0.742962	78	139	5.90687e-05	Down-regulated
STK35	Pig	1.63129e-09	-0.610115	71	0.13	5.96154e-05	Down-regulated
EDEM2	Pig	1.71002e-09	-0.647085	83	145	6.24927e-05	Down-regulated
SEPTIN10	Pig	1.74627e-09	-0.686749	58	112	6.38176e-05	Down-regulated
HNF1B	Pig	1.77308e-09	-0.594076	21	57	6.47973e-05	Down-regulated
ENSSSCG00000050966	Pig	1.84199e-09	-0.526583	62	118	6.73155e-05	Down-regulated
ENSSSCG00000017177	Pig	1.8429e-09	-0.971663	23	0.06	6.73487e-05	Down-regulated
ST3GAL5	Pig	1.89931e-09	-2.95925	4	25	6.94104e-05	Down-regulated
FAM114A1	Pig	1.96303e-09	-0.629125	0.01	37	7.1739e-05	Down-regulated
DDR2	Pig	2.12804e-09	-6.71382	0	15	7.77692e-05	Down-regulated
SLC2A12	Pig	2.39529e-09	-0.705812	32	74	8.7536e-05	Down-regulated
TNS2	Pig	2.48388e-09	-3.03556	3	24	9.07734e-05	Down-regulated
FAM151A	Pig	2.607e-09	-5.04473	0	16	9.52727e-05	Down-regulated
NTRK3	Pig	2.62772e-09	-2.2387	3	24	9.60302e-05	Down-regulated
TMEM145	Pig	2.64944e-09	-1.35433	11	0.04	9.68238e-05	Down-regulated
XPOT	Pig	2.66963e-09	-0.83266	26	64	9.75616e-05	Down-regulated
RPA1	Pig	2.75684e-09	-0.922559	39	83	0.000100749	Down-regulated
PDE4A	Pig	3.10392e-09	-0.589947	41	87	0.000113433	Down-regulated
YIPF2	Pig	3.14956e-09	-0.528314	81	142	0.000115101	Down-regulated
IVD	Pig	3.289e-09	-0.527539	63	119	0.000120196	Down-regulated
FAM3B	Pig	3.38052e-09	-2.48843	3	22	0.000123541	Down-regulated
RRBP1	Pig	3.46726e-09	-1.33134	14	44	0.000126711	Down-regulated
IKZF4	Pig	3.52088e-09	-0.931393	29	68	0.00012867	Down-regulated
FBXO34	Pig	3.58844e-09	-0.547748	105	173	0.00013114	Down-regulated
HGF	Pig	3.70458e-09	-1.13334	17	48	0.000135384	Down-regulated
CD81	Pig	3.75396e-09	-0.524581	187	0.27	0.000137189	Down-regulated
PLOD1	Pig	3.91996e-09	-0.573382	69	125	0.000143255	Down-regulated
CFAP251	Pig	3.93363e-09	-2.22203	6	0.03	0.000143755	Down-regulated
RGS20	Pig	3.95617e-09	-1.13955	8	34	0.000144578	Down-regulated
IDH1	Pig	4.6242e-09	-0.871431	26	64	0.000168991	Down-regulated
SKAP2	Pig	4.64144e-09	-1.53906	15	46	0.000169621	Down-regulated
SKA2	Pig	4.68254e-09	-0.552462	71	129	0.000171123	Down-regulated
MCFD2	Pig	4.68329e-09	-0.988143	43	88	0.000171151	Down-regulated
ENSSSCG00000045769	Pig	5.03222e-09	-0.557011	231	312	0.000183902	Down-regulated
OTULINL	Pig	5.03709e-09	-2.78603	3	23	0.000184081	Down-regulated
NHEJ1	Pig	5.07391e-09	-0.545107	55	105	0.000185426	Down-regulated
CSMD1	Pig	5.11221e-09	-0.923899	28	66	0.000186826	Down-regulated
HM13	Pig	5.12857e-09	-0.684536	0.07	126	0.000187424	Down-regulated
GCAT	Pig	5.49044e-09	-0.785106	26	63	0.000200648	Down-regulated
ENSSSCG00000049987	Pig	5.98603e-09	-0.874796	18	0.05	0.000218759	Down-regulated
CENPI	Pig	6.25931e-09	-0.891828	32	73	0.000228746	Down-regulated
FRAS1	Pig	6.55724e-09	-0.621885	31	71	0.000239635	Down-regulated
MLXIP	Pig	6.81552e-09	-0.767105	48	95	0.000249073	Down-regulated
NMUR2	Pig	6.82095e-09	-1.73372	7	31	0.000249272	Down-regulated
HK3	Pig	7.02996e-09	-0.513883	45	91	0.00025691	Down-regulated
ALDH4A1	Pig	7.70568e-09	-2.4801	6	29	0.000281604	Down-regulated
ENSSSCG00000010860	Pig	7.80987e-09	-0.504259	75	132	0.000285412	Down-regulated
NEU3	Pig	8.11203e-09	-0.643143	53	102	0.000296454	Down-regulated
ENSSSCG00000007642	Pig	8.18149e-09	-0.60867	46	92	0.000298993	Down-regulated
EFEMP1	Pig	8.71359e-09	-1.35941	37	79	0.000318438	Down-regulated
ENSSSCG00000021591	Pig	8.79277e-09	-0.63814	55	105	0.000321332	Down-regulated
CSNK1G2	Pig	8.85956e-09	-0.946992	29	67	0.000323773	Down-regulated
THAP9	Pig	8.87423e-09	-0.799682	48	95	0.000324309	Down-regulated
EMILIN1	Pig	9.36712e-09	-5.80339	0	14	0.000342321	Down-regulated
RAB3B	Pig	9.36759e-09	-0.507022	166	0.24	0.000342339	Down-regulated
PDCD11	Pig	9.88101e-09	-0.731891	45	0.09	0.000361102	Down-regulated
ENSSSCG00000041595	Pig	9.97369e-09	-1.25099	22	57	0.000364488	Down-regulated
ADI1	Pig	1.02597e-08	-1.41437	14	43	0.00037494	Down-regulated
PLPP5	Pig	1.03215e-08	-2.24696	0.01	35	0.000377201	Down-regulated
SPI1	Pig	1.04989e-08	-0.587832	199	281	0.000383682	Down-regulated
ENSSSCG00000026449	Pig	1.0505e-08	-0.545214	0.08	138	0.000383907	Down-regulated
AIDA	Pig	1.07344e-08	-0.525782	55	105	0.000392287	Down-regulated
MSH2	Pig	1.12153e-08	-0.814675	22	56	0.000409864	Down-regulated
FMNL3	Pig	1.12413e-08	-0.639855	63	116	0.000410812	Down-regulated
SORL1	Pig	1.13302e-08	-1.21897	19	52	0.000414063	Down-regulated
RALB	Pig	1.19734e-08	-0.997262	27	64	0.000437567	Down-regulated
MTAP	Pig	1.25535e-08	-0.816787	37	79	0.000458768	Down-regulated
PTTG1IP	Pig	1.32677e-08	-0.891652	31	69	0.000484868	Down-regulated
ENSSSCG00000033816	Pig	1.34334e-08	-0.681273	38	0.08	0.000490923	Down-regulated
MMS22L	Pig	1.43503e-08	-0.772765	31	69	0.000524432	Down-regulated
FUT11	Pig	1.48655e-08	-0.648823	64	116	0.000543258	Down-regulated
KAZN	Pig	1.76033e-08	-0.760999	53	0.1	0.000643314	Down-regulated
MED16	Pig	1.82807e-08	-0.766395	39	81	0.000668067	Down-regulated
MLKL	Pig	2.08378e-08	-2.55884	4	24	0.000761518	Down-regulated
TMEM242	Pig	2.11327e-08	-0.559978	56	105	0.000772294	Down-regulated
NEIL2	Pig	2.14445e-08	-2.05898	15	44	0.000783689	Down-regulated
ENSSSCG00000027349	Pig	2.15159e-08	-0.728694	49	95	0.000786298	Down-regulated
TTC4	Pig	2.28444e-08	-0.518813	0.08	137	0.00083485	Down-regulated
C1orf105	Pig	2.28984e-08	-1.11156	12	0.04	0.000836822	Down-regulated
BCAT1	Pig	2.30545e-08	-2.07554	2	18	0.000842527	Down-regulated
IRF3	Pig	2.3614e-08	-0.699582	54	101	0.000862975	Down-regulated
PCNA	Pig	2.39442e-08	-0.809724	49	93	0.000875042	Down-regulated
MTHFSD	Pig	2.43117e-08	-0.749882	44	88	0.00088847	Down-regulated
CFAP100	Pig	2.4985e-08	-3.85098	1	17	0.000913075	Down-regulated
ENSSSCG00000026564	Pig	2.77408e-08	-0.646676	32	71	0.00101379	Down-regulated
LGMN	Pig	2.82305e-08	-0.754542	58	106	0.00103168	Down-regulated
HSD17B11	Pig	2.88425e-08	-0.707274	61	111	0.00105405	Down-regulated
PUS7L	Pig	2.89821e-08	-1.28934	19	51	0.00105915	Down-regulated
VAV3	Pig	3.13116e-08	-3.40809	2	0.02	0.00114428	Down-regulated
NOA1	Pig	3.18245e-08	-0.640371	116	181	0.00116303	Down-regulated
TMEM241	Pig	3.19653e-08	-0.62257	27	63	0.00116817	Down-regulated
RAP2A	Pig	3.24931e-08	-1.70672	12	39	0.00118746	Down-regulated
BRD9	Pig	3.37641e-08	-0.546755	78	134	0.00123391	Down-regulated
MAN1C1	Pig	3.56374e-08	-1.1383	28	63	0.00130237	Down-regulated
FLRT1	Pig	3.64384e-08	-1.57182	11	36	0.00133164	Down-regulated
KATNAL2	Pig	3.72314e-08	-1.10485	15	43	0.00136062	Down-regulated
CSGALNACT2	Pig	3.76798e-08	-0.545182	105	167	0.00137701	Down-regulated
RINL	Pig	4.09928e-08	-1.55829	6	27	0.00149808	Down-regulated
ABCC5	Pig	4.10466e-08	-0.817093	18	48	0.00150005	Down-regulated
IFFO2	Pig	4.14883e-08	-1.12796	13	0.04	0.00151619	Down-regulated
HESX1	Pig	4.24088e-08	-0.614472	55	102	0.00154983	Down-regulated
DHRS7C	Pig	4.40315e-08	-2.56591	4	23	0.00160913	Down-regulated
TPH2	Pig	4.48819e-08	-1.4342	12	37	0.00164021	Down-regulated
CCDC85C	Pig	4.4908e-08	-0.663823	26	0.06	0.00164116	Down-regulated
SMG9	Pig	4.61453e-08	-0.512228	56	104	0.00168638	Down-regulated
TUBGCP2	Pig	4.86637e-08	-0.512696	53	99	0.00177842	Down-regulated
EIF4EBP1	Pig	5.00706e-08	-0.659499	0.07	122	0.00182983	Down-regulated
C1RL	Pig	5.3306e-08	-3.86242	1	15	0.00194807	Down-regulated
KCNC3	Pig	5.39812e-08	-1.56294	7	0.03	0.00197274	Down-regulated
AGAP3	Pig	5.4868e-08	-0.578517	71	122	0.00200515	Down-regulated
DRAM1	Pig	5.53174e-08	-1.58574	7	0.03	0.00202158	Down-regulated
ADCK2	Pig	5.58729e-08	-0.639291	34	73	0.00204187	Down-regulated
ZDBF2	Pig	5.674e-08	-0.646411	74	127	0.00207356	Down-regulated
ARHGEF39	Pig	5.72449e-08	-2.31959	4	22	0.00209202	Down-regulated
FNDC1	Pig	5.78738e-08	-2.08207	5	24	0.002115	Down-regulated
ENSSSCG00000006156	Pig	6.16488e-08	-0.539914	0.08	134	0.00225295	Down-regulated
PPIL2	Pig	6.3405e-08	-0.706688	63	113	0.00231714	Down-regulated
TIRAP	Pig	6.59841e-08	-0.578872	44	87	0.00241139	Down-regulated
IRAK3	Pig	6.64088e-08	-0.701947	0.08	134	0.00242691	Down-regulated
MTMR8	Pig	6.71663e-08	-0.650943	48	92	0.00245459	Down-regulated
KRR1	Pig	7.04785e-08	-1.21817	23	55	0.00257564	Down-regulated
KCTD16	Pig	7.30514e-08	-1.41218	32	67	0.00266966	Down-regulated
ENSSSCG00000040586	Pig	7.45501e-08	-1.93564	7	28	0.00272443	Down-regulated
F5	Pig	7.64244e-08	-1.82484	5	24	0.00279293	Down-regulated
BRF1	Pig	7.97666e-08	-0.618081	49	93	0.00291507	Down-regulated
CDHR2	Pig	8.09643e-08	-1.90788	5	24	0.00295884	Down-regulated
EIPR1	Pig	8.91731e-08	-0.702307	41	82	0.00325883	Down-regulated
RAI14	Pig	9.20523e-08	-2.06968	5	25	0.00336405	Down-regulated
LITAF	Pig	9.6724e-08	-0.505391	28	62	0.00353478	Down-regulated
RAD52	Pig	9.77161e-08	-0.567227	0.13	195	0.00357104	Down-regulated
LDLRAD4	Pig	1.0002e-07	-0.611391	35	73	0.00365521	Down-regulated
PIWIL4	Pig	1.03381e-07	-0.506875	57	103	0.00377804	Down-regulated
CHMP4C	Pig	1.04721e-07	-1.91946	3	0.02	0.00382703	Down-regulated
RFTN2	Pig	1.0897e-07	-4.58755	1	14	0.00398232	Down-regulated
LDLRAP1	Pig	1.0916e-07	-1.17854	17	46	0.00398924	Down-regulated
NCS1	Pig	1.10735e-07	-1.29632	19	48	0.00404682	Down-regulated
MYL1	Pig	1.12281e-07	-3.54813	1	14	0.0041033	Down-regulated
MTHFD1L	Pig	1.12353e-07	-1.14379	33	69	0.00410596	Down-regulated
SUPT6H	Pig	1.21292e-07	-0.574981	0.07	0.12	0.00443262	Down-regulated
ELMOD2	Pig	1.2966e-07	-0.505669	47	89	0.00473841	Down-regulated
ENSSSCG00000045412	Pig	1.35122e-07	-0.599607	35	72	0.00493804	Down-regulated
PECAM1	Pig	1.44039e-07	-0.924754	0.02	0.05	0.00526392	Down-regulated
IQGAP2	Pig	1.4707e-07	-2.94307	4	22	0.00537469	Down-regulated
ENSSSCG00000029600	Pig	1.50153e-07	-0.528876	64	112	0.00548736	Down-regulated
TP53INP2	Pig	1.50729e-07	-0.580228	32	69	0.0055084	Down-regulated
HGS	Pig	1.51955e-07	-0.529878	57	102	0.00555318	Down-regulated
ENSSSCG00000031299	Pig	1.64435e-07	-0.874783	46	88	0.00600929	Down-regulated
NINJ1	Pig	1.65349e-07	-0.722215	34	0.07	0.00604269	Down-regulated
NDUFA10	Pig	1.69023e-07	-0.676148	51	94	0.00617695	Down-regulated
USP35	Pig	1.69642e-07	-1.04835	18	46	0.00619957	Down-regulated
VASP	Pig	1.75e-07	-0.743004	26	59	0.00639538	Down-regulated
ENSSSCG00000015084	Pig	1.82708e-07	-5.67121	0	11	0.00667705	Down-regulated
ETV4	Pig	1.82708e-07	-5.77288	0	11	0.00667705	Down-regulated
PACS2	Pig	1.85381e-07	-0.604526	68	118	0.00677475	Down-regulated
PPAT	Pig	1.88518e-07	-1.22954	13	38	0.0068894	Down-regulated
PGM2	Pig	1.91277e-07	-0.712761	29	64	0.00699021	Down-regulated
NOVA1	Human	1.9399e-07	-2.40043	7	27	0.00708938	Down-regulated
ZSWIM5	Pig	1.99477e-07	-1.30055	25	57	0.0072899	Down-regulated
SPAG1	Pig	2.02819e-07	-0.503909	56	102	0.00741203	Down-regulated
CRELD1	Pig	2.03687e-07	-0.882122	22	53	0.00744374	Down-regulated
NEK3	Pig	2.0547e-07	-0.609884	0.05	93	0.0075089	Down-regulated
FAM53A	Pig	2.09749e-07	-1.30636	11	35	0.00766529	Down-regulated
DNAJB12	Pig	2.1363e-07	-0.616698	0.04	79	0.0078071	Down-regulated
ASAP3	Pig	2.27453e-07	-1.44579	12	35	0.00831228	Down-regulated
MAGED1	Pig	2.28713e-07	-0.998938	36	73	0.00835832	Down-regulated
ENSSSCG00000016868	Pig	2.31202e-07	-4.99011	1	14	0.00844926	Down-regulated
PAWR	Pig	2.33471e-07	-2.18337	6	25	0.0085322	Down-regulated
CA9	Pig	2.40386e-07	-1.08885	22	51	0.00878491	Down-regulated
DNTTIP2	Pig	2.46449e-07	-0.715454	73	122	0.0090065	Down-regulated
LY96	Pig	2.47968e-07	-1.20551	14	0.04	0.00906199	Down-regulated
ENSSSCG00000024552	Pig	2.5766e-07	-1.14972	8	0.03	0.00941619	Down-regulated
RASL10B	Pig	2.58674e-07	-1.2467	6	25	0.00945326	Down-regulated
SPATA17	Pig	2.64206e-07	-0.764121	35	72	0.00965541	Down-regulated
ENSSSCG00000043557	Pig	2.78212e-07	-1.7358	5	23	0.0101673	Down-regulated
NSMF	Pig	2.83567e-07	-0.697894	36	72	0.010363	Down-regulated
IER3	Pig	3.0177e-07	-1.08634	71	118	0.0110282	Down-regulated
SNAP29	Pig	3.58174e-07	-1.65434	12	35	0.0130895	Down-regulated
GNPTAB	Pig	3.65915e-07	-0.617653	51	92	0.0133724	Down-regulated
ENTPD7	Pig	3.7749e-07	-1.12048	32	66	0.0137954	Down-regulated
PPP2R2C	Pig	3.84159e-07	-0.831639	22	52	0.0140391	Down-regulated
ABCG1	Pig	4.0547e-07	-2.11777	2	15	0.0148179	Down-regulated
STK4	Pig	4.22655e-07	-0.544858	63	109	0.0154459	Down-regulated
ANO8	Pig	4.33286e-07	-1.5493	12	35	0.0158344	Down-regulated
GNS	Pig	4.35005e-07	-0.50239	0.07	118	0.0158973	Down-regulated
THSD7B	Pig	4.65104e-07	-1.17047	18	45	0.0169972	Down-regulated
CARM1	Pig	4.70936e-07	-0.640132	49	0.09	0.0172104	Down-regulated
C12orf45	Pig	4.73312e-07	-0.700587	58	102	0.0172972	Down-regulated
DNAI4	Pig	4.83919e-07	-0.984283	15	0.04	0.0176848	Down-regulated
DHX33	Pig	5.23145e-07	-0.710824	24	55	0.0191183	Down-regulated
MACROH2A2	Pig	5.41488e-07	-0.913637	29	62	0.0197887	Down-regulated
GPR180	Pig	5.48346e-07	-0.803513	27	58	0.0200393	Down-regulated
ACOT12	Pig	5.61157e-07	-0.714764	39	76	0.0205075	Down-regulated
PHF19	Pig	5.70045e-07	-0.5644	12	36	0.0208323	Down-regulated
GOLGA7B	Pig	5.77e-07	-1.23607	7	27	0.0210865	Down-regulated
LIN7A	Pig	5.97148e-07	-1.35035	18	44	0.0218228	Down-regulated
UGGT2	Pig	6.0737e-07	-1.16891	0.03	63	0.0221963	Down-regulated
MCUB	Pig	6.16825e-07	-1.27654	15	39	0.0225419	Down-regulated
TM7SF3	Pig	6.18755e-07	-0.622626	44	83	0.0226124	Down-regulated
ANGPTL2	Pig	6.20998e-07	-2.44558	7	25	0.0226944	Down-regulated
MATN2	Pig	6.58535e-07	-1.861	5	23	0.0240662	Down-regulated
PODXL2	Pig	6.62021e-07	-0.528096	22	51	0.0241935	Down-regulated
FAM171B	Pig	6.89435e-07	-0.69475	54	96	0.0251954	Down-regulated
ENSSSCG00000040779	Pig	7.24977e-07	-1.01753	19	46	0.0264943	Down-regulated
FASTK	Pig	7.2905e-07	-0.511682	31	64	0.0266431	Down-regulated
DIPK2A	Pig	7.49292e-07	-0.870384	36	0.07	0.0273829	Down-regulated
AMIGO1	Pig	7.73533e-07	-1.41664	8	28	0.0282688	Down-regulated
ZNF618	Pig	7.74811e-07	-2.08642	6	24	0.0283155	Down-regulated
PXDN	Pig	7.8223e-07	-0.664635	46	85	0.0285866	Down-regulated
PHETA2	Pig	7.90324e-07	-2.06508	7	26	0.0288824	Down-regulated
ENSSSCG00000004081	Pig	7.96097e-07	-2.93416	2	15	0.0290934	Down-regulated
GNA14	Pig	8.03892e-07	-2.44178	7	26	0.0293782	Down-regulated
PLIN5	Pig	8.10838e-07	-5.71655	0	0.01	0.0296321	Down-regulated
FCGRT	Pig	8.1184e-07	-0.842872	32	64	0.0296687	Down-regulated
ACOX3	Pig	8.34325e-07	-0.610481	0.04	76	0.0304904	Down-regulated
ADD2	Pig	8.34629e-07	-1.5179	6	24	0.0305015	Down-regulated
ENSSSCG00000044995	Pig	8.53728e-07	-0.771008	7	26	0.0311995	Down-regulated
PAQR3	Pig	8.97714e-07	-0.582602	43	0.08	0.0328069	Down-regulated
ENSSSCG00000008335	Pig	8.97939e-07	-0.554902	73	119	0.0328152	Down-regulated
ITPRID1	Pig	9.00811e-07	-0.942595	27	59	0.0329201	Down-regulated
RNF20	Pig	9.05937e-07	-0.861484	0.03	62	0.0331075	Down-regulated
TMIE	Pig	9.29982e-07	-3.01254	1	14	0.0339862	Down-regulated
ENSSSCG00000032319	Pig	9.44889e-07	-1.2351	11	33	0.034531	Down-regulated
ANAPC5	Pig	9.87888e-07	-0.620264	52	92	0.0361024	Down-regulated
ADAM23	Pig	9.90504e-07	-0.747169	44	81	0.036198	Down-regulated
ENSSSCG00000031075	Pig	9.9816e-07	-2.76342	2	17	0.0364777	Down-regulated
GUCY1A1	Pig	1.06166e-06	-1.03988	0.03	62	0.0387984	Down-regulated
BCL9L	Pig	1.06615e-06	-1.40267	12	34	0.0389626	Down-regulated
GCDH	Pig	1.0843e-06	-0.636562	22	51	0.0396257	Down-regulated
GCM2	Pig	1.09225e-06	-1.72557	3	18	0.0399162	Down-regulated
ALDH6A1	Pig	1.12717e-06	-0.780133	31	63	0.0411923	Down-regulated
SASS6	Pig	1.15549e-06	-0.887932	0.03	62	0.0422274	Down-regulated
WDR93	Pig	1.16395e-06	-1.26179	12	34	0.0425365	Down-regulated
SS18L1	Pig	1.21196e-06	-0.719124	23	52	0.0442911	Down-regulated
BAALC	Pig	1.28065e-06	-3.34821	2	15	0.0468012	Down-regulated
NELFA	Pig	1.33248e-06	-0.732339	27	58	0.0486955	Down-regulated

## Sheet: Vasc_EC
gene	Species	p_val	avg_log2FC	pct. 1	pct.2	p_val_adj	level
CXCL10	Pig	1.71551e-139	7.32243	614	13	6.26932e-135	Up-regulated
ISG15	Pig	2.32264e-127	4.25969	811	0.12	8.48807e-123	Up-regulated
RSAD2	Pig	3.62912e-126	3.69365	831	131	1.32626e-121	Up-regulated
ISG12(A)	Pig	9.35753e-121	3.80254	783	0.11	3.41971e-116	Up-regulated
MX1	Pig	7.35939e-118	3.44299	732	83	2.68949e-113	Up-regulated
ENSSSCG00000034570	Pig	1.94007e-112	3.37403	921	267	7.09e-108	Up-regulated
MX2	Pig	1.85819e-110	3.3626	846	207	6.79076e-106	Up-regulated
DDX60	Pig	3.84975e-103	4.37489	559	35	1.40689e-98	Up-regulated
RGMB	Pig	1.72311e-101	3.18895	843	0.23	6.29711e-97	Up-regulated
HERC5	Pig	1.65767e-100	3.28284	728	118	6.05797e-96	Up-regulated
ENSSSCG00000027046	Pig	6.68765e-100	7.30448	433	4	2.444e-95	Up-regulated
OAS2	Pig	1.13085e-95	2.91105	807	198	4.13269e-91	Up-regulated
PLEKHA7	Pig	2.69767e-95	8.7858	406	2	9.85864e-91	Up-regulated
ENSSSCG00000026430	Pig	1.3885e-89	10.5276	374	0	5.07426e-85	Up-regulated
CAMK2D	Pig	7.56728e-88	2.57622	0.89	418	2.76546e-83	Up-regulated
RUNX2	Pig	1.06105e-87	4.76724	524	47	3.87761e-83	Up-regulated
USP18	Pig	2.8133e-86	2.97492	697	0.13	1.02812e-81	Up-regulated
ZFPM2	Pig	6.19374e-84	7.75571	382	7	2.2635e-79	Up-regulated
ZFY	Pig	1.20949e-83	10.5754	0.35	0	4.42008e-79	Up-regulated
ENSSSCG00000025253	Pig	1.02741e-79	10.3313	335	0	3.75468e-75	Up-regulated
EPSTI1	Pig	6.51083e-78	3.20685	559	0.07	2.37938e-73	Up-regulated
ENSSSCG00000032436	Pig	2.72275e-77	3.10248	709	174	9.9503e-73	Up-regulated
BST2	Pig	4.65585e-73	2.65845	0.72	178	1.70148e-68	Up-regulated
ISG20	Pig	1.78258e-71	5.90466	331	6	6.51443e-67	Up-regulated
ENSSSCG00000014565	Pig	7.86358e-71	2.69873	728	207	2.87374e-66	Up-regulated
ENSSSCG00000009240	Pig	1.50725e-70	4.33032	402	26	5.50825e-66	Up-regulated
ENSSSCG00000017146	Pig	7.04886e-69	2.08854	0.85	315	2.57601e-64	Up-regulated
IFIT1	Pig	2.84925e-68	2.55424	736	219	1.04126e-63	Up-regulated
PARP14	Pig	1.72896e-66	2.2759	689	167	6.31849e-62	Up-regulated
ZNFX1	Pig	2.62136e-66	2.14395	724	192	9.57976e-62	Up-regulated
IFI44L	Pig	1.04889e-65	2.09095	807	294	3.83315e-61	Up-regulated
OASL	Pig	3.38611e-65	10.3132	276	0	1.23745e-60	Up-regulated
UBE2L6	Pig	8.13168e-64	3.19897	469	0.06	2.97172e-59	Up-regulated
DTX3L	Pig	2.51457e-63	2.75381	547	93	9.18949e-59	Up-regulated
GHSR	Pig	4.50692e-63	2.56952	0.72	0.23	1.64705e-58	Up-regulated
ZMAT3	Pig	5.76515e-60	3.72808	406	42	2.10687e-55	Up-regulated
LIFR	Pig	1.12045e-58	1.7054	945	596	4.09467e-54	Up-regulated
TRIM22	Pig	1.25564e-58	2.5904	587	133	4.58872e-54	Up-regulated
ENSSSCG00000040535	Pig	5.63001e-57	5.31336	268	5	2.05749e-52	Up-regulated
CACNB2	Pig	1.05377e-55	9.96345	236	0	3.851e-51	Up-regulated
IFI44	Pig	1.04472e-54	2.08967	669	196	3.81795e-50	Up-regulated
STAT1	Pig	2.10761e-54	1.94988	776	307	7.70224e-50	Up-regulated
IFIH1	Pig	3.18124e-54	1.82426	744	251	1.16259e-49	Up-regulated
ENSSSCG00000038187	Pig	7.35583e-54	3.7209	457	79	2.68819e-49	Up-regulated
EIF2AK2	Pig	5.68018e-53	1.81978	795	334	2.07582e-48	Up-regulated
IFIT5	Pig	9.84413e-53	2.36794	551	125	3.59754e-48	Up-regulated
TXNIP	Pig	4.05841e-51	2.02407	772	331	1.48314e-46	Up-regulated
ENSSSCG00000034976	Pig	1.07026e-50	3.24103	437	73	3.91127e-46	Up-regulated
ENSSSCG00000004830	Pig	1.13148e-50	5.34912	276	14	4.13499e-46	Up-regulated
ETV7	Pig	1.29528e-50	7.28375	0.22	1	4.73361e-46	Up-regulated
PLSCR4	Pig	2.01258e-50	2.43819	614	183	7.35496e-46	Up-regulated
GALNT15	Pig	7.88406e-50	2.39301	512	0.11	2.88123e-45	Up-regulated
ENSSSCG00000014672	Pig	2.79045e-49	3.52468	339	34	1.01977e-44	Up-regulated
SAMD9	Pig	2.06841e-48	2.05542	0.65	205	7.55899e-44	Up-regulated
TMEM156	Pig	3.26117e-48	10.2916	205	0	1.19179e-43	Up-regulated
PARP9	Pig	3.81751e-48	2.97401	362	44	1.39511e-43	Up-regulated
PARP12	Pig	7.63657e-48	1.80365	0.72	264	2.79078e-43	Up-regulated
FGF2	Pig	1.17114e-47	2.50058	559	145	4.27994e-43	Up-regulated
MGMT	Pig	3.23949e-47	1.82509	705	0.24	1.18387e-42	Up-regulated
SLC39A8	Pig	5.20804e-46	3.86515	287	22	1.90328e-41	Up-regulated
PLSCR1	Pig	1.41403e-45	2.14543	606	177	5.16756e-41	Up-regulated
ENSSSCG00000001341	Pig	3.57429e-45	1.53325	815	414	1.30622e-40	Up-regulated
SNX10	Pig	5.52219e-45	2.28806	461	94	2.01809e-40	Up-regulated
GGH	Pig	4.68614e-44	4.06885	268	19	1.71255e-39	Up-regulated
CPM	Pig	1.25102e-43	3.17261	378	62	4.57187e-39	Up-regulated
TRANK1	Pig	1.30502e-43	2.4404	449	91	4.76919e-39	Up-regulated
ENSSSCG00000010893	Pig	1.32942e-43	2.54489	476	109	4.85838e-39	Up-regulated
COL28A1	Pig	2.53048e-43	4.13443	0.28	24	9.24762e-39	Up-regulated
NM-001206399	Pig	2.6489e-43	8.23337	189	1	9.68042e-39	Up-regulated
ENSSSCG00000001229	Pig	4.39987e-43	1.30813	921	766	1.60793e-38	Up-regulated
ENSSSCG00000004387	Pig	1.41699e-42	1.78257	0.74	333	5.17838e-38	Up-regulated
PLPP1	Pig	1.70712e-42	1.72854	886	539	6.23865e-38	Up-regulated
CFAP94	Pig	7.21183e-42	3.79459	256	18	2.63556e-37	Up-regulated
ENSSSCG00000033734	Pig	9.86423e-42	9.28871	177	0	3.60488e-37	Up-regulated
B2M	Pig	1.84079e-41	1.33375	902	584	6.72718e-37	Up-regulated
SLC25A28	Pig	3.79726e-41	2.42782	394	71	1.38771e-36	Up-regulated
TBC1D32	Pig	2.04767e-40	3.28009	327	46	7.48321e-36	Up-regulated
SETX	Pig	3.81818e-40	1.29061	843	438	1.39536e-35	Up-regulated
ENSSSCG00000024973	Pig	5.73004e-40	2.03387	543	156	2.09404e-35	Up-regulated
APOA1	Pig	7.42718e-40	4.49024	217	0.01	2.71426e-35	Up-regulated
AKAP7	Pig	1.44114e-39	2.1903	508	138	5.26665e-35	Up-regulated
PPFIA2	Pig	1.68295e-39	2.79902	394	77	6.15035e-35	Up-regulated
MDM2	Pig	3.23139e-39	2.10144	591	193	1.18091e-34	Up-regulated
LGALS3BP	Pig	4.23477e-39	3.60892	311	42	1.5476e-34	Up-regulated
CMPK2	Pig	5.93283e-39	2.27398	413	86	2.16815e-34	Up-regulated
NBN	Pig	6.95866e-39	1.8657	638	237	2.54304e-34	Up-regulated
FOXS1	Pig	8.32549e-39	2.38882	386	71	3.04255e-34	Up-regulated
ENSSSCG00000016263	Pig	1.08038e-38	1.27989	862	524	3.94825e-34	Up-regulated
ENSSSCG00000037509	Pig	1.16916e-38	7.65445	169	1	4.2727e-34	Up-regulated
ENSSSCG00000017754	Pig	1.32388e-38	1.92331	0.52	145	4.83811e-34	Up-regulated
LGALS8	Pig	4.43078e-38	2.22641	441	106	1.61923e-33	Up-regulated
RESF1	Pig	4.66972e-37	1.72941	783	435	1.70655e-32	Up-regulated
EPS8	Pig	9.42854e-37	1.85668	618	0.23	3.44566e-32	Up-regulated
TEX10	Pig	1.08702e-35	2.59956	429	107	3.97251e-31	Up-regulated
H3-5	Pig	1.31507e-35	1.46614	717	326	4.80593e-31	Up-regulated
LHFPL6	Pig	1.84618e-35	2.08654	0.5	146	6.74687e-31	Up-regulated
TINAGL1	Pig	2.17172e-35	2.25445	441	113	7.93656e-31	Up-regulated
C2CD3	Pig	2.38312e-35	2.28332	429	108	8.70913e-31	Up-regulated
PARD3	Pig	3.2793e-35	1.63262	681	283	1.19842e-30	Up-regulated
DDR2	Pig	4.25051e-35	1.74967	504	148	1.55335e-30	Up-regulated
CLEC2B	Pig	5.41059e-35	1.71026	551	175	1.9773e-30	Up-regulated
ENSSSCG00000014280	Pig	1.23468e-34	1.46656	0.76	381	4.51213e-30	Up-regulated
PML	Pig	1.25051e-34	1.62837	524	159	4.56999e-30	Up-regulated
SGK1	Pig	1.80869e-34	2.0791	421	104	6.60985e-30	Up-regulated
CCND3	Pig	4.04001e-34	1.29165	697	297	1.47642e-29	Up-regulated
IRF7	Pig	4.72785e-34	5.51556	173	6	1.72779e-29	Up-regulated
ENSSSCG00000012178	Pig	5.32157e-34	6.43526	0.15	1	1.94477e-29	Up-regulated
ENSSSCG00000032591	Pig	1.75727e-33	1.83702	551	194	6.42193e-29	Up-regulated
ENPP1	Pig	2.1731e-33	1.77946	709	347	7.9416e-29	Up-regulated
PLAC9	Pig	3.86204e-33	2.98931	287	44	1.41138e-28	Up-regulated
SLC39A14	Pig	4.19655e-33	1.52952	744	363	1.53363e-28	Up-regulated
SHFL	Pig	5.40113e-33	3.84499	197	13	1.97384e-28	Up-regulated
CITED2	Pig	3.11664e-32	4.01387	193	13	1.13898e-27	Up-regulated
CGAS	Pig	4.01681e-32	2.89313	0.28	43	1.46794e-27	Up-regulated
RASSF9	Pig	4.32125e-32	1.97506	0.37	81	1.5792e-27	Up-regulated
KDM5D	Pig	5.28721e-32	6.73886	146	2	1.93221e-27	Up-regulated
GBP2	Pig	5.88024e-32	1.7465	516	168	2.14893e-27	Up-regulated
ENSSSCG00000023158	Pig	8.75051e-32	2.76311	276	41	3.19787e-27	Up-regulated
FAM167B	Pig	1.29401e-31	1.79947	535	188	4.72895e-27	Up-regulated
RASSF8	Pig	1.48181e-31	2.04705	504	166	5.41528e-27	Up-regulated
CLCA1	Pig	1.80217e-31	3.28177	0.24	29	6.58603e-27	Up-regulated
DNAJC13	Pig	2.98517e-31	1.552	717	361	1.09093e-26	Up-regulated
PSMB8	Pig	3.2025e-31	2.28073	0.37	88	1.17035e-26	Up-regulated
CABLES1	Pig	8.80229e-31	3.46897	0.28	47	3.2168e-26	Up-regulated
RPL37A	Pig	9.52871e-31	2.05047	421	111	3.48227e-26	Up-regulated
CHRM2	Pig	1.13822e-30	2.92567	346	0.08	4.15961e-26	Up-regulated
KANK1	Pig	1.88866e-30	4.06355	197	17	6.90213e-26	Up-regulated
ZBP1	Pig	2.78637e-30	1.89556	335	68	1.01828e-25	Up-regulated
ENSSSCG00000038249	Pig	7.16732e-30	8.93379	126	0	2.6193e-25	Up-regulated
ATAD1	Pig	9.7724e-30	1.37577	724	353	3.57132e-25	Up-regulated
COMMD6	Pig	1.09516e-29	1.65609	0.63	277	4.00225e-25	Up-regulated
KCNN3	Pig	1.50656e-29	2.49422	252	36	5.50572e-25	Up-regulated
ADAR	Pig	2.35136e-29	2.01185	0.37	0.09	8.59304e-25	Up-regulated
CCDC194	Pig	4.41213e-29	3.1211	217	25	1.61241e-24	Up-regulated
SNTB2	Pig	4.86583e-29	1.31896	756	372	1.77822e-24	Up-regulated
NMI	Pig	2.69685e-28	1.875	402	0.11	9.85563e-24	Up-regulated
TMEM243	Pig	3.89411e-28	2.17277	0.35	86	1.4231e-23	Up-regulated
HIPK2	Pig	5.89011e-28	1.49027	665	317	2.15254e-23	Up-regulated
ITPKC	Pig	8.91865e-28	2.14096	291	55	3.25932e-23	Up-regulated
CMTR1	Pig	9.36685e-28	1.89285	472	159	3.42312e-23	Up-regulated
HERC6	Pig	1.03405e-27	1.01883	843	549	3.77894e-23	Up-regulated
CNDP2	Pig	1.25885e-27	2.29896	0.26	43	4.60046e-23	Up-regulated
CTSC	Pig	1.49979e-27	2.63836	346	0.09	5.48099e-23	Up-regulated
CCDC191	Pig	1.61921e-27	2.29787	299	0.06	5.91739e-23	Up-regulated
CCSER2	Pig	2.02178e-27	1.22744	728	0.41	7.38858e-23	Up-regulated
THRB	Pig	2.11131e-27	6.36485	126	2	7.71577e-23	Up-regulated
ASNS	Pig	3.42612e-27	2.32532	307	65	1.25207e-22	Up-regulated
CXCL2	Pig	3.97793e-27	1.62022	496	181	1.45373e-22	Up-regulated
KCND3	Pig	4.87673e-27	2.98909	209	25	1.7822e-22	Up-regulated
FBXO39	Pig	4.97459e-27	1.35467	614	269	1.81796e-22	Up-regulated
PTGIS	Pig	5.87318e-27	4.19304	161	11	2.14635e-22	Up-regulated
ENSSSCG00000014997	Pig	6.54731e-27	1.46475	512	183	2.39271e-22	Up-regulated
VWA5A	Pig	6.94269e-27	2.68609	232	34	2.5372e-22	Up-regulated
PDK4	Pig	7.57685e-27	2.32882	382	107	2.76896e-22	Up-regulated
PDGFC	Pig	8.67833e-27	6.62109	118	1	3.1715e-22	Up-regulated
ENSSSCG00000015390	Pig	9.02226e-27	1.81766	402	115	3.29719e-22	Up-regulated
MCTP2	Pig	1.06065e-26	3.70061	157	0.01	3.87616e-22	Up-regulated
TRNP1	Pig	1.43476e-26	3.93855	177	16	5.24334e-22	Up-regulated
UGP2	Pig	1.61229e-26	2.03022	461	159	5.89212e-22	Up-regulated
PSMF1	Pig	1.78134e-26	1.61785	421	127	6.5099e-22	Up-regulated
DENND5B	Pig	1.80438e-26	1.48174	685	378	6.59411e-22	Up-regulated
AVPI1	Pig	2.79778e-26	3.45104	197	23	1.02245e-21	Up-regulated
AWN	Pig	2.89773e-26	8.46938	0.11	0	1.05898e-21	Up-regulated
ART3	Pig	2.89773e-26	8.49132	0.11	0	1.05898e-21	Up-regulated
C8orf34	Pig	3.60727e-26	3.68401	181	18	1.31828e-21	Up-regulated
MYCBP2	Pig	4.63522e-26	1.06299	819	554	1.69394e-21	Up-regulated
ENSSSCG00000039582	Pig	7.07069e-26	1.80154	449	151	2.58398e-21	Up-regulated
ENSSSCG00000013260	Pig	7.28271e-26	2.13968	303	67	2.66147e-21	Up-regulated
TYMS	Pig	1.1442e-25	2.62182	224	33	4.18148e-21	Up-regulated
IL4R	Pig	1.21902e-25	1.98111	413	135	4.45491e-21	Up-regulated
SH3GLB1	Pig	1.77833e-25	1.11889	764	427	6.49889e-21	Up-regulated
PARP3	Pig	1.94547e-25	2.98511	189	21	7.10973e-21	Up-regulated
ANKRD1	Pig	2.29506e-25	10.5416	106	0	8.3873e-21	Up-regulated
RIMS2	Pig	2.36891e-25	3.70666	161	13	8.65717e-21	Up-regulated
MNDA	Pig	3.05404e-25	2.85402	224	35	1.1161e-20	Up-regulated
ENSSSCG00000033089	Pig	3.22587e-25	2.09218	323	0.08	1.1789e-20	Up-regulated
RPLP0	Pig	3.32217e-25	1.76393	417	134	1.21409e-20	Up-regulated
FKBP5	Pig	3.75094e-25	0.825933	933	816	1.37078e-20	Up-regulated
TAL1	Pig	4.18728e-25	1.63481	358	98	1.53024e-20	Up-regulated
SOCS1	Pig	5.7731e-25	3.18533	146	9	2.10978e-20	Up-regulated
NAMPT	Pig	1.03107e-24	1.8957	421	0.14	3.76805e-20	Up-regulated
UBE2V2	Pig	1.37745e-24	1.45472	591	268	5.0339e-20	Up-regulated
CD46	Human	1.64271e-24	5.56551	118	3	6.00328e-20	Up-regulated
MOV10	Pig	2.26705e-24	1.76612	343	89	8.28492e-20	Up-regulated
PSMB9	Pig	2.29443e-24	3.03108	213	32	8.38499e-20	Up-regulated
PSMA6	Pig	2.76757e-24	1.54886	551	0.23	1.01141e-19	Up-regulated
RPL28	Pig	2.8696e-24	1.37714	551	214	1.0487e-19	Up-regulated
PSMC6	Pig	3.40991e-24	1.37292	575	252	1.24615e-19	Up-regulated
ITSN1	Pig	3.81983e-24	1.87429	433	147	1.39596e-19	Up-regulated
FGGY	Pig	4.43393e-24	1.61982	425	141	1.62038e-19	Up-regulated
6,00 LSM	Pig	4.7116e-24	1.81484	429	151	1.72185e-19	Up-regulated
NUFIP2	Pig	5.13235e-24	1.18071	709	387	1.87562e-19	Up-regulated
DDX5	Pig	5.25156e-24	1.23275	744	464	1.91918e-19	Up-regulated
RPS29	Pig	8.48154e-24	1.62541	409	131	3.09958e-19	Up-regulated
RAD51B	Pig	1.01695e-23	1.29609	713	389	3.71644e-19	Up-regulated
XPC	Pig	1.39048e-23	1.47176	413	0.13	5.0815e-19	Up-regulated
HOGA1	Pig	1.42852e-23	8.43319	98	0	5.22054e-19	Up-regulated
PNPT1	Pig	1.67787e-23	1.53139	362	103	6.13177e-19	Up-regulated
ID3	Pig	3.26695e-23	2.18611	331	92	1.19391e-18	Up-regulated
CAVIN3	Pig	3.60246e-23	1.33806	469	0.17	1.31652e-18	Up-regulated
GSN	Pig	4.52648e-23	1.38241	543	241	1.6542e-18	Up-regulated
IL1R1	Pig	5.39761e-23	2.87009	224	0.04	1.97255e-18	Up-regulated
ITGAV	Pig	5.98279e-23	1.31364	657	354	2.18641e-18	Up-regulated
PSMB2	Pig	7.71347e-23	1.63393	449	166	2.81889e-18	Up-regulated
LIPA	Pig	8.99465e-23	1.612	0.48	0.19	3.28709e-18	Up-regulated
PHC3	Pig	1.07995e-22	1.01991	756	0.42	3.94666e-18	Up-regulated
ENSSSCG00000009523	Pig	1.12279e-22	8.43142	94	0	4.10322e-18	Up-regulated
ENSSSCG00000041364	Pig	1.52837e-22	3.189	189	27	5.58541e-18	Up-regulated
CCDC6	Pig	1.69042e-22	1.65354	461	175	6.17762e-18	Up-regulated
ENSSSCG00000000703	Pig	1.75849e-22	4.01723	0.13	8	6.4264e-18	Up-regulated
ZC3HAV1	Pig	1.7613e-22	0.976686	618	297	6.43666e-18	Up-regulated
PPM1K	Pig	1.88735e-22	3.1152	193	29	6.8973e-18	Up-regulated
TMTC1	Pig	2.26045e-22	1.23556	547	234	8.26081e-18	Up-regulated
FABP4	Pig	2.38934e-22	1.34429	0.65	362	8.73185e-18	Up-regulated
ENSSSCG00000006324	Pig	3.17937e-22	3.73961	0.15	14	1.1619e-17	Up-regulated
ZNF827	Pig	3.431e-22	1.80201	457	172	1.25386e-17	Up-regulated
LRRFIP1	Pig	6.09958e-22	1.33352	606	308	2.22909e-17	Up-regulated
FMO1	Pig	7.06344e-22	1.30128	638	339	2.58134e-17	Up-regulated
SUPT3H	Pig	7.36519e-22	1.27048	516	208	2.69161e-17	Up-regulated
C3orf38	Pig	7.62078e-22	1.64136	0.39	129	2.78501e-17	Up-regulated
USP25	Pig	9.15442e-22	1.01198	811	585	3.34548e-17	Up-regulated
HSPA8	Pig	9.69562e-22	1.2	567	265	3.54327e-17	Up-regulated
ACER2	Pig	1.44229e-21	2.22409	244	51	5.27083e-17	Up-regulated
ENSSSCG00000030801	Pig	2.11123e-21	1.2822	335	94	7.71549e-17	Up-regulated
STOM	Pig	2.15627e-21	1.12036	685	362	7.88008e-17	Up-regulated
SRSF5	Pig	2.4226e-21	1.73919	366	119	8.85341e-17	Up-regulated
COX5B	Pig	2.81502e-21	2.85945	181	26	1.02875e-16	Up-regulated
PLXNC1	Pig	3.11292e-21	3.26085	146	14	1.13762e-16	Up-regulated
SAT1	Pig	3.26998e-21	1.09515	551	245	1.19501e-16	Up-regulated
CEBPB	Pig	3.54198e-21	2.72047	185	28	1.29442e-16	Up-regulated
CD47	Pig	3.84267e-21	1.25263	614	313	1.4043e-16	Up-regulated
MYL12A	Pig	4.9189e-21	1.34167	0.48	196	1.79761e-16	Up-regulated
IFIT2	Pig	6.29271e-21	1.19659	524	226	2.29967e-16	Up-regulated
RPP30	Pig	8.00347e-21	4.72988	114	6	2.92487e-16	Up-regulated
CHMP5	Pig	8.16859e-21	1.91197	232	47	2.98521e-16	Up-regulated
CISH	Pig	9.64131e-21	4.29314	0.11	5	3.52342e-16	Up-regulated
FGF13	Pig	1.45043e-20	7.33094	91	1	5.30058e-16	Up-regulated
TMEM123	Pig	1.70077e-20	1.81921	378	134	6.21547e-16	Up-regulated
UNC93B1	Pig	2.46406e-20	2.92111	138	13	9.0049e-16	Up-regulated
CEBPD	Pig	3.02541e-20	2.39421	201	36	1.10563e-15	Up-regulated
COL11A1	Pig	4.42984e-20	3.9153	126	0.01	1.61888e-15	Up-regulated
DYNC1I1	Pig	5.37461e-20	8.06827	83	0	1.96415e-15	Up-regulated
P379-gp61	pCMV	5.37461e-20	10.5972	83	0	1.96415e-15	Up-regulated
ENSSSCG00000015632	Pig	5.51336e-20	4.88716	0.11	6	2.01486e-15	Up-regulated
FAM171B	Pig	6.17191e-20	1.75776	0.24	53	2.25552e-15	Up-regulated
CTSS	Pig	6.20742e-20	1.87959	287	77	2.2685e-15	Up-regulated
PPM1L	Pig	6.66812e-20	3.19195	209	41	2.43686e-15	Up-regulated
SNAI2	Pig	7.91641e-20	2.63311	165	23	2.89305e-15	Up-regulated
TBX3	Pig	8.16237e-20	1.79781	327	101	2.98294e-15	Up-regulated
EMP2	Pig	8.28911e-20	1.64323	433	173	3.02925e-15	Up-regulated
ARL14EP	Pig	1.13194e-19	1.90284	287	78	4.13667e-15	Up-regulated
PRRG4	Pig	1.14224e-19	6.95115	87	1	4.1743e-15	Up-regulated
LRRC8D	Pig	1.4912e-19	1.24563	429	162	5.44958e-15	Up-regulated
ENDOV	Pig	1.49894e-19	1.5425	323	97	5.47786e-15	Up-regulated
CCDC14	Pig	1.95751e-19	1.4888	429	165	7.15374e-15	Up-regulated
SYBU	Pig	2.0114e-19	1.07904	543	241	7.35066e-15	Up-regulated
DDX21	Pig	2.66538e-19	1.55685	346	111	9.74064e-15	Up-regulated
ADORA2A	Pig	2.76288e-19	2.22313	217	45	1.0097e-14	Up-regulated
ZFP36L2	Pig	3.27302e-19	1.025	709	416	1.19612e-14	Up-regulated
SCFD2	Pig	3.5206e-19	1.10309	618	304	1.2866e-14	Up-regulated
CCDC91	Pig	3.52294e-19	1.28229	484	207	1.28746e-14	Up-regulated
PLAT	Pig	3.79451e-19	2.4474	185	32	1.3867e-14	Up-regulated
ENSSSCG00000027725	Pig	4.18569e-19	7.65645	79	0	1.52966e-14	Up-regulated
P379-gp03	pCMV	4.18569e-19	10.1936	79	0	1.52966e-14	Up-regulated
PLAG1	Pig	4.61046e-19	4.30918	0.11	7	1.68489e-14	Up-regulated
IGF2BP2	Pig	5.16944e-19	0.99822	724	0.42	1.88917e-14	Up-regulated
SPG11	Pig	5.34749e-19	1.63566	0.39	143	1.95424e-14	Up-regulated
ODF2L	Pig	5.50542e-19	4.13038	102	5	2.01195e-14	Up-regulated
CDKN1A	Pig	6.08263e-19	1.6112	264	68	2.2229e-14	Up-regulated
SLCO2A1	Pig	7.37905e-19	1.0065	657	366	2.69667e-14	Up-regulated
ENSSSCG00000035811	Pig	7.57105e-19	1.59065	291	83	2.76684e-14	Up-regulated
RHBDD1	Pig	8.44073e-19	1.38213	362	125	3.08467e-14	Up-regulated
REXO2	Pig	8.55358e-19	1.53094	339	0.11	3.1259e-14	Up-regulated
NEBL	Pig	1.21263e-18	1.14948	461	198	4.43154e-14	Up-regulated
LMNTD1	Pig	1.2862e-18	2.73756	161	24	4.70043e-14	Up-regulated
MPC2	Pig	1.33604e-18	2.20555	287	87	4.88256e-14	Up-regulated
TRIM26	Pig	1.55617e-18	1.14414	358	0.12	5.68702e-14	Up-regulated
ENSSSCG00000016868	Pig	1.57982e-18	1.00036	0.76	0.47	5.77345e-14	Up-regulated
CDKL3	Pig	1.6499e-18	5.54267	87	2	6.02957e-14	Up-regulated
PSME2	Pig	1.73447e-18	2.08672	177	0.03	6.33862e-14	Up-regulated
ENSSSCG00000005453	Pig	1.75689e-18	1.74744	264	0.07	6.42055e-14	Up-regulated
HSP90B1	Pig	1.95071e-18	1.43815	394	148	7.12888e-14	Up-regulated
ASPDH	Pig	2.83485e-18	4.22921	106	7	1.03599e-13	Up-regulated
B4GALT5	Pig	2.88393e-18	1.46289	465	199	1.05393e-13	Up-regulated
ST3GAL6	Pig	2.88779e-18	1.2292	547	266	1.05534e-13	Up-regulated
ZCCHC2	Pig	3.00947e-18	1.02038	496	215	1.09981e-13	Up-regulated
MCCC1	Pig	3.14067e-18	1.39723	469	207	1.14776e-13	Up-regulated
HMOX1	Human	3.25311e-18	8.42124	75	0	1.18885e-13	Up-regulated
P379-gp32	pCMV	3.25311e-18	10.9854	75	0	1.18885e-13	Up-regulated
FAM151B	Pig	3.40322e-18	1.86932	252	64	1.24371e-13	Up-regulated
ALPK1	Pig	3.47997e-18	1.78579	217	47	1.27175e-13	Up-regulated
INVS	Pig	4.09051e-18	1.24933	535	256	1.49488e-13	Up-regulated
SDCBP	Pig	4.91461e-18	1.01996	602	0.32	1.79605e-13	Up-regulated
SRPK2	Pig	5.81425e-18	0.800095	0.78	483	2.12482e-13	Up-regulated
HTRA1	Pig	5.96884e-18	1.10541	531	254	2.18131e-13	Up-regulated
BNC2	Pig	7.34485e-18	1.65125	331	111	2.68418e-13	Up-regulated
ENSSSCG00000031838	Pig	8.46307e-18	1.62704	343	119	3.09283e-13	Up-regulated
NSD3	Pig	1.18302e-17	1.0333	646	364	4.32335e-13	Up-regulated
TCIRG1	Pig	1.51316e-17	1.93492	177	32	5.52984e-13	Up-regulated
PDCD4	Pig	1.53158e-17	1.71658	295	91	5.59718e-13	Up-regulated
LAMP2	Pig	1.58742e-17	1.31218	449	193	5.80123e-13	Up-regulated
MYLK	Pig	1.92845e-17	2.90727	193	41	7.04754e-13	Up-regulated
POLK	Pig	2.24867e-17	1.86076	307	99	8.21777e-13	Up-regulated
SCMH1	Pig	2.48106e-17	1.73773	358	135	9.06705e-13	Up-regulated
SFXN1	Pig	2.51628e-17	1.72605	335	119	9.19574e-13	Up-regulated
P379-gp06	pCMV	2.52348e-17	9.53979	71	0	9.22205e-13	Up-regulated
P379-gp17	pCMV	2.52348e-17	9.08271	71	0	9.22205e-13	Up-regulated
P379-gp70	pCMV	2.52348e-17	10.1088	71	0	9.22205e-13	Up-regulated
SLC35A1	Pig	2.71874e-17	1.36492	382	146	9.93562e-13	Up-regulated
CRP	Pig	2.81812e-17	3.31517	102	7	1.02988e-12	Up-regulated
PSMA3	Pig	3.11635e-17	1.31963	374	139	1.13887e-12	Up-regulated
TBC1D1	Pig	3.2597e-17	1.04609	0.61	0.32	1.19126e-12	Up-regulated
POLR1F	Pig	3.74195e-17	1.50068	346	122	1.3675e-12	Up-regulated
HAO2	Pig	3.89167e-17	2.51107	157	25	1.42221e-12	Up-regulated
ACOT9	Pig	4.58405e-17	1.22164	409	0.16	1.67524e-12	Up-regulated
TIMP1	Pig	6.06735e-17	1.48743	319	106	2.21731e-12	Up-regulated
TTC23	Pig	6.85286e-17	2.03333	217	52	2.50438e-12	Up-regulated
S100A6	Pig	7.36918e-17	1.46888	252	69	2.69307e-12	Up-regulated
ENSSSCG00000034802	Pig	8.86124e-17	3.16645	126	15	3.23834e-12	Up-regulated
TLR3	Pig	9.92504e-17	1.61206	173	32	3.62711e-12	Up-regulated
LTBP1	Pig	1.26516e-16	1.28627	496	235	4.62353e-12	Up-regulated
ATP1B1	Pig	1.40991e-16	2.08709	268	82	5.15251e-12	Up-regulated
WDR83OS	Pig	1.50953e-16	1.81698	272	83	5.5166e-12	Up-regulated
RPS7	Pig	1.51017e-16	0.973907	417	169	5.5189e-12	Up-regulated
CRACR2A	Pig	1.55134e-16	4.68361	87	4	5.66937e-12	Up-regulated
ABCD4	Pig	1.93787e-16	1.79446	213	51	7.08196e-12	Up-regulated
ENSSSCG00000031589	Pig	1.95405e-16	7.53677	67	0	7.14107e-12	Up-regulated
USP2	Pig	1.95405e-16	7.43294	67	0	7.14107e-12	Up-regulated
FGL2	Pig	1.95405e-16	7.75519	67	0	7.14107e-12	Up-regulated
P379-gp04	pCMV	1.95405e-16	9.55079	67	0	7.14107e-12	Up-regulated
P379-gp25	pCMV	1.95405e-16	11.9822	67	0	7.14107e-12	Up-regulated
P379-gp35	pCMV	1.95405e-16	9.15557	67	0	7.14107e-12	Up-regulated
P379-gp79	pCMV	1.95405e-16	8.46838	67	0	7.14107e-12	Up-regulated
LARP4	Pig	1.99209e-16	1.3912	429	188	7.28009e-12	Up-regulated
TAF4B	Pig	2.31673e-16	1.88283	217	53	8.46648e-12	Up-regulated
ERAP2	Pig	2.52186e-16	1.61456	224	57	9.21614e-12	Up-regulated
ENSSSCG00000001398	Pig	3.00036e-16	1.33033	307	106	1.09648e-11	Up-regulated
MAP3K13	Pig	3.00961e-16	2.17437	185	39	1.09986e-11	Up-regulated
TNFRSF11A	Pig	3.03638e-16	1.02868	543	281	1.10965e-11	Up-regulated
PXK	Pig	3.80046e-16	1.28379	472	217	1.38888e-11	Up-regulated
ATXN7L1	Pig	3.95637e-16	1.49801	327	116	1.44586e-11	Up-regulated
CCL14	Pig	3.96036e-16	2.26923	165	31	1.44731e-11	Up-regulated
KRT10	Pig	4.04581e-16	3.0828	126	16	1.47854e-11	Up-regulated
IARS1	Pig	4.18673e-16	1.16932	476	221	1.53004e-11	Up-regulated
ENSSSCG00000014186	Pig	4.44345e-16	5.63002	71	1	1.62386e-11	Up-regulated
ENSSSCG00000013906	Pig	4.49607e-16	1.19514	0.35	128	1.64309e-11	Up-regulated
PABPC1	Pig	4.99555e-16	1.06705	425	181	1.82562e-11	Up-regulated
GRN	Pig	5.71522e-16	1.84474	268	83	2.08863e-11	Up-regulated
PPIB	Pig	6.14858e-16	2.11486	193	43	2.247e-11	Up-regulated
ENSSSCG00000035080	Pig	7.00214e-16	1.95185	217	55	2.55893e-11	Up-regulated
ARMC2	Pig	7.79514e-16	1.91899	299	105	2.84873e-11	Up-regulated
WDR17	Pig	8.23104e-16	2.23086	205	0.05	3.00803e-11	Up-regulated
ABHD17B	Pig	8.23809e-16	1.50018	343	127	3.01061e-11	Up-regulated
ENSSSCG00000033310	Pig	8.35848e-16	1.07844	449	194	3.05461e-11	Up-regulated
RGS2	Pig	9.03013e-16	1.09936	465	0.22	3.30006e-11	Up-regulated
ENPP4	Pig	9.37771e-16	1.8268	268	84	3.42708e-11	Up-regulated
GPCPD1	Pig	1.20385e-15	1.33473	394	163	4.39949e-11	Up-regulated
HSPA4	Pig	1.27106e-15	1.37004	362	142	4.6451e-11	Up-regulated
SEC62	Pig	1.3604e-15	0.943098	602	0.33	4.97157e-11	Up-regulated
SLC39A11	Pig	1.463e-15	0.974396	484	218	5.34652e-11	Up-regulated
P379-gp14	pCMV	1.51072e-15	8.82907	63	0	5.52093e-11	Up-regulated
P379-gp20	pCMV	1.51072e-15	8.51894	63	0	5.52093e-11	Up-regulated
P379-gp23	pCMV	1.51072e-15	10.5443	63	0	5.52093e-11	Up-regulated
P379-gp34	pCMV	1.51072e-15	9.80321	63	0	5.52093e-11	Up-regulated
P379-gp45	pCMV	1.51072e-15	12.6216	63	0	5.52093e-11	Up-regulated
P379-gp46	pCMV	1.51072e-15	11.1194	63	0	5.52093e-11	Up-regulated
P379-gp60	pCMV	1.51072e-15	10.0994	63	0	5.52093e-11	Up-regulated
P379-gp68	pCMV	1.51072e-15	9.88048	63	0	5.52093e-11	Up-regulated
P379-gp78	pCMV	1.51072e-15	9.27415	63	0	5.52093e-11	Up-regulated
SLC25A36	Pig	1.76376e-15	1.00096	638	381	6.44565e-11	Up-regulated
NR5A2	Pig	1.91141e-15	1.86429	217	57	6.98523e-11	Up-regulated
ENSSSCG00000014540	Pig	1.997e-15	1.19294	402	0.17	7.29803e-11	Up-regulated
CEP70	Pig	2.40581e-15	2.57621	146	25	8.79204e-11	Up-regulated
ARHGAP12	Pig	2.78732e-15	2.35602	189	44	1.01863e-10	Up-regulated
HSD11B1L	Pig	2.82919e-15	1.13995	0.37	146	1.03393e-10	Up-regulated
LAPTM4A	Pig	3.16402e-15	1.30676	378	156	1.15629e-10	Up-regulated
TMEM106A	Pig	3.23785e-15	2.55528	138	22	1.18327e-10	Up-regulated
RNH1	Pig	3.88827e-15	1.71131	252	76	1.42097e-10	Up-regulated
ZCCHC24	Pig	3.89852e-15	1.25713	413	182	1.42472e-10	Up-regulated
HACD1	Pig	4.70395e-15	1.73238	0.26	82	1.71906e-10	Up-regulated
RNF115	Pig	5.14156e-15	1.1887	492	248	1.87898e-10	Up-regulated
TRA2B	Pig	5.59041e-15	0.679178	661	367	2.04301e-10	Up-regulated
NMD3	Pig	6.4894e-15	1.75298	252	78	2.37155e-10	Up-regulated
OSMR	Pig	6.81795e-15	0.865624	508	252	2.49162e-10	Up-regulated
ENSSSCG00000013715	Pig	6.87244e-15	2.11979	201	52	2.51153e-10	Up-regulated
UCK2	Pig	6.93767e-15	1.6171	339	132	2.53537e-10	Up-regulated
ENSSSCG00000000530	Pig	7.17387e-15	1.23044	362	146	2.62169e-10	Up-regulated
PYGM	Pig	8.97458e-15	1.0574	409	175	3.27976e-10	Up-regulated
NDUFA4	Pig	9.31358e-15	2.03531	213	58	3.40365e-10	Up-regulated
GCLM	Pig	1.01477e-14	2.04247	165	34	3.70848e-10	Up-regulated
PSMB1	Pig	1.07091e-14	2.2491	169	37	3.91363e-10	Up-regulated
DHX58	Pig	1.10845e-14	3.05977	106	12	4.05083e-10	Up-regulated
PLIN2	Pig	1.11975e-14	3.17344	106	12	4.09212e-10	Up-regulated
SORBS1	Pig	1.12039e-14	0.716427	0.72	461	4.09445e-10	Up-regulated
ENSSSCG00000039544	Pig	1.12869e-14	0.965238	559	305	4.12481e-10	Up-regulated
ENSSSCG00000020830	Pig	1.14567e-14	1.80407	252	0.08	4.18686e-10	Up-regulated
PHF11	Pig	1.16324e-14	0.775729	673	399	4.25105e-10	Up-regulated
P379-gp26	pCMV	1.16637e-14	10.3497	59	0	4.26251e-10	Up-regulated
P379-gp27	pCMV	1.16637e-14	9.07079	59	0	4.26251e-10	Up-regulated
P379-gp31	pCMV	1.16637e-14	9.38232	59	0	4.26251e-10	Up-regulated
P379-gp33	pCMV	1.16637e-14	10.5651	59	0	4.26251e-10	Up-regulated
P379-gp50	pCMV	1.16637e-14	10.9097	59	0	4.26251e-10	Up-regulated
P379-gp55	pCMV	1.16637e-14	8.52863	59	0	4.26251e-10	Up-regulated
P379-gp56	pCMV	1.16637e-14	10.1479	59	0	4.26251e-10	Up-regulated
P379-gp75	pCMV	1.16637e-14	8.72294	59	0	4.26251e-10	Up-regulated
NOP58	Pig	1.23561e-14	0.950047	441	197	4.51555e-10	Up-regulated
QDPR	Pig	1.35804e-14	1.68822	268	89	4.96298e-10	Up-regulated
ENSSSCG00000030849	Pig	1.41413e-14	1.46479	0.26	84	5.16793e-10	Up-regulated
CD36	Pig	1.45387e-14	1.26594	602	389	5.31318e-10	Up-regulated
PSMD11	Pig	1.57065e-14	1.40179	327	126	5.73994e-10	Up-regulated
IL6ST	Pig	1.8056e-14	0.934705	539	282	6.59856e-10	Up-regulated
MORC3	Pig	1.95899e-14	1.38985	299	107	7.15912e-10	Up-regulated
TRIM21	Pig	2.35472e-14	1.71561	157	32	8.60534e-10	Up-regulated
PAPSS2	Pig	2.51471e-14	3.44077	0.11	14	9.19e-10	Up-regulated
C20orf96	Pig	2.57873e-14	5.54577	63	1	9.42396e-10	Up-regulated
SLC38A9	Pig	2.61604e-14	0.987378	484	0.24	9.56031e-10	Up-regulated
DMTF1	Pig	2.67034e-14	1.61039	264	88	9.75874e-10	Up-regulated
BRI3	Pig	2.80913e-14	1.70397	138	24	1.0266e-09	Up-regulated
PIK3AP1	Pig	2.94844e-14	2.99289	0.11	14	1.07751e-09	Up-regulated
GRM5	Pig	3.08492e-14	2.4481	161	34	1.12738e-09	Up-regulated
SRSF10	Pig	3.55385e-14	1.03965	469	232	1.29875e-09	Up-regulated
CYB561	Pig	3.69445e-14	2.75294	94	9	1.35014e-09	Up-regulated
CTSB	Pig	3.81866e-14	1.37825	319	0.12	1.39553e-09	Up-regulated
ENSSSCG00000033189	Pig	3.92502e-14	1.15593	335	132	1.4344e-09	Up-regulated
HIBADH	Pig	4.2645e-14	1.90513	268	93	1.55846e-09	Up-regulated
ARGLU1	Pig	4.33019e-14	0.546748	811	551	1.58247e-09	Up-regulated
ANGPTL4	Pig	4.60583e-14	2.1068	165	36	1.6832e-09	Up-regulated
ATP5MC1	Pig	5.06765e-14	2.28022	154	31	1.85197e-09	Up-regulated
CCDC180	Pig	5.31893e-14	0.775565	445	205	1.9438e-09	Up-regulated
AEN	Pig	5.35846e-14	3.03698	122	19	1.95825e-09	Up-regulated
RNF114	Pig	5.81461e-14	2.02485	161	35	2.12495e-09	Up-regulated
NEMP2	Pig	5.8177e-14	1.1077	276	92	2.12608e-09	Up-regulated
CNN3	Pig	5.82097e-14	1.15993	339	135	2.12727e-09	Up-regulated
SERPINB1	Pig	6.33298e-14	1.98789	0.15	0.03	2.31439e-09	Up-regulated
STX17	Pig	6.46524e-14	1.29735	429	207	2.36272e-09	Up-regulated
ENSSSCG00000039009	Pig	6.54853e-14	3.61542	83	6	2.39316e-09	Up-regulated
ZBTB5	Pig	7.02771e-14	2.75994	122	19	2.56828e-09	Up-regulated
COX7A2	Pig	7.12803e-14	1.86214	193	0.05	2.60494e-09	Up-regulated
ATP2A2	Pig	7.64286e-14	1.76259	323	134	2.79308e-09	Up-regulated
SNX25	Pig	7.8126e-14	0.841739	571	317	2.85512e-09	Up-regulated
CRACDL	Pig	8.99507e-14	7.18421	55	0	3.28725e-09	Up-regulated
MGST1	Pig	8.99507e-14	6.8958	55	0	3.28725e-09	Up-regulated
CCL5	Pig	8.99507e-14	9.80666	55	0	3.28725e-09	Up-regulated
P379-gp18	pCMV	8.99507e-14	8.65134	55	0	3.28725e-09	Up-regulated
P379-gp22	pCMV	8.99507e-14	9.37486	55	0	3.28725e-09	Up-regulated
P379-gp24	pCMV	8.99507e-14	10.3328	55	0	3.28725e-09	Up-regulated
P379-gp36	pCMV	8.99507e-14	8.49827	55	0	3.28725e-09	Up-regulated
P379-gp41	pCMV	8.99507e-14	11.1991	55	0	3.28725e-09	Up-regulated
P379-gp48	pCMV	8.99507e-14	10.6134	55	0	3.28725e-09	Up-regulated
P379-gp57	pCMV	8.99507e-14	10.117	55	0	3.28725e-09	Up-regulated
P379-gp59	pCMV	8.99507e-14	10.1586	55	0	3.28725e-09	Up-regulated
P379-gp71	pCMV	8.99507e-14	8.63689	55	0	3.28725e-09	Up-regulated
P379-gp73	pCMV	8.99507e-14	11.7003	55	0	3.28725e-09	Up-regulated
RPSA	Pig	1.00128e-13	1.01122	327	126	3.65919e-09	Up-regulated
AOPEP	Pig	1.06471e-13	0.59585	886	696	3.89097e-09	Up-regulated
CLIP1	Pig	1.14623e-13	1.11565	0.5	265	4.18889e-09	Up-regulated
TRAF3IP2	Pig	1.2206e-13	0.991618	398	168	4.4607e-09	Up-regulated
PSMD14	Pig	1.3452e-13	1.05437	469	234	4.91602e-09	Up-regulated
PRKDC	Pig	1.38243e-13	1.45893	335	135	5.0521e-09	Up-regulated
ZNF22	Pig	1.38366e-13	1.87527	134	24	5.0566e-09	Up-regulated
RPL15	Pig	1.74817e-13	1.03931	354	149	6.3887e-09	Up-regulated
ATP5MC3	Pig	1.91163e-13	2.95278	106	14	6.98607e-09	Up-regulated
ZDHHC23	Pig	1.91172e-13	1.94105	181	46	6.98638e-09	Up-regulated
CNP	Pig	1.98517e-13	1.92	106	14	7.25479e-09	Up-regulated
ENSSSCG00000041649	Pig	2.00508e-13	2.35248	161	37	7.32756e-09	Up-regulated
USP53	Pig	2.12875e-13	1.46635	461	245	7.77951e-09	Up-regulated
AHCTF1	Pig	2.15306e-13	1.01191	394	171	7.86836e-09	Up-regulated
SAMHD1	Pig	2.23271e-13	2.00769	224	0.07	8.15944e-09	Up-regulated
LNPK	Pig	2.4609e-13	1.58216	283	103	8.99334e-09	Up-regulated
ATP5IF1	Pig	2.61226e-13	2.49333	122	0.02	9.54652e-09	Up-regulated
NAA25	Pig	2.64823e-13	1.19951	331	134	9.67795e-09	Up-regulated
DBT	Pig	2.70624e-13	2.09185	169	41	9.88997e-09	Up-regulated
LRP11	Pig	2.76583e-13	0.967729	433	209	1.01077e-08	Up-regulated
ZC3H6	Pig	3.0534e-13	1.26923	346	145	1.11586e-08	Up-regulated
RPL35	Pig	3.47328e-13	1.06061	398	182	1.26931e-08	Up-regulated
THSD7A	Pig	3.93821e-13	1.32783	283	103	1.43922e-08	Up-regulated
ENSSSCG00000022724	Pig	3.9606e-13	4.52574	67	3	1.4474e-08	Up-regulated
LRIF1	Pig	3.97696e-13	1.839	142	28	1.45338e-08	Up-regulated
ZNRF3	Pig	4.02546e-13	1.48135	299	115	1.4711e-08	Up-regulated
ANGPT1	Pig	4.0665e-13	3.10405	98	12	1.4861e-08	Up-regulated
CD55	Human	4.3375e-13	2.90933	71	4	1.58514e-08	Up-regulated
PDIA3	Pig	4.37708e-13	1.05394	429	206	1.5996e-08	Up-regulated
ACKR2	Pig	4.43187e-13	4.11321	75	5	1.61963e-08	Up-regulated
RPL11	Pig	4.45856e-13	1.18197	378	168	1.62938e-08	Up-regulated
RAB9A	Pig	5.02377e-13	1.68456	248	83	1.83594e-08	Up-regulated
COX17	Pig	5.16254e-13	1.77259	248	86	1.88665e-08	Up-regulated
RICTOR	Pig	6.5259e-13	0.872514	709	474	2.38489e-08	Up-regulated
KCNC1	Pig	6.93135e-13	7.75177	51	0	2.53306e-08	Up-regulated
GPR39	Pig	6.93135e-13	8.55221	51	0	2.53306e-08	Up-regulated
ACKR1	Pig	6.93135e-13	8.41141	51	0	2.53306e-08	Up-regulated
ENSSSCG00000051097	Pig	6.93135e-13	7.15939	51	0	2.53306e-08	Up-regulated
MPP7	Pig	6.93135e-13	7.31275	51	0	2.53306e-08	Up-regulated
P379-gp02	pCMV	6.93135e-13	8.01955	51	0	2.53306e-08	Up-regulated
P379-gp09	pCMV	6.93135e-13	10.5395	51	0	2.53306e-08	Up-regulated
P379-gp21	pCMV	6.93135e-13	8.28157	51	0	2.53306e-08	Up-regulated
P379-gp37	pCMV	6.93135e-13	8.69809	51	0	2.53306e-08	Up-regulated
P379-gp38	pCMV	6.93135e-13	9.40048	51	0	2.53306e-08	Up-regulated
P379-gp40	pCMV	6.93135e-13	8.99983	51	0	2.53306e-08	Up-regulated
P379-gp49	pCMV	6.93135e-13	11.4407	51	0	2.53306e-08	Up-regulated
P379-gp51	pCMV	6.93135e-13	8.69139	51	0	2.53306e-08	Up-regulated
P379-gp62	pCMV	6.93135e-13	9.27175	51	0	2.53306e-08	Up-regulated
P379-gp65	pCMV	6.93135e-13	9.44547	51	0	2.53306e-08	Up-regulated
P379-gp67	pCMV	6.93135e-13	10.0533	51	0	2.53306e-08	Up-regulated
P379-gp69	pCMV	6.93135e-13	7.85124	51	0	2.53306e-08	Up-regulated
DNAJC7	Pig	6.96391e-13	1.49653	299	118	2.54496e-08	Up-regulated
ATP6V0A1	Pig	7.06729e-13	1.24484	323	0.13	2.58274e-08	Up-regulated
NFKBIZ	Pig	7.26227e-13	0.868173	693	464	2.654e-08	Up-regulated
MRPL57	Pig	7.78064e-13	2.27772	134	26	2.84343e-08	Up-regulated
HNRNPU	Pig	7.7865e-13	0.795291	594	328	2.84557e-08	Up-regulated
CNBP	Pig	7.78717e-13	1.16898	327	132	2.84582e-08	Up-regulated
1,00 PES	Pig	8.1285e-13	1.78223	165	0.04	2.97056e-08	Up-regulated
ENSSSCG00000012427	Pig	8.33594e-13	1.49367	256	89	3.04637e-08	Up-regulated
S100A11	Pig	8.98566e-13	0.876212	319	125	3.28381e-08	Up-regulated
ACBD3	Pig	1.08721e-12	1.10847	303	119	3.97323e-08	Up-regulated
LPIN3	Pig	1.09949e-12	2.41516	91	0.01	4.01807e-08	Up-regulated
HSPB1	Pig	1.15545e-12	0.798872	555	314	4.22259e-08	Up-regulated
URI1	Pig	1.15985e-12	0.816012	492	247	4.23868e-08	Up-regulated
NUB1	Pig	1.17828e-12	0.876688	406	188	4.30602e-08	Up-regulated
ACOT13	Pig	1.21481e-12	1.68973	228	74	4.43954e-08	Up-regulated
OGFOD1	Pig	1.244e-12	1.59403	189	52	4.54619e-08	Up-regulated
MERTK	Pig	1.27948e-12	0.764511	445	214	4.67584e-08	Up-regulated
RHOJ	Pig	1.37658e-12	0.806222	665	428	5.03073e-08	Up-regulated
CMKLR1	Pig	1.50361e-12	2.10701	0.15	34	5.49494e-08	Up-regulated
RARS2	Pig	1.56929e-12	1.00322	362	153	5.73497e-08	Up-regulated
OR6N2	Pig	1.70454e-12	1.61058	138	28	6.22924e-08	Up-regulated
RPS20	Pig	1.75056e-12	0.789838	472	237	6.39744e-08	Up-regulated
MDH1	Pig	1.81105e-12	3.32423	0.11	18	6.61848e-08	Up-regulated
ENSSSCG00000035904	Pig	1.88913e-12	0.666118	535	289	6.90384e-08	Up-regulated
CMAS	Pig	1.89289e-12	1.63751	232	78	6.91758e-08	Up-regulated
ZFAND5	Pig	1.93204e-12	1.09039	362	165	7.06064e-08	Up-regulated
SUPT20H	Pig	2.03163e-12	1.01541	472	241	7.4246e-08	Up-regulated
SLA-DRA	Pig	2.03327e-12	0.96746	272	99	7.43057e-08	Up-regulated
MGST3	Pig	2.06898e-12	1.57934	224	73	7.56108e-08	Up-regulated
HOMER1	Pig	2.25716e-12	4.30649	75	6	8.2488e-08	Up-regulated
ENSSSCG00000014343	Pig	2.28066e-12	1.08367	0.48	259	8.33469e-08	Up-regulated
KIAA0513	Pig	2.34014e-12	1.51038	181	49	8.55206e-08	Up-regulated
ENSSSCG00000016186	Pig	2.43992e-12	1.85437	189	54	8.91669e-08	Up-regulated
RFC2	Pig	2.58546e-12	2.51573	118	21	9.44858e-08	Up-regulated
OLA1	Pig	2.74741e-12	0.852171	449	217	1.00404e-07	Up-regulated
SRSF2	Pig	2.9164e-12	1.18253	319	129	1.0658e-07	Up-regulated
CCNT1	Pig	3.0193e-12	1.34706	354	162	1.1034e-07	Up-regulated
ATP13A3	Pig	3.08971e-12	0.914468	276	104	1.12914e-07	Up-regulated
ENSSSCG00000031037	Pig	3.10135e-12	3.42843	91	11	1.13339e-07	Up-regulated
WDSUB1	Pig	3.11082e-12	1.32434	264	97	1.13685e-07	Up-regulated
NKAIN3	Pig	3.29518e-12	2.92344	71	5	1.20422e-07	Up-regulated
CDHR4	Human	3.4146e-12	2.9942	71	5	1.24787e-07	Up-regulated
TIGAR	Pig	3.62834e-12	2.69193	138	0.03	1.32598e-07	Up-regulated
C21orf91	Pig	3.7235e-12	0.93172	0.35	0.15	1.36075e-07	Up-regulated
NUDT6	Pig	3.7899e-12	1.50946	311	129	1.38502e-07	Up-regulated
UVRAG	Pig	3.83034e-12	0.777057	657	405	1.3998e-07	Up-regulated
DCBLD2	Pig	3.88834e-12	1.40579	299	121	1.42099e-07	Up-regulated
STAM	Pig	3.90373e-12	1.27346	287	113	1.42662e-07	Up-regulated
SLC10A7	Pig	3.97171e-12	0.803425	0.52	281	1.45146e-07	Up-regulated
PTP4A1	Pig	4.14131e-12	1.74184	0.22	73	1.51344e-07	Up-regulated
MTREX	Pig	4.2517e-12	1.00102	472	253	1.55378e-07	Up-regulated
TGFBR3	Pig	4.32258e-12	0.903664	535	305	1.57969e-07	Up-regulated
TXNDC17	Pig	4.97445e-12	2.92283	106	17	1.81791e-07	Up-regulated
NUBPL	Pig	5.00138e-12	1.01777	358	155	1.82776e-07	Up-regulated
RPL10	Pig	5.16021e-12	0.939478	445	223	1.8858e-07	Up-regulated
MGP	Pig	5.33877e-12	7.80439	47	0	1.95105e-07	Up-regulated
DHRS11	Pig	5.33877e-12	6.9262	47	0	1.95105e-07	Up-regulated
P379-gp19	pCMV	5.33877e-12	8.62497	47	0	1.95105e-07	Up-regulated
P379-gp28	pCMV	5.33877e-12	8.37728	47	0	1.95105e-07	Up-regulated
P379-gp29	pCMV	5.33877e-12	8.73579	47	0	1.95105e-07	Up-regulated
P379-gp39	pCMV	5.33877e-12	8.72053	47	0	1.95105e-07	Up-regulated
P379-gp42	pCMV	5.33877e-12	8.76864	47	0	1.95105e-07	Up-regulated
P379-gp44	pCMV	5.33877e-12	7.8472	47	0	1.95105e-07	Up-regulated
P379-gp47	pCMV	5.33877e-12	8.88494	47	0	1.95105e-07	Up-regulated
P379-gp52	pCMV	5.33877e-12	9.20946	47	0	1.95105e-07	Up-regulated
P379-gp58	pCMV	5.33877e-12	8.744	47	0	1.95105e-07	Up-regulated
P379-gp66	pCMV	5.33877e-12	9.18844	47	0	1.95105e-07	Up-regulated
VCP	Pig	5.8228e-12	1.40604	315	136	2.12794e-07	Up-regulated
HMG20A	Pig	6.09435e-12	1.33193	0.28	108	2.22718e-07	Up-regulated
GK5	Pig	6.60353e-12	0.946269	0.39	183	2.41326e-07	Up-regulated
CREBZF	Pig	6.96393e-12	0.967769	386	174	2.54497e-07	Up-regulated
CSTB	Pig	7.09451e-12	1.44212	248	88	2.59269e-07	Up-regulated
TM6SF1	Pig	7.09593e-12	0.850019	287	109	2.59321e-07	Up-regulated
DNAJA1	Pig	7.44231e-12	1.36823	217	69	2.71979e-07	Up-regulated
CACYBP	Pig	7.94159e-12	1.71259	201	62	2.90225e-07	Up-regulated
H2AJ	Pig	8.04371e-12	2.15849	98	14	2.93957e-07	Up-regulated
HSPD1	Pig	8.1825e-12	1.75638	201	63	2.99029e-07	Up-regulated
VCAM1	Pig	8.26268e-12	2.30265	157	0.04	3.0196e-07	Up-regulated
MXD1	Pig	8.49506e-12	2.17324	134	29	3.10452e-07	Up-regulated
ENSSSCG00000039658	Pig	8.59651e-12	1.6027	193	58	3.1416e-07	Up-regulated
HSP90AB1	Pig	8.63813e-12	1.23579	272	102	3.1568e-07	Up-regulated
REV3L	Pig	8.68672e-12	0.809052	661	416	3.17456e-07	Up-regulated
EMC2	Pig	8.74325e-12	1.66065	224	76	3.19522e-07	Up-regulated
ACAP2	Pig	8.76865e-12	0.635833	764	0.5	3.2045e-07	Up-regulated
BCKDHB	Pig	9.09717e-12	1.6748	236	85	3.32456e-07	Up-regulated
ENSSSCG00000039201	Pig	9.44492e-12	2.46925	94	13	3.45165e-07	Up-regulated
RBM5	Pig	1.02143e-11	0.791716	591	358	3.73282e-07	Up-regulated
ZDHHC9	Pig	1.03306e-11	1.83666	146	34	3.77531e-07	Up-regulated
ENSSSCG00000022295	Pig	1.05777e-11	1.96522	169	46	3.86564e-07	Up-regulated
CPNE8	Pig	1.06917e-11	2.91014	91	12	3.9073e-07	Up-regulated
SETD7	Pig	1.07493e-11	1.06676	421	213	3.92833e-07	Up-regulated
HRH1	Pig	1.1023e-11	1.53283	181	52	4.02836e-07	Up-regulated
UBA3	Pig	1.11945e-11	1.46382	224	77	4.09101e-07	Up-regulated
TMCC3	Pig	1.18523e-11	0.612668	638	404	4.33141e-07	Up-regulated
LRRIQ3	Pig	1.20322e-11	3.48773	75	7	4.39716e-07	Up-regulated
REV1	Pig	1.24276e-11	1.70865	276	0.11	4.54166e-07	Up-regulated
ACSL5	Pig	1.3615e-11	0.859374	417	204	4.97562e-07	Up-regulated
PRNP	Pig	1.39187e-11	1.22572	0.22	73	5.0866e-07	Up-regulated
RPS15	Pig	1.48605e-11	0.706852	555	311	5.43077e-07	Up-regulated
ENSSSCG00000025224	Pig	1.50266e-11	1.65073	232	83	5.49148e-07	Up-regulated
STC2	Pig	1.50946e-11	1.17203	335	151	5.51632e-07	Up-regulated
DHX9	Pig	1.54825e-11	0.844419	531	305	5.65808e-07	Up-regulated
CALCOCO2	Pig	1.62941e-11	1.14501	374	178	5.95468e-07	Up-regulated
RNASEL	Pig	1.64808e-11	5.05707	55	2	6.02293e-07	Up-regulated
AP3M1	Pig	1.68071e-11	1.16552	402	0.2	6.14214e-07	Up-regulated
PITRM1	Pig	1.78317e-11	2.09548	126	26	6.51658e-07	Up-regulated
SSR3	Pig	1.78448e-11	1.22911	331	151	6.52137e-07	Up-regulated
MAP1B	Pig	1.79178e-11	0.84461	508	272	6.54805e-07	Up-regulated
DCP2	Pig	1.79887e-11	0.821686	484	266	6.57397e-07	Up-regulated
GPR161	Pig	2.04489e-11	1.11715	567	353	7.47305e-07	Up-regulated
4,00 LSM	Pig	2.06203e-11	4.38423	59	3	7.53568e-07	Up-regulated
TMTC2	Pig	2.08597e-11	0.578415	874	0.66	7.62319e-07	Up-regulated
AIMP1	Pig	2.17736e-11	0.961388	398	194	7.95717e-07	Up-regulated
TMEM168	Pig	2.20407e-11	1.3252	0.26	98	8.05477e-07	Up-regulated
TERF2IP	Pig	2.22029e-11	1.82909	185	56	8.11403e-07	Up-regulated
TCEA3	Pig	2.24694e-11	3.80368	63	4	8.21144e-07	Up-regulated
TRIM38	Pig	2.40106e-11	2.50183	102	17	8.77467e-07	Up-regulated
CPED1	Pig	2.4298e-11	3.53004	83	0.01	8.87972e-07	Up-regulated
SLA-DRB1	Pig	2.44803e-11	1.1793	307	132	8.94631e-07	Up-regulated
RPS27A	Pig	2.4935e-11	0.822769	406	192	9.1125e-07	Up-regulated
HIF1A	Pig	2.56376e-11	0.675349	709	509	9.36925e-07	Up-regulated
UAP1	Pig	2.60078e-11	1.35828	217	74	9.50455e-07	Up-regulated
SLC25A26	Pig	2.74084e-11	1.30096	236	84	1.00164e-06	Up-regulated
CSNK1G1	Pig	2.75618e-11	0.716204	618	369	1.00725e-06	Up-regulated
ENSSSCG00000046452	Pig	2.85178e-11	2.69813	102	17	1.04218e-06	Up-regulated
MIF	Pig	2.85733e-11	0.87044	303	129	1.04421e-06	Up-regulated
MRC1	Pig	2.90026e-11	2.62165	83	0.01	1.0599e-06	Up-regulated
ENSSSCG00000013391	Pig	2.93875e-11	1.55264	205	68	1.07397e-06	Up-regulated
RNF19B	Pig	3.00444e-11	2.40371	173	51	1.09797e-06	Up-regulated
RPS18	Pig	3.17793e-11	0.877076	268	101	1.16137e-06	Up-regulated
FAM13A	Pig	3.18351e-11	1.09186	516	312	1.16341e-06	Up-regulated
CCNL1	Pig	3.18397e-11	0.867081	602	373	1.16358e-06	Up-regulated
KLHL5	Pig	3.20026e-11	0.761578	547	317	1.16954e-06	Up-regulated
ATP10D	Pig	3.29559e-11	0.791988	0.52	0.29	1.20437e-06	Up-regulated
RPS12	Pig	3.42547e-11	0.942936	319	137	1.25184e-06	Up-regulated
EHD4	Pig	3.67019e-11	0.853204	0.48	0.26	1.34127e-06	Up-regulated
SERPINB9	Pig	4.05139e-11	1.474	161	44	1.48058e-06	Up-regulated
ZNF326	Pig	4.05351e-11	0.832936	516	303	1.48136e-06	Up-regulated
KIF12	Pig	4.11224e-11	7.03497	43	0	1.50282e-06	Up-regulated
DOCK5	Pig	4.11224e-11	6.68992	43	0	1.50282e-06	Up-regulated
P379-gp07	pCMV	4.11224e-11	7.4656	43	0	1.50282e-06	Up-regulated
P379-gp12	pCMV	4.11224e-11	8.06873	43	0	1.50282e-06	Up-regulated
P379-gp16	pCMV	4.11224e-11	7.18509	43	0	1.50282e-06	Up-regulated
P379-gp30	pCMV	4.11224e-11	7.84977	43	0	1.50282e-06	Up-regulated
P379-gp43	pCMV	4.11224e-11	9.35859	43	0	1.50282e-06	Up-regulated
ASB13	Pig	4.12982e-11	1.68985	154	0.04	1.50924e-06	Up-regulated
CTSH	Pig	4.14115e-11	2.52014	106	19	1.51338e-06	Up-regulated
CD81	Pig	4.1636e-11	0.928502	504	293	1.52159e-06	Up-regulated
ENSSSCG00000034448	Pig	4.38912e-11	0.930377	339	146	1.604e-06	Up-regulated
ENSSSCG00000012566	Pig	4.4154e-11	2.08331	161	45	1.61361e-06	Up-regulated
CSTF3	Pig	4.69212e-11	1.1034	402	203	1.71474e-06	Up-regulated
TMCO1	Pig	4.70135e-11	1.31734	291	124	1.71811e-06	Up-regulated
BCL2L1	Pig	5.0249e-11	0.655743	547	315	1.83635e-06	Up-regulated
TACC2	Pig	5.38226e-11	1.58576	264	109	1.96695e-06	Up-regulated
SFR1	Pig	5.65298e-11	3.44213	75	8	2.06588e-06	Up-regulated
USP10	Pig	5.76026e-11	1.08144	343	159	2.10509e-06	Up-regulated
GPHN	Pig	5.95972e-11	0.528334	776	544	2.17798e-06	Up-regulated
RANGAP1	Pig	6.24278e-11	1.83013	98	16	2.28143e-06	Up-regulated
NDUFAB1	Pig	6.34888e-11	2.2062	98	16	2.3202e-06	Up-regulated
GCNT3	Pig	6.56799e-11	2.65072	87	12	2.40027e-06	Up-regulated
ENSSSCG00000033649	Pig	6.6475e-11	1.89187	181	57	2.42933e-06	Up-regulated
ECM1	Pig	6.89495e-11	0.934167	465	256	2.51976e-06	Up-regulated
UBAP1	Pig	6.98583e-11	1.10171	0.35	165	2.55297e-06	Up-regulated
ZNF248	Pig	7.42683e-11	1.50563	209	71	2.71414e-06	Up-regulated
NCOA3	Pig	8.42727e-11	0.557538	0.89	789	3.07975e-06	Up-regulated
TREX1	Pig	8.5212e-11	6.04523	47	1	3.11407e-06	Up-regulated
CD47	Human	8.71111e-11	5.75588	47	1	3.18348e-06	Up-regulated
MAPK14	Pig	9.23275e-11	1.00028	398	0.2	3.37411e-06	Up-regulated
ENSSSCG00000051054	Pig	9.36935e-11	2.1357	193	65	3.42403e-06	Up-regulated
ENSSSCG00000037274	Pig	9.65269e-11	0.514303	622	372	3.52757e-06	Up-regulated
RPAP3	Pig	9.75218e-11	1.28551	232	85	3.56394e-06	Up-regulated
WDR43	Pig	9.75869e-11	1.18777	346	165	3.56631e-06	Up-regulated
WASHC4	Pig	9.77149e-11	0.654198	634	389	3.57099e-06	Up-regulated
SSR4	Pig	1.00831e-10	1.49584	177	53	3.68487e-06	Up-regulated
MSANTD3-TMEFF1	Pig	1.02266e-10	3.25916	91	14	3.73731e-06	Up-regulated
GHR	Pig	1.05785e-10	1.00995	634	457	3.8659e-06	Up-regulated
MRPS27	Pig	1.08004e-10	1.28156	358	174	3.94701e-06	Up-regulated
HNRNPDL	Pig	1.10604e-10	0.600804	693	453	4.04204e-06	Up-regulated
ENSSSCG00000028345	Pig	1.22468e-10	1.43161	0.22	79	4.47561e-06	Up-regulated
MRPL41	Pig	1.23974e-10	2.61533	98	17	4.53062e-06	Up-regulated
ZNF274	Pig	1.29756e-10	1.62127	205	69	4.74192e-06	Up-regulated
ENSSSCG00000012961	Pig	1.30195e-10	1.77253	146	38	4.75796e-06	Up-regulated
ATRNL1	Pig	1.30628e-10	4.53533	63	5	4.77382e-06	Up-regulated
LIPC	Pig	1.31712e-10	0.878151	331	151	4.8134e-06	Up-regulated
ENSSSCG00000032067	Pig	1.40749e-10	2.02233	122	27	5.14368e-06	Up-regulated
ENSSSCG00000017913	Pig	1.47234e-10	2.25128	98	17	5.38065e-06	Up-regulated
ENSSSCG00000036274	Pig	1.48829e-10	3.89336	59	4	5.43896e-06	Up-regulated
WDR12	Pig	1.52382e-10	1.50678	134	32	5.56879e-06	Up-regulated
CMTM2	Pig	1.53387e-10	4.22455	55	3	5.60552e-06	Up-regulated
HSP90AA1	Pig	1.53716e-10	0.74634	531	317	5.61755e-06	Up-regulated
RPS17	Pig	1.57185e-10	1.36262	0.15	0.04	5.74431e-06	Up-regulated
OAZ1	Pig	1.62245e-10	1.47854	201	68	5.92924e-06	Up-regulated
SPCS3	Pig	1.66107e-10	1.66425	173	52	6.07039e-06	Up-regulated
WARS1	Pig	1.67993e-10	2.19762	138	35	6.13932e-06	Up-regulated
ITM2B	Pig	1.76169e-10	0.712153	492	275	6.43811e-06	Up-regulated
RPL23	Pig	1.83602e-10	0.883707	374	181	6.70973e-06	Up-regulated
ENSSSCG00000029830	Pig	1.85699e-10	0.732897	394	198	6.78638e-06	Up-regulated
NFAT5	Pig	1.87691e-10	0.653121	654	407	6.85917e-06	Up-regulated
ABL1	Pig	1.93473e-10	1.22665	299	131	7.07048e-06	Up-regulated
PDE4D	Pig	2.01844e-10	0.515083	846	597	7.37641e-06	Up-regulated
FAM111A	Pig	2.09113e-10	1.34785	224	83	7.64202e-06	Up-regulated
CEP44	Pig	2.15616e-10	2.02851	146	39	7.87968e-06	Up-regulated
RPS2	Pig	2.23008e-10	1.2762	248	98	8.14984e-06	Up-regulated
SQSTM1	Pig	2.25974e-10	1.2635	0.28	118	8.2582e-06	Up-regulated
TTC14	Pig	2.26602e-10	0.756575	559	338	8.28117e-06	Up-regulated
CALR	Pig	2.27009e-10	1.0899	256	103	8.29604e-06	Up-regulated
USP24	Pig	2.4785e-10	0.881392	512	303	9.05767e-06	Up-regulated
ZNF662	Pig	2.49643e-10	2.42115	87	13	9.12322e-06	Up-regulated
SERPINB6	Pig	2.50611e-10	2.02438	118	26	9.15856e-06	Up-regulated
SNRPN	Pig	2.57681e-10	1.93327	146	39	9.41696e-06	Up-regulated
ENSSSCG00000017509	Pig	2.63965e-10	0.698577	362	174	9.64659e-06	Up-regulated
TRMT112	Pig	2.70246e-10	1.79688	87	13	9.87613e-06	Up-regulated
EIF1	Pig	2.70541e-10	0.755122	362	174	9.88691e-06	Up-regulated
SNRPC	Pig	2.7457e-10	2.00443	118	26	1.00341e-05	Up-regulated
CPT1A	Pig	2.79031e-10	1.16082	217	77	1.01972e-05	Up-regulated
RPS6	Pig	2.85042e-10	1.39403	181	57	1.04169e-05	Up-regulated
ENSSSCG00000005424	Pig	2.85069e-10	1.79939	161	48	1.04178e-05	Up-regulated
TOR3A	Pig	2.87959e-10	2.64825	106	21	1.05235e-05	Up-regulated
TADA2A	Pig	2.90436e-10	1.22082	256	103	1.0614e-05	Up-regulated
HSD17B12	Pig	2.94428e-10	0.83585	398	203	1.07599e-05	Up-regulated
CHORDC1	Pig	2.97417e-10	0.848206	421	216	1.08691e-05	Up-regulated
ENSSSCG00000004729	Pig	2.979e-10	2.16908	106	21	1.08867e-05	Up-regulated
RNMT	Pig	3.0649e-10	0.918925	272	0.11	1.12007e-05	Up-regulated
SLC16A12	Pig	3.16948e-10	6.81448	39	0	1.15829e-05	Up-regulated
LRP1B	Pig	3.16948e-10	7.63184	39	0	1.15829e-05	Up-regulated
IL6	Pig	3.16948e-10	7.45083	39	0	1.15829e-05	Up-regulated
ENSSSCG00000032661	Pig	3.16948e-10	6.71459	39	0	1.15829e-05	Up-regulated
P379-gp05	pCMV	3.16948e-10	8.6412	39	0	1.15829e-05	Up-regulated
P379-gp08	pCMV	3.16948e-10	7.49176	39	0	1.15829e-05	Up-regulated
P379-gp64	pCMV	3.16948e-10	7.20674	39	0	1.15829e-05	Up-regulated
P379-gp74	pCMV	3.16948e-10	8.02786	39	0	1.15829e-05	Up-regulated
P379-gp76	pCMV	3.16948e-10	6.77976	39	0	1.15829e-05	Up-regulated
FAR2	Pig	3.23994e-10	3.82667	71	8	1.18403e-05	Up-regulated
1,00 STN	Pig	3.28442e-10	1.68238	197	68	1.20029e-05	Up-regulated
IP6K1	Pig	3.28867e-10	0.837134	398	202	1.20184e-05	Up-regulated
USP30	Pig	3.31045e-10	1.23957	213	75	1.2098e-05	Up-regulated
KLHL8	Pig	3.34454e-10	1.17741	205	72	1.22226e-05	Up-regulated
SUCLG2	Pig	3.38551e-10	0.605304	622	381	1.23723e-05	Up-regulated
MTIF2	Pig	3.4008e-10	1.16111	276	114	1.24282e-05	Up-regulated
ZNF239	Pig	3.40704e-10	2.6564	83	12	1.2451e-05	Up-regulated
GSTO1	Pig	3.42594e-10	3.06263	91	15	1.25201e-05	Up-regulated
ENSSSCG00000017165	Pig	3.49096e-10	1.19276	224	82	1.27577e-05	Up-regulated
ENSSSCG00000012006	Pig	3.55628e-10	0.668395	622	0.38	1.29964e-05	Up-regulated
SLC9A9	Pig	3.67837e-10	1.61224	177	56	1.34426e-05	Up-regulated
RPLP1	Pig	3.76249e-10	0.532659	551	325	1.375e-05	Up-regulated
SPCS1	Pig	3.87955e-10	1.95295	134	34	1.41778e-05	Up-regulated
ABCA4	Pig	3.99321e-10	2.18675	106	21	1.45932e-05	Up-regulated
CDK15	Pig	4.24321e-10	2.3915	91	15	1.55068e-05	Up-regulated
TMEM204	Pig	4.56348e-10	1.18188	315	151	1.66772e-05	Up-regulated
SETDB2	Pig	4.96175e-10	1.46233	173	54	1.81327e-05	Up-regulated
PPIP5K2	Pig	5.07365e-10	1.33791	0.24	97	1.85417e-05	Up-regulated
TMED5	Pig	5.17406e-10	1.1494	0.26	108	1.89086e-05	Up-regulated
ABCA5	Pig	5.18304e-10	1.95305	169	54	1.89414e-05	Up-regulated
SIAE	Pig	5.35578e-10	1.91292	102	0.02	1.95727e-05	Up-regulated
ORC3	Pig	5.45002e-10	1.06932	0.28	118	1.99171e-05	Up-regulated
CMSS1	Pig	5.51367e-10	1.07891	0.39	0.2	2.01497e-05	Up-regulated
ASB4	Pig	5.64378e-10	4.7291	63	6	2.06252e-05	Up-regulated
SNRNP70	Pig	5.87086e-10	0.528374	689	456	2.1455e-05	Up-regulated
IGF2BP3	Pig	6.18857e-10	4.23314	63	6	2.26161e-05	Up-regulated
MLXIP	Pig	6.20074e-10	0.63128	559	0.33	2.26606e-05	Up-regulated
FTL	Pig	6.20198e-10	1.07354	0.22	82	2.26651e-05	Up-regulated
CYP20A1	Pig	6.20811e-10	0.588358	744	507	2.26876e-05	Up-regulated
CD80	Pig	6.50024e-10	3.91245	75	0.01	2.37551e-05	Up-regulated
ENSSSCG00000026864	Pig	6.72727e-10	4.7152	43	1	2.45848e-05	Up-regulated
SNRPD1	Pig	6.76323e-10	1.92834	94	17	2.47162e-05	Up-regulated
GPAT4	Pig	6.92273e-10	1.76984	193	68	2.52991e-05	Up-regulated
GPX3	Pig	7.0225e-10	2.73655	79	11	2.56637e-05	Up-regulated
MRAS	Pig	7.03761e-10	2.25908	118	27	2.57189e-05	Up-regulated
RGCC	Pig	7.47209e-10	0.510895	724	0.52	2.73068e-05	Up-regulated
ZNF346	Pig	7.78563e-10	2.45917	87	14	2.84526e-05	Up-regulated
HP1BP3	Pig	7.86539e-10	0.825897	382	192	2.87441e-05	Up-regulated
GPM6A	Pig	7.89303e-10	4.56956	59	5	2.88451e-05	Up-regulated
TOMM20	Pig	8.05447e-10	1.89988	154	45	2.94351e-05	Up-regulated
ENSSSCG00000016737	Pig	8.12715e-10	0.736004	311	0.14	2.97007e-05	Up-regulated
PELP1	Pig	8.26749e-10	1.89372	0.13	33	3.02136e-05	Up-regulated
ENSSSCG00000010525	Pig	8.27917e-10	1.51065	173	56	3.02562e-05	Up-regulated
ENSSSCG00000016226	Pig	8.36623e-10	1.16046	224	84	3.05744e-05	Up-regulated
HEATR5B	Pig	8.37876e-10	1.09628	299	135	3.06202e-05	Up-regulated
RBM39	Pig	8.47127e-10	0.635382	0.65	432	3.09583e-05	Up-regulated
RBM26	Pig	8.84187e-10	0.797641	547	335	3.23126e-05	Up-regulated
AP4E1	Pig	8.92816e-10	1.36153	244	0.1	3.2628e-05	Up-regulated
ENSSSCG00000017920	Pig	9.45059e-10	3.054	59	5	3.45372e-05	Up-regulated
JADE2	Pig	9.4759e-10	1.58058	134	35	3.46297e-05	Up-regulated
USP15	Pig	9.85896e-10	0.638249	724	531	3.60296e-05	Up-regulated
CYP2S1	Pig	1.00694e-09	4.94939	51	3	3.67986e-05	Up-regulated
HIRA	Pig	1.00756e-09	1.27775	236	94	3.68212e-05	Up-regulated
RPLP2	Pig	1.02475e-09	0.920468	307	138	3.74494e-05	Up-regulated
MYC	Pig	1.08524e-09	2.41698	94	18	3.96601e-05	Up-regulated
RBMS2	Pig	1.09939e-09	0.629984	516	312	4.01772e-05	Up-regulated
ZNF654	Pig	1.09984e-09	0.756455	579	355	4.01935e-05	Up-regulated
MTFR2	Pig	1.10265e-09	1.21439	283	126	4.02963e-05	Up-regulated
PLIN5	Pig	1.11982e-09	3.7701	51	3	4.09238e-05	Up-regulated
GALK2	Pig	1.12247e-09	0.698074	445	236	4.10206e-05	Up-regulated
DAZAP1	Pig	1.12525e-09	1.11034	268	112	4.11221e-05	Up-regulated
ELF1	Pig	1.13351e-09	0.511121	657	419	4.14242e-05	Up-regulated
TOMM70	Pig	1.20286e-09	1.23781	213	79	4.39586e-05	Up-regulated
ENSSSCG00000005656	Pig	1.23597e-09	1.09254	193	67	4.51686e-05	Up-regulated
DDX20	Pig	1.24509e-09	1.96686	0.15	44	4.55019e-05	Up-regulated
CADPS2	Pig	1.25182e-09	0.507766	571	357	4.57478e-05	Up-regulated
LRRC28	Pig	1.29799e-09	0.675282	559	343	4.7435e-05	Up-regulated
STAP1	Pig	1.30276e-09	1.23685	177	58	4.76095e-05	Up-regulated
ENSSSCG00000013436	Pig	1.30531e-09	3.18383	71	9	4.77027e-05	Up-regulated
PPP1R3C	Pig	1.30572e-09	3.2483	87	15	4.77174e-05	Up-regulated
PSMD7	Pig	1.31582e-09	0.9818	209	75	4.80865e-05	Up-regulated
RPL38	Pig	1.3187e-09	0.930754	264	0.11	4.8192e-05	Up-regulated
PPIG	Pig	1.40158e-09	1.11292	335	165	5.12208e-05	Up-regulated
PPA1	Pig	1.44971e-09	0.776975	303	136	5.29797e-05	Up-regulated
GM2A	Pig	1.47882e-09	2.63591	71	9	5.40436e-05	Up-regulated
ABL2	Pig	1.5305e-09	0.900853	437	244	5.5932e-05	Up-regulated
DNAJC2	Pig	1.5404e-09	1.39111	169	54	5.62939e-05	Up-regulated
WDR26	Pig	1.57295e-09	0.79968	354	171	5.74835e-05	Up-regulated
HSPA9	Pig	1.58015e-09	1.79945	161	51	5.77467e-05	Up-regulated
SS18L2	Pig	1.63035e-09	2.65471	87	15	5.95811e-05	Up-regulated
RND3	Pig	1.63987e-09	1.85945	169	56	5.99291e-05	Up-regulated
ENSSSCG00000032129	Pig	1.6482e-09	2.23839	122	31	6.02336e-05	Up-regulated
GALNT11	Pig	1.70782e-09	1.1781	232	91	6.24125e-05	Up-regulated
ENSSSCG00000038260	Pig	1.73568e-09	1.65391	142	0.04	6.34306e-05	Up-regulated
RNLS	Pig	1.7439e-09	2.10611	0.11	25	6.37308e-05	Up-regulated
LUC7L3	Pig	1.75441e-09	0.590876	669	446	6.41151e-05	Up-regulated
C19orf53	Pig	1.7877e-09	1.92537	106	23	6.53317e-05	Up-regulated
TMEM260	Pig	1.79871e-09	0.848187	287	127	6.57337e-05	Up-regulated
BAG1	Pig	1.84257e-09	2.03667	0.11	25	6.73367e-05	Up-regulated
PSMD12	Pig	1.88434e-09	1.20837	307	145	6.88631e-05	Up-regulated
WDR35	Pig	1.9241e-09	2.63237	79	12	7.03161e-05	Up-regulated
NME2	Pig	1.96713e-09	0.965776	244	0.1	7.18889e-05	Up-regulated
LRFN5	Pig	2.00436e-09	1.27134	146	42	7.32492e-05	Up-regulated
PSMA5	Pig	2.00525e-09	1.58179	201	74	7.32819e-05	Up-regulated
SCN8A	Pig	2.08183e-09	2.50999	79	12	7.60803e-05	Up-regulated
ENSSSCG00000020808	Pig	2.10454e-09	1.25879	169	55	7.69103e-05	Up-regulated
TNRC6C	Pig	2.12888e-09	0.794645	425	228	7.77999e-05	Up-regulated
PEF1	Pig	2.26707e-09	2.14945	118	29	8.28501e-05	Up-regulated
METTL15	Pig	2.2773e-09	1.3049	299	142	8.32241e-05	Up-regulated
KLHDC1	Pig	2.29757e-09	1.15388	0.26	0.11	8.39647e-05	Up-regulated
USP14	Pig	2.34096e-09	1.03013	276	121	8.55505e-05	Up-regulated
GART	Pig	2.37578e-09	2.01504	114	27	8.68229e-05	Up-regulated
WASHC3	Pig	2.38157e-09	0.886854	417	228	8.70343e-05	Up-regulated
ENSSSCG00000001696	Pig	2.39127e-09	1.43628	138	38	8.7389e-05	Up-regulated
GAPDH	Pig	2.40753e-09	0.732129	496	284	8.79832e-05	Up-regulated
MEIS2	Pig	2.44629e-09	8.45366	35	0	8.93997e-05	Up-regulated
DOCK3	Pig	2.44629e-09	7.13489	35	0	8.93997e-05	Up-regulated
ENSSSCG00000023041	Pig	2.44629e-09	7.08939	35	0	8.93997e-05	Up-regulated
SLCO5A1	Pig	2.44629e-09	6.52799	35	0	8.93997e-05	Up-regulated
COQ8A	Pig	2.44629e-09	6.74559	35	0	8.93997e-05	Up-regulated
P379-gp01	pCMV	2.44629e-09	7.31666	35	0	8.93997e-05	Up-regulated
P379-gp63	pCMV	2.44629e-09	7.0455	35	0	8.93997e-05	Up-regulated
P379-gp80	pCMV	2.44629e-09	8.4439	35	0	8.93997e-05	Up-regulated
SOD2	Pig	2.62058e-09	2.68216	106	24	9.57691e-05	Up-regulated
METTL8	Pig	2.62862e-09	1.76008	138	39	9.60631e-05	Up-regulated
ATP5PF	Pig	2.63107e-09	1.72102	0.15	45	9.61523e-05	Up-regulated
PLD1	Pig	2.88066e-09	1.86528	142	41	0.000105274	Up-regulated
3,00 ARL	Pig	3.13264e-09	1.83394	98	0.02	0.000114482	Up-regulated
CTSV	Pig	3.15427e-09	1.88877	126	33	0.000115273	Up-regulated
NR1D2	Pig	3.23858e-09	1.08847	197	71	0.000118354	Up-regulated
RPL27	Pig	3.26306e-09	1.3029	217	84	0.000119249	Up-regulated
UBA7	Pig	3.26904e-09	2.74851	63	7	0.000119467	Up-regulated
ATP5MG	Pig	3.37736e-09	1.69781	0.13	35	0.000123426	Up-regulated
SLC38A2	Pig	3.38203e-09	0.517687	0.63	411	0.000123596	Up-regulated
EFNB1	Pig	3.44503e-09	1.40916	142	41	0.000125899	Up-regulated
CRYBG1	Pig	3.44958e-09	1.10724	205	77	0.000126065	Up-regulated
CCT3	Pig	3.48795e-09	1.41639	169	56	0.000127467	Up-regulated
WDFY1	Pig	3.56897e-09	0.666848	461	264	0.000130428	Up-regulated
RECK	Pig	3.57849e-09	1.19388	217	83	0.000130776	Up-regulated
SNRNP200	Pig	3.64819e-09	1.43142	181	62	0.000133323	Up-regulated
TP53INP1	Pig	3.65566e-09	1.1195	232	94	0.000133596	Up-regulated
FAM234B	Pig	3.80485e-09	1.96123	106	24	0.000139048	Up-regulated
YAF2	Pig	4.19607e-09	0.542775	587	0.36	0.000153345	Up-regulated
FILIP1L	Pig	4.22957e-09	0.627268	535	327	0.00015457	Up-regulated
TUBE1	Pig	4.29109e-09	2.25838	0.11	26	0.000156818	Up-regulated
SLC39A1	Pig	4.3814e-09	1.86056	83	14	0.000160118	Up-regulated
CLUH	Pig	4.41427e-09	2.98558	79	13	0.00016132	Up-regulated
DDX11	Pig	4.5963e-09	3.04548	71	0.01	0.000167972	Up-regulated
TMEM245	Pig	4.6125e-09	1.27012	291	0.14	0.000168564	Up-regulated
SERTAD1	Pig	4.64053e-09	1.59442	114	28	0.000169588	Up-regulated
OSTC	Pig	4.68641e-09	2.45319	87	16	0.000171265	Up-regulated
ENSSSCG00000043259	Pig	4.79215e-09	2.14236	122	32	0.000175129	Up-regulated
ENSSSCG00000017164	Pig	4.82153e-09	6.46988	39	1	0.000176203	Up-regulated
PIP5K1B	Pig	4.85653e-09	5.09501	39	1	0.000177482	Up-regulated
AKAP6	Pig	4.85653e-09	6.23362	39	1	0.000177482	Up-regulated
EPHX1	Pig	4.89178e-09	5.81269	39	1	0.00017877	Up-regulated
IFI35	Pig	4.967e-09	1.50315	114	28	0.000181519	Up-regulated
ENSSSCG00000009146	Pig	5.00049e-09	0.818015	295	134	0.000182743	Up-regulated
ERCC6	Pig	5.07e-09	1.28937	189	67	0.000185283	Up-regulated
SYPL2	Pig	5.13513e-09	2.41143	59	6	0.000187663	Up-regulated
PIP4P1	Pig	5.30011e-09	3.64947	55	5	0.000193692	Up-regulated
SYK	Pig	5.44803e-09	3.42311	55	5	0.000199098	Up-regulated
XIAP	Pig	5.50197e-09	0.748018	524	325	0.00020107	Up-regulated
GPR155	Pig	5.76095e-09	2.48308	106	25	0.000210534	Up-regulated
VARS1	Pig	5.83865e-09	2.33436	87	16	0.000213374	Up-regulated
CCDC66	Pig	5.92925e-09	1.21444	236	98	0.000216685	Up-regulated
CC2D2A	Pig	6.10865e-09	1.71251	0.13	36	0.000223241	Up-regulated
RPL37	Pig	6.19484e-09	0.710375	374	0.19	0.00022639	Up-regulated
METTL16	Pig	6.27981e-09	1.29336	193	71	0.000229496	Up-regulated
FNIP1	Pig	6.30654e-09	0.749634	547	342	0.000230473	Up-regulated
NARS2	Pig	6.41036e-09	0.93958	0.24	98	0.000234267	Up-regulated
BRIX1	Pig	6.51394e-09	1.23161	0.15	46	0.000238052	Up-regulated
RALGPS2	Pig	6.66309e-09	5.0703	43	2	0.000243503	Up-regulated
MRPS5	Pig	6.69208e-09	1.23155	193	71	0.000244562	Up-regulated
DUSP1	Pig	6.87319e-09	0.734742	583	387	0.000251181	Up-regulated
BATF2	Pig	6.93213e-09	4.29777	43	2	0.000253335	Up-regulated
CD63	Pig	6.94213e-09	1.02221	303	145	0.0002537	Up-regulated
ZNF782	Pig	6.97879e-09	2.01041	102	23	0.00025504	Up-regulated
PSMB4	Pig	7.04334e-09	1.39761	169	57	0.000257399	Up-regulated
CEP295	Pig	7.08729e-09	0.800457	366	188	0.000259005	Up-regulated
EIF4E3	Pig	7.20597e-09	0.821802	299	0.14	0.000263342	Up-regulated
MAGT1	Pig	7.22433e-09	0.933868	366	193	0.000264013	Up-regulated
ENSSSCG00000041465	Pig	7.47146e-09	1.90699	126	35	0.000273044	Up-regulated
KPNA7	Pig	7.96078e-09	2.13405	0.11	27	0.000290927	Up-regulated
SESN2	Pig	7.98976e-09	2.91455	67	9	0.000291986	Up-regulated
MDN1	Pig	8.01571e-09	1.14131	228	94	0.000292934	Up-regulated
TFDP2	Pig	8.22698e-09	0.852551	0.35	175	0.000300655	Up-regulated
LACTB	Pig	8.33741e-09	1.71702	0.13	37	0.000304691	Up-regulated
RNF220	Pig	8.67654e-09	0.50408	606	394	0.000317084	Up-regulated
ENSSSCG00000043835	Pig	8.67964e-09	1.36631	236	102	0.000317198	Up-regulated
SCARB2	Pig	8.68545e-09	0.850372	343	174	0.00031741	Up-regulated
SLC6A6	Pig	8.70861e-09	2.55979	94	0.02	0.000318256	Up-regulated
ENSSSCG00000000148	Pig	8.81449e-09	1.75911	102	23	0.000322125	Up-regulated
SELENOT	Pig	8.87877e-09	1.15765	248	106	0.000324475	Up-regulated
HNRNPK-AS1	Human	8.92877e-09	1.26916	201	77	0.000326302	Up-regulated
DIPK2A	Pig	8.96423e-09	1.17361	154	49	0.000327598	Up-regulated
PUM3	Pig	8.99099e-09	0.904987	0.28	128	0.000328576	Up-regulated
CAPZA1	Pig	9.14847e-09	0.630685	0.48	281	0.000334331	Up-regulated
SOD1	Pig	9.26083e-09	2.12408	118	31	0.000338437	Up-regulated
LYPLAL1	Pig	9.56424e-09	1.54491	154	49	0.000349525	Up-regulated
ZSCAN12	Pig	1.01041e-08	1.68214	91	18	0.000369253	Up-regulated
ENSSSCG00000022058	Pig	1.01114e-08	2.30541	94	0.02	0.00036952	Up-regulated
LYST	Pig	1.03353e-08	0.671469	638	448	0.000377704	Up-regulated
HTATIP2	Pig	1.05255e-08	2.69923	87	17	0.000384654	Up-regulated
C6orf62	Pig	1.06938e-08	1.07373	291	136	0.000390803	Up-regulated
CHD1L	Pig	1.07342e-08	0.85134	449	264	0.000392282	Up-regulated
ERBB3	Pig	1.10377e-08	1.1161	181	64	0.000403371	Up-regulated
TRIQK	Pig	1.13105e-08	1.103	177	62	0.000413343	Up-regulated
CANX	Pig	1.13837e-08	0.803806	429	249	0.000416016	Up-regulated
UPK1B	Pig	1.17952e-08	2.18224	87	17	0.000431055	Up-regulated
NR4A2	Pig	1.21922e-08	2.66877	63	8	0.000445564	Up-regulated
UGGT2	Pig	1.29188e-08	2.09698	118	32	0.000472119	Up-regulated
PI4K2B	Pig	1.31501e-08	1.19693	244	107	0.000480569	Up-regulated
ENSSSCG00000027270	Pig	1.31576e-08	2.04004	98	22	0.000480846	Up-regulated
COQ9	Pig	1.34144e-08	2.28953	87	17	0.000490229	Up-regulated
MKLN1	Pig	1.37909e-08	0.515215	803	633	0.000503988	Up-regulated
VMP1	Pig	1.41915e-08	0.579024	654	449	0.000518627	Up-regulated
STOML1	Pig	1.42044e-08	3.00954	71	11	0.0005191	Up-regulated
PHTF1	Pig	1.42765e-08	1.33761	165	57	0.000521733	Up-regulated
ADAM32	Pig	1.4804e-08	2.47415	71	11	0.000541013	Up-regulated
ZDHHC4	Pig	1.51952e-08	1.92948	102	24	0.000555308	Up-regulated
EIF3A	Pig	1.53258e-08	0.674411	374	194	0.000560083	Up-regulated
PTPN3	Pig	1.5529e-08	2.85311	71	11	0.000567509	Up-regulated
ORC5	Pig	1.62154e-08	0.738124	346	174	0.000592593	Up-regulated
TRIM44	Pig	1.62565e-08	0.704775	417	0.23	0.000594094	Up-regulated
NFIL3	Pig	1.6289e-08	1.56995	157	53	0.000595281	Up-regulated
NAA20	Pig	1.63761e-08	1.02877	276	127	0.000598463	Up-regulated
NABP1	Pig	1.66719e-08	1.89696	157	54	0.000609273	Up-regulated
GPR63	Pig	1.70725e-08	1.11407	142	43	0.000623916	Up-regulated
TLE1	Pig	1.73008e-08	0.879795	386	211	0.000632259	Up-regulated
SLC18B1	Pig	1.73881e-08	1.9577	91	19	0.000635447	Up-regulated
PHIP	Pig	1.76291e-08	0.742851	465	0.28	0.000644254	Up-regulated
EML1	Pig	1.76667e-08	0.752324	0.5	303	0.000645631	Up-regulated
DCAF6	Pig	1.85052e-08	0.514528	756	555	0.000676273	Up-regulated
RBM8A	Pig	1.87645e-08	1.62878	118	32	0.000685749	Up-regulated
PSMD11	Human	1.89273e-08	6.25273	31	0	0.0006917	Up-regulated
GREB1L	Pig	1.89273e-08	6.49488	31	0	0.0006917	Up-regulated
FBXW8	Pig	1.89273e-08	6.98205	31	0	0.0006917	Up-regulated
CORIN	Pig	1.89273e-08	6.20555	31	0	0.0006917	Up-regulated
TLCD4	Pig	1.89273e-08	6.27513	31	0	0.0006917	Up-regulated
GYG2	Pig	1.89273e-08	6.43687	31	0	0.0006917	Up-regulated
GSTA4	Pig	1.89273e-08	6.19539	31	0	0.0006917	Up-regulated
OLR1	Pig	1.89273e-08	6.71403	31	0	0.0006917	Up-regulated
DCN	Pig	1.89273e-08	7.76413	31	0	0.0006917	Up-regulated
ACSS3	Pig	1.89273e-08	7.18975	31	0	0.0006917	Up-regulated
ENSSSCG00000041571	Pig	1.89969e-08	1.08594	157	53	0.000694243	Up-regulated
OGFRL1	Pig	1.90519e-08	1.16677	165	56	0.000696252	Up-regulated
NOL7	Pig	1.91877e-08	1.50072	169	0.06	0.000701215	Up-regulated
ENSSSCG00000038829	Pig	1.97665e-08	1.73664	0.11	28	0.000722366	Up-regulated
LMAN2L	Pig	1.99842e-08	1.7012	157	54	0.000730323	Up-regulated
RPL6	Pig	2.07526e-08	0.896893	307	149	0.000758403	Up-regulated
CDV3	Pig	2.13448e-08	0.7655	406	219	0.000780046	Up-regulated
UBAP2L	Pig	2.16348e-08	0.790961	354	184	0.000790645	Up-regulated
PSMA7	Pig	2.17598e-08	0.844535	197	75	0.000795212	Up-regulated
MAT2B	Pig	2.21406e-08	0.916489	193	73	0.000809127	Up-regulated
BTF3	Pig	2.22723e-08	1.06285	213	86	0.00081394	Up-regulated
KIAA0825	Pig	2.28648e-08	0.708726	272	122	0.000835592	Up-regulated
TECTA	Pig	2.33767e-08	2.94191	75	13	0.0008543	Up-regulated
VCPIP1	Pig	2.35844e-08	1.03085	205	81	0.000861891	Up-regulated
ATM	Pig	2.4067e-08	0.657488	441	246	0.00087953	Up-regulated
THAP7	Pig	2.42562e-08	2.55951	67	0.01	0.000886442	Up-regulated
TPST1	Pig	2.47482e-08	1.30317	0.22	94	0.000904422	Up-regulated
KHNYN	Pig	2.50697e-08	1.40367	157	54	0.000916172	Up-regulated
OARD1	Pig	2.54711e-08	2.5889	75	13	0.000930841	Up-regulated
SELENOS	Pig	2.56221e-08	1.30726	161	56	0.000936361	Up-regulated
ATP6V1B2	Pig	2.56956e-08	1.90985	134	41	0.000939045	Up-regulated
RHEB	Pig	2.67669e-08	1.03904	287	138	0.000978196	Up-regulated
ENSSSCG00000021180	Pig	2.72251e-08	1.06622	0.11	28	0.00099494	Up-regulated
UBFD1	Pig	2.75333e-08	1.74022	134	41	0.00100621	Up-regulated
COX7C	Pig	2.80296e-08	1.41372	173	64	0.00102434	Up-regulated
CFL2	Pig	2.83186e-08	1.15458	146	46	0.0010349	Up-regulated
ZNF207	Pig	2.89996e-08	0.571332	496	294	0.00105979	Up-regulated
BROX	Pig	2.92338e-08	1.10381	224	94	0.00106835	Up-regulated
DEUP1	Pig	2.93202e-08	0.822067	134	0.04	0.00107151	Up-regulated
GADL1	Pig	2.96125e-08	2.26186	75	13	0.00108219	Up-regulated
NCOA4	Pig	3.00886e-08	2.02488	114	31	0.00109959	Up-regulated
PRMT2	Pig	3.04907e-08	0.570075	0.63	422	0.00111428	Up-regulated
FAM98A	Pig	3.11363e-08	1.3319	157	54	0.00113788	Up-regulated
PSMB7	Pig	3.16077e-08	0.830239	295	141	0.0011551	Up-regulated
DBI	Pig	3.17853e-08	1.73508	0.11	29	0.00116159	Up-regulated
ENSSSCG00000001396	Pig	3.18515e-08	1.45711	114	31	0.00116401	Up-regulated
UOX	Pig	3.25958e-08	0.977501	276	131	0.00119121	Up-regulated
TCTN1	Pig	3.27555e-08	3.76526	51	5	0.00119705	Up-regulated
RGS21	Pig	3.31091e-08	3.66062	51	5	0.00120997	Up-regulated
COIL	Pig	3.33606e-08	1.10216	272	131	0.00121916	Up-regulated
DNAJB6	Pig	3.6062e-08	1.16093	252	115	0.00131789	Up-regulated
EPM2AIP1	Pig	3.64272e-08	1.30791	161	56	0.00133123	Up-regulated
SRBD1	Pig	3.70596e-08	0.690883	394	211	0.00135434	Up-regulated
BCL2L12	Pig	3.70831e-08	5.34754	35	1	0.0013552	Up-regulated
ENSSSCG00000012061	Pig	3.80575e-08	2.79782	51	5	0.00139081	Up-regulated
PIN4	Pig	3.8341e-08	3.18432	63	9	0.00140117	Up-regulated
PSMA4	Pig	3.85228e-08	1.35795	161	57	0.00140782	Up-regulated
GSPT1	Pig	3.86956e-08	0.763407	319	157	0.00141413	Up-regulated
SSB	Pig	3.89463e-08	1.11368	217	91	0.00142329	Up-regulated
EFNA5	Pig	3.89863e-08	3.39874	35	1	0.00142475	Up-regulated
PLAA	Pig	4.05035e-08	0.901567	311	155	0.0014802	Up-regulated
ADCY8	Pig	4.05627e-08	4.84428	47	4	0.00148237	Up-regulated
ZNF891	Pig	4.0716e-08	1.54475	0.11	29	0.00148797	Up-regulated
SMARCA4	Pig	4.09704e-08	0.824364	248	0.11	0.00149726	Up-regulated
SNX6	Pig	4.18591e-08	0.961802	354	193	0.00152974	Up-regulated
ELOA	Pig	4.25879e-08	2.04738	91	0.02	0.00155638	Up-regulated
TTC39A	Pig	4.25891e-08	2.30649	79	15	0.00155642	Up-regulated
JKAMP	Pig	4.27235e-08	1.43934	165	0.06	0.00156133	Up-regulated
ENSSSCG00000044211	Pig	4.29205e-08	3.60156	47	4	0.00156853	Up-regulated
MSRB3	Pig	4.30076e-08	0.54039	626	417	0.00157171	Up-regulated
FADD	Pig	4.38142e-08	2.38615	71	12	0.00160119	Up-regulated
FBXO7	Pig	4.41321e-08	2.00383	122	36	0.00161281	Up-regulated
CETN3	Pig	4.43839e-08	1.55976	154	53	0.00162201	Up-regulated
TEP1	Pig	4.64715e-08	1.27824	185	71	0.0016983	Up-regulated
YLPM1	Pig	4.66289e-08	0.722365	295	143	0.00170405	Up-regulated
NOP56	Pig	4.67468e-08	1.37524	165	59	0.00170836	Up-regulated
RHBDF2	Pig	4.6882e-08	1.59044	79	15	0.0017133	Up-regulated
GNS	Pig	4.69294e-08	0.833866	248	109	0.00171503	Up-regulated
CHCHD6	Pig	4.70856e-08	1.48337	138	44	0.00172074	Up-regulated
MPV17L2	Pig	4.72318e-08	2.57704	63	9	0.00172608	Up-regulated
RBFOX1	Pig	4.73059e-08	4.56942	39	2	0.00172879	Up-regulated
PSMD2	Pig	4.80097e-08	1.26103	201	83	0.00175452	Up-regulated
ENSSSCG00000040571	Pig	4.80138e-08	1.92182	122	36	0.00175466	Up-regulated
C1RL	Pig	4.8869e-08	2.31775	83	17	0.00178592	Up-regulated
ENSSSCG00000012520	Pig	4.91341e-08	2.30124	47	4	0.00179561	Up-regulated
ENSSSCG00000034709	Pig	4.92481e-08	0.848792	0.24	105	0.00179977	Up-regulated
FAM162A	Pig	4.93108e-08	1.92413	114	32	0.00180206	Up-regulated
KIRREL1	Pig	4.94115e-08	2.54079	83	17	0.00180574	Up-regulated
ENSSSCG00000035460	Pig	4.95025e-08	4.31644	39	2	0.00180907	Up-regulated
PIM3	Pig	4.95286e-08	1.67255	94	22	0.00181002	Up-regulated
ETNK1	Pig	4.96028e-08	0.760944	335	177	0.00181274	Up-regulated
SPDYA	Pig	4.98243e-08	3.97553	39	2	0.00182083	Up-regulated
MRPS18C	Pig	4.99177e-08	1.9331	102	26	0.00182424	Up-regulated
MAP3K6	Pig	5.02194e-08	2.18423	71	12	0.00183527	Up-regulated
ENSSSCG00000034230	Pig	5.36351e-08	1.12242	209	87	0.0019601	Up-regulated
NOC3L	Pig	5.39333e-08	1.83416	122	36	0.00197099	Up-regulated
HERPUD1	Pig	5.47302e-08	0.698959	323	164	0.00200012	Up-regulated
DNAJC3	Pig	5.56683e-08	0.687608	362	195	0.0020344	Up-regulated
ENSSSCG00000051561	Pig	5.68101e-08	1.13694	83	17	0.00207612	Up-regulated
PCGF5	Pig	5.84161e-08	0.636749	543	349	0.00213482	Up-regulated
WFDC1	Pig	5.88655e-08	0.767672	398	234	0.00215124	Up-regulated
TRMT6	Pig	5.98165e-08	1.27803	0.24	109	0.002186	Up-regulated
CBFA2T2	Pig	6.09879e-08	0.883193	276	131	0.0022288	Up-regulated
SLC25A37	Pig	6.11284e-08	1.44021	157	55	0.00223394	Up-regulated
ENSSSCG00000013992	Pig	6.21451e-08	0.627302	406	225	0.00227109	Up-regulated
LAPTM4B	Pig	6.22844e-08	2.64406	98	25	0.00227618	Up-regulated
OSBPL1A	Pig	6.28434e-08	0.516811	657	441	0.00229661	Up-regulated
SERPING1	Pig	6.29374e-08	1.75183	83	17	0.00230005	Up-regulated
POLR2F	Pig	6.35948e-08	2.67427	75	14	0.00232407	Up-regulated
ENSSSCG00000011237	Pig	6.3978e-08	0.557972	654	446	0.00233807	Up-regulated
KCTD6	Pig	6.48319e-08	2.37698	87	19	0.00236928	Up-regulated
UGGT1	Pig	6.505e-08	0.551966	429	245	0.00237725	Up-regulated
UPP1	Pig	6.58084e-08	0.917896	205	83	0.00240497	Up-regulated
UTP18	Pig	6.80662e-08	1.64845	114	32	0.00248748	Up-regulated
SUPT6H	Pig	6.90929e-08	1.06948	177	67	0.002525	Up-regulated
DPY19L1	Pig	6.9328e-08	0.729918	0.48	299	0.00253359	Up-regulated
CCDC50	Pig	7.07258e-08	0.731006	402	222	0.00258467	Up-regulated
FNTA	Pig	7.08933e-08	1.08942	189	74	0.0025908	Up-regulated
PSMD3	Pig	7.14357e-08	1.79264	142	48	0.00261062	Up-regulated
RCC1L	Pig	7.49037e-08	1.3532	106	28	0.00273736	Up-regulated
VCL	Pig	7.75933e-08	0.618629	594	426	0.00283565	Up-regulated
FOCAD	Pig	7.81185e-08	0.885029	394	228	0.00285484	Up-regulated
KIAA0319L	Pig	7.8813e-08	0.686102	378	205	0.00288022	Up-regulated
TRMT11	Pig	7.93574e-08	0.94517	228	99	0.00290012	Up-regulated
MAML2	Human	8.10932e-08	1.09692	114	32	0.00296355	Up-regulated
KIAA0586	Pig	8.15383e-08	0.734486	244	108	0.00297982	Up-regulated
RPS8	Pig	8.21827e-08	0.604366	0.48	0.29	0.00300337	Up-regulated
PLK4	Pig	8.2488e-08	1.6808	146	0.05	0.00301453	Up-regulated
ENSSSCG00000016755	Pig	8.455e-08	1.41657	118	34	0.00308988	Up-regulated
SLA-DQB1	Pig	8.77078e-08	0.601317	307	153	0.00320528	Up-regulated
AP5M1	Pig	8.86769e-08	1.20739	0.24	113	0.0032407	Up-regulated
ZRANB2	Pig	9.06872e-08	0.524768	0.61	402	0.00331416	Up-regulated
SEC61A1	Pig	9.11316e-08	1.07821	213	0.09	0.00333041	Up-regulated
GLRX3	Pig	9.12916e-08	1.04826	232	103	0.00333625	Up-regulated
VAPB	Pig	9.17279e-08	0.651663	421	246	0.0033522	Up-regulated
SLC25A40	Pig	9.18479e-08	1.35358	169	65	0.00335658	Up-regulated
HMGA1	Pig	9.23508e-08	3.69998	55	7	0.00337496	Up-regulated
GABARAPL1	Pig	9.24679e-08	0.975371	339	189	0.00337924	Up-regulated
MTAP	Pig	9.36352e-08	0.707768	213	0.09	0.0034219	Up-regulated
ENSSSCG00000000207	Pig	9.53749e-08	1.20484	134	42	0.00348547	Up-regulated
YIPF1	Pig	9.62843e-08	1.466	146	0.05	0.00351871	Up-regulated
TCERG1	Pig	9.80901e-08	0.799016	386	214	0.0035847	Up-regulated
PPID	Pig	9.94343e-08	1.95603	106	29	0.00363383	Up-regulated
TSC22D3	Pig	9.99946e-08	0.755457	0.26	121	0.0036543	Up-regulated
HSBP1	Pig	1.00088e-07	1.01753	181	71	0.00365771	Up-regulated
SLC20A2	Pig	1.02426e-07	0.925841	366	208	0.00374315	Up-regulated
ABCE1	Pig	1.02691e-07	0.84354	335	176	0.00375284	Up-regulated
CREBRF	Pig	1.02799e-07	0.746945	331	174	0.00375681	Up-regulated
ENSSSCG00000031636	Pig	1.02842e-07	0.611686	469	277	0.00375836	Up-regulated
BCL7C	Pig	1.0333e-07	1.77599	102	27	0.00377621	Up-regulated
SLC25A29	Pig	1.0342e-07	1.17451	224	0.1	0.0037795	Up-regulated
SPECC1	Pig	1.04174e-07	2.91539	71	13	0.00380702	Up-regulated
C8orf37	Pig	1.06858e-07	2.01631	79	16	0.00390513	Up-regulated
B3GALNT1	Pig	1.06869e-07	1.82928	0.11	31	0.00390552	Up-regulated
SPATA5	Pig	1.10548e-07	0.623168	539	344	0.00403996	Up-regulated
TTC27	Pig	1.10752e-07	0.897142	213	0.09	0.00404743	Up-regulated
ENSSSCG00000007203	Pig	1.15763e-07	0.820517	386	218	0.00423054	Up-regulated
TSKU	Pig	1.15919e-07	1.30391	98	25	0.00423626	Up-regulated
FUBP1	Pig	1.18533e-07	0.846807	382	214	0.00433177	Up-regulated
NABP2	Pig	1.21366e-07	2.97387	63	0.01	0.00443531	Up-regulated
LIMCH1	Pig	1.23595e-07	0.570126	0.52	316	0.00451677	Up-regulated
LRP2BP	Pig	1.24735e-07	1.24772	173	67	0.00455845	Up-regulated
ERCC6L2	Pig	1.24848e-07	0.640315	0.35	0.19	0.00456256	Up-regulated
ACSL1	Pig	1.26556e-07	1.49686	142	48	0.00462497	Up-regulated
DAB2	Pig	1.29375e-07	1.14531	224	0.1	0.004728	Up-regulated
PNN	Pig	1.33187e-07	0.792472	394	235	0.0048673	Up-regulated
EIF4ENIF1	Pig	1.33304e-07	0.964218	248	113	0.0048716	Up-regulated
FAM149B1	Pig	1.34662e-07	1.0668	228	102	0.00492124	Up-regulated
PTPN2	Pig	1.349e-07	0.845167	252	118	0.00492991	Up-regulated
SYN3	Pig	1.3524e-07	0.783809	421	259	0.00494234	Up-regulated
NUDT14	Pig	1.35518e-07	1.73705	83	18	0.0049525	Up-regulated
RFC3	Pig	1.35549e-07	1.14571	154	54	0.00495366	Up-regulated
COPS5	Pig	1.35707e-07	1.73504	0.11	31	0.00495943	Up-regulated
ARRDC2	Pig	1.3581e-07	0.950601	244	115	0.00496317	Up-regulated
ANKS6	Pig	1.38646e-07	2.88224	63	0.01	0.00506682	Up-regulated
MFF	Pig	1.39404e-07	1.04734	213	0.09	0.00509453	Up-regulated
ENSSSCG00000007001	Pig	1.42308e-07	1.38464	71	13	0.00520064	Up-regulated
SINHCAF	Pig	1.43617e-07	0.753503	244	115	0.00524848	Up-regulated
C2CD5	Pig	1.44517e-07	1.11618	276	136	0.00528139	Up-regulated
ENSSSCG00000031091	Pig	1.46581e-07	2.34201	63	0.01	0.00535679	Up-regulated
ATP5F1B	Human	1.47013e-07	6.18303	28	0	0.00537258	Up-regulated
NRG2	Pig	1.47013e-07	6.17479	28	0	0.00537258	Up-regulated
RIC3	Pig	1.47013e-07	6.16541	28	0	0.00537258	Up-regulated
ITGB8	Pig	1.47013e-07	6.49403	28	0	0.00537258	Up-regulated
BAIAP2L1	Pig	1.47013e-07	6.17844	28	0	0.00537258	Up-regulated
DUSP2	Pig	1.47013e-07	6.59324	28	0	0.00537258	Up-regulated
NRXN3	Pig	1.47013e-07	6.07424	28	0	0.00537258	Up-regulated
P379-gp53	pCMV	1.47013e-07	6.96123	28	0	0.00537258	Up-regulated
CDC42EP5	Pig	1.49137e-07	1.31638	146	51	0.00545022	Up-regulated
SLC33A1	Pig	1.49941e-07	1.11365	177	69	0.0054796	Up-regulated
IBTK	Pig	1.5126e-07	0.973788	315	169	0.00552779	Up-regulated
THUMPD2	Pig	1.56614e-07	1.00509	244	112	0.00572345	Up-regulated
ACO2	Pig	1.57014e-07	2.19487	102	28	0.00573808	Up-regulated
SMIM7	Pig	1.57363e-07	1.21851	177	0.07	0.00575084	Up-regulated
OMD	Pig	1.57443e-07	1.59106	106	29	0.00575377	Up-regulated
USP8	Pig	1.57705e-07	0.667688	378	208	0.00576332	Up-regulated
PDCD5	Pig	1.57943e-07	1.61653	126	0.04	0.00577203	Up-regulated
LARS1	Pig	1.59154e-07	1.03331	323	175	0.0058163	Up-regulated
SYNE3	Pig	1.61228e-07	0.725412	287	144	0.00589208	Up-regulated
PIGN	Pig	1.6398e-07	0.749549	287	141	0.00599265	Up-regulated
ANKRD37	Pig	1.6452e-07	1.83907	134	45	0.00601239	Up-regulated
BMP2	Pig	1.70815e-07	1.7308	75	15	0.00624244	Up-regulated
C9orf85	Pig	1.72381e-07	1.0986	185	74	0.00629965	Up-regulated
CSGALNACT2	Pig	1.72588e-07	1.26195	146	0.05	0.00630722	Up-regulated
ENSSSCG00000014132	Pig	1.77971e-07	2.23163	75	15	0.00650395	Up-regulated
FAM76A	Pig	1.7861e-07	0.961061	319	169	0.00652731	Up-regulated
SNX9	Pig	1.7915e-07	0.541938	732	555	0.00654702	Up-regulated
ENSSSCG00000021236	Pig	1.7938e-07	1.64756	122	38	0.00655545	Up-regulated
TNFSF4	Pig	1.80977e-07	0.963104	268	129	0.00661382	Up-regulated
SCP2	Pig	1.82766e-07	0.959129	0.24	0.11	0.00667918	Up-regulated
CCNL1	Human	1.84169e-07	2.57165	79	17	0.00673047	Up-regulated
KLHL36	Pig	1.84332e-07	1.98396	91	22	0.00673642	Up-regulated
CTSD	Pig	1.8688e-07	1.47578	0.15	53	0.00682953	Up-regulated
PRKG1	Pig	1.88331e-07	4.38563	59	9	0.00688256	Up-regulated
XPR1	Pig	1.89651e-07	0.8243	441	0.27	0.00693078	Up-regulated
BCAR1	Pig	1.91986e-07	0.820391	189	77	0.00701613	Up-regulated
ENSSSCG00000007264	Pig	1.9253e-07	2.93357	59	9	0.007036	Up-regulated
YBEY	Pig	1.95092e-07	3.08041	59	9	0.00712964	Up-regulated
MIER2	Pig	2.0328e-07	1.38701	118	36	0.00742888	Up-regulated
CCNG1	Pig	2.03895e-07	3.57421	47	5	0.00745134	Up-regulated
SLC30A7	Pig	2.0519e-07	0.765743	449	271	0.00749866	Up-regulated
HNRNPA2B1	Pig	2.05854e-07	0.515711	0.63	425	0.00752292	Up-regulated
PDIA4	Pig	2.07532e-07	0.801129	154	55	0.00758427	Up-regulated
MRPL38	Pig	2.13547e-07	2.38687	67	12	0.00780408	Up-regulated
ENSSSCG00000016376	Pig	2.23767e-07	1.60291	102	28	0.00817757	Up-regulated
CCT8	Pig	2.2694e-07	1.29716	161	61	0.0082935	Up-regulated
C14orf119	Pig	2.27437e-07	2.89204	47	5	0.00831168	Up-regulated
PLA2G4A	Pig	2.31339e-07	3.67756	71	14	0.00845429	Up-regulated
ENSSSCG00000024660	Pig	2.36494e-07	1.13711	146	51	0.00864269	Up-regulated
DPY19L3	Pig	2.48828e-07	1.1211	185	76	0.00909342	Up-regulated
ENSSSCG00000050955	Pig	2.51682e-07	1.85607	134	46	0.00919773	Up-regulated
PNO1	Pig	2.522e-07	1.64419	102	28	0.00921665	Up-regulated
BZW2	Pig	2.55396e-07	1.16533	165	63	0.00933346	Up-regulated
RPS23	Pig	2.55925e-07	1.09993	185	76	0.00935279	Up-regulated
SLC9A8	Pig	2.57971e-07	0.812116	315	162	0.00942754	Up-regulated
ENSSSCG00000034610	Pig	2.58837e-07	2.03129	83	19	0.00945918	Up-regulated
GPR160	Pig	2.59839e-07	1.35969	0.11	32	0.00949581	Up-regulated
RPS16	Pig	2.61562e-07	0.807593	264	129	0.00955879	Up-regulated
ENSSSCG00000005663	Pig	2.6426e-07	3.79509	43	4	0.00965738	Up-regulated
LTO1	Pig	2.68005e-07	1.27311	134	45	0.00979423	Up-regulated
LARP1B	Pig	2.7162e-07	3.63064	43	4	0.00992634	Up-regulated
TMEM38B	Pig	2.71827e-07	1.43814	142	0.05	0.0099339	Up-regulated
1,00 TOP	Pig	2.73492e-07	0.502056	642	428	0.00999478	Up-regulated
TAF7	Pig	2.7426e-07	1.15768	185	76	0.0100228	Up-regulated
TNIK	Pig	2.76553e-07	6.11789	31	1	0.0101066	Up-regulated
ESYT3	Pig	2.78514e-07	5.5566	31	1	0.0101783	Up-regulated
PDE3A	Pig	2.80489e-07	6.34246	31	1	0.0102505	Up-regulated
ENSSSCG00000025674	Pig	2.81538e-07	1.17539	138	47	0.0102888	Up-regulated
ZNF397	Pig	2.82477e-07	4.99559	31	1	0.0103231	Up-regulated
HEPACAM2	Pig	2.86495e-07	4.68745	31	1	0.01047	Up-regulated
ENSSSCG00000033787	Pig	2.86634e-07	2.03421	63	11	0.010475	Up-regulated
ENSSSCG00000038182	Pig	2.90568e-07	3.96039	31	1	0.0106188	Up-regulated
RNF145	Pig	2.94289e-07	0.900607	276	137	0.0107548	Up-regulated
MTDH	Pig	2.97407e-07	0.502557	543	0.35	0.0108687	Up-regulated
PPM1E	Pig	2.97415e-07	3.44274	63	11	0.010869	Up-regulated
XYLT1	Pig	2.97816e-07	0.641441	441	276	0.0108837	Up-regulated
POLB	Pig	2.98343e-07	1.35729	142	0.05	0.0109029	Up-regulated
THSD4	Pig	3.01435e-07	1.517	43	4	0.0110159	Up-regulated
C12orf73	Pig	3.04706e-07	2.17613	91	23	0.0111355	Up-regulated
GNL3	Pig	3.08677e-07	1.65177	122	39	0.0112806	Up-regulated
CATSPER2	Pig	3.09813e-07	1.72371	83	19	0.0113221	Up-regulated
ENSSSCG00000031381	Pig	3.11082e-07	1.3413	122	39	0.0113685	Up-regulated
TMEM161B	Pig	3.15925e-07	0.754026	323	168	0.0115455	Up-regulated
ENSSSCG00000040118	Pig	3.16428e-07	1.32818	173	0.07	0.0115639	Up-regulated
MIER1	Human	3.17349e-07	4.70669	39	3	0.0115975	Up-regulated
NARS1	Pig	3.24177e-07	1.01319	0.22	99	0.0118471	Up-regulated
ATP11C	Pig	3.26182e-07	0.553282	508	314	0.0119203	Up-regulated
CHCHD10	Pig	3.32454e-07	4.44988	35	2	0.0121495	Up-regulated
SORBS3	Pig	3.327e-07	1.44575	122	39	0.0121585	Up-regulated
CYP2C42	Pig	3.32744e-07	1.79245	157	62	0.0121601	Up-regulated
EPC2	Pig	3.33324e-07	0.704703	394	225	0.0121813	Up-regulated
RHOBTB3	Pig	3.34574e-07	4.51673	35	2	0.012227	Up-regulated
MAPKAPK5	Pig	3.35622e-07	0.957483	236	111	0.0122653	Up-regulated
LMNA	Pig	3.35687e-07	0.849663	287	144	0.0122677	Up-regulated
LONRF3	Pig	3.38057e-07	2.85957	55	8	0.0123543	Up-regulated
MASP1	Pig	3.44454e-07	3.59255	39	3	0.0125881	Up-regulated
PRKAA2	Pig	3.45372e-07	4.35743	35	2	0.0126216	Up-regulated
PAPOLA	Human	3.50547e-07	3.01975	39	3	0.0128107	Up-regulated
SPOUT1	Pig	3.50547e-07	3.25344	39	3	0.0128107	Up-regulated
DACT3	Pig	3.56507e-07	3.42553	35	2	0.0130285	Up-regulated
NOTCH2	Pig	3.58775e-07	3.81245	35	2	0.0131114	Up-regulated
PSMD4	Pig	3.61474e-07	0.963574	185	76	0.0132101	Up-regulated
RCN2	Pig	3.62463e-07	1.42179	173	0.07	0.0132462	Up-regulated
ENSSSCG00000037399	Pig	3.63353e-07	3.56264	35	2	0.0132787	Up-regulated
MYNN	Pig	3.67241e-07	1.25023	189	0.08	0.0134208	Up-regulated
PRSS23	Pig	3.70012e-07	0.894933	311	166	0.0135221	Up-regulated
RORA	Pig	3.72831e-07	0.945243	374	225	0.0136251	Up-regulated
ENSSSCG00000035570	Pig	3.74961e-07	0.802418	276	137	0.0137029	Up-regulated
ATG12	Pig	3.82026e-07	1.33827	177	72	0.0139611	Up-regulated
CLMP	Pig	3.82103e-07	1.87956	122	0.04	0.013964	Up-regulated
ENSSSCG00000009419	Pig	3.83376e-07	1.56467	0.13	44	0.0140105	Up-regulated
CBL	Human	3.92195e-07	1.6296	55	8	0.0143328	Up-regulated
METTL5	Pig	3.92912e-07	1.2467	154	57	0.014359	Up-regulated
COX18	Pig	4.07284e-07	1.75447	134	47	0.0148842	Up-regulated
MFSD12	Pig	4.11456e-07	1.05271	205	92	0.0150367	Up-regulated
GDAP2	Pig	4.15566e-07	1.04792	0.26	129	0.0151869	Up-regulated
CFAP97	Pig	4.28656e-07	0.875626	189	79	0.0156652	Up-regulated
ENSSSCG00000038757	Pig	4.30336e-07	2.08406	75	16	0.0157266	Up-regulated
ATP5F1A	Pig	4.32322e-07	1.69581	122	0.04	0.0157992	Up-regulated
RAB28	Pig	4.33451e-07	0.812544	323	174	0.0158405	Up-regulated
ATF1	Pig	4.35732e-07	0.781386	236	109	0.0159238	Up-regulated
TAF10	Pig	4.38639e-07	1.51307	102	29	0.0160301	Up-regulated
ANXA11	Pig	4.4043e-07	0.92943	264	128	0.0160955	Up-regulated
APPL2	Pig	4.56419e-07	0.894025	197	84	0.0166798	Up-regulated
TMX4	Pig	4.78168e-07	1.15476	169	67	0.0174746	Up-regulated
COX5A	Pig	4.78364e-07	1.47462	157	61	0.0174818	Up-regulated
SSH1	Pig	4.79449e-07	0.50309	453	276	0.0175215	Up-regulated
RTCA	Pig	4.80571e-07	1.45762	118	38	0.0175625	Up-regulated
MMAA	Pig	4.82034e-07	1.408	106	31	0.0176159	Up-regulated
FBXL2	Pig	4.94028e-07	1.53448	146	54	0.0180542	Up-regulated
RAB32	Pig	4.94907e-07	3.30292	51	7	0.0180864	Up-regulated
ENSSSCG00000035617	Pig	4.94907e-07	3.39935	51	7	0.0180864	Up-regulated
ASCC1	Pig	4.98694e-07	0.507966	465	279	0.0182248	Up-regulated
ENSSSCG00000023324	Pig	5.02352e-07	0.679749	555	367	0.0183585	Up-regulated
PANK2	Pig	5.02878e-07	0.740883	248	118	0.0183777	Up-regulated
CCN2	Pig	5.03875e-07	0.679651	0.24	113	0.0184141	Up-regulated
MRPL55	Pig	5.07695e-07	2.08309	79	18	0.0185537	Up-regulated
ENSSSCG00000001064	Pig	5.13058e-07	1.43714	126	42	0.0187497	Up-regulated
ERO1B	Pig	5.16326e-07	1.80785	114	36	0.0188691	Up-regulated
NUDT12	Pig	5.16415e-07	2.26073	79	18	0.0188724	Up-regulated
ENSSSCG00000016426	Pig	5.20477e-07	0.740329	264	129	0.0190208	Up-regulated
ATIC	Pig	5.23383e-07	3.06526	51	7	0.019127	Up-regulated
TBC1D20	Pig	5.2651e-07	0.72578	268	134	0.0192413	Up-regulated
AGMO	Pig	5.27302e-07	0.623325	409	233	0.0192703	Up-regulated
POLR2E	Pig	5.49019e-07	1.88282	79	18	0.0200639	Up-regulated
SFXN5	Pig	5.54987e-07	2.02611	67	13	0.020282	Up-regulated
HSPA5	Pig	5.6119e-07	1.09825	0.24	118	0.0205087	Up-regulated
CDYL2	Pig	5.62305e-07	1.82183	98	28	0.0205494	Up-regulated
UBA5	Pig	5.75411e-07	1.08569	213	95	0.0210284	Up-regulated
TPT1	Pig	5.79545e-07	0.869998	362	214	0.0211795	Up-regulated
C7orf50	Pig	5.8443e-07	0.826564	244	117	0.021358	Up-regulated
N6AMT1	Pig	6.00039e-07	1.85842	0.11	34	0.0219284	Up-regulated
DENND4C	Pig	6.03902e-07	0.599285	476	0.3	0.0220696	Up-regulated
MTHFD2L	Pig	6.07806e-07	0.820915	252	124	0.0222123	Up-regulated
ZNF664	Pig	6.12209e-07	1.02965	244	0.12	0.0223732	Up-regulated
CDK7	Pig	6.16619e-07	1.06103	193	83	0.0225344	Up-regulated
USP6NL	Pig	6.25377e-07	0.560956	358	205	0.0228544	Up-regulated
ENSSSCG00000034711	Pig	6.30236e-07	1.30781	0.13	45	0.023032	Up-regulated
TIMM29	Pig	6.32756e-07	2.54698	59	0.01	0.0231241	Up-regulated
ERAP1	Pig	6.36387e-07	1.17132	161	64	0.0232568	Up-regulated
NDUFAF6	Pig	6.42104e-07	1.89092	98	28	0.0234657	Up-regulated
MGME1	Pig	6.48261e-07	1.38818	118	38	0.0236907	Up-regulated
ZNF263	Pig	6.51377e-07	2.38291	59	0.01	0.0238046	Up-regulated
CAT	Pig	6.69464e-07	1.55254	134	47	0.0244656	Up-regulated
KLHL42	Pig	6.71366e-07	1.62377	138	0.05	0.0245351	Up-regulated
INPPL1	Pig	6.89879e-07	1.24906	122	0.04	0.0252116	Up-regulated
WDR92	Pig	7.07436e-07	1.3296	0.15	57	0.0258533	Up-regulated
ENSSSCG00000017103	Pig	7.08681e-07	1.33451	114	36	0.0258987	Up-regulated
ENSSSCG00000000905	Pig	7.11697e-07	1.57729	126	43	0.026009	Up-regulated
CCDC25	Pig	7.12373e-07	0.824252	213	96	0.0260337	Up-regulated
AHR	Pig	7.19327e-07	0.802291	295	158	0.0262878	Up-regulated
DENND10	Pig	7.2064e-07	1.37544	118	38	0.0263358	Up-regulated
SNX7	Pig	7.45144e-07	0.991507	209	94	0.0272313	Up-regulated
ID1	Pig	7.45806e-07	1.00676	177	74	0.0272555	Up-regulated
GIGYF2	Pig	7.48143e-07	0.581591	531	345	0.0273409	Up-regulated
COG3	Pig	7.51787e-07	0.81097	0.39	236	0.0274741	Up-regulated
ZC3H8	Pig	7.56257e-07	1.35703	114	36	0.0276374	Up-regulated
RUNDC3B	Pig	7.59871e-07	2.06518	71	15	0.0277695	Up-regulated
PDE12	Pig	7.85624e-07	1.5583	102	0.03	0.0287106	Up-regulated
CAPNS1	Pig	7.90923e-07	0.77753	213	95	0.0289043	Up-regulated
DNAJC24	Pig	7.92205e-07	1.15987	122	0.04	0.0289511	Up-regulated
ENSSSCG00000013889	Pig	7.96066e-07	0.536052	421	256	0.0290922	Up-regulated
ORC2	Pig	7.9756e-07	1.05397	161	64	0.0291468	Up-regulated
NUP42	Pig	8.15194e-07	1.45529	94	26	0.0297913	Up-regulated
OIP5	Pig	8.21172e-07	2.57853	75	17	0.0300097	Up-regulated
BUD23	Pig	8.22399e-07	1.13868	94	26	0.0300546	Up-regulated
TMEM231	Pig	8.23214e-07	3.51611	47	6	0.0300843	Up-regulated
RAB18	Pig	8.42059e-07	0.618537	362	203	0.030773	Up-regulated
UBQLN1	Pig	8.42403e-07	0.652674	331	178	0.0307856	Up-regulated
RHOF	Pig	8.44836e-07	2.81016	63	12	0.0308745	Up-regulated
PNPO	Pig	8.52328e-07	1.74857	71	15	0.0311483	Up-regulated
PSMB3	Pig	8.55589e-07	2.98477	47	6	0.0312675	Up-regulated
ALS2	Pig	8.61735e-07	1.0887	201	91	0.0314921	Up-regulated
ENSSSCG00000016791	Pig	8.63873e-07	2.01572	47	6	0.0315702	Up-regulated
NOL10	Pig	8.68967e-07	0.727589	189	0.08	0.0317564	Up-regulated
PARN	Pig	8.69522e-07	0.712401	0.35	193	0.0317767	Up-regulated
ENSSSCG00000016768	Pig	8.8255e-07	1.52791	75	17	0.0322528	Up-regulated
REX1BD	Pig	8.92241e-07	1.28736	98	28	0.0326069	Up-regulated
ATP5MD	Pig	8.97779e-07	1.37826	146	55	0.0328093	Up-regulated
FUNDC1	Pig	9.05759e-07	1.54171	71	15	0.033101	Up-regulated
CPEB4	Pig	9.0729e-07	0.559733	445	279	0.0331569	Up-regulated
RAD9B	Pig	9.12917e-07	2.62625	63	12	0.0333625	Up-regulated
USP47	Pig	9.18705e-07	0.630381	551	373	0.0335741	Up-regulated
WDR89	Pig	9.23726e-07	1.56924	71	15	0.0337576	Up-regulated
GEMIN4	Pig	9.40938e-07	1.54842	154	61	0.0343866	Up-regulated
ENSSSCG00000028691	Pig	9.55984e-07	0.977702	126	43	0.0349364	Up-regulated
KYAT3	Pig	9.60227e-07	1.22014	0.15	57	0.0350915	Up-regulated
ARID5B	Pig	9.68709e-07	0.53197	299	159	0.0354015	Up-regulated
TFB1M	Pig	9.78699e-07	0.93922	236	114	0.0357666	Up-regulated
CHSY1	Pig	9.84052e-07	0.630727	386	222	0.0359622	Up-regulated
2,00 LSM	Pig	9.8465e-07	2.10373	75	17	0.035984	Up-regulated
TYW5	Pig	1.00547e-06	1.16375	126	43	0.036745	Up-regulated
ERMARD	Pig	1.033e-06	0.978879	0.24	119	0.0377511	Up-regulated
STK38L	Pig	1.04275e-06	0.804917	402	257	0.0381073	Up-regulated
IRAK1BP1	Pig	1.04495e-06	2.63644	55	9	0.0381877	Up-regulated
SLC25A5	Pig	1.06733e-06	2.55318	55	9	0.0390054	Up-regulated
ENSSSCG00000038630	Pig	1.07641e-06	2.09006	55	9	0.0393373	Up-regulated
WDR64	Pig	1.08097e-06	2.48803	55	9	0.0395042	Up-regulated
GPAT3	Pig	1.09016e-06	2.51964	55	9	0.0398401	Up-regulated
ENSSSCG00000037808	Pig	1.10792e-06	1.38572	79	19	0.0404889	Up-regulated
S100A6	Human	1.14868e-06	6.54944	24	0	0.0419785	Up-regulated
KCNMA1	Pig	1.14868e-06	8.78762	24	0	0.0419785	Up-regulated
JAKMIP3	Pig	1.14868e-06	6.13791	24	0	0.0419785	Up-regulated
TENM3	Pig	1.14868e-06	6.01802	24	0	0.0419785	Up-regulated
CRYAB	Pig	1.14868e-06	5.90429	24	0	0.0419785	Up-regulated
CDS1	Pig	1.14868e-06	6.69122	24	0	0.0419785	Up-regulated
ENSSSCG00000035736	Pig	1.14868e-06	6.96153	24	0	0.0419785	Up-regulated
KHDRBS3	Pig	1.14868e-06	5.28006	24	0	0.0419785	Up-regulated
SORT1	Pig	1.14868e-06	5.53884	24	0	0.0419785	Up-regulated
DHRS4	Pig	1.14868e-06	5.89102	24	0	0.0419785	Up-regulated
PPARA	Pig	1.14868e-06	5.96095	24	0	0.0419785	Up-regulated
P379-gp10	pCMV	1.14868e-06	5.27857	24	0	0.0419785	Up-regulated
P379-gp11	pCMV	1.14868e-06	6.20203	24	0	0.0419785	Up-regulated
NUP50	Pig	1.15149e-06	0.743609	177	75	0.0420811	Up-regulated
MITF	Pig	1.15989e-06	1.37149	157	64	0.0423882	Up-regulated
CAMKMT	Pig	1.18175e-06	0.998385	0.28	147	0.0431872	Up-regulated
PDE7A	Pig	1.19495e-06	3.33135	43	5	0.0436694	Up-regulated
EDA	Pig	1.20099e-06	3.56745	43	5	0.0438902	Up-regulated
INTS9	Pig	1.20473e-06	1.12033	232	113	0.0440267	Up-regulated
EHHADH	Pig	1.20706e-06	3.48022	43	5	0.044112	Up-regulated
GEMIN7	Pig	1.23211e-06	1.6882	83	21	0.0450275	Up-regulated
RHOD	Pig	1.24411e-06	3.17915	43	5	0.0454659	Up-regulated
CCDC167	Pig	1.25005e-06	1.6788	79	19	0.0456829	Up-regulated
NVL	Pig	1.25533e-06	0.770925	303	162	0.0458761	Up-regulated
FGF14	Pig	1.2567e-06	2.82267	43	5	0.045926	Up-regulated
AAMP	Pig	1.26304e-06	3.12317	43	5	0.0461577	Up-regulated
CHD8	Pig	1.26635e-06	0.708288	252	125	0.0462787	Up-regulated
DNAH12	Pig	1.28548e-06	2.1463	67	14	0.0469777	Up-regulated
TOE1	Pig	1.28871e-06	2.46096	43	5	0.0470959	Up-regulated
TMEM209	Pig	1.29979e-06	1.39571	79	19	0.047501	Up-regulated
BCLAF1	Pig	1.33274e-06	0.526256	484	316	0.0487051	Up-regulated
ENSSSCG00000021815	Pig	1.33308e-06	0.996876	157	63	0.0487173	Up-regulated
LEMD2	Pig	1.33467e-06	0.605482	189	81	0.0487755	Up-regulated
ENSSSCG00000022842	Pig	1.33538e-06	1.03429	114	37	0.0488013	Up-regulated
ENSSSCG00000050264	Pig	1.35511e-06	2.24952	43	5	0.0495224	Up-regulated
FAM214A	Pig	1.35533e-06	1.013	323	182	0.0495307	Up-regulated
PTPRM	Pig	3.11203e-59	-1.20664	984	991	1.13729e-54	Down-regulated
EXT1	Pig	9.47065e-58	-1.89393	709	924	3.46105e-53	Down-regulated
CCDC85A	Pig	2.4916e-55	-1.80505	685	917	9.10554e-51	Down-regulated
MECOM	Pig	4.43976e-47	-1.41986	886	953	1.62251e-42	Down-regulated
DPYD	Pig	9.77083e-46	-1.73823	0.65	847	3.57075e-41	Down-regulated
MYO1E	Pig	1.08254e-45	-1.80322	811	922	3.95614e-41	Down-regulated
AUTS2	Pig	1.46676e-43	-1.86464	642	874	5.36027e-39	Down-regulated
HSPG2	Pig	2.03378e-43	-1.88702	598	827	7.43246e-39	Down-regulated
KIT	Pig	2.54667e-43	-1.57273	846	936	9.30682e-39	Down-regulated
FILIP1	Pig	1.3218e-41	-2.29022	437	763	4.83053e-37	Down-regulated
PHACTR2	Pig	2.36479e-41	-1.28278	843	942	8.64213e-37	Down-regulated
APBB2	Pig	8.46104e-41	-1.22239	843	937	3.09209e-36	Down-regulated
EXOC6B	Pig	4.71155e-40	-1.14506	846	909	1.72184e-35	Down-regulated
TCF4	Pig	2.74654e-39	-0.992543	0.98	976	1.00372e-34	Down-regulated
GALNT18	Pig	1.95182e-38	-2.03098	449	776	7.13293e-34	Down-regulated
COX2	Pig	2.12407e-38	-3.07747	201	617	7.76243e-34	Down-regulated
CDC42BPA	Pig	2.45582e-37	-1.18572	874	924	8.97481e-33	Down-regulated
ABLIM1	Pig	3.2885e-36	-1.55907	657	822	1.20178e-31	Down-regulated
MAGI1	Pig	1.45083e-35	-0.950669	965	979	5.30206e-31	Down-regulated
COX3	Pig	1.58365e-34	-3.03009	193	589	5.78744e-30	Down-regulated
MYO1B	Pig	6.35765e-34	-2.66916	307	651	2.3234e-29	Down-regulated
ABLIM3	Pig	1.08133e-32	-1.44275	728	855	3.9517e-28	Down-regulated
ENSSSCG00000012362	Pig	3.29823e-31	-1.89883	437	721	1.20534e-26	Down-regulated
PREX2	Pig	1.9668e-29	-1.29536	748	0.87	7.18766e-25	Down-regulated
DACH1	Pig	2.40557e-29	-1.78306	579	769	8.79115e-25	Down-regulated
DNM3	Pig	5.42299e-28	-1.54319	583	765	1.98183e-23	Down-regulated
ARHGEF28	Pig	8.88812e-28	-1.77085	504	758	3.24816e-23	Down-regulated
DISC1	Pig	1.02052e-27	-1.54095	555	767	3.7295e-23	Down-regulated
DOCK1	Pig	5.06475e-27	-1.13398	0.78	865	1.85091e-22	Down-regulated
ENSSSCG00000049691	Pig	4.48091e-26	-3.47571	0.11	0.46	1.63755e-21	Down-regulated
MAST4	Pig	4.7761e-26	-0.966364	866	916	1.74543e-21	Down-regulated
HMCN1	Pig	7.96238e-26	-2.30587	276	585	2.90985e-21	Down-regulated
MYO10	Pig	3.77183e-25	-1.40436	602	826	1.37841e-20	Down-regulated
PDGFD	Pig	5.53219e-25	-1.51224	614	811	2.02174e-20	Down-regulated
FRYL	Pig	8.56555e-25	-1.16499	776	853	3.13028e-20	Down-regulated
ENSSSCG00000044700	Pig	1.52727e-24	-1.08831	839	897	5.58139e-20	Down-regulated
CCSER1	Pig	3.45012e-24	-1.2787	591	801	1.26085e-19	Down-regulated
ADGRF5	Pig	3.73732e-24	-1.27454	705	853	1.3658e-19	Down-regulated
TTC28	Pig	4.00986e-24	-0.985424	846	892	1.4654e-19	Down-regulated
TSPAN18	Pig	1.37127e-23	-2.25881	161	497	5.01132e-19	Down-regulated
ATP6	Pig	1.445e-22	-3.37899	67	383	5.28075e-18	Down-regulated
SIPA1L2	Pig	6.20244e-22	-2.13727	346	597	2.26668e-17	Down-regulated
PARD3B	Pig	7.67275e-22	-1.75089	449	654	2.80401e-17	Down-regulated
FBXL7	Pig	2.41963e-21	-1.22836	752	827	8.84253e-17	Down-regulated
ITGA6	Pig	2.57455e-21	-1.32175	591	759	9.4087e-17	Down-regulated
SASH1	Pig	3.35377e-21	-1.40458	492	716	1.22564e-16	Down-regulated
UNC5B	Pig	4.05312e-21	-3.26952	79	383	1.48121e-16	Down-regulated
CDK17	Pig	2.03109e-20	-1.25329	673	779	7.42261e-16	Down-regulated
RAPGEF2	Pig	3.14684e-20	-1.02547	835	868	1.15001e-15	Down-regulated
TEAD1	Pig	5.79601e-20	-1.21308	539	731	2.11815e-15	Down-regulated
RAPGEF1	Pig	1.57723e-19	-1.73602	453	652	5.76399e-15	Down-regulated
COL4A2	Pig	1.9257e-19	-1.03158	768	848	7.03749e-15	Down-regulated
GRB10	Pig	9.15782e-19	-1.3639	618	724	3.34673e-14	Down-regulated
ENSSSCG00000010172	Pig	1.4294e-18	-1.59376	531	693	5.22375e-14	Down-regulated
DISP1	Pig	1.91699e-18	-1.385	563	724	7.00566e-14	Down-regulated
NRP1	Pig	1.20278e-17	-0.929725	776	859	4.39555e-13	Down-regulated
SLC8A1	Pig	1.5674e-17	-2.91851	122	396	5.72806e-13	Down-regulated
RAPGEF5	Pig	1.91532e-17	-1.47211	528	692	6.99955e-13	Down-regulated
ATP2B4	Pig	2.33993e-17	-2.08835	177	451	8.55126e-13	Down-regulated
ARHGEF3	Pig	2.8553e-17	-1.72362	343	0.57	1.04347e-12	Down-regulated
LPP	Pig	3.92779e-17	-0.872336	874	879	1.43541e-12	Down-regulated
ENSSSCG00000015645	Pig	3.94687e-17	-0.990123	0.78	836	1.44239e-12	Down-regulated
SNCAIP	Pig	6.27546e-17	-3.814	59	309	2.29337e-12	Down-regulated
OSBPL10	Pig	6.67899e-17	-1.87253	299	556	2.44084e-12	Down-regulated
PDE4B	Pig	1.29913e-16	-2.51597	134	393	4.74766e-12	Down-regulated
DGKH	Pig	1.76194e-16	-0.780877	831	898	6.43901e-12	Down-regulated
ZEB1	Pig	1.82173e-16	-0.790691	843	865	6.65751e-12	Down-regulated
TRIO	Pig	2.02587e-16	-0.825216	0.76	818	7.40355e-12	Down-regulated
FLNB	Pig	2.6797e-16	-1.33861	0.5	669	9.79297e-12	Down-regulated
TJP1	Pig	4.15708e-16	-1.14769	665	731	1.51921e-11	Down-regulated
C1orf21	Pig	7.8283e-16	-0.975484	689	775	2.86085e-11	Down-regulated
PLEKHG1	Pig	1.32862e-15	-0.7683	823	869	4.85544e-11	Down-regulated
TTC7B	Pig	3.58674e-15	-1.66149	303	515	1.31077e-10	Down-regulated
COX1	Pig	4.11206e-15	-1.7782	0.28	508	1.50275e-10	Down-regulated
GPR137C	Pig	4.63239e-15	-4.21736	35	258	1.69291e-10	Down-regulated
DAPK1	Pig	6.13482e-15	-1.89571	118	373	2.24197e-10	Down-regulated
CYTB	Pig	1.335e-14	-3.51551	39	0.26	4.87877e-10	Down-regulated
ND4	Pig	1.63063e-14	-3.94767	28	241	5.95913e-10	Down-regulated
ST3GAL1	Pig	3.02912e-14	-1.66784	0.24	477	1.10699e-09	Down-regulated
VWF	Pig	5.94082e-14	-1.2758	539	647	2.17107e-09	Down-regulated
AFDN	Pig	7.09533e-14	-1.17271	591	696	2.59299e-09	Down-regulated
MALAT1	Human	8.21338e-14	-3.20154	16	217	3.00158e-09	Down-regulated
15,00 ARL	Pig	1.03547e-13	-0.915823	831	871	3.78413e-09	Down-regulated
ENSSSCG00000030362	Pig	1.58289e-13	-1.94865	185	412	5.78468e-09	Down-regulated
PLCL1	Pig	2.44206e-13	-2.76013	126	0.34	8.92451e-09	Down-regulated
RBMS3	Pig	2.68455e-13	-0.589643	925	916	9.8107e-09	Down-regulated
HBB	Human	3.28146e-13	-9.22797	0	0.18	1.19921e-08	Down-regulated
ADGRL2	Pig	5.21057e-13	-1.12445	744	0.77	1.9042e-08	Down-regulated
RHOA	Pig	6.25128e-13	-0.886368	0.63	741	2.28453e-08	Down-regulated
QKI	Pig	1.38625e-12	-0.612626	0.89	874	5.06605e-08	Down-regulated
SEMA6A	Pig	1.64891e-12	-1.86124	256	464	6.02596e-08	Down-regulated
KLF6	Pig	1.72141e-12	-1.42247	378	0.57	6.2909e-08	Down-regulated
PLCB4	Pig	2.38986e-12	-0.751927	925	907	8.73375e-08	Down-regulated
RNF125	Pig	2.94637e-12	-1.74783	287	487	1.07675e-07	Down-regulated
RBPMS	Pig	4.22385e-12	-1.02857	539	665	1.5436e-07	Down-regulated
FARP1	Pig	4.47452e-12	-1.39751	343	538	1.63521e-07	Down-regulated
ENSSSCG00000012262	Pig	5.79445e-12	-1.01101	539	654	2.11758e-07	Down-regulated
ITGA9	Pig	6.30683e-12	-1.58974	295	488	2.30483e-07	Down-regulated
ENSSSCG00000011729	Pig	8.28633e-12	-1.08076	531	651	3.02824e-07	Down-regulated
RALB	Pig	1.07921e-11	-1.7678	295	473	3.94396e-07	Down-regulated
SEL1L3	Pig	1.12487e-11	-2.03497	209	408	4.11083e-07	Down-regulated
FNDC3B	Pig	1.27517e-11	-0.617936	878	873	4.66011e-07	Down-regulated
ICA1	Pig	1.389e-11	-1.34594	402	563	5.07609e-07	Down-regulated
PHLDB2	Pig	2.01178e-11	-1.26545	331	521	7.35204e-07	Down-regulated
KLF7	Pig	2.05344e-11	-1.21988	488	619	7.50431e-07	Down-regulated
CDH13	Pig	2.43292e-11	-0.749476	819	847	8.89111e-07	Down-regulated
ENSSSCG00000016810	Pig	2.51056e-11	-4.22406	0.02	187	9.17486e-07	Down-regulated
KCTD16	Pig	3.19066e-11	-2.1426	126	327	1.16603e-06	Down-regulated
GALNT1	Pig	3.24417e-11	-1.09557	661	0.73	1.18558e-06	Down-regulated
CMTM8	Pig	3.82865e-11	-1.48209	354	519	1.39918e-06	Down-regulated
LNX1	Pig	5.07064e-11	-2.74471	71	258	1.85307e-06	Down-regulated
NOX4	Pig	7.52432e-11	-1.03561	512	667	2.74976e-06	Down-regulated
WWTR1	Pig	7.91508e-11	-0.880153	0.72	768	2.89257e-06	Down-regulated
NR3C2	Pig	8.6578e-11	-1.76555	287	456	3.16399e-06	Down-regulated
ARHGAP21	Pig	1.01042e-10	-1.14087	535	661	3.69258e-06	Down-regulated
HCN1	Pig	1.04076e-10	-2.49692	193	369	3.80345e-06	Down-regulated
NEDD4L	Pig	1.21193e-10	-1.50306	398	541	4.429e-06	Down-regulated
ASAP2	Pig	1.24501e-10	-1.14615	591	676	4.5499e-06	Down-regulated
DST	Pig	1.43522e-10	-0.669207	843	852	5.24503e-06	Down-regulated
EGLN3	Pig	1.64367e-10	-1.61126	197	403	6.0068e-06	Down-regulated
ENSSSCG00000022128	Pig	1.78626e-10	-1.79947	0.24	0.42	6.52788e-06	Down-regulated
NREP	Pig	1.80177e-10	-5.45891	8	156	6.58458e-06	Down-regulated
NID2	Pig	1.89983e-10	-1.10272	0.39	565	6.94295e-06	Down-regulated
EEPD1	Pig	2.49274e-10	-1.57689	315	483	9.10972e-06	Down-regulated
NTF3	Pig	2.93051e-10	-4.06241	24	179	1.07096e-05	Down-regulated
PTPRB	Pig	4.54737e-10	-0.718619	787	828	1.66184e-05	Down-regulated
TEX14	Pig	4.5882e-10	-2.03551	0.13	0.31	1.67676e-05	Down-regulated
ARHGAP26	Pig	6.38068e-10	-0.96578	563	678	2.33182e-05	Down-regulated
VEGFC	Pig	6.39186e-10	-2.56075	83	258	2.33591e-05	Down-regulated
BCL6B	Pig	7.08621e-10	-1.8772	106	293	2.58966e-05	Down-regulated
CREB5	Pig	7.12314e-10	-2.01674	181	361	2.60315e-05	Down-regulated
TNS1	Pig	7.19596e-10	-1.02402	504	0.63	2.62977e-05	Down-regulated
MACROD2	Pig	7.77819e-10	-1.14179	362	542	2.84254e-05	Down-regulated
SH3PXD2A	Pig	9.12887e-10	-1.6151	331	477	3.33615e-05	Down-regulated
SMURF2	Pig	9.95143e-10	-0.89671	0.65	708	3.63675e-05	Down-regulated
PPP1R16B	Pig	1.14484e-09	-1.42835	0.28	457	4.18381e-05	Down-regulated
DYSF	Pig	1.19286e-09	-1.13472	524	619	4.3593e-05	Down-regulated
TP53I11	Pig	1.5421e-09	-2.99371	16	159	5.63559e-05	Down-regulated
SGMS1	Pig	1.77089e-09	-0.766397	756	784	6.47171e-05	Down-regulated
ND1	Pig	1.80513e-09	-5.0837	8	142	6.59684e-05	Down-regulated
EPB41L4A	Pig	1.93589e-09	-0.741888	803	832	7.07471e-05	Down-regulated
PIK3C2B	Pig	2.00532e-09	-1.57951	205	386	7.32845e-05	Down-regulated
ENSSSCG00000033385	Pig	2.33246e-09	-0.943814	646	719	8.52398e-05	Down-regulated
PRICKLE2	Pig	2.46933e-09	-2.2327	122	293	9.02416e-05	Down-regulated
FRMD4B	Pig	2.97172e-09	-1.29417	437	553	0.000108602	Down-regulated
ENSSSCG00000040100	Pig	3.44944e-09	-1.19279	453	583	0.00012606	Down-regulated
UNC13B	Pig	3.66424e-09	-1.71819	291	434	0.00013391	Down-regulated
SH3D19	Pig	4.5383e-09	-0.997076	465	584	0.000165852	Down-regulated
DAPK2	Pig	4.81281e-09	-3.88449	0.02	157	0.000175884	Down-regulated
ENSSSCG00000033497	Pig	6.50916e-09	-0.680041	713	753	0.000237877	Down-regulated
ATXN1	Pig	7.55757e-09	-0.750221	724	769	0.000276191	Down-regulated
ACVR2A	Pig	7.75803e-09	-1.22279	425	554	0.000283517	Down-regulated
NAV1	Pig	7.85842e-09	-1.23059	354	509	0.000287186	Down-regulated
PKP4	Pig	8.89288e-09	-1.04661	0.52	623	0.00032499	Down-regulated
MGLL	Pig	8.98753e-09	-1.08565	488	606	0.000328449	Down-regulated
ENSSSCG00000009338	Pig	9.47151e-09	-1.31047	291	441	0.000346136	Down-regulated
LAMB1	Pig	9.96544e-09	-1.22201	524	614	0.000364187	Down-regulated
PLXDC2	Pig	1.02329e-08	-1.07364	563	642	0.000373962	Down-regulated
PPP2R5A	Pig	1.03383e-08	-1.03735	567	631	0.000377815	Down-regulated
JAZF1	Pig	1.07457e-08	-1.02725	0.39	543	0.0003927	Down-regulated
PLK2	Pig	1.63586e-08	-1.60443	157	329	0.000597825	Down-regulated
MTMR12	Pig	1.64396e-08	-2.41441	94	247	0.000600786	Down-regulated
FOXN3	Pig	1.67293e-08	-0.753686	768	785	0.000611373	Down-regulated
TANC2	Pig	1.68595e-08	-1.05877	224	395	0.00061613	Down-regulated
MCAM	Pig	1.83279e-08	-1.96882	91	253	0.000669793	Down-regulated
PIP4K2A	Pig	2.30298e-08	-0.911087	567	655	0.000841625	Down-regulated
ETS1	Pig	2.91844e-08	-0.737029	823	801	0.00106654	Down-regulated
MYO1D	Pig	3.38607e-08	-1.28184	476	586	0.00123744	Down-regulated
ACTN4	Pig	3.62067e-08	-0.786505	626	723	0.00132317	Down-regulated
MAP4K3	Pig	4.2071e-08	-0.794443	732	754	0.00153748	Down-regulated
CTNND1	Pig	4.23684e-08	-0.612085	0.74	0.77	0.00154835	Down-regulated
ELK3	Pig	4.5571e-08	-1.08736	496	597	0.00166539	Down-regulated
PALD1	Pig	5.13558e-08	-1.41011	283	428	0.0018768	Down-regulated
FLI1	Pig	5.36965e-08	-0.676246	803	816	0.00196234	Down-regulated
ENSSSCG00000022925	Pig	7.14508e-08	-0.769964	602	703	0.00261117	Down-regulated
HBA2	Human	8.15282e-08	-7.96734	0	104	0.00297945	Down-regulated
LDB2	Pig	9.35863e-08	-0.739184	732	773	0.00342011	Down-regulated
PLXND1	Pig	1.22949e-07	-1.27859	268	426	0.00449316	Down-regulated
SMURF1	Pig	1.2649e-07	-1.08175	413	533	0.00462258	Down-regulated
HSPA12B	Pig	1.46929e-07	-1.4421	213	366	0.00536952	Down-regulated
ENSSSCG00000006231	Pig	1.48051e-07	-0.744585	0.61	681	0.00541053	Down-regulated
PDE10A	Pig	1.63895e-07	-1.38334	354	483	0.00598956	Down-regulated
DLC1	Pig	1.87749e-07	-1.05117	291	438	0.0068613	Down-regulated
RIN2	Pig	2.39588e-07	-0.565805	858	858	0.00875574	Down-regulated
IGFBP5	Pig	2.40183e-07	-8.18989	0	97	0.00877748	Down-regulated
CXCL12	Pig	3.06512e-07	-1.55611	173	329	0.0112015	Down-regulated
SPRED2	Pig	3.8341e-07	-1.06127	0.39	512	0.0140117	Down-regulated
AGAP1	Pig	4.51437e-07	-1.08003	504	591	0.0164978	Down-regulated
VIM	Pig	4.52943e-07	-0.995696	445	558	0.0165528	Down-regulated
CHSY3	Pig	4.64552e-07	-1.47043	358	478	0.0169771	Down-regulated
IYD	Pig	4.74201e-07	-1.87735	75	208	0.0173297	Down-regulated
ND2	Pig	5.3428e-07	-2.74186	24	134	0.0195253	Down-regulated
LBR	Pig	5.54245e-07	-1.89433	94	0.23	0.0202549	Down-regulated
MAP3K5	Pig	5.70764e-07	-1.52442	0.15	294	0.0208586	Down-regulated
TSPAN15	Pig	6.46963e-07	-1.38571	193	337	0.0236433	Down-regulated
MYORG	Pig	6.81468e-07	-0.955156	346	481	0.0249043	Down-regulated
ENSSSCG00000016119	Pig	7.40285e-07	-1.24986	236	381	0.0270537	Down-regulated
FNBP1L	Pig	7.48599e-07	-1.06715	547	595	0.0273576	Down-regulated
SVIL	Pig	8.52592e-07	-0.657411	866	849	0.031158	Down-regulated
XXYLT1	Pig	8.56549e-07	-1.83136	197	0.33	0.0313026	Down-regulated
LTBP4	Pig	9.23836e-07	-1.99828	71	0.2	0.0337616	Down-regulated
ENSSSCG00000029160	Pig	1.07715e-06	-1.26721	531	584	0.0393645	Down-regulated
ENSSSCG00000006156	Pig	1.15381e-06	-1.20406	268	405	0.0421661	Down-regulated
PLS3	Pig	1.26699e-06	-0.870487	673	709	0.0463023	Down-regulated
PTK2	Pig	1.30068e-06	-0.58383	819	798	0.0475333	Down-regulated
EHD2	Pig	1.36154e-06	-1.32442	307	432	0.0497576	Down-regulated

## Sheet: Endocardial lymphatic EC
gene	Species	p_val	avg_log2FC	pct. 1	pct.2	p_val_adj	level
MECOM	Pig	6.06226e-07	-9.68737	0	1	0.0221545	Down-regulated

## Sheet: FB
gene	Species	p_val	avg_log2FC	pct. 1	pct.2	p_val_adj	level
ENSSSCG00000034570	Pig	1.47135e-117	8.15636	733	21	5.37706e-113	Up-regulated
OAS2	Pig	4.98855e-113	5.27032	743	68	1.82307e-108	Up-regulated
PAM	Pig	3.52678e-108	2.87966	856	496	1.28886e-103	Up-regulated
MX2	Pig	1.77985e-101	9.29671	665	5	6.50447e-97	Up-regulated
IFI44L	Pig	2.49732e-97	5.08903	694	108	9.12644e-93	Up-regulated
MX1	Pig	3.09655e-92	5.47266	641	21	1.13163e-87	Up-regulated
RSAD2	Pig	1.98452e-85	11.1994	593	0	7.25243e-81	Up-regulated
ALDH1A2	Pig	1.53216e-82	2.96701	759	302	5.59929e-78	Up-regulated
THRB	Pig	7.58319e-81	2.01865	856	551	2.77128e-76	Up-regulated
ENSSSCG00000017146	Pig	2.72008e-80	3.71777	681	163	9.94052e-76	Up-regulated
USP18	Pig	1.82739e-78	6.71723	577	24	6.67818e-74	Up-regulated
HERC6	Pig	2.11693e-77	5.28596	595	52	7.73631e-73	Up-regulated
EIF2AK2	Pig	6.03141e-71	3.18055	657	202	2.20418e-66	Up-regulated
TXNIP	Pig	5.12611e-66	4.02721	596	134	1.87334e-61	Up-regulated
ISG12(A)	Pig	7.60957e-65	6.98735	505	16	2.78092e-60	Up-regulated
ABI3BP	Pig	1.06175e-63	4.17561	558	73	3.88017e-59	Up-regulated
ZBTB20	Pig	1.2248e-63	1.03936	951	879	4.47603e-59	Up-regulated
ADGRD1	Pig	3.25867e-62	2.80545	661	199	1.19088e-57	Up-regulated
HERC5	Pig	2.32761e-61	5.00448	508	31	8.50626e-57	Up-regulated
ENSSSCG00000010893	Pig	8.05114e-60	3.13466	629	205	2.94229e-55	Up-regulated
IFI44	Pig	6.51982e-58	4.64042	0.5	0.05	2.38267e-53	Up-regulated
IFIT1	Pig	9.80326e-58	6.60617	469	18	3.5826e-53	Up-regulated
ENSSSCG00000016263	Pig	4.00599e-57	4.90388	495	47	1.46399e-52	Up-regulated
ENSSSCG00000011121	Pig	7.28686e-55	1.95671	736	367	2.66298e-50	Up-regulated
GHSR	Pig	4.81262e-51	1.92862	726	394	1.75877e-46	Up-regulated
SAT1	Pig	3.85091e-50	2.61933	679	388	1.40731e-45	Up-regulated
GSN	Pig	9.46454e-50	1.88809	0.79	0.57	3.45881e-45	Up-regulated
BST2	Pig	1.6704e-48	5.67763	419	18	6.10447e-44	Up-regulated
ENSSSCG00000004387	Pig	5.1225e-48	1.57119	813	612	1.87202e-43	Up-regulated
ENSSSCG00000027046	Pig	1.28147e-47	4.42802	415	16	4.68314e-43	Up-regulated
ENSSSCG00000002259	Pig	8.01983e-46	1.26808	847	0.74	2.93085e-41	Up-regulated
SPARCL1	Pig	4.15749e-45	3.22076	534	163	1.51935e-40	Up-regulated
SPTBN1	Pig	6.57161e-45	1.25619	859	774	2.4016e-40	Up-regulated
PID1	Pig	1.68688e-44	1.14741	886	646	6.16469e-40	Up-regulated
EPSTI1	Pig	5.40227e-44	3.9978	0.43	52	1.97426e-39	Up-regulated
PLXDC2	Pig	1.07805e-43	0.940156	939	824	3.93973e-39	Up-regulated
FOXO1	Pig	1.91196e-43	1.39739	806	593	6.98727e-39	Up-regulated
PDE4D	Pig	6.13958e-42	2.04386	654	386	2.24371e-37	Up-regulated
FGF2	Pig	7.71198e-42	2.39334	647	362	2.81834e-37	Up-regulated
IFIH1	Pig	8.99504e-42	3.6954	434	71	3.28724e-37	Up-regulated
FKBP5	Pig	1.30657e-41	0.887575	0.93	885	4.77487e-37	Up-regulated
SLC40A1	Pig	2.11252e-41	2.40151	569	213	7.72021e-37	Up-regulated
EBF1	Pig	3.12348e-41	0.904806	954	869	1.14147e-36	Up-regulated
STAT1	Pig	3.16261e-41	1.90496	641	349	1.15577e-36	Up-regulated
PDE3A	Pig	3.8618e-41	1.18649	853	719	1.41129e-36	Up-regulated
CAMK2D	Pig	4.49198e-41	1.03168	0.86	772	1.64159e-36	Up-regulated
MGP	Pig	6.50795e-41	1.87137	654	0.32	2.37833e-36	Up-regulated
SETX	Pig	7.91766e-41	1.80065	706	459	2.89351e-36	Up-regulated
ACSS3	Pig	1.33938e-40	3.28621	466	0.11	4.89476e-36	Up-regulated
JAK2	Pig	1.96398e-40	1.76423	0.76	609	7.17738e-36	Up-regulated
KCNMA1	Pig	2.43323e-38	5.77567	374	39	8.89225e-34	Up-regulated
IQGAP2	Pig	2.56312e-38	3.01237	482	136	9.36693e-34	Up-regulated
ENSSSCG00000014280	Pig	9.00026e-37	1.74013	707	517	3.28915e-32	Up-regulated
MAMDC2	Pig	5.87986e-36	2.35726	504	171	2.1488e-31	Up-regulated
ENSSSCG00000002260	Pig	2.91001e-35	1.51041	716	535	1.06346e-30	Up-regulated
SVIL	Pig	1.04475e-34	1.48787	678	417	3.81803e-30	Up-regulated
ISG15	Pig	1.69562e-34	6.6078	311	5	6.19664e-30	Up-regulated
GALNT15	Pig	3.60977e-34	2.95907	396	71	1.31919e-29	Up-regulated
DDX60	Pig	4.47321e-34	5.03576	328	21	1.63473e-29	Up-regulated
C7	Pig	6.67163e-34	2.55041	431	102	2.43815e-29	Up-regulated
COL12A1	Pig	7.40294e-34	1.64264	729	522	2.7054e-29	Up-regulated
PARP14	Pig	8.22339e-34	4.95165	319	13	3.00524e-29	Up-regulated
SESN1	Pig	3.77983e-33	1.57994	696	475	1.38134e-28	Up-regulated
RGMA	Pig	4.09362e-33	2.53696	501	197	1.49601e-28	Up-regulated
PARP12	Pig	4.59078e-33	3.04202	425	115	1.6777e-28	Up-regulated
NUPR1	Pig	2.79838e-32	3.68877	388	81	1.02267e-27	Up-regulated
PARD3B	Pig	2.8616e-32	1.53743	675	459	1.04577e-27	Up-regulated
PDE7B	Pig	6.41819e-32	2.25056	549	265	2.34553e-27	Up-regulated
LIN7A	Pig	1.54205e-31	3.15784	409	108	5.63543e-27	Up-regulated
ENSSSCG00000015814	Pig	5.28096e-31	2.04206	598	357	1.92993e-26	Up-regulated
ZFY	Pig	6.21559e-31	8.88924	277	0	2.27149e-26	Up-regulated
AKAP7	Pig	6.68261e-31	2.83394	438	144	2.44216e-26	Up-regulated
AOPEP	Pig	6.0842e-30	0.995495	838	756	2.22347e-25	Up-regulated
PML	Pig	6.92877e-30	3.21776	375	84	2.53212e-25	Up-regulated
ENSSSCG00000025253	Pig	8.58816e-30	9.06053	268	0	3.13854e-25	Up-regulated
TRPS1	Pig	1.41594e-29	0.954149	861	777	5.17454e-25	Up-regulated
ZNFX1	Pig	3.87799e-29	2.98217	387	0.1	1.41721e-24	Up-regulated
LGALS3BP	Pig	7.67998e-29	4.87541	288	18	2.80665e-24	Up-regulated
KDM5D	Pig	8.28793e-28	6.71768	257	3	3.02883e-23	Up-regulated
NOX4	Pig	2.66273e-27	1.41192	711	525	9.73094e-23	Up-regulated
MAGI2	Pig	1.78464e-26	1.54483	567	299	6.52196e-22	Up-regulated
KDSR	Pig	3.65594e-26	2.3131	464	205	1.33606e-21	Up-regulated
TRANK1	Pig	3.84093e-26	2.57422	373	102	1.40367e-21	Up-regulated
DST	Pig	4.28914e-26	1.0261	829	766	1.56747e-21	Up-regulated
FBXO39	Pig	5.63437e-26	2.07445	431	157	2.05908e-21	Up-regulated
GHR	Pig	5.99031e-26	1.49713	623	433	2.18916e-21	Up-regulated
PIK3R1	Pig	8.71e-26	1.54802	655	472	3.18307e-21	Up-regulated
PDE1A	Pig	8.76678e-26	1.16406	713	514	3.20382e-21	Up-regulated
ENSSSCG00000001229	Pig	1.95221e-25	2.38223	435	181	7.13434e-21	Up-regulated
TENM3	Pig	5.96038e-25	0.912068	807	627	2.17822e-20	Up-regulated
CMPK2	Pig	6.36786e-25	4.30456	256	16	2.32713e-20	Up-regulated
TRIM22	Pig	6.46836e-25	3.19241	331	79	2.36386e-20	Up-regulated
MAML2	Pig	9.51872e-25	0.660351	938	895	3.47862e-20	Up-regulated
B2M	Pig	1.05999e-24	1.93699	506	276	3.87374e-20	Up-regulated
ZBP1	Pig	6.81072e-24	5.83987	237	0.01	2.48898e-19	Up-regulated
UBE2L6	Pig	7.17253e-24	5.05625	248	18	2.6212e-19	Up-regulated
ENSSSCG00000032436	Pig	1.13988e-23	5.66876	232	8	4.16567e-19	Up-regulated
ENSSSCG00000026430	Pig	1.3291e-23	8.37009	219	0	4.85719e-19	Up-regulated
ABCA6	Pig	1.80357e-23	1.33735	536	278	6.59114e-19	Up-regulated
RASGEF1B	Pig	2.15031e-23	3.49529	295	55	7.85831e-19	Up-regulated
ZFAND5	Pig	2.15828e-23	2.58645	393	155	7.88744e-19	Up-regulated
PDGFD	Pig	3.31367e-23	1.25121	722	551	1.21098e-18	Up-regulated
GAB2	Pig	3.97295e-23	1.28038	739	593	1.45192e-18	Up-regulated
NECAB1	Pig	1.64943e-22	3.95736	255	31	6.02783e-18	Up-regulated
DDX5	Pig	3.22227e-22	1.25329	627	488	1.17758e-17	Up-regulated
FBXL7	Pig	4.99801e-22	0.835769	865	793	1.82652e-17	Up-regulated
CALCRL	Pig	8.93729e-22	2.76654	354	121	3.26613e-17	Up-regulated
SLFN11	Pig	1.27461e-21	6.77288	0.21	5	4.65805e-17	Up-regulated
MAML2	Human	1.52702e-21	2.83444	284	58	5.58048e-17	Up-regulated
VAV3	Pig	1.77744e-21	2.26369	375	136	6.49565e-17	Up-regulated
FOXP2	Pig	4.1e-21	1.35082	0.65	0.48	1.49834e-16	Up-regulated
NOVA1	Pig	5.9563e-21	1.39062	671	538	2.17673e-16	Up-regulated
FIGN	Pig	8.01706e-21	2.23475	413	184	2.92984e-16	Up-regulated
ARMC2	Pig	1.17707e-20	2.44944	387	165	4.30161e-16	Up-regulated
GPM6B	Pig	2.05778e-20	1.06366	0.62	378	7.52015e-16	Up-regulated
GPCPD1	Pig	7.463e-20	1.73918	506	318	2.72735e-15	Up-regulated
DTX3L	Pig	1.20104e-19	4.29746	227	29	4.38922e-15	Up-regulated
MFAP5	Pig	1.52192e-19	1.74132	475	273	5.56186e-15	Up-regulated
CNTN3	Pig	1.56543e-19	2.20423	387	165	5.72087e-15	Up-regulated
GPC6	Pig	1.92035e-19	0.699203	896	848	7.01793e-15	Up-regulated
ZC3HAV1	Pig	2.25885e-19	2.30021	355	136	8.25496e-15	Up-regulated
ENSSSCG00000014565	Pig	4.43649e-19	3.0077	266	0.06	1.62132e-14	Up-regulated
WDR17	Pig	4.74092e-19	2.2426	0.33	0.11	1.73257e-14	Up-regulated
DCN	Pig	5.46003e-19	0.998848	715	609	1.99537e-14	Up-regulated
SYBU	Pig	7.45385e-19	4.79834	196	0.01	2.72401e-14	Up-regulated
FAM214A	Pig	8.0971e-19	1.10331	603	402	2.95908e-14	Up-regulated
PDK4	Pig	1.36933e-18	5.48145	199	16	5.00423e-14	Up-regulated
GLUL	Pig	1.41091e-18	2.56441	292	79	5.15617e-14	Up-regulated
ENSSSCG00000009672	Pig	1.94963e-18	2.94288	244	42	7.12492e-14	Up-regulated
ZNF366	Pig	2.06119e-18	2.32399	331	118	7.53262e-14	Up-regulated
AKT3	Pig	2.79065e-18	0.771172	811	743	1.01984e-13	Up-regulated
NFKBIZ	Pig	3.22378e-18	0.777266	788	682	1.17813e-13	Up-regulated
PLSCR1	Pig	3.38701e-18	1.81131	446	255	1.23778e-13	Up-regulated
SAMD9	Pig	4.77982e-18	2.40936	294	87	1.74678e-13	Up-regulated
ENSSSCG00000009240	Pig	1.04635e-17	4.64308	193	16	3.82388e-13	Up-regulated
SOX6	Pig	1.18862e-17	2.12199	0.36	0.16	4.3438e-13	Up-regulated
ZFPM2	Pig	1.29992e-17	0.618376	889	827	4.75055e-13	Up-regulated
PPP1R21	Pig	1.76883e-17	1.39752	553	402	6.46418e-13	Up-regulated
TGFBR2	Pig	1.89712e-17	1.12017	649	0.52	6.93303e-13	Up-regulated
ETV1	Pig	4.50889e-17	1.45819	498	315	1.64777e-12	Up-regulated
LAMC1	Pig	5.00657e-17	0.680383	839	829	1.82965e-12	Up-regulated
ATRNL1	Pig	6.6267e-17	1.02492	671	514	2.42173e-12	Up-regulated
IFIT5	Pig	8.36726e-17	2.94284	246	0.06	3.05782e-12	Up-regulated
PLEKHA7	Pig	5.24762e-16	3.7877	197	29	1.91774e-11	Up-regulated
KCTD16	Pig	5.90251e-16	1.83205	398	197	2.15707e-11	Up-regulated
ABCA8	Pig	8.46534e-16	2.62447	265	81	3.09366e-11	Up-regulated
ENSSSCG00000017754	Pig	1.03393e-15	4.4558	189	26	3.77851e-11	Up-regulated
FMO1	Pig	1.08037e-15	1.99765	318	118	3.94822e-11	Up-regulated
IGF1	Pig	1.11363e-15	1.27135	549	365	4.06978e-11	Up-regulated
ENSSSCG00000001341	Pig	1.27428e-15	1.6331	381	192	4.65684e-11	Up-regulated
SELENOP	Pig	1.6746e-15	2.18187	326	134	6.11982e-11	Up-regulated
SESTD1	Pig	1.71625e-15	1.1781	647	562	6.27203e-11	Up-regulated
DNAJC13	Pig	1.73713e-15	1.28881	553	407	6.34834e-11	Up-regulated
ADAMTS5	Pig	2.40835e-15	1.02325	506	304	8.80131e-11	Up-regulated
CD36	Pig	2.52671e-15	3.27657	204	37	9.23386e-11	Up-regulated
ENSSSCG00000038187	Pig	3.03386e-15	1.79761	418	234	1.10872e-10	Up-regulated
LHFPL6	Pig	3.34638e-15	1.03273	712	633	1.22294e-10	Up-regulated
HIVEP1	Pig	4.28806e-15	1.30804	496	312	1.56707e-10	Up-regulated
REEP3	Pig	4.88921e-15	0.929161	694	604	1.78676e-10	Up-regulated
CUBN	Pig	5.71973e-15	1.93287	372	189	2.09027e-10	Up-regulated
PARP9	Pig	5.72735e-15	4.04818	165	13	2.09306e-10	Up-regulated
DMD	Pig	6.18697e-15	1.40972	441	273	2.26103e-10	Up-regulated
CCND3	Pig	7.32004e-15	0.781884	835	751	2.67511e-10	Up-regulated
AFF1	Pig	2.27281e-14	1.05288	659	554	8.30599e-10	Up-regulated
IL1RAP	Pig	2.47206e-14	1.47236	404	0.22	9.03413e-10	Up-regulated
RIMS1	Pig	2.4794e-14	6.96867	145	5	9.06097e-10	Up-regulated
CYBRD1	Pig	2.5618e-14	1.75409	0.4	215	9.36208e-10	Up-regulated
ATAD1	Pig	6.72625e-14	1.10689	542	425	2.45811e-09	Up-regulated
NFIB	Pig	7.39556e-14	0.649593	789	722	2.70271e-09	Up-regulated
NR3C2	Pig	9.16776e-14	2.2789	275	108	3.35036e-09	Up-regulated
CEBPD	Pig	1.08189e-13	2.31122	272	105	3.95376e-09	Up-regulated
DAPK1	Pig	1.39195e-13	1.78175	409	234	5.08689e-09	Up-regulated
MFAP4	Pig	1.44841e-13	2.66363	273	0.11	5.29323e-09	Up-regulated
WASF3	Pig	1.72383e-13	1.04231	623	509	6.29972e-09	Up-regulated
ENSSSCG00000014672	Pig	2.28034e-13	4.80176	137	5	8.33352e-09	Up-regulated
AGTR1	Pig	3.69277e-13	2.7229	235	76	1.34952e-08	Up-regulated
ANGPT1	Pig	3.90287e-13	2.7397	213	58	1.4263e-08	Up-regulated
UBE2H	Pig	7.53917e-13	1.11567	626	551	2.75519e-08	Up-regulated
ABCA9	Pig	7.87108e-13	2.46659	243	84	2.87648e-08	Up-regulated
ECM2	Pig	1.03819e-12	1.81747	343	181	3.79408e-08	Up-regulated
ENSSSCG00000037509	Pig	1.04481e-12	7.29396	0.12	0	3.81824e-08	Up-regulated
ANTXR2	Pig	1.35428e-12	0.88037	714	664	4.94923e-08	Up-regulated
ARHGAP10	Pig	1.40559e-12	0.697523	776	738	5.13671e-08	Up-regulated
PELI1	Pig	1.8406e-12	1.18281	561	467	6.72646e-08	Up-regulated
PI16	Pig	1.86818e-12	1.95406	213	0.06	6.82728e-08	Up-regulated
ACOT9	Pig	2.08441e-12	2.23642	351	205	7.61747e-08	Up-regulated
MITF	Pig	2.3192e-12	0.916697	652	0.53	8.47552e-08	Up-regulated
THBS4	Pig	2.5155e-12	0.998396	474	312	9.19289e-08	Up-regulated
HPGD	Pig	2.54061e-12	3.30927	192	0.05	9.28467e-08	Up-regulated
ACSL3	Pig	2.85442e-12	2.05874	324	171	1.04315e-07	Up-regulated
RNASE4	Pig	2.97197e-12	1.68343	305	139	1.08611e-07	Up-regulated
MATN2	Pig	3.06012e-12	2.18261	249	92	1.11832e-07	Up-regulated
ITGB5	Pig	3.26123e-12	1.70239	404	249	1.19182e-07	Up-regulated
CLIP1	Pig	4.98967e-12	0.793216	644	535	1.82347e-07	Up-regulated
PDE4B	Pig	5.34727e-12	1.53003	0.54	0.43	1.95416e-07	Up-regulated
PTPRD	Pig	5.60472e-12	3.35874	172	37	2.04824e-07	Up-regulated
GTPBP8	Pig	7.65927e-12	2.34019	316	165	2.79908e-07	Up-regulated
KLF9	Pig	8.94534e-12	1.31	427	283	3.26907e-07	Up-regulated
CNNM2	Pig	9.94376e-12	2.54203	202	58	3.63395e-07	Up-regulated
ENSSSCG00000043817	Pig	1.11552e-11	1.58077	396	241	4.07667e-07	Up-regulated
SERPING1	Pig	1.23961e-11	2.16173	268	115	4.53017e-07	Up-regulated
FBLN1	Pig	1.54261e-11	1.28747	371	205	5.63748e-07	Up-regulated
FOXS1	Pig	1.94523e-11	5.86082	113	3	7.10883e-07	Up-regulated
GBE1	Pig	1.95515e-11	0.514429	723	601	7.1451e-07	Up-regulated
PTPRK	Pig	2.24373e-11	1.46015	438	304	8.1997e-07	Up-regulated
CHD9	Pig	2.37906e-11	0.649455	787	743	8.69428e-07	Up-regulated
RNF19A	Pig	2.43947e-11	0.95637	0.58	488	8.91504e-07	Up-regulated
ADAMTS9	Pig	3.14548e-11	1.25848	449	307	1.14952e-06	Up-regulated
LGALS8	Pig	3.53281e-11	1.62457	311	157	1.29107e-06	Up-regulated
TASP1	Pig	3.6579e-11	0.760332	0.67	598	1.33678e-06	Up-regulated
CLU	Pig	3.8074e-11	1.15189	383	223	1.39141e-06	Up-regulated
AGMO	Pig	4.17241e-11	1.97862	269	118	1.52481e-06	Up-regulated
SH3D19	Pig	4.35723e-11	0.699632	735	696	1.59235e-06	Up-regulated
LAMP2	Pig	5.31104e-11	1.78901	275	126	1.94092e-06	Up-regulated
ENSSSCG00000006418	Pig	5.35472e-11	5.08473	113	5	1.95688e-06	Up-regulated
NPAS3	Pig	5.38495e-11	1.40442	325	165	1.96793e-06	Up-regulated
ENSSSCG00000017791	Pig	5.5138e-11	1.67084	0.33	176	2.01502e-06	Up-regulated
NBN	Pig	6.8457e-11	1.14821	0.56	459	2.50176e-06	Up-regulated
GAREM1	Pig	7.52716e-11	1.02803	535	425	2.7508e-06	Up-regulated
TRMT9B	Pig	8.60643e-11	6.11669	106	3	3.14522e-06	Up-regulated
ENSSSCG00000012178	Pig	8.67829e-11	5.01	111	5	3.17148e-06	Up-regulated
ENSSSCG00000014997	Pig	9.96343e-11	1.66108	343	197	3.64114e-06	Up-regulated
NEGR1	Pig	1.11667e-10	4.19757	181	55	4.08089e-06	Up-regulated
MTR	Pig	1.26e-10	1.63823	382	247	4.60468e-06	Up-regulated
PSMF1	Pig	1.46345e-10	2.07671	234	97	5.34819e-06	Up-regulated
ARAP2	Pig	1.7065e-10	1.90697	308	171	6.23641e-06	Up-regulated
LGALS1	Pig	2.05973e-10	1.78333	285	144	7.52727e-06	Up-regulated
MGMT	Pig	2.133e-10	0.744751	621	507	7.79504e-06	Up-regulated
H3-5	Pig	2.49169e-10	1.86697	0.26	121	9.10587e-06	Up-regulated
ERBB4	Pig	3.38926e-10	5.58735	114	0.01	1.2386e-05	Up-regulated
IKZF2	Pig	3.42467e-10	2.58342	209	79	1.25155e-05	Up-regulated
PAPPA	Pig	3.66983e-10	0.609226	709	633	1.34114e-05	Up-regulated
PBX1	Pig	3.67249e-10	0.624135	775	706	1.34211e-05	Up-regulated
S100A6	Pig	3.77627e-10	1.62628	256	113	1.38004e-05	Up-regulated
PLSCR4	Pig	4.07966e-10	0.67202	0.72	719	1.49091e-05	Up-regulated
ASPN	Pig	5.38292e-10	1.53745	319	178	1.96719e-05	Up-regulated
MORC3	Pig	5.5017e-10	1.38966	307	168	2.0106e-05	Up-regulated
SDK1	Pig	6.11199e-10	1.45293	289	139	2.23363e-05	Up-regulated
GNAO1	Pig	6.19933e-10	3.51027	125	18	2.26554e-05	Up-regulated
ETV7	Pig	7.41635e-10	5.39375	102	5	2.7103e-05	Up-regulated
SCARB2	Pig	7.63962e-10	1.85113	293	0.16	2.7919e-05	Up-regulated
ENSSSCG00000038249	Pig	8.47819e-10	6.99636	92	0	3.09835e-05	Up-regulated
CCN2	Pig	9.81391e-10	1.34552	384	239	3.5865e-05	Up-regulated
TP53INP1	Pig	1.22041e-09	1.76612	237	105	4.45999e-05	Up-regulated
TNRC6B	Pig	1.24496e-09	0.657566	724	677	4.54969e-05	Up-regulated
CADM2	Pig	1.29857e-09	3.28909	138	29	4.74563e-05	Up-regulated
ADAR	Pig	1.49347e-09	1.69847	234	102	5.4579e-05	Up-regulated
NIBAN1	Pig	1.83178e-09	1.71227	0.27	134	6.69423e-05	Up-regulated
NR1D2	Pig	1.87079e-09	1.80844	241	0.11	6.83681e-05	Up-regulated
PDE3B	Pig	1.94037e-09	2.18183	292	165	7.09107e-05	Up-regulated
CAT	Pig	2.03235e-09	2.71214	192	71	7.42721e-05	Up-regulated
SERPINE2	Pig	2.23589e-09	0.807658	397	249	8.17104e-05	Up-regulated
CCDC180	Pig	2.27827e-09	2.10193	217	92	8.32595e-05	Up-regulated
ENPEP	Pig	2.51443e-09	2.24077	185	63	9.18898e-05	Up-regulated
ENSSSCG00000048263	Pig	3.33104e-09	0.994043	559	467	0.000121733	Up-regulated
CILP	Pig	4.09189e-09	2.08464	225	97	0.000149538	Up-regulated
N4BP1	Pig	4.2734e-09	1.5857	318	189	0.000156171	Up-regulated
PREX2	Pig	4.71334e-09	1.94263	268	139	0.000172249	Up-regulated
ENPP1	Pig	5.3877e-09	0.943508	538	423	0.000196894	Up-regulated
LRMDA	Pig	5.93423e-09	0.794597	561	423	0.000216866	Up-regulated
DHX58	Pig	6.86564e-09	7.01187	82	0	0.000250905	Up-regulated
ENDOV	Pig	7.30861e-09	1.84841	193	76	0.000267093	Up-regulated
LGR4	Pig	8.8337e-09	1.96841	289	168	0.000322828	Up-regulated
STOX2	Pig	1.03582e-08	3.29623	159	52	0.000378539	Up-regulated
ASB9	Pig	1.0876e-08	6.00325	94	8	0.000397462	Up-regulated
SRGN	Pig	1.09389e-08	3.16183	0.11	16	0.000399761	Up-regulated
ABCA1	Pig	1.14349e-08	1.64063	275	0.15	0.000417888	Up-regulated
BCAS3	Pig	1.42838e-08	0.756211	0.61	522	0.000522	Up-regulated
ENSSSCG00000027124	Pig	1.50163e-08	3.0352	124	26	0.000548772	Up-regulated
SAMHD1	Pig	2.23341e-08	1.26356	419	307	0.000816201	Up-regulated
DDX17	Pig	2.23706e-08	0.681771	639	606	0.000817533	Up-regulated
FAM13B	Pig	2.27707e-08	1.1475	505	425	0.000832155	Up-regulated
PRELP	Pig	2.92649e-08	2.01579	196	84	0.00106949	Up-regulated
GPX3	Pig	3.00705e-08	1.81721	178	66	0.00109893	Up-regulated
EFNA5	Pig	3.12364e-08	0.871336	564	0.48	0.00114154	Up-regulated
FMO4	Pig	3.33634e-08	1.38942	355	231	0.00121926	Up-regulated
ID3	Pig	3.65479e-08	3.52885	0.09	8	0.00133564	Up-regulated
LRP6	Pig	4.08317e-08	0.826309	686	701	0.0014922	Up-regulated
PLPP4	Pig	5.69643e-08	1.40419	258	136	0.00208176	Up-regulated
GK5	Pig	5.91275e-08	1.19408	459	362	0.00216081	Up-regulated
CREBRF	Pig	6.04156e-08	1.23288	321	202	0.00220789	Up-regulated
FBXL20	Pig	7.67127e-08	0.875678	575	504	0.00280347	Up-regulated
ALDH1A1	Pig	7.68379e-08	2.41243	151	0.05	0.00280804	Up-regulated
CCDC141	Pig	7.85755e-08	1.0061	0.49	404	0.00287154	Up-regulated
C4A	Pig	8.07195e-08	2.23151	113	24	0.0029499	Up-regulated
NMI	Pig	9.80096e-08	2.25233	175	71	0.00358176	Up-regulated
IRF7	Pig	1.06452e-07	4.79173	84	8	0.00389029	Up-regulated
GPR155	Pig	1.10066e-07	1.33909	355	252	0.00402236	Up-regulated
MYLIP	Pig	1.10535e-07	2.38216	153	52	0.00403951	Up-regulated
CD81	Pig	1.31693e-07	1.37094	331	223	0.00481273	Up-regulated
PLAC9	Pig	1.33064e-07	1.35494	303	192	0.00486282	Up-regulated
SLC44A1	Pig	1.35901e-07	0.861415	569	514	0.00496651	Up-regulated
PLAG1	Pig	1.36523e-07	1.60382	317	213	0.00498922	Up-regulated
RFTN2	Pig	1.41184e-07	1.16554	324	202	0.00515957	Up-regulated
SNX7	Pig	1.41416e-07	1.18825	464	375	0.00516804	Up-regulated
MTUS1	Pig	1.47471e-07	1.82844	214	102	0.00538934	Up-regulated
GALNT10	Pig	1.54792e-07	0.979203	504	409	0.00565686	Up-regulated
ENSSSCG00000039249	Pig	1.6764e-07	2.07647	172	71	0.00612642	Up-regulated
GAB1	Pig	1.78326e-07	1.04033	448	339	0.00651694	Up-regulated
GPR63	Pig	1.81987e-07	2.25531	148	52	0.00665073	Up-regulated
CD34	Pig	1.89086e-07	2.20855	157	58	0.00691014	Up-regulated
MAGI1	Pig	1.96868e-07	0.579628	664	604	0.00719455	Up-regulated
PELI2	Pig	1.97812e-07	0.856765	529	436	0.00722903	Up-regulated
GPC5	Pig	2.06091e-07	2.73438	105	21	0.00753161	Up-regulated
LUM	Pig	2.07308e-07	1.57299	326	0.22	0.00757606	Up-regulated
C2CD5	Pig	2.15853e-07	1.27647	353	252	0.00788835	Up-regulated
PCOLCE	Pig	2.2737e-07	1.8136	265	157	0.00830922	Up-regulated
SLIT3	Pig	2.30187e-07	1.57576	249	134	0.00841219	Up-regulated
MEDAG	Pig	2.48325e-07	1.79143	196	89	0.00907502	Up-regulated
SOBP	Pig	2.97655e-07	0.943743	564	0.53	0.0108778	Up-regulated
NOL11	Pig	3.14937e-07	0.892319	607	556	0.0115094	Up-regulated
TMEM135	Pig	3.35264e-07	0.642527	0.68	648	0.0122522	Up-regulated
DLG2	Pig	3.57537e-07	1.2416	417	315	0.0130662	Up-regulated
LIMCH1	Pig	3.58671e-07	1.12104	359	247	0.0131076	Up-regulated
TBC1D32	Pig	4.24143e-07	1.08906	335	226	0.0155003	Up-regulated
PPL	Pig	4.30031e-07	1.94263	114	29	0.0157155	Up-regulated
FUT8	Pig	4.45344e-07	0.683296	542	462	0.0162751	Up-regulated
ZMAT3	Pig	4.81282e-07	1.51547	244	139	0.0175884	Up-regulated
LDLRAD4	Pig	6.04463e-07	1.29672	331	0.22	0.0220901	Up-regulated
ABCD4	Pig	6.20021e-07	1.97148	153	58	0.0226587	Up-regulated
AKAP12	Pig	6.68714e-07	1.10147	278	163	0.0244382	Up-regulated
C8orf34	Pig	7.1508e-07	1.75485	209	105	0.0261326	Up-regulated
PRDM6	Pig	7.22928e-07	1.79411	149	55	0.0264194	Up-regulated
NRXN1	Pig	7.24256e-07	1.35023	207	0.1	0.0264679	Up-regulated
CCDC170	Pig	7.75939e-07	1.75261	206	102	0.0283567	Up-regulated
ANKRD46	Pig	7.79906e-07	1.49399	281	173	0.0285017	Up-regulated
NT5C2	Pig	8.09443e-07	0.685338	614	591	0.0295811	Up-regulated
DOCK4	Pig	8.46944e-07	2.1269	213	115	0.0309516	Up-regulated
TFDP2	Pig	8.62088e-07	0.887504	487	412	0.031505	Up-regulated
TGFB2	Pig	8.88572e-07	0.933205	0.4	291	0.0324729	Up-regulated
MDM2	Pig	8.99608e-07	0.862274	427	339	0.0328762	Up-regulated
ITGA8	Pig	1.01116e-06	0.904893	569	517	0.036953	Up-regulated
SLC22A15	Pig	1.01198e-06	1.85598	251	152	0.0369828	Up-regulated
TRHDE	Pig	1.114e-06	2.49096	123	39	0.0407111	Up-regulated
NKAIN3	Pig	1.22502e-06	1.00492	385	268	0.0447685	Up-regulated
EPB41L2	Pig	1.22665e-06	0.625019	704	711	0.0448281	Up-regulated
ANKRD12	Pig	1.24782e-06	0.538154	714	675	0.0456014	Up-regulated
FBLN5	Pig	1.29694e-06	1.45748	271	168	0.0473965	Up-regulated
ADAM12	Pig	9.5392e-118	-2.18573	594	948	3.4861e-113	Down-regulated
IL33	Pig	9.4366e-113	-2.86947	103	591	3.44861e-108	Down-regulated
ROR2	Pig	1.77629e-108	-2.61424	328	827	6.49144e-104	Down-regulated
KIF26B	Pig	7.85087e-93	-3.71721	105	525	2.8691e-88	Down-regulated
RPL31	Pig	2.19272e-92	-2.50748	284	743	8.01329e-88	Down-regulated
TPM1	Pig	5.85176e-90	-2.12264	407	827	2.13853e-85	Down-regulated
FLNB	Pig	6.76191e-87	-5.08501	31	333	2.47114e-82	Down-regulated
COL18A1	Pig	3.40298e-84	-4.06705	34	339	1.24362e-79	Down-regulated
IGFBP2	Pig	1.62145e-76	-3.68627	47	357	5.92559e-72	Down-regulated
FAM78B	Pig	1.71836e-76	-2.70884	231	651	6.27974e-72	Down-regulated
GAS7	Pig	8.21594e-76	-1.9367	407	819	3.00252e-71	Down-regulated
TRABD2B	Pig	1.40492e-74	-3.56961	28	297	5.13428e-70	Down-regulated
ENSSSCG00000000145	Pig	8.03026e-74	-2.17787	276	706	2.93466e-69	Down-regulated
VEGFC	Pig	8.54133e-73	-3.41759	69	402	3.12143e-68	Down-regulated
COL5A1	Pig	4.95381e-71	-1.78781	405	798	1.81037e-66	Down-regulated
NRP1	Pig	1.06337e-70	-2.371	277	685	3.88609e-66	Down-regulated
ARNTL2	Pig	2.9822e-69	-2.19901	145	546	1.08984e-64	Down-regulated
RCAN2	Pig	3.82124e-65	-5.52534	3	171	1.39647e-60	Down-regulated
DPYSL3	Pig	4.06834e-65	-1.95847	238	656	1.48677e-60	Down-regulated
KCNK2	Pig	6.72227e-65	-2.7265	107	454	2.45666e-60	Down-regulated
ENSSSCG00000011489	Pig	4.27491e-62	-3.80724	15	0.22	1.56226e-57	Down-regulated
TEX14	Pig	4.72285e-60	-1.80733	217	0.63	1.72597e-55	Down-regulated
FN1	Pig	4.25292e-58	-1.69481	793	934	1.55423e-53	Down-regulated
NEBL	Pig	4.82461e-58	-3.99879	13	199	1.76315e-53	Down-regulated
BMPR1B	Pig	6.39462e-56	-2.53978	104	0.42	2.33691e-51	Down-regulated
EXT1	Pig	1.65193e-55	-1.21712	785	932	6.03697e-51	Down-regulated
WFDC1	Pig	1.76196e-55	-3.20417	36	0.27	6.43907e-51	Down-regulated
DUSP10	Pig	5.5977e-55	-2.60279	29	249	2.04568e-50	Down-regulated
PALM2AKAP2	Pig	2.09837e-54	-2.32299	179	528	7.6685e-50	Down-regulated
CA12	Pig	3.76873e-54	-2.24841	124	449	1.37728e-49	Down-regulated
CHST11	Pig	5.89401e-54	-1.92545	271	646	2.15397e-49	Down-regulated
THBS1	Pig	3.47143e-53	-2.02498	382	0.73	1.26863e-48	Down-regulated
GPR39	Pig	5.58129e-53	-2.39324	108	0.42	2.03968e-48	Down-regulated
MTCL1	Pig	1.13819e-52	-3.1438	21	218	4.15952e-48	Down-regulated
PDE1C	Pig	6.82511e-52	-3.30817	54	304	2.49424e-47	Down-regulated
CYTB	Pig	7.2407e-52	-2.11018	52	307	2.64611e-47	Down-regulated
ELK3	Pig	4.35265e-50	-2.29853	0.09	381	1.59068e-45	Down-regulated
ENSSSCG00000022925	Pig	1.04143e-49	-2.40992	95	386	3.80592e-45	Down-regulated
MALT1	Pig	3.25941e-49	-3.085	33	244	1.19115e-44	Down-regulated
ERG	Pig	5.02695e-49	-1.45411	242	617	1.8371e-44	Down-regulated
ADAMTSL3	Pig	1.25933e-48	-1.94902	219	564	4.60221e-44	Down-regulated
CDK6	Pig	1.65481e-48	-1.62672	442	748	6.04749e-44	Down-regulated
SNAP25	Pig	8.68086e-48	-2.62638	0.02	202	3.17242e-43	Down-regulated
ERRFI1	Pig	2.33588e-47	-2.82096	78	339	8.53648e-43	Down-regulated
KCNK12	Pig	7.1983e-47	-2.0581	44	0.27	2.63062e-42	Down-regulated
NID2	Pig	7.94597e-47	-2.76341	43	262	2.90385e-42	Down-regulated
NXN	Pig	9.77944e-47	-1.52836	326	0.68	3.5739e-42	Down-regulated
STK17A	Pig	2.68199e-46	-2.3028	77	341	9.80132e-42	Down-regulated
ENSSSCG00000002950	Pig	3.3556e-46	-1.7164	234	593	1.2263e-41	Down-regulated
ANO4	Pig	3.98571e-46	-2.1353	55	291	1.45658e-41	Down-regulated
LMNB1	Pig	4.08993e-45	-2.80264	42	255	1.49467e-40	Down-regulated
SH3GL3	Pig	1.33687e-44	-2.61904	24	205	4.88559e-40	Down-regulated
RHOA	Pig	4.43802e-44	-1.25503	495	811	1.62187e-39	Down-regulated
ENSSSCG00000033786	Pig	2.65925e-43	-2.15368	153	457	9.71823e-39	Down-regulated
ENAH	Pig	3.79889e-43	-1.88589	0.25	583	1.3883e-38	Down-regulated
DDAH1	Pig	4.48274e-43	-2.14331	126	417	1.63822e-38	Down-regulated
RGS17	Pig	5.15624e-43	-2.68184	49	265	1.88435e-38	Down-regulated
PCDH7	Pig	7.79119e-43	-7.5992	1	108	2.84729e-38	Down-regulated
NR6A1	Pig	1.77841e-42	-1.59259	229	567	6.49919e-38	Down-regulated
HK2	Pig	3.74761e-42	-2.18256	62	297	1.36956e-37	Down-regulated
NEDD4L	Pig	4.70459e-42	-3.4407	26	202	1.71929e-37	Down-regulated
EPHA4	Pig	4.87354e-42	-4.91478	4	123	1.78103e-37	Down-regulated
VEGFA	Pig	3.53587e-41	-2.93083	45	249	1.29218e-36	Down-regulated
ENSSSCG00000029160	Pig	6.46766e-41	-1.97878	105	375	2.36361e-36	Down-regulated
KCNQ5	Pig	2.38965e-40	-1.54556	0.19	507	8.73299e-36	Down-regulated
KITLG	Pig	3.93212e-40	-1.81886	128	409	1.43699e-35	Down-regulated
EPB41L3	Pig	1.00049e-39	-2.98522	24	189	3.65628e-35	Down-regulated
PKDCC	Pig	2.13055e-39	-1.39507	208	538	7.7861e-35	Down-regulated
ARHGAP31	Pig	2.16768e-39	-1.76518	156	457	7.92177e-35	Down-regulated
VCL	Pig	2.54675e-39	-1.53511	451	738	9.30709e-35	Down-regulated
LOXL2	Pig	2.91987e-39	-1.57719	314	633	1.06707e-34	Down-regulated
BCAT1	Pig	2.96269e-38	-1.49352	154	451	1.08271e-33	Down-regulated
ENSSSCG00000039222	Pig	2.05767e-37	-1.98582	75	307	7.51976e-33	Down-regulated
ARL4C	Pig	2.28776e-37	-3.28744	9	131	8.36061e-33	Down-regulated
UCK2	Pig	5.36539e-37	-2.14472	114	0.37	1.96078e-32	Down-regulated
GAPDH	Pig	7.79246e-37	-1.82889	0.06	273	2.84775e-32	Down-regulated
PTGER2	Pig	8.03338e-37	-2.71909	38	218	2.9358e-32	Down-regulated
MTSS1	Pig	8.33188e-37	-2.36479	63	276	3.04489e-32	Down-regulated
TMEM26	Pig	1.80945e-36	-3.20434	42	226	6.61265e-32	Down-regulated
ENSSSCG00000038144	Pig	5.0265e-36	-1.19763	409	722	1.83694e-31	Down-regulated
TNS1	Pig	7.38035e-36	-0.952296	627	877	2.69715e-31	Down-regulated
COL6A2	Pig	7.69797e-36	-1.24642	305	0.63	2.81322e-31	Down-regulated
TMEM65	Pig	5.45071e-35	-1.52986	266	572	1.99196e-30	Down-regulated
PRKAR2B	Pig	9.0133e-35	-1.84065	47	236	3.29391e-30	Down-regulated
DAB1	Pig	2.14609e-34	-3.28918	16	0.15	7.84288e-30	Down-regulated
SMG6	Pig	2.72183e-34	-1.10196	383	682	9.94692e-30	Down-regulated
IGF2BP2	Pig	5.66137e-34	-1.83759	185	457	2.06895e-29	Down-regulated
FARP1	Pig	5.90207e-34	-1.0028	705	885	2.15691e-29	Down-regulated
LSAMP	Pig	6.32351e-34	-3.23311	41	215	2.31093e-29	Down-regulated
LRCH1	Pig	7.48603e-34	-1.3934	228	0.53	2.73577e-29	Down-regulated
PAWR	Pig	3.09363e-33	-1.63065	86	312	1.13057e-28	Down-regulated
ST3GAL3	Pig	3.46746e-33	-1.63182	0.17	451	1.26718e-28	Down-regulated
ITGB3	Pig	3.8521e-33	-1.65506	59	257	1.40775e-28	Down-regulated
DIAPH3	Pig	1.01738e-32	-3.60429	21	157	3.71803e-28	Down-regulated
KIRREL1	Pig	1.16484e-32	-1.06241	326	643	4.25692e-28	Down-regulated
ENSSSCG00000015645	Pig	1.74679e-32	-1.10861	263	575	6.38366e-28	Down-regulated
TPM2	Pig	4.09393e-32	-2.93708	0.01	123	1.49613e-27	Down-regulated
CMIP	Pig	4.35846e-32	-1.36387	178	462	1.5928e-27	Down-regulated
FAM171A1	Pig	4.91589e-32	-1.00916	634	835	1.79651e-27	Down-regulated
MTBP	Pig	8.7547e-32	-3.36294	12	129	3.19941e-27	Down-regulated
P2RY6	Pig	1.74779e-31	-5.0539	4	97	6.3873e-27	Down-regulated
CDH11	Pig	2.23232e-31	-0.776265	843	945	8.15802e-27	Down-regulated
RAI14	Pig	2.92227e-31	-0.984583	671	885	1.06794e-26	Down-regulated
APBB2	Pig	3.17097e-31	-0.711356	833	953	1.15883e-26	Down-regulated
ZC3HAV1L	Pig	4.17518e-31	-2.25058	29	178	1.52582e-26	Down-regulated
ITGB1	Pig	6.20454e-31	-1.03014	0.58	801	2.26745e-26	Down-regulated
TICRR	Pig	7.16462e-31	-3.3386	7	108	2.61831e-26	Down-regulated
TIAM1	Pig	7.2338e-31	-1.68319	57	247	2.64359e-26	Down-regulated
RUNX2	Pig	1.73201e-30	-1.25081	482	735	6.32961e-26	Down-regulated
PDGFRA	Pig	2.05675e-30	-1.42083	441	711	7.51641e-26	Down-regulated
NIBAN2	Pig	2.29439e-30	-1.58193	75	281	8.38484e-26	Down-regulated
CYTH3	Pig	2.78734e-30	-1.09226	329	0.64	1.01863e-25	Down-regulated
EML1	Pig	3.01514e-30	-1.23497	196	483	1.10188e-25	Down-regulated
DOCK7	Pig	3.33836e-30	-1.08935	371	672	1.22e-25	Down-regulated
SEMA3A	Pig	4.21047e-30	-3.1179	24	0.16	1.53872e-25	Down-regulated
TMEM45A	Pig	9.98192e-30	-1.26248	0.27	562	3.64789e-25	Down-regulated
ATP1B1	Pig	1.08656e-29	-3.4505	13	126	3.97082e-25	Down-regulated
FAM168A	Pig	1.14593e-29	-1.19338	331	617	4.18782e-25	Down-regulated
PALLD	Pig	1.87502e-29	-1.19102	363	664	6.85225e-25	Down-regulated
NINL	Pig	2.51068e-29	-1.16798	0.14	391	9.1753e-25	Down-regulated
PAG1	Pig	3.44416e-29	-1.85975	104	0.32	1.25867e-24	Down-regulated
RASSF3	Pig	3.89619e-29	-1.57429	144	386	1.42386e-24	Down-regulated
ERC2	Pig	4.63238e-29	-3.12262	0.02	144	1.6929e-24	Down-regulated
NUAK1	Pig	7.38569e-29	-1.1364	0.29	0.58	2.6991e-24	Down-regulated
MTHFD1L	Pig	1.58454e-28	-1.12617	0.15	404	5.7907e-24	Down-regulated
ENSSSCG00000039259	Pig	1.6477e-28	-3.12571	16	134	6.02152e-24	Down-regulated
DGKI	Pig	1.98743e-28	-2.58695	58	236	7.26307e-24	Down-regulated
NT5DC1	Pig	2.46029e-28	-1.56124	135	367	8.99114e-24	Down-regulated
SLC2A5	Pig	2.67419e-28	-3.80992	4	89	9.77282e-24	Down-regulated
CDC42BPA	Pig	3.13057e-28	-0.811323	0.72	861	1.14407e-23	Down-regulated
TRIOBP	Pig	4.13175e-28	-1.81663	0.08	281	1.50995e-23	Down-regulated
ZC3H12C	Pig	4.45691e-28	-1.13469	315	598	1.62878e-23	Down-regulated
UNC5B	Pig	1.24365e-27	-2.83027	16	131	4.54494e-23	Down-regulated
NCAPG	Pig	1.30473e-27	-2.8667	9	108	4.76814e-23	Down-regulated
PLXNA4	Pig	1.85346e-27	-1.85739	477	685	6.77349e-23	Down-regulated
MAN2A1	Pig	4.83823e-27	-1.18249	347	612	1.76813e-22	Down-regulated
KNTC1	Pig	6.93252e-27	-3.09333	21	142	2.53349e-22	Down-regulated
KIF11	Pig	7.40779e-27	-4.0764	7	94	2.70718e-22	Down-regulated
PAPLN	Pig	9.40043e-27	-3.01242	13	118	3.43539e-22	Down-regulated
MBOAT2	Pig	1.02307e-26	-2.13542	0.06	231	3.7388e-22	Down-regulated
ENSSSCG00000035371	Pig	1.80781e-26	-2.22682	0.03	165	6.60665e-22	Down-regulated
ATP6	Pig	1.85594e-26	-0.951475	0.18	446	6.78254e-22	Down-regulated
SMURF1	Pig	2.19592e-26	-1.06944	349	619	8.02499e-22	Down-regulated
SH3PXD2B	Pig	2.88126e-26	-1.04228	271	546	1.05296e-21	Down-regulated
DCLK1	Pig	2.88596e-26	-1.16675	0.39	654	1.05468e-21	Down-regulated
BGN	Pig	7.15327e-26	-1.71071	75	0.26	2.61416e-21	Down-regulated
CCDC112	Pig	8.42009e-26	-6.81227	1	63	3.07712e-21	Down-regulated
CUX1	Pig	8.88593e-26	-0.971556	285	577	3.24736e-21	Down-regulated
NMT2	Pig	9.0285e-26	-1.40619	128	349	3.29946e-21	Down-regulated
RCOR1	Pig	9.33204e-26	-1.01616	338	614	3.4104e-21	Down-regulated
FRMD4A	Pig	1.02737e-25	-1.00693	338	617	3.75452e-21	Down-regulated
ADGRA3	Pig	1.17828e-25	-1.11191	235	507	4.30604e-21	Down-regulated
NSD2	Pig	1.32452e-25	-2.51505	23	144	4.84045e-21	Down-regulated
TRERF1	Pig	2.06865e-25	-1.05915	273	549	7.55988e-21	Down-regulated
SLC2A13	Pig	3.57455e-25	-0.877908	453	706	1.30632e-20	Down-regulated
MELK	Pig	4.1048e-25	-3.10399	8	94	1.5001e-20	Down-regulated
LHFPL2	Pig	4.16514e-25	-0.930148	427	677	1.52215e-20	Down-regulated
SUFU	Pig	4.54325e-25	-0.904705	308	601	1.66033e-20	Down-regulated
TPX2	Pig	4.58248e-25	-2.88123	11	108	1.67467e-20	Down-regulated
ENSSSCG00000012102	Pig	4.60121e-25	-1.10046	311	585	1.68151e-20	Down-regulated
SGCD	Pig	5.93055e-25	-1.86651	56	215	2.16732e-20	Down-regulated
UHRF2	Pig	6.90792e-25	-1.47739	239	496	2.5245e-20	Down-regulated
GMPS	Pig	7.22401e-25	-1.39012	162	402	2.64001e-20	Down-regulated
NAV1	Pig	1.0962e-24	-0.930674	316	601	4.00606e-20	Down-regulated
COX3	Pig	1.12861e-24	-0.747715	369	0.68	4.1245e-20	Down-regulated
ARNTL	Pig	1.14665e-24	-1.18564	149	375	4.19042e-20	Down-regulated
CENPF	Pig	1.19708e-24	-3.78232	0.01	102	4.37474e-20	Down-regulated
MAP4	Pig	1.29657e-24	-0.898033	536	766	4.73831e-20	Down-regulated
MAST2	Pig	1.36309e-24	-1.50544	193	428	4.98143e-20	Down-regulated
SEPTIN11	Pig	1.36418e-24	-1.16007	149	386	4.9854e-20	Down-regulated
ASAP1	Pig	1.93208e-24	-1.00312	422	675	7.0608e-20	Down-regulated
FYN	Pig	2.84695e-24	-1.02986	446	711	1.04042e-19	Down-regulated
ENSSSCG00000033750	Pig	3.25984e-24	-2.61941	36	171	1.19131e-19	Down-regulated
HEY2	Pig	3.39427e-24	-4.87555	3	73	1.24043e-19	Down-regulated
TES	Pig	3.43024e-24	-2.58213	18	126	1.25358e-19	Down-regulated
DGKD	Pig	5.17403e-24	-1.71819	89	281	1.89085e-19	Down-regulated
ADAM19	Pig	5.21803e-24	-1.50824	111	315	1.90693e-19	Down-regulated
MAP3K5	Pig	5.3377e-24	-1.64047	151	367	1.95066e-19	Down-regulated
EMILIN2	Pig	7.08248e-24	-2.66333	16	118	2.58829e-19	Down-regulated
ETS1	Pig	7.93729e-24	-1.38977	123	333	2.90068e-19	Down-regulated
TSPAN12	Pig	9.83066e-24	-3.81717	6	84	3.59261e-19	Down-regulated
POLE	Pig	1.22054e-23	-3.41678	6	84	4.46046e-19	Down-regulated
ACTN1	Pig	2.5588e-23	-0.800277	0.38	659	9.35115e-19	Down-regulated
RPS6KA3	Pig	2.7483e-23	-1.19859	248	496	1.00436e-18	Down-regulated
DEPDC1	Pig	3.9044e-23	-4.91313	3	71	1.42686e-18	Down-regulated
SLC20A2	Pig	3.95301e-23	-1.72199	195	0.42	1.44463e-18	Down-regulated
NOTCH1	Pig	4.35785e-23	-3.63188	7	87	1.59258e-18	Down-regulated
EZH2	Pig	4.45216e-23	-2.12732	37	168	1.62704e-18	Down-regulated
PDLIM7	Pig	7.87158e-23	-1.17825	198	444	2.87667e-18	Down-regulated
PDE8A	Pig	7.94207e-23	-0.99906	414	672	2.90243e-18	Down-regulated
ZFP36L1	Pig	1.19794e-22	-1.29034	137	352	4.37789e-18	Down-regulated
NDC80	Pig	1.26194e-22	-2.73491	6	81	4.61177e-18	Down-regulated
SLC7A1	Pig	1.35889e-22	-1.57563	36	168	4.96608e-18	Down-regulated
CIT	Pig	1.42993e-22	-3.09253	15	0.11	5.22568e-18	Down-regulated
SMAP2	Pig	2.00361e-22	-1.2241	93	278	7.32218e-18	Down-regulated
ENSSSCG00000004207	Pig	2.06033e-22	-1.28266	537	714	7.52949e-18	Down-regulated
ENSSSCG00000036812	Pig	2.06744e-22	-0.880483	197	441	7.55547e-18	Down-regulated
MRTFA	Pig	2.8374e-22	-0.835537	497	745	1.03693e-17	Down-regulated
KCNJ6	Pig	2.84119e-22	-5.69337	4	71	1.03831e-17	Down-regulated
RPN2	Pig	3.09785e-22	-1.52759	108	302	1.13211e-17	Down-regulated
COL27A1	Pig	4.58436e-22	-1.04435	154	373	1.67535e-17	Down-regulated
ZNF697	Pig	4.6997e-22	-1.62069	56	207	1.7175e-17	Down-regulated
ENSSSCG00000039009	Pig	4.84915e-22	-1.79213	0.07	231	1.77212e-17	Down-regulated
EVA1A	Pig	5.88363e-22	-1.47765	64	223	2.15017e-17	Down-regulated
MCM10	Pig	7.26429e-22	-2.20981	0.02	123	2.65474e-17	Down-regulated
ST6GAL1	Pig	8.08135e-22	-2.06364	18	118	2.95333e-17	Down-regulated
DNA2	Pig	8.24252e-22	-2.23353	28	144	3.01223e-17	Down-regulated
TFRC	Pig	9.92075e-22	-2.59285	21	126	3.62554e-17	Down-regulated
PHLDB2	Pig	1.0284e-21	-1.19364	0.19	425	3.75827e-17	Down-regulated
PDGFC	Pig	1.16866e-21	-1.23497	252	499	4.27088e-17	Down-regulated
TSPAN5	Pig	1.59113e-21	-1.48459	81	252	5.81478e-17	Down-regulated
SCARA3	Pig	1.59447e-21	-1.1314	135	341	5.82701e-17	Down-regulated
TOP2A	Pig	1.68422e-21	-2.88673	5	76	6.155e-17	Down-regulated
DNM1	Pig	1.9542e-21	-0.951461	253	507	7.14164e-17	Down-regulated
TEAD4	Pig	2.17046e-21	-2.04249	41	173	7.93196e-17	Down-regulated
PLA2R1	Pig	3.67487e-21	-1.71077	53	197	1.34298e-16	Down-regulated
MYBL2	Pig	3.80809e-21	-2.79085	7	81	1.39167e-16	Down-regulated
TMEM131L	Pig	3.82586e-21	-1.04659	173	399	1.39816e-16	Down-regulated
CXXC5	Pig	3.85344e-21	-1.50613	39	168	1.40824e-16	Down-regulated
DIRAS3	Pig	3.99702e-21	-5.02255	2	58	1.46071e-16	Down-regulated
GPR157	Pig	4.31602e-21	-3.0652	13	0.1	1.57729e-16	Down-regulated
LIMD1	Pig	4.50197e-21	-1.28916	169	391	1.64525e-16	Down-regulated
ND4	Pig	5.04293e-21	-1.39102	0.08	249	1.84294e-16	Down-regulated
CRIM1	Pig	5.53988e-21	-1.00739	268	517	2.02455e-16	Down-regulated
GRK5	Pig	6.14845e-21	-1.17256	0.26	493	2.24695e-16	Down-regulated
ENSSSCG00000032383	Pig	6.61096e-21	-0.774899	69	231	2.41597e-16	Down-regulated
ENSSSCG00000013366	Pig	7.86072e-21	-1.74554	77	241	2.8727e-16	Down-regulated
FAM102A	Pig	7.94721e-21	-1.19947	66	226	2.90431e-16	Down-regulated
NEDD9	Pig	8.79313e-21	-1.34789	231	454	3.21345e-16	Down-regulated
KIF15	Pig	9.48926e-21	-3.21733	8	84	3.46785e-16	Down-regulated
OLFML2A	Pig	9.89928e-21	-1.68454	39	165	3.61769e-16	Down-regulated
SLCO2A1	Pig	9.96949e-21	-2.94208	19	115	3.64335e-16	Down-regulated
DPYD	Pig	1.08683e-20	-0.753188	512	727	3.97183e-16	Down-regulated
ENSSSCG00000006231	Pig	1.14533e-20	-1.0744	133	339	4.18559e-16	Down-regulated
COX1	Pig	1.18772e-20	-1.16347	252	504	4.3405e-16	Down-regulated
SPC24	Pig	1.53014e-20	-3.36899	5	73	5.59188e-16	Down-regulated
EVI5	Pig	1.75158e-20	-1.03365	0.33	572	6.40113e-16	Down-regulated
SMAD9	Pig	1.86241e-20	-1.06566	146	357	6.80618e-16	Down-regulated
ADAMTS2	Pig	2.01094e-20	-0.928752	523	745	7.34898e-16	Down-regulated
ANLN	Pig	2.1221e-20	-2.50487	27	136	7.75523e-16	Down-regulated
INPP5A	Pig	2.40814e-20	-1.68204	87	255	8.80056e-16	Down-regulated
PKM	Pig	2.48291e-20	-1.18888	191	409	9.0738e-16	Down-regulated
PLAUR	Pig	2.55151e-20	-1.19884	57	202	9.32449e-16	Down-regulated
PREX1	Pig	2.60417e-20	-1.48219	64	215	9.51695e-16	Down-regulated
ZGRF1	Pig	2.84462e-20	-2.11534	13	97	1.03957e-15	Down-regulated
POLQ	Pig	3.60312e-20	-3.77164	9	84	1.31676e-15	Down-regulated
NPEPPS	Pig	4.1301e-20	-0.811951	371	622	1.50935e-15	Down-regulated
KIF4A	Pig	4.14479e-20	-2.63296	14	0.1	1.51471e-15	Down-regulated
BUB1	Pig	4.73707e-20	-3.99124	3	63	1.73116e-15	Down-regulated
NCAPH	Pig	4.90332e-20	-4.49755	2	55	1.79192e-15	Down-regulated
FSTL1	Pig	5.04464e-20	-0.698381	712	874	1.84356e-15	Down-regulated
SLC9A9	Pig	5.19124e-20	-1.01537	457	675	1.89714e-15	Down-regulated
DLGAP5	Pig	5.44939e-20	-3.15509	7	76	1.99148e-15	Down-regulated
ENO1	Pig	5.48947e-20	-1.14865	298	0.53	2.00613e-15	Down-regulated
GARS1	Pig	7.3033e-20	-1.24991	129	0.32	2.66899e-15	Down-regulated
TRIM37	Pig	8.61221e-20	-1.32741	114	299	3.14733e-15	Down-regulated
KDM4C	Pig	8.75457e-20	-0.766856	431	685	3.19936e-15	Down-regulated
DDB2	Pig	9.31162e-20	-1.36046	0.07	226	3.40293e-15	Down-regulated
TRAF3	Pig	1.13355e-19	-0.919976	214	441	4.14255e-15	Down-regulated
ST8SIA1	Pig	1.19768e-19	-1.11475	265	496	4.37691e-15	Down-regulated
NEXN	Pig	1.21813e-19	-1.57331	97	268	4.45166e-15	Down-regulated
TEAD1	Pig	1.22456e-19	-0.63429	681	0.85	4.47515e-15	Down-regulated
KSR1	Pig	1.24296e-19	-0.877873	312	559	4.54239e-15	Down-regulated
PTK7	Pig	1.29063e-19	-0.885423	0.18	399	4.71661e-15	Down-regulated
LAMB1	Pig	1.44168e-19	-0.724284	0.53	738	5.26861e-15	Down-regulated
CSPG4	Pig	1.56908e-19	-1.5168	57	199	5.7342e-15	Down-regulated
ENSSSCG00000014822	Pig	1.91215e-19	-1.27584	92	262	6.98794e-15	Down-regulated
GPI	Pig	2.49473e-19	-1.20181	204	0.42	9.11698e-15	Down-regulated
SBNO2	Pig	2.94582e-19	-1.06388	94	268	1.07655e-14	Down-regulated
JARID2	Pig	3.00054e-19	-1.24183	284	514	1.09655e-14	Down-regulated
SERPINE1	Pig	3.14522e-19	-1.56051	0.3	509	1.14942e-14	Down-regulated
OXSR1	Pig	3.49422e-19	-1.01525	184	407	1.27696e-14	Down-regulated
NCS1	Pig	3.87602e-19	-1.8496	22	121	1.41649e-14	Down-regulated
PRPF4B	Pig	3.90565e-19	-0.835733	486	743	1.42732e-14	Down-regulated
PCDH19	Pig	4.34116e-19	-1.05869	131	323	1.58648e-14	Down-regulated
NDRG1	Pig	4.4291e-19	-1.42061	0.21	423	1.61861e-14	Down-regulated
FAM20A	Pig	4.87619e-19	-6.02161	2	52	1.782e-14	Down-regulated
ACTA2	Pig	4.98453e-19	-1.27667	77	234	1.8216e-14	Down-regulated
ENSSSCG00000031269	Pig	5.17137e-19	-1.61316	78	236	1.88988e-14	Down-regulated
B4GALT6	Pig	5.54877e-19	-4.38371	2	55	2.0278e-14	Down-regulated
TK1	Pig	6.22658e-19	-2.21658	15	0.1	2.2755e-14	Down-regulated
MRC2	Pig	7.3046e-19	-0.751966	399	659	2.66947e-14	Down-regulated
IGF2R	Pig	8.57678e-19	-0.915842	185	409	3.13439e-14	Down-regulated
XPO6	Pig	9.1133e-19	-0.947141	256	488	3.33046e-14	Down-regulated
ENSSSCG00000001931	Pig	1.28845e-18	-3.01078	8	76	4.70866e-14	Down-regulated
MCM6	Pig	1.33909e-18	-1.62113	65	207	4.89371e-14	Down-regulated
SORBS2	Pig	1.43481e-18	-3.37873	11	87	5.2435e-14	Down-regulated
MSI2	Pig	1.64701e-18	-1.32518	234	444	6.01901e-14	Down-regulated
GSE1	Pig	1.75683e-18	-1.17213	156	354	6.42035e-14	Down-regulated
ENSSSCG00000023324	Pig	1.87645e-18	-0.931801	343	575	6.85749e-14	Down-regulated
ENSSSCG00000022032	Pig	2.01288e-18	-0.942224	267	501	7.35608e-14	Down-regulated
GJC1	Pig	2.06223e-18	-1.41146	51	181	7.53641e-14	Down-regulated
BZW2	Pig	2.11907e-18	-1.52508	89	252	7.74413e-14	Down-regulated
ZNF609	Pig	2.27338e-18	-0.550225	609	808	8.30806e-14	Down-regulated
LPGAT1	Pig	2.67595e-18	-1.27245	156	352	9.77926e-14	Down-regulated
SYCP2	Pig	2.69842e-18	-0.893338	356	583	9.86137e-14	Down-regulated
UBAP2	Pig	2.85022e-18	-0.707677	344	596	1.04161e-13	Down-regulated
TANC2	Pig	2.9738e-18	-0.894553	366	596	1.08678e-13	Down-regulated
TSHZ3	Pig	3.04204e-18	-0.831241	283	525	1.11171e-13	Down-regulated
WLS	Pig	3.23634e-18	-1.0212	159	357	1.18272e-13	Down-regulated
NET1	Pig	3.42565e-18	-1.72198	67	0.21	1.2519e-13	Down-regulated
ENSSSCG00000047500	Pig	3.449e-18	-3.30863	9	79	1.26044e-13	Down-regulated
NSUN3	Pig	3.67621e-18	-0.979923	0.12	304	1.34347e-13	Down-regulated
ZBTB7C	Pig	3.8976e-18	-0.950734	331	564	1.42438e-13	Down-regulated
MYO10	Pig	4.4133e-18	-0.882945	272	491	1.61284e-13	Down-regulated
NEK2	Pig	4.55358e-18	-5.6634	1	47	1.66411e-13	Down-regulated
STC2	Pig	4.96926e-18	-1.73074	44	165	1.81602e-13	Down-regulated
NIN	Pig	5.32351e-18	-0.797889	296	541	1.94548e-13	Down-regulated
TRPC6	Pig	5.40608e-18	-4.7652	3	55	1.97565e-13	Down-regulated
SDC1	Pig	6.40811e-18	-3.93591	2	52	2.34184e-13	Down-regulated
ND1	Pig	6.87172e-18	-2.02016	0.05	176	2.51127e-13	Down-regulated
FHOD3	Pig	6.96462e-18	-2.0652	22	115	2.54522e-13	Down-regulated
SCARB1	Pig	7.25077e-18	-1.01336	119	294	2.6498e-13	Down-regulated
RACGAP1	Pig	7.27817e-18	-1.94016	0.01	81	2.65981e-13	Down-regulated
FANCI	Pig	7.35387e-18	-2.24343	18	105	2.68747e-13	Down-regulated
BLM	Pig	8.5786e-18	-1.71409	36	147	3.13505e-13	Down-regulated
GRID1	Pig	8.64018e-18	-1.57693	108	273	3.15756e-13	Down-regulated
SMTN	Pig	8.77186e-18	-1.07368	82	236	3.20568e-13	Down-regulated
LCORL	Pig	9.70979e-18	-1.09135	157	354	3.54844e-13	Down-regulated
HMMR	Pig	1.01719e-17	-3.52961	5	66	3.71732e-13	Down-regulated
AK4	Pig	1.06564e-17	-0.929627	254	475	3.89438e-13	Down-regulated
ZMYND8	Pig	1.08844e-17	-0.74484	303	549	3.97769e-13	Down-regulated
PRIM2	Pig	1.11266e-17	-1.31591	0.1	262	4.06621e-13	Down-regulated
NUDT3	Pig	1.22852e-17	-0.971464	302	0.53	4.48963e-13	Down-regulated
AFAP1	Pig	1.24229e-17	-0.750208	256	486	4.53994e-13	Down-regulated
ENSSSCG00000005247	Pig	1.30167e-17	-1.22262	122	297	4.75694e-13	Down-regulated
HSP90AA1	Pig	1.41082e-17	-1.31506	311	533	5.15583e-13	Down-regulated
MARK1	Pig	1.41894e-17	-1.09767	132	315	5.18553e-13	Down-regulated
SNX30	Pig	1.6622e-17	-1.09629	106	273	6.0745e-13	Down-regulated
APC	Pig	1.70012e-17	-0.767076	397	638	6.21307e-13	Down-regulated
HIVEP2	Pig	1.80444e-17	-0.736575	584	777	6.59434e-13	Down-regulated
GYG2	Pig	1.84863e-17	-0.876007	84	241	6.75581e-13	Down-regulated
CAPN2	Pig	2.0732e-17	-0.88755	258	486	7.57652e-13	Down-regulated
PHC2	Pig	3.11311e-17	-0.787145	245	475	1.13769e-12	Down-regulated
LOXL3	Pig	3.11986e-17	-0.690338	177	383	1.14015e-12	Down-regulated
TXNDC11	Pig	3.13268e-17	-0.791274	208	436	1.14484e-12	Down-regulated
HSPG2	Pig	3.22212e-17	-0.603751	393	633	1.17752e-12	Down-regulated
FMNL3	Pig	3.23344e-17	-0.82166	0.22	441	1.18166e-12	Down-regulated
IFFO2	Pig	3.52196e-17	-2.01832	34	142	1.2871e-12	Down-regulated
BRIP1	Pig	3.68335e-17	-1.68967	32	136	1.34608e-12	Down-regulated
GCH1	Pig	3.69366e-17	-4.30144	4	58	1.34985e-12	Down-regulated
NAV3	Pig	3.7081e-17	-0.711456	334	0.57	1.35512e-12	Down-regulated
TRIO	Pig	3.90781e-17	-0.634781	678	819	1.42811e-12	Down-regulated
CDK14	Pig	3.98057e-17	-0.615957	774	882	1.4547e-12	Down-regulated
RCVRN	Pig	4.00208e-17	-2.67157	7	68	1.46256e-12	Down-regulated
AGO2	Pig	4.04713e-17	-0.870172	266	491	1.47902e-12	Down-regulated
OSMR	Pig	4.06449e-17	-0.904193	215	423	1.48537e-12	Down-regulated
ASPDH	Pig	4.56237e-17	-1.83425	46	165	1.66732e-12	Down-regulated
HK1	Pig	4.56345e-17	-1.02176	281	501	1.66771e-12	Down-regulated
SLC7A11	Pig	4.63546e-17	-2.72115	39	147	1.69403e-12	Down-regulated
MYO9B	Pig	5.0922e-17	-0.842213	193	404	1.86094e-12	Down-regulated
MALAT1	Human	5.19815e-17	-6.46696	1	45	1.89966e-12	Down-regulated
CREB5	Pig	5.23716e-17	-0.991168	456	656	1.91392e-12	Down-regulated
NLRP3	Pig	5.32127e-17	-4.55262	1	45	1.94466e-12	Down-regulated
FAM120A	Pig	5.58509e-17	-0.856949	277	514	2.04107e-12	Down-regulated
ENSSSCG00000026302	Pig	5.58568e-17	-3.08469	3	55	2.04129e-12	Down-regulated
PDIA5	Pig	5.88203e-17	-1.24493	112	278	2.14959e-12	Down-regulated
KIF21B	Pig	5.89908e-17	-2.37001	8	73	2.15582e-12	Down-regulated
ACOT11	Pig	5.96643e-17	-1.558	38	0.15	2.18043e-12	Down-regulated
EGLN3	Pig	6.23729e-17	-1.90737	39	0.15	2.27942e-12	Down-regulated
E2F8	Pig	6.77193e-17	-3.21929	3	52	2.4748e-12	Down-regulated
ATXN1	Pig	6.80913e-17	-0.610484	641	808	2.4884e-12	Down-regulated
CENPE	Pig	7.29207e-17	-2.86947	17	0.1	2.66489e-12	Down-regulated
MAP4K5	Pig	7.41286e-17	-0.781646	496	698	2.70903e-12	Down-regulated
SLC41A2	Pig	8.0852e-17	-0.713676	252	0.47	2.95474e-12	Down-regulated
SMURF2	Pig	8.99713e-17	-0.834027	481	675	3.288e-12	Down-regulated
STPG4	Pig	9.28193e-17	-1.4418	204	399	3.39208e-12	Down-regulated
PCP4L1	Pig	1.0396e-16	-2.39965	8	71	3.79922e-12	Down-regulated
DPT	Pig	1.0412e-16	-1.28566	68	205	3.80505e-12	Down-regulated
ESYT2	Pig	1.1245e-16	-0.894306	324	572	4.1095e-12	Down-regulated
ENSSSCG00000010172	Pig	1.19369e-16	-0.935447	188	386	4.36234e-12	Down-regulated
ENSSSCG00000049691	Pig	1.28684e-16	-0.872291	567	0.74	4.70277e-12	Down-regulated
CMAH	Pig	1.38319e-16	-3.91729	7	68	5.05486e-12	Down-regulated
ADAMTS12	Pig	1.5493e-16	-1.10975	341	559	5.6619e-12	Down-regulated
ARHGAP28	Pig	1.78802e-16	-0.874549	216	423	6.53432e-12	Down-regulated
NRAP	Pig	1.79149e-16	-6.82028	0	37	6.54701e-12	Down-regulated
DTL	Pig	1.86819e-16	-2.67247	7	68	6.8273e-12	Down-regulated
XKR6	Pig	1.89129e-16	-1.24134	142	0.32	6.91172e-12	Down-regulated
NFIL3	Pig	2.09443e-16	-1.70406	57	184	7.65408e-12	Down-regulated
NARS1	Pig	2.1571e-16	-1.41128	137	315	7.88312e-12	Down-regulated
FHOD1	Pig	2.20744e-16	-4.12231	4	58	8.06707e-12	Down-regulated
TMPO	Pig	2.25029e-16	-2.77376	9	73	8.22367e-12	Down-regulated
ENSSSCG00000008137	Pig	2.29596e-16	-0.872851	375	614	8.39058e-12	Down-regulated
SIPA1L1	Pig	2.3726e-16	-0.731151	0.49	688	8.67068e-12	Down-regulated
USP45	Pig	2.39086e-16	-1.40031	92	244	8.73741e-12	Down-regulated
DENND2A	Pig	2.47769e-16	-1.07015	68	205	9.05473e-12	Down-regulated
CACNA2D1	Pig	2.88035e-16	-0.833939	422	646	1.05262e-11	Down-regulated
EIF4EBP1	Pig	3.05292e-16	-2.53064	0.02	105	1.11569e-11	Down-regulated
PCSK5	Pig	3.41739e-16	-0.899282	429	638	1.24889e-11	Down-regulated
WDR37	Pig	3.45736e-16	-1.10844	108	273	1.26349e-11	Down-regulated
MYO1E	Pig	3.58387e-16	-0.596514	371	606	1.30972e-11	Down-regulated
ARID1A	Pig	3.60525e-16	-1.0502	202	402	1.31754e-11	Down-regulated
SULF1	Pig	3.84557e-16	-0.821993	653	785	1.40536e-11	Down-regulated
ATP8	Pig	3.95974e-16	-4.95882	1	39	1.44709e-11	Down-regulated
MICALL1	Pig	4.00429e-16	-1.58205	35	139	1.46337e-11	Down-regulated
AMOTL2	Pig	4.24831e-16	-1.48895	99	252	1.55255e-11	Down-regulated
ABL1	Pig	4.81968e-16	-0.819033	413	627	1.76135e-11	Down-regulated
PKNOX1	Pig	5.37134e-16	-1.37719	71	207	1.96296e-11	Down-regulated
C18orf54	Pig	5.52673e-16	-1.29561	68	199	2.01974e-11	Down-regulated
E2F3	Pig	5.72496e-16	-0.950365	175	0.37	2.09219e-11	Down-regulated
KIT	Pig	5.86039e-16	-2.40432	15	89	2.14168e-11	Down-regulated
KPNB1	Pig	5.99915e-16	-1.05975	151	328	2.19239e-11	Down-regulated
RPS6KC1	Pig	6.12483e-16	-0.732804	417	651	2.23832e-11	Down-regulated
KIF2C	Pig	6.44395e-16	-2.21196	6	63	2.35494e-11	Down-regulated
MCC	Pig	6.53434e-16	-0.754691	377	588	2.38797e-11	Down-regulated
SIK2	Pig	6.90304e-16	-0.764132	187	391	2.52272e-11	Down-regulated
FERMT2	Pig	7.11106e-16	-0.77217	393	619	2.59874e-11	Down-regulated
ANXA6	Pig	7.58694e-16	-0.792717	213	423	2.77265e-11	Down-regulated
COL5A2	Pig	7.75918e-16	-0.663415	902	0.95	2.83559e-11	Down-regulated
SOCS5	Pig	8.10573e-16	-1.09554	426	619	2.96224e-11	Down-regulated
DISC1	Pig	8.28551e-16	-0.898439	206	404	3.02794e-11	Down-regulated
ENSSSCG00000046579	Pig	9.82135e-16	-0.728489	313	522	3.58921e-11	Down-regulated
GLI3	Pig	1.13691e-15	-0.565441	687	835	4.15485e-11	Down-regulated
PDK1	Pig	1.21324e-15	-1.06237	144	323	4.43378e-11	Down-regulated
HCLS1	Pig	1.34895e-15	-2.79423	0.01	76	4.92975e-11	Down-regulated
TMED8	Pig	1.40704e-15	-1.43587	52	171	5.14203e-11	Down-regulated
TPT1	Pig	1.48608e-15	-1.58943	54	173	5.4309e-11	Down-regulated
CCL2	Pig	1.69509e-15	-1.02844	193	386	6.19471e-11	Down-regulated
ENSSSCG00000013869	Pig	1.70472e-15	-2.211	5	58	6.2299e-11	Down-regulated
KDM2A	Pig	1.73946e-15	-0.613944	599	782	6.35686e-11	Down-regulated
NFIC	Pig	2.28698e-15	-0.71428	274	499	8.35778e-11	Down-regulated
USP10	Pig	2.35571e-15	-0.822319	163	354	8.60895e-11	Down-regulated
COL1A2	Pig	2.41805e-15	-0.628871	694	835	8.83678e-11	Down-regulated
NEIL3	Pig	2.59612e-15	-2.66314	7	63	9.48751e-11	Down-regulated
XYLT1	Pig	2.85717e-15	-0.815881	303	525	1.04415e-10	Down-regulated
SPRED2	Pig	3.06085e-15	-0.803345	222	0.43	1.11859e-10	Down-regulated
IER3	Pig	3.37939e-15	-2.82903	11	76	1.235e-10	Down-regulated
RPL22L1	Pig	3.81107e-15	-1.87155	22	105	1.39276e-10	Down-regulated
ITGA5	Pig	3.86155e-15	-1.08891	236	436	1.4112e-10	Down-regulated
CCM2	Pig	3.89407e-15	-0.919805	113	273	1.42309e-10	Down-regulated
DGKH	Pig	3.89908e-15	-0.880864	397	593	1.42492e-10	Down-regulated
CEP83	Pig	4.00587e-15	-0.981666	198	388	1.46395e-10	Down-regulated
PARP4	Pig	4.17463e-15	-0.702327	285	512	1.52562e-10	Down-regulated
RUVBL1	Pig	4.27309e-15	-1.67928	69	197	1.5616e-10	Down-regulated
15,00 ARL	Pig	4.76644e-15	-0.700762	564	727	1.7419e-10	Down-regulated
RNF2	Pig	4.77779e-15	-1.10398	124	286	1.74605e-10	Down-regulated
TPM4	Pig	4.81313e-15	-0.909288	203	404	1.75896e-10	Down-regulated
HGF	Pig	5.37876e-15	-1.4747	175	346	1.96567e-10	Down-regulated
ARHGAP18	Pig	5.86623e-15	-1.66409	53	168	2.14381e-10	Down-regulated
CYTH1	Pig	6.14992e-15	-0.952459	0.11	265	2.24749e-10	Down-regulated
DDX1	Pig	7.29638e-15	-0.958628	166	354	2.66646e-10	Down-regulated
ENSSSCG00000014242	Pig	7.77314e-15	-0.844887	0.19	378	2.84069e-10	Down-regulated
NTF3	Pig	7.78667e-15	-2.22243	13	81	2.84564e-10	Down-regulated
FANCA	Pig	8.03068e-15	-2.78847	0.01	73	2.93481e-10	Down-regulated
ENSSSCG00000007369	Pig	9.5112e-15	-1.62169	67	192	3.47587e-10	Down-regulated
RAD51	Pig	1.01353e-14	-1.56329	19	97	3.70393e-10	Down-regulated
DCAF12	Pig	1.02053e-14	-0.731669	131	302	3.72952e-10	Down-regulated
SASS6	Pig	1.06352e-14	-1.74257	29	121	3.88662e-10	Down-regulated
XPNPEP2	Pig	1.06747e-14	-1.48503	21	102	3.90106e-10	Down-regulated
TBC1D8	Pig	1.07523e-14	-2.37598	28	115	3.92943e-10	Down-regulated
ARFGAP3	Pig	1.08639e-14	-0.519882	314	554	3.97021e-10	Down-regulated
SRGAP1	Pig	1.12553e-14	-0.529823	575	0.78	4.11326e-10	Down-regulated
COX5A	Pig	1.18406e-14	-1.87212	44	0.15	4.32715e-10	Down-regulated
NOP58	Pig	1.1968e-14	-0.900037	209	407	4.37372e-10	Down-regulated
ND2	Pig	1.26572e-14	-1.56803	46	155	4.62556e-10	Down-regulated
KLC1	Pig	1.29458e-14	-0.688575	404	627	4.73104e-10	Down-regulated
ILF3	Pig	1.31939e-14	-1.13658	125	289	4.82169e-10	Down-regulated
DBN1	Pig	1.36535e-14	-1.2089	39	142	4.98968e-10	Down-regulated
TPK1	Pig	1.36783e-14	-1.26115	151	318	4.99875e-10	Down-regulated
ADAMTS7	Pig	1.43735e-14	-1.60828	45	152	5.25279e-10	Down-regulated
RPL6	Pig	1.49872e-14	-1.2447	0.11	0.26	5.47706e-10	Down-regulated
NETO2	Pig	1.55486e-14	-1.71992	22	102	5.68225e-10	Down-regulated
PDLIM5	Pig	1.63275e-14	-1.17179	287	467	5.96688e-10	Down-regulated
UFM1	Pig	1.64604e-14	-0.838867	207	399	6.01546e-10	Down-regulated
TCEA3	Pig	1.75549e-14	-1.83931	39	139	6.41543e-10	Down-regulated
HACD2	Pig	1.84888e-14	-1.20425	149	318	6.75673e-10	Down-regulated
IL4R	Pig	1.86745e-14	-0.700148	188	375	6.8246e-10	Down-regulated
CD55	Human	2.13444e-14	-3.67603	4	52	7.80031e-10	Down-regulated
AGBL4	Pig	2.28056e-14	-1.65964	52	163	8.33431e-10	Down-regulated
PDCD11	Pig	2.73364e-14	-1.63008	38	136	9.99007e-10	Down-regulated
AKAP8L	Pig	2.77922e-14	-0.960157	131	297	1.01566e-09	Down-regulated
ZFHX4	Pig	2.92017e-14	-0.979055	0.12	273	1.06717e-09	Down-regulated
RANBP6	Pig	2.92851e-14	-1.22116	201	381	1.07022e-09	Down-regulated
LDLR	Pig	3.35898e-14	-1.17981	49	157	1.22754e-09	Down-regulated
PRR11	Pig	3.44342e-14	-2.96377	9	68	1.2584e-09	Down-regulated
SEPTIN9	Pig	3.72387e-14	-0.892757	0.15	325	1.36089e-09	Down-regulated
ATP11C	Pig	3.91837e-14	-0.942846	198	381	1.43197e-09	Down-regulated
CSE1L	Pig	4.00702e-14	-0.968083	137	302	1.46436e-09	Down-regulated
CPLANE1	Pig	4.08382e-14	-0.750468	231	436	1.49243e-09	Down-regulated
CCN4	Pig	4.10367e-14	-0.736367	296	512	1.49968e-09	Down-regulated
RORA	Pig	4.21026e-14	-0.55748	931	966	1.53864e-09	Down-regulated
1,00 AMD	Pig	4.53722e-14	-1.94291	27	113	1.65813e-09	Down-regulated
SLCO5A1	Pig	4.94396e-14	-1.82314	44	147	1.80677e-09	Down-regulated
ATXN7L1	Pig	5.00607e-14	-0.540482	372	591	1.82947e-09	Down-regulated
WWC2	Pig	5.02556e-14	-0.735995	344	549	1.83659e-09	Down-regulated
VEGFA	Human	5.07199e-14	-3.0277	3	47	1.85356e-09	Down-regulated
LMO7	Pig	5.09383e-14	-1.81481	56	168	1.86154e-09	Down-regulated
EFL1	Pig	5.0994e-14	-0.957657	231	0.42	1.86358e-09	Down-regulated
ENSSSCG00000011676	Pig	5.30827e-14	-0.970996	143	312	1.93991e-09	Down-regulated
ATP11A	Pig	5.40321e-14	-0.953402	174	357	1.9746e-09	Down-regulated
PBX4	Pig	5.88856e-14	-0.683948	138	302	2.15197e-09	Down-regulated
ERO1A	Pig	6.00579e-14	-1.97714	151	304	2.19482e-09	Down-regulated
COL4A2	Pig	6.1998e-14	-0.547631	815	911	2.26572e-09	Down-regulated
PSAT1	Pig	6.42763e-14	-2.29111	0.02	94	2.34898e-09	Down-regulated
SKA1	Pig	7.0655e-14	-2.83662	5	55	2.58209e-09	Down-regulated
ENSSSCG00000032626	Pig	7.19144e-14	-1.44745	36	131	2.62811e-09	Down-regulated
TTYH2	Pig	7.77422e-14	-1.1934	62	181	2.84109e-09	Down-regulated
ENSSSCG00000040100	Pig	8.00372e-14	-0.717929	79	0.21	2.92496e-09	Down-regulated
ND3	Pig	8.3453e-14	-2.02017	15	84	3.04979e-09	Down-regulated
INPP5B	Pig	9.1784e-14	-1.08563	89	226	3.35424e-09	Down-regulated
ENSSSCG00000021322	Pig	9.32339e-14	-0.647461	205	396	3.40723e-09	Down-regulated
EPRS1	Pig	9.58896e-14	-0.87317	213	404	3.50429e-09	Down-regulated
ENSSSCG00000008241	Pig	9.854e-14	-0.715438	74	202	3.60115e-09	Down-regulated
VDR	Pig	1.07143e-13	-0.660861	147	312	3.91555e-09	Down-regulated
EEPD1	Pig	1.14018e-13	-1.37608	49	155	4.16678e-09	Down-regulated
RFTN1	Pig	1.15029e-13	-0.879089	144	307	4.20373e-09	Down-regulated
NCAPG2	Pig	1.25031e-13	-1.94924	34	126	4.56924e-09	Down-regulated
ENSSSCG00000014343	Pig	1.25509e-13	-0.778157	362	0.58	4.58673e-09	Down-regulated
COLEC12	Pig	1.25644e-13	-0.755228	605	764	4.59167e-09	Down-regulated
ENSSSCG00000032422	Pig	1.28688e-13	-0.911667	41	142	4.7029e-09	Down-regulated
CYP7B1	Pig	1.31528e-13	-1.03602	194	378	4.80669e-09	Down-regulated
GATAD2A	Pig	1.36299e-13	-0.855785	159	331	4.98104e-09	Down-regulated
DENND1A	Pig	1.39348e-13	-0.626938	534	743	5.09246e-09	Down-regulated
CTNNBIP1	Pig	1.3974e-13	-1.6879	54	163	5.10681e-09	Down-regulated
TET3	Pig	1.41848e-13	-1.2465	67	186	5.18385e-09	Down-regulated
SKI	Pig	1.49063e-13	-0.895113	98	239	5.44752e-09	Down-regulated
BMP1	Pig	1.49075e-13	-0.764776	253	457	5.44794e-09	Down-regulated
FOXP1	Pig	1.57993e-13	-0.560021	0.81	0.9	5.77385e-09	Down-regulated
KANK2	Pig	1.61056e-13	-0.811699	114	265	5.88578e-09	Down-regulated
CDCA7L	Pig	1.63377e-13	-1.50255	35	129	5.97061e-09	Down-regulated
ENSSSCG00000007719	Pig	1.73073e-13	-0.944557	97	239	6.32494e-09	Down-regulated
ENSSSCG00000004806	Pig	1.79927e-13	-1.76082	7	58	6.57542e-09	Down-regulated
PRKAR1B	Pig	1.80439e-13	-1.2364	15	81	6.59415e-09	Down-regulated
MGAT5	Pig	1.86806e-13	-0.965023	251	433	6.82681e-09	Down-regulated
ENSSSCG00000010517	Pig	2.22372e-13	-2.08384	0.03	115	8.1266e-09	Down-regulated
FAM122B	Pig	2.67066e-13	-1.61105	59	173	9.75994e-09	Down-regulated
SLC26A3	Human	2.99186e-13	-6.01419	0	29	1.09338e-08	Down-regulated
FABP5	Pig	2.99186e-13	-6.55214	0	29	1.09338e-08	Down-regulated
RRBP1	Pig	3.31632e-13	-0.577136	0.56	751	1.21195e-08	Down-regulated
PLCL1	Pig	3.70391e-13	-2.05678	49	0.15	1.3536e-08	Down-regulated
USP13	Pig	3.9372e-13	-2.27959	16	84	1.43885e-08	Down-regulated
AOX1	Pig	3.9416e-13	-0.671796	134	291	1.44046e-08	Down-regulated
TLE4	Pig	4.57606e-13	-1.05519	165	331	1.67232e-08	Down-regulated
NRG1	Pig	4.73562e-13	-1.68828	41	136	1.73063e-08	Down-regulated
EDNRA	Pig	5.15414e-13	-0.893897	141	299	1.88358e-08	Down-regulated
ADAMTSL1	Pig	5.39918e-13	-2.30425	37	126	1.97313e-08	Down-regulated
ENSSSCG00000004782	Pig	5.45648e-13	-1.79372	9	63	1.99407e-08	Down-regulated
TSC22D2	Pig	5.63337e-13	-0.740988	295	493	2.05872e-08	Down-regulated
MARK3	Pig	6.1282e-13	-0.647723	437	633	2.23955e-08	Down-regulated
SGO1	Pig	6.42452e-13	-3.93293	3	42	2.34784e-08	Down-regulated
TASOR2	Pig	6.58661e-13	-0.747837	278	483	2.40708e-08	Down-regulated
DCHS2	Pig	6.60395e-13	-2.88077	15	79	2.41341e-08	Down-regulated
PRICKLE2	Pig	6.68011e-13	-0.585673	699	837	2.44125e-08	Down-regulated
SLC4A7	Pig	6.70655e-13	-0.702923	0.36	551	2.45091e-08	Down-regulated
ABHD18	Pig	6.8505e-13	-1.13876	114	0.26	2.50351e-08	Down-regulated
VGLL3	Pig	6.95296e-13	-0.968279	0.27	451	2.54096e-08	Down-regulated
DLG4	Pig	7.03324e-13	-0.931237	95	231	2.5703e-08	Down-regulated
PAPSS2	Pig	7.39137e-13	-0.592883	295	488	2.70117e-08	Down-regulated
ENSSSCG00000025499	Pig	8.37104e-13	-4.00496	5	0.05	3.0592e-08	Down-regulated
GLS	Pig	8.74797e-13	-0.812291	537	693	3.19694e-08	Down-regulated
UHRF1	Pig	9.78035e-13	-4.23202	5	0.05	3.57423e-08	Down-regulated
MASP1	Pig	1.01342e-12	-2.17112	0.03	113	3.70355e-08	Down-regulated
SLC20A1	Pig	1.02619e-12	-0.886508	211	402	3.75021e-08	Down-regulated
VAV2	Pig	1.04443e-12	-0.851119	99	236	3.81688e-08	Down-regulated
DCUN1D4	Pig	1.06008e-12	-1.31696	96	228	3.87406e-08	Down-regulated
RAP1GDS1	Pig	1.07823e-12	-0.982314	198	0.37	3.94038e-08	Down-regulated
IFT88	Pig	1.16097e-12	-0.582975	296	504	4.24277e-08	Down-regulated
LASP1	Pig	1.17098e-12	-0.883645	102	241	4.27936e-08	Down-regulated
SLC41A3	Pig	1.19186e-12	-1.95977	17	84	4.35566e-08	Down-regulated
ENSSSCG00000012262	Pig	1.2389e-12	-0.598104	461	648	4.52757e-08	Down-regulated
UBE2R2	Pig	1.25373e-12	-0.600848	481	672	4.58175e-08	Down-regulated
RASAL2	Pig	1.2864e-12	-0.632525	663	811	4.70114e-08	Down-regulated
ZMYM2	Pig	1.46933e-12	-0.56752	342	556	5.36967e-08	Down-regulated
RYK	Pig	1.57032e-12	-0.634743	447	643	5.73872e-08	Down-regulated
ARHGAP12	Pig	1.63264e-12	-0.663696	297	499	5.9665e-08	Down-regulated
IPO5	Pig	1.7408e-12	-1.33597	84	207	6.36175e-08	Down-regulated
MTREX	Pig	1.86492e-12	-0.758198	297	493	6.81535e-08	Down-regulated
PARPBP	Pig	1.95614e-12	-1.91187	47	144	7.14872e-08	Down-regulated
ENSSSCG00000035811	Pig	2.05517e-12	-1.6824	49	147	7.5106e-08	Down-regulated
IDH2	Pig	2.13005e-12	-1.76799	43	136	7.78426e-08	Down-regulated
ND5	Pig	2.27655e-12	-1.34213	57	163	8.31964e-08	Down-regulated
PFKFB3	Pig	2.41567e-12	-1.13181	0.05	0.15	8.82806e-08	Down-regulated
TTK	Pig	2.43077e-12	-2.00024	8	58	8.88325e-08	Down-regulated
ITGA11	Pig	2.52063e-12	-0.794361	0.19	0.36	9.21163e-08	Down-regulated
APAF1	Pig	2.75465e-12	-0.563323	346	551	1.00669e-07	Down-regulated
LMCD1	Pig	2.77985e-12	-1.73338	52	152	1.0159e-07	Down-regulated
ZNF16	Pig	2.84989e-12	-0.718831	229	409	1.04149e-07	Down-regulated
P3H1	Pig	3.02473e-12	-0.985632	214	396	1.10539e-07	Down-regulated
IQGAP1	Pig	3.1522e-12	-0.609545	429	625	1.15197e-07	Down-regulated
INTS8	Pig	3.26147e-12	-0.936327	128	278	1.19191e-07	Down-regulated
ARHGAP39	Pig	3.405e-12	-0.900532	99	231	1.24436e-07	Down-regulated
ALG14	Pig	3.43913e-12	-0.590384	149	312	1.25683e-07	Down-regulated
RCSD1	Pig	3.45083e-12	-0.76725	0.16	318	1.26111e-07	Down-regulated
NPHP4	Pig	3.45445e-12	-1.16941	39	129	1.26243e-07	Down-regulated
MSN	Pig	3.50759e-12	-0.936481	187	357	1.28185e-07	Down-regulated
APH1B	Pig	3.71532e-12	-1.05606	0.08	199	1.35776e-07	Down-regulated
RGS4	Pig	3.80433e-12	-1.49883	21	92	1.39029e-07	Down-regulated
SSBP3	Pig	3.91977e-12	-0.765223	316	504	1.43248e-07	Down-regulated
RIF1	Pig	3.96869e-12	-0.700987	189	362	1.45036e-07	Down-regulated
RILPL1	Pig	3.99196e-12	-1.33018	74	192	1.45886e-07	Down-regulated
ENSSSCG00000035037	Pig	4.08138e-12	-1.68214	23	97	1.49154e-07	Down-regulated
XRCC2	Pig	4.22987e-12	-3.13708	5	0.05	1.5458e-07	Down-regulated
NUP188	Pig	4.24454e-12	-0.938959	73	192	1.55117e-07	Down-regulated
RALA	Pig	4.59236e-12	-0.873975	119	262	1.67828e-07	Down-regulated
SGSM2	Pig	4.85719e-12	-0.733097	123	0.27	1.77506e-07	Down-regulated
FCHSD2	Pig	4.89137e-12	-0.891196	213	391	1.78755e-07	Down-regulated
TOPAZ1	Pig	4.96661e-12	-1.56356	63	171	1.81505e-07	Down-regulated
WSB1	Pig	5.09363e-12	-0.709543	519	693	1.86147e-07	Down-regulated
SMS	Pig	5.28902e-12	-0.892277	118	257	1.93287e-07	Down-regulated
CSF1	Pig	5.30571e-12	-0.619623	181	349	1.93897e-07	Down-regulated
P4HA2	Pig	5.37319e-12	-0.718705	245	436	1.96363e-07	Down-regulated
CAPZB	Pig	5.69854e-12	-0.548297	289	493	2.08253e-07	Down-regulated
MNAT1	Pig	5.89309e-12	-0.540721	0.41	604	2.15363e-07	Down-regulated
SHCBP1	Pig	5.90082e-12	-4.20297	3	39	2.15645e-07	Down-regulated
ELL	Pig	6.15351e-12	-0.76625	235	415	2.2488e-07	Down-regulated
COX2	Pig	6.35467e-12	-0.524349	449	693	2.32231e-07	Down-regulated
NOL4L	Pig	6.57804e-12	-0.765951	0.18	346	2.40395e-07	Down-regulated
NPAT	Pig	6.6305e-12	-0.891202	126	0.27	2.42312e-07	Down-regulated
MED15	Pig	6.70981e-12	-0.991152	118	0.26	2.4521e-07	Down-regulated
PSPH	Pig	6.9999e-12	-3.82008	5	47	2.55811e-07	Down-regulated
SLC22A14	Pig	7.23788e-12	-5.22071	1	29	2.64508e-07	Down-regulated
ABTB1	Pig	7.273e-12	-5.16065	1	29	2.65792e-07	Down-regulated
CLIC5	Pig	7.273e-12	-6.14437	1	29	2.65792e-07	Down-regulated
KIF20B	Pig	7.28643e-12	-1.91998	22	92	2.66282e-07	Down-regulated
TFB1M	Pig	7.5688e-12	-0.920007	174	333	2.76602e-07	Down-regulated
TSPAN15	Pig	7.73878e-12	-2.89926	5	47	2.82814e-07	Down-regulated
CEP55	Pig	7.77173e-12	-2.26366	8	58	2.84018e-07	Down-regulated
NAA15	Pig	7.80255e-12	-0.821906	231	412	2.85144e-07	Down-regulated
LDLRAD3	Pig	8.0926e-12	-0.547193	373	567	2.95744e-07	Down-regulated
PARVB	Pig	8.16081e-12	-2.16805	25	97	2.98237e-07	Down-regulated
ATP13A3	Pig	8.33823e-12	-0.699211	0.42	625	3.04721e-07	Down-regulated
ENSSSCG00000039544	Pig	8.47044e-12	-0.84749	353	541	3.09552e-07	Down-regulated
ATXN2	Pig	8.51213e-12	-0.58085	479	672	3.11076e-07	Down-regulated
INTS10	Pig	8.61765e-12	-1.05847	92	218	3.14932e-07	Down-regulated
MIS18A	Pig	8.85428e-12	-2.33159	2	37	3.2358e-07	Down-regulated
FLNA	Pig	9.07579e-12	-0.884237	183	341	3.31675e-07	Down-regulated
ACACA	Pig	9.19642e-12	-0.600385	338	533	3.36083e-07	Down-regulated
PPP1R12A	Pig	9.52735e-12	-0.553844	631	787	3.48177e-07	Down-regulated
ENSSSCG00000009293	Pig	9.54139e-12	-0.826501	144	294	3.4869e-07	Down-regulated
WNK1	Pig	9.85287e-12	-0.586213	0.46	646	3.60073e-07	Down-regulated
SLC39A9	Pig	1.03092e-11	-1.01937	135	278	3.76749e-07	Down-regulated
ZFYVE9	Pig	1.07211e-11	-0.625249	412	601	3.91802e-07	Down-regulated
COL14A1	Pig	1.11677e-11	-0.801417	334	514	4.08125e-07	Down-regulated
SPIRE1	Pig	1.1563e-11	-0.666855	167	328	4.22571e-07	Down-regulated
CTDSPL2	Pig	1.20361e-11	-0.574974	316	514	4.39858e-07	Down-regulated
ENSSSCG00000034610	Pig	1.28355e-11	-2.97247	93	207	4.69072e-07	Down-regulated
BDKRB2	Pig	1.35527e-11	-1.92986	29	105	4.95284e-07	Down-regulated
PTPRQ	Pig	1.37065e-11	-3.10152	17	79	5.00905e-07	Down-regulated
SMG7	Pig	1.37642e-11	-0.586435	217	399	5.03015e-07	Down-regulated
DNM2	Pig	1.38019e-11	-0.862191	135	278	5.04391e-07	Down-regulated
PTPN14	Pig	1.39727e-11	-0.978265	123	262	5.10631e-07	Down-regulated
ABLIM3	Pig	1.47886e-11	-1.2651	36	121	5.40449e-07	Down-regulated
SMARCC1	Pig	1.48844e-11	-0.70202	354	543	5.43951e-07	Down-regulated
CRY1	Pig	1.5076e-11	-1.31928	64	171	5.50954e-07	Down-regulated
PITPNA	Pig	1.51631e-11	-0.817282	128	0.27	5.54135e-07	Down-regulated
TLN2	Pig	1.53222e-11	-0.642101	0.61	766	5.59949e-07	Down-regulated
GNL3L	Pig	1.53387e-11	-1.64395	41	129	5.60553e-07	Down-regulated
AVIL	Pig	1.6191e-11	-1.80151	22	92	5.91701e-07	Down-regulated
CNKSR3	Pig	1.6301e-11	-1.41123	57	157	5.9572e-07	Down-regulated
FAM120C	Pig	1.7067e-11	-0.753188	235	415	6.23715e-07	Down-regulated
GOLM1	Pig	1.77601e-11	-0.826263	119	257	6.49043e-07	Down-regulated
DOP1B	Pig	1.8247e-11	-0.76115	143	299	6.66838e-07	Down-regulated
PTPRJ	Pig	1.86569e-11	-0.683084	219	388	6.81817e-07	Down-regulated
ENSSSCG00000032319	Pig	1.89468e-11	-1.56273	22	92	6.92409e-07	Down-regulated
EML4	Pig	1.97112e-11	-0.523049	368	0.57	7.20344e-07	Down-regulated
FANCB	Pig	2.00663e-11	-0.93111	75	189	7.33322e-07	Down-regulated
CCNB1IP1	Pig	2.01536e-11	-2.42828	16	76	7.36513e-07	Down-regulated
CDCA2	Pig	2.03333e-11	-2.29202	13	68	7.43082e-07	Down-regulated
IL27RA	Pig	2.09541e-11	-1.00008	32	113	7.65767e-07	Down-regulated
PRKAR2A	Pig	2.22758e-11	-0.65625	0.38	0.57	8.14069e-07	Down-regulated
ENSSSCG00000031706	Pig	2.2704e-11	-1.57714	19	84	8.29717e-07	Down-regulated
SH3BP4	Pig	2.28279e-11	-0.900563	59	163	8.34245e-07	Down-regulated
FBN1	Pig	2.29681e-11	-0.532843	791	892	8.39368e-07	Down-regulated
PRMT3	Pig	2.41787e-11	-0.713809	317	496	8.83611e-07	Down-regulated
P4HA3	Pig	2.42148e-11	-2.07636	13	68	8.84929e-07	Down-regulated
PRDM15	Pig	2.44031e-11	-1.17485	55	155	8.9181e-07	Down-regulated
PLK1	Pig	2.50625e-11	-3.13064	4	42	9.1591e-07	Down-regulated
HPCAL1	Pig	2.64491e-11	-0.593299	119	257	9.66582e-07	Down-regulated
NCAPD2	Pig	2.68156e-11	-1.23575	44	134	9.79976e-07	Down-regulated
PUS7	Pig	2.81121e-11	-0.725384	0.27	449	1.02736e-06	Down-regulated
FGD6	Pig	2.82727e-11	-1.86812	53	147	1.03323e-06	Down-regulated
ENSSSCG00000041731	Pig	2.83227e-11	-0.658776	136	281	1.03505e-06	Down-regulated
NFXL1	Pig	2.88017e-11	-0.695831	142	289	1.05256e-06	Down-regulated
SLC16A1	Pig	2.93911e-11	-1.19588	68	176	1.0741e-06	Down-regulated
PRMT7	Pig	3.06883e-11	-1.07096	143	289	1.1215e-06	Down-regulated
ZYX	Pig	3.09834e-11	-1.62555	65	168	1.13229e-06	Down-regulated
VKORC1L1	Pig	3.15065e-11	-0.536275	204	375	1.15141e-06	Down-regulated
WDR3	Pig	3.26717e-11	-1.13947	69	178	1.19399e-06	Down-regulated
RNF149	Pig	3.32853e-11	-1.18811	59	0.16	1.21641e-06	Down-regulated
ENSSSCG00000005518	Pig	3.71563e-11	-1.02121	187	346	1.35788e-06	Down-regulated
IL34	Pig	3.83733e-11	-0.786755	264	441	1.40235e-06	Down-regulated
IFRD2	Pig	3.91173e-11	-0.535321	57	157	1.42954e-06	Down-regulated
NPRL3	Pig	4.09016e-11	-0.918675	86	205	1.49475e-06	Down-regulated
HBB	Human	4.24377e-11	-11.3292	0	24	1.55088e-06	Down-regulated
CTNNA3	Pig	4.24377e-11	-5.51991	0	24	1.55088e-06	Down-regulated
COL4A5	Pig	4.24377e-11	-6.82655	0	24	1.55088e-06	Down-regulated
DYNC2H1	Pig	4.26294e-11	-0.592363	273	457	1.55789e-06	Down-regulated
LUZP1	Pig	4.40992e-11	-0.56977	241	423	1.61161e-06	Down-regulated
ROBO2	Pig	4.52967e-11	-1.35161	0.09	207	1.65537e-06	Down-regulated
MKNK2	Pig	4.56649e-11	-1.73641	32	0.11	1.66882e-06	Down-regulated
EMSY	Pig	4.61558e-11	-0.860245	184	341	1.68676e-06	Down-regulated
ENSSSCG00000007088	Pig	4.90435e-11	-1.00534	113	247	1.79229e-06	Down-regulated
ENSSSCG00000005358	Pig	4.93324e-11	-1.7163	0.02	84	1.80285e-06	Down-regulated
BNIP3	Pig	5.17351e-11	-0.99691	146	286	1.89066e-06	Down-regulated
ATAD2	Pig	5.19984e-11	-1.52978	58	155	1.90028e-06	Down-regulated
BSN	Pig	5.75559e-11	-2.10601	14	71	2.10338e-06	Down-regulated
PIWIL4	Pig	5.87453e-11	-0.898899	105	234	2.14685e-06	Down-regulated
ELL2	Pig	5.98631e-11	-1.00566	189	344	2.1877e-06	Down-regulated
ENSSSCG00000038462	Pig	5.9879e-11	-2.89433	3	37	2.18828e-06	Down-regulated
ZWILCH	Pig	6.42267e-11	-1.1665	29	105	2.34716e-06	Down-regulated
SMC2	Pig	6.50274e-11	-1.44021	39	123	2.37643e-06	Down-regulated
IQGAP3	Pig	6.5414e-11	-2.31151	9	58	2.39055e-06	Down-regulated
RECQL	Pig	6.73569e-11	-0.693727	99	226	2.46156e-06	Down-regulated
NAP1L4	Pig	6.73803e-11	-0.880152	134	276	2.46241e-06	Down-regulated
ARMC9	Pig	6.81516e-11	-0.772592	213	378	2.4906e-06	Down-regulated
PDZRN3	Pig	6.96024e-11	-0.520111	0.72	856	2.54362e-06	Down-regulated
ENSSSCG00000048408	Pig	7.02329e-11	-0.853832	129	268	2.56666e-06	Down-regulated
DARS1	Pig	7.25017e-11	-0.76388	0.27	449	2.64957e-06	Down-regulated
ENSSSCG00000032544	Pig	7.54479e-11	-0.585454	128	0.27	2.75724e-06	Down-regulated
CSNK1A1	Pig	7.59521e-11	-0.596948	385	585	2.77567e-06	Down-regulated
ABHD2	Pig	7.893e-11	-1.15277	0.16	302	2.8845e-06	Down-regulated
TET1	Pig	8.44672e-11	-0.500542	151	302	3.08685e-06	Down-regulated
KIF18B	Pig	8.48717e-11	-5.06517	1	26	3.10163e-06	Down-regulated
YARS1	Pig	8.54024e-11	-1.12822	73	181	3.12103e-06	Down-regulated
AHCYL1	Pig	8.72104e-11	-0.81671	201	352	3.1871e-06	Down-regulated
ATAD5	Pig	8.86756e-11	-2.29401	0.02	84	3.24065e-06	Down-regulated
RBL1	Pig	8.90063e-11	-1.14764	88	202	3.25274e-06	Down-regulated
MON2	Pig	9.02834e-11	-0.590464	487	656	3.29941e-06	Down-regulated
ENSSSCG00000007512	Pig	9.68399e-11	-0.979147	0.06	0.16	3.53902e-06	Down-regulated
CENPN	Pig	1.03382e-10	-2.93451	2	31	3.77809e-06	Down-regulated
NUP153	Pig	1.03478e-10	-0.826127	161	318	3.7816e-06	Down-regulated
NDUFA4	Pig	1.13664e-10	-1.95086	11	63	4.15384e-06	Down-regulated
NSUN2	Pig	1.13987e-10	-0.963538	76	186	4.16564e-06	Down-regulated
GNA14	Pig	1.14608e-10	-0.755244	154	297	4.18833e-06	Down-regulated
PLOD1	Pig	1.17241e-10	-0.565808	134	276	4.28458e-06	Down-regulated
PREP	Pig	1.25242e-10	-0.713898	176	333	4.57697e-06	Down-regulated
EIF4E	Pig	1.26403e-10	-0.845433	132	0.27	4.6194e-06	Down-regulated
PTGES	Pig	1.39545e-10	-2.30506	22	87	5.09967e-06	Down-regulated
PIK3C2B	Pig	1.45882e-10	-1.02794	69	173	5.33127e-06	Down-regulated
ALDH18A1	Pig	1.50724e-10	-0.53287	148	294	5.5082e-06	Down-regulated
ENSSSCG00000049427	Pig	1.56734e-10	-1.85067	9	55	5.72783e-06	Down-regulated
LARS1	Pig	1.56811e-10	-0.791902	257	433	5.73067e-06	Down-regulated
ARPC2	Pig	1.58117e-10	-0.682533	259	436	5.77837e-06	Down-regulated
FAM162A	Pig	1.65027e-10	-1.3031	95	213	6.0309e-06	Down-regulated
ENSSSCG00000007188	Pig	1.65974e-10	-1.28747	148	283	6.06553e-06	Down-regulated
MCOLN2	Pig	1.75878e-10	-1.05116	41	126	6.42746e-06	Down-regulated
CDYL	Pig	1.81735e-10	-0.505569	233	415	6.64149e-06	Down-regulated
PLEKHA1	Pig	1.84625e-10	-0.934495	118	247	6.74713e-06	Down-regulated
ATRN	Pig	1.88293e-10	-0.60949	383	0.57	6.88117e-06	Down-regulated
BMP2K	Pig	2.0479e-10	-0.688907	216	375	7.48403e-06	Down-regulated
KIF14	Pig	2.06831e-10	-3.58892	4	39	7.55864e-06	Down-regulated
ENSSSCG00000036363	Pig	2.08215e-10	-2.01108	4	39	7.60921e-06	Down-regulated
ATP6V1A	Pig	2.11901e-10	-1.19535	0.11	234	7.74392e-06	Down-regulated
RALGPS2	Pig	2.17622e-10	-1.1305	32	108	7.95299e-06	Down-regulated
CHSY3	Pig	2.29282e-10	-0.610812	578	706	8.37912e-06	Down-regulated
CDC123	Pig	2.37013e-10	-0.929226	122	252	8.66163e-06	Down-regulated
WRN	Pig	2.41099e-10	-0.802263	144	286	8.81096e-06	Down-regulated
HOMER2	Pig	2.4594e-10	-1.73119	15	71	8.98789e-06	Down-regulated
EPB41L1	Pig	2.54653e-10	-1.97181	45	129	9.30628e-06	Down-regulated
GEMIN5	Pig	2.56493e-10	-1.13873	77	186	9.37355e-06	Down-regulated
TMEM120B	Pig	2.65091e-10	-1.33982	0.05	139	9.68773e-06	Down-regulated
ZNF827	Pig	2.65414e-10	-0.831658	134	0.27	9.69957e-06	Down-regulated
KMT2E	Pig	2.68143e-10	-0.63656	553	727	9.79929e-06	Down-regulated
NOP56	Pig	2.81024e-10	-0.97349	112	239	1.027e-05	Down-regulated
RBPJ	Pig	2.86419e-10	-0.505958	457	651	1.04672e-05	Down-regulated
ZNF395	Pig	2.86797e-10	-0.889965	129	262	1.0481e-05	Down-regulated
ND4L	Pig	2.97678e-10	-1.7544	12	63	1.08786e-05	Down-regulated
AARS1	Pig	3.01177e-10	-1.65019	66	165	1.10065e-05	Down-regulated
SPEN	Pig	3.07065e-10	-0.707066	386	559	1.12217e-05	Down-regulated
ENSSSCG00000016542	Pig	3.1078e-10	-1.79334	0.02	81	1.13575e-05	Down-regulated
NHS	Pig	3.19132e-10	-0.64984	495	635	1.16627e-05	Down-regulated
CRTC1	Pig	3.20051e-10	-0.753673	86	202	1.16963e-05	Down-regulated
TBC1D8B	Pig	3.25506e-10	-0.779426	136	0.27	1.18956e-05	Down-regulated
HDAC4	Pig	3.27796e-10	-0.745561	141	278	1.19793e-05	Down-regulated
MAP2K1	Pig	3.28099e-10	-0.741536	129	262	1.19904e-05	Down-regulated
ZMIZ1	Pig	3.3162e-10	-0.500847	0.35	535	1.2119e-05	Down-regulated
DES	Pig	3.36432e-10	-0.968258	8	52	1.22949e-05	Down-regulated
PI4KA	Pig	3.53766e-10	-0.85397	201	354	1.29284e-05	Down-regulated
ANKDD1A	Pig	3.53795e-10	-2.9367	3	37	1.29294e-05	Down-regulated
ENSSSCG00000025565	Pig	3.62292e-10	-1.23397	52	142	1.324e-05	Down-regulated
ENSSSCG00000007692	Pig	3.87795e-10	-1.1475	116	239	1.4172e-05	Down-regulated
MYLK	Pig	4.01589e-10	-0.827905	326	486	1.46761e-05	Down-regulated
AIG1	Pig	4.03282e-10	-1.89555	41	121	1.47379e-05	Down-regulated
CNTLN	Pig	4.84058e-10	-0.553388	326	504	1.76899e-05	Down-regulated
PEDS1	Pig	4.85144e-10	-1.60548	48	134	1.77296e-05	Down-regulated
SLC35E1	Pig	4.91874e-10	-0.753832	62	0.16	1.79755e-05	Down-regulated
PLOD2	Pig	4.94729e-10	-0.903062	0.8	874	1.80799e-05	Down-regulated
VRK1	Pig	4.98695e-10	-1.34958	0.05	136	1.82248e-05	Down-regulated
STIL	Pig	5.06411e-10	-1.30822	28	97	1.85068e-05	Down-regulated
MT-CO2	Human	5.07837e-10	-6.65332	0	21	1.85589e-05	Down-regulated
ZDHHC2	Pig	5.07837e-10	-5.76203	0	21	1.85589e-05	Down-regulated
PGS1	Pig	5.10589e-10	-1.1658	75	178	1.86595e-05	Down-regulated
PPRC1	Pig	5.26822e-10	-1.05107	53	144	1.92527e-05	Down-regulated
NAA25	Pig	5.28483e-10	-0.865262	231	396	1.93134e-05	Down-regulated
SLC16A3	Pig	5.45727e-10	-1.60001	31	102	1.99436e-05	Down-regulated
ARHGAP35	Pig	5.57597e-10	-0.654165	349	522	2.03774e-05	Down-regulated
EXO1	Pig	5.8655e-10	-1.92633	13	63	2.14355e-05	Down-regulated
SPRED1	Pig	5.91907e-10	-0.623966	452	635	2.16313e-05	Down-regulated
SORD	Pig	5.99151e-10	-1.78318	13	63	2.1896e-05	Down-regulated
PITPNM2	Pig	6.10902e-10	-0.802697	138	273	2.23254e-05	Down-regulated
VPS13D	Pig	6.26068e-10	-0.540638	341	0.53	2.28796e-05	Down-regulated
WDR43	Pig	6.30383e-10	-0.781517	244	407	2.30374e-05	Down-regulated
GYS1	Pig	6.4264e-10	-1.8334	15	68	2.34853e-05	Down-regulated
GPR173	Pig	6.78133e-10	-0.642534	0.09	202	2.47824e-05	Down-regulated
FOXK2	Pig	6.80235e-10	-0.66084	107	228	2.48592e-05	Down-regulated
TENT4A	Pig	6.92787e-10	-1.0239	88	199	2.53179e-05	Down-regulated
ACVR2A	Pig	6.99878e-10	-0.644937	413	0.58	2.55771e-05	Down-regulated
OSBPL6	Pig	7.12494e-10	-0.554583	463	659	2.60381e-05	Down-regulated
MTF1	Pig	7.38383e-10	-0.532499	49	136	2.69842e-05	Down-regulated
OLA1	Pig	7.44814e-10	-0.786445	304	467	2.72192e-05	Down-regulated
PDGFRB	Pig	7.54526e-10	-0.698463	198	352	2.75742e-05	Down-regulated
HIRA	Pig	7.55073e-10	-0.644078	129	265	2.75941e-05	Down-regulated
NAA50	Pig	7.57188e-10	-0.836945	159	302	2.76714e-05	Down-regulated
FBXL18	Pig	7.986e-10	-1.35122	22	84	2.91848e-05	Down-regulated
ENSSSCG00000050398	Pig	8.24331e-10	-0.568813	135	268	3.01252e-05	Down-regulated
UGDH	Pig	8.49683e-10	-0.969584	259	417	3.10517e-05	Down-regulated
ENSSSCG00000017103	Pig	8.99795e-10	-1.24494	25	89	3.2883e-05	Down-regulated
NES	Pig	9.0973e-10	-1.78196	23	87	3.32461e-05	Down-regulated
ASXL1	Pig	9.25622e-10	-0.535465	249	425	3.38269e-05	Down-regulated
KLHL32	Pig	9.30643e-10	-1.42436	21	81	3.40103e-05	Down-regulated
MCPH1	Pig	9.3763e-10	-0.832416	161	302	3.42657e-05	Down-regulated
SLC25A33	Pig	9.54668e-10	-1.73635	33	105	3.48884e-05	Down-regulated
TGM2	Pig	9.57729e-10	-1.6177	47	129	3.50002e-05	Down-regulated
H2BC11	Pig	9.74658e-10	-5.68842	1	24	3.56189e-05	Down-regulated
IRX3	Pig	9.88649e-10	-4.36021	1	24	3.61302e-05	Down-regulated
RPS2	Pig	9.91067e-10	-1.51189	36	0.11	3.62186e-05	Down-regulated
NCAM1	Pig	9.92681e-10	-0.894128	355	507	3.62775e-05	Down-regulated
COX7A1	Pig	9.93356e-10	-3.75852	1	24	3.63022e-05	Down-regulated
PTPRB	Pig	9.93356e-10	-4.29559	1	24	3.63022e-05	Down-regulated
CCND2	Pig	1.03667e-09	-0.682164	97	215	3.78851e-05	Down-regulated
IPO7	Pig	1.0484e-09	-0.629517	241	404	3.83137e-05	Down-regulated
EVL	Pig	1.07944e-09	-1.06853	73	176	3.94482e-05	Down-regulated
RIN3	Pig	1.09133e-09	-0.847325	0.07	171	3.98826e-05	Down-regulated
NEK6	Pig	1.11333e-09	-0.707623	152	291	4.06868e-05	Down-regulated
TMPRSS6	Pig	1.13111e-09	-4.9401	1	26	4.13363e-05	Down-regulated
OTULINL	Pig	1.15634e-09	-1.73973	16	71	4.22586e-05	Down-regulated
ENSSSCG00000032166	Pig	1.15837e-09	-3.12161	7	47	4.23327e-05	Down-regulated
ENSSSCG00000039085	Pig	1.16271e-09	-0.675103	135	268	4.24914e-05	Down-regulated
HECTD4	Pig	1.17633e-09	-0.617644	362	546	4.2989e-05	Down-regulated
ENTPD4	Pig	1.18515e-09	-0.893818	101	218	4.33115e-05	Down-regulated
ENSSSCG00000014909	Pig	1.201e-09	-0.695393	99	213	4.38905e-05	Down-regulated
BIRC3	Pig	1.21424e-09	-0.964562	256	412	4.43742e-05	Down-regulated
ADGRA2	Pig	1.2451e-09	-0.698093	113	236	4.5502e-05	Down-regulated
MPHOSPH8	Pig	1.28211e-09	-0.632988	262	438	4.68546e-05	Down-regulated
LARGE1	Pig	1.35806e-09	-0.676437	393	0.57	4.96303e-05	Down-regulated
CCNY	Pig	1.39e-09	-0.562303	315	491	5.07975e-05	Down-regulated
ZEB2	Pig	1.39446e-09	-0.516387	601	756	5.09606e-05	Down-regulated
MRPS30	Pig	1.41682e-09	-1.11099	74	176	5.17778e-05	Down-regulated
PPM1H	Pig	1.44409e-09	-1.15058	0.06	152	5.27743e-05	Down-regulated
TNRC18	Pig	1.47496e-09	-0.515205	125	255	5.39023e-05	Down-regulated
MCM4	Pig	1.47789e-09	-1.04775	7	47	5.40096e-05	Down-regulated
GINS1	Pig	1.48585e-09	-2.16319	7	47	5.43003e-05	Down-regulated
ENSSSCG00000029709	Pig	1.48884e-09	-3.53106	8	0.05	5.44096e-05	Down-regulated
GUCD1	Pig	1.50423e-09	-1.98964	27	92	5.4972e-05	Down-regulated
SERGEF	Pig	1.55299e-09	-0.53432	237	399	5.67539e-05	Down-regulated
TEAD3	Pig	1.56959e-09	-0.83147	108	231	5.73608e-05	Down-regulated
11,00 ARL	Pig	1.58035e-09	-2.07862	7	47	5.7754e-05	Down-regulated
PHF12	Pig	1.65952e-09	-0.536047	123	249	6.06473e-05	Down-regulated
UGCG	Pig	1.72502e-09	-0.880466	89	199	6.30409e-05	Down-regulated
TRIM27	Pig	1.77976e-09	-0.542206	96	213	6.50414e-05	Down-regulated
TARBP1	Pig	1.84299e-09	-0.546062	184	336	6.73519e-05	Down-regulated
ARHGAP22	Pig	1.86187e-09	-0.522284	196	346	6.80419e-05	Down-regulated
IARS1	Pig	1.87378e-09	-0.576927	393	0.58	6.84774e-05	Down-regulated
GNL2	Pig	1.91248e-09	-1.01726	94	205	6.98918e-05	Down-regulated
PALD1	Pig	1.93871e-09	-1.71011	5	42	7.08501e-05	Down-regulated
KCTD15	Pig	2.216e-09	-1.632	18	73	8.09838e-05	Down-regulated
ENTPD1	Pig	2.23161e-09	-0.854759	121	244	8.15543e-05	Down-regulated
PPP1R8	Pig	2.26255e-09	-1.41498	44	123	8.26848e-05	Down-regulated
ENSSSCG00000009338	Pig	2.2728e-09	-1.09935	0.17	304	8.30594e-05	Down-regulated
ENSSSCG00000006049	Pig	2.38144e-09	-1.32114	41	118	8.70297e-05	Down-regulated
MTRES1	Pig	2.40572e-09	-2.03945	9	52	8.7917e-05	Down-regulated
STIP1	Pig	2.42703e-09	-1.64805	26	89	8.86957e-05	Down-regulated
ARHGEF2	Pig	2.51842e-09	-0.925906	125	249	9.20356e-05	Down-regulated
PRR5	Pig	2.69011e-09	-2.50628	11	58	9.83102e-05	Down-regulated
ENSSSCG00000007080	Pig	2.69979e-09	-0.617621	298	459	9.8664e-05	Down-regulated
SAE1	Pig	2.74286e-09	-1.14595	89	194	0.000100238	Down-regulated
CTCF	Pig	2.77817e-09	-0.704391	221	375	0.000101528	Down-regulated
ZNF496	Pig	2.90944e-09	-0.552185	74	176	0.000106325	Down-regulated
TRIM9	Pig	2.91154e-09	-2.45869	7	45	0.000106402	Down-regulated
LAMA4	Pig	2.91178e-09	-0.515442	569	717	0.000106411	Down-regulated
CTPS1	Pig	2.91731e-09	-0.986511	46	126	0.000106613	Down-regulated
TNFAIP8	Pig	2.92787e-09	-0.786708	63	155	0.000106999	Down-regulated
USO1	Pig	3.0551e-09	-0.51989	0.39	0.57	0.000111649	Down-regulated
GABRA2	Pig	3.06573e-09	-2.55543	3	34	0.000112037	Down-regulated
SNAPC1	Pig	3.08938e-09	-0.89235	105	0.22	0.000112901	Down-regulated
TMEM164	Pig	3.13399e-09	-1.02668	73	171	0.000114532	Down-regulated
THAP4	Pig	3.39116e-09	-1.79619	46	126	0.00012393	Down-regulated
DNMT1	Pig	3.41974e-09	-1.31348	52	136	0.000124974	Down-regulated
SSR1	Pig	3.54728e-09	-0.754385	143	278	0.000129635	Down-regulated
FHDC1	Pig	3.68141e-09	-2.45297	5	39	0.000134537	Down-regulated
CCSER1	Pig	3.71229e-09	-0.749091	0.05	131	0.000135666	Down-regulated
METAP1	Pig	4.14409e-09	-0.784918	149	281	0.000151446	Down-regulated
DPYSL2	Pig	4.19184e-09	-0.574737	407	551	0.000153191	Down-regulated
BLVRA	Pig	4.23724e-09	-0.874577	68	163	0.00015485	Down-regulated
LAP3	Pig	4.26978e-09	-0.642356	138	0.27	0.000156039	Down-regulated
EXTL3	Pig	4.28366e-09	-1.36799	66	157	0.000156546	Down-regulated
PLAU	Pig	4.4517e-09	-1.56549	45	123	0.000162687	Down-regulated
TIPARP	Pig	4.53589e-09	-2.32294	46	123	0.000165764	Down-regulated
FGFR1OP2	Pig	4.5796e-09	-0.875526	121	241	0.000167362	Down-regulated
HPRT1	Pig	4.78137e-09	-1.25575	59	147	0.000174735	Down-regulated
RARS1	Pig	4.79528e-09	-0.818653	127	252	0.000175244	Down-regulated
RAB3GAP2	Pig	4.81192e-09	-0.51776	392	575	0.000175852	Down-regulated
FOXJ3	Pig	4.84491e-09	-0.510223	496	0.68	0.000177057	Down-regulated
COG7	Pig	4.90798e-09	-0.626007	126	249	0.000179362	Down-regulated
PICALM	Pig	4.94396e-09	-0.505704	549	709	0.000180677	Down-regulated
ENSSSCG00000008677	Pig	4.99492e-09	-3.22529	3	31	0.000182539	Down-regulated
ZNF592	Pig	5.22736e-09	-0.627825	228	383	0.000191034	Down-regulated
CEMIP2	Pig	5.23975e-09	-0.576282	308	478	0.000191487	Down-regulated
RAD18	Pig	5.29395e-09	-0.838346	65	157	0.000193467	Down-regulated
PACSIN2	Pig	5.53542e-09	-0.617245	234	386	0.000202292	Down-regulated
RYR3	Pig	5.54885e-09	-2.24976	13	0.06	0.000202783	Down-regulated
PCK2	Pig	6.10754e-09	-6.70869	0	18	0.0002232	Down-regulated
MGAT3	Pig	6.10754e-09	-6.34668	0	18	0.0002232	Down-regulated
KIAA1549L	Pig	6.11338e-09	-2.3736	12	58	0.000223413	Down-regulated
MCM3	Pig	6.49176e-09	-3.4138	4	37	0.000237242	Down-regulated
ESYT1	Pig	6.52172e-09	-2.05883	26	87	0.000238336	Down-regulated
CENPJ	Pig	6.85252e-09	-1.22446	33	102	0.000250425	Down-regulated
NARF	Pig	6.90054e-09	-0.615515	109	226	0.00025218	Down-regulated
SINHCAF	Pig	6.91571e-09	-0.912611	59	147	0.000252735	Down-regulated
ENSSSCG00000034524	Pig	7.09287e-09	-2.63736	4	37	0.000259209	Down-regulated
ASPM	Pig	7.39117e-09	-3.24106	7	45	0.00027011	Down-regulated
SAMD4B	Pig	7.421e-09	-1.12807	0.08	181	0.0002712	Down-regulated
SF3B3	Pig	7.62554e-09	-0.56496	227	388	0.000278675	Down-regulated
FAF2	Pig	7.83505e-09	-0.779752	162	299	0.000286332	Down-regulated
HSF1	Pig	7.97463e-09	-0.684299	0.06	0.15	0.000291433	Down-regulated
ENSSSCG00000036465	Pig	8.05612e-09	-2.6749	7	45	0.000294411	Down-regulated
PHACTR4	Pig	8.41384e-09	-0.625983	275	436	0.000307484	Down-regulated
LTA4H	Pig	8.77499e-09	-1.18011	35	105	0.000320682	Down-regulated
FBXO5	Pig	9.08089e-09	-3.37991	7	45	0.000331861	Down-regulated
DGCR8	Pig	9.4564e-09	-0.882092	66	157	0.000345584	Down-regulated
TBRG4	Pig	9.52135e-09	-1.46672	44	121	0.000347958	Down-regulated
SLC25A42	Pig	9.60536e-09	-1.3556	31	97	0.000351028	Down-regulated
ENSSSCG00000035080	Pig	1.03869e-08	-1.56593	34	102	0.00037959	Down-regulated
SLC8A1	Pig	1.04034e-08	-0.974017	226	373	0.000380193	Down-regulated
ENSSSCG00000007733	Pig	1.04412e-08	-0.548534	147	0.27	0.000381575	Down-regulated
BRF1	Pig	1.05816e-08	-0.666104	59	147	0.000386704	Down-regulated
ENSSSCG00000021236	Pig	1.06481e-08	-0.647754	104	215	0.000389135	Down-regulated
ZZEF1	Pig	1.09969e-08	-0.644451	193	339	0.00040188	Down-regulated
CDC14A	Pig	1.10792e-08	-0.826031	0.11	0.22	0.00040489	Down-regulated
POGLUT1	Pig	1.12e-08	-0.581165	95	202	0.000409302	Down-regulated
NOA1	Pig	1.12858e-08	-0.854393	115	231	0.00041244	Down-regulated
UTP20	Pig	1.1363e-08	-0.65906	129	252	0.000415259	Down-regulated
SH2B3	Pig	1.14686e-08	-1.34786	31	97	0.000419121	Down-regulated
COPS4	Pig	1.19871e-08	-0.869741	102	213	0.00043807	Down-regulated
RLBP1	Pig	1.21222e-08	-1.53642	25	84	0.000443005	Down-regulated
ENSSSCG00000017783	Pig	1.23289e-08	-1.96275	15	63	0.00045056	Down-regulated
GINS4	Pig	1.23911e-08	-1.9352	16	66	0.000452834	Down-regulated
HMGA1	Pig	1.24841e-08	-5.41474	1	24	0.000456233	Down-regulated
ENSSSCG00000040713	Pig	1.25558e-08	-0.533872	117	236	0.000458851	Down-regulated
TMEM184B	Pig	1.2784e-08	-0.873909	123	241	0.00046719	Down-regulated
ANKRD28	Pig	1.30971e-08	-0.561149	496	0.64	0.000478635	Down-regulated
DNAH10	Pig	1.31374e-08	-1.59518	23	81	0.000480107	Down-regulated
MMS19	Pig	1.32165e-08	-0.875992	78	176	0.000482997	Down-regulated
TBCD	Pig	1.33419e-08	-0.60058	153	283	0.000487578	Down-regulated
MND1	Pig	1.38379e-08	-1.61815	9	0.05	0.000505706	Down-regulated
SGO2	Pig	1.40257e-08	-1.67999	14	0.06	0.000512569	Down-regulated
ABCE1	Pig	1.40816e-08	-0.628571	252	415	0.000514611	Down-regulated
KIF3A	Pig	1.44482e-08	-0.615256	213	365	0.000528009	Down-regulated
HNRNPUL1	Pig	1.47381e-08	-0.676956	108	0.22	0.000538603	Down-regulated
KIF24	Pig	1.48304e-08	-2.27829	0.01	52	0.000541977	Down-regulated
FAM120B	Pig	1.51259e-08	-0.638766	217	373	0.000552775	Down-regulated
ENSSSCG00000010860	Pig	1.52744e-08	-1.87078	28	89	0.000558205	Down-regulated
TMEM200A	Pig	1.59577e-08	-1.43133	13	58	0.000583174	Down-regulated
ROCK2	Pig	1.60469e-08	-0.518922	472	627	0.000586433	Down-regulated
MINDY2	Pig	1.62249e-08	-0.645995	152	281	0.00059294	Down-regulated
ITGA2	Pig	1.67862e-08	-2.78216	16	66	0.000613451	Down-regulated
RPS21	Pig	1.70545e-08	-2.01806	21	76	0.000623258	Down-regulated
KDM1A	Pig	1.80976e-08	-0.757404	183	0.32	0.000661375	Down-regulated
CHAF1B	Pig	1.87241e-08	-2.187	7	42	0.000684274	Down-regulated
DYNC2I2	Pig	1.87297e-08	-0.962677	32	97	0.000684478	Down-regulated
ENSSSCG00000012307	Pig	1.87735e-08	-2.56801	7	42	0.000686078	Down-regulated
PRKCE	Pig	1.98828e-08	-0.652539	406	559	0.000726617	Down-regulated
PER2	Pig	2.00556e-08	-1.74126	21	76	0.00073293	Down-regulated
ZBTB8A	Pig	2.09851e-08	-0.662455	38	108	0.000766899	Down-regulated
CTPS2	Pig	2.15874e-08	-0.935226	63	0.15	0.000788913	Down-regulated
PEX14	Pig	2.21922e-08	-0.522065	0.19	336	0.000811015	Down-regulated
SNAP47	Pig	2.24427e-08	-0.790045	144	0.27	0.000820167	Down-regulated
FES	Pig	2.26127e-08	-1.16624	0.04	0.11	0.000826382	Down-regulated
EIF2S2	Pig	2.32337e-08	-0.807298	149	276	0.000849077	Down-regulated
RAD52	Pig	2.38565e-08	-0.602998	203	341	0.000871834	Down-regulated
MEMO1	Pig	2.41311e-08	-0.524159	327	491	0.00088187	Down-regulated
ENSSSCG00000048113	Pig	2.42051e-08	-2.41879	3	31	0.000884574	Down-regulated
CDCA7	Pig	2.4363e-08	-2.88192	3	31	0.000890347	Down-regulated
CCNYL1	Pig	2.46704e-08	-0.759767	0.07	163	0.000901579	Down-regulated
ANKRD42	Pig	2.56636e-08	-0.709177	166	297	0.000937875	Down-regulated
NMNAT1	Pig	2.56916e-08	-1.26019	0.04	0.11	0.000938898	Down-regulated
SMC4	Pig	2.59363e-08	-0.938798	94	194	0.000947841	Down-regulated
CDK17	Pig	2.66674e-08	-0.636951	0.33	478	0.000974561	Down-regulated
MAD2L1	Pig	2.71534e-08	-1.96039	8	45	0.000992322	Down-regulated
ENSSSCG00000000697	Pig	2.72941e-08	-0.722817	0.12	236	0.000997463	Down-regulated
KCNAB1	Pig	2.77637e-08	-1.19511	76	168	0.00101463	Down-regulated
AK8	Pig	2.82489e-08	-1.03474	38	108	0.00103236	Down-regulated
INTS13	Pig	2.82771e-08	-1.11347	58	142	0.00103339	Down-regulated
PHGDH	Pig	2.90717e-08	-2.1053	9	47	0.00106242	Down-regulated
LURAP1	Pig	3.00993e-08	-0.934463	14	0.06	0.00109998	Down-regulated
EEA1	Pig	3.04664e-08	-0.577154	377	554	0.0011134	Down-regulated
HACD1	Pig	3.08972e-08	-1.38325	0.04	0.11	0.00112914	Down-regulated
MTHFD1	Pig	3.11345e-08	-0.897488	67	155	0.00113781	Down-regulated
ATG16L1	Pig	3.13099e-08	-0.809183	105	0.21	0.00114422	Down-regulated
CTBP2	Pig	3.17838e-08	-0.575355	194	333	0.00116154	Down-regulated
QTRT1	Pig	3.19552e-08	-0.593153	53	134	0.0011678	Down-regulated
ENSSSCG00000036556	Pig	3.20283e-08	-0.556737	221	367	0.00117048	Down-regulated
PRELID2	Pig	3.40388e-08	-0.549059	88	189	0.00124395	Down-regulated
ENSSSCG00000032029	Pig	3.43095e-08	-1.15689	37	105	0.00125384	Down-regulated
ELOVL6	Pig	3.55178e-08	-0.732151	158	281	0.001298	Down-regulated
SCD	Pig	3.59978e-08	-1.15607	0.01	0.05	0.00131554	Down-regulated
ENSSSCG00000020830	Pig	3.73985e-08	-0.991384	96	197	0.00136673	Down-regulated
ADAMTS3	Pig	3.80221e-08	-0.930254	276	0.42	0.00138952	Down-regulated
RPL37A	Pig	3.85565e-08	-1.01637	81	173	0.00140905	Down-regulated
ENSSSCG00000011355	Pig	3.91755e-08	-0.661212	11	52	0.00143167	Down-regulated
DPP9	Pig	3.93865e-08	-0.628472	47	123	0.00143938	Down-regulated
CTSO	Pig	4.11828e-08	-0.950723	33	97	0.00150503	Down-regulated
SPRY4	Pig	4.18348e-08	-3.15063	3	29	0.00152885	Down-regulated
TSNAXIP1	Pig	4.21197e-08	-3.54543	3	29	0.00153926	Down-regulated
POC1B	Pig	4.38786e-08	-0.737188	54	134	0.00160354	Down-regulated
MAPK8	Pig	4.53959e-08	-0.543613	285	446	0.00165899	Down-regulated
DOT1L	Pig	4.53978e-08	-0.857355	84	181	0.00165906	Down-regulated
KIF2A	Pig	4.63632e-08	-0.525565	204	344	0.00169434	Down-regulated
AATF	Pig	4.63735e-08	-0.671058	148	268	0.00169472	Down-regulated
ENSSSCG00000036115	Pig	4.71331e-08	-0.553268	292	446	0.00172248	Down-regulated
ENSSSCG00000032877	Pig	4.85442e-08	-0.858067	81	173	0.00177405	Down-regulated
PTPRT	Pig	4.86159e-08	-1.24315	44	115	0.00177667	Down-regulated
P4HA1	Pig	4.89815e-08	-0.539958	502	654	0.00179003	Down-regulated
EPB41L5	Pig	4.9385e-08	-0.611316	93	194	0.00180477	Down-regulated
ENSSSCG00000007117	Pig	5.05574e-08	-2.79549	4	34	0.00184762	Down-regulated
ENSSSCG00000012241	Pig	5.1815e-08	-1.15598	29	89	0.00189358	Down-regulated
GINS2	Pig	5.20693e-08	-2.51841	4	34	0.00190287	Down-regulated
ENSSSCG00000028092	Pig	5.22472e-08	-0.886848	138	252	0.00190937	Down-regulated
TCERG1	Pig	5.29651e-08	-0.518168	0.29	449	0.00193561	Down-regulated
ENSSSCG00000026564	Pig	5.36879e-08	-1.23237	26	84	0.00196203	Down-regulated
PMPCA	Pig	5.47759e-08	-0.98162	53	131	0.00200179	Down-regulated
CKB	Pig	5.78593e-08	-2.65792	8	45	0.00211447	Down-regulated
HSPH1	Pig	5.80616e-08	-1.24773	104	202	0.00212186	Down-regulated
SDCCAG8	Pig	5.94615e-08	-0.653711	257	404	0.00217302	Down-regulated
USP28	Pig	6.12276e-08	-1.15621	53	131	0.00223756	Down-regulated
ENSSSCG00000039107	Pig	6.21442e-08	-2.24968	8	45	0.00227106	Down-regulated
COX10	Pig	6.27992e-08	-1.02672	82	176	0.002295	Down-regulated
TMEM214	Pig	6.48665e-08	-0.607701	0.09	189	0.00237055	Down-regulated
SCN8A	Pig	6.61094e-08	-1.70634	13	55	0.00241597	Down-regulated
CPSF2	Pig	6.61865e-08	-0.793455	94	194	0.00241878	Down-regulated
ENSSSCG00000026520	Pig	6.78767e-08	-1.54148	13	55	0.00248055	Down-regulated
FAM126A	Pig	6.82804e-08	-0.542642	471	633	0.00249531	Down-regulated
INTS7	Pig	6.85931e-08	-0.663891	63	147	0.00250674	Down-regulated
NCAPD3	Pig	6.92008e-08	-1.18073	0.04	108	0.00252894	Down-regulated
CENPS	Pig	6.93173e-08	-1.21726	8	45	0.0025332	Down-regulated
ENSSSCG00000011307	Pig	7.05199e-08	-3.96188	2	26	0.00257715	Down-regulated
CCBE1	Pig	7.13063e-08	-0.655109	772	0.9	0.00260589	Down-regulated
ORC1	Pig	7.17887e-08	-2.81577	2	26	0.00262352	Down-regulated
IFT140	Pig	7.3437e-08	-0.505315	63	147	0.00268376	Down-regulated
ZWINT	Pig	7.39767e-08	-5.09308	0	16	0.00270348	Down-regulated
ZNF804B	Pig	7.39767e-08	-6.05501	0	16	0.00270348	Down-regulated
BARD1	Pig	7.45605e-08	-1.77868	0.02	71	0.00272481	Down-regulated
MARCHF3	Pig	7.62258e-08	-0.500924	266	412	0.00278567	Down-regulated
ERI1	Pig	7.84424e-08	-0.838865	41	0.11	0.00286668	Down-regulated
TSR1	Pig	8.01563e-08	-2.01168	28	87	0.00292931	Down-regulated
GCN1	Pig	8.11855e-08	-0.836174	125	236	0.00296692	Down-regulated
FRA10AC1	Pig	8.14088e-08	-0.660246	0.07	0.16	0.00297508	Down-regulated
LIN9	Pig	8.14506e-08	-1.05951	31	92	0.00297661	Down-regulated
GPR180	Pig	8.34454e-08	-0.526134	97	197	0.00304951	Down-regulated
SLC30A5	Pig	8.42571e-08	-0.56152	185	323	0.00307918	Down-regulated
CENPI	Pig	8.79942e-08	-1.30035	54	131	0.00321575	Down-regulated
MBD3	Pig	9.53568e-08	-1.49348	17	66	0.00348482	Down-regulated
MICU1	Pig	9.79875e-08	-0.530763	282	444	0.00358095	Down-regulated
MAPKAPK2	Pig	9.85321e-08	-0.860079	82	176	0.00360086	Down-regulated
UTP18	Pig	9.9596e-08	-0.756933	57	136	0.00363973	Down-regulated
ENSSSCG00000027778	Pig	9.9643e-08	-0.684582	109	215	0.00364145	Down-regulated
DCLRE1C	Pig	1.00459e-07	-0.832037	88	184	0.00367126	Down-regulated
VANGL1	Pig	1.04697e-07	-1.19145	61	142	0.00382615	Down-regulated
CCNB1	Pig	1.05973e-07	-4.00891	2	24	0.00387278	Down-regulated
CDCA8	Pig	1.06782e-07	-3.20293	2	24	0.00390234	Down-regulated
RAE1	Pig	1.09565e-07	-0.726431	0.11	215	0.00400406	Down-regulated
CAMTA1	Pig	1.10154e-07	-0.582668	205	344	0.00402559	Down-regulated
TAF3	Pig	1.11273e-07	-0.508223	207	341	0.00406646	Down-regulated
LMNB2	Pig	1.16403e-07	-2.15603	7	39	0.00425393	Down-regulated
CARS1	Pig	1.1647e-07	-1.06612	72	157	0.00425639	Down-regulated
NANS	Pig	1.19642e-07	-0.670736	0.16	283	0.00437233	Down-regulated
ENSSSCG00000014569	Pig	1.20492e-07	-0.861786	148	265	0.0044034	Down-regulated
RPS6	Pig	1.24536e-07	-1.17044	63	144	0.00455115	Down-regulated
CKS2	Pig	1.25591e-07	-1.71058	7	39	0.00458973	Down-regulated
MGME1	Pig	1.27132e-07	-0.966023	48	121	0.00464605	Down-regulated
PLXNA2	Pig	1.27419e-07	-1.02354	129	236	0.00465652	Down-regulated
ENSSSCG00000003090	Pig	1.27615e-07	-1.14563	52	126	0.00466369	Down-regulated
ENSSSCG00000004963	Pig	1.28917e-07	-1.10765	26	81	0.00471126	Down-regulated
IL17C	Pig	1.2898e-07	-5.47555	1	18	0.00471359	Down-regulated
CDH22	Pig	1.29578e-07	-5.31662	1	18	0.00473543	Down-regulated
ARHGAP5	Pig	1.29634e-07	-0.581983	383	535	0.00473748	Down-regulated
OSBPL5	Pig	1.29646e-07	-0.878333	84	178	0.0047379	Down-regulated
ST6GALNAC1	Pig	1.30781e-07	-4.82945	1	18	0.0047794	Down-regulated
STXBP5L	Pig	1.32607e-07	-2.99405	1	18	0.00484611	Down-regulated
RPS6KA2	Pig	1.34966e-07	-0.535254	101	202	0.00493235	Down-regulated
PDCD7	Pig	1.35942e-07	-2.12121	26	81	0.00496801	Down-regulated
ENSSSCG00000007524	Pig	1.37766e-07	-1.32966	29	87	0.00503467	Down-regulated
LGMN	Pig	1.39473e-07	-1.83885	28	84	0.00509706	Down-regulated
RBM14	Pig	1.39637e-07	-0.635321	228	0.37	0.00510303	Down-regulated
NFKB1	Pig	1.39744e-07	-0.617834	314	462	0.00510696	Down-regulated
ZNF367	Pig	1.41491e-07	-1.63822	8	42	0.00517077	Down-regulated
CLSPN	Pig	1.43851e-07	-1.14352	19	68	0.00525702	Down-regulated
CSNK1G2	Pig	1.46017e-07	-0.679996	56	134	0.00533619	Down-regulated
ENSSSCG00000035544	Pig	1.49681e-07	-0.753442	187	312	0.0054701	Down-regulated
INPP4B	Pig	1.51978e-07	-2.05085	11	0.05	0.00555403	Down-regulated
SMC3	Pig	1.59095e-07	-0.522973	141	0.26	0.00581413	Down-regulated
CHRNB1	Pig	1.60475e-07	-1.10141	0.06	139	0.00586457	Down-regulated
ADGRE5	Pig	1.61401e-07	-0.803614	45	115	0.0058984	Down-regulated
RPLP2	Pig	1.65301e-07	-1.2969	66	147	0.00604094	Down-regulated
NDC1	Pig	1.65559e-07	-0.860438	45	115	0.00605034	Down-regulated
SELENOI	Pig	1.7019e-07	-1.58371	51	123	0.00621959	Down-regulated
GNL3	Pig	1.70832e-07	-0.703482	86	181	0.00624305	Down-regulated
HAUS8	Pig	1.73034e-07	-1.30737	11	0.05	0.00632352	Down-regulated
DOCK8	Pig	1.77915e-07	-0.594663	17	63	0.00650191	Down-regulated
AUNIP	Pig	1.78619e-07	-1.77627	0.01	47	0.00652762	Down-regulated
SIMC1	Pig	1.8133e-07	-0.803385	104	205	0.00662669	Down-regulated
NSUN6	Pig	1.85047e-07	-0.611796	133	247	0.00676253	Down-regulated
GALNT1	Pig	1.85352e-07	-0.645229	409	556	0.00677367	Down-regulated
ENSSSCG00000023479	Pig	1.86576e-07	-1.13683	0.06	139	0.00681842	Down-regulated
DNAJC11	Pig	1.87388e-07	-0.729878	108	0.21	0.0068481	Down-regulated
CEP89	Pig	1.88062e-07	-0.521788	157	276	0.00687271	Down-regulated
HDAC2	Pig	1.88179e-07	-0.528853	105	207	0.00687702	Down-regulated
ENSSSCG00000023195	Pig	1.94972e-07	-1.62476	17	63	0.00712527	Down-regulated
ZFP30	Pig	1.96134e-07	-0.640023	142	257	0.00716771	Down-regulated
GALNT6	Pig	1.96295e-07	-2.52223	3	29	0.00717361	Down-regulated
TRIT1	Pig	1.98561e-07	-0.663207	184	312	0.0072564	Down-regulated
DIPK2A	Pig	1.98632e-07	-1.39663	41	108	0.007259	Down-regulated
MRPS9	Pig	2.05488e-07	-0.596806	192	325	0.00750957	Down-regulated
SPINDOC	Pig	2.10735e-07	-0.75776	44	113	0.0077013	Down-regulated
SRSF6	Pig	2.11804e-07	-0.51265	189	0.32	0.00774038	Down-regulated
SLC35A3	Pig	2.13577e-07	-0.522491	134	249	0.00780517	Down-regulated
SLIT2	Pig	2.14661e-07	-0.674042	371	522	0.00784477	Down-regulated
TUBB	Pig	2.18788e-07	-0.936349	79	168	0.00799559	Down-regulated
TAOK2	Pig	2.2505e-07	-0.724542	0.07	155	0.00822447	Down-regulated
CYSLTR2	Pig	2.34935e-07	-2.62247	13	52	0.0085857	Down-regulated
ENSSSCG00000033310	Pig	2.36521e-07	-1.11994	147	252	0.00864366	Down-regulated
WDR1	Pig	2.41096e-07	-1.05691	64	144	0.00881084	Down-regulated
SCAF1	Pig	2.4519e-07	-0.982656	63	142	0.00896046	Down-regulated
ENSSSCG00000020913	Pig	2.46253e-07	-1.5628	15	58	0.00899933	Down-regulated
PROS1	Pig	2.48238e-07	-0.64223	163	281	0.00907185	Down-regulated
SURF6	Pig	2.48571e-07	-1.00383	22	73	0.00908403	Down-regulated
HNRNPC	Pig	2.49439e-07	-0.630718	269	412	0.00911575	Down-regulated
PRR3	Pig	2.64289e-07	-0.996703	25	79	0.00965846	Down-regulated
RAD54L	Pig	2.7511e-07	-1.96968	14	55	0.0100539	Down-regulated
GALNT16	Pig	2.79272e-07	-1.54511	13	52	0.010206	Down-regulated
KDELR2	Pig	2.82453e-07	-0.549661	187	318	0.0103222	Down-regulated
RPUSD4	Pig	2.86461e-07	-1.21533	24	76	0.0104687	Down-regulated
TSPAN18	Pig	2.8987e-07	-0.860366	53	126	0.0105933	Down-regulated
CDKL1	Pig	2.93129e-07	-0.761253	0.14	249	0.0107124	Down-regulated
ENOX1	Pig	3.05107e-07	-0.509787	272	412	0.0111502	Down-regulated
PHACTR1	Pig	3.13912e-07	-0.735903	138	247	0.0114719	Down-regulated
NASP	Pig	3.14145e-07	-1.04139	0.04	105	0.0114804	Down-regulated
UBE2Z	Pig	3.17657e-07	-0.559512	0.13	241	0.0116088	Down-regulated
GEN1	Pig	3.18817e-07	-1.8308	7	39	0.0116512	Down-regulated
ENSSSCG00000034572	Pig	3.20747e-07	-1.47437	17	63	0.0117217	Down-regulated
TRMU	Pig	3.25554e-07	-1.12994	44	0.11	0.0118974	Down-regulated
RRP1B	Pig	3.26619e-07	-0.907394	0.04	105	0.0119363	Down-regulated
MSRB3	Pig	3.3149e-07	-0.53242	446	598	0.0121143	Down-regulated
PLEKHA8	Pig	3.37773e-07	-0.570661	113	218	0.0123439	Down-regulated
ENSSSCG00000012202	Pig	3.45609e-07	-1.14734	59	134	0.0126303	Down-regulated
TGFB1	Pig	3.50176e-07	-1.09332	21	71	0.0127972	Down-regulated
ENSSSCG00000002449	Pig	3.51387e-07	-2.77176	4	31	0.0128415	Down-regulated
ACER3	Pig	3.53096e-07	-0.595792	506	651	0.0129039	Down-regulated
SEC23IP	Pig	3.53278e-07	-0.624303	157	276	0.0129106	Down-regulated
NKAIN1	Pig	3.59443e-07	-2.67968	4	31	0.0131359	Down-regulated
TTC38	Pig	3.70162e-07	-0.818472	46	115	0.0135276	Down-regulated
CACNB2	Pig	3.80547e-07	-2.10081	25	76	0.0139071	Down-regulated
SNX8	Pig	3.81142e-07	-0.824138	82	171	0.0139288	Down-regulated
MTMR6	Pig	3.86433e-07	-0.641922	123	228	0.0141222	Down-regulated
MASTL	Pig	3.89068e-07	-1.16077	4	31	0.0142185	Down-regulated
RPL24	Pig	4.30166e-07	-0.952093	137	244	0.0157204	Down-regulated
ENSSSCG00000011798	Pig	4.36309e-07	-0.828167	32	89	0.0159449	Down-regulated
ENSSSCG00000016646	Pig	4.37357e-07	-0.646976	105	205	0.0159832	Down-regulated
METRNL	Pig	4.39683e-07	-1.24899	35	94	0.0160682	Down-regulated
PDLIM4	Pig	4.42755e-07	-0.980823	36	97	0.0161805	Down-regulated
ATP8B4	Pig	4.43516e-07	-2.28269	14	55	0.0162083	Down-regulated
TEX10	Pig	4.50472e-07	-0.884882	148	257	0.0164625	Down-regulated
MED16	Pig	4.68729e-07	-0.937936	35	94	0.0171297	Down-regulated
DAPK3	Pig	4.74627e-07	-1.13263	76	0.16	0.0173452	Down-regulated
ENSSSCG00000038202	Pig	4.89673e-07	-0.670139	66	147	0.0178951	Down-regulated
NTN1	Pig	4.93848e-07	-1.57152	41	105	0.0180477	Down-regulated
ENSSSCG00000005095	Pig	5.01004e-07	-2.82059	5	34	0.0183092	Down-regulated
SCAP	Pig	5.11271e-07	-0.718048	75	0.16	0.0186844	Down-regulated
ENSSSCG00000011729	Pig	5.1872e-07	-0.697987	0.1	194	0.0189566	Down-regulated
PHRF1	Pig	5.18987e-07	-1.0277	118	0.22	0.0189664	Down-regulated
IGDCC4	Pig	5.26039e-07	-0.919649	37	97	0.0192241	Down-regulated
METTL16	Pig	5.29781e-07	-0.83611	122	226	0.0193608	Down-regulated
PUS1	Pig	5.36538e-07	-1.30836	26	79	0.0196078	Down-regulated
BTBD1	Pig	5.37198e-07	-0.617714	165	283	0.0196319	Down-regulated
SPIRE2	Pig	5.37987e-07	-1.54641	18	63	0.0196607	Down-regulated
TARS1	Pig	5.3959e-07	-0.805154	93	186	0.0197193	Down-regulated
DSTYK	Pig	5.63988e-07	-0.593655	101	197	0.0206109	Down-regulated
DHRS11	Pig	5.66877e-07	-1.93157	13	52	0.0207165	Down-regulated
NOL9	Pig	5.68737e-07	-0.584859	75	0.16	0.0207845	Down-regulated
TCOF1	Pig	5.69178e-07	-1.24347	23	73	0.0208006	Down-regulated
GAB3	Pig	5.7801e-07	-0.859844	31	87	0.0211234	Down-regulated
TXNRD3	Pig	5.86154e-07	-0.623433	87	176	0.021421	Down-regulated
GAPVD1	Pig	5.95063e-07	-0.53072	314	472	0.0217466	Down-regulated
ENSSSCG00000034019	Pig	6.08127e-07	-1.83875	0.02	66	0.022224	Down-regulated
USP30	Pig	6.15521e-07	-0.789078	137	244	0.0224942	Down-regulated
BHLHE40	Pig	6.21294e-07	-0.766038	126	228	0.0227052	Down-regulated
BCL2L1	Pig	6.22088e-07	-0.748749	155	268	0.0227342	Down-regulated
ADCY6	Pig	6.23457e-07	-1.57283	31	87	0.0227842	Down-regulated
LIG1	Pig	6.34597e-07	-0.846643	26	79	0.0231913	Down-regulated
CIP2A	Pig	6.47138e-07	-1.42124	21	68	0.0236497	Down-regulated
ST6GALNAC5	Pig	6.47804e-07	-1.74603	2	24	0.023674	Down-regulated
CRLF3	Pig	6.49636e-07	-0.667421	105	202	0.023741	Down-regulated
CD46	Human	6.52491e-07	-3.33742	9	42	0.0238453	Down-regulated
URB1	Pig	6.6355e-07	-0.791546	62	139	0.0242494	Down-regulated
GLP2R	Pig	7.13104e-07	-1.79287	4	29	0.0260604	Down-regulated
CLYBL	Pig	7.23718e-07	-0.854003	113	0.21	0.0264483	Down-regulated
BCR	Pig	7.52765e-07	-1.22613	0.04	102	0.0275098	Down-regulated
EIF4ENIF1	Pig	7.5901e-07	-0.555217	167	286	0.027738	Down-regulated
APTX	Pig	7.61126e-07	-2.03938	8	39	0.0278154	Down-regulated
SLC7A5	Pig	7.73594e-07	-2.72019	4	29	0.028271	Down-regulated
POLR1G	Pig	7.83654e-07	-1.98441	11	47	0.0286386	Down-regulated
OGDH	Pig	7.8805e-07	-0.515255	235	373	0.0287993	Down-regulated
CAD	Pig	7.8922e-07	-0.950717	35	94	0.028842	Down-regulated
HELLS	Pig	8.11036e-07	-0.877273	42	105	0.0296393	Down-regulated
ENSSSCG00000038594	Pig	8.28999e-07	-0.918662	66	144	0.0302958	Down-regulated
SACS	Pig	8.36897e-07	-1.06444	31	87	0.0305844	Down-regulated
MYORG	Pig	8.38344e-07	-0.584847	147	257	0.0306373	Down-regulated
SMC6	Pig	8.39024e-07	-0.556178	186	307	0.0306621	Down-regulated
UTP4	Pig	8.52772e-07	-0.666134	48	115	0.0311646	Down-regulated
KPNA4	Pig	9.04201e-07	-0.512121	0.31	465	0.033044	Down-regulated
DPYD	Human	9.05325e-07	-7.38439	0	13	0.0330851	Down-regulated
ALCAM	Human	9.05325e-07	-7.11239	0	13	0.0330851	Down-regulated
FTL	Human	9.05325e-07	-6.35241	0	13	0.0330851	Down-regulated
ENSSSCG00000004261	Pig	9.05325e-07	-5.95566	0	13	0.0330851	Down-regulated
PLVAP	Pig	9.05325e-07	-5.16029	0	13	0.0330851	Down-regulated
ENSSSCG00000013436	Pig	9.05325e-07	-5.57482	0	13	0.0330851	Down-regulated
LYPD1	Pig	9.05325e-07	-6.07359	0	13	0.0330851	Down-regulated
SLC6A17	Pig	9.05325e-07	-6.35653	0	13	0.0330851	Down-regulated
TNFSF11	Pig	9.05325e-07	-5.66754	0	13	0.0330851	Down-regulated
THBD	Pig	9.05325e-07	-5.31102	0	13	0.0330851	Down-regulated
SHQ1	Pig	9.08139e-07	-0.805315	144	252	0.0331879	Down-regulated
MARK4	Pig	9.12315e-07	-0.853702	81	165	0.0333405	Down-regulated
PPARD	Pig	9.14218e-07	-0.574503	65	142	0.0334101	Down-regulated
TMEM132D	Pig	9.25146e-07	-1.3472	21	68	0.0338095	Down-regulated
PYGO1	Pig	9.30006e-07	-0.8649	33	89	0.0339871	Down-regulated
NME1	Pig	9.51482e-07	-1.35281	16	58	0.0347719	Down-regulated
TTC4	Pig	9.54972e-07	-0.875609	0.06	134	0.0348995	Down-regulated
KIF23	Pig	9.59924e-07	-1.80579	23	71	0.0350804	Down-regulated
ENSSSCG00000009303	Pig	1.00047e-06	-1.06188	66	142	0.036562	Down-regulated
ENSSSCG00000023041	Pig	1.00139e-06	-3.9485	2	21	0.0365958	Down-regulated
GAS2L3	Pig	1.00139e-06	-3.07431	2	21	0.0365958	Down-regulated
GPT2	Pig	1.03123e-06	-1.76991	2	21	0.0376865	Down-regulated
TTN	Pig	1.03123e-06	-1.54244	2	21	0.0376865	Down-regulated
SEC11A	Pig	1.03678e-06	-0.817968	148	252	0.0378892	Down-regulated
EHD4	Pig	1.05029e-06	-0.502523	176	294	0.0383829	Down-regulated
PRICKLE3	Pig	1.07046e-06	-2.01546	17	0.06	0.0391201	Down-regulated
POLR3A	Pig	1.07318e-06	-0.730541	117	215	0.0392194	Down-regulated
ENSSSCG00000045769	Pig	1.08034e-06	-1.26473	0.04	0.1	0.0394809	Down-regulated
DDX51	Pig	1.09297e-06	-0.782655	21	68	0.0399426	Down-regulated
DLGAP1	Pig	1.10455e-06	-1.59959	78	155	0.0403658	Down-regulated
RTCB	Pig	1.11424e-06	-0.660756	98	192	0.0407198	Down-regulated
SLC35D1	Pig	1.1675e-06	-0.739764	0.05	118	0.0426664	Down-regulated
ZBTB40	Pig	1.22203e-06	-0.653218	69	147	0.0446592	Down-regulated
NAA40	Pig	1.23354e-06	-1.22075	0.02	66	0.0450797	Down-regulated
IRAG1	Pig	1.23968e-06	-1.02155	27	79	0.0453041	Down-regulated
HMGXB4	Pig	1.2434e-06	-1.07806	87	171	0.04544	Down-regulated
SOAT1	Pig	1.24589e-06	-0.694077	73	152	0.0455309	Down-regulated
SRRM1	Pig	1.26328e-06	-0.59049	225	357	0.0461665	Down-regulated
RCC2	Pig	1.27158e-06	-1.06938	57	129	0.0464699	Down-regulated
PRRC2A	Pig	1.28608e-06	-0.849165	0.05	118	0.0469999	Down-regulated
CAB39	Pig	1.30073e-06	-0.557912	241	0.37	0.0475351	Down-regulated
SPSB1	Pig	1.31253e-06	-0.881967	0.14	241	0.0479665	Down-regulated
FAR2	Pig	1.35555e-06	-0.904396	54	123	0.0495386	Down-regulated
CAMK1D	Pig	1.36134e-06	-0.701259	92	178	0.0497503	Down-regulated
ENSSSCG00000003421	Pig	1.36794e-06	-0.872448	107	199	0.0499915	Down-regulated

## Sheet: Human lymphoids
gene	Species	p_val	avg_log2FC	pct. 1	pct.2	p_val_adj	level
IFI44L	Human	1.3412e-110	8.46975	0.8	9	4.9014e-106	Up-regulated
ENSSSCG00000034570	Pig	3.27679e-53	11.2651	354	0	1.1975e-48	Up-regulated
IFI44	Human	3.73057e-48	5.0988	492	23	1.36334e-43	Up-regulated
MX1	Human	3.42325e-44	4.31292	569	46	1.25103e-39	Up-regulated
XAF1	Human	6.98631e-22	2.50455	662	181	2.55315e-17	Up-regulated
OAS3	Human	4.11156e-21	3.5023	308	29	1.50257e-16	Up-regulated
DDX60L	Human	8.22747e-18	2.57139	631	0.2	3.00673e-13	Up-regulated
USP18	Human	1.28654e-17	4.45605	154	5	4.70167e-13	Up-regulated
DDX60	Human	4.07379e-16	2.28166	538	144	1.48876e-11	Up-regulated
TSEN2	Pig	1.2438e-15	2.77888	246	26	4.54547e-11	Up-regulated
IFIT1	Human	9.38363e-15	7.93401	92	0	3.42925e-10	Up-regulated
IFIT3	Human	1.00673e-14	6.58774	108	2	3.67911e-10	Up-regulated
CMPK2	Human	1.18544e-14	5.41788	108	2	4.33219e-10	Up-regulated
EIF2AK2	Human	1.45268e-14	2.65155	431	105	5.30881e-10	Up-regulated
HERC6	Human	2.65532e-14	3.2233	292	46	9.70385e-10	Up-regulated
OAS1	Human	5.85304e-14	4.22666	185	15	2.13899e-09	Up-regulated
EPSTI1	Human	2.12072e-13	1.90429	754	395	7.75016e-09	Up-regulated
SAMD12	Human	4.35907e-13	2.89747	215	25	1.59302e-08	Up-regulated
RSAD2	Human	6.37908e-13	3.21926	169	14	2.33124e-08	Up-regulated
ENSG00000257452	Human	6.80959e-13	4.35218	108	3	2.48856e-08	Up-regulated
MYL2	Pig	1.79051e-12	4.49928	92	2	6.54342e-08	Up-regulated
SAT1	Human	2.00069e-11	3.51432	246	42	7.31151e-07	Up-regulated
MB21D2	Human	4.03554e-11	3.57848	138	11	1.47479e-06	Up-regulated
KIAA1217	Human	4.17205e-11	3.02648	138	11	1.52468e-06	Up-regulated
CYSLTR1	Human	4.31309e-11	3.68404	138	11	1.57622e-06	Up-regulated
MAML3	Human	7.82821e-11	5.33995	92	3	2.86082e-06	Up-regulated
TSHZ2	Human	1.14076e-10	2.94497	323	76	4.1689e-06	Up-regulated
LGALS9	Human	2.61677e-10	4.77584	108	6	9.56299e-06	Up-regulated
ENSG00000225885	Human	2.68504e-10	7.91118	62	0	9.81249e-06	Up-regulated
RPLP1	Pig	2.68504e-10	8.11975	62	0	9.81249e-06	Up-regulated
ISG12(A)	Pig	2.68504e-10	8.124	62	0	9.81249e-06	Up-regulated
MX2	Human	1.44184e-09	2.06414	292	67	5.26922e-05	Up-regulated
PRKCE	Human	1.46664e-09	2.24669	0.4	127	5.35983e-05	Up-regulated
CD40LG	Human	1.70836e-09	4.39998	92	5	6.2432e-05	Up-regulated
GNA15	Human	2.28862e-09	3.45337	123	11	8.36377e-05	Up-regulated
GPR141	Human	4.00978e-09	3.97105	138	15	0.000146538	Up-regulated
SPATS2L	Human	4.12818e-09	2.43538	338	101	0.000150864	Up-regulated
PDE7B	Human	8.48716e-09	3.09237	308	88	0.000310163	Up-regulated
TRIM22	Human	9.03229e-09	1.87362	492	198	0.000330085	Up-regulated
ZEB2	Pig	9.87261e-09	4.17321	77	3	0.000360794	Up-regulated
RNF165	Human	1.58167e-08	4.05534	108	9	0.00057802	Up-regulated
CXCL13	Human	1.9391e-08	4.59687	92	6	0.000708645	Up-regulated
RASGRF2	Human	2.04298e-08	2.01578	0.4	138	0.000746607	Up-regulated
AREG	Human	2.45201e-08	3.97883	169	28	0.000896087	Up-regulated
PGAP1	Human	2.67841e-08	2.67677	0.2	37	0.000978826	Up-regulated
ENSG00000290581	Human	3.39701e-08	6.53753	62	2	0.00124144	Up-regulated
ANKRD20A11P	Human	3.48265e-08	6.36256	62	2	0.00127274	Up-regulated
B2M	Pig	3.66027e-08	4.92237	62	2	0.00133765	Up-regulated
ENSG00000287188	Human	3.75234e-08	4.74919	62	2	0.00137129	Up-regulated
RPS20	Pig	3.75234e-08	3.93349	62	2	0.00137129	Up-regulated
MEIS1	Human	4.6234e-08	8.3958	46	0	0.00168962	Up-regulated
RAMP1	Human	4.6234e-08	7.29128	46	0	0.00168962	Up-regulated
ENSG00000288016	Human	4.6234e-08	7.8999	46	0	0.00168962	Up-regulated
ENSG00000259659	Human	4.6234e-08	7.19966	46	0	0.00168962	Up-regulated
FAH	Human	4.6234e-08	6.85513	46	0	0.00168962	Up-regulated
RPL35	Pig	4.6234e-08	7.24388	46	0	0.00168962	Up-regulated
RPL29	Pig	4.6234e-08	7.19617	46	0	0.00168962	Up-regulated
RPS27A	Pig	4.6234e-08	6.66014	46	0	0.00168962	Up-regulated
ENSSSCG00000001229	Pig	4.6234e-08	7.23248	46	0	0.00168962	Up-regulated
GAPDH	Pig	4.6234e-08	6.96042	46	0	0.00168962	Up-regulated
ENSSSCG00000009303	Pig	4.6234e-08	6.71709	46	0	0.00168962	Up-regulated
TDRD7	Human	1.04055e-07	1.67551	185	34	0.00380269	Up-regulated
SKAP2	Human	1.24072e-07	3.49137	138	0.02	0.00453423	Up-regulated
L3MBTL4	Human	1.34362e-07	4.87521	77	5	0.00491025	Up-regulated
LINC00910	Human	1.34731e-07	3.34097	92	8	0.00492375	Up-regulated
OAS2	Human	1.60195e-07	1.98029	231	54	0.00585434	Up-regulated
HERC5	Human	2.06416e-07	1.64816	185	36	0.00754348	Up-regulated
IL12RB2	Human	2.21556e-07	1.74635	354	121	0.00809677	Up-regulated
CLTC	Human	2.23798e-07	1.86564	431	178	0.0081787	Up-regulated
FRMD3	Human	4.96405e-07	2.65197	123	17	0.0181411	Up-regulated
MALAT1	Human	6.61356e-07	0.574533	1	1	0.0241693	Up-regulated
ENSG00000270055	Human	7.29117e-07	3.32854	92	9	0.0266456	Up-regulated
ENSG00000291015	Human	7.90068e-07	2.17667	215	54	0.028873	Up-regulated
ADARB2	Human	9.00076e-07	4.41042	62	3	0.0328933	Up-regulated
SAMD9L	Human	1.08562e-06	1.33811	538	265	0.039674	Up-regulated
ISG15	Human	1.19198e-06	3.68047	77	6	0.043561	Up-regulated
DEGS1	Human	1.1959e-06	2.87986	123	19	0.0437042	Up-regulated
MT-CO2	Human	5.08244e-07	-2.16138	77	407	0.0185738	Down-regulated

## Sheet: Human myeloids
gene	Species	p_val	avg_log2FC	pct. 1	pct.2	p_val_adj	level
ENSSSCG00000034570	Pig	3.2965e-108	8.72664	202	0	1.20471e-103	Up-regulated
ENSG00000253496	Human	6.41422e-84	3.86636	0.3	28	2.34408e-79	Up-regulated
IFI44L	Human	3.86926e-82	3.01464	0.53	129	1.41402e-77	Up-regulated
MX1	Human	2.48789e-78	3.57074	454	93	9.09201e-74	Up-regulated
MALAT1	Human	2.87359e-78	1.08232	994	998	1.05015e-73	Up-regulated
XAF1	Human	6.68924e-76	2.78912	0.64	223	2.44458e-71	Up-regulated
IFIT1	Human	5.99922e-67	5.95613	164	6	2.19242e-62	Up-regulated
HS3ST2	Human	7.946e-66	5.19898	158	5	2.90387e-61	Up-regulated
LILRB5	Human	5.32366e-59	3.51401	309	51	1.94553e-54	Up-regulated
DIP2C	Human	1.10455e-57	4.63178	0.17	0.01	4.03659e-53	Up-regulated
STEAP1B	Human	5.43856e-57	3.58349	237	27	1.98752e-52	Up-regulated
OAS3	Human	7.89384e-55	3.74638	218	24	2.8848e-50	Up-regulated
MX2	Human	1.67272e-53	2.61589	464	138	6.11296e-49	Up-regulated
DHX40	Human	2.63691e-53	3.45891	233	29	9.63658e-49	Up-regulated
SAMD9L	Human	2.55837e-51	2.08866	685	344	9.34955e-47	Up-regulated
SULT1C2	Human	8.84268e-50	7.72522	101	1	3.23156e-45	Up-regulated
IFIT2	Human	8.08826e-47	3.72201	233	36	2.95585e-42	Up-regulated
ENSG00000234426	Human	6.24435e-45	6.65543	85	0	2.282e-40	Up-regulated
IFIT3	Human	1.4491e-41	2.74682	259	0.05	5.29575e-37	Up-regulated
FGF13	Human	9.97322e-41	4.71424	139	12	3.64471e-36	Up-regulated
IFI44	Human	1.51149e-40	2.60247	385	121	5.52375e-36	Up-regulated
ATP10A	Human	1.12175e-38	3.0187	211	35	4.09943e-34	Up-regulated
FARP1	Human	4.77891e-37	4.0707	139	14	1.74645e-32	Up-regulated
IFI27	Human	6.28756e-37	3.69264	174	24	2.29779e-32	Up-regulated
MPPED2	Human	2.45178e-35	5.05105	101	6	8.96004e-31	Up-regulated
GNG12	Human	1.0151e-34	7.36709	69	1	3.70967e-30	Up-regulated
IGSF21	Human	4.78333e-34	2.66013	196	34	1.74807e-29	Up-regulated
RSAD2	Human	1.87285e-33	2.97333	186	32	6.84431e-29	Up-regulated
PER3	Human	3.13746e-33	3.46689	158	22	1.14658e-28	Up-regulated
NPAS3	Human	1.02602e-32	3.63316	155	22	3.74958e-28	Up-regulated
DDX60L	Human	5.55512e-32	1.634	618	0.37	2.03012e-27	Up-regulated
CMPK2	Human	5.15915e-31	3.26496	129	15	1.88541e-26	Up-regulated
USP18	Human	8.66154e-31	4.6904	101	8	3.16536e-26	Up-regulated
PARP14	Human	2.55928e-30	1.16811	833	684	9.35288e-26	Up-regulated
LINC02099	Human	7.31036e-30	4.49916	117	12	2.67157e-25	Up-regulated
EIF2AK2	Human	8.83033e-30	2.469	328	109	3.22704e-25	Up-regulated
ENSG00000229642	Human	1.03348e-29	6.57175	63	1	3.77685e-25	Up-regulated
MTUS1	Human	1.51733e-29	3.49971	0.11	11	5.54508e-25	Up-regulated
HPGDS	Human	3.78893e-28	9.23115	54	0	1.38466e-23	Up-regulated
ISG15	Human	3.8536e-27	4.1844	98	9	1.4083e-22	Up-regulated
FAR2	Human	1.009e-26	1.60337	461	207	3.68739e-22	Up-regulated
SIGLEC1	Human	1.2583e-26	1.92639	476	239	4.59845e-22	Up-regulated
OAS2	Human	1.42144e-26	2.87853	0.18	38	5.19466e-22	Up-regulated
ZBP1	Human	1.98213e-26	3.58604	107	12	7.24369e-22	Up-regulated
RIGI	Human	2.83621e-26	2.27063	319	115	1.03649e-21	Up-regulated
SP140	Human	4.79824e-26	2.57038	297	0.1	1.75352e-21	Up-regulated
ENSG00000231873	Human	1.0977e-25	4.67695	73	4	4.01156e-21	Up-regulated
IFI6	Human	2.58309e-25	4.1924	85	7	9.43991e-21	Up-regulated
ENSG00000226022	Human	1.07178e-24	6.82805	0.05	1	3.91682e-20	Up-regulated
GABRB2	Human	2.21133e-23	9.87733	41	0	8.0813e-19	Up-regulated
TRIM22	Human	4.9355e-23	1.75775	442	223	1.80368e-18	Up-regulated
RNF213	Human	6.50458e-23	0.841513	833	707	2.3771e-18	Up-regulated
STON2	Human	1.44091e-22	3.11854	117	18	5.2658e-18	Up-regulated
AKAP6	Human	3.23007e-22	4.65119	63	4	1.18043e-17	Up-regulated
PYHIN1	Human	6.04688e-22	3.80575	114	18	2.20983e-17	Up-regulated
HERC6	Human	9.86693e-22	3.05358	158	36	3.60587e-17	Up-regulated
JUP	Human	2.77994e-21	4.37855	63	4	1.01593e-16	Up-regulated
ZFPM2-AS1	Human	7.86964e-21	4.54623	54	2	2.87596e-16	Up-regulated
SLFN12L	Human	2.40719e-20	2.71793	202	0.06	8.79708e-16	Up-regulated
TTN	Human	2.6973e-20	4.11956	145	33	9.85727e-16	Up-regulated
CCL2	Human	2.96763e-20	3.15534	117	21	1.08452e-15	Up-regulated
FGD5	Human	4.01186e-20	4.83243	47	2	1.46613e-15	Up-regulated
CCDC141	Human	4.86752e-20	4.21552	69	6	1.77883e-15	Up-regulated
PDE4B	Human	3.72848e-19	0.982414	726	622	1.36257e-14	Up-regulated
ZBED3-AS1	Human	7.84206e-19	2.52563	164	43	2.86588e-14	Up-regulated
MARCO	Human	3.57458e-18	2.05869	347	166	1.30633e-13	Up-regulated
ZBTB16	Human	3.87832e-18	0.987905	625	427	1.41733e-13	Up-regulated
ZNF385D-AS1	Human	4.31102e-18	7.55602	35	0	1.57546e-13	Up-regulated
MAP2	Human	1.02502e-17	2.93686	47	2	3.74594e-13	Up-regulated
THRB	Human	1.42911e-17	1.65242	391	207	5.22269e-13	Up-regulated
EYA2	Human	1.82956e-17	4.40944	0.06	5	6.68612e-13	Up-regulated
COLEC12	Human	2.92451e-17	1.17131	486	295	1.06876e-12	Up-regulated
SP110	Human	3.10516e-17	1.6277	401	217	1.13478e-12	Up-regulated
CCL8	Human	3.38218e-17	2.8723	114	23	1.23602e-12	Up-regulated
GSDMC	Human	9.22492e-17	4.76237	47	3	3.37125e-12	Up-regulated
GNG12-AS1	Human	1.20596e-16	4.79843	38	1	4.40719e-12	Up-regulated
SAMD9	Human	1.34792e-16	2.27932	227	84	4.92597e-12	Up-regulated
HERC5	Human	1.50103e-16	2.38243	189	61	5.48551e-12	Up-regulated
ENSG00000290441	Human	3.24421e-16	1.56581	293	129	1.1856e-11	Up-regulated
PDE8B	Human	5.2124e-16	3.18232	63	7	1.90487e-11	Up-regulated
RNF150	Human	1.79482e-15	3.55839	63	7	6.55916e-11	Up-regulated
FMN1	Human	6.61456e-15	0.538259	0.89	854	2.41729e-10	Up-regulated
WLS	Human	9.62355e-15	2.79045	98	0.02	3.51693e-10	Up-regulated
GOLGA4	Human	1.0336e-14	1.33858	577	422	3.77729e-10	Up-regulated
CABLES1	Human	1.84741e-14	3.1024	95	0.02	6.75136e-10	Up-regulated
PARP9	Human	3.05088e-14	1.1379	479	302	1.11494e-09	Up-regulated
DUSP4	Human	3.83015e-14	4.06446	0.05	5	1.39973e-09	Up-regulated
NRIR	Human	4.23374e-14	2.56154	101	22	1.54722e-09	Up-regulated
SLFN5	Human	6.4887e-14	2.46836	177	63	2.37129e-09	Up-regulated
GMPR	Human	6.64257e-14	1.78514	66	0.01	2.42753e-09	Up-regulated
ASTN2	Human	1.10571e-13	2.43416	0.06	8	4.04082e-09	Up-regulated
SPATS2L	Human	1.69174e-13	1.56721	293	143	6.18248e-09	Up-regulated
MYO1E	Human	1.93411e-13	0.959405	558	388	7.0682e-09	Up-regulated
ANKRD20A11P	Human	2.82166e-13	8.18415	22	0	1.03117e-08	Up-regulated
ICA1	Human	4.40675e-13	2.02848	158	53	1.61045e-08	Up-regulated
STAT2	Human	4.46427e-13	1.32007	435	273	1.63147e-08	Up-regulated
TALAM1	Human	4.70032e-13	0.96665	615	462	1.71773e-08	Up-regulated
OAS1	Human	4.97123e-13	2.09426	161	56	1.81674e-08	Up-regulated
ATP9A	Human	7.21412e-13	3.43336	44	4	2.6364e-08	Up-regulated
AXL	Human	3.01592e-12	2.10524	98	24	1.10217e-07	Up-regulated
1,00 VNN	Human	4.13479e-12	3.10564	63	0.01	1.51106e-07	Up-regulated
ENSG00000253821	Human	5.81493e-12	2.98485	69	13	2.12507e-07	Up-regulated
EMP1	Human	1.0269e-11	1.82454	0.11	31	3.75279e-07	Up-regulated
GAS2L3	Human	1.18115e-11	1.82612	215	95	4.31651e-07	Up-regulated
CFAP61-AS1	Human	1.37584e-11	6.21211	25	1	5.02801e-07	Up-regulated
ENSG00000287415	Human	1.38347e-11	8.88434	19	0	5.05587e-07	Up-regulated
ADCY3	Human	1.61764e-11	2.50353	85	0.02	5.91168e-07	Up-regulated
HES4	Human	1.99079e-11	6.8068	22	0	7.27536e-07	Up-regulated
LINC03070	Human	2.01301e-11	5.70311	22	0	7.35653e-07	Up-regulated
CD28	Human	2.03546e-11	5.51547	22	0	7.4386e-07	Up-regulated
PDGFC	Human	2.70429e-11	1.33278	379	233	9.88282e-07	Up-regulated
RPN1	Human	4.72516e-11	2.28182	151	56	1.72681e-06	Up-regulated
TPRG1	Human	4.82686e-11	0.897531	483	323	1.76397e-06	Up-regulated
SH3PXD2A	Human	4.83759e-11	1.7855	183	75	1.7679e-06	Up-regulated
PLPP3	Human	7.11905e-11	1.75192	183	76	2.60166e-06	Up-regulated
IFIH1	Human	9.72239e-11	1.81075	259	134	3.55305e-06	Up-regulated
SP100	Human	1.02995e-10	1.04943	571	458	3.76395e-06	Up-regulated
MACF1	Human	1.07943e-10	0.801269	754	676	3.94476e-06	Up-regulated
ENSG00000250777	Human	1.1301e-10	3.99169	47	7	4.12996e-06	Up-regulated
ITGB5	Human	1.70813e-10	1.95667	0.17	0.07	6.24234e-06	Up-regulated
ADAMTS6	Human	1.82356e-10	2.76614	57	0.01	6.66418e-06	Up-regulated
PNPT1	Human	2.15683e-10	2.28972	123	41	7.88215e-06	Up-regulated
RND3	Human	2.36767e-10	4.68463	25	1	8.65265e-06	Up-regulated
EPAS1	Human	2.39006e-10	1.94877	126	43	8.73447e-06	Up-regulated
SLFN13	Human	4.64446e-10	2.97223	0.06	12	1.69732e-05	Up-regulated
ZBTB7C	Human	5.46502e-10	6.41112	22	1	1.99719e-05	Up-regulated
KCNMB2-AS1	Human	5.70187e-10	2.96847	44	6	2.08375e-05	Up-regulated
DAAM2	Human	6.94993e-10	1.47294	303	177	2.53985e-05	Up-regulated
ASAP2	Human	8.02021e-10	1.82891	82	21	2.93098e-05	Up-regulated
FGF20	Human	9.18393e-10	5.61593	19	0	3.35627e-05	Up-regulated
PARP12	Human	9.2046e-10	1.31442	309	0.18	3.36382e-05	Up-regulated
HSH2D	Human	9.323e-10	2.97538	0.06	12	3.40709e-05	Up-regulated
ZMAT3	Human	1.06884e-09	1.8628	155	63	3.90609e-05	Up-regulated
IFITM3	Human	1.17626e-09	2.64717	73	17	4.29866e-05	Up-regulated
RESF1	Human	1.27124e-09	1.29177	448	321	4.64574e-05	Up-regulated
HBB	Human	1.30184e-09	1.24643	6	119	4.75756e-05	Up-regulated
LINC00342	Human	2.3928e-09	1.45556	306	181	8.74449e-05	Up-regulated
EPSTI1	Human	2.44526e-09	0.72101	628	545	8.93621e-05	Up-regulated
KCNE1	Human	4.44272e-09	1.2241	429	0.31	0.000162359	Up-regulated
DST	Human	4.85007e-09	2.04233	183	86	0.000177246	Up-regulated
LINC00278	Human	5.49541e-09	0.835728	612	505	0.00020083	Up-regulated
DNM1	Human	6.879e-09	2.10248	98	32	0.000251393	Up-regulated
PARP15	Human	7.67702e-09	1.65363	208	104	0.000280557	Up-regulated
PVT1	Human	7.74104e-09	1.18853	353	227	0.000282896	Up-regulated
ENSG00000272554	Human	7.74129e-09	5.2706	22	1	0.000282905	Up-regulated
IL6	Human	7.74129e-09	5.53278	22	1	0.000282905	Up-regulated
CSTB	Human	8.3083e-09	1.81598	174	79	0.000303627	Up-regulated
ENSG00000234261	Human	9.3115e-09	2.06194	107	37	0.000340289	Up-regulated
FNIP2	Human	9.31257e-09	0.945818	483	359	0.000340328	Up-regulated
LINC02542	Human	1.2417e-08	2.17452	44	7	0.000453781	Up-regulated
SAT1	Human	1.9621e-08	0.546548	833	806	0.00071705	Up-regulated
ABTB2	Human	1.97729e-08	3.03219	41	7	0.0007226	Up-regulated
PHACTR1	Human	2.01947e-08	1.26504	183	85	0.000738016	Up-regulated
MTHFD1L	Human	2.05032e-08	1.12451	224	115	0.00074929	Up-regulated
ENSG00000287069	Human	2.13122e-08	4.95392	19	1	0.000778856	Up-regulated
CHSY3	Human	2.30511e-08	3.8459	28	3	0.000842404	Up-regulated
DAAM1	Human	2.50556e-08	1.3113	211	108	0.000915656	Up-regulated
NFATC2	Human	2.53445e-08	2.67943	85	26	0.000926215	Up-regulated
TCEAL4	Human	2.92357e-08	2.46683	57	13	0.00106842	Up-regulated
SLC47A1	Human	3.13833e-08	3.35663	38	6	0.0011469	Up-regulated
ENSG00000249988	Human	3.17567e-08	2.87095	47	9	0.00116055	Up-regulated
PDPN	Human	3.4484e-08	7.84096	13	0	0.00126022	Up-regulated
ENSG00000232949	Human	3.4484e-08	7.18505	13	0	0.00126022	Up-regulated
AHNAK2	Human	3.4484e-08	7.0394	13	0	0.00126022	Up-regulated
LAMA1	Human	3.4484e-08	8.37397	13	0	0.00126022	Up-regulated
EFNB1	Human	3.4484e-08	7.38342	13	0	0.00126022	Up-regulated
LINC01605	Human	4.08622e-08	7.23764	16	0	0.00149331	Up-regulated
CCL13	Human	4.08622e-08	6.75236	16	0	0.00149331	Up-regulated
TMEM171	Human	4.1079e-08	5.58864	16	0	0.00150123	Up-regulated
NYNRIN	Human	4.1079e-08	6.24241	16	0	0.00150123	Up-regulated
ENSG00000260971	Human	4.15501e-08	1.4512	101	35	0.00151845	Up-regulated
ENSG00000250126	Human	4.17359e-08	5.03987	16	0	0.00152524	Up-regulated
PMP22	Human	5.10529e-08	1.7157	123	49	0.00186573	Up-regulated
ENSG00000290812	Human	5.83868e-08	2.31967	44	8	0.00213375	Up-regulated
HELZ2	Human	6.7875e-08	2.45473	66	18	0.00248049	Up-regulated
OSBPL10	Human	6.79902e-08	4.77342	22	2	0.0024847	Up-regulated
HSP90AA1	Human	6.86234e-08	2.01684	208	0.11	0.00250784	Up-regulated
RGL1	Human	6.92498e-08	0.854787	539	446	0.00253073	Up-regulated
RPS6KA2	Human	7.32711e-08	1.17148	369	254	0.00267769	Up-regulated
MIR100HG	Human	7.57264e-08	2.64979	32	4	0.00276742	Up-regulated
GLIS3	Human	7.80124e-08	1.28121	0.11	41	0.00285096	Up-regulated
HESX1	Human	8.59432e-08	2.2999	69	0.02	0.00314079	Up-regulated
LIMCH1	Human	9.02656e-08	4.16329	28	3	0.00329876	Up-regulated
MCOLN3	Human	9.62765e-08	3.44427	28	3	0.00351842	Up-regulated
PLAAT3	Human	1.06789e-07	2.85342	54	12	0.00390259	Up-regulated
LINC02798	Human	1.1031e-07	3.20723	0.05	11	0.00403128	Up-regulated
IRF7	Human	1.15531e-07	1.96402	98	35	0.00422209	Up-regulated
ZEB1	Human	1.20995e-07	2.79517	0.05	11	0.00442178	Up-regulated
SON	Human	1.23952e-07	0.910751	0.58	0.5	0.00452984	Up-regulated
BIN1	Human	1.33488e-07	2.47012	69	0.02	0.00487834	Up-regulated
LINC02968	Human	1.49908e-07	2.13102	35	5	0.00547838	Up-regulated
CLTC	Human	2.09377e-07	0.860886	435	327	0.00765167	Up-regulated
EPDR1	Human	2.21721e-07	2.10079	54	13	0.00810278	Up-regulated
ENSG00000290976	Human	2.48217e-07	4.54779	19	1	0.00907108	Up-regulated
PRDM6	Human	2.49231e-07	3.50145	19	1	0.00910815	Up-regulated
LY6E	Human	2.70482e-07	2.4296	57	15	0.00988475	Up-regulated
ENSG00000287042	Human	2.78588e-07	2.79473	41	8	0.010181	Up-regulated
NR1D2	Human	2.78899e-07	2.00946	0.11	44	0.0101924	Up-regulated
TRIM25	Human	2.98798e-07	1.1341	202	108	0.0109196	Up-regulated
STARD13	Human	3.0946e-07	0.705493	568	471	0.0113092	Up-regulated
LY6E-DT	Human	3.46706e-07	2.71359	28	4	0.0126704	Up-regulated
UNC5C	Human	3.70863e-07	1.394	139	63	0.0135532	Up-regulated
DDX60	Human	3.83759e-07	1.43759	218	122	0.0140245	Up-regulated
FRMD4A	Human	4.23048e-07	0.845391	394	284	0.0154603	Up-regulated
APOBEC3A	Human	4.24256e-07	3.52626	22	2	0.0155044	Up-regulated
SCP2	Human	4.48289e-07	1.73946	161	0.08	0.0163827	Up-regulated
ANXA4	Human	4.75955e-07	0.901708	341	232	0.0173938	Up-regulated
AHNAK	Human	5.71701e-07	1.18839	492	396	0.0208928	Up-regulated
GAREM1	Human	5.78347e-07	1.44702	126	54	0.0211357	Up-regulated
ENSG00000283415	Human	6.64454e-07	3.07695	32	5	0.0242825	Up-regulated
NT5DC4	Human	7.61229e-07	5.86806	16	1	0.0278191	Up-regulated
ENSG00000289039	Human	7.64619e-07	4.69749	16	1	0.027943	Up-regulated
RAPGEF5	Human	7.88764e-07	2.90284	16	1	0.0288254	Up-regulated
AEN	Human	9.00074e-07	1.96265	35	6	0.0328932	Up-regulated
CD163	Human	9.20319e-07	0.52792	792	728	0.0336331	Up-regulated
AGPAT4	Human	1.01659e-06	1.15224	227	0.13	0.0371513	Up-regulated
OASL	Human	1.0357e-06	3.83983	28	4	0.0378498	Up-regulated
CD109	Human	1.09137e-06	0.961179	132	59	0.039884	Up-regulated
ABLIM3	Human	1.12107e-06	0.982502	259	156	0.0409696	Up-regulated
C1orf162	Human	1.36348e-06	1.3005	205	115	0.0498283	Up-regulated
ARHGAP24	Human	1.86381e-57	-2.90114	155	643	6.8113e-53	Down-regulated
COX3	Pig	5.94449e-50	-6.08782	6	463	2.17241e-45	Down-regulated
COX2	Pig	9.98429e-46	-9.2853	3	429	3.64876e-41	Down-regulated
AOAH	Human	7.91551e-31	-1.65026	256	598	2.89272e-26	Down-regulated
ADAM28	Human	1.65241e-30	-4.70854	25	345	6.03874e-26	Down-regulated
DPYD	Human	1.80863e-28	-0.738742	779	917	6.60965e-24	Down-regulated
CIITA	Human	5.26248e-28	-1.62596	224	559	1.92317e-23	Down-regulated
HIF1A-AS3	Human	8.00704e-28	-3.25307	57	0.37	2.92617e-23	Down-regulated
COX1	Pig	1.53098e-27	-8.09553	3	0.29	5.59497e-23	Down-regulated
SIPA1L1	Human	7.34808e-27	-1.29008	454	715	2.68536e-22	Down-regulated
ATP6	Pig	2.43579e-26	-6.49634	6	285	8.90158e-22	Down-regulated
TBC1D22A	Human	3.45995e-26	-1.05653	511	766	1.26444e-21	Down-regulated
MAML3	Human	4.46482e-26	-1.52051	265	578	1.63167e-21	Down-regulated
SULF2	Human	1.50365e-25	-4.08798	9	286	5.4951e-21	Down-regulated
ANKRD44	Human	3.76993e-25	-1.3621	303	599	1.37772e-20	Down-regulated
P4HA1	Human	9.87434e-24	-2.01648	132	428	3.60858e-19	Down-regulated
PLXDC2	Human	2.02628e-23	-0.81197	729	878	7.40506e-19	Down-regulated
MIR3667HG	Human	2.155e-23	-2.86177	44	319	7.87546e-19	Down-regulated
SLC2A3	Human	1.59477e-22	-1.56299	142	427	5.8281e-18	Down-regulated
FHAD1	Human	8.32815e-22	-7.5112	3	239	3.04352e-17	Down-regulated
SPIDR	Human	1.61576e-20	-0.928331	562	775	5.90478e-16	Down-regulated
VCAN	Human	1.11821e-19	-1.68811	57	307	4.0865e-15	Down-regulated
SSBP2	Human	1.12811e-19	-2.33144	73	325	4.12268e-15	Down-regulated
PFKFB3	Human	5.4791e-19	-1.39037	224	494	2.00234e-14	Down-regulated
PELI2	Human	1.31115e-18	-2.98468	28	251	4.79158e-14	Down-regulated
PIK3CB	Human	2.75763e-18	-1.30682	246	507	1.00778e-13	Down-regulated
DOCK4	Human	5.22969e-18	-0.72898	656	826	1.91119e-13	Down-regulated
PHF21A	Human	7.66146e-18	-1.16852	328	568	2.79988e-13	Down-regulated
SORL1	Human	7.97815e-18	-2.39747	54	278	2.91561e-13	Down-regulated
RIC1	Human	2.22243e-17	-1.4494	224	474	8.12188e-13	Down-regulated
ELL2	Human	3.49778e-17	-1.31161	284	534	1.27826e-12	Down-regulated
CCBE1	Pig	6.24525e-17	-1.88199	0.12	346	2.28233e-12	Down-regulated
CYTB	Pig	9.20073e-17	-5.19435	3	191	3.36241e-12	Down-regulated
MS4A4E	Human	1.50304e-16	-1.9902	0.12	346	5.49286e-12	Down-regulated
SRGN	Human	2.07269e-16	-1.28822	306	537	7.57464e-12	Down-regulated
PICALM	Human	2.07564e-16	-0.840354	429	644	7.58544e-12	Down-regulated
EGLN3	Human	2.86231e-16	-4.14822	16	206	1.04603e-11	Down-regulated
CTSB	Human	3.89277e-16	-0.84844	584	769	1.42261e-11	Down-regulated
FCHO2	Human	4.14687e-16	-1.00118	416	619	1.51547e-11	Down-regulated
APBB1IP	Human	5.1728e-16	-0.91767	416	639	1.8904e-11	Down-regulated
EPB41L3	Human	6.00283e-16	-1.31313	0.29	503	2.19374e-11	Down-regulated
LRRK2	Human	6.78255e-16	-1.15238	369	589	2.47868e-11	Down-regulated
MT-CO2	Human	8.64686e-16	-1.43626	174	408	3.16e-11	Down-regulated
BNIP3L	Human	9.42733e-16	-1.54553	155	383	3.44522e-11	Down-regulated
SLC25A37	Human	1.66647e-15	-1.76888	136	368	6.09011e-11	Down-regulated
SFMBT2	Human	1.69485e-15	-0.86152	401	636	6.19385e-11	Down-regulated
MAP3K2	Human	1.7978e-15	-1.475	205	429	6.57006e-11	Down-regulated
RGS1	Human	4.28994e-15	-1.53581	148	364	1.56776e-10	Down-regulated
PCOLCE2	Human	4.84232e-15	-3.84152	16	194	1.76963e-10	Down-regulated
RNF149	Human	5.15667e-15	-1.03744	375	588	1.8845e-10	Down-regulated
DOCK8	Human	5.8186e-15	-0.66086	672	828	2.12641e-10	Down-regulated
ST8SIA4	Human	8.2423e-15	-1.09688	271	504	3.01215e-10	Down-regulated
NAMPT	Human	9.18841e-15	-1.58243	202	422	3.3579e-10	Down-regulated
CCNY	Human	1.50574e-14	-0.948344	328	547	5.50271e-10	Down-regulated
NOTCH2	Human	2.60931e-14	-1.67998	0.12	0.33	9.53572e-10	Down-regulated
GPRIN3	Human	3.40525e-14	-1.69422	123	324	1.24445e-09	Down-regulated
FAM13A	Human	3.41698e-14	-1.5178	136	352	1.24873e-09	Down-regulated
QKI	Human	4.2495e-14	-0.775817	565	743	1.55298e-09	Down-regulated
ARHGAP15	Human	5.60737e-14	-0.791354	467	655	2.04921e-09	Down-regulated
DOCK10	Human	8.15093e-14	-0.704388	372	596	2.97876e-09	Down-regulated
ZBTB20	Human	1.09193e-13	-0.950713	388	593	3.99046e-09	Down-regulated
RAPGEF2	Human	1.19307e-13	-0.791803	0.3	522	4.36007e-09	Down-regulated
HIF1A	Human	1.31461e-13	-1.18852	192	406	4.80423e-09	Down-regulated
FTX	Human	2.11311e-13	-0.699566	521	0.71	7.72237e-09	Down-regulated
GNA13	Human	2.1454e-13	-1.18622	192	407	7.84038e-09	Down-regulated
WWOX	Human	2.2439e-13	-1.161	227	437	8.20032e-09	Down-regulated
PCSK5	Human	3.53465e-13	-3.30327	32	197	1.29174e-08	Down-regulated
MED13L	Human	3.7833e-13	-0.561633	445	653	1.38261e-08	Down-regulated
KANSL1	Human	3.9162e-13	-0.776706	448	636	1.43117e-08	Down-regulated
ETV6	Human	5.14603e-13	-0.644557	612	788	1.88062e-08	Down-regulated
ENSG00000285534	Human	5.43777e-13	-1.60467	0.11	0.31	1.98723e-08	Down-regulated
CMIP	Human	5.989e-13	-0.76705	404	617	2.18868e-08	Down-regulated
SLC8A1	Human	6.72369e-13	-0.591912	716	831	2.45717e-08	Down-regulated
PDE3B	Human	7.02904e-13	-1.32747	167	372	2.56876e-08	Down-regulated
CYRIA	Human	8.11663e-13	-1.17916	183	389	2.96622e-08	Down-regulated
ZNF292	Human	8.77795e-13	-0.708234	297	515	3.2079e-08	Down-regulated
PTPRC	Human	9.08611e-13	-0.830787	464	634	3.32052e-08	Down-regulated
MT-ND4	Human	9.54713e-13	-1.87365	98	283	3.489e-08	Down-regulated
IFNGR2	Human	1.15501e-12	-1.21127	249	459	4.22099e-08	Down-regulated
LUCAT1	Human	1.16201e-12	-1.11877	221	438	4.24658e-08	Down-regulated
TCF4	Human	1.78397e-12	-1.32279	164	366	6.51951e-08	Down-regulated
TBC1D9	Human	1.79477e-12	-1.74062	79	259	6.55898e-08	Down-regulated
CDC42SE2	Human	2.18338e-12	-0.901066	303	509	7.97915e-08	Down-regulated
GRK3	Human	2.37995e-12	-0.9177	356	561	8.69752e-08	Down-regulated
MIR181A1HG	Human	2.41162e-12	-1.37828	161	349	8.81326e-08	Down-regulated
GRB2	Human	2.45223e-12	-0.685356	391	605	8.96169e-08	Down-regulated
TFRC	Human	2.4874e-12	-2.04924	57	227	9.09019e-08	Down-regulated
IL1R2	Human	2.91085e-12	-0.859586	215	423	1.06377e-07	Down-regulated
RTN1	Human	3.07997e-12	-2.93753	32	188	1.12558e-07	Down-regulated
IGF1R	Human	3.52506e-12	-2.23597	32	189	1.28823e-07	Down-regulated
SRGAP1	Human	4.24458e-12	-1.32681	174	371	1.55118e-07	Down-regulated
RAPGEF1	Human	4.29911e-12	-0.7092	435	641	1.57111e-07	Down-regulated
RNASET2	Human	5.0576e-12	-1.09167	246	451	1.8483e-07	Down-regulated
NDRG1	Human	7.7681e-12	-1.86796	28	182	2.83885e-07	Down-regulated
SGK3	Human	9.77986e-12	-1.06599	189	0.38	3.57405e-07	Down-regulated
FOXP1	Human	9.94126e-12	-0.925939	401	602	3.63303e-07	Down-regulated
FOSL2	Human	1.13513e-11	-3.03724	35	185	4.14833e-07	Down-regulated
PIP4K2A	Human	1.43627e-11	-0.828914	344	547	5.24884e-07	Down-regulated
RIN3	Human	1.92509e-11	-0.758606	334	539	7.03523e-07	Down-regulated
VAV1	Human	1.92864e-11	-2.05319	63	225	7.04821e-07	Down-regulated
PPP3CA	Human	1.96503e-11	-0.915857	237	439	7.18119e-07	Down-regulated
PTPRE	Human	1.96791e-11	-1.03324	233	432	7.19173e-07	Down-regulated
KDM7A	Human	2.12983e-11	-1.11379	126	317	7.78348e-07	Down-regulated
PRKAG2	Human	2.79751e-11	-0.715492	536	707	1.02235e-06	Down-regulated
CSGALNACT1	Human	3.26589e-11	-1.72303	69	231	1.19352e-06	Down-regulated
MT-CYB	Human	3.63669e-11	-2.5632	63	217	1.32903e-06	Down-regulated
ND4	Pig	3.96689e-11	-7.76113	0	123	1.4497e-06	Down-regulated
ZSWIM6	Human	4.61394e-11	-0.687503	508	683	1.68616e-06	Down-regulated
VMP1	Human	4.75694e-11	-0.598657	448	641	1.73843e-06	Down-regulated
SKI	Human	5.08965e-11	-1.86294	73	232	1.86001e-06	Down-regulated
C5AR1	Human	9.09049e-11	-1.92835	85	244	3.32212e-06	Down-regulated
SLC4A7	Human	9.28252e-11	-1.54511	95	259	3.3923e-06	Down-regulated
GBE1	Human	9.47033e-11	-1.11772	167	348	3.46093e-06	Down-regulated
CHST11	Human	9.59679e-11	-0.54718	584	767	3.50715e-06	Down-regulated
FNBP1	Human	1.11353e-10	-0.702788	461	638	4.06941e-06	Down-regulated
SPP1	Human	1.12419e-10	-0.653247	243	456	4.10835e-06	Down-regulated
PAN3	Human	1.16342e-10	-0.741538	369	566	4.25173e-06	Down-regulated
CHN2	Human	1.5289e-10	-0.933623	356	533	5.58737e-06	Down-regulated
FLT3	Human	1.53259e-10	-2.70204	25	0.16	5.60084e-06	Down-regulated
DOCK5	Human	1.92695e-10	-0.68545	303	512	7.04205e-06	Down-regulated
PLIN2	Human	1.96266e-10	-1.36614	129	301	7.17253e-06	Down-regulated
CD74	Human	1.9885e-10	-1.00862	183	0.37	7.26697e-06	Down-regulated
TMEM131L	Human	2.09119e-10	-1.16656	136	315	7.64227e-06	Down-regulated
TNFRSF1B	Human	2.27487e-10	-0.661592	104	275	8.31353e-06	Down-regulated
SSH2	Human	2.29542e-10	-0.65472	524	698	8.3886e-06	Down-regulated
KYNU	Human	2.65979e-10	-0.797024	394	585	9.7202e-06	Down-regulated
TNRC6B	Human	3.19768e-10	-0.669001	388	585	1.16859e-05	Down-regulated
MT-ATP6	Human	4.53788e-10	-1.83818	73	223	1.65837e-05	Down-regulated
SYK	Human	4.62763e-10	-0.69607	363	547	1.69117e-05	Down-regulated
MAN1A1	Human	5.42711e-10	-1.12641	221	402	1.98334e-05	Down-regulated
ZEB2	Pig	5.7782e-10	-3.67094	16	137	2.11164e-05	Down-regulated
1,00 PGK	Human	5.79919e-10	-2.03276	76	223	2.11932e-05	Down-regulated
NAV1	Human	7.48432e-10	-1.27622	0.12	287	2.73515e-05	Down-regulated
TBXAS1	Human	8.91456e-10	-0.606607	621	764	3.25783e-05	Down-regulated
FOXO3	Human	8.91642e-10	-0.968144	284	462	3.2585e-05	Down-regulated
KDM4C	Human	9.81107e-10	-0.848766	297	473	3.58545e-05	Down-regulated
BTG1	Human	1.11362e-09	-2.32201	28	157	4.06973e-05	Down-regulated
TMEM51	Human	1.21863e-09	-0.841698	259	441	4.4535e-05	Down-regulated
FMNL3	Human	1.2471e-09	-1.83032	44	181	4.55752e-05	Down-regulated
RIN2	Human	1.57995e-09	-0.75832	325	0.51	5.77394e-05	Down-regulated
AKAP10	Human	2.09771e-09	-0.718744	0.23	419	7.66607e-05	Down-regulated
GPR155	Human	2.10946e-09	-2.12183	0.06	196	7.70903e-05	Down-regulated
IMMP2L	Human	2.49232e-09	-0.936411	252	422	9.10818e-05	Down-regulated
MGAT4A	Human	2.53417e-09	-0.850475	246	425	9.26111e-05	Down-regulated
ABCA1	Human	2.83518e-09	-0.562393	492	668	0.000103612	Down-regulated
LINC02649	Human	2.96661e-09	-1.45538	32	157	0.000108415	Down-regulated
PELI1	Human	3.55945e-09	-0.957022	151	316	0.00013008	Down-regulated
FAM168A	Human	3.56679e-09	-0.862112	177	349	0.000130348	Down-regulated
REL	Human	3.58508e-09	-1.26761	145	301	0.000131017	Down-regulated
ATP2B1	Human	4.2145e-09	-1.1797	107	261	0.000154019	Down-regulated
ENSG00000286162	Human	4.4453e-09	-1.57862	104	249	0.000162453	Down-regulated
BCAS3	Human	4.86758e-09	-0.838967	315	488	0.000177886	Down-regulated
ITGA4	Human	5.3939e-09	-2.83079	22	136	0.00019712	Down-regulated
PIK3C3	Human	5.47894e-09	-1.45558	107	255	0.000200228	Down-regulated
CRISPLD2	Human	7.081e-09	-1.87097	28	147	0.000258775	Down-regulated
ARID1B	Human	7.90238e-09	-0.687241	0.42	594	0.000288792	Down-regulated
ST6GALNAC3	Human	8.51874e-09	-0.865689	73	215	0.000311318	Down-regulated
TPCN1	Human	9.56259e-09	-1.42088	73	209	0.000349465	Down-regulated
STK38	Human	9.65186e-09	-1.04744	0.11	0.26	0.000352727	Down-regulated
PPARD	Human	9.93181e-09	-1.85357	0.05	178	0.000362958	Down-regulated
PPP1CB	Human	9.95437e-09	-1.70305	104	244	0.000363783	Down-regulated
CLASP1	Human	1.0677e-08	-0.678333	344	525	0.000390193	Down-regulated
XYLT1	Human	1.07891e-08	-1.8628	63	195	0.000394287	Down-regulated
MARCHF1	Human	1.18352e-08	-0.570081	464	624	0.000432518	Down-regulated
KMT2E	Human	1.18636e-08	-0.693593	306	477	0.000433553	Down-regulated
STAT4	Human	1.2531e-08	-2.41781	28	143	0.000457946	Down-regulated
BMP2K	Human	1.25873e-08	-0.650647	397	565	0.000460004	Down-regulated
TBL1XR1	Human	1.29439e-08	-0.730793	0.29	461	0.000473035	Down-regulated
SH3KBP1	Human	1.47993e-08	-0.844574	243	397	0.000540839	Down-regulated
RNF144B	Human	1.48582e-08	-0.682277	388	548	0.000542995	Down-regulated
ZNF609	Human	1.57559e-08	-0.87194	243	407	0.000575798	Down-regulated
VEGFA	Human	1.63322e-08	-2.07529	25	137	0.00059686	Down-regulated
LINC00540	Human	1.63689e-08	-5.16017	6	104	0.000598201	Down-regulated
LINC00486	Human	1.65113e-08	-1.90462	73	0.2	0.000603407	Down-regulated
CNOT2	Human	1.71353e-08	-1.1526	167	321	0.000626211	Down-regulated
LCP1	Human	1.72409e-08	-1.10525	148	0.3	0.000630067	Down-regulated
FRYL	Human	1.99855e-08	-0.835532	259	0.43	0.000730369	Down-regulated
RNF24	Human	2.02993e-08	-1.98347	0.06	185	0.000741839	Down-regulated
ALDH2	Human	2.12719e-08	-2.12821	32	145	0.000777383	Down-regulated
GBP5	Human	2.23118e-08	-1.23786	205	352	0.000815383	Down-regulated
WDFY2	Human	2.39078e-08	-0.681443	0.3	468	0.000873709	Down-regulated
DENND6A	Human	2.43967e-08	-1.48889	76	207	0.000891578	Down-regulated
IRS2	Human	2.54834e-08	-1.54108	82	215	0.000931291	Down-regulated
PHIP	Human	2.91749e-08	-0.621241	0.29	466	0.0010662	Down-regulated
BASP1	Human	2.94137e-08	-1.30623	0.06	186	0.00107492	Down-regulated
EGLN1	Human	3.00817e-08	-1.63484	66	192	0.00109934	Down-regulated
BBS9	Human	3.01839e-08	-1.25418	98	232	0.00110307	Down-regulated
LINC00937	Human	3.31546e-08	-3.38098	13	112	0.00121163	Down-regulated
RALGAPA2	Human	3.34701e-08	-0.888686	221	379	0.00122316	Down-regulated
BRAF	Human	3.71173e-08	-1.11418	158	306	0.00135645	Down-regulated
KDM2A	Human	3.94713e-08	-0.565809	353	526	0.00144248	Down-regulated
PRR5L	Human	3.98839e-08	-2.02023	44	159	0.00145756	Down-regulated
ERO1A	Human	4.71644e-08	-1.52333	85	215	0.00172362	Down-regulated
ZMYM2	Human	4.75891e-08	-0.807126	278	427	0.00173914	Down-regulated
UBE2R2	Human	4.93483e-08	-1.17145	155	0.3	0.00180343	Down-regulated
ADPGK	Human	5.22961e-08	-0.872435	145	297	0.00191116	Down-regulated
NPL	Human	5.29842e-08	-0.551561	0.42	589	0.00193631	Down-regulated
PHF20	Human	5.493e-08	-0.993909	114	256	0.00200742	Down-regulated
ATP11C	Human	6.54912e-08	-1.00601	132	279	0.00239338	Down-regulated
VAPA	Human	6.67631e-08	-1.10304	107	244	0.00243986	Down-regulated
HERPUD1	Human	7.35623e-08	-1.88616	79	202	0.00268834	Down-regulated
ARRB2	Human	8.35237e-08	-1.17278	114	0.25	0.00305237	Down-regulated
SLCO3A1	Human	8.42497e-08	-0.763071	262	428	0.00307891	Down-regulated
HPS3	Human	8.81344e-08	-1.47944	98	224	0.00322087	Down-regulated
CREBBP	Human	9.51155e-08	-0.906765	192	346	0.003476	Down-regulated
ZNF804A	Human	1.01915e-07	-1.50485	0.11	238	0.00372448	Down-regulated
INTS6	Human	1.0307e-07	-1.52433	82	208	0.00376669	Down-regulated
PTPN2	Human	1.03101e-07	-0.795139	205	361	0.00376781	Down-regulated
PFKFB4	Human	1.06901e-07	-1.92624	44	156	0.00390671	Down-regulated
DARS1	Human	1.09027e-07	-1.11429	129	264	0.00398438	Down-regulated
ARID1A	Human	1.13959e-07	-1.05873	167	0.31	0.00416462	Down-regulated
CTNND1	Human	1.22724e-07	-0.894984	259	401	0.00448493	Down-regulated
EXT1	Human	1.25132e-07	-0.649641	227	378	0.00457296	Down-regulated
MT-CO3	Human	1.2968e-07	-1.1673	167	302	0.00473917	Down-regulated
MT-CO1	Human	1.38459e-07	-1.15079	132	266	0.00505998	Down-regulated
GPR183	Human	1.40412e-07	-1.6401	0.06	177	0.00513136	Down-regulated
FRY	Human	1.52225e-07	-1.44485	47	158	0.00556305	Down-regulated
FAM120A	Human	1.5268e-07	-0.954268	129	269	0.0055797	Down-regulated
EVL	Human	1.55538e-07	-0.998496	98	229	0.00568414	Down-regulated
KDM4B	Human	1.55886e-07	-0.90029	0.18	329	0.00569686	Down-regulated
NUMB	Human	1.61269e-07	-0.58512	328	0.5	0.00589359	Down-regulated
ATG16L2	Human	1.66057e-07	-0.717126	98	233	0.00606855	Down-regulated
KDM3A	Human	1.66552e-07	-1.41029	117	247	0.00608665	Down-regulated
CPM	Human	1.66576e-07	-0.847861	382	0.52	0.0060875	Down-regulated
PUM2	Human	1.68935e-07	-0.591192	256	411	0.00617373	Down-regulated
USP24	Human	1.86797e-07	-0.726163	243	393	0.00682649	Down-regulated
ANP32A	Human	1.92886e-07	-1.05735	73	196	0.00704902	Down-regulated
DENND5A	Human	1.97042e-07	-0.680447	278	0.44	0.0072009	Down-regulated
APOL3	Human	2.06929e-07	-1.49809	0.05	161	0.00756223	Down-regulated
HIP1	Human	2.07587e-07	-1.18395	95	222	0.00758626	Down-regulated
AHR	Human	2.22024e-07	-1.18739	98	224	0.00811385	Down-regulated
XRCC4	Human	2.22036e-07	-1.10409	123	256	0.00811432	Down-regulated
NUDT3	Human	2.4646e-07	-0.858317	249	395	0.00900689	Down-regulated
RASA1	Human	2.47112e-07	-0.976561	221	358	0.00903072	Down-regulated
OLFML2B	Human	2.48691e-07	-1.22899	69	185	0.00908842	Down-regulated
RASSF2	Human	2.49637e-07	-0.526466	155	302	0.00912298	Down-regulated
POLR2J3	Human	2.66293e-07	-0.70389	167	0.31	0.00973167	Down-regulated
TNFAIP8	Human	2.68866e-07	-0.614769	0.3	458	0.0098257	Down-regulated
AMPD3	Human	2.69776e-07	-0.916824	95	224	0.00985896	Down-regulated
MXD1	Human	2.73385e-07	-0.690699	82	207	0.00999085	Down-regulated
TAB2	Human	2.94994e-07	-0.713225	208	354	0.0107806	Down-regulated
DPYD-AS1	Human	2.97789e-07	-1.85143	41	145	0.0108827	Down-regulated
SPECC1	Human	3.15112e-07	-0.832091	145	284	0.0115158	Down-regulated
MS4A7	Human	3.19606e-07	-0.716789	215	355	0.01168	Down-regulated
ENO1	Human	3.31373e-07	-1.49307	98	219	0.01211	Down-regulated
UBE2D3	Human	3.35458e-07	-0.876073	202	344	0.0122593	Down-regulated
CD86	Human	3.36953e-07	-0.913463	249	393	0.0123139	Down-regulated
LRCH3	Human	3.44335e-07	-0.929181	142	277	0.0125837	Down-regulated
CUL1	Human	3.45682e-07	-0.797822	174	313	0.0126329	Down-regulated
SYTL3	Human	3.75869e-07	-2.03441	0.05	156	0.0137361	Down-regulated
AFAP1	Human	3.88488e-07	-7.32344	0	76	0.0141973	Down-regulated
PBX3	Human	3.95522e-07	-0.919789	224	366	0.0144544	Down-regulated
INSR	Human	4.19308e-07	-1.56513	32	131	0.0153236	Down-regulated
MAP4K3	Human	4.32332e-07	-0.786758	174	315	0.0157996	Down-regulated
LPIN2	Human	4.63037e-07	-0.862874	158	302	0.0169217	Down-regulated
TBL1X	Human	4.78032e-07	-0.964661	132	267	0.0174697	Down-regulated
SNX6	Human	4.8808e-07	-0.729506	249	397	0.0178369	Down-regulated
MXI1	Human	4.90906e-07	-1.15514	85	201	0.0179401	Down-regulated
PLCL2	Human	5.22649e-07	-0.581766	297	455	0.0191002	Down-regulated
IL13RA1	Human	5.34108e-07	-0.814524	145	0.28	0.019519	Down-regulated
NFAM1	Human	5.48164e-07	-2.30961	47	148	0.0200327	Down-regulated
AGTPBP1	Human	5.62923e-07	-0.743066	274	416	0.020572	Down-regulated
MAN2A1	Human	5.77785e-07	-0.783309	196	332	0.0211152	Down-regulated
ADGRE2	Human	6.51403e-07	-2.16314	38	136	0.0238055	Down-regulated
EEIG2	Human	6.92213e-07	-0.92979	0.11	239	0.0252969	Down-regulated
FER	Human	6.9589e-07	-0.685922	0.23	372	0.0254313	Down-regulated
HLA-DQA1	Human	7.44539e-07	-1.86759	25	116	0.0272092	Down-regulated
IKZF1	Human	7.98899e-07	-0.571055	0.24	391	0.0291957	Down-regulated
DPP8	Human	8.2752e-07	-1.10246	63	173	0.0302417	Down-regulated
PLTP	Human	8.31234e-07	-1.92076	35	0.13	0.0303775	Down-regulated
ND1	Pig	8.4499e-07	-6.82078	0	72	0.0308802	Down-regulated
CD46	Human	8.5713e-07	-1.28913	82	197	0.0313238	Down-regulated
CNOT6L	Human	8.66757e-07	-1.48558	73	183	0.0316756	Down-regulated
RNF145	Human	8.74289e-07	-0.851053	161	295	0.0319509	Down-regulated
SMURF2	Human	8.75212e-07	-0.857411	139	268	0.0319846	Down-regulated
FAM107B	Human	8.81607e-07	-0.719644	123	253	0.0322183	Down-regulated
CYTIP	Human	8.974e-07	-1.1532	117	236	0.0327955	Down-regulated
BRWD3	Human	9.0253e-07	-1.0173	88	206	0.0329829	Down-regulated
MBNL1	Human	9.06456e-07	-0.511543	549	697	0.0331264	Down-regulated
PDK1	Human	9.18802e-07	-1.38357	44	143	0.0335776	Down-regulated
PDS5B	Human	9.71697e-07	-0.583727	174	317	0.0355107	Down-regulated
OSBPL8	Human	9.9521e-07	-0.594641	0.23	374	0.0363699	Down-regulated
ADAM7-AS1	Human	1.14459e-06	-4.59062	3	76	0.0418289	Down-regulated
HK2	Human	1.21243e-06	-1.06338	0.11	0.23	0.0443082	Down-regulated
ARRDC3	Human	1.23039e-06	-1.78652	66	169	0.0449645	Down-regulated
TAF15	Human	1.30806e-06	-0.891027	136	264	0.0478029	Down-regulated
ARL5A	Human	1.3654e-06	-1.99188	22	108	0.0498986	Down-regulated

## Sheet: NC
gene	Species	p_val	avg_log2FC	pct. 1	pct.2	p_val_adj	level
HERC5	Pig	3.21768e-10	5.10214	664	26	1.1759e-05	Up-regulated
ENSSSCG00000014280	Pig	1.14045e-09	3.26569	727	132	4.16779e-05	Up-regulated
MX2	Pig	5.42961e-09	8.3886	573	0	0.000198425	Up-regulated
CAMK2D	Pig	9.77043e-09	1.90085	909	553	0.00035706	Up-regulated
SORBS1	Pig	1.00818e-08	2.07831	836	316	0.00036844	Up-regulated
IFI44L	Pig	1.05702e-08	3.12459	691	132	0.000386288	Up-regulated
ENSSSCG00000034570	Pig	1.33806e-08	6.54311	573	26	0.000488993	Up-regulated
ERBIN	Pig	1.31683e-07	1.86406	864	553	0.00481236	Up-regulated
ADAMTS20	Pig	3.34293e-07	3.38903	609	132	0.0122167	Up-regulated
TMTC2	Pig	4.77067e-07	1.91469	773	263	0.0174344	Up-regulated
PHLPP1	Pig	1.35239e-06	2.27194	636	158	0.0494231	Up-regulated
PAPPA	Pig	7.51648e-09	-2.03972	745	921	0.00027469	Down-regulated
ENSSSCG00000033643	Pig	3.90304e-07	-3.25166	209	605	0.0142637	Down-regulated
IFNGR2	Pig	4.73276e-07	-2.68957	155	526	0.0172959	Down-regulated

## Sheet: Pericytes
gene	Species	p_val	avg_log2FC	pct. 1	pct.2	p_val_adj	level
MX2	Pig	2.68149e-63	11.4961	742	0	9.79951e-59	Up-regulated
OAS2	Pig	6.63064e-60	6.06134	746	0.07	2.42317e-55	Up-regulated
ENSSSCG00000034570	Pig	5.10806e-55	7.23318	702	51	1.86674e-50	Up-regulated
IFI44L	Pig	1.27874e-46	4.22944	685	0.13	4.67315e-42	Up-regulated
MX1	Pig	8.36948e-43	8.58237	573	5	3.05863e-38	Up-regulated
C7	Pig	5.87482e-42	2.81403	755	228	2.14695e-37	Up-regulated
HERC6	Pig	3.06503e-41	3.94526	652	0.13	1.12012e-36	Up-regulated
PLSCR4	Pig	5.93561e-40	1.80024	872	619	2.16917e-35	Up-regulated
EIF2AK2	Pig	3.29071e-39	3.8648	631	126	1.20259e-34	Up-regulated
ENSSSCG00000016263	Pig	1.62862e-38	3.45453	655	172	5.9518e-34	Up-regulated
HERC5	Pig	2.37141e-38	7.99192	533	9	8.66632e-34	Up-regulated
RSAD2	Pig	1.34414e-37	8.59848	522	5	4.91216e-33	Up-regulated
ZBTB16	Pig	3.5453e-34	1.19683	951	833	1.29563e-29	Up-regulated
ENSSSCG00000017146	Pig	7.25569e-33	3.64056	608	181	2.65159e-28	Up-regulated
IL1RAP	Pig	9.87765e-33	2.14063	0.78	465	3.60979e-28	Up-regulated
GPC5	Pig	2.54665e-31	6.6125	484	33	9.30673e-27	Up-regulated
PID1	Pig	9.84756e-30	1.56231	857	521	3.59879e-25	Up-regulated
IGF1	Pig	2.63724e-29	5.51838	469	37	9.63778e-25	Up-regulated
SETX	Pig	3.21302e-29	2.41836	0.68	321	1.1742e-24	Up-regulated
PARP12	Pig	1.36578e-28	4.09084	497	74	4.99125e-24	Up-regulated
ENSSSCG00000010893	Pig	3.59928e-28	4.81064	452	28	1.31536e-23	Up-regulated
USP18	Pig	3.70623e-28	5.67339	444	28	1.35444e-23	Up-regulated
CAMK2D	Pig	5.38322e-28	1.75414	765	549	1.9673e-23	Up-regulated
ZNFX1	Pig	1.04595e-27	3.94939	525	0.13	3.82244e-23	Up-regulated
CTTNBP2	Pig	2.4957e-26	3.0841	559	158	9.12054e-22	Up-regulated
IFI44	Pig	2.9028e-26	4.71027	439	42	1.06083e-21	Up-regulated
ISG12(A)	Pig	1.22665e-25	4.79479	448	0.06	4.4828e-21	Up-regulated
KHDRBS3	Pig	2.90135e-25	4.1673	458	65	1.0603e-20	Up-regulated
ENSSSCG00000027046	Pig	7.55646e-23	9.11282	348	0	2.76151e-18	Up-regulated
DDX60	Pig	3.03594e-22	6.20125	354	9	1.10949e-17	Up-regulated
ENSSSCG00000001341	Pig	9.22173e-22	2.91319	492	144	3.37008e-17	Up-regulated
PARP14	Pig	1.07367e-21	9.00398	333	0	3.92374e-17	Up-regulated
BST2	Pig	6.89337e-21	5.73967	352	23	2.51918e-16	Up-regulated
ISG15	Pig	3.67933e-20	6.88945	326	9	1.34461e-15	Up-regulated
PREX2	Pig	2.36905e-19	2.07335	554	223	8.6577e-15	Up-regulated
STAT1	Pig	3.70368e-19	1.99969	605	363	1.35351e-14	Up-regulated
WDR17	Pig	5.1271e-19	2.32374	495	177	1.8737e-14	Up-regulated
EPSTI1	Pig	7.45047e-19	4.08532	386	74	2.72277e-14	Up-regulated
ANO3	Pig	2.26266e-18	2.57341	476	149	8.2689e-14	Up-regulated
IFIT1	Pig	6.35037e-18	5.93204	307	19	2.32074e-13	Up-regulated
FMO1	Pig	8.7316e-18	2.9559	348	42	3.19096e-13	Up-regulated
ACSL3	Pig	9.92637e-18	2.76896	503	233	3.62759e-13	Up-regulated
FMO4	Pig	2.61013e-17	3.0665	441	144	9.53871e-13	Up-regulated
CACNB2	Pig	3.19556e-17	0.911829	915	0.73	1.16782e-12	Up-regulated
COMMD6	Pig	3.85674e-17	1.72793	621	349	1.40945e-12	Up-regulated
PML	Pig	5.50785e-17	3.99251	367	79	2.01285e-12	Up-regulated
SAT1	Pig	2.58289e-16	2.56236	493	223	9.43917e-12	Up-regulated
FKBP5	Pig	3.56896e-16	0.772994	893	795	1.30428e-11	Up-regulated
F3	Pig	4.64682e-16	2.28215	501	223	1.69818e-11	Up-regulated
GPM6B	Pig	2.9528e-15	2.01311	529	251	1.0791e-10	Up-regulated
ENSSSCG00000014280	Pig	1.06504e-14	2.24142	518	284	3.8922e-10	Up-regulated
TMEM182	Pig	1.13027e-14	5.05364	269	23	4.13057e-10	Up-regulated
ENSSSCG00000025253	Pig	1.23909e-14	8.45885	234	0	4.52825e-10	Up-regulated
TRIM22	Pig	1.31723e-14	3.36732	347	88	4.81383e-10	Up-regulated
ENSSSCG00000004387	Pig	2.1419e-14	1.48001	0.64	456	7.82758e-10	Up-regulated
IFIH1	Pig	2.88455e-14	3.10093	358	102	1.05416e-09	Up-regulated
PBX1	Pig	2.91476e-14	1.04618	759	549	1.0652e-09	Up-regulated
ZBP1	Pig	6.37108e-14	4.90839	247	14	2.32831e-09	Up-regulated
DTX3L	Pig	7.71177e-14	3.9468	279	37	2.81827e-09	Up-regulated
CD36	Pig	8.63232e-14	1.64567	554	321	3.15468e-09	Up-regulated
MAGI1	Pig	1.1148e-13	1.09653	782	679	4.07403e-09	Up-regulated
CMPK2	Pig	1.15668e-13	5.90649	234	9	4.2271e-09	Up-regulated
PLSCR1	Pig	1.35033e-13	2.44909	401	158	4.9348e-09	Up-regulated
TENM3	Pig	3.16481e-13	5.10044	254	28	1.15658e-08	Up-regulated
ZFY	Pig	3.66189e-13	8.06608	211	0	1.33824e-08	Up-regulated
FBLN5	Pig	7.13453e-13	1.86025	533	335	2.60731e-08	Up-regulated
ENSSSCG00000001229	Pig	1.05813e-12	2.04242	514	312	3.86695e-08	Up-regulated
HIF1A	Pig	1.44784e-12	1.58705	603	465	5.29114e-08	Up-regulated
THSD4	Pig	1.63696e-12	1.29129	648	451	5.98227e-08	Up-regulated
TRANK1	Pig	2.00859e-12	3.74314	0.26	37	7.34039e-08	Up-regulated
GTPBP8	Pig	2.13005e-12	3.28348	343	107	7.78426e-08	Up-regulated
DAAM1	Pig	2.22604e-12	1.52566	591	423	8.13505e-08	Up-regulated
FBXO39	Pig	2.86406e-12	1.76525	501	293	1.04667e-07	Up-regulated
DYNC1I1	Pig	3.59001e-12	2.15918	501	302	1.31197e-07	Up-regulated
ENSSSCG00000026430	Pig	4.34553e-12	8.07075	194	0	1.58807e-07	Up-regulated
KLHL8	Pig	4.47409e-12	5.92333	209	9	1.63506e-07	Up-regulated
ENSSSCG00000014565	Pig	4.69625e-12	4.16291	266	51	1.71624e-07	Up-regulated
B2M	Pig	5.96033e-12	2.11961	465	265	2.1782e-07	Up-regulated
LTBP1	Pig	2.00028e-11	0.806196	774	0.6	7.31002e-07	Up-regulated
RIPOR3	Pig	2.01314e-11	1.56172	358	126	7.35701e-07	Up-regulated
NBN	Pig	2.56401e-11	2.01606	452	256	9.37018e-07	Up-regulated
EDNRB	Pig	2.80577e-11	0.958418	736	628	1.02537e-06	Up-regulated
RYR2	Pig	2.92685e-11	3.54865	271	0.06	1.06962e-06	Up-regulated
ENSSSCG00000032436	Pig	2.98199e-11	3.84457	245	42	1.08977e-06	Up-regulated
KDM5D	Pig	4.88407e-11	8.0659	177	0	1.78488e-06	Up-regulated
SORL1	Pig	6.33521e-11	3.04296	281	0.07	2.3152e-06	Up-regulated
MGMT	Pig	1.36001e-10	1.1726	584	386	4.97017e-06	Up-regulated
ADAMTS9	Pig	1.4023e-10	0.556781	0.71	586	5.12471e-06	Up-regulated
IFIT5	Pig	1.4736e-10	3.53598	211	23	5.38528e-06	Up-regulated
TTN	Pig	1.51044e-10	5.02513	207	23	5.51989e-06	Up-regulated
NT5DC3	Pig	1.66416e-10	2.39671	358	153	6.08168e-06	Up-regulated
ENSSSCG00000006418	Pig	1.85288e-10	5.17269	185	9	6.77135e-06	Up-regulated
STK39	Pig	3.85603e-10	0.817946	808	758	1.40919e-05	Up-regulated
FOXS1	Pig	5.65562e-10	3.09851	273	79	2.06685e-05	Up-regulated
CCDC141	Pig	6.20674e-10	1.54771	537	381	2.26825e-05	Up-regulated
ZFAND5	Pig	6.88409e-10	2.2417	367	177	2.51579e-05	Up-regulated
ACER2	Pig	9.17403e-10	4.13041	209	33	3.35265e-05	Up-regulated
ENSSSCG00000016868	Pig	1.1581e-09	2.68653	335	0.14	4.23227e-05	Up-regulated
HGF	Pig	1.41694e-09	1.54971	0.51	326	5.17822e-05	Up-regulated
ENSSSCG00000017754	Pig	1.66358e-09	5.54266	183	19	6.07954e-05	Up-regulated
LIN7A	Pig	1.79226e-09	2.54738	224	42	6.54981e-05	Up-regulated
TGFBR3	Pig	1.81468e-09	1.3789	557	391	6.63175e-05	Up-regulated
VAV3	Pig	2.29338e-09	3.34989	169	9	8.38116e-05	Up-regulated
LGALS3BP	Pig	2.75666e-09	4.67207	181	19	0.000100742	Up-regulated
UBE2L6	Pig	4.56549e-09	4.34987	177	19	0.000166846	Up-regulated
LRMDA	Pig	4.70697e-09	0.916383	693	526	0.000172016	Up-regulated
CHSY3	Pig	6.5974e-09	1.99594	486	321	0.000241102	Up-regulated
ZBTB20	Pig	8.15556e-09	0.566463	906	893	0.000298045	Up-regulated
PTPRE	Pig	1.00716e-08	2.33268	305	121	0.000368067	Up-regulated
FOXO1	Pig	1.01774e-08	1.86455	444	284	0.000371934	Up-regulated
ACSS3	Pig	1.04597e-08	3.64321	222	56	0.000382249	Up-regulated
THSD7A	Pig	1.23282e-08	1.35219	499	0.33	0.000450534	Up-regulated
PI15	Pig	1.66866e-08	1.30336	305	112	0.000609812	Up-regulated
ENSSSCG00000014672	Pig	1.67807e-08	6.4857	143	5	0.000613252	Up-regulated
PARP9	Pig	1.73844e-08	3.48533	169	19	0.000635313	Up-regulated
SELENOP	Pig	1.86279e-08	2.74466	267	93	0.000680755	Up-regulated
ENSSSCG00000036622	Pig	1.88954e-08	2.97563	234	65	0.000690534	Up-regulated
ZC3HAV1	Pig	2.53654e-08	1.96278	282	107	0.000926979	Up-regulated
FGF2	Pig	2.62562e-08	2.22062	333	158	0.000959534	Up-regulated
UGP2	Pig	2.65448e-08	1.54969	0.48	321	0.000970078	Up-regulated
KIAA1755	Pig	3.30958e-08	2.21275	296	121	0.00120949	Up-regulated
TP53INP1	Pig	4.37051e-08	2.55873	322	158	0.0015972	Up-regulated
NFIA	Pig	4.42879e-08	0.693463	814	781	0.0016185	Up-regulated
NMI	Pig	7.17178e-08	2.85534	218	0.06	0.00262093	Up-regulated
TRPM3	Pig	8.34008e-08	2.91864	224	65	0.00304788	Up-regulated
SERPING1	Pig	8.60301e-08	2.2967	262	93	0.00314397	Up-regulated
MMD	Pig	9.72572e-08	2.43375	296	0.13	0.00355427	Up-regulated
FNDC3A	Pig	1.09428e-07	0.699067	721	642	0.00399905	Up-regulated
SERPINE2	Pig	1.16299e-07	1.53379	448	302	0.00425015	Up-regulated
SYNPO2	Pig	1.26829e-07	1.07683	646	563	0.00463498	Up-regulated
GPC6	Pig	1.64652e-07	1.30755	529	367	0.00601721	Up-regulated
EIF1B	Pig	2.09244e-07	2.33001	352	205	0.00764682	Up-regulated
PDK4	Pig	2.36941e-07	4.27224	181	42	0.00865902	Up-regulated
SLFN11	Pig	2.50103e-07	4.7154	124	5	0.00914003	Up-regulated
PDE7B	Pig	2.82768e-07	1.27585	565	0.4	0.0103338	Up-regulated
OLFM3	Pig	3.19147e-07	3.0316	235	84	0.0116632	Up-regulated
GHSR	Pig	3.64268e-07	2.58203	0.19	47	0.0133122	Up-regulated
LPL	Pig	3.89252e-07	0.893513	0.65	553	0.0142252	Up-regulated
ENSSSCG00000009240	Pig	4.47265e-07	5.51628	119	5	0.0163453	Up-regulated
TXNIP	Pig	5.4948e-07	1.65885	367	223	0.0200807	Up-regulated
ATAD1	Pig	5.74762e-07	1.25943	484	367	0.0210047	Up-regulated
SLC40A1	Pig	6.79869e-07	3.18008	149	23	0.0248458	Up-regulated
ENSSSCG00000037509	Pig	7.71432e-07	6.93892	105	0	0.028192	Up-regulated
DACH1	Pig	8.97986e-07	1.69373	407	265	0.0328169	Up-regulated
MYO1B	Pig	1.00034e-06	0.583828	842	809	0.0365574	Up-regulated
ATP8A2	Pig	1.07715e-06	2.05143	207	65	0.0393644	Up-regulated
ZBTB38	Pig	1.15383e-06	1.50294	0.42	0.27	0.0421665	Up-regulated
KCNT2	Pig	1.15796e-06	1.98721	292	135	0.0423177	Up-regulated
PPP1R21	Pig	1.28069e-06	1.10247	573	507	0.0468029	Up-regulated
SEMA5B	Pig	2.46064e-51	-4.04725	23	0.46	8.99239e-47	Down-regulated
LOXL2	Pig	1.09344e-48	-3.30713	49	516	3.99598e-44	Down-regulated
ADAMTS12	Pig	2.24758e-45	-1.46343	808	986	8.21378e-41	Down-regulated
FN1	Pig	4.67239e-42	-3.91532	81	521	1.70753e-37	Down-regulated
COL18A1	Pig	5.64988e-41	-3.5138	43	442	2.06475e-36	Down-regulated
PALM2AKAP2	Pig	2.14644e-37	-1.80019	544	865	7.84418e-33	Down-regulated
COL15A1	Pig	2.00998e-36	-5.32657	15	326	7.34548e-32	Down-regulated
COX1	Pig	2.65605e-36	-2.65014	0.16	609	9.70655e-32	Down-regulated
ZBTB7C	Pig	9.7733e-35	-2.77175	75	465	3.57165e-30	Down-regulated
FARP1	Pig	1.08231e-33	-1.56196	655	902	3.95529e-29	Down-regulated
COX2	Pig	1.78639e-32	-1.8895	256	707	6.52836e-28	Down-regulated
COX3	Pig	2.29482e-32	-1.92046	235	698	8.38642e-28	Down-regulated
TRABD2B	Pig	3.84903e-32	-3.97171	15	298	1.40663e-27	Down-regulated
HSPG2	Pig	6.95942e-32	-2.41389	81	0.46	2.54332e-27	Down-regulated
PDLIM5	Pig	8.95017e-32	-2.5862	252	0.66	3.27084e-27	Down-regulated
FILIP1	Pig	6.76249e-31	-3.40497	38	349	2.47135e-26	Down-regulated
HS3ST5	Pig	1.66197e-30	-5.30509	13	279	6.07366e-26	Down-regulated
KLF6	Pig	2.75052e-29	-2.23488	92	0.46	1.00518e-24	Down-regulated
CDH11	Pig	6.66163e-29	-3.26669	45	353	2.43449e-24	Down-regulated
ST8SIA1	Pig	1.10006e-28	-2.15782	92	0.46	4.02016e-24	Down-regulated
ATP6	Pig	1.69028e-28	-2.26072	98	474	6.17714e-24	Down-regulated
CDK6	Pig	5.64252e-28	-1.74989	267	688	2.06206e-23	Down-regulated
ITGAV	Pig	7.9824e-28	-2.1403	186	572	2.91717e-23	Down-regulated
YPEL2	Pig	2.57256e-27	-1.65429	196	614	9.40142e-23	Down-regulated
ACTN1	Pig	5.15585e-27	-2.13492	134	526	1.8842e-22	Down-regulated
CYTB	Pig	8.17391e-27	-2.70929	0.04	0.33	2.98715e-22	Down-regulated
COLGALT2	Pig	2.2531e-26	-3.20522	19	265	8.23396e-22	Down-regulated
COL5A1	Pig	6.10096e-26	-2.29026	124	498	2.22959e-21	Down-regulated
MAP1B	Pig	7.26025e-26	-1.55643	298	702	2.65326e-21	Down-regulated
SAMD4A	Pig	9.08455e-26	-1.67776	218	619	3.31995e-21	Down-regulated
ND4	Pig	1.15614e-25	-3.17306	32	298	4.22512e-21	Down-regulated
TGM2	Pig	3.26144e-25	-3.13749	28	284	1.19189e-20	Down-regulated
FLNA	Pig	4.79122e-25	-1.72544	164	549	1.75095e-20	Down-regulated
DOK6	Pig	9.66206e-25	-2.336	77	391	3.531e-20	Down-regulated
TEAD1	Pig	1.39901e-24	-1.83722	151	516	5.11267e-20	Down-regulated
MCAM	Pig	1.80762e-24	-2.22237	87	414	6.60596e-20	Down-regulated
EPB41L1	Pig	9.62033e-24	-1.55993	77	395	3.51575e-19	Down-regulated
CD109	Pig	1.33909e-23	-2.51483	0.06	349	4.8937e-19	Down-regulated
DAB2IP	Pig	3.0546e-23	-2.01	141	488	1.1163e-18	Down-regulated
CSPG4	Pig	3.33513e-23	-2.47534	47	316	1.21882e-18	Down-regulated
MPPED2	Pig	4.09231e-23	-2.66031	32	279	1.49554e-18	Down-regulated
ELK3	Pig	9.80213e-23	-2.45872	0.04	298	3.58219e-18	Down-regulated
GLS	Pig	2.12091e-22	-1.48111	363	735	7.75087e-18	Down-regulated
SEPTIN11	Pig	2.58629e-22	-1.36849	307	702	9.45158e-18	Down-regulated
ENSSSCG00000008137	Pig	2.85833e-22	-1.46966	318	693	1.04458e-17	Down-regulated
ENSSSCG00000028092	Pig	3.97811e-22	-1.94303	145	484	1.4538e-17	Down-regulated
TEX14	Pig	6.47996e-22	-1.83658	153	507	2.3681e-17	Down-regulated
IL34	Pig	6.48024e-22	-2.00926	0.1	409	2.3682e-17	Down-regulated
RHOA	Pig	6.50722e-21	-1.24971	345	712	2.37806e-16	Down-regulated
SMG6	Pig	6.86762e-21	-1.50767	258	633	2.50977e-16	Down-regulated
LDLRAD3	Pig	8.02441e-21	-2.27575	51	307	2.93252e-16	Down-regulated
AKAP12	Pig	9.45831e-21	-2.2214	87	372	3.45654e-16	Down-regulated
GLIS3	Pig	9.49036e-21	-1.72259	273	633	3.46825e-16	Down-regulated
PLCE1	Pig	1.03787e-20	-1.38405	64	335	3.79291e-16	Down-regulated
TRERF1	Pig	1.26683e-20	-1.49197	128	456	4.62964e-16	Down-regulated
TANC1	Pig	1.35684e-20	-1.47397	249	605	4.95857e-16	Down-regulated
CCDC3	Pig	1.57521e-20	-3.37891	17	214	5.75661e-16	Down-regulated
PALLD	Pig	2.76312e-20	-1.66768	105	414	1.00978e-15	Down-regulated
ANO1	Pig	6.2327e-20	-1.38841	237	0.6	2.27774e-15	Down-regulated
BACH2	Pig	6.23759e-20	-2.68712	56	302	2.27953e-15	Down-regulated
ENSSSCG00000004578	Pig	7.02104e-20	-1.6928	89	377	2.56584e-15	Down-regulated
ANO4	Pig	8.71334e-20	-1.47998	89	377	3.18429e-15	Down-regulated
EGLN3	Pig	1.27635e-19	-2.81396	26	233	4.66443e-15	Down-regulated
ND5	Pig	1.40044e-19	-2.914	23	223	5.1179e-15	Down-regulated
NEURL1B	Pig	2.08338e-19	-1.39625	211	563	7.61371e-15	Down-regulated
ND2	Pig	2.28475e-19	-3.5507	17	205	8.34962e-15	Down-regulated
NOTCH3	Pig	4.30433e-19	-1.50283	194	0.54	1.57302e-14	Down-regulated
ZFHX3	Pig	5.77042e-19	-1.14971	299	0.67	2.1088e-14	Down-regulated
PEAK1	Pig	5.95873e-19	-1.10358	505	819	2.17762e-14	Down-regulated
CREB5	Pig	6.27754e-19	-2.07607	115	0.4	2.29413e-14	Down-regulated
BMP1	Pig	6.41328e-19	-1.68513	134	447	2.34373e-14	Down-regulated
ADAM12	Pig	7.06019e-19	-2.08223	0.19	488	2.58014e-14	Down-regulated
ND1	Pig	7.15512e-19	-3.06606	28	233	2.61484e-14	Down-regulated
MAST4	Pig	7.92508e-19	-0.733396	959	1	2.89622e-14	Down-regulated
CSRP2	Pig	1.27602e-18	-2.37419	0.03	237	4.66323e-14	Down-regulated
ANXA1	Pig	1.34135e-18	-2.03424	0.07	0.33	4.90198e-14	Down-regulated
ENOX1	Pig	1.38076e-18	-1.44219	309	628	5.04597e-14	Down-regulated
ROR1	Pig	1.57425e-18	-2.65971	55	288	5.75309e-14	Down-regulated
LAMB1	Pig	2.62528e-18	-1.64033	105	0.4	9.59409e-14	Down-regulated
ENSSSCG00000000145	Pig	3.04646e-18	-1.21307	384	749	1.11333e-13	Down-regulated
DOCK5	Pig	3.11586e-18	-2.7107	32	237	1.13869e-13	Down-regulated
ENSSSCG00000049691	Pig	3.61916e-18	-1.53206	324	651	1.32262e-13	Down-regulated
ADAMTS10	Pig	4.01125e-18	-1.84841	64	312	1.46591e-13	Down-regulated
FLT1	Pig	4.51325e-18	-2.63661	85	349	1.64937e-13	Down-regulated
RAPGEF2	Pig	5.07339e-18	-1.12197	678	0.86	1.85407e-13	Down-regulated
ARHGAP22	Pig	7.18497e-18	-6.51639	4	149	2.62575e-13	Down-regulated
SULF2	Pig	9.70547e-18	-2.72251	26	219	3.54686e-13	Down-regulated
FYN	Pig	9.95039e-18	-1.0574	275	656	3.63637e-13	Down-regulated
STC1	Pig	1.18366e-17	-3.69202	21	0.2	4.3257e-13	Down-regulated
COL5A3	Pig	1.24024e-17	-0.938508	478	795	4.53244e-13	Down-regulated
ARNTL2	Pig	2.03654e-17	-1.61673	128	419	7.44252e-13	Down-regulated
PRRX2	Pig	3.05759e-17	-2.00272	23	205	1.1174e-12	Down-regulated
NID2	Pig	3.14696e-17	-1.40174	132	428	1.15006e-12	Down-regulated
LAMA4	Pig	3.18777e-17	-1.25583	301	633	1.16497e-12	Down-regulated
SYCP2	Pig	3.35917e-17	-1.19312	215	544	1.22761e-12	Down-regulated
PHLDB2	Pig	3.4294e-17	-1.18105	175	507	1.25327e-12	Down-regulated
GLI3	Pig	3.83823e-17	-1.28356	331	679	1.40268e-12	Down-regulated
RBMS3	Pig	3.90874e-17	-0.658224	944	972	1.42845e-12	Down-regulated
ENSSSCG00000006395	Pig	4.24728e-17	-2.17176	64	298	1.55217e-12	Down-regulated
ADAMTS2	Pig	5.83424e-17	-1.70103	124	405	2.13212e-12	Down-regulated
VIM	Pig	6.78697e-17	-1.18337	0.16	0.47	2.4803e-12	Down-regulated
IQGAP1	Pig	7.87898e-17	-1.30897	0.36	684	2.87937e-12	Down-regulated
ACTA2	Pig	1.01471e-16	-1.93207	136	423	3.70825e-12	Down-regulated
ELL2	Pig	1.42551e-16	-1.33663	237	567	5.20951e-12	Down-regulated
SLC25A24	Pig	1.51922e-16	-1.22323	183	507	5.552e-12	Down-regulated
JAG1	Pig	1.77403e-16	-1.12884	173	493	6.4832e-12	Down-regulated
TTLL7	Pig	1.799e-16	-1.65543	128	409	6.57444e-12	Down-regulated
PDLIM7	Pig	2.34645e-16	-1.39355	115	395	8.5751e-12	Down-regulated
ENSSSCG00000014822	Pig	2.50326e-16	-1.11556	273	623	9.14817e-12	Down-regulated
FSTL1	Pig	2.70634e-16	-1.37157	286	595	9.89032e-12	Down-regulated
FGD5	Pig	3.66484e-16	-2.61224	32	219	1.33932e-11	Down-regulated
LHFPL2	Pig	5.86057e-16	-1.45902	126	405	2.14175e-11	Down-regulated
NCALD	Pig	5.93628e-16	-1.20245	397	707	2.16942e-11	Down-regulated
EBF2	Pig	6.90593e-16	-0.800978	0.77	926	2.52377e-11	Down-regulated
ASAP3	Pig	8.54547e-16	-1.5867	92	0.34	3.12294e-11	Down-regulated
VCL	Pig	8.61487e-16	-1.07112	0.54	819	3.1483e-11	Down-regulated
UNC5B	Pig	1.22973e-15	-1.63158	56	274	4.49405e-11	Down-regulated
TUBB	Pig	1.5271e-15	-2.48536	38	228	5.5808e-11	Down-regulated
PCDH18	Pig	1.72122e-15	-1.99559	36	223	6.29021e-11	Down-regulated
MYO9B	Pig	2.08969e-15	-1.20563	117	391	7.63679e-11	Down-regulated
CRIM1	Pig	2.39389e-15	-1.80449	183	465	8.74847e-11	Down-regulated
TPM1	Pig	3.79774e-15	-0.917015	687	0.86	1.38788e-10	Down-regulated
ITGB1	Pig	4.37462e-15	-1.01611	461	767	1.5987e-10	Down-regulated
ENSSSCG00000044700	Pig	4.97929e-15	-0.772546	902	949	1.81968e-10	Down-regulated
RUNX1	Pig	5.92236e-15	-1.31277	267	581	2.16432e-10	Down-regulated
FRMD4A	Pig	6.58847e-15	-0.900064	723	884	2.40776e-10	Down-regulated
LASP1	Pig	9.17038e-15	-1.68808	81	312	3.35131e-10	Down-regulated
FLNB	Pig	1.42722e-14	-3.83851	6	0.13	5.21578e-10	Down-regulated
SRPX2	Pig	1.50166e-14	-2.18962	26	191	5.4878e-10	Down-regulated
ZNF521	Pig	1.82631e-14	-1.26819	117	372	6.67424e-10	Down-regulated
ENSSSCG00000009338	Pig	1.92798e-14	-0.66725	763	0.93	7.0458e-10	Down-regulated
CSRP1	Pig	2.076e-14	-1.24741	113	372	7.58673e-10	Down-regulated
FAM114A1	Pig	2.60225e-14	-1.75207	85	312	9.50991e-10	Down-regulated
SELENOM	Pig	2.78545e-14	-2.23993	36	214	1.01794e-09	Down-regulated
FAM126A	Pig	4.15512e-14	-1.16843	241	549	1.51849e-09	Down-regulated
DOCK7	Pig	4.69304e-14	-1.07786	296	0.6	1.71507e-09	Down-regulated
PPARG	Pig	4.99446e-14	-2.46047	26	186	1.82522e-09	Down-regulated
FABP5	Pig	5.05384e-14	-5.28279	2	112	1.84693e-09	Down-regulated
SOCS5	Pig	5.05393e-14	-1.34979	239	544	1.84696e-09	Down-regulated
DPYD	Pig	5.20558e-14	-0.96398	335	656	1.90238e-09	Down-regulated
ND3	Pig	5.39039e-14	-3.85795	2	112	1.96992e-09	Down-regulated
SWAP70	Pig	5.7206e-14	-1.89169	64	0.27	2.09059e-09	Down-regulated
MAST2	Pig	5.78313e-14	-1.33808	89	312	2.11345e-09	Down-regulated
UBE2E2	Pig	6.09901e-14	-0.844458	586	823	2.22888e-09	Down-regulated
CPEB2	Pig	6.76745e-14	-1.71852	73	288	2.47317e-09	Down-regulated
BCAT1	Pig	8.87859e-14	-3.75643	8	0.13	3.24468e-09	Down-regulated
ENSSSCG00000011729	Pig	9.46834e-14	-1.98445	58	251	3.4602e-09	Down-regulated
NCOR2	Pig	9.50993e-14	-1.26176	202	493	3.4754e-09	Down-regulated
ZNF385D	Pig	1.00058e-13	-2.98006	24	177	3.65662e-09	Down-regulated
TMEM65	Pig	1.30765e-13	-1.28346	166	433	4.77879e-09	Down-regulated
DGKI	Pig	1.54019e-13	-2.79223	26	181	5.62861e-09	Down-regulated
LRCH1	Pig	1.5602e-13	-0.930942	292	614	5.70176e-09	Down-regulated
PKM	Pig	1.75244e-13	-1.22449	134	395	6.4043e-09	Down-regulated
ASAP2	Pig	1.88436e-13	-0.96811	185	474	6.8864e-09	Down-regulated
PCDH17	Pig	1.88601e-13	-5.32278	2	107	6.89241e-09	Down-regulated
ECM1	Pig	2.71665e-13	-2.87844	45	219	9.92799e-09	Down-regulated
SMURF1	Pig	3.11713e-13	-0.788226	337	651	1.13916e-08	Down-regulated
MRC2	Pig	3.33852e-13	-2.23381	68	265	1.22006e-08	Down-regulated
TNIK	Pig	3.5117e-13	-1.134	109	344	1.28335e-08	Down-regulated
PFKFB3	Pig	3.51394e-13	-1.16011	98	0.33	1.28417e-08	Down-regulated
KCTD9	Pig	3.51825e-13	-1.27067	98	326	1.28575e-08	Down-regulated
ADGRL3	Pig	3.82674e-13	-1.43373	0.09	307	1.39848e-08	Down-regulated
ANGPT2	Pig	4.16375e-13	-2.59279	32	191	1.52164e-08	Down-regulated
ENSSSCG00000030362	Pig	5.39377e-13	-1.09684	132	386	1.97115e-08	Down-regulated
MAP4	Pig	5.77101e-13	-0.80905	373	698	2.10902e-08	Down-regulated
COLGALT1	Pig	7.05094e-13	-1.88632	28	181	2.57676e-08	Down-regulated
GALNT18	Pig	7.42392e-13	-1.18801	119	358	2.71307e-08	Down-regulated
TLN1	Pig	7.6491e-13	-1.59221	89	307	2.79536e-08	Down-regulated
MYO10	Pig	7.8026e-13	-1.49654	107	0.33	2.85146e-08	Down-regulated
RASSF3	Pig	8.35512e-13	-1.06512	234	521	3.05338e-08	Down-regulated
AGPS	Pig	9.45577e-13	-1.21213	143	0.4	3.45561e-08	Down-regulated
DBN1	Pig	1.09496e-12	-6.98883	0	93	4.00152e-08	Down-regulated
ATP2B4	Pig	1.10614e-12	-1.28003	105	335	4.0424e-08	Down-regulated
KIF1B	Pig	1.1354e-12	-0.870194	0.26	563	4.14933e-08	Down-regulated
MERTK	Pig	1.35989e-12	-2.38573	24	167	4.96972e-08	Down-regulated
TGFB1I1	Pig	1.46891e-12	-1.92415	51	228	5.36812e-08	Down-regulated
ETS1	Pig	1.68395e-12	-0.923889	333	633	6.15398e-08	Down-regulated
SMAD2	Pig	1.76314e-12	-1.03211	234	526	6.44339e-08	Down-regulated
C1orf21	Pig	2.00596e-12	-1.00502	456	707	7.33077e-08	Down-regulated
CDK14	Pig	2.15969e-12	-0.756277	599	814	7.8926e-08	Down-regulated
RASA3	Pig	2.20964e-12	-0.876798	275	572	8.07512e-08	Down-regulated
UTRN	Pig	2.3524e-12	-0.639958	704	879	8.59683e-08	Down-regulated
CABLES1	Pig	2.91507e-12	-0.954076	139	391	1.06531e-07	Down-regulated
PARD3	Pig	3.04714e-12	-0.797742	768	884	1.11358e-07	Down-regulated
MSN	Pig	3.09536e-12	-1.14471	215	507	1.1312e-07	Down-regulated
NREP	Pig	3.35131e-12	-2.38272	51	219	1.22474e-07	Down-regulated
LMNB1	Pig	3.74382e-12	-2.69898	17	144	1.36818e-07	Down-regulated
ITGA8	Pig	4.35421e-12	-1.25867	102	316	1.59125e-07	Down-regulated
ENSSSCG00000022925	Pig	4.39656e-12	-0.78168	567	814	1.60672e-07	Down-regulated
ITGA1	Pig	4.43267e-12	-0.886613	546	772	1.61992e-07	Down-regulated
POLDIP3	Pig	4.7809e-12	-1.40278	43	209	1.74718e-07	Down-regulated
SIPA1L1	Pig	4.79132e-12	-1.07388	124	358	1.75099e-07	Down-regulated
ENSSSCG00000044127	Pig	4.92177e-12	-1.13687	145	395	1.79866e-07	Down-regulated
EEF2	Pig	4.93482e-12	-1.7792	77	0.27	1.80343e-07	Down-regulated
ENSSSCG00000033262	Pig	5.18987e-12	-1.24139	168	414	1.89664e-07	Down-regulated
PIP4K2A	Pig	6.19395e-12	-0.853139	0.32	628	2.26358e-07	Down-regulated
COL4A2	Pig	6.42582e-12	-0.73732	814	926	2.34832e-07	Down-regulated
COL1A2	Pig	6.77387e-12	-1.2356	192	451	2.47551e-07	Down-regulated
APBB2	Pig	6.78045e-12	-0.981793	537	772	2.47792e-07	Down-regulated
LZTS1	Pig	6.92101e-12	-1.3415	19	149	2.52928e-07	Down-regulated
MICAL3	Pig	7.57013e-12	-0.958623	162	419	2.7665e-07	Down-regulated
KLF7	Pig	8.12304e-12	-0.871689	264	563	2.96857e-07	Down-regulated
NES	Pig	8.49179e-12	-1.63719	79	274	3.10332e-07	Down-regulated
ANXA5	Pig	9.82148e-12	-0.997189	218	488	3.58926e-07	Down-regulated
SPIRE1	Pig	1.16055e-11	-1.1848	81	279	4.24123e-07	Down-regulated
PDE4B	Pig	1.16187e-11	-1.1271	104	316	4.24604e-07	Down-regulated
STPG4	Pig	1.32011e-11	-1.34114	154	395	4.82436e-07	Down-regulated
INPP4B	Pig	1.37952e-11	-1.24498	493	758	5.04144e-07	Down-regulated
ARNTL	Pig	1.40523e-11	-1.05633	94	307	5.13542e-07	Down-regulated
STX2	Pig	1.42074e-11	-1.25894	64	251	5.19208e-07	Down-regulated
MRTFB	Pig	1.45786e-11	-0.95261	232	507	5.32774e-07	Down-regulated
MALAT1	Human	1.93866e-11	-3.57651	4	98	7.08485e-07	Down-regulated
PPP1R12A	Pig	2.01535e-11	-0.577287	757	884	7.36508e-07	Down-regulated
PRTFDC1	Pig	2.26167e-11	-1.83233	55	223	8.26529e-07	Down-regulated
DIAPH3	Pig	2.36152e-11	-3.55033	13	126	8.63017e-07	Down-regulated
MYOF	Pig	2.41168e-11	-0.908042	237	512	8.81348e-07	Down-regulated
ENSSSCG00000037142	Pig	2.46659e-11	-2.25681	47	205	9.01415e-07	Down-regulated
PAPSS1	Pig	2.55952e-11	-0.808159	164	423	9.35376e-07	Down-regulated
SLC20A2	Pig	2.5731e-11	-1.28889	185	442	9.40339e-07	Down-regulated
ADGRL2	Pig	2.6437e-11	-0.895118	435	726	9.66141e-07	Down-regulated
DAPK3	Pig	2.71093e-11	-1.10439	49	214	9.90709e-07	Down-regulated
PBX3	Pig	3.14254e-11	-1.2435	119	335	1.14844e-06	Down-regulated
TRPC3	Pig	3.22204e-11	-2.98042	13	126	1.17749e-06	Down-regulated
HACD2	Pig	3.3222e-11	-1.73573	96	293	1.2141e-06	Down-regulated
PTPRT	Pig	3.34559e-11	-3.10016	28	163	1.22265e-06	Down-regulated
ENSSSCG00000038713	Pig	3.48955e-11	-1.6914	41	195	1.27526e-06	Down-regulated
TSPAN15	Pig	3.51446e-11	-0.659984	109	0.33	1.28436e-06	Down-regulated
CAP1	Pig	3.52415e-11	-1.63527	62	237	1.2879e-06	Down-regulated
RAP1GDS1	Pig	3.66011e-11	-1.67413	64	237	1.33759e-06	Down-regulated
ENSSSCG00000015645	Pig	4.15193e-11	-0.786668	245	535	1.51732e-06	Down-regulated
TGFB1	Pig	4.52987e-11	-2.86882	17	135	1.65544e-06	Down-regulated
AK4	Pig	5.05622e-11	-0.996442	154	395	1.84779e-06	Down-regulated
ROBO4	Pig	5.78919e-11	-6.84217	0	79	2.11566e-06	Down-regulated
MAPK10	Pig	5.93807e-11	-0.806839	228	493	2.17007e-06	Down-regulated
MARCKS	Pig	6.46796e-11	-2.25825	23	149	2.36372e-06	Down-regulated
PKP4	Pig	6.51347e-11	-1.29798	132	349	2.38035e-06	Down-regulated
EML1	Pig	8.50572e-11	-1.10805	0.06	233	3.10842e-06	Down-regulated
CD9	Pig	8.59712e-11	-0.840842	85	279	3.14182e-06	Down-regulated
ENSSSCG00000032383	Pig	9.14088e-11	-1.20834	465	0.74	3.34053e-06	Down-regulated
ENSSSCG00000039009	Pig	9.25381e-11	-0.892199	307	572	3.3818e-06	Down-regulated
CDCA7	Pig	1.19642e-10	-2.44901	11	116	4.37231e-06	Down-regulated
ARHGAP42	Pig	1.20632e-10	-0.82268	655	851	4.40851e-06	Down-regulated
RPL31	Pig	1.24071e-10	-1.44283	0.16	391	4.53418e-06	Down-regulated
RPH3AL	Pig	1.28478e-10	-1.15147	41	191	4.69522e-06	Down-regulated
ST6GAL1	Pig	1.39619e-10	-2.42131	28	158	5.10239e-06	Down-regulated
CSPP1	Pig	1.39715e-10	-0.741693	198	0.46	5.1059e-06	Down-regulated
PTPN13	Pig	1.41411e-10	-0.675786	661	809	5.16788e-06	Down-regulated
PLEKHA1	Pig	1.42614e-10	-0.778408	198	465	5.21183e-06	Down-regulated
FAM171B	Pig	1.51107e-10	-2.40076	17	0.13	5.52222e-06	Down-regulated
CAVIN1	Pig	1.61295e-10	-1.42795	47	0.2	5.89451e-06	Down-regulated
CREB3L2	Pig	1.7301e-10	-0.646363	213	479	6.32266e-06	Down-regulated
SIPA1L2	Pig	1.73216e-10	-1.27499	55	214	6.33019e-06	Down-regulated
NDRG1	Pig	1.8952e-10	-2.82875	32	163	6.92602e-06	Down-regulated
RRBP1	Pig	1.9494e-10	-1.00799	0.13	353	7.1241e-06	Down-regulated
SEPTIN8	Pig	2.21692e-10	-1.20548	81	265	8.10175e-06	Down-regulated
LMCD1	Pig	2.53696e-10	-4.85818	4	88	9.27131e-06	Down-regulated
RAC1	Pig	2.61089e-10	-0.838418	202	465	9.54148e-06	Down-regulated
SUFU	Pig	2.7251e-10	-1.15269	136	353	9.95889e-06	Down-regulated
RAB17	Pig	2.86986e-10	-1.1625	58	219	1.04879e-05	Down-regulated
NIBAN2	Pig	3.02192e-10	-1.00419	102	302	1.10436e-05	Down-regulated
KPNB1	Pig	3.09875e-10	-0.779109	121	335	1.13244e-05	Down-regulated
DAAM2	Pig	3.14977e-10	-0.719941	488	777	1.15108e-05	Down-regulated
ADGRF5	Pig	3.15932e-10	-0.905516	501	758	1.15457e-05	Down-regulated
CORO1C	Pig	3.22338e-10	-0.826611	115	326	1.17798e-05	Down-regulated
ENSSSCG00000014569	Pig	3.24819e-10	-1.59326	72	242	1.18705e-05	Down-regulated
PPM1L	Pig	3.49048e-10	-1.8418	0.03	158	1.2756e-05	Down-regulated
SYNE3	Pig	3.5743e-10	-0.845848	79	0.26	1.30623e-05	Down-regulated
ENSSSCG00000023041	Pig	3.66895e-10	-1.36353	0.04	181	1.34082e-05	Down-regulated
GAPDH	Pig	4.12959e-10	-1.57309	79	251	1.50916e-05	Down-regulated
[truncated: 333 more rows]

## Sheet: SMC
gene	Species	p_val	avg_log2FC	pct. 1	pct.2	p_val_adj	level
[truncated: 2 more rows]
