# Supplementary material for: Integrated Molecular Profiling of Preclinical and Clinical Cardiac Xenotransplants
Source: Research Square preprint supplement (doi:10.21203/rs.3.rs-8406985/v1), 2026-02-04
Supplement: Supplementary file 50 [file ff3b19c315d620bf16f64736.xlsx]

## Sheet: Sheet1
Condition	Median OSM Core Score	Mean OSM Core Score	Standard Deviation (SD)
Control	0.3589	0.3524	0.0233
3-month protocol	0.3989	0.4127	0.0597
6-month protocol	0.4353	0.4391	0.0319
PCMV/PRV	0.4763	0.4913	0.0418
Rejection	0.4511	0.4422	0.1321
